# Supplementary material for: Quantitative Proteomic Analysis of Human Lung Tumor Xenografts Treated with the Ectopic ATP Synthase Inhibitor Citreoviridin
Source: PubMed Central journal article supplement (PMC3749231; doi:10.1371/journal.pone.0070642), 2013-08-21
Supplement: pone.0070642.s011.pdf [file pone.0070642.s011.pdf]

**Table S6. The  $S$  value calculated by normalization method 1 and 2 in the large-scale experiment.**

| Method | Description <sup>a</sup>                         | $S$ value <sup>b</sup> |                   |
|--------|--------------------------------------------------|------------------------|-------------------|
|        |                                                  | Mean                   | S.D. <sup>c</sup> |
| 1      | Equal summation of peptide iTRAQ signals         | 0.00574                | 0.34727           |
| 2      | Median of $\log_2$ (peptide iTRAQ ratio) to zero | -0.03737               | 0.42563           |

<sup>a</sup> Detail calculation are described in Method S1.

<sup>b</sup>  $S$  value is in  $\log_2$  scale:

$$S = \frac{1}{2} \log_2 \left( \frac{T_1 \cdot C_2}{T_2 \cdot C_1} \right) = \frac{1}{2} \left[ \log_2 \left( \frac{T_1}{C_1} \right) - \log_2 \left( \frac{T_2}{C_2} \right) \right]$$

where  $T_1/C_1$  is the protein abundance ratio of citreoviridin-treated tumor sample  $T_1$  to control sample  $C_1$ , while  $T_2/C_2$  is the protein abundance ratio of citreoviridin-treated tumor sample  $T_2$  to control sample  $C_2$ .

<sup>c</sup> S.D.: standard deviation.
