# Supplementary material for: Quantitative Proteomic Analysis of Human Lung Tumor Xenografts Treated with the Ectopic ATP Synthase Inhibitor Citreoviridin
Source: PubMed Central journal article supplement (PMC3749231; doi:10.1371/journal.pone.0070642), 2013-08-21
Supplement: pone.0070642.s016.pdf [file pone.0070642.s016.pdf]

**Table S11.** Gene Ontology biological process clustering enrichment analysis of down-regulated proteins with citreoviridin treatment.

| GO biological process cluster          | Enrichment score <sup>a</sup> | GO biological process term                           | Count <sup>b</sup> | p-Value |
|----------------------------------------|-------------------------------|------------------------------------------------------|--------------------|---------|
| <b>Macromolecular complex assembly</b> | <b>1.66</b>                   | macromolecular complex assembly                      | 8                  | 0.01    |
|                                        |                               | macromolecular complex subunit organization          | 8                  | 0.01    |
|                                        |                               | cellular macromolecular complex assembly             | 5                  | 0.03    |
|                                        |                               | protein complex assembly                             | 6                  | 0.03    |
|                                        |                               | protein complex biogenesis                           | 6                  | 0.03    |
|                                        |                               | cellular macromolecular complex subunit organization | 5                  | 0.04    |
| <b>Mitosis</b>                         | <b>1.35</b>                   | nuclear division                                     | 4                  | 0.04    |
|                                        |                               | mitosis                                              | 4                  | 0.04    |
|                                        |                               | M phase of mitotic cell cycle                        | 4                  | 0.04    |
|                                        |                               | organelle fission                                    | 4                  | 0.05    |

<sup>a</sup> The enrichment score is the geometric mean (in  $-\log$  scale) of the p-values of the members in the annotation cluster. It represents the significance of relevance between the group of annotations and the experimental dataset.

<sup>b</sup> Count: the number of proteins annotated with the GO term.
