# Supplementary material for: Quantitative Proteomic Analysis of Human Lung Tumor Xenografts Treated with the Ectopic ATP Synthase Inhibitor Citreoviridin
Source: PubMed Central journal article supplement (PMC3749231; doi:10.1371/journal.pone.0070642), 2013-08-21
Supplement: pone.0070642.s017.pdf [file pone.0070642.s017.pdf]

**Table S12. Top 5 networks of the differential proteome induced by citreoviridin in humans.**

| No. | Network                                                          | GO processes                                                                                                                                                                                                                                                                                                                                                        | Seed nodes <sup>a</sup> | p-Value <sup>b</sup> | zScore <sup>c</sup> | gScore <sup>d</sup> |
|-----|------------------------------------------------------------------|---------------------------------------------------------------------------------------------------------------------------------------------------------------------------------------------------------------------------------------------------------------------------------------------------------------------------------------------------------------------|-------------------------|----------------------|---------------------|---------------------|
| 1   | ANAPC1, TMEM48, PSMB3, TMF1, RBM3                                | cellular macromolecule catabolic process (65.3%; 1.217e-35), macromolecule catabolic process (65.3%; 1.209e-33), negative regulation of ubiquitin-protein ligase activity involved in mitotic cell cycle (36.7%; 8.645e-33), negative regulation of ligase activity (36.7%; 7.969e-32), negative regulation of ubiquitin-protein ligase activity (36.7%; 7.969e-32) | 7                       | 3.38E-11             | 19.99               | 19.99               |
| 2   | 14-3-3 zeta/delta, NF-kB2 (p52), RBBP5, KIF1C, Alpha-actinin 4   | positive regulation of biological process (75.0%; 7.781e-17), positive regulation of cellular process (70.8%; 5.017e-16), positive regulation of gene expression (47.9%; 1.318e-15), nervous system development (56.2%; 7.887e-15), system development (70.8%; 9.013e-15)                                                                                           | 6                       | 2.08E-09             | 17.27               | 17.27               |
| 3   | LDHA, LEDGF, DJ-1, SP1, LRP5                                     | S phase of mitotic cell cycle (36.0%; 4.053e-27), S phase (36.0%; 8.632e-27), regulation of cellular amino acid metabolic process (28.0%; 6.385e-25), mitotic cell cycle G1/S transition DNA damage checkpoint (30.0%; 8.107e-25), M/G1 transition of mitotic cell cycle (30.0%; 9.714e-25)                                                                         | 6                       | 2.08E-09             | 17.27               | 17.27               |
| 4   | OGT (GlcNAc transferase), ACOX1, MKLP2, FKBP12, Alpha-actinin 1  | protein polymerization (27.1%; 5.633e-23), 'de novo' protein folding (25.0%; 3.937e-20), microtubule-based movement (29.2%; 6.046e-19), 'de novo' posttranslational protein folding (22.9%; 2.327e-18), platelet degranulation (25.0%; 8.506e-18)                                                                                                                   | 6                       | 2.36E-09             | 17.09               | 17.09               |
| 5   | NEFM, ATP6M, SUPT5H, 14-3-3 zeta/delta, OGT (GlcNAc transferase) | response to organic substance (65.3%; 6.354e-18), gene expression (73.5%; 8.784e-18), regulation of cellular macromolecule biosynthetic process (73.5%; 1.315e-17), regulation of transcription, DNA-dependent (71.4%; 1.426e-17), regulation of RNA biosynthetic process (71.4%; 1.840e-17)                                                                        | 6                       | 2.36E-09             | 17.09               | 17.09               |

- <sup>a</sup> Seed nodes: the number of differentially expressed proteins identified in the experiments in the network.
- <sup>b</sup> The p-value represents a measure of relevance of the intersection between the experimental dataset and the network.
- <sup>c</sup> A high Z-score means the network is highly saturated with proteins from the experiment.
- <sup>d</sup> A high G-score means the network is saturated with proteins from the experiment (from Z-score) and it contains many Canonical Pathways.
