# Supplementary material for: Quantitative Proteomic Analysis of Human Lung Tumor Xenografts Treated with the Ectopic ATP Synthase Inhibitor Citreoviridin
Source: PubMed Central journal article supplement (PMC3749231; doi:10.1371/journal.pone.0070642), 2013-08-21
Supplement: pone.0070642.s018.pdf [file pone.0070642.s018.pdf]

Spectra S1: The information of single-peptide-based protein identifications in the duplicate experiment.

Query 2113 Hit 1

MS/MS Fragmentation of **LEQFVSILMASIPLPK**

Found in **sp|P00491|PNPH\_HUMAN**, Purine nucleoside phosphorylase OS=Homo sapiens GN=PNP PE=1 SV=2

Match to Query 2113: 2188.256from(730.4258,3+)

Title: 1440: Sum of 2 scans in range 3510 (rt=87.2714, f=4, i=953) to 3511 (rt=87.2969, f=4, i=954)

[D:\lab212\membrane\Grace\20120214\_iTRAQ\_2.raw]

Data File:

**Monoisotopic mass of neutral peptide Mr(calc): 2188.256**

**Variable modifications:**

**K17** iTRAQ4plex (K)

**Ions Score: 40.59 Expect: 0.037**

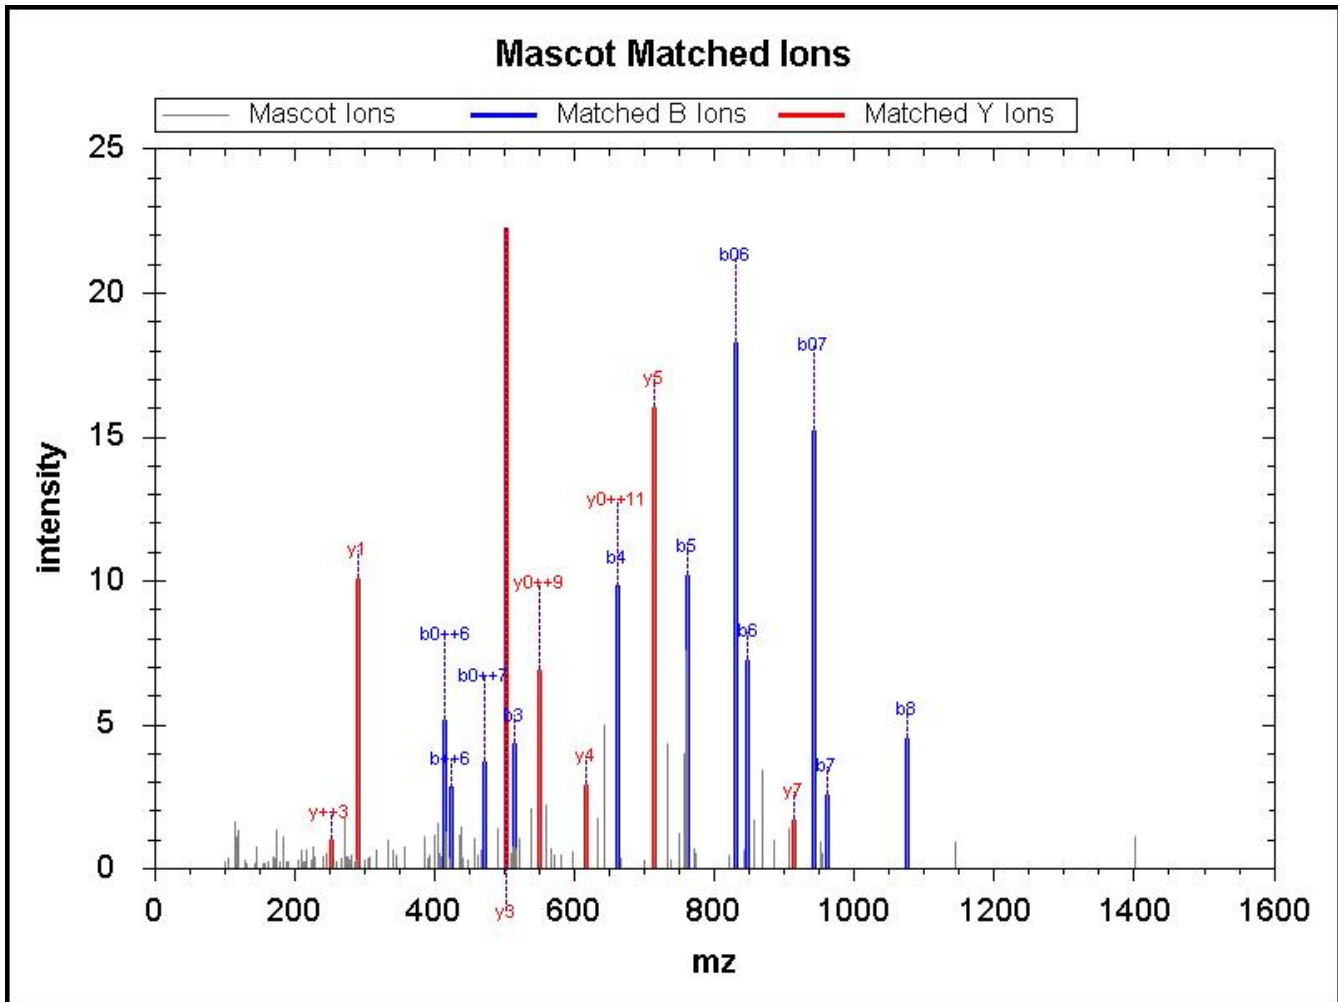

| No | b               | b++           | b*       | b*++   | b0            | b0++          | Seq | y             | y++    | y*       | y*++   | y0       | y0++          | RevNo |
|----|-----------------|---------------|----------|--------|---------------|---------------|-----|---------------|--------|----------|--------|----------|---------------|-------|
| 1  | 258.19          | 129.60        |          |        |               |               | L   |               |        |          |        |          |               | 17    |
| 2  | 387.24          | 194.12        |          |        | 369.23        | 185.12        | E   | 1,932.06      | 966.54 | 1,915.04 | 958.02 | 1,914.05 | 957.53        | 16    |
| 3  | <b>515.29</b>   | 258.15        | 498.27   | 249.64 | 497.28        | 249.15        | Q   | 1,803.02      | 902.01 | 1,785.99 | 893.50 | 1,785.01 | 893.01        | 15    |
| 4  | <b>662.36</b>   | 331.69        | 645.34   | 323.17 | 644.35        | 322.68        | F   | 1,674.96      | 837.98 | 1,657.94 | 829.47 | 1,656.95 | 828.98        | 14    |
| 5  | <b>761.43</b>   | 381.22        | 744.40   | 372.71 | 743.42        | 372.21        | V   | 1,527.89      | 764.45 | 1,510.87 | 755.94 | 1,509.88 | 755.45        | 13    |
| 6  | <b>848.46</b>   | <b>424.74</b> | 831.44   | 416.22 | <b>830.45</b> | <b>415.73</b> | S   | 1,428.83      | 714.92 | 1,411.80 | 706.40 | 1,410.81 | 705.91        | 12    |
| 7  | <b>961.55</b>   | 481.28        | 944.52   | 472.76 | <b>943.54</b> | <b>472.27</b> | I   | 1,341.79      | 671.40 | 1,324.77 | 662.89 | 1,323.78 | <b>662.40</b> | 11    |
| 8  | <b>1,074.63</b> | 537.82        | 1,057.61 | 529.31 | 1,056.62      | 528.81        | L   | 1,228.71      | 614.86 | 1,211.68 | 606.35 | 1,210.70 | 605.85        | 10    |
| 9  | 1,205.67        | 603.34        | 1,188.65 | 594.83 | 1,187.66      | 594.33        | M   | 1,115.63      | 558.32 | 1,098.60 | 549.80 | 1,097.61 | <b>549.31</b> | 9     |
| 10 | 1,276.71        | 638.86        | 1,259.68 | 630.35 | 1,258.70      | 629.85        | A   | 984.58        | 492.80 | 967.56   | 484.28 | 966.57   | 483.79        | 8     |
| 11 | 1,363.74        | 682.37        | 1,346.71 | 673.86 | 1,345.73      | 673.37        | S   | <b>913.55</b> | 457.28 | 896.52   | 448.76 | 895.54   | 448.27        | 7     |
| 12 | 1,476.83        | 738.92        | 1,459.80 | 730.40 | 1,458.81      | 729.91        | I   | 826.52        | 413.76 | 809.49   | 405.25 | 808.50   | 404.76        | 6     |
| 13 | 1,573.88        | 787.44        | 1,556.85 | 778.93 | 1,555.87      | 778.44        | P   | <b>713.43</b> | 357.22 | 696.40   | 348.71 | 695.42   | 348.21        | 5     |

|    |          |        |          |        |          |        |   |        |        |        |        |        |        |   |
|----|----------|--------|----------|--------|----------|--------|---|--------|--------|--------|--------|--------|--------|---|
| 14 | 1,686.96 | 843.98 | 1,669.94 | 835.47 | 1,668.95 | 834.98 | L | 616.38 | 308.69 | 599.35 | 300.18 | 598.37 | 299.69 | 4 |
| 15 | 1,784.01 | 892.51 | 1,766.99 | 884.00 | 1,766.00 | 883.51 | P | 503.29 | 252.15 | 486.27 | 243.64 | 485.28 | 243.15 | 3 |
| 16 | 1,899.04 | 950.02 | 1,882.02 | 941.51 | 1,881.03 | 941.02 | D | 406.24 | 203.62 | 389.22 | 195.11 | 388.23 | 194.62 | 2 |
| 17 |          |        |          |        |          |        | K | 291.21 | 146.11 | 274.19 | 137.60 |        |        | 1 |

Query 2241 Hit 1

MS/MS Fragmentation of **EGKPHLVLGLLWQIHK**

Found in **sp|Q14651|PLSI\_HUMAN**, Plastin-1 OS=Homo sapiens GN=PLS1 PE=1 SV=2

Match to Query 2241: 2276.322from(759.7813,3+)

Title: 801: Scan 2111 (rt=55.8202, f=2, i=330) [D:\lab212\membrane\Grace\20120214\_iTRAQ\_2.raw]

Data File:

**Monoisotopic mass of neutral peptide Mr(calc): 2276.322**

**Variable modifications:**

**K3** :iTRAQ4plex (K)

**Q13** :Deamidated (NQ)

**K16** :iTRAQ4plex (K)

**Ions Score: 41.17 Expect: 0.025**

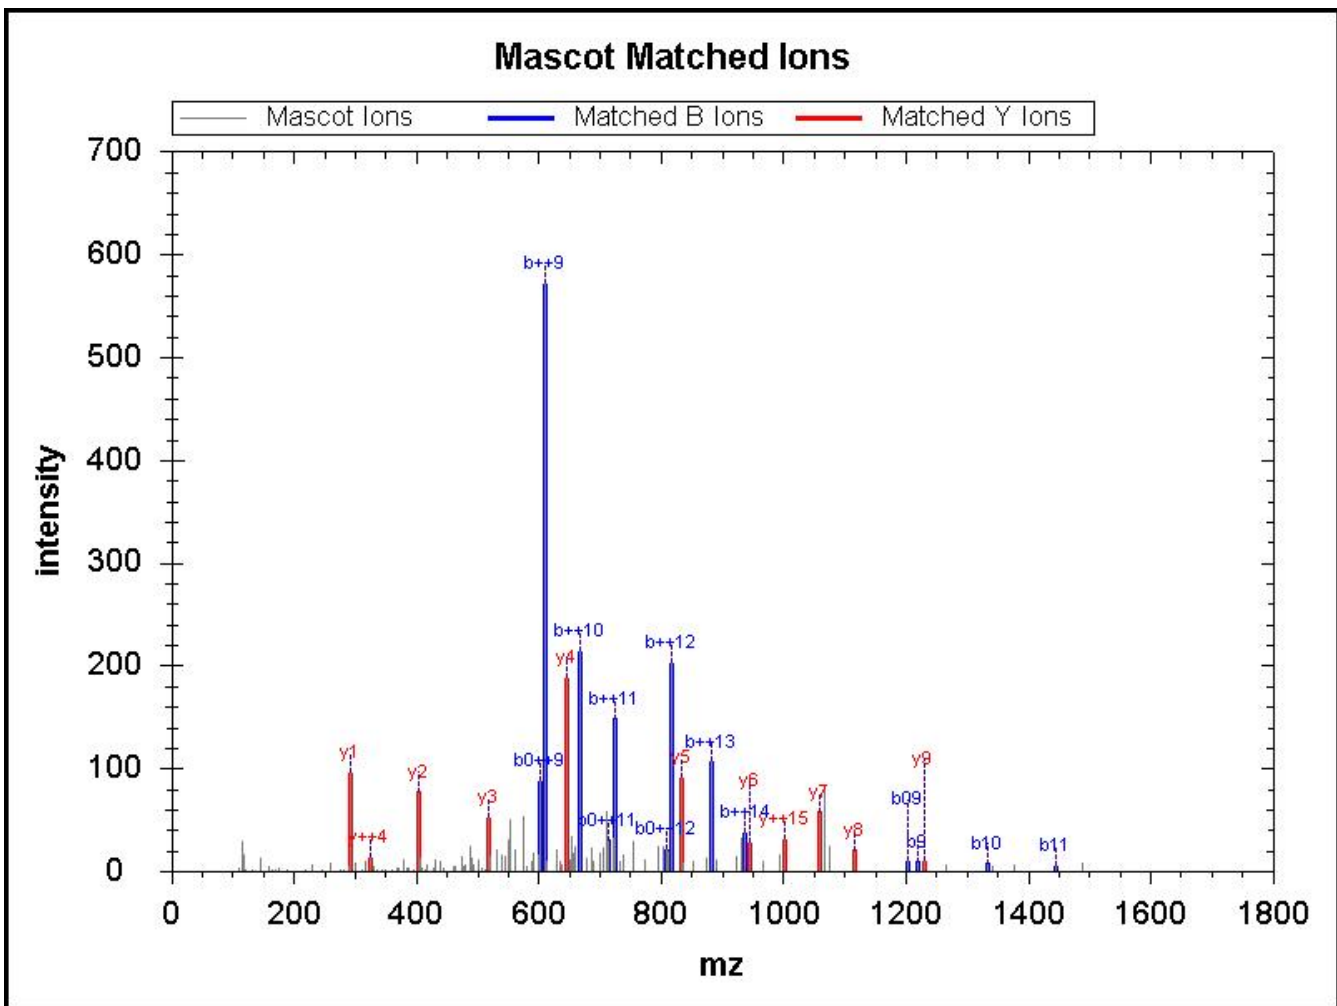

| No | b        | b++    | b*       | b*++   | b0       | b0++   | Seq | y        | y++      | y*       | y*++   | RevNo |
|----|----------|--------|----------|--------|----------|--------|-----|----------|----------|----------|--------|-------|
| 1  | 274.15   | 137.58 |          |        | 256.14   | 128.57 | E   |          |          |          |        | 16    |
| 2  | 331.17   | 166.09 |          |        | 313.16   | 157.09 | G   | 2,004.26 | 1,002.63 | 1,987.23 | 994.12 | 15    |
| 3  | 603.37   | 302.19 | 586.34   | 293.68 | 585.36   | 293.18 | K   | 1,947.24 | 974.12   | 1,930.21 | 965.61 | 14    |
| 4  | 700.42   | 350.72 | 683.40   | 342.20 | 682.41   | 341.71 | P   | 1,675.04 | 838.03   | 1,658.02 | 829.51 | 13    |
| 5  | 837.48   | 419.24 | 820.46   | 410.73 | 819.47   | 410.24 | H   | 1,577.99 | 789.50   | 1,560.96 | 780.99 | 12    |
| 6  | 950.57   | 475.79 | 933.54   | 467.27 | 932.56   | 466.78 | L   | 1,440.93 | 720.97   | 1,423.90 | 712.46 | 11    |
| 7  | 1,049.63 | 525.32 | 1,032.61 | 516.81 | 1,031.62 | 516.32 | V   | 1,327.85 | 664.43   | 1,310.82 | 655.91 | 10    |
| 8  | 1,162.72 | 581.86 | 1,145.69 | 573.35 | 1,144.71 | 572.86 | L   | 1,228.78 | 614.89   | 1,211.75 | 606.38 | 9     |

|    |          |        |          |        |          |        |   |          |        |          |        |   |
|----|----------|--------|----------|--------|----------|--------|---|----------|--------|----------|--------|---|
| 9  | 1,219.74 | 610.37 | 1,202.71 | 601.86 | 1,201.73 | 601.37 | G | 1,115.69 | 558.35 | 1,098.67 | 549.84 | 8 |
| 10 | 1,332.82 | 666.92 | 1,315.80 | 658.40 | 1,314.81 | 657.91 | L | 1,058.67 | 529.84 | 1,041.65 | 521.33 | 7 |
| 11 | 1,445.91 | 723.46 | 1,428.88 | 714.94 | 1,427.90 | 714.45 | L | 945.59   | 473.30 | 928.56   | 464.78 | 6 |
| 12 | 1,631.99 | 816.50 | 1,614.96 | 807.98 | 1,613.98 | 807.49 | W | 832.50   | 416.76 | 815.48   | 408.24 | 5 |
| 13 | 1,761.03 | 881.02 | 1,744.00 | 872.51 | 1,743.02 | 872.01 | Q | 646.43   | 323.72 | 629.40   | 315.20 | 4 |
| 14 | 1,874.11 | 937.56 | 1,857.09 | 929.05 | 1,856.10 | 928.56 | I | 517.38   | 259.20 | 500.36   | 250.68 | 3 |
| 15 | 1,987.20 | 994.10 | 1,970.17 | 985.59 | 1,969.19 | 985.10 | I | 404.30   | 202.65 | 387.27   | 194.14 | 2 |
| 16 |          |        |          |        |          |        | K | 291.21   | 146.11 | 274.19   | 137.60 | 1 |

Query 278 Hit 1

MS/MS Fragmentation of **RIQDLER**

Found in **sp|Q6ZQ06|QN1\_MOUSE**, Protein QN1 homolog OS=Mus musculus GN=Kiaa1009 PE=1 SV=2

Match to Query 278: 1073.595from(358.8724,3+)

Title: 202: Scan 858 (rt=27.5877, f=2, i=128) [D:\lab212\membrane\Grace\20120214\_iTRAQ\_2.raw]

Data File:

**Monoisotopic mass of neutral peptide Mr(calc): 1073.595**

**Variable modifications:**

**Q3** :Deamidated (NQ)

**Ions Score: 41.27 Expect: 0.058**

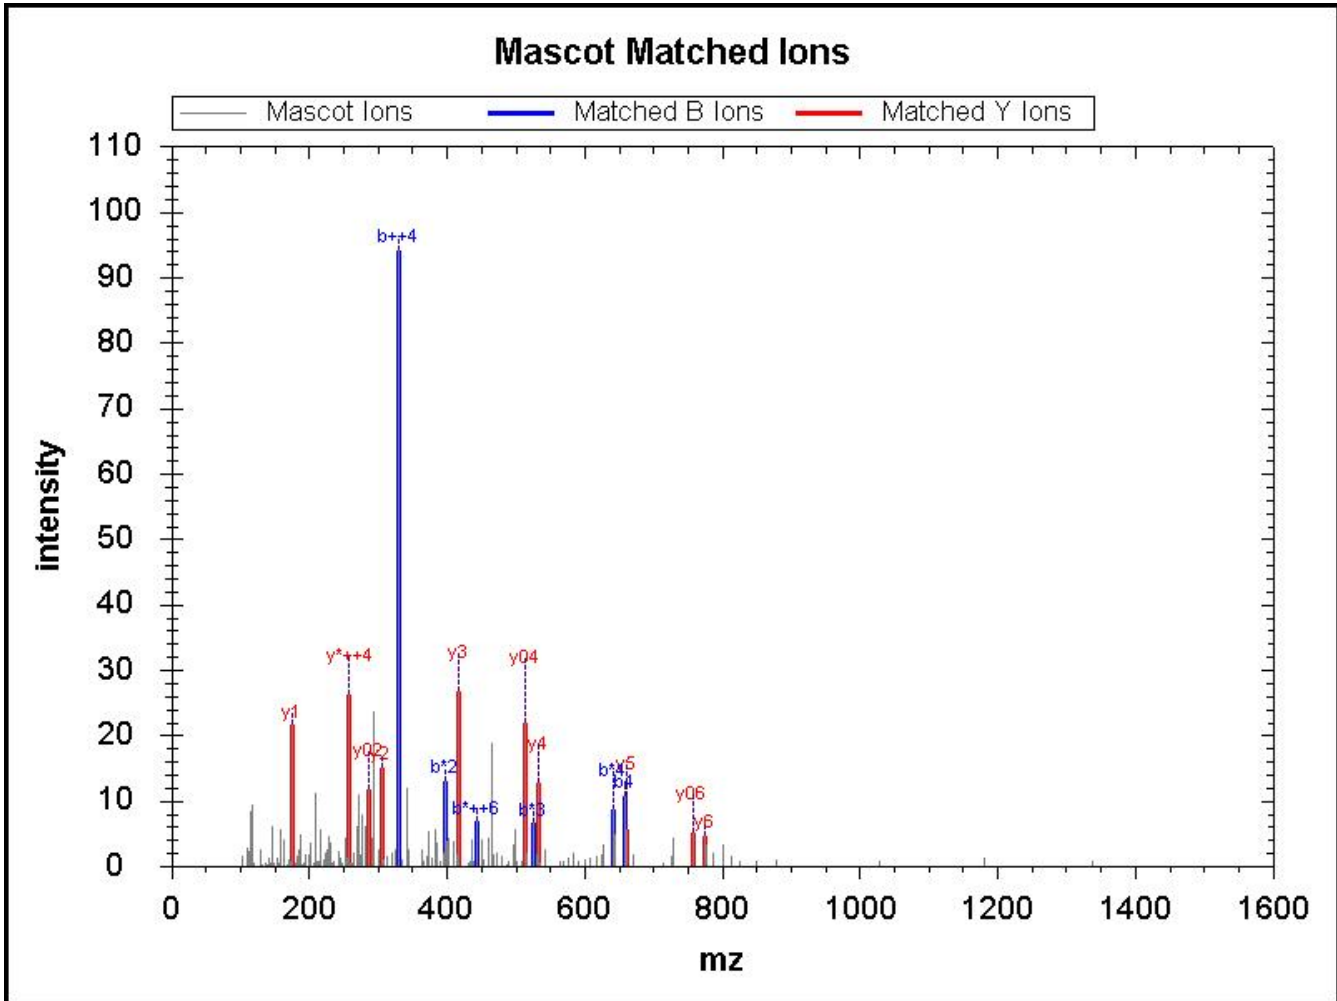

| No | b      | b++    | b*     | b*++   | b0     | b0++   | Seq | y      | y++    | y*     | y*++   | y0     | y0++   | RevNo |
|----|--------|--------|--------|--------|--------|--------|-----|--------|--------|--------|--------|--------|--------|-------|
| 1  | 301.21 | 151.11 | 284.18 | 142.60 |        |        | R   |        |        |        |        |        |        | 7     |
| 2  | 414.29 | 207.65 | 397.27 | 199.14 |        |        | I   | 774.40 | 387.70 | 757.37 | 379.19 | 756.39 | 378.70 | 6     |
| 3  | 543.34 | 272.17 | 526.31 | 263.66 |        |        | Q   | 661.32 | 331.16 | 644.29 | 322.65 | 643.30 | 322.16 | 5     |
| 4  | 658.36 | 329.69 | 641.34 | 321.17 | 640.35 | 320.68 | D   | 532.27 | 266.64 | 515.25 | 258.13 | 514.26 | 257.63 | 4     |
| 5  | 771.45 | 386.23 | 754.42 | 377.71 | 753.44 | 377.22 | L   | 417.25 | 209.13 | 400.22 | 200.61 | 399.24 | 200.12 | 3     |

|   |        |        |        |        |        |        |   |        |        |        |        |        |        |   |
|---|--------|--------|--------|--------|--------|--------|---|--------|--------|--------|--------|--------|--------|---|
| 6 | 900.49 | 450.75 | 883.46 | 442.24 | 882.48 | 441.74 | E | 304.16 | 152.58 | 287.13 | 144.07 | 286.15 | 143.58 | 2 |
| 7 |        |        |        |        |        |        | R | 175.12 | 88.06  | 158.09 | 79.55  |        |        | 1 |

Query 849 Hit 1

MS/MS Fragmentation of **LWTLVSEQTR**

Found in **sp|P46776|RL27A\_HUMAN**, 60S ribosomal protein L27a OS=Homo sapiens GN=RPL27A PE=1 SV=2

Match to Query 849: 1375.76from(688.8874,2+)

Title: 731: Scan 1963 (rt=52.4888, f=3, i=271) [D:\lab212\membrane\Grace\20120214\_iTRAQ\_2.raw]

Data File:

**Monoisotopic mass of neutral peptide Mr(calc): 1375.76**

**Variable modifications:**

**Ions Score: 42.32 Expect: 0.050**

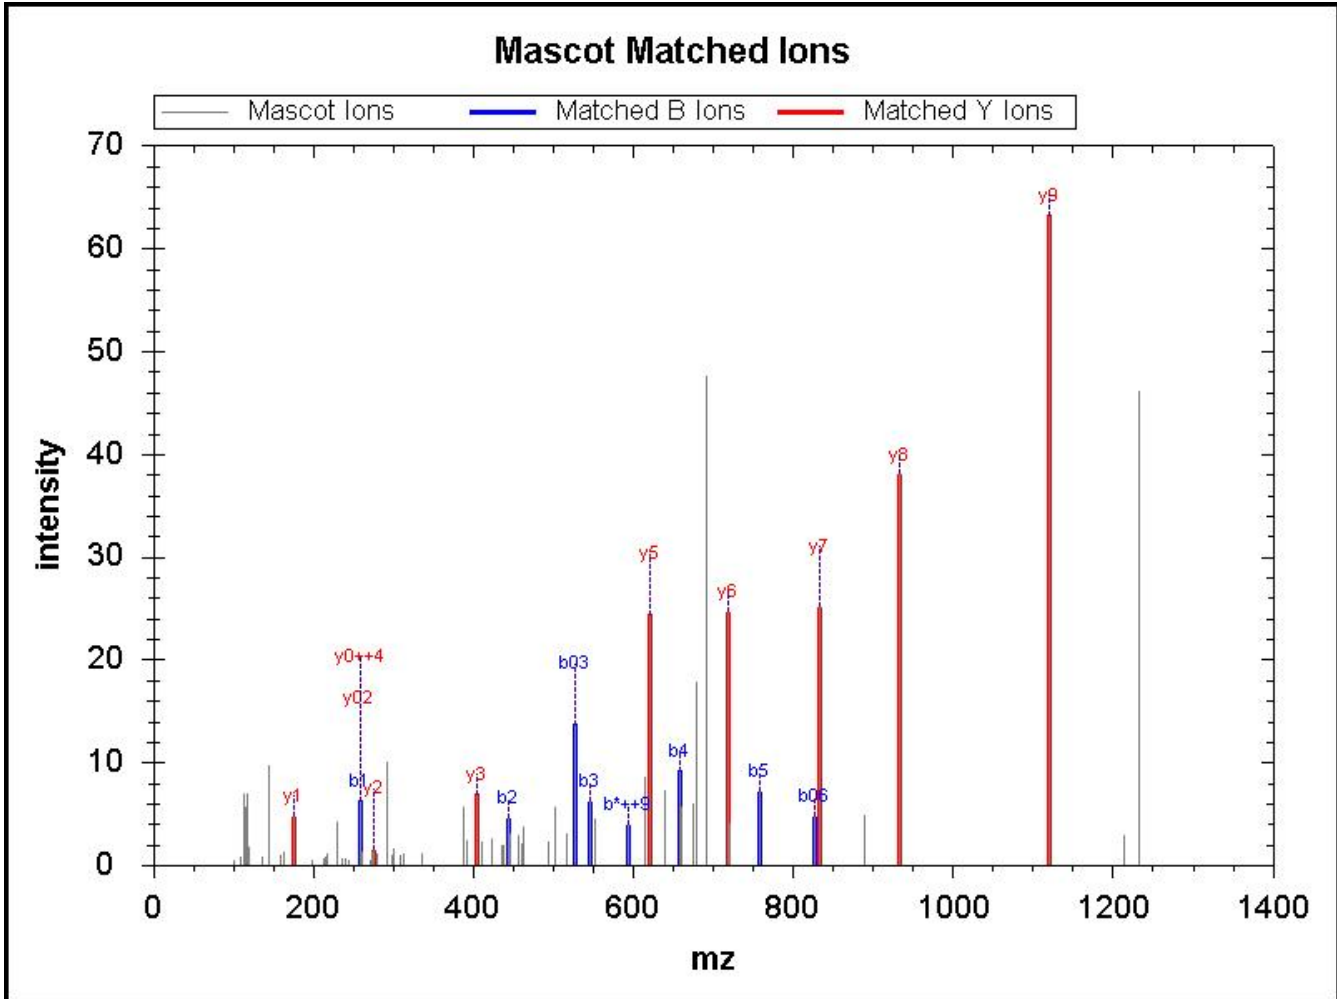

| No | b        | b++    | b*       | b*++   | b0       | b0++   | Seq | y        | y++    | y*       | y*++   | y0       | y0++   | RevNo |
|----|----------|--------|----------|--------|----------|--------|-----|----------|--------|----------|--------|----------|--------|-------|
| 1  | 258.19   | 129.60 |          |        |          |        | L   |          |        |          |        |          |        | 10    |
| 2  | 444.27   | 222.64 |          |        |          |        | W   | 1,119.58 | 560.29 | 1,102.55 | 551.78 | 1,101.57 | 551.29 | 9     |
| 3  | 545.32   | 273.16 |          |        | 527.31   | 264.16 | T   | 933.50   | 467.25 | 916.47   | 458.74 | 915.49   | 458.25 | 8     |
| 4  | 658.40   | 329.71 |          |        | 640.39   | 320.70 | L   | 832.45   | 416.73 | 815.43   | 408.22 | 814.44   | 407.72 | 7     |
| 5  | 757.47   | 379.24 |          |        | 739.46   | 370.23 | V   | 719.37   | 360.19 | 702.34   | 351.67 | 701.36   | 351.18 | 6     |
| 6  | 844.50   | 422.76 |          |        | 826.49   | 413.75 | S   | 620.30   | 310.65 | 603.27   | 302.14 | 602.29   | 301.65 | 5     |
| 7  | 973.55   | 487.28 |          |        | 955.54   | 478.27 | E   | 533.27   | 267.14 | 516.24   | 258.62 | 515.26   | 258.13 | 4     |
| 8  | 1,101.61 | 551.31 | 1,084.58 | 542.79 | 1,083.60 | 542.30 | Q   | 404.23   | 202.62 | 387.20   | 194.10 | 386.21   | 193.61 | 3     |
| 9  | 1,202.65 | 601.83 | 1,185.63 | 593.32 | 1,184.64 | 592.83 | T   | 276.17   | 138.59 | 259.14   | 130.07 | 258.16   | 129.58 | 2     |
| 10 |          |        |          |        |          |        | R   | 175.12   | 88.06  | 158.09   | 79.55  |          |        | 1     |

Query 2257 Hit 1

MS/MS Fragmentation of **NVGNAILYETVLTIMDIK**

Found in **sp|O43747|APIG1\_HUMAN**, AP-1 complex subunit gamma-1 OS=Homo sapiens GN=APIG1 PE=1 SV=5

Match to Query 2257: 2294.279from(765.7671,3+)

Title: 1384: Sum of 2 scans in range 3354 (rt=83.8282, f=4, i=927) to 3355 (rt=83.8536, f=4, i=928)

[D:\lab212\membrane\Grace\20120214\_iTRAQ\_2.raw]

Data File:

**Monoisotopic mass of neutral peptide Mr(calc): 2294.279**

**Variable modifications:**

**K18** iTRAQ4plex (K)

**Ions Score: 42.43 Expect: 0.032**

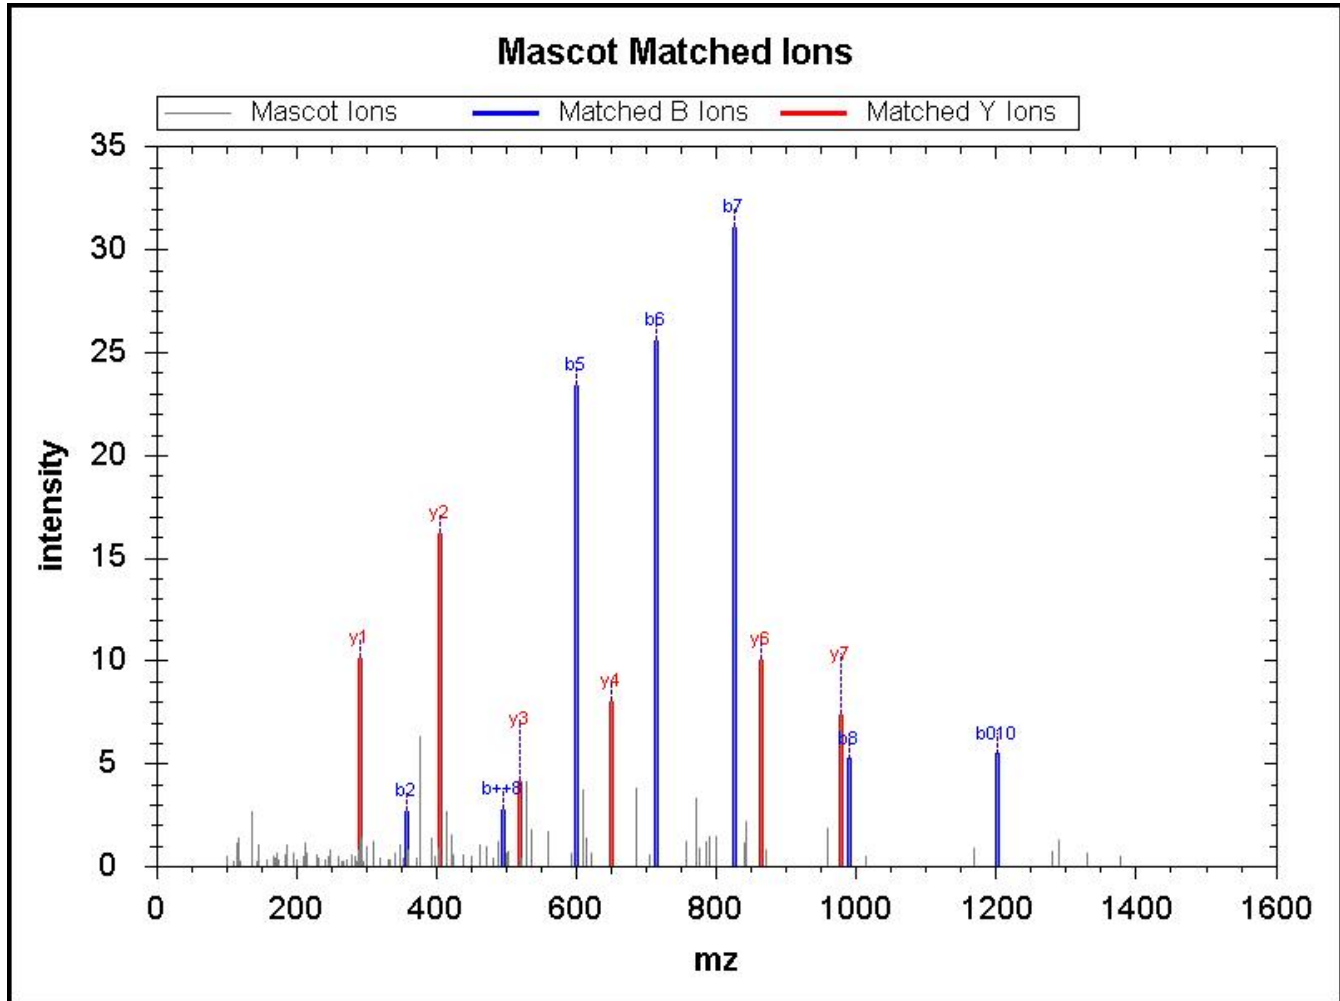

| No | b             | b++           | b*       | b*++   | b0              | b0++   | Seq | y             | y++      | y*       | y*++     | y0       | y0++     | RevNo |
|----|---------------|---------------|----------|--------|-----------------|--------|-----|---------------|----------|----------|----------|----------|----------|-------|
| 1  | 259.15        | 130.08        | 242.13   | 121.57 |                 |        | N   |               |          |          |          |          |          | 18    |
| 2  | <b>358.22</b> | 179.61        | 341.19   | 171.10 |                 |        | V   | 2,037.14      | 1,019.07 | 2,020.12 | 1,010.56 | 2,019.13 | 1,010.07 | 17    |
| 3  | 415.24        | 208.12        | 398.22   | 199.61 |                 |        | G   | 1,938.07      | 969.54   | 1,921.05 | 961.03   | 1,920.06 | 960.54   | 16    |
| 4  | 529.29        | 265.15        | 512.26   | 256.63 |                 |        | N   | 1,881.05      | 941.03   | 1,864.03 | 932.52   | 1,863.04 | 932.02   | 15    |
| 5  | <b>600.32</b> | 300.66        | 583.30   | 292.15 |                 |        | A   | 1,767.01      | 884.01   | 1,749.98 | 875.50   | 1,749.00 | 875.00   | 14    |
| 6  | <b>713.41</b> | 357.21        | 696.38   | 348.69 |                 |        | I   | 1,695.97      | 848.49   | 1,678.95 | 839.98   | 1,677.96 | 839.48   | 13    |
| 7  | <b>826.49</b> | 413.75        | 809.46   | 405.24 |                 |        | L   | 1,582.89      | 791.95   | 1,565.86 | 783.43   | 1,564.88 | 782.94   | 12    |
| 8  | <b>989.55</b> | <b>495.28</b> | 972.53   | 486.77 |                 |        | Y   | 1,469.80      | 735.41   | 1,452.78 | 726.89   | 1,451.79 | 726.40   | 11    |
| 9  | 1,118.60      | 559.80        | 1,101.57 | 551.29 | 1,100.59        | 550.80 | E   | 1,306.74      | 653.87   | 1,289.71 | 645.36   | 1,288.73 | 644.87   | 10    |
| 10 | 1,219.64      | 610.33        | 1,202.62 | 601.81 | <b>1,201.63</b> | 601.32 | T   | 1,177.70      | 589.35   | 1,160.67 | 580.84   | 1,159.69 | 580.35   | 9     |
| 11 | 1,318.71      | 659.86        | 1,301.69 | 651.35 | 1,300.70        | 650.85 | V   | 1,076.65      | 538.83   | 1,059.62 | 530.32   | 1,058.64 | 529.82   | 8     |
| 12 | 1,431.80      | 716.40        | 1,414.77 | 707.89 | 1,413.79        | 707.40 | L   | <b>977.58</b> | 489.29   | 960.56   | 480.78   | 959.57   | 480.29   | 7     |
| 13 | 1,532.84      | 766.93        | 1,515.82 | 758.41 | 1,514.83        | 757.92 | T   | <b>864.50</b> | 432.75   | 847.47   | 424.24   | 846.49   | 423.75   | 6     |
| 14 | 1,645.93      | 823.47        | 1,628.90 | 814.95 | 1,627.92        | 814.46 | I   | 763.45        | 382.23   | 746.42   | 373.72   | 745.44   | 373.22   | 5     |
| 15 | 1,776.97      | 888.99        | 1,759.94 | 880.47 | 1,758.96        | 879.98 | M   | <b>650.37</b> | 325.69   | 633.34   | 317.17   | 632.36   | 316.68   | 4     |

|    |          |          |          |        |          |        |   |        |        |        |        |        |        |   |
|----|----------|----------|----------|--------|----------|--------|---|--------|--------|--------|--------|--------|--------|---|
| 16 | 1,892.00 | 946.50   | 1,874.97 | 937.99 | 1,873.99 | 937.50 | D | 519.33 | 260.17 | 502.30 | 251.65 | 501.32 | 251.16 | 3 |
| 17 | 2,005.08 | 1,003.04 | 1,988.05 | 994.53 | 1,987.07 | 994.04 | I | 404.30 | 202.65 | 387.27 | 194.14 |        |        | 2 |
| 18 |          |          |          |        |          |        | K | 291.21 | 146.11 | 274.19 | 137.60 |        |        | 1 |

Query 1845 Hit 1

MS/MS Fragmentation of **KLDLEAWFPGSGAFR**

Found in **sp|P49591|SYSC\_HUMAN**, Serine--tRNA ligase

Match to Query 1845: 1981.071 from (661.3644,3+)

Title: 902: Sum of 2 scans in range 2361 (rt=61.3745, f=4, i=614) to 2362 (rt=61.3999, f=4, i=615)

[D:\lab212\membrane\Grace\20120214\_iTRAQ\_1.raw]

Data File:

**Monoisotopic mass of neutral peptide Mr(calc):** 1981.071

**Variable modifications:**

**K1** iTRAQ4plex (K)

**Ions Score:** 42.63 **Expect:** 0.044

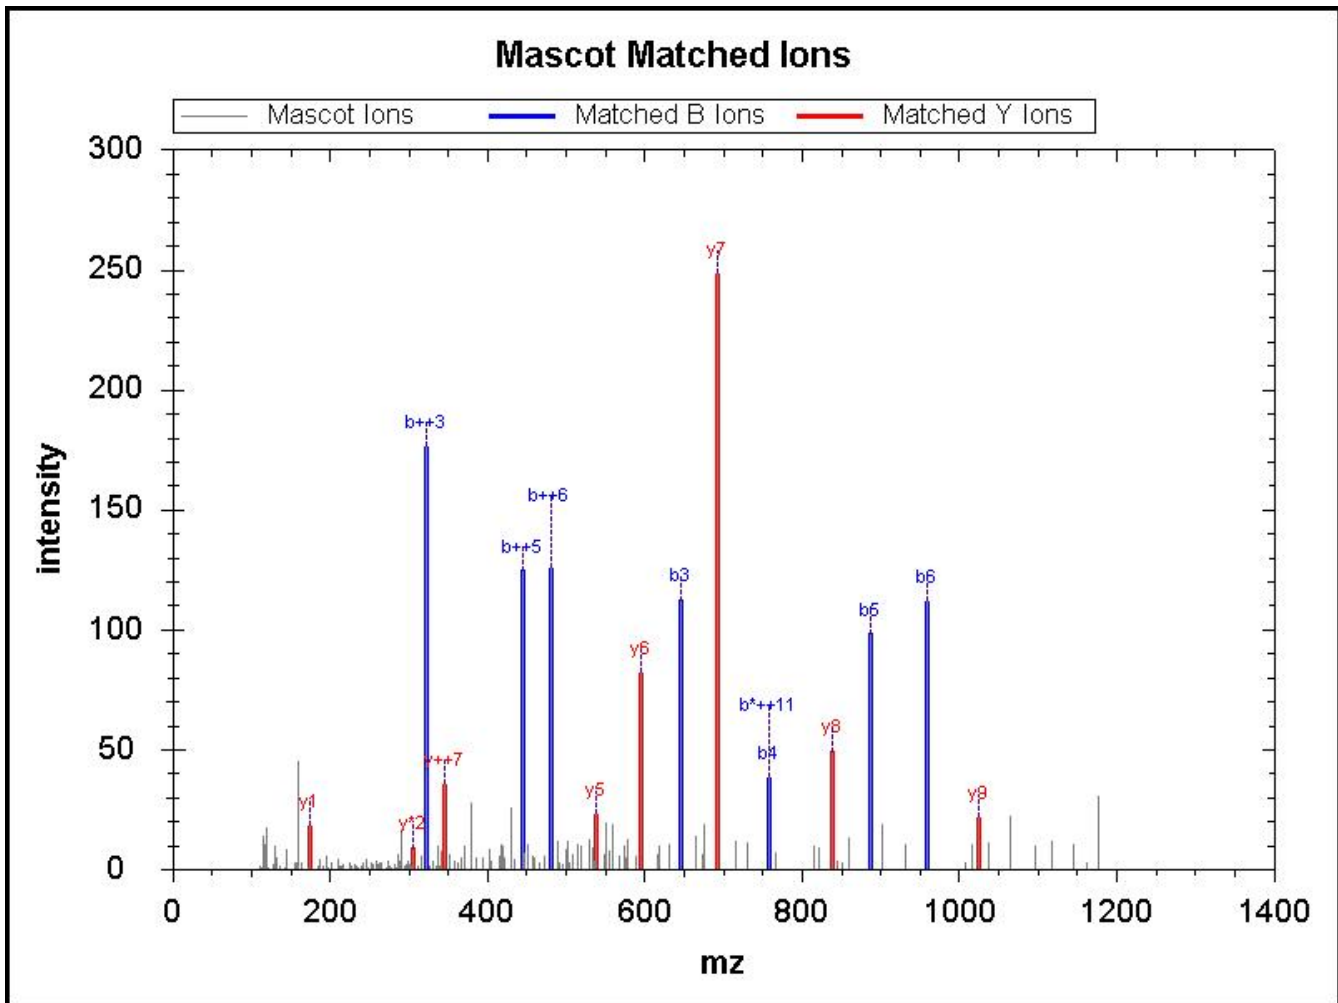

| No | b        | b++    | b*       | b*++   | b0       | b0++   | Seq | y        | y++    | y*       | y*++   | y0       | y0++   | RevNo |
|----|----------|--------|----------|--------|----------|--------|-----|----------|--------|----------|--------|----------|--------|-------|
| 1  | 417.31   | 209.16 | 400.28   | 200.64 |          |        | K   |          |        |          |        |          |        | 15    |
| 2  | 530.39   | 265.70 | 513.36   | 257.19 |          |        | L   | 1,565.77 | 783.39 | 1,548.75 | 774.88 | 1,547.76 | 774.39 | 14    |
| 3  | 645.42   | 323.21 | 628.39   | 314.70 | 627.41   | 314.21 | D   | 1,452.69 | 726.85 | 1,435.66 | 718.34 | 1,434.68 | 717.84 | 13    |
| 4  | 758.50   | 379.75 | 741.47   | 371.24 | 740.49   | 370.75 | L   | 1,337.66 | 669.34 | 1,320.64 | 660.82 | 1,319.65 | 660.33 | 12    |
| 5  | 887.54   | 444.28 | 870.52   | 435.76 | 869.53   | 435.27 | E   | 1,224.58 | 612.79 | 1,207.55 | 604.28 | 1,206.57 | 603.79 | 11    |
| 6  | 958.58   | 479.79 | 941.55   | 471.28 | 940.57   | 470.79 | A   | 1,095.54 | 548.27 | 1,078.51 | 539.76 | 1,077.53 | 539.27 | 10    |
| 7  | 1,144.66 | 572.83 | 1,127.63 | 564.32 | 1,126.65 | 563.83 | W   | 1,024.50 | 512.75 | 1,007.47 | 504.24 | 1,006.49 | 503.75 | 9     |
| 8  | 1,291.73 | 646.37 | 1,274.70 | 637.85 | 1,273.72 | 637.36 | F   | 838.42   | 419.71 | 821.39   | 411.20 | 820.41   | 410.71 | 8     |
| 9  | 1,388.78 | 694.89 | 1,371.76 | 686.38 | 1,370.77 | 685.89 | P   | 691.35   | 346.18 | 674.33   | 337.67 | 673.34   | 337.17 | 7     |
| 10 | 1,445.80 | 723.41 | 1,428.78 | 714.89 | 1,427.79 | 714.40 | G   | 594.30   | 297.65 | 577.27   | 289.14 | 576.29   | 288.65 | 6     |

|    |          |        |          |        |          |        |   |        |        |        |        |        |        |   |
|----|----------|--------|----------|--------|----------|--------|---|--------|--------|--------|--------|--------|--------|---|
| 11 | 1,532.83 | 766.92 | 1,515.81 | 758.41 | 1,514.82 | 757.92 | S | 537.28 | 269.14 | 520.25 | 260.63 | 519.27 | 260.14 | 5 |
| 12 | 1,589.86 | 795.43 | 1,572.83 | 786.92 | 1,571.85 | 786.43 | G | 450.25 | 225.63 | 433.22 | 217.11 |        |        | 4 |
| 13 | 1,660.89 | 830.95 | 1,643.87 | 822.44 | 1,642.88 | 821.95 | A | 393.22 | 197.12 | 376.20 | 188.60 |        |        | 3 |
| 14 | 1,807.96 | 904.48 | 1,790.94 | 895.97 | 1,789.95 | 895.48 | F | 322.19 | 161.60 | 305.16 | 153.08 |        |        | 2 |
| 15 |          |        |          |        |          |        | R | 175.12 | 88.06  | 158.09 | 79.55  |        |        | 1 |

Query 1008 Hit 1

MS/MS Fragmentation of **VMVQPINLIFR**

Found in **sp|P62304|RUXE\_HUMAN**, Small nuclear ribonucleoprotein E OS=Homo sapiens GN=SNRPE PE=1 SV=1

Match to Query 1008: 1472.866from(737.4403,2+)

Title: 955: Scan 2471 (rt=63.852, f=3, i=340) [D:\lab212\membrane\Grace\20120214\_iTRAQ\_1.raw]

Data File:

**Monoisotopic mass of neutral peptide Mr(calc): 1472.866**

**Variable modifications:**

**Ions Score: 42.72 Expect: 0.032**

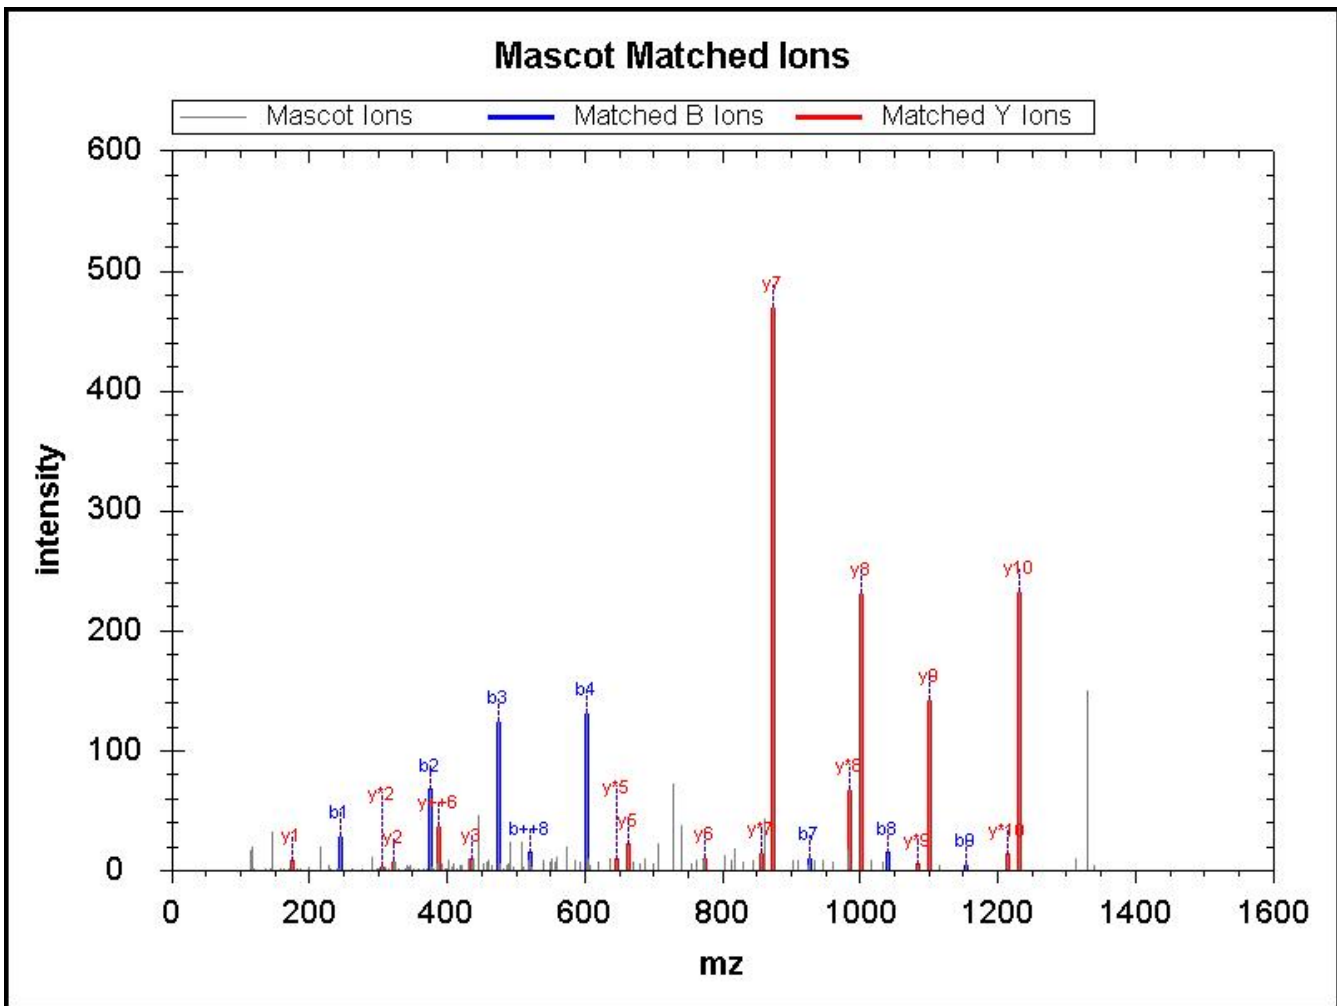

| No | b        | b++    | b*       | b*++   | Seq | y        | y++    | y*       | y*++   | RevNo |
|----|----------|--------|----------|--------|-----|----------|--------|----------|--------|-------|
| 1  | 244.18   | 122.59 |          |        | V   |          |        |          |        | 11    |
| 2  | 375.22   | 188.11 |          |        | M   | 1,230.70 | 615.85 | 1,213.68 | 607.34 | 10    |
| 3  | 474.29   | 237.65 |          |        | V   | 1,099.66 | 550.33 | 1,082.64 | 541.82 | 9     |
| 4  | 602.35   | 301.68 | 585.32   | 293.16 | Q   | 1,000.59 | 500.80 | 983.57   | 492.29 | 8     |
| 5  | 699.40   | 350.20 | 682.37   | 341.69 | P   | 872.54   | 436.77 | 855.51   | 428.26 | 7     |
| 6  | 812.48   | 406.74 | 795.46   | 398.23 | I   | 775.48   | 388.24 | 758.46   | 379.73 | 6     |
| 7  | 926.52   | 463.77 | 909.50   | 455.25 | N   | 662.40   | 331.70 | 645.37   | 323.19 | 5     |
| 8  | 1,039.61 | 520.31 | 1,022.58 | 511.79 | L   | 548.36   | 274.68 | 531.33   | 266.17 | 4     |
| 9  | 1,152.69 | 576.85 | 1,135.67 | 568.34 | I   | 435.27   | 218.14 | 418.24   | 209.63 | 3     |



|    |          |        |          |        |   |        |        |        |        |   |
|----|----------|--------|----------|--------|---|--------|--------|--------|--------|---|
| 10 | 1,299.76 | 650.38 | 1,282.74 | 641.87 | F | 322.19 | 161.60 | 305.16 | 153.08 | 2 |
| 11 |          |        |          |        | R | 175.12 | 88.06  | 158.09 | 79.55  | 1 |

Query 2359 Hit 1

MS/MS Fragmentation of **DMEALLPLMNMVIYSIDK**

Found in **sp|Q96A33|CCD47\_HUMAN**, Coiled-coil domain-containing protein 47 OS=Homo sapiens GN=CCDC47 PE=1 SV=1

Match to Query 2359: 2383.238from(795.42,3+)

Title: 1415: Scan 3499 (rt=86.9833, f=3, i=509) [D:\lab212\membrane\Grace\20120214\_iTRAQ\_1.raw]

Data File:

**Monoisotopic mass of neutral peptide Mr(calc):** 2383.238

**Variable modifications:**

**K18** :iTRAQ4plex (K)

**Ions Score:** 42.94 **Expect:** 0.046

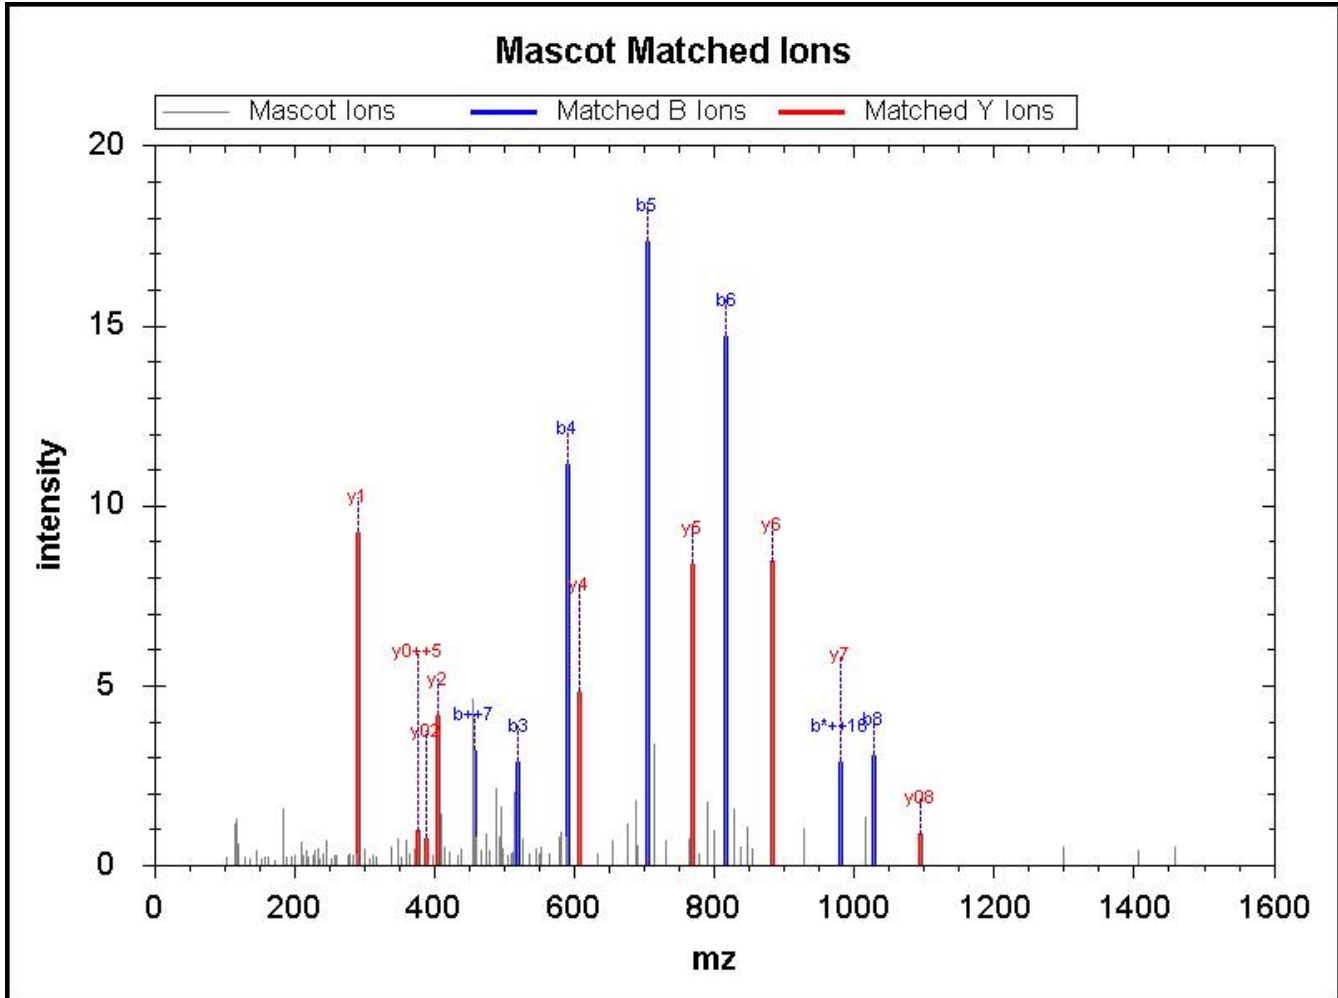

| No | b        | b++    | b*       | b*++   | b0       | b0++   | Seq | y        | y++      | y*       | y*++     | y0       | y0++     | RevNo |
|----|----------|--------|----------|--------|----------|--------|-----|----------|----------|----------|----------|----------|----------|-------|
| 1  | 260.14   | 130.57 |          |        | 242.13   | 121.57 | D   |          |          |          |          |          |          | 18    |
| 2  | 391.18   | 196.09 |          |        | 373.17   | 187.09 | M   | 2,125.12 | 1,063.07 | 2,108.10 | 1,054.55 | 2,107.11 | 1,054.06 | 17    |
| 3  | 520.22   | 260.61 |          |        | 502.21   | 251.61 | E   | 1,994.08 | 997.54   | 1,977.06 | 989.03   | 1,976.07 | 988.54   | 16    |
| 4  | 591.26   | 296.13 |          |        | 573.25   | 287.13 | A   | 1,865.04 | 933.02   | 1,848.01 | 924.51   | 1,847.03 | 924.02   | 15    |
| 5  | 704.34   | 352.67 |          |        | 686.33   | 343.67 | L   | 1,794.00 | 897.51   | 1,776.98 | 888.99   | 1,775.99 | 888.50   | 14    |
| 6  | 817.42   | 409.22 |          |        | 799.41   | 400.21 | L   | 1,680.92 | 840.96   | 1,663.89 | 832.45   | 1,662.91 | 831.96   | 13    |
| 7  | 914.48   | 457.74 |          |        | 896.47   | 448.74 | P   | 1,567.83 | 784.42   | 1,550.81 | 775.91   | 1,549.82 | 775.42   | 12    |
| 8  | 1,027.56 | 514.28 |          |        | 1,009.55 | 505.28 | L   | 1,470.78 | 735.89   | 1,453.76 | 727.38   | 1,452.77 | 726.89   | 11    |
| 9  | 1,158.60 | 579.80 |          |        | 1,140.59 | 570.80 | M   | 1,357.70 | 679.35   | 1,340.67 | 670.84   | 1,339.69 | 670.35   | 10    |
| 10 | 1,272.65 | 636.83 | 1,255.62 | 628.31 | 1,254.63 | 627.82 | N   | 1,226.66 | 613.83   | 1,209.63 | 605.32   | 1,208.65 | 604.83   | 9     |
| 11 | 1,403.69 | 702.35 | 1,386.66 | 693.83 | 1,385.67 | 693.34 | M   | 1,112.61 | 556.81   | 1,095.59 | 548.30   | 1,094.60 | 547.81   | 8     |
| 12 | 1,502.75 | 751.88 | 1,485.73 | 743.37 | 1,484.74 | 742.88 | V   | 981.57   | 491.29   | 964.55   | 482.78   | 963.56   | 482.29   | 7     |

|    |          |          |          |          |          |          |   |        |        |        |        |        |        |   |
|----|----------|----------|----------|----------|----------|----------|---|--------|--------|--------|--------|--------|--------|---|
| 13 | 1,615.84 | 808.42   | 1,598.81 | 799.91   | 1,597.83 | 799.42   | I | 882.51 | 441.76 | 865.48 | 433.24 | 864.49 | 432.75 | 6 |
| 14 | 1,778.90 | 889.95   | 1,761.87 | 881.44   | 1,760.89 | 880.95   | Y | 769.42 | 385.21 | 752.39 | 376.70 | 751.41 | 376.21 | 5 |
| 15 | 1,865.93 | 933.47   | 1,848.91 | 924.96   | 1,847.92 | 924.47   | S | 606.36 | 303.68 | 589.33 | 295.17 | 588.35 | 294.68 | 4 |
| 16 | 1,979.02 | 990.01   | 1,961.99 | 981.50   | 1,961.01 | 981.01   | I | 519.33 | 260.17 | 502.30 | 251.65 | 501.32 | 251.16 | 3 |
| 17 | 2,094.04 | 1,047.53 | 2,077.02 | 1,039.01 | 2,076.03 | 1,038.52 | D | 406.24 | 203.62 | 389.22 | 195.11 | 388.23 | 194.62 | 2 |
| 18 |          |          |          |          |          |          | K | 291.21 | 146.11 | 274.19 | 137.60 |        |        | 1 |

Query 61 Hit 1

MS/MS Fragmentation of **SGLDGVK**

Found in **sp|Q9H0U9|TSYL1\_HUMAN**, Testis-specific Y-encoded-like protein 1 OS=Homo sapiens GN=TSPYL1 PE=1 SV=3

Match to Query 61: 818.5082from(410.2614,2+)

Title: 169: Scan 834 (rt=26.9606, f=2, i=124) [D:\lab212\membrane\Grace\20120214\_iTRAQ\_1.raw]

Data File:

**Monoisotopic mass of neutral peptide Mr(calc): 818.5082**

**Variable modifications:**

**K7** iTRAQ4plex (K)

**Ions Score: 43.07 Expect: 0.039**

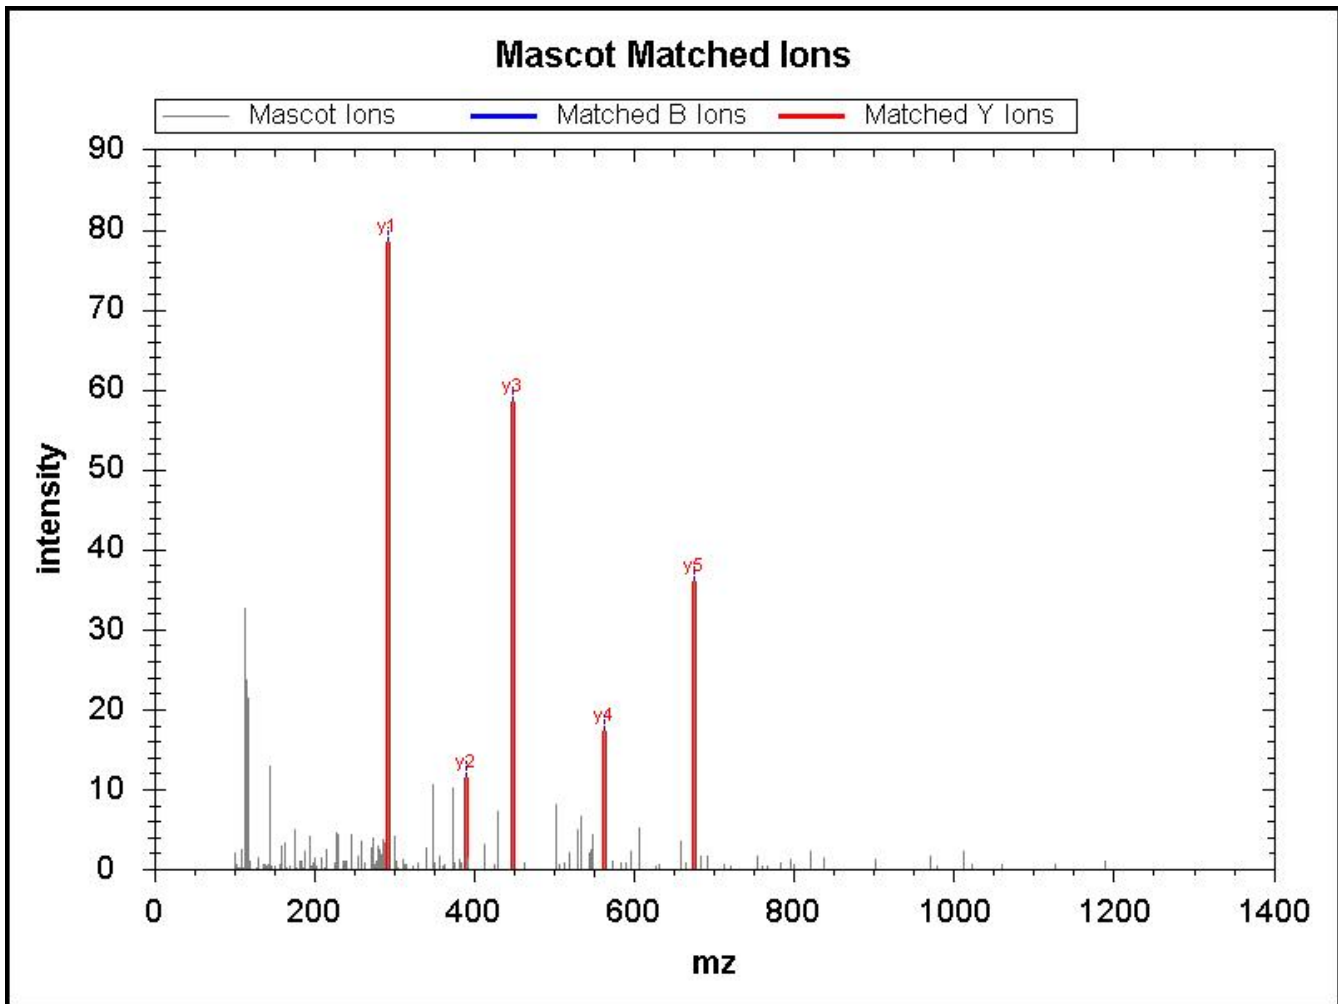

| No | b      | b++    | b0     | b0++   | Seq | y      | y++    | y*     | y*++   | y0     | y0++   | RevNo |
|----|--------|--------|--------|--------|-----|--------|--------|--------|--------|--------|--------|-------|
| 1  | 88.04  | 44.52  | 70.03  | 35.52  | S   |        |        |        |        |        |        | 7     |
| 2  | 145.06 | 73.03  | 127.05 | 64.03  | G   | 732.44 | 366.72 | 715.41 | 358.21 | 714.43 | 357.72 | 6     |
| 3  | 258.14 | 129.58 | 240.13 | 120.57 | L   | 675.42 | 338.21 | 658.39 | 329.70 | 657.41 | 329.21 | 5     |
| 4  | 373.17 | 187.09 | 355.16 | 178.08 | D   | 562.33 | 281.67 | 545.31 | 273.16 | 544.32 | 272.66 | 4     |
| 5  | 430.19 | 215.60 | 412.18 | 206.59 | G   | 447.30 | 224.16 | 430.28 | 215.64 |        |        | 3     |
| 6  | 529.26 | 265.13 | 511.25 | 256.13 | V   | 390.28 | 195.65 | 373.26 | 187.13 |        |        | 2     |
| 7  |        |        |        |        | K   | 291.21 | 146.11 | 274.19 | 137.60 |        |        | 1     |

Query 866 Hit 1

MS/MS Fragmentation of **AGNLGGGVVTIER**

Found in **sp|P35268|RL22\_HUMAN**, 60S ribosomal protein L22 OS=Homo sapiens GN=RPL22 PE=1 SV=2

Match to Query 866: 1385.774from(693.8942,2+)

Title: 414: Sum of 2 scans in range 1344 (rt=38.4592, f=4, i=286) to 1345 (rt=38.4846, f=4, i=287)

[D:\lab212\membrane\Grace\20120214\_iTRAQ\_1.raw]

Data File:

**Monoisotopic mass of neutral peptide Mr(calc): 1385.774**

**Variable modifications:**

**Ions Score: 43.07 Expect: 0.034**

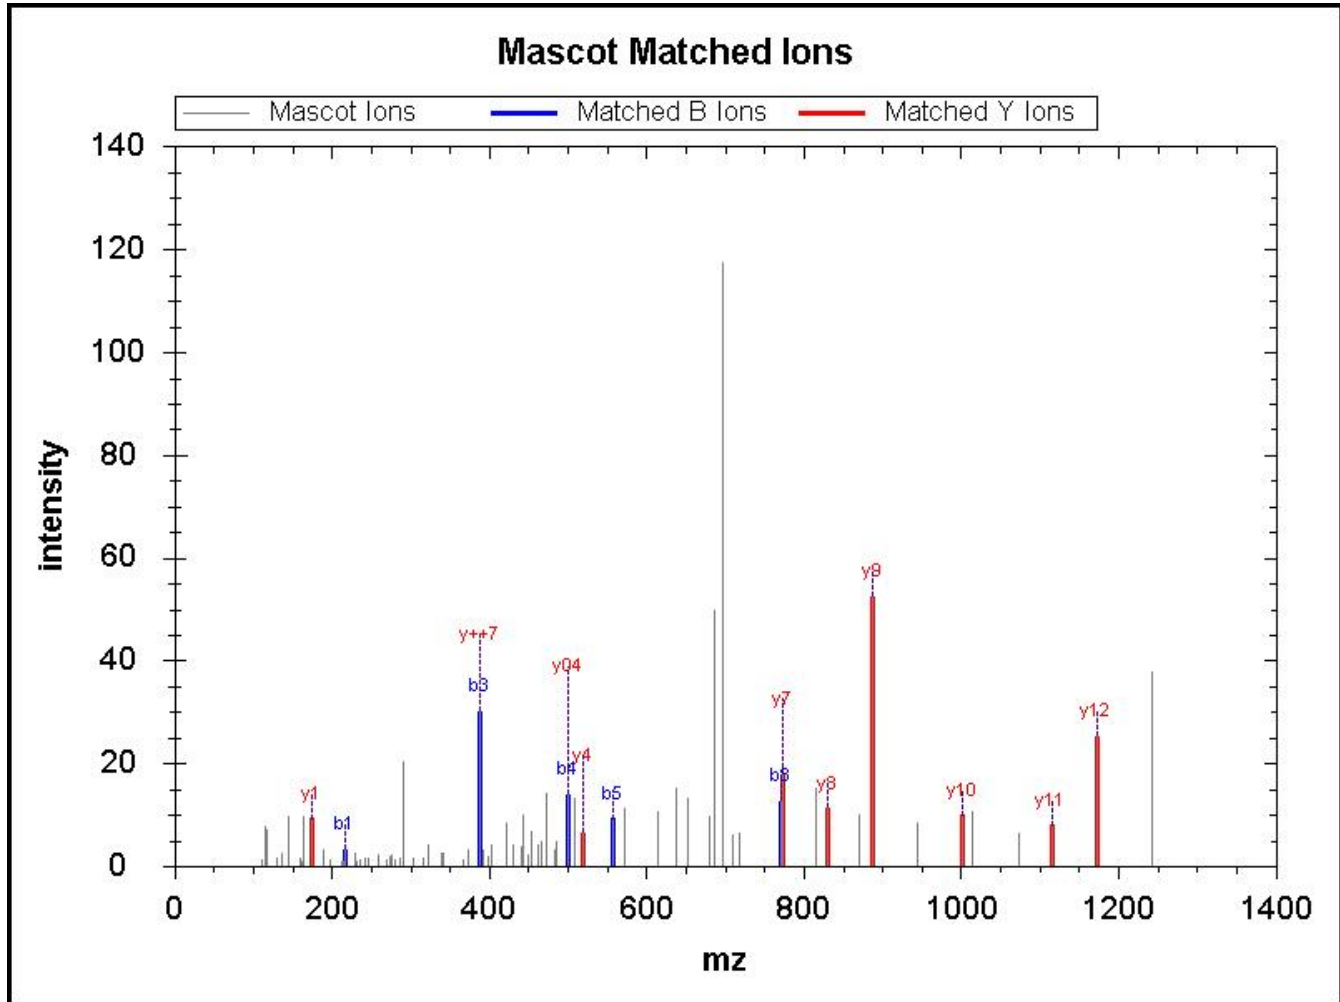

| No | b        | b++    | b*       | b*++   | b0       | b0++   | Seq | y        | y++    | y*       | y*++   | y0       | y0++   | RevNo |
|----|----------|--------|----------|--------|----------|--------|-----|----------|--------|----------|--------|----------|--------|-------|
| 1  | 216.15   | 108.58 |          |        |          |        | A   |          |        |          |        |          |        | 13    |
| 2  | 273.17   | 137.09 |          |        |          |        | G   | 1,171.64 | 586.33 | 1,154.62 | 577.81 | 1,153.63 | 577.32 | 12    |
| 3  | 387.21   | 194.11 | 370.18   | 185.60 |          |        | N   | 1,114.62 | 557.81 | 1,097.59 | 549.30 | 1,096.61 | 548.81 | 11    |
| 4  | 500.29   | 250.65 | 483.27   | 242.14 |          |        | L   | 1,000.58 | 500.79 | 983.55   | 492.28 | 982.57   | 491.79 | 10    |
| 5  | 557.32   | 279.16 | 540.29   | 270.65 |          |        | G   | 887.49   | 444.25 | 870.47   | 435.74 | 869.48   | 435.25 | 9     |
| 6  | 614.34   | 307.67 | 597.31   | 299.16 |          |        | G   | 830.47   | 415.74 | 813.45   | 407.23 | 812.46   | 406.73 | 8     |
| 7  | 671.36   | 336.18 | 654.33   | 327.67 |          |        | G   | 773.45   | 387.23 | 756.42   | 378.72 | 755.44   | 378.22 | 7     |
| 8  | 770.43   | 385.72 | 753.40   | 377.20 |          |        | V   | 716.43   | 358.72 | 699.40   | 350.21 | 698.42   | 349.71 | 6     |
| 9  | 869.50   | 435.25 | 852.47   | 426.74 |          |        | V   | 617.36   | 309.18 | 600.34   | 300.67 | 599.35   | 300.18 | 5     |
| 10 | 970.54   | 485.78 | 953.52   | 477.26 | 952.53   | 476.77 | T   | 518.29   | 259.65 | 501.27   | 251.14 | 500.28   | 250.64 | 4     |
| 11 | 1,083.63 | 542.32 | 1,066.60 | 533.80 | 1,065.62 | 533.31 | I   | 417.25   | 209.13 | 400.22   | 200.61 | 399.24   | 200.12 | 3     |
| 12 | 1,212.67 | 606.84 | 1,195.64 | 598.33 | 1,194.66 | 597.83 | E   | 304.16   | 152.58 | 287.13   | 144.07 | 286.15   | 143.58 | 2     |
| 13 |          |        |          |        |          |        | R   | 175.12   | 88.06  | 158.09   | 79.55  |          |        | 1     |

Query 2415 Hit 1

MS/MS Fragmentation of **YMLLPNQVWDSIIHQQATK**

Found in **sp|O14980|XPO1\_HUMAN**, Exportin-1 OS=Homo sapiens GN=XPO1 PE=1 SV=1

Match to Query 2415: 2435.307 from (812.7763, 3+)

Title: 1200: Scan 2992 (rt=75.5913, f=3, i=424) [D:\lab212\membrane\Grace\20120214\_iTRAQ\_1.raw]

Data File:

**Monoisotopic mass of neutral peptide Mr(calc): 2435.307**

**Variable modifications:**

**K18** iTRAQ4plex (K)

**Ions Score: 43.29 Expect: 0.036**

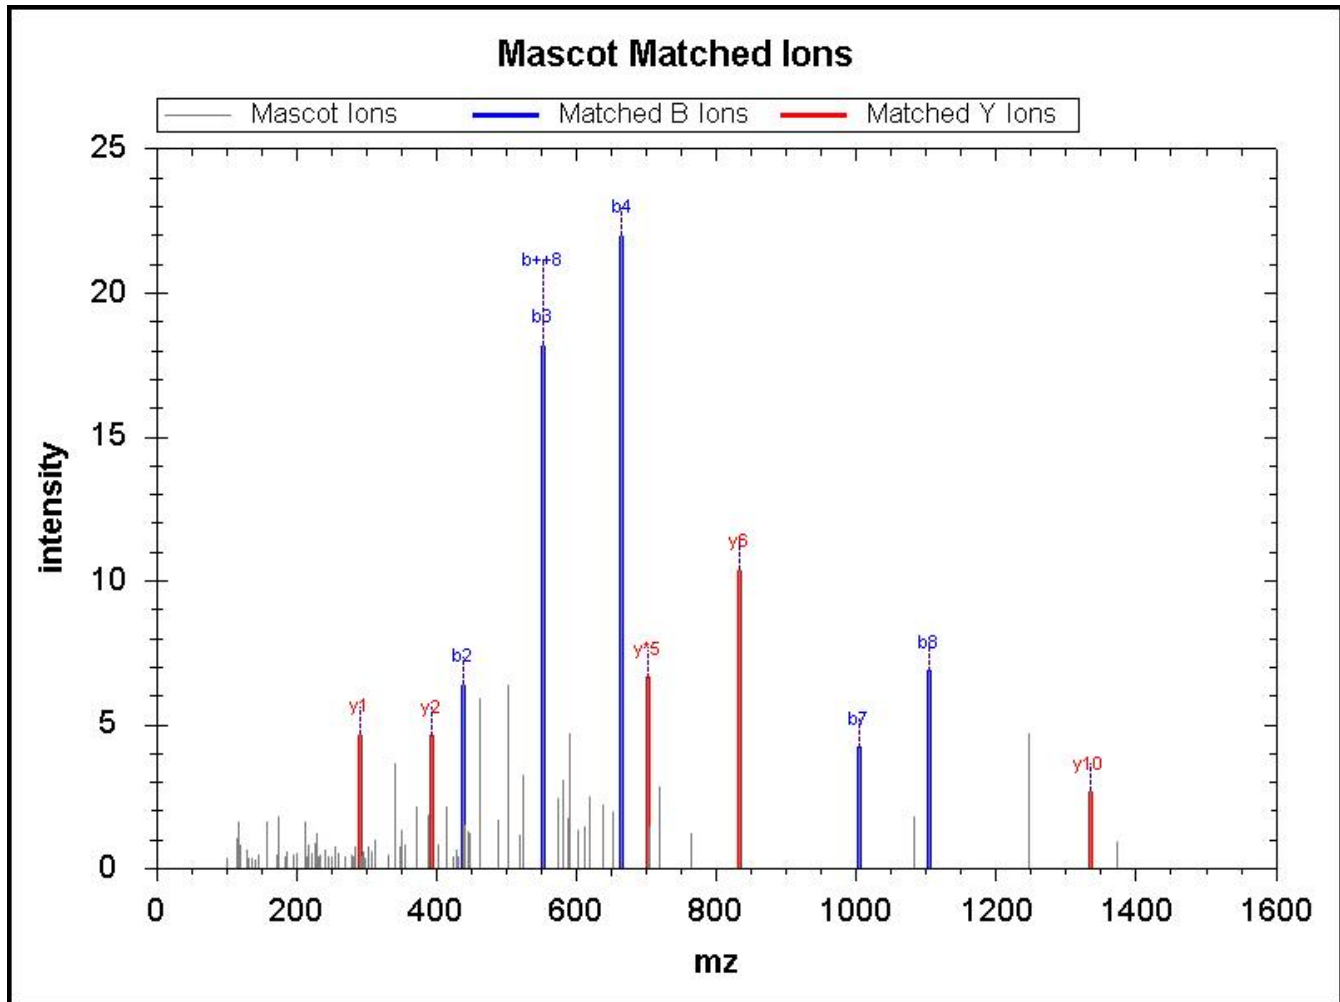

| No | b               | b++           | b*       | b***   | b0       | b0++   | Seq | y               | y++      | y*            | y***     | y0       | y0++     | RevNo |
|----|-----------------|---------------|----------|--------|----------|--------|-----|-----------------|----------|---------------|----------|----------|----------|-------|
| 1  | 308.17          | 154.59        |          |        |          |        | Y   |                 |          |               |          |          |          | 18    |
| 2  | <b>439.21</b>   | 220.11        |          |        |          |        | M   | 2,129.15        | 1,065.08 | 2,112.13      | 1,056.57 | 2,111.14 | 1,056.08 | 17    |
| 3  | <b>552.30</b>   | 276.65        |          |        |          |        | L   | 1,998.11        | 999.56   | 1,981.09      | 991.05   | 1,980.10 | 990.56   | 16    |
| 4  | <b>665.38</b>   | 333.19        |          |        |          |        | L   | 1,885.03        | 943.02   | 1,868.00      | 934.51   | 1,867.02 | 934.01   | 15    |
| 5  | 762.43          | 381.72        |          |        |          |        | P   | 1,771.95        | 886.48   | 1,754.92      | 877.96   | 1,753.94 | 877.47   | 14    |
| 6  | 876.48          | 438.74        | 859.45   | 430.23 |          |        | N   | 1,674.89        | 837.95   | 1,657.87      | 829.44   | 1,656.88 | 828.94   | 13    |
| 7  | <b>1,004.54</b> | 502.77        | 987.51   | 494.26 |          |        | Q   | 1,560.85        | 780.93   | 1,543.82      | 772.42   | 1,542.84 | 771.92   | 12    |
| 8  | <b>1,103.60</b> | <b>552.31</b> | 1,086.58 | 543.79 |          |        | V   | 1,432.79        | 716.90   | 1,415.77      | 708.39   | 1,414.78 | 707.89   | 11    |
| 9  | 1,289.68        | 645.35        | 1,272.66 | 636.83 |          |        | W   | <b>1,333.72</b> | 667.37   | 1,316.70      | 658.85   | 1,315.71 | 658.36   | 10    |
| 10 | 1,404.71        | 702.86        | 1,387.68 | 694.35 | 1,386.70 | 693.85 | D   | 1,147.64        | 574.33   | 1,130.62      | 565.81   | 1,129.63 | 565.32   | 9     |
| 11 | 1,491.74        | 746.37        | 1,474.72 | 737.86 | 1,473.73 | 737.37 | S   | 1,032.62        | 516.81   | 1,015.59      | 508.30   | 1,014.61 | 507.81   | 8     |
| 12 | 1,604.83        | 802.92        | 1,587.80 | 794.40 | 1,586.82 | 793.91 | I   | 945.58          | 473.30   | 928.56        | 464.78   | 927.57   | 464.29   | 7     |
| 13 | 1,717.91        | 859.46        | 1,700.88 | 850.95 | 1,699.90 | 850.45 | I   | <b>832.50</b>   | 416.75   | 815.47        | 408.24   | 814.49   | 407.75   | 6     |
| 14 | 1,845.97        | 923.49        | 1,828.94 | 914.97 | 1,827.96 | 914.48 | Q   | 719.42          | 360.21   | <b>702.39</b> | 351.70   | 701.41   | 351.21   | 5     |

|    |          |          |          |          |          |          |   |        |        |        |        |        |        |   |
|----|----------|----------|----------|----------|----------|----------|---|--------|--------|--------|--------|--------|--------|---|
| 15 | 1,974.03 | 987.52   | 1,957.00 | 979.00   | 1,956.02 | 978.51   | Q | 591.36 | 296.18 | 574.33 | 287.67 | 573.35 | 287.18 | 4 |
| 16 | 2,045.06 | 1,023.04 | 2,028.04 | 1,014.52 | 2,027.05 | 1,014.03 | A | 463.30 | 232.15 | 446.27 | 223.64 | 445.29 | 223.15 | 3 |
| 17 | 2,146.11 | 1,073.56 | 2,129.09 | 1,065.05 | 2,128.10 | 1,064.55 | T | 392.26 | 196.63 | 375.24 | 188.12 | 374.25 | 187.63 | 2 |
| 18 |          |          |          |          |          |          | K | 291.21 | 146.11 | 274.19 | 137.60 |        |        | 1 |

Query 2119 Hit 1

MS/MS Fragmentation of **YVATLGVEVHPLVFHTNR**

Found in **sp|P62826|RAN\_HUMAN**, GTP-binding nuclear protein Ran OS=Homo sapiens GN=RAN PE=1 SV=3

Match to Query 2119: 2195.195 from (549.806, 4+)

Title: 652: Scan 1845 (rt=49.746, f=3, i=239) [D:\lab212\membrane\Grace\20120214\_iTRAQ\_1.raw]

Data File:

**Monoisotopic mass of neutral peptide Mr(calc): 2195.195**

**Variable modifications:**

**Ions Score: 43.39 Expect: 0.034**

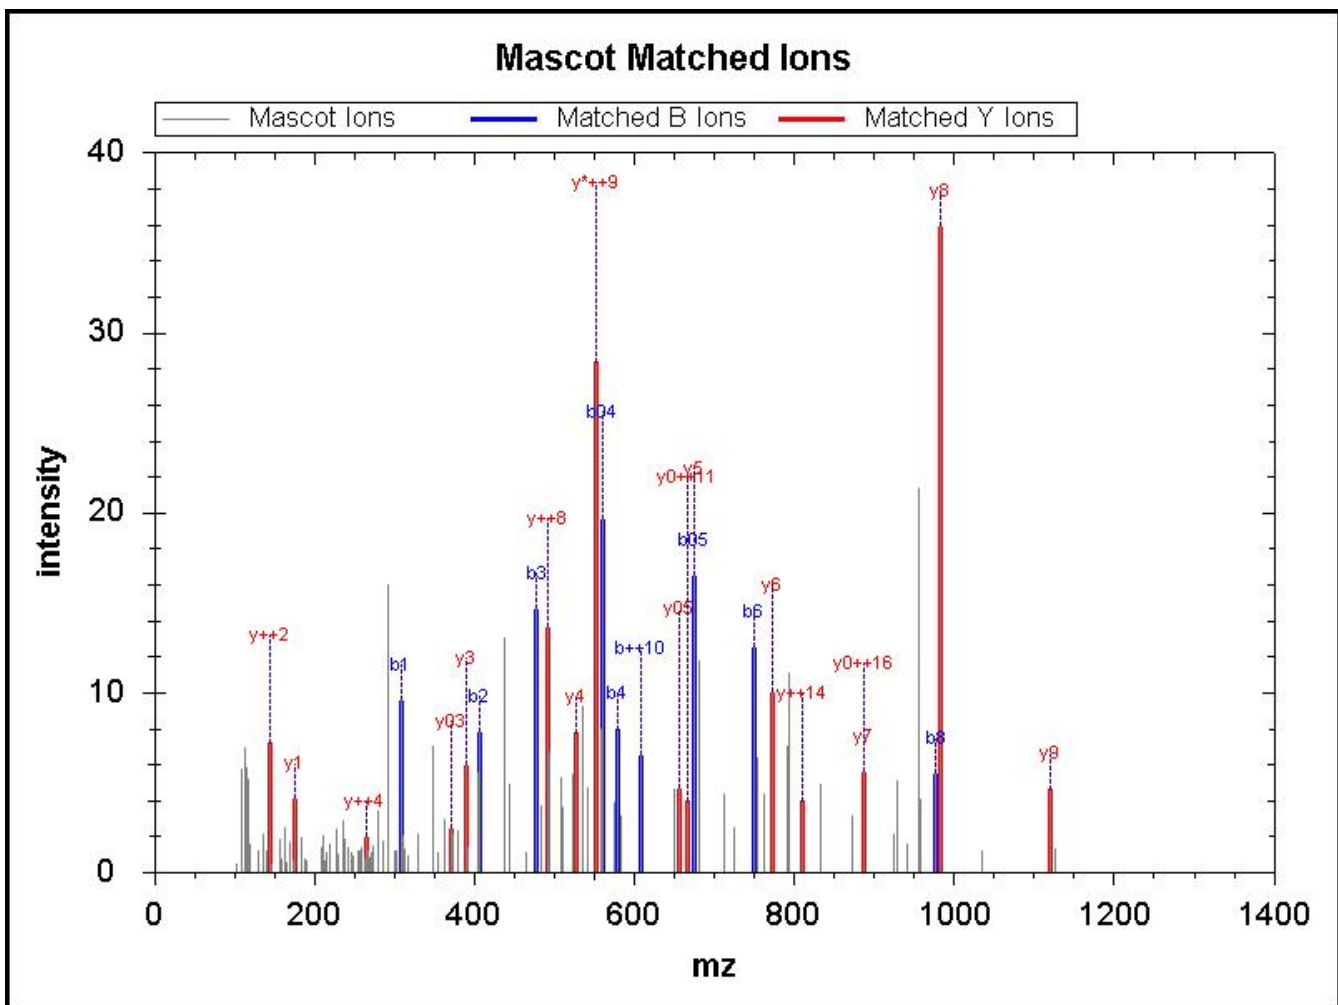

| No | b        | b++    | b* | b*++ | b0       | b0++   | Seq | y        | y++    | y*       | y*++   | y0       | y0++   | RevNo |
|----|----------|--------|----|------|----------|--------|-----|----------|--------|----------|--------|----------|--------|-------|
| 1  | 308.17   | 154.59 |    |      |          |        | Y   |          |        |          |        |          |        | 18    |
| 2  | 407.24   | 204.12 |    |      |          |        | V   | 1,889.04 | 945.02 | 1,872.01 | 936.51 | 1,871.03 | 936.02 | 17    |
| 3  | 478.28   | 239.64 |    |      |          |        | A   | 1,789.97 | 895.49 | 1,772.94 | 886.98 | 1,771.96 | 886.48 | 16    |
| 4  | 579.33   | 290.17 |    |      | 561.32   | 281.16 | T   | 1,718.93 | 859.97 | 1,701.91 | 851.46 | 1,700.92 | 850.97 | 15    |
| 5  | 692.41   | 346.71 |    |      | 674.40   | 337.70 | L   | 1,617.89 | 809.45 | 1,600.86 | 800.93 | 1,599.88 | 800.44 | 14    |
| 6  | 749.43   | 375.22 |    |      | 731.42   | 366.21 | G   | 1,504.80 | 752.90 | 1,487.78 | 744.39 | 1,486.79 | 743.90 | 13    |
| 7  | 848.50   | 424.75 |    |      | 830.49   | 415.75 | V   | 1,447.78 | 724.39 | 1,430.75 | 715.88 | 1,429.77 | 715.39 | 12    |
| 8  | 977.54   | 489.27 |    |      | 959.53   | 480.27 | E   | 1,348.71 | 674.86 | 1,331.69 | 666.35 | 1,330.70 | 665.85 | 11    |
| 9  | 1,076.61 | 538.81 |    |      | 1,058.60 | 529.80 | V   | 1,219.67 | 610.34 | 1,202.64 | 601.83 | 1,201.66 | 601.33 | 10    |
| 10 | 1,213.67 | 607.34 |    |      | 1,195.66 | 598.33 | H   | 1,120.60 | 560.80 | 1,103.57 | 552.29 | 1,102.59 | 551.80 | 9     |

|    |          |          |          |          |          |          |   |        |        |        |        |        |        |   |
|----|----------|----------|----------|----------|----------|----------|---|--------|--------|--------|--------|--------|--------|---|
| 11 | 1,310.72 | 655.86   |          |          | 1,292.71 | 646.86   | P | 983.54 | 492.27 | 966.52 | 483.76 | 965.53 | 483.27 | 8 |
| 12 | 1,423.81 | 712.41   |          |          | 1,405.80 | 703.40   | L | 886.49 | 443.75 | 869.46 | 435.24 | 868.48 | 434.74 | 7 |
| 13 | 1,522.88 | 761.94   |          |          | 1,504.86 | 752.94   | V | 773.41 | 387.21 | 756.38 | 378.69 | 755.39 | 378.20 | 6 |
| 14 | 1,669.94 | 835.48   |          |          | 1,651.93 | 826.47   | F | 674.34 | 337.67 | 657.31 | 329.16 | 656.33 | 328.67 | 5 |
| 15 | 1,807.00 | 904.00   |          |          | 1,788.99 | 895.00   | H | 527.27 | 264.14 | 510.24 | 255.62 | 509.26 | 255.13 | 4 |
| 16 | 1,908.05 | 954.53   |          |          | 1,890.04 | 945.52   | T | 390.21 | 195.61 | 373.18 | 187.10 | 372.20 | 186.60 | 3 |
| 17 | 2,022.09 | 1,011.55 | 2,005.07 | 1,003.04 | 2,004.08 | 1,002.54 | N | 289.16 | 145.08 | 272.14 | 136.57 |        |        | 2 |
| 18 |          |          |          |          |          |          | R | 175.12 | 88.06  | 158.09 | 79.55  |        |        | 1 |

Query 2258 Hit 1

MS/MS Fragmentation of **LKQEYFVVAATLQDIIR**

Found in **sp|P11216|PYGB\_HUMAN**, Glycogen phosphorylase

Match to Query 2258: 2294.32from(765.7806,3+)

Title: 1126: Sum of 2 scans in range 2826 (rt=71.8524, f=4, i=764) to 2827 (rt=71.8778, f=4, i=765)

[D:\lab212\membrane\Grace\20120214\_iTRAQ\_1.raw]

Data File:

**Monoisotopic mass of neutral peptide Mr(calc): 2294.32**

**Variable modifications:**

**K2** iTRAQ4plex (K)

**Ions Score: 43.62 Expect: 0.016**

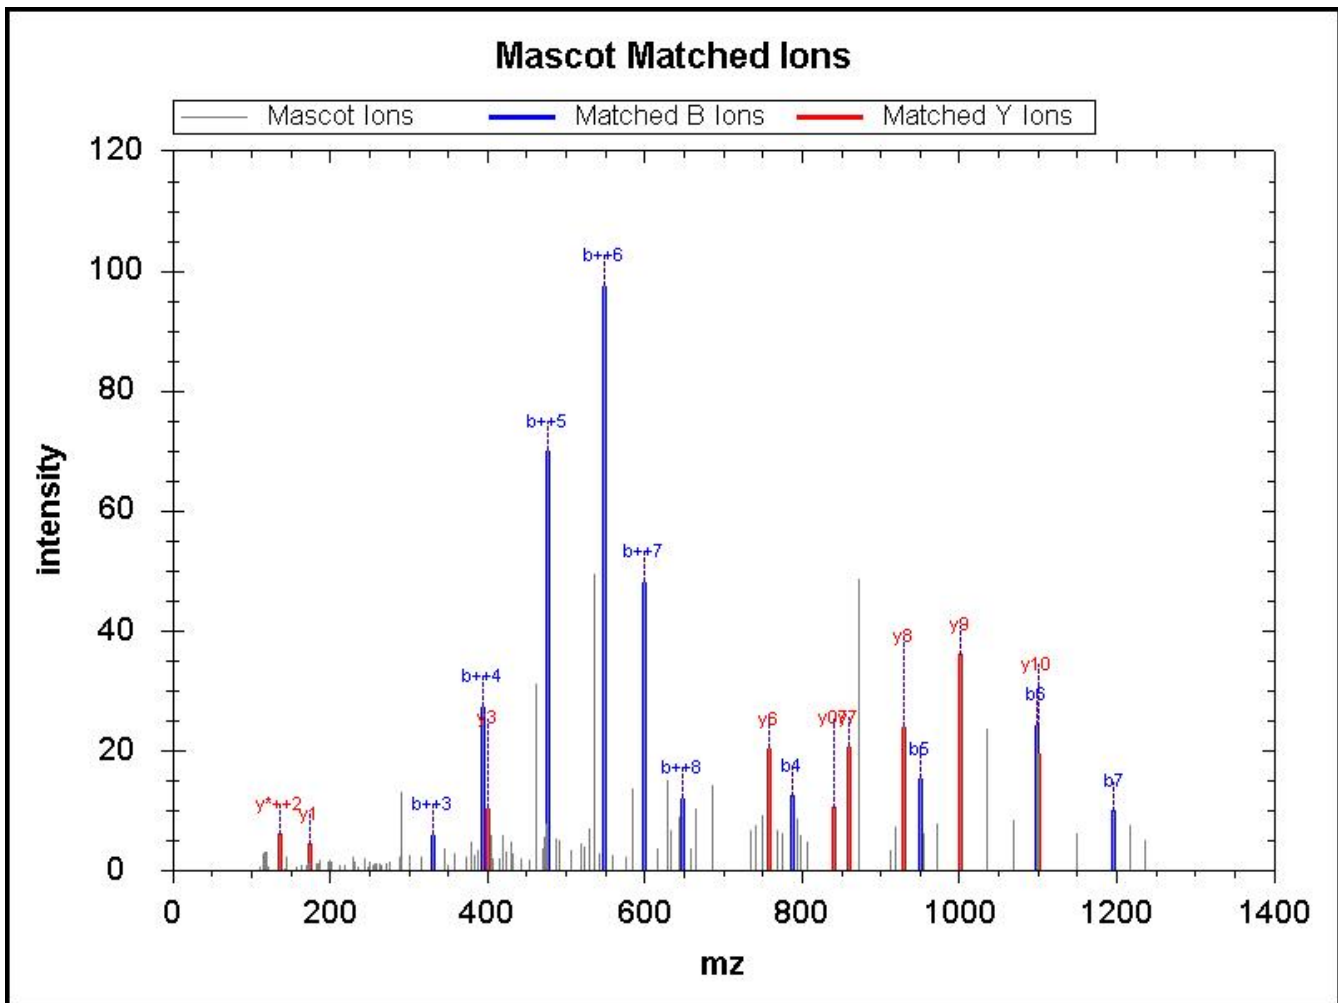

| No | b      | b++    | b*     | b*++   | b0     | b0++   | Seq | y        | y++      | y*       | y*++     | y0       | y0++     | RevNo |
|----|--------|--------|--------|--------|--------|--------|-----|----------|----------|----------|----------|----------|----------|-------|
| 1  | 258.19 | 129.60 |        |        |        |        | L   |          |          |          |          |          |          | 17    |
| 2  | 530.39 | 265.70 | 513.36 | 257.19 |        |        | K   | 2,038.15 | 1,019.58 | 2,021.12 | 1,011.06 | 2,020.13 | 1,010.57 | 16    |
| 3  | 658.45 | 329.73 | 641.42 | 321.21 |        |        | Q   | 1,765.95 | 883.48   | 1,748.92 | 874.96   | 1,747.94 | 874.47   | 15    |
| 4  | 787.49 | 394.25 | 770.47 | 385.74 | 769.48 | 385.24 | E   | 1,637.89 | 819.45   | 1,620.86 | 810.94   | 1,619.88 | 810.44   | 14    |
| 5  | 950.55 | 475.78 | 933.53 | 467.27 | 932.54 | 466.78 | Y   | 1,508.85 | 754.93   | 1,491.82 | 746.41   | 1,490.84 | 745.92   | 13    |

|    |          |          |          |          |          |          |   |          |        |          |        |          |        |    |
|----|----------|----------|----------|----------|----------|----------|---|----------|--------|----------|--------|----------|--------|----|
| 6  | 1,097.62 | 549.32   | 1,080.60 | 540.80   | 1,079.61 | 540.31   | F | 1,345.78 | 673.40 | 1,328.76 | 664.88 | 1,327.77 | 664.39 | 12 |
| 7  | 1,196.69 | 598.85   | 1,179.67 | 590.34   | 1,178.68 | 589.84   | V | 1,198.72 | 599.86 | 1,181.69 | 591.35 | 1,180.70 | 590.86 | 11 |
| 8  | 1,295.76 | 648.38   | 1,278.73 | 639.87   | 1,277.75 | 639.38   | V | 1,099.65 | 550.33 | 1,082.62 | 541.81 | 1,081.64 | 541.32 | 10 |
| 9  | 1,366.80 | 683.90   | 1,349.77 | 675.39   | 1,348.79 | 674.90   | A | 1,000.58 | 500.79 | 983.55   | 492.28 | 982.57   | 491.79 | 9  |
| 10 | 1,437.83 | 719.42   | 1,420.81 | 710.91   | 1,419.82 | 710.42   | A | 929.54   | 465.27 | 912.51   | 456.76 | 911.53   | 456.27 | 8  |
| 11 | 1,538.88 | 769.94   | 1,521.86 | 761.43   | 1,520.87 | 760.94   | T | 858.50   | 429.76 | 841.48   | 421.24 | 840.49   | 420.75 | 7  |
| 12 | 1,651.97 | 826.49   | 1,634.94 | 817.97   | 1,633.96 | 817.48   | L | 757.46   | 379.23 | 740.43   | 370.72 | 739.45   | 370.23 | 6  |
| 13 | 1,780.02 | 890.52   | 1,763.00 | 882.00   | 1,762.01 | 881.51   | Q | 644.37   | 322.69 | 627.35   | 314.18 | 626.36   | 313.68 | 5  |
| 14 | 1,895.05 | 948.03   | 1,878.03 | 939.52   | 1,877.04 | 939.02   | D | 516.31   | 258.66 | 499.29   | 250.15 | 498.30   | 249.66 | 4  |
| 15 | 2,008.14 | 1,004.57 | 1,991.11 | 996.06   | 1,990.13 | 995.57   | I | 401.29   | 201.15 | 384.26   | 192.63 |          |        | 3  |
| 16 | 2,121.22 | 1,061.11 | 2,104.19 | 1,052.60 | 2,103.21 | 1,052.11 | I | 288.20   | 144.61 | 271.18   | 136.09 |          |        | 2  |
| 17 |          |          |          |          |          |          | R | 175.12   | 88.06  | 158.09   | 79.55  |          |        | 1  |

Query 2342 Hit 1

MS/MS Fragmentation of **QFGFIVLTTSAGIMDHEEAR**

Found in **sp|P62244|RS15A\_HUMAN**, 40S ribosomal protein S15a OS=Homo sapiens GN=RPS15A PE=1 SV=2

Match to Query 2342: 2365.185from(789.4022,3+)

Title: 940: Sum of 2 scans in range 2398 (rt=62.2933, f=4, i=623) to 2399 (rt=62.3187, f=4, i=624)

[D:\lab212\membrane\Grace\20120214\_iTRAQ\_2.raw]

Data File:

**Monoisotopic mass of neutral peptide Mr(calc): 2365.185**

**Variable modifications:**

**Ions Score: 44.6 Expect: 0.033**

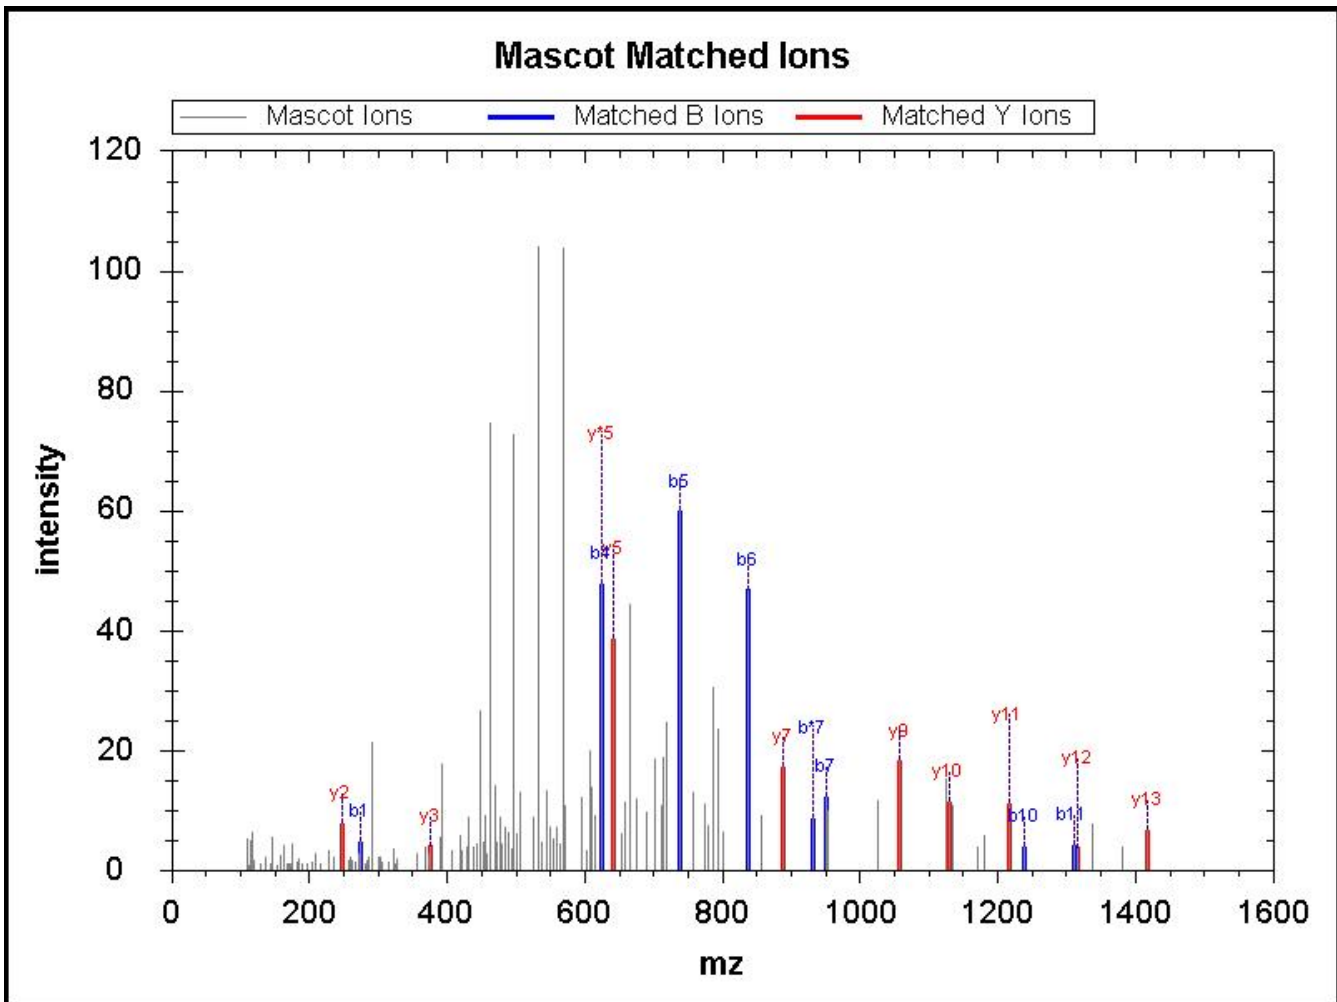

| No | b      | b++    | b*     | b*++   | b0 | b0++ | Seq | y        | y++      | y*       | y*++     | y0       | y0++     | RevNo |
|----|--------|--------|--------|--------|----|------|-----|----------|----------|----------|----------|----------|----------|-------|
| 1  | 273.17 | 137.09 | 256.14 | 128.57 |    |      | Q   |          |          |          |          |          |          | 20    |
| 2  | 420.24 | 210.62 | 403.21 | 202.11 |    |      | F   | 2,094.03 | 1,047.52 | 2,077.01 | 1,039.01 | 2,076.02 | 1,038.51 | 19    |

|    |          |          |          |          |          |          |   |          |        |          |        |          |        |    |
|----|----------|----------|----------|----------|----------|----------|---|----------|--------|----------|--------|----------|--------|----|
| 3  | 477.26   | 239.13   | 460.23   | 230.62   |          |          | G | 1,946.96 | 973.99 | 1,929.94 | 965.47 | 1,928.95 | 964.98 | 18 |
| 4  | 624.33   | 312.67   | 607.30   | 304.15   |          |          | F | 1,889.94 | 945.47 | 1,872.92 | 936.96 | 1,871.93 | 936.47 | 17 |
| 5  | 737.41   | 369.21   | 720.38   | 360.70   |          |          | I | 1,742.87 | 871.94 | 1,725.85 | 863.43 | 1,724.86 | 862.94 | 16 |
| 6  | 836.48   | 418.74   | 819.45   | 410.23   |          |          | V | 1,629.79 | 815.40 | 1,612.76 | 806.89 | 1,611.78 | 806.39 | 15 |
| 7  | 949.56   | 475.29   | 932.54   | 466.77   |          |          | L | 1,530.72 | 765.86 | 1,513.70 | 757.35 | 1,512.71 | 756.86 | 14 |
| 8  | 1,050.61 | 525.81   | 1,033.58 | 517.30   | 1,032.60 | 516.80   | T | 1,417.64 | 709.32 | 1,400.61 | 700.81 | 1,399.63 | 700.32 | 13 |
| 9  | 1,151.66 | 576.33   | 1,134.63 | 567.82   | 1,133.65 | 567.33   | T | 1,316.59 | 658.80 | 1,299.56 | 650.29 | 1,298.58 | 649.79 | 12 |
| 10 | 1,238.69 | 619.85   | 1,221.66 | 611.34   | 1,220.68 | 610.84   | S | 1,215.54 | 608.27 | 1,198.52 | 599.76 | 1,197.53 | 599.27 | 11 |
| 11 | 1,309.73 | 655.37   | 1,292.70 | 646.85   | 1,291.72 | 646.36   | A | 1,128.51 | 564.76 | 1,111.48 | 556.25 | 1,110.50 | 555.75 | 10 |
| 12 | 1,366.75 | 683.88   | 1,349.72 | 675.36   | 1,348.74 | 674.87   | G | 1,057.47 | 529.24 | 1,040.45 | 520.73 | 1,039.46 | 520.23 | 9  |
| 13 | 1,479.83 | 740.42   | 1,462.81 | 731.91   | 1,461.82 | 731.41   | I | 1,000.45 | 500.73 | 983.42   | 492.22 | 982.44   | 491.72 | 8  |
| 14 | 1,610.87 | 805.94   | 1,593.85 | 797.43   | 1,592.86 | 796.94   | M | 887.37   | 444.19 | 870.34   | 435.67 | 869.36   | 435.18 | 7  |
| 15 | 1,725.90 | 863.45   | 1,708.87 | 854.94   | 1,707.89 | 854.45   | D | 756.33   | 378.67 | 739.30   | 370.15 | 738.32   | 369.66 | 6  |
| 16 | 1,862.96 | 931.98   | 1,845.93 | 923.47   | 1,844.95 | 922.98   | H | 641.30   | 321.15 | 624.27   | 312.64 | 623.29   | 312.15 | 5  |
| 17 | 1,992.00 | 996.50   | 1,974.98 | 987.99   | 1,973.99 | 987.50   | E | 504.24   | 252.62 | 487.21   | 244.11 | 486.23   | 243.62 | 4  |
| 18 | 2,121.04 | 1,061.03 | 2,104.02 | 1,052.51 | 2,103.03 | 1,052.02 | E | 375.20   | 188.10 | 358.17   | 179.59 | 357.19   | 179.10 | 3  |
| 19 | 2,192.08 | 1,096.54 | 2,175.05 | 1,088.03 | 2,174.07 | 1,087.54 | A | 246.16   | 123.58 | 229.13   | 115.07 |          |        | 2  |
| 20 |          |          |          |          |          |          | R | 175.12   | 88.06  | 158.09   | 79.55  |          |        | 1  |

Query 2175 Hit 1

MS/MS Fragmentation of **FVSSPQTIVELFFQEVAR**

Found in **sp|Q12769|NU160\_HUMAN**, Nuclear pore complex protein Nup160 OS=Homo sapiens GN=NUP160 PE=1 SV=3

Match to Query 2175: 2240.198from(747.7398,3+)

Title: 1427: Scan 3471 (rt=86.403, f=3, i=521) [D:\lab212\membrane\Grace\20120214\_iTRAQ\_2.raw]

Data File:

**Monoisotopic mass of neutral peptide Mr(calc):** 2240.198

**Variable modifications:**

**Ions Score:** 44.62 **Expect:** 0.029



### Mascot Matched Ions

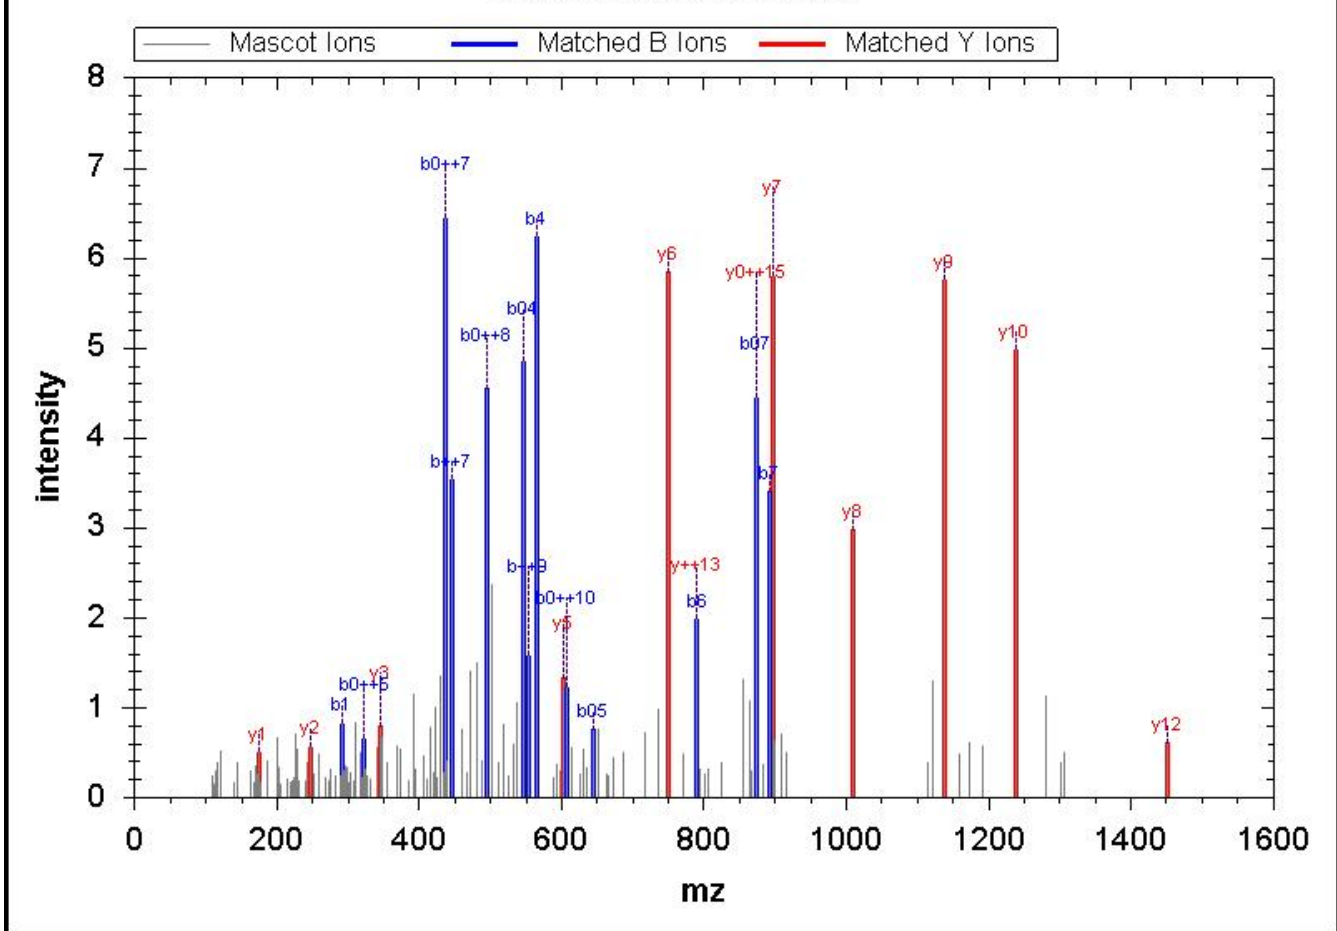

| No | b             | b++           | b*       | b*++     | b0            | b0++          | Seq | y               | y++           | y*       | y*++   | y0       | y0++          | RevNo |
|----|---------------|---------------|----------|----------|---------------|---------------|-----|-----------------|---------------|----------|--------|----------|---------------|-------|
| 1  | <b>292.18</b> | 146.59        |          |          |               |               | F   |                 |               |          |        |          |               | 18    |
| 2  | 391.25        | 196.13        |          |          |               |               | V   | 1,950.03        | 975.52        | 1,933.01 | 967.01 | 1,932.02 | 966.51        | 17    |
| 3  | 478.28        | 239.64        |          |          | 460.27        | 230.64        | S   | 1,850.96        | 925.99        | 1,833.94 | 917.47 | 1,832.95 | 916.98        | 16    |
| 4  | <b>565.31</b> | 283.16        |          |          | <b>547.30</b> | 274.15        | S   | 1,763.93        | 882.47        | 1,746.91 | 873.96 | 1,745.92 | <b>873.46</b> | 15    |
| 5  | 662.36        | 331.69        |          |          | <b>644.35</b> | <b>322.68</b> | P   | 1,676.90        | 838.95        | 1,659.87 | 830.44 | 1,658.89 | 829.95        | 14    |
| 6  | <b>790.42</b> | 395.71        | 773.40   | 387.20   | 772.41        | 386.71        | Q   | 1,579.85        | <b>790.43</b> | 1,562.82 | 781.91 | 1,561.84 | 781.42        | 13    |
| 7  | <b>891.47</b> | <b>446.24</b> | 874.44   | 437.72   | <b>873.46</b> | <b>437.23</b> | T   | <b>1,451.79</b> | 726.40        | 1,434.76 | 717.89 | 1,433.78 | 717.39        | 12    |
| 8  | 1,004.55      | 502.78        | 987.53   | 494.27   | 986.54        | <b>493.77</b> | I   | 1,350.74        | 675.87        | 1,333.72 | 667.36 | 1,332.73 | 666.87        | 11    |
| 9  | 1,103.62      | <b>552.31</b> | 1,086.60 | 543.80   | 1,085.61      | 543.31        | V   | <b>1,237.66</b> | 619.33        | 1,220.63 | 610.82 | 1,219.65 | 610.33        | 10    |
| 10 | 1,232.66      | 616.84        | 1,215.64 | 608.32   | 1,214.65      | <b>607.83</b> | E   | <b>1,138.59</b> | 569.80        | 1,121.56 | 561.28 | 1,120.58 | 560.79        | 9     |
| 11 | 1,345.75      | 673.38        | 1,328.72 | 664.86   | 1,327.74      | 664.37        | L   | <b>1,009.55</b> | 505.28        | 992.52   | 496.76 | 991.54   | 496.27        | 8     |
| 12 | 1,492.82      | 746.91        | 1,475.79 | 738.40   | 1,474.81      | 737.91        | F   | <b>896.46</b>   | 448.73        | 879.44   | 440.22 | 878.45   | 439.73        | 7     |
| 13 | 1,639.89      | 820.45        | 1,622.86 | 811.93   | 1,621.87      | 811.44        | F   | <b>749.39</b>   | 375.20        | 732.37   | 366.69 | 731.38   | 366.20        | 6     |
| 14 | 1,767.94      | 884.48        | 1,750.92 | 875.96   | 1,749.93      | 875.47        | Q   | <b>602.33</b>   | 301.67        | 585.30   | 293.15 | 584.32   | 292.66        | 5     |
| 15 | 1,896.99      | 949.00        | 1,879.96 | 940.48   | 1,878.98      | 939.99        | E   | 474.27          | 237.64        | 457.24   | 229.12 | 456.26   | 228.63        | 4     |
| 16 | 1,996.05      | 998.53        | 1,979.03 | 990.02   | 1,978.04      | 989.53        | V   | <b>345.22</b>   | 173.12        | 328.20   | 164.60 |          |               | 3     |
| 17 | 2,067.09      | 1,034.05      | 2,050.07 | 1,025.54 | 2,049.08      | 1,025.04      | A   | <b>246.16</b>   | 123.58        | 229.13   | 115.07 |          |               | 2     |
| 18 |               |               |          |          |               |               | R   | <b>175.12</b>   | 88.06         | 158.09   | 79.55  |          |               | 1     |

Query 1942 Hit 1

MS/MS Fragmentation of **VAIHEELVVG YETSLK**

Found in **sp|Q9BXJ9|NAA15\_HUMAN**, N-alpha-acetyltransferase 15

Match to Query 1942: 2050.174 from (684.3984, 3+)

Title: 1209: Scan 3011 (rt=76.0182, f=3, i=427) [D:\lab212\membrane\Grace\20120214\_iTRAQ\_1.raw]

Data File:

**Monoisotopic mass of neutral peptide Mr(calc):** 2050.174

**Variable modifications:**

**K16** iTRAQ4plex (K)

**Ions Score:** 44.97 **Expect:** 0.016

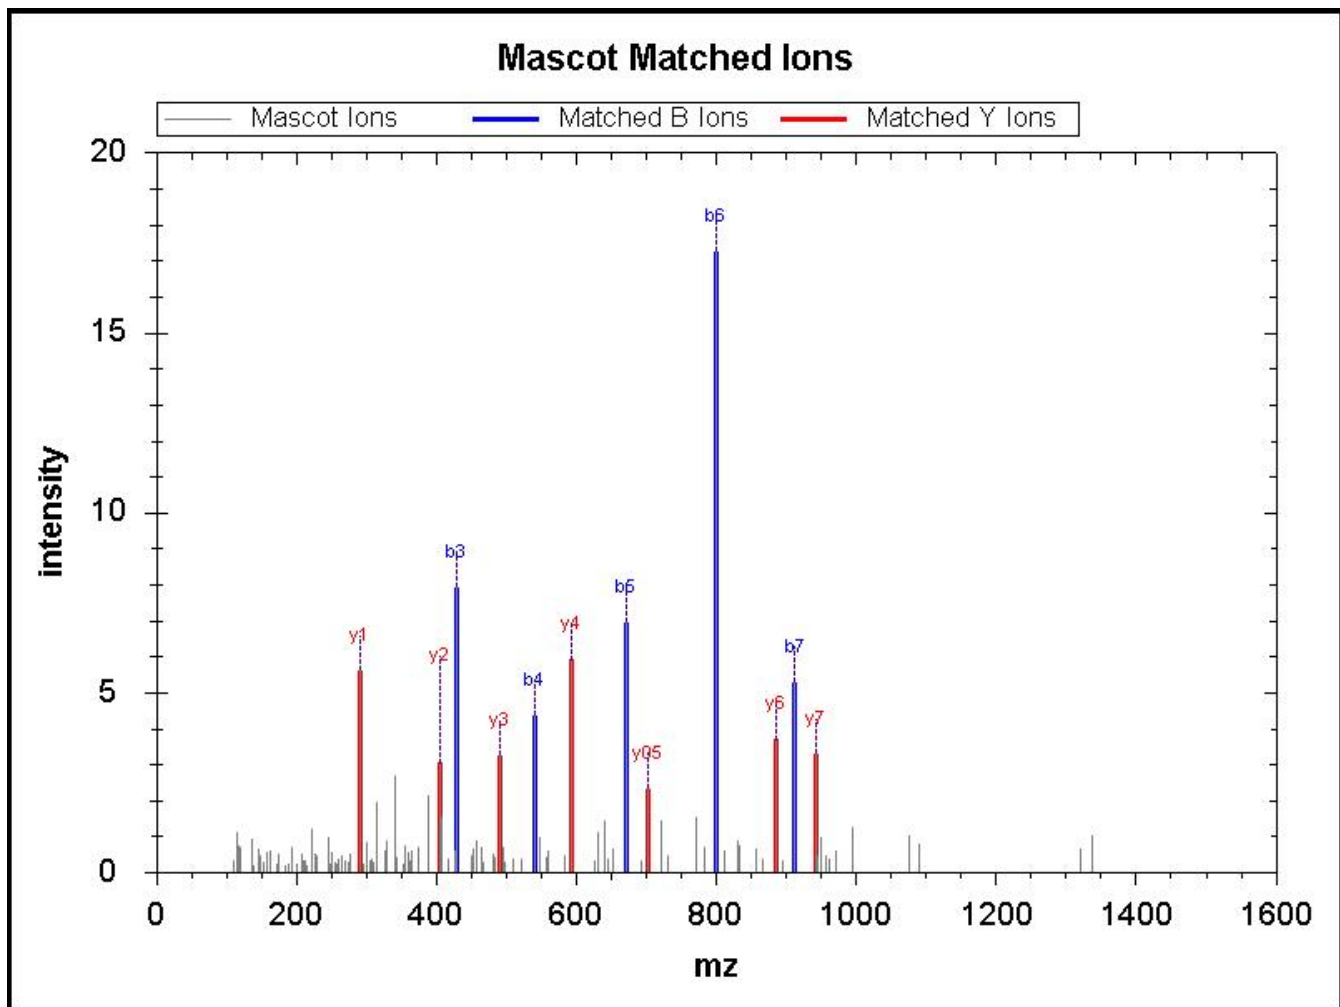

| No | b             | b++    | b0       | b0++   | Seq | y             | y++    | y*       | y*++   | y0            | y0++   | RevNo |
|----|---------------|--------|----------|--------|-----|---------------|--------|----------|--------|---------------|--------|-------|
| 1  | 244.18        | 122.59 |          |        | V   |               |        |          |        |               |        | 16    |
| 2  | 315.21        | 158.11 |          |        | A   | 1,808.02      | 904.51 | 1,790.99 | 896.00 | 1,790.01      | 895.51 | 15    |
| 3  | <b>428.30</b> | 214.65 |          |        | I   | 1,736.98      | 868.99 | 1,719.95 | 860.48 | 1,718.97      | 859.99 | 14    |
| 4  | <b>541.38</b> | 271.20 |          |        | I   | 1,623.90      | 812.45 | 1,606.87 | 803.94 | 1,605.89      | 803.45 | 13    |
| 5  | <b>670.43</b> | 335.72 | 652.41   | 326.71 | E   | 1,510.81      | 755.91 | 1,493.79 | 747.40 | 1,492.80      | 746.90 | 12    |
| 6  | <b>799.47</b> | 400.24 | 781.46   | 391.23 | E   | 1,381.77      | 691.39 | 1,364.74 | 682.88 | 1,363.76      | 682.38 | 11    |
| 7  | <b>912.55</b> | 456.78 | 894.54   | 447.77 | L   | 1,252.73      | 626.87 | 1,235.70 | 618.35 | 1,234.72      | 617.86 | 10    |
| 8  | 1,011.62      | 506.31 | 993.61   | 497.31 | V   | 1,139.64      | 570.33 | 1,122.62 | 561.81 | 1,121.63      | 561.32 | 9     |
| 9  | 1,110.69      | 555.85 | 1,092.68 | 546.84 | V   | 1,040.57      | 520.79 | 1,023.55 | 512.28 | 1,022.56      | 511.79 | 8     |
| 10 | 1,167.71      | 584.36 | 1,149.70 | 575.35 | G   | <b>941.51</b> | 471.26 | 924.48   | 462.74 | 923.50        | 462.25 | 7     |
| 11 | 1,330.77      | 665.89 | 1,312.76 | 656.89 | Y   | <b>884.48</b> | 442.75 | 867.46   | 434.23 | 866.47        | 433.74 | 6     |
| 12 | 1,459.82      | 730.41 | 1,441.81 | 721.41 | E   | 721.42        | 361.21 | 704.39   | 352.70 | <b>703.41</b> | 352.21 | 5     |
| 13 | 1,560.86      | 780.94 | 1,542.85 | 771.93 | T   | <b>592.38</b> | 296.69 | 575.35   | 288.18 | 574.37        | 287.69 | 4     |
| 14 | 1,647.90      | 824.45 | 1,629.89 | 815.45 | S   | <b>491.33</b> | 246.17 | 474.30   | 237.66 | 473.32        | 237.16 | 3     |
| 15 | 1,760.98      | 880.99 | 1,742.97 | 871.99 | L   | <b>404.30</b> | 202.65 | 387.27   | 194.14 |               |        | 2     |
| 16 |               |        |          |        | K   | <b>291.21</b> | 146.11 | 274.19   | 137.60 |               |        | 1     |

Query 1778 Hit 1

MS/MS Fragmentation of **DISEASVFDAYVLPK**

Found in **sp|P62854|RS26\_HUMAN**, 40S ribosomal protein S26 OS=Homo sapiens GN=RPS26 PE=1 SV=3

Match to Query 1778: 1941.03from(648.0173,3+)

Title: 810: Scan 2173 (rt=57.1326, f=2, i=340) [D:\lab212\membrane\Grace\20120214\_iTRAQ\_1.raw]

Data File:

**Monoisotopic mass of neutral peptide Mr(calc):** 1941.03

**Variable modifications:**

**K15** iTRAQ4plex (K)

**Ions Score:** 45.07 **Expect:** 0.027

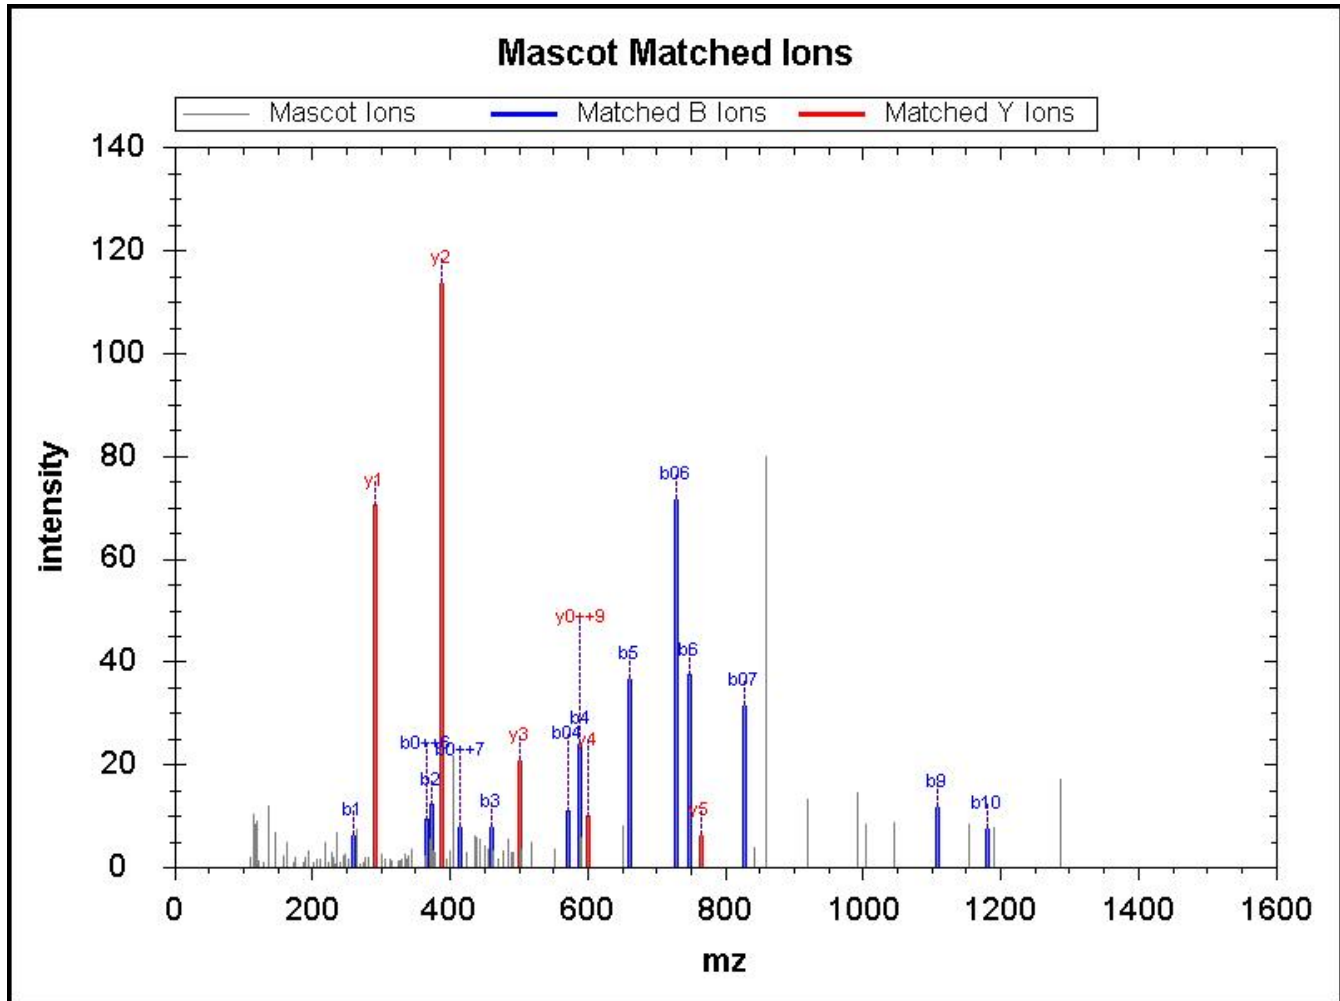

| No | b        | b++    | b0       | b0++   | Seq | y        | y++    | y*       | y*++   | y0       | y0++   | RevNo |
|----|----------|--------|----------|--------|-----|----------|--------|----------|--------|----------|--------|-------|
| 1  | 260.14   | 130.57 | 242.13   | 121.57 | D   |          |        |          |        |          |        | 15    |
| 2  | 373.22   | 187.11 | 355.21   | 178.11 | I   | 1,682.91 | 841.96 | 1,665.89 | 833.45 | 1,664.90 | 832.95 | 14    |
| 3  | 460.25   | 230.63 | 442.24   | 221.62 | S   | 1,569.83 | 785.42 | 1,552.80 | 776.90 | 1,551.82 | 776.41 | 13    |
| 4  | 589.29   | 295.15 | 571.28   | 286.15 | E   | 1,482.80 | 741.90 | 1,465.77 | 733.39 | 1,464.79 | 732.90 | 12    |
| 5  | 660.33   | 330.67 | 642.32   | 321.66 | A   | 1,353.75 | 677.38 | 1,336.73 | 668.87 | 1,335.74 | 668.38 | 11    |
| 6  | 747.36   | 374.19 | 729.35   | 365.18 | S   | 1,282.72 | 641.86 | 1,265.69 | 633.35 | 1,264.71 | 632.86 | 10    |
| 7  | 846.43   | 423.72 | 828.42   | 414.71 | V   | 1,195.68 | 598.35 | 1,178.66 | 589.83 | 1,177.67 | 589.34 | 9     |
| 8  | 993.50   | 497.25 | 975.49   | 488.25 | F   | 1,096.62 | 548.81 | 1,079.59 | 540.30 | 1,078.61 | 539.81 | 8     |
| 9  | 1,108.53 | 554.77 | 1,090.52 | 545.76 | D   | 949.55   | 475.28 | 932.52   | 466.76 | 931.54   | 466.27 | 7     |
| 10 | 1,179.57 | 590.29 | 1,161.55 | 581.28 | A   | 834.52   | 417.76 | 817.49   | 409.25 |          |        | 6     |
| 11 | 1,342.63 | 671.82 | 1,324.62 | 662.81 | Y   | 763.48   | 382.25 | 746.46   | 373.73 |          |        | 5     |
| 12 | 1,441.70 | 721.35 | 1,423.69 | 712.35 | V   | 600.42   | 300.71 | 583.39   | 292.20 |          |        | 4     |
| 13 | 1,554.78 | 777.89 | 1,536.77 | 768.89 | L   | 501.35   | 251.18 | 484.33   | 242.67 |          |        | 3     |
| 14 | 1,651.83 | 826.42 | 1,633.82 | 817.42 | P   | 388.27   | 194.64 | 371.24   | 186.12 |          |        | 2     |
| 15 |          |        |          |        | K   | 291.21   | 146.11 | 274.19   | 137.60 |          |        | 1     |

MS/MS Fragmentation of **SGEIINK**

Found in **sp|Q8R4U0|STAB2\_MOUSE**, Stabilin-2 OS=Mus musculus GN=Stab2 PE=1 SV=1

Match to Query 130: 904.5448from(453.2797,2+)

Title: 243: Scan 989 (rt=30.4532, f=2, i=149) [D:\lab212\membrane\Grace\20120214\_iTRAQ\_1.raw]

Data File:

**Monoisotopic mass of neutral peptide Mr(calc): 904.5448**

**Variable modifications:**

**N6** :Deamidated (NQ)

**K7** :iTRAQ4plex (K)

**Ions Score: 45.9 Expect: 0.022**

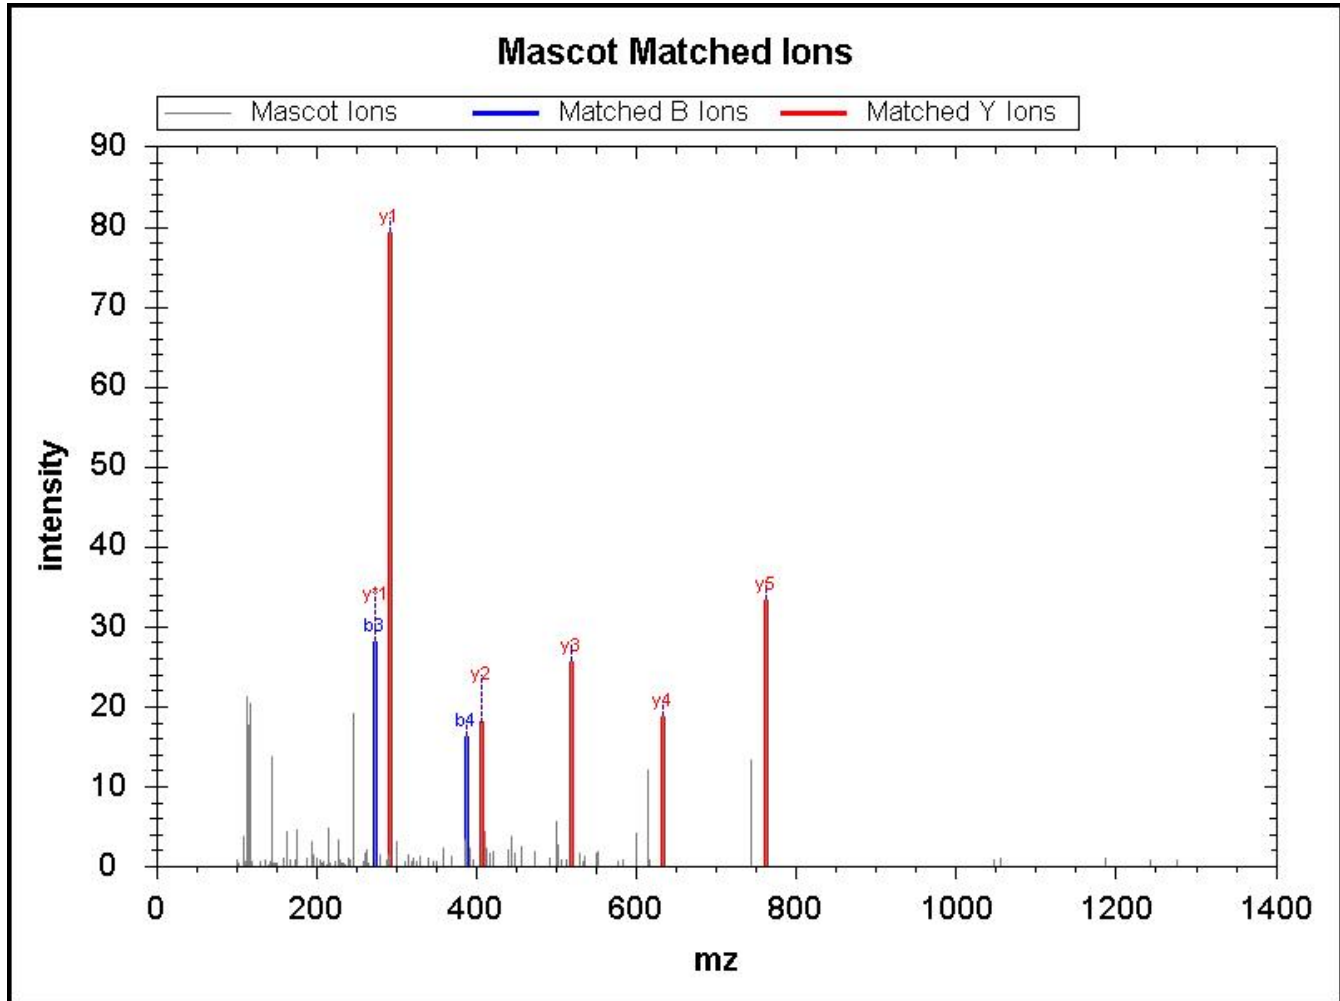

| No | b             | b++    | b*     | b*++   | b0     | b0++   | Seq | y             | y++    | y*            | y*++   | y0     | y0++   | RevNo |
|----|---------------|--------|--------|--------|--------|--------|-----|---------------|--------|---------------|--------|--------|--------|-------|
| 1  | 88.04         | 44.52  |        |        | 70.03  | 35.52  | S   |               |        |               |        |        |        | 7     |
| 2  | 145.06        | 73.03  |        |        | 127.05 | 64.03  | G   | 818.47        | 409.74 | 801.45        | 401.23 | 800.46 | 400.74 | 6     |
| 3  | <b>274.10</b> | 137.56 |        |        | 256.09 | 128.55 | E   | <b>761.45</b> | 381.23 | 744.43        | 372.72 | 743.44 | 372.22 | 5     |
| 4  | <b>387.19</b> | 194.10 |        |        | 369.18 | 185.09 | I   | <b>632.41</b> | 316.71 | 615.38        | 308.20 |        |        | 4     |
| 5  | 500.27        | 250.64 |        |        | 482.26 | 241.63 | I   | <b>519.33</b> | 260.17 | 502.30        | 251.65 |        |        | 3     |
| 6  | 615.30        | 308.15 | 598.27 | 299.64 | 597.29 | 299.15 | N   | <b>406.24</b> | 203.62 | 389.22        | 195.11 |        |        | 2     |
| 7  |               |        |        |        |        |        | K   | <b>291.21</b> | 146.11 | <b>274.19</b> | 137.60 |        |        | 1     |

Query 40 Hit 1

MS/MS Fragmentation of **GSINLKR**

Found in **sp|Q7Z5Q5|DPOLN\_HUMAN**, DNA polymerase nu OS=Homo sapiens GN=POLN PE=1 SV=2

Match to Query 40: 787.4691from(394.7418,2+)

Title: 314: Scan 1094 (rt=32.9043, f=2, i=166) [D:\lab212\membrane\Grace\20120214\_iTRAQ\_2.raw]

Data File:

**Monoisotopic mass of neutral peptide Mr(calc): 787.4691**

**Variable modifications:**

**N4** :Deamidated (NQ)

Ions Score: 46.18 Expect: 0.017

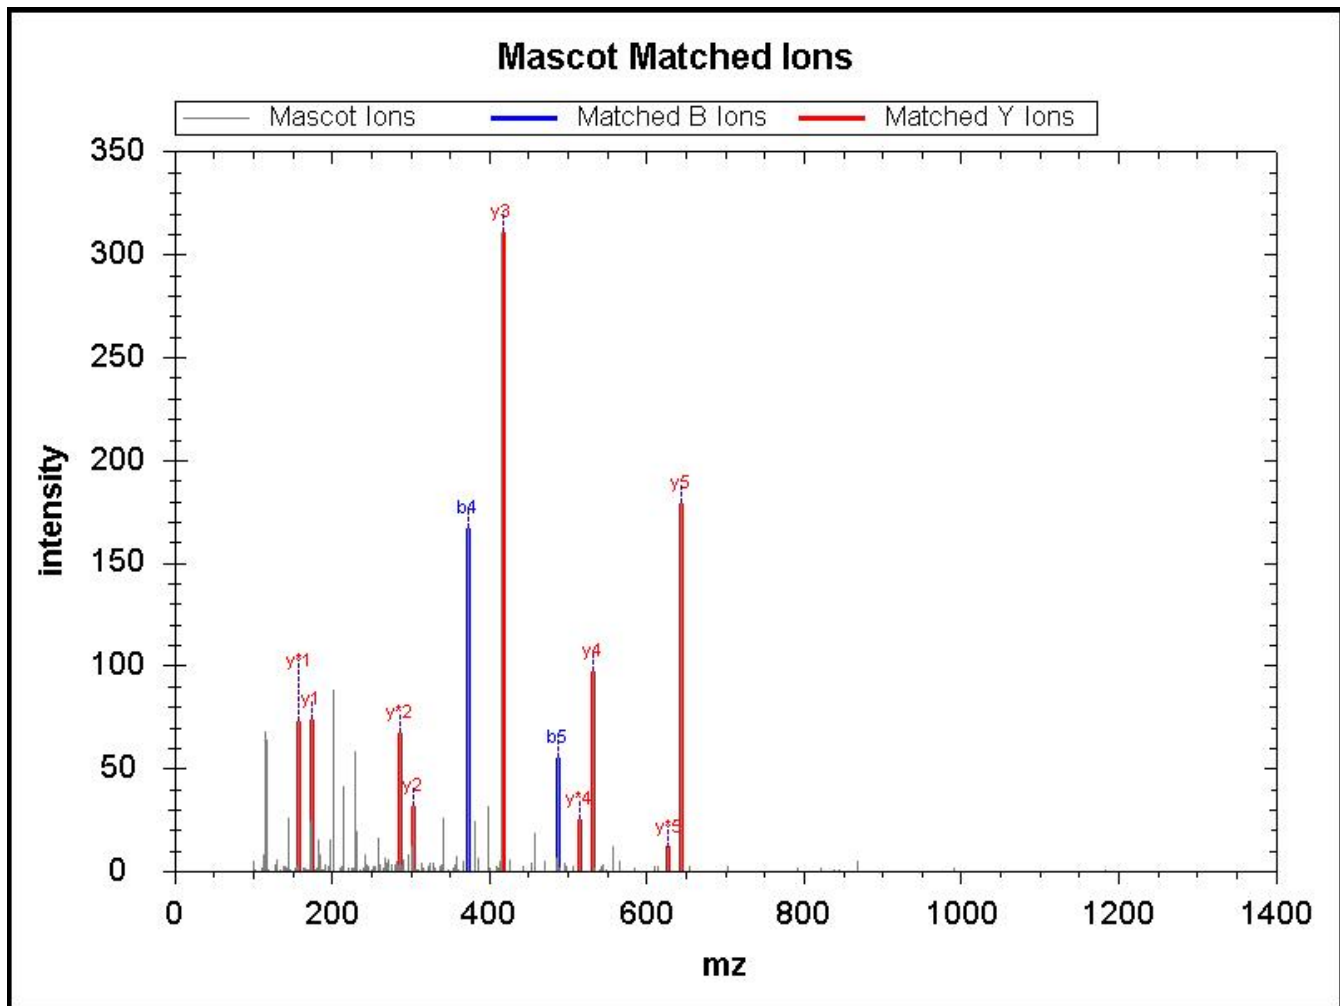

| No | b      | b++    | b*     | b*++   | b0     | b0++   | Seq | y      | y++    | y*     | y*++   | y0     | y0++   | RevNo |
|----|--------|--------|--------|--------|--------|--------|-----|--------|--------|--------|--------|--------|--------|-------|
| 1  | 58.03  | 29.52  |        |        |        |        | G   |        |        |        |        |        |        | 7     |
| 2  | 145.06 | 73.03  |        |        | 127.05 | 64.03  | S   | 731.44 | 366.22 | 714.41 | 357.71 | 713.43 | 357.22 | 6     |
| 3  | 258.14 | 129.58 |        |        | 240.13 | 120.57 | I   | 644.41 | 322.71 | 627.38 | 314.19 |        |        | 5     |
| 4  | 373.17 | 187.09 | 356.15 | 178.58 | 355.16 | 178.08 | N   | 531.32 | 266.17 | 514.30 | 257.65 |        |        | 4     |
| 5  | 486.26 | 243.63 | 469.23 | 235.12 | 468.25 | 234.63 | L   | 416.30 | 208.65 | 399.27 | 200.14 |        |        | 3     |
| 6  | 614.35 | 307.68 | 597.32 | 299.17 | 596.34 | 298.67 | K   | 303.21 | 152.11 | 286.19 | 143.60 |        |        | 2     |
| 7  |        |        |        |        |        |        | R   | 175.12 | 88.06  | 158.09 | 79.55  |        |        | 1     |

Query 2457 Hit 1

MS/MS Fragmentation of **KEELMFFLWAPELAPLK**

Found in **sp|P60981|DEST\_HUMAN**, Destrin OS=Homo sapiens GN=DSTN PE=1 SV=3

Match to Query 2457: 2493.401 from (832.1409, 3+)

Title: 1152: Scan 2887 (rt=73.224, f=3, i=407) [D:\lab212\membrane\Grace\20120214\_iTRAQ\_1.raw]

Data File:

**Monoisotopic mass of neutral peptide Mr(calc): 2493.401**

**Variable modifications:**

**K1** iTRAQ4plex (K)

**K17** iTRAQ4plex (K)

**Ions Score: 46.45 Expect: 0.010**

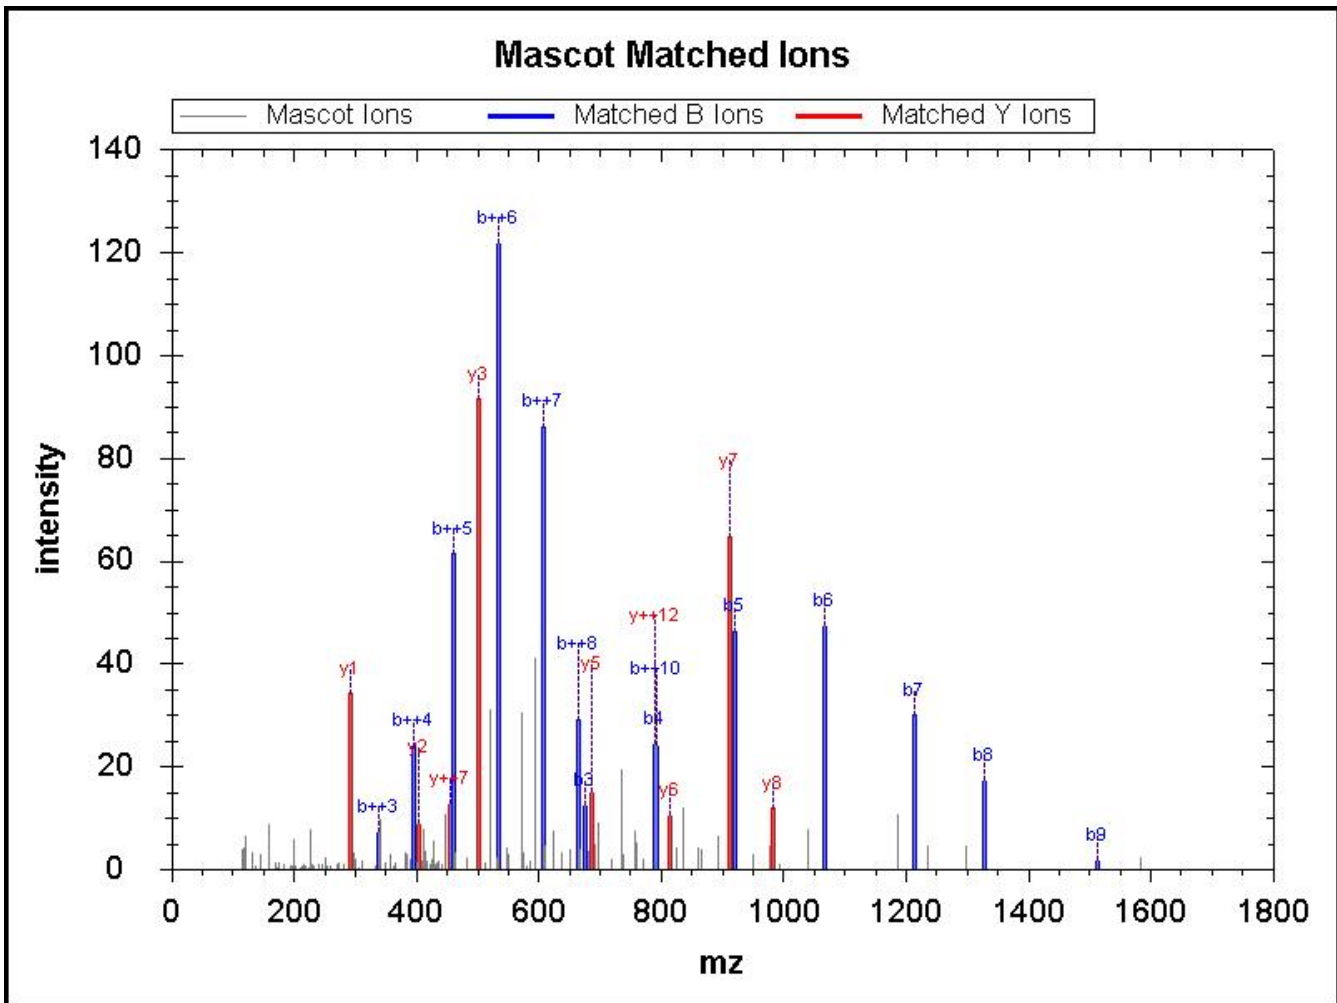

| No | b               | b++           | b*       | b*++     | b0       | b0++     | Seq | y             | y++           | y*       | y*++     | y0       | y0++     | RevNo |
|----|-----------------|---------------|----------|----------|----------|----------|-----|---------------|---------------|----------|----------|----------|----------|-------|
| 1  | 417.31          | 209.16        | 400.28   | 200.64   |          |          | K   |               |               |          |          |          |          | 17    |
| 2  | 546.35          | 273.68        | 529.32   | 265.16   | 528.34   | 264.67   | E   | 2,078.12      | 1,039.56      | 2,061.09 | 1,031.05 | 2,060.10 | 1,030.56 | 16    |
| 3  | <b>675.39</b>   | <b>338.20</b> | 658.36   | 329.69   | 657.38   | 329.19   | E   | 1,949.07      | 975.04        | 1,932.05 | 966.53   | 1,931.06 | 966.03   | 15    |
| 4  | <b>788.48</b>   | <b>394.74</b> | 771.45   | 386.23   | 770.47   | 385.74   | L   | 1,820.03      | 910.52        | 1,803.00 | 902.01   | 1,802.02 | 901.51   | 14    |
| 5  | <b>919.52</b>   | <b>460.26</b> | 902.49   | 451.75   | 901.51   | 451.26   | M   | 1,706.95      | 853.98        | 1,689.92 | 845.46   | 1,688.94 | 844.97   | 13    |
| 6  | <b>1,066.58</b> | <b>533.80</b> | 1,049.56 | 525.28   | 1,048.57 | 524.79   | F   | 1,575.91      | <b>788.46</b> | 1,558.88 | 779.94   | 1,557.89 | 779.45   | 12    |
| 7  | <b>1,213.65</b> | <b>607.33</b> | 1,196.63 | 598.82   | 1,195.64 | 598.32   | F   | 1,428.84      | 714.92        | 1,411.81 | 706.41   | 1,410.83 | 705.92   | 11    |
| 8  | <b>1,326.74</b> | <b>663.87</b> | 1,309.71 | 655.36   | 1,308.73 | 654.87   | L   | 1,281.77      | 641.39        | 1,264.74 | 632.87   | 1,263.76 | 632.38   | 10    |
| 9  | <b>1,512.82</b> | 756.91        | 1,495.79 | 748.40   | 1,494.81 | 747.91   | W   | 1,168.68      | 584.85        | 1,151.66 | 576.33   | 1,150.67 | 575.84   | 9     |
| 10 | 1,583.85        | <b>792.43</b> | 1,566.83 | 783.92   | 1,565.84 | 783.43   | A   | <b>982.61</b> | 491.81        | 965.58   | 483.29   | 964.59   | 482.80   | 8     |
| 11 | 1,680.91        | 840.96        | 1,663.88 | 832.44   | 1,662.90 | 831.95   | P   | <b>911.57</b> | <b>456.29</b> | 894.54   | 447.77   | 893.56   | 447.28   | 7     |
| 12 | 1,809.95        | 905.48        | 1,792.92 | 896.96   | 1,791.94 | 896.47   | E   | <b>814.52</b> | 407.76        | 797.49   | 399.25   | 796.50   | 398.76   | 6     |
| 13 | 1,923.03        | 962.02        | 1,906.01 | 953.51   | 1,905.02 | 953.01   | L   | <b>685.47</b> | 343.24        | 668.45   | 334.73   |          |          | 5     |
| 14 | 1,994.07        | 997.54        | 1,977.04 | 989.03   | 1,976.06 | 988.53   | A   | 572.39        | 286.70        | 555.36   | 278.18   |          |          | 4     |
| 15 | 2,091.12        | 1,046.07      | 2,074.10 | 1,037.55 | 2,073.11 | 1,037.06 | P   | <b>501.35</b> | 251.18        | 484.33   | 242.67   |          |          | 3     |
| 16 | 2,204.21        | 1,102.61      | 2,187.18 | 1,094.09 | 2,186.20 | 1,093.60 | L   | <b>404.30</b> | 202.65        | 387.27   | 194.14   |          |          | 2     |
| 17 |                 |               |          |          |          |          | K   | <b>291.21</b> | 146.11        | 274.19   | 137.60   |          |          | 1     |

Query 2495 Hit 1

MS/MS Fragmentation of **EAPFVPVGIAGFAAIVAYGLYK**

Found in **sp|Q9Y241|HIG1A\_HUMAN**, HIG1 domain family member 1A OS=Homo sapiens GN=HIGD1A PE=1 SV=1

Match to Query 2495: 2540.418from(847.8133,3+)

Title: 1410: Sum of 2 scans in range 3420 (rt=85.2935, f=4, i=939) to 3421 (rt=85.3189, f=4, i=940)

[D:\lab212\membrane\Grace\20120214\_iTRAQ\_2.raw]

Data File:

Monoisotopic mass of neutral peptide Mr(calc): 2540.418

Variable modifications:

K22 iTRAQ4plex (K)

Ions Score: 46.54 Expect: 0.011

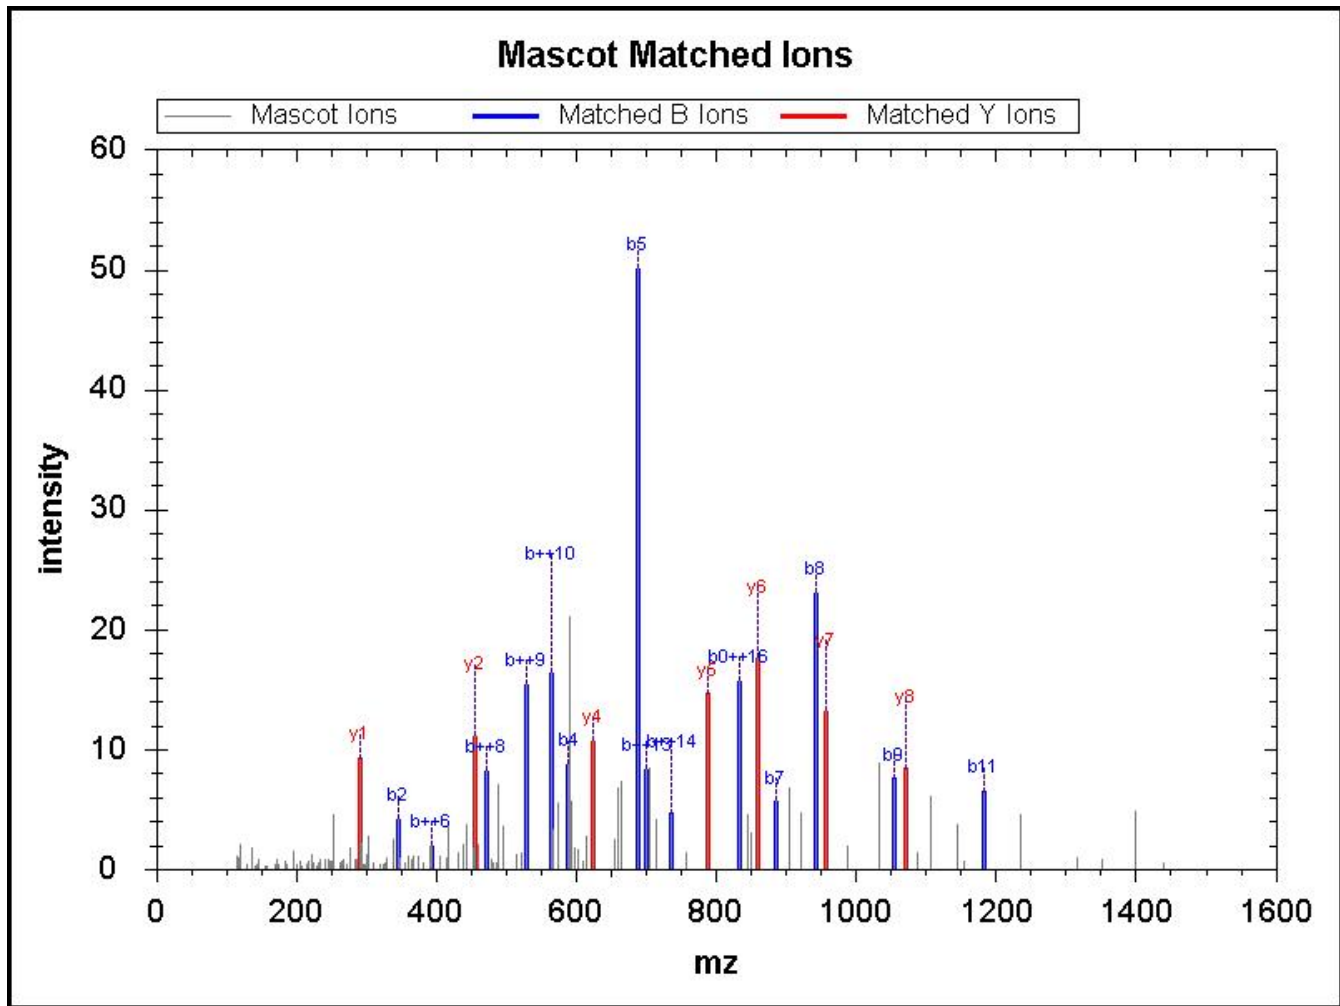

| No | b               | b++           | b0       | b0++          | Seq | y               | y++      | y*       | y*++     | RevNo |
|----|-----------------|---------------|----------|---------------|-----|-----------------|----------|----------|----------|-------|
| 1  | 274.15          | 137.58        | 256.14   | 128.57        | E   |                 |          |          |          | 22    |
| 2  | <b>345.19</b>   | 173.10        | 327.18   | 164.09        | A   | 2,268.29        | 1,134.65 | 2,251.26 | 1,126.14 | 21    |
| 3  | 442.24          | 221.62        | 424.23   | 212.62        | P   | 2,197.25        | 1,099.13 | 2,180.23 | 1,090.62 | 20    |
| 4  | <b>589.31</b>   | 295.16        | 571.30   | 286.15        | F   | 2,100.20        | 1,050.60 | 2,083.17 | 1,042.09 | 19    |
| 5  | <b>688.38</b>   | 344.69        | 670.37   | 335.69        | V   | 1,953.13        | 977.07   | 1,936.11 | 968.56   | 18    |
| 6  | 785.43          | <b>393.22</b> | 767.42   | 384.21        | P   | 1,854.06        | 927.54   | 1,837.04 | 919.02   | 17    |
| 7  | <b>884.50</b>   | 442.75        | 866.49   | 433.75        | V   | 1,757.01        | 879.01   | 1,739.99 | 870.50   | 16    |
| 8  | <b>941.52</b>   | <b>471.26</b> | 923.51   | 462.26        | G   | 1,657.94        | 829.48   | 1,640.92 | 820.96   | 15    |
| 9  | <b>1,054.61</b> | <b>527.81</b> | 1,036.59 | 518.80        | I   | 1,600.92        | 800.96   | 1,583.90 | 792.45   | 14    |
| 10 | 1,125.64        | <b>563.32</b> | 1,107.63 | 554.32        | A   | 1,487.84        | 744.42   | 1,470.81 | 735.91   | 13    |
| 11 | <b>1,182.66</b> | 591.84        | 1,164.65 | 582.83        | G   | 1,416.80        | 708.90   | 1,399.77 | 700.39   | 12    |
| 12 | 1,329.73        | 665.37        | 1,311.72 | 656.36        | F   | 1,359.78        | 680.39   | 1,342.75 | 671.88   | 11    |
| 13 | 1,400.77        | <b>700.89</b> | 1,382.76 | 691.88        | A   | 1,212.71        | 606.86   | 1,195.68 | 598.35   | 10    |
| 14 | 1,471.81        | <b>736.41</b> | 1,453.80 | 727.40        | A   | 1,141.67        | 571.34   | 1,124.65 | 562.83   | 9     |
| 15 | 1,584.89        | 792.95        | 1,566.88 | 783.94        | I   | <b>1,070.64</b> | 535.82   | 1,053.61 | 527.31   | 8     |
| 16 | 1,683.96        | 842.48        | 1,665.95 | <b>833.48</b> | V   | <b>957.55</b>   | 479.28   | 940.53   | 470.77   | 7     |
| 17 | 1,755.00        | 878.00        | 1,736.99 | 869.00        | A   | <b>858.48</b>   | 429.75   | 841.46   | 421.23   | 6     |
| 18 | 1,918.06        | 959.53        | 1,900.05 | 950.53        | Y   | <b>787.45</b>   | 394.23   | 770.42   | 385.71   | 5     |
| 19 | 1,975.08        | 988.04        | 1,957.07 | 979.04        | G   | <b>624.38</b>   | 312.70   | 607.36   | 304.18   | 4     |
| 20 | 2,088.17        | 1,044.59      | 2,070.15 | 1,035.58      | L   | 567.36          | 284.18   | 550.34   | 275.67   | 3     |

|    |          |          |          |          |   |        |        |        |        |   |
|----|----------|----------|----------|----------|---|--------|--------|--------|--------|---|
| 21 | 2,251.23 | 1,126.12 | 2,233.22 | 1,117.11 | Y | 454.28 | 227.64 | 437.25 | 219.13 | 2 |
| 22 |          |          |          |          | K | 291.21 | 146.11 | 274.19 | 137.60 | 1 |

Query 2219 Hit 1

MS/MS Fragmentation of **DKSFLAMVVDIVQELK**

Found in **sp|O00764|PDXK\_HUMAN**, Pyridoxal kinase OS=Homo sapiens GN=PDXK PE=1 SV=1

Match to Query 2219: 2266.288from(756.4368,3+)

Title: 1408: Sum of 2 scans in range 3475 (rt=86.446, f=3, i=504) to 3476 (rt=86.4714, f=3, i=505)

[D:\lab212\membrane\Grace\20120214\_iTRAQ\_1.raw]

Data File:

**Monoisotopic mass of neutral peptide Mr(calc): 2266.288**

**Variable modifications:**

**K2** iTRAQ4plex (K)

**K16** iTRAQ4plex (K)

**Ions Score: 47.16 Expect: 0.008**

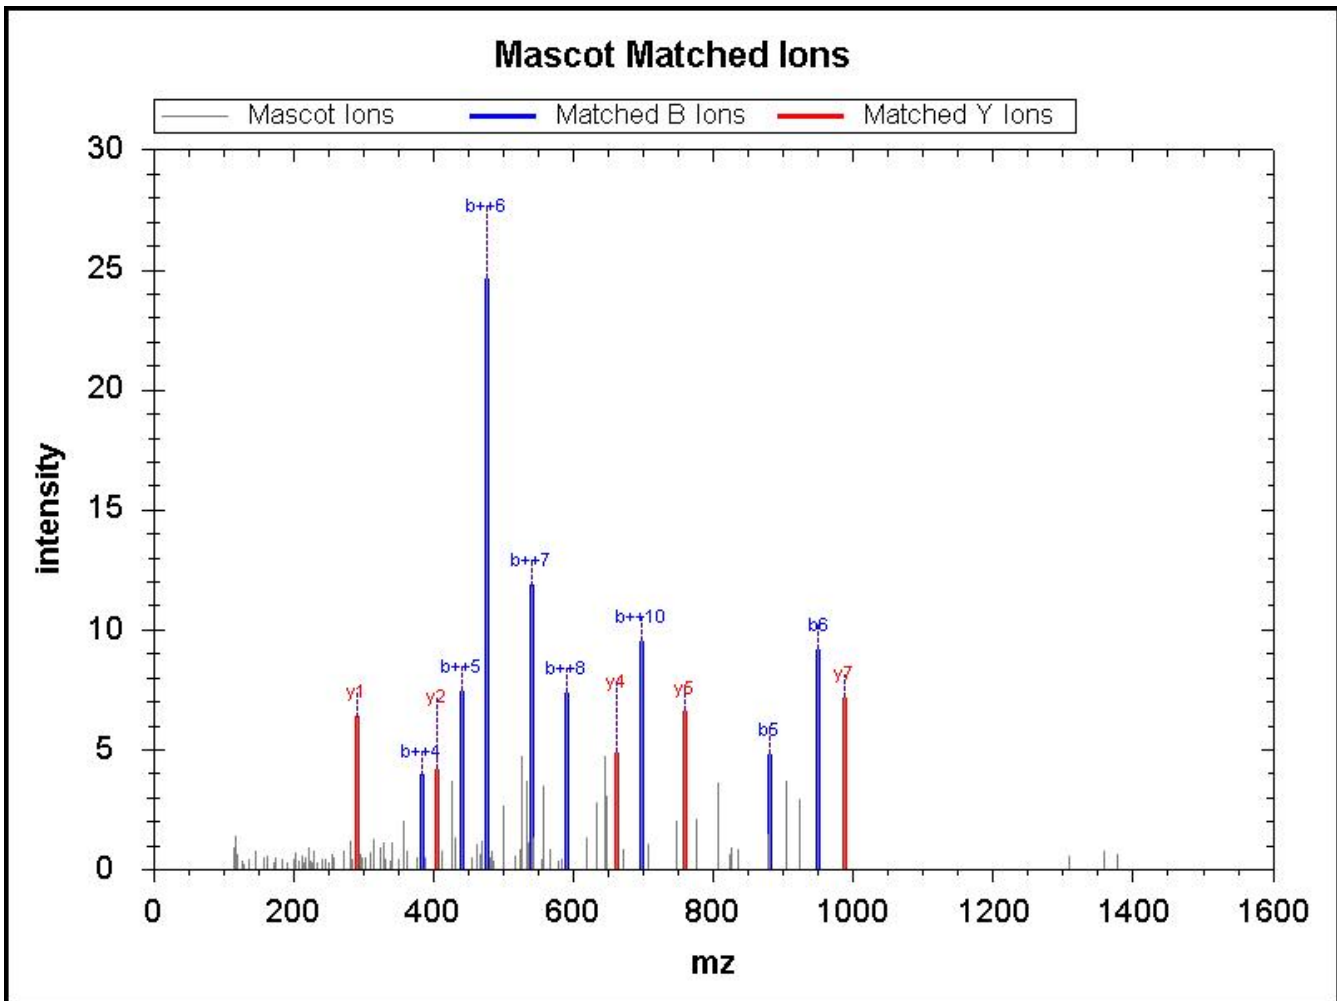

| No | b             | b++           | b*       | b*++   | b0       | b0++   | Seq | y             | y++      | y*       | y*++   | y0       | y0++   | RevNo |
|----|---------------|---------------|----------|--------|----------|--------|-----|---------------|----------|----------|--------|----------|--------|-------|
| 1  | 260.14        | 130.57        |          |        | 242.13   | 121.57 | D   |               |          |          |        |          |        | 16    |
| 2  | 532.33        | 266.67        | 515.31   | 258.16 | 514.32   | 257.67 | K   | 2,008.18      | 1,004.59 | 1,991.15 | 996.08 | 1,990.16 | 995.59 | 15    |
| 3  | 619.37        | 310.19        | 602.34   | 301.67 | 601.35   | 301.18 | S   | 1,735.98      | 868.49   | 1,718.95 | 859.98 | 1,717.97 | 859.49 | 14    |
| 4  | 766.43        | <b>383.72</b> | 749.41   | 375.21 | 748.42   | 374.72 | F   | 1,648.95      | 824.98   | 1,631.92 | 816.46 | 1,630.94 | 815.97 | 13    |
| 5  | <b>879.52</b> | <b>440.26</b> | 862.49   | 431.75 | 861.51   | 431.26 | L   | 1,501.88      | 751.44   | 1,484.85 | 742.93 | 1,483.87 | 742.44 | 12    |
| 6  | <b>950.55</b> | <b>475.78</b> | 933.53   | 467.27 | 932.54   | 466.78 | A   | 1,388.79      | 694.90   | 1,371.77 | 686.39 | 1,370.78 | 685.90 | 11    |
| 7  | 1,081.60      | <b>541.30</b> | 1,064.57 | 532.79 | 1,063.58 | 532.30 | M   | 1,317.76      | 659.38   | 1,300.73 | 650.87 | 1,299.75 | 650.38 | 10    |
| 8  | 1,180.66      | <b>590.84</b> | 1,163.64 | 582.32 | 1,162.65 | 581.83 | V   | 1,186.72      | 593.86   | 1,169.69 | 585.35 | 1,168.71 | 584.86 | 9     |
| 9  | 1,279.73      | 640.37        | 1,262.71 | 631.86 | 1,261.72 | 631.36 | V   | 1,087.65      | 544.33   | 1,070.62 | 535.81 | 1,069.64 | 535.32 | 8     |
| 10 | 1,394.76      | <b>697.88</b> | 1,377.73 | 689.37 | 1,376.75 | 688.88 | D   | <b>988.58</b> | 494.79   | 971.55   | 486.28 | 970.57   | 485.79 | 7     |
| 11 | 1,507.84      | 754.43        | 1,490.82 | 745.91 | 1,489.83 | 745.42 | I   | 873.55        | 437.28   | 856.53   | 428.77 | 855.54   | 428.27 | 6     |



|    |          |        |          |        |          |        |   |        |        |        |        |        |        |   |
|----|----------|--------|----------|--------|----------|--------|---|--------|--------|--------|--------|--------|--------|---|
| 12 | 1,606.91 | 803.96 | 1,589.89 | 795.45 | 1,588.90 | 794.95 | V | 760.47 | 380.74 | 743.44 | 372.22 | 742.46 | 371.73 | 5 |
| 13 | 1,734.97 | 867.99 | 1,717.94 | 859.48 | 1,716.96 | 858.98 | Q | 661.40 | 331.20 | 644.37 | 322.69 | 643.39 | 322.20 | 4 |
| 14 | 1,864.01 | 932.51 | 1,846.99 | 924.00 | 1,846.00 | 923.50 | E | 533.34 | 267.17 | 516.31 | 258.66 | 515.33 | 258.17 | 3 |
| 15 | 1,977.10 | 989.05 | 1,960.07 | 980.54 | 1,959.09 | 980.05 | L | 404.30 | 202.65 | 387.27 | 194.14 |        |        | 2 |
| 16 |          |        |          |        |          |        | K | 291.21 | 146.11 | 274.19 | 137.60 |        |        | 1 |

Query 1862 Hit 1

MS/MS Fragmentation of **VQALTTDISLIFAALK**

Found in **sp|Q6PKG0|LARPI\_HUMAN**, La-related protein 1 OS=Homo sapiens GN=LARP1 PE=1 SV=2

Match to Query 1862: 1991.196from(664.7392,3+)

Title: 1382: Scan 3352 (rt=83.7774, f=2, i=532) [D:\lab212\membrane\Grace\20120214\_iTRAQ\_2.raw]

Data File:

**Monoisotopic mass of neutral peptide Mr(calc): 1991.196**

**Variable modifications:**

**K16** iTRAQ4plex (K)

**Ions Score: 47.54 Expect: 0.005**

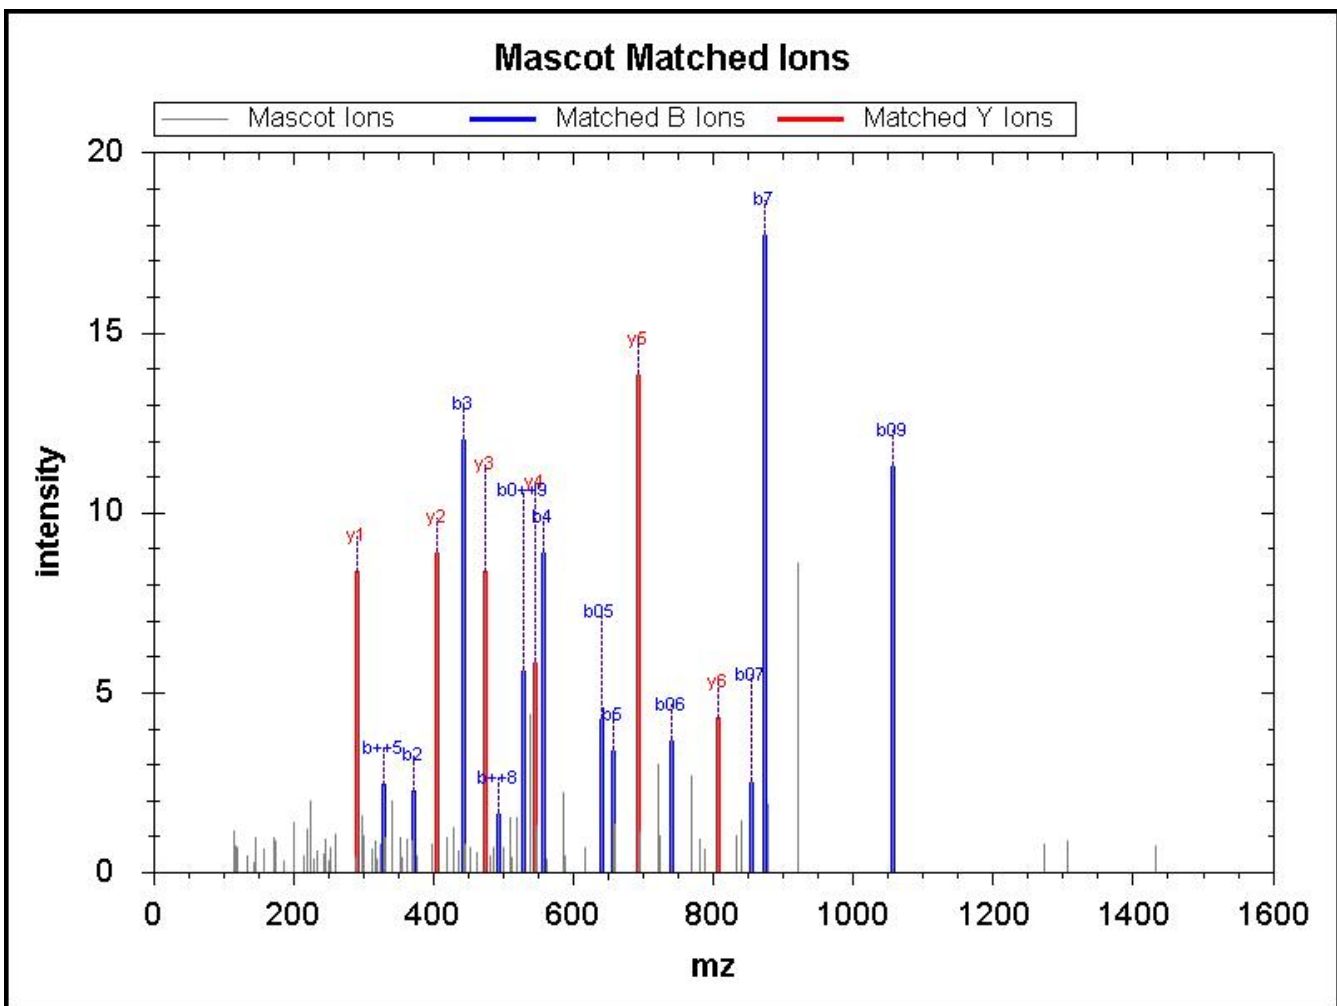

| No | b        | b++    | b*       | b*++   | b0       | b0++   | Seq | y        | y++    | y*       | y*++   | y0       | y0++   | RevNo |
|----|----------|--------|----------|--------|----------|--------|-----|----------|--------|----------|--------|----------|--------|-------|
| 1  | 244.18   | 122.59 |          |        |          |        | V   |          |        |          |        |          |        | 16    |
| 2  | 372.24   | 186.62 | 355.21   | 178.11 |          |        | Q   | 1,749.03 | 875.02 | 1,732.00 | 866.50 | 1,731.02 | 866.01 | 15    |
| 3  | 443.27   | 222.14 | 426.25   | 213.63 |          |        | A   | 1,620.97 | 810.99 | 1,603.94 | 802.48 | 1,602.96 | 801.98 | 14    |
| 4  | 556.36   | 278.68 | 539.33   | 270.17 |          |        | L   | 1,549.93 | 775.47 | 1,532.91 | 766.96 | 1,531.92 | 766.46 | 13    |
| 5  | 657.41   | 329.21 | 640.38   | 320.69 | 639.39   | 320.20 | T   | 1,436.85 | 718.93 | 1,419.82 | 710.41 | 1,418.84 | 709.92 | 12    |
| 6  | 758.45   | 379.73 | 741.43   | 371.22 | 740.44   | 370.72 | T   | 1,335.80 | 668.40 | 1,318.77 | 659.89 | 1,317.79 | 659.40 | 11    |
| 7  | 873.48   | 437.24 | 856.45   | 428.73 | 855.47   | 428.24 | D   | 1,234.75 | 617.88 | 1,217.73 | 609.37 | 1,216.74 | 608.87 | 10    |
| 8  | 986.56   | 493.79 | 969.54   | 485.27 | 968.55   | 484.78 | I   | 1,119.73 | 560.37 | 1,102.70 | 551.85 | 1,101.72 | 551.36 | 9     |
| 9  | 1,073.60 | 537.30 | 1,056.57 | 528.79 | 1,055.59 | 528.30 | S   | 1,006.64 | 503.82 | 989.62   | 495.31 | 988.63   | 494.82 | 8     |

|    |          |        |          |        |          |        |   |        |        |        |        |  |  |   |
|----|----------|--------|----------|--------|----------|--------|---|--------|--------|--------|--------|--|--|---|
| 10 | 1,186.68 | 593.84 | 1,169.65 | 585.33 | 1,168.67 | 584.84 | L | 919.61 | 460.31 | 902.58 | 451.80 |  |  | 7 |
| 11 | 1,299.76 | 650.39 | 1,282.74 | 641.87 | 1,281.75 | 641.38 | I | 806.53 | 403.77 | 789.50 | 395.25 |  |  | 6 |
| 12 | 1,446.83 | 723.92 | 1,429.81 | 715.41 | 1,428.82 | 714.91 | F | 693.44 | 347.22 | 676.41 | 338.71 |  |  | 5 |
| 13 | 1,517.87 | 759.44 | 1,500.84 | 750.93 | 1,499.86 | 750.43 | A | 546.37 | 273.69 | 529.35 | 265.18 |  |  | 4 |
| 14 | 1,588.91 | 794.96 | 1,571.88 | 786.44 | 1,570.90 | 785.95 | A | 475.34 | 238.17 | 458.31 | 229.66 |  |  | 3 |
| 15 | 1,701.99 | 851.50 | 1,684.96 | 842.99 | 1,683.98 | 842.49 | L | 404.30 | 202.65 | 387.27 | 194.14 |  |  | 2 |
| 16 |          |        |          |        |          |        | K | 291.21 | 146.11 | 274.19 | 137.60 |  |  | 1 |

Query 2827 Hit 1

MS/MS Fragmentation of **KLEAADLVIFQFPLQWFGVPAILK**

Found in **sp|P15559|NQO1\_HUMAN**, NAD(P)H dehydrogenase [quinone] 1 OS=Homo sapiens GN=NQO1 PE=1 SV=1

Match to Query 2827: 3174.85from(794.7199,4+)

Title: 1393: Sum of 2 scans in range 3429 (rt=85.4304, f=4, i=956) to 3430 (rt=85.4558, f=4, i=957)

[D:\lab212\membrane\Grace\20120214\_iTRAQ\_1.raw]

Data File:

**Monoisotopic mass of neutral peptide Mr(calc): 3174.85**

**Variable modifications:**

**K1** iTRAQ4plex (K)

**K24** iTRAQ4plex (K)

**Ions Score: 47.58 Expect: 0.002**

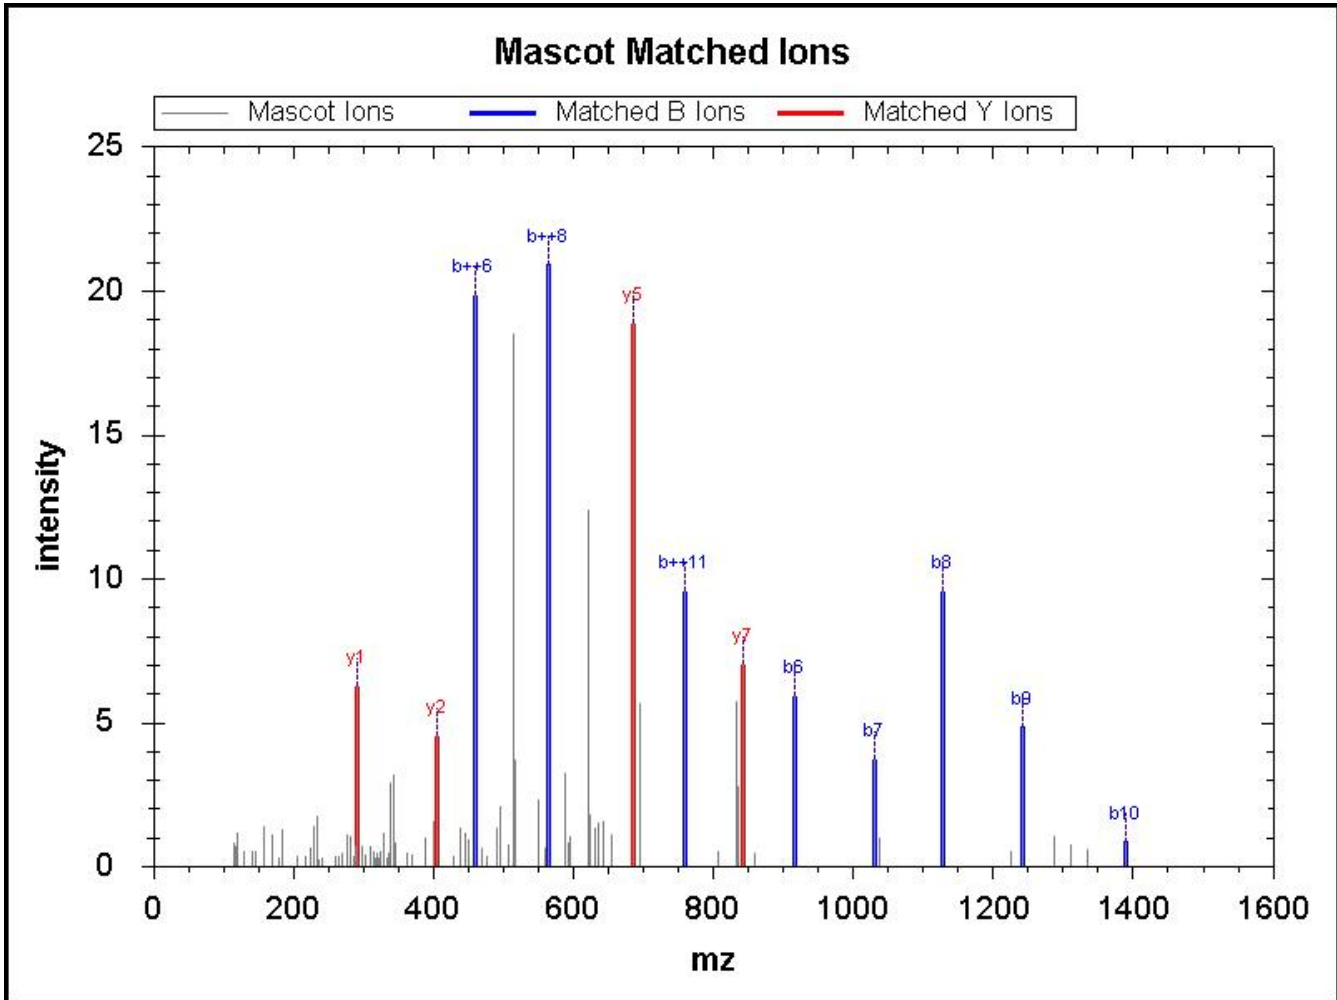

| No | b      | b++    | b*     | b*++   | b0     | b0++   | Seq | y        | y++      | y*       | y*++     | y0       | y0++     | RevNo |
|----|--------|--------|--------|--------|--------|--------|-----|----------|----------|----------|----------|----------|----------|-------|
| 1  | 417.31 | 209.16 | 400.28 | 200.64 |        |        | K   |          |          |          |          |          |          | 24    |
| 2  | 530.39 | 265.70 | 513.36 | 257.19 |        |        | L   | 2,759.57 | 1,380.29 | 2,742.54 | 1,371.77 | 2,741.55 | 1,371.28 | 23    |
| 3  | 659.43 | 330.22 | 642.41 | 321.71 | 641.42 | 321.21 | E   | 2,646.48 | 1,323.74 | 2,629.45 | 1,315.23 | 2,628.47 | 1,314.74 | 22    |
| 4  | 730.47 | 365.74 | 713.44 | 357.23 | 712.46 | 356.73 | A   | 2,517.44 | 1,259.22 | 2,500.41 | 1,250.71 | 2,499.43 | 1,250.22 | 21    |
| 5  | 801.51 | 401.26 | 784.48 | 392.74 | 783.50 | 392.25 | A   | 2,446.40 | 1,223.70 | 2,429.38 | 1,215.19 | 2,428.39 | 1,214.70 | 20    |
| 6  | 916.53 | 458.77 | 899.51 | 450.26 | 898.52 | 449.77 | D   | 2,375.36 | 1,188.19 | 2,358.34 | 1,179.67 | 2,357.35 | 1,179.18 | 19    |

|    |          |          |          |          |          |          |   |          |          |          |          |  |  |    |
|----|----------|----------|----------|----------|----------|----------|---|----------|----------|----------|----------|--|--|----|
| 7  | 1,029.62 | 515.31   | 1,012.59 | 506.80   | 1,011.61 | 506.31   | L | 2,260.34 | 1,130.67 | 2,243.31 | 1,122.16 |  |  | 18 |
| 8  | 1,128.69 | 564.85   | 1,111.66 | 556.33   | 1,110.68 | 555.84   | V | 2,147.25 | 1,074.13 | 2,130.23 | 1,065.62 |  |  | 17 |
| 9  | 1,241.77 | 621.39   | 1,224.74 | 612.88   | 1,223.76 | 612.38   | I | 2,048.19 | 1,024.60 | 2,031.16 | 1,016.08 |  |  | 16 |
| 10 | 1,388.84 | 694.92   | 1,371.81 | 686.41   | 1,370.83 | 685.92   | F | 1,935.10 | 968.05   | 1,918.07 | 959.54   |  |  | 15 |
| 11 | 1,516.90 | 758.95   | 1,499.87 | 750.44   | 1,498.89 | 749.95   | Q | 1,788.03 | 894.52   | 1,771.01 | 886.01   |  |  | 14 |
| 12 | 1,663.97 | 832.49   | 1,646.94 | 823.97   | 1,645.96 | 823.48   | F | 1,659.97 | 830.49   | 1,642.95 | 821.98   |  |  | 13 |
| 13 | 1,761.02 | 881.01   | 1,743.99 | 872.50   | 1,743.01 | 872.01   | P | 1,512.91 | 756.96   | 1,495.88 | 748.44   |  |  | 12 |
| 14 | 1,874.10 | 937.56   | 1,857.08 | 929.04   | 1,856.09 | 928.55   | L | 1,415.85 | 708.43   | 1,398.83 | 699.92   |  |  | 11 |
| 15 | 2,002.16 | 1,001.58 | 1,985.14 | 993.07   | 1,984.15 | 992.58   | Q | 1,302.77 | 651.89   | 1,285.74 | 643.37   |  |  | 10 |
| 16 | 2,188.24 | 1,094.62 | 2,171.21 | 1,086.11 | 2,170.23 | 1,085.62 | W | 1,174.71 | 587.86   | 1,157.68 | 579.35   |  |  | 9  |
| 17 | 2,335.31 | 1,168.16 | 2,318.28 | 1,159.64 | 2,317.30 | 1,159.15 | F | 988.63   | 494.82   | 971.60   | 486.31   |  |  | 8  |
| 18 | 2,392.33 | 1,196.67 | 2,375.30 | 1,188.16 | 2,374.32 | 1,187.66 | G | 841.56   | 421.28   | 824.54   | 412.77   |  |  | 7  |
| 19 | 2,491.40 | 1,246.20 | 2,474.37 | 1,237.69 | 2,473.39 | 1,237.20 | V | 784.54   | 392.77   | 767.51   | 384.26   |  |  | 6  |
| 20 | 2,588.45 | 1,294.73 | 2,571.43 | 1,286.22 | 2,570.44 | 1,285.72 | P | 685.47   | 343.24   | 668.45   | 334.73   |  |  | 5  |
| 21 | 2,659.49 | 1,330.25 | 2,642.46 | 1,321.73 | 2,641.48 | 1,321.24 | A | 588.42   | 294.71   | 571.39   | 286.20   |  |  | 4  |
| 22 | 2,772.57 | 1,386.79 | 2,755.55 | 1,378.28 | 2,754.56 | 1,377.78 | I | 517.38   | 259.20   | 500.36   | 250.68   |  |  | 3  |
| 23 | 2,885.66 | 1,443.33 | 2,868.63 | 1,434.82 | 2,867.65 | 1,434.33 | L | 404.30   | 202.65   | 387.27   | 194.14   |  |  | 2  |
| 24 |          |          |          |          |          |          | K | 291.21   | 146.11   | 274.19   | 137.60   |  |  | 1  |

Query 721 Hit 1

MS/MS Fragmentation of **LYLILDFLR**

Found in **sp|Q15418|KS6A1\_HUMAN**, Ribosomal protein S6 kinase alpha-1 OS=Homo sapiens GN=RPS6KA1 PE=1 SV=2

Match to Query 721: 1308.791from(655.4027,2+)

Title: 1277: Scan 3160 (rt=79.3751, f=3, i=451) [D:\lab212\membrane\Grace\20120214\_iTRAQ\_1.raw]

Data File:

**Monoisotopic mass of neutral peptide Mr(calc): 1308.791**

**Variable modifications:**

**Ions Score: 48.55 Expect: 0.007**

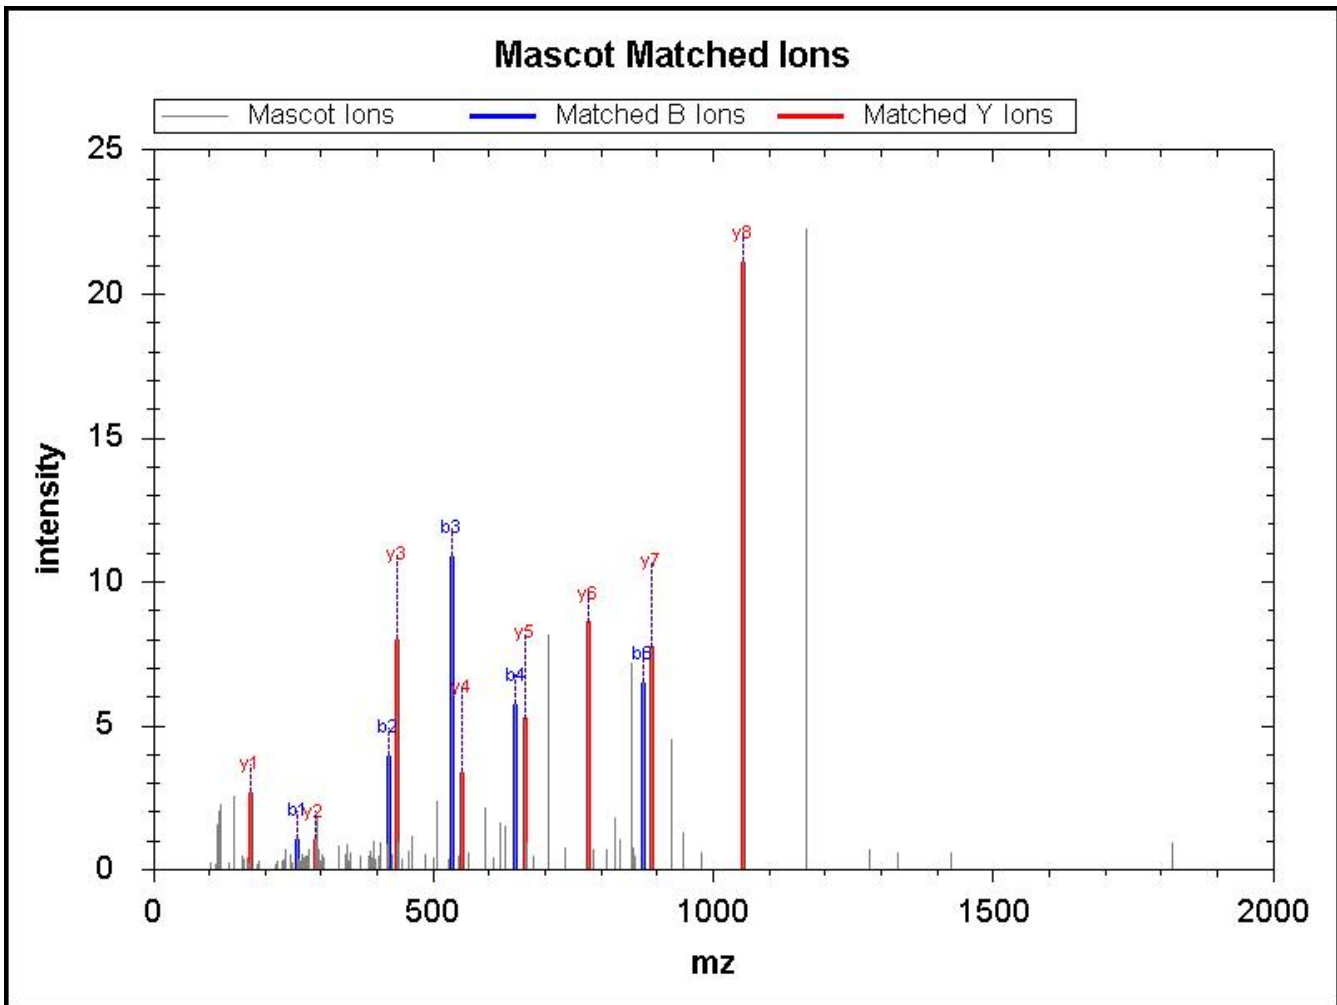

| No | b             | b++    | b0       | b0++   | Seq | y               | y++    | y*       | y*++   | y0       | y0++   | RevNo |
|----|---------------|--------|----------|--------|-----|-----------------|--------|----------|--------|----------|--------|-------|
| 1  | <b>258.19</b> | 129.60 |          |        | L   |                 |        |          |        |          |        | 9     |
| 2  | <b>421.26</b> | 211.13 |          |        | Y   | <b>1,052.61</b> | 526.81 | 1,035.59 | 518.30 | 1,034.60 | 517.81 | 8     |
| 3  | <b>534.34</b> | 267.67 |          |        | L   | <b>889.55</b>   | 445.28 | 872.52   | 436.77 | 871.54   | 436.27 | 7     |
| 4  | <b>647.42</b> | 324.22 |          |        | I   | <b>776.47</b>   | 388.74 | 759.44   | 380.22 | 758.46   | 379.73 | 6     |
| 5  | 760.51        | 380.76 |          |        | L   | <b>663.38</b>   | 332.19 | 646.36   | 323.68 | 645.37   | 323.19 | 5     |
| 6  | <b>875.54</b> | 438.27 | 857.53   | 429.27 | D   | <b>550.30</b>   | 275.65 | 533.27   | 267.14 | 532.29   | 266.65 | 4     |
| 7  | 1,022.60      | 511.81 | 1,004.59 | 502.80 | F   | <b>435.27</b>   | 218.14 | 418.24   | 209.63 |          |        | 3     |
| 8  | 1,135.69      | 568.35 | 1,117.68 | 559.34 | L   | <b>288.20</b>   | 144.61 | 271.18   | 136.09 |          |        | 2     |
| 9  |               |        |          |        | R   | <b>175.12</b>   | 88.06  | 158.09   | 79.55  |          |        | 1     |

Query 2156 Hit 1

MS/MS Fragmentation of **SIVSELAGLLSAMEYVQK**

Found in **sp|P40763|STAT3\_HUMAN**, Signal transducer and activator of transcription 3 OS=Homo sapiens GN=STAT3 PE=1 SV=2

Match to Query 2156: 2225.225 from (742.749, 3+)

Title: 1430: Scan 3482 (rt=86.6492, f=3, i=524) [D:\lab212\membrane\Grace\20120214\_iTRAQ\_2.raw]

Data File:

**Monoisotopic mass of neutral peptide Mr(calc): 2225.225**

**Variable modifications:**

**K18** :iTRAQ4plex (K)

**Ions Score: 48.6 Expect: 0.009**

### Mascot Matched Ions

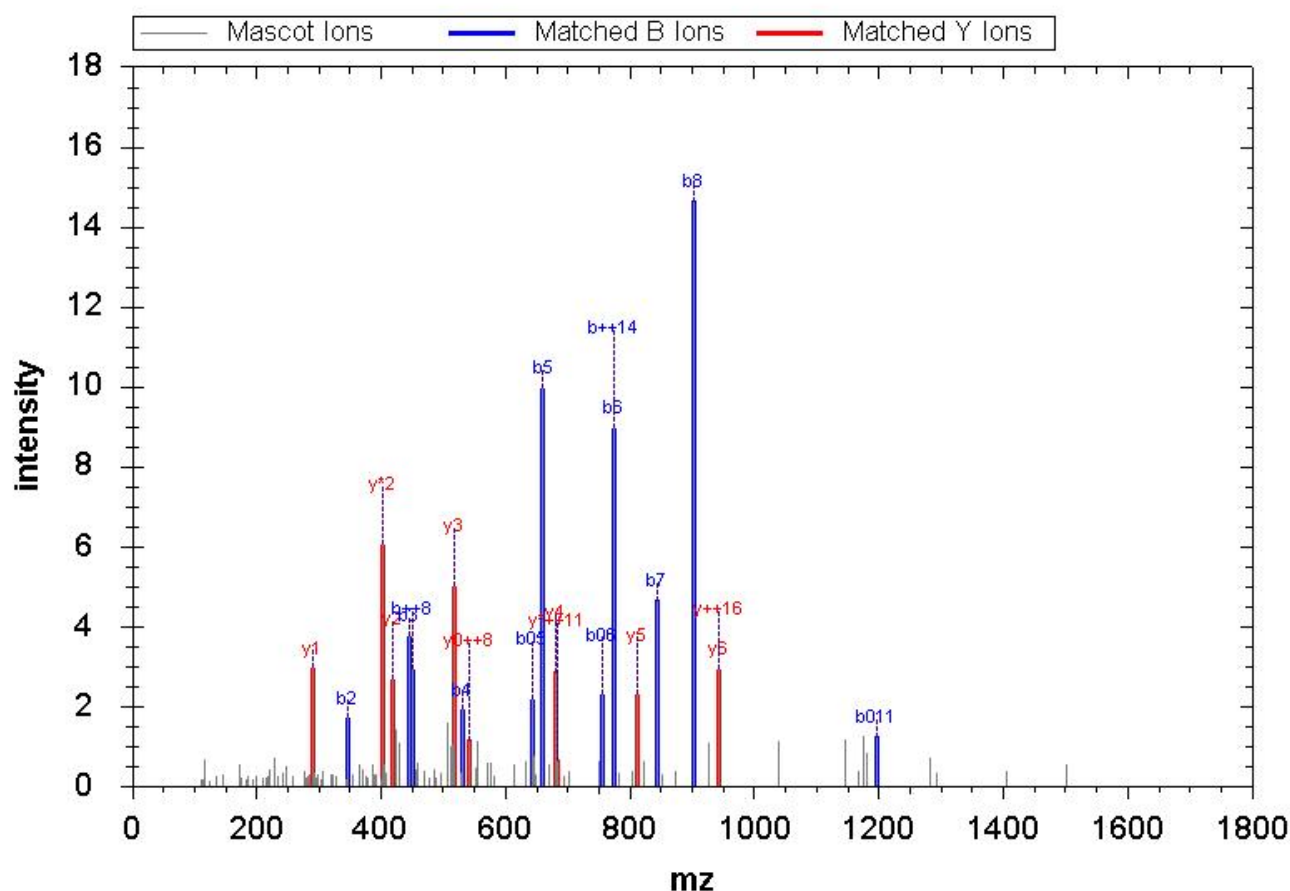

| No | b        | b++    | b*       | b*++   | b0       | b0++   | Seq | y        | y++    | y*       | y*++   | y0       | y0++   | RevNo |
|----|----------|--------|----------|--------|----------|--------|-----|----------|--------|----------|--------|----------|--------|-------|
| 1  | 232.14   | 116.57 |          |        | 214.13   | 107.57 | S   |          |        |          |        |          |        | 18    |
| 2  | 345.23   | 173.12 |          |        | 327.21   | 164.11 | I   | 1,995.10 | 998.05 | 1,978.07 | 989.54 | 1,977.08 | 989.05 | 17    |
| 3  | 444.29   | 222.65 |          |        | 426.28   | 213.65 | V   | 1,882.01 | 941.51 | 1,864.98 | 933.00 | 1,864.00 | 932.50 | 16    |
| 4  | 531.33   | 266.17 |          |        | 513.32   | 257.16 | S   | 1,782.94 | 891.98 | 1,765.92 | 883.46 | 1,764.93 | 882.97 | 15    |
| 5  | 660.37   | 330.69 |          |        | 642.36   | 321.68 | E   | 1,695.91 | 848.46 | 1,678.88 | 839.95 | 1,677.90 | 839.45 | 14    |
| 6  | 773.45   | 387.23 |          |        | 755.44   | 378.22 | L   | 1,566.87 | 783.94 | 1,549.84 | 775.42 | 1,548.86 | 774.93 | 13    |
| 7  | 844.49   | 422.75 |          |        | 826.48   | 413.74 | A   | 1,453.78 | 727.40 | 1,436.76 | 718.88 | 1,435.77 | 718.39 | 12    |
| 8  | 901.51   | 451.26 |          |        | 883.50   | 442.25 | G   | 1,382.75 | 691.88 | 1,365.72 | 683.36 | 1,364.74 | 682.87 | 11    |
| 9  | 1,014.60 | 507.80 |          |        | 996.58   | 498.80 | L   | 1,325.73 | 663.37 | 1,308.70 | 654.85 | 1,307.71 | 654.36 | 10    |
| 10 | 1,127.68 | 564.34 |          |        | 1,109.67 | 555.34 | L   | 1,212.64 | 606.82 | 1,195.61 | 598.31 | 1,194.63 | 597.82 | 9     |
| 11 | 1,214.71 | 607.86 |          |        | 1,196.70 | 598.85 | S   | 1,099.56 | 550.28 | 1,082.53 | 541.77 | 1,081.55 | 541.28 | 8     |
| 12 | 1,285.75 | 643.38 |          |        | 1,267.74 | 634.37 | A   | 1,012.53 | 506.77 | 995.50   | 498.25 | 994.51   | 497.76 | 7     |
| 13 | 1,416.79 | 708.90 |          |        | 1,398.78 | 699.89 | M   | 941.49   | 471.25 | 924.46   | 462.73 | 923.48   | 462.24 | 6     |
| 14 | 1,545.83 | 773.42 |          |        | 1,527.82 | 764.41 | E   | 810.45   | 405.73 | 793.42   | 397.21 | 792.44   | 396.72 | 5     |
| 15 | 1,708.89 | 854.95 |          |        | 1,690.88 | 845.95 | Y   | 681.41   | 341.21 | 664.38   | 332.69 |          |        | 4     |
| 16 | 1,807.96 | 904.49 |          |        | 1,789.95 | 895.48 | V   | 518.34   | 259.67 | 501.32   | 251.16 |          |        | 3     |
| 17 | 1,936.02 | 968.51 | 1,919.00 | 960.00 | 1,918.01 | 959.51 | Q   | 419.27   | 210.14 | 402.25   | 201.63 |          |        | 2     |
| 18 |          |        |          |        |          |        | K   | 291.21   | 146.11 | 274.19   | 137.60 |          |        | 1     |

Query 854 Hit 1

MS/MS Fragmentation of **IETIEVMEDR**

Found in **sp|P51991|ROA3\_HUMAN**, Heterogeneous nuclear ribonucleoprotein A3 OS=Homo sapiens GN=HNRNPA3 PE=1 SV=2  
Match to Query 854: 1377.7from(689.8572,2+)

Title: 543: Sum of 2 scans in range 1617 (rt=44.6101, f=4, i=374) to 1618 (rt=44.6355, f=4, i=375)

[D:\lab212\membrane\Grace\20120214\_iTRAQ\_1.raw]

Data File:

**Monoisotopic mass of neutral peptide Mr(calc): 1377.7**

**Variable modifications:**

**Ions Score: 49.11 Expect: 0.011**

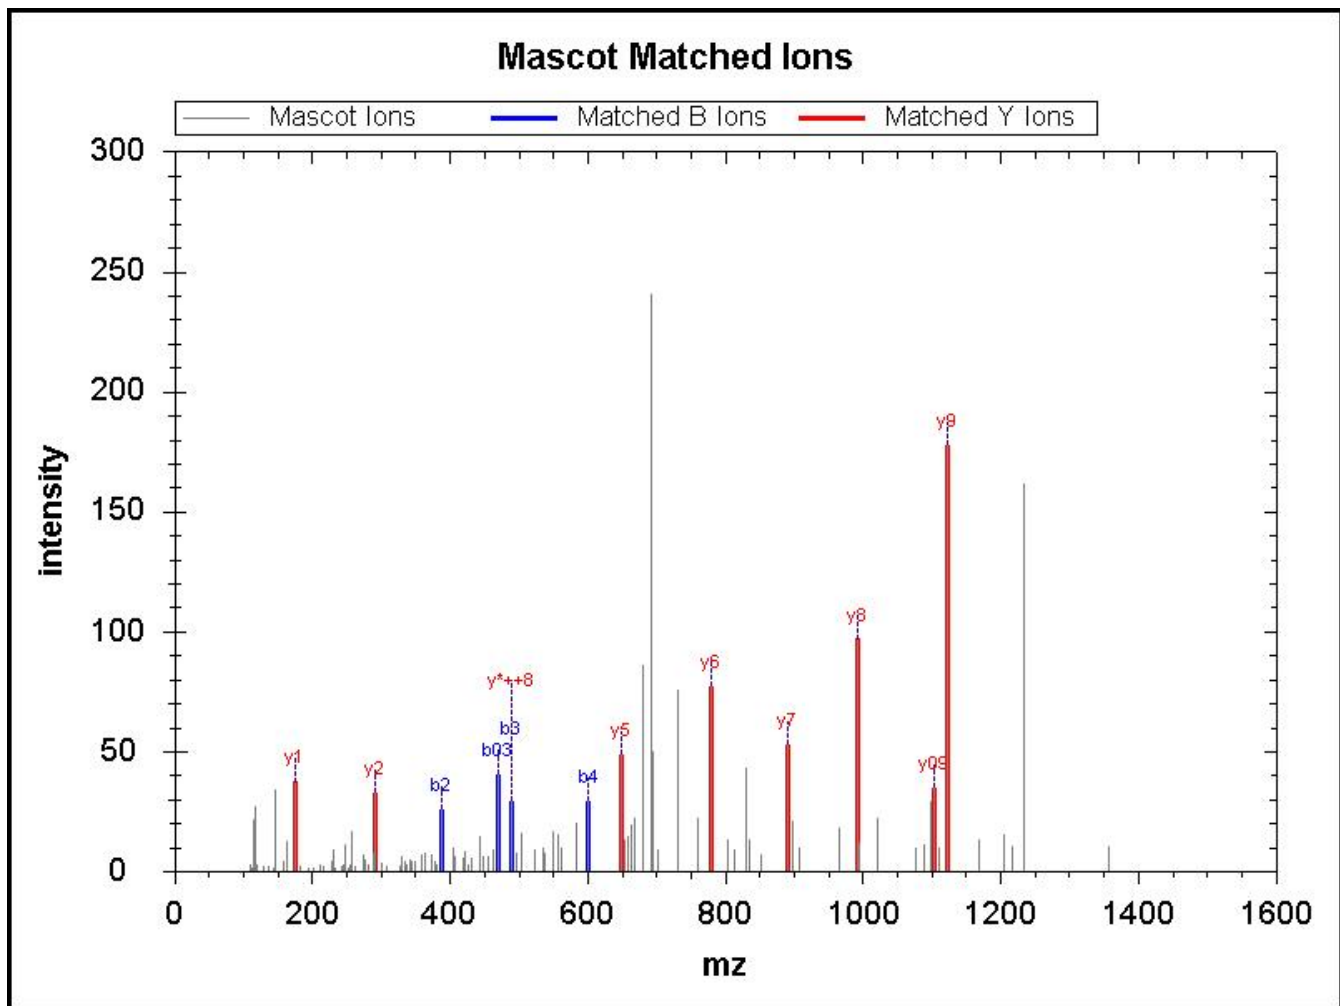

| No | b        | b++    | b0       | b0++   | Seq | y        | y++    | y*       | y*++   | y0       | y0++   | RevNo |
|----|----------|--------|----------|--------|-----|----------|--------|----------|--------|----------|--------|-------|
| 1  | 258.19   | 129.60 |          |        | I   |          |        |          |        |          |        | 10    |
| 2  | 387.24   | 194.12 | 369.23   | 185.12 | E   | 1,121.51 | 561.26 | 1,104.49 | 552.75 | 1,103.50 | 552.26 | 9     |
| 3  | 488.28   | 244.65 | 470.27   | 235.64 | T   | 992.47   | 496.74 | 975.45   | 488.23 | 974.46   | 487.73 | 8     |
| 4  | 601.37   | 301.19 | 583.36   | 292.18 | I   | 891.42   | 446.22 | 874.40   | 437.70 | 873.41   | 437.21 | 7     |
| 5  | 730.41   | 365.71 | 712.40   | 356.70 | E   | 778.34   | 389.67 | 761.31   | 381.16 | 760.33   | 380.67 | 6     |
| 6  | 829.48   | 415.24 | 811.47   | 406.24 | V   | 649.30   | 325.15 | 632.27   | 316.64 | 631.29   | 316.15 | 5     |
| 7  | 960.52   | 480.76 | 942.51   | 471.76 | M   | 550.23   | 275.62 | 533.20   | 267.10 | 532.22   | 266.61 | 4     |
| 8  | 1,089.56 | 545.28 | 1,071.55 | 536.28 | E   | 419.19   | 210.10 | 402.16   | 201.58 | 401.18   | 201.09 | 3     |
| 9  | 1,204.59 | 602.80 | 1,186.58 | 593.79 | D   | 290.15   | 145.58 | 273.12   | 137.06 | 272.14   | 136.57 | 2     |
| 10 |          |        |          |        | R   | 175.12   | 88.06  | 158.09   | 79.55  |          |        | 1     |

Query 1816 Hit 1

MS/MS Fragmentation of **YLMEEDEDAYKK**

Found in **sp|P46777|R1L5\_HUMAN**, 60S ribosomal protein L5 OS=Homo sapiens GN=RPL5 PE=1 SV=3

Match to Query 1816: 1964.98from(656.0007,3+)

Title: 378: Sum of 2 scans in range 1270 (rt=36.7906, f=4, i=262) to 1271 (rt=36.8161, f=4, i=263)

[D:\lab212\membrane\Grace\20120214\_iTRAQ\_1.raw]

Data File:

**Monoisotopic mass of neutral peptide Mr(calc): 1964.98**

**Variable modifications:**

**K11** iTRAQ4plex (K)

**K12** iTRAQ4plex (K)

Ions Score: 49.12 Expect: 0.011

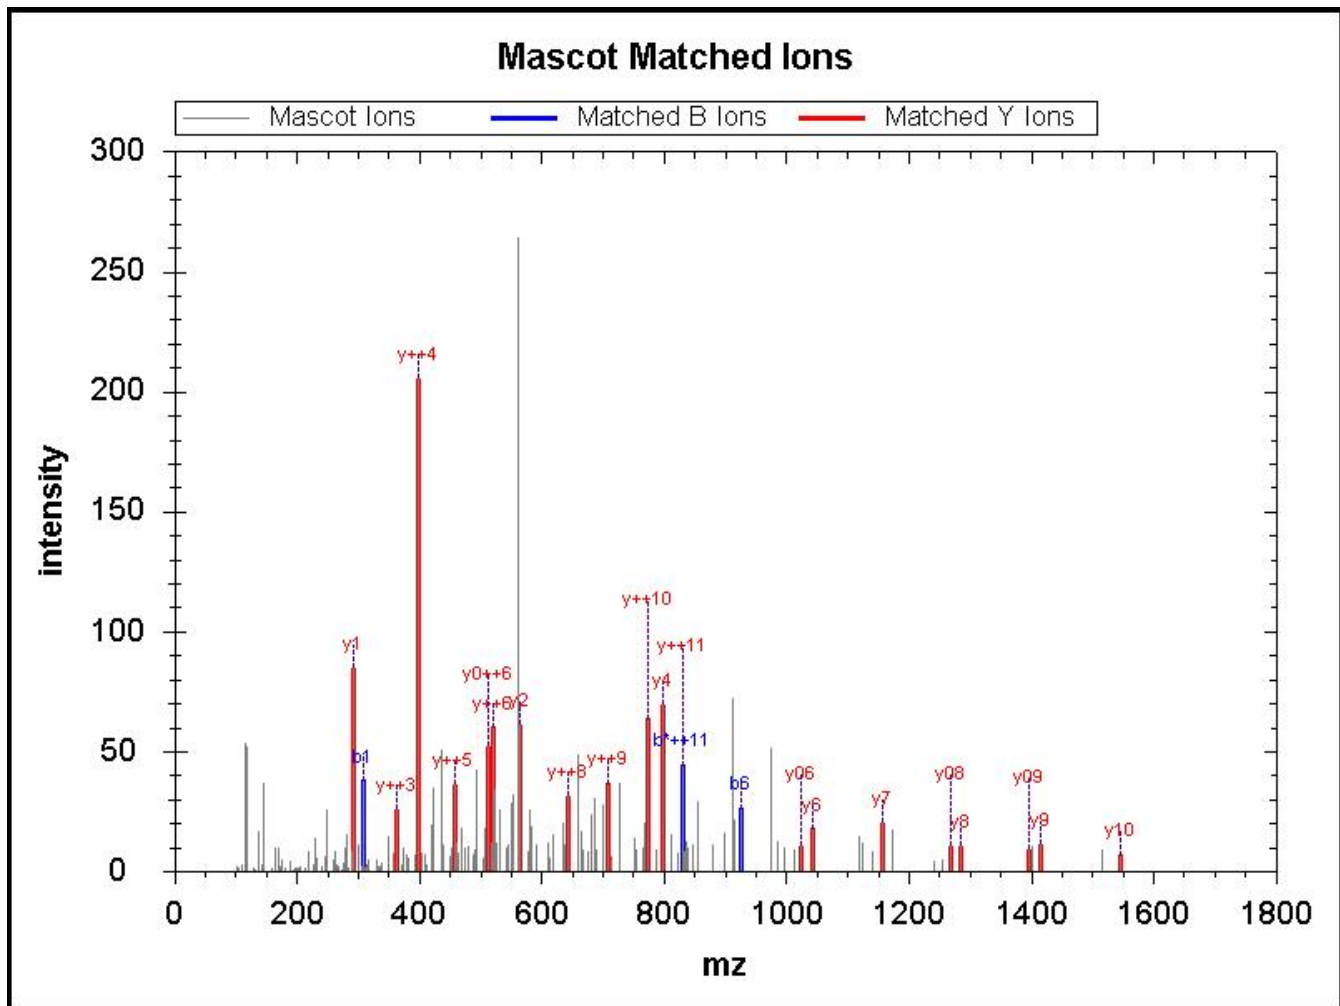

| No | b        | b++    | b*       | b*++   | b0       | b0++   | Seq | y        | y++    | y*       | y*++   | y0       | y0++   | RevNo |
|----|----------|--------|----------|--------|----------|--------|-----|----------|--------|----------|--------|----------|--------|-------|
| 1  | 308.17   | 154.59 |          |        |          |        | Y   |          |        |          |        |          |        | 12    |
| 2  | 421.26   | 211.13 |          |        |          |        | L   | 1,658.82 | 829.91 | 1,641.79 | 821.40 | 1,640.81 | 820.91 | 11    |
| 3  | 552.30   | 276.65 |          |        |          |        | M   | 1,545.73 | 773.37 | 1,528.71 | 764.86 | 1,527.72 | 764.37 | 10    |
| 4  | 681.34   | 341.17 |          |        | 663.33   | 332.17 | E   | 1,414.69 | 707.85 | 1,397.67 | 699.34 | 1,396.68 | 698.85 | 9     |
| 5  | 810.38   | 405.69 |          |        | 792.37   | 396.69 | E   | 1,285.65 | 643.33 | 1,268.62 | 634.82 | 1,267.64 | 634.32 | 8     |
| 6  | 925.41   | 463.21 |          |        | 907.40   | 454.20 | D   | 1,156.61 | 578.81 | 1,139.58 | 570.29 | 1,138.60 | 569.80 | 7     |
| 7  | 1,054.45 | 527.73 |          |        | 1,036.44 | 518.72 | E   | 1,041.58 | 521.29 | 1,024.56 | 512.78 | 1,023.57 | 512.29 | 6     |
| 8  | 1,169.48 | 585.24 |          |        | 1,151.47 | 576.24 | D   | 912.54   | 456.77 | 895.51   | 448.26 | 894.53   | 447.77 | 5     |
| 9  | 1,240.52 | 620.76 |          |        | 1,222.51 | 611.76 | A   | 797.51   | 399.26 | 780.49   | 390.75 |          |        | 4     |
| 10 | 1,403.58 | 702.29 |          |        | 1,385.57 | 693.29 | Y   | 726.48   | 363.74 | 709.45   | 355.23 |          |        | 3     |
| 11 | 1,675.78 | 838.39 | 1,658.75 | 829.88 | 1,657.77 | 829.39 | K   | 563.41   | 282.21 | 546.39   | 273.70 |          |        | 2     |
| 12 |          |        |          |        |          |        | K   | 291.21   | 146.11 | 274.19   | 137.60 |          |        | 1     |

Query 2067 Hit 1

MS/MS Fragmentation of **GGPNHITLADIVKDPVSR**

Found in **sp|P68400|CSK21\_HUMAN**, Casein kinase II subunit alpha OS=Homo sapiens GN=CSNK2A1 PE=1 SV=1

Match to Query 2067: 2152.236from(718.4191,3+)

Title: 844: Scan 2242 (rt=58.6908, f=3, i=303) [D:\lab212\membrane\Grace\20120214\_ iTRAQ\_1.raw]

Data File:

**Monoisotopic mass of neutral peptide Mr(calc): 2152.236**

**Variable modifications:**

**K13** iTRAQ4plex (K)

**Ions Score: 49.49 Expect: 0.005**

### Mascot Matched Ions

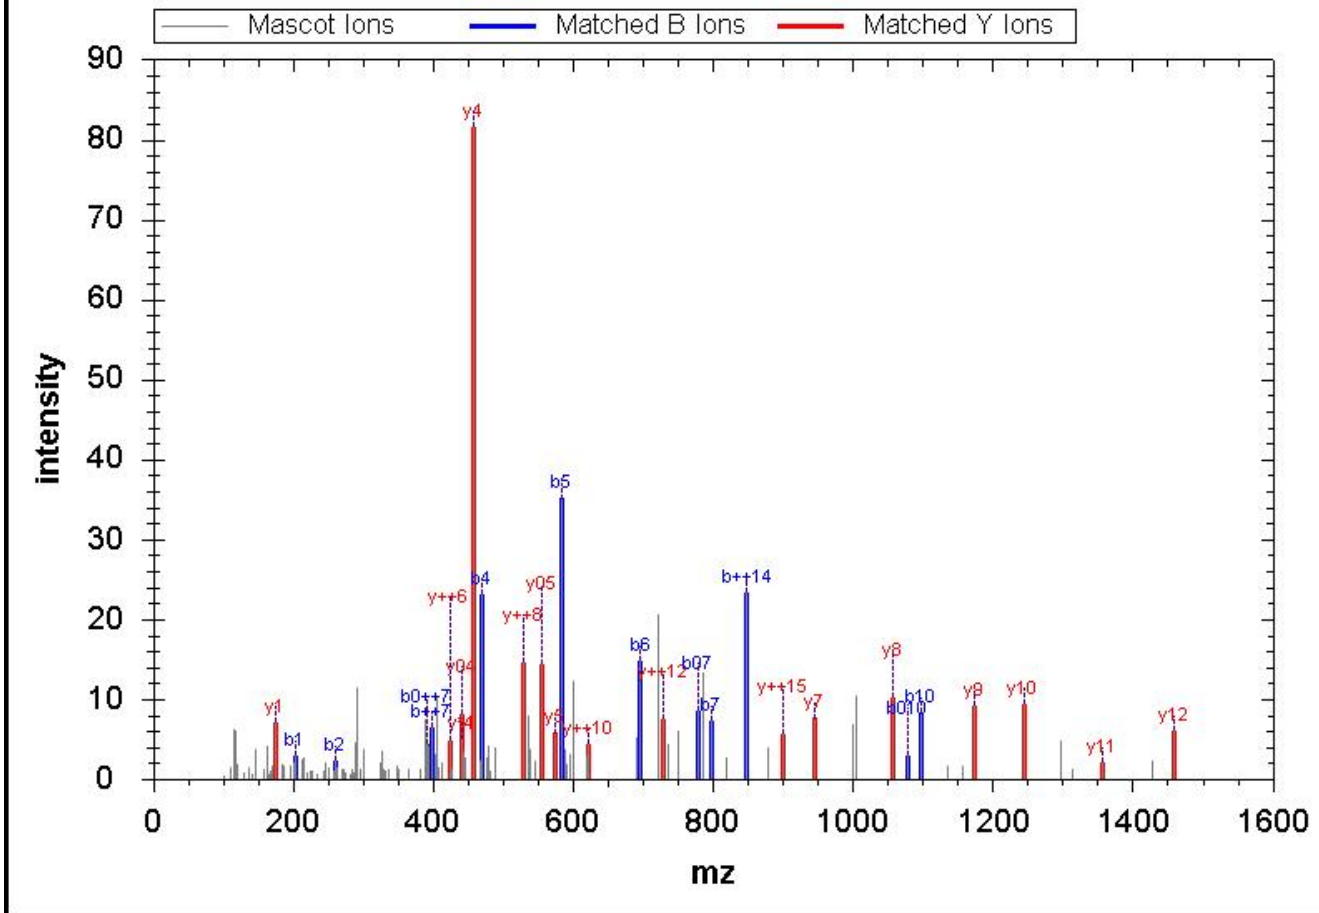

| No | b        | b++    | b*       | b*++   | b0       | b0++   | Seq | y        | y++    | y*       | y*++   | y0       | y0++   | RevNo |
|----|----------|--------|----------|--------|----------|--------|-----|----------|--------|----------|--------|----------|--------|-------|
| 1  | 202.13   | 101.57 |          |        |          |        | G   |          |        |          |        |          |        | 18    |
| 2  | 259.15   | 130.08 |          |        |          |        | G   | 1,952.13 | 976.57 | 1,935.10 | 968.06 | 1,934.12 | 967.56 | 17    |
| 3  | 356.21   | 178.61 |          |        |          |        | P   | 1,895.11 | 948.06 | 1,878.08 | 939.54 | 1,877.10 | 939.05 | 16    |
| 4  | 470.25   | 235.63 | 453.22   | 227.11 |          |        | N   | 1,798.06 | 899.53 | 1,781.03 | 891.02 | 1,780.05 | 890.53 | 15    |
| 5  | 583.33   | 292.17 | 566.31   | 283.66 |          |        | I   | 1,684.01 | 842.51 | 1,666.99 | 834.00 | 1,666.00 | 833.50 | 14    |
| 6  | 696.42   | 348.71 | 679.39   | 340.20 |          |        | I   | 1,570.93 | 785.97 | 1,553.90 | 777.45 | 1,552.92 | 776.96 | 13    |
| 7  | 797.46   | 399.24 | 780.44   | 390.72 | 779.45   | 390.23 | T   | 1,457.84 | 729.43 | 1,440.82 | 720.91 | 1,439.83 | 720.42 | 12    |
| 8  | 910.55   | 455.78 | 893.52   | 447.26 | 892.54   | 446.77 | L   | 1,356.80 | 678.90 | 1,339.77 | 670.39 | 1,338.79 | 669.90 | 11    |
| 9  | 981.58   | 491.30 | 964.56   | 482.78 | 963.57   | 482.29 | A   | 1,243.71 | 622.36 | 1,226.69 | 613.85 | 1,225.70 | 613.35 | 10    |
| 10 | 1,096.61 | 548.81 | 1,079.59 | 540.30 | 1,078.60 | 539.80 | D   | 1,172.68 | 586.84 | 1,155.65 | 578.33 | 1,154.66 | 577.84 | 9     |
| 11 | 1,209.70 | 605.35 | 1,192.67 | 596.84 | 1,191.69 | 596.35 | I   | 1,057.65 | 529.33 | 1,040.62 | 520.81 | 1,039.64 | 520.32 | 8     |
| 12 | 1,308.76 | 654.89 | 1,291.74 | 646.37 | 1,290.75 | 645.88 | V   | 944.56   | 472.79 | 927.54   | 464.27 | 926.55   | 463.78 | 7     |
| 13 | 1,580.96 | 790.98 | 1,563.93 | 782.47 | 1,562.95 | 781.98 | K   | 845.50   | 423.25 | 828.47   | 414.74 | 827.49   | 414.25 | 6     |
| 14 | 1,695.99 | 848.50 | 1,678.96 | 839.98 | 1,677.98 | 839.49 | D   | 573.30   | 287.15 | 556.27   | 278.64 | 555.29   | 278.15 | 5     |
| 15 | 1,793.04 | 897.02 | 1,776.01 | 888.51 | 1,775.03 | 888.02 | P   | 458.27   | 229.64 | 441.25   | 221.13 | 440.26   | 220.63 | 4     |
| 16 | 1,892.11 | 946.56 | 1,875.08 | 938.05 | 1,874.10 | 937.55 | V   | 361.22   | 181.11 | 344.19   | 172.60 | 343.21   | 172.11 | 3     |
| 17 | 1,979.14 | 990.07 | 1,962.11 | 981.56 | 1,961.13 | 981.07 | S   | 262.15   | 131.58 | 245.12   | 123.07 | 244.14   | 122.57 | 2     |
| 18 |          |        |          |        |          |        | R   | 175.12   | 88.06  | 158.09   | 79.55  |          |        | 1     |

Query 2418 Hit 1

MS/MS Fragmentation of **VEENFVILFSDLTMHELK**

Found in **sp|O00267|SPT5H\_HUMAN**, Transcription elongation factor SPT5 OS=Homo sapiens GN=SUPT5H PE=1 SV=1  
Match to Query 2418: 2451.291 from (818.1041, 3+)

Title: 1238: Sum of 2 scans in range 3074 (rt=77.4407, f=4, i=844) to 3075 (rt=77.4661, f=4, i=845)



Data File:

**Monoisotopic mass of neutral peptide Mr(calc): 2451.291**

**Variable modifications:**

**K18 iTRAQ4plex (K)**

**Ions Score: 50.46 Expect: 0.008**

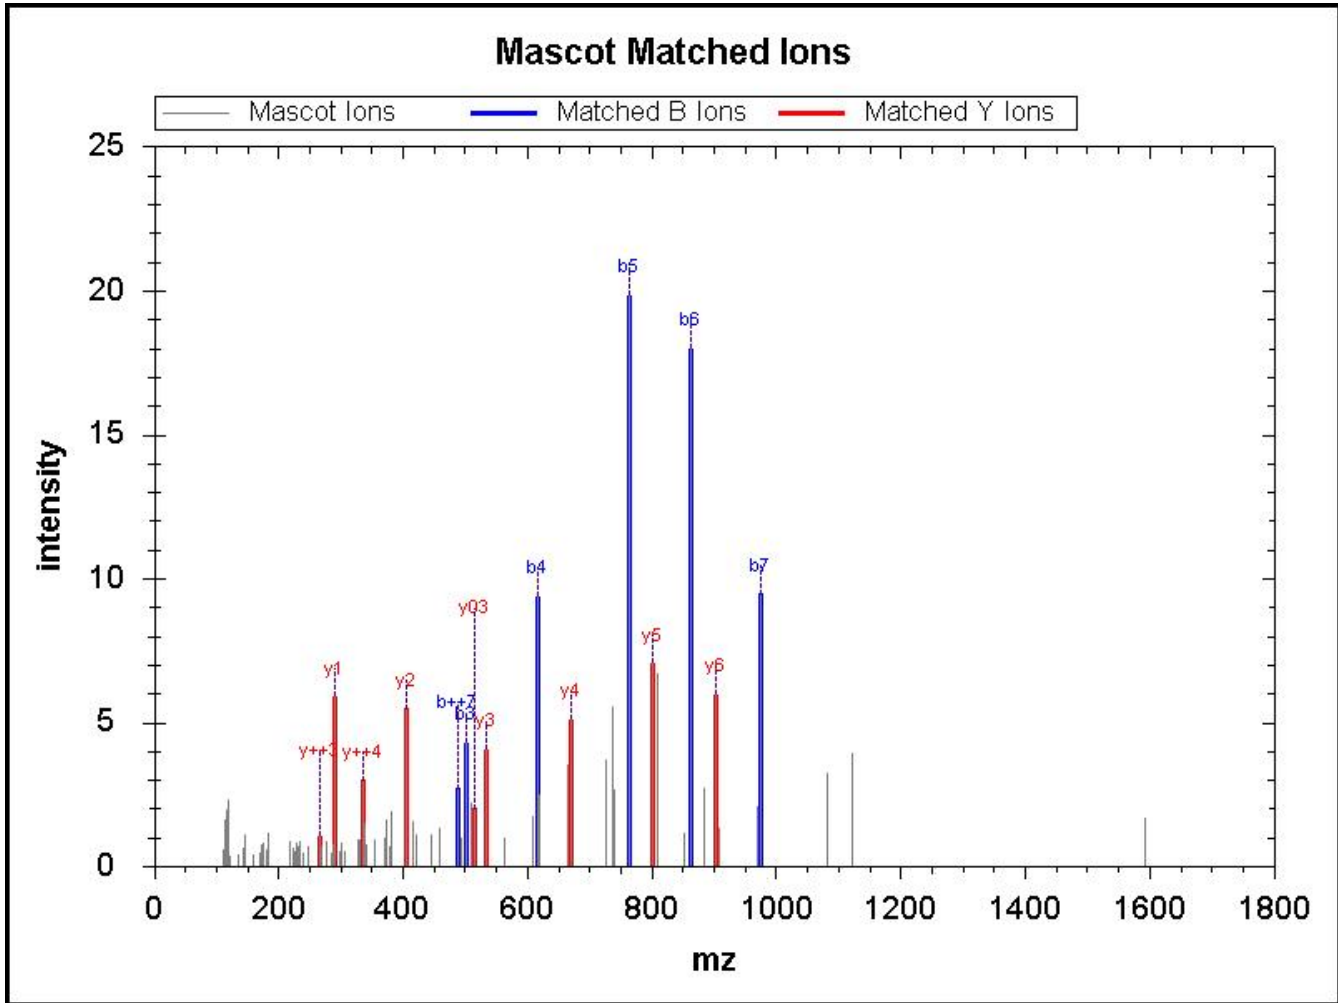

| No | b             | b++           | b*       | b***     | b0       | b0++     | Seq | y             | y++           | y*       | y***     | y0            | y0++     | RevNo |
|----|---------------|---------------|----------|----------|----------|----------|-----|---------------|---------------|----------|----------|---------------|----------|-------|
| 1  | 244.18        | 122.59        |          |          |          |          | V   |               |               |          |          |               |          | 18    |
| 2  | 373.22        | 187.11        |          |          | 355.21   | 178.11   | E   | 2,209.13      | 1,105.07      | 2,192.11 | 1,096.56 | 2,191.12      | 1,096.06 | 17    |
| 3  | <b>502.26</b> | 251.64        |          |          | 484.25   | 242.63   | E   | 2,080.09      | 1,040.55      | 2,063.06 | 1,032.04 | 2,062.08      | 1,031.54 | 16    |
| 4  | <b>616.31</b> | 308.66        | 599.28   | 300.14   | 598.30   | 299.65   | N   | 1,951.05      | 976.03        | 1,934.02 | 967.51   | 1,933.04      | 967.02   | 15    |
| 5  | <b>763.37</b> | 382.19        | 746.35   | 373.68   | 745.36   | 373.19   | F   | 1,837.00      | 919.01        | 1,819.98 | 910.49   | 1,818.99      | 910.00   | 14    |
| 6  | <b>862.44</b> | 431.72        | 845.42   | 423.21   | 844.43   | 422.72   | V   | 1,689.94      | 845.47        | 1,672.91 | 836.96   | 1,671.93      | 836.47   | 13    |
| 7  | <b>975.53</b> | <b>488.27</b> | 958.50   | 479.75   | 957.52   | 479.26   | I   | 1,590.87      | 795.94        | 1,573.84 | 787.42   | 1,572.86      | 786.93   | 12    |
| 8  | 1,088.61      | 544.81        | 1,071.58 | 536.30   | 1,070.60 | 535.80   | L   | 1,477.78      | 739.40        | 1,460.76 | 730.88   | 1,459.77      | 730.39   | 11    |
| 9  | 1,235.68      | 618.34        | 1,218.65 | 609.83   | 1,217.67 | 609.34   | F   | 1,364.70      | 682.85        | 1,347.67 | 674.34   | 1,346.69      | 673.85   | 10    |
| 10 | 1,322.71      | 661.86        | 1,305.68 | 653.35   | 1,304.70 | 652.85   | S   | 1,217.63      | 609.32        | 1,200.60 | 600.81   | 1,199.62      | 600.31   | 9     |
| 11 | 1,437.74      | 719.37        | 1,420.71 | 710.86   | 1,419.73 | 710.37   | D   | 1,130.60      | 565.80        | 1,113.57 | 557.29   | 1,112.59      | 556.80   | 8     |
| 12 | 1,550.82      | 775.91        | 1,533.80 | 767.40   | 1,532.81 | 766.91   | L   | 1,015.57      | 508.29        | 998.55   | 499.78   | 997.56        | 499.28   | 7     |
| 13 | 1,651.87      | 826.44        | 1,634.84 | 817.93   | 1,633.86 | 817.43   | T   | <b>902.49</b> | 451.75        | 885.46   | 443.23   | 884.48        | 442.74   | 6     |
| 14 | 1,782.91      | 891.96        | 1,765.88 | 883.45   | 1,764.90 | 882.95   | M   | <b>801.44</b> | 401.22        | 784.41   | 392.71   | 783.43        | 392.22   | 5     |
| 15 | 1,919.97      | 960.49        | 1,902.94 | 951.98   | 1,901.96 | 951.48   | H   | <b>670.40</b> | <b>335.70</b> | 653.37   | 327.19   | 652.39        | 326.70   | 4     |
| 16 | 2,049.01      | 1,025.01      | 2,031.99 | 1,016.50 | 2,031.00 | 1,016.00 | E   | <b>533.34</b> | <b>267.17</b> | 516.31   | 258.66   | <b>515.33</b> | 258.17   | 3     |
| 17 | 2,162.10      | 1,081.55      | 2,145.07 | 1,073.04 | 2,144.09 | 1,072.55 | L   | <b>404.30</b> | 202.65        | 387.27   | 194.14   |               |          | 2     |
| 18 |               |               |          |          |          |          | K   | <b>291.21</b> | 146.11        | 274.19   | 137.60   |               |          | 1     |

Query 555 Hit 1

MS/MS Fragmentation of **YLNFFTK**

Found in **sp|P12004|PCNA\_HUMAN**, Proliferating cell nuclear antigen OS=Homo sapiens GN=PCNA PE=1 SV=1

Match to Query 555: 1219.684 from (610.8495, 2+)

Title: 746: Sum of 2 scans in range 2038 (rt=54.0983, f=4, i=510) to 2039 (rt=54.1237, f=4, i=511)

[D:\lab212\membrane\Grace\20120214\_iTRAQ\_1.raw]

Data File:

**Monoisotopic mass of neutral peptide Mr(calc): 1219.684**

**Variable modifications:**

**K7** iTRAQ4plex (K)

**Ions Score: 51.16 Expect: 0.006**

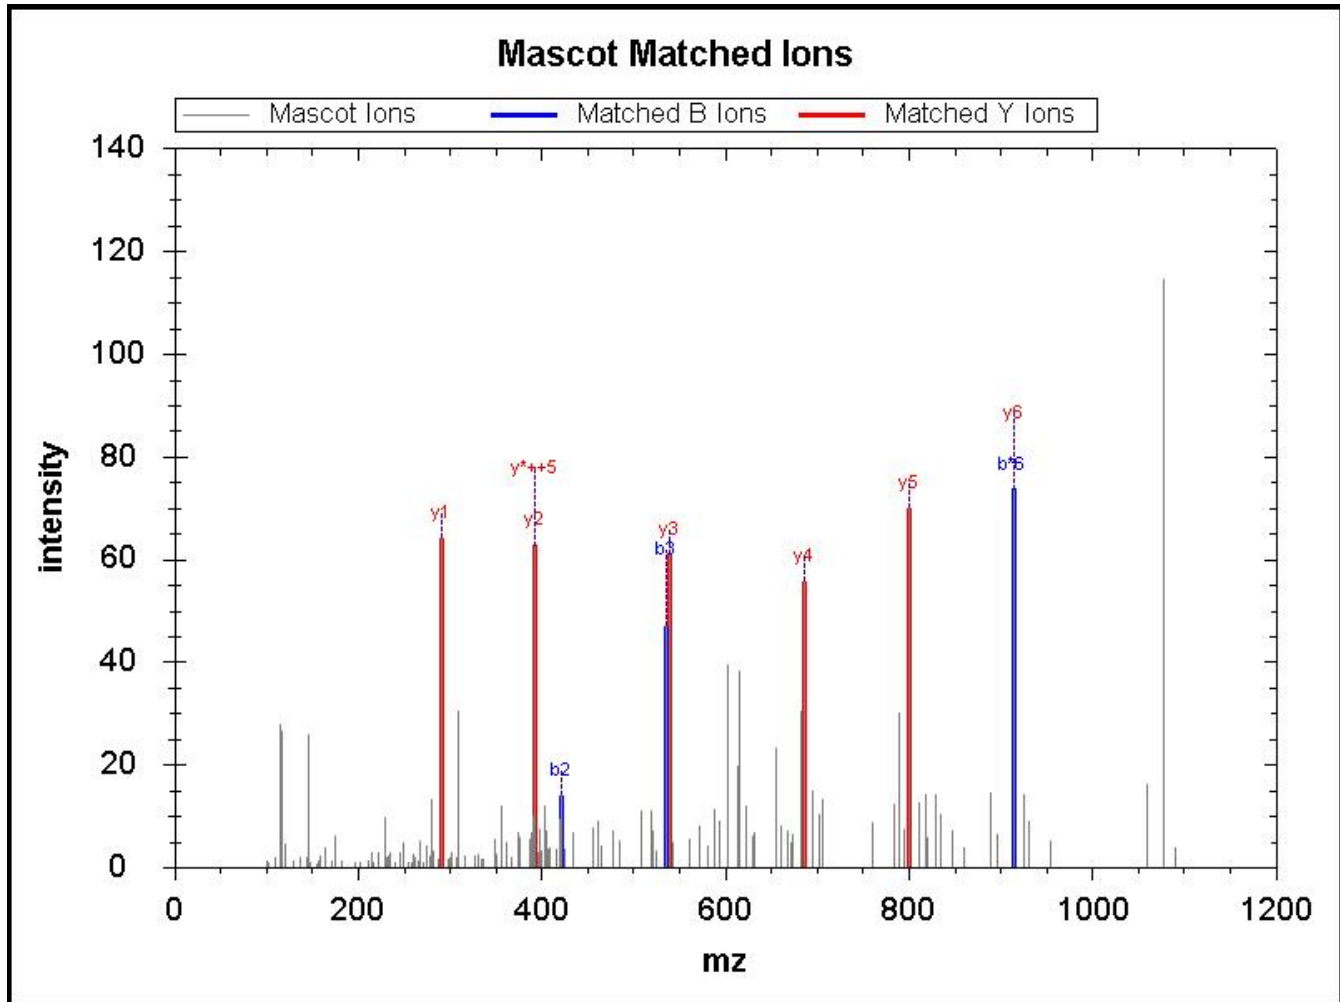

| No | b             | b++    | b*            | b**    | b0     | b0++   | Seq | y             | y++    | y*     | y**           | y0     | y0++   | RevNo |
|----|---------------|--------|---------------|--------|--------|--------|-----|---------------|--------|--------|---------------|--------|--------|-------|
| 1  | 308.17        | 154.59 |               |        |        |        | Y   |               |        |        |               |        |        | 7     |
| 2  | <b>421.26</b> | 211.13 |               |        |        |        | L   | <b>913.53</b> | 457.27 | 896.50 | 448.75        | 895.52 | 448.26 | 6     |
| 3  | <b>535.30</b> | 268.15 | 518.27        | 259.64 |        |        | N   | <b>800.44</b> | 400.72 | 783.42 | <b>392.21</b> | 782.43 | 391.72 | 5     |
| 4  | 682.37        | 341.69 | 665.34        | 333.17 |        |        | F   | <b>686.40</b> | 343.70 | 669.37 | 335.19        | 668.39 | 334.70 | 4     |
| 5  | 829.44        | 415.22 | 812.41        | 406.71 |        |        | F   | <b>539.33</b> | 270.17 | 522.30 | 261.66        | 521.32 | 261.16 | 3     |
| 6  | 930.48        | 465.75 | <b>913.46</b> | 457.23 | 912.47 | 456.74 | T   | <b>392.26</b> | 196.63 | 375.24 | 188.12        | 374.25 | 187.63 | 2     |
| 7  |               |        |               |        |        |        | K   | <b>291.21</b> | 146.11 | 274.19 | 137.60        |        |        | 1     |

Query 2606 Hit 1

MS/MS Fragmentation of **LLTAPELILDQWFQLSSSGPNSR**

Found in **sp|Q9BSJ8|ESYT1\_HUMAN**, Extended synaptotagmin-1 OS=Homo sapiens GN=ESYT1 PE=1 SV=1

Match to Query 2606: 2715.431 from (906.1509, 3+)

Title: 1404: Sum of 2 scans in range 3404 (rt=84.9428, f=4, i=937) to 3405 (rt=84.9682, f=4, i=938)

[D:\lab212\membrane\Grace\20120214\_iTRAQ\_2.raw]

Data File:

Monoisotopic mass of neutral peptide Mr(calc): 2715.431

Variable modifications:

Ions Score: 52.53 Expect: 0.004

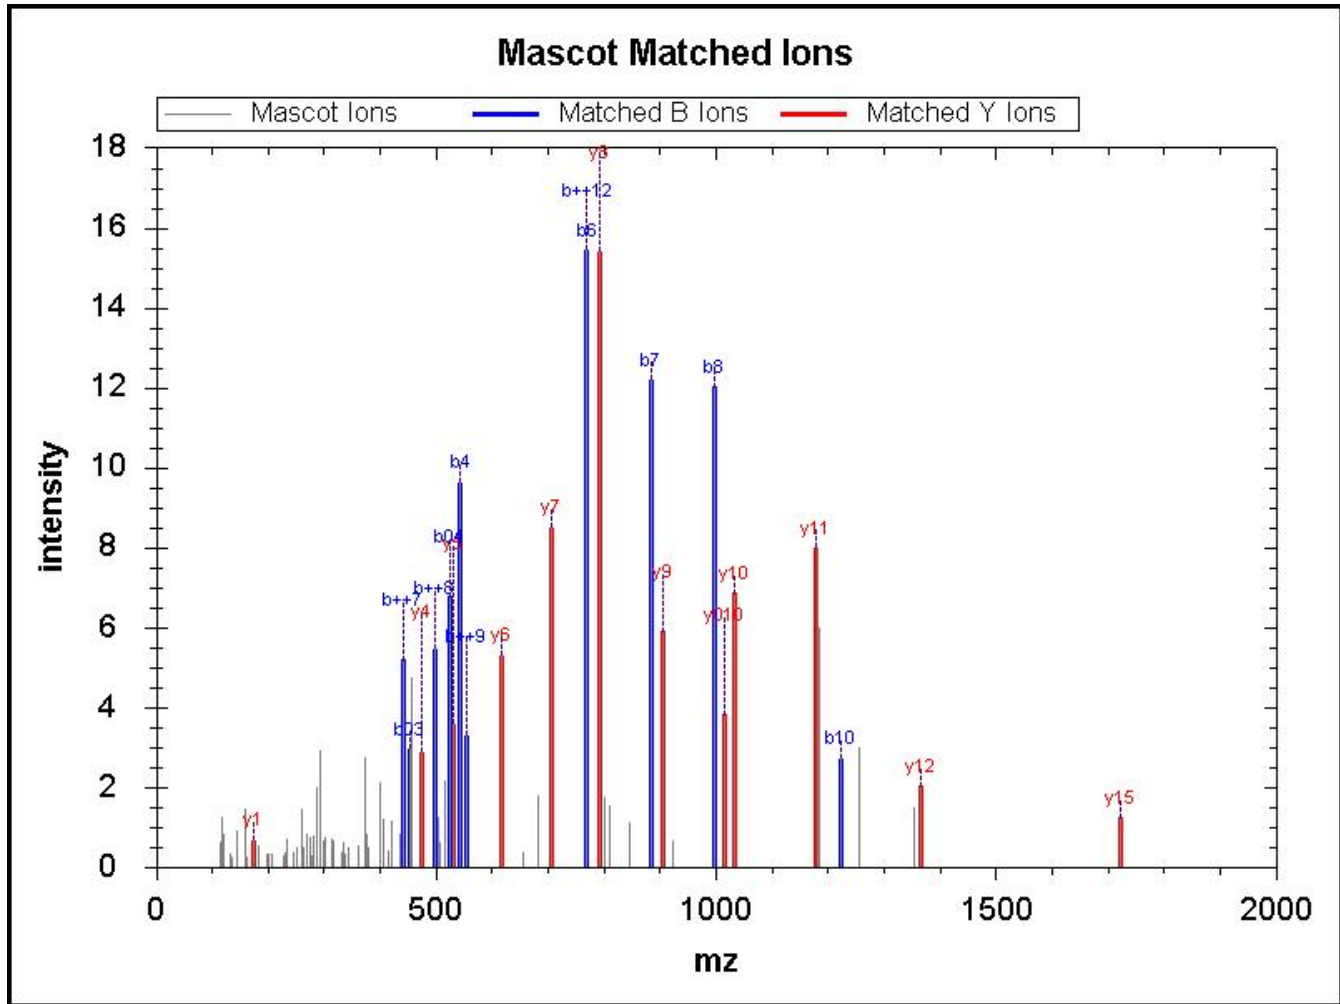

| No | b        | b++      | b*       | b*++     | b0       | b0++     | Seq | y        | y++      | y*       | y*++     | y0       | y0++     | RevNo |
|----|----------|----------|----------|----------|----------|----------|-----|----------|----------|----------|----------|----------|----------|-------|
| 1  | 258.19   | 129.60   |          |          |          |          | L   |          |          |          |          |          |          | 23    |
| 2  | 371.28   | 186.14   |          |          |          |          | L   | 2,459.26 | 1,230.13 | 2,442.23 | 1,221.62 | 2,441.25 | 1,221.13 | 22    |
| 3  | 472.33   | 236.67   |          |          | 454.31   | 227.66   | T   | 2,346.17 | 1,173.59 | 2,329.15 | 1,165.08 | 2,328.16 | 1,164.58 | 21    |
| 4  | 543.36   | 272.18   |          |          | 525.35   | 263.18   | A   | 2,245.12 | 1,123.07 | 2,228.10 | 1,114.55 | 2,227.11 | 1,114.06 | 20    |
| 5  | 640.41   | 320.71   |          |          | 622.40   | 311.71   | P   | 2,174.09 | 1,087.55 | 2,157.06 | 1,079.03 | 2,156.08 | 1,078.54 | 19    |
| 6  | 769.46   | 385.23   |          |          | 751.45   | 376.23   | E   | 2,077.03 | 1,039.02 | 2,060.01 | 1,030.51 | 2,059.02 | 1,030.02 | 18    |
| 7  | 882.54   | 441.77   |          |          | 864.53   | 432.77   | L   | 1,947.99 | 974.50   | 1,930.97 | 965.99   | 1,929.98 | 965.49   | 17    |
| 8  | 995.63   | 498.32   |          |          | 977.62   | 489.31   | I   | 1,834.91 | 917.96   | 1,817.88 | 909.44   | 1,816.90 | 908.95   | 16    |
| 9  | 1,108.71 | 554.86   |          |          | 1,090.70 | 545.85   | L   | 1,721.82 | 861.42   | 1,704.80 | 852.90   | 1,703.81 | 852.41   | 15    |
| 10 | 1,223.74 | 612.37   |          |          | 1,205.73 | 603.37   | D   | 1,608.74 | 804.87   | 1,591.71 | 796.36   | 1,590.73 | 795.87   | 14    |
| 11 | 1,351.80 | 676.40   | 1,334.77 | 667.89   | 1,333.78 | 667.40   | Q   | 1,493.71 | 747.36   | 1,476.69 | 738.85   | 1,475.70 | 738.35   | 13    |
| 12 | 1,537.87 | 769.44   | 1,520.85 | 760.93   | 1,519.86 | 760.44   | W   | 1,365.65 | 683.33   | 1,348.63 | 674.82   | 1,347.64 | 674.33   | 12    |
| 13 | 1,684.94 | 842.98   | 1,667.92 | 834.46   | 1,666.93 | 833.97   | F   | 1,179.58 | 590.29   | 1,162.55 | 581.78   | 1,161.56 | 581.29   | 11    |
| 14 | 1,813.00 | 907.00   | 1,795.98 | 898.49   | 1,794.99 | 898.00   | Q   | 1,032.51 | 516.76   | 1,015.48 | 508.24   | 1,014.50 | 507.75   | 10    |
| 15 | 1,926.09 | 963.55   | 1,909.06 | 955.03   | 1,908.08 | 954.54   | L   | 904.45   | 452.73   | 887.42   | 444.21   | 886.44   | 443.72   | 9     |
| 16 | 2,013.12 | 1,007.06 | 1,996.09 | 998.55   | 1,995.11 | 998.06   | S   | 791.36   | 396.19   | 774.34   | 387.67   | 773.35   | 387.18   | 8     |
| 17 | 2,100.15 | 1,050.58 | 2,083.12 | 1,042.07 | 2,082.14 | 1,041.57 | S   | 704.33   | 352.67   | 687.31   | 344.16   | 686.32   | 343.66   | 7     |
| 18 | 2,187.18 | 1,094.09 | 2,170.16 | 1,085.58 | 2,169.17 | 1,085.09 | S   | 617.30   | 309.15   | 600.27   | 300.64   | 599.29   | 300.15   | 6     |
| 19 | 2,244.20 | 1,122.61 | 2,227.18 | 1,114.09 | 2,226.19 | 1,113.60 | G   | 530.27   | 265.64   | 513.24   | 257.12   | 512.26   | 256.63   | 5     |
| 20 | 2,341.26 | 1,171.13 | 2,324.23 | 1,162.62 | 2,323.25 | 1,162.13 | P   | 473.25   | 237.13   | 456.22   | 228.61   | 455.24   | 228.12   | 4     |

|    |          |          |          |          |          |          |   |        |        |        |        |        |        |   |
|----|----------|----------|----------|----------|----------|----------|---|--------|--------|--------|--------|--------|--------|---|
| 21 | 2,455.30 | 1,228.15 | 2,438.27 | 1,219.64 | 2,437.29 | 1,219.15 | N | 376.19 | 188.60 | 359.17 | 180.09 | 358.18 | 179.60 | 3 |
| 22 | 2,542.33 | 1,271.67 | 2,525.30 | 1,263.16 | 2,524.32 | 1,262.66 | S | 262.15 | 131.58 | 245.12 | 123.07 | 244.14 | 122.57 | 2 |
| 23 |          |          |          |          |          |          | R | 175.12 | 88.06  | 158.09 | 79.55  |        |        | 1 |

Query 1732 Hit 1

MS/MS Fragmentation of **GLGTDEDTHDIHTR**

Found in **sp|P08133|ANXA6\_HUMAN**, Annexin A6 OS=Homo sapiens GN=ANXA6 PE=1 SV=3

Match to Query 1732: 1911.998from(638.34,3+)

Title: 933: Scan 2384 (rt=61.9767, f=3, i=339) [D:\lab212\membrane\Grace\20120214\_iTRAQ\_2.raw]

Data File:

**Monoisotopic mass of neutral peptide Mr(calc): 1911.998**

**Variable modifications:**

**Ions Score: 54.24 Expect: 0.003**

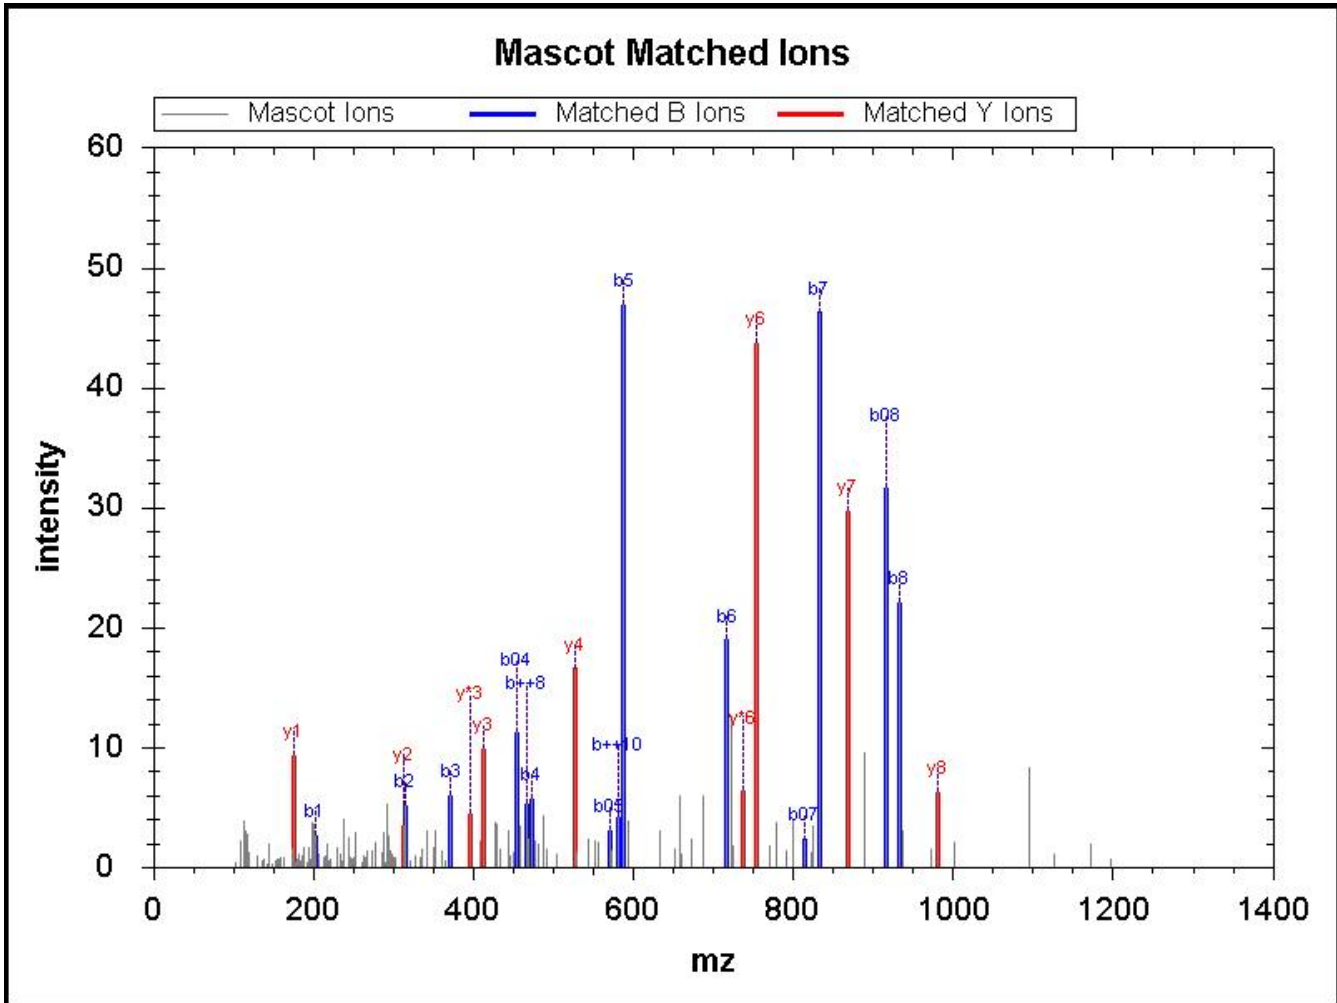

| No | b        | b++    | b0       | b0++   | Seq | y        | y++    | y*       | y*++   | y0       | y0++   | RevNo |
|----|----------|--------|----------|--------|-----|----------|--------|----------|--------|----------|--------|-------|
| 1  | 202.13   | 101.57 |          |        | G   |          |        |          |        |          |        | 16    |
| 2  | 315.21   | 158.11 |          |        | L   | 1,711.89 | 856.45 | 1,694.86 | 847.93 | 1,693.88 | 847.44 | 15    |
| 3  | 372.24   | 186.62 |          |        | G   | 1,598.80 | 799.90 | 1,581.78 | 791.39 | 1,580.79 | 790.90 | 14    |
| 4  | 473.28   | 237.15 | 455.27   | 228.14 | T   | 1,541.78 | 771.39 | 1,524.75 | 762.88 | 1,523.77 | 762.39 | 13    |
| 5  | 588.31   | 294.66 | 570.30   | 285.65 | D   | 1,440.73 | 720.87 | 1,423.71 | 712.36 | 1,422.72 | 711.86 | 12    |
| 6  | 717.35   | 359.18 | 699.34   | 350.18 | E   | 1,325.71 | 663.36 | 1,308.68 | 654.84 | 1,307.70 | 654.35 | 11    |
| 7  | 832.38   | 416.69 | 814.37   | 407.69 | D   | 1,196.66 | 598.84 | 1,179.64 | 590.32 | 1,178.65 | 589.83 | 10    |
| 8  | 933.43   | 467.22 | 915.42   | 458.21 | T   | 1,081.64 | 541.32 | 1,064.61 | 532.81 | 1,063.63 | 532.32 | 9     |
| 9  | 1,046.51 | 523.76 | 1,028.50 | 514.75 | I   | 980.59   | 490.80 | 963.56   | 482.28 | 962.58   | 481.79 | 8     |
| 10 | 1,159.60 | 580.30 | 1,141.59 | 571.30 | I   | 867.50   | 434.26 | 850.48   | 425.74 | 849.49   | 425.25 | 7     |
| 11 | 1,274.62 | 637.82 | 1,256.61 | 628.81 | D   | 754.42   | 377.71 | 737.39   | 369.20 | 736.41   | 368.71 | 6     |
| 12 | 1,387.71 | 694.36 | 1,369.70 | 685.35 | I   | 639.39   | 320.20 | 622.37   | 311.69 | 621.38   | 311.20 | 5     |

|    |          |        |          |        |   |        |        |        |        |        |        |   |
|----|----------|--------|----------|--------|---|--------|--------|--------|--------|--------|--------|---|
| 13 | 1,500.79 | 750.90 | 1,482.78 | 741.89 | I | 526.31 | 263.66 | 509.28 | 255.15 | 508.30 | 254.65 | 4 |
| 14 | 1,601.84 | 801.42 | 1,583.83 | 792.42 | T | 413.23 | 207.12 | 396.20 | 198.60 | 395.21 | 198.11 | 3 |
| 15 | 1,738.90 | 869.95 | 1,720.89 | 860.95 | H | 312.18 | 156.59 | 295.15 | 148.08 |        |        | 2 |
| 16 |          |        |          |        | R | 175.12 | 88.06  | 158.09 | 79.55  |        |        | 1 |

Query 2571 Hit 1

MS/MS Fragmentation of **VAMQDATAQMAMLQFISSGLSK**

Found in **sp|Q99798|ACON\_HUMAN**, Aconitate hydratase

Match to Query 2571: 2615.333 from (872.7852, 3+)

Title: 1130: Sum of 2 scans in range 2795 (rt=71.2381, f=4, i=751) to 2796 (rt=71.2635, f=4, i=752)

[D:\lab212\membrane\Grace\20120214\_iTRAQ\_2.raw]

Data File:

**Monoisotopic mass of neutral peptide Mr(calc): 2615.333**

**Variable modifications:**

**K22** iTRAQ4plex (K)

**Ions Score: 54.33 Expect: 0.003**

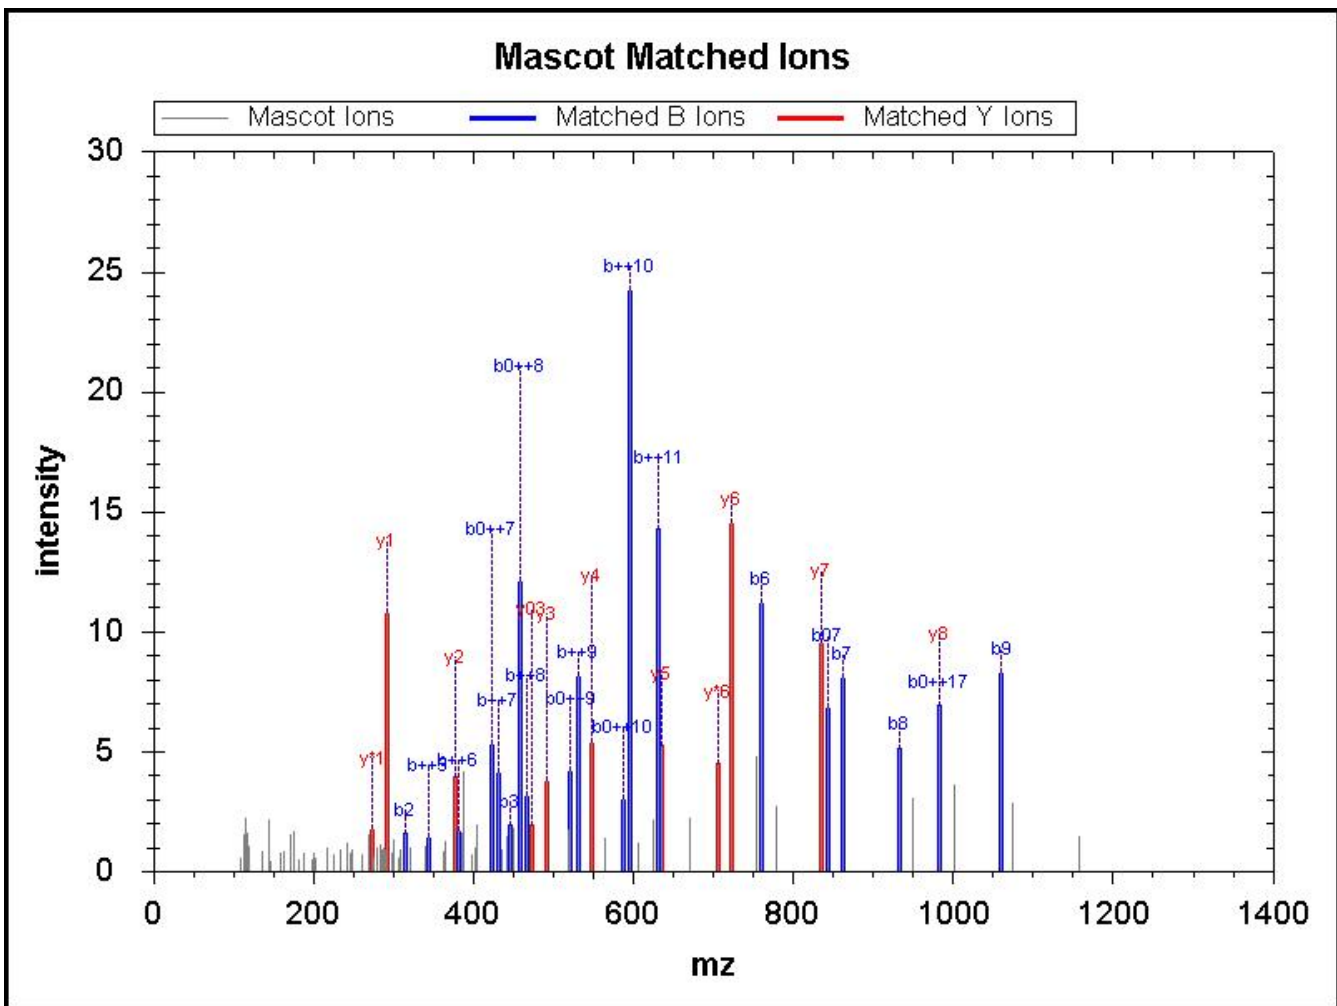

|    |          |          |          |          |          |          |   |          |        |          |        |          |        |    |
|----|----------|----------|----------|----------|----------|----------|---|----------|--------|----------|--------|----------|--------|----|
| 10 | 1,191.56 | 596.28   | 1,174.54 | 587.77   | 1,173.55 | 587.28   | M | 1,556.83 | 778.92 | 1,539.80 | 770.41 | 1,538.82 | 769.91 | 13 |
| 11 | 1,262.60 | 631.80   | 1,245.57 | 623.29   | 1,244.59 | 622.80   | A | 1,425.79 | 713.40 | 1,408.76 | 704.89 | 1,407.78 | 704.39 | 12 |
| 12 | 1,393.64 | 697.32   | 1,376.61 | 688.81   | 1,375.63 | 688.32   | M | 1,354.75 | 677.88 | 1,337.73 | 669.37 | 1,336.74 | 668.87 | 11 |
| 13 | 1,506.72 | 753.87   | 1,489.70 | 745.35   | 1,488.71 | 744.86   | L | 1,223.71 | 612.36 | 1,206.69 | 603.85 | 1,205.70 | 603.35 | 10 |
| 14 | 1,634.78 | 817.89   | 1,617.76 | 809.38   | 1,616.77 | 808.89   | Q | 1,110.63 | 555.82 | 1,093.60 | 547.30 | 1,092.62 | 546.81 | 9  |
| 15 | 1,781.85 | 891.43   | 1,764.82 | 882.92   | 1,763.84 | 882.42   | F | 982.57   | 491.79 | 965.54   | 483.27 | 964.56   | 482.78 | 8  |
| 16 | 1,894.93 | 947.97   | 1,877.91 | 939.46   | 1,876.92 | 938.97   | I | 835.50   | 418.25 | 818.47   | 409.74 | 817.49   | 409.25 | 7  |
| 17 | 1,981.97 | 991.49   | 1,964.94 | 982.97   | 1,963.96 | 982.48   | S | 722.42   | 361.71 | 705.39   | 353.20 | 704.41   | 352.71 | 6  |
| 18 | 2,069.00 | 1,035.00 | 2,051.97 | 1,026.49 | 2,050.99 | 1,026.00 | S | 635.38   | 318.20 | 618.36   | 309.68 | 617.37   | 309.19 | 5  |
| 19 | 2,126.02 | 1,063.51 | 2,108.99 | 1,055.00 | 2,108.01 | 1,054.51 | G | 548.35   | 274.68 | 531.33   | 266.17 | 530.34   | 265.67 | 4  |
| 20 | 2,239.10 | 1,120.06 | 2,222.08 | 1,111.54 | 2,221.09 | 1,111.05 | L | 491.33   | 246.17 | 474.30   | 237.66 | 473.32   | 237.16 | 3  |
| 21 | 2,326.14 | 1,163.57 | 2,309.11 | 1,155.06 | 2,308.13 | 1,154.57 | S | 378.25   | 189.63 | 361.22   | 181.11 | 360.24   | 180.62 | 2  |
| 22 |          |          |          |          |          |          | K | 291.21   | 146.11 | 274.19   | 137.60 |          |        | 1  |

Query 545 Hit 1

MS/MS Fragmentation of **GALKKVLAK**

Found in **sp|Q8NGZ5|OR2G2\_HUMAN**, Olfactory receptor 2G2 OS=Homo sapiens GN=OR2G2 PE=2 SV=1

Match to Query 545: 1214.76from(608.3871,2+)

Title: 333: Scan 1176 (rt=34.6697, f=3, i=131) [D:\lab212\membrane\Grace\20120214\_iTRAQ\_1.raw]

Data File:

**Monoisotopic mass of neutral peptide Mr(calc):** 1214.76

**Variable modifications:**

**K9** iTRAQ4plex (K)

**Ions Score:** 56.14 **Expect:** 0.001

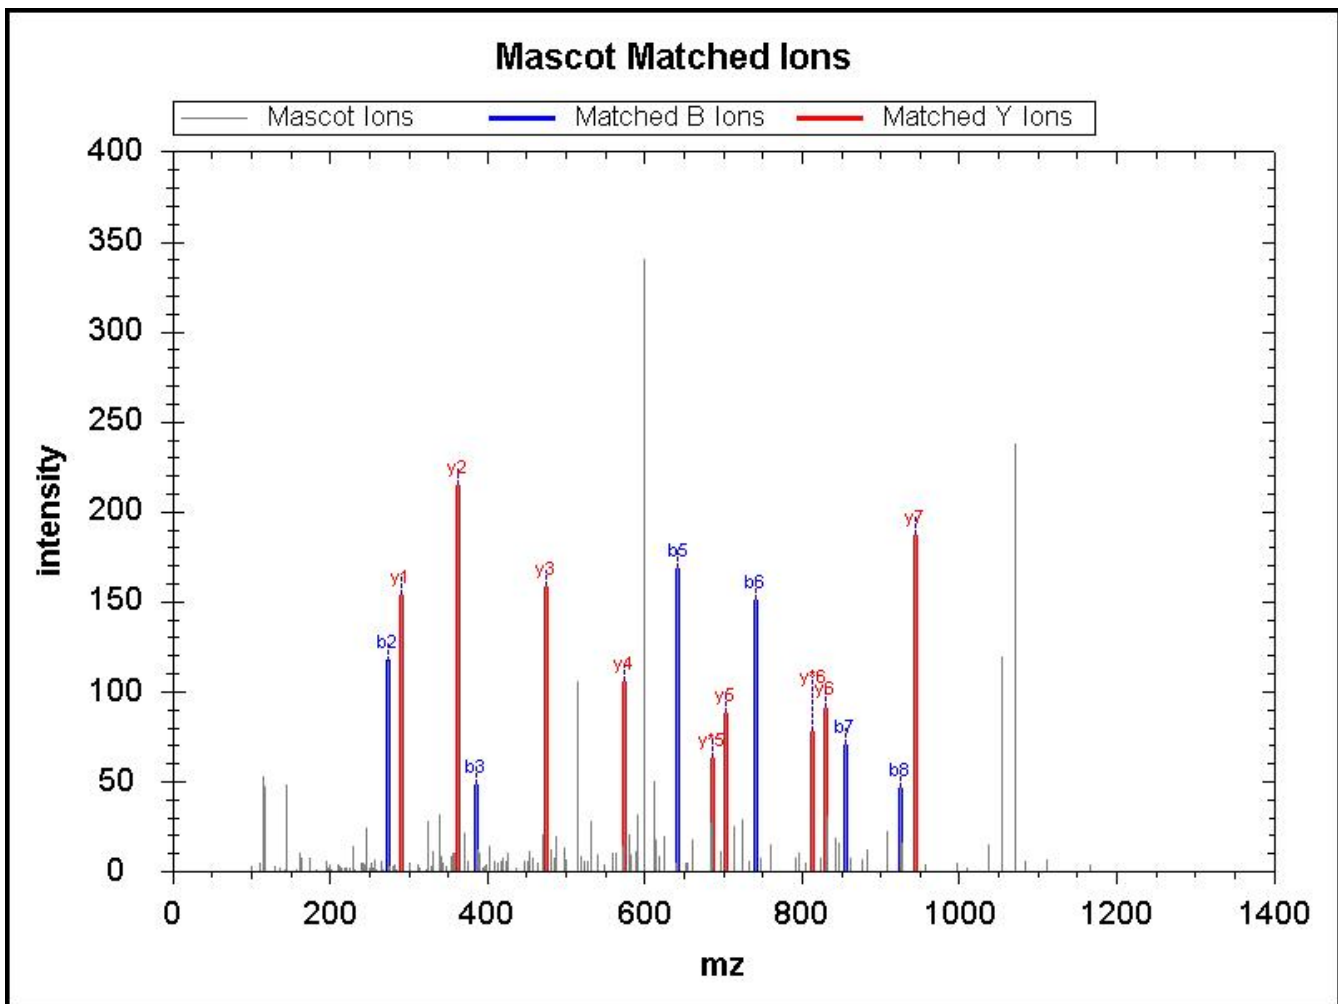

| No | b      | b++    | b* | b*++ | Seq      | y | y++ | y* | y*++ | RevNo    |
|----|--------|--------|----|------|----------|---|-----|----|------|----------|
| 1  | 202.13 | 101.57 |    |      | <b>G</b> |   |     |    |      | <b>9</b> |

|   |               |        |        |        |   |               |        |               |        |   |
|---|---------------|--------|--------|--------|---|---------------|--------|---------------|--------|---|
| 2 | <b>273.17</b> | 137.09 |        |        | A | 1,014.72      | 507.86 | 997.69        | 499.35 | 8 |
| 3 | <b>386.25</b> | 193.63 |        |        | L | <b>943.68</b> | 472.34 | 926.65        | 463.83 | 7 |
| 4 | 514.35        | 257.68 | 497.32 | 249.16 | K | <b>830.59</b> | 415.80 | <b>813.57</b> | 407.29 | 6 |
| 5 | <b>642.44</b> | 321.72 | 625.42 | 313.21 | K | <b>702.50</b> | 351.75 | <b>685.47</b> | 343.24 | 5 |
| 6 | <b>741.51</b> | 371.26 | 724.48 | 362.75 | V | <b>574.40</b> | 287.71 | 557.38        | 279.19 | 4 |
| 7 | <b>854.59</b> | 427.80 | 837.57 | 419.29 | L | <b>475.34</b> | 238.17 | 458.31        | 229.66 | 3 |
| 8 | <b>925.63</b> | 463.32 | 908.60 | 454.81 | A | <b>362.25</b> | 181.63 | 345.23        | 173.12 | 2 |
| 9 |               |        |        |        | K | <b>291.21</b> | 146.11 | 274.19        | 137.60 | 1 |

Query 2215 Hit 1

MS/MS Fragmentation of **QQDAQEFFLHLINMVER**

Found in **sp|P45974|UBP5\_HUMAN**, Ubiquitin carboxyl-terminal hydrolase 5 OS=Homo sapiens GN=USP5 PE=1 SV=2

Match to Query 2215: 2261.142from(754.7213,3+)

Title: 1211: Scan 2973 (rt=75.2483, f=3, i=434) [D:\lab212\membrane\Grace\20120214\_iTRAQ\_2.raw]

Data File:

**Monoisotopic mass of neutral peptide Mr(calc): 2261.142**

**Variable modifications:**

**Ions Score: 56.33 Expect: 0.002**

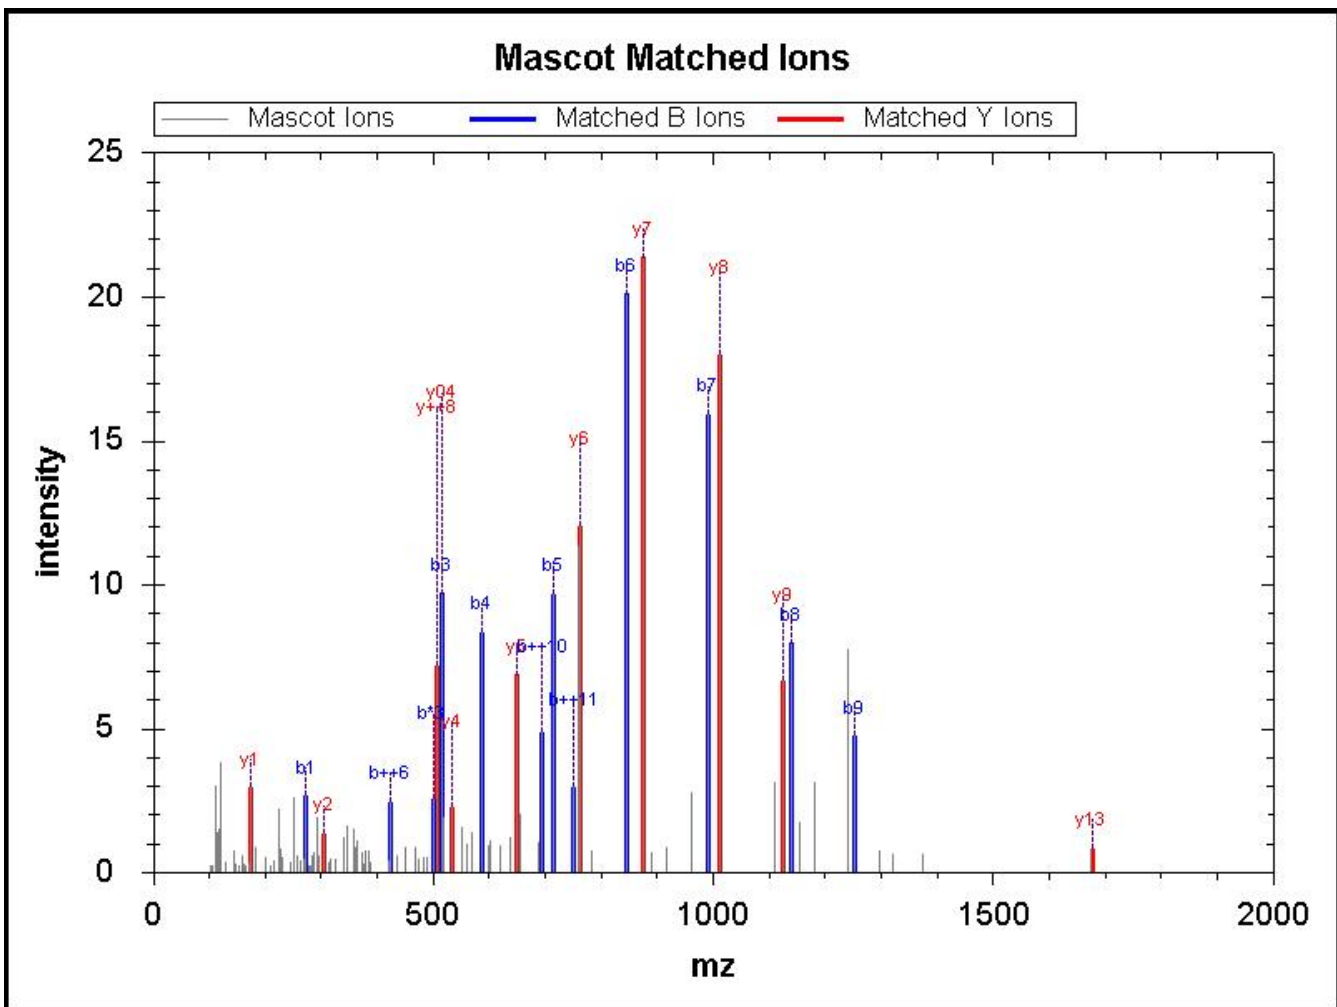

| No | b             | b++           | b*            | b*++   | b0     | b0++   | Seq | y               | y++    | y*       | y*++   | y0       | y0++   | RevNo |
|----|---------------|---------------|---------------|--------|--------|--------|-----|-----------------|--------|----------|--------|----------|--------|-------|
| 1  | <b>273.17</b> | 137.09        | 256.14        | 128.57 |        |        | Q   |                 |        |          |        |          |        | 17    |
| 2  | 401.23        | 201.12        | 384.20        | 192.60 |        |        | Q   | 1,989.99        | 995.50 | 1,972.96 | 986.98 | 1,971.97 | 986.49 | 16    |
| 3  | <b>516.25</b> | 258.63        | <b>499.23</b> | 250.12 | 498.24 | 249.63 | D   | 1,861.93        | 931.47 | 1,844.90 | 922.95 | 1,843.92 | 922.46 | 15    |
| 4  | <b>587.29</b> | 294.15        | 570.26        | 285.64 | 569.28 | 285.14 | A   | 1,746.90        | 873.95 | 1,729.87 | 865.44 | 1,728.89 | 864.95 | 14    |
| 5  | <b>715.35</b> | 358.18        | 698.32        | 349.66 | 697.34 | 349.17 | Q   | <b>1,675.86</b> | 838.43 | 1,658.84 | 829.92 | 1,657.85 | 829.43 | 13    |
| 6  | <b>844.39</b> | <b>422.70</b> | 827.37        | 414.19 | 826.38 | 413.69 | E   | 1,547.80        | 774.41 | 1,530.78 | 765.89 | 1,529.79 | 765.40 | 12    |
| 7  | <b>991.46</b> | 496.23        | 974.43        | 487.72 | 973.45 | 487.23 | F   | 1,418.76        | 709.88 | 1,401.73 | 701.37 | 1,400.75 | 700.88 | 11    |

|    |          |          |          |          |          |          |   |          |        |          |        |          |        |    |
|----|----------|----------|----------|----------|----------|----------|---|----------|--------|----------|--------|----------|--------|----|
| 8  | 1,138.53 | 569.77   | 1,121.50 | 561.25   | 1,120.52 | 560.76   | F | 1,271.69 | 636.35 | 1,254.67 | 627.84 | 1,253.68 | 627.34 | 10 |
| 9  | 1,251.61 | 626.31   | 1,234.59 | 617.80   | 1,233.60 | 617.30   | L | 1,124.62 | 562.82 | 1,107.60 | 554.30 | 1,106.61 | 553.81 | 9  |
| 10 | 1,388.67 | 694.84   | 1,371.65 | 686.33   | 1,370.66 | 685.83   | H | 1,011.54 | 506.27 | 994.51   | 497.76 | 993.53   | 497.27 | 8  |
| 11 | 1,501.76 | 751.38   | 1,484.73 | 742.87   | 1,483.75 | 742.38   | L | 874.48   | 437.74 | 857.45   | 429.23 | 856.47   | 428.74 | 7  |
| 12 | 1,614.84 | 807.92   | 1,597.81 | 799.41   | 1,596.83 | 798.92   | I | 761.40   | 381.20 | 744.37   | 372.69 | 743.39   | 372.20 | 6  |
| 13 | 1,728.88 | 864.95   | 1,711.86 | 856.43   | 1,710.87 | 855.94   | N | 648.31   | 324.66 | 631.29   | 316.15 | 630.30   | 315.65 | 5  |
| 14 | 1,859.92 | 930.47   | 1,842.90 | 921.95   | 1,841.91 | 921.46   | M | 534.27   | 267.64 | 517.24   | 259.13 | 516.26   | 258.63 | 4  |
| 15 | 1,958.99 | 980.00   | 1,941.97 | 971.49   | 1,940.98 | 970.99   | V | 403.23   | 202.12 | 386.20   | 193.61 | 385.22   | 193.11 | 3  |
| 16 | 2,088.03 | 1,044.52 | 2,071.01 | 1,036.01 | 2,070.02 | 1,035.52 | E | 304.16   | 152.58 | 287.13   | 144.07 | 286.15   | 143.58 | 2  |
| 17 |          |          |          |          |          |          | R | 175.12   | 88.06  | 158.09   | 79.55  |          |        | 1  |

Query 2450 Hit 1

MS/MS Fragmentation of **LAIQEALSMMVGAYSTLEGAQR**

Found in **sp|Q5VYK3|ECM29\_HUMAN**, Proteasome-associated protein ECM29 homolog OS=Homo sapiens GN=ECM29 PE=1 SV=2

Match to Query 2450: 2482.265from(828.4288,3+)

Title: 1381: Sum of 2 scans in range 3400 (rt=84.7827, f=4, i=948) to 3401 (rt=84.8081, f=4, i=949)

[D:\lab212\membrane\Grace\20120214\_iTRAQ\_1.raw]

Data File:

**Monoisotopic mass of neutral peptide Mr(calc): 2482.265**

**Variable modifications:**

**Ions Score: 57.2 Expect: 0.002**

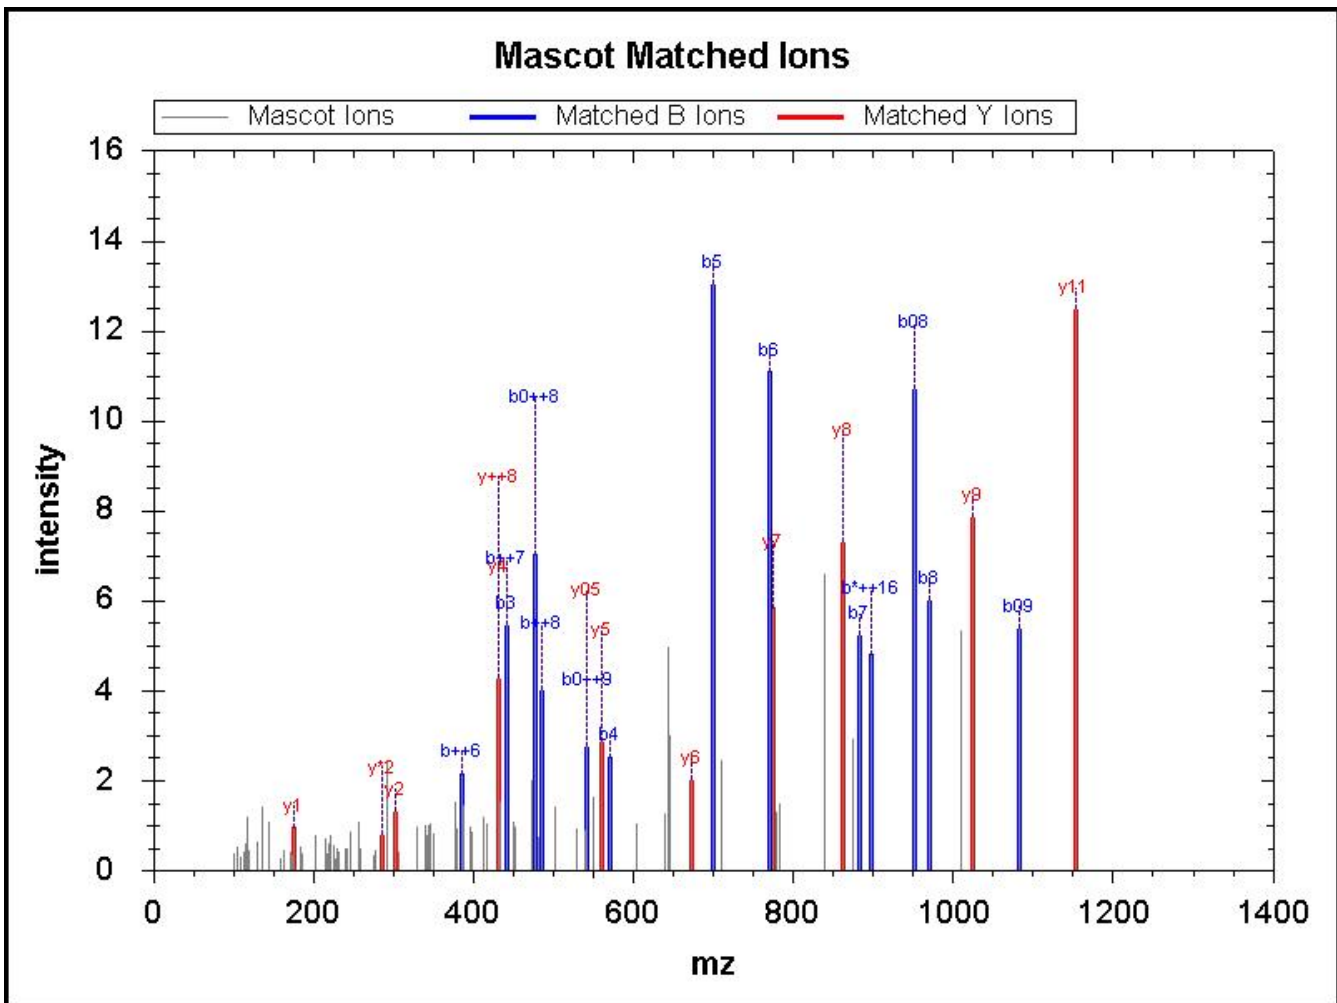

| No | b      | b++    | b* | b*++ | b0 | b0++ | Seq | y        | y++      | y*       | y*++     | y0       | y0++     | RevNo |
|----|--------|--------|----|------|----|------|-----|----------|----------|----------|----------|----------|----------|-------|
| 1  | 258.19 | 129.60 |    |      |    |      | L   |          |          |          |          |          |          | 22    |
| 2  | 329.23 | 165.12 |    |      |    |      | A   | 2,226.09 | 1,113.55 | 2,209.06 | 1,105.04 | 2,208.08 | 1,104.54 | 21    |
| 3  | 442.31 | 221.66 |    |      |    |      | I   | 2,155.05 | 1,078.03 | 2,138.03 | 1,069.52 | 2,137.04 | 1,069.02 | 20    |



|    |          |          |          |          |          |          |   |          |          |          |          |          |          |    |
|----|----------|----------|----------|----------|----------|----------|---|----------|----------|----------|----------|----------|----------|----|
| 4  | 570.37   | 285.69   | 553.35   | 277.18   |          |          | Q | 2,041.97 | 1,021.49 | 2,024.94 | 1,012.97 | 2,023.96 | 1,012.48 | 19 |
| 5  | 699.42   | 350.21   | 682.39   | 341.70   | 681.41   | 341.21   | E | 1,913.91 | 957.46   | 1,896.88 | 948.95   | 1,895.90 | 948.45   | 18 |
| 6  | 770.45   | 385.73   | 753.43   | 377.22   | 752.44   | 376.72   | A | 1,784.87 | 892.94   | 1,767.84 | 884.42   | 1,766.86 | 883.93   | 17 |
| 7  | 883.54   | 442.27   | 866.51   | 433.76   | 865.53   | 433.27   | L | 1,713.83 | 857.42   | 1,696.80 | 848.91   | 1,695.82 | 848.41   | 16 |
| 8  | 970.57   | 485.79   | 953.54   | 477.27   | 952.56   | 476.78   | S | 1,600.75 | 800.88   | 1,583.72 | 792.36   | 1,582.74 | 791.87   | 15 |
| 9  | 1,101.61 | 551.31   | 1,084.58 | 542.80   | 1,083.60 | 542.30   | M | 1,513.71 | 757.36   | 1,496.69 | 748.85   | 1,495.70 | 748.36   | 14 |
| 10 | 1,232.65 | 616.83   | 1,215.62 | 608.32   | 1,214.64 | 607.82   | M | 1,382.67 | 691.84   | 1,365.65 | 683.33   | 1,364.66 | 682.83   | 13 |
| 11 | 1,331.72 | 666.36   | 1,314.69 | 657.85   | 1,313.71 | 657.36   | V | 1,251.63 | 626.32   | 1,234.61 | 617.81   | 1,233.62 | 617.31   | 12 |
| 12 | 1,388.74 | 694.87   | 1,371.71 | 686.36   | 1,370.73 | 685.87   | G | 1,152.56 | 576.79   | 1,135.54 | 568.27   | 1,134.55 | 567.78   | 11 |
| 13 | 1,459.78 | 730.39   | 1,442.75 | 721.88   | 1,441.77 | 721.39   | A | 1,095.54 | 548.28   | 1,078.52 | 539.76   | 1,077.53 | 539.27   | 10 |
| 14 | 1,622.84 | 811.92   | 1,605.81 | 803.41   | 1,604.83 | 802.92   | Y | 1,024.51 | 512.76   | 1,007.48 | 504.24   | 1,006.50 | 503.75   | 9  |
| 15 | 1,709.87 | 855.44   | 1,692.85 | 846.93   | 1,691.86 | 846.43   | S | 861.44   | 431.22   | 844.42   | 422.71   | 843.43   | 422.22   | 8  |
| 16 | 1,810.92 | 905.96   | 1,793.89 | 897.45   | 1,792.91 | 896.96   | T | 774.41   | 387.71   | 757.38   | 379.20   | 756.40   | 378.70   | 7  |
| 17 | 1,924.00 | 962.51   | 1,906.98 | 953.99   | 1,905.99 | 953.50   | L | 673.36   | 337.18   | 656.34   | 328.67   | 655.35   | 328.18   | 6  |
| 18 | 2,053.05 | 1,027.03 | 2,036.02 | 1,018.51 | 2,035.04 | 1,018.02 | E | 560.28   | 280.64   | 543.25   | 272.13   | 542.27   | 271.64   | 5  |
| 19 | 2,110.07 | 1,055.54 | 2,093.04 | 1,047.02 | 2,092.06 | 1,046.53 | G | 431.24   | 216.12   | 414.21   | 207.61   |          |          | 4  |
| 20 | 2,181.11 | 1,091.06 | 2,164.08 | 1,082.54 | 2,163.09 | 1,082.05 | A | 374.21   | 187.61   | 357.19   | 179.10   |          |          | 3  |
| 21 | 2,309.16 | 1,155.09 | 2,292.14 | 1,146.57 | 2,291.15 | 1,146.08 | Q | 303.18   | 152.09   | 286.15   | 143.58   |          |          | 2  |
| 22 |          |          |          |          |          |          | R | 175.12   | 88.06    | 158.09   | 79.55    |          |          | 1  |

Query 1037 Hit 1

MS/MS Fragmentation of **LVAIVDVIDQNR**

Found in **sp|P50914|RL14\_HUMAN**, 60S ribosomal protein L14 OS=Homo sapiens GN=RPL14 PE=1 SV=4

Match to Query 1037: 1497.863from(749.9385,2+)

Title: 877: Sum of 2 scans in range 2268 (rt=59.3635, f=4, i=581) to 2269 (rt=59.3889, f=4, i=582)

[D:\lab212\membrane\Grace\20120214\_iTRAQ\_2.raw]

Data File:

**Monoisotopic mass of neutral peptide Mr(calc):** 1497.863

**Variable modifications:**

**Ions Score:** 57.88 **Expect:** 0.001



### Mascot Matched Ions

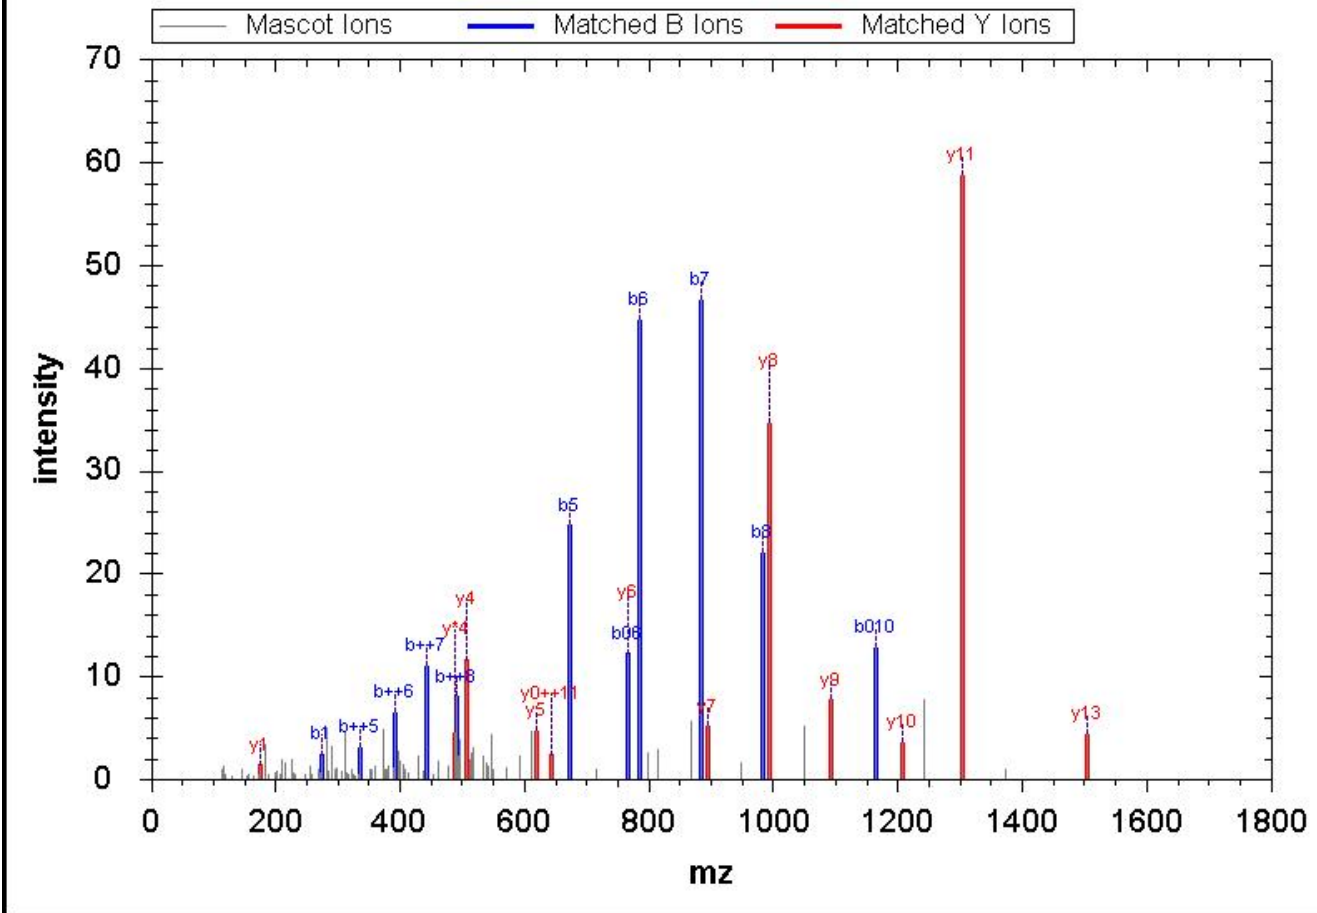

| No | b             | b++           | b*       | b*++     | b0              | b0++     | Seq | y               | y++      | y*            | y*++     | y0       | y0++          | RevNo |
|----|---------------|---------------|----------|----------|-----------------|----------|-----|-----------------|----------|---------------|----------|----------|---------------|-------|
| 1  | <b>274.15</b> | 137.58        |          |          | 256.14          | 128.57   | E   |                 |          |               |          |          |               | 22    |
| 2  | 371.20        | 186.11        |          |          | 353.19          | 177.10   | P   | 2,325.29        | 1,163.15 | 2,308.26      | 1,154.63 | 2,307.27 | 1,154.14      | 21    |
| 3  | 428.23        | 214.62        |          |          | 410.22          | 205.61   | G   | 2,228.23        | 1,114.62 | 2,211.21      | 1,106.11 | 2,210.22 | 1,105.61      | 20    |
| 4  | 556.28        | 278.65        | 539.26   | 270.13   | 538.27          | 269.64   | Q   | 2,171.21        | 1,086.11 | 2,154.18      | 1,077.60 | 2,153.20 | 1,077.10      | 19    |
| 5  | <b>671.31</b> | <b>336.16</b> | 654.29   | 327.65   | 653.30          | 327.15   | D   | 2,043.15        | 1,022.08 | 2,026.13      | 1,013.57 | 2,025.14 | 1,013.07      | 18    |
| 6  | <b>784.40</b> | <b>392.70</b> | 767.37   | 384.19   | <b>766.39</b>   | 383.70   | L   | 1,928.13        | 964.57   | 1,911.10      | 956.05   | 1,910.11 | 955.56        | 17    |
| 7  | <b>883.46</b> | <b>442.24</b> | 866.44   | 433.72   | 865.45          | 433.23   | V   | 1,815.04        | 908.02   | 1,798.02      | 899.51   | 1,797.03 | 899.02        | 16    |
| 8  | <b>982.53</b> | <b>491.77</b> | 965.51   | 483.26   | 964.52          | 482.76   | V   | 1,715.97        | 858.49   | 1,698.95      | 849.98   | 1,697.96 | 849.48        | 15    |
| 9  | 1,095.62      | 548.31        | 1,078.59 | 539.80   | 1,077.61        | 539.31   | L   | 1,616.90        | 808.96   | 1,599.88      | 800.44   | 1,598.89 | 799.95        | 14    |
| 10 | 1,182.65      | 591.83        | 1,165.62 | 583.31   | <b>1,164.64</b> | 582.82   | S   | <b>1,503.82</b> | 752.41   | 1,486.79      | 743.90   | 1,485.81 | 743.41        | 13    |
| 11 | 1,295.73      | 648.37        | 1,278.71 | 639.86   | 1,277.72        | 639.36   | L   | 1,416.79        | 708.90   | 1,399.76      | 700.38   | 1,398.78 | 699.89        | 12    |
| 12 | 1,392.79      | 696.90        | 1,375.76 | 688.38   | 1,374.77        | 687.89   | P   | <b>1,303.70</b> | 652.36   | 1,286.68      | 643.84   | 1,285.69 | <b>643.35</b> | 11    |
| 13 | 1,505.87      | 753.44        | 1,488.84 | 744.93   | 1,487.86        | 744.43   | I   | <b>1,206.65</b> | 603.83   | 1,189.63      | 595.32   | 1,188.64 | 594.82        | 10    |
| 14 | 1,606.92      | 803.96        | 1,589.89 | 795.45   | 1,588.91        | 794.96   | T   | <b>1,093.57</b> | 547.29   | 1,076.54      | 538.77   | 1,075.56 | 538.28        | 9     |
| 15 | 1,703.97      | 852.49        | 1,686.94 | 843.98   | 1,685.96        | 843.48   | P   | <b>992.52</b>   | 496.76   | 975.49        | 488.25   | 974.51   | 487.76        | 8     |
| 16 | 1,833.01      | 917.01        | 1,815.99 | 908.50   | 1,815.00        | 908.00   | E   | <b>895.47</b>   | 448.24   | 878.44        | 439.72   | 877.46   | 439.23        | 7     |
| 17 | 1,980.08      | 990.54        | 1,963.05 | 982.03   | 1,962.07        | 981.54   | F   | <b>766.42</b>   | 383.72   | 749.40        | 375.20   | 748.41   | 374.71        | 6     |
| 18 | 2,093.17      | 1,047.09      | 2,076.14 | 1,038.57 | 2,075.15        | 1,038.08 | I   | <b>619.36</b>   | 310.18   | 602.33        | 301.67   | 601.35   | 301.18        | 5     |
| 19 | 2,190.22      | 1,095.61      | 2,173.19 | 1,087.10 | 2,172.21        | 1,086.61 | P   | <b>506.27</b>   | 253.64   | <b>489.25</b> | 245.13   | 488.26   | 244.63        | 4     |
| 20 | 2,277.25      | 1,139.13      | 2,260.22 | 1,130.62 | 2,259.24        | 1,130.12 | S   | 409.22          | 205.11   | 392.19        | 196.60   | 391.21   | 196.11        | 3     |
| 21 | 2,424.32      | 1,212.66      | 2,407.29 | 1,204.15 | 2,406.31        | 1,203.66 | F   | 322.19          | 161.60   | 305.16        | 153.08   |          |               | 2     |
| 22 |               |               |          |          |                 |          | R   | <b>175.12</b>   | 88.06    | 158.09        | 79.55    |          |               | 1     |

MS/MS Fragmentation of **GVDNTFADELVELSTALEHQEYITFLEDLK**

Found in **sp|Q07021|C1QBP\_HUMAN**, Complement component 1 Q subcomponent-binding protein

Match to Query 2974: 3726.873 from (932.7254,4+)

Title: 1431: Sum of 2 scans in range 3483 (rt=86.6746, f=4, i=949) to 3484 (rt=86.7, f=4, i=950)

[D:\lab212\membrane\Grace\20120214\_iTRAQ\_2.raw]

Data File:

**Monoisotopic mass of neutral peptide Mr(calc): 3726.873**

**Variable modifications:**

**K30** iTRAQ4plex (K)

**Ions Score: 58.39 Expect: 0.001**

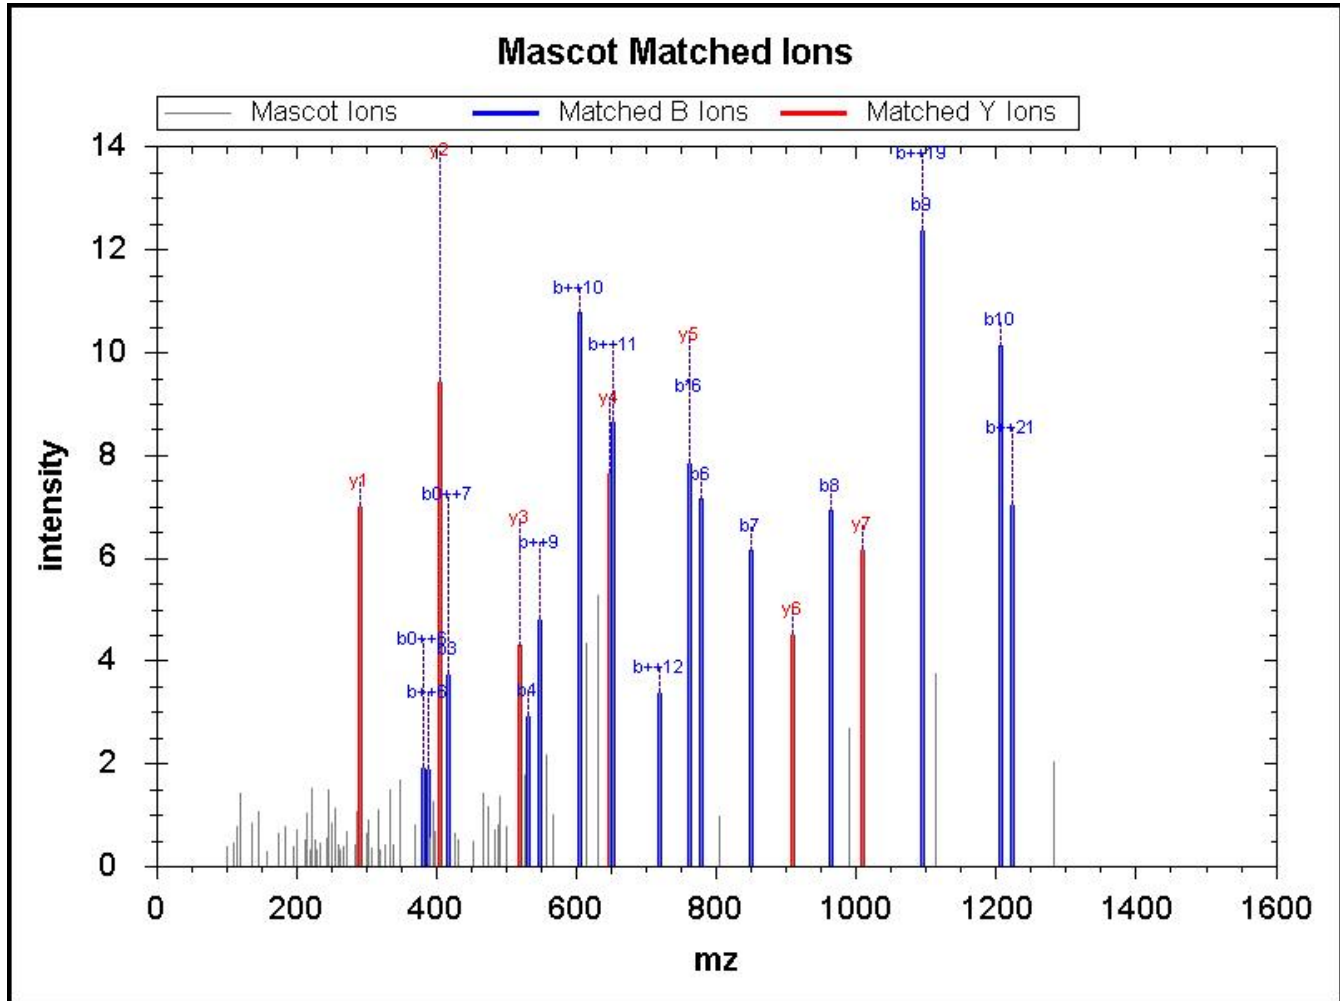

| No | b               | b++           | b*            | b*++   | b0       | b0++          | Seq | y        | y++      | y*       | y*++     | y0       | y0++     | RevNo |
|----|-----------------|---------------|---------------|--------|----------|---------------|-----|----------|----------|----------|----------|----------|----------|-------|
| 1  | 202.13          | 101.57        |               |        |          |               | G   |          |          |          |          |          |          | 30    |
| 2  | 301.20          | 151.10        |               |        |          |               | V   | 3,526.76 | 1,763.88 | 3,509.73 | 1,755.37 | 3,508.75 | 1,754.88 | 29    |
| 3  | <b>416.23</b>   | 208.62        |               |        | 398.22   | 199.61        | D   | 3,427.69 | 1,714.35 | 3,410.66 | 1,705.84 | 3,409.68 | 1,705.34 | 28    |
| 4  | <b>530.27</b>   | 265.64        | 513.24        | 257.12 | 512.26   | 256.63        | N   | 3,312.66 | 1,656.84 | 3,295.64 | 1,648.32 | 3,294.65 | 1,647.83 | 27    |
| 5  | 631.32          | 316.16        | 614.29        | 307.65 | 613.31   | 307.16        | T   | 3,198.62 | 1,599.81 | 3,181.59 | 1,591.30 | 3,180.61 | 1,590.81 | 26    |
| 6  | <b>778.39</b>   | <b>389.70</b> | <b>761.36</b> | 381.18 | 760.37   | <b>380.69</b> | F   | 3,097.57 | 1,549.29 | 3,080.55 | 1,540.78 | 3,079.56 | 1,540.29 | 25    |
| 7  | <b>849.42</b>   | 425.21        | 832.40        | 416.70 | 831.41   | <b>416.21</b> | A   | 2,950.50 | 1,475.76 | 2,933.48 | 1,467.24 | 2,932.49 | 1,466.75 | 24    |
| 8  | <b>964.45</b>   | 482.73        | 947.42        | 474.21 | 946.44   | 473.72        | D   | 2,879.47 | 1,440.24 | 2,862.44 | 1,431.72 | 2,861.46 | 1,431.23 | 23    |
| 9  | <b>1,093.49</b> | <b>547.25</b> | 1,076.47      | 538.74 | 1,075.48 | 538.24        | E   | 2,764.44 | 1,382.72 | 2,747.41 | 1,374.21 | 2,746.43 | 1,373.72 | 22    |
| 10 | <b>1,206.58</b> | <b>603.79</b> | 1,189.55      | 595.28 | 1,188.57 | 594.79        | L   | 2,635.40 | 1,318.20 | 2,618.37 | 1,309.69 | 2,617.39 | 1,309.20 | 21    |
| 11 | 1,305.64        | <b>653.33</b> | 1,288.62      | 644.81 | 1,287.63 | 644.32        | V   | 2,522.31 | 1,261.66 | 2,505.29 | 1,253.15 | 2,504.30 | 1,252.66 | 20    |
| 12 | 1,434.69        | <b>717.85</b> | 1,417.66      | 709.33 | 1,416.68 | 708.84        | E   | 2,423.25 | 1,212.13 | 2,406.22 | 1,203.61 | 2,405.24 | 1,203.12 | 19    |
| 13 | 1,547.77        | 774.39        | 1,530.74      | 765.88 | 1,529.76 | 765.38        | L   | 2,294.20 | 1,147.61 | 2,277.18 | 1,139.09 | 2,276.19 | 1,138.60 | 18    |
| 14 | 1,634.80        | 817.91        | 1,617.78      | 809.39 | 1,616.79 | 808.90        | S   | 2,181.12 | 1,091.06 | 2,164.09 | 1,082.55 | 2,163.11 | 1,082.06 | 17    |
| 15 | 1,735.85        | 868.43        | 1,718.82      | 859.92 | 1,717.84 | 859.42        | T   | 2,094.09 | 1,047.55 | 2,077.06 | 1,039.03 | 2,076.08 | 1,038.54 | 16    |

|    |          |          |          |          |          |          |   |          |        |          |        |          |        |    |
|----|----------|----------|----------|----------|----------|----------|---|----------|--------|----------|--------|----------|--------|----|
| 16 | 1,806.89 | 903.95   | 1,789.86 | 895.43   | 1,788.88 | 894.94   | A | 1,993.04 | 997.02 | 1,976.01 | 988.51 | 1,975.03 | 988.02 | 15 |
| 17 | 1,919.97 | 960.49   | 1,902.95 | 951.98   | 1,901.96 | 951.48   | L | 1,922.00 | 961.51 | 1,904.98 | 952.99 | 1,903.99 | 952.50 | 14 |
| 18 | 2,049.01 | 1,025.01 | 2,031.99 | 1,016.50 | 2,031.00 | 1,016.01 | E | 1,808.92 | 904.96 | 1,791.89 | 896.45 | 1,790.91 | 895.96 | 13 |
| 19 | 2,186.07 | 1,093.54 | 2,169.05 | 1,085.03 | 2,168.06 | 1,084.54 | H | 1,679.88 | 840.44 | 1,662.85 | 831.93 | 1,661.87 | 831.44 | 12 |
| 20 | 2,314.13 | 1,157.57 | 2,297.11 | 1,149.06 | 2,296.12 | 1,148.56 | Q | 1,542.82 | 771.91 | 1,525.79 | 763.40 | 1,524.81 | 762.91 | 11 |
| 21 | 2,443.17 | 1,222.09 | 2,426.15 | 1,213.58 | 2,425.16 | 1,213.09 | E | 1,414.76 | 707.88 | 1,397.73 | 699.37 | 1,396.75 | 698.88 | 10 |
| 22 | 2,606.24 | 1,303.62 | 2,589.21 | 1,295.11 | 2,588.23 | 1,294.62 | Y | 1,285.72 | 643.36 | 1,268.69 | 634.85 | 1,267.71 | 634.36 | 9  |
| 23 | 2,719.32 | 1,360.16 | 2,702.29 | 1,351.65 | 2,701.31 | 1,351.16 | I | 1,122.65 | 561.83 | 1,105.63 | 553.32 | 1,104.64 | 552.82 | 8  |
| 24 | 2,820.37 | 1,410.69 | 2,803.34 | 1,402.17 | 2,802.36 | 1,401.68 | T | 1,009.57 | 505.29 | 992.54   | 496.77 | 991.56   | 496.28 | 7  |
| 25 | 2,967.44 | 1,484.22 | 2,950.41 | 1,475.71 | 2,949.43 | 1,475.22 | F | 908.52   | 454.76 | 891.49   | 446.25 | 890.51   | 445.76 | 6  |
| 26 | 3,080.52 | 1,540.76 | 3,063.49 | 1,532.25 | 3,062.51 | 1,531.76 | L | 761.45   | 381.23 | 744.43   | 372.72 | 743.44   | 372.22 | 5  |
| 27 | 3,209.56 | 1,605.29 | 3,192.54 | 1,596.77 | 3,191.55 | 1,596.28 | E | 648.37   | 324.69 | 631.34   | 316.17 | 630.36   | 315.68 | 4  |
| 28 | 3,324.59 | 1,662.80 | 3,307.56 | 1,654.29 | 3,306.58 | 1,653.79 | D | 519.33   | 260.17 | 502.30   | 251.65 | 501.32   | 251.16 | 3  |
| 29 | 3,437.67 | 1,719.34 | 3,420.65 | 1,710.83 | 3,419.66 | 1,710.34 | L | 404.30   | 202.65 | 387.27   | 194.14 |          |        | 2  |
| 30 |          |          |          |          |          |          | K | 291.21   | 146.11 | 274.19   | 137.60 |          |        | 1  |

Query 2295 Hit 1

MS/MS Fragmentation of **TWWNQFSVTALQLLQANR**

Found in **sp|Q99536|VAT1\_HUMAN**, Synaptic vesicle membrane protein VAT-1 homolog OS=Homo sapiens GN=VAT1 PE=1 SV=2

Match to Query 2295: 2319.229from(774.0835,3+)

Title: 1229: Scan 3054 (rt=76.9883, f=3, i=434) [D:\lab212\membrane\Grace\20120214\_iTRAQ\_1.raw]

Data File:

**Monoisotopic mass of neutral peptide Mr(calc): 2319.229**

**Variable modifications:**

**Ions Score: 59.23 Expect: 0.001**

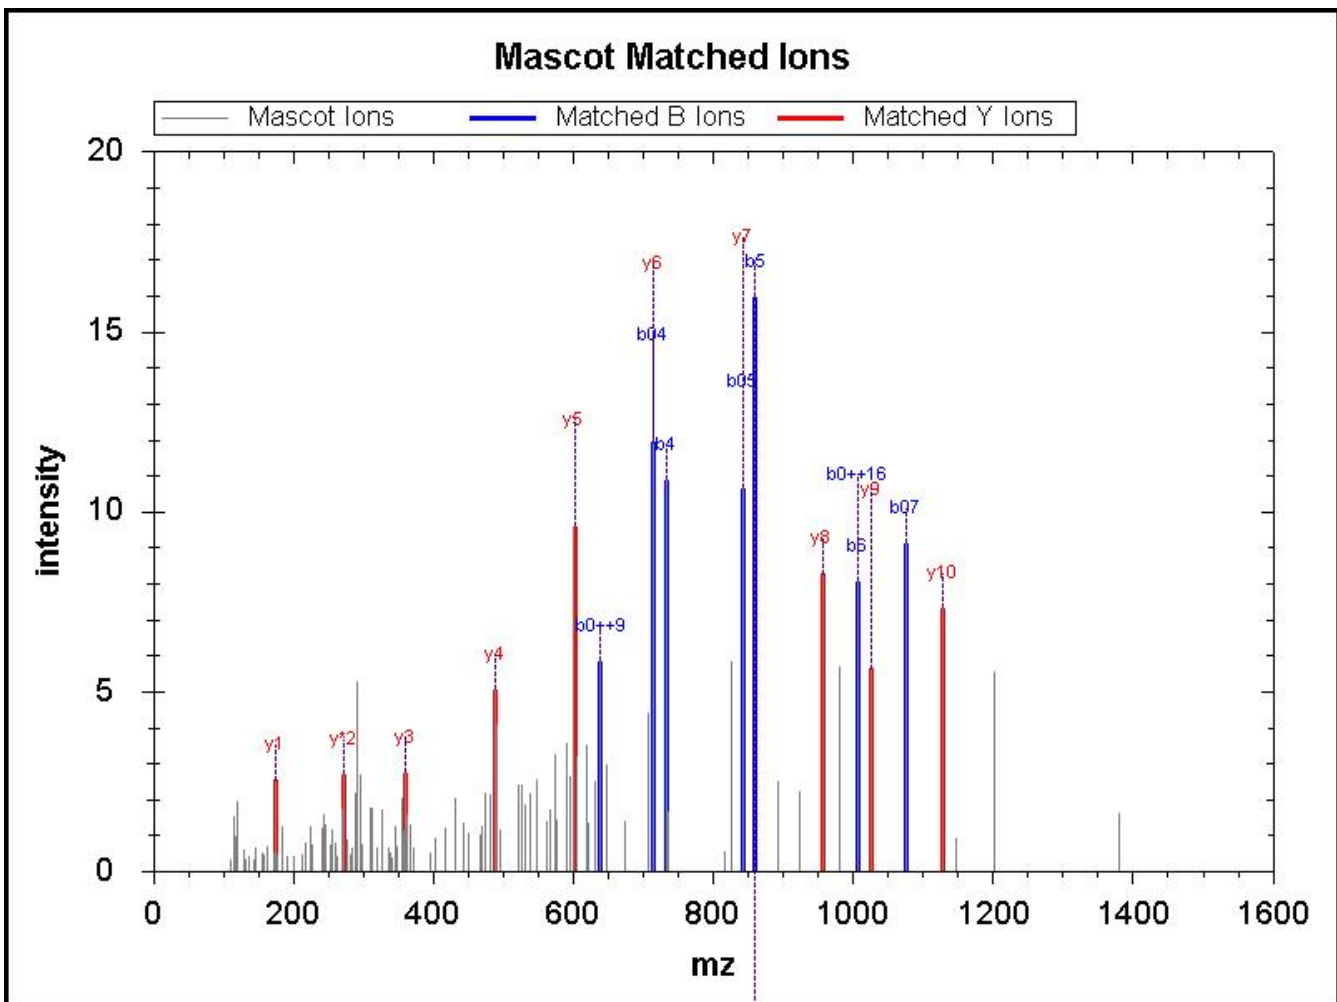

| No | b | b++ | b* | b*** | b0 | b0++ | Seq | y | y++ | y* | y*** | y0 | y0++ | RevNo |
|----|---|-----|----|------|----|------|-----|---|-----|----|------|----|------|-------|
|----|---|-----|----|------|----|------|-----|---|-----|----|------|----|------|-------|

|    |          |          |          |          |          |          |   |          |          |          |          |          |          |    |
|----|----------|----------|----------|----------|----------|----------|---|----------|----------|----------|----------|----------|----------|----|
| 1  | 246.16   | 123.58   |          |          | 228.15   | 114.58   | T |          |          |          |          |          |          | 18 |
| 2  | 432.24   | 216.62   |          |          | 414.23   | 207.62   | W | 2,075.08 | 1,038.04 | 2,058.06 | 1,029.53 | 2,057.07 | 1,029.04 | 17 |
| 3  | 618.32   | 309.66   |          |          | 600.31   | 300.66   | W | 1,889.00 | 945.01   | 1,871.98 | 936.49   | 1,870.99 | 936.00   | 16 |
| 4  | 732.36   | 366.68   | 715.33   | 358.17   | 714.35   | 357.68   | N | 1,702.92 | 851.97   | 1,685.90 | 843.45   | 1,684.91 | 842.96   | 15 |
| 5  | 860.42   | 430.71   | 843.39   | 422.20   | 842.41   | 421.71   | Q | 1,588.88 | 794.94   | 1,571.85 | 786.43   | 1,570.87 | 785.94   | 14 |
| 6  | 1,007.49 | 504.25   | 990.46   | 495.73   | 989.47   | 495.24   | F | 1,460.82 | 730.91   | 1,443.80 | 722.40   | 1,442.81 | 721.91   | 13 |
| 7  | 1,094.52 | 547.76   | 1,077.49 | 539.25   | 1,076.51 | 538.76   | S | 1,313.75 | 657.38   | 1,296.73 | 648.87   | 1,295.74 | 648.38   | 12 |
| 8  | 1,193.59 | 597.30   | 1,176.56 | 588.78   | 1,175.58 | 588.29   | V | 1,226.72 | 613.86   | 1,209.69 | 605.35   | 1,208.71 | 604.86   | 11 |
| 9  | 1,294.63 | 647.82   | 1,277.61 | 639.31   | 1,276.62 | 638.82   | T | 1,127.65 | 564.33   | 1,110.63 | 555.82   | 1,109.64 | 555.32   | 10 |
| 10 | 1,365.67 | 683.34   | 1,348.64 | 674.83   | 1,347.66 | 674.33   | A | 1,026.61 | 513.81   | 1,009.58 | 505.29   |          |          | 9  |
| 11 | 1,478.75 | 739.88   | 1,461.73 | 731.37   | 1,460.74 | 730.88   | L | 955.57   | 478.29   | 938.54   | 469.77   |          |          | 8  |
| 12 | 1,606.81 | 803.91   | 1,589.79 | 795.40   | 1,588.80 | 794.91   | Q | 842.48   | 421.75   | 825.46   | 413.23   |          |          | 7  |
| 13 | 1,719.90 | 860.45   | 1,702.87 | 851.94   | 1,701.89 | 851.45   | L | 714.43   | 357.72   | 697.40   | 349.20   |          |          | 6  |
| 14 | 1,832.98 | 916.99   | 1,815.96 | 908.48   | 1,814.97 | 907.99   | L | 601.34   | 301.17   | 584.32   | 292.66   |          |          | 5  |
| 15 | 1,961.04 | 981.02   | 1,944.01 | 972.51   | 1,943.03 | 972.02   | Q | 488.26   | 244.63   | 471.23   | 236.12   |          |          | 4  |
| 16 | 2,032.08 | 1,016.54 | 2,015.05 | 1,008.03 | 2,014.07 | 1,007.54 | A | 360.20   | 180.60   | 343.17   | 172.09   |          |          | 3  |
| 17 | 2,146.12 | 1,073.56 | 2,129.09 | 1,065.05 | 2,128.11 | 1,064.56 | N | 289.16   | 145.08   | 272.14   | 136.57   |          |          | 2  |
| 18 |          |          |          |          |          |          | R | 175.12   | 88.06    | 158.09   | 79.55    |          |          | 1  |

Query 547 Hit 1

MS/MS Fragmentation of **GFGFILFK**

Found in **sp|Q99729|ROAA\_HUMAN**, Heterogeneous nuclear ribonucleoprotein A/B OS=Homo sapiens GN=HNRNPAB PE=1 SV=2

Match to Query 547: 1215.729from(608.8715,2+)

Title: 952: Scan 2465 (rt=63.7162, f=3, i=339) [D:\lab212\membrane\Grace\20120214\_iTRAQ\_1.raw]

Data File:

**Monoisotopic mass of neutral peptide Mr(calc):** 1215.729

**Variable modifications:**

**K8** :iTRAQ4plex (K)

**Ions Score:** 59.85 **Expect:** 0.001

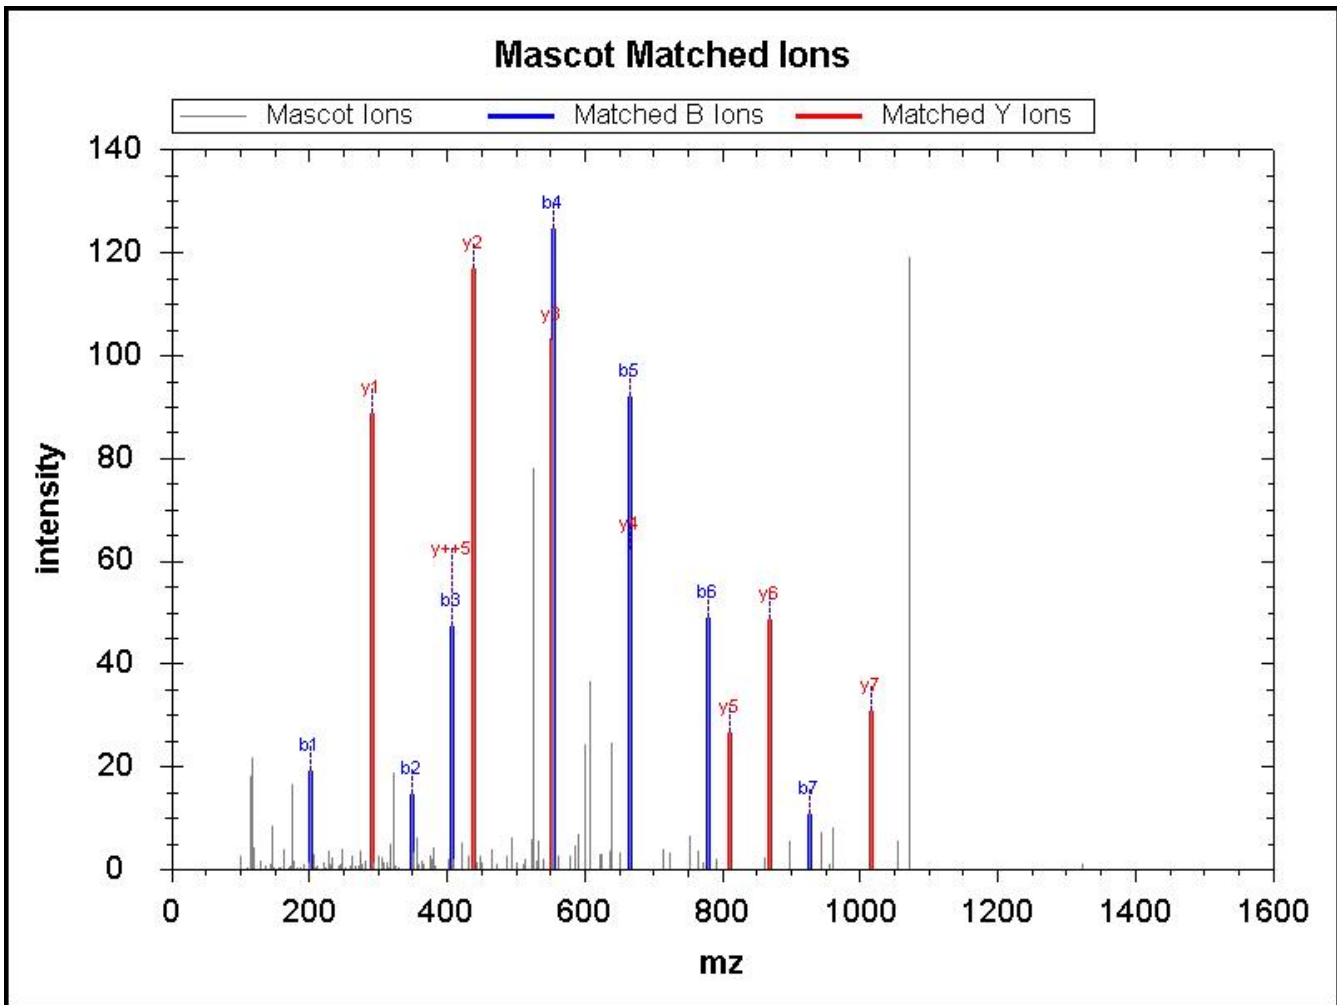

| No | b      | b++    | Seq | y        | y++    | y*     | y*++   | RevNo |
|----|--------|--------|-----|----------|--------|--------|--------|-------|
| 1  | 202.13 | 101.57 | G   |          |        |        |        | 8     |
| 2  | 349.20 | 175.10 | F   | 1,015.61 | 508.31 | 998.58 | 499.80 | 7     |
| 3  | 406.22 | 203.61 | G   | 868.54   | 434.77 | 851.51 | 426.26 | 6     |
| 4  | 553.29 | 277.15 | F   | 811.52   | 406.26 | 794.49 | 397.75 | 5     |
| 5  | 666.37 | 333.69 | I   | 664.45   | 332.73 | 647.42 | 324.22 | 4     |
| 6  | 779.46 | 390.23 | L   | 551.37   | 276.19 | 534.34 | 267.67 | 3     |
| 7  | 926.53 | 463.77 | F   | 438.28   | 219.65 | 421.26 | 211.13 | 2     |
| 8  |        |        | K   | 291.21   | 146.11 | 274.19 | 137.60 | 1     |

Query 2094 Hit 1

MS/MS Fragmentation of **TLMELLNQMDGFDTLHR**

Found in **sp|P62333|PRS10\_HUMAN**, 26S protease regulatory subunit 10B OS=Homo sapiens GN=PSMC6 PE=1 SV=1

Match to Query 2094: 2177.073from(726.6984,3+)

Title: 1135: Scan 2806 (rt=71.4842, f=3, i=407) [D:\lab212\membrane\Grace\20120214\_iTRAQ\_2.raw]

Data File:

**Monoisotopic mass of neutral peptide Mr(calc): 2177.073**

**Variable modifications:**

**Ions Score: 59.86 Expect: 0.001**

### Mascot Matched Ions

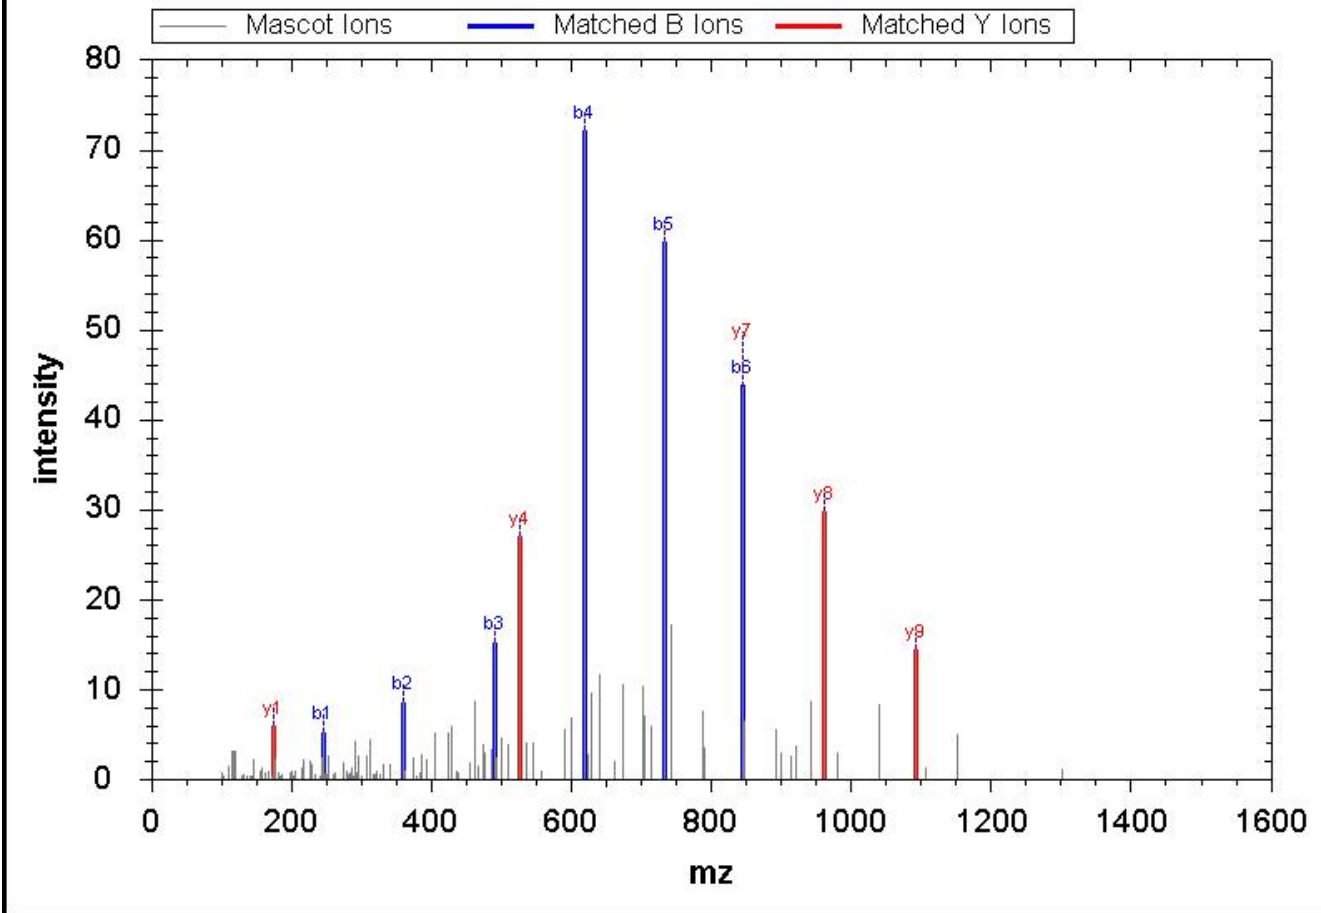

| No | b        | b++      | b*       | b*++   | b0       | b0++   | Seq | y        | y++    | y*       | y*++   | y0       | y0++   | RevNo |
|----|----------|----------|----------|--------|----------|--------|-----|----------|--------|----------|--------|----------|--------|-------|
| 1  | 246.16   | 123.58   |          |        | 228.15   | 114.58 | T   |          |        |          |        |          |        | 17    |
| 2  | 359.24   | 180.12   |          |        | 341.23   | 171.12 | L   | 1,932.93 | 966.97 | 1,915.90 | 958.46 | 1,914.92 | 957.96 | 16    |
| 3  | 490.28   | 245.64   |          |        | 472.27   | 236.64 | M   | 1,819.85 | 910.43 | 1,802.82 | 901.91 | 1,801.84 | 901.42 | 15    |
| 4  | 619.32   | 310.17   |          |        | 601.31   | 301.16 | E   | 1,688.81 | 844.91 | 1,671.78 | 836.39 | 1,670.80 | 835.90 | 14    |
| 5  | 732.41   | 366.71   |          |        | 714.40   | 357.70 | L   | 1,559.76 | 780.39 | 1,542.74 | 771.87 | 1,541.75 | 771.38 | 13    |
| 6  | 845.49   | 423.25   |          |        | 827.48   | 414.24 | L   | 1,446.68 | 723.84 | 1,429.65 | 715.33 | 1,428.67 | 714.84 | 12    |
| 7  | 959.54   | 480.27   | 942.51   | 471.76 | 941.52   | 471.27 | N   | 1,333.60 | 667.30 | 1,316.57 | 658.79 | 1,315.58 | 658.30 | 11    |
| 8  | 1,087.59 | 544.30   | 1,070.57 | 535.79 | 1,069.58 | 535.30 | Q   | 1,219.55 | 610.28 | 1,202.53 | 601.77 | 1,201.54 | 601.27 | 10    |
| 9  | 1,218.63 | 609.82   | 1,201.61 | 601.31 | 1,200.62 | 600.82 | M   | 1,091.49 | 546.25 | 1,074.47 | 537.74 | 1,073.48 | 537.25 | 9     |
| 10 | 1,333.66 | 667.33   | 1,316.63 | 658.82 | 1,315.65 | 658.33 | D   | 960.45   | 480.73 | 943.43   | 472.22 | 942.44   | 471.73 | 8     |
| 11 | 1,390.68 | 695.85   | 1,373.66 | 687.33 | 1,372.67 | 686.84 | G   | 845.43   | 423.22 | 828.40   | 414.70 | 827.42   | 414.21 | 7     |
| 12 | 1,537.75 | 769.38   | 1,520.72 | 760.87 | 1,519.74 | 760.37 | F   | 788.40   | 394.71 | 771.38   | 386.19 | 770.39   | 385.70 | 6     |
| 13 | 1,652.78 | 826.89   | 1,635.75 | 818.38 | 1,634.77 | 817.89 | D   | 641.34   | 321.17 | 624.31   | 312.66 | 623.33   | 312.17 | 5     |
| 14 | 1,753.83 | 877.42   | 1,736.80 | 868.90 | 1,735.82 | 868.41 | T   | 526.31   | 263.66 | 509.28   | 255.15 | 508.30   | 254.65 | 4     |
| 15 | 1,866.91 | 933.96   | 1,849.88 | 925.45 | 1,848.90 | 924.95 | L   | 425.26   | 213.13 | 408.24   | 204.62 |          |        | 3     |
| 16 | 2,003.97 | 1,002.49 | 1,986.94 | 993.97 | 1,985.96 | 993.48 | H   | 312.18   | 156.59 | 295.15   | 148.08 |          |        | 2     |
| 17 |          |          |          |        |          |        | R   | 175.12   | 88.06  | 158.09   | 79.55  |          |        | 1     |

Query 2901 Hit 1

MS/MS Fragmentation of **FISDKDASIVGFFDDSFSEAHSEFLK**

Found in **sp|P30101|PDIA3\_HUMAN**, Protein disulfide-isomerase A3 OS=Homo sapiens GN=PDIA3 PE=1 SV=4

Match to Query 2901: 3369.674from(843.4258,4+)

Title: 1025: Sum of 2 scans in range 2615 (rt=67.0984, f=4, i=696) to 2616 (rt=67.1238, f=4, i=697)

[D:\lab212\membrane\Grace\20120214\_iTRAQ\_1.raw]



Data File:

**Monoisotopic mass of neutral peptide Mr(calc):** 3369.674

**Variable modifications:**

**K5** iTRAQ4plex (K)

**K26** iTRAQ4plex (K)

**Ions Score:** 60.72 **Expect:** 0.001

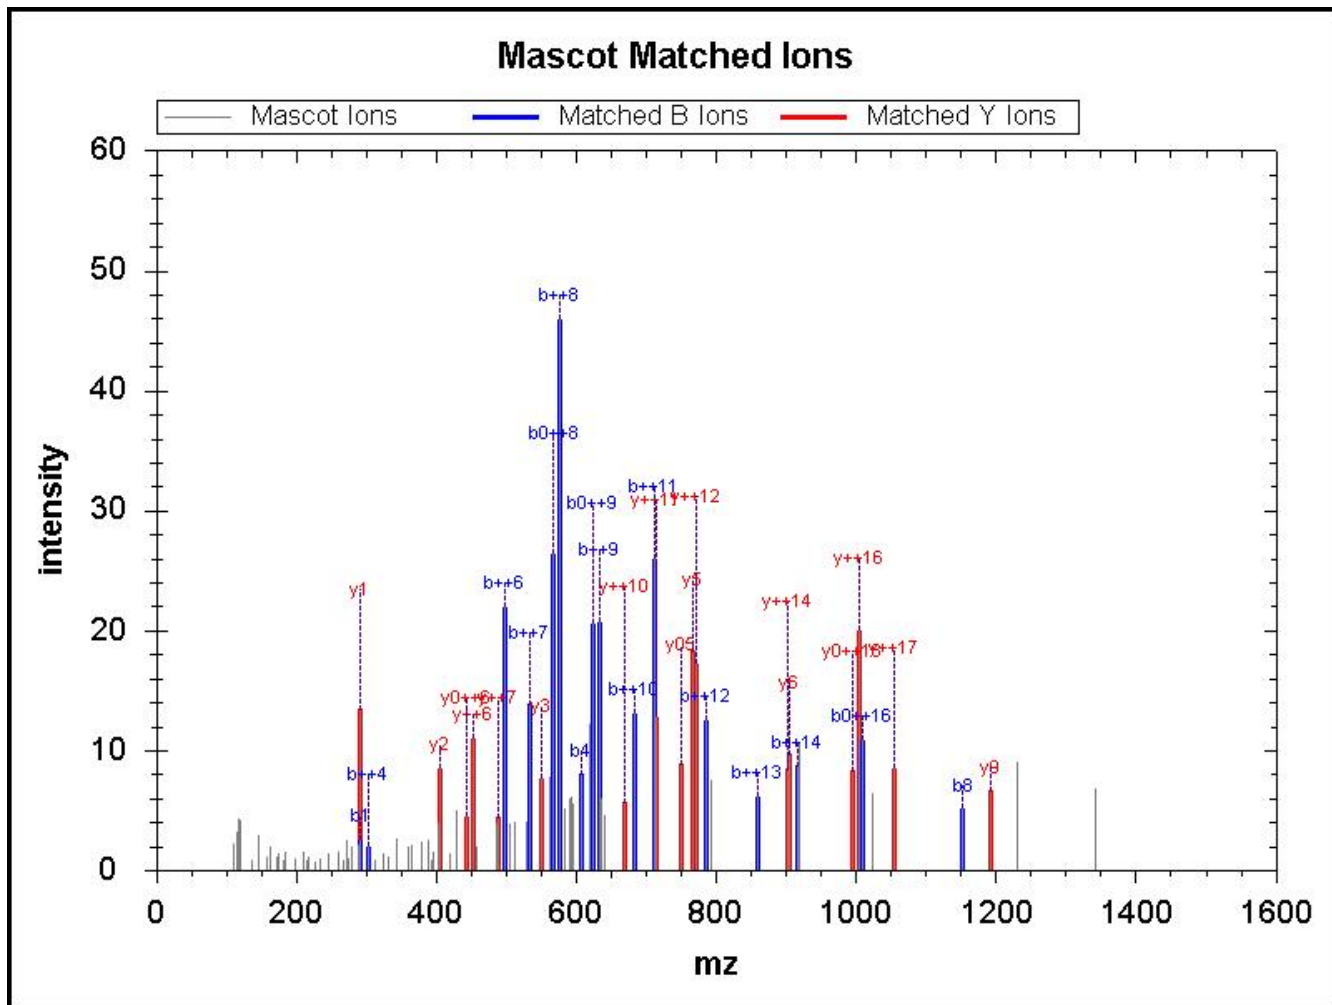

| No | b        | b++      | b*       | b*++     | b0       | b0++     | Seq | y        | y++      | y*       | y*++     | y0       | y0++     | RevNo |
|----|----------|----------|----------|----------|----------|----------|-----|----------|----------|----------|----------|----------|----------|-------|
| 1  | 292.18   | 146.59   |          |          |          |          | F   |          |          |          |          |          |          | 26    |
| 2  | 405.26   | 203.13   |          |          |          |          | I   | 3,079.51 | 1,540.26 | 3,062.49 | 1,531.75 | 3,061.50 | 1,531.26 | 25    |
| 3  | 492.29   | 246.65   |          |          | 474.28   | 237.65   | S   | 2,966.43 | 1,483.72 | 2,949.40 | 1,475.20 | 2,948.42 | 1,474.71 | 24    |
| 4  | 607.32   | 304.16   |          |          | 589.31   | 295.16   | D   | 2,879.40 | 1,440.20 | 2,862.37 | 1,431.69 | 2,861.39 | 1,431.20 | 23    |
| 5  | 879.52   | 440.26   | 862.49   | 431.75   | 861.51   | 431.26   | K   | 2,764.37 | 1,382.69 | 2,747.34 | 1,374.18 | 2,746.36 | 1,373.68 | 22    |
| 6  | 994.54   | 497.78   | 977.52   | 489.26   | 976.53   | 488.77   | D   | 2,492.17 | 1,246.59 | 2,475.15 | 1,238.08 | 2,474.16 | 1,237.59 | 21    |
| 7  | 1,065.58 | 533.29   | 1,048.56 | 524.78   | 1,047.57 | 524.29   | A   | 2,377.15 | 1,189.08 | 2,360.12 | 1,180.56 | 2,359.14 | 1,180.07 | 20    |
| 8  | 1,152.61 | 576.81   | 1,135.59 | 568.30   | 1,134.60 | 567.81   | S   | 2,306.11 | 1,153.56 | 2,289.08 | 1,145.05 | 2,288.10 | 1,144.55 | 19    |
| 9  | 1,265.70 | 633.35   | 1,248.67 | 624.84   | 1,247.69 | 624.35   | I   | 2,219.08 | 1,110.04 | 2,202.05 | 1,101.53 | 2,201.07 | 1,101.04 | 18    |
| 10 | 1,364.77 | 682.89   | 1,347.74 | 674.37   | 1,346.76 | 673.88   | V   | 2,105.99 | 1,053.50 | 2,088.97 | 1,044.99 | 2,087.98 | 1,044.50 | 17    |
| 11 | 1,421.79 | 711.40   | 1,404.76 | 702.88   | 1,403.78 | 702.39   | G   | 2,006.93 | 1,003.97 | 1,989.90 | 995.45   | 1,988.91 | 994.96   | 16    |
| 12 | 1,568.86 | 784.93   | 1,551.83 | 776.42   | 1,550.85 | 775.93   | F   | 1,949.90 | 975.46   | 1,932.88 | 966.94   | 1,931.89 | 966.45   | 15    |
| 13 | 1,715.92 | 858.47   | 1,698.90 | 849.95   | 1,697.91 | 849.46   | F   | 1,802.84 | 901.92   | 1,785.81 | 893.41   | 1,784.82 | 892.92   | 14    |
| 14 | 1,830.95 | 915.98   | 1,813.93 | 907.47   | 1,812.94 | 906.97   | D   | 1,655.77 | 828.39   | 1,638.74 | 819.87   | 1,637.76 | 819.38   | 13    |
| 15 | 1,945.98 | 973.49   | 1,928.95 | 964.98   | 1,927.97 | 964.49   | D   | 1,540.74 | 770.87   | 1,523.71 | 762.36   | 1,522.73 | 761.87   | 12    |
| 16 | 2,033.01 | 1,017.01 | 2,015.98 | 1,008.50 | 2,015.00 | 1,008.00 | S   | 1,425.71 | 713.36   | 1,408.69 | 704.85   | 1,407.70 | 704.35   | 11    |
| 17 | 2,180.08 | 1,090.54 | 2,163.05 | 1,082.03 | 2,162.07 | 1,081.54 | F   | 1,338.68 | 669.84   | 1,321.65 | 661.33   | 1,320.67 | 660.84   | 10    |
| 18 | 2,267.11 | 1,134.06 | 2,250.08 | 1,125.55 | 2,249.10 | 1,125.05 | S   | 1,191.61 | 596.31   | 1,174.59 | 587.80   | 1,173.60 | 587.30   | 9     |

|    |          |          |          |          |          |          |   |          |        |          |        |          |        |   |
|----|----------|----------|----------|----------|----------|----------|---|----------|--------|----------|--------|----------|--------|---|
| 19 | 2,396.15 | 1,198.58 | 2,379.13 | 1,190.07 | 2,378.14 | 1,189.58 | E | 1,104.58 | 552.79 | 1,087.55 | 544.28 | 1,086.57 | 543.79 | 8 |
| 20 | 2,467.19 | 1,234.10 | 2,450.16 | 1,225.59 | 2,449.18 | 1,225.09 | A | 975.54   | 488.27 | 958.51   | 479.76 | 957.53   | 479.27 | 7 |
| 21 | 2,604.25 | 1,302.63 | 2,587.22 | 1,294.11 | 2,586.24 | 1,293.62 | H | 904.50   | 452.75 | 887.47   | 444.24 | 886.49   | 443.75 | 6 |
| 22 | 2,691.28 | 1,346.14 | 2,674.25 | 1,337.63 | 2,673.27 | 1,337.14 | S | 767.44   | 384.22 | 750.42   | 375.71 | 749.43   | 375.22 | 5 |
| 23 | 2,820.32 | 1,410.67 | 2,803.30 | 1,402.15 | 2,802.31 | 1,401.66 | E | 680.41   | 340.71 | 663.38   | 332.20 | 662.40   | 331.70 | 4 |
| 24 | 2,967.39 | 1,484.20 | 2,950.37 | 1,475.69 | 2,949.38 | 1,475.19 | F | 551.37   | 276.19 | 534.34   | 267.67 |          |        | 3 |
| 25 | 3,080.48 | 1,540.74 | 3,063.45 | 1,532.23 | 3,062.47 | 1,531.74 | L | 404.30   | 202.65 | 387.27   | 194.14 |          |        | 2 |
| 26 |          |          |          |          |          |          | K | 291.21   | 146.11 | 274.19   | 137.60 |          |        | 1 |

Query 2549 Hit 1

MS/MS Fragmentation of **GLAFIQDPDGYWIELNPNK**

Found in **sp|Q04760|LGUL\_HUMAN**, Lactoylglutathione lyase OS=Homo sapiens GN=GLO1 PE=1 SV=4

Match to Query 2549: 2590.372from(864.4646,3+)

Title: 1105: Scan 2744 (rt=70.0872, f=3, i=397) [D:\lab212\membrane\Grace\20120214\_iTRAQ\_2.raw]

Data File:

**Monoisotopic mass of neutral peptide Mr(calc): 2590.372**

**Variable modifications:**

**K20** iTRAQ4plex (K)

**Ions Score: 61.62 Expect: 0.001**

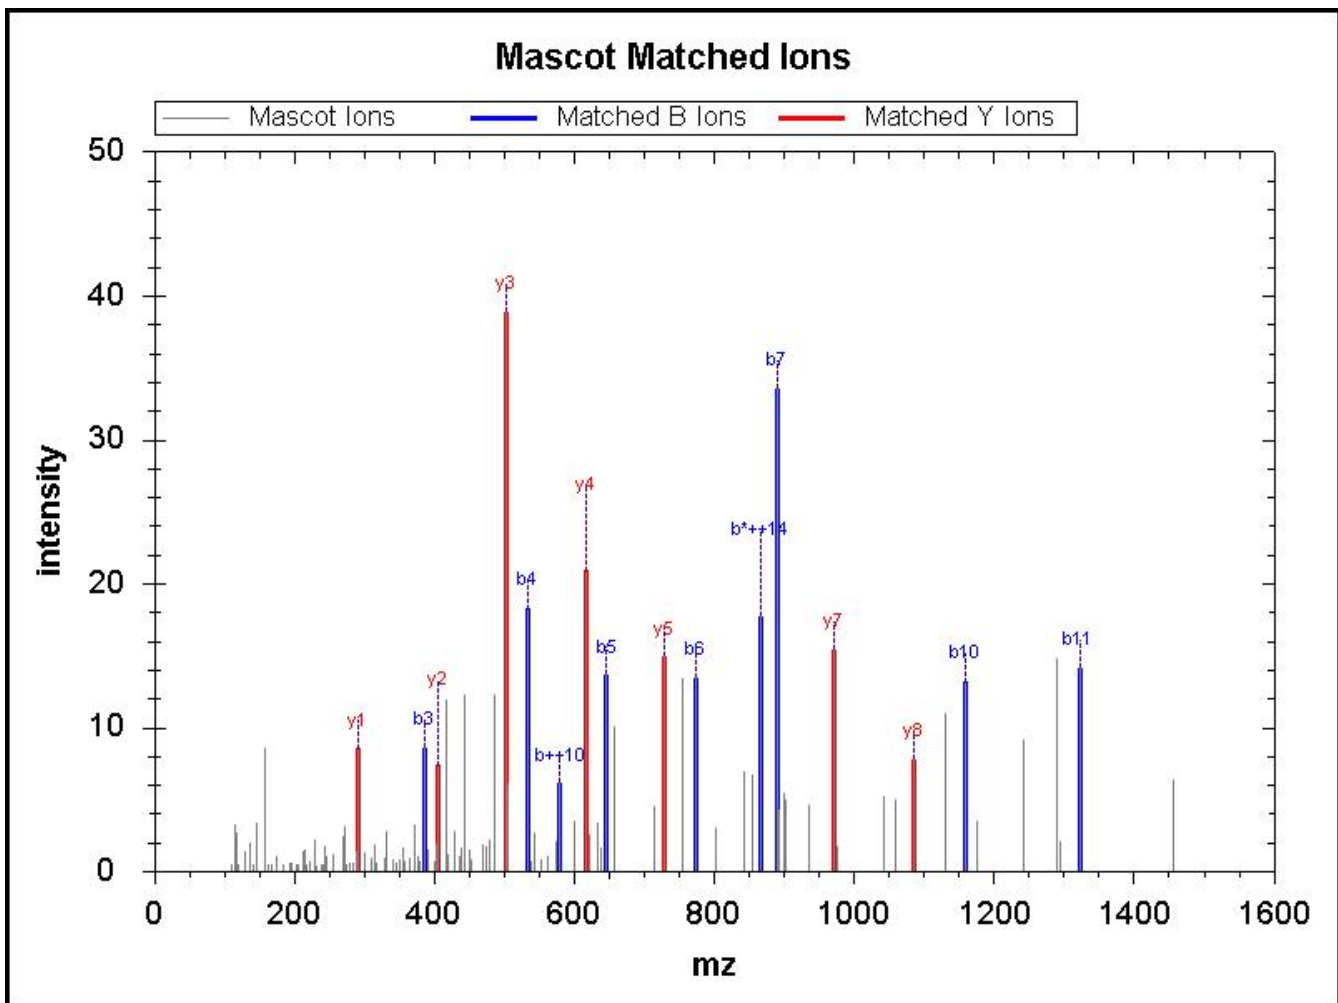

| No | b      | b++    | b*     | b*++   | b0 | b0++ | Seq | y        | y++      | y*       | y*++     | y0       | y0++     | RevNo |
|----|--------|--------|--------|--------|----|------|-----|----------|----------|----------|----------|----------|----------|-------|
| 1  | 202.13 | 101.57 |        |        |    |      | G   |          |          |          |          |          |          | 20    |
| 2  | 315.21 | 158.11 |        |        |    |      | L   | 2,390.25 | 1,195.63 | 2,373.22 | 1,187.12 | 2,372.24 | 1,186.62 | 19    |
| 3  | 386.25 | 193.63 |        |        |    |      | A   | 2,277.17 | 1,139.09 | 2,260.14 | 1,130.57 | 2,259.16 | 1,130.08 | 18    |
| 4  | 533.32 | 267.16 |        |        |    |      | F   | 2,206.13 | 1,103.57 | 2,189.10 | 1,095.06 | 2,188.12 | 1,094.56 | 17    |
| 5  | 646.40 | 323.71 |        |        |    |      | I   | 2,059.06 | 1,030.03 | 2,042.04 | 1,021.52 | 2,041.05 | 1,021.03 | 16    |
| 6  | 774.46 | 387.74 | 757.44 | 379.22 |    |      | Q   | 1,945.98 | 973.49   | 1,928.95 | 964.98   | 1,927.97 | 964.49   | 15    |

|    |          |          |          |          |          |          |   |          |        |          |        |          |        |    |
|----|----------|----------|----------|----------|----------|----------|---|----------|--------|----------|--------|----------|--------|----|
| 7  | 889.49   | 445.25   | 872.46   | 436.74   | 871.48   | 436.24   | D | 1,817.92 | 909.46 | 1,800.89 | 900.95 | 1,799.91 | 900.46 | 14 |
| 8  | 986.54   | 493.77   | 969.52   | 485.26   | 968.53   | 484.77   | P | 1,702.89 | 851.95 | 1,685.87 | 843.44 | 1,684.88 | 842.94 | 13 |
| 9  | 1,101.57 | 551.29   | 1,084.54 | 542.78   | 1,083.56 | 542.28   | D | 1,605.84 | 803.42 | 1,588.81 | 794.91 | 1,587.83 | 794.42 | 12 |
| 10 | 1,158.59 | 579.80   | 1,141.56 | 571.29   | 1,140.58 | 570.79   | G | 1,490.81 | 745.91 | 1,473.79 | 737.40 | 1,472.80 | 736.90 | 11 |
| 11 | 1,321.65 | 661.33   | 1,304.63 | 652.82   | 1,303.64 | 652.33   | Y | 1,433.79 | 717.40 | 1,416.76 | 708.89 | 1,415.78 | 708.39 | 10 |
| 12 | 1,507.73 | 754.37   | 1,490.71 | 745.86   | 1,489.72 | 745.37   | W | 1,270.73 | 635.87 | 1,253.70 | 627.35 | 1,252.72 | 626.86 | 9  |
| 13 | 1,620.82 | 810.91   | 1,603.79 | 802.40   | 1,602.81 | 801.91   | I | 1,084.65 | 542.83 | 1,067.62 | 534.31 | 1,066.64 | 533.82 | 8  |
| 14 | 1,749.86 | 875.43   | 1,732.83 | 866.92   | 1,731.85 | 866.43   | E | 971.56   | 486.29 | 954.54   | 477.77 | 953.55   | 477.28 | 7  |
| 15 | 1,862.94 | 931.98   | 1,845.92 | 923.46   | 1,844.93 | 922.97   | I | 842.52   | 421.76 | 825.49   | 413.25 |          |        | 6  |
| 16 | 1,976.03 | 988.52   | 1,959.00 | 980.00   | 1,958.02 | 979.51   | L | 729.44   | 365.22 | 712.41   | 356.71 |          |        | 5  |
| 17 | 2,090.07 | 1,045.54 | 2,073.05 | 1,037.03 | 2,072.06 | 1,036.53 | N | 616.35   | 308.68 | 599.33   | 300.17 |          |        | 4  |
| 18 | 2,187.12 | 1,094.07 | 2,170.10 | 1,085.55 | 2,169.11 | 1,085.06 | P | 502.31   | 251.66 | 485.28   | 243.15 |          |        | 3  |
| 19 | 2,301.17 | 1,151.09 | 2,284.14 | 1,142.57 | 2,283.16 | 1,142.08 | N | 405.26   | 203.13 | 388.23   | 194.62 |          |        | 2  |
| 20 |          |          |          |          |          |          | K | 291.21   | 146.11 | 274.19   | 137.60 |          |        | 1  |

Query 608 Hit 1

MS/MS Fragmentation of **VFQFLNAK**

Found in **sp|P83731|RL24\_HUMAN**, 60S ribosomal protein L24 OS=Homo sapiens GN=RPL24 PE=1 SV=1

Match to Query 608: 1253.735from(627.875,2+)

Title: 716: Scan 1932 (rt=51.7903, f=3, i=266) [D:\lab212\membrane\Grace\20120214\_iTRAQ\_2.raw]

Data File:

**Monoisotopic mass of neutral peptide Mr(calc):** 1253.735

**Variable modifications:**

**K8** iTRAQ4plex (K)

**Ions Score:** 62.57 **Expect:** 0.000

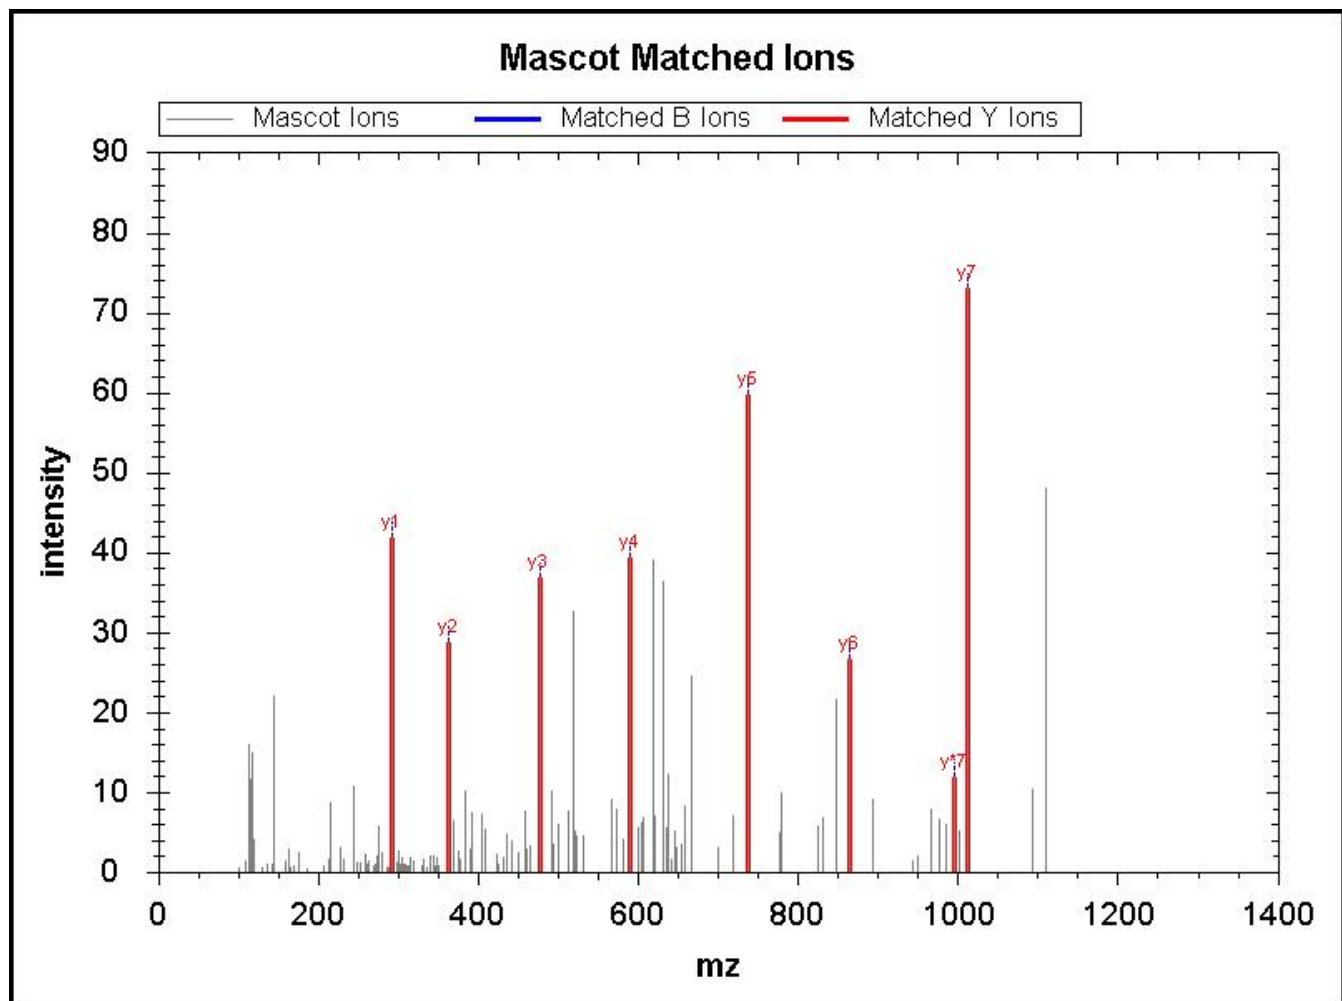

| No | b | b++ | b* | b*++ | Seq | y | y++ | y* | y*++ | RevNo |
|----|---|-----|----|------|-----|---|-----|----|------|-------|
|----|---|-----|----|------|-----|---|-----|----|------|-------|

|   |        |        |        |        |   |          |        |        |        |   |
|---|--------|--------|--------|--------|---|----------|--------|--------|--------|---|
| 1 | 244.18 | 122.59 |        |        | V |          |        |        |        | 8 |
| 2 | 391.25 | 196.13 |        |        | F | 1,011.57 | 506.29 | 994.55 | 497.78 | 7 |
| 3 | 519.30 | 260.16 | 502.28 | 251.64 | Q | 864.51   | 432.76 | 847.48 | 424.24 | 6 |
| 4 | 666.37 | 333.69 | 649.35 | 325.18 | F | 736.45   | 368.73 | 719.42 | 360.21 | 5 |
| 5 | 779.46 | 390.23 | 762.43 | 381.72 | L | 589.38   | 295.19 | 572.35 | 286.68 | 4 |
| 6 | 893.50 | 447.25 | 876.47 | 438.74 | N | 476.29   | 238.65 | 459.27 | 230.14 | 3 |
| 7 | 964.54 | 482.77 | 947.51 | 474.26 | A | 362.25   | 181.63 | 345.23 | 173.12 | 2 |
| 8 |        |        |        |        | K | 291.21   | 146.11 | 274.19 | 137.60 | 1 |

Query 2838 Hit 1

MS/MS Fragmentation of **VDNMIHQISILLDQLDKDINTFSMR**

Found in **sp|O00567|NOP56\_HUMAN**, Nucleolar protein 56 OS=Homo sapiens GN=NOP56 PE=1 SV=4

Match to Query 2838: 3196.672from(1066.564,3+)

Title: 1458: Scan 3671 (rt=90.6937, f=3, i=539) [D:\lab212\membrane\Grace\20120214\_iTRAQ\_1.raw]

Data File:

**Monoisotopic mass of neutral peptide Mr(calc): 3196.672**

**Variable modifications:**

**K17** iTRAQ4plex (K)

**Ions Score: 62.98 Expect: 0.000**

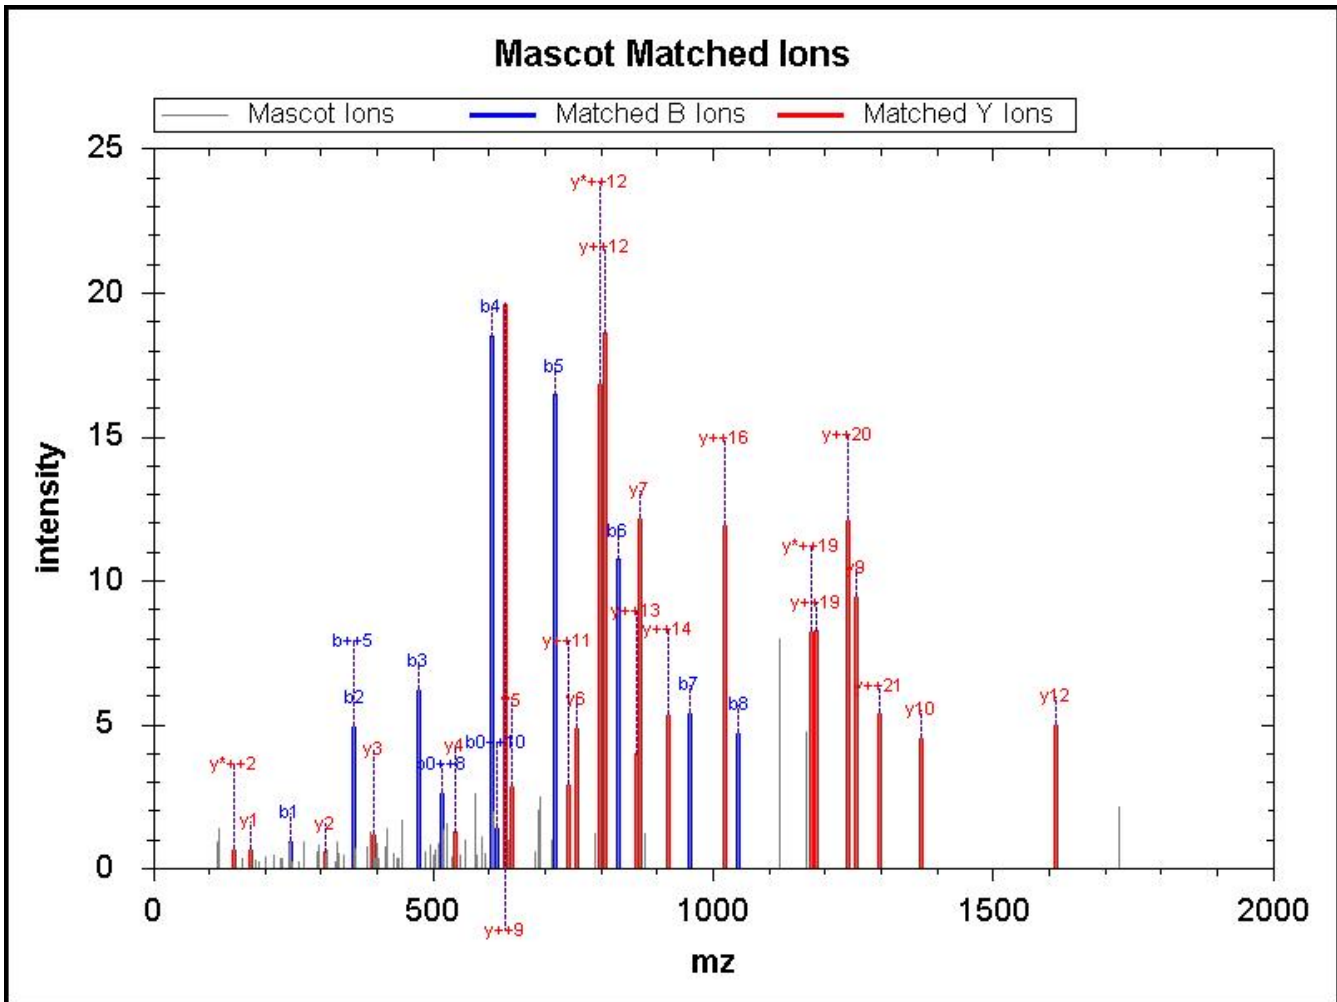

|    |          |          |          |          |          |          |   |          |          |          |          |          |          |    |
|----|----------|----------|----------|----------|----------|----------|---|----------|----------|----------|----------|----------|----------|----|
| 7  | 958.51   | 479.76   | 941.49   | 471.25   | 940.50   | 470.76   | Q | 2,368.23 | 1,184.62 | 2,351.20 | 1,176.11 | 2,350.22 | 1,175.61 | 19 |
| 8  | 1,045.55 | 523.28   | 1,028.52 | 514.76   | 1,027.54 | 514.27   | S | 2,240.17 | 1,120.59 | 2,223.14 | 1,112.08 | 2,222.16 | 1,111.58 | 18 |
| 9  | 1,158.63 | 579.82   | 1,141.60 | 571.31   | 1,140.62 | 570.81   | I | 2,153.14 | 1,077.07 | 2,136.11 | 1,068.56 | 2,135.13 | 1,068.07 | 17 |
| 10 | 1,245.66 | 623.34   | 1,228.64 | 614.82   | 1,227.65 | 614.33   | S | 2,040.06 | 1,020.53 | 2,023.03 | 1,012.02 | 2,022.04 | 1,011.53 | 16 |
| 11 | 1,358.75 | 679.88   | 1,341.72 | 671.36   | 1,340.74 | 670.87   | L | 1,953.02 | 977.02   | 1,936.00 | 968.50   | 1,935.01 | 968.01   | 15 |
| 12 | 1,471.83 | 736.42   | 1,454.80 | 727.91   | 1,453.82 | 727.41   | L | 1,839.94 | 920.47   | 1,822.91 | 911.96   | 1,821.93 | 911.47   | 14 |
| 13 | 1,586.86 | 793.93   | 1,569.83 | 785.42   | 1,568.85 | 784.93   | D | 1,726.86 | 863.93   | 1,709.83 | 855.42   | 1,708.84 | 854.93   | 13 |
| 14 | 1,714.92 | 857.96   | 1,697.89 | 849.45   | 1,696.91 | 848.96   | Q | 1,611.83 | 806.42   | 1,594.80 | 797.90   | 1,593.82 | 797.41   | 12 |
| 15 | 1,828.00 | 914.50   | 1,810.97 | 905.99   | 1,809.99 | 905.50   | L | 1,483.77 | 742.39   | 1,466.74 | 733.88   | 1,465.76 | 733.38   | 11 |
| 16 | 1,943.03 | 972.02   | 1,926.00 | 963.50   | 1,925.02 | 963.01   | D | 1,370.69 | 685.85   | 1,353.66 | 677.33   | 1,352.67 | 676.84   | 10 |
| 17 | 2,215.22 | 1,108.12 | 2,198.20 | 1,099.60 | 2,197.21 | 1,099.11 | K | 1,255.66 | 628.33   | 1,238.63 | 619.82   | 1,237.65 | 619.33   | 9  |
| 18 | 2,330.25 | 1,165.63 | 2,313.23 | 1,157.12 | 2,312.24 | 1,156.62 | D | 983.46   | 492.23   | 966.43   | 483.72   | 965.45   | 483.23   | 8  |
| 19 | 2,443.34 | 1,222.17 | 2,426.31 | 1,213.66 | 2,425.33 | 1,213.17 | I | 868.43   | 434.72   | 851.41   | 426.21   | 850.42   | 425.72   | 7  |
| 20 | 2,557.38 | 1,279.19 | 2,540.35 | 1,270.68 | 2,539.37 | 1,270.19 | N | 755.35   | 378.18   | 738.32   | 369.67   | 737.34   | 369.17   | 6  |
| 21 | 2,658.43 | 1,329.72 | 2,641.40 | 1,321.20 | 2,640.42 | 1,320.71 | T | 641.31   | 321.16   | 624.28   | 312.64   | 623.30   | 312.15   | 5  |
| 22 | 2,805.49 | 1,403.25 | 2,788.47 | 1,394.74 | 2,787.48 | 1,394.25 | F | 540.26   | 270.63   | 523.23   | 262.12   | 522.25   | 261.63   | 4  |
| 23 | 2,892.53 | 1,446.77 | 2,875.50 | 1,438.25 | 2,874.52 | 1,437.76 | S | 393.19   | 197.10   | 376.16   | 188.59   | 375.18   | 188.09   | 3  |
| 24 | 3,023.57 | 1,512.29 | 3,006.54 | 1,503.77 | 3,005.56 | 1,503.28 | M | 306.16   | 153.58   | 289.13   | 145.07   |          |          | 2  |
| 25 |          |          |          |          |          |          | R | 175.12   | 88.06    | 158.09   | 79.55    |          |          | 1  |

Query 2133 Hit 1

MS/MS Fragmentation of **RPFGISALIVGFDFDGTPR**

Found in **sp|O14818|PSA7\_HUMAN**, Proteasome subunit alpha type-7 OS=Homo sapiens GN=PSMA7 PE=1 SV=1

Match to Query 2133: 2208.18from(737.0673,3+)

Title: 1041: Scan 2613 (rt=67.132, f=2, i=411) [D:\lab212\membrane\Grace\20120214\_iTRAQ\_2.raw]

Data File:

**Monoisotopic mass of neutral peptide Mr(calc): 2208.18**

**Variable modifications:**

**Ions Score: 63.81 Expect: 0.000**



Title: 740: Sum of 2 scans in range 2026 (rt=53.8267, f=4, i=506) to 2027 (rt=53.8521, f=4, i=507)

[D:\lab212\membrane\Grace\20120214\_iTRAQ\_1.raw]

Data File:

**Monoisotopic mass of neutral peptide Mr(calc): 1555.953**

**Variable modifications:**

**K12 iTRAQ4plex (K)**

**Ions Score: 64.09 Expect: 0.000**

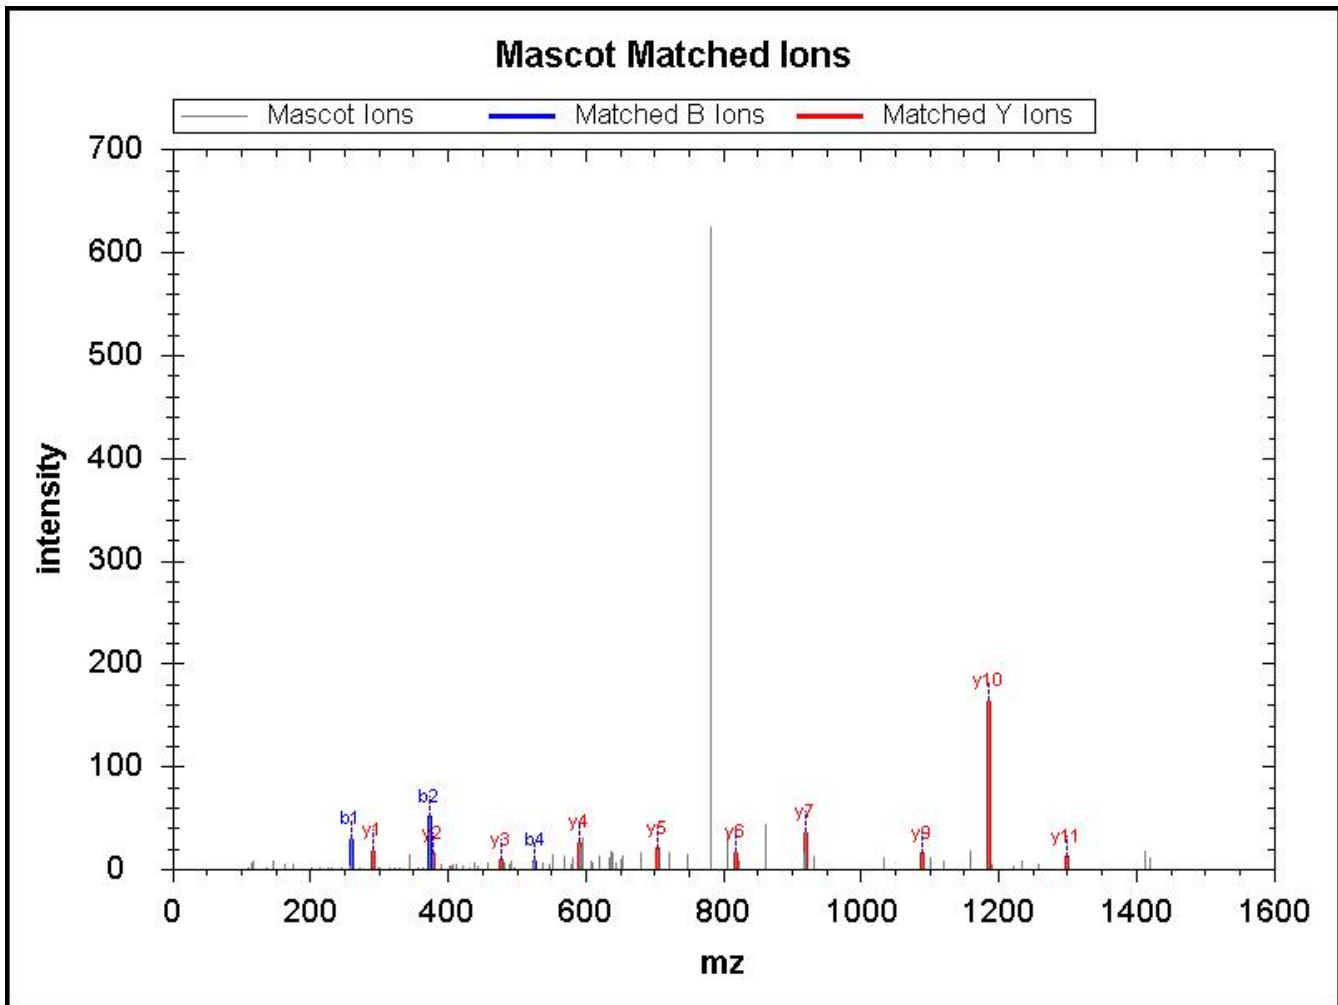

| No | b        | b++    | b*       | b*++   | b0       | b0++   | Seq | y        | y++    | y*       | y*++   | y0       | y0++   | RevNo |
|----|----------|--------|----------|--------|----------|--------|-----|----------|--------|----------|--------|----------|--------|-------|
| 1  | 259.15   | 130.08 | 242.13   | 121.57 |          |        | N   |          |        |          |        |          |        | 12    |
| 2  | 372.24   | 186.62 | 355.21   | 178.11 |          |        | I   | 1,298.82 | 649.91 | 1,281.79 | 641.40 | 1,280.81 | 640.91 | 11    |
| 3  | 469.29   | 235.15 | 452.26   | 226.63 |          |        | P   | 1,185.73 | 593.37 | 1,168.71 | 584.86 | 1,167.72 | 584.36 | 10    |
| 4  | 526.31   | 263.66 | 509.28   | 255.15 |          |        | G   | 1,088.68 | 544.84 | 1,071.65 | 536.33 | 1,070.67 | 535.84 | 9     |
| 5  | 639.39   | 320.20 | 622.37   | 311.69 |          |        | I   | 1,031.66 | 516.33 | 1,014.63 | 507.82 | 1,013.65 | 507.33 | 8     |
| 6  | 740.44   | 370.72 | 723.42   | 362.21 | 722.43   | 361.72 | T   | 918.57   | 459.79 | 901.55   | 451.28 | 900.56   | 450.79 | 7     |
| 7  | 853.53   | 427.27 | 836.50   | 418.75 | 835.52   | 418.26 | L   | 817.53   | 409.27 | 800.50   | 400.75 | 799.52   | 400.26 | 6     |
| 8  | 966.61   | 483.81 | 949.58   | 475.30 | 948.60   | 474.80 | L   | 704.44   | 352.72 | 687.42   | 344.21 | 686.43   | 343.72 | 5     |
| 9  | 1,080.65 | 540.83 | 1,063.63 | 532.32 | 1,062.64 | 531.83 | N   | 591.36   | 296.18 | 574.33   | 287.67 | 573.35   | 287.18 | 4     |
| 10 | 1,179.72 | 590.36 | 1,162.70 | 581.85 | 1,161.71 | 581.36 | V   | 477.32   | 239.16 | 460.29   | 230.65 | 459.30   | 230.16 | 3     |
| 11 | 1,266.75 | 633.88 | 1,249.73 | 625.37 | 1,248.74 | 624.88 | S   | 378.25   | 189.63 | 361.22   | 181.11 | 360.24   | 180.62 | 2     |
| 12 |          |        |          |        |          |        | K   | 291.21   | 146.11 | 274.19   | 137.60 |          |        | 1     |

Query 1878 Hit 1

MS/MS Fragmentation of **KIEEIKDFLLTAR**

Found in **sp|P63173|RL38\_HUMAN**, 60S ribosomal protein L38 OS=Homo sapiens GN=RPL38 PE=1 SV=2

Match to Query 1878: 2007.206 from (670.076, 3+)

Title: 810: Scan 2129 (rt=56.2275, f=2, i=333) [D:\lab212\membrane\Grace\20120214\_iTRAQ\_2.raw]

Data File:





Monoisotopic mass of neutral peptide Mr(calc): 1457.821

Variable modifications:

Ions Score: 65.89 Expect: 0.000

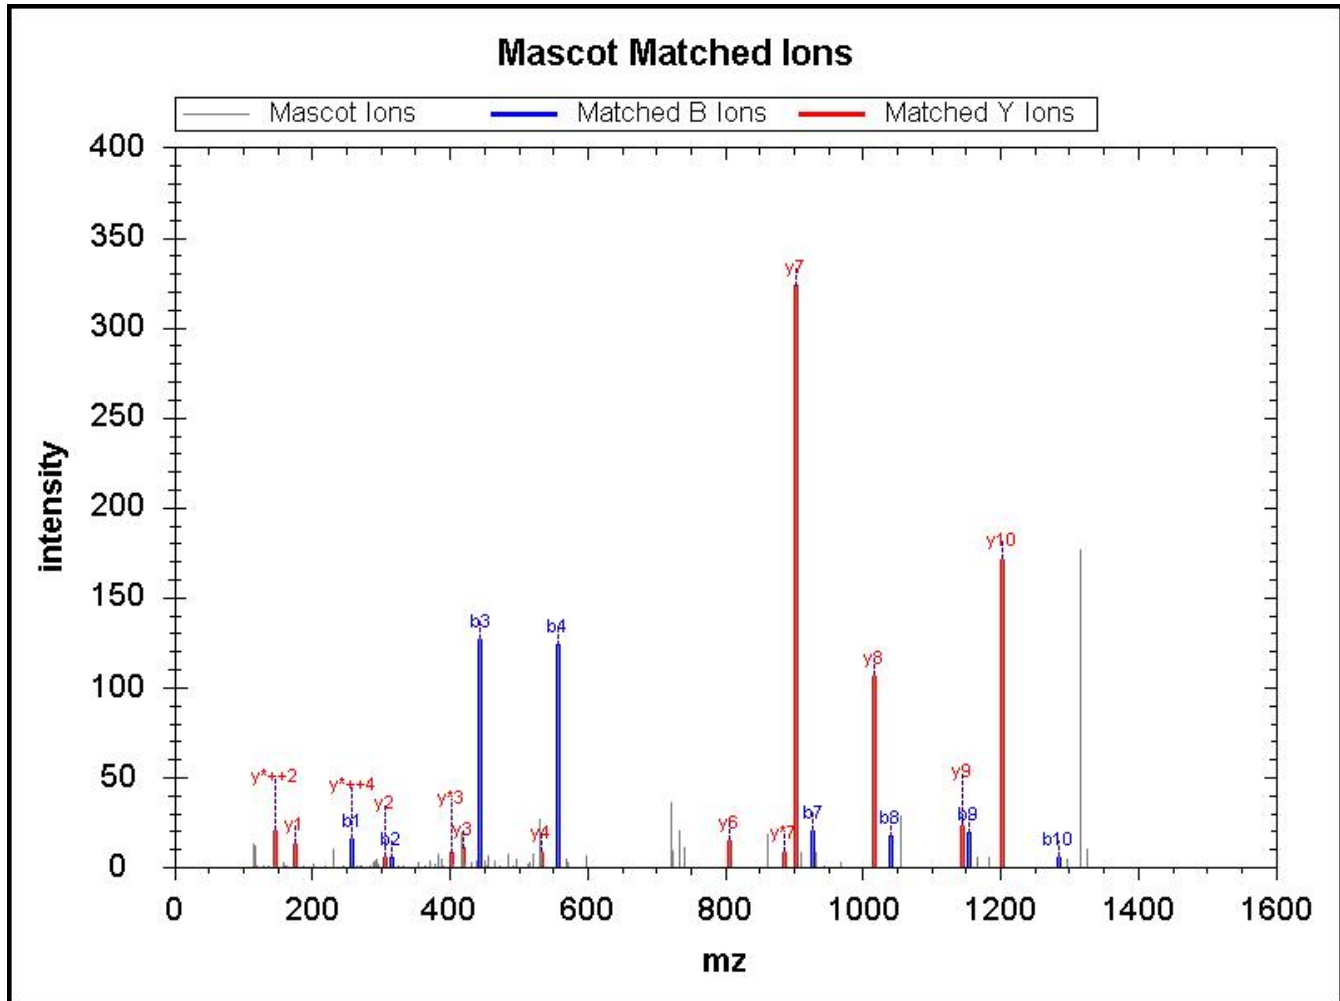

| No | b        | b++    | b0       | b0++   | Seq | y        | y++    | y*       | y*++   | y0       | y0++   | RevNo |
|----|----------|--------|----------|--------|-----|----------|--------|----------|--------|----------|--------|-------|
| 1  | 258.19   | 129.60 |          |        | L   |          |        |          |        |          |        | 11    |
| 2  | 315.21   | 158.11 |          |        | G   | 1,201.64 | 601.32 | 1,184.61 | 592.81 | 1,183.63 | 592.32 | 10    |
| 3  | 444.26   | 222.63 | 426.25   | 213.63 | E   | 1,144.62 | 572.81 | 1,127.59 | 564.30 | 1,126.61 | 563.81 | 9     |
| 4  | 557.34   | 279.17 | 539.33   | 270.17 | L   | 1,015.58 | 508.29 | 998.55   | 499.78 | 997.57   | 499.29 | 8     |
| 5  | 654.39   | 327.70 | 636.38   | 318.70 | P   | 902.49   | 451.75 | 885.47   | 443.24 | 884.48   | 442.74 | 7     |
| 6  | 741.43   | 371.22 | 723.42   | 362.21 | S   | 805.44   | 403.22 | 788.41   | 394.71 | 787.43   | 394.22 | 6     |
| 7  | 927.51   | 464.26 | 909.49   | 455.25 | W   | 718.41   | 359.71 | 701.38   | 351.19 |          |        | 5     |
| 8  | 1,040.59 | 520.80 | 1,022.58 | 511.79 | I   | 532.33   | 266.67 | 515.30   | 258.15 |          |        | 4     |
| 9  | 1,153.67 | 577.34 | 1,135.66 | 568.34 | L   | 419.24   | 210.13 | 402.22   | 201.61 |          |        | 3     |
| 10 | 1,284.71 | 642.86 | 1,266.70 | 633.86 | M   | 306.16   | 153.58 | 289.13   | 145.07 |          |        | 2     |
| 11 |          |        |          |        | R   | 175.12   | 88.06  | 158.09   | 79.55  |          |        | 1     |

Query 2882 Hit 1

MS/MS Fragmentation of **IMPLEDMNEFTTHILEVINAHMVLSK**

Found in **sp|P15927|RAFA2\_HUMAN**, Replication protein A 32 kDa subunit OS=Homo sapiens GN=RPA2 PE=1 SV=1

Match to Query 2882: 3312.71 from (829.1848, 4+)

Title: 1372: Scan 3377 (rt=84.265, f=3, i=486) [D:\lab212\membrane\Grace\20120214\_iTRAQ\_1.raw]

Data File:

Monoisotopic mass of neutral peptide Mr(calc): 3312.71

Variable modifications:

K26 iTRAQ4plex (K)

Ions Score: 66.08 Expect: 0.000

### Mascot Matched Ions

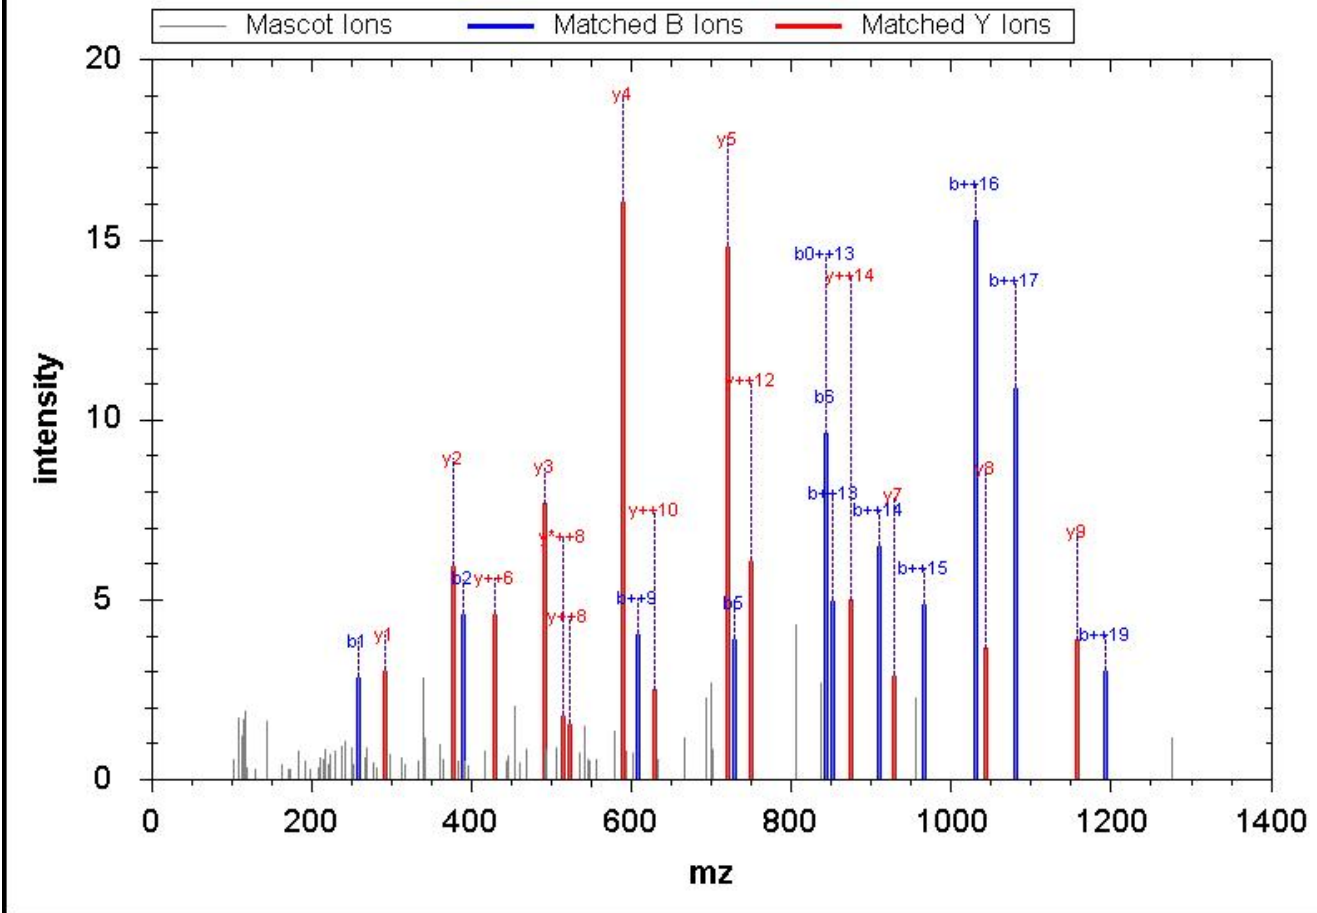

| No | b        | b++      | b*       | b***     | b0       | b0++     | Seq | y        | y++      | y*       | y***     | y0       | y0++     | RevNo |
|----|----------|----------|----------|----------|----------|----------|-----|----------|----------|----------|----------|----------|----------|-------|
| 1  | 258.19   | 129.60   |          |          |          |          | I   |          |          |          |          |          |          | 26    |
| 2  | 389.23   | 195.12   |          |          |          |          | M   | 3,056.54 | 1,528.77 | 3,039.51 | 1,520.26 | 3,038.53 | 1,519.77 | 25    |
| 3  | 486.29   | 243.65   |          |          |          |          | P   | 2,925.50 | 1,463.25 | 2,908.47 | 1,454.74 | 2,907.49 | 1,454.25 | 24    |
| 4  | 599.37   | 300.19   |          |          |          |          | L   | 2,828.44 | 1,414.73 | 2,811.42 | 1,406.21 | 2,810.43 | 1,405.72 | 23    |
| 5  | 728.41   | 364.71   |          |          | 710.40   | 355.71   | E   | 2,715.36 | 1,358.18 | 2,698.33 | 1,349.67 | 2,697.35 | 1,349.18 | 22    |
| 6  | 843.44   | 422.22   |          |          | 825.43   | 413.22   | D   | 2,586.32 | 1,293.66 | 2,569.29 | 1,285.15 | 2,568.31 | 1,284.66 | 21    |
| 7  | 974.48   | 487.74   |          |          | 956.47   | 478.74   | M   | 2,471.29 | 1,236.15 | 2,454.26 | 1,227.64 | 2,453.28 | 1,227.14 | 20    |
| 8  | 1,088.52 | 544.77   | 1,071.50 | 536.25   | 1,070.51 | 535.76   | N   | 2,340.25 | 1,170.63 | 2,323.22 | 1,162.12 | 2,322.24 | 1,161.62 | 19    |
| 9  | 1,217.57 | 609.29   | 1,200.54 | 600.77   | 1,199.56 | 600.28   | E   | 2,226.21 | 1,113.61 | 2,209.18 | 1,105.09 | 2,208.20 | 1,104.60 | 18    |
| 10 | 1,364.63 | 682.82   | 1,347.61 | 674.31   | 1,346.62 | 673.82   | F   | 2,097.16 | 1,049.09 | 2,080.14 | 1,040.57 | 2,079.15 | 1,040.08 | 17    |
| 11 | 1,465.68 | 733.34   | 1,448.66 | 724.83   | 1,447.67 | 724.34   | T   | 1,950.10 | 975.55   | 1,933.07 | 967.04   | 1,932.09 | 966.55   | 16    |
| 12 | 1,566.73 | 783.87   | 1,549.70 | 775.36   | 1,548.72 | 774.86   | T   | 1,849.05 | 925.03   | 1,832.02 | 916.51   | 1,831.04 | 916.02   | 15    |
| 13 | 1,703.79 | 852.40   | 1,686.76 | 843.89   | 1,685.78 | 843.39   | H   | 1,748.00 | 874.50   | 1,730.97 | 865.99   | 1,729.99 | 865.50   | 14    |
| 14 | 1,816.87 | 908.94   | 1,799.85 | 900.43   | 1,798.86 | 899.93   | I   | 1,610.94 | 805.97   | 1,593.92 | 797.46   | 1,592.93 | 796.97   | 13    |
| 15 | 1,929.96 | 965.48   | 1,912.93 | 956.97   | 1,911.95 | 956.48   | L   | 1,497.86 | 749.43   | 1,480.83 | 740.92   | 1,479.85 | 740.43   | 12    |
| 16 | 2,059.00 | 1,030.00 | 2,041.97 | 1,021.49 | 2,040.99 | 1,021.00 | E   | 1,384.77 | 692.89   | 1,367.75 | 684.38   | 1,366.76 | 683.89   | 11    |
| 17 | 2,158.07 | 1,079.54 | 2,141.04 | 1,071.02 | 2,140.06 | 1,070.53 | V   | 1,255.73 | 628.37   | 1,238.70 | 619.86   | 1,237.72 | 619.36   | 10    |
| 18 | 2,271.15 | 1,136.08 | 2,254.13 | 1,127.57 | 2,253.14 | 1,127.07 | I   | 1,156.66 | 578.84   | 1,139.64 | 570.32   | 1,138.65 | 569.83   | 9     |
| 19 | 2,385.20 | 1,193.10 | 2,368.17 | 1,184.59 | 2,367.18 | 1,184.10 | N   | 1,043.58 | 522.29   | 1,026.55 | 513.78   | 1,025.57 | 513.29   | 8     |
| 20 | 2,456.23 | 1,228.62 | 2,439.21 | 1,220.11 | 2,438.22 | 1,219.61 | A   | 929.54   | 465.27   | 912.51   | 456.76   | 911.53   | 456.27   | 7     |
| 21 | 2,593.29 | 1,297.15 | 2,576.26 | 1,288.64 | 2,575.28 | 1,288.14 | H   | 858.50   | 429.75   | 841.47   | 421.24   | 840.49   | 420.75   | 6     |
| 22 | 2,724.33 | 1,362.67 | 2,707.31 | 1,354.16 | 2,706.32 | 1,353.66 | M   | 721.44   | 361.22   | 704.41   | 352.71   | 703.43   | 352.22   | 5     |
| 23 | 2,823.40 | 1,412.20 | 2,806.37 | 1,403.69 | 2,805.39 | 1,403.20 | V   | 590.40   | 295.70   | 573.37   | 287.19   | 572.39   | 286.70   | 4     |
| 24 | 2,936.48 | 1,468.75 | 2,919.46 | 1,460.23 | 2,918.47 | 1,459.74 | L   | 491.33   | 246.17   | 474.30   | 237.66   | 473.32   | 237.16   | 3     |

|    |          |          |          |          |          |          |   |        |        |        |        |        |        |   |
|----|----------|----------|----------|----------|----------|----------|---|--------|--------|--------|--------|--------|--------|---|
| 25 | 3,023.52 | 1,512.26 | 3,006.49 | 1,503.75 | 3,005.51 | 1,503.26 | S | 378.25 | 189.63 | 361.22 | 181.11 | 360.24 | 180.62 | 2 |
| 26 |          |          |          |          |          |          | K | 291.21 | 146.11 | 274.19 | 137.60 |        |        | 1 |

Query 999 Hit 1

MS/MS Fragmentation of **AAVESLGFILFR**

Found in **sp|Q99460|PSMD1\_HUMAN**, 26S proteasome non-ATPase regulatory subunit 1 OS=Homo sapiens GN=PSMD1 PE=1 SV=2

Match to Query 999: 1465.844from(733.9293,2+)

Title: 1052: Scan 2675 (rt=68.4448, f=2, i=421) [D:\lab212\membrane\Grace\20120214\_iTRAQ\_1.raw]

Data File:

**Monoisotopic mass of neutral peptide Mr(calc): 1465.844**

**Variable modifications:**

**Ions Score: 66.24 Expect: 0.000**

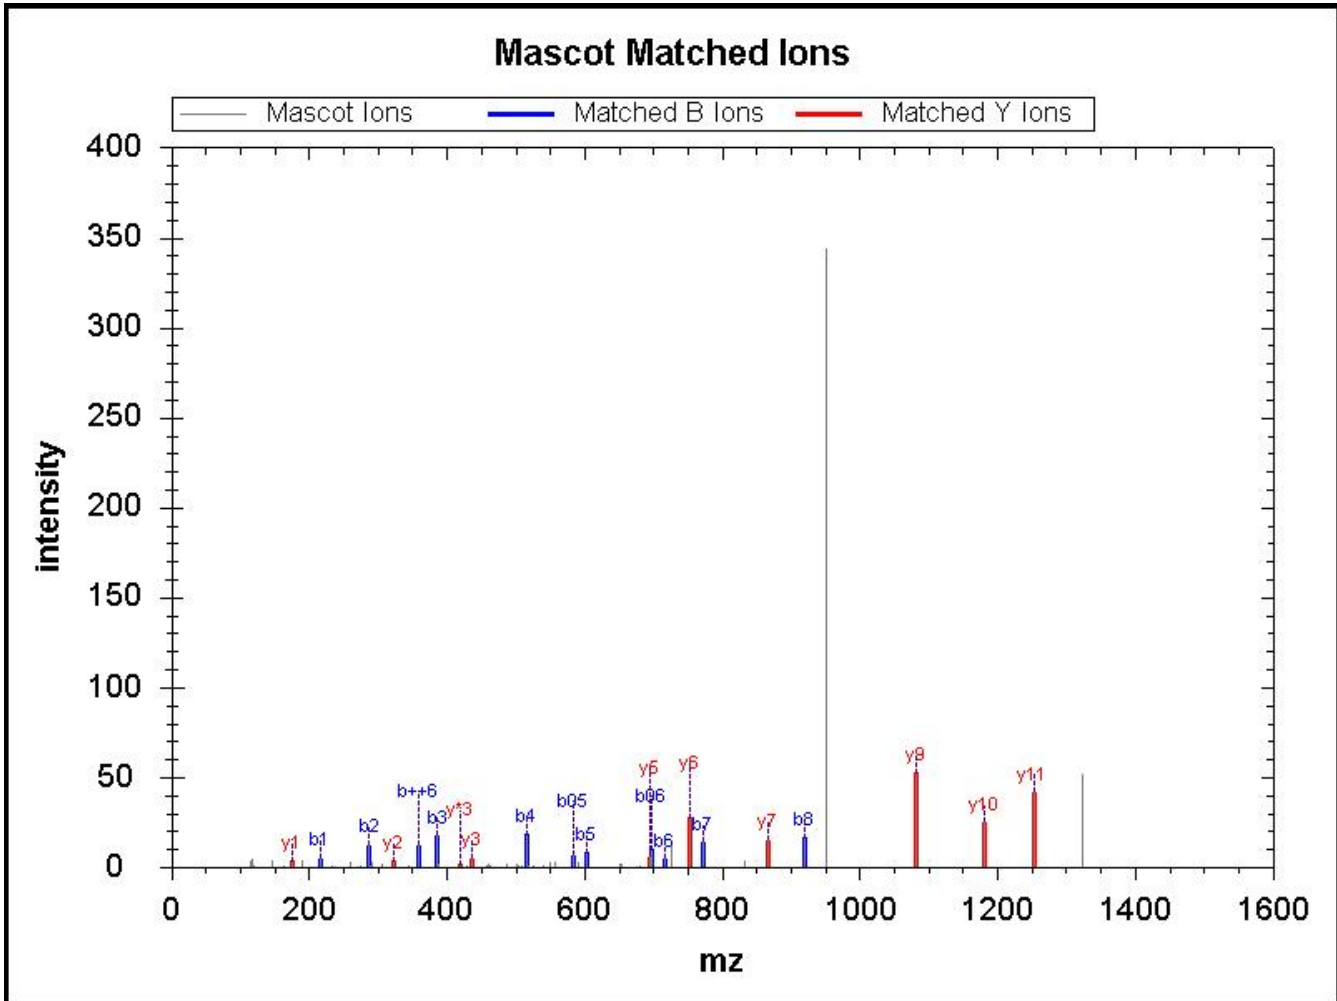

| No | b        | b++    | b0       | b0++   | Seq | y        | y++    | y*       | y*++   | y0       | y0++   | RevNo |
|----|----------|--------|----------|--------|-----|----------|--------|----------|--------|----------|--------|-------|
| 1  | 216.15   | 108.58 |          |        | A   |          |        |          |        |          |        | 12    |
| 2  | 287.18   | 144.10 |          |        | A   | 1,251.71 | 626.36 | 1,234.68 | 617.85 | 1,233.70 | 617.35 | 11    |
| 3  | 386.25   | 193.63 |          |        | V   | 1,180.67 | 590.84 | 1,163.65 | 582.33 | 1,162.66 | 581.83 | 10    |
| 4  | 515.29   | 258.15 | 497.28   | 249.15 | E   | 1,081.60 | 541.31 | 1,064.58 | 532.79 | 1,063.59 | 532.30 | 9     |
| 5  | 602.33   | 301.67 | 584.32   | 292.66 | S   | 952.56   | 476.78 | 935.53   | 468.27 | 934.55   | 467.78 | 8     |
| 6  | 715.41   | 358.21 | 697.40   | 349.20 | L   | 865.53   | 433.27 | 848.50   | 424.76 |          |        | 7     |
| 7  | 772.43   | 386.72 | 754.42   | 377.71 | G   | 752.45   | 376.73 | 735.42   | 368.21 |          |        | 6     |
| 8  | 919.50   | 460.25 | 901.49   | 451.25 | F   | 695.42   | 348.22 | 678.40   | 339.70 |          |        | 5     |
| 9  | 1,032.58 | 516.80 | 1,014.57 | 507.79 | I   | 548.36   | 274.68 | 531.33   | 266.17 |          |        | 4     |
| 10 | 1,145.67 | 573.34 | 1,127.66 | 564.33 | L   | 435.27   | 218.14 | 418.24   | 209.63 |          |        | 3     |
| 11 | 1,292.74 | 646.87 | 1,274.73 | 637.87 | F   | 322.19   | 161.60 | 305.16   | 153.08 |          |        | 2     |
| 12 |          |        |          |        | R   | 175.12   | 88.06  | 158.09   | 79.55  |          |        | 1     |

Query 2326 Hit 1

MS/MS Fragmentation of **AQMALWTVLAAPLLMSTDLR**

Found in **sp|P17050|NAGAB\_HUMAN**, Alpha-N-acetylgalactosaminidase OS=Homo sapiens GN=NAGA PE=1 SV=2

Match to Query 2326: 2344.27 from (782.4304,3+)

Title: 1422: Scan 3519 (rt=87.4273, f=2, i=565) [D:\lab212\membrane\Grace\20120214\_iTRAQ\_1.raw]

Data File:

**Monoisotopic mass of neutral peptide Mr(calc): 2344.27**

**Variable modifications:**

**Ions Score: 66.34 Expect: 0.000**

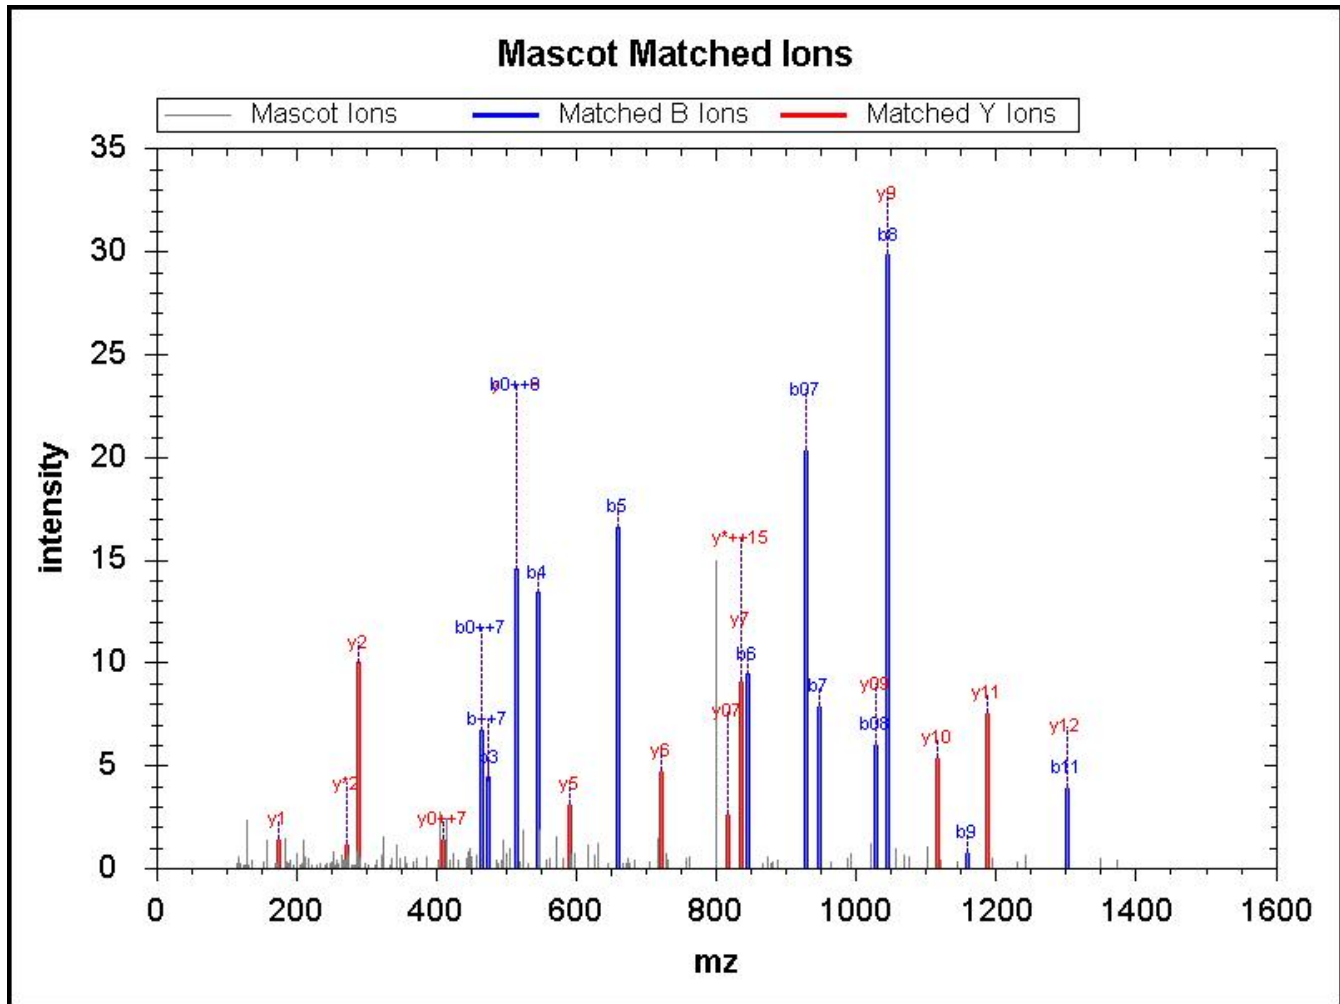

|    |          |          |          |          |          |          |   |        |        |        |        |        |        |   |
|----|----------|----------|----------|----------|----------|----------|---|--------|--------|--------|--------|--------|--------|---|
| 16 | 1,842.01 | 921.51   | 1,824.99 | 913.00   | 1,824.00 | 912.51   | S | 591.31 | 296.16 | 574.28 | 287.65 | 573.30 | 287.15 | 5 |
| 17 | 1,943.06 | 972.03   | 1,926.04 | 963.52   | 1,925.05 | 963.03   | T | 504.28 | 252.64 | 487.25 | 244.13 | 486.27 | 243.64 | 4 |
| 18 | 2,058.09 | 1,029.55 | 2,041.06 | 1,021.03 | 2,040.08 | 1,020.54 | D | 403.23 | 202.12 | 386.20 | 193.61 | 385.22 | 193.11 | 3 |
| 19 | 2,171.17 | 1,086.09 | 2,154.15 | 1,077.58 | 2,153.16 | 1,077.08 | L | 288.20 | 144.61 | 271.18 | 136.09 |        |        | 2 |
| 20 |          |          |          |          |          |          | R | 175.12 | 88.06  | 158.09 | 79.55  |        |        | 1 |

Query 1050 Hit 1

MS/MS Fragmentation of **DLLSWMESIIR**

Found in **sp|P11277|SPTB1\_HUMAN**, Spectrin beta chain

Match to Query 1050: 1505.799 from (753.907, 2+)

Title: 1396: Sum of 2 scans in range 3384 (rt=84.5013, f=4, i=935) to 3385 (rt=84.5267, f=4, i=936)

[D:\lab212\membrane\Grace\20120214\_iTRAQ\_2.raw]

Data File:

**Monoisotopic mass of neutral peptide Mr(calc): 1505.799**

**Variable modifications:**

**Ions Score: 66.49 Expect: 0.000**

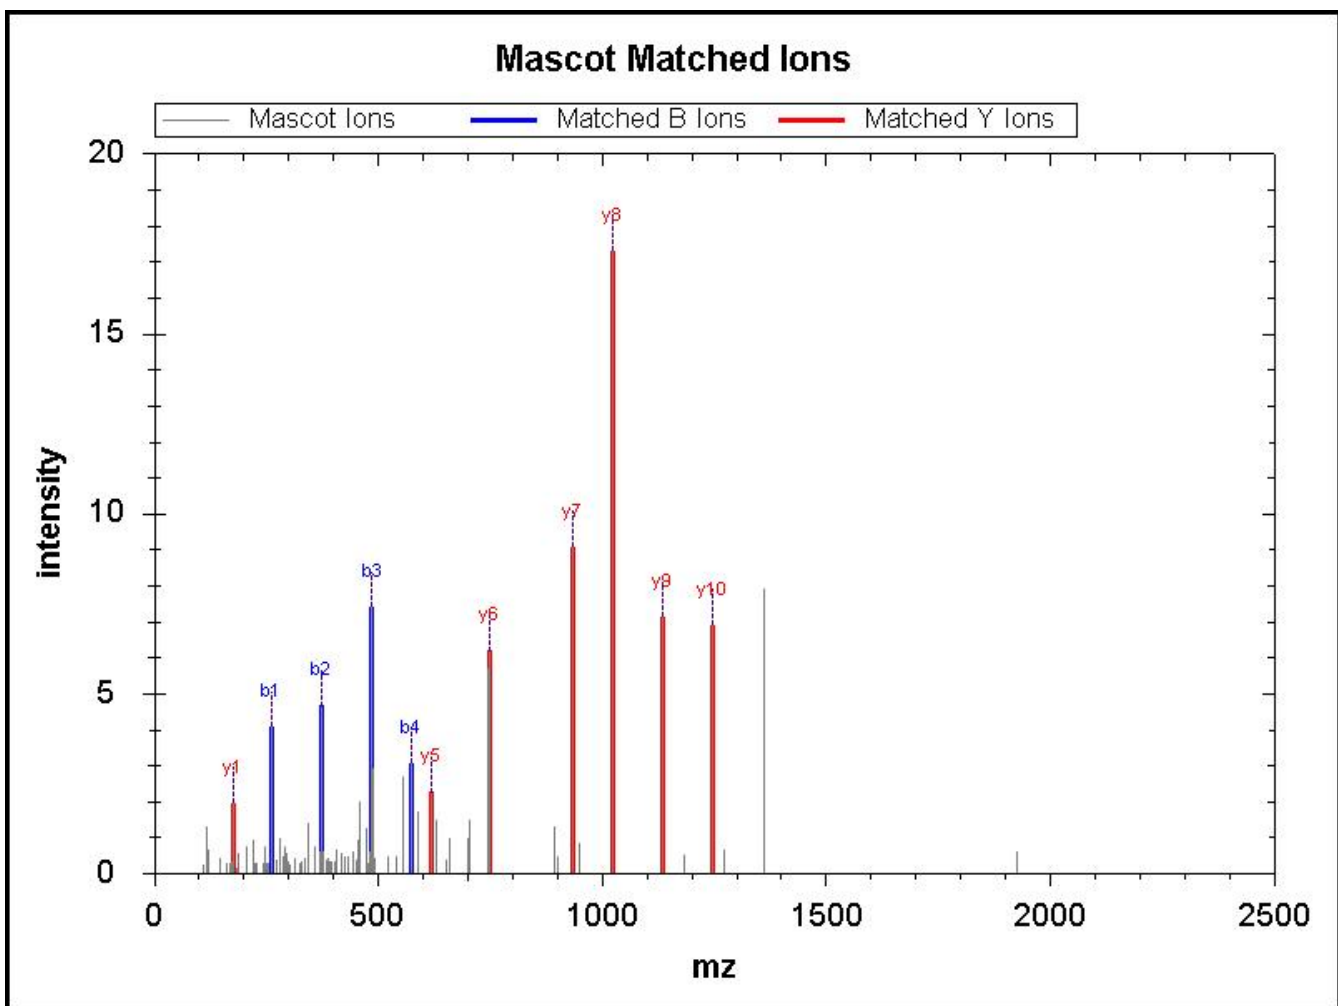

| No | b        | b++    | b0       | b0++   | Seq | y        | y++    | y*       | y*++   | y0       | y0++   | RevNo |
|----|----------|--------|----------|--------|-----|----------|--------|----------|--------|----------|--------|-------|
| 1  | 260.14   | 130.57 | 242.13   | 121.57 | D   |          |        |          |        |          |        | 11    |
| 2  | 373.22   | 187.11 | 355.21   | 178.11 | L   | 1,247.68 | 624.34 | 1,230.66 | 615.83 | 1,229.67 | 615.34 | 10    |
| 3  | 486.30   | 243.66 | 468.29   | 234.65 | L   | 1,134.60 | 567.80 | 1,117.57 | 559.29 | 1,116.59 | 558.80 | 9     |
| 4  | 573.34   | 287.17 | 555.33   | 278.17 | S   | 1,021.51 | 511.26 | 1,004.49 | 502.75 | 1,003.50 | 502.26 | 8     |
| 5  | 759.42   | 380.21 | 741.41   | 371.21 | W   | 934.48   | 467.74 | 917.45   | 459.23 | 916.47   | 458.74 | 7     |
| 6  | 890.46   | 445.73 | 872.45   | 436.73 | M   | 748.40   | 374.70 | 731.38   | 366.19 | 730.39   | 365.70 | 6     |
| 7  | 1,019.50 | 510.25 | 1,001.49 | 501.25 | E   | 617.36   | 309.18 | 600.34   | 300.67 | 599.35   | 300.18 | 5     |
| 8  | 1,106.53 | 553.77 | 1,088.52 | 544.76 | S   | 488.32   | 244.66 | 471.29   | 236.15 | 470.31   | 235.66 | 4     |

|    |          |        |          |        |   |        |        |        |        |  |  |   |
|----|----------|--------|----------|--------|---|--------|--------|--------|--------|--|--|---|
| 9  | 1,219.61 | 610.31 | 1,201.60 | 601.31 | I | 401.29 | 201.15 | 384.26 | 192.63 |  |  | 3 |
| 10 | 1,332.70 | 666.85 | 1,314.69 | 657.85 | I | 288.20 | 144.61 | 271.18 | 136.09 |  |  | 2 |
| 11 |          |        |          |        | R | 175.12 | 88.06  | 158.09 | 79.55  |  |  | 1 |

Query 2222 Hit 1

MS/MS Fragmentation of **VPSTEAEALASSLMGLFEK**

Found in **sp|P50395|GDIB\_HUMAN**, Rab GDP dissociation inhibitor beta OS=Homo sapiens GN=GD12 PE=1 SV=2

Match to Query 2222: 2267.195 from (756.739, 3+)

Title: 1282: Scan 3171 (rt=79.6213, f=2, i=501) [D:\lab212\membrane\Grace\20120214\_iTRAQ\_1.raw]

Data File:

**Monoisotopic mass of neutral peptide Mr(calc): 2267.195**

**Variable modifications:**

**K19** iTRAQ4plex (K)

**Ions Score: 66.55 Expect: 0.000**

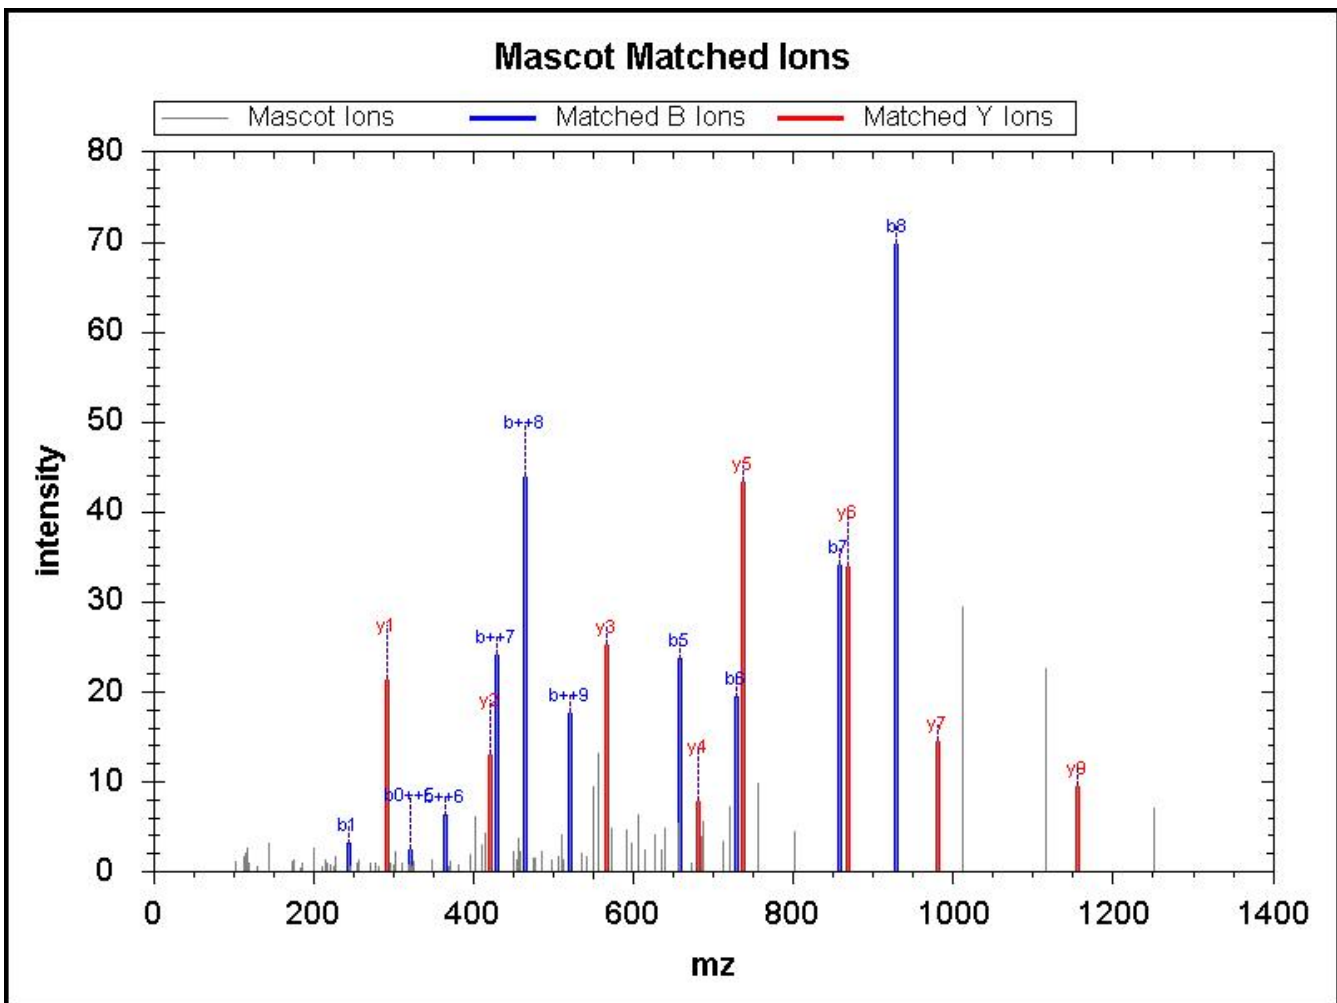

| No | b        | b++    | b0       | b0++   | Seq | y        | y++      | y*       | y*++     | y0       | y0++     | RevNo |
|----|----------|--------|----------|--------|-----|----------|----------|----------|----------|----------|----------|-------|
| 1  | 244.18   | 122.59 |          |        | V   |          |          |          |          |          |          | 19    |
| 2  | 341.23   | 171.12 |          |        | P   | 2,025.03 | 1,013.02 | 2,008.01 | 1,004.51 | 2,007.02 | 1,004.01 | 18    |
| 3  | 428.26   | 214.63 | 410.25   | 205.63 | S   | 1,927.98 | 964.49   | 1,910.95 | 955.98   | 1,909.97 | 955.49   | 17    |
| 4  | 529.31   | 265.16 | 511.30   | 256.15 | T   | 1,840.95 | 920.98   | 1,823.92 | 912.46   | 1,822.94 | 911.97   | 16    |
| 5  | 658.35   | 329.68 | 640.34   | 320.67 | E   | 1,739.90 | 870.45   | 1,722.87 | 861.94   | 1,721.89 | 861.45   | 15    |
| 6  | 729.39   | 365.20 | 711.38   | 356.19 | A   | 1,610.86 | 805.93   | 1,593.83 | 797.42   | 1,592.85 | 796.93   | 14    |
| 7  | 858.43   | 429.72 | 840.42   | 420.71 | E   | 1,539.82 | 770.41   | 1,522.79 | 761.90   | 1,521.81 | 761.41   | 13    |
| 8  | 929.47   | 465.24 | 911.46   | 456.23 | A   | 1,410.78 | 705.89   | 1,393.75 | 697.38   | 1,392.77 | 696.89   | 12    |
| 9  | 1,042.55 | 521.78 | 1,024.54 | 512.78 | L   | 1,339.74 | 670.37   | 1,322.71 | 661.86   | 1,321.73 | 661.37   | 11    |
| 10 | 1,113.59 | 557.30 | 1,095.58 | 548.29 | A   | 1,226.66 | 613.83   | 1,209.63 | 605.32   | 1,208.65 | 604.83   | 10    |

|    |          |        |          |        |   |          |        |          |        |          |        |   |
|----|----------|--------|----------|--------|---|----------|--------|----------|--------|----------|--------|---|
| 11 | 1,200.62 | 600.82 | 1,182.61 | 591.81 | S | 1,155.62 | 578.31 | 1,138.59 | 569.80 | 1,137.61 | 569.31 | 9 |
| 12 | 1,287.65 | 644.33 | 1,269.64 | 635.33 | S | 1,068.59 | 534.80 | 1,051.56 | 526.28 | 1,050.58 | 525.79 | 8 |
| 13 | 1,400.74 | 700.87 | 1,382.73 | 691.87 | L | 981.56   | 491.28 | 964.53   | 482.77 | 963.55   | 482.28 | 7 |
| 14 | 1,531.78 | 766.39 | 1,513.77 | 757.39 | M | 868.47   | 434.74 | 851.45   | 426.23 | 850.46   | 425.73 | 6 |
| 15 | 1,588.80 | 794.90 | 1,570.79 | 785.90 | G | 737.43   | 369.22 | 720.40   | 360.71 | 719.42   | 360.21 | 5 |
| 16 | 1,701.89 | 851.45 | 1,683.87 | 842.44 | L | 680.41   | 340.71 | 663.38   | 332.20 | 662.40   | 331.70 | 4 |
| 17 | 1,848.95 | 924.98 | 1,830.94 | 915.98 | F | 567.33   | 284.17 | 550.30   | 275.65 | 549.32   | 275.16 | 3 |
| 18 | 1,978.00 | 989.50 | 1,959.99 | 980.50 | E | 420.26   | 210.63 | 403.23   | 202.12 | 402.25   | 201.63 | 2 |
| 19 |          |        |          |        | K | 291.21   | 146.11 | 274.19   | 137.60 |          |        | 1 |

Query 2358 Hit 1

MS/MS Fragmentation of **ADLEMQIESLTEELAYLK**

Found in **sp|P13645|K1C10\_HUMAN**, Keratin

Match to Query 2358: 2383.237from(795.4197,3+)

Title: 1251: Sum of 2 scans in range 3105 (rt=78.1393, f=4, i=854) to 3106 (rt=78.1647, f=4, i=855)

[D:\lab212\membrane\Grace\20120214\_iTRAQ\_1.raw]

Data File:

**Monoisotopic mass of neutral peptide Mr(calc): 2383.237**

**Variable modifications:**

**K18** iTRAQ4plex (K)

**Ions Score: 66.61 Expect: 0.000**

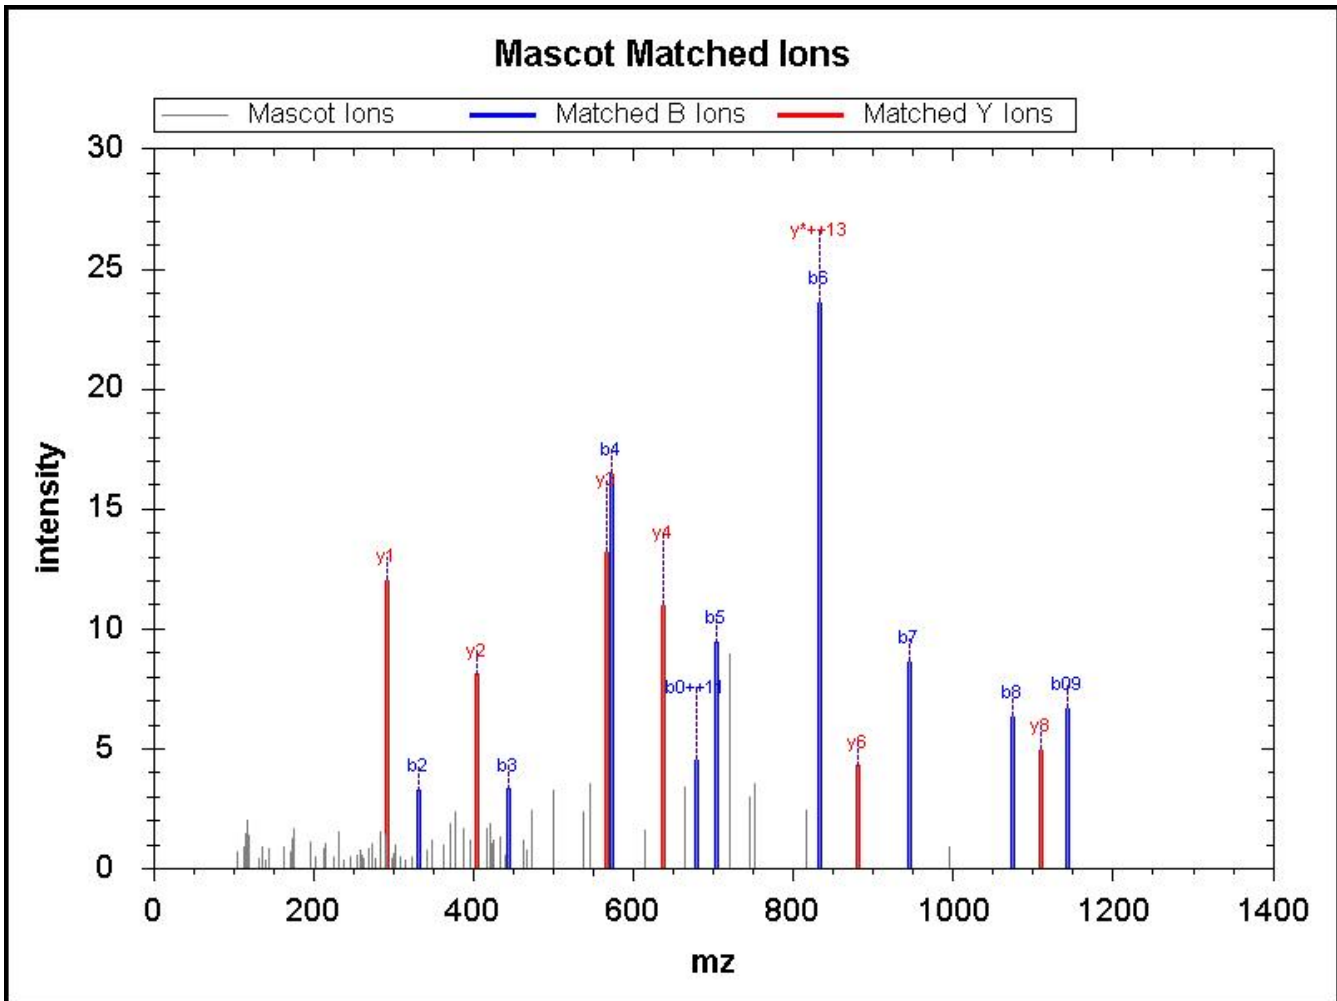

| No | b      | b++    | b* | b*++ | b0     | b0++   | Seq | y        | y++      | y*       | y*++     | y0       | y0++     | RevNo |
|----|--------|--------|----|------|--------|--------|-----|----------|----------|----------|----------|----------|----------|-------|
| 1  | 216.15 | 108.58 |    |      |        |        | A   |          |          |          |          |          |          | 18    |
| 2  | 331.17 | 166.09 |    |      | 313.16 | 157.09 | D   | 2,169.11 | 1,085.06 | 2,152.09 | 1,076.55 | 2,151.10 | 1,076.05 | 17    |
| 3  | 444.26 | 222.63 |    |      | 426.25 | 213.63 | L   | 2,054.08 | 1,027.55 | 2,037.06 | 1,019.03 | 2,036.07 | 1,018.54 | 16    |
| 4  | 573.30 | 287.15 |    |      | 555.29 | 278.15 | E   | 1,941.00 | 971.00   | 1,923.97 | 962.49   | 1,922.99 | 962.00   | 15    |

|    |          |          |          |          |          |          |   |          |        |          |        |          |        |    |
|----|----------|----------|----------|----------|----------|----------|---|----------|--------|----------|--------|----------|--------|----|
| 5  | 704.34   | 352.67   |          |          | 686.33   | 343.67   | M | 1,811.96 | 906.48 | 1,794.93 | 897.97 | 1,793.95 | 897.48 | 14 |
| 6  | 832.40   | 416.70   | 815.37   | 408.19   | 814.39   | 407.70   | Q | 1,680.92 | 840.96 | 1,663.89 | 832.45 | 1,662.91 | 831.96 | 13 |
| 7  | 945.48   | 473.25   | 928.46   | 464.73   | 927.47   | 464.24   | I | 1,552.86 | 776.93 | 1,535.83 | 768.42 | 1,534.85 | 767.93 | 12 |
| 8  | 1,074.53 | 537.77   | 1,057.50 | 529.25   | 1,056.52 | 528.76   | E | 1,439.77 | 720.39 | 1,422.75 | 711.88 | 1,421.76 | 711.39 | 11 |
| 9  | 1,161.56 | 581.28   | 1,144.53 | 572.77   | 1,143.55 | 572.28   | S | 1,310.73 | 655.87 | 1,293.71 | 647.36 | 1,292.72 | 646.86 | 10 |
| 10 | 1,274.64 | 637.82   | 1,257.62 | 629.31   | 1,256.63 | 628.82   | L | 1,223.70 | 612.35 | 1,206.67 | 603.84 | 1,205.69 | 603.35 | 9  |
| 11 | 1,375.69 | 688.35   | 1,358.66 | 679.84   | 1,357.68 | 679.34   | T | 1,110.62 | 555.81 | 1,093.59 | 547.30 | 1,092.61 | 546.81 | 8  |
| 12 | 1,504.73 | 752.87   | 1,487.71 | 744.36   | 1,486.72 | 743.86   | E | 1,009.57 | 505.29 | 992.54   | 496.77 | 991.56   | 496.28 | 7  |
| 13 | 1,633.77 | 817.39   | 1,616.75 | 808.88   | 1,615.76 | 808.39   | E | 880.53   | 440.77 | 863.50   | 432.25 | 862.52   | 431.76 | 6  |
| 14 | 1,746.86 | 873.93   | 1,729.83 | 865.42   | 1,728.85 | 864.93   | L | 751.48   | 376.25 | 734.46   | 367.73 |          |        | 5  |
| 15 | 1,817.90 | 909.45   | 1,800.87 | 900.94   | 1,799.89 | 900.45   | A | 638.40   | 319.70 | 621.37   | 311.19 |          |        | 4  |
| 16 | 1,980.96 | 990.98   | 1,963.93 | 982.47   | 1,962.95 | 981.98   | Y | 567.36   | 284.18 | 550.34   | 275.67 |          |        | 3  |
| 17 | 2,094.04 | 1,047.53 | 2,077.02 | 1,039.01 | 2,076.03 | 1,038.52 | L | 404.30   | 202.65 | 387.27   | 194.14 |          |        | 2  |
| 18 |          |          |          |          |          |          | K | 291.21   | 146.11 | 274.19   | 137.60 |          |        | 1  |

Query 2368 Hit 1

MS/MS Fragmentation of **ISDGVVLFIDAAEGVMLNTER**

Found in **sp|Q15029|U5S1\_HUMAN**, 116 kDa U5 small nuclear ribonucleoprotein component OS=Homo sapiens GN=EFTUD2 PE=1 SV=1

Match to Query 2368: 2392.235from(798.4189,3+)

Title: 1414: Sum of 2 scans in range 3494 (rt=86.8729, f=4, i=966) to 3495 (rt=86.8984, f=4, i=967)

[D:\lab212\membrane\Grace\20120214\_iTRAQ\_1.raw]

Data File:

**Monoisotopic mass of neutral peptide Mr(calc): 2392.235**

**Variable modifications:**

**Ions Score: 67.68 Expect: 0.000**

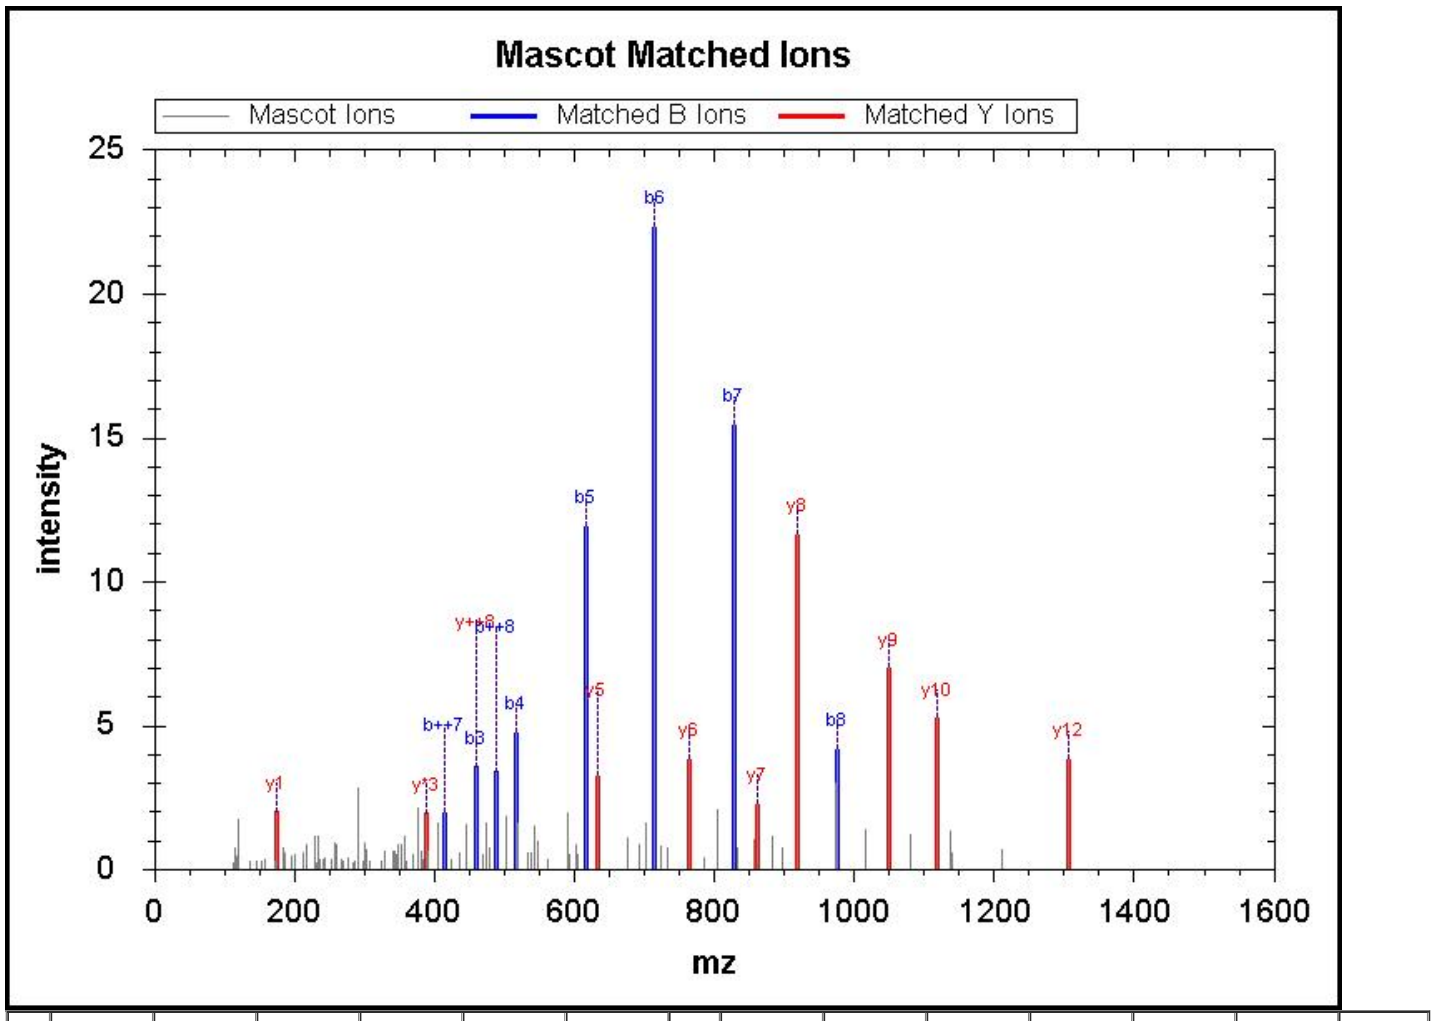



| No | b        | b++      | b*       | b*++     | b0       | b0++     | Seq | y        | y++      | y*       | y*++     | y0       | y0++     | RevNo |
|----|----------|----------|----------|----------|----------|----------|-----|----------|----------|----------|----------|----------|----------|-------|
| 1  | 258.19   | 129.60   |          |          |          |          | I   |          |          |          |          |          |          | 21    |
| 2  | 345.23   | 173.12   |          |          | 327.21   | 164.11   | S   | 2,136.06 | 1,068.54 | 2,119.04 | 1,060.02 | 2,118.05 | 1,059.53 | 20    |
| 3  | 460.25   | 230.63   |          |          | 442.24   | 221.62   | D   | 2,049.03 | 1,025.02 | 2,032.01 | 1,016.51 | 2,031.02 | 1,016.01 | 19    |
| 4  | 517.27   | 259.14   |          |          | 499.26   | 250.14   | G   | 1,934.01 | 967.51   | 1,916.98 | 958.99   | 1,915.99 | 958.50   | 18    |
| 5  | 616.34   | 308.67   |          |          | 598.33   | 299.67   | V   | 1,876.98 | 939.00   | 1,859.96 | 930.48   | 1,858.97 | 929.99   | 17    |
| 6  | 715.41   | 358.21   |          |          | 697.40   | 349.20   | V   | 1,777.92 | 889.46   | 1,760.89 | 880.95   | 1,759.90 | 880.46   | 16    |
| 7  | 828.49   | 414.75   |          |          | 810.48   | 405.75   | L   | 1,678.85 | 839.93   | 1,661.82 | 831.41   | 1,660.84 | 830.92   | 15    |
| 8  | 975.56   | 488.29   |          |          | 957.55   | 479.28   | F   | 1,565.76 | 783.39   | 1,548.74 | 774.87   | 1,547.75 | 774.38   | 14    |
| 9  | 1,088.65 | 544.83   |          |          | 1,070.64 | 535.82   | I   | 1,418.69 | 709.85   | 1,401.67 | 701.34   | 1,400.68 | 700.85   | 13    |
| 10 | 1,203.67 | 602.34   |          |          | 1,185.66 | 593.34   | D   | 1,305.61 | 653.31   | 1,288.58 | 644.80   | 1,287.60 | 644.30   | 12    |
| 11 | 1,274.71 | 637.86   |          |          | 1,256.70 | 628.85   | A   | 1,190.58 | 595.80   | 1,173.56 | 587.28   | 1,172.57 | 586.79   | 11    |
| 12 | 1,345.75 | 673.38   |          |          | 1,327.74 | 664.37   | A   | 1,119.55 | 560.28   | 1,102.52 | 551.76   | 1,101.54 | 551.27   | 10    |
| 13 | 1,474.79 | 737.90   |          |          | 1,456.78 | 728.89   | E   | 1,048.51 | 524.76   | 1,031.48 | 516.24   | 1,030.50 | 515.75   | 9     |
| 14 | 1,531.81 | 766.41   |          |          | 1,513.80 | 757.40   | G   | 919.47   | 460.24   | 902.44   | 451.72   | 901.46   | 451.23   | 8     |
| 15 | 1,630.88 | 815.94   |          |          | 1,612.87 | 806.94   | V   | 862.45   | 431.73   | 845.42   | 423.21   | 844.43   | 422.72   | 7     |
| 16 | 1,761.92 | 881.46   |          |          | 1,743.91 | 872.46   | M   | 763.38   | 382.19   | 746.35   | 373.68   | 745.37   | 373.19   | 6     |
| 17 | 1,875.01 | 938.01   |          |          | 1,856.99 | 929.00   | L   | 632.34   | 316.67   | 615.31   | 308.16   | 614.33   | 307.67   | 5     |
| 18 | 1,989.05 | 995.03   | 1,972.02 | 986.51   | 1,971.04 | 986.02   | N   | 519.25   | 260.13   | 502.23   | 251.62   | 501.24   | 251.12   | 4     |
| 19 | 2,090.10 | 1,045.55 | 2,073.07 | 1,037.04 | 2,072.09 | 1,036.55 | T   | 405.21   | 203.11   | 388.18   | 194.59   | 387.20   | 194.10   | 3     |
| 20 | 2,219.14 | 1,110.07 | 2,202.11 | 1,101.56 | 2,201.13 | 1,101.07 | E   | 304.16   | 152.58   | 287.13   | 144.07   | 286.15   | 143.58   | 2     |
| 21 |          |          |          |          |          |          | R   | 175.12   | 88.06    | 158.09   | 79.55    |          |          | 1     |

Query 2962 Hit 1

MS/MS Fragmentation of **AFAMIIDKLEEDISSMNTNSTAASRPPVTLR**

Found in **sp|Q15366|PCBP2\_HUMAN**, Poly(rC)-binding protein 2 OS=Homo sapiens GN=PCBP2 PE=1 SV=1

Match to Query 2962: 3638.889from(910.7295,4+)

Title: 1295: Scan 3153 (rt=79.3036, f=3, i=463) [D:\lab212\membrane\Grace\20120214\_iTRAQ\_2.raw]

Data File:

**Monoisotopic mass of neutral peptide Mr(calc): 3638.889**

**Variable modifications:**

**K8** iTRAQ4plex (K)

**Ions Score: 70.84 Expect: 0.000**

### Mascot Matched Ions

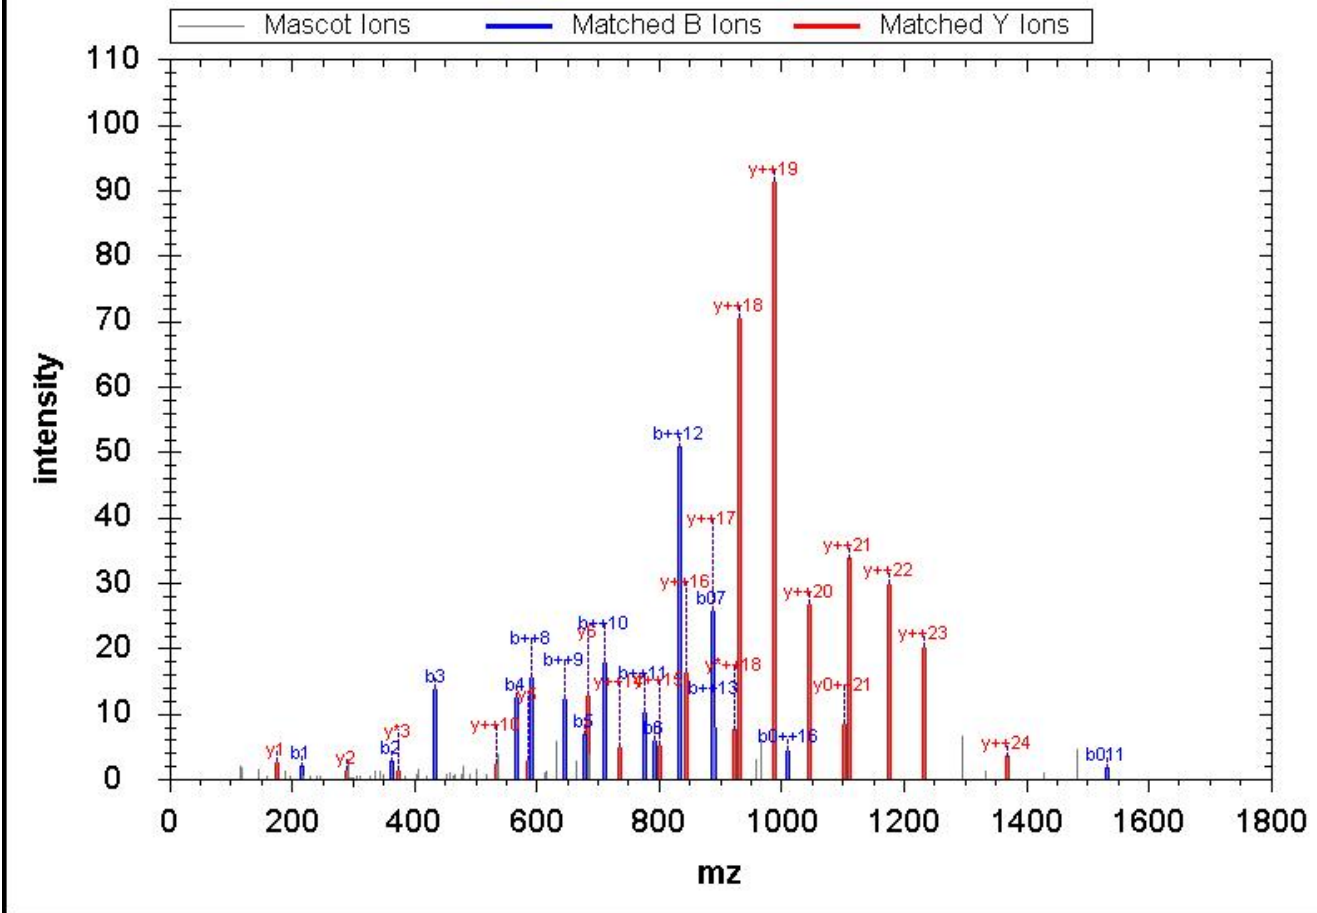

| No | b             | b++           | b*       | b*++     | b0              | b0++            | Seq | y        | y++             | y*       | y*++          | y0       | y0++            | RevNo |
|----|---------------|---------------|----------|----------|-----------------|-----------------|-----|----------|-----------------|----------|---------------|----------|-----------------|-------|
| 1  | <b>216.15</b> | 108.58        |          |          |                 |                 | A   |          |                 |          |               |          |                 | 31    |
| 2  | <b>363.21</b> | 182.11        |          |          |                 |                 | F   | 3,424.76 | 1,712.88        | 3,407.73 | 1,704.37      | 3,406.75 | 1,703.88        | 30    |
| 3  | <b>434.25</b> | 217.63        |          |          |                 |                 | A   | 3,277.69 | 1,639.35        | 3,260.66 | 1,630.83      | 3,259.68 | 1,630.34        | 29    |
| 4  | <b>565.29</b> | 283.15        |          |          |                 |                 | M   | 3,206.65 | 1,603.83        | 3,189.62 | 1,595.32      | 3,188.64 | 1,594.82        | 28    |
| 5  | <b>678.38</b> | 339.69        |          |          |                 |                 | I   | 3,075.61 | 1,538.31        | 3,058.58 | 1,529.80      | 3,057.60 | 1,529.30        | 27    |
| 6  | <b>791.46</b> | 396.23        |          |          |                 |                 | I   | 2,962.53 | 1,481.77        | 2,945.50 | 1,473.25      | 2,944.52 | 1,472.76        | 26    |
| 7  | 906.49        | 453.75        |          |          | <b>888.48</b>   | 444.74          | D   | 2,849.44 | 1,425.22        | 2,832.42 | 1,416.71      | 2,831.43 | 1,416.22        | 25    |
| 8  | 1,178.68      | <b>589.85</b> | 1,161.66 | 581.33   | 1,160.67        | 580.84          | K   | 2,734.42 | <b>1,367.71</b> | 2,717.39 | 1,359.20      | 2,716.41 | 1,358.71        | 24    |
| 9  | 1,291.77      | <b>646.39</b> | 1,274.74 | 637.87   | 1,273.76        | 637.38          | L   | 2,462.22 | <b>1,231.61</b> | 2,445.19 | 1,223.10      | 2,444.21 | 1,222.61        | 23    |
| 10 | 1,420.81      | <b>710.91</b> | 1,403.78 | 702.40   | 1,402.80        | 701.90          | E   | 2,349.13 | <b>1,175.07</b> | 2,332.11 | 1,166.56      | 2,331.12 | 1,166.07        | 22    |
| 11 | 1,549.85      | <b>775.43</b> | 1,532.83 | 766.92   | <b>1,531.84</b> | 766.43          | E   | 2,220.09 | <b>1,110.55</b> | 2,203.07 | 1,102.04      | 2,202.08 | <b>1,101.54</b> | 21    |
| 12 | 1,664.88      | <b>832.94</b> | 1,647.85 | 824.43   | 1,646.87        | 823.94          | D   | 2,091.05 | <b>1,046.03</b> | 2,074.02 | 1,037.52      | 2,073.04 | 1,037.02        | 20    |
| 13 | 1,777.96      | <b>889.49</b> | 1,760.94 | 880.97   | 1,759.95        | 880.48          | I   | 1,976.02 | <b>988.52</b>   | 1,959.00 | 980.00        | 1,958.01 | 979.51          | 19    |
| 14 | 1,865.00      | 933.00        | 1,847.97 | 924.49   | 1,846.99        | 924.00          | S   | 1,862.94 | <b>931.97</b>   | 1,845.91 | <b>923.46</b> | 1,844.93 | 922.97          | 18    |
| 15 | 1,952.03      | 976.52        | 1,935.00 | 968.00   | 1,934.02        | 967.51          | S   | 1,775.91 | <b>888.46</b>   | 1,758.88 | 879.94        | 1,757.90 | 879.45          | 17    |
| 16 | 2,039.06      | 1,020.03      | 2,022.03 | 1,011.52 | 2,021.05        | <b>1,011.03</b> | S   | 1,688.87 | <b>844.94</b>   | 1,671.85 | 836.43        | 1,670.86 | 835.94          | 16    |
| 17 | 2,170.10      | 1,085.55      | 2,153.07 | 1,077.04 | 2,152.09        | 1,076.55        | M   | 1,601.84 | <b>801.43</b>   | 1,584.82 | 792.91        | 1,583.83 | 792.42          | 15    |
| 18 | 2,271.15      | 1,136.08      | 2,254.12 | 1,127.56 | 2,253.14        | 1,127.07        | T   | 1,470.80 | <b>735.90</b>   | 1,453.78 | 727.39        | 1,452.79 | 726.90          | 14    |
| 19 | 2,385.19      | 1,193.10      | 2,368.17 | 1,184.59 | 2,367.18        | 1,184.09        | N   | 1,369.75 | 685.38          | 1,352.73 | 676.87        | 1,351.74 | 676.38          | 13    |
| 20 | 2,472.22      | 1,236.62      | 2,455.20 | 1,228.10 | 2,454.21        | 1,227.61        | S   | 1,255.71 | 628.36          | 1,238.69 | 619.85        | 1,237.70 | 619.35          | 12    |
| 21 | 2,573.27      | 1,287.14      | 2,556.24 | 1,278.63 | 2,555.26        | 1,278.13        | T   | 1,168.68 | 584.84          | 1,151.65 | 576.33        | 1,150.67 | 575.84          | 11    |
| 22 | 2,644.31      | 1,322.66      | 2,627.28 | 1,314.14 | 2,626.30        | 1,313.65        | A   | 1,067.63 | <b>534.32</b>   | 1,050.61 | 525.81        | 1,049.62 | 525.31          | 10    |
| 23 | 2,715.35      | 1,358.18      | 2,698.32 | 1,349.66 | 2,697.34        | 1,349.17        | A   | 996.59   | 498.80          | 979.57   | 490.29        | 978.58   | 489.80          | 9     |

|    |          |          |          |          |          |          |   |        |        |        |        |        |        |   |
|----|----------|----------|----------|----------|----------|----------|---|--------|--------|--------|--------|--------|--------|---|
| 24 | 2,802.38 | 1,401.69 | 2,785.35 | 1,393.18 | 2,784.37 | 1,392.69 | S | 925.56 | 463.28 | 908.53 | 454.77 | 907.55 | 454.28 | 8 |
| 25 | 2,958.48 | 1,479.74 | 2,941.45 | 1,471.23 | 2,940.47 | 1,470.74 | R | 838.53 | 419.77 | 821.50 | 411.25 | 820.52 | 410.76 | 7 |
| 26 | 3,055.53 | 1,528.27 | 3,038.50 | 1,519.76 | 3,037.52 | 1,519.26 | P | 682.42 | 341.72 | 665.40 | 333.20 | 664.41 | 332.71 | 6 |
| 27 | 3,152.58 | 1,576.80 | 3,135.56 | 1,568.28 | 3,134.57 | 1,567.79 | P | 585.37 | 293.19 | 568.35 | 284.68 | 567.36 | 284.18 | 5 |
| 28 | 3,251.65 | 1,626.33 | 3,234.63 | 1,617.82 | 3,233.64 | 1,617.32 | V | 488.32 | 244.66 | 471.29 | 236.15 | 470.31 | 235.66 | 4 |
| 29 | 3,352.70 | 1,676.85 | 3,335.67 | 1,668.34 | 3,334.69 | 1,667.85 | T | 389.25 | 195.13 | 372.22 | 186.62 | 371.24 | 186.12 | 3 |
| 30 | 3,465.78 | 1,733.40 | 3,448.76 | 1,724.88 | 3,447.77 | 1,724.39 | L | 288.20 | 144.61 | 271.18 | 136.09 |        |        | 2 |
| 31 |          |          |          |          |          |          | R | 175.12 | 88.06  | 158.09 | 79.55  |        |        | 1 |

Query 2505 Hit 1

MS/MS Fragmentation of **LIPEMDQIFTEVEMTTLEK**

Found in **sp|Q9Y4L1|HYOU1\_HUMAN**, Hypoxia up-regulated protein 1 OS=Homo sapiens GN=HYOU1 PE=1 SV=1

Match to Query 2505: 2554.313 from (852.4451, 3+)

Title: 1298: Sum of 2 scans in range 3204 (rt=80.3707, f=4, i=886) to 3205 (rt=80.3961, f=4, i=887)

[D:\lab212\membrane\Grace\20120214\_iTRAQ\_1.raw]

Data File:

**Monoisotopic mass of neutral peptide Mr(calc): 2554.313**

**Variable modifications:**

**K19** iTRAQ4plex (K)

**Ions Score: 74.34 Expect: 0.000**

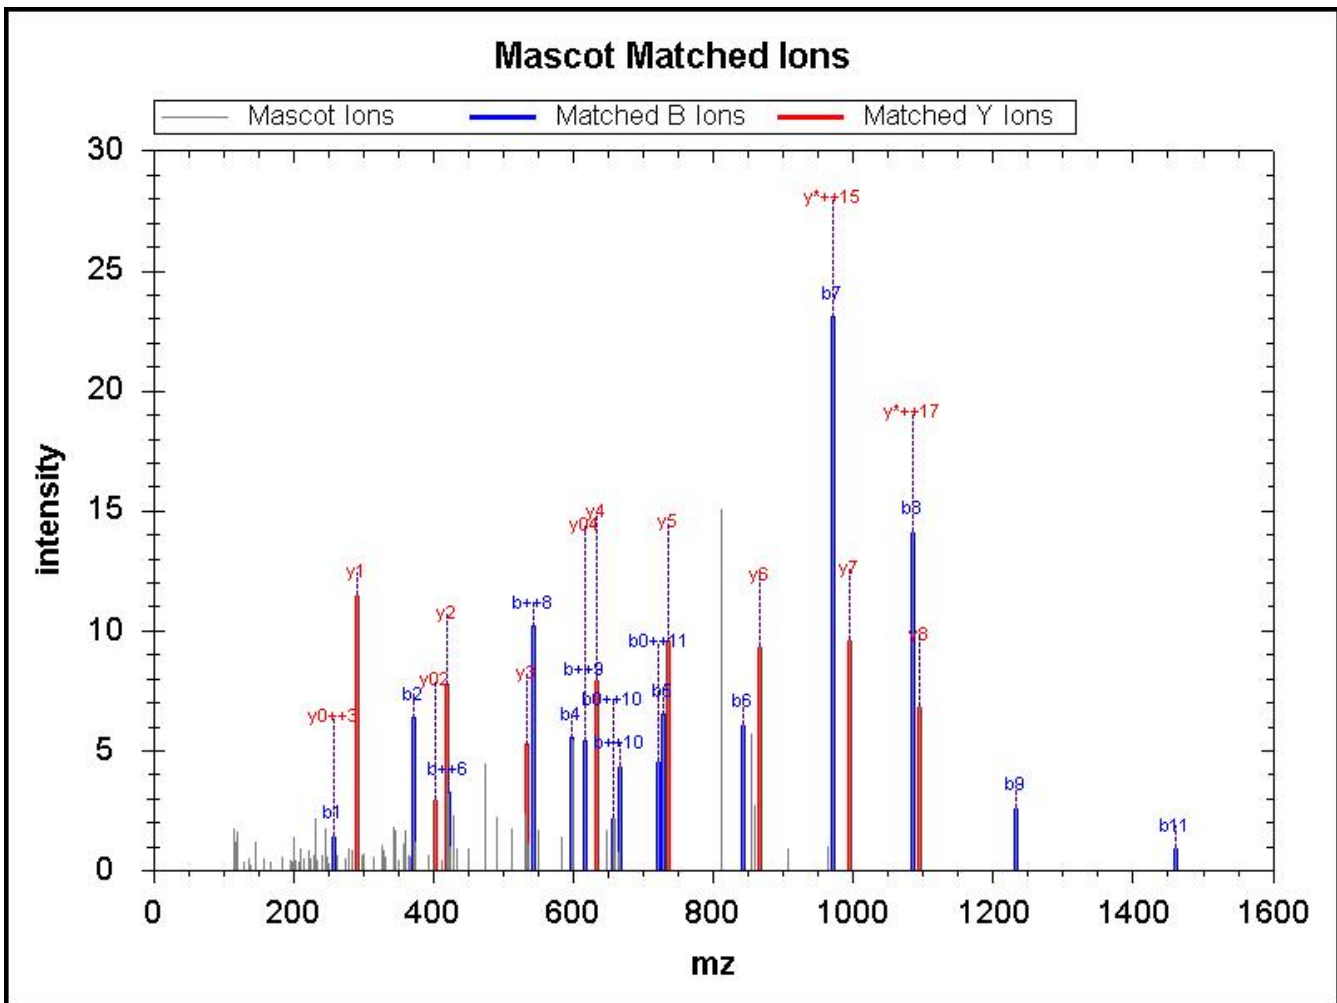

| No | b      | b++    | b* | b*++ | b0     | b0++   | Seq | y        | y++      | y*       | y*++     | y0       | y0++     | RevNo |
|----|--------|--------|----|------|--------|--------|-----|----------|----------|----------|----------|----------|----------|-------|
| 1  | 258.19 | 129.60 |    |      |        |        | L   |          |          |          |          |          |          | 19    |
| 2  | 371.28 | 186.14 |    |      |        |        | I   | 2,298.14 | 1,149.57 | 2,281.11 | 1,141.06 | 2,280.13 | 1,140.57 | 18    |
| 3  | 468.33 | 234.67 |    |      |        |        | P   | 2,185.05 | 1,093.03 | 2,168.03 | 1,084.52 | 2,167.04 | 1,084.02 | 17    |
| 4  | 597.37 | 299.19 |    |      | 579.36 | 290.18 | E   | 2,088.00 | 1,044.50 | 2,070.97 | 1,035.99 | 2,069.99 | 1,035.50 | 16    |
| 5  | 728.41 | 364.71 |    |      | 710.40 | 355.70 | M   | 1,958.96 | 979.98   | 1,941.93 | 971.47   | 1,940.95 | 970.98   | 15    |

|    |          |          |          |          |          |          |   |          |        |          |        |          |        |    |
|----|----------|----------|----------|----------|----------|----------|---|----------|--------|----------|--------|----------|--------|----|
| 6  | 843.44   | 422.22   |          |          | 825.43   | 413.22   | D | 1,827.92 | 914.46 | 1,810.89 | 905.95 | 1,809.91 | 905.46 | 14 |
| 7  | 971.50   | 486.25   | 954.47   | 477.74   | 953.49   | 477.25   | Q | 1,712.89 | 856.95 | 1,695.86 | 848.44 | 1,694.88 | 847.94 | 13 |
| 8  | 1,084.58 | 542.80   | 1,067.56 | 534.28   | 1,066.57 | 533.79   | I | 1,584.83 | 792.92 | 1,567.80 | 784.41 | 1,566.82 | 783.91 | 12 |
| 9  | 1,231.65 | 616.33   | 1,214.62 | 607.82   | 1,213.64 | 607.32   | F | 1,471.75 | 736.38 | 1,454.72 | 727.86 | 1,453.74 | 727.37 | 11 |
| 10 | 1,332.70 | 666.85   | 1,315.67 | 658.34   | 1,314.69 | 657.85   | T | 1,324.68 | 662.84 | 1,307.65 | 654.33 | 1,306.67 | 653.84 | 10 |
| 11 | 1,461.74 | 731.37   | 1,444.72 | 722.86   | 1,443.73 | 722.37   | E | 1,223.63 | 612.32 | 1,206.60 | 603.81 | 1,205.62 | 603.31 | 9  |
| 12 | 1,560.81 | 780.91   | 1,543.78 | 772.40   | 1,542.80 | 771.90   | V | 1,094.59 | 547.80 | 1,077.56 | 539.28 | 1,076.58 | 538.79 | 8  |
| 13 | 1,689.85 | 845.43   | 1,672.83 | 836.92   | 1,671.84 | 836.42   | E | 995.52   | 498.26 | 978.49   | 489.75 | 977.51   | 489.26 | 7  |
| 14 | 1,820.89 | 910.95   | 1,803.87 | 902.44   | 1,802.88 | 901.94   | M | 866.48   | 433.74 | 849.45   | 425.23 | 848.47   | 424.74 | 6  |
| 15 | 1,921.94 | 961.47   | 1,904.91 | 952.96   | 1,903.93 | 952.47   | T | 735.44   | 368.22 | 718.41   | 359.71 | 717.43   | 359.22 | 5  |
| 16 | 2,022.99 | 1,012.00 | 2,005.96 | 1,003.48 | 2,004.98 | 1,002.99 | T | 634.39   | 317.70 | 617.36   | 309.18 | 616.38   | 308.69 | 4  |
| 17 | 2,136.07 | 1,068.54 | 2,119.05 | 1,060.03 | 2,118.06 | 1,059.53 | L | 533.34   | 267.17 | 516.31   | 258.66 | 515.33   | 258.17 | 3  |
| 18 | 2,265.12 | 1,133.06 | 2,248.09 | 1,124.55 | 2,247.10 | 1,124.06 | E | 420.26   | 210.63 | 403.23   | 202.12 | 402.25   | 201.63 | 2  |
| 19 |          |          |          |          |          |          | K | 291.21   | 146.11 | 274.19   | 137.60 |          |        | 1  |

Query 2665 Hit 1

MS/MS Fragmentation of **AQNVPLPVSTLVEFVIAATDCTAK**

Found in **sp|P29699|FETUA\_MOUSE**, Alpha-2-HS-glycoprotein OS=Mus musculus GN=Ahsg PE=1 SV=1

Match to Query 2665: 2820.506from(941.176,3+)

Title: 1487: Sum of 2 scans in range 3933 (rt=96.0486, f=2, i=671) to 3934 (rt=96.074, f=2, i=672)

[D:\lab212\membrane\Grace\20120214\_iTRAQ\_1.raw]

Data File:

**Monoisotopic mass of neutral peptide Mr(calc): 2820.506**

**Variable modifications:**

**C21** :Methylthio (C)

**K24** :iTRAQ4plex (K)

**Ions Score: 75.07 Expect: 0.000**

### Mascot Matched Ions

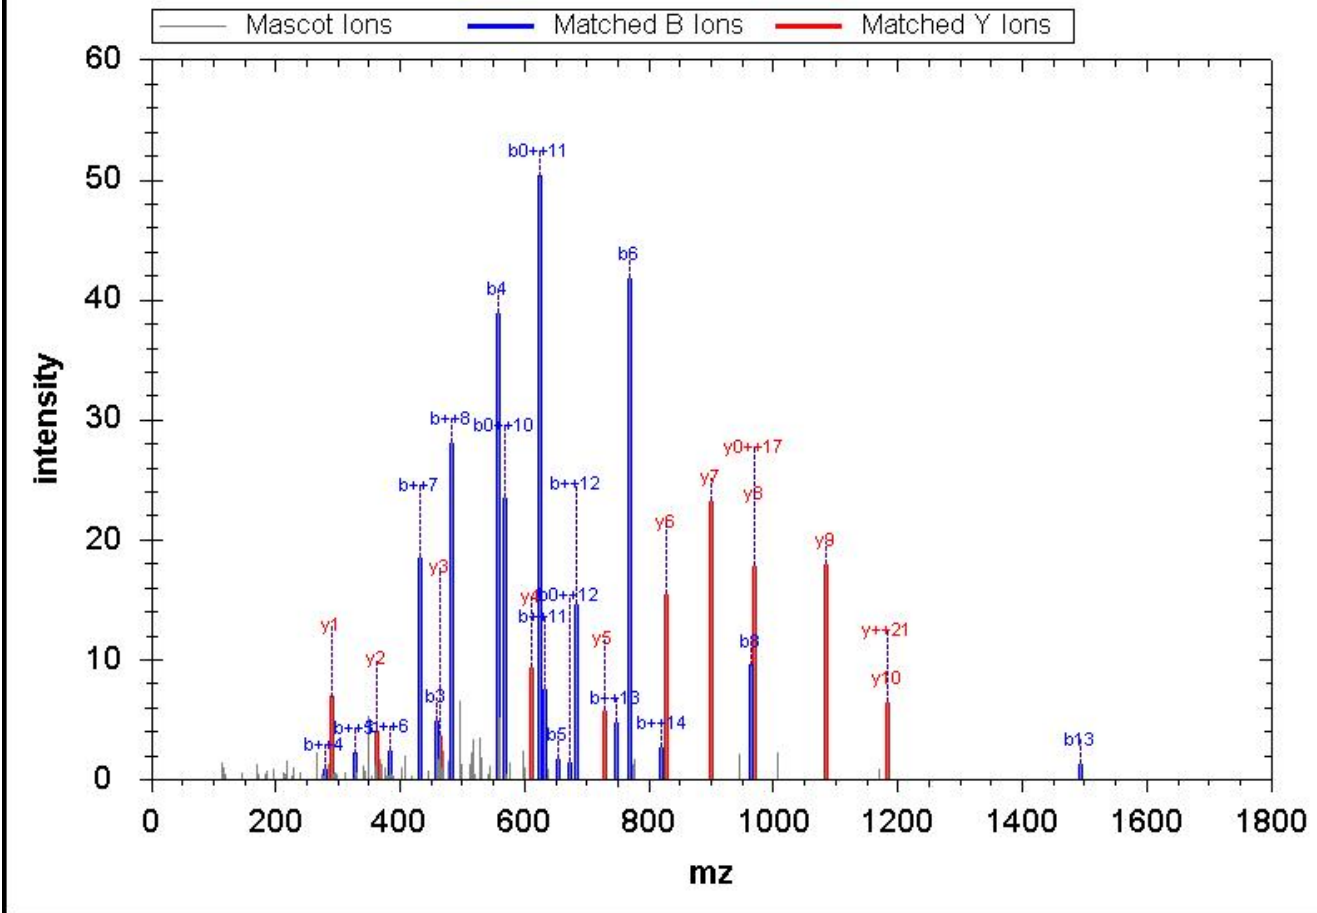

| No | b               | b++           | b*       | b*++     | b0       | b0++          | Seq | y               | y++             | y*       | y*++     | y0       | y0++          | RevNo |
|----|-----------------|---------------|----------|----------|----------|---------------|-----|-----------------|-----------------|----------|----------|----------|---------------|-------|
| 1  | 216.15          | 108.58        |          |          |          |               | A   |                 |                 |          |          |          |               | 24    |
| 2  | 344.21          | 172.61        | 327.18   | 164.09   |          |               | Q   | 2,606.37        | 1,303.69        | 2,589.34 | 1,295.17 | 2,588.36 | 1,294.68      | 23    |
| 3  | <b>458.25</b>   | 229.63        | 441.22   | 221.11   |          |               | N   | 2,478.31        | 1,239.66        | 2,461.28 | 1,231.15 | 2,460.30 | 1,230.65      | 22    |
| 4  | <b>557.32</b>   | <b>279.16</b> | 540.29   | 270.65   |          |               | V   | 2,364.27        | <b>1,182.64</b> | 2,347.24 | 1,174.12 | 2,346.26 | 1,173.63      | 21    |
| 5  | <b>654.37</b>   | <b>327.69</b> | 637.34   | 319.17   |          |               | P   | 2,265.20        | 1,133.10        | 2,248.17 | 1,124.59 | 2,247.19 | 1,124.10      | 20    |
| 6  | <b>767.45</b>   | <b>384.23</b> | 750.43   | 375.72   |          |               | L   | 2,168.15        | 1,084.58        | 2,151.12 | 1,076.06 | 2,150.14 | 1,075.57      | 19    |
| 7  | 864.51          | <b>432.76</b> | 847.48   | 424.24   |          |               | P   | 2,055.06        | 1,028.03        | 2,038.04 | 1,019.52 | 2,037.05 | 1,019.03      | 18    |
| 8  | <b>963.57</b>   | <b>482.29</b> | 946.55   | 473.78   |          |               | V   | 1,958.01        | 979.51          | 1,940.98 | 971.00   | 1,940.00 | <b>970.50</b> | 17    |
| 9  | 1,050.61        | 525.81        | 1,033.58 | 517.29   | 1,032.60 | 516.80        | S   | 1,858.94        | 929.97          | 1,841.91 | 921.46   | 1,840.93 | 920.97        | 16    |
| 10 | 1,151.65        | 576.33        | 1,134.63 | 567.82   | 1,133.64 | <b>567.33</b> | T   | 1,771.91        | 886.46          | 1,754.88 | 877.94   | 1,753.90 | 877.45        | 15    |
| 11 | 1,264.74        | <b>632.87</b> | 1,247.71 | 624.36   | 1,246.73 | <b>623.87</b> | L   | 1,670.86        | 835.93          | 1,653.83 | 827.42   | 1,652.85 | 826.93        | 14    |
| 12 | 1,363.81        | <b>682.41</b> | 1,346.78 | 673.89   | 1,345.80 | <b>673.40</b> | V   | 1,557.78        | 779.39          | 1,540.75 | 770.88   | 1,539.77 | 770.39        | 13    |
| 13 | <b>1,492.85</b> | <b>746.93</b> | 1,475.82 | 738.42   | 1,474.84 | 737.92        | E   | 1,458.71        | 729.86          | 1,441.68 | 721.34   | 1,440.70 | 720.85        | 12    |
| 14 | 1,639.92        | <b>820.46</b> | 1,622.89 | 811.95   | 1,621.91 | 811.46        | F   | 1,329.67        | 665.34          | 1,312.64 | 656.82   | 1,311.66 | 656.33        | 11    |
| 15 | 1,738.99        | 870.00        | 1,721.96 | 861.48   | 1,720.98 | 860.99        | V   | <b>1,182.60</b> | 591.80          | 1,165.57 | 583.29   | 1,164.59 | 582.80        | 10    |
| 16 | 1,852.07        | 926.54        | 1,835.04 | 918.03   | 1,834.06 | 917.53        | I   | <b>1,083.53</b> | 542.27          | 1,066.50 | 533.76   | 1,065.52 | 533.26        | 9     |
| 17 | 1,923.11        | 962.06        | 1,906.08 | 953.54   | 1,905.10 | 953.05        | A   | <b>970.45</b>   | 485.73          | 953.42   | 477.21   | 952.43   | 476.72        | 8     |
| 18 | 1,994.14        | 997.58        | 1,977.12 | 989.06   | 1,976.13 | 988.57        | A   | <b>899.41</b>   | 450.21          | 882.38   | 441.69   | 881.40   | 441.20        | 7     |
| 19 | 2,095.19        | 1,048.10      | 2,078.17 | 1,039.59 | 2,077.18 | 1,039.09      | T   | <b>828.37</b>   | 414.69          | 811.34   | 406.18   | 810.36   | 405.68        | 6     |
| 20 | 2,210.22        | 1,105.61      | 2,193.19 | 1,097.10 | 2,192.21 | 1,096.61      | D   | <b>727.32</b>   | 364.17          | 710.30   | 355.65   | 709.31   | 355.16        | 5     |
| 21 | 2,359.22        | 1,180.11      | 2,342.19 | 1,171.60 | 2,341.21 | 1,171.11      | C   | <b>612.30</b>   | 306.65          | 595.27   | 298.14   | 594.29   | 297.65        | 4     |
| 22 | 2,460.26        | 1,230.64      | 2,443.24 | 1,222.12 | 2,442.25 | 1,221.63      | T   | <b>463.30</b>   | 232.15          | 446.27   | 223.64   | 445.29   | 223.15        | 3     |
| 23 | 2,531.30        | 1,266.15      | 2,514.27 | 1,257.64 | 2,513.29 | 1,257.15      | A   | <b>362.25</b>   | 181.63          | 345.23   | 173.12   |          |               | 2     |

Query 2009 Hit 1

MS/MS Fragmentation of **TMLELLNQLDGFEATK**

Found in **sp|P62195|PRS8\_HUMAN**, 26S protease regulatory subunit 8 OS=Homo sapiens GN=PSMC5 PE=1 SV=1

Match to Query 2009: 2110.124from(704.382,3+)

Title: 1136: Sum of 2 scans in range 2807 (rt=71.5096, f=4, i=755) to 2808 (rt=71.535, f=4, i=756)

[D:\lab212\membrane\Grace\20120214\_iTRAQ\_2.raw]

Data File:

**Monoisotopic mass of neutral peptide Mr(calc): 2110.124**

**Variable modifications:**

**K16** :iTRAQ4plex (K)

**Ions Score: 75.67 Expect: 0.000**

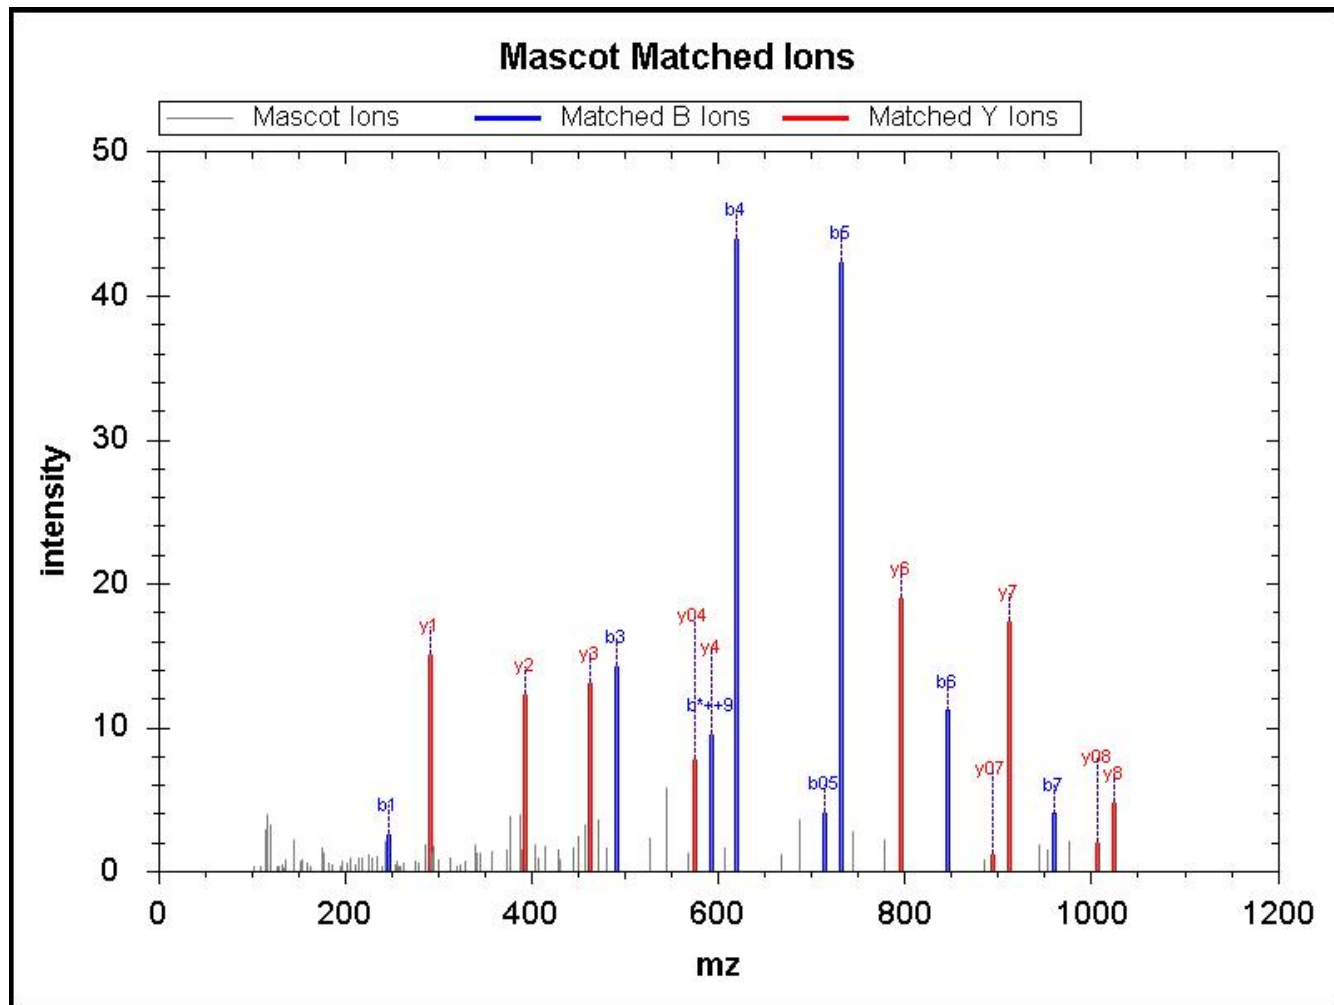

| No | b        | b++    | b*       | b*++   | b0       | b0++   | Seq | y        | y++    | y*       | y*++   | y0       | y0++   | RevNo |
|----|----------|--------|----------|--------|----------|--------|-----|----------|--------|----------|--------|----------|--------|-------|
| 1  | 246.16   | 123.58 |          |        | 228.15   | 114.58 | T   |          |        |          |        |          |        | 16    |
| 2  | 377.20   | 189.10 |          |        | 359.19   | 180.10 | M   | 1,865.98 | 933.49 | 1,848.95 | 924.98 | 1,847.97 | 924.49 | 15    |
| 3  | 490.28   | 245.64 |          |        | 472.27   | 236.64 | L   | 1,734.94 | 867.97 | 1,717.91 | 859.46 | 1,716.93 | 858.97 | 14    |
| 4  | 619.32   | 310.17 |          |        | 601.31   | 301.16 | E   | 1,621.86 | 811.43 | 1,604.83 | 802.92 | 1,603.84 | 802.43 | 13    |
| 5  | 732.41   | 366.71 |          |        | 714.40   | 357.70 | L   | 1,492.81 | 746.91 | 1,475.79 | 738.40 | 1,474.80 | 737.90 | 12    |
| 6  | 845.49   | 423.25 |          |        | 827.48   | 414.24 | L   | 1,379.73 | 690.37 | 1,362.70 | 681.85 | 1,361.72 | 681.36 | 11    |
| 7  | 959.54   | 480.27 | 942.51   | 471.76 | 941.52   | 471.27 | N   | 1,266.64 | 633.83 | 1,249.62 | 625.31 | 1,248.63 | 624.82 | 10    |
| 8  | 1,087.59 | 544.30 | 1,070.57 | 535.79 | 1,069.58 | 535.30 | Q   | 1,152.60 | 576.80 | 1,135.58 | 568.29 | 1,134.59 | 567.80 | 9     |
| 9  | 1,200.68 | 600.84 | 1,183.65 | 592.33 | 1,182.67 | 591.84 | L   | 1,024.54 | 512.78 | 1,007.52 | 504.26 | 1,006.53 | 503.77 | 8     |
| 10 | 1,315.70 | 658.36 | 1,298.68 | 649.84 | 1,297.69 | 649.35 | D   | 911.46   | 456.23 | 894.43   | 447.72 | 893.45   | 447.23 | 7     |
| 11 | 1,372.73 | 686.87 | 1,355.70 | 678.35 | 1,354.72 | 677.86 | G   | 796.43   | 398.72 | 779.41   | 390.21 | 778.42   | 389.71 | 6     |
| 12 | 1,519.79 | 760.40 | 1,502.77 | 751.89 | 1,501.78 | 751.40 | F   | 739.41   | 370.21 | 722.38   | 361.70 | 721.40   | 361.20 | 5     |

|    |          |        |          |        |          |        |   |        |        |        |        |        |        |   |
|----|----------|--------|----------|--------|----------|--------|---|--------|--------|--------|--------|--------|--------|---|
| 13 | 1,648.84 | 824.92 | 1,631.81 | 816.41 | 1,630.83 | 815.92 | E | 592.34 | 296.67 | 575.32 | 288.16 | 574.33 | 287.67 | 4 |
| 14 | 1,719.87 | 860.44 | 1,702.85 | 851.93 | 1,701.86 | 851.44 | A | 463.30 | 232.15 | 446.27 | 223.64 | 445.29 | 223.15 | 3 |
| 15 | 1,820.92 | 910.96 | 1,803.90 | 902.45 | 1,802.91 | 901.96 | T | 392.26 | 196.63 | 375.24 | 188.12 | 374.25 | 187.63 | 2 |
| 16 |          |        |          |        |          |        | K | 291.21 | 146.11 | 274.19 | 137.60 |        |        | 1 |

Query 1132 Hit 1

MS/MS Fragmentation of **ALDTMNFQVIK**

Found in **sp|P11940|PABP1\_HUMAN**, Polyadenylate-binding protein 1 OS=Homo sapiens GN=PABPC1 PE=1 SV=2

Match to Query 1132: 1553.835from(777.9249,2+)

Title: 710: Sum of 2 scans in range 1964 (rt=52.4297, f=4, i=486) to 1965 (rt=52.4551, f=4, i=487)

[D:\lab212\membrane\Grace\20120214\_iTRAQ\_1.raw]

Data File:

**Monoisotopic mass of neutral peptide Mr(calc): 1553.835**

**Variable modifications:**

**K11** iTRAQ4plex (K)

**Ions Score: 76.68 Expect: 0.000**

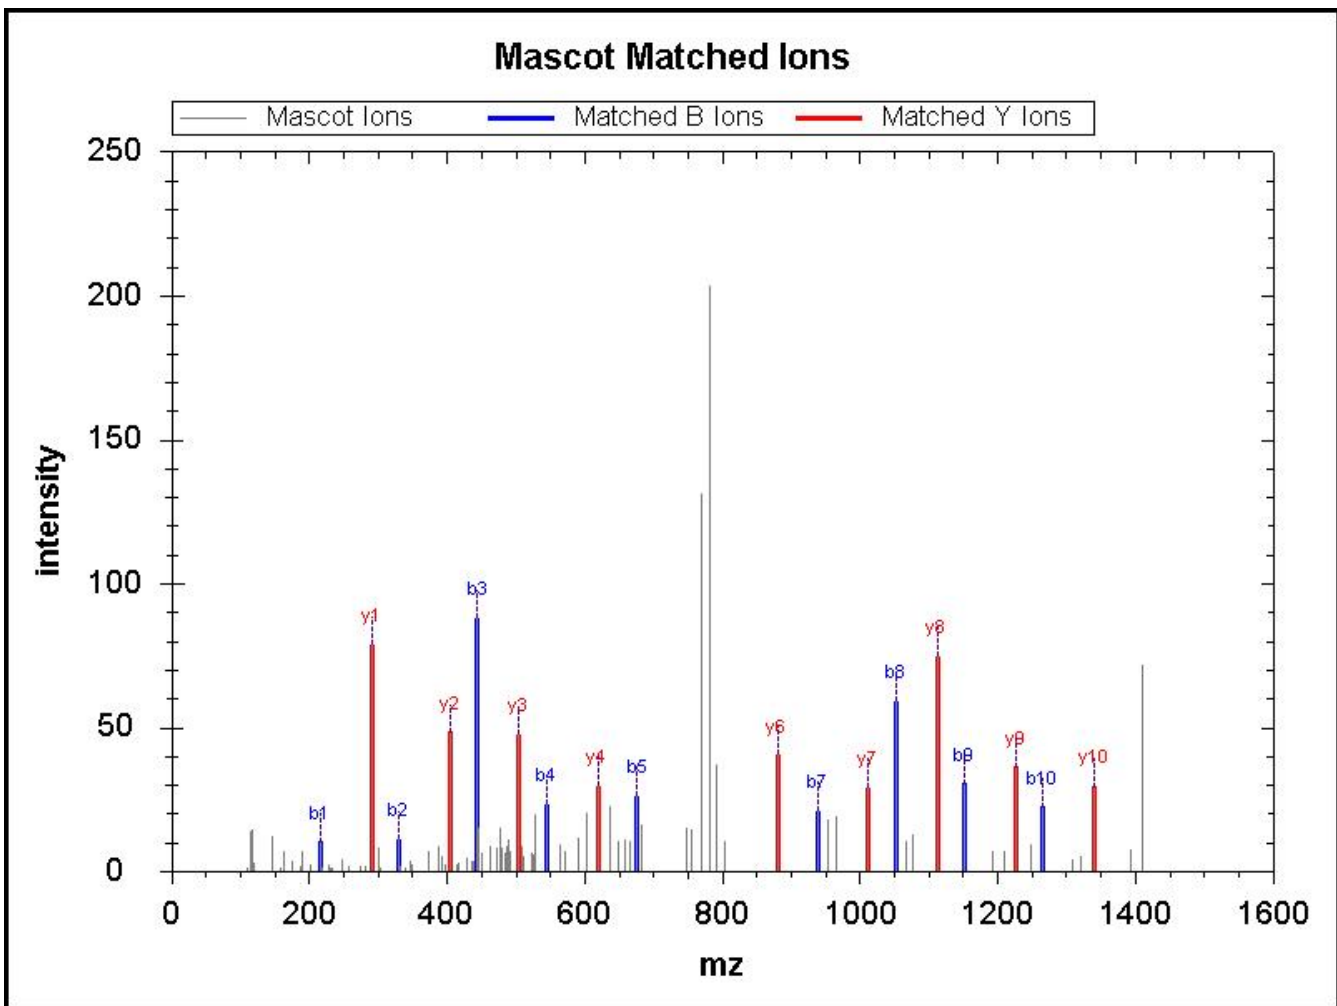

| No | b        | b++    | b*       | b*++   | b0       | b0++   | Seq | y        | y++    | y*       | y*++   | y0       | y0++   | RevNo |
|----|----------|--------|----------|--------|----------|--------|-----|----------|--------|----------|--------|----------|--------|-------|
| 1  | 216.15   | 108.58 |          |        |          |        | A   |          |        |          |        |          |        | 11    |
| 2  | 329.23   | 165.12 |          |        |          |        | L   | 1,339.70 | 670.36 | 1,322.68 | 661.84 | 1,321.69 | 661.35 | 10    |
| 3  | 444.26   | 222.63 |          |        | 426.25   | 213.63 | D   | 1,226.62 | 613.81 | 1,209.59 | 605.30 | 1,208.61 | 604.81 | 9     |
| 4  | 545.31   | 273.16 |          |        | 527.29   | 264.15 | T   | 1,111.59 | 556.30 | 1,094.57 | 547.79 | 1,093.58 | 547.30 | 8     |
| 5  | 676.35   | 338.68 |          |        | 658.34   | 329.67 | M   | 1,010.55 | 505.78 | 993.52   | 497.26 | 992.54   | 496.77 | 7     |
| 6  | 790.39   | 395.70 | 773.36   | 387.18 | 772.38   | 386.69 | N   | 879.51   | 440.26 | 862.48   | 431.74 | 861.49   | 431.25 | 6     |
| 7  | 937.46   | 469.23 | 920.43   | 460.72 | 919.45   | 460.23 | F   | 765.46   | 383.23 | 748.44   | 374.72 | 747.45   | 374.23 | 5     |
| 8  | 1,052.48 | 526.75 | 1,035.46 | 518.23 | 1,034.47 | 517.74 | D   | 618.39   | 309.70 | 601.37   | 301.19 | 600.38   | 300.70 | 4     |
| 9  | 1,151.55 | 576.28 | 1,134.53 | 567.77 | 1,133.54 | 567.27 | V   | 503.37   | 252.19 | 486.34   | 243.67 |          |        | 3     |

|    |          |        |          |        |          |        |   |        |        |        |        |  |  |   |
|----|----------|--------|----------|--------|----------|--------|---|--------|--------|--------|--------|--|--|---|
| 10 | 1,264.64 | 632.82 | 1,247.61 | 624.31 | 1,246.63 | 623.82 | I | 404.30 | 202.65 | 387.27 | 194.14 |  |  | 2 |
| 11 |          |        |          |        |          |        | K | 291.21 | 146.11 | 274.19 | 137.60 |  |  | 1 |

Query 2302 Hit 1

MS/MS Fragmentation of **VTDPVGDIVSEFMHSFEEK**

Found in **sp|Q96CS3|FAF2\_HUMAN**, FAS-associated factor 2 OS=Homo sapiens GN=FAF2 PE=1 SV=2

Match to Query 2302: 2324.16from(775.7274,3+)

Title: 1182: Sum of 2 scans in range 2950 (rt=74.6464, f=4, i=804) to 2951 (rt=74.6718, f=4, i=805)

[D:\lab212\membrane\Grace\20120214\_iTRAQ\_1.raw]

Data File:

**Monoisotopic mass of neutral peptide Mr(calc): 2324.16**

**Variable modifications:**

**K18** iTRAQ4plex (K)

**Ions Score: 82.57 Expect: 0.000**

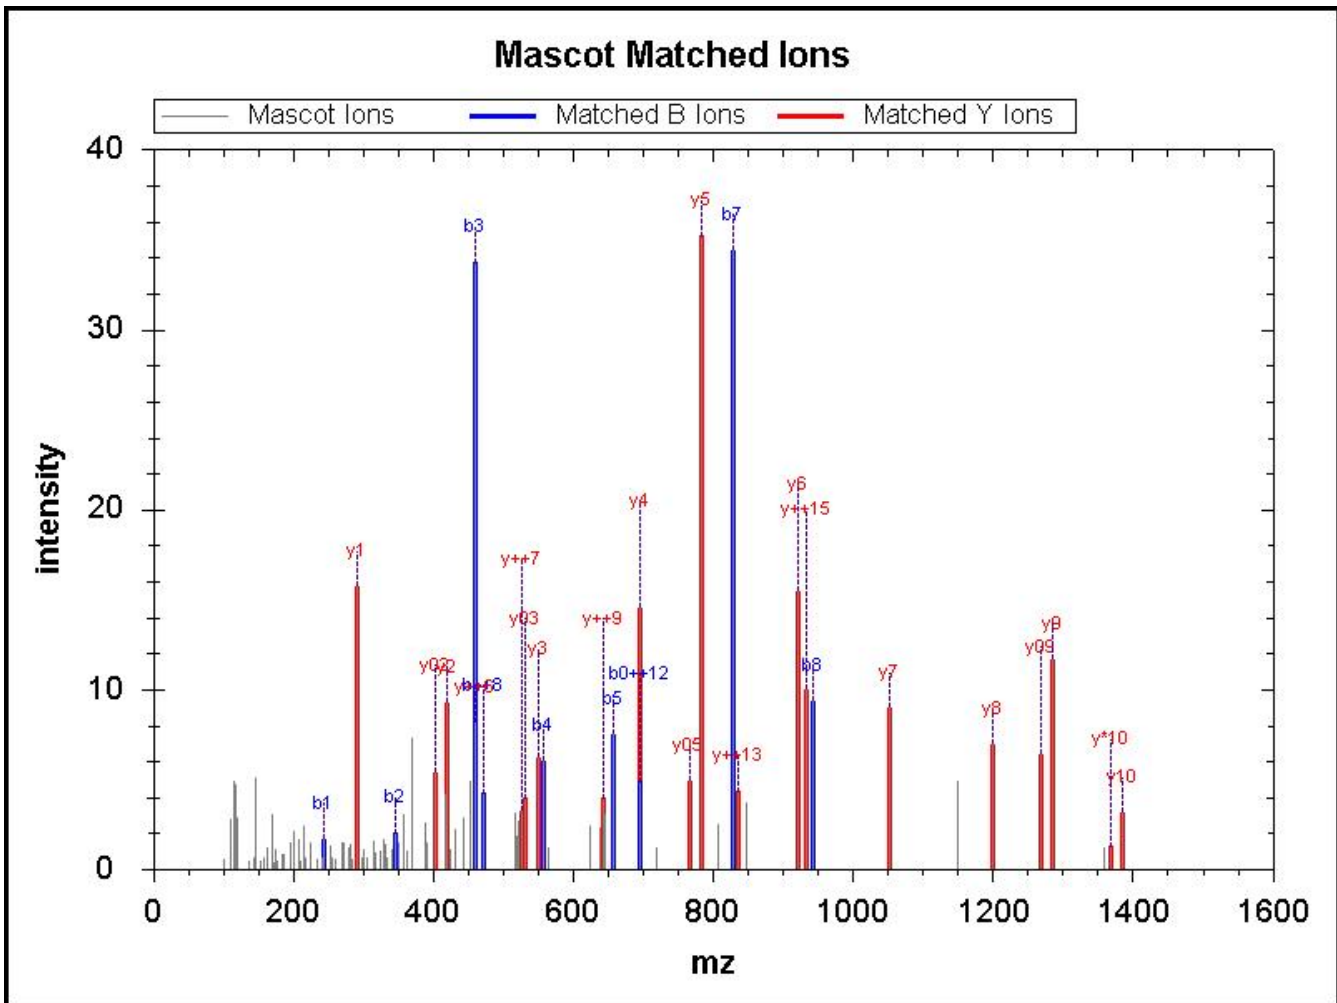

| No | b        | b++    | b0       | b0++   | Seq | y        | y++      | y*       | y*++     | y0       | y0++     | RevNo |
|----|----------|--------|----------|--------|-----|----------|----------|----------|----------|----------|----------|-------|
| 1  | 244.18   | 122.59 |          |        | V   |          |          |          |          |          |          | 18    |
| 2  | 345.23   | 173.12 | 327.21   | 164.11 | T   | 2,082.00 | 1,041.50 | 2,064.97 | 1,032.99 | 2,063.99 | 1,032.50 | 17    |
| 3  | 460.25   | 230.63 | 442.24   | 221.62 | D   | 1,980.95 | 990.98   | 1,963.92 | 982.47   | 1,962.94 | 981.97   | 16    |
| 4  | 557.31   | 279.16 | 539.29   | 270.15 | P   | 1,865.92 | 933.46   | 1,848.90 | 924.95   | 1,847.91 | 924.46   | 15    |
| 5  | 656.37   | 328.69 | 638.36   | 319.69 | V   | 1,768.87 | 884.94   | 1,751.84 | 876.43   | 1,750.86 | 875.93   | 14    |
| 6  | 713.40   | 357.20 | 695.38   | 348.20 | G   | 1,669.80 | 835.40   | 1,652.77 | 826.89   | 1,651.79 | 826.40   | 13    |
| 7  | 828.42   | 414.71 | 810.41   | 405.71 | D   | 1,612.78 | 806.89   | 1,595.75 | 798.38   | 1,594.77 | 797.89   | 12    |
| 8  | 941.51   | 471.26 | 923.50   | 462.25 | I   | 1,497.75 | 749.38   | 1,480.73 | 740.87   | 1,479.74 | 740.37   | 11    |
| 9  | 1,040.57 | 520.79 | 1,022.56 | 511.79 | V   | 1,384.67 | 692.84   | 1,367.64 | 684.32   | 1,366.66 | 683.83   | 10    |
| 10 | 1,127.61 | 564.31 | 1,109.60 | 555.30 | S   | 1,285.60 | 643.30   | 1,268.57 | 634.79   | 1,267.59 | 634.30   | 9     |
| 11 | 1,274.67 | 637.84 | 1,256.66 | 628.84 | F   | 1,198.57 | 599.79   | 1,181.54 | 591.27   | 1,180.56 | 590.78   | 8     |



|    |          |          |          |          |   |          |        |          |        |          |        |   |
|----|----------|----------|----------|----------|---|----------|--------|----------|--------|----------|--------|---|
| 12 | 1,405.72 | 703.36   | 1,387.70 | 694.36   | M | 1,051.50 | 526.25 | 1,034.47 | 517.74 | 1,033.49 | 517.25 | 7 |
| 13 | 1,542.77 | 771.89   | 1,524.76 | 762.89   | H | 920.46   | 460.73 | 903.43   | 452.22 | 902.45   | 451.73 | 6 |
| 14 | 1,629.81 | 815.41   | 1,611.80 | 806.40   | S | 783.40   | 392.20 | 766.37   | 383.69 | 765.39   | 383.20 | 5 |
| 15 | 1,776.87 | 888.94   | 1,758.86 | 879.94   | F | 696.37   | 348.69 | 679.34   | 340.17 | 678.36   | 339.68 | 4 |
| 16 | 1,905.92 | 953.46   | 1,887.91 | 944.46   | E | 549.30   | 275.15 | 532.27   | 266.64 | 531.29   | 266.15 | 3 |
| 17 | 2,034.96 | 1,017.98 | 2,016.95 | 1,008.98 | E | 420.26   | 210.63 | 403.23   | 202.12 | 402.25   | 201.63 | 2 |
| 18 |          |          |          |          | K | 291.21   | 146.11 | 274.19   | 137.60 |          |        | 1 |

Query 2454 Hit 1

MS/MS Fragmentation of **ILLELLNQMDGFDQNVVK**

Found in **sp|P43686|PRS6B\_HUMAN**, 26S protease regulatory subunit 6B OS=Homo sapiens GN=PSMC4 PE=1 SV=2

Match to Query 2454: 2490.334from(831.1185,3+)

Title: 1257: Sum of 2 scans in range 3117 (rt=78.4109, f=4, i=858) to 3118 (rt=78.4363, f=4, i=859)

[D:\lab212\membrane\Grace\20120214\_iTRAQ\_1.raw]

Data File:

**Monoisotopic mass of neutral peptide Mr(calc): 2490.334**

**Variable modifications:**

**K19** iTRAQ4plex (K)

**Ions Score: 82.92 Expect: 0.000**

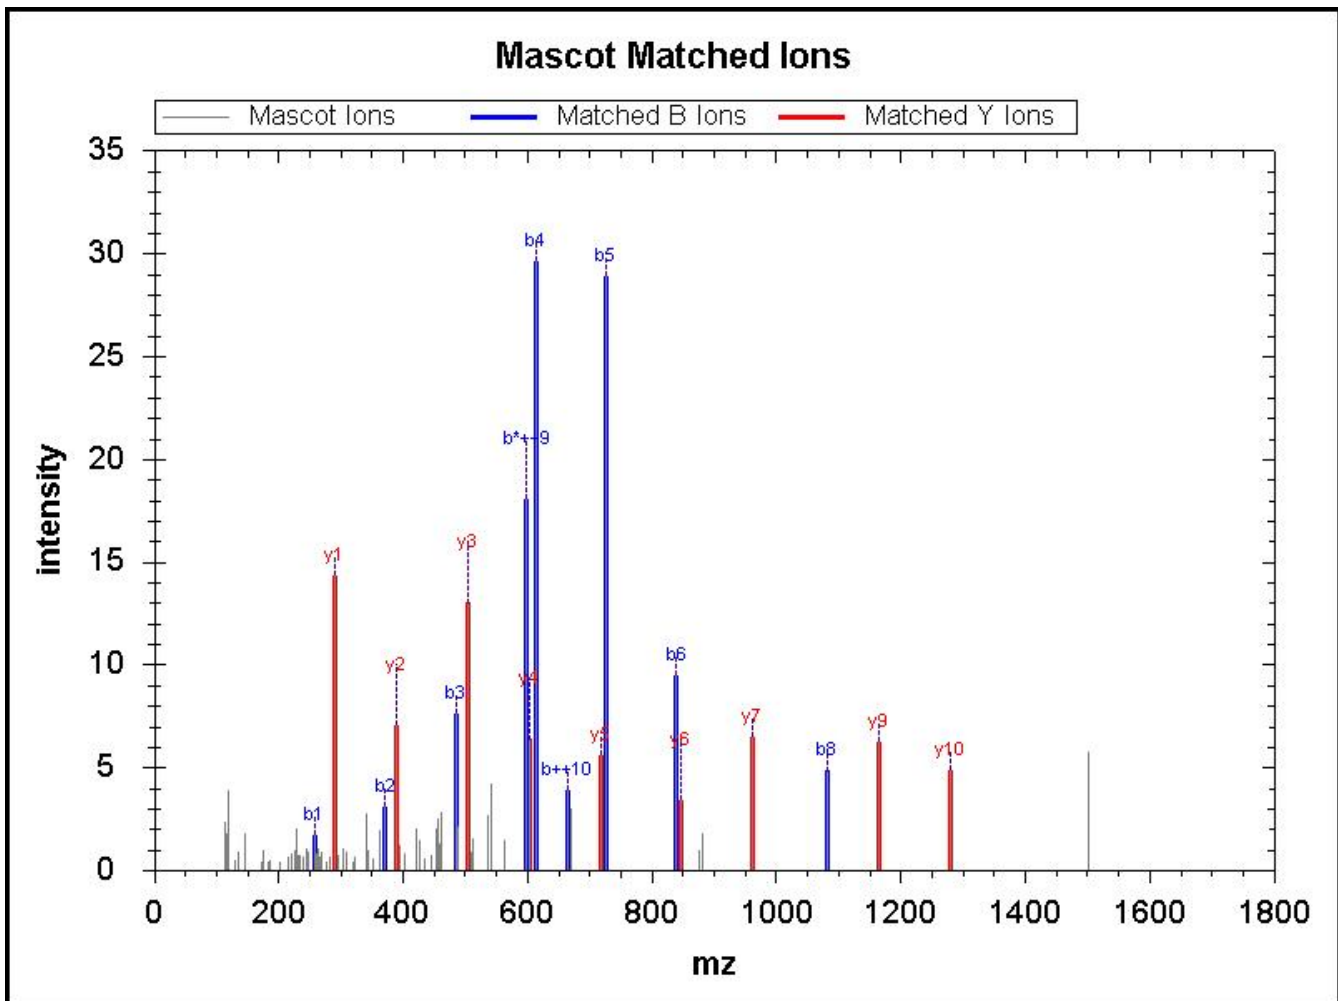

| No | b      | b++    | b* | b*** | b0     | b0++   | Seq | y        | y++      | y*       | y***     | y0       | y0++     | RevNo |
|----|--------|--------|----|------|--------|--------|-----|----------|----------|----------|----------|----------|----------|-------|
| 1  | 258.19 | 129.60 |    |      |        |        | I   |          |          |          |          |          |          | 19    |
| 2  | 371.28 | 186.14 |    |      |        |        | L   | 2,234.16 | 1,117.58 | 2,217.13 | 1,109.07 | 2,216.15 | 1,108.58 | 18    |
| 3  | 484.36 | 242.68 |    |      |        |        | L   | 2,121.08 | 1,061.04 | 2,104.05 | 1,052.53 | 2,103.07 | 1,052.04 | 17    |
| 4  | 613.40 | 307.21 |    |      | 595.39 | 298.20 | E   | 2,007.99 | 1,004.50 | 1,990.97 | 995.99   | 1,989.98 | 995.49   | 16    |
| 5  | 726.49 | 363.75 |    |      | 708.48 | 354.74 | L   | 1,878.95 | 939.98   | 1,861.92 | 931.47   | 1,860.94 | 930.97   | 15    |
| 6  | 839.57 | 420.29 |    |      | 821.56 | 411.28 | L   | 1,765.87 | 883.44   | 1,748.84 | 874.92   | 1,747.86 | 874.43   | 14    |

|    |          |          |          |          |          |          |   |          |        |          |        |          |        |    |
|----|----------|----------|----------|----------|----------|----------|---|----------|--------|----------|--------|----------|--------|----|
| 7  | 953.62   | 477.31   | 936.59   | 468.80   | 935.60   | 468.31   | N | 1,652.78 | 826.89 | 1,635.76 | 818.38 | 1,634.77 | 817.89 | 13 |
| 8  | 1,081.67 | 541.34   | 1,064.65 | 532.83   | 1,063.66 | 532.34   | Q | 1,538.74 | 769.87 | 1,521.71 | 761.36 | 1,520.73 | 760.87 | 12 |
| 9  | 1,212.71 | 606.86   | 1,195.69 | 598.35   | 1,194.70 | 597.86   | M | 1,410.68 | 705.84 | 1,393.65 | 697.33 | 1,392.67 | 696.84 | 11 |
| 10 | 1,327.74 | 664.37   | 1,310.71 | 655.86   | 1,309.73 | 655.37   | D | 1,279.64 | 640.32 | 1,262.61 | 631.81 | 1,261.63 | 631.32 | 10 |
| 11 | 1,384.76 | 692.89   | 1,367.74 | 684.37   | 1,366.75 | 683.88   | G | 1,164.61 | 582.81 | 1,147.59 | 574.30 | 1,146.60 | 573.80 | 9  |
| 12 | 1,531.83 | 766.42   | 1,514.80 | 757.91   | 1,513.82 | 757.41   | F | 1,107.59 | 554.30 | 1,090.56 | 545.79 | 1,089.58 | 545.29 | 8  |
| 13 | 1,646.86 | 823.93   | 1,629.83 | 815.42   | 1,628.85 | 814.93   | D | 960.52   | 480.77 | 943.50   | 472.25 | 942.51   | 471.76 | 7  |
| 14 | 1,774.92 | 887.96   | 1,757.89 | 879.45   | 1,756.91 | 878.96   | Q | 845.50   | 423.25 | 828.47   | 414.74 |          |        | 6  |
| 15 | 1,888.96 | 944.98   | 1,871.93 | 936.47   | 1,870.95 | 935.98   | N | 717.44   | 359.22 | 700.41   | 350.71 |          |        | 5  |
| 16 | 1,988.03 | 994.52   | 1,971.00 | 986.00   | 1,970.02 | 985.51   | V | 603.39   | 302.20 | 586.37   | 293.69 |          |        | 4  |
| 17 | 2,102.07 | 1,051.54 | 2,085.04 | 1,043.03 | 2,084.06 | 1,042.53 | N | 504.33   | 252.67 | 487.30   | 244.15 |          |        | 3  |
| 18 | 2,201.14 | 1,101.07 | 2,184.11 | 1,092.56 | 2,183.13 | 1,092.07 | V | 390.28   | 195.65 | 373.26   | 187.13 |          |        | 2  |
| 19 |          |          |          |          |          |          | K | 291.21   | 146.11 | 274.19   | 137.60 |          |        | 1  |

Query 847 Hit 1

MS/MS Fragmentation of **STESLQANVQR**

Found in **sp|P26373|RL13\_HUMAN**, 60S ribosomal protein L13 OS=Homo sapiens GN=RPL13 PE=1 SV=4

Match to Query 847: 1375.719from(688.8668,2+)

Title: 183: Sum of 2 scans in range 860 (rt=27.5545, f=4, i=130) to 861 (rt=27.5799, f=4, i=131)

[D:\lab212\membrane\Grace\20120214\_iTRAQ\_1.raw]

Data File:

**Monoisotopic mass of neutral peptide Mr(calc):** 1375.719

**Variable modifications:**

**Ions Score:** 83.23 **Expect:** 0.000

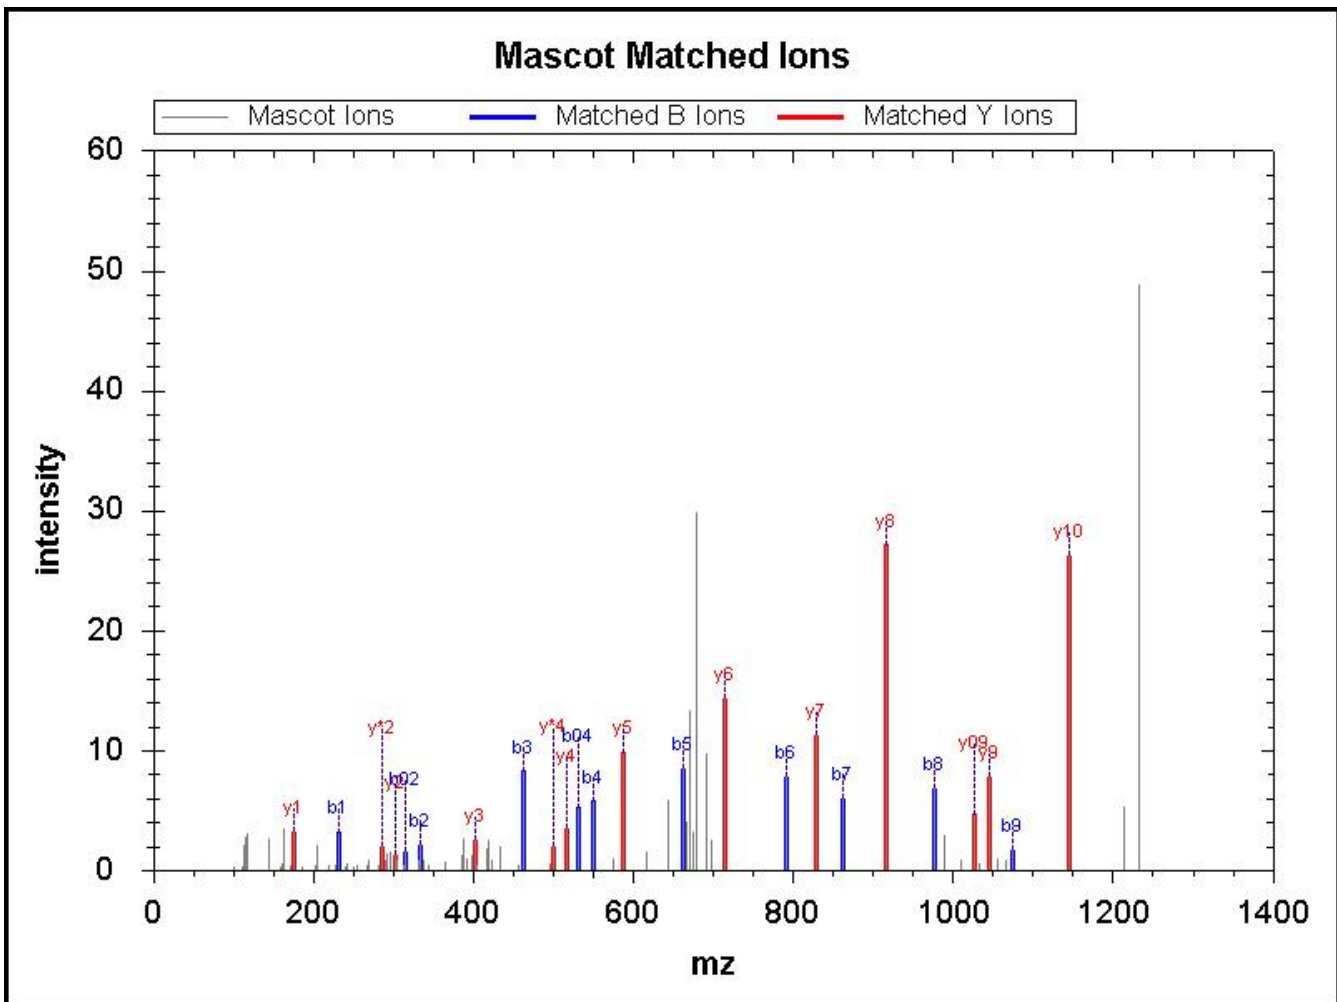

| No | b      | b++    | b* | b*++ | b0     | b0++   | Seq | y | y++ | y* | y*++ | y0 | y0++ | RevNo |
|----|--------|--------|----|------|--------|--------|-----|---|-----|----|------|----|------|-------|
| 1  | 232.14 | 116.57 |    |      | 214.13 | 107.57 | S   |   |     |    |      |    |      | 11    |

|    |          |        |          |        |          |        |   |          |        |          |        |          |        |    |
|----|----------|--------|----------|--------|----------|--------|---|----------|--------|----------|--------|----------|--------|----|
| 2  | 333.19   | 167.10 |          |        | 315.18   | 158.09 | T | 1,145.59 | 573.30 | 1,128.56 | 564.79 | 1,127.58 | 564.29 | 10 |
| 3  | 462.23   | 231.62 |          |        | 444.22   | 222.61 | E | 1,044.54 | 522.78 | 1,027.52 | 514.26 | 1,026.53 | 513.77 | 9  |
| 4  | 549.26   | 275.14 |          |        | 531.25   | 266.13 | S | 915.50   | 458.25 | 898.47   | 449.74 | 897.49   | 449.25 | 8  |
| 5  | 662.35   | 331.68 |          |        | 644.34   | 322.67 | L | 828.47   | 414.74 | 811.44   | 406.22 |          |        | 7  |
| 6  | 790.41   | 395.71 | 773.38   | 387.19 | 772.40   | 386.70 | Q | 715.38   | 358.20 | 698.36   | 349.68 |          |        | 6  |
| 7  | 861.44   | 431.23 | 844.42   | 422.71 | 843.43   | 422.22 | A | 587.33   | 294.17 | 570.30   | 285.65 |          |        | 5  |
| 8  | 975.49   | 488.25 | 958.46   | 479.73 | 957.48   | 479.24 | N | 516.29   | 258.65 | 499.26   | 250.13 |          |        | 4  |
| 9  | 1,074.55 | 537.78 | 1,057.53 | 529.27 | 1,056.54 | 528.78 | V | 402.25   | 201.63 | 385.22   | 193.11 |          |        | 3  |
| 10 | 1,202.61 | 601.81 | 1,185.59 | 593.30 | 1,184.60 | 592.81 | Q | 303.18   | 152.09 | 286.15   | 143.58 |          |        | 2  |
| 11 |          |        |          |        |          |        | R | 175.12   | 88.06  | 158.09   | 79.55  |          |        | 1  |

Query 1334 Hit 1

MS/MS Fragmentation of **LLSSFDFFLTDAR**

Found in **sp|O76021|RL1D1\_HUMAN**, Ribosomal L1 domain-containing protein 1 OS=Homo sapiens GN=RSL1D1 PE=1 SV=3

Match to Query 1334: 1674.875from(838.4446,2+)

Title: 1166: Scan 2874 (rt=73.017, f=3, i=418) [D:\lab212\membrane\Grace\20120214\_iTRAQ\_2.raw]

Data File:

**Monoisotopic mass of neutral peptide Mr(calc): 1674.875**

**Variable modifications:**

**Ions Score: 83.44 Expect: 0.000**

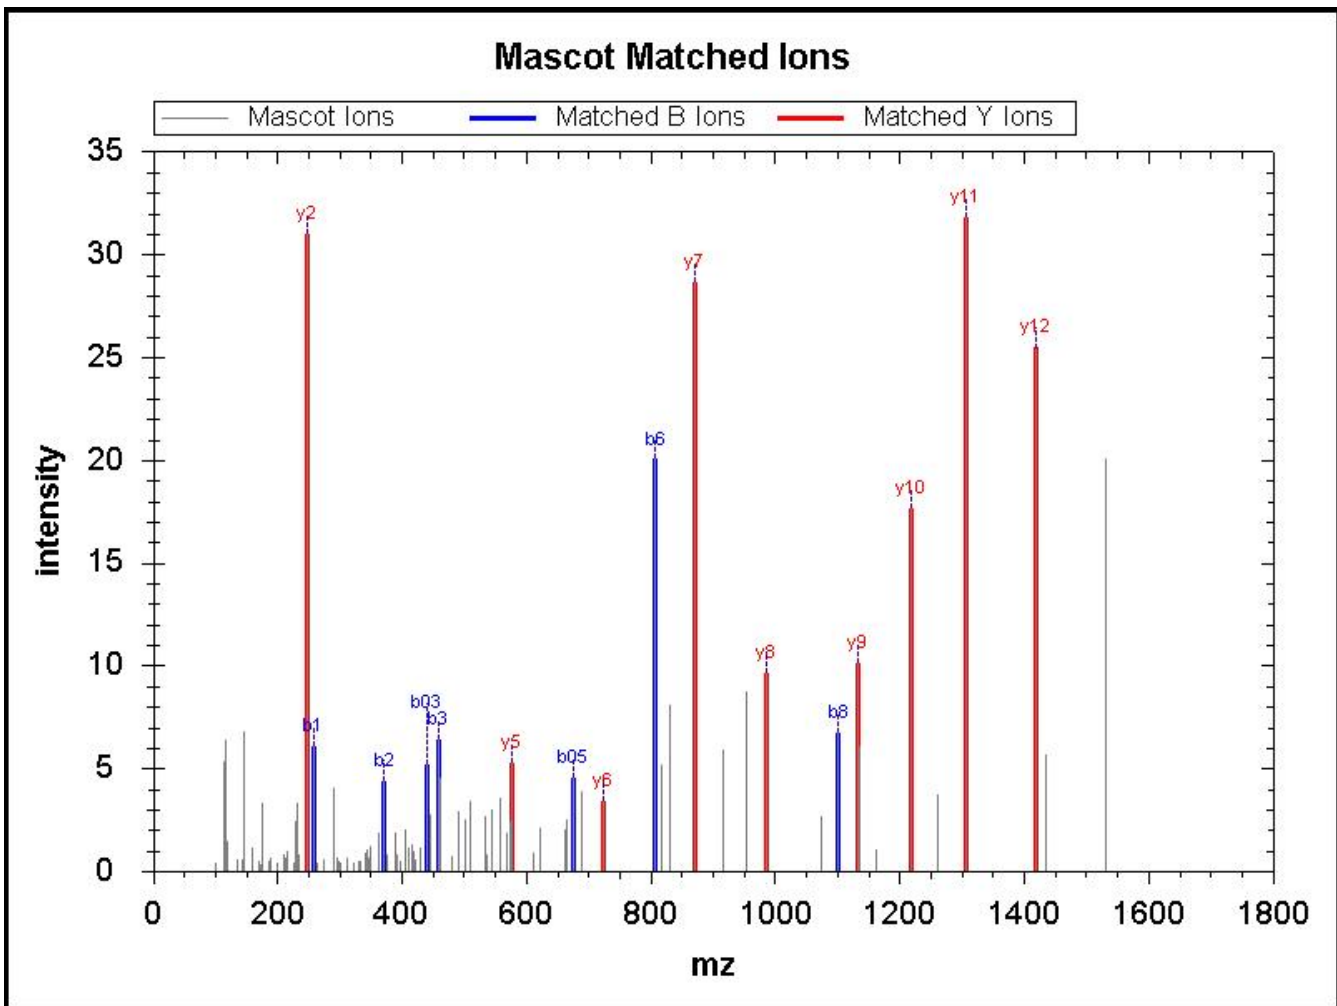

| No | b      | b++    | b0     | b0++   | Seq | y        | y++    | y*       | y*++   | y0       | y0++   | RevNo |
|----|--------|--------|--------|--------|-----|----------|--------|----------|--------|----------|--------|-------|
| 1  | 258.19 | 129.60 |        |        | L   |          |        |          |        |          |        | 13    |
| 2  | 371.28 | 186.14 |        |        | L   | 1,418.69 | 709.85 | 1,401.67 | 701.34 | 1,400.68 | 700.85 | 12    |
| 3  | 458.31 | 229.66 | 440.30 | 220.65 | S   | 1,305.61 | 653.31 | 1,288.58 | 644.80 | 1,287.60 | 644.30 | 11    |
| 4  | 545.34 | 273.17 | 527.33 | 264.17 | S   | 1,218.58 | 609.79 | 1,201.55 | 601.28 | 1,200.57 | 600.79 | 10    |
| 5  | 692.41 | 346.71 | 674.40 | 337.70 | F   | 1,131.55 | 566.28 | 1,114.52 | 557.76 | 1,113.54 | 557.27 | 9     |

|    |          |        |          |        |   |        |        |        |        |        |        |   |
|----|----------|--------|----------|--------|---|--------|--------|--------|--------|--------|--------|---|
| 6  | 807.44   | 404.22 | 789.43   | 395.22 | D | 984.48 | 492.74 | 967.45 | 484.23 | 966.47 | 483.74 | 8 |
| 7  | 954.51   | 477.76 | 936.49   | 468.75 | F | 869.45 | 435.23 | 852.42 | 426.72 | 851.44 | 426.22 | 7 |
| 8  | 1,101.57 | 551.29 | 1,083.56 | 542.29 | F | 722.38 | 361.70 | 705.36 | 353.18 | 704.37 | 352.69 | 6 |
| 9  | 1,214.66 | 607.83 | 1,196.65 | 598.83 | L | 575.31 | 288.16 | 558.29 | 279.65 | 557.30 | 279.16 | 5 |
| 10 | 1,315.71 | 658.36 | 1,297.69 | 649.35 | T | 462.23 | 231.62 | 445.20 | 223.11 | 444.22 | 222.61 | 4 |
| 11 | 1,430.73 | 715.87 | 1,412.72 | 706.86 | D | 361.18 | 181.10 | 344.16 | 172.58 | 343.17 | 172.09 | 3 |
| 12 | 1,501.77 | 751.39 | 1,483.76 | 742.38 | A | 246.16 | 123.58 | 229.13 | 115.07 |        |        | 2 |
| 13 |          |        |          |        | R | 175.12 | 88.06  | 158.09 | 79.55  |        |        | 1 |

Query 2799 Hit 1

MS/MS Fragmentation of **LLVSNLDFGVSDADIQELFAEFGTLK**

Found in **sp|Q86V81|THOC4\_HUMAN**, THO complex subunit 4 OS=Homo sapiens GN=ALYREF PE=1 SV=3

Match to Query 2799: 3128.645 from (1043.889, 3+)

Title: 1374: Sum of 2 scans in range 3384 (rt=84.4262, f=4, i=944) to 3385 (rt=84.4516, f=4, i=945)

[D:\lab212\membrane\Grace20120214\_iTRAQ\_1.raw]

Data File:

**Monoisotopic mass of neutral peptide Mr(calc): 3128.645**

**Variable modifications:**

**K26 iTRAQ4plex (K)**

**Ions Score: 90.52 Expect: 0.000**

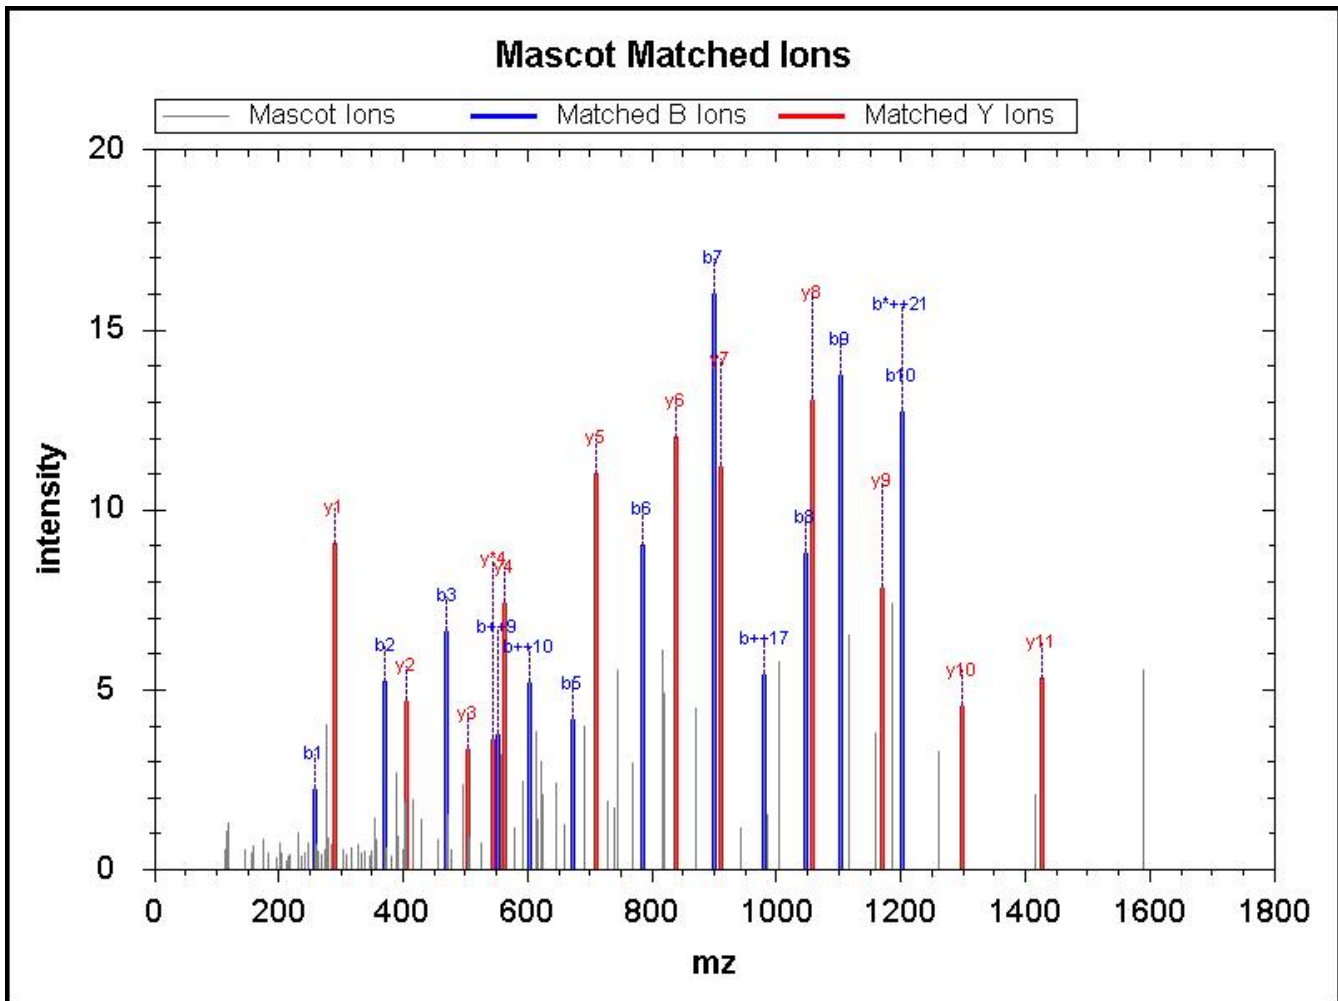

|    |          |          |          |          |          |          |   |          |          |          |          |          |          |    |
|----|----------|----------|----------|----------|----------|----------|---|----------|----------|----------|----------|----------|----------|----|
| 6  | 784.50   | 392.76   | 767.48   | 384.24   | 766.49   | 383.75   | L | 2,459.25 | 1,230.13 | 2,442.22 | 1,221.61 | 2,441.24 | 1,221.12 | 21 |
| 7  | 899.53   | 450.27   | 882.51   | 441.76   | 881.52   | 441.26   | D | 2,346.16 | 1,173.58 | 2,329.14 | 1,165.07 | 2,328.15 | 1,164.58 | 20 |
| 8  | 1,046.60 | 523.80   | 1,029.57 | 515.29   | 1,028.59 | 514.80   | F | 2,231.14 | 1,116.07 | 2,214.11 | 1,107.56 | 2,213.12 | 1,107.07 | 19 |
| 9  | 1,103.62 | 552.31   | 1,086.60 | 543.80   | 1,085.61 | 543.31   | G | 2,084.07 | 1,042.54 | 2,067.04 | 1,034.02 | 2,066.06 | 1,033.53 | 18 |
| 10 | 1,202.69 | 601.85   | 1,185.66 | 593.34   | 1,184.68 | 592.84   | V | 2,027.05 | 1,014.03 | 2,010.02 | 1,005.51 | 2,009.03 | 1,005.02 | 17 |
| 11 | 1,289.72 | 645.36   | 1,272.70 | 636.85   | 1,271.71 | 636.36   | S | 1,927.98 | 964.49   | 1,910.95 | 955.98   | 1,909.97 | 955.49   | 16 |
| 12 | 1,404.75 | 702.88   | 1,387.72 | 694.36   | 1,386.74 | 693.87   | D | 1,840.95 | 920.98   | 1,823.92 | 912.46   | 1,822.93 | 911.97   | 15 |
| 13 | 1,475.79 | 738.40   | 1,458.76 | 729.88   | 1,457.78 | 729.39   | A | 1,725.92 | 863.46   | 1,708.89 | 854.95   | 1,707.91 | 854.46   | 14 |
| 14 | 1,590.81 | 795.91   | 1,573.79 | 787.40   | 1,572.80 | 786.90   | D | 1,654.88 | 827.94   | 1,637.85 | 819.43   | 1,636.87 | 818.94   | 13 |
| 15 | 1,703.90 | 852.45   | 1,686.87 | 843.94   | 1,685.89 | 843.45   | I | 1,539.85 | 770.43   | 1,522.83 | 761.92   | 1,521.84 | 761.43   | 12 |
| 16 | 1,831.96 | 916.48   | 1,814.93 | 907.97   | 1,813.95 | 907.48   | Q | 1,426.77 | 713.89   | 1,409.74 | 705.38   | 1,408.76 | 704.88   | 11 |
| 17 | 1,961.00 | 981.00   | 1,943.97 | 972.49   | 1,942.99 | 972.00   | E | 1,298.71 | 649.86   | 1,281.68 | 641.35   | 1,280.70 | 640.85   | 10 |
| 18 | 2,074.08 | 1,037.54 | 2,057.06 | 1,029.03 | 2,056.07 | 1,028.54 | L | 1,169.67 | 585.34   | 1,152.64 | 576.82   | 1,151.66 | 576.33   | 9  |
| 19 | 2,221.15 | 1,111.08 | 2,204.12 | 1,102.57 | 2,203.14 | 1,102.07 | F | 1,056.58 | 528.80   | 1,039.56 | 520.28   | 1,038.57 | 519.79   | 8  |
| 20 | 2,292.19 | 1,146.60 | 2,275.16 | 1,138.08 | 2,274.18 | 1,137.59 | A | 909.52   | 455.26   | 892.49   | 446.75   | 891.51   | 446.26   | 7  |
| 21 | 2,421.23 | 1,211.12 | 2,404.20 | 1,202.61 | 2,403.22 | 1,202.11 | E | 838.48   | 419.74   | 821.45   | 411.23   | 820.47   | 410.74   | 6  |
| 22 | 2,568.30 | 1,284.65 | 2,551.27 | 1,276.14 | 2,550.29 | 1,275.65 | F | 709.44   | 355.22   | 692.41   | 346.71   | 691.43   | 346.22   | 5  |
| 23 | 2,625.32 | 1,313.16 | 2,608.29 | 1,304.65 | 2,607.31 | 1,304.16 | G | 562.37   | 281.69   | 545.34   | 273.17   | 544.36   | 272.68   | 4  |
| 24 | 2,726.37 | 1,363.69 | 2,709.34 | 1,355.17 | 2,708.36 | 1,354.68 | T | 505.35   | 253.18   | 488.32   | 244.66   | 487.34   | 244.17   | 3  |
| 25 | 2,839.45 | 1,420.23 | 2,822.43 | 1,411.72 | 2,821.44 | 1,411.22 | L | 404.30   | 202.65   | 387.27   | 194.14   |          |          | 2  |
| 26 |          |          |          |          |          |          | K | 291.21   | 146.11   | 274.19   | 137.60   |          |          | 1  |

Query 2733 Hit 1

MS/MS Fragmentation of **SMAGNIIPAIATTNAVIAGLIVLEGLK**

Found in **sp|Q9UBT2|SAE2\_HUMAN**, SUMO-activating enzyme subunit 2 OS=Homo sapiens GN=UBA2 PE=1 SV=2

Match to Query 2733: 2937.707from(980.243,3+)

Title: 1474: Sum of 2 scans in range 3818 (rt=93.6581, f=2, i=637) to 3819 (rt=93.6835, f=2, i=638)

[D:\lab212\membrane\Grace\20120214\_iTRAQ\_1.raw]

Data File:

**Monoisotopic mass of neutral peptide Mr(calc): 2937.707**

**Variable modifications:**

**K27** iTRAQ4plex (K)

**Ions Score: 90.95 Expect: 0.000**

### Mascot Matched Ions

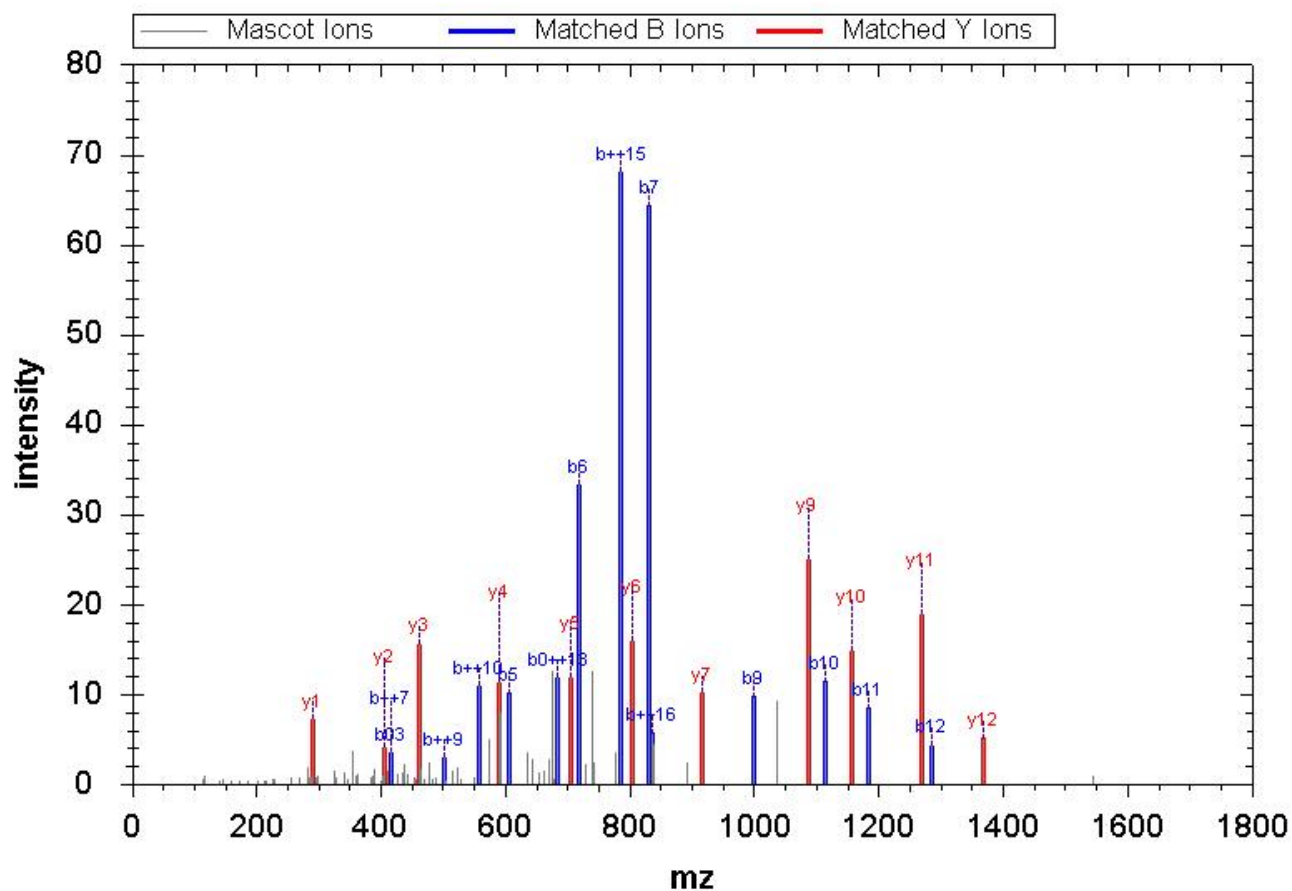

| No | b               | b++           | b*       | b*++     | b0            | b0++          | Seq | y               | y++      | y*       | y*++     | y0       | y0++     | RevNo |
|----|-----------------|---------------|----------|----------|---------------|---------------|-----|-----------------|----------|----------|----------|----------|----------|-------|
| 1  | 232.14          | 116.57        |          |          | 214.13        | 107.57        | S   |                 |          |          |          |          |          | 27    |
| 2  | 363.18          | 182.09        |          |          | 345.17        | 173.09        | M   | 2,707.59        | 1,354.30 | 2,690.56 | 1,345.79 | 2,689.58 | 1,345.29 | 26    |
| 3  | 434.22          | 217.61        |          |          | <b>416.21</b> | 208.61        | A   | 2,576.55        | 1,288.78 | 2,559.52 | 1,280.27 | 2,558.54 | 1,279.77 | 25    |
| 4  | 491.24          | 246.12        |          |          | 473.23        | 237.12        | G   | 2,505.51        | 1,253.26 | 2,488.49 | 1,244.75 | 2,487.50 | 1,244.26 | 24    |
| 5  | <b>605.28</b>   | 303.15        | 588.26   | 294.63   | 587.27        | 294.14        | N   | 2,448.49        | 1,224.75 | 2,431.47 | 1,216.24 | 2,430.48 | 1,215.74 | 23    |
| 6  | <b>718.37</b>   | 359.69        | 701.34   | 351.17   | 700.36        | 350.68        | I   | 2,334.45        | 1,167.73 | 2,317.42 | 1,159.21 | 2,316.44 | 1,158.72 | 22    |
| 7  | <b>831.45</b>   | <b>416.23</b> | 814.42   | 407.72   | 813.44        | 407.22        | I   | 2,221.37        | 1,111.19 | 2,204.34 | 1,102.67 | 2,203.35 | 1,102.18 | 21    |
| 8  | 928.50          | 464.76        | 911.48   | 456.24   | 910.49        | 455.75        | P   | 2,108.28        | 1,054.64 | 2,091.25 | 1,046.13 | 2,090.27 | 1,045.64 | 20    |
| 9  | <b>999.54</b>   | <b>500.27</b> | 982.51   | 491.76   | 981.53        | 491.27        | A   | 2,011.23        | 1,006.12 | 1,994.20 | 997.60   | 1,993.22 | 997.11   | 19    |
| 10 | <b>1,112.63</b> | <b>556.82</b> | 1,095.60 | 548.30   | 1,094.61      | 547.81        | I   | 1,940.19        | 970.60   | 1,923.16 | 962.09   | 1,922.18 | 961.59   | 18    |
| 11 | <b>1,183.66</b> | 592.33        | 1,166.64 | 583.82   | 1,165.65      | 583.33        | A   | 1,827.11        | 914.06   | 1,810.08 | 905.54   | 1,809.10 | 905.05   | 17    |
| 12 | <b>1,284.71</b> | 642.86        | 1,267.68 | 634.35   | 1,266.70      | 633.85        | T   | 1,756.07        | 878.54   | 1,739.04 | 870.03   | 1,738.06 | 869.53   | 16    |
| 13 | 1,385.76        | 693.38        | 1,368.73 | 684.87   | 1,367.75      | <b>684.38</b> | T   | 1,655.02        | 828.01   | 1,638.00 | 819.50   | 1,637.01 | 819.01   | 15    |
| 14 | 1,499.80        | 750.40        | 1,482.77 | 741.89   | 1,481.79      | 741.40        | N   | 1,553.97        | 777.49   | 1,536.95 | 768.98   | 1,535.96 | 768.49   | 14    |
| 15 | 1,570.84        | <b>785.92</b> | 1,553.81 | 777.41   | 1,552.83      | 776.92        | A   | 1,439.93        | 720.47   | 1,422.91 | 711.96   | 1,421.92 | 711.46   | 13    |
| 16 | 1,669.91        | <b>835.46</b> | 1,652.88 | 826.94   | 1,651.90      | 826.45        | V   | <b>1,368.89</b> | 684.95   | 1,351.87 | 676.44   | 1,350.88 | 675.95   | 12    |
| 17 | 1,782.99        | 892.00        | 1,765.96 | 883.49   | 1,764.98      | 882.99        | I   | <b>1,269.83</b> | 635.42   | 1,252.80 | 626.90   | 1,251.82 | 626.41   | 11    |
| 18 | 1,854.03        | 927.52        | 1,837.00 | 919.00   | 1,836.02      | 918.51        | A   | <b>1,156.74</b> | 578.87   | 1,139.72 | 570.36   | 1,138.73 | 569.87   | 10    |
| 19 | 1,911.05        | 956.03        | 1,894.02 | 947.52   | 1,893.04      | 947.02        | G   | <b>1,085.70</b> | 543.36   | 1,068.68 | 534.84   | 1,067.69 | 534.35   | 9     |
| 20 | 2,024.13        | 1,012.57      | 2,007.11 | 1,004.06 | 2,006.12      | 1,003.57      | L   | 1,028.68        | 514.85   | 1,011.66 | 506.33   | 1,010.67 | 505.84   | 8     |
| 21 | 2,137.22        | 1,069.11      | 2,120.19 | 1,060.60 | 2,119.21      | 1,060.11      | I   | <b>915.60</b>   | 458.30   | 898.57   | 449.79   | 897.59   | 449.30   | 7     |
| 22 | 2,236.29        | 1,118.65      | 2,219.26 | 1,110.13 | 2,218.28      | 1,109.64      | V   | <b>802.52</b>   | 401.76   | 785.49   | 393.25   | 784.50   | 392.76   | 6     |
| 23 | 2,349.37        | 1,175.19      | 2,332.34 | 1,166.68 | 2,331.36      | 1,166.18      | L   | <b>703.45</b>   | 352.23   | 686.42   | 343.71   | 685.44   | 343.22   | 5     |

|    |          |          |          |          |          |          |   |        |        |        |        |        |        |   |
|----|----------|----------|----------|----------|----------|----------|---|--------|--------|--------|--------|--------|--------|---|
| 24 | 2,478.41 | 1,239.71 | 2,461.39 | 1,231.20 | 2,460.40 | 1,230.70 | E | 590.36 | 295.69 | 573.34 | 287.17 | 572.35 | 286.68 | 4 |
| 25 | 2,535.43 | 1,268.22 | 2,518.41 | 1,259.71 | 2,517.42 | 1,259.22 | G | 461.32 | 231.16 | 444.29 | 222.65 |        |        | 3 |
| 26 | 2,648.52 | 1,324.76 | 2,631.49 | 1,316.25 | 2,630.51 | 1,315.76 | L | 404.30 | 202.65 | 387.27 | 194.14 |        |        | 2 |
| 27 |          |          |          |          |          |          | K | 291.21 | 146.11 | 274.19 | 137.60 |        |        | 1 |

Query 2513 Hit 1

MS/MS Fragmentation of **VVGFHVLGPNAGEVTQGF**AAALK

Found in **sp|Q16881|TRXR1\_HUMAN**, Thioredoxin reductase 1

Match to Query 2513: 2569.419from(857.4802,3+)

Title: 849: Scan 2210 (rt=58.0515, f=2, i=346) [D:\lab212\membrane\Grace\20120214\_iTRAQ\_2.raw]

Data File:

**Monoisotopic mass of neutral peptide Mr(calc): 2569.419**

**Variable modifications:**

**K23** iTRAQ4plex (K)

**Ions Score: 113.66 Expect: 0.000**

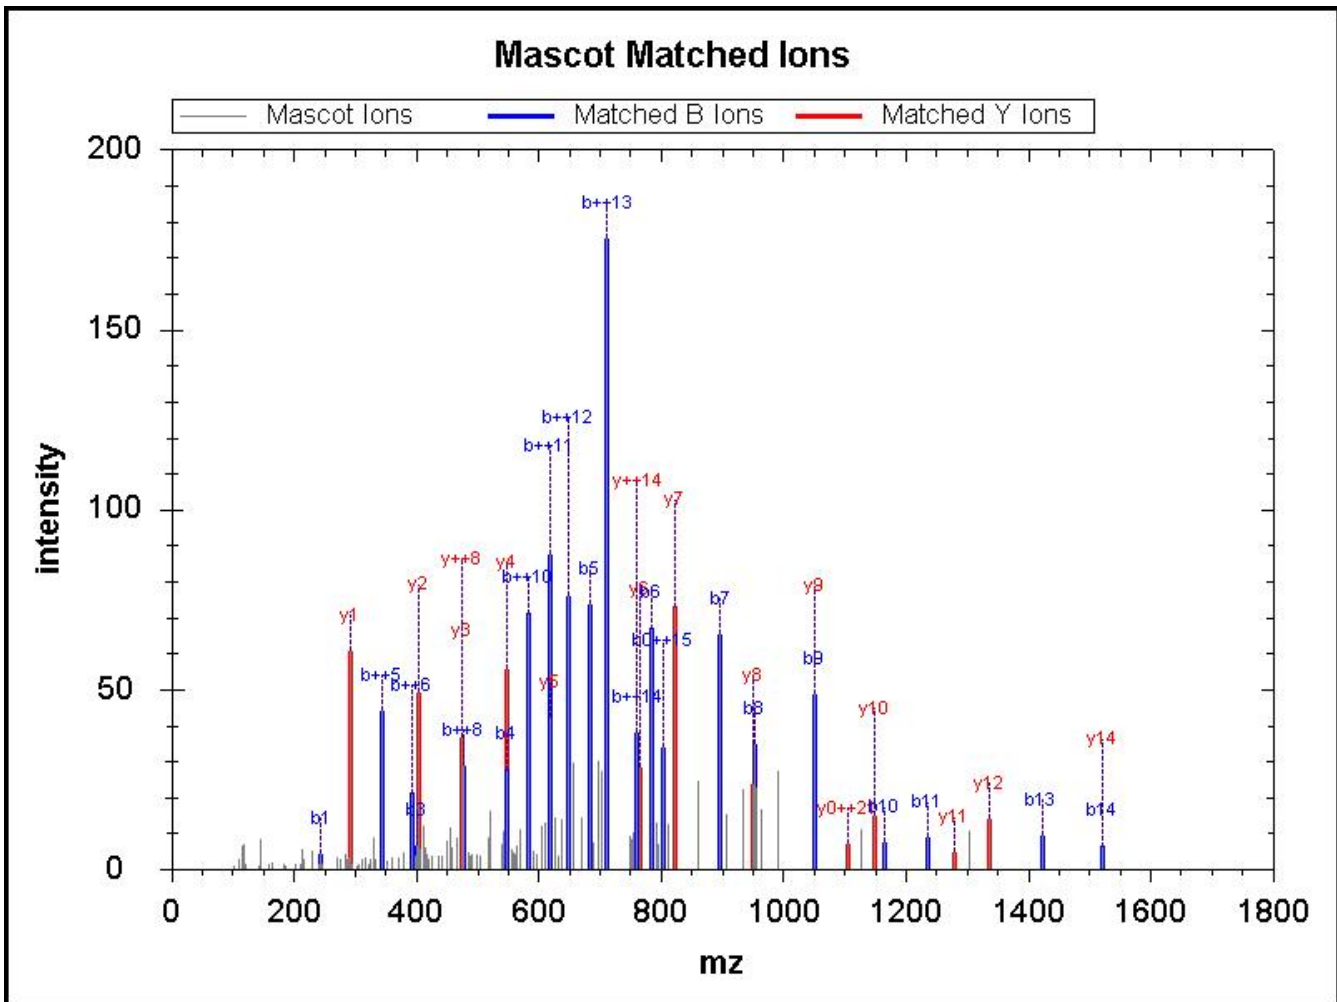

| No | b        | b++    | b* | b*++ | b0 | b0++ | Seq | y        | y++      | y*       | y*++     | y0       | y0++     | RevNo |
|----|----------|--------|----|------|----|------|-----|----------|----------|----------|----------|----------|----------|-------|
| 1  | 244.18   | 122.59 |    |      |    |      | V   |          |          |          |          |          |          | 23    |
| 2  | 343.25   | 172.13 |    |      |    |      | V   | 2,327.26 | 1,164.14 | 2,310.24 | 1,155.62 | 2,309.25 | 1,155.13 | 22    |
| 3  | 400.27   | 200.64 |    |      |    |      | G   | 2,228.19 | 1,114.60 | 2,211.17 | 1,106.09 | 2,210.18 | 1,105.60 | 21    |
| 4  | 547.34   | 274.17 |    |      |    |      | F   | 2,171.17 | 1,086.09 | 2,154.15 | 1,077.58 | 2,153.16 | 1,077.08 | 20    |
| 5  | 684.39   | 342.70 |    |      |    |      | H   | 2,024.10 | 1,012.56 | 2,007.08 | 1,004.04 | 2,006.09 | 1,003.55 | 19    |
| 6  | 783.46   | 392.24 |    |      |    |      | V   | 1,887.05 | 944.03   | 1,870.02 | 935.51   | 1,869.04 | 935.02   | 18    |
| 7  | 896.55   | 448.78 |    |      |    |      | L   | 1,787.98 | 894.49   | 1,770.95 | 885.98   | 1,769.97 | 885.49   | 17    |
| 8  | 953.57   | 477.29 |    |      |    |      | G   | 1,674.89 | 837.95   | 1,657.87 | 829.44   | 1,656.88 | 828.94   | 16    |
| 9  | 1,050.62 | 525.81 |    |      |    |      | P   | 1,617.87 | 809.44   | 1,600.85 | 800.93   | 1,599.86 | 800.43   | 15    |

|    |          |          |          |          |          |          |   |          |        |          |        |          |        |    |
|----|----------|----------|----------|----------|----------|----------|---|----------|--------|----------|--------|----------|--------|----|
| 10 | 1,164.66 | 582.84   | 1,147.64 | 574.32   |          |          | N | 1,520.82 | 760.91 | 1,503.79 | 752.40 | 1,502.81 | 751.91 | 14 |
| 11 | 1,235.70 | 618.35   | 1,218.68 | 609.84   |          |          | A | 1,406.78 | 703.89 | 1,389.75 | 695.38 | 1,388.77 | 694.89 | 13 |
| 12 | 1,292.72 | 646.87   | 1,275.70 | 638.35   |          |          | G | 1,335.74 | 668.37 | 1,318.71 | 659.86 | 1,317.73 | 659.37 | 12 |
| 13 | 1,421.77 | 711.39   | 1,404.74 | 702.87   | 1,403.76 | 702.38   | E | 1,278.72 | 639.86 | 1,261.69 | 631.35 | 1,260.71 | 630.86 | 11 |
| 14 | 1,520.83 | 760.92   | 1,503.81 | 752.41   | 1,502.82 | 751.92   | V | 1,149.67 | 575.34 | 1,132.65 | 566.83 | 1,131.66 | 566.34 | 10 |
| 15 | 1,621.88 | 811.44   | 1,604.86 | 802.93   | 1,603.87 | 802.44   | T | 1,050.61 | 525.81 | 1,033.58 | 517.29 | 1,032.60 | 516.80 | 9  |
| 16 | 1,749.94 | 875.47   | 1,732.91 | 866.96   | 1,731.93 | 866.47   | Q | 949.56   | 475.28 | 932.53   | 466.77 |          |        | 8  |
| 17 | 1,806.96 | 903.98   | 1,789.94 | 895.47   | 1,788.95 | 894.98   | G | 821.50   | 411.25 | 804.47   | 402.74 |          |        | 7  |
| 18 | 1,954.03 | 977.52   | 1,937.00 | 969.01   | 1,936.02 | 968.51   | F | 764.48   | 382.74 | 747.45   | 374.23 |          |        | 6  |
| 19 | 2,025.07 | 1,013.04 | 2,008.04 | 1,004.52 | 2,007.06 | 1,004.03 | A | 617.41   | 309.21 | 600.38   | 300.70 |          |        | 5  |
| 20 | 2,096.10 | 1,048.56 | 2,079.08 | 1,040.04 | 2,078.09 | 1,039.55 | A | 546.37   | 273.69 | 529.35   | 265.18 |          |        | 4  |
| 21 | 2,167.14 | 1,084.07 | 2,150.12 | 1,075.56 | 2,149.13 | 1,075.07 | A | 475.34   | 238.17 | 458.31   | 229.66 |          |        | 3  |
| 22 | 2,280.23 | 1,140.62 | 2,263.20 | 1,132.10 | 2,262.22 | 1,131.61 | L | 404.30   | 202.65 | 387.27   | 194.14 |          |        | 2  |
| 23 |          |          |          |          |          |          | K | 291.21   | 146.11 | 274.19   | 137.60 |          |        | 1  |

Query 2906 Hit 1

MS/MS Fragmentation of **IDLVHVDGFIANVAHTFVVDVAQGTQVTGR**

Found in **sp|Q9UQ80|PA2G4\_HUMAN**, Proliferation-associated protein 2G4 OS=Homo sapiens GN=PA2G4 PE=1 SV=3

Match to Query 2906: 3378.782from(845.7027,4+)

Title: 1268: Scan 3097 (rt=78.0423, f=3, i=454) [D:\lab212\membrane\Grace\20120214\_iTRAQ\_2.raw]

Data File:

**Monoisotopic mass of neutral peptide Mr(calc): 3378.782**

**Variable modifications:**

**Ions Score: 132.71 Expect: 0.000**

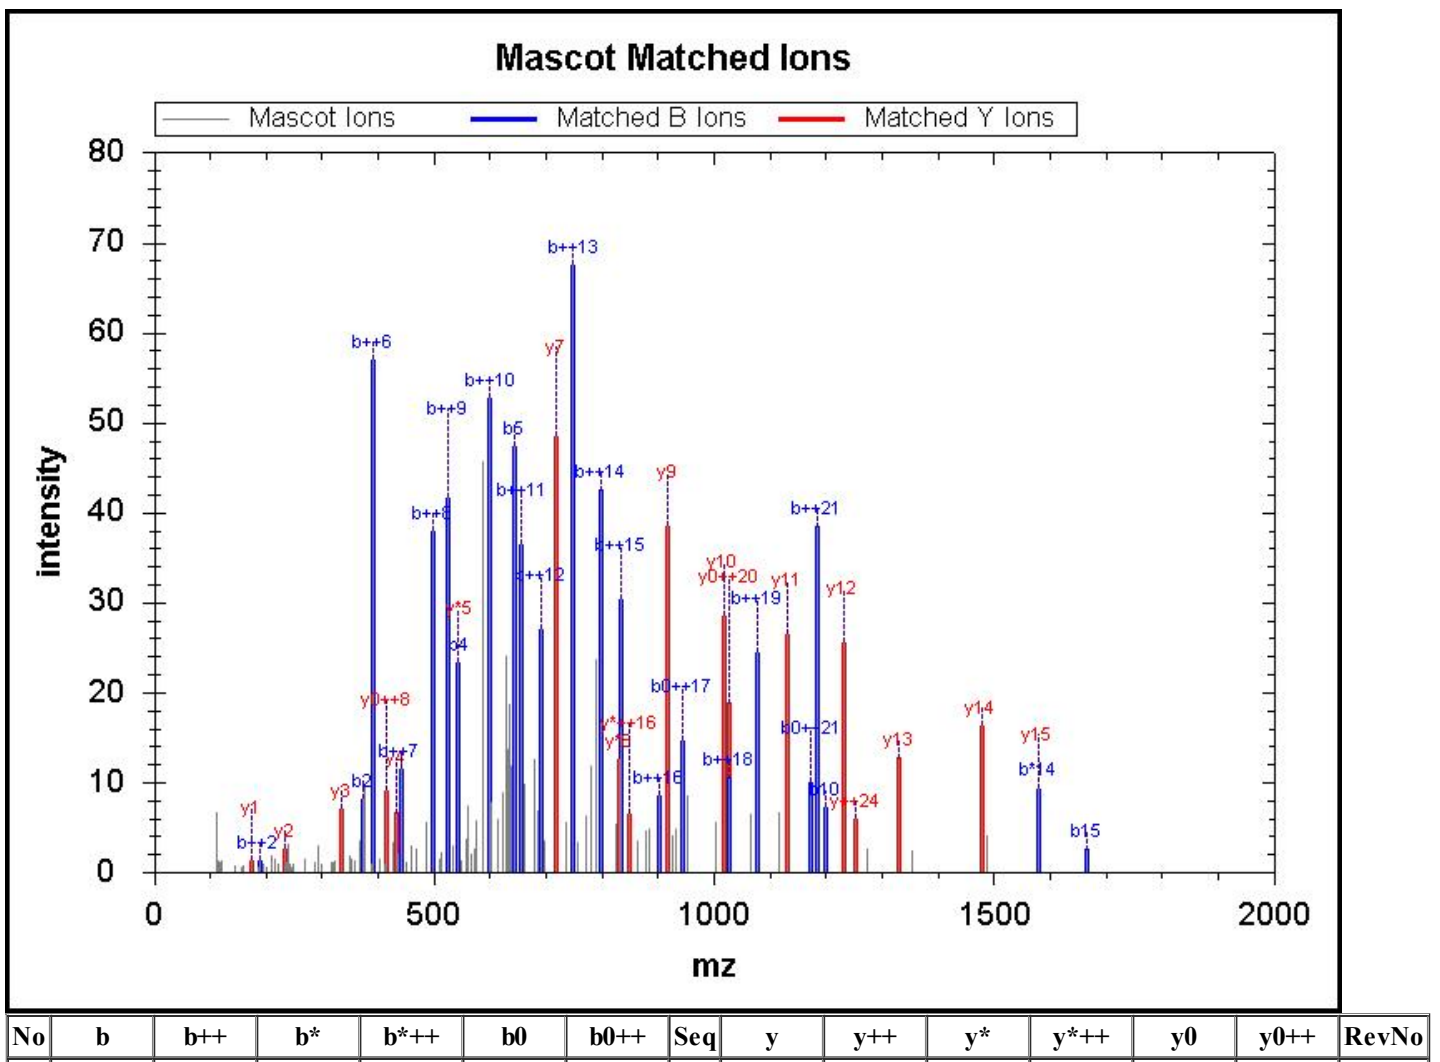



|    |          |          |          |          |          |          |   |          |          |          |          |          |          |    |
|----|----------|----------|----------|----------|----------|----------|---|----------|----------|----------|----------|----------|----------|----|
| 1  | 258.19   | 129.60   |          |          |          |          | I |          |          |          |          |          |          | 31 |
| 2  | 373.22   | 187.11   |          |          | 355.21   | 178.11   | D | 3,122.60 | 1,561.80 | 3,105.57 | 1,553.29 | 3,104.59 | 1,552.80 | 30 |
| 3  | 486.30   | 243.66   |          |          | 468.29   | 234.65   | L | 3,007.57 | 1,504.29 | 2,990.55 | 1,495.78 | 2,989.56 | 1,495.29 | 29 |
| 4  | 543.33   | 272.17   |          |          | 525.32   | 263.16   | G | 2,894.49 | 1,447.75 | 2,877.46 | 1,439.24 | 2,876.48 | 1,438.74 | 28 |
| 5  | 642.39   | 321.70   |          |          | 624.38   | 312.70   | V | 2,837.47 | 1,419.24 | 2,820.44 | 1,410.72 | 2,819.46 | 1,410.23 | 27 |
| 6  | 779.45   | 390.23   |          |          | 761.44   | 381.22   | H | 2,738.40 | 1,369.70 | 2,721.37 | 1,361.19 | 2,720.39 | 1,360.70 | 26 |
| 7  | 878.52   | 439.76   |          |          | 860.51   | 430.76   | V | 2,601.34 | 1,301.17 | 2,584.32 | 1,292.66 | 2,583.33 | 1,292.17 | 25 |
| 8  | 993.55   | 497.28   |          |          | 975.54   | 488.27   | D | 2,502.27 | 1,251.64 | 2,485.25 | 1,243.13 | 2,484.26 | 1,242.64 | 24 |
| 9  | 1,050.57 | 525.79   |          |          | 1,032.56 | 516.78   | G | 2,387.25 | 1,194.13 | 2,370.22 | 1,185.61 | 2,369.24 | 1,185.12 | 23 |
| 10 | 1,197.64 | 599.32   |          |          | 1,179.63 | 590.32   | F | 2,330.23 | 1,165.62 | 2,313.20 | 1,157.10 | 2,312.21 | 1,156.61 | 22 |
| 11 | 1,310.72 | 655.86   |          |          | 1,292.71 | 646.86   | I | 2,183.16 | 1,092.08 | 2,166.13 | 1,083.57 | 2,165.15 | 1,083.08 | 21 |
| 12 | 1,381.76 | 691.38   |          |          | 1,363.75 | 682.38   | A | 2,070.07 | 1,035.54 | 2,053.05 | 1,027.03 | 2,052.06 | 1,026.53 | 20 |
| 13 | 1,495.80 | 748.40   | 1,478.78 | 739.89   | 1,477.79 | 739.40   | N | 1,999.04 | 1,000.02 | 1,982.01 | 991.51   | 1,981.03 | 991.02   | 19 |
| 14 | 1,594.87 | 797.94   | 1,577.84 | 789.43   | 1,576.86 | 788.93   | V | 1,884.99 | 943.00   | 1,867.97 | 934.49   | 1,866.98 | 933.99   | 18 |
| 15 | 1,665.91 | 833.46   | 1,648.88 | 824.94   | 1,647.90 | 824.45   | A | 1,785.92 | 893.47   | 1,768.90 | 884.95   | 1,767.91 | 884.46   | 17 |
| 16 | 1,802.97 | 901.99   | 1,785.94 | 893.47   | 1,784.96 | 892.98   | H | 1,714.89 | 857.95   | 1,697.86 | 849.43   | 1,696.88 | 848.94   | 16 |
| 17 | 1,904.01 | 952.51   | 1,886.99 | 944.00   | 1,886.00 | 943.51   | T | 1,577.83 | 789.42   | 1,560.80 | 780.90   | 1,559.82 | 780.41   | 15 |
| 18 | 2,051.08 | 1,026.05 | 2,034.06 | 1,017.53 | 2,033.07 | 1,017.04 | F | 1,476.78 | 738.89   | 1,459.75 | 730.38   | 1,458.77 | 729.89   | 14 |
| 19 | 2,150.15 | 1,075.58 | 2,133.13 | 1,067.07 | 2,132.14 | 1,066.57 | V | 1,329.71 | 665.36   | 1,312.69 | 656.85   | 1,311.70 | 656.35   | 13 |
| 20 | 2,249.22 | 1,125.11 | 2,232.19 | 1,116.60 | 2,231.21 | 1,116.11 | V | 1,230.64 | 615.83   | 1,213.62 | 607.31   | 1,212.63 | 606.82   | 12 |
| 21 | 2,364.25 | 1,182.63 | 2,347.22 | 1,174.11 | 2,346.24 | 1,173.62 | D | 1,131.58 | 566.29   | 1,114.55 | 557.78   | 1,113.56 | 557.29   | 11 |
| 22 | 2,463.32 | 1,232.16 | 2,446.29 | 1,223.65 | 2,445.30 | 1,223.16 | V | 1,016.55 | 508.78   | 999.52   | 500.26   | 998.54   | 499.77   | 10 |
| 23 | 2,534.35 | 1,267.68 | 2,517.33 | 1,259.17 | 2,516.34 | 1,258.67 | A | 917.48   | 459.24   | 900.45   | 450.73   | 899.47   | 450.24   | 9  |
| 24 | 2,662.41 | 1,331.71 | 2,645.38 | 1,323.20 | 2,644.40 | 1,322.70 | Q | 846.44   | 423.73   | 829.42   | 415.21   | 828.43   | 414.72   | 8  |
| 25 | 2,719.43 | 1,360.22 | 2,702.41 | 1,351.71 | 2,701.42 | 1,351.21 | G | 718.38   | 359.70   | 701.36   | 351.18   | 700.37   | 350.69   | 7  |
| 26 | 2,820.48 | 1,410.74 | 2,803.45 | 1,402.23 | 2,802.47 | 1,401.74 | T | 661.36   | 331.18   | 644.34   | 322.67   | 643.35   | 322.18   | 6  |
| 27 | 2,948.54 | 1,474.77 | 2,931.51 | 1,466.26 | 2,930.53 | 1,465.77 | Q | 560.32   | 280.66   | 543.29   | 272.15   | 542.30   | 271.66   | 5  |
| 28 | 3,047.61 | 1,524.31 | 3,030.58 | 1,515.79 | 3,029.60 | 1,515.30 | V | 432.26   | 216.63   | 415.23   | 208.12   | 414.25   | 207.63   | 4  |
| 29 | 3,148.65 | 1,574.83 | 3,131.63 | 1,566.32 | 3,130.64 | 1,565.83 | T | 333.19   | 167.10   | 316.16   | 158.58   | 315.18   | 158.09   | 3  |
| 30 | 3,205.68 | 1,603.34 | 3,188.65 | 1,594.83 | 3,187.67 | 1,594.34 | G | 232.14   | 116.57   | 215.11   | 108.06   |          |          | 2  |
| 31 |          |          |          |          |          |          | R | 175.12   | 88.06    | 158.09   | 79.55    |          |          | 1  |
