# Supplementary material for: Quantitative Proteomic Analysis of Human Lung Tumor Xenografts Treated with the Ectopic ATP Synthase Inhibitor Citreoviridin
Source: PubMed Central journal article supplement (PMC3749231; doi:10.1371/journal.pone.0070642), 2013-08-21
Supplement: pone.0070642.s019.pdf [file pone.0070642.s019.pdf]

Spectra S2: The information of single-peptide-based protein identifications in the small-scale experiment.

MS/MS Fragmentation of **GLIDGVVEADLVEALQEFGPISYVVVMPK**

Found in **sp|P14866|HNRPL\_HUMAN**, Heterogeneous nuclear ribonucleoprotein L OS=Homo sapiens GN=HNRNPL PE=1 SV=2

Match to Query 2912: 3374.849from(1125.957,3+)

Title: 1430: Sum of 2 scans in range 3580 (rt=89.1048, f=4, i=1046) to 3581 (rt=89.1302, f=4, i=1047)

[D:\lab212\membrane\Grace\20120305-iTRAQ-2.raw]

Data File:

**Monoisotopic mass of neutral peptide Mr(calc): 3374.849**

**Variable modifications:**

**K29** iTRAQ4plex (K)

**Ions Score: 138.16 Expect: 0.000**

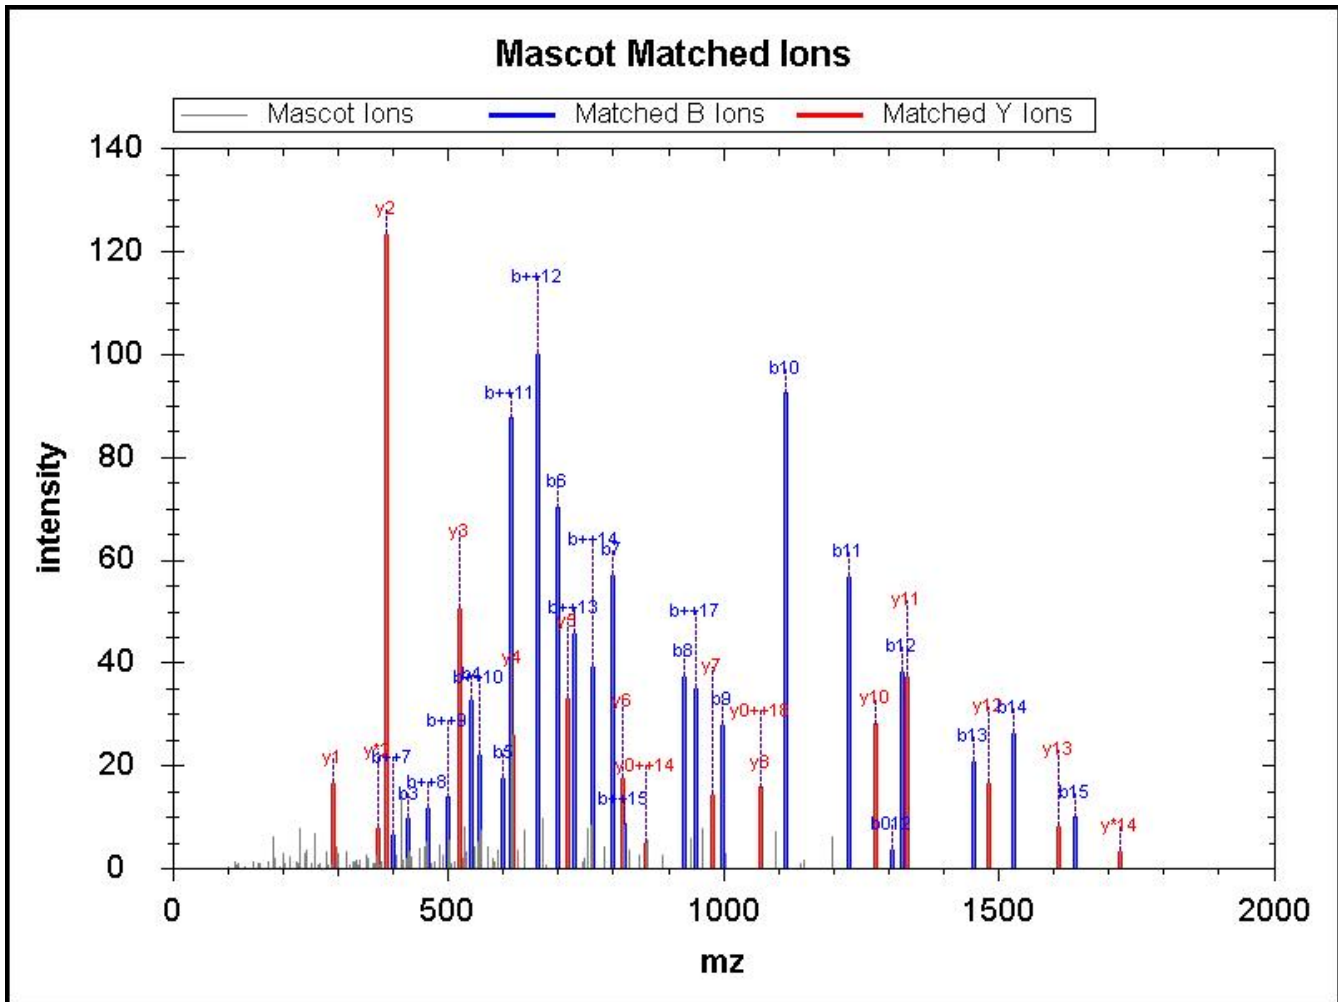

| No | b               | b++           | b* | b*++ | b0              | b0++   | Seq      | y        | y++      | y*       | y*++     | y0       | y0++            | RevNo |
|----|-----------------|---------------|----|------|-----------------|--------|----------|----------|----------|----------|----------|----------|-----------------|-------|
| 1  | 202.13          | 101.57        |    |      |                 |        | <b>G</b> |          |          |          |          |          |                 | 29    |
| 2  | 315.21          | 158.11        |    |      |                 |        | <b>L</b> | 3,174.71 | 1,587.86 | 3,157.69 | 1,579.35 | 3,156.70 | 1,578.85        | 28    |
| 3  | <b>428.30</b>   | 214.65        |    |      |                 |        | <b>I</b> | 3,061.63 | 1,531.32 | 3,044.60 | 1,522.80 | 3,043.62 | 1,522.31        | 27    |
| 4  | <b>543.33</b>   | 272.17        |    |      | 525.32          | 263.16 | <b>D</b> | 2,948.54 | 1,474.78 | 2,931.52 | 1,466.26 | 2,930.53 | 1,465.77        | 26    |
| 5  | <b>600.35</b>   | 300.68        |    |      | 582.34          | 291.67 | <b>G</b> | 2,833.52 | 1,417.26 | 2,816.49 | 1,408.75 | 2,815.51 | 1,408.26        | 25    |
| 6  | <b>699.42</b>   | 350.21        |    |      | 681.41          | 341.21 | <b>V</b> | 2,776.50 | 1,388.75 | 2,759.47 | 1,380.24 | 2,758.49 | 1,379.75        | 24    |
| 7  | <b>798.48</b>   | <b>399.75</b> |    |      | 780.47          | 390.74 | <b>V</b> | 2,677.43 | 1,339.22 | 2,660.40 | 1,330.70 | 2,659.42 | 1,330.21        | 23    |
| 8  | <b>927.53</b>   | <b>464.27</b> |    |      | 909.52          | 455.26 | <b>E</b> | 2,578.36 | 1,289.68 | 2,561.33 | 1,281.17 | 2,560.35 | 1,280.68        | 22    |
| 9  | <b>998.56</b>   | <b>499.79</b> |    |      | 980.55          | 490.78 | <b>A</b> | 2,449.32 | 1,225.16 | 2,432.29 | 1,216.65 | 2,431.31 | 1,216.16        | 21    |
| 10 | <b>1,113.59</b> | <b>557.30</b> |    |      | 1,095.58        | 548.29 | <b>D</b> | 2,378.28 | 1,189.64 | 2,361.25 | 1,181.13 | 2,360.27 | 1,180.64        | 20    |
| 11 | <b>1,226.67</b> | <b>613.84</b> |    |      | 1,208.66        | 604.84 | <b>L</b> | 2,263.25 | 1,132.13 | 2,246.23 | 1,123.62 | 2,245.24 | 1,123.12        | 19    |
| 12 | <b>1,325.74</b> | <b>663.38</b> |    |      | <b>1,307.73</b> | 654.37 | <b>V</b> | 2,150.17 | 1,075.59 | 2,133.14 | 1,067.07 | 2,132.16 | <b>1,066.58</b> | 18    |
| 13 | <b>1,454.79</b> | <b>727.90</b> |    |      | 1,436.78        | 718.89 | <b>E</b> | 2,051.10 | 1,026.05 | 2,034.07 | 1,017.54 | 2,033.09 | 1,017.05        | 17    |

|    |          |          |          |          |          |          |   |          |        |          |        |          |        |    |
|----|----------|----------|----------|----------|----------|----------|---|----------|--------|----------|--------|----------|--------|----|
| 14 | 1,525.82 | 763.42   |          |          | 1,507.81 | 754.41   | A | 1,922.06 | 961.53 | 1,905.03 | 953.02 | 1,904.05 | 952.53 | 16 |
| 15 | 1,638.91 | 819.96   |          |          | 1,620.90 | 810.95   | L | 1,851.02 | 926.01 | 1,833.99 | 917.50 | 1,833.01 | 917.01 | 15 |
| 16 | 1,766.97 | 883.99   | 1,749.94 | 875.47   | 1,748.96 | 874.98   | Q | 1,737.94 | 869.47 | 1,720.91 | 860.96 | 1,719.93 | 860.47 | 14 |
| 17 | 1,896.01 | 948.51   | 1,878.98 | 939.99   | 1,878.00 | 939.50   | E | 1,609.88 | 805.44 | 1,592.85 | 796.93 | 1,591.87 | 796.44 | 13 |
| 18 | 2,043.08 | 1,022.04 | 2,026.05 | 1,013.53 | 2,025.07 | 1,013.04 | F | 1,480.84 | 740.92 | 1,463.81 | 732.41 | 1,462.82 | 731.92 | 12 |
| 19 | 2,100.10 | 1,050.55 | 2,083.07 | 1,042.04 | 2,082.09 | 1,041.55 | G | 1,333.77 | 667.39 | 1,316.74 | 658.87 | 1,315.76 | 658.38 | 11 |
| 20 | 2,197.15 | 1,099.08 | 2,180.12 | 1,090.57 | 2,179.14 | 1,090.07 | P | 1,276.75 | 638.88 | 1,259.72 | 630.36 | 1,258.73 | 629.87 | 10 |
| 21 | 2,310.23 | 1,155.62 | 2,293.21 | 1,147.11 | 2,292.22 | 1,146.62 | I | 1,179.69 | 590.35 | 1,162.67 | 581.84 | 1,161.68 | 581.34 | 9  |
| 22 | 2,397.27 | 1,199.14 | 2,380.24 | 1,190.62 | 2,379.26 | 1,190.13 | S | 1,066.61 | 533.81 | 1,049.58 | 525.29 | 1,048.60 | 524.80 | 8  |
| 23 | 2,560.33 | 1,280.67 | 2,543.30 | 1,272.16 | 2,542.32 | 1,271.66 | Y | 979.58   | 490.29 | 962.55   | 481.78 |          |        | 7  |
| 24 | 2,659.40 | 1,330.20 | 2,642.37 | 1,321.69 | 2,641.39 | 1,321.20 | V | 816.51   | 408.76 | 799.49   | 400.25 |          |        | 6  |
| 25 | 2,758.47 | 1,379.74 | 2,741.44 | 1,371.22 | 2,740.46 | 1,370.73 | V | 717.44   | 359.23 | 700.42   | 350.71 |          |        | 5  |
| 26 | 2,857.54 | 1,429.27 | 2,840.51 | 1,420.76 | 2,839.52 | 1,420.27 | V | 618.38   | 309.69 | 601.35   | 301.18 |          |        | 4  |
| 27 | 2,988.58 | 1,494.79 | 2,971.55 | 1,486.28 | 2,970.57 | 1,485.79 | M | 519.31   | 260.16 | 502.28   | 251.64 |          |        | 3  |
| 28 | 3,085.63 | 1,543.32 | 3,068.60 | 1,534.80 | 3,067.62 | 1,534.31 | P | 388.27   | 194.64 | 371.24   | 186.12 |          |        | 2  |
| 29 |          |          |          |          |          |          | K | 291.21   | 146.11 | 274.19   | 137.60 |          |        | 1  |

Query 2629 Hit 1

MS/MS Fragmentation of **DLSAAGIGLLAAATQSLSPASLGR**

Found in **sp|P43243|MATR3\_HUMAN**, Matrin-3 OS=Homo sapiens GN=MATR3 PE=1 SV=2

Match to Query 2629: 2514.369 from (839.1303, 3+)

Title: 1158: Sum of 2 scans in range 2964 (rt=74.7768, f=4, i=814) to 2965 (rt=74.8022, f=4, i=815)

[D:\lab212\membrane\Grace\20120305-iTRAQ-1.raw]

Data File:

**Monoisotopic mass of neutral peptide Mr(calc): 2514.369**

**Variable modifications:**

**Ions Score: 125.9 Expect: 0.000**

### Mascot Matched Ions

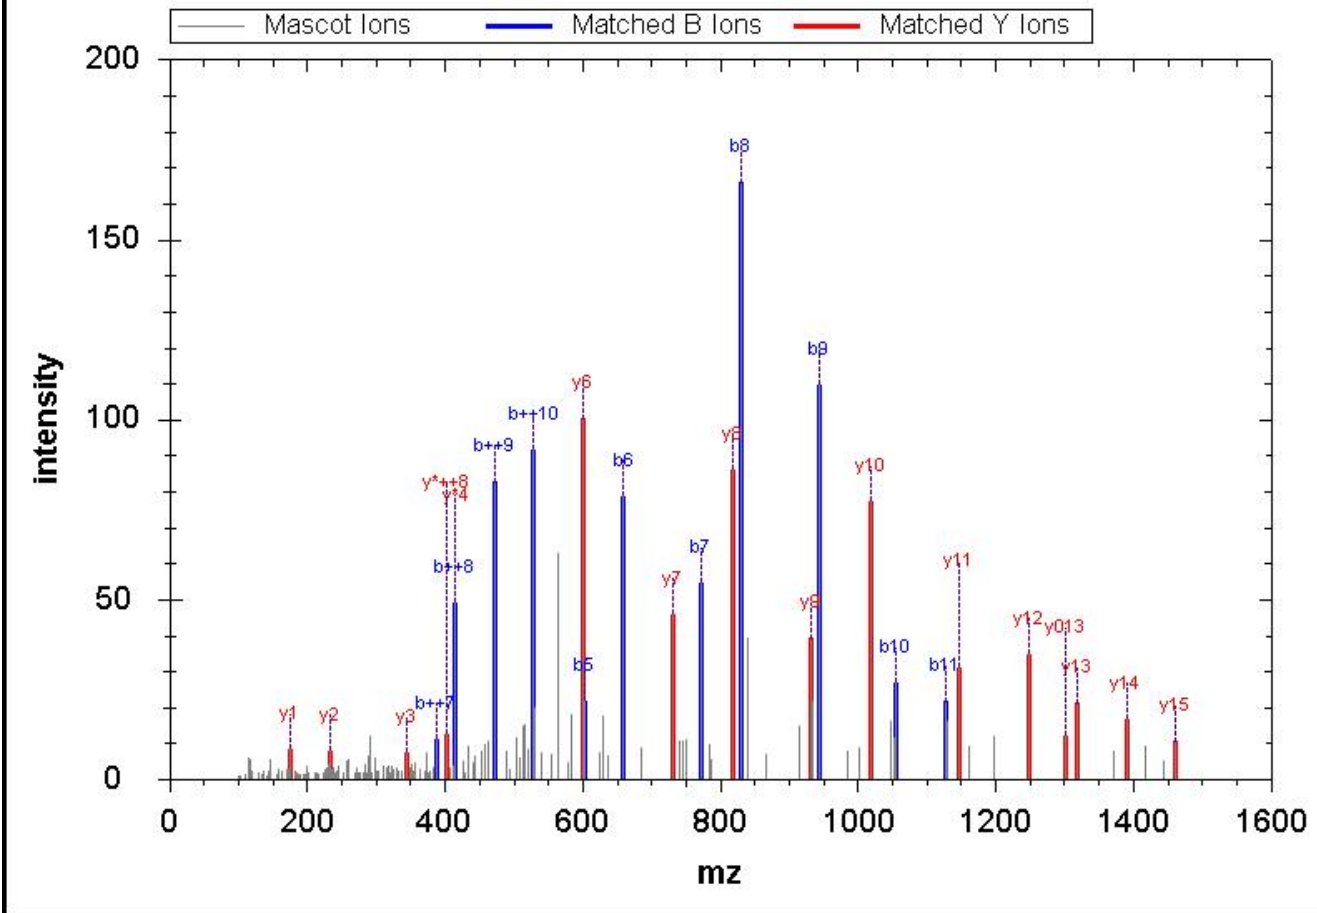

| No | b        | b++      | b*       | b***     | b0       | b0++     | Seq | y        | y++      | y*       | y***     | y0       | y0++     | RevNo |
|----|----------|----------|----------|----------|----------|----------|-----|----------|----------|----------|----------|----------|----------|-------|
| 1  | 260.14   | 130.57   |          |          | 242.13   | 121.57   | D   |          |          |          |          |          |          | 25    |
| 2  | 373.22   | 187.11   |          |          | 355.21   | 178.11   | L   | 2,256.24 | 1,128.62 | 2,239.21 | 1,120.11 | 2,238.23 | 1,119.62 | 24    |
| 3  | 460.25   | 230.63   |          |          | 442.24   | 221.62   | S   | 2,143.15 | 1,072.08 | 2,126.13 | 1,063.57 | 2,125.14 | 1,063.08 | 23    |
| 4  | 531.29   | 266.15   |          |          | 513.28   | 257.14   | A   | 2,056.12 | 1,028.56 | 2,039.10 | 1,020.05 | 2,038.11 | 1,019.56 | 22    |
| 5  | 602.33   | 301.67   |          |          | 584.32   | 292.66   | A   | 1,985.08 | 993.05   | 1,968.06 | 984.53   | 1,967.07 | 984.04   | 21    |
| 6  | 659.35   | 330.18   |          |          | 641.34   | 321.17   | G   | 1,914.05 | 957.53   | 1,897.02 | 949.01   | 1,896.04 | 948.52   | 20    |
| 7  | 772.43   | 386.72   |          |          | 754.42   | 377.71   | I   | 1,857.03 | 929.02   | 1,840.00 | 920.50   | 1,839.02 | 920.01   | 19    |
| 8  | 829.45   | 415.23   |          |          | 811.44   | 406.23   | G   | 1,743.94 | 872.47   | 1,726.92 | 863.96   | 1,725.93 | 863.47   | 18    |
| 9  | 942.54   | 471.77   |          |          | 924.53   | 462.77   | L   | 1,686.92 | 843.96   | 1,669.89 | 835.45   | 1,668.91 | 834.96   | 17    |
| 10 | 1,055.62 | 528.31   |          |          | 1,037.61 | 519.31   | L   | 1,573.84 | 787.42   | 1,556.81 | 778.91   | 1,555.83 | 778.42   | 16    |
| 11 | 1,126.66 | 563.83   |          |          | 1,108.65 | 554.83   | A   | 1,460.75 | 730.88   | 1,443.73 | 722.37   | 1,442.74 | 721.87   | 15    |
| 12 | 1,197.70 | 599.35   |          |          | 1,179.69 | 590.35   | A   | 1,389.72 | 695.36   | 1,372.69 | 686.85   | 1,371.70 | 686.36   | 14    |
| 13 | 1,268.73 | 634.87   |          |          | 1,250.72 | 625.86   | A   | 1,318.68 | 659.84   | 1,301.65 | 651.33   | 1,300.67 | 650.84   | 13    |
| 14 | 1,369.78 | 685.39   |          |          | 1,351.77 | 676.39   | T   | 1,247.64 | 624.32   | 1,230.61 | 615.81   | 1,229.63 | 615.32   | 12    |
| 15 | 1,497.84 | 749.42   | 1,480.81 | 740.91   | 1,479.83 | 740.42   | Q   | 1,146.59 | 573.80   | 1,129.57 | 565.29   | 1,128.58 | 564.80   | 11    |
| 16 | 1,584.87 | 792.94   | 1,567.84 | 784.43   | 1,566.86 | 783.93   | S   | 1,018.53 | 509.77   | 1,001.51 | 501.26   | 1,000.52 | 500.77   | 10    |
| 17 | 1,697.96 | 849.48   | 1,680.93 | 840.97   | 1,679.94 | 840.48   | L   | 931.50   | 466.26   | 914.48   | 457.74   | 913.49   | 457.25   | 9     |
| 18 | 1,784.99 | 893.00   | 1,767.96 | 884.48   | 1,766.98 | 883.99   | S   | 818.42   | 409.71   | 801.39   | 401.20   | 800.41   | 400.71   | 8     |
| 19 | 1,916.03 | 958.52   | 1,899.00 | 950.00   | 1,898.02 | 949.51   | M   | 731.39   | 366.20   | 714.36   | 357.68   | 713.38   | 357.19   | 7     |
| 20 | 2,013.08 | 1,007.04 | 1,996.05 | 998.53   | 1,995.07 | 998.04   | P   | 600.35   | 300.68   | 583.32   | 292.16   | 582.34   | 291.67   | 6     |
| 21 | 2,084.12 | 1,042.56 | 2,067.09 | 1,034.05 | 2,066.11 | 1,033.56 | A   | 503.29   | 252.15   | 486.27   | 243.64   | 485.28   | 243.15   | 5     |
| 22 | 2,171.15 | 1,086.08 | 2,154.12 | 1,077.57 | 2,153.14 | 1,077.07 | S   | 432.26   | 216.63   | 415.23   | 208.12   | 414.25   | 207.63   | 4     |
| 23 | 2,284.23 | 1,142.62 | 2,267.21 | 1,134.11 | 2,266.22 | 1,133.62 | L   | 345.22   | 173.12   | 328.20   | 164.60   |          |          | 3     |

|    |          |          |          |          |          |          |   |        |        |        |        |  |  |   |
|----|----------|----------|----------|----------|----------|----------|---|--------|--------|--------|--------|--|--|---|
| 24 | 2,341.26 | 1,171.13 | 2,324.23 | 1,162.62 | 2,323.24 | 1,162.13 | G | 232.14 | 116.57 | 215.11 | 108.06 |  |  | 2 |
| 25 |          |          |          |          |          |          | R | 175.12 | 88.06  | 158.09 | 79.55  |  |  | 1 |

Query 2964 Hit 1

MS/MS Fragmentation of **GVDNTFADELVELSTALEHQEYITFLEDLK**

Found in **sp|Q07021|C1QBP\_HUMAN**, Complement component 1 Q subcomponent-binding protein

Match to Query 2964: 3726.892from(932.7303,4+)

Title: 1331: Scan 3428 (rt=85.2295, f=3, i=491) [D:\lab212\membrane\Grace\20120305-iTRAQ-1.raw]

Data File:

**Monoisotopic mass of neutral peptide Mr(calc): 3726.892**

**Variable modifications:**

**K30** iTRAQ4plex (K)

**Ions Score: 118.68 Expect: 0.000**

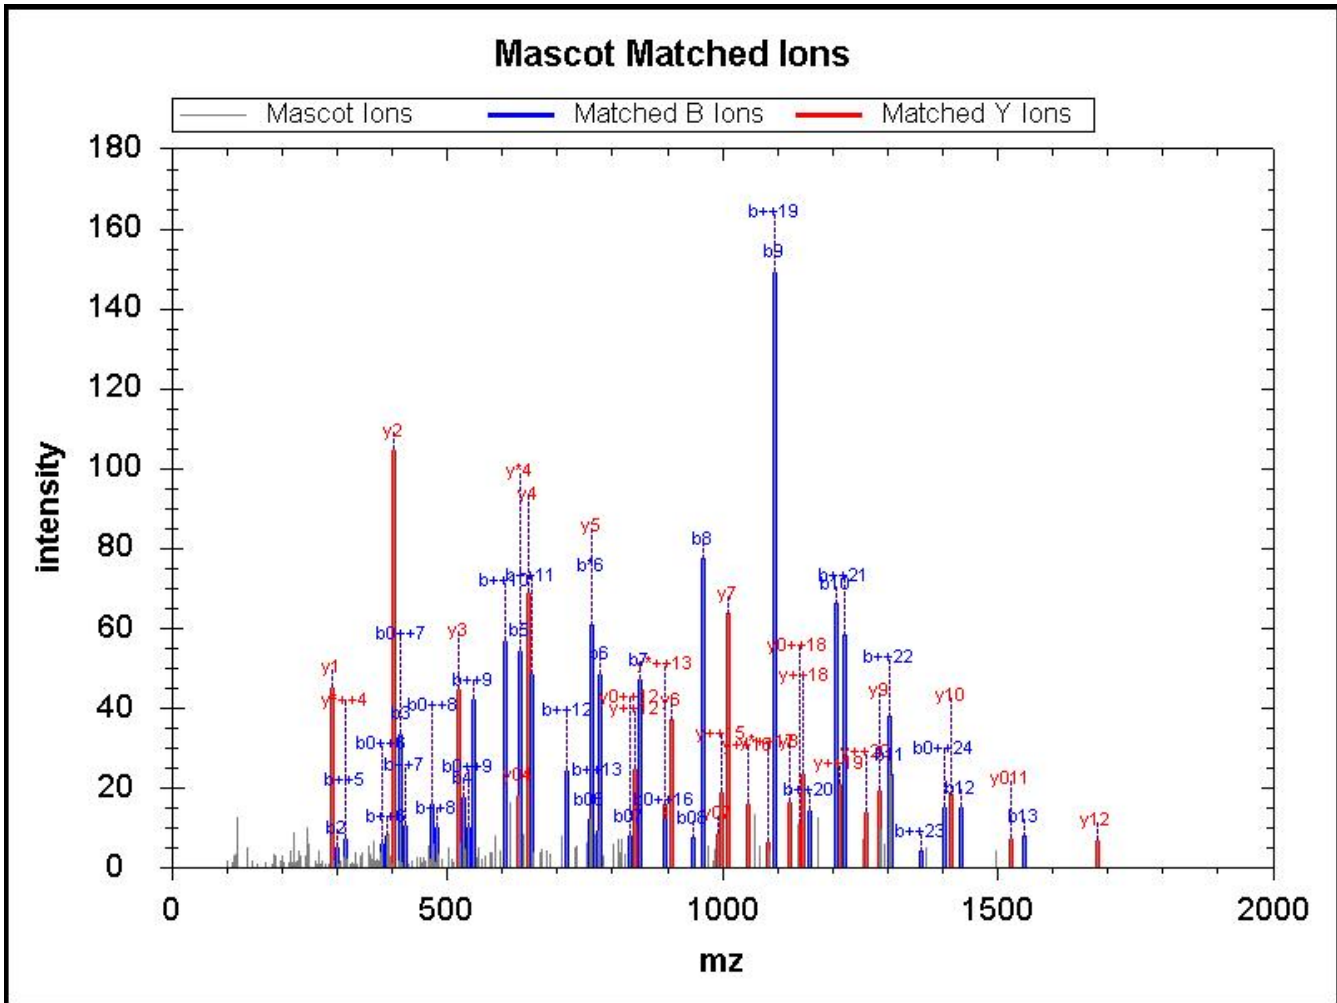

| No | b        | b++    | b*       | b*++   | b0       | b0++   | Seq | y        | y++      | y*       | y*++     | y0       | y0++     | RevNo |
|----|----------|--------|----------|--------|----------|--------|-----|----------|----------|----------|----------|----------|----------|-------|
| 1  | 202.13   | 101.57 |          |        |          |        | G   |          |          |          |          |          |          | 30    |
| 2  | 301.20   | 151.10 |          |        |          |        | V   | 3,526.76 | 1,763.88 | 3,509.73 | 1,755.37 | 3,508.75 | 1,754.88 | 29    |
| 3  | 416.23   | 208.62 |          |        | 398.22   | 199.61 | D   | 3,427.69 | 1,714.35 | 3,410.66 | 1,705.84 | 3,409.68 | 1,705.34 | 28    |
| 4  | 530.27   | 265.64 | 513.24   | 257.12 | 512.26   | 256.63 | N   | 3,312.66 | 1,656.84 | 3,295.64 | 1,648.32 | 3,294.65 | 1,647.83 | 27    |
| 5  | 631.32   | 316.16 | 614.29   | 307.65 | 613.31   | 307.16 | T   | 3,198.62 | 1,599.81 | 3,181.59 | 1,591.30 | 3,180.61 | 1,590.81 | 26    |
| 6  | 778.39   | 389.70 | 761.36   | 381.18 | 760.37   | 380.69 | F   | 3,097.57 | 1,549.29 | 3,080.55 | 1,540.78 | 3,079.56 | 1,540.29 | 25    |
| 7  | 849.42   | 425.21 | 832.40   | 416.70 | 831.41   | 416.21 | A   | 2,950.50 | 1,475.76 | 2,933.48 | 1,467.24 | 2,932.49 | 1,466.75 | 24    |
| 8  | 964.45   | 482.73 | 947.42   | 474.21 | 946.44   | 473.72 | D   | 2,879.47 | 1,440.24 | 2,862.44 | 1,431.72 | 2,861.46 | 1,431.23 | 23    |
| 9  | 1,093.49 | 547.25 | 1,076.47 | 538.74 | 1,075.48 | 538.24 | E   | 2,764.44 | 1,382.72 | 2,747.41 | 1,374.21 | 2,746.43 | 1,373.72 | 22    |
| 10 | 1,206.58 | 603.79 | 1,189.55 | 595.28 | 1,188.57 | 594.79 | L   | 2,635.40 | 1,318.20 | 2,618.37 | 1,309.69 | 2,617.39 | 1,309.20 | 21    |
| 11 | 1,305.64 | 653.33 | 1,288.62 | 644.81 | 1,287.63 | 644.32 | V   | 2,522.31 | 1,261.66 | 2,505.29 | 1,253.15 | 2,504.30 | 1,252.66 | 20    |

|    |          |          |          |          |          |          |   |          |          |          |          |          |          |    |
|----|----------|----------|----------|----------|----------|----------|---|----------|----------|----------|----------|----------|----------|----|
| 12 | 1,434.69 | 717.85   | 1,417.66 | 709.33   | 1,416.68 | 708.84   | E | 2,423.25 | 1,212.13 | 2,406.22 | 1,203.61 | 2,405.24 | 1,203.12 | 19 |
| 13 | 1,547.77 | 774.39   | 1,530.74 | 765.88   | 1,529.76 | 765.38   | L | 2,294.20 | 1,147.61 | 2,277.18 | 1,139.09 | 2,276.19 | 1,138.60 | 18 |
| 14 | 1,634.80 | 817.91   | 1,617.78 | 809.39   | 1,616.79 | 808.90   | S | 2,181.12 | 1,091.06 | 2,164.09 | 1,082.55 | 2,163.11 | 1,082.06 | 17 |
| 15 | 1,735.85 | 868.43   | 1,718.82 | 859.92   | 1,717.84 | 859.42   | T | 2,094.09 | 1,047.55 | 2,077.06 | 1,039.03 | 2,076.08 | 1,038.54 | 16 |
| 16 | 1,806.89 | 903.95   | 1,789.86 | 895.43   | 1,788.88 | 894.94   | A | 1,993.04 | 997.02   | 1,976.01 | 988.51   | 1,975.03 | 988.02   | 15 |
| 17 | 1,919.97 | 960.49   | 1,902.95 | 951.98   | 1,901.96 | 951.48   | L | 1,922.00 | 961.51   | 1,904.98 | 952.99   | 1,903.99 | 952.50   | 14 |
| 18 | 2,049.01 | 1,025.01 | 2,031.99 | 1,016.50 | 2,031.00 | 1,016.01 | E | 1,808.92 | 904.96   | 1,791.89 | 896.45   | 1,790.91 | 895.96   | 13 |
| 19 | 2,186.07 | 1,093.54 | 2,169.05 | 1,085.03 | 2,168.06 | 1,084.54 | H | 1,679.88 | 840.44   | 1,662.85 | 831.93   | 1,661.87 | 831.44   | 12 |
| 20 | 2,314.13 | 1,157.57 | 2,297.11 | 1,149.06 | 2,296.12 | 1,148.56 | Q | 1,542.82 | 771.91   | 1,525.79 | 763.40   | 1,524.81 | 762.91   | 11 |
| 21 | 2,443.17 | 1,222.09 | 2,426.15 | 1,213.58 | 2,425.16 | 1,213.09 | E | 1,414.76 | 707.88   | 1,397.73 | 699.37   | 1,396.75 | 698.88   | 10 |
| 22 | 2,606.24 | 1,303.62 | 2,589.21 | 1,295.11 | 2,588.23 | 1,294.62 | Y | 1,285.72 | 643.36   | 1,268.69 | 634.85   | 1,267.71 | 634.36   | 9  |
| 23 | 2,719.32 | 1,360.16 | 2,702.29 | 1,351.65 | 2,701.31 | 1,351.16 | I | 1,122.65 | 561.83   | 1,105.63 | 553.32   | 1,104.64 | 552.82   | 8  |
| 24 | 2,820.37 | 1,410.69 | 2,803.34 | 1,402.17 | 2,802.36 | 1,401.68 | T | 1,009.57 | 505.29   | 992.54   | 496.77   | 991.56   | 496.28   | 7  |
| 25 | 2,967.44 | 1,484.22 | 2,950.41 | 1,475.71 | 2,949.43 | 1,475.22 | F | 908.52   | 454.76   | 891.49   | 446.25   | 890.51   | 445.76   | 6  |
| 26 | 3,080.52 | 1,540.76 | 3,063.49 | 1,532.25 | 3,062.51 | 1,531.76 | L | 761.45   | 381.23   | 744.43   | 372.72   | 743.44   | 372.22   | 5  |
| 27 | 3,209.56 | 1,605.29 | 3,192.54 | 1,596.77 | 3,191.55 | 1,596.28 | E | 648.37   | 324.69   | 631.34   | 316.17   | 630.36   | 315.68   | 4  |
| 28 | 3,324.59 | 1,662.80 | 3,307.56 | 1,654.29 | 3,306.58 | 1,653.79 | D | 519.33   | 260.17   | 502.30   | 251.65   | 501.32   | 251.16   | 3  |
| 29 | 3,437.67 | 1,719.34 | 3,420.65 | 1,710.83 | 3,419.66 | 1,710.34 | L | 404.30   | 202.65   | 387.27   | 194.14   |          |          | 2  |
| 30 |          |          |          |          |          |          | K | 291.21   | 146.11   | 274.19   | 137.60   |          |          | 1  |

Query 2977 Hit 1

MS/MS Fragmentation of **IPNFWVTTFFVNHPQVSALLGEEDEEALHYLTR**

Found in **sp|Q01105|SET\_HUMAN**, Protein SET OS=Homo sapiens GN=SET PE=1 SV=3

Match to Query 2977: 3868.96from(968.2472,4+)

Title: 1098: Scan 2819 (rt=71.505, f=2, i=420) [D:\lab212\membrane\Grace\20120305-iTRAQ-1.raw]

Data File:

**Monoisotopic mass of neutral peptide Mr(calc): 3868.96**

**Variable modifications:**

**Ions Score: 107.9 Expect: 0.000**

### Mascot Matched Ions

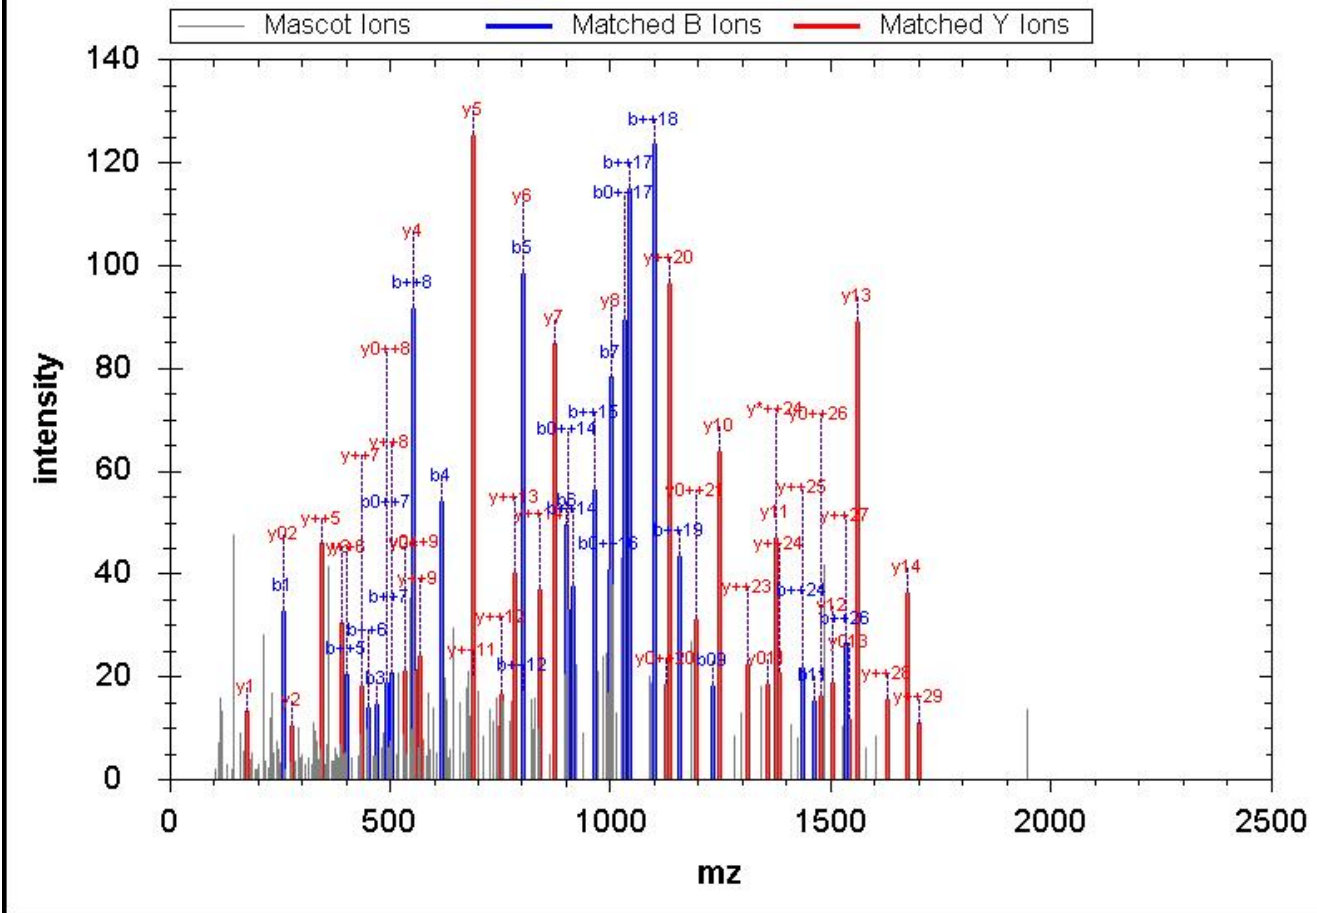

| No | b               | b++             | b*       | b*++     | b0              | b0++            | Seq | y               | y++             | y*       | y*++            | y0              | y0++            | RevNo |
|----|-----------------|-----------------|----------|----------|-----------------|-----------------|-----|-----------------|-----------------|----------|-----------------|-----------------|-----------------|-------|
| 1  | <b>258.19</b>   | 129.60          |          |          |                 |                 | I   |                 |                 |          |                 |                 |                 | 32    |
| 2  | 355.25          | 178.13          |          |          |                 |                 | P   | 3,612.78        | 1,806.89        | 3,595.75 | 1,798.38        | 3,594.76        | 1,797.89        | 31    |
| 3  | <b>469.29</b>   | 235.15          | 452.26   | 226.63   |                 |                 | N   | 3,515.72        | 1,758.36        | 3,498.70 | 1,749.85        | 3,497.71        | 1,749.36        | 30    |
| 4  | <b>616.36</b>   | 308.68          | 599.33   | 300.17   |                 |                 | F   | 3,401.68        | <b>1,701.34</b> | 3,384.65 | 1,692.83        | 3,383.67        | 1,692.34        | 29    |
| 5  | <b>802.44</b>   | <b>401.72</b>   | 785.41   | 393.21   |                 |                 | W   | 3,254.61        | <b>1,627.81</b> | 3,237.58 | 1,619.30        | 3,236.60        | 1,618.80        | 28    |
| 6  | <b>901.51</b>   | <b>451.26</b>   | 884.48   | 442.74   |                 |                 | V   | 3,068.53        | <b>1,534.77</b> | 3,051.51 | 1,526.26        | 3,050.52        | 1,525.76        | 27    |
| 7  | <b>1,002.55</b> | <b>501.78</b>   | 985.53   | 493.27   | 984.54          | <b>492.77</b>   | T   | 2,969.46        | 1,485.24        | 2,952.44 | 1,476.72        | 2,951.45        | <b>1,476.23</b> | 26    |
| 8  | 1,103.60        | <b>552.30</b>   | 1,086.57 | 543.79   | 1,085.59        | 543.30          | T   | 2,868.42        | <b>1,434.71</b> | 2,851.39 | 1,426.20        | 2,850.41        | 1,425.71        | 25    |
| 9  | 1,250.67        | 625.84          | 1,233.64 | 617.33   | <b>1,232.66</b> | 616.83          | F   | 2,767.37        | <b>1,384.19</b> | 2,750.34 | <b>1,375.67</b> | 2,749.36        | 1,375.18        | 24    |
| 10 | 1,349.74        | 675.37          | 1,332.71 | 666.86   | 1,331.73        | 666.37          | V   | 2,620.30        | <b>1,310.65</b> | 2,603.27 | 1,302.14        | 2,602.29        | 1,301.65        | 23    |
| 11 | <b>1,463.78</b> | 732.39          | 1,446.75 | 723.88   | 1,445.77        | 723.39          | N   | 2,521.23        | 1,261.12        | 2,504.21 | 1,252.61        | 2,503.22        | 1,252.11        | 22    |
| 12 | 1,600.84        | <b>800.92</b>   | 1,583.81 | 792.41   | 1,582.83        | 791.92          | H   | 2,407.19        | 1,204.10        | 2,390.16 | 1,195.58        | 2,389.18        | <b>1,195.09</b> | 21    |
| 13 | 1,697.89        | 849.45          | 1,680.87 | 840.94   | 1,679.88        | 840.44          | P   | 2,270.13        | <b>1,135.57</b> | 2,253.10 | 1,127.06        | 2,252.12        | <b>1,126.56</b> | 20    |
| 14 | 1,825.95        | <b>913.48</b>   | 1,808.92 | 904.97   | 1,807.94        | <b>904.47</b>   | Q   | 2,173.08        | 1,087.04        | 2,156.05 | 1,078.53        | 2,155.07        | 1,078.04        | 19    |
| 15 | 1,925.02        | <b>963.01</b>   | 1,907.99 | 954.50   | 1,907.01        | 954.01          | V   | 2,045.02        | 1,023.01        | 2,027.99 | 1,014.50        | 2,027.01        | 1,014.01        | 18    |
| 16 | 2,012.05        | 1,006.53        | 1,995.02 | 998.02   | 1,994.04        | <b>997.52</b>   | S   | 1,945.95        | 973.48          | 1,928.92 | 964.97          | 1,927.94        | 964.47          | 17    |
| 17 | 2,083.09        | <b>1,042.05</b> | 2,066.06 | 1,033.53 | 2,065.08        | <b>1,033.04</b> | A   | 1,858.92        | 929.96          | 1,841.89 | 921.45          | 1,840.91        | 920.96          | 16    |
| 18 | 2,196.17        | <b>1,098.59</b> | 2,179.15 | 1,090.08 | 2,178.16        | 1,089.58        | L   | 1,787.88        | 894.44          | 1,770.85 | 885.93          | 1,769.87        | 885.44          | 15    |
| 19 | 2,309.26        | <b>1,155.13</b> | 2,292.23 | 1,146.62 | 2,291.25        | 1,146.13        | L   | <b>1,674.80</b> | <b>837.90</b>   | 1,657.77 | 829.39          | 1,656.79        | 828.90          | 14    |
| 20 | 2,366.28        | 1,183.64        | 2,349.25 | 1,175.13 | 2,348.27        | 1,174.64        | G   | <b>1,561.71</b> | <b>781.36</b>   | 1,544.69 | 772.85          | <b>1,543.70</b> | 772.35          | 13    |
| 21 | 2,495.32        | 1,248.16        | 2,478.29 | 1,239.65 | 2,477.31        | 1,239.16        | E   | <b>1,504.69</b> | <b>752.85</b>   | 1,487.66 | 744.34          | 1,486.68        | 743.84          | 12    |
| 22 | 2,624.36        | 1,312.69        | 2,607.34 | 1,304.17 | 2,606.35        | 1,303.68        | E   | <b>1,375.65</b> | <b>688.33</b>   | 1,358.62 | 679.81          | <b>1,357.64</b> | 679.32          | 11    |
| 23 | 2,739.39        | 1,370.20        | 2,722.36 | 1,361.69 | 2,721.38        | 1,361.19        | D   | <b>1,246.61</b> | 623.81          | 1,229.58 | 615.29          | 1,228.60        | 614.80          | 10    |

|    |          |          |          |          |          |          |   |          |        |          |        |          |        |   |
|----|----------|----------|----------|----------|----------|----------|---|----------|--------|----------|--------|----------|--------|---|
| 24 | 2,868.43 | 1,434.72 | 2,851.41 | 1,426.21 | 2,850.42 | 1,425.71 | E | 1,131.58 | 566.29 | 1,114.55 | 557.78 | 1,113.57 | 557.29 | 9 |
| 25 | 2,997.47 | 1,499.24 | 2,980.45 | 1,490.73 | 2,979.46 | 1,490.24 | E | 1,002.54 | 501.77 | 985.51   | 493.26 | 984.53   | 492.77 | 8 |
| 26 | 3,068.51 | 1,534.76 | 3,051.49 | 1,526.25 | 3,050.50 | 1,525.75 | A | 873.49   | 437.25 | 856.47   | 428.74 | 855.48   | 428.25 | 7 |
| 27 | 3,181.60 | 1,591.30 | 3,164.57 | 1,582.79 | 3,163.59 | 1,582.30 | L | 802.46   | 401.73 | 785.43   | 393.22 | 784.45   | 392.73 | 6 |
| 28 | 3,318.65 | 1,659.83 | 3,301.63 | 1,651.32 | 3,300.64 | 1,650.83 | H | 689.37   | 345.19 | 672.35   | 336.68 | 671.36   | 336.18 | 5 |
| 29 | 3,481.72 | 1,741.36 | 3,464.69 | 1,732.85 | 3,463.71 | 1,732.36 | Y | 552.31   | 276.66 | 535.29   | 268.15 | 534.30   | 267.66 | 4 |
| 30 | 3,594.80 | 1,797.90 | 3,577.78 | 1,789.39 | 3,576.79 | 1,788.90 | L | 389.25   | 195.13 | 372.22   | 186.62 | 371.24   | 186.12 | 3 |
| 31 | 3,695.85 | 1,848.43 | 3,678.82 | 1,839.92 | 3,677.84 | 1,839.42 | T | 276.17   | 138.59 | 259.14   | 130.07 | 258.16   | 129.58 | 2 |
| 32 |          |          |          |          |          |          | R | 175.12   | 88.06  | 158.09   | 79.55  |          |        | 1 |

Query 2511 Hit 1

MS/MS Fragmentation of **MLIAMVDVIFADVAQPDQTR**

Found in **sp|P22087|FBRL\_HUMAN**, rRNA 2'-O-methyltransferase fibrillarin OS=Homo sapiens GN=FBL PE=1 SV=2

Match to Query 2511: 2376.245from(793.0888,3+)

Title: 1399: Scan 3478 (rt=86.8031, f=2, i=536) [D:\lab212\membrane\Grace\20120305-iTRAQ-2.raw]

Data File:

**Monoisotopic mass of neutral peptide Mr(calc): 2376.245**

**Variable modifications:**

**Ions Score: 103.99 Expect: 0.000**

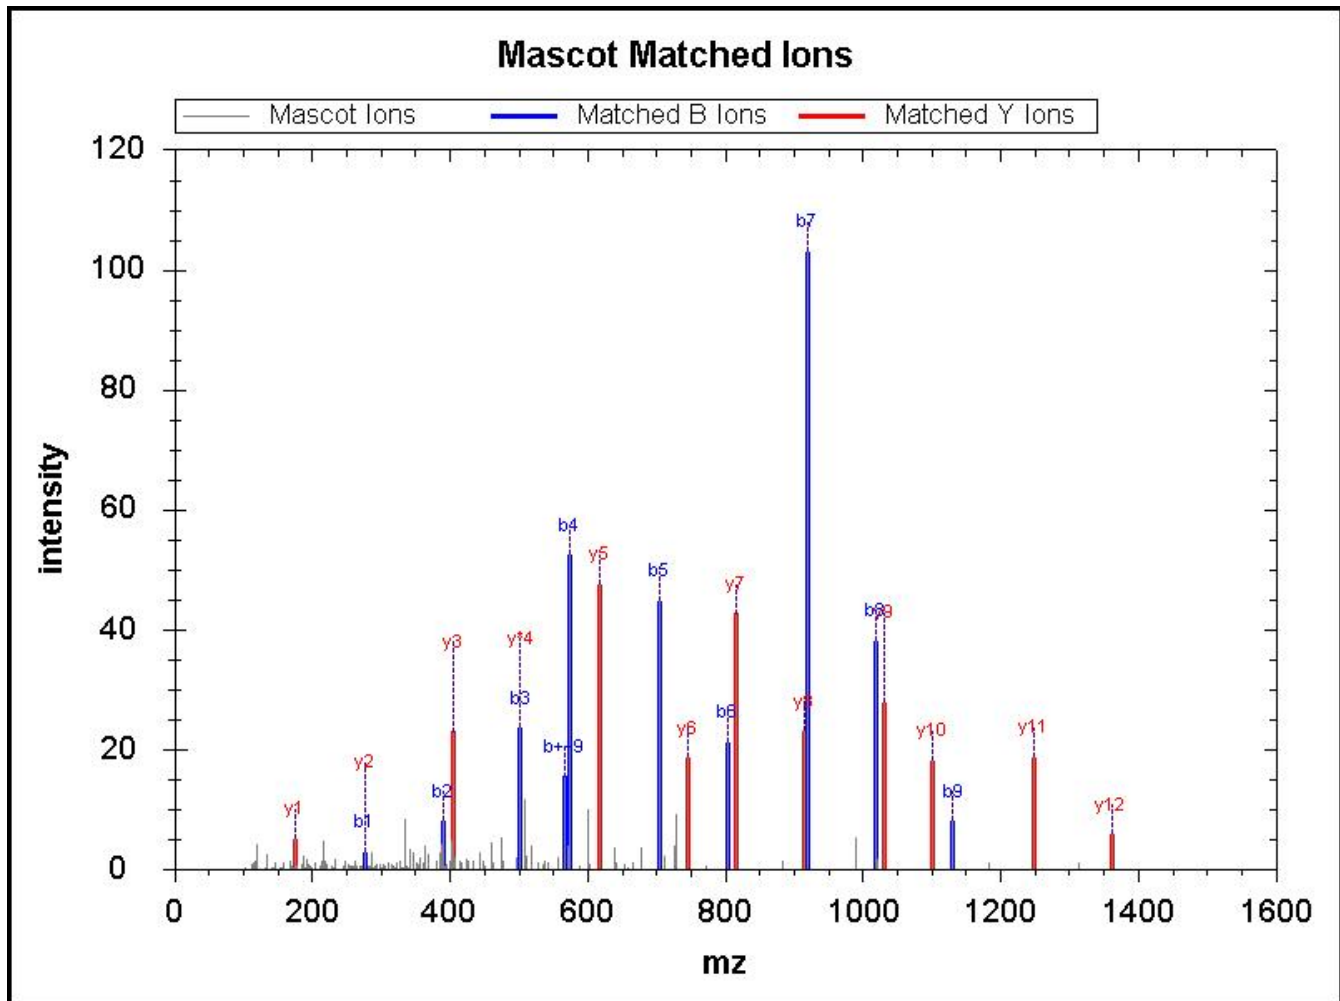

| No | b      | b++    | b* | b*** | b0 | b0++ | Seq | y        | y++      | y*       | y***     | y0       | y0++     | RevNo |
|----|--------|--------|----|------|----|------|-----|----------|----------|----------|----------|----------|----------|-------|
| 1  | 276.15 | 138.58 |    |      |    |      | M   |          |          |          |          |          |          | 20    |
| 2  | 389.23 | 195.12 |    |      |    |      | L   | 2,102.10 | 1,051.55 | 2,085.07 | 1,043.04 | 2,084.08 | 1,042.55 | 19    |
| 3  | 502.32 | 251.66 |    |      |    |      | I   | 1,989.01 | 995.01   | 1,971.98 | 986.50   | 1,971.00 | 986.00   | 18    |
| 4  | 573.36 | 287.18 |    |      |    |      | A   | 1,875.93 | 938.47   | 1,858.90 | 929.95   | 1,857.92 | 929.46   | 17    |
| 5  | 704.40 | 352.70 |    |      |    |      | M   | 1,804.89 | 902.95   | 1,787.86 | 894.44   | 1,786.88 | 893.94   | 16    |



|    |          |          |          |          |          |          |   |          |        |          |        |          |        |    |
|----|----------|----------|----------|----------|----------|----------|---|----------|--------|----------|--------|----------|--------|----|
| 6  | 803.46   | 402.24   |          |          |          |          | V | 1,673.85 | 837.43 | 1,656.82 | 828.92 | 1,655.84 | 828.42 | 15 |
| 7  | 918.49   | 459.75   |          |          | 900.48   | 450.74   | D | 1,574.78 | 787.89 | 1,557.75 | 779.38 | 1,556.77 | 778.89 | 14 |
| 8  | 1,017.56 | 509.28   |          |          | 999.55   | 500.28   | V | 1,459.75 | 730.38 | 1,442.73 | 721.87 | 1,441.74 | 721.38 | 13 |
| 9  | 1,130.64 | 565.83   |          |          | 1,112.63 | 556.82   | I | 1,360.69 | 680.85 | 1,343.66 | 672.33 | 1,342.68 | 671.84 | 12 |
| 10 | 1,277.71 | 639.36   |          |          | 1,259.70 | 630.35   | F | 1,247.60 | 624.30 | 1,230.58 | 615.79 | 1,229.59 | 615.30 | 11 |
| 11 | 1,348.75 | 674.88   |          |          | 1,330.74 | 665.87   | A | 1,100.53 | 550.77 | 1,083.51 | 542.26 | 1,082.52 | 541.76 | 10 |
| 12 | 1,463.78 | 732.39   |          |          | 1,445.77 | 723.39   | D | 1,029.50 | 515.25 | 1,012.47 | 506.74 | 1,011.49 | 506.25 | 9  |
| 13 | 1,562.84 | 781.93   |          |          | 1,544.83 | 772.92   | V | 914.47   | 457.74 | 897.44   | 449.22 | 896.46   | 448.73 | 8  |
| 14 | 1,633.88 | 817.44   |          |          | 1,615.87 | 808.44   | A | 815.40   | 408.20 | 798.37   | 399.69 | 797.39   | 399.20 | 7  |
| 15 | 1,761.94 | 881.47   | 1,744.91 | 872.96   | 1,743.93 | 872.47   | Q | 744.36   | 372.69 | 727.34   | 364.17 | 726.35   | 363.68 | 6  |
| 16 | 1,858.99 | 930.00   | 1,841.97 | 921.49   | 1,840.98 | 920.99   | P | 616.30   | 308.66 | 599.28   | 300.14 | 598.29   | 299.65 | 5  |
| 17 | 1,974.02 | 987.51   | 1,956.99 | 979.00   | 1,956.01 | 978.51   | D | 519.25   | 260.13 | 502.23   | 251.62 | 501.24   | 251.12 | 4  |
| 18 | 2,102.08 | 1,051.54 | 2,085.05 | 1,043.03 | 2,084.07 | 1,042.54 | Q | 404.23   | 202.62 | 387.20   | 194.10 | 386.21   | 193.61 | 3  |
| 19 | 2,203.13 | 1,102.07 | 2,186.10 | 1,093.55 | 2,185.12 | 1,093.06 | T | 276.17   | 138.59 | 259.14   | 130.07 | 258.16   | 129.58 | 2  |
| 20 |          |          |          |          |          |          | R | 175.12   | 88.06  | 158.09   | 79.55  |          |        | 1  |

Query 2602 Hit 1

MS/MS Fragmentation of **YNEDLELEDAIHTAILTK**

Found in **sp|P25787|PSA2\_HUMAN**, Proteasome subunit alpha type-2 OS=Homo sapiens GN=PSMA2 PE=1 SV=2

Match to Query 2602: 2488.347 from (830.4564, 3+)

Title: 1116: Scan 2711 (rt=69.5208, f=3, i=386) [D:\lab212\membrane\Grace\20120305-iTRAQ-2.raw]

Data File:

**Monoisotopic mass of neutral peptide Mr(calc): 2488.347**

**Variable modifications:**

**K19** iTRAQ4plex (K)

**Ions Score: 97.39 Expect: 0.000**

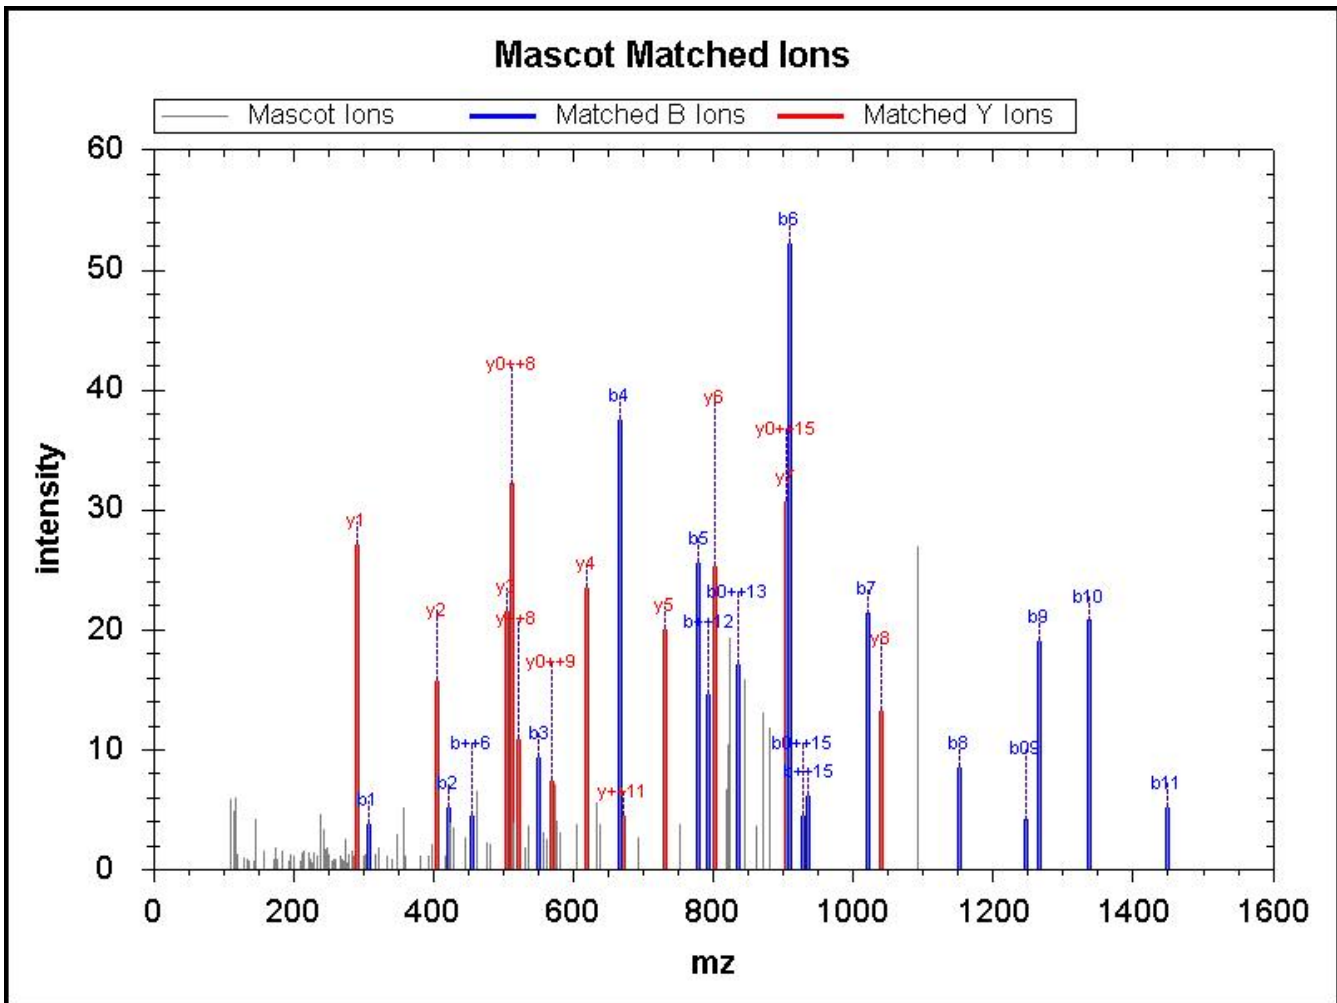

| No | b               | b++           | b*       | b*++     | b0              | b0++          | Seq | y               | y++           | y*       | y*++     | y0       | y0++          | RevNo |
|----|-----------------|---------------|----------|----------|-----------------|---------------|-----|-----------------|---------------|----------|----------|----------|---------------|-------|
| 1  | <b>308.17</b>   | 154.59        |          |          |                 |               | Y   |                 |               |          |          |          |               | 19    |
| 2  | <b>422.22</b>   | 211.61        | 405.19   | 203.10   |                 |               | N   | 2,182.17        | 1,091.59      | 2,165.15 | 1,083.08 | 2,164.16 | 1,082.58      | 18    |
| 3  | <b>551.26</b>   | 276.13        | 534.23   | 267.62   | 533.25          | 267.13        | E   | 2,068.13        | 1,034.57      | 2,051.10 | 1,026.06 | 2,050.12 | 1,025.56      | 17    |
| 4  | <b>666.29</b>   | 333.65        | 649.26   | 325.13   | 648.27          | 324.64        | D   | 1,939.09        | 970.05        | 1,922.06 | 961.53   | 1,921.08 | 961.04        | 16    |
| 5  | <b>779.37</b>   | 390.19        | 762.34   | 381.67   | 761.36          | 381.18        | L   | 1,824.06        | 912.53        | 1,807.03 | 904.02   | 1,806.05 | <b>903.53</b> | 15    |
| 6  | <b>908.41</b>   | <b>454.71</b> | 891.39   | 446.20   | 890.40          | 445.70        | E   | 1,710.98        | 855.99        | 1,693.95 | 847.48   | 1,692.97 | 846.99        | 14    |
| 7  | <b>1,021.50</b> | 511.25        | 1,004.47 | 502.74   | 1,003.49        | 502.25        | L   | 1,581.93        | 791.47        | 1,564.91 | 782.96   | 1,563.92 | 782.46        | 13    |
| 8  | <b>1,150.54</b> | 575.77        | 1,133.51 | 567.26   | 1,132.53        | 566.77        | E   | 1,468.85        | 734.93        | 1,451.82 | 726.41   | 1,450.84 | 725.92        | 12    |
| 9  | <b>1,265.57</b> | 633.29        | 1,248.54 | 624.77   | <b>1,247.55</b> | 624.28        | D   | 1,339.81        | <b>670.41</b> | 1,322.78 | 661.89   | 1,321.80 | 661.40        | 11    |
| 10 | <b>1,336.60</b> | 668.80        | 1,319.58 | 660.29   | 1,318.59        | 659.80        | A   | 1,224.78        | 612.89        | 1,207.75 | 604.38   | 1,206.77 | 603.89        | 10    |
| 11 | <b>1,449.69</b> | 725.35        | 1,432.66 | 716.83   | 1,431.68        | 716.34        | I   | 1,153.74        | 577.37        | 1,136.72 | 568.86   | 1,135.73 | <b>568.37</b> | 9     |
| 12 | 1,586.75        | <b>793.88</b> | 1,569.72 | 785.36   | 1,568.73        | 784.87        | H   | <b>1,040.66</b> | <b>520.83</b> | 1,023.63 | 512.32   | 1,022.65 | <b>511.83</b> | 8     |
| 13 | 1,687.79        | 844.40        | 1,670.77 | 835.89   | 1,669.78        | <b>835.40</b> | T   | <b>903.60</b>   | 452.30        | 886.57   | 443.79   | 885.59   | 443.30        | 7     |
| 14 | 1,758.83        | 879.92        | 1,741.80 | 871.41   | 1,740.82        | 870.91        | A   | <b>802.55</b>   | 401.78        | 785.53   | 393.27   | 784.54   | 392.77        | 6     |
| 15 | 1,871.91        | <b>936.46</b> | 1,854.89 | 927.95   | 1,853.90        | <b>927.46</b> | I   | <b>731.51</b>   | 366.26        | 714.49   | 357.75   | 713.50   | 357.26        | 5     |
| 16 | 1,985.00        | 993.00        | 1,967.97 | 984.49   | 1,966.99        | 984.00        | L   | <b>618.43</b>   | 309.72        | 601.40   | 301.21   | 600.42   | 300.71        | 4     |
| 17 | 2,086.05        | 1,043.53      | 2,069.02 | 1,035.01 | 2,068.04        | 1,034.52      | T   | <b>505.35</b>   | 253.18        | 488.32   | 244.66   | 487.34   | 244.17        | 3     |
| 18 | 2,199.13        | 1,100.07      | 2,182.10 | 1,091.56 | 2,181.12        | 1,091.06      | L   | <b>404.30</b>   | 202.65        | 387.27   | 194.14   |          |               | 2     |
| 19 |                 |               |          |          |                 |               | K   | <b>291.21</b>   | 146.11        | 274.19   | 137.60   |          |               | 1     |

Query 1896 Hit 1

MS/MS Fragmentation of **GFLEFVEDFIQVPR**

Found in **sp|P51114|FXR1\_HUMAN**, Fragile X mental retardation syndrome-related protein 1 OS=Homo sapiens GN=FXR1 PE=1 SV=3

Match to Query 1896: 1838.974from(920.4941,2+)

Title: 1297: Sum of 2 scans in range 3293 (rt=82.1891, f=4, i=920) to 3294 (rt=82.2145, f=4, i=921)

[D:\lab212\membrane\Grace\20120305-iTRAQ-1.raw]

Data File:

**Monoisotopic mass of neutral peptide Mr(calc): 1838.974**

**Variable modifications:**

**Ions Score: 97.35 Expect: 0.000**

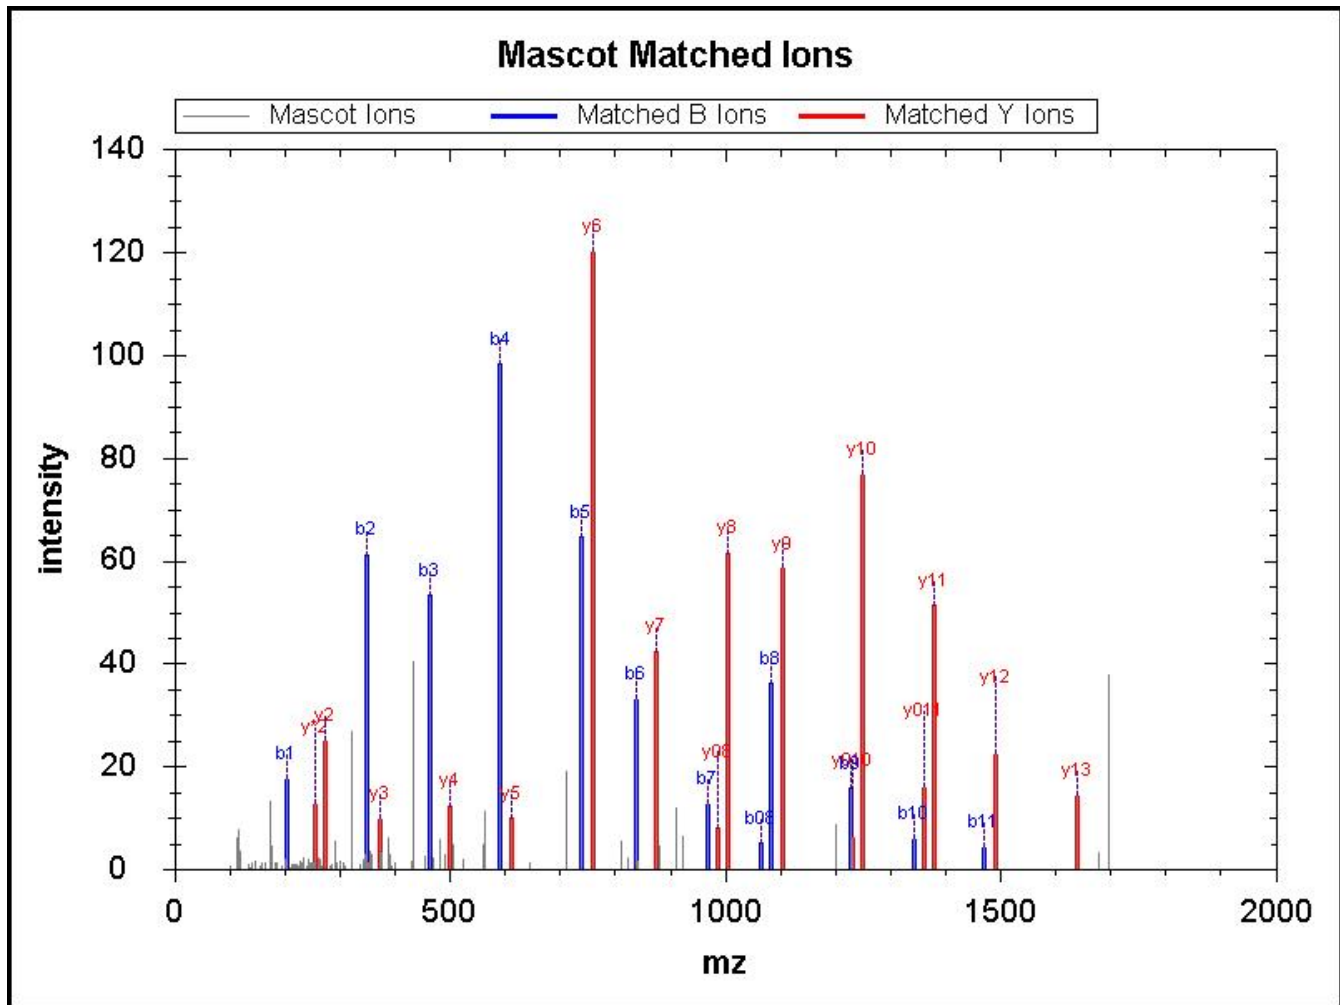

| No | b        | b++    | b*       | b*++   | b0       | b0++   | Seq | y        | y++    | y*       | y*++   | y0       | y0++   | RevNo |
|----|----------|--------|----------|--------|----------|--------|-----|----------|--------|----------|--------|----------|--------|-------|
| 1  | 202.13   | 101.57 |          |        |          |        | G   |          |        |          |        |          |        | 14    |
| 2  | 349.20   | 175.10 |          |        |          |        | F   | 1,638.85 | 819.93 | 1,621.83 | 811.42 | 1,620.84 | 810.92 | 13    |
| 3  | 462.28   | 231.65 |          |        |          |        | L   | 1,491.78 | 746.40 | 1,474.76 | 737.88 | 1,473.77 | 737.39 | 12    |
| 4  | 591.33   | 296.17 |          |        | 573.32   | 287.16 | E   | 1,378.70 | 689.85 | 1,361.67 | 681.34 | 1,360.69 | 680.85 | 11    |
| 5  | 738.39   | 369.70 |          |        | 720.38   | 360.70 | F   | 1,249.66 | 625.33 | 1,232.63 | 616.82 | 1,231.65 | 616.33 | 10    |
| 6  | 837.46   | 419.23 |          |        | 819.45   | 410.23 | V   | 1,102.59 | 551.80 | 1,085.56 | 543.28 | 1,084.58 | 542.79 | 9     |
| 7  | 966.51   | 483.76 |          |        | 948.49   | 474.75 | E   | 1,003.52 | 502.26 | 986.49   | 493.75 | 985.51   | 493.26 | 8     |
| 8  | 1,081.53 | 541.27 |          |        | 1,063.52 | 532.26 | D   | 874.48   | 437.74 | 857.45   | 429.23 | 856.47   | 428.74 | 7     |
| 9  | 1,228.60 | 614.80 |          |        | 1,210.59 | 605.80 | F   | 759.45   | 380.23 | 742.42   | 371.72 |          |        | 6     |
| 10 | 1,341.68 | 671.35 |          |        | 1,323.67 | 662.34 | I   | 612.38   | 306.70 | 595.36   | 298.18 |          |        | 5     |
| 11 | 1,469.74 | 735.38 | 1,452.72 | 726.86 | 1,451.73 | 726.37 | Q   | 499.30   | 250.15 | 482.27   | 241.64 |          |        | 4     |
| 12 | 1,568.81 | 784.91 | 1,551.79 | 776.40 | 1,550.80 | 775.90 | V   | 371.24   | 186.12 | 354.21   | 177.61 |          |        | 3     |
| 13 | 1,665.86 | 833.44 | 1,648.84 | 824.92 | 1,647.85 | 824.43 | P   | 272.17   | 136.59 | 255.15   | 128.08 |          |        | 2     |
| 14 |          |        |          |        |          |        | R   | 175.12   | 88.06  | 158.09   | 79.55  |          |        | 1     |

Query 1984 Hit 1

MS/MS Fragmentation of **LQAILEDIQVTLFTR**

Found in **sp|P07814|SYEP\_HUMAN**, Bifunctional glutamate/proline--tRNA ligase OS=Homo sapiens GN=EPRS PE=1 SV=5

Match to Query 1984: 1903.095from(952.5549,2+)

Title: 1312: Scan 3335 (rt=83.1339, f=3, i=476) [D:\lab212\membrane\Grace\20120305-iTRAQ-1.raw]

Data File:

**Monoisotopic mass of neutral peptide Mr(calc):** 1903.095

**Variable modifications:**

**Ions Score:** 92.2 **Expect:** 0.000

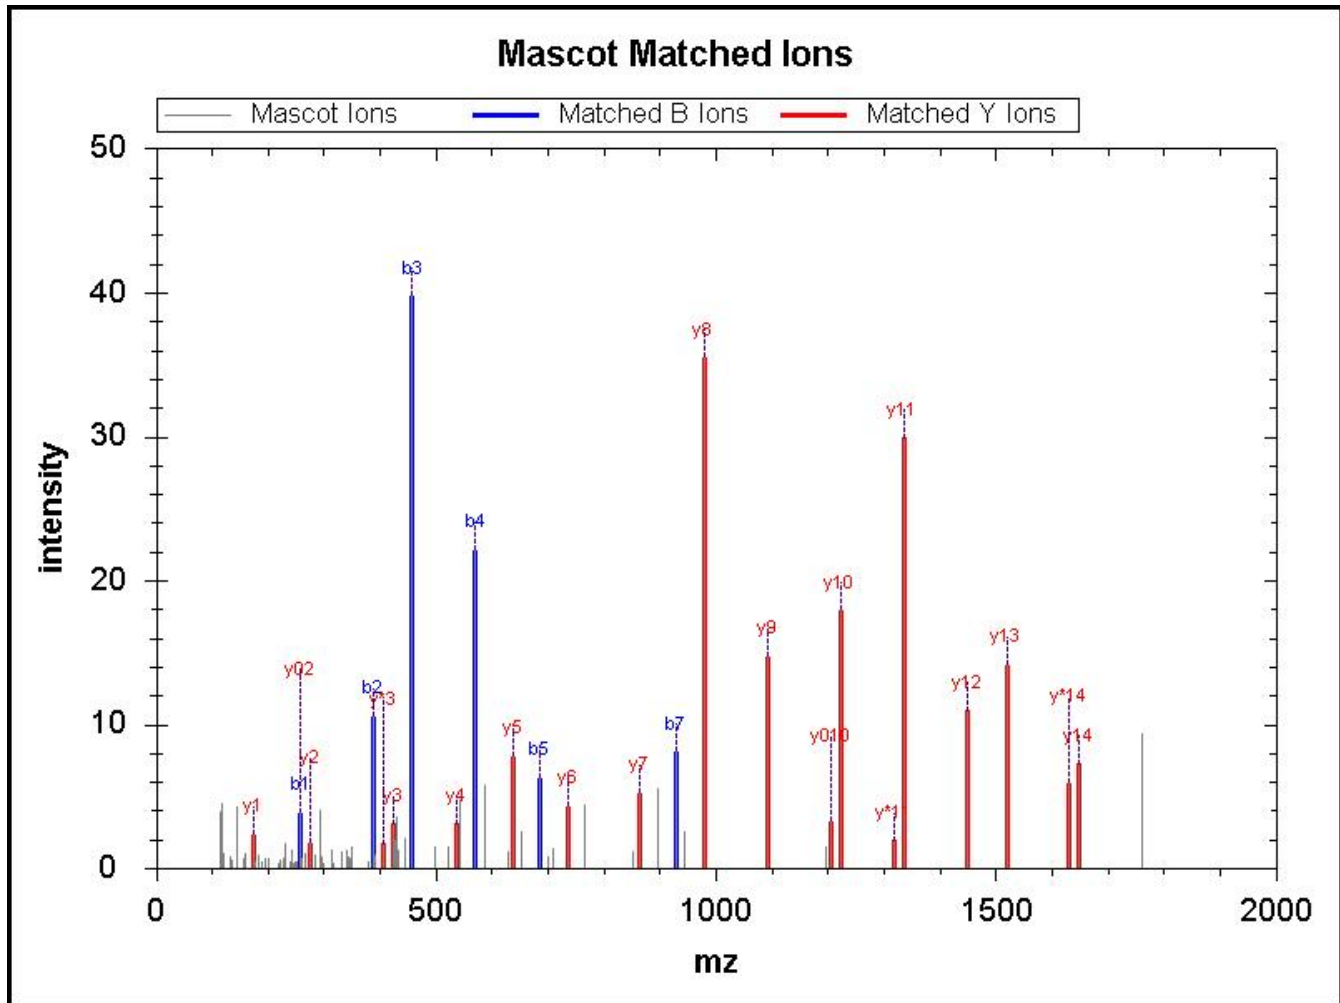

| No | b        | b++    | b*       | b*++   | b0       | b0++   | Seq | y        | y++    | y*       | y*++   | y0       | y0++   | RevNo |
|----|----------|--------|----------|--------|----------|--------|-----|----------|--------|----------|--------|----------|--------|-------|
| 1  | 258.19   | 129.60 |          |        |          |        | L   |          |        |          |        |          |        | 15    |
| 2  | 386.25   | 193.63 | 369.23   | 185.12 |          |        | Q   | 1,646.91 | 823.96 | 1,629.88 | 815.45 | 1,628.90 | 814.95 | 14    |
| 3  | 457.29   | 229.15 | 440.26   | 220.63 |          |        | A   | 1,518.85 | 759.93 | 1,501.83 | 751.42 | 1,500.84 | 750.92 | 13    |
| 4  | 570.37   | 285.69 | 553.35   | 277.18 |          |        | I   | 1,447.82 | 724.41 | 1,430.79 | 715.90 | 1,429.80 | 715.41 | 12    |
| 5  | 683.46   | 342.23 | 666.43   | 333.72 |          |        | L   | 1,334.73 | 667.87 | 1,317.70 | 659.36 | 1,316.72 | 658.86 | 11    |
| 6  | 812.50   | 406.75 | 795.47   | 398.24 | 794.49   | 397.75 | E   | 1,221.65 | 611.33 | 1,204.62 | 602.81 | 1,203.64 | 602.32 | 10    |
| 7  | 927.53   | 464.27 | 910.50   | 455.75 | 909.52   | 455.26 | D   | 1,092.60 | 546.81 | 1,075.58 | 538.29 | 1,074.59 | 537.80 | 9     |
| 8  | 1,040.61 | 520.81 | 1,023.58 | 512.30 | 1,022.60 | 511.80 | I   | 977.58   | 489.29 | 960.55   | 480.78 | 959.57   | 480.29 | 8     |
| 9  | 1,168.67 | 584.84 | 1,151.64 | 576.33 | 1,150.66 | 575.83 | Q   | 864.49   | 432.75 | 847.47   | 424.24 | 846.48   | 423.75 | 7     |
| 10 | 1,267.74 | 634.37 | 1,250.71 | 625.86 | 1,249.73 | 625.37 | V   | 736.44   | 368.72 | 719.41   | 360.21 | 718.42   | 359.72 | 6     |
| 11 | 1,368.79 | 684.90 | 1,351.76 | 676.38 | 1,350.77 | 675.89 | T   | 637.37   | 319.19 | 620.34   | 310.67 | 619.36   | 310.18 | 5     |
| 12 | 1,481.87 | 741.44 | 1,464.84 | 732.93 | 1,463.86 | 732.43 | L   | 536.32   | 268.66 | 519.29   | 260.15 | 518.31   | 259.66 | 4     |
| 13 | 1,628.94 | 814.97 | 1,611.91 | 806.46 | 1,610.93 | 805.97 | F   | 423.24   | 212.12 | 406.21   | 203.61 | 405.22   | 203.12 | 3     |
| 14 | 1,729.99 | 865.50 | 1,712.96 | 856.98 | 1,711.98 | 856.49 | T   | 276.17   | 138.59 | 259.14   | 130.07 | 258.16   | 129.58 | 2     |
| 15 |          |        |          |        |          |        | R   | 175.12   | 88.06  | 158.09   | 79.55  |          |        | 1     |

Query 1877 Hit 1

MS/MS Fragmentation of **ILEPGLNIIIPVLDR**

Found in **sp|Q9UJZI|STML2\_HUMAN**, Stomatin-like protein 2 OS=Homo sapiens GN=STOML2 PE=1 SV=1

Match to Query 1877: 1818.116from(910.0654,2+)

Title: 1149: Sum of 2 scans in range 2792 (rt=71.3506, f=4, i=792) to 2793 (rt=71.376, f=4, i=793)

[D:\lab212\membrane\Grace\20120305-iTRAQ-2.raw]

Data File:

**Monoisotopic mass of neutral peptide Mr(calc): 1818.116**

**Variable modifications:**

**Ions Score: 88.19 Expect: 0.000**

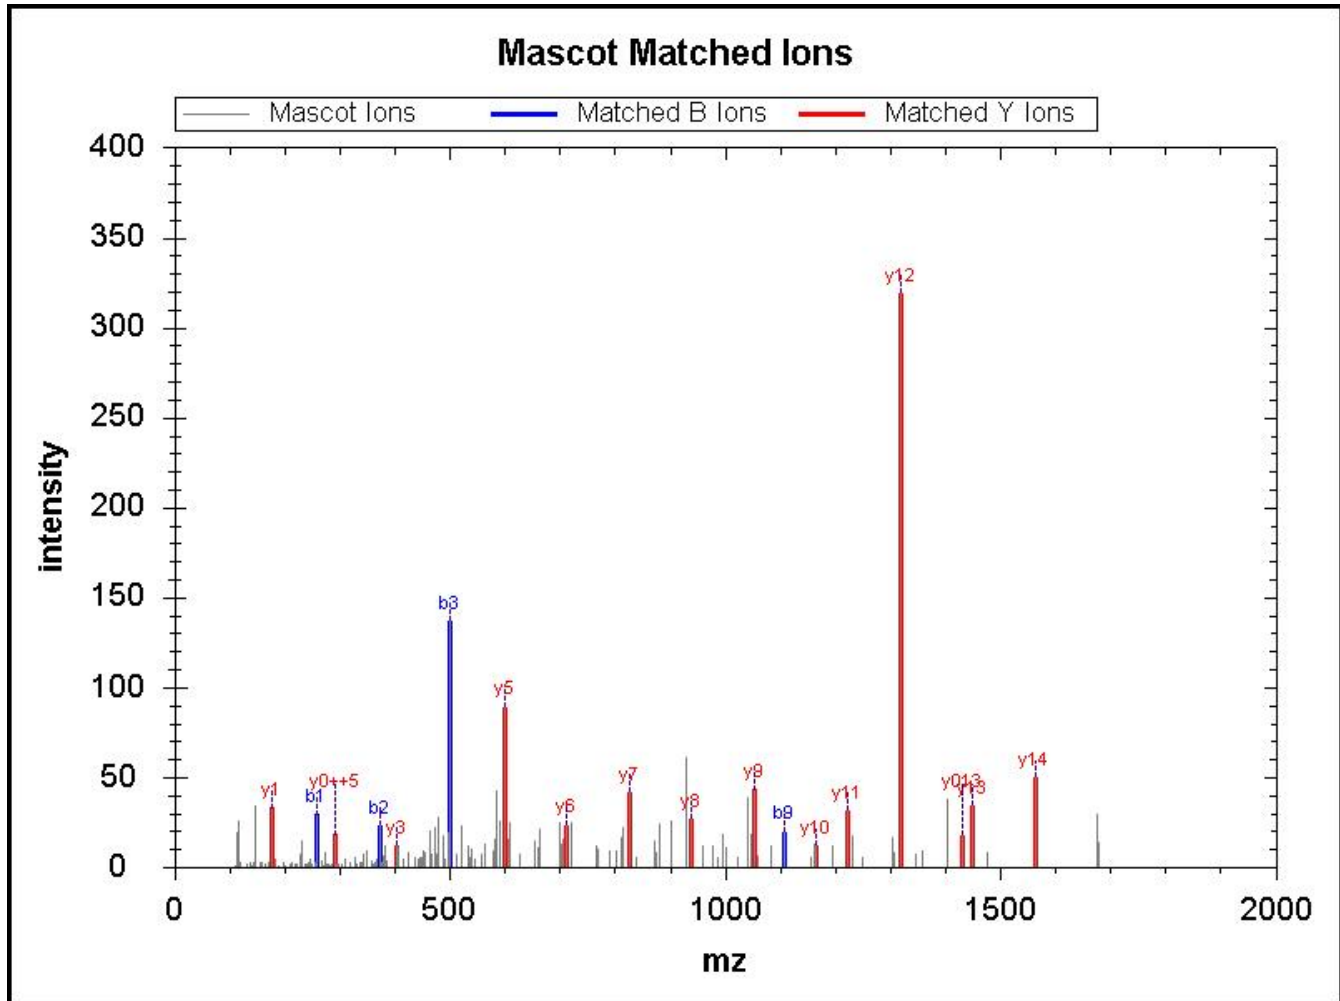

| No | b               | b++    | b*       | b*++   | b0       | b0++   | Seq | y               | y++    | y*       | y*++   | y0              | y0++          | RevNo |
|----|-----------------|--------|----------|--------|----------|--------|-----|-----------------|--------|----------|--------|-----------------|---------------|-------|
| 1  | <b>258.19</b>   | 129.60 |          |        |          |        | I   |                 |        |          |        |                 |               | 15    |
| 2  | <b>371.28</b>   | 186.14 |          |        |          |        | L   | <b>1,561.93</b> | 781.47 | 1,544.90 | 772.96 | 1,543.92        | 772.46        | 14    |
| 3  | <b>500.32</b>   | 250.66 |          |        | 482.31   | 241.66 | E   | <b>1,448.85</b> | 724.93 | 1,431.82 | 716.41 | <b>1,430.84</b> | 715.92        | 13    |
| 4  | 597.37          | 299.19 |          |        | 579.36   | 290.18 | P   | <b>1,319.80</b> | 660.41 | 1,302.78 | 651.89 | 1,301.79        | 651.40        | 12    |
| 5  | 654.39          | 327.70 |          |        | 636.38   | 318.70 | G   | <b>1,222.75</b> | 611.88 | 1,205.73 | 603.37 | 1,204.74        | 602.87        | 11    |
| 6  | 767.48          | 384.24 |          |        | 749.47   | 375.24 | L   | <b>1,165.73</b> | 583.37 | 1,148.70 | 574.86 | 1,147.72        | 574.36        | 10    |
| 7  | 881.52          | 441.26 | 864.49   | 432.75 | 863.51   | 432.26 | N   | <b>1,052.65</b> | 526.83 | 1,035.62 | 518.31 | 1,034.64        | 517.82        | 9     |
| 8  | 994.61          | 497.81 | 977.58   | 489.29 | 976.59   | 488.80 | I   | <b>938.60</b>   | 469.81 | 921.58   | 461.29 | 920.59          | 460.80        | 8     |
| 9  | <b>1,107.69</b> | 554.35 | 1,090.66 | 545.84 | 1,089.68 | 545.34 | L   | <b>825.52</b>   | 413.26 | 808.49   | 404.75 | 807.51          | 404.26        | 7     |
| 10 | 1,220.77        | 610.89 | 1,203.75 | 602.38 | 1,202.76 | 601.89 | I   | <b>712.44</b>   | 356.72 | 695.41   | 348.21 | 694.42          | 347.72        | 6     |
| 11 | 1,317.83        | 659.42 | 1,300.80 | 650.90 | 1,299.82 | 650.41 | P   | <b>599.35</b>   | 300.18 | 582.32   | 291.67 | 581.34          | <b>291.17</b> | 5     |
| 12 | 1,416.89        | 708.95 | 1,399.87 | 700.44 | 1,398.88 | 699.95 | V   | 502.30          | 251.65 | 485.27   | 243.14 | 484.29          | 242.65        | 4     |
| 13 | 1,529.98        | 765.49 | 1,512.95 | 756.98 | 1,511.97 | 756.49 | L   | <b>403.23</b>   | 202.12 | 386.20   | 193.61 | 385.22          | 193.11        | 3     |
| 14 | 1,645.01        | 823.01 | 1,627.98 | 814.49 | 1,627.00 | 814.00 | D   | 290.15          | 145.58 | 273.12   | 137.06 | 272.14          | 136.57        | 2     |
| 15 |                 |        |          |        |          |        | R   | <b>175.12</b>   | 88.06  | 158.09   | 79.55  |                 |               | 1     |

MS/MS Fragmentation of **EIADLGEALATAVIPQWQK**

Found in **sp|P49588|SYAC\_HUMAN**, Alanine--tRNA ligase

Match to Query 2488: 2340.3from(781.1071,3+)

Title: 1071: Sum of 2 scans in range 2753 (rt=70.023, f=4, i=746) to 2754 (rt=70.0484, f=4, i=747)

[D:\lab212\membrane\Grace\20120305-iTRAQ-1.raw]

Data File:

**Monoisotopic mass of neutral peptide Mr(calc): 2340.3**

**Variable modifications:**

**K19** iTRAQ4plex (K)

**Ions Score: 87.59 Expect: 0.000**

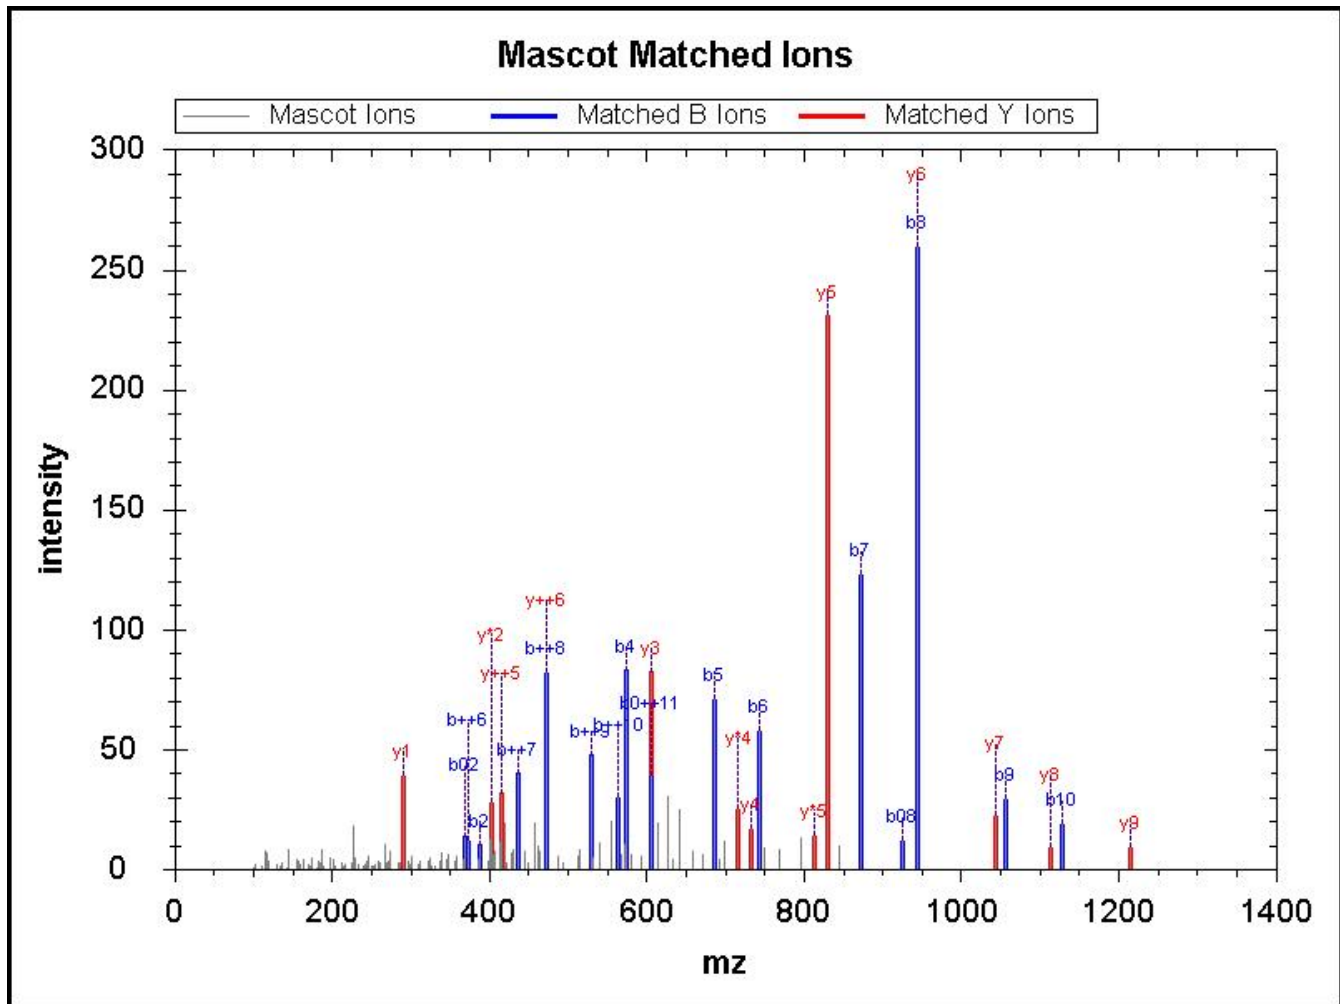

| No | b               | b++           | b* | b*++ | b0            | b0++          | Seq | y               | y++           | y*            | y*++     | y0       | y0++     | RevNo |
|----|-----------------|---------------|----|------|---------------|---------------|-----|-----------------|---------------|---------------|----------|----------|----------|-------|
| 1  | 274.15          | 137.58        |    |      | 256.14        | 128.57        | E   |                 |               |               |          |          |          | 19    |
| 2  | <b>387.24</b>   | 194.12        |    |      | <b>369.23</b> | 185.12        | I   | 2,068.16        | 1,034.58      | 2,051.13      | 1,026.07 | 2,050.15 | 1,025.58 | 18    |
| 3  | 458.27          | 229.64        |    |      | 440.26        | 220.63        | A   | 1,955.07        | 978.04        | 1,938.05      | 969.53   | 1,937.06 | 969.03   | 17    |
| 4  | <b>573.30</b>   | 287.15        |    |      | 555.29        | 278.15        | D   | 1,884.03        | 942.52        | 1,867.01      | 934.01   | 1,866.02 | 933.52   | 16    |
| 5  | <b>686.38</b>   | 343.70        |    |      | 668.37        | 334.69        | L   | 1,769.01        | 885.01        | 1,751.98      | 876.49   | 1,751.00 | 876.00   | 15    |
| 6  | <b>743.41</b>   | <b>372.21</b> |    |      | 725.39        | 363.20        | G   | 1,655.92        | 828.47        | 1,638.90      | 819.95   | 1,637.91 | 819.46   | 14    |
| 7  | <b>872.45</b>   | <b>436.73</b> |    |      | 854.44        | 427.72        | E   | 1,598.90        | 799.95        | 1,581.88      | 791.44   | 1,580.89 | 790.95   | 13    |
| 8  | <b>943.49</b>   | <b>472.25</b> |    |      | <b>925.47</b> | 463.24        | A   | 1,469.86        | 735.43        | 1,452.83      | 726.92   | 1,451.85 | 726.43   | 12    |
| 9  | <b>1,056.57</b> | <b>528.79</b> |    |      | 1,038.56      | 519.78        | L   | 1,398.82        | 699.91        | 1,381.80      | 691.40   | 1,380.81 | 690.91   | 11    |
| 10 | <b>1,127.61</b> | <b>564.31</b> |    |      | 1,109.60      | 555.30        | A   | 1,285.74        | 643.37        | 1,268.71      | 634.86   | 1,267.73 | 634.37   | 10    |
| 11 | 1,228.65        | 614.83        |    |      | 1,210.64      | <b>605.83</b> | T   | <b>1,214.70</b> | 607.85        | 1,197.67      | 599.34   | 1,196.69 | 598.85   | 9     |
| 12 | 1,299.69        | 650.35        |    |      | 1,281.68      | 641.34        | A   | <b>1,113.65</b> | 557.33        | 1,096.63      | 548.82   |          |          | 8     |
| 13 | 1,398.76        | 699.88        |    |      | 1,380.75      | 690.88        | V   | <b>1,042.62</b> | 521.81        | 1,025.59      | 513.30   |          |          | 7     |
| 14 | 1,511.84        | 756.43        |    |      | 1,493.83      | 747.42        | I   | <b>943.55</b>   | <b>472.28</b> | 926.52        | 463.76   |          |          | 6     |
| 15 | 1,608.90        | 804.95        |    |      | 1,590.89      | 795.95        | P   | <b>830.46</b>   | <b>415.74</b> | <b>813.44</b> | 407.22   |          |          | 5     |

|    |          |          |          |          |          |          |   |        |        |        |        |  |  |   |
|----|----------|----------|----------|----------|----------|----------|---|--------|--------|--------|--------|--|--|---|
| 16 | 1,736.96 | 868.98   | 1,719.93 | 860.47   | 1,718.94 | 859.98   | Q | 733.41 | 367.21 | 716.38 | 358.70 |  |  | 4 |
| 17 | 1,923.03 | 962.02   | 1,906.01 | 953.51   | 1,905.02 | 953.02   | W | 605.35 | 303.18 | 588.33 | 294.67 |  |  | 3 |
| 18 | 2,051.09 | 1,026.05 | 2,034.07 | 1,017.54 | 2,033.08 | 1,017.04 | Q | 419.27 | 210.14 | 402.25 | 201.63 |  |  | 2 |
| 19 |          |          |          |          |          |          | K | 291.21 | 146.11 | 274.19 | 137.60 |  |  | 1 |

Query 2722 Hit 1

MS/MS Fragmentation of **EQHDALEFFNSLVDSLDEALK**

Found in **sp|Q93008|USP9X\_HUMAN**, Probable ubiquitin carboxyl-terminal hydrolase FAF-X OS=Homo sapiens GN=USP9X PE=1 SV=3

Match to Query 2722: 2707.373 from (903.4651, 3+)

Title: 1306: Scan 3323 (rt=82.8623, f=3, i=474) [D:\lab212\membrane\Grace\20120305-iTRAQ-1.raw]

Data File:

**Monoisotopic mass of neutral peptide Mr(calc): 2707.373**

**Variable modifications:**

**K21** iTRAQ4plex (K)

**Ions Score: 85.86 Expect: 0.000**

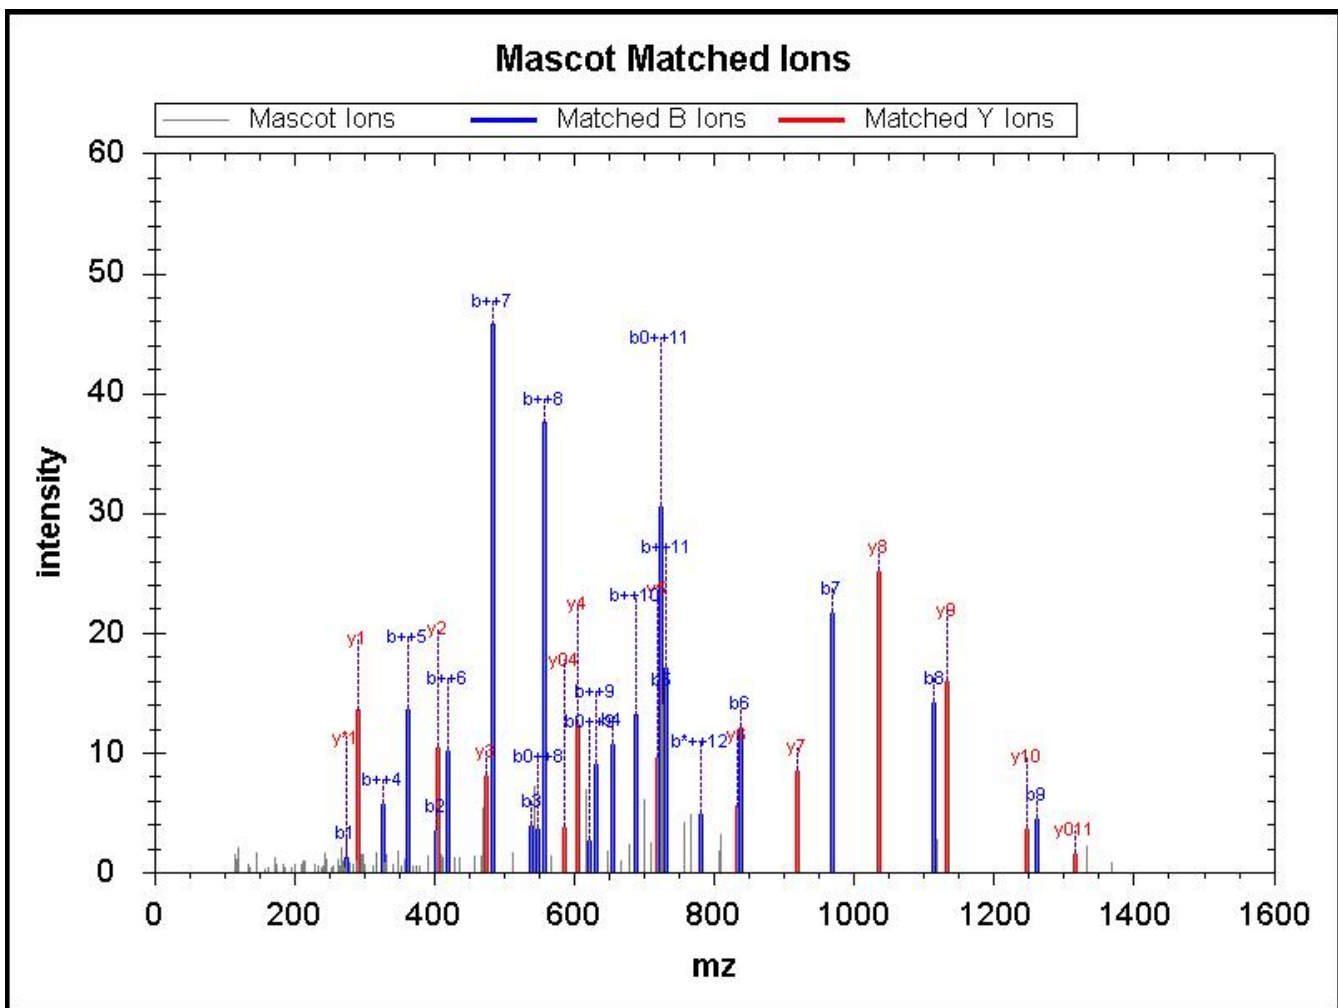

| No | b        | b++    | b*       | b*++   | b0       | b0++   | Seq | y        | y++      | y*       | y*++     | y0       | y0++     | RevNo |
|----|----------|--------|----------|--------|----------|--------|-----|----------|----------|----------|----------|----------|----------|-------|
| 1  | 274.15   | 137.58 |          |        | 256.14   | 128.57 | E   |          |          |          |          |          |          | 21    |
| 2  | 402.21   | 201.61 | 385.18   | 193.10 | 384.20   | 192.60 | Q   | 2,435.22 | 1,218.11 | 2,418.19 | 1,209.60 | 2,417.21 | 1,209.11 | 20    |
| 3  | 539.27   | 270.14 | 522.24   | 261.63 | 521.26   | 261.13 | H   | 2,307.16 | 1,154.08 | 2,290.14 | 1,145.57 | 2,289.15 | 1,145.08 | 19    |
| 4  | 654.30   | 327.65 | 637.27   | 319.14 | 636.29   | 318.65 | D   | 2,170.10 | 1,085.56 | 2,153.08 | 1,077.04 | 2,152.09 | 1,076.55 | 18    |
| 5  | 725.33   | 363.17 | 708.31   | 354.66 | 707.32   | 354.17 | A   | 2,055.08 | 1,028.04 | 2,038.05 | 1,019.53 | 2,037.07 | 1,019.04 | 17    |
| 6  | 838.42   | 419.71 | 821.39   | 411.20 | 820.41   | 410.71 | L   | 1,984.04 | 992.52   | 1,967.01 | 984.01   | 1,966.03 | 983.52   | 16    |
| 7  | 967.46   | 484.23 | 950.43   | 475.72 | 949.45   | 475.23 | E   | 1,870.96 | 935.98   | 1,853.93 | 927.47   | 1,852.94 | 926.98   | 15    |
| 8  | 1,114.53 | 557.77 | 1,097.50 | 549.25 | 1,096.52 | 548.76 | F   | 1,741.91 | 871.46   | 1,724.89 | 862.95   | 1,723.90 | 862.45   | 14    |
| 9  | 1,261.60 | 631.30 | 1,244.57 | 622.79 | 1,243.59 | 622.30 | F   | 1,594.84 | 797.93   | 1,577.82 | 789.41   | 1,576.83 | 788.92   | 13    |

|    |          |          |          |          |          |          |   |          |        |          |        |          |        |    |
|----|----------|----------|----------|----------|----------|----------|---|----------|--------|----------|--------|----------|--------|----|
| 10 | 1,375.64 | 688.32   | 1,358.61 | 679.81   | 1,357.63 | 679.32   | N | 1,447.78 | 724.39 | 1,430.75 | 715.88 | 1,429.77 | 715.39 | 12 |
| 11 | 1,462.67 | 731.84   | 1,445.65 | 723.33   | 1,444.66 | 722.83   | S | 1,333.73 | 667.37 | 1,316.71 | 658.86 | 1,315.72 | 658.36 | 11 |
| 12 | 1,575.76 | 788.38   | 1,558.73 | 779.87   | 1,557.75 | 779.38   | L | 1,246.70 | 623.85 | 1,229.67 | 615.34 | 1,228.69 | 614.85 | 10 |
| 13 | 1,674.82 | 837.92   | 1,657.80 | 829.40   | 1,656.81 | 828.91   | V | 1,133.62 | 567.31 | 1,116.59 | 558.80 | 1,115.61 | 558.31 | 9  |
| 14 | 1,789.85 | 895.43   | 1,772.82 | 886.92   | 1,771.84 | 886.42   | D | 1,034.55 | 517.78 | 1,017.52 | 509.26 | 1,016.54 | 508.77 | 8  |
| 15 | 1,876.88 | 938.95   | 1,859.86 | 930.43   | 1,858.87 | 929.94   | S | 919.52   | 460.26 | 902.50   | 451.75 | 901.51   | 451.26 | 7  |
| 16 | 1,989.97 | 995.49   | 1,972.94 | 986.97   | 1,971.96 | 986.48   | L | 832.49   | 416.75 | 815.46   | 408.24 | 814.48   | 407.74 | 6  |
| 17 | 2,104.99 | 1,053.00 | 2,087.97 | 1,044.49 | 2,086.98 | 1,044.00 | D | 719.41   | 360.21 | 702.38   | 351.69 | 701.39   | 351.20 | 5  |
| 18 | 2,234.04 | 1,117.52 | 2,217.01 | 1,109.01 | 2,216.03 | 1,108.52 | E | 604.38   | 302.69 | 587.35   | 294.18 | 586.37   | 293.69 | 4  |
| 19 | 2,305.07 | 1,153.04 | 2,288.05 | 1,144.53 | 2,287.06 | 1,144.04 | A | 475.34   | 238.17 | 458.31   | 229.66 |          |        | 3  |
| 20 | 2,418.16 | 1,209.58 | 2,401.13 | 1,201.07 | 2,400.15 | 1,200.58 | L | 404.30   | 202.65 | 387.27   | 194.14 |          |        | 2  |
| 21 |          |          |          |          |          |          | K | 291.21   | 146.11 | 274.19   | 137.60 |          |        | 1  |

Query 2148 Hit 1

MS/MS Fragmentation of **VPADLGAEAGLQQLGALR**

Found in **sp|P35270|SPRE\_HUMAN**, Sepiapterin reductase OS=Homo sapiens GN=SPR PE=1 SV=1

Match to Query 2148: 2035.164from(679.3952,3+)

Title: 1073: Scan 2758 (rt=70.1334, f=3, i=383) [D:\lab212\membrane\Grace\20120305-iTRAQ-1.raw]

Data File:

**Monoisotopic mass of neutral peptide Mr(calc): 2035.164**

**Variable modifications:**

**Ions Score: 83.99 Expect: 0.000**

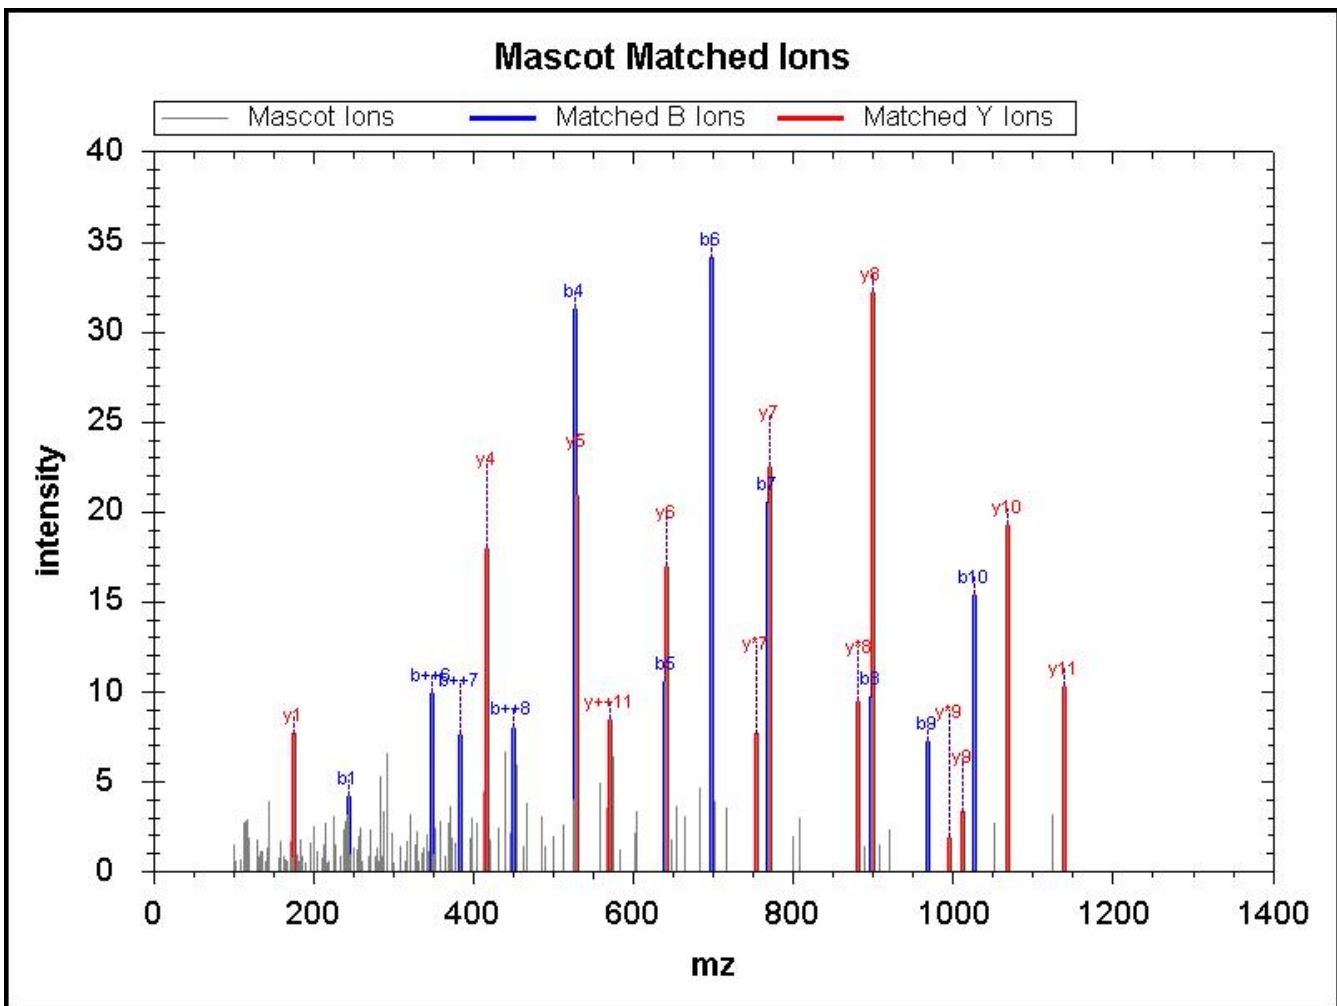

| No | b      | b++    | b* | b*++ | b0 | b0++ | Seq | y        | y++    | y*       | y*++   | y0       | y0++   | RevNo |
|----|--------|--------|----|------|----|------|-----|----------|--------|----------|--------|----------|--------|-------|
| 1  | 244.18 | 122.59 |    |      |    |      | V   |          |        |          |        |          |        | 19    |
| 2  | 341.23 | 171.12 |    |      |    |      | P   | 1,792.99 | 897.00 | 1,775.97 | 888.49 | 1,774.98 | 887.99 | 18    |
| 3  | 412.27 | 206.64 |    |      |    |      | A   | 1,695.94 | 848.47 | 1,678.91 | 839.96 | 1,677.93 | 839.47 | 17    |



|    |          |        |          |        |          |        |   |          |        |          |        |          |        |    |
|----|----------|--------|----------|--------|----------|--------|---|----------|--------|----------|--------|----------|--------|----|
| 4  | 527.29   | 264.15 |          |        | 509.28   | 255.15 | D | 1,624.90 | 812.95 | 1,607.88 | 804.44 | 1,606.89 | 803.95 | 16 |
| 5  | 640.38   | 320.69 |          |        | 622.37   | 311.69 | L | 1,509.87 | 755.44 | 1,492.85 | 746.93 | 1,491.86 | 746.44 | 15 |
| 6  | 697.40   | 349.20 |          |        | 679.39   | 340.20 | G | 1,396.79 | 698.90 | 1,379.76 | 690.39 | 1,378.78 | 689.89 | 14 |
| 7  | 768.44   | 384.72 |          |        | 750.43   | 375.72 | A | 1,339.77 | 670.39 | 1,322.74 | 661.88 | 1,321.76 | 661.38 | 13 |
| 8  | 897.48   | 449.24 |          |        | 879.47   | 440.24 | E | 1,268.73 | 634.87 | 1,251.71 | 626.36 | 1,250.72 | 625.86 | 12 |
| 9  | 968.52   | 484.76 |          |        | 950.51   | 475.76 | A | 1,139.69 | 570.35 | 1,122.66 | 561.84 |          |        | 11 |
| 10 | 1,025.54 | 513.27 |          |        | 1,007.53 | 504.27 | G | 1,068.65 | 534.83 | 1,051.63 | 526.32 |          |        | 10 |
| 11 | 1,138.62 | 569.81 |          |        | 1,120.61 | 560.81 | L | 1,011.63 | 506.32 | 994.60   | 497.81 |          |        | 9  |
| 12 | 1,266.68 | 633.84 | 1,249.65 | 625.33 | 1,248.67 | 624.84 | Q | 898.55   | 449.78 | 881.52   | 441.26 |          |        | 8  |
| 13 | 1,394.74 | 697.87 | 1,377.71 | 689.36 | 1,376.73 | 688.87 | Q | 770.49   | 385.75 | 753.46   | 377.23 |          |        | 7  |
| 14 | 1,507.82 | 754.42 | 1,490.80 | 745.90 | 1,489.81 | 745.41 | L | 642.43   | 321.72 | 625.40   | 313.21 |          |        | 6  |
| 15 | 1,620.91 | 810.96 | 1,603.88 | 802.44 | 1,602.90 | 801.95 | L | 529.35   | 265.18 | 512.32   | 256.66 |          |        | 5  |
| 16 | 1,677.93 | 839.47 | 1,660.90 | 830.96 | 1,659.92 | 830.46 | G | 416.26   | 208.63 | 399.24   | 200.12 |          |        | 4  |
| 17 | 1,748.97 | 874.99 | 1,731.94 | 866.47 | 1,730.96 | 865.98 | A | 359.24   | 180.12 | 342.21   | 171.61 |          |        | 3  |
| 18 | 1,862.05 | 931.53 | 1,845.02 | 923.02 | 1,844.04 | 922.52 | L | 288.20   | 144.61 | 271.18   | 136.09 |          |        | 2  |
| 19 |          |        |          |        |          |        | R | 175.12   | 88.06  | 158.09   | 79.55  |          |        | 1  |

Query 2630 Hit 1

MS/MS Fragmentation of **FLVLDEADGLLSQGYSDFINR**

Found in **sp|Q92499|DDX1\_HUMAN**, ATP-dependent RNA helicase DDX1 OS=Homo sapiens GN=DDX1 PE=1 SV=2

Match to Query 2630: 2515.292 from (839.4378, 3+)

Title: 1236: Sum of 2 scans in range 2997 (rt=75.9688, f=4, i=858) to 2998 (rt=75.9942, f=4, i=859)

[D:\lab212\membrane\Grace\20120305-iTRAQ-2.raw]

Data File:

**Monoisotopic mass of neutral peptide Mr(calc): 2515.292**

**Variable modifications:**

**Ions Score: 83.31 Expect: 0.000**

### Mascot Matched Ions

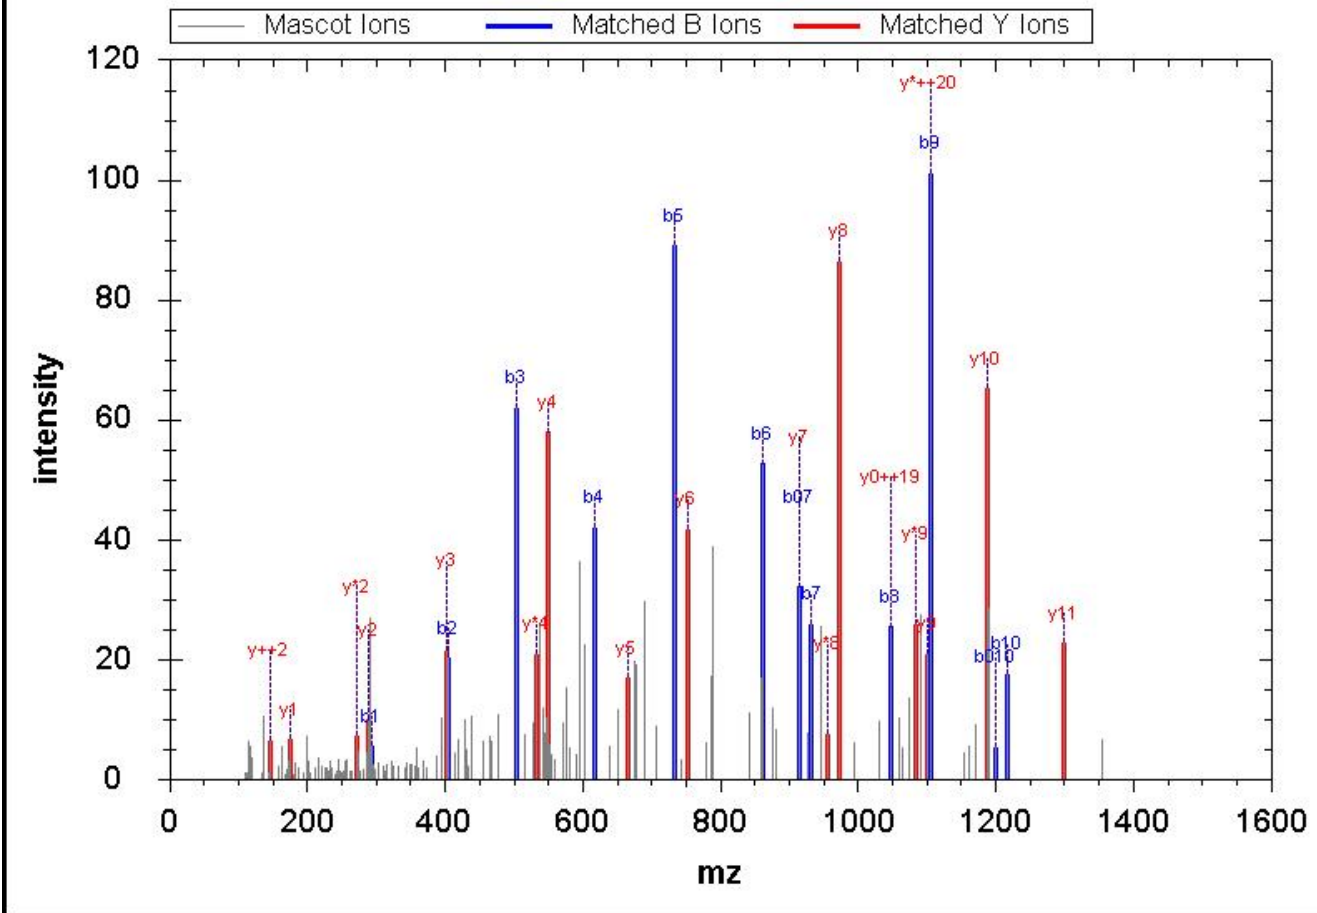

| No | b        | b++      | b*       | b*++     | b0       | b0++     | Seq | y        | y++      | y*       | y*++     | y0       | y0++     | RevNo |
|----|----------|----------|----------|----------|----------|----------|-----|----------|----------|----------|----------|----------|----------|-------|
| 1  | 292.18   | 146.59   |          |          |          |          | F   |          |          |          |          |          |          | 21    |
| 2  | 405.26   | 203.13   |          |          |          |          | L   | 2,225.11 | 1,113.06 | 2,208.08 | 1,104.54 | 2,207.10 | 1,104.05 | 20    |
| 3  | 504.33   | 252.67   |          |          |          |          | V   | 2,112.02 | 1,056.52 | 2,095.00 | 1,048.00 | 2,094.01 | 1,047.51 | 19    |
| 4  | 617.41   | 309.21   |          |          |          |          | L   | 2,012.96 | 1,006.98 | 1,995.93 | 998.47   | 1,994.95 | 997.98   | 18    |
| 5  | 732.44   | 366.72   |          |          | 714.43   | 357.72   | D   | 1,899.87 | 950.44   | 1,882.85 | 941.93   | 1,881.86 | 941.43   | 17    |
| 6  | 861.48   | 431.25   |          |          | 843.47   | 422.24   | E   | 1,784.85 | 892.93   | 1,767.82 | 884.41   | 1,766.83 | 883.92   | 16    |
| 7  | 932.52   | 466.76   |          |          | 914.51   | 457.76   | A   | 1,655.80 | 828.40   | 1,638.78 | 819.89   | 1,637.79 | 819.40   | 15    |
| 8  | 1,047.55 | 524.28   |          |          | 1,029.54 | 515.27   | D   | 1,584.77 | 792.89   | 1,567.74 | 784.37   | 1,566.75 | 783.88   | 14    |
| 9  | 1,104.57 | 552.79   |          |          | 1,086.56 | 543.78   | G   | 1,469.74 | 735.37   | 1,452.71 | 726.86   | 1,451.73 | 726.37   | 13    |
| 10 | 1,217.65 | 609.33   |          |          | 1,199.64 | 600.33   | L   | 1,412.72 | 706.86   | 1,395.69 | 698.35   | 1,394.71 | 697.86   | 12    |
| 11 | 1,330.74 | 665.87   |          |          | 1,312.73 | 656.87   | L   | 1,299.63 | 650.32   | 1,282.61 | 641.81   | 1,281.62 | 641.31   | 11    |
| 12 | 1,417.77 | 709.39   |          |          | 1,399.76 | 700.38   | S   | 1,186.55 | 593.78   | 1,169.52 | 585.26   | 1,168.54 | 584.77   | 10    |
| 13 | 1,545.83 | 773.42   | 1,528.80 | 764.90   | 1,527.82 | 764.41   | Q   | 1,099.52 | 550.26   | 1,082.49 | 541.75   | 1,081.51 | 541.26   | 9     |
| 14 | 1,602.85 | 801.93   | 1,585.82 | 793.42   | 1,584.84 | 792.92   | G   | 971.46   | 486.23   | 954.43   | 477.72   | 953.45   | 477.23   | 8     |
| 15 | 1,765.91 | 883.46   | 1,748.89 | 874.95   | 1,747.90 | 874.45   | Y   | 914.44   | 457.72   | 897.41   | 449.21   | 896.43   | 448.72   | 7     |
| 16 | 1,852.94 | 926.98   | 1,835.92 | 918.46   | 1,834.93 | 917.97   | S   | 751.37   | 376.19   | 734.35   | 367.68   | 733.36   | 367.18   | 6     |
| 17 | 1,967.97 | 984.49   | 1,950.95 | 975.98   | 1,949.96 | 975.48   | D   | 664.34   | 332.67   | 647.31   | 324.16   | 646.33   | 323.67   | 5     |
| 18 | 2,115.04 | 1,058.02 | 2,098.01 | 1,049.51 | 2,097.03 | 1,049.02 | F   | 549.31   | 275.16   | 532.29   | 266.65   |          |          | 4     |
| 19 | 2,228.12 | 1,114.57 | 2,211.10 | 1,106.05 | 2,210.11 | 1,105.56 | I   | 402.25   | 201.63   | 385.22   | 193.11   |          |          | 3     |
| 20 | 2,342.17 | 1,171.59 | 2,325.14 | 1,163.07 | 2,324.16 | 1,162.58 | N   | 289.16   | 145.08   | 272.14   | 136.57   |          |          | 2     |
| 21 |          |          |          |          |          |          | R   | 175.12   | 88.06    | 158.09   | 79.55    |          |          | 1     |

Query 1421 Hit 1

MS/MS Fragmentation of **LIALLEVLSQK**

Found in **sp|P21333|FLNA\_HUMAN**, Filamin-A OS=Homo sapiens GN=FLNA PE=1 SV=4  
 Match to Query 1421: 1513.98from(757.9973,2+)  
 Title: 1173: Scan 2852 (rt=72.6968, f=2, i=435) [D:\lab212\membrane\Grace\20120305-iTRAQ-2.raw]  
 Data File:  
**Monoisotopic mass of neutral peptide Mr(calc): 1513.98**  
**Variable modifications:**  
**K11** iTRAQ4plex (K)  
**Ions Score: 77.64 Expect: 0.000**

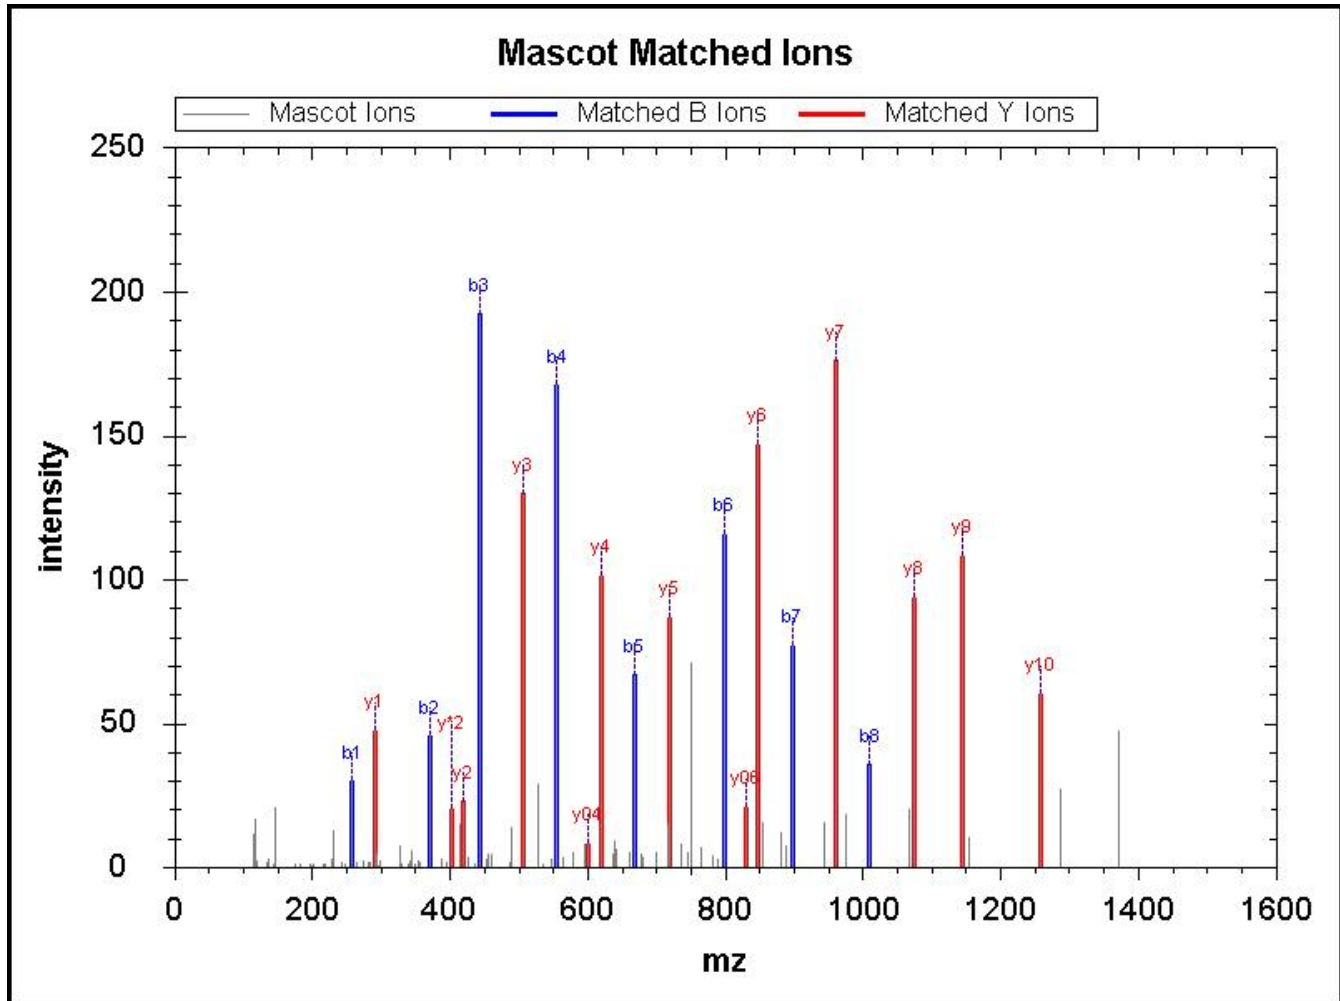

| No | b               | b++    | b*       | b*++   | b0       | b0++   | Seq | y               | y++    | y*            | y*++   | y0            | y0++   | RevNo |
|----|-----------------|--------|----------|--------|----------|--------|-----|-----------------|--------|---------------|--------|---------------|--------|-------|
| 1  | <b>258.19</b>   | 129.60 |          |        |          |        | L   |                 |        |               |        |               |        | 11    |
| 2  | <b>371.28</b>   | 186.14 |          |        |          |        | I   | <b>1,257.79</b> | 629.40 | 1,240.76      | 620.89 | 1,239.78      | 620.39 | 10    |
| 3  | <b>442.31</b>   | 221.66 |          |        |          |        | A   | <b>1,144.71</b> | 572.86 | 1,127.68      | 564.34 | 1,126.70      | 563.85 | 9     |
| 4  | <b>555.40</b>   | 278.20 |          |        |          |        | L   | <b>1,073.67</b> | 537.34 | 1,056.64      | 528.82 | 1,055.66      | 528.33 | 8     |
| 5  | <b>668.48</b>   | 334.74 |          |        |          |        | L   | <b>960.58</b>   | 480.80 | 943.56        | 472.28 | 942.57        | 471.79 | 7     |
| 6  | <b>797.53</b>   | 399.27 |          |        | 779.51   | 390.26 | E   | <b>847.50</b>   | 424.25 | 830.47        | 415.74 | <b>829.49</b> | 415.25 | 6     |
| 7  | <b>896.59</b>   | 448.80 |          |        | 878.58   | 439.80 | V   | <b>718.46</b>   | 359.73 | 701.43        | 351.22 | 700.45        | 350.73 | 5     |
| 8  | <b>1,009.68</b> | 505.34 |          |        | 991.67   | 496.34 | L   | <b>619.39</b>   | 310.20 | 602.36        | 301.69 | <b>601.38</b> | 301.19 | 4     |
| 9  | 1,096.71        | 548.86 |          |        | 1,078.70 | 539.85 | S   | <b>506.31</b>   | 253.66 | 489.28        | 245.14 | 488.29        | 244.65 | 3     |
| 10 | 1,224.77        | 612.89 | 1,207.74 | 604.37 | 1,206.76 | 603.88 | Q   | <b>419.27</b>   | 210.14 | <b>402.25</b> | 201.63 |               |        | 2     |
| 11 |                 |        |          |        |          |        | K   | <b>291.21</b>   | 146.11 | 274.19        | 137.60 |               |        | 1     |

Query 1638 Hit 1

**MS/MS Fragmentation of IIDFLSALEGFK**

Found in **sp|P52701|MSH6\_HUMAN**, DNA mismatch repair protein Msh6 OS=Homo sapiens GN=MSH6 PE=1 SV=2  
 Match to Query 1638: 1639.943from(820.9789,2+)  
 Title: 1196: Sum of 2 scans in range 3057 (rt=76.8723, f=4, i=844) to 3058 (rt=76.8977, f=4, i=845)  
 [D:\lab212\membrane\Grace\20120305-iTRAQ-1.raw]

Data File:

**Monoisotopic mass of neutral peptide Mr(calc):** 1639.943

**Variable modifications:**

**K12** iTRAQ4plex (K)

**Ions Score:** 76.84 **Expect:** 0.000

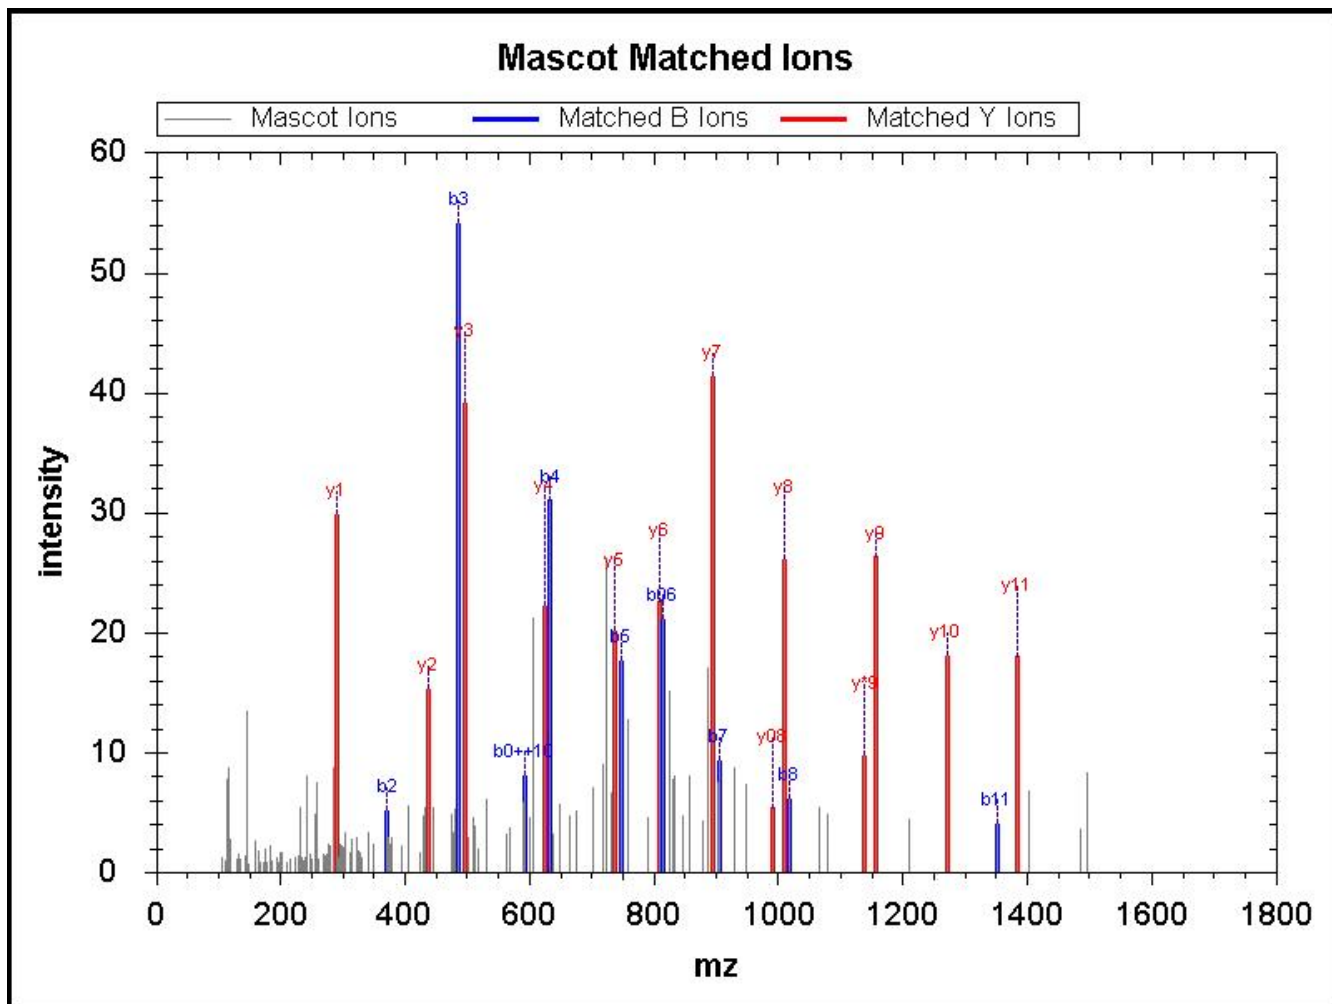

| No | b               | b++    | b0            | b0++          | Seq | y               | y++    | y*              | y*++   | y0            | y0++   | RevNo |
|----|-----------------|--------|---------------|---------------|-----|-----------------|--------|-----------------|--------|---------------|--------|-------|
| 1  | 258.19          | 129.60 |               |               | I   |                 |        |                 |        |               |        | 12    |
| 2  | <b>371.28</b>   | 186.14 |               |               | I   | <b>1,383.76</b> | 692.39 | 1,366.74        | 683.87 | 1,365.75      | 683.38 | 11    |
| 3  | <b>486.30</b>   | 243.66 | 468.29        | 234.65        | D   | <b>1,270.68</b> | 635.84 | 1,253.65        | 627.33 | 1,252.67      | 626.84 | 10    |
| 4  | <b>633.37</b>   | 317.19 | 615.36        | 308.18        | F   | <b>1,155.65</b> | 578.33 | <b>1,138.63</b> | 569.82 | 1,137.64      | 569.32 | 9     |
| 5  | <b>746.46</b>   | 373.73 | 728.45        | 364.73        | L   | <b>1,008.58</b> | 504.80 | 991.56          | 496.28 | <b>990.57</b> | 495.79 | 8     |
| 6  | 833.49          | 417.25 | <b>815.48</b> | 408.24        | S   | <b>895.50</b>   | 448.25 | 878.47          | 439.74 | 877.49        | 439.25 | 7     |
| 7  | <b>904.53</b>   | 452.77 | 886.52        | 443.76        | A   | <b>808.47</b>   | 404.74 | 791.44          | 396.22 | 790.46        | 395.73 | 6     |
| 8  | <b>1,017.61</b> | 509.31 | 999.60        | 500.30        | L   | <b>737.43</b>   | 369.22 | 720.40          | 360.71 | 719.42        | 360.21 | 5     |
| 9  | 1,146.65        | 573.83 | 1,128.64      | 564.82        | E   | <b>624.35</b>   | 312.68 | 607.32          | 304.16 | 606.34        | 303.67 | 4     |
| 10 | 1,203.67        | 602.34 | 1,185.66      | <b>593.34</b> | G   | <b>495.30</b>   | 248.16 | 478.28          | 239.64 |               |        | 3     |
| 11 | <b>1,350.74</b> | 675.88 | 1,332.73      | 666.87        | F   | <b>438.28</b>   | 219.65 | 421.26          | 211.13 |               |        | 2     |
| 12 |                 |        |               |               | K   | <b>291.21</b>   | 146.11 | 274.19          | 137.60 |               |        | 1     |

Query 2266 Hit 1

MS/MS Fragmentation of **SLVEIIEHGLVDEQQK**

Found in **sp|O75533|SF3B1\_HUMAN**, Splicing factor 3B subunit 1 OS=Homo sapiens GN=SF3B1 PE=1 SV=3

Match to Query 2266: 2124.173 from (709.0649, 3+)

Title: 872: Scan 2331 (rt=60.5096, f=3, i=314) [D:\lab212\membrane\Grace\20120305-iTRAQ-1.raw]

Data File:

**Monoisotopic mass of neutral peptide Mr(calc):** 2124.173

**Variable modifications:**

K16 iTRAQ4plex (K)  
 Ions Score: 76.48 Expect: 0.000

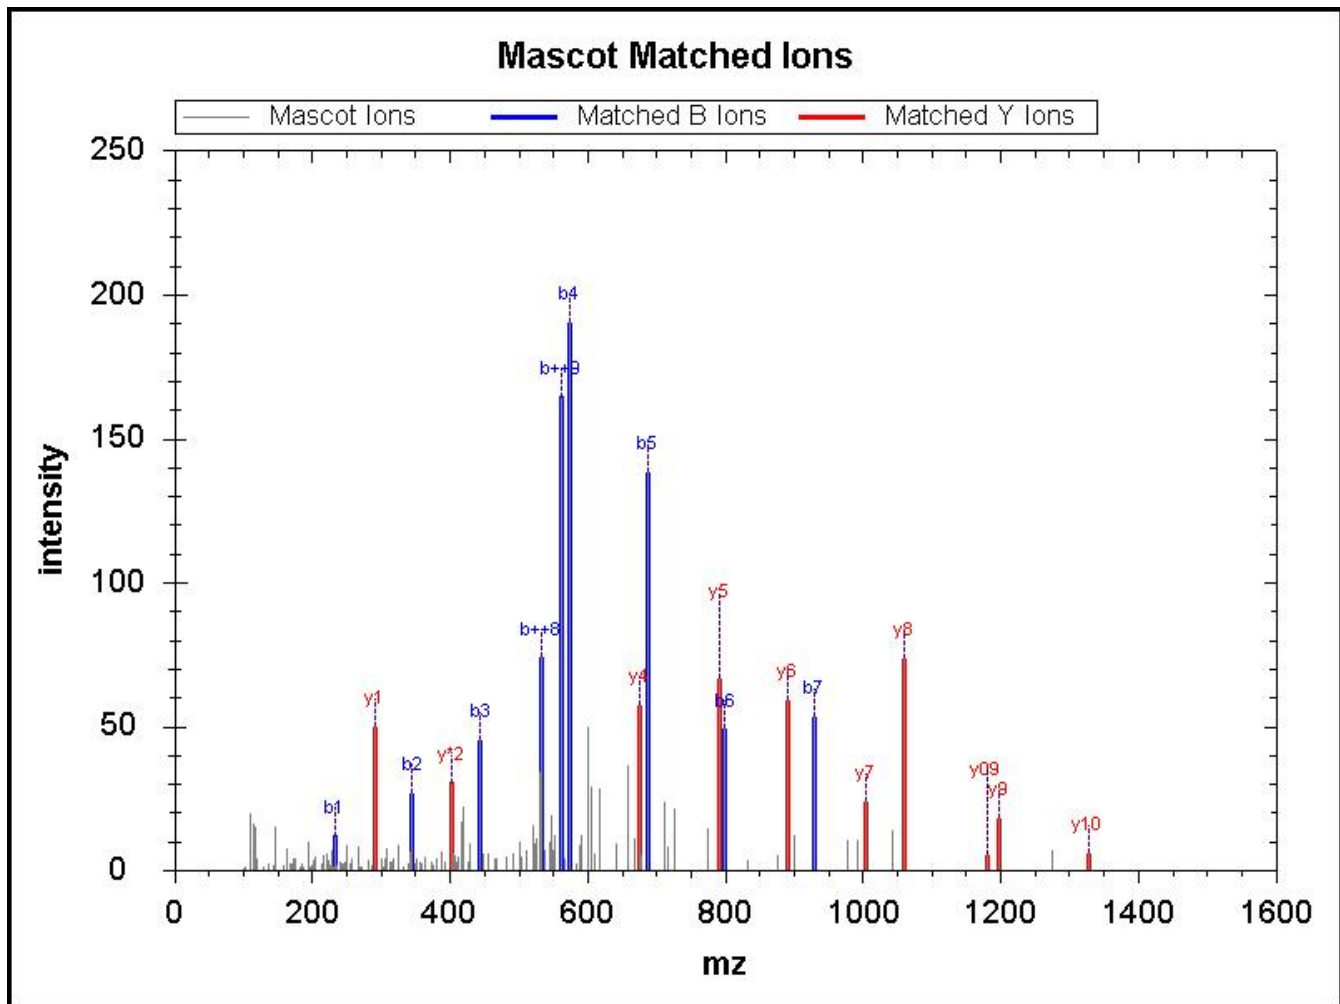

| No | b        | b++    | b*       | b*++   | b0       | b0++   | Seq | y        | y++    | y*       | y*++   | y0       | y0++   | RevNo |
|----|----------|--------|----------|--------|----------|--------|-----|----------|--------|----------|--------|----------|--------|-------|
| 1  | 232.14   | 116.57 |          |        | 214.13   | 107.57 | S   |          |        |          |        |          |        | 16    |
| 2  | 345.23   | 173.12 |          |        | 327.21   | 164.11 | L   | 1,894.04 | 947.52 | 1,877.01 | 939.01 | 1,876.03 | 938.52 | 15    |
| 3  | 444.29   | 222.65 |          |        | 426.28   | 213.65 | V   | 1,780.96 | 890.98 | 1,763.93 | 882.47 | 1,762.95 | 881.98 | 14    |
| 4  | 573.34   | 287.17 |          |        | 555.33   | 278.17 | E   | 1,681.89 | 841.45 | 1,664.86 | 832.93 | 1,663.88 | 832.44 | 13    |
| 5  | 686.42   | 343.71 |          |        | 668.41   | 334.71 | I   | 1,552.85 | 776.93 | 1,535.82 | 768.41 | 1,534.83 | 767.92 | 12    |
| 6  | 799.50   | 400.26 |          |        | 781.49   | 391.25 | I   | 1,439.76 | 720.38 | 1,422.73 | 711.87 | 1,421.75 | 711.38 | 11    |
| 7  | 928.55   | 464.78 |          |        | 910.54   | 455.77 | E   | 1,326.68 | 663.84 | 1,309.65 | 655.33 | 1,308.67 | 654.84 | 10    |
| 8  | 1,065.61 | 533.31 |          |        | 1,047.60 | 524.30 | H   | 1,197.63 | 599.32 | 1,180.61 | 590.81 | 1,179.62 | 590.32 | 9     |
| 9  | 1,122.63 | 561.82 |          |        | 1,104.62 | 552.81 | G   | 1,060.58 | 530.79 | 1,043.55 | 522.28 | 1,042.56 | 521.79 | 8     |
| 10 | 1,235.71 | 618.36 |          |        | 1,217.70 | 609.35 | L   | 1,003.55 | 502.28 | 986.53   | 493.77 | 985.54   | 493.28 | 7     |
| 11 | 1,334.78 | 667.89 |          |        | 1,316.77 | 658.89 | V   | 890.47   | 445.74 | 873.44   | 437.23 | 872.46   | 436.73 | 6     |
| 12 | 1,449.81 | 725.41 |          |        | 1,431.80 | 716.40 | D   | 791.40   | 396.20 | 774.38   | 387.69 | 773.39   | 387.20 | 5     |
| 13 | 1,578.85 | 789.93 |          |        | 1,560.84 | 780.92 | E   | 676.37   | 338.69 | 659.35   | 330.18 | 658.36   | 329.69 | 4     |
| 14 | 1,706.91 | 853.96 | 1,689.88 | 845.44 | 1,688.90 | 844.95 | Q   | 547.33   | 274.17 | 530.31   | 265.66 |          |        | 3     |
| 15 | 1,834.97 | 917.99 | 1,817.94 | 909.47 | 1,816.96 | 908.98 | Q   | 419.27   | 210.14 | 402.25   | 201.63 |          |        | 2     |
| 16 |          |        |          |        |          |        | K   | 291.21   | 146.11 | 274.19   | 137.60 |          |        | 1     |

Query 2187 Hit 1

MS/MS Fragmentation of **IMEIVDAITTAQSHQR**

Found in **sp|P08237|K6PF\_HUMAN**, 6-phosphofructokinase

Match to Query 2187: 2057.081 from (686.7009, 3+)

Title: 941: Sum of 2 scans in range 2352 (rt=61.4357, f=4, i=650) to 2353 (rt=61.4611, f=4, i=651)

Data File:

**Monoisotopic mass of neutral peptide Mr(calc): 2057.081**

**Variable modifications:**

**Ions Score: 75.88 Expect: 0.000**

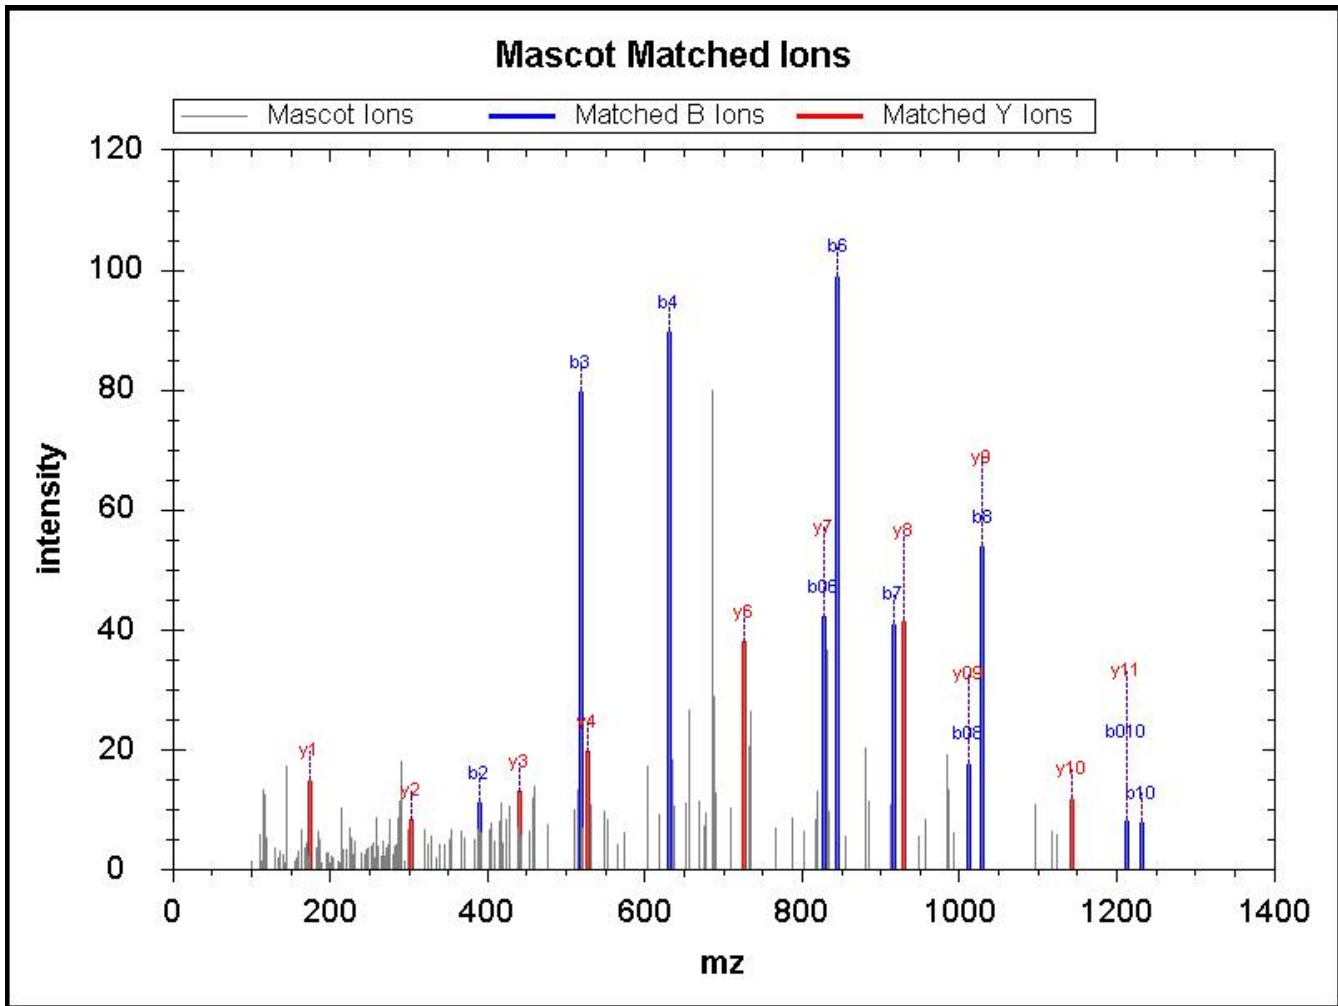

| No | b               | b++    | b*       | b*++   | b0              | b0++   | Seq | y               | y++    | y*       | y*++   | y0              | y0++   | RevNo |
|----|-----------------|--------|----------|--------|-----------------|--------|-----|-----------------|--------|----------|--------|-----------------|--------|-------|
| 1  | 258.19          | 129.60 |          |        |                 |        | I   |                 |        |          |        |                 |        | 17    |
| 2  | <b>389.23</b>   | 195.12 |          |        |                 |        | M   | 1,800.89        | 900.95 | 1,783.86 | 892.44 | 1,782.88        | 891.94 | 16    |
| 3  | <b>518.28</b>   | 259.64 |          |        | 500.27          | 250.64 | E   | 1,669.85        | 835.43 | 1,652.82 | 826.92 | 1,651.84        | 826.42 | 15    |
| 4  | <b>631.36</b>   | 316.18 |          |        | 613.35          | 307.18 | I   | 1,540.81        | 770.91 | 1,523.78 | 762.39 | 1,522.80        | 761.90 | 14    |
| 5  | 730.43          | 365.72 |          |        | 712.42          | 356.71 | V   | 1,427.72        | 714.37 | 1,410.70 | 705.85 | 1,409.71        | 705.36 | 13    |
| 6  | <b>845.46</b>   | 423.23 |          |        | <b>827.45</b>   | 414.23 | D   | 1,328.66        | 664.83 | 1,311.63 | 656.32 | 1,310.64        | 655.83 | 12    |
| 7  | <b>916.49</b>   | 458.75 |          |        | 898.48          | 449.74 | A   | <b>1,213.63</b> | 607.32 | 1,196.60 | 598.80 | 1,195.62        | 598.31 | 11    |
| 8  | <b>1,029.58</b> | 515.29 |          |        | <b>1,011.57</b> | 506.29 | I   | <b>1,142.59</b> | 571.80 | 1,125.56 | 563.29 | 1,124.58        | 562.79 | 10    |
| 9  | 1,130.62        | 565.82 |          |        | 1,112.61        | 556.81 | T   | <b>1,029.51</b> | 515.26 | 1,012.48 | 506.74 | <b>1,011.50</b> | 506.25 | 9     |
| 10 | <b>1,231.67</b> | 616.34 |          |        | <b>1,213.66</b> | 607.33 | T   | <b>928.46</b>   | 464.73 | 911.43   | 456.22 | 910.45          | 455.73 | 8     |
| 11 | 1,332.72        | 666.86 |          |        | 1,314.71        | 657.86 | T   | <b>827.41</b>   | 414.21 | 810.39   | 405.70 | 809.40          | 405.20 | 7     |
| 12 | 1,403.76        | 702.38 |          |        | 1,385.75        | 693.38 | A   | <b>726.36</b>   | 363.69 | 709.34   | 355.17 | 708.35          | 354.68 | 6     |
| 13 | 1,531.82        | 766.41 | 1,514.79 | 757.90 | 1,513.81        | 757.41 | Q   | 655.33          | 328.17 | 638.30   | 319.65 | 637.32          | 319.16 | 5     |
| 14 | 1,618.85        | 809.93 | 1,601.82 | 801.41 | 1,600.84        | 800.92 | S   | <b>527.27</b>   | 264.14 | 510.24   | 255.62 | 509.26          | 255.13 | 4     |
| 15 | 1,755.91        | 878.46 | 1,738.88 | 869.94 | 1,737.90        | 869.45 | H   | <b>440.24</b>   | 220.62 | 423.21   | 212.11 |                 |        | 3     |
| 16 | 1,883.97        | 942.49 | 1,866.94 | 933.97 | 1,865.95        | 933.48 | Q   | <b>303.18</b>   | 152.09 | 286.15   | 143.58 |                 |        | 2     |
| 17 |                 |        |          |        |                 |        | R   | <b>175.12</b>   | 88.06  | 158.09   | 79.55  |                 |        | 1     |

MS/MS Fragmentation of **SIVSELAGLLSAMEYVQK**

Found in **sp|P40763|STAT3\_HUMAN**, Signal transducer and activator of transcription 3 OS=Homo sapiens GN=STAT3 PE=1 SV=2

Match to Query 2375: 2225.236from(742.7526,3+)

Title: 1390: Sum of 2 scans in range 3400 (rt=85.0496, f=4, i=988) to 3401 (rt=85.075, f=4, i=989)

[D:\lab212\membrane\Grace\20120305-iTRAQ-2.raw]

Data File:

**Monoisotopic mass of neutral peptide Mr(calc): 2225.236**

**Variable modifications:**

**K18** iTRAQ4plex (K)

**Ions Score: 75.38 Expect: 0.000**

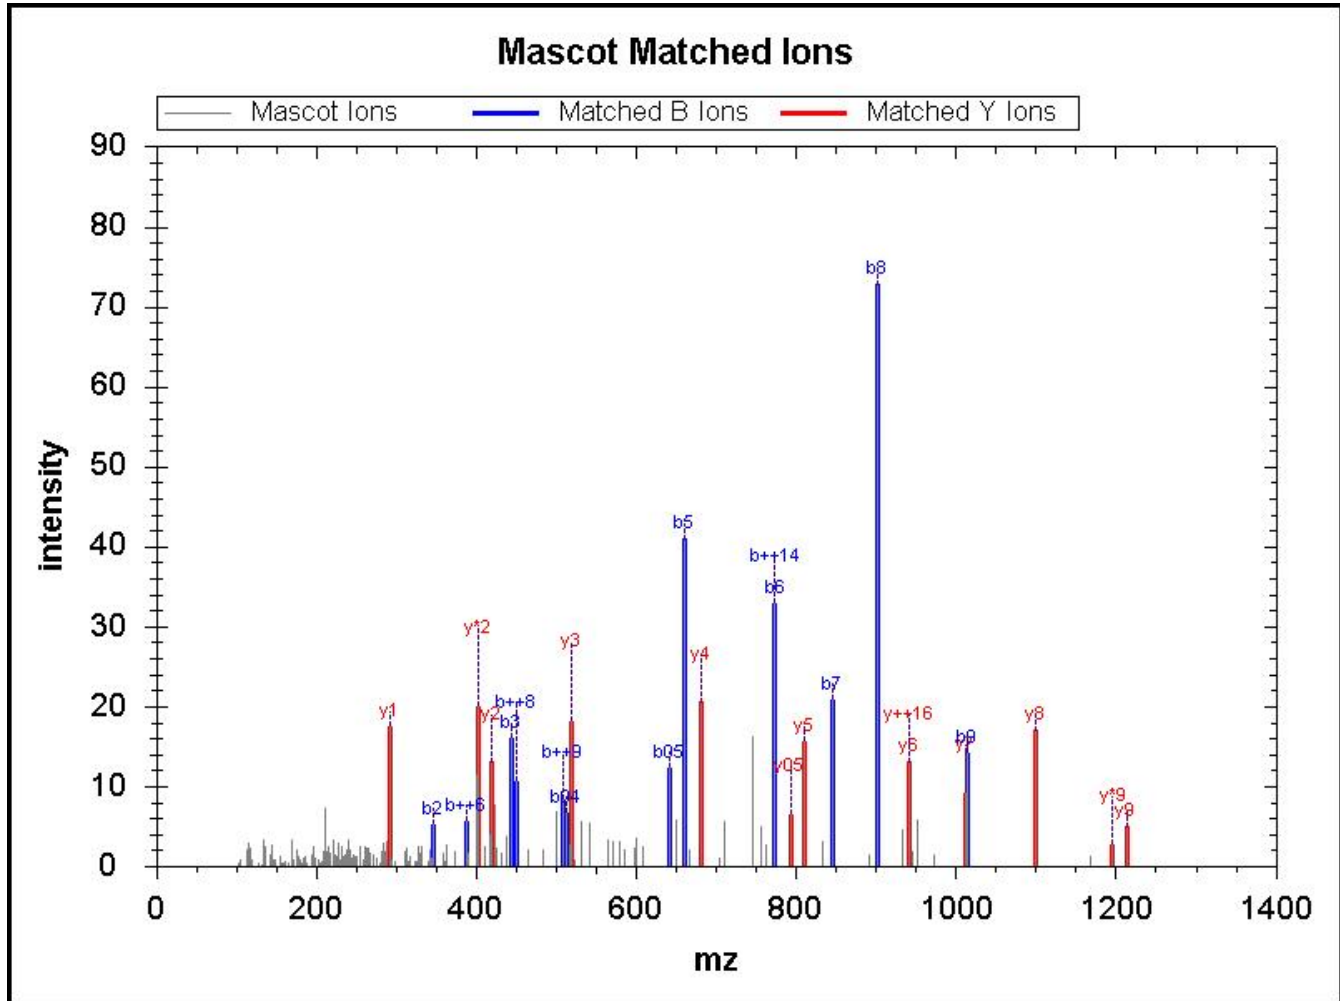

| No | b        | b++    | b* | b*++ | b0       | b0++   | Seq | y        | y++    | y*       | y*++   | y0       | y0++   | RevNo |
|----|----------|--------|----|------|----------|--------|-----|----------|--------|----------|--------|----------|--------|-------|
| 1  | 232.14   | 116.57 |    |      | 214.13   | 107.57 | S   |          |        |          |        |          |        | 18    |
| 2  | 345.23   | 173.12 |    |      | 327.21   | 164.11 | I   | 1,995.10 | 998.05 | 1,978.07 | 989.54 | 1,977.08 | 989.05 | 17    |
| 3  | 444.29   | 222.65 |    |      | 426.28   | 213.65 | V   | 1,882.01 | 941.51 | 1,864.98 | 933.00 | 1,864.00 | 932.50 | 16    |
| 4  | 531.33   | 266.17 |    |      | 513.32   | 257.16 | S   | 1,782.94 | 891.98 | 1,765.92 | 883.46 | 1,764.93 | 882.97 | 15    |
| 5  | 660.37   | 330.69 |    |      | 642.36   | 321.68 | E   | 1,695.91 | 848.46 | 1,678.88 | 839.95 | 1,677.90 | 839.45 | 14    |
| 6  | 773.45   | 387.23 |    |      | 755.44   | 378.22 | L   | 1,566.87 | 783.94 | 1,549.84 | 775.42 | 1,548.86 | 774.93 | 13    |
| 7  | 844.49   | 422.75 |    |      | 826.48   | 413.74 | A   | 1,453.78 | 727.40 | 1,436.76 | 718.88 | 1,435.77 | 718.39 | 12    |
| 8  | 901.51   | 451.26 |    |      | 883.50   | 442.25 | G   | 1,382.75 | 691.88 | 1,365.72 | 683.36 | 1,364.74 | 682.87 | 11    |
| 9  | 1,014.60 | 507.80 |    |      | 996.58   | 498.80 | L   | 1,325.73 | 663.37 | 1,308.70 | 654.85 | 1,307.71 | 654.36 | 10    |
| 10 | 1,127.68 | 564.34 |    |      | 1,109.67 | 555.34 | L   | 1,212.64 | 606.82 | 1,195.61 | 598.31 | 1,194.63 | 597.82 | 9     |
| 11 | 1,214.71 | 607.86 |    |      | 1,196.70 | 598.85 | S   | 1,099.56 | 550.28 | 1,082.53 | 541.77 | 1,081.55 | 541.28 | 8     |
| 12 | 1,285.75 | 643.38 |    |      | 1,267.74 | 634.37 | A   | 1,012.53 | 506.77 | 995.50   | 498.25 | 994.51   | 497.76 | 7     |
| 13 | 1,416.79 | 708.90 |    |      | 1,398.78 | 699.89 | M   | 941.49   | 471.25 | 924.46   | 462.73 | 923.48   | 462.24 | 6     |
| 14 | 1,545.83 | 773.42 |    |      | 1,527.82 | 764.41 | E   | 810.45   | 405.73 | 793.42   | 397.21 | 792.44   | 396.72 | 5     |
| 15 | 1,708.89 | 854.95 |    |      | 1,690.88 | 845.95 | Y   | 681.41   | 341.21 | 664.38   | 332.69 |          |        | 4     |

|    |          |        |          |        |          |        |   |        |        |        |        |  |  |   |
|----|----------|--------|----------|--------|----------|--------|---|--------|--------|--------|--------|--|--|---|
| 16 | 1,807.96 | 904.49 |          |        | 1,789.95 | 895.48 | V | 518.34 | 259.67 | 501.32 | 251.16 |  |  | 3 |
| 17 | 1,936.02 | 968.51 | 1,919.00 | 960.00 | 1,918.01 | 959.51 | Q | 419.27 | 210.14 | 402.25 | 201.63 |  |  | 2 |
| 18 |          |        |          |        |          |        | K | 291.21 | 146.11 | 274.19 | 137.60 |  |  | 1 |

Query 2585 Hit 1

MS/MS Fragmentation of **KLELSDNIISGGLEVLAEK**

Found in **sp|Q9BTT0|AN32E\_HUMAN**, Acidic leucine-rich nuclear phosphoprotein 32 family member E OS=Homo sapiens

GN=ANP32E PE=1 SV=1

Match to Query 2585: 2459.429from(820.8171,3+)

Title: 879: Scan 2349 (rt=60.9169, f=3, i=317) [D:\lab212\membrane\Grace\20120305-iTRAQ-1.raw]

Data File:

**Monoisotopic mass of neutral peptide Mr(calc): 2459.429**

**Variable modifications:**

**K1** iTRAQ4plex (K)

**K19** iTRAQ4plex (K)

**Ions Score: 74.41 Expect: 0.000**

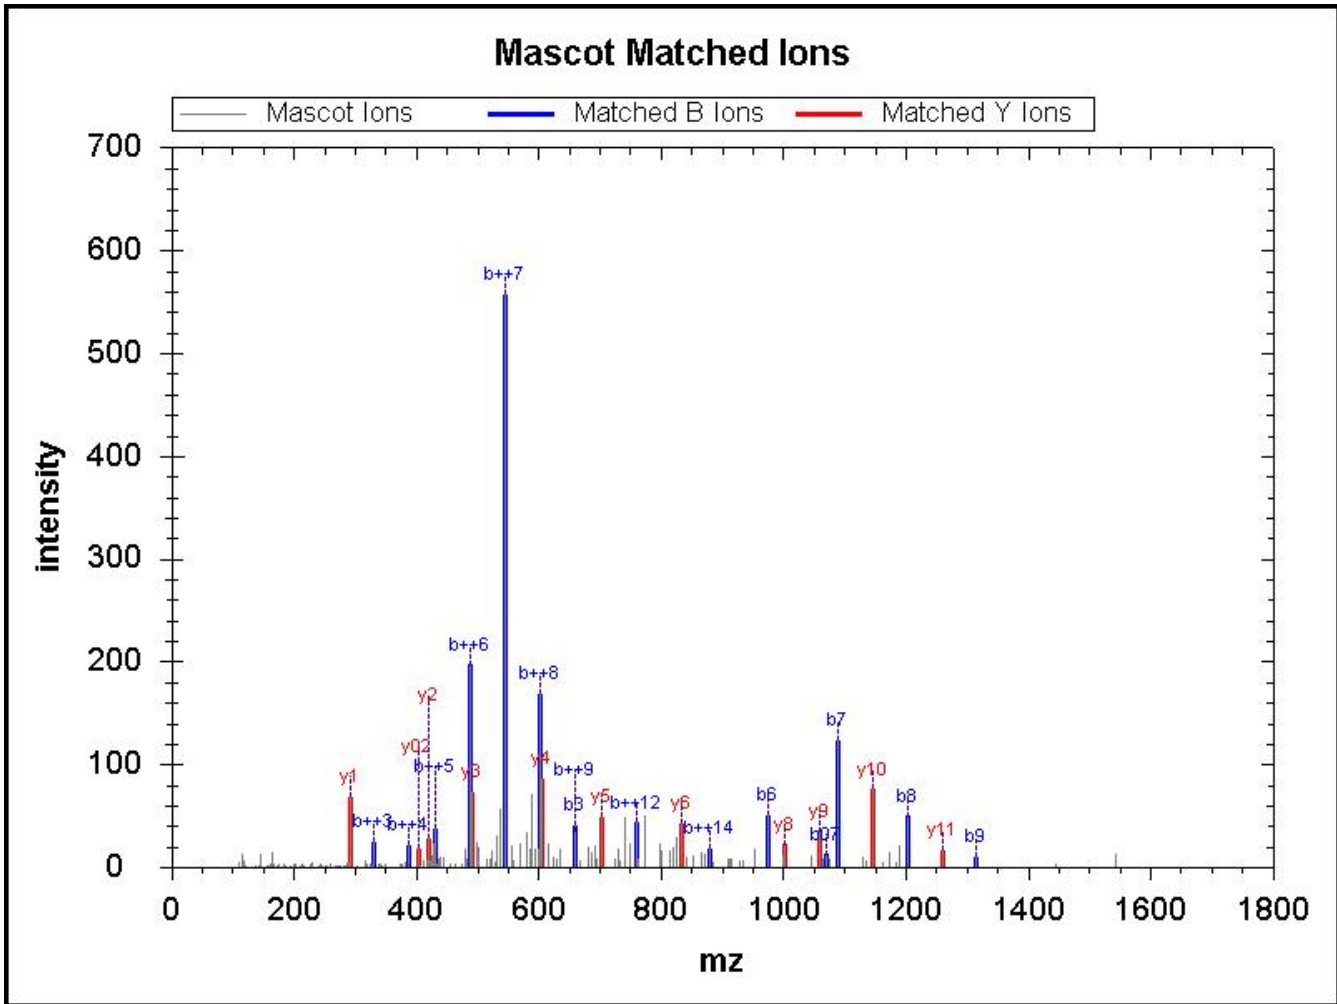

| No | b        | b++    | b*       | b*++   | b0       | b0++   | Seq | y        | y++      | y*       | y*++     | y0       | y0++     | RevNo |
|----|----------|--------|----------|--------|----------|--------|-----|----------|----------|----------|----------|----------|----------|-------|
| 1  | 417.31   | 209.16 | 400.28   | 200.64 |          |        | K   |          |          |          |          |          |          | 19    |
| 2  | 530.39   | 265.70 | 513.36   | 257.19 |          |        | L   | 2,044.13 | 1,022.57 | 2,027.10 | 1,014.06 | 2,026.12 | 1,013.56 | 18    |
| 3  | 659.43   | 330.22 | 642.41   | 321.71 | 641.42   | 321.21 | E   | 1,931.05 | 966.03   | 1,914.02 | 957.51   | 1,913.03 | 957.02   | 17    |
| 4  | 772.52   | 386.76 | 755.49   | 378.25 | 754.51   | 377.76 | L   | 1,802.00 | 901.51   | 1,784.98 | 892.99   | 1,783.99 | 892.50   | 16    |
| 5  | 859.55   | 430.28 | 842.52   | 421.76 | 841.54   | 421.27 | S   | 1,688.92 | 844.96   | 1,671.89 | 836.45   | 1,670.91 | 835.96   | 15    |
| 6  | 974.58   | 487.79 | 957.55   | 479.28 | 956.57   | 478.79 | D   | 1,601.89 | 801.45   | 1,584.86 | 792.93   | 1,583.88 | 792.44   | 14    |
| 7  | 1,088.62 | 544.81 | 1,071.59 | 536.30 | 1,070.61 | 535.81 | N   | 1,486.86 | 743.93   | 1,469.83 | 735.42   | 1,468.85 | 734.93   | 13    |
| 8  | 1,201.70 | 601.36 | 1,184.68 | 592.84 | 1,183.69 | 592.35 | I   | 1,372.82 | 686.91   | 1,355.79 | 678.40   | 1,354.81 | 677.91   | 12    |
| 9  | 1,314.79 | 657.90 | 1,297.76 | 649.38 | 1,296.78 | 648.89 | I   | 1,259.73 | 630.37   | 1,242.71 | 621.86   | 1,241.72 | 621.36   | 11    |



|    |          |          |          |          |          |          |   |          |        |          |        |          |        |    |
|----|----------|----------|----------|----------|----------|----------|---|----------|--------|----------|--------|----------|--------|----|
| 10 | 1,401.82 | 701.41   | 1,384.79 | 692.90   | 1,383.81 | 692.41   | S | 1,146.65 | 573.83 | 1,129.62 | 565.31 | 1,128.64 | 564.82 | 10 |
| 11 | 1,458.84 | 729.92   | 1,441.81 | 721.41   | 1,440.83 | 720.92   | G | 1,059.62 | 530.31 | 1,042.59 | 521.80 | 1,041.61 | 521.31 | 9  |
| 12 | 1,515.86 | 758.43   | 1,498.84 | 749.92   | 1,497.85 | 749.43   | G | 1,002.60 | 501.80 | 985.57   | 493.29 | 984.58   | 492.80 | 8  |
| 13 | 1,628.95 | 814.98   | 1,611.92 | 806.46   | 1,610.94 | 805.97   | L | 945.57   | 473.29 | 928.55   | 464.78 | 927.56   | 464.29 | 7  |
| 14 | 1,757.99 | 879.50   | 1,740.96 | 870.98   | 1,739.98 | 870.49   | E | 832.49   | 416.75 | 815.46   | 408.24 | 814.48   | 407.74 | 6  |
| 15 | 1,857.06 | 929.03   | 1,840.03 | 920.52   | 1,839.05 | 920.03   | V | 703.45   | 352.23 | 686.42   | 343.71 | 685.44   | 343.22 | 5  |
| 16 | 1,970.14 | 985.57   | 1,953.11 | 977.06   | 1,952.13 | 976.57   | L | 604.38   | 302.69 | 587.35   | 294.18 | 586.37   | 293.69 | 4  |
| 17 | 2,041.18 | 1,021.09 | 2,024.15 | 1,012.58 | 2,023.17 | 1,012.09 | A | 491.29   | 246.15 | 474.27   | 237.64 | 473.28   | 237.15 | 3  |
| 18 | 2,170.22 | 1,085.61 | 2,153.19 | 1,077.10 | 2,152.21 | 1,076.61 | E | 420.26   | 210.63 | 403.23   | 202.12 | 402.25   | 201.63 | 2  |
| 19 |          |          |          |          |          |          | K | 291.21   | 146.11 | 274.19   | 137.60 |          |        | 1  |

Query 2419 Hit 1

MS/MS Fragmentation of **QQDAQEFFLHLINMVER**

Found in **sp|P45974|UBP5\_HUMAN**, Ubiquitin carboxyl-terminal hydrolase 5 OS=Homo sapiens GN=USP5 PE=1 SV=2

Match to Query 2419: 2261.157from(754.7263,3+)

Title: 1193: Sum of 2 scans in range 2898 (rt=73.7373, f=4, i=826) to 2899 (rt=73.7627, f=4, i=827)

[D:\lab212\membrane\Grace\20120305-iTRAQ-2.raw]

Data File:

**Monoisotopic mass of neutral peptide Mr(calc): 2261.157**

**Variable modifications:**

**Ions Score: 74.32 Expect: 0.000**

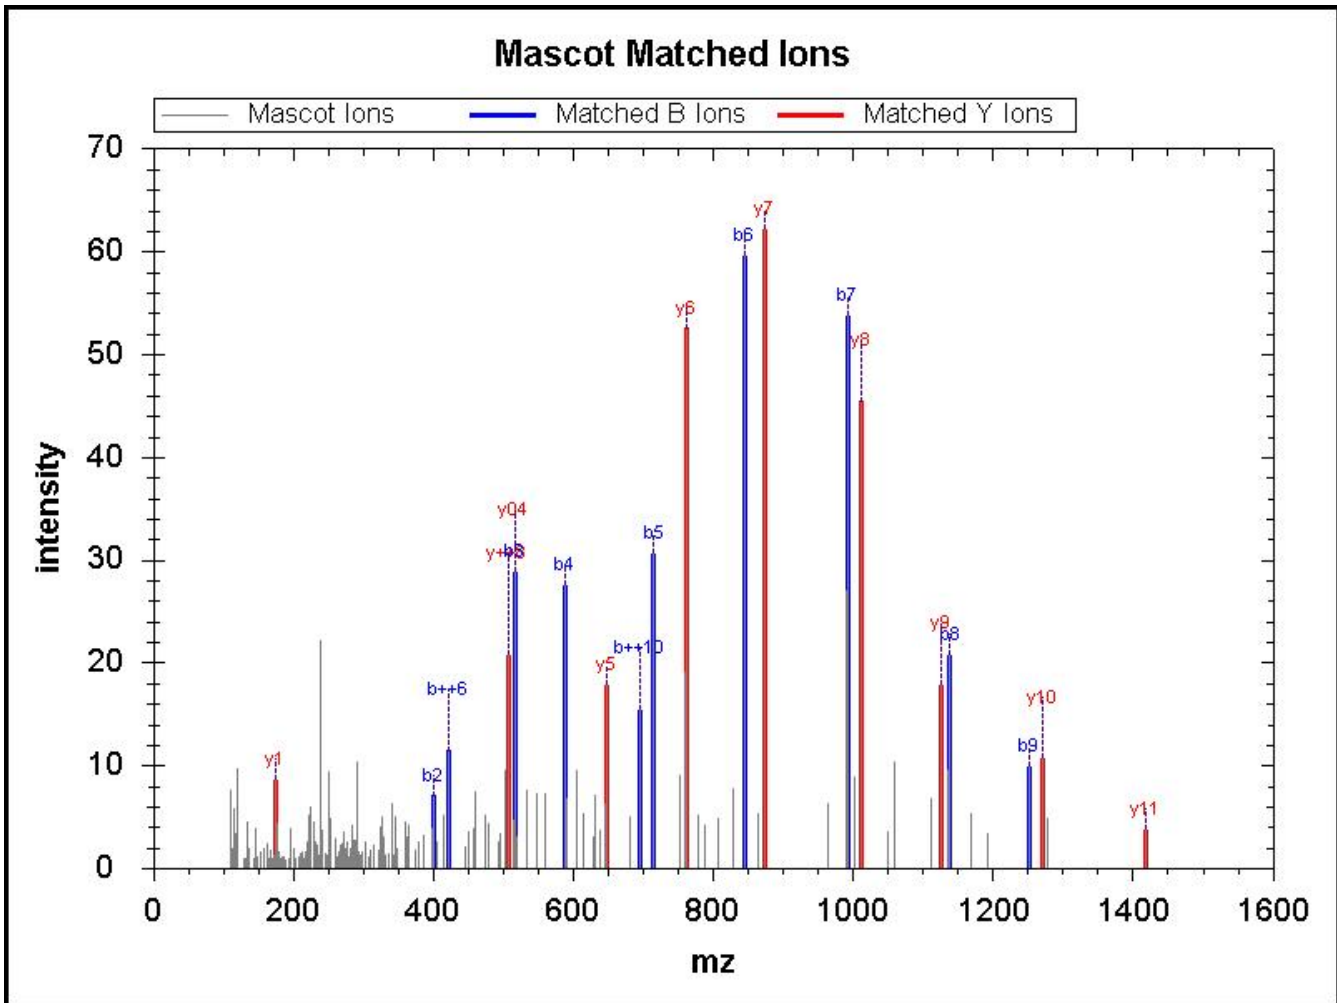

| No | b      | b++    | b*     | b*++   | b0     | b0++   | Seq | y        | y++    | y*       | y*++   | y0       | y0++   | RevNo |
|----|--------|--------|--------|--------|--------|--------|-----|----------|--------|----------|--------|----------|--------|-------|
| 1  | 273.17 | 137.09 | 256.14 | 128.57 |        |        | Q   |          |        |          |        |          |        | 17    |
| 2  | 401.23 | 201.12 | 384.20 | 192.60 |        |        | Q   | 1,989.99 | 995.50 | 1,972.96 | 986.98 | 1,971.97 | 986.49 | 16    |
| 3  | 516.25 | 258.63 | 499.23 | 250.12 | 498.24 | 249.63 | D   | 1,861.93 | 931.47 | 1,844.90 | 922.95 | 1,843.92 | 922.46 | 15    |

|    |          |          |          |          |          |          |   |          |        |          |        |          |        |    |
|----|----------|----------|----------|----------|----------|----------|---|----------|--------|----------|--------|----------|--------|----|
| 4  | 587.29   | 294.15   | 570.26   | 285.64   | 569.28   | 285.14   | A | 1,746.90 | 873.95 | 1,729.87 | 865.44 | 1,728.89 | 864.95 | 14 |
| 5  | 715.35   | 358.18   | 698.32   | 349.66   | 697.34   | 349.17   | Q | 1,675.86 | 838.43 | 1,658.84 | 829.92 | 1,657.85 | 829.43 | 13 |
| 6  | 844.39   | 422.70   | 827.37   | 414.19   | 826.38   | 413.69   | E | 1,547.80 | 774.41 | 1,530.78 | 765.89 | 1,529.79 | 765.40 | 12 |
| 7  | 991.46   | 496.23   | 974.43   | 487.72   | 973.45   | 487.23   | F | 1,418.76 | 709.88 | 1,401.73 | 701.37 | 1,400.75 | 700.88 | 11 |
| 8  | 1,138.53 | 569.77   | 1,121.50 | 561.25   | 1,120.52 | 560.76   | F | 1,271.69 | 636.35 | 1,254.67 | 627.84 | 1,253.68 | 627.34 | 10 |
| 9  | 1,251.61 | 626.31   | 1,234.59 | 617.80   | 1,233.60 | 617.30   | L | 1,124.62 | 562.82 | 1,107.60 | 554.30 | 1,106.61 | 553.81 | 9  |
| 10 | 1,388.67 | 694.84   | 1,371.65 | 686.33   | 1,370.66 | 685.83   | H | 1,011.54 | 506.27 | 994.51   | 497.76 | 993.53   | 497.27 | 8  |
| 11 | 1,501.76 | 751.38   | 1,484.73 | 742.87   | 1,483.75 | 742.38   | L | 874.48   | 437.74 | 857.45   | 429.23 | 856.47   | 428.74 | 7  |
| 12 | 1,614.84 | 807.92   | 1,597.81 | 799.41   | 1,596.83 | 798.92   | I | 761.40   | 381.20 | 744.37   | 372.69 | 743.39   | 372.20 | 6  |
| 13 | 1,728.88 | 864.95   | 1,711.86 | 856.43   | 1,710.87 | 855.94   | N | 648.31   | 324.66 | 631.29   | 316.15 | 630.30   | 315.65 | 5  |
| 14 | 1,859.92 | 930.47   | 1,842.90 | 921.95   | 1,841.91 | 921.46   | M | 534.27   | 267.64 | 517.24   | 259.13 | 516.26   | 258.63 | 4  |
| 15 | 1,958.99 | 980.00   | 1,941.97 | 971.49   | 1,940.98 | 970.99   | V | 403.23   | 202.12 | 386.20   | 193.61 | 385.22   | 193.11 | 3  |
| 16 | 2,088.03 | 1,044.52 | 2,071.01 | 1,036.01 | 2,070.02 | 1,035.52 | E | 304.16   | 152.58 | 287.13   | 144.07 | 286.15   | 143.58 | 2  |
| 17 |          |          |          |          |          |          | R | 175.12   | 88.06  | 158.09   | 79.55  |          |        | 1  |

Query 2000 Hit 1

MS/MS Fragmentation of **GLGTDEDTHDITHR**

Found in **sp|P08133|ANXA6\_HUMAN**, Annexin A6 OS=Homo sapiens GN=ANXA6 PE=1 SV=3

Match to Query 2000: 1912.012from(638.3445,3+)

Title: 922: Sum of 2 scans in range 2309 (rt=60.4656, f=4, i=636) to 2310 (rt=60.491, f=4, i=637)

[D:\lab212\membrane\Grace\20120305-iTRAQ-2.raw]

Data File:

**Monoisotopic mass of neutral peptide Mr(calc): 1912.012**

**Variable modifications:**

**Ions Score: 71.53 Expect: 0.000**

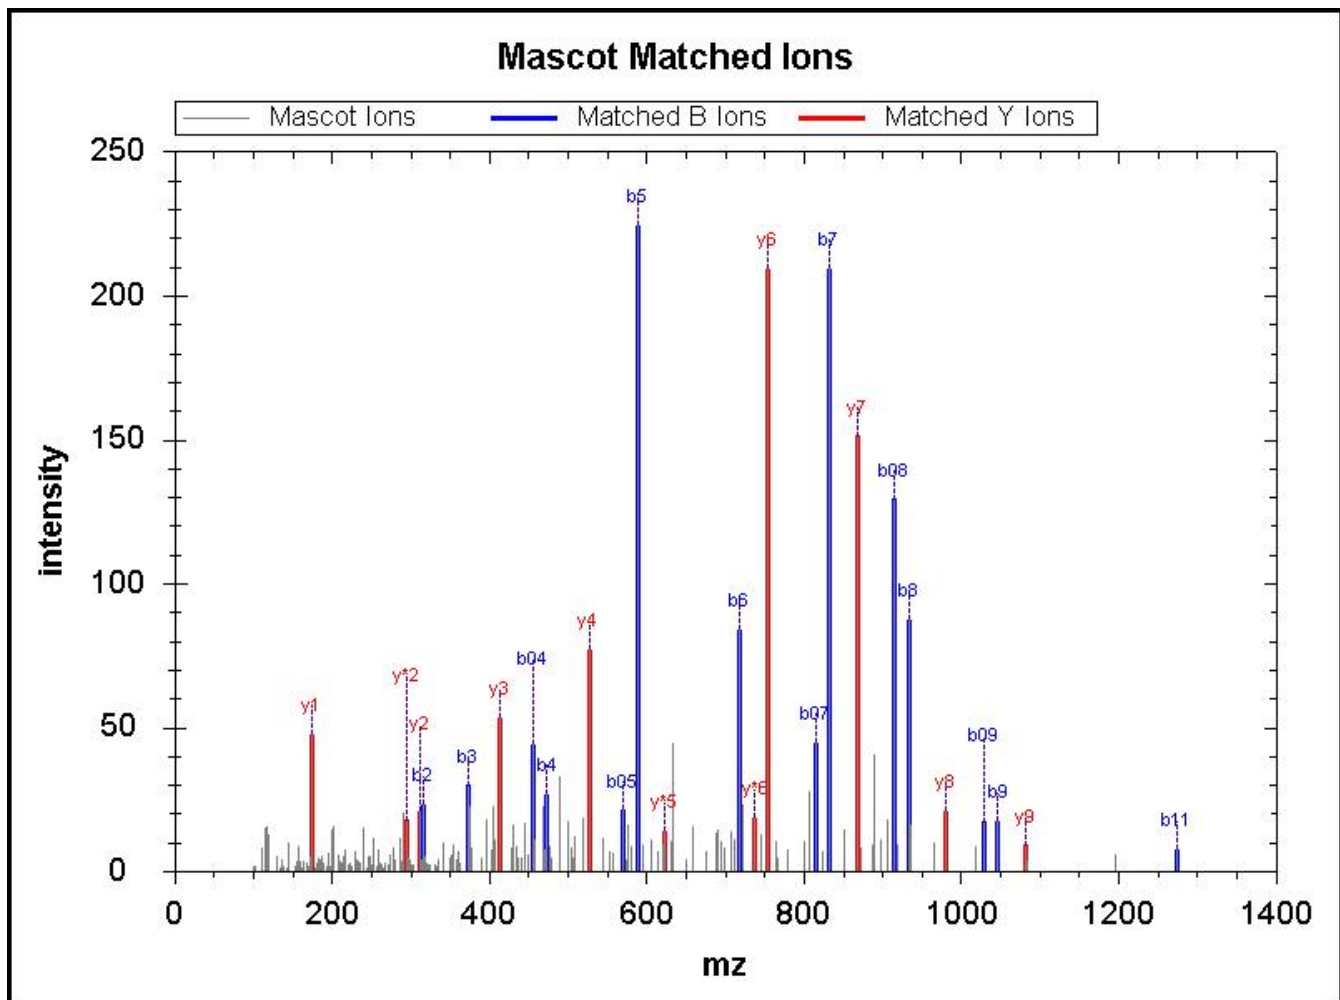

| No | b        | b++    | b0       | b0++   | Seq | y        | y++    | y*       | y*++   | y0       | y0++   | RevNo |
|----|----------|--------|----------|--------|-----|----------|--------|----------|--------|----------|--------|-------|
| 1  | 202.13   | 101.57 |          |        | G   |          |        |          |        |          |        | 16    |
| 2  | 315.21   | 158.11 |          |        | L   | 1,711.89 | 856.45 | 1,694.86 | 847.93 | 1,693.88 | 847.44 | 15    |
| 3  | 372.24   | 186.62 |          |        | G   | 1,598.80 | 799.90 | 1,581.78 | 791.39 | 1,580.79 | 790.90 | 14    |
| 4  | 473.28   | 237.15 | 455.27   | 228.14 | T   | 1,541.78 | 771.39 | 1,524.75 | 762.88 | 1,523.77 | 762.39 | 13    |
| 5  | 588.31   | 294.66 | 570.30   | 285.65 | D   | 1,440.73 | 720.87 | 1,423.71 | 712.36 | 1,422.72 | 711.86 | 12    |
| 6  | 717.35   | 359.18 | 699.34   | 350.18 | E   | 1,325.71 | 663.36 | 1,308.68 | 654.84 | 1,307.70 | 654.35 | 11    |
| 7  | 832.38   | 416.69 | 814.37   | 407.69 | D   | 1,196.66 | 598.84 | 1,179.64 | 590.32 | 1,178.65 | 589.83 | 10    |
| 8  | 933.43   | 467.22 | 915.42   | 458.21 | T   | 1,081.64 | 541.32 | 1,064.61 | 532.81 | 1,063.63 | 532.32 | 9     |
| 9  | 1,046.51 | 523.76 | 1,028.50 | 514.75 | I   | 980.59   | 490.80 | 963.56   | 482.28 | 962.58   | 481.79 | 8     |
| 10 | 1,159.60 | 580.30 | 1,141.59 | 571.30 | I   | 867.50   | 434.26 | 850.48   | 425.74 | 849.49   | 425.25 | 7     |
| 11 | 1,274.62 | 637.82 | 1,256.61 | 628.81 | D   | 754.42   | 377.71 | 737.39   | 369.20 | 736.41   | 368.71 | 6     |
| 12 | 1,387.71 | 694.36 | 1,369.70 | 685.35 | I   | 639.39   | 320.20 | 622.37   | 311.69 | 621.38   | 311.20 | 5     |
| 13 | 1,500.79 | 750.90 | 1,482.78 | 741.89 | I   | 526.31   | 263.66 | 509.28   | 255.15 | 508.30   | 254.65 | 4     |
| 14 | 1,601.84 | 801.42 | 1,583.83 | 792.42 | T   | 413.23   | 207.12 | 396.20   | 198.60 | 395.21   | 198.11 | 3     |
| 15 | 1,738.90 | 869.95 | 1,720.89 | 860.95 | H   | 312.18   | 156.59 | 295.15   | 148.08 |          |        | 2     |
| 16 |          |        |          |        | R   | 175.12   | 88.06  | 158.09   | 79.55  |          |        | 1     |

Query 1785 Hit 1

MS/MS Fragmentation of **ILTFDQLALDSPK**

Found in **sp|Q07020|RL18\_HUMAN**, 60S ribosomal protein L18 OS=Homo sapiens GN=RPL18 PE=1 SV=2

Match to Query 1785: 1747.995from(875.0048,2+)

Title: 775: Sum of 2 scans in range 2121 (rt=55.7811, f=4, i=542) to 2122 (rt=55.8065, f=4, i=543)

[D:\lab212\membrane\Grace\20120305-iTRAQ-1.raw]

Data File:

**Monoisotopic mass of neutral peptide Mr(calc): 1747.995**

**Variable modifications:**

**K13** iTRAQ4plex (K)

**Ions Score: 70.96 Expect: 0.000**

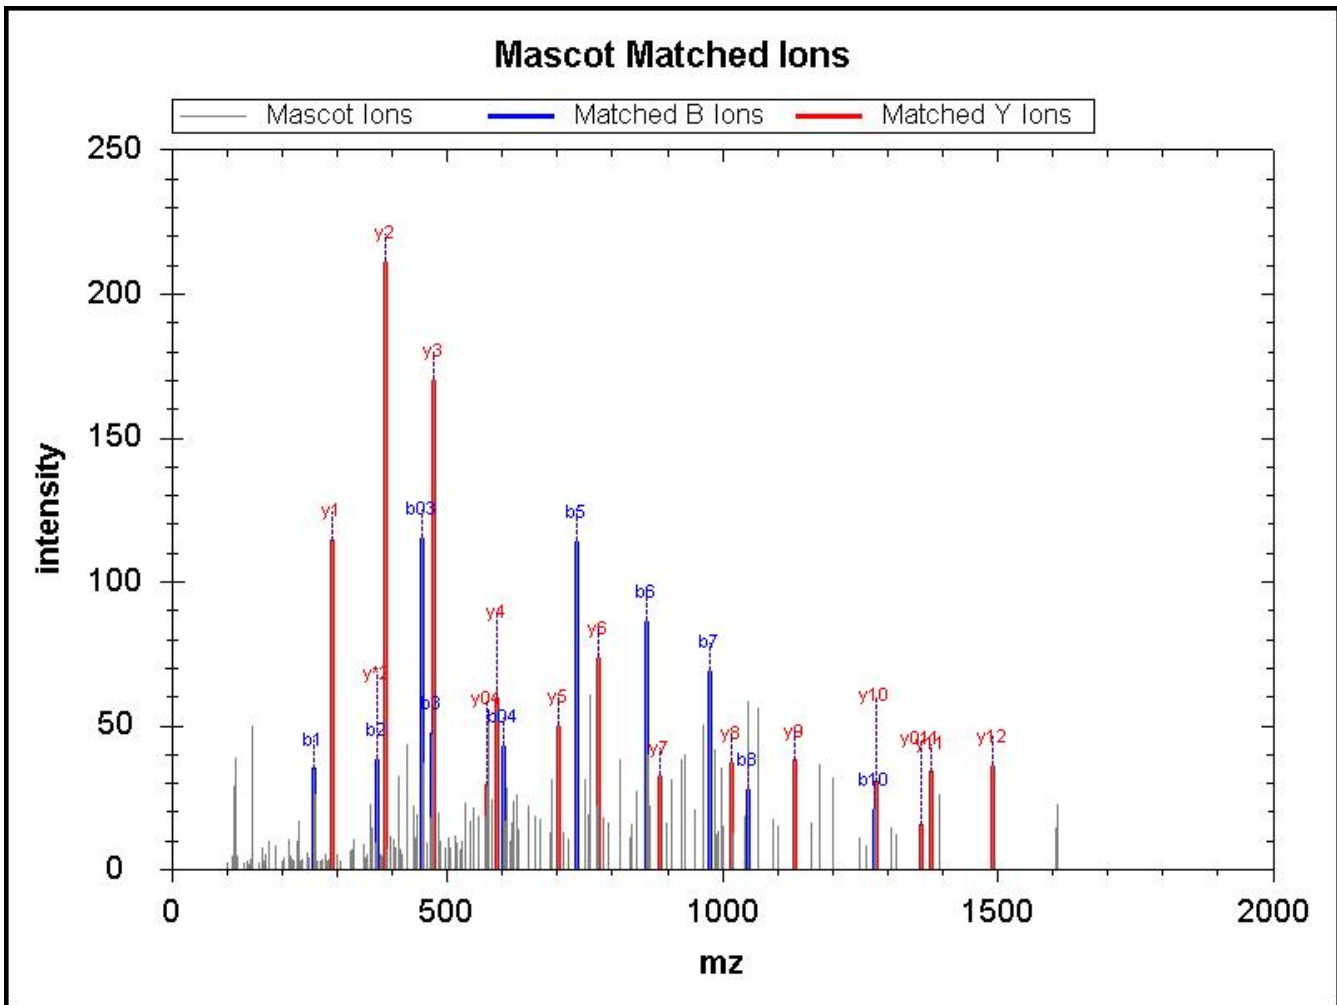

| No | b               | b++    | b*       | b*++   | b0            | b0++   | Seq | y               | y++    | y*            | y*++   | y0              | y0++   | RevNo |
|----|-----------------|--------|----------|--------|---------------|--------|-----|-----------------|--------|---------------|--------|-----------------|--------|-------|
| 1  | <b>258.19</b>   | 129.60 |          |        |               |        | I   |                 |        |               |        |                 |        | 13    |
| 2  | <b>371.28</b>   | 186.14 |          |        |               |        | L   | <b>1,491.82</b> | 746.41 | 1,474.79      | 737.90 | 1,473.81        | 737.41 | 12    |
| 3  | <b>472.33</b>   | 236.67 |          |        | <b>454.31</b> | 227.66 | T   | <b>1,378.73</b> | 689.87 | 1,361.71      | 681.36 | <b>1,360.72</b> | 680.87 | 11    |
| 4  | 619.39          | 310.20 |          |        | <b>601.38</b> | 301.20 | F   | <b>1,277.69</b> | 639.35 | 1,260.66      | 630.83 | 1,259.68        | 630.34 | 10    |
| 5  | <b>734.42</b>   | 367.71 |          |        | 716.41        | 358.71 | D   | <b>1,130.62</b> | 565.81 | 1,113.59      | 557.30 | 1,112.61        | 556.81 | 9     |
| 6  | <b>862.48</b>   | 431.74 | 845.45   | 423.23 | 844.47        | 422.74 | Q   | <b>1,015.59</b> | 508.30 | 998.56        | 499.79 | 997.58          | 499.29 | 8     |
| 7  | <b>975.56</b>   | 488.29 | 958.54   | 479.77 | 957.55        | 479.28 | L   | <b>887.53</b>   | 444.27 | 870.51        | 435.76 | 869.52          | 435.26 | 7     |
| 8  | <b>1,046.60</b> | 523.80 | 1,029.57 | 515.29 | 1,028.59      | 514.80 | A   | <b>774.45</b>   | 387.73 | 757.42        | 379.21 | 756.44          | 378.72 | 6     |
| 9  | 1,159.68        | 580.35 | 1,142.66 | 571.83 | 1,141.67      | 571.34 | L   | <b>703.41</b>   | 352.21 | 686.38        | 343.70 | 685.40          | 343.20 | 5     |
| 10 | <b>1,274.71</b> | 637.86 | 1,257.68 | 629.35 | 1,256.70      | 628.85 | D   | <b>590.33</b>   | 295.67 | 573.30        | 287.15 | <b>572.32</b>   | 286.66 | 4     |
| 11 | 1,361.74        | 681.38 | 1,344.72 | 672.86 | 1,343.73      | 672.37 | S   | <b>475.30</b>   | 238.15 | 458.27        | 229.64 | 457.29          | 229.15 | 3     |
| 12 | 1,458.80        | 729.90 | 1,441.77 | 721.39 | 1,440.79      | 720.90 | P   | <b>388.27</b>   | 194.64 | <b>371.24</b> | 186.12 |                 |        | 2     |
| 13 |                 |        |          |        |               |        | K   | <b>291.21</b>   | 146.11 | 274.19        | 137.60 |                 |        | 1     |

Query 1866 Hit 1

MS/MS Fragmentation of **LLNNAFEELVAFQR**

Found in **sp|P25205|MCM3\_HUMAN**, DNA replication licensing factor MCM3 OS=Homo sapiens GN=MCM3 PE=1 SV=3  
Match to Query 1866: 1806.977 from (904.4958, 2+)

Title: 1008: Sum of 2 scans in range 2629 (rt=67.229, f=4, i=706) to 2630 (rt=67.2544, f=4, i=707)

[D:\lab212\membrane\Grace\20120305-iTRAQ-1.raw]

Data File:

**Monoisotopic mass of neutral peptide Mr(calc): 1806.977**

**Variable modifications:**

**Ions Score: 69.62 Expect: 0.000**

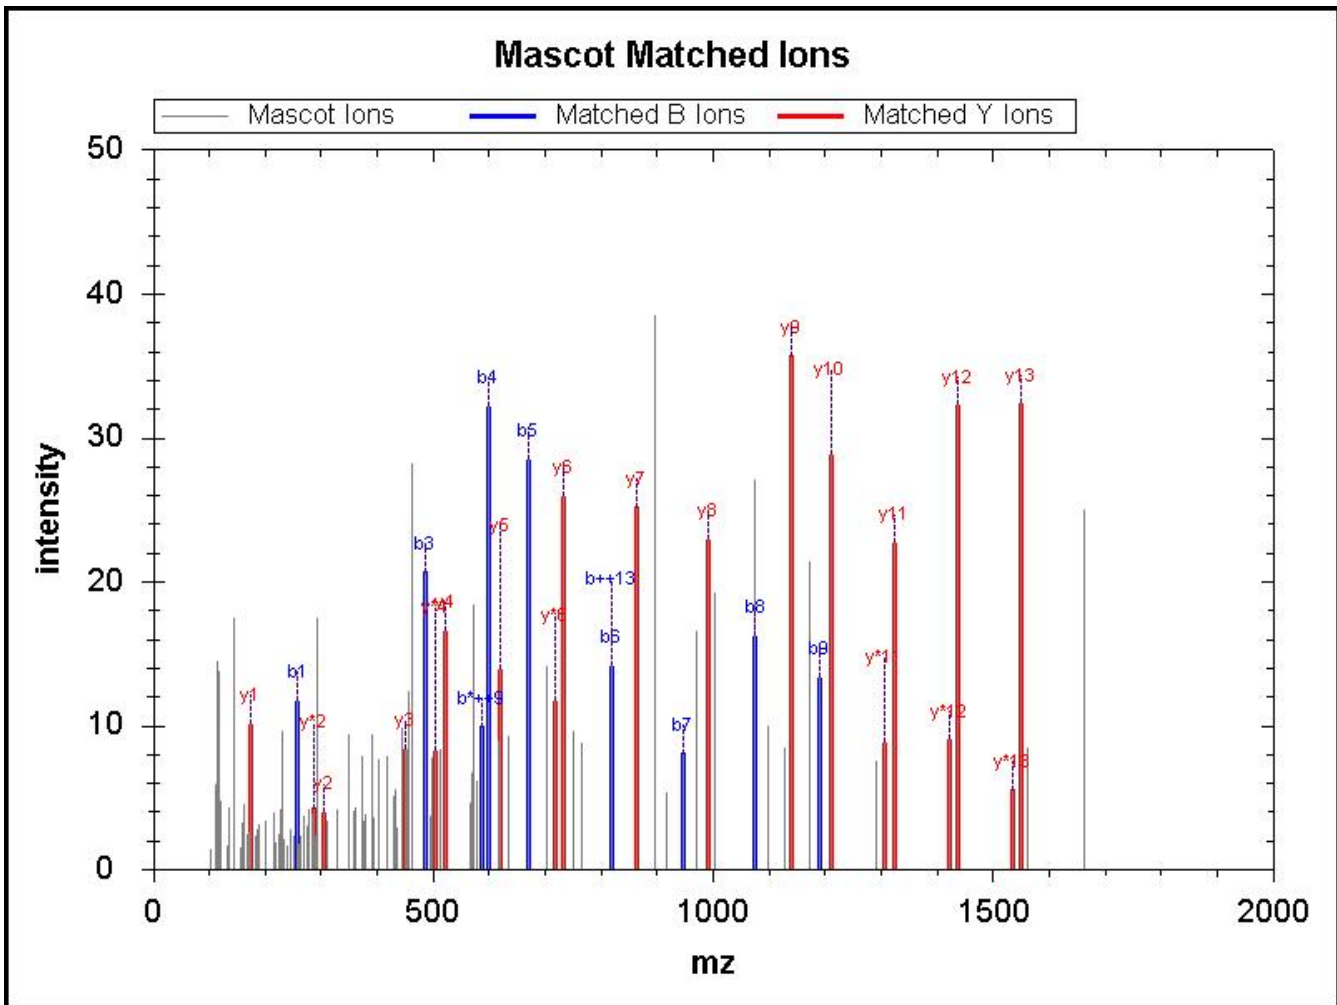

| No | b               | b++           | b*       | b*++          | b0       | b0++   | Seq | y               | y++    | y*              | y*++   | y0       | y0++   | RevNo |
|----|-----------------|---------------|----------|---------------|----------|--------|-----|-----------------|--------|-----------------|--------|----------|--------|-------|
| 1  | <b>258.19</b>   | 129.60        |          |               |          |        | L   |                 |        |                 |        |          |        | 14    |
| 2  | 371.28          | 186.14        |          |               |          |        | L   | <b>1,550.80</b> | 775.90 | <b>1,533.77</b> | 767.39 | 1,532.79 | 766.90 | 13    |
| 3  | <b>485.32</b>   | 243.16        | 468.29   | 234.65        |          |        | N   | <b>1,437.71</b> | 719.36 | <b>1,420.69</b> | 710.85 | 1,419.70 | 710.35 | 12    |
| 4  | <b>599.36</b>   | 300.19        | 582.34   | 291.67        |          |        | N   | <b>1,323.67</b> | 662.34 | <b>1,306.64</b> | 653.83 | 1,305.66 | 653.33 | 11    |
| 5  | <b>670.40</b>   | 335.70        | 653.37   | 327.19        |          |        | A   | <b>1,209.63</b> | 605.32 | 1,192.60        | 596.80 | 1,191.62 | 596.31 | 10    |
| 6  | <b>817.47</b>   | 409.24        | 800.44   | 400.72        |          |        | F   | <b>1,138.59</b> | 569.80 | 1,121.56        | 561.28 | 1,120.58 | 560.79 | 9     |
| 7  | <b>946.51</b>   | 473.76        | 929.48   | 465.25        | 928.50   | 464.75 | E   | <b>991.52</b>   | 496.26 | 974.49          | 487.75 | 973.51   | 487.26 | 8     |
| 8  | <b>1,075.55</b> | 538.28        | 1,058.53 | 529.77        | 1,057.54 | 529.28 | E   | <b>862.48</b>   | 431.74 | 845.45          | 423.23 | 844.47   | 422.74 | 7     |
| 9  | <b>1,188.64</b> | 594.82        | 1,171.61 | <b>586.31</b> | 1,170.63 | 585.82 | L   | <b>733.44</b>   | 367.22 | <b>716.41</b>   | 358.71 |          |        | 6     |
| 10 | 1,287.71        | 644.36        | 1,270.68 | 635.84        | 1,269.70 | 635.35 | V   | <b>620.35</b>   | 310.68 | 603.32          | 302.17 |          |        | 5     |
| 11 | 1,358.74        | 679.88        | 1,341.72 | 671.36        | 1,340.73 | 670.87 | A   | <b>521.28</b>   | 261.15 | <b>504.26</b>   | 252.63 |          |        | 4     |
| 12 | 1,505.81        | 753.41        | 1,488.79 | 744.90        | 1,487.80 | 744.40 | F   | <b>450.25</b>   | 225.63 | 433.22          | 217.11 |          |        | 3     |
| 13 | 1,633.87        | <b>817.44</b> | 1,616.84 | 808.93        | 1,615.86 | 808.43 | Q   | <b>303.18</b>   | 152.09 | <b>286.15</b>   | 143.58 |          |        | 2     |
| 14 |                 |               |          |               |          |        | R   | <b>175.12</b>   | 88.06  | 158.09          | 79.55  |          |        | 1     |

Query 2474 Hit 1

MS/MS Fragmentation of **TWWNQFSVTALQLLQANR**

Found in **sp|Q99536|VAT1\_HUMAN**, Synaptic vesicle membrane protein VAT-1 homolog OS=Homo sapiens GN=VAT1 PE=1 SV=2

Match to Query 2474: 2320.234 from (774.4186, 3+)

Title: 1223: Scan 2971 (rt=75.3806, f=3, i=428) [D:\lab212\membrane\Grace\20120305-iTRAQ-2.raw]

Data File:

**Monoisotopic mass of neutral peptide Mr(calc): 2320.234**

**Variable modifications:**

**Q5**: Deamidated (NQ)

**Ions Score: 66.23 Expect: 0.000**

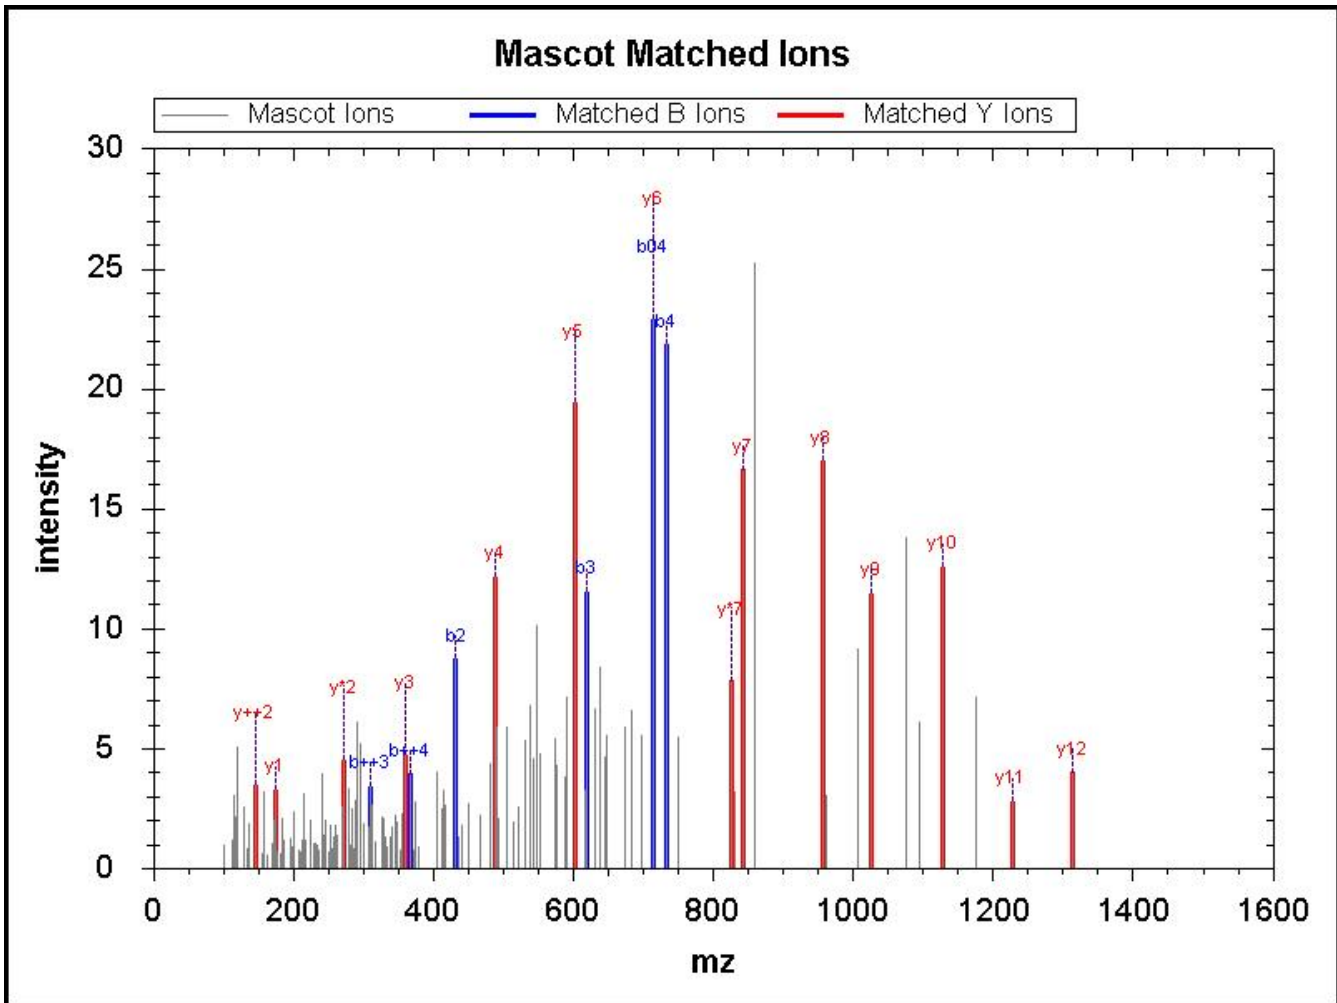

| No | b        | b <sup>++</sup> | b <sup>*</sup> | b <sup>+++</sup> | b <sup>0</sup> | b <sup>0++</sup> | Seq | y        | y <sup>++</sup> | y <sup>*</sup> | y <sup>+++</sup> | y <sup>0</sup> | y <sup>0++</sup> | RevNo |
|----|----------|-----------------|----------------|------------------|----------------|------------------|-----|----------|-----------------|----------------|------------------|----------------|------------------|-------|
| 1  | 246.16   | 123.58          |                |                  | 228.15         | 114.58           | T   |          |                 |                |                  |                |                  | 18    |
| 2  | 432.24   | 216.62          |                |                  | 414.23         | 207.62           | W   | 2,076.07 | 1,038.54        | 2,059.04       | 1,030.02         | 2,058.06       | 1,029.53         | 17    |
| 3  | 618.32   | 309.66          |                |                  | 600.31         | 300.66           | W   | 1,889.99 | 945.50          | 1,872.96       | 936.98           | 1,871.98       | 936.49           | 16    |
| 4  | 732.36   | 366.68          | 715.33         | 358.17           | 714.35         | 357.68           | N   | 1,703.91 | 852.46          | 1,686.88       | 843.94           | 1,685.90       | 843.45           | 15    |
| 5  | 861.40   | 431.20          | 844.37         | 422.69           | 843.39         | 422.20           | Q   | 1,589.86 | 795.44          | 1,572.84       | 786.92           | 1,571.85       | 786.43           | 14    |
| 6  | 1,008.47 | 504.74          | 991.44         | 496.23           | 990.46         | 495.73           | F   | 1,460.82 | 730.91          | 1,443.80       | 722.40           | 1,442.81       | 721.91           | 13    |
| 7  | 1,095.50 | 548.25          | 1,078.48       | 539.74           | 1,077.49       | 539.25           | S   | 1,313.75 | 657.38          | 1,296.73       | 648.87           | 1,295.74       | 648.38           | 12    |
| 8  | 1,194.57 | 597.79          | 1,177.54       | 589.28           | 1,176.56       | 588.78           | V   | 1,226.72 | 613.86          | 1,209.69       | 605.35           | 1,208.71       | 604.86           | 11    |
| 9  | 1,295.62 | 648.31          | 1,278.59       | 639.80           | 1,277.61       | 639.31           | T   | 1,127.65 | 564.33          | 1,110.63       | 555.82           | 1,109.64       | 555.32           | 10    |
| 10 | 1,366.65 | 683.83          | 1,349.63       | 675.32           | 1,348.64       | 674.83           | A   | 1,026.61 | 513.81          | 1,009.58       | 505.29           |                |                  | 9     |
| 11 | 1,479.74 | 740.37          | 1,462.71       | 731.86           | 1,461.73       | 731.37           | L   | 955.57   | 478.29          | 938.54         | 469.77           |                |                  | 8     |
| 12 | 1,607.80 | 804.40          | 1,590.77       | 795.89           | 1,589.79       | 795.40           | Q   | 842.48   | 421.75          | 825.46         | 413.23           |                |                  | 7     |
| 13 | 1,720.88 | 860.94          | 1,703.86       | 852.43           | 1,702.87       | 851.94           | L   | 714.43   | 357.72          | 697.40         | 349.20           |                |                  | 6     |
| 14 | 1,833.97 | 917.49          | 1,816.94       | 908.97           | 1,815.96       | 908.48           | L   | 601.34   | 301.17          | 584.32         | 292.66           |                |                  | 5     |
| 15 | 1,962.02 | 981.52          | 1,945.00       | 973.00           | 1,944.01       | 972.51           | Q   | 488.26   | 244.63          | 471.23         | 236.12           |                |                  | 4     |
| 16 | 2,033.06 | 1,017.03        | 2,016.03       | 1,008.52         | 2,015.05       | 1,008.03         | A   | 360.20   | 180.60          | 343.17         | 172.09           |                |                  | 3     |
| 17 | 2,147.10 | 1,074.06        | 2,130.08       | 1,065.54         | 2,129.09       | 1,065.05         | N   | 289.16   | 145.08          | 272.14         | 136.57           |                |                  | 2     |
| 18 |          |                 |                |                  |                |                  | R   | 175.12   | 88.06           | 158.09         | 79.55            |                |                  | 1     |

Query 995 Hit 1

MS/MS Fragmentation of **LITEDVQ GK**

Found in **sp|P61247|RS3A\_HUMAN**, 40S ribosomal protein S3a OS=Homo sapiens GN=RPS3A PE=1 SV=2

Match to Query 995: 1289.75from(645.8821,2+)

Title: 323: Sum of 2 scans in range 1147 (rt=33.8356, f=4, i=228) to 1148 (rt=33.861, f=4, i=229)  
 [D:\lab212\membrane\Grace\20120305-iTRAQ-1.raw]

Data File:

**Monoisotopic mass of neutral peptide Mr(calc): 1289.75**

**Variable modifications:**

**K9** iTRAQ4plex (K)

**Ions Score: 66.2 Expect: 0.000**

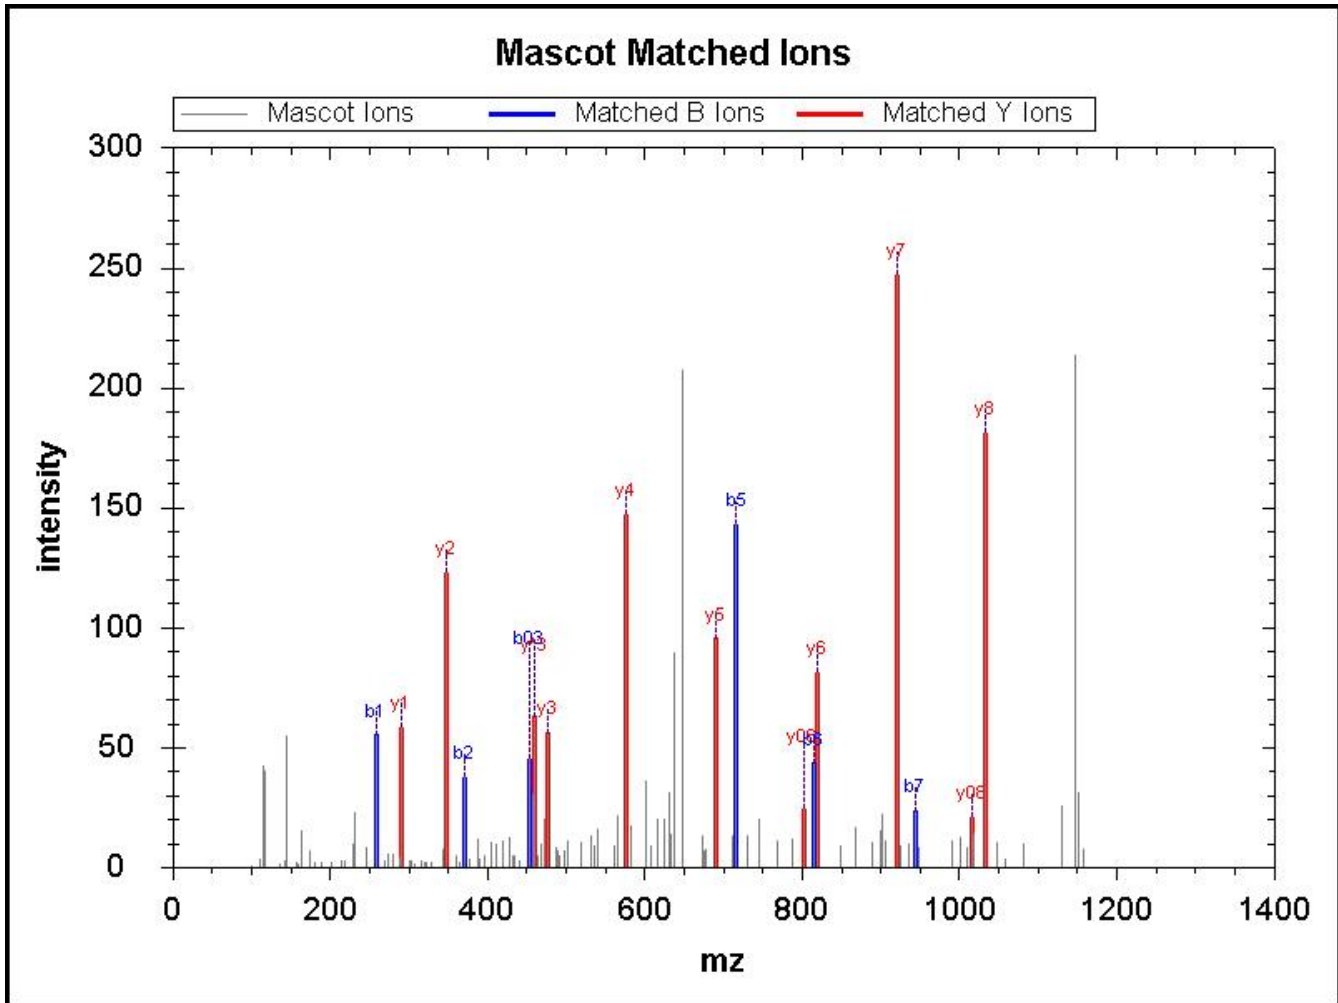

| No | b        | b++    | b*     | b*++   | b0     | b0++   | Seq | y        | y++    | y*       | y*++   | y0       | y0++   | RevNo |
|----|----------|--------|--------|--------|--------|--------|-----|----------|--------|----------|--------|----------|--------|-------|
| 1  | 258.19   | 129.60 |        |        |        |        | L   |          |        |          |        |          |        | 9     |
| 2  | 371.28   | 186.14 |        |        |        |        | I   | 1,033.56 | 517.29 | 1,016.54 | 508.77 | 1,015.55 | 508.28 | 8     |
| 3  | 472.33   | 236.67 |        |        | 454.31 | 227.66 | T   | 920.48   | 460.74 | 903.45   | 452.23 | 902.47   | 451.74 | 7     |
| 4  | 601.37   | 301.19 |        |        | 583.36 | 292.18 | E   | 819.43   | 410.22 | 802.41   | 401.71 | 801.42   | 401.21 | 6     |
| 5  | 716.39   | 358.70 |        |        | 698.38 | 349.70 | D   | 690.39   | 345.70 | 673.36   | 337.19 | 672.38   | 336.69 | 5     |
| 6  | 815.46   | 408.24 |        |        | 797.45 | 399.23 | V   | 575.36   | 288.19 | 558.34   | 279.67 |          |        | 4     |
| 7  | 943.52   | 472.26 | 926.50 | 463.75 | 925.51 | 463.26 | Q   | 476.29   | 238.65 | 459.27   | 230.14 |          |        | 3     |
| 8  | 1,000.54 | 500.78 | 983.52 | 492.26 | 982.53 | 491.77 | G   | 348.24   | 174.62 | 331.21   | 166.11 |          |        | 2     |
| 9  |          |        |        |        |        |        | K   | 291.21   | 146.11 | 274.19   | 137.60 |          |        | 1     |

Query 2490 Hit 1

MS/MS Fragmentation of **LASEILMQNWDAA MEDLTR**

Found in **sp|P60228|EIF3E\_HUMAN**, Eukaryotic translation initiation factor 3 subunit E OS=Homo sapiens GN=EIF3E PE=1 SV=1  
 Match to Query 2490: 2350.149 from (784.3903, 3+)

Title: 1190: Sum of 2 scans in range 3045 (rt=76.6007, f=4, i=840) to 3046 (rt=76.6262, f=4, i=841)

[D:\lab212\membrane\Grace\20120305-iTRAQ-1.raw]

Data File:

**Monoisotopic mass of neutral peptide Mr(calc): 2350.149**

**Variable modifications:**

**Ions Score: 66.06 Expect: 0.000**

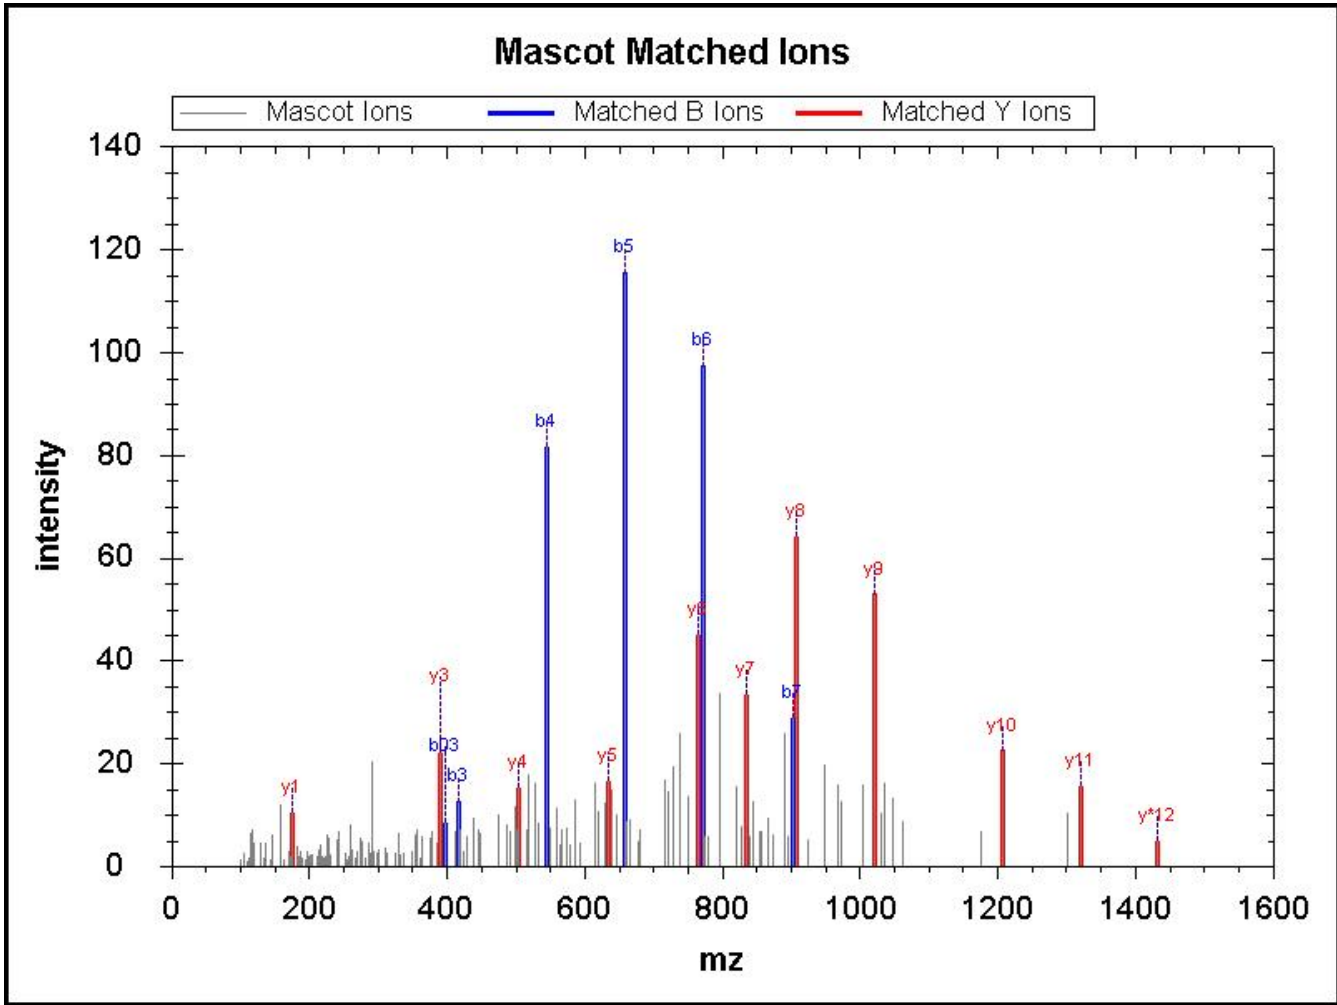

| No | b             | b++      | b*       | b*++     | b0            | b0++     | Seq | y               | y++      | y*              | y*++     | y0       | y0++     | RevNo |
|----|---------------|----------|----------|----------|---------------|----------|-----|-----------------|----------|-----------------|----------|----------|----------|-------|
| 1  | 258.19        | 129.60   |          |          |               |          | L   |                 |          |                 |          |          |          | 19    |
| 2  | 329.23        | 165.12   |          |          |               |          | A   | 2,093.96        | 1,047.49 | 2,076.94        | 1,038.97 | 2,075.95 | 1,038.48 | 18    |
| 3  | <b>416.26</b> | 208.63   |          |          | <b>398.25</b> | 199.63   | S   | 2,022.93        | 1,011.97 | 2,005.90        | 1,003.45 | 2,004.92 | 1,002.96 | 17    |
| 4  | <b>545.31</b> | 273.16   |          |          | 527.29        | 264.15   | E   | 1,935.89        | 968.45   | 1,918.87        | 959.94   | 1,917.88 | 959.45   | 16    |
| 5  | <b>658.39</b> | 329.70   |          |          | 640.38        | 320.69   | I   | 1,806.85        | 903.93   | 1,789.82        | 895.42   | 1,788.84 | 894.92   | 15    |
| 6  | <b>771.47</b> | 386.24   |          |          | 753.46        | 377.23   | L   | 1,693.77        | 847.39   | 1,676.74        | 838.87   | 1,675.76 | 838.38   | 14    |
| 7  | <b>902.51</b> | 451.76   |          |          | 884.50        | 442.76   | M   | 1,580.68        | 790.85   | 1,563.66        | 782.33   | 1,562.67 | 781.84   | 13    |
| 8  | 1,030.57      | 515.79   | 1,013.55 | 507.28   | 1,012.56      | 506.78   | Q   | 1,449.64        | 725.33   | <b>1,432.62</b> | 716.81   | 1,431.63 | 716.32   | 12    |
| 9  | 1,144.62      | 572.81   | 1,127.59 | 564.30   | 1,126.60      | 563.81   | N   | <b>1,321.58</b> | 661.30   | 1,304.56        | 652.78   | 1,303.57 | 652.29   | 11    |
| 10 | 1,330.69      | 665.85   | 1,313.67 | 657.34   | 1,312.68      | 656.85   | W   | <b>1,207.54</b> | 604.27   | 1,190.51        | 595.76   | 1,189.53 | 595.27   | 10    |
| 11 | 1,445.72      | 723.36   | 1,428.70 | 714.85   | 1,427.71      | 714.36   | D   | <b>1,021.46</b> | 511.23   | 1,004.44        | 502.72   | 1,003.45 | 502.23   | 9     |
| 12 | 1,516.76      | 758.88   | 1,499.73 | 750.37   | 1,498.75      | 749.88   | A   | <b>906.43</b>   | 453.72   | 889.41          | 445.21   | 888.42   | 444.72   | 8     |
| 13 | 1,587.80      | 794.40   | 1,570.77 | 785.89   | 1,569.79      | 785.40   | A   | <b>835.40</b>   | 418.20   | 818.37          | 409.69   | 817.39   | 409.20   | 7     |
| 14 | 1,718.84      | 859.92   | 1,701.81 | 851.41   | 1,700.83      | 850.92   | M   | <b>764.36</b>   | 382.68   | 747.33          | 374.17   | 746.35   | 373.68   | 6     |
| 15 | 1,847.88      | 924.44   | 1,830.85 | 915.93   | 1,829.87      | 915.44   | E   | <b>633.32</b>   | 317.16   | 616.29          | 308.65   | 615.31   | 308.16   | 5     |
| 16 | 1,962.91      | 981.96   | 1,945.88 | 973.44   | 1,944.90      | 972.95   | D   | <b>504.28</b>   | 252.64   | 487.25          | 244.13   | 486.27   | 243.64   | 4     |
| 17 | 2,075.99      | 1,038.50 | 2,058.96 | 1,029.99 | 2,057.98      | 1,029.49 | L   | <b>389.25</b>   | 195.13   | 372.22          | 186.62   | 371.24   | 186.12   | 3     |
| 18 | 2,177.04      | 1,089.02 | 2,160.01 | 1,080.51 | 2,159.03      | 1,080.02 | T   | 276.17          | 138.59   | 259.14          | 130.07   | 258.16   | 129.58   | 2     |
| 19 |               |          |          |          |               |          | R   | <b>175.12</b>   | 88.06    | 158.09          | 79.55    |          |          | 1     |

Query 1341 Hit 1

MS/MS Fragmentation of **TLNNDIMLIK**  
 Found in **sp|P07477|TRY1\_HUMAN**, Trypsin-1 OS=Homo sapiens GN=PRSS1 PE=1 SV=1



Match to Query 1341: 1462.833from(732.4239,2+)

Title: 692: Sum of 2 scans in range 1819 (rt=49.4253, f=4, i=478) to 1820 (rt=49.4507, f=4, i=479)

[D:\lab212\membrane\Grace\20120305-iTRAQ-2.raw]

Data File:

**Monoisotopic mass of neutral peptide Mr(calc): 1462.833**

**Variable modifications:**

**N3** :Deamidated (NQ)

**K10** :iTRAQ4plex (K)

**Ions Score: 64.81 Expect: 0.000**

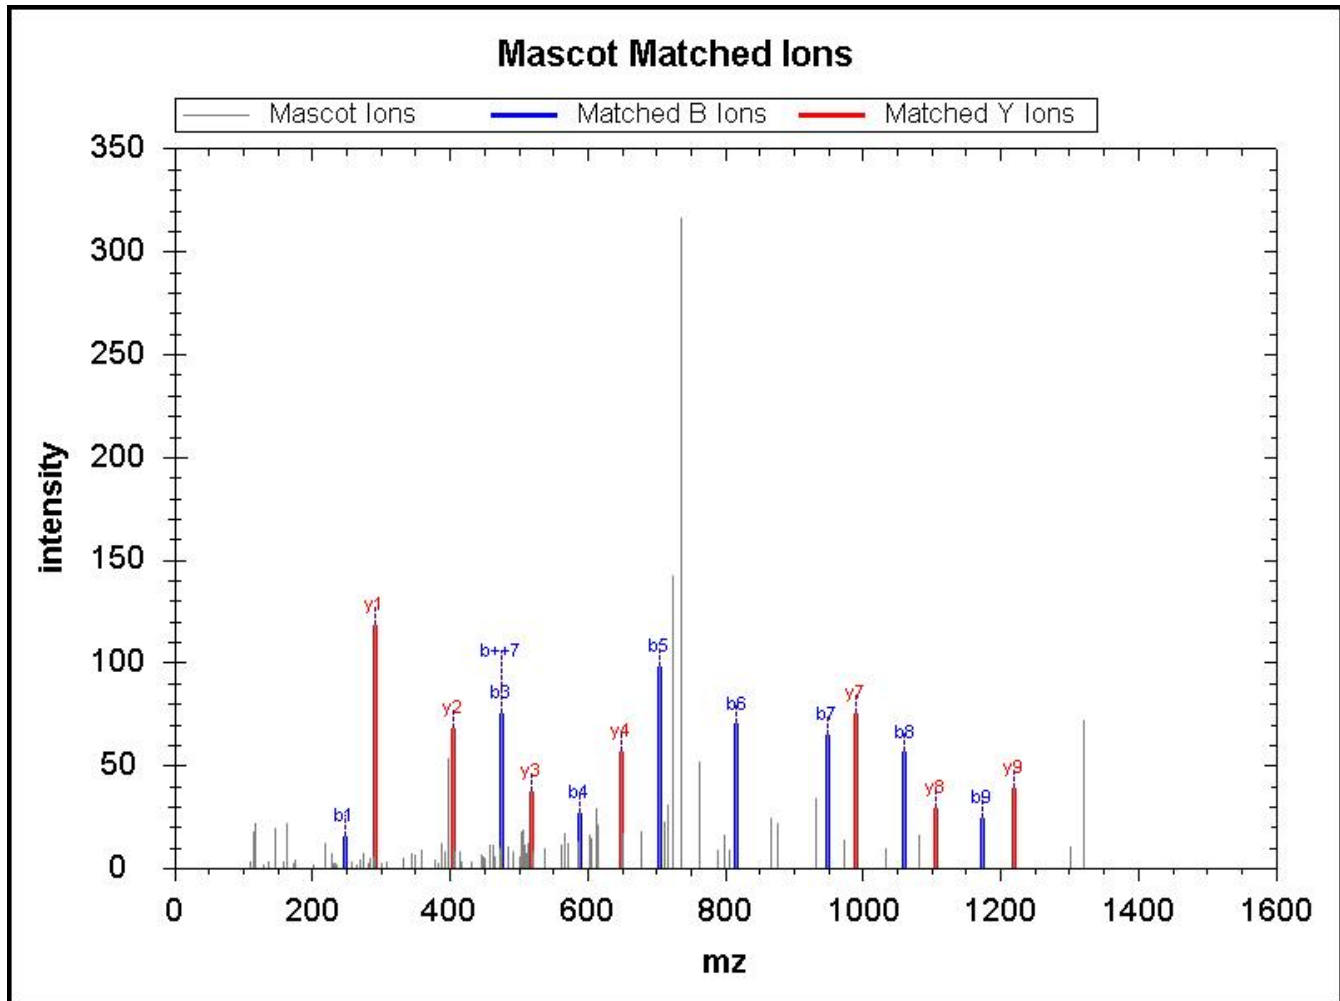

| No | b        | b++    | b*       | b*++   | b0       | b0++   | Seq | y        | y++    | y*       | y*++   | y0       | y0++   | RevNo |
|----|----------|--------|----------|--------|----------|--------|-----|----------|--------|----------|--------|----------|--------|-------|
| 1  | 246.16   | 123.58 |          |        | 228.15   | 114.58 | T   |          |        |          |        |          |        | 10    |
| 2  | 359.24   | 180.12 |          |        | 341.23   | 171.12 | L   | 1,218.69 | 609.85 | 1,201.66 | 601.33 | 1,200.68 | 600.84 | 9     |
| 3  | 474.27   | 237.64 | 457.24   | 229.12 | 456.26   | 228.63 | N   | 1,105.60 | 553.31 | 1,088.58 | 544.79 | 1,087.59 | 544.30 | 8     |
| 4  | 588.31   | 294.66 | 571.28   | 286.15 | 570.30   | 285.65 | N   | 990.58   | 495.79 | 973.55   | 487.28 | 972.57   | 486.79 | 7     |
| 5  | 703.34   | 352.17 | 686.31   | 343.66 | 685.33   | 343.17 | D   | 876.53   | 438.77 | 859.51   | 430.26 | 858.52   | 429.77 | 6     |
| 6  | 816.42   | 408.71 | 799.40   | 400.20 | 798.41   | 399.71 | I   | 761.51   | 381.26 | 744.48   | 372.74 |          |        | 5     |
| 7  | 947.46   | 474.23 | 930.44   | 465.72 | 929.45   | 465.23 | M   | 648.42   | 324.72 | 631.40   | 316.20 |          |        | 4     |
| 8  | 1,060.55 | 530.78 | 1,043.52 | 522.26 | 1,042.54 | 521.77 | L   | 517.38   | 259.20 | 500.36   | 250.68 |          |        | 3     |
| 9  | 1,173.63 | 587.32 | 1,156.60 | 578.81 | 1,155.62 | 578.31 | I   | 404.30   | 202.65 | 387.27   | 194.14 |          |        | 2     |
| 10 |          |        |          |        |          |        | K   | 291.21   | 146.11 | 274.19   | 137.60 |          |        | 1     |

Query 2212 Hit 1

MS/MS Fragmentation of **VLGILAMIDEGETDWK**

Found in **sp|Q15181|IPYR\_HUMAN**, Inorganic pyrophosphatase OS=Homo sapiens GN=PPA1 PE=1 SV=2

Match to Query 2212: 2077.115from(693.3789,3+)

Title: 1121: Sum of 2 scans in range 2871 (rt=72.6813, f=4, i=784) to 2872 (rt=72.7067, f=4, i=785)

[D:\lab212\membrane\Grace\20120305-iTRAQ-1.raw]

Data File:

Monoisotopic mass of neutral peptide Mr(calc): 2077.115

Variable modifications:

K16 iTRAQ4plex (K)

Ions Score: 62.8 Expect: 0.000

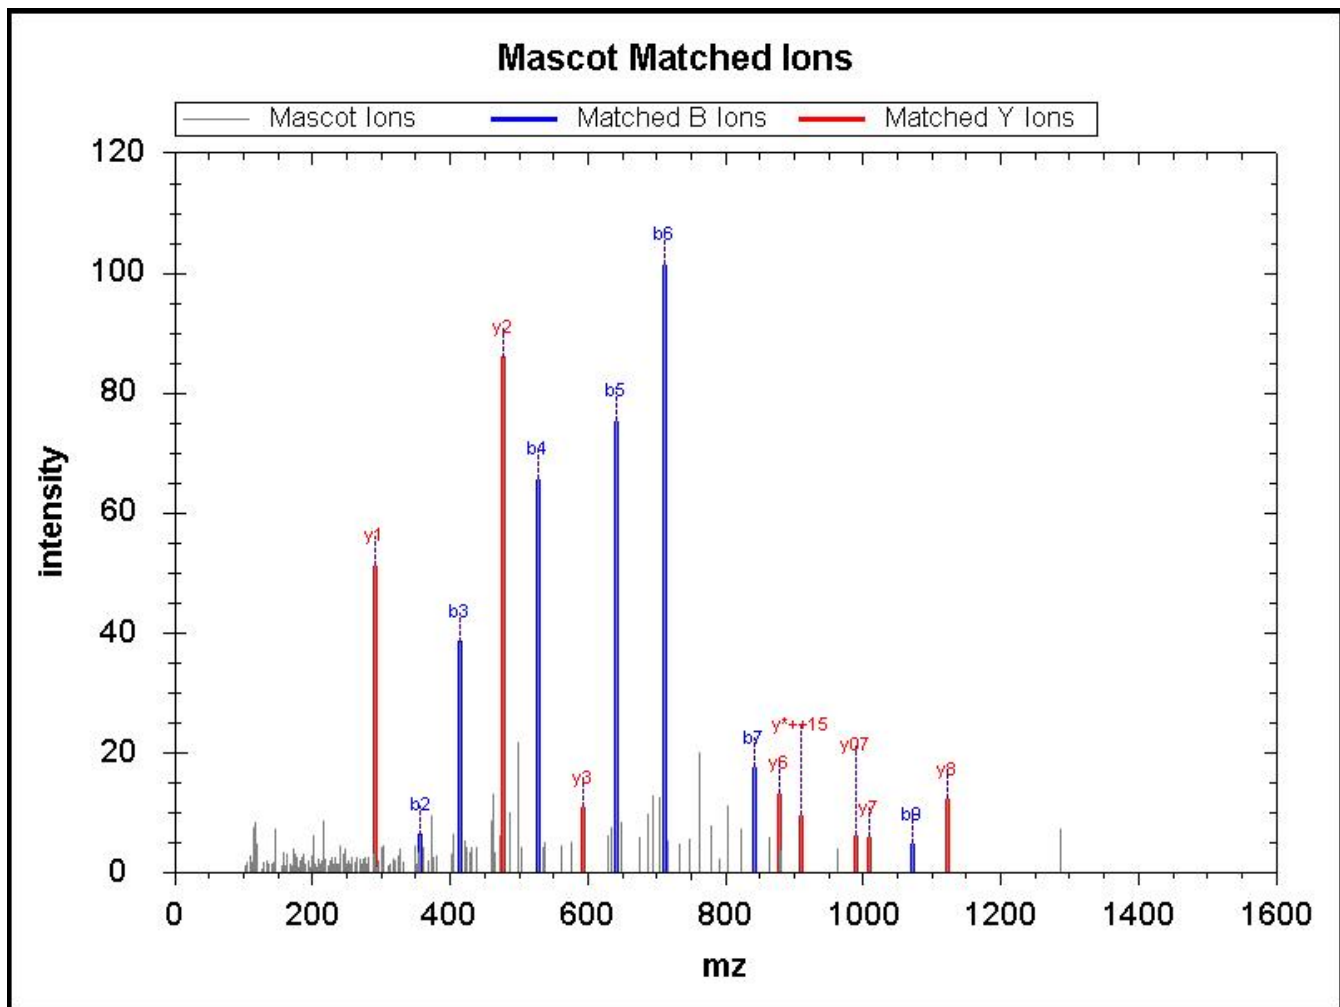

| No | b        | b++    | b0       | b0++   | Seq | y        | y++    | y*       | y*++   | y0       | y0++   | RevNo |
|----|----------|--------|----------|--------|-----|----------|--------|----------|--------|----------|--------|-------|
| 1  | 244.18   | 122.59 |          |        | V   |          |        |          |        |          |        | 16    |
| 2  | 357.26   | 179.13 |          |        | L   | 1,834.94 | 917.97 | 1,817.91 | 909.46 | 1,816.93 | 908.97 | 15    |
| 3  | 414.28   | 207.65 |          |        | G   | 1,721.85 | 861.43 | 1,704.83 | 852.92 | 1,703.84 | 852.43 | 14    |
| 4  | 527.37   | 264.19 |          |        | I   | 1,664.83 | 832.92 | 1,647.81 | 824.41 | 1,646.82 | 823.91 | 13    |
| 5  | 640.45   | 320.73 |          |        | L   | 1,551.75 | 776.38 | 1,534.72 | 767.86 | 1,533.74 | 767.37 | 12    |
| 6  | 711.49   | 356.25 |          |        | A   | 1,438.66 | 719.84 | 1,421.64 | 711.32 | 1,420.65 | 710.83 | 11    |
| 7  | 842.53   | 421.77 |          |        | M   | 1,367.63 | 684.32 | 1,350.60 | 675.80 | 1,349.62 | 675.31 | 10    |
| 8  | 955.61   | 478.31 |          |        | I   | 1,236.59 | 618.80 | 1,219.56 | 610.28 | 1,218.58 | 609.79 | 9     |
| 9  | 1,070.64 | 535.82 | 1,052.63 | 526.82 | D   | 1,123.50 | 562.25 | 1,106.48 | 553.74 | 1,105.49 | 553.25 | 8     |
| 10 | 1,199.68 | 600.34 | 1,181.67 | 591.34 | E   | 1,008.48 | 504.74 | 991.45   | 496.23 | 990.46   | 495.74 | 7     |
| 11 | 1,256.70 | 628.86 | 1,238.69 | 619.85 | G   | 879.43   | 440.22 | 862.41   | 431.71 | 861.42   | 431.21 | 6     |
| 12 | 1,385.75 | 693.38 | 1,367.74 | 684.37 | E   | 822.41   | 411.71 | 805.38   | 403.20 | 804.40   | 402.70 | 5     |
| 13 | 1,486.79 | 743.90 | 1,468.78 | 734.90 | T   | 693.37   | 347.19 | 676.34   | 338.67 | 675.36   | 338.18 | 4     |
| 14 | 1,601.82 | 801.41 | 1,583.81 | 792.41 | D   | 592.32   | 296.66 | 575.29   | 288.15 | 574.31   | 287.66 | 3     |
| 15 | 1,787.90 | 894.45 | 1,769.89 | 885.45 | W   | 477.29   | 239.15 | 460.27   | 230.64 |          |        | 2     |
| 16 |          |        |          |        | K   | 291.21   | 146.11 | 274.19   | 137.60 |          |        | 1     |

Query 2416 Hit 1

MS/MS Fragmentation of **LYSTWIGGSILASLDTFK**

Found in **sp|P42025|ACTY\_HUMAN**, Beta-actinin OS=Homo sapiens GN=ACTR1B PE=1 SV=1  
 Match to Query 2416: 2259.252from(754.0912,3+)

Title: 1241: Sum of 2 scans in range 3009 (rt=76.2404, f=4, i=862) to 3010 (rt=76.2658, f=4, i=863)  
 [D:\lab212\membrane\Grace\20120305-iTRAQ-2.raw]

Data File:

**Monoisotopic mass of neutral peptide Mr(calc): 2259.252**

**Variable modifications:**

**K18** iTRAQ4plex (K)

**Ions Score: 62.63 Expect: 0.000**

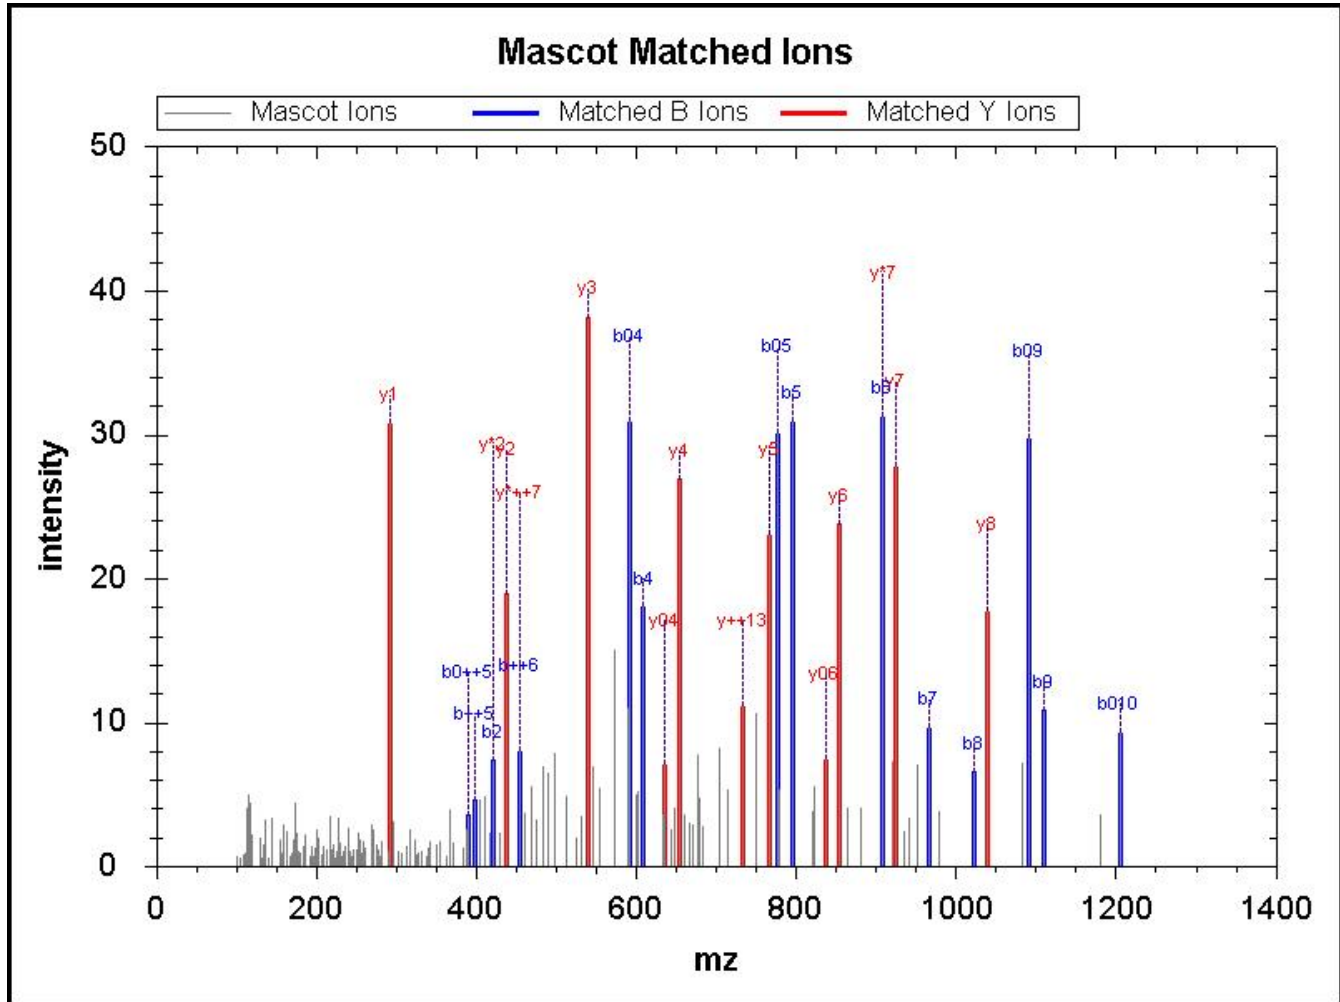

| No | b        | b++    | b0       | b0++   | Seq | y        | y++      | y*       | y*++   | y0       | y0++   | RevNo |
|----|----------|--------|----------|--------|-----|----------|----------|----------|--------|----------|--------|-------|
| 1  | 258.19   | 129.60 |          |        | L   |          |          |          |        |          |        | 18    |
| 2  | 421.26   | 211.13 |          |        | Y   | 2,003.06 | 1,002.03 | 1,986.03 | 993.52 | 1,985.05 | 993.03 | 17    |
| 3  | 508.29   | 254.65 | 490.28   | 245.64 | S   | 1,840.00 | 920.50   | 1,822.97 | 911.99 | 1,821.99 | 911.50 | 16    |
| 4  | 609.34   | 305.17 | 591.33   | 296.17 | T   | 1,752.97 | 876.99   | 1,735.94 | 868.47 | 1,734.95 | 867.98 | 15    |
| 5  | 795.42   | 398.21 | 777.41   | 389.21 | W   | 1,651.92 | 826.46   | 1,634.89 | 817.95 | 1,633.91 | 817.46 | 14    |
| 6  | 908.50   | 454.75 | 890.49   | 445.75 | I   | 1,465.84 | 733.42   | 1,448.81 | 724.91 | 1,447.83 | 724.42 | 13    |
| 7  | 965.52   | 483.26 | 947.51   | 474.26 | G   | 1,352.75 | 676.88   | 1,335.73 | 668.37 | 1,334.74 | 667.88 | 12    |
| 8  | 1,022.54 | 511.77 | 1,004.53 | 502.77 | G   | 1,295.73 | 648.37   | 1,278.71 | 639.86 | 1,277.72 | 639.36 | 11    |
| 9  | 1,109.57 | 555.29 | 1,091.56 | 546.29 | S   | 1,238.71 | 619.86   | 1,221.68 | 611.35 | 1,220.70 | 610.85 | 10    |
| 10 | 1,222.66 | 611.83 | 1,204.65 | 602.83 | I   | 1,151.68 | 576.34   | 1,134.65 | 567.83 | 1,133.67 | 567.34 | 9     |
| 11 | 1,335.74 | 668.38 | 1,317.73 | 659.37 | L   | 1,038.60 | 519.80   | 1,021.57 | 511.29 | 1,020.58 | 510.80 | 8     |
| 12 | 1,406.78 | 703.89 | 1,388.77 | 694.89 | A   | 925.51   | 463.26   | 908.48   | 454.75 | 907.50   | 454.25 | 7     |
| 13 | 1,493.81 | 747.41 | 1,475.80 | 738.40 | S   | 854.47   | 427.74   | 837.45   | 419.23 | 836.46   | 418.74 | 6     |
| 14 | 1,606.90 | 803.95 | 1,588.89 | 794.95 | L   | 767.44   | 384.22   | 750.42   | 375.71 | 749.43   | 375.22 | 5     |
| 15 | 1,721.92 | 861.47 | 1,703.91 | 852.46 | D   | 654.36   | 327.68   | 637.33   | 319.17 | 636.35   | 318.68 | 4     |
| 16 | 1,822.97 | 911.99 | 1,804.96 | 902.98 | T   | 539.33   | 270.17   | 522.30   | 261.66 | 521.32   | 261.16 | 3     |

|    |          |        |          |        |   |        |        |        |        |  |  |   |
|----|----------|--------|----------|--------|---|--------|--------|--------|--------|--|--|---|
| 17 | 1,970.04 | 985.52 | 1,952.03 | 976.52 | F | 438.28 | 219.65 | 421.26 | 211.13 |  |  | 2 |
| 18 |          |        |          |        | K | 291.21 | 146.11 | 274.19 | 137.60 |  |  | 1 |

Query 2116 Hit 1

MS/MS Fragmentation of **ALFEEVPELLTEAEK**

Found in **sp|P31939|PUR9\_HUMAN**, Bifunctional purine biosynthesis protein PURH OS=Homo sapiens GN=ATIC PE=1 SV=3

Match to Query 2116: 2005.098from(669.3732,3+)

Title: 1028: Sum of 2 scans in range 2544 (rt=65.7625, f=4, i=712) to 2545 (rt=65.7879, f=4, i=713)

[D:\lab212\membrane\Grace\20120305-iTRAQ-2.raw]

Data File:

**Monoisotopic mass of neutral peptide Mr(calc):** 2005.098

**Variable modifications:**

**K15** iTRAQ4plex (K)

**Ions Score:** 62.54 **Expect:** 0.000

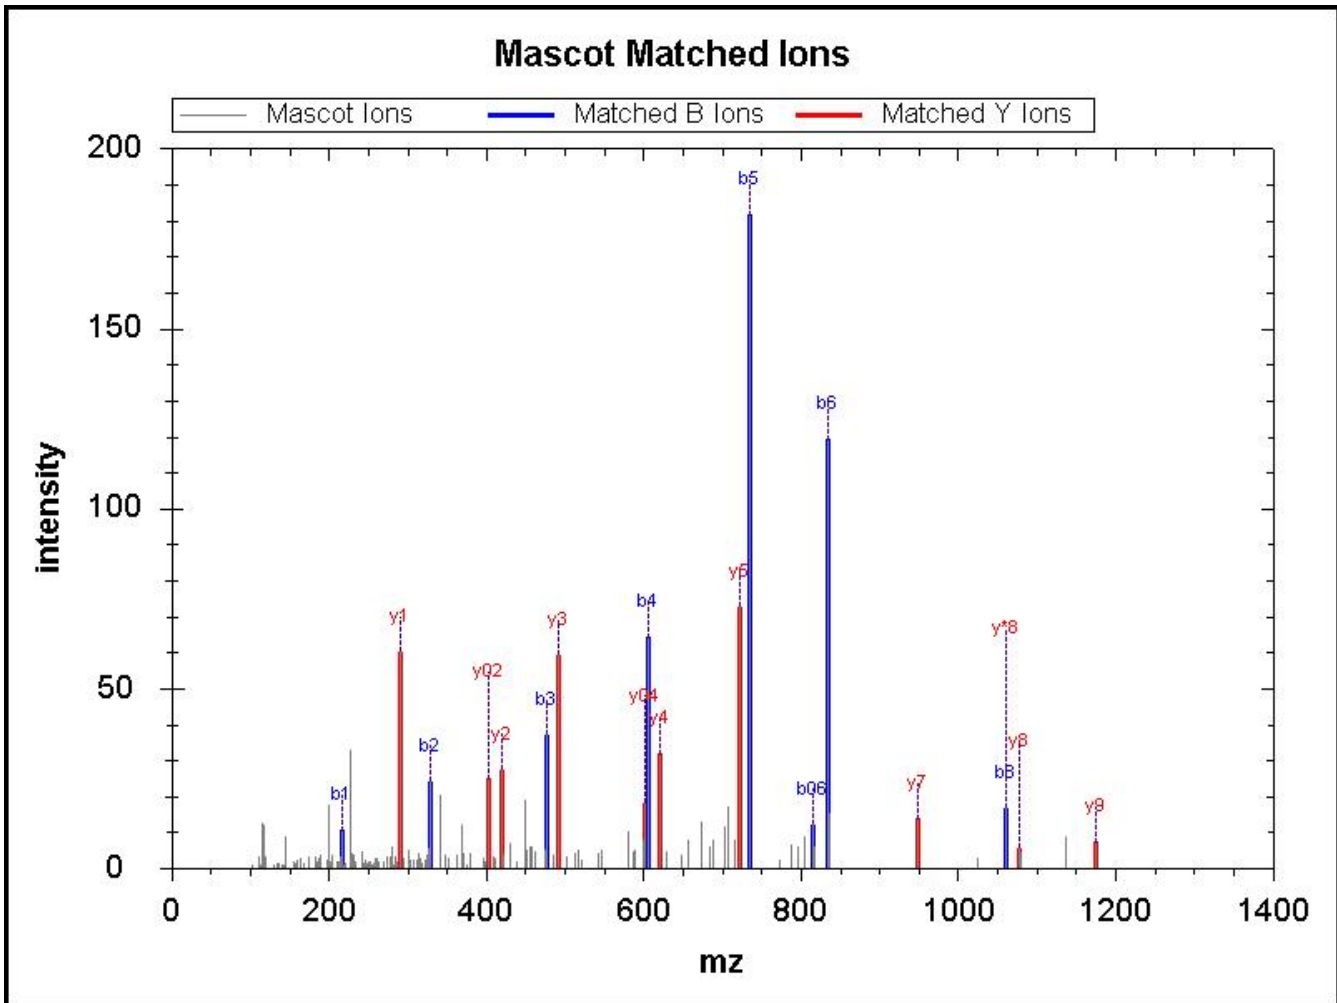

| No | b        | b++    | b0       | b0++   | Seq | y        | y++    | y*       | y*++   | y0       | y0++   | RevNo |
|----|----------|--------|----------|--------|-----|----------|--------|----------|--------|----------|--------|-------|
| 1  | 216.15   | 108.58 |          |        | A   |          |        |          |        |          |        | 15    |
| 2  | 329.23   | 165.12 |          |        | L   | 1,790.95 | 895.98 | 1,773.93 | 887.47 | 1,772.94 | 886.98 | 14    |
| 3  | 476.30   | 238.65 |          |        | F   | 1,677.87 | 839.44 | 1,660.84 | 830.93 | 1,659.86 | 830.43 | 13    |
| 4  | 605.34   | 303.17 | 587.33   | 294.17 | E   | 1,530.80 | 765.90 | 1,513.78 | 757.39 | 1,512.79 | 756.90 | 12    |
| 5  | 734.38   | 367.70 | 716.37   | 358.69 | E   | 1,401.76 | 701.38 | 1,384.73 | 692.87 | 1,383.75 | 692.38 | 11    |
| 6  | 833.45   | 417.23 | 815.44   | 408.22 | V   | 1,272.72 | 636.86 | 1,255.69 | 628.35 | 1,254.71 | 627.86 | 10    |
| 7  | 930.51   | 465.76 | 912.49   | 456.75 | P   | 1,173.65 | 587.33 | 1,156.62 | 578.81 | 1,155.64 | 578.32 | 9     |
| 8  | 1,059.55 | 530.28 | 1,041.54 | 521.27 | E   | 1,076.60 | 538.80 | 1,059.57 | 530.29 | 1,058.58 | 529.80 | 8     |
| 9  | 1,172.63 | 586.82 | 1,154.62 | 577.81 | L   | 947.55   | 474.28 | 930.53   | 465.77 | 929.54   | 465.27 | 7     |
| 10 | 1,285.72 | 643.36 | 1,267.71 | 634.36 | L   | 834.47   | 417.74 | 817.44   | 409.22 | 816.46   | 408.73 | 6     |
| 11 | 1,386.76 | 693.89 | 1,368.75 | 684.88 | T   | 721.38   | 361.20 | 704.36   | 352.68 | 703.37   | 352.19 | 5     |

|    |          |        |          |        |   |        |        |        |        |        |        |   |
|----|----------|--------|----------|--------|---|--------|--------|--------|--------|--------|--------|---|
| 12 | 1,515.81 | 758.41 | 1,497.80 | 749.40 | E | 620.34 | 310.67 | 603.31 | 302.16 | 602.33 | 301.67 | 4 |
| 13 | 1,586.84 | 793.93 | 1,568.83 | 784.92 | A | 491.29 | 246.15 | 474.27 | 237.64 | 473.28 | 237.15 | 3 |
| 14 | 1,715.89 | 858.45 | 1,697.88 | 849.44 | E | 420.26 | 210.63 | 403.23 | 202.12 | 402.25 | 201.63 | 2 |
| 15 |          |        |          |        | K | 291.21 | 146.11 | 274.19 | 137.60 |        |        | 1 |

Query 1840 Hit 1

MS/MS Fragmentation of **HDADGQATLLNLLL**

Found in **sp|O43242|PSMD3\_HUMAN**, 26S proteasome non-ATPase regulatory subunit 3 OS=Homo sapiens GN=PSMD3 PE=1 SV=2

Match to Query 1840: 1792.999from(598.6736,3+)

Title: 946: Scan 2363 (rt=61.6818, f=3, i=330) [D:\lab212\membrane\Grace\20120305-iTRAQ-2.raw]

Data File:

**Monoisotopic mass of neutral peptide Mr(calc): 1792.999**

**Variable modifications:**

**Ions Score: 60.84 Expect: 0.001**

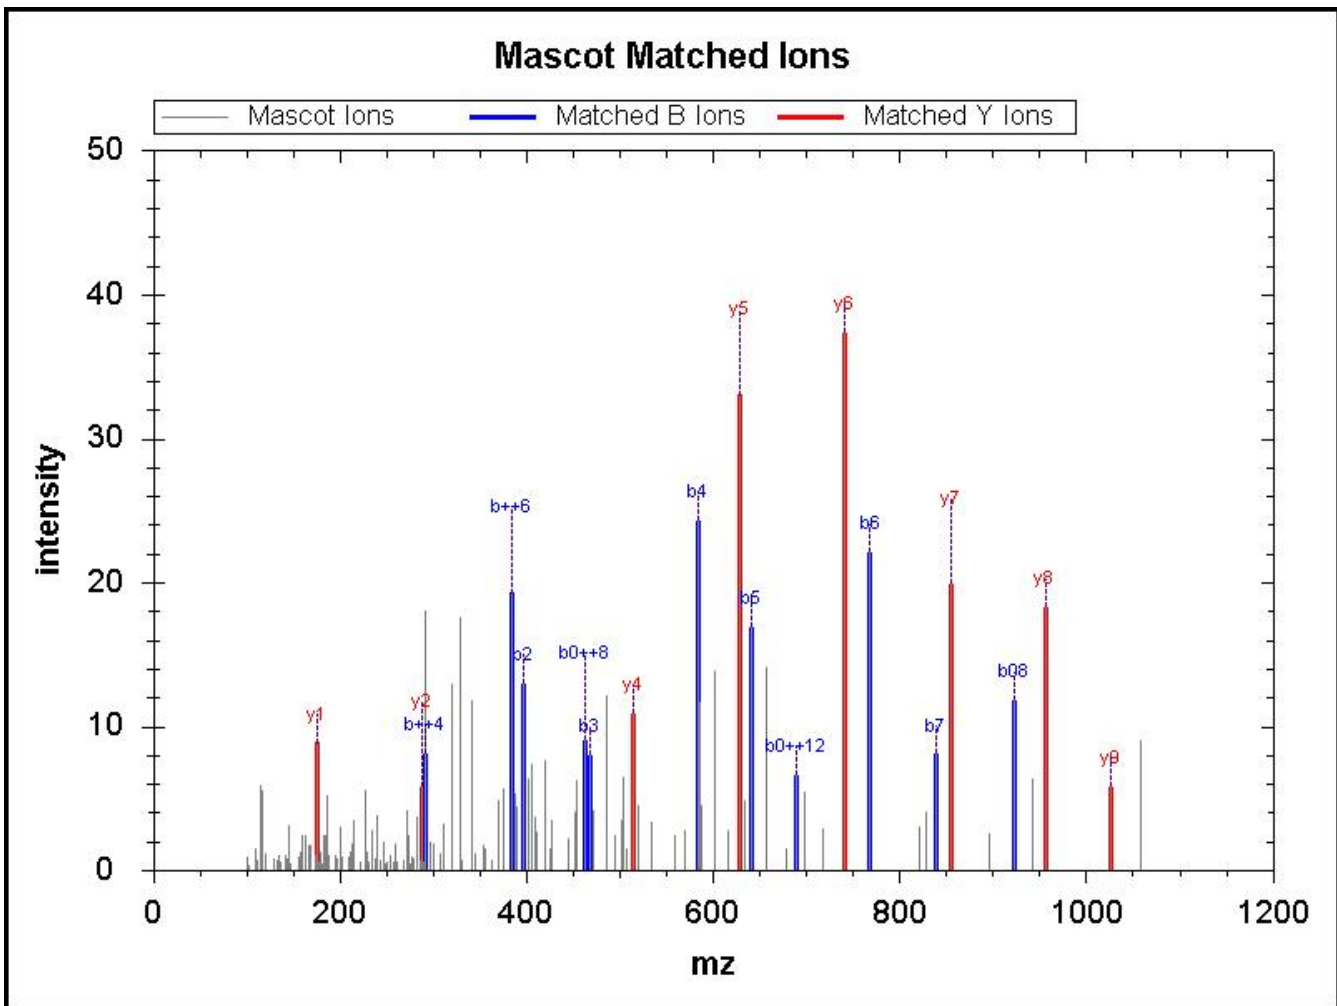

| No | b        | b++    | b*       | b*++   | b0       | b0++   | Seq | y        | y++    | y*       | y*++   | y0       | y0++   | RevNo |
|----|----------|--------|----------|--------|----------|--------|-----|----------|--------|----------|--------|----------|--------|-------|
| 1  | 282.17   | 141.59 |          |        |          |        | H   |          |        |          |        |          |        | 15    |
| 2  | 397.20   | 199.10 |          |        | 379.18   | 190.10 | D   | 1,512.84 | 756.92 | 1,495.81 | 748.41 | 1,494.83 | 747.92 | 14    |
| 3  | 468.23   | 234.62 |          |        | 450.22   | 225.61 | A   | 1,397.81 | 699.41 | 1,380.78 | 690.90 | 1,379.80 | 690.40 | 13    |
| 4  | 583.26   | 292.13 |          |        | 565.25   | 283.13 | D   | 1,326.77 | 663.89 | 1,309.75 | 655.38 | 1,308.76 | 654.89 | 12    |
| 5  | 640.28   | 320.64 |          |        | 622.27   | 311.64 | G   | 1,211.75 | 606.38 | 1,194.72 | 597.86 | 1,193.74 | 597.37 | 11    |
| 6  | 768.34   | 384.67 | 751.31   | 376.16 | 750.33   | 375.67 | Q   | 1,154.73 | 577.87 | 1,137.70 | 569.35 | 1,136.71 | 568.86 | 10    |
| 7  | 839.38   | 420.19 | 822.35   | 411.68 | 821.37   | 411.19 | A   | 1,026.67 | 513.84 | 1,009.64 | 505.32 | 1,008.66 | 504.83 | 9     |
| 8  | 940.42   | 470.72 | 923.40   | 462.20 | 922.41   | 461.71 | T   | 955.63   | 478.32 | 938.60   | 469.81 | 937.62   | 469.31 | 8     |
| 9  | 1,053.51 | 527.26 | 1,036.48 | 518.74 | 1,035.50 | 518.25 | L   | 854.58   | 427.79 | 837.56   | 419.28 |          |        | 7     |

|    |          |        |          |        |          |        |   |        |        |        |        |  |  |   |
|----|----------|--------|----------|--------|----------|--------|---|--------|--------|--------|--------|--|--|---|
| 10 | 1,166.59 | 583.80 | 1,149.57 | 575.29 | 1,148.58 | 574.79 | L | 741.50 | 371.25 | 724.47 | 362.74 |  |  | 6 |
| 11 | 1,280.64 | 640.82 | 1,263.61 | 632.31 | 1,262.62 | 631.82 | N | 628.41 | 314.71 | 611.39 | 306.20 |  |  | 5 |
| 12 | 1,393.72 | 697.36 | 1,376.69 | 688.85 | 1,375.71 | 688.36 | L | 514.37 | 257.69 | 497.34 | 249.18 |  |  | 4 |
| 13 | 1,506.80 | 753.91 | 1,489.78 | 745.39 | 1,488.79 | 744.90 | L | 401.29 | 201.15 | 384.26 | 192.63 |  |  | 3 |
| 14 | 1,619.89 | 810.45 | 1,602.86 | 801.93 | 1,601.88 | 801.44 | L | 288.20 | 144.61 | 271.18 | 136.09 |  |  | 2 |
| 15 |          |        |          |        |          |        | R | 175.12 | 88.06  | 158.09 | 79.55  |  |  | 1 |

Query 2576 Hit 1

MS/MS Fragmentation of **ELNELVSAIEEHFFQPQK**

Found in **sp|Q96G03|PGM2\_HUMAN**, Phosphoglucosyltransferase-2 OS=Homo sapiens GN=PGM2 PE=1 SV=4

Match to Query 2576: 2445.285 from (816.1022,3+)

Title: 1152: Sum of 2 scans in range 2952 (rt=74.5052, f=4, i=810) to 2953 (rt=74.5306, f=4, i=811)

[D:\lab212\membrane\Grace\20120305-iTRAQ-1.raw]

Data File:

**Monoisotopic mass of neutral peptide Mr(calc): 2445.285**

**Variable modifications:**

**K18** :iTRAQ4plex (K)

**Ions Score: 60.54 Expect: 0.001**

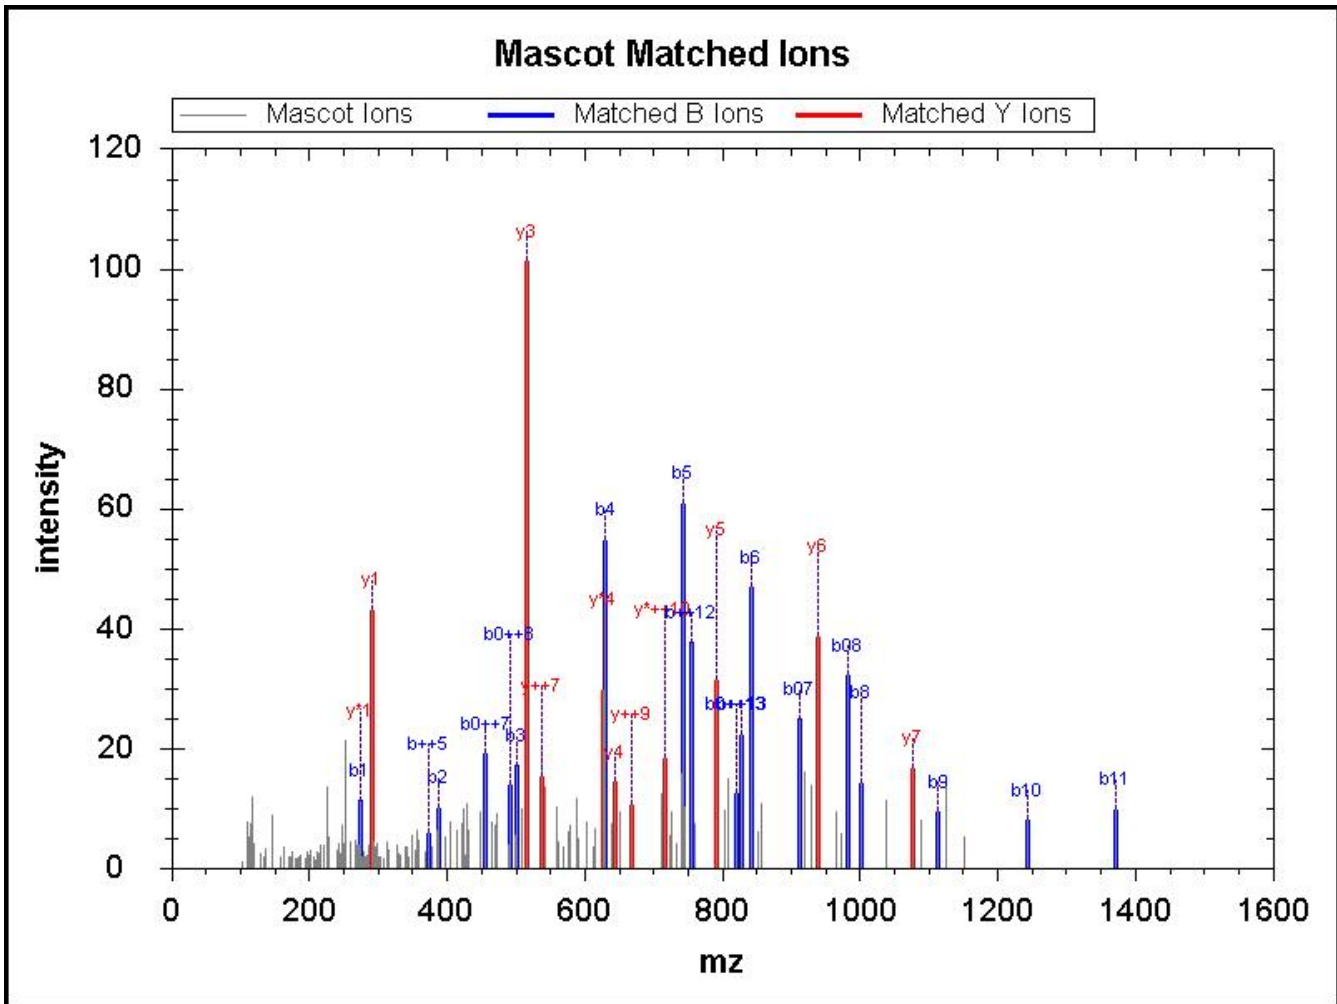

| No | b      | b++    | b*     | b*++   | b0     | b0++   | Seq | y        | y++      | y*       | y*++     | y0       | y0++     | RevNo |
|----|--------|--------|--------|--------|--------|--------|-----|----------|----------|----------|----------|----------|----------|-------|
| 1  | 274.15 | 137.58 |        |        | 256.14 | 128.57 | E   |          |          |          |          |          |          | 18    |
| 2  | 387.24 | 194.12 |        |        | 369.23 | 185.12 | L   | 2,173.14 | 1,087.07 | 2,156.11 | 1,078.56 | 2,155.13 | 1,078.07 | 17    |
| 3  | 501.28 | 251.14 | 484.25 | 242.63 | 483.27 | 242.14 | N   | 2,060.06 | 1,030.53 | 2,043.03 | 1,022.02 | 2,042.05 | 1,021.53 | 16    |
| 4  | 630.32 | 315.66 | 613.29 | 307.15 | 612.31 | 306.66 | E   | 1,946.01 | 973.51   | 1,928.99 | 965.00   | 1,928.00 | 964.51   | 15    |
| 5  | 743.41 | 372.21 | 726.38 | 363.69 | 725.39 | 363.20 | L   | 1,816.97 | 908.99   | 1,799.94 | 900.48   | 1,798.96 | 899.98   | 14    |
| 6  | 842.47 | 421.74 | 825.45 | 413.23 | 824.46 | 412.74 | V   | 1,703.89 | 852.45   | 1,686.86 | 843.93   | 1,685.88 | 843.44   | 13    |
| 7  | 929.51 | 465.26 | 912.48 | 456.74 | 911.50 | 456.25 | S   | 1,604.82 | 802.91   | 1,587.79 | 794.40   | 1,586.81 | 793.91   | 12    |

|    |          |          |          |          |          |          |   |          |        |          |        |          |        |    |
|----|----------|----------|----------|----------|----------|----------|---|----------|--------|----------|--------|----------|--------|----|
| 8  | 1,000.54 | 500.78   | 983.52   | 492.26   | 982.53   | 491.77   | A | 1,517.79 | 759.40 | 1,500.76 | 750.88 | 1,499.78 | 750.39 | 11 |
| 9  | 1,113.63 | 557.32   | 1,096.60 | 548.80   | 1,095.62 | 548.31   | I | 1,446.75 | 723.88 | 1,429.72 | 715.37 | 1,428.74 | 714.87 | 10 |
| 10 | 1,242.67 | 621.84   | 1,225.64 | 613.33   | 1,224.66 | 612.83   | E | 1,333.67 | 667.34 | 1,316.64 | 658.82 | 1,315.66 | 658.33 | 9  |
| 11 | 1,371.71 | 686.36   | 1,354.69 | 677.85   | 1,353.70 | 677.35   | E | 1,204.62 | 602.82 | 1,187.60 | 594.30 | 1,186.61 | 593.81 | 8  |
| 12 | 1,508.77 | 754.89   | 1,491.74 | 746.38   | 1,490.76 | 745.88   | H | 1,075.58 | 538.29 | 1,058.55 | 529.78 |          |        | 7  |
| 13 | 1,655.84 | 828.42   | 1,638.81 | 819.91   | 1,637.83 | 819.42   | F | 938.52   | 469.76 | 921.50   | 461.25 |          |        | 6  |
| 14 | 1,802.91 | 901.96   | 1,785.88 | 893.44   | 1,784.90 | 892.95   | F | 791.45   | 396.23 | 774.43   | 387.72 |          |        | 5  |
| 15 | 1,930.97 | 965.99   | 1,913.94 | 957.47   | 1,912.96 | 956.98   | Q | 644.38   | 322.70 | 627.36   | 314.18 |          |        | 4  |
| 16 | 2,028.02 | 1,014.51 | 2,010.99 | 1,006.00 | 2,010.01 | 1,005.51 | P | 516.33   | 258.67 | 499.30   | 250.15 |          |        | 3  |
| 17 | 2,156.08 | 1,078.54 | 2,139.05 | 1,070.03 | 2,138.07 | 1,069.54 | Q | 419.27   | 210.14 | 402.25   | 201.63 |          |        | 2  |
| 18 |          |          |          |          |          |          | K | 291.21   | 146.11 | 274.19   | 137.60 |          |        | 1  |

Query 551 Hit 1

MS/MS Fragmentation of **VEEIAASK**

Found in **sp|Q02543|RL18A\_HUMAN**, 60S ribosomal protein L18a OS=Homo sapiens GN=RPL18A PE=1 SV=2

Match to Query 551: 1133.658from(567.8362,2+)

Title: 268: Sum of 2 scans in range 901 (rt=28.7413, f=4, i=182) to 902 (rt=28.7667, f=4, i=183) [D:\lab212\membrane\Grace\20120305-iTRAQ-2.raw]

Data File:

**Monoisotopic mass of neutral peptide Mr(calc):** 1133.658

**Variable modifications:**

**K8** iTRAQ4plex (K)

**Ions Score:** 60.48 **Expect:** 0.001

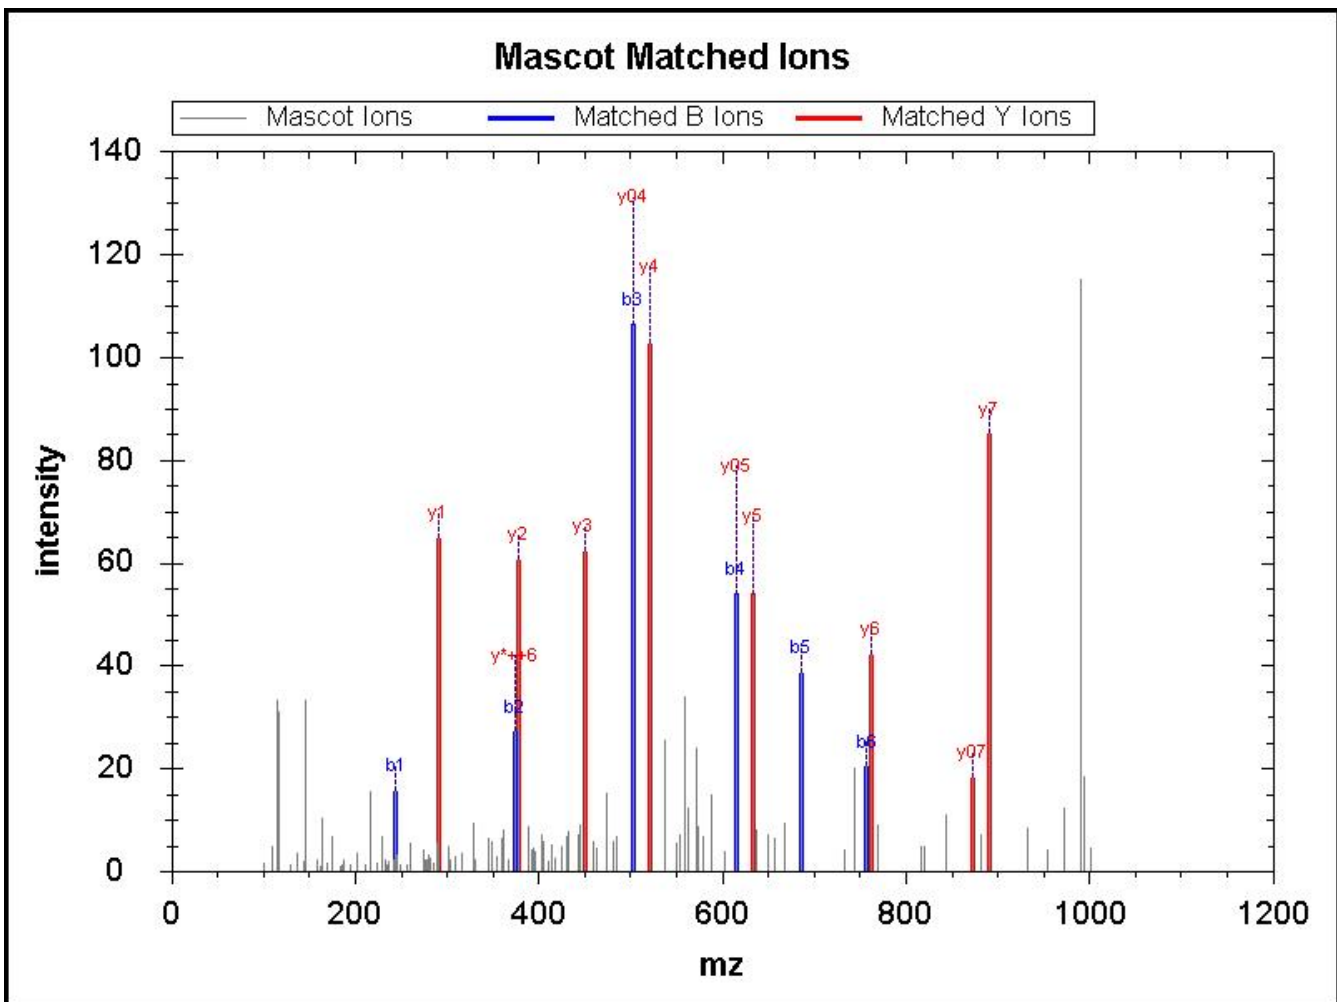

| No | b      | b++    | b0     | b0++   | Seq | y      | y++    | y*     | y*++   | y0     | y0++   | RevNo |
|----|--------|--------|--------|--------|-----|--------|--------|--------|--------|--------|--------|-------|
| 1  | 244.18 | 122.59 |        |        | V   |        |        |        |        |        |        | 8     |
| 2  | 373.22 | 187.11 | 355.21 | 178.11 | E   | 891.49 | 446.25 | 874.46 | 437.74 | 873.48 | 437.24 | 7     |

|   |        |        |        |        |   |        |        |        |        |        |        |   |
|---|--------|--------|--------|--------|---|--------|--------|--------|--------|--------|--------|---|
| 3 | 502.26 | 251.64 | 484.25 | 242.63 | E | 762.45 | 381.73 | 745.42 | 373.21 | 744.44 | 372.72 | 6 |
| 4 | 615.35 | 308.18 | 597.34 | 299.17 | I | 633.41 | 317.21 | 616.38 | 308.69 | 615.39 | 308.20 | 5 |
| 5 | 686.38 | 343.70 | 668.37 | 334.69 | A | 520.32 | 260.66 | 503.29 | 252.15 | 502.31 | 251.66 | 4 |
| 6 | 757.42 | 379.21 | 739.41 | 370.21 | A | 449.28 | 225.15 | 432.26 | 216.63 | 431.27 | 216.14 | 3 |
| 7 | 844.45 | 422.73 | 826.44 | 413.72 | S | 378.25 | 189.63 | 361.22 | 181.11 | 360.24 | 180.62 | 2 |
| 8 |        |        |        |        | K | 291.21 | 146.11 | 274.19 | 137.60 |        |        | 1 |

Query 2301 Hit 1

MS/MS Fragmentation of **YELPLVIQALTNIEDK**

Found in **sp|Q96QD8|S38A2\_HUMAN**, Sodium-coupled neutral amino acid transporter 2 OS=Homo sapiens GN=SLC38A2 PE=1 SV=2

Match to Query 2301: 2146.227from(716.4163,3+)

Title: 1214: Scan 2946 (rt=74.8177, f=3, i=424) [D:\lab212\membrane\Grace\20120305-iTRAQ-2.raw]

Data File:

**Monoisotopic mass of neutral peptide Mr(calc): 2146.227**

**Variable modifications:**

**K16** iTRAQ4plex (K)

**Ions Score: 59.98 Expect: 0.000**

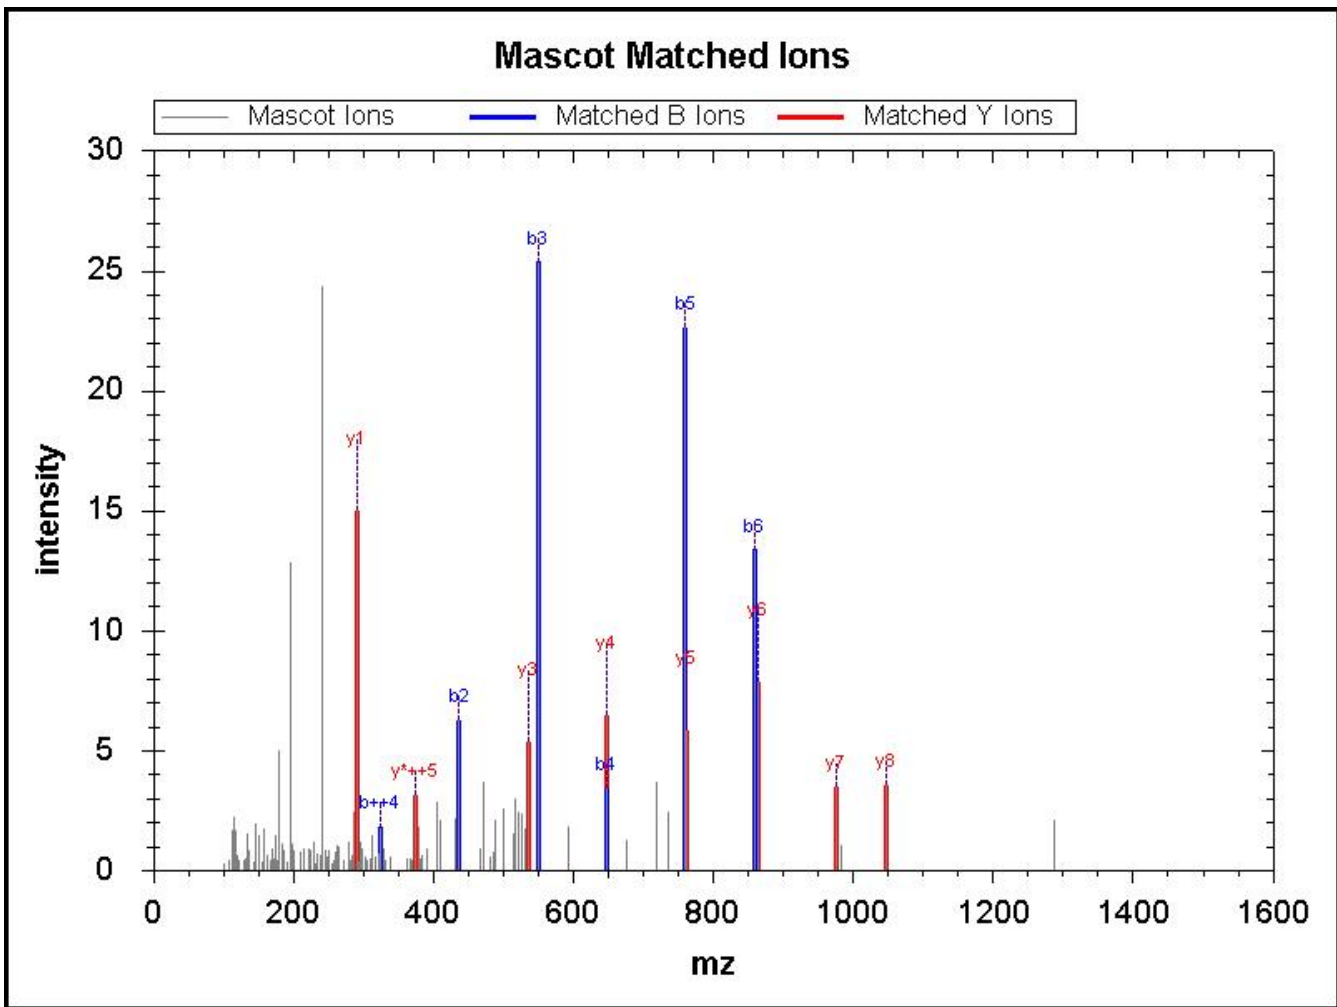

| No | b      | b++    | b* | b*++ | b0     | b0++   | Seq | y        | y++    | y*       | y*++   | y0       | y0++   | RevNo |
|----|--------|--------|----|------|--------|--------|-----|----------|--------|----------|--------|----------|--------|-------|
| 1  | 308.17 | 154.59 |    |      |        |        | Y   |          |        |          |        |          |        | 16    |
| 2  | 437.22 | 219.11 |    |      | 419.20 | 210.11 | E   | 1,840.05 | 920.53 | 1,823.03 | 912.02 | 1,822.04 | 911.53 | 15    |
| 3  | 550.30 | 275.65 |    |      | 532.29 | 266.65 | L   | 1,711.01 | 856.01 | 1,693.99 | 847.50 | 1,693.00 | 847.00 | 14    |
| 4  | 647.35 | 324.18 |    |      | 629.34 | 315.17 | P   | 1,597.93 | 799.47 | 1,580.90 | 790.95 | 1,579.92 | 790.46 | 13    |
| 5  | 760.44 | 380.72 |    |      | 742.43 | 371.72 | L   | 1,500.88 | 750.94 | 1,483.85 | 742.43 | 1,482.86 | 741.94 | 12    |
| 6  | 859.50 | 430.26 |    |      | 841.49 | 421.25 | V   | 1,387.79 | 694.40 | 1,370.76 | 685.89 | 1,369.78 | 685.39 | 11    |
| 7  | 972.59 | 486.80 |    |      | 954.58 | 477.79 | I   | 1,288.72 | 644.87 | 1,271.70 | 636.35 | 1,270.71 | 635.86 | 10    |



|    |          |        |          |        |          |        |   |          |        |          |        |          |        |   |
|----|----------|--------|----------|--------|----------|--------|---|----------|--------|----------|--------|----------|--------|---|
| 8  | 1,100.65 | 550.83 | 1,083.62 | 542.31 | 1,082.64 | 541.82 | Q | 1,175.64 | 588.32 | 1,158.61 | 579.81 | 1,157.63 | 579.32 | 9 |
| 9  | 1,171.68 | 586.35 | 1,154.66 | 577.83 | 1,153.67 | 577.34 | A | 1,047.58 | 524.29 | 1,030.55 | 515.78 | 1,029.57 | 515.29 | 8 |
| 10 | 1,284.77 | 642.89 | 1,267.74 | 634.37 | 1,266.76 | 633.88 | L | 976.54   | 488.78 | 959.52   | 480.26 | 958.53   | 479.77 | 7 |
| 11 | 1,385.82 | 693.41 | 1,368.79 | 684.90 | 1,367.81 | 684.41 | T | 863.46   | 432.23 | 846.43   | 423.72 | 845.45   | 423.23 | 6 |
| 12 | 1,499.86 | 750.43 | 1,482.83 | 741.92 | 1,481.85 | 741.43 | N | 762.41   | 381.71 | 745.38   | 373.20 | 744.40   | 372.70 | 5 |
| 13 | 1,612.94 | 806.98 | 1,595.92 | 798.46 | 1,594.93 | 797.97 | I | 648.37   | 324.69 | 631.34   | 316.17 | 630.36   | 315.68 | 4 |
| 14 | 1,741.99 | 871.50 | 1,724.96 | 862.98 | 1,723.98 | 862.49 | E | 535.28   | 268.15 | 518.26   | 259.63 | 517.27   | 259.14 | 3 |
| 15 | 1,857.01 | 929.01 | 1,839.99 | 920.50 | 1,839.00 | 920.00 | D | 406.24   | 203.62 | 389.22   | 195.11 | 388.23   | 194.62 | 2 |
| 16 |          |        |          |        |          |        | K | 291.21   | 146.11 | 274.19   | 137.60 |          |        | 1 |

Query 2318 Hit 1

MS/MS Fragmentation of **GQNLLLTNLQTIQGILER**

Found in **sp|P12270|TPR\_HUMAN**, Nucleoprotein TPR OS=Homo sapiens GN=TPR PE=1 SV=3

Match to Query 2318: 2167.252from(723.4245,3+)

Title: 1209: Sum of 2 scans in range 2935 (rt=74.5716, f=4, i=838) to 2936 (rt=74.597, f=4, i=839)

[D:\lab212\membrane\Grace\20120305-iTRAQ-2.raw]

Data File:

**Monoisotopic mass of neutral peptide Mr(calc): 2167.252**

**Variable modifications:**

**Ions Score: 59.53 Expect: 0.000**

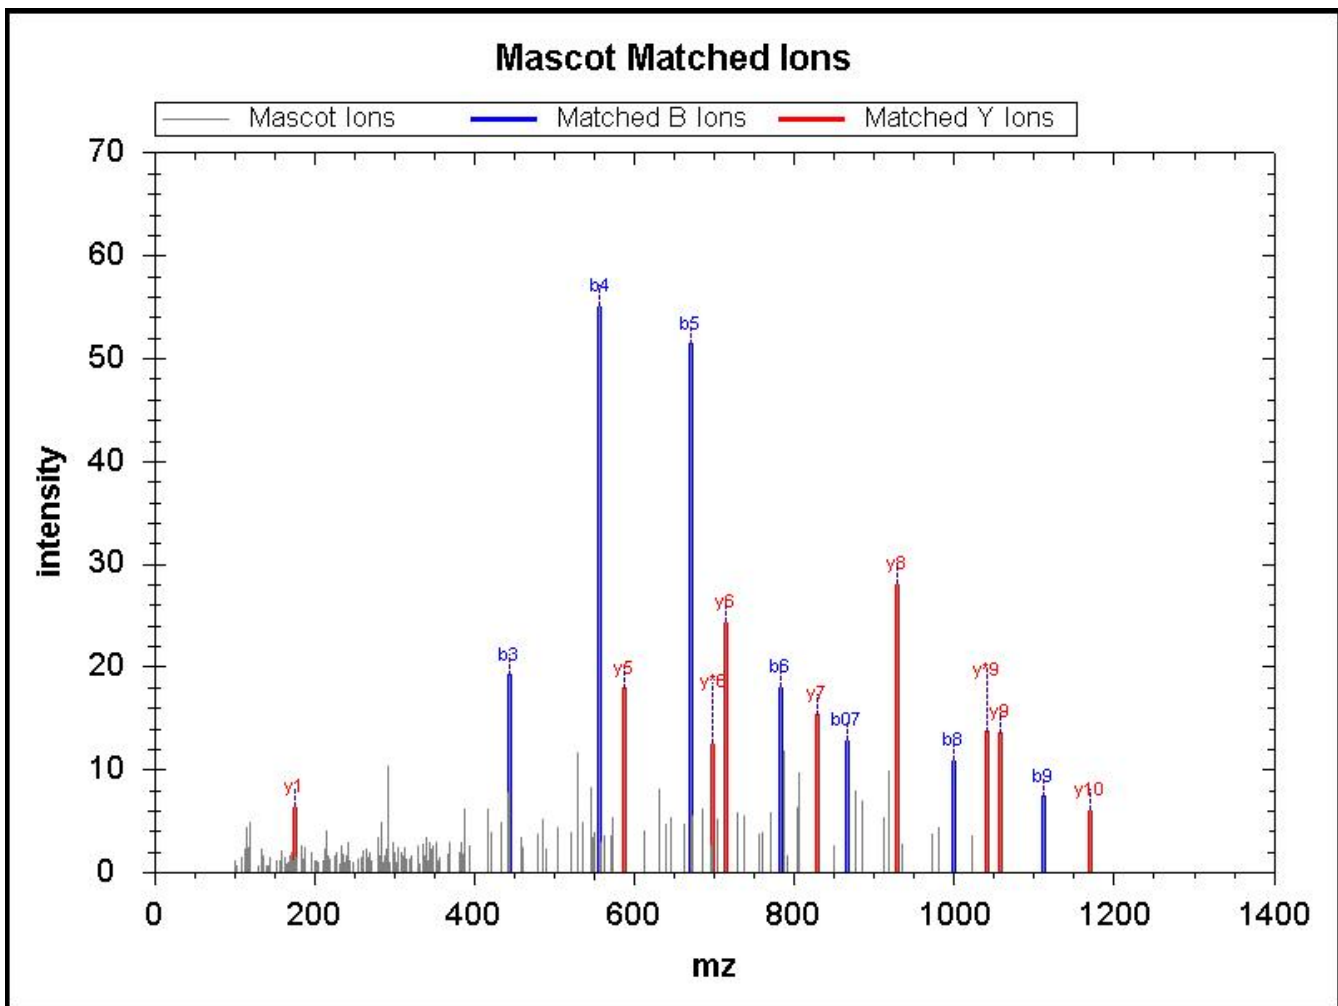

| No | b      | b++    | b*     | b*++   | b0 | b0++ | Seq | y        | y++    | y*       | y*++   | y0       | y0++   | RevNo |
|----|--------|--------|--------|--------|----|------|-----|----------|--------|----------|--------|----------|--------|-------|
| 1  | 202.13 | 101.57 |        |        |    |      | G   |          |        |          |        |          |        | 18    |
| 2  | 330.19 | 165.60 | 313.16 | 157.09 |    |      | Q   | 1,967.13 | 984.07 | 1,950.10 | 975.55 | 1,949.12 | 975.06 | 17    |
| 3  | 444.23 | 222.62 | 427.21 | 214.11 |    |      | N   | 1,839.07 | 920.04 | 1,822.04 | 911.53 | 1,821.06 | 911.03 | 16    |
| 4  | 557.32 | 279.16 | 540.29 | 270.65 |    |      | L   | 1,725.03 | 863.02 | 1,708.00 | 854.50 | 1,707.02 | 854.01 | 15    |
| 5  | 670.40 | 335.70 | 653.37 | 327.19 |    |      | L   | 1,611.94 | 806.48 | 1,594.92 | 797.96 | 1,593.93 | 797.47 | 14    |

|    |          |        |          |        |          |        |   |          |        |          |        |          |        |    |
|----|----------|--------|----------|--------|----------|--------|---|----------|--------|----------|--------|----------|--------|----|
| 6  | 783.48   | 392.25 | 766.46   | 383.73 |          |        | L | 1,498.86 | 749.93 | 1,481.83 | 741.42 | 1,480.85 | 740.93 | 13 |
| 7  | 884.53   | 442.77 | 867.51   | 434.26 | 866.52   | 433.76 | T | 1,385.77 | 693.39 | 1,368.75 | 684.88 | 1,367.76 | 684.39 | 12 |
| 8  | 998.58   | 499.79 | 981.55   | 491.28 | 980.56   | 490.79 | N | 1,284.73 | 642.87 | 1,267.70 | 634.35 | 1,266.72 | 633.86 | 11 |
| 9  | 1,111.66 | 556.33 | 1,094.63 | 547.82 | 1,093.65 | 547.33 | L | 1,170.68 | 585.85 | 1,153.66 | 577.33 | 1,152.67 | 576.84 | 10 |
| 10 | 1,239.72 | 620.36 | 1,222.69 | 611.85 | 1,221.71 | 611.36 | Q | 1,057.60 | 529.30 | 1,040.57 | 520.79 | 1,039.59 | 520.30 | 9  |
| 11 | 1,340.77 | 670.89 | 1,323.74 | 662.37 | 1,322.75 | 661.88 | T | 929.54   | 465.27 | 912.51   | 456.76 | 911.53   | 456.27 | 8  |
| 12 | 1,453.85 | 727.43 | 1,436.82 | 718.92 | 1,435.84 | 718.42 | I | 828.49   | 414.75 | 811.47   | 406.24 | 810.48   | 405.75 | 7  |
| 13 | 1,581.91 | 791.46 | 1,564.88 | 782.94 | 1,563.90 | 782.45 | Q | 715.41   | 358.21 | 698.38   | 349.70 | 697.40   | 349.20 | 6  |
| 14 | 1,638.93 | 819.97 | 1,621.90 | 811.46 | 1,620.92 | 810.96 | G | 587.35   | 294.18 | 570.32   | 285.67 | 569.34   | 285.17 | 5  |
| 15 | 1,752.01 | 876.51 | 1,734.99 | 868.00 | 1,734.00 | 867.51 | I | 530.33   | 265.67 | 513.30   | 257.16 | 512.32   | 256.66 | 4  |
| 16 | 1,865.10 | 933.05 | 1,848.07 | 924.54 | 1,847.09 | 924.05 | L | 417.25   | 209.13 | 400.22   | 200.61 | 399.24   | 200.12 | 3  |
| 17 | 1,994.14 | 997.57 | 1,977.11 | 989.06 | 1,976.13 | 988.57 | E | 304.16   | 152.58 | 287.13   | 144.07 | 286.15   | 143.58 | 2  |
| 18 |          |        |          |        |          |        | R | 175.12   | 88.06  | 158.09   | 79.55  |          |        | 1  |

Query 2140 Hit 1

MS/MS Fragmentation of **LQNIFLGLVNIIEEK**

Found in **sp|O15042|SR140\_HUMAN**, U2 snRNP-associated SURP motif-containing protein OS=Homo sapiens GN=U2SURP PE=1 SV=2

Match to Query 2140: 2030.205from(677.7423,3+)

Title: 1314: Scan 3347 (rt=83.4054, f=3, i=478) [D:\lab212\membrane\Grace\20120305-iTRAQ-1.raw]

Data File:

**Monoisotopic mass of neutral peptide Mr(calc): 2030.205**

**Variable modifications:**

**K15** iTRAQ4plex (K)

**Ions Score: 59.09 Expect: 0.000**

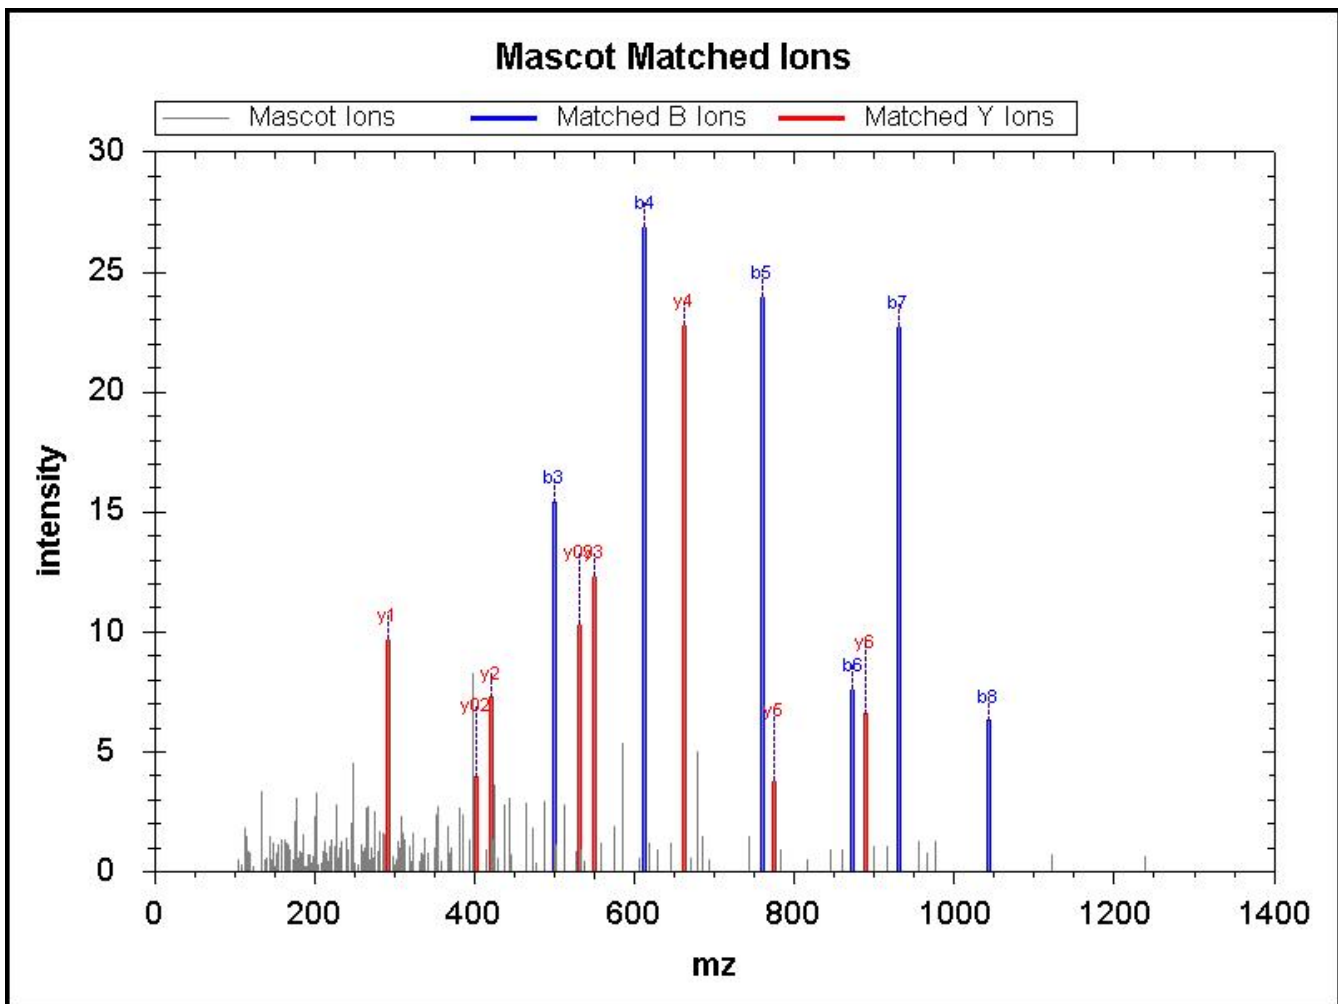

| No | b | b++ | b* | b*++ | b0 | b0++ | Seq | y | y++ | y* | y*++ | y0 | y0++ | RevNo |
|----|---|-----|----|------|----|------|-----|---|-----|----|------|----|------|-------|
|----|---|-----|----|------|----|------|-----|---|-----|----|------|----|------|-------|

|    |          |        |          |        |          |        |   |          |        |          |        |          |        |    |
|----|----------|--------|----------|--------|----------|--------|---|----------|--------|----------|--------|----------|--------|----|
| 1  | 258.19   | 129.60 |          |        |          |        | L |          |        |          |        |          |        | 15 |
| 2  | 386.25   | 193.63 | 369.23   | 185.12 |          |        | Q | 1,774.02 | 887.52 | 1,757.00 | 879.00 | 1,756.01 | 878.51 | 14 |
| 3  | 500.29   | 250.65 | 483.27   | 242.14 |          |        | N | 1,645.96 | 823.49 | 1,628.94 | 814.97 | 1,627.95 | 814.48 | 13 |
| 4  | 613.38   | 307.19 | 596.35   | 298.68 |          |        | I | 1,531.92 | 766.46 | 1,514.90 | 757.95 | 1,513.91 | 757.46 | 12 |
| 5  | 760.45   | 380.73 | 743.42   | 372.21 |          |        | F | 1,418.84 | 709.92 | 1,401.81 | 701.41 | 1,400.83 | 700.92 | 11 |
| 6  | 873.53   | 437.27 | 856.50   | 428.76 |          |        | L | 1,271.77 | 636.39 | 1,254.74 | 627.88 | 1,253.76 | 627.38 | 10 |
| 7  | 930.55   | 465.78 | 913.53   | 457.27 |          |        | G | 1,158.69 | 579.85 | 1,141.66 | 571.33 | 1,140.67 | 570.84 | 9  |
| 8  | 1,043.64 | 522.32 | 1,026.61 | 513.81 |          |        | L | 1,101.66 | 551.34 | 1,084.64 | 542.82 | 1,083.65 | 542.33 | 8  |
| 9  | 1,142.71 | 571.86 | 1,125.68 | 563.34 |          |        | V | 988.58   | 494.79 | 971.55   | 486.28 | 970.57   | 485.79 | 7  |
| 10 | 1,256.75 | 628.88 | 1,239.72 | 620.36 |          |        | N | 889.51   | 445.26 | 872.48   | 436.75 | 871.50   | 436.25 | 6  |
| 11 | 1,369.83 | 685.42 | 1,352.81 | 676.91 |          |        | I | 775.47   | 388.24 | 758.44   | 379.72 | 757.46   | 379.23 | 5  |
| 12 | 1,482.92 | 741.96 | 1,465.89 | 733.45 |          |        | I | 662.38   | 331.70 | 645.36   | 323.18 | 644.37   | 322.69 | 4  |
| 13 | 1,611.96 | 806.48 | 1,594.93 | 797.97 | 1,593.95 | 797.48 | E | 549.30   | 275.15 | 532.27   | 266.64 | 531.29   | 266.15 | 3  |
| 14 | 1,741.00 | 871.00 | 1,723.98 | 862.49 | 1,722.99 | 862.00 | E | 420.26   | 210.63 | 403.23   | 202.12 | 402.25   | 201.63 | 2  |
| 15 |          |        |          |        |          |        | K | 291.21   | 146.11 | 274.19   | 137.60 |          |        | 1  |

Query 2079 Hit 1

MS/MS Fragmentation of **LLFEYLTFLGIDDK**

Found in **sp|P12081|SYHC\_HUMAN**, Histidine--tRNA ligase

Match to Query 2079: 1974.111 from (659.0444,3+)

Title: 1260: Sum of 2 scans in range 3206 (rt=80.2292, f=4, i=892) to 3207 (rt=80.2546, f=4, i=893)

[D:\lab212\membrane\Grace\20120305-iTRAQ-1.raw]

Data File:

**Monoisotopic mass of neutral peptide Mr(calc):** 1974.111

**Variable modifications:**

**K14** iTRAQ4plex (K)

**Ions Score:** 58.97 **Expect:** 0.001

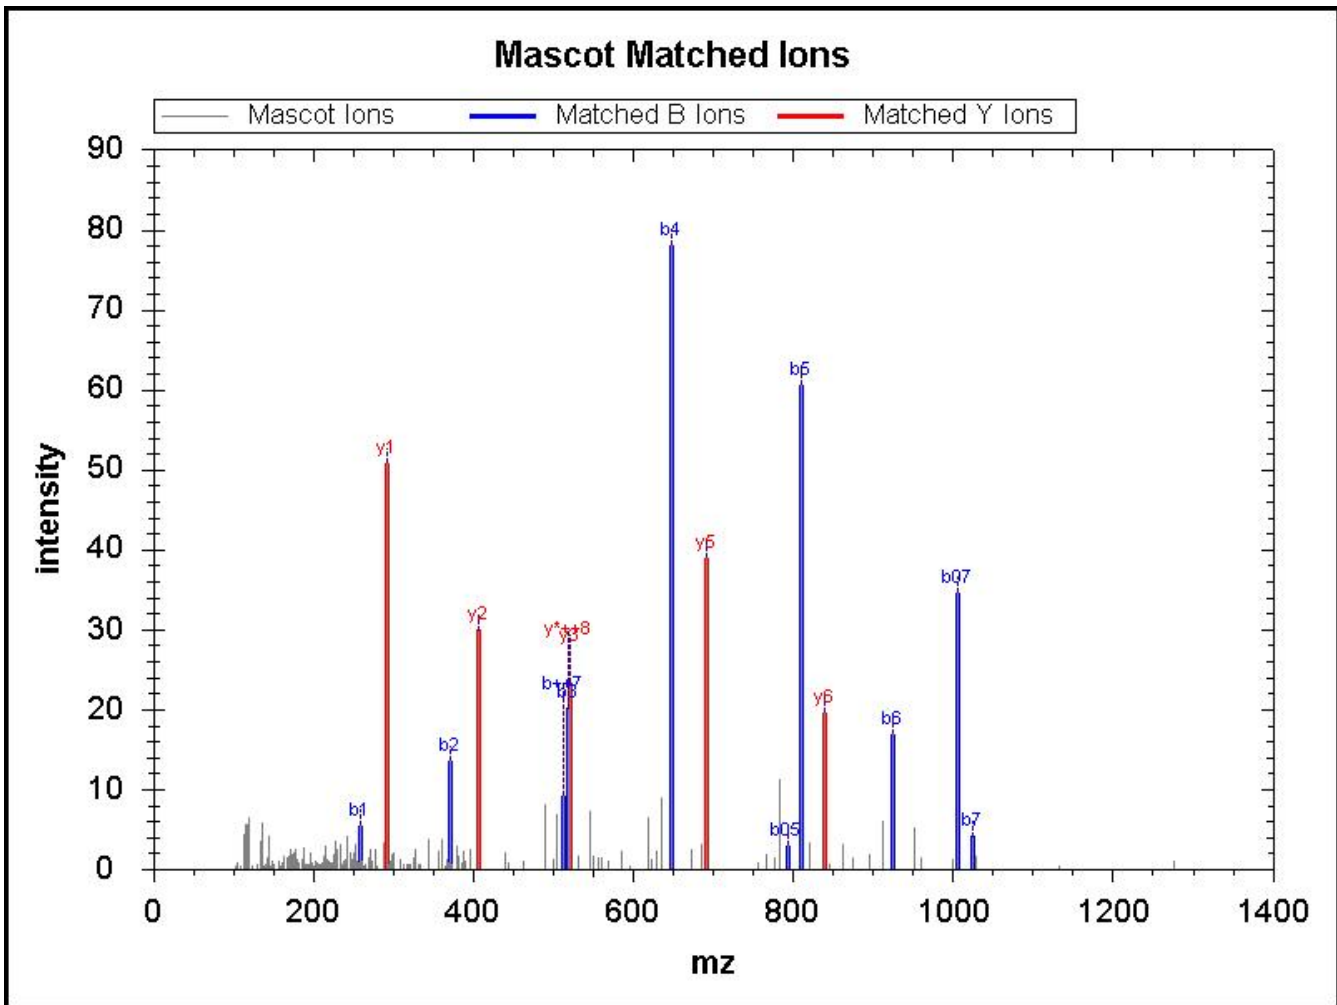

| No | b               | b++           | b0              | b0++   | Seq | y             | y++    | y*       | y*++          | y0       | y0++   | RevNo |
|----|-----------------|---------------|-----------------|--------|-----|---------------|--------|----------|---------------|----------|--------|-------|
| 1  | <b>258.19</b>   | 129.60        |                 |        | L   |               |        |          |               |          |        | 14    |
| 2  | <b>371.28</b>   | 186.14        |                 |        | L   | 1,717.92      | 859.46 | 1,700.89 | 850.95        | 1,699.91 | 850.46 | 13    |
| 3  | <b>518.35</b>   | 259.68        |                 |        | F   | 1,604.83      | 802.92 | 1,587.81 | 794.41        | 1,586.82 | 793.91 | 12    |
| 4  | <b>647.39</b>   | 324.20        | 629.38          | 315.19 | E   | 1,457.76      | 729.39 | 1,440.74 | 720.87        | 1,439.75 | 720.38 | 11    |
| 5  | <b>810.45</b>   | 405.73        | <b>792.44</b>   | 396.72 | Y   | 1,328.72      | 664.86 | 1,311.70 | 656.35        | 1,310.71 | 655.86 | 10    |
| 6  | <b>923.54</b>   | 462.27        | 905.53          | 453.27 | L   | 1,165.66      | 583.33 | 1,148.63 | 574.82        | 1,147.65 | 574.33 | 9     |
| 7  | <b>1,024.58</b> | <b>512.80</b> | <b>1,006.57</b> | 503.79 | T   | 1,052.57      | 526.79 | 1,035.55 | <b>518.28</b> | 1,034.56 | 517.79 | 8     |
| 8  | 1,137.67        | 569.34        | 1,119.66        | 560.33 | L   | 951.53        | 476.27 | 934.50   | 467.75        | 933.52   | 467.26 | 7     |
| 9  | 1,284.74        | 642.87        | 1,266.73        | 633.87 | F   | <b>838.44</b> | 419.72 | 821.42   | 411.21        | 820.43   | 410.72 | 6     |
| 10 | 1,341.76        | 671.38        | 1,323.75        | 662.38 | G   | <b>691.37</b> | 346.19 | 674.35   | 337.68        | 673.36   | 337.19 | 5     |
| 11 | 1,454.84        | 727.92        | 1,436.83        | 718.92 | I   | 634.35        | 317.68 | 617.33   | 309.17        | 616.34   | 308.67 | 4     |
| 12 | 1,569.87        | 785.44        | 1,551.86        | 776.43 | D   | <b>521.27</b> | 261.14 | 504.24   | 252.62        | 503.26   | 252.13 | 3     |
| 13 | 1,684.90        | 842.95        | 1,666.89        | 833.95 | D   | <b>406.24</b> | 203.62 | 389.22   | 195.11        | 388.23   | 194.62 | 2     |
| 14 |                 |               |                 |        | K   | <b>291.21</b> | 146.11 | 274.19   | 137.60        |          |        | 1     |

Query 2823 Hit 1

MS/MS Fragmentation of **LGDPAEY~~A~~HLVQAIENPFLNGEVIR**

Found in **sp|Q99714|HCD2\_HUMAN**, 3-hydroxyacyl-CoA dehydrogenase type-2 OS=Homo sapiens GN=HSD17B10 PE=1 SV=3

Match to Query 2823: 3021.615from(756.4109,4+)

Title: 1243: Sum of 2 scans in range 3169 (rt=79.3949, f=4, i=880) to 3170 (rt=79.4203, f=4, i=881)

[D:\lab212\membrane\Grace\20120305-iTRAQ-1.raw]

Data File:

**Monoisotopic mass of neutral peptide Mr(calc): 3021.615**

**Variable modifications:**

**Ions Score: 55.42 Expect: 0.002**

### Mascot Matched Ions

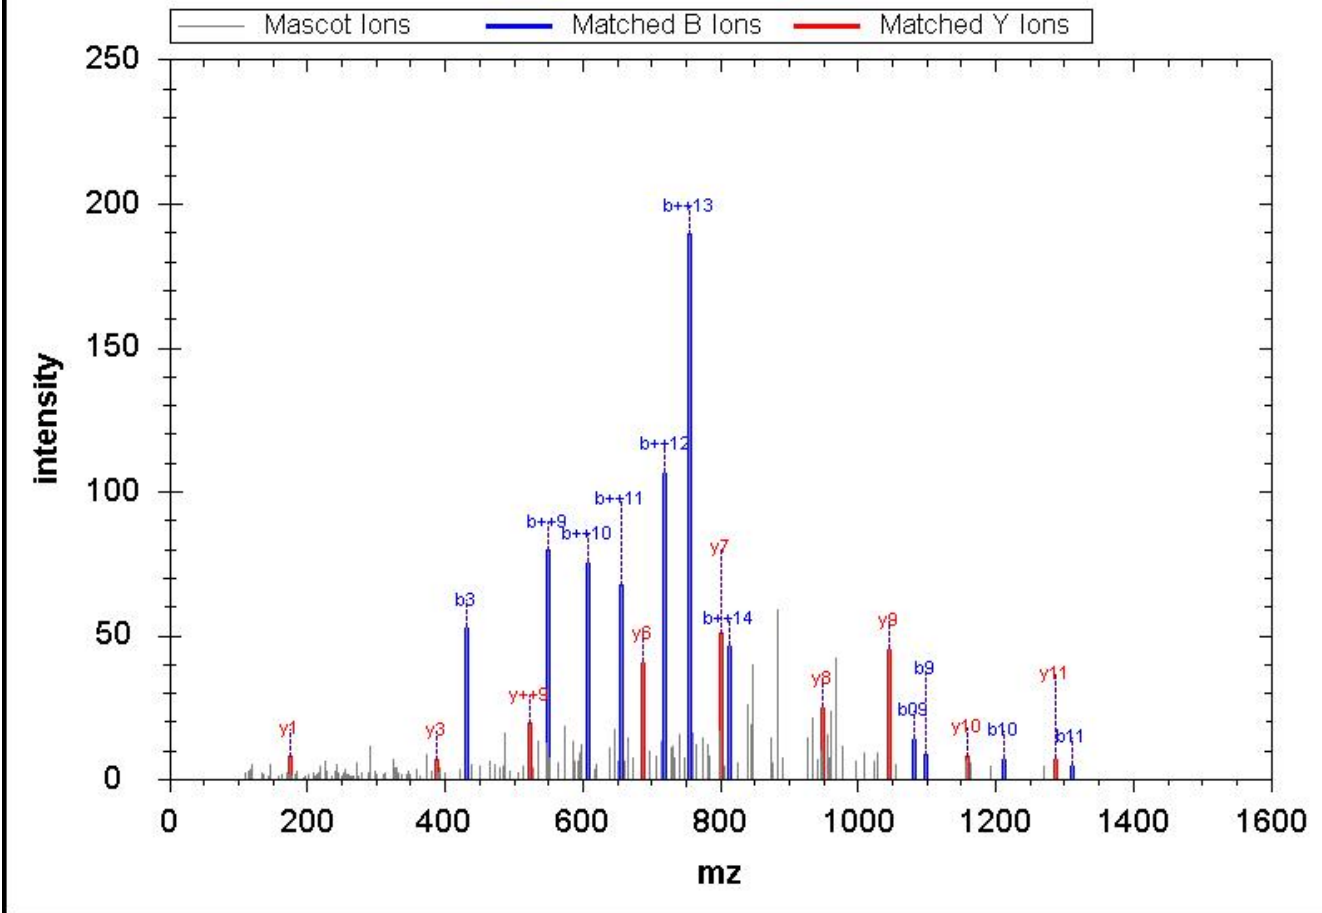

| No | b               | b++           | b*       | b*++     | b0              | b0++     | Seq | y               | y++           | y*       | y*++     | y0       | y0++     | RevNo |
|----|-----------------|---------------|----------|----------|-----------------|----------|-----|-----------------|---------------|----------|----------|----------|----------|-------|
| 1  | 258.19          | 129.60        |          |          |                 |          | L   |                 |               |          |          |          |          | 26    |
| 2  | 315.21          | 158.11        |          |          |                 |          | G   | 2,765.43        | 1,383.22      | 2,748.40 | 1,374.70 | 2,747.42 | 1,374.21 | 25    |
| 3  | <b>430.24</b>   | 215.62        |          |          | 412.23          | 206.62   | D   | 2,708.40        | 1,354.71      | 2,691.38 | 1,346.19 | 2,690.39 | 1,345.70 | 24    |
| 4  | 527.29          | 264.15        |          |          | 509.28          | 255.15   | P   | 2,593.38        | 1,297.19      | 2,576.35 | 1,288.68 | 2,575.37 | 1,288.19 | 23    |
| 5  | 598.33          | 299.67        |          |          | 580.32          | 290.66   | A   | 2,496.32        | 1,248.67      | 2,479.30 | 1,240.15 | 2,478.31 | 1,239.66 | 22    |
| 6  | 727.37          | 364.19        |          |          | 709.36          | 355.19   | E   | 2,425.29        | 1,213.15      | 2,408.26 | 1,204.63 | 2,407.28 | 1,204.14 | 21    |
| 7  | 890.44          | 445.72        |          |          | 872.43          | 436.72   | Y   | 2,296.24        | 1,148.63      | 2,279.22 | 1,140.11 | 2,278.23 | 1,139.62 | 20    |
| 8  | 961.47          | 481.24        |          |          | 943.46          | 472.24   | A   | 2,133.18        | 1,067.09      | 2,116.16 | 1,058.58 | 2,115.17 | 1,058.09 | 19    |
| 9  | <b>1,098.53</b> | <b>549.77</b> |          |          | <b>1,080.52</b> | 540.77   | H   | 2,062.14        | 1,031.58      | 2,045.12 | 1,023.06 | 2,044.13 | 1,022.57 | 18    |
| 10 | <b>1,211.62</b> | <b>606.31</b> |          |          | 1,193.61        | 597.31   | L   | 1,925.09        | 963.05        | 1,908.06 | 954.53   | 1,907.07 | 954.04   | 17    |
| 11 | <b>1,310.69</b> | <b>655.85</b> |          |          | 1,292.68        | 646.84   | V   | 1,812.00        | 906.50        | 1,794.97 | 897.99   | 1,793.99 | 897.50   | 16    |
| 12 | 1,438.74        | <b>719.88</b> | 1,421.72 | 711.36   | 1,420.73        | 710.87   | Q   | 1,712.93        | 856.97        | 1,695.91 | 848.46   | 1,694.92 | 847.96   | 15    |
| 13 | 1,509.78        | <b>755.39</b> | 1,492.76 | 746.88   | 1,491.77        | 746.39   | A   | 1,584.87        | 792.94        | 1,567.85 | 784.43   | 1,566.86 | 783.94   | 14    |
| 14 | 1,622.87        | <b>811.94</b> | 1,605.84 | 803.42   | 1,604.86        | 802.93   | I   | 1,513.84        | 757.42        | 1,496.81 | 748.91   | 1,495.83 | 748.42   | 13    |
| 15 | 1,735.95        | 868.48        | 1,718.92 | 859.97   | 1,717.94        | 859.47   | I   | 1,400.75        | 700.88        | 1,383.73 | 692.37   | 1,382.74 | 691.88   | 12    |
| 16 | 1,864.99        | 933.00        | 1,847.97 | 924.49   | 1,846.98        | 923.99   | E   | <b>1,287.67</b> | 644.34        | 1,270.64 | 635.83   | 1,269.66 | 635.33   | 11    |
| 17 | 1,979.04        | 990.02        | 1,962.01 | 981.51   | 1,961.03        | 981.02   | N   | <b>1,158.63</b> | 579.82        | 1,141.60 | 571.30   | 1,140.62 | 570.81   | 10    |
| 18 | 2,076.09        | 1,038.55      | 2,059.06 | 1,030.03 | 2,058.08        | 1,029.54 | P   | <b>1,044.58</b> | <b>522.80</b> | 1,027.56 | 514.28   | 1,026.57 | 513.79   | 9     |
| 19 | 2,223.16        | 1,112.08      | 2,206.13 | 1,103.57 | 2,205.15        | 1,103.08 | F   | <b>947.53</b>   | 474.27        | 930.50   | 465.76   | 929.52   | 465.26   | 8     |
| 20 | 2,336.24        | 1,168.62      | 2,319.21 | 1,160.11 | 2,318.23        | 1,159.62 | L   | <b>800.46</b>   | 400.73        | 783.44   | 392.22   | 782.45   | 391.73   | 7     |
| 21 | 2,450.28        | 1,225.65      | 2,433.26 | 1,217.13 | 2,432.27        | 1,216.64 | N   | <b>687.38</b>   | 344.19        | 670.35   | 335.68   | 669.37   | 335.19   | 6     |
| 22 | 2,507.31        | 1,254.16      | 2,490.28 | 1,245.64 | 2,489.29        | 1,245.15 | G   | 573.34          | 287.17        | 556.31   | 278.66   | 555.32   | 278.17   | 5     |
| 23 | 2,636.35        | 1,318.68      | 2,619.32 | 1,310.16 | 2,618.34        | 1,309.67 | E   | 516.31          | 258.66        | 499.29   | 250.15   | 498.30   | 249.66   | 4     |

|    |          |          |          |          |          |          |   |        |        |        |        |  |  |   |
|----|----------|----------|----------|----------|----------|----------|---|--------|--------|--------|--------|--|--|---|
| 24 | 2,735.42 | 1,368.21 | 2,718.39 | 1,359.70 | 2,717.41 | 1,359.21 | V | 387.27 | 194.14 | 370.24 | 185.63 |  |  | 3 |
| 25 | 2,848.50 | 1,424.75 | 2,831.47 | 1,416.24 | 2,830.49 | 1,415.75 | I | 288.20 | 144.61 | 271.18 | 136.09 |  |  | 2 |
| 26 |          |          |          |          |          |          | R | 175.12 | 88.06  | 158.09 | 79.55  |  |  | 1 |

Query 1374 Hit 1

MS/MS Fragmentation of **SAEFLHMLK**

Found in **sp|P18621|RL17\_HUMAN**, 60S ribosomal protein L17 OS=Homo sapiens GN=RPL17 PE=1 SV=3

Match to Query 1374: 1475.849from(492.9569,3+)

Title: 751: Sum of 2 scans in range 2071 (rt=54.6555, f=4, i=526) to 2072 (rt=54.6809, f=4, i=527)

[D:\lab212\membrane\Grace\20120305-iTRAQ-1.raw]

Data File:

**Monoisotopic mass of neutral peptide Mr(calc): 1475.849**

**Variable modifications:**

**K10** iTRAQ4plex (K)

**Ions Score: 53.93 Expect: 0.003**

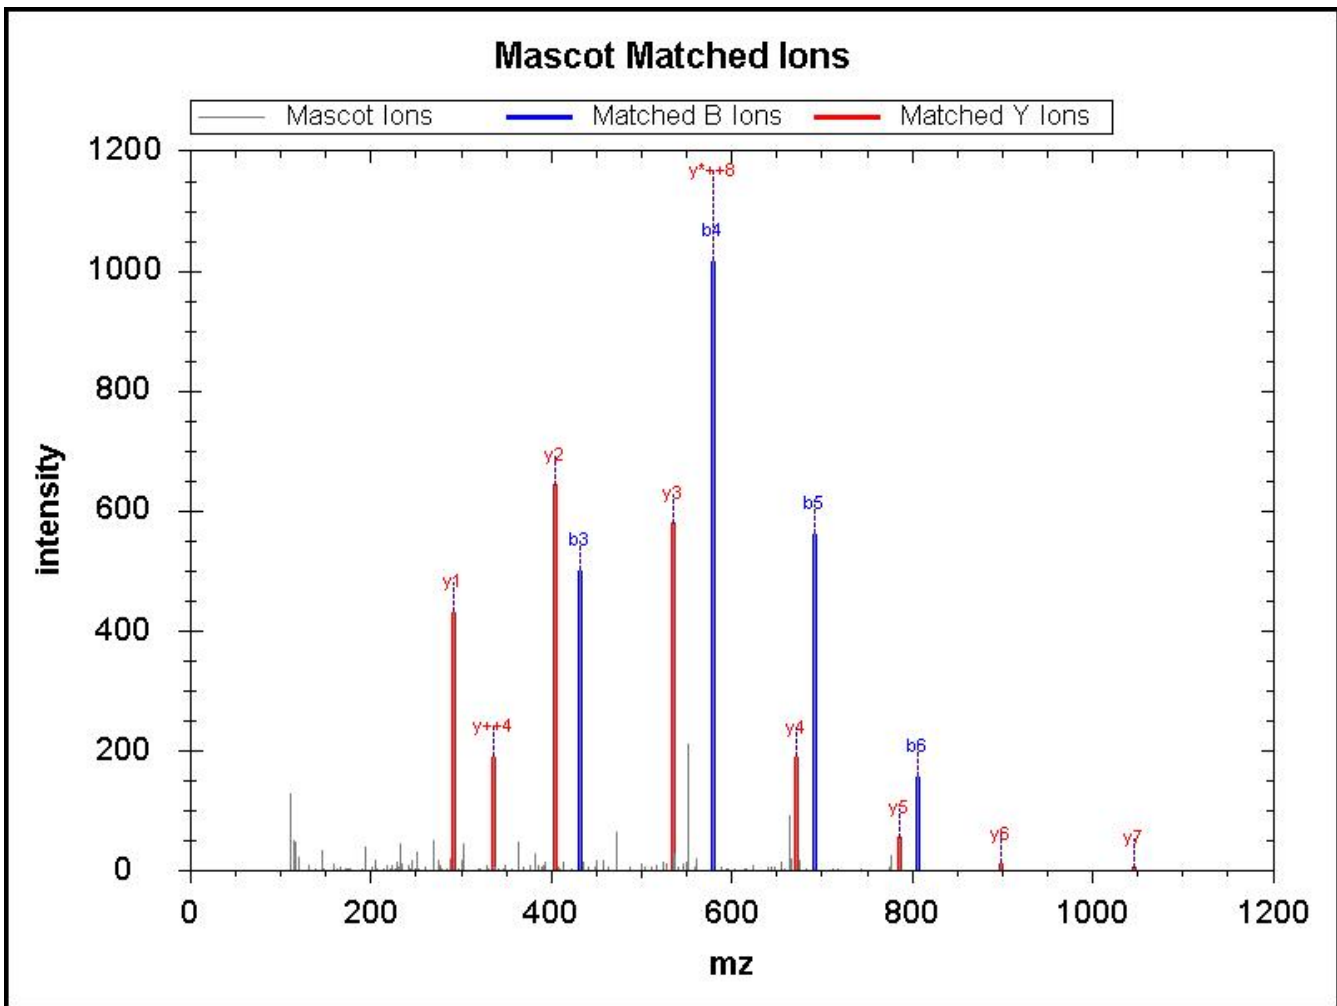

| No | b        | b++    | b0       | b0++   | Seq | y        | y++    | y*       | y*++   | y0       | y0++   | RevNo |
|----|----------|--------|----------|--------|-----|----------|--------|----------|--------|----------|--------|-------|
| 1  | 232.14   | 116.57 | 214.13   | 107.57 | S   |          |        |          |        |          |        | 10    |
| 2  | 303.18   | 152.09 | 285.17   | 143.09 | A   | 1,245.71 | 623.36 | 1,228.69 | 614.85 | 1,227.70 | 614.36 | 9     |
| 3  | 432.22   | 216.61 | 414.21   | 207.61 | E   | 1,174.68 | 587.84 | 1,157.65 | 579.33 | 1,156.67 | 578.84 | 8     |
| 4  | 579.29   | 290.15 | 561.28   | 281.14 | F   | 1,045.63 | 523.32 | 1,028.61 | 514.81 |          |        | 7     |
| 5  | 692.37   | 346.69 | 674.36   | 337.69 | L   | 898.57   | 449.79 | 881.54   | 441.27 |          |        | 6     |
| 6  | 805.46   | 403.23 | 787.45   | 394.23 | L   | 785.48   | 393.24 | 768.46   | 384.73 |          |        | 5     |
| 7  | 942.52   | 471.76 | 924.51   | 462.76 | H   | 672.40   | 336.70 | 655.37   | 328.19 |          |        | 4     |
| 8  | 1,073.56 | 537.28 | 1,055.55 | 528.28 | M   | 535.34   | 268.17 | 518.31   | 259.66 |          |        | 3     |
| 9  | 1,186.64 | 593.82 | 1,168.63 | 584.82 | L   | 404.30   | 202.65 | 387.27   | 194.14 |          |        | 2     |
| 10 |          |        |          |        | K   | 291.21   | 146.11 | 274.19   | 137.60 |          |        | 1     |

Query 1684 Hit 1

MS/MS Fragmentation of **GAYIYNALIEFIR**

Found in **sp|P26639|SYTC\_HUMAN**, Threonine--tRNA ligase

Match to Query 1684: 1685.935from(843.9747,2+)

Title: 1178: Sum of 2 scans in range 2860 (rt=72.8834, f=4, i=814) to 2861 (rt=72.9088, f=4, i=815)

[D:\lab212\membrane\Grace\20120305-iTRAQ-2.raw]

Data File:

**Monoisotopic mass of neutral peptide Mr(calc):** 1685.935

**Variable modifications:**

**Ions Score:** 53.57 **Expect:** 0.003

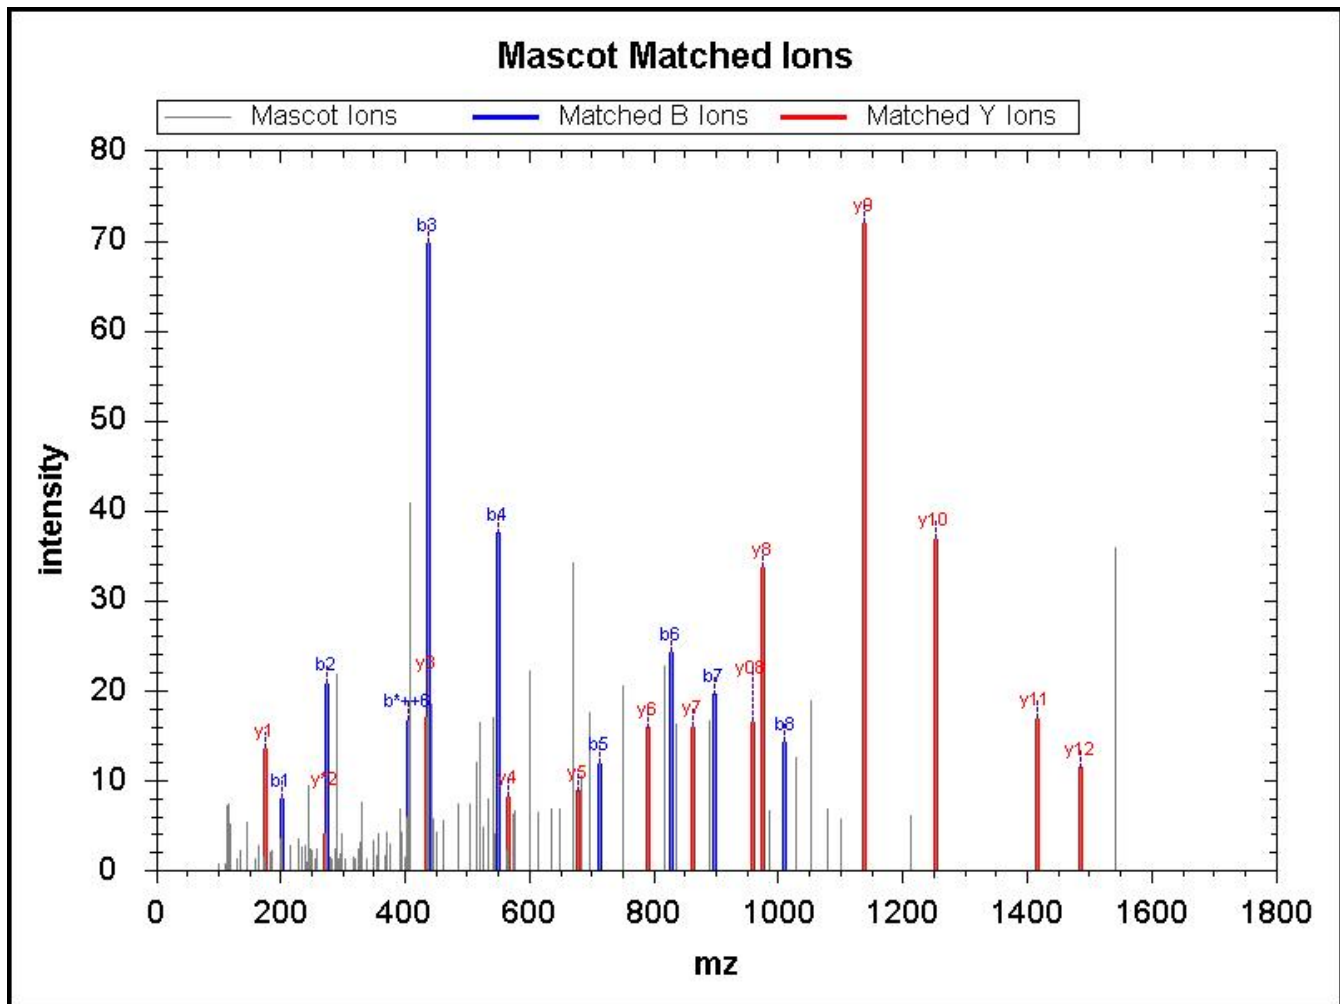

| No | b        | b++    | b*       | b*++   | b0       | b0++   | Seq | y        | y++    | y*       | y*++   | y0       | y0++   | RevNo |
|----|----------|--------|----------|--------|----------|--------|-----|----------|--------|----------|--------|----------|--------|-------|
| 1  | 202.13   | 101.57 |          |        |          |        | G   |          |        |          |        |          |        | 13    |
| 2  | 273.17   | 137.09 |          |        |          |        | A   | 1,485.81 | 743.41 | 1,468.78 | 734.90 | 1,467.80 | 734.40 | 12    |
| 3  | 436.23   | 218.62 |          |        |          |        | Y   | 1,414.77 | 707.89 | 1,397.75 | 699.38 | 1,396.76 | 698.88 | 11    |
| 4  | 549.32   | 275.16 |          |        |          |        | I   | 1,251.71 | 626.36 | 1,234.68 | 617.85 | 1,233.70 | 617.35 | 10    |
| 5  | 712.38   | 356.69 |          |        |          |        | Y   | 1,138.63 | 569.82 | 1,121.60 | 561.30 | 1,120.61 | 560.81 | 9     |
| 6  | 826.42   | 413.71 | 809.39   | 405.20 |          |        | N   | 975.56   | 488.28 | 958.54   | 479.77 | 957.55   | 479.28 | 8     |
| 7  | 897.46   | 449.23 | 880.43   | 440.72 |          |        | A   | 861.52   | 431.26 | 844.49   | 422.75 | 843.51   | 422.26 | 7     |
| 8  | 1,010.54 | 505.77 | 993.52   | 497.26 |          |        | L   | 790.48   | 395.74 | 773.46   | 387.23 | 772.47   | 386.74 | 6     |
| 9  | 1,123.63 | 562.32 | 1,106.60 | 553.80 |          |        | I   | 677.40   | 339.20 | 660.37   | 330.69 | 659.39   | 330.20 | 5     |
| 10 | 1,252.67 | 626.84 | 1,235.64 | 618.33 | 1,234.66 | 617.83 | E   | 564.31   | 282.66 | 547.29   | 274.15 | 546.30   | 273.66 | 4     |
| 11 | 1,399.74 | 700.37 | 1,382.71 | 691.86 | 1,381.73 | 691.37 | F   | 435.27   | 218.14 | 418.24   | 209.63 |          |        | 3     |
| 12 | 1,512.82 | 756.91 | 1,495.80 | 748.40 | 1,494.81 | 747.91 | I   | 288.20   | 144.61 | 271.18   | 136.09 |          |        | 2     |
| 13 |          |        |          |        |          |        | R   | 175.12   | 88.06  | 158.09   | 79.55  |          |        | 1     |

Query 1308 Hit 1

MS/MS Fragmentation of **ILVTLHTLER**

Found in **sp|Q9BWD1|THIC\_HUMAN**, Acetyl-CoA acetyltransferase

Match to Query 1308: 1450.909from(484.6436,3+)

Title: 1018: Scan 2525 (rt=65.3297, f=3, i=356) [D:\lab212\membrane\Grace\20120305-iTRAQ-2.raw]

Data File:

**Monoisotopic mass of neutral peptide Mr(calc): 1450.909**

**Variable modifications:**

**Ions Score: 52.76 Expect: 0.001**

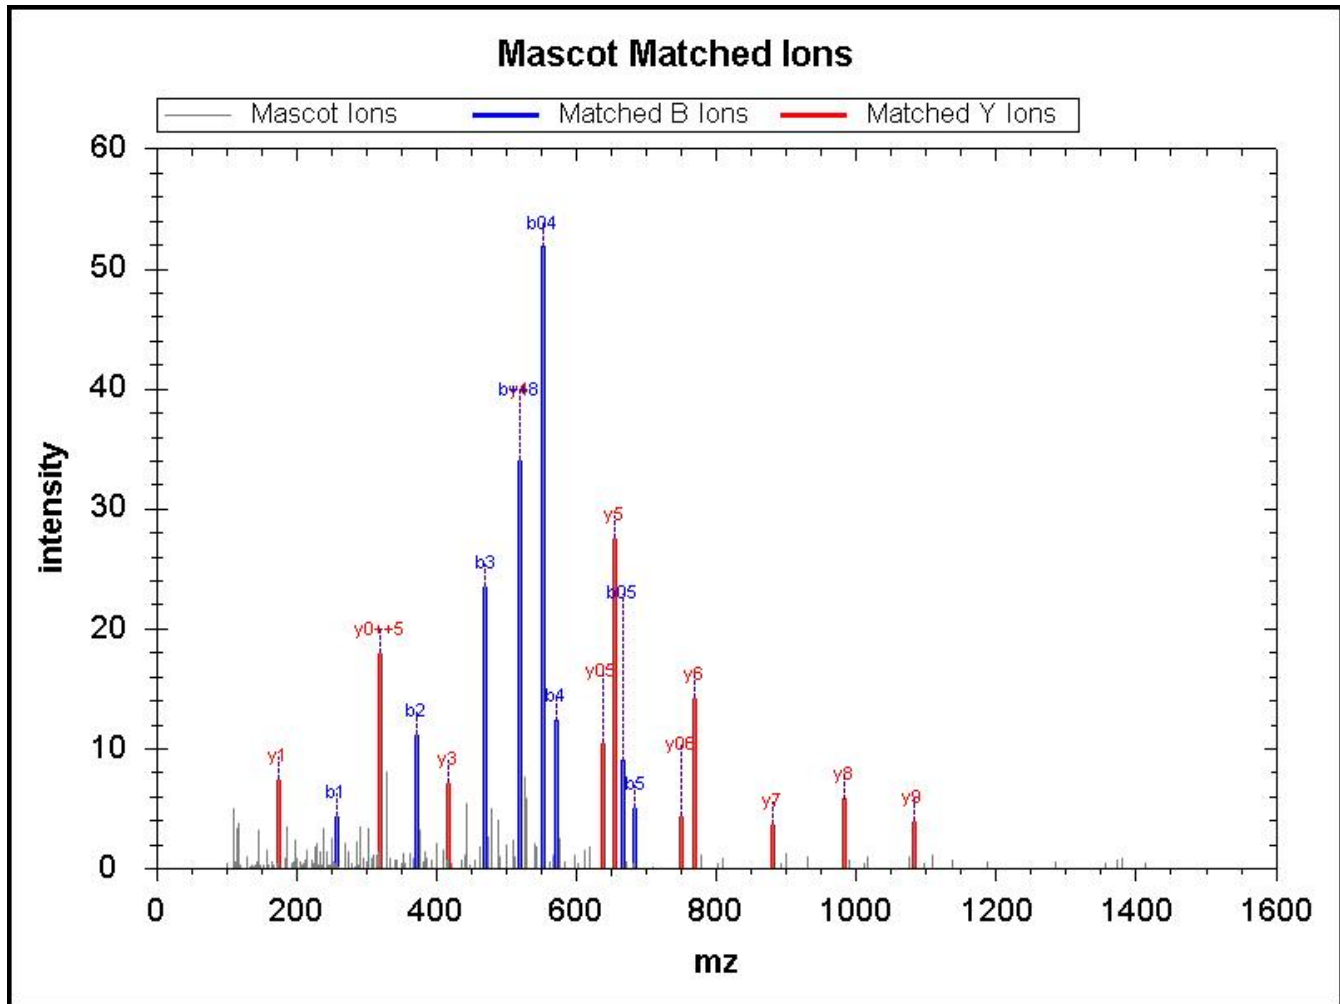

| No | b             | b++           | b0            | b0++   | Seq | y               | y++    | y*       | y*++   | y0            | y0++          | RevNo |
|----|---------------|---------------|---------------|--------|-----|-----------------|--------|----------|--------|---------------|---------------|-------|
| 1  | <b>258.19</b> | 129.60        |               |        | I   |                 |        |          |        |               |               | 11    |
| 2  | <b>371.28</b> | 186.14        |               |        | L   | 1,194.72        | 597.86 | 1,177.69 | 589.35 | 1,176.71      | 588.86        | 10    |
| 3  | <b>470.35</b> | 235.68        |               |        | V   | <b>1,081.64</b> | 541.32 | 1,064.61 | 532.81 | 1,063.63      | 532.32        | 9     |
| 4  | <b>571.39</b> | 286.20        | <b>553.38</b> | 277.20 | T   | <b>982.57</b>   | 491.79 | 965.54   | 483.27 | 964.56        | 482.78        | 8     |
| 5  | <b>684.48</b> | 342.74        | <b>666.47</b> | 333.74 | L   | <b>881.52</b>   | 441.26 | 864.49   | 432.75 | 863.51        | 432.26        | 7     |
| 6  | 797.56        | 399.28        | 779.55        | 390.28 | L   | <b>768.44</b>   | 384.72 | 751.41   | 376.21 | <b>750.43</b> | 375.72        | 6     |
| 7  | 934.62        | 467.81        | 916.61        | 458.81 | H   | <b>655.35</b>   | 328.18 | 638.33   | 319.67 | <b>637.34</b> | <b>319.17</b> | 5     |
| 8  | 1,035.67      | <b>518.34</b> | 1,017.66      | 509.33 | T   | <b>518.29</b>   | 259.65 | 501.27   | 251.14 | 500.28        | 250.64        | 4     |
| 9  | 1,148.75      | 574.88        | 1,130.74      | 565.87 | L   | <b>417.25</b>   | 209.13 | 400.22   | 200.61 | 399.24        | 200.12        | 3     |
| 10 | 1,277.80      | 639.40        | 1,259.78      | 630.40 | E   | 304.16          | 152.58 | 287.13   | 144.07 | 286.15        | 143.58        | 2     |
| 11 |               |               |               |        | R   | <b>175.12</b>   | 88.06  | 158.09   | 79.55  |               |               | 1     |

Query 1376 Hit 1

MS/MS Fragmentation of **VANVSLALYK**

Found in **sp|P62266|RS23\_HUMAN**, 40S ribosomal protein S23 OS=Homo sapiens GN=RPS23 PE=1 SV=3

Match to Query 1376: 1477.917from(739.9656,2+)



Title: 769: Sum of 2 scans in range 1980 (rt=53.0536, f=4, i=530) to 1981 (rt=53.079, f=4, i=531)  
 [D:\lab212\membrane\Grace\20120305-iTRAQ-2.raw]

Data File:

**Monoisotopic mass of neutral peptide Mr(calc): 1477.917**

**Variable modifications:**

**K11** iTRAQ4plex (K)

**Ions Score: 51.68 Expect: 0.002**

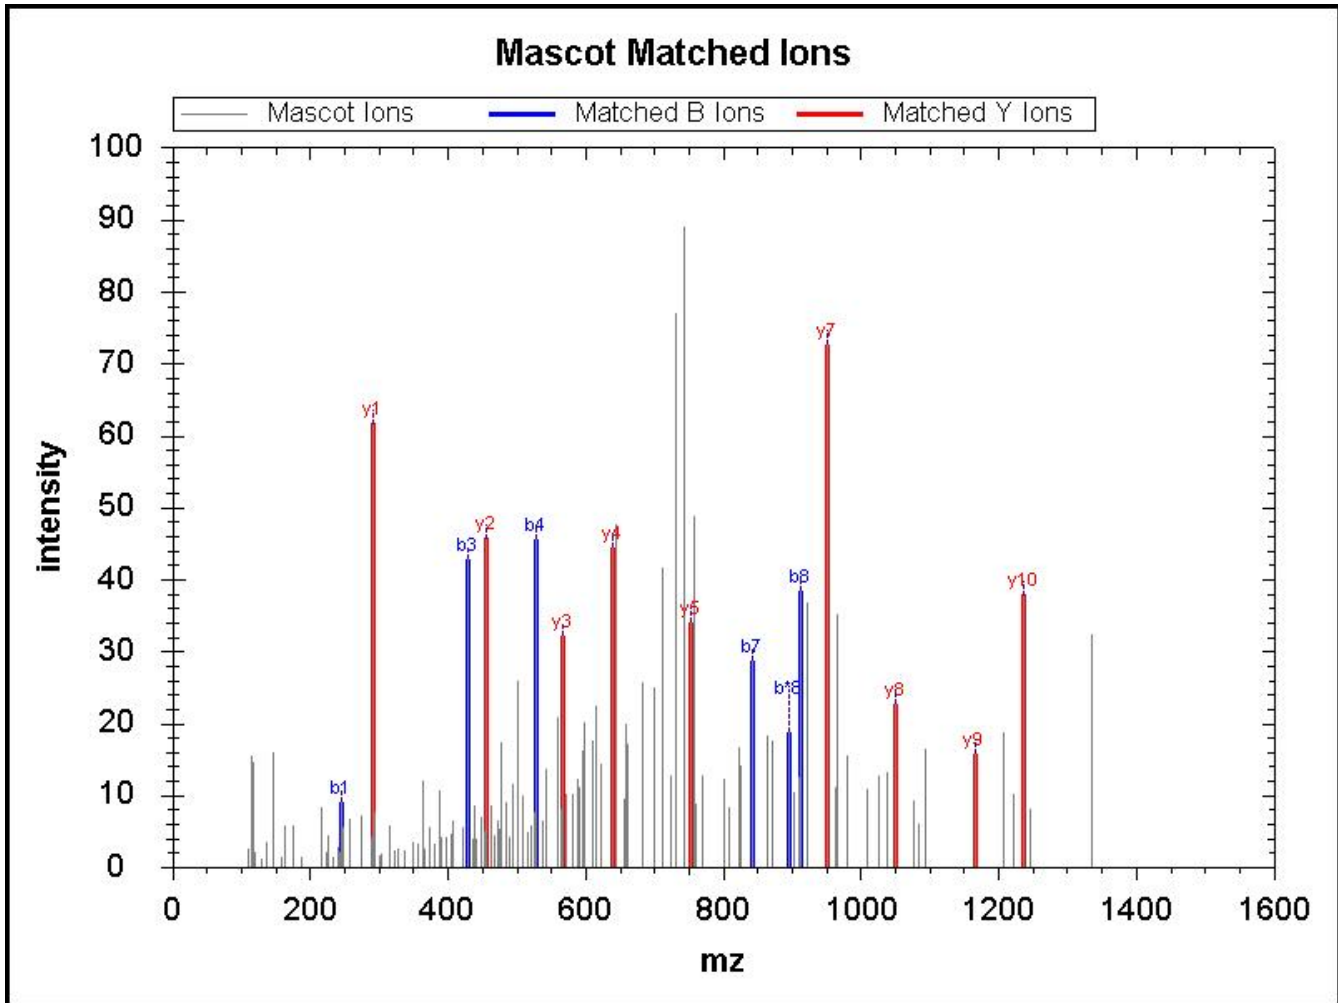

| No | b        | b++    | b*       | b*++   | b0       | b0++   | Seq | y        | y++    | y*       | y*++   | y0       | y0++   | RevNo |
|----|----------|--------|----------|--------|----------|--------|-----|----------|--------|----------|--------|----------|--------|-------|
| 1  | 244.18   | 122.59 |          |        |          |        | V   |          |        |          |        |          |        | 11    |
| 2  | 315.21   | 158.11 |          |        |          |        | A   | 1,235.75 | 618.38 | 1,218.72 | 609.86 | 1,217.74 | 609.37 | 10    |
| 3  | 429.26   | 215.13 | 412.23   | 206.62 |          |        | N   | 1,164.71 | 582.86 | 1,147.68 | 574.35 | 1,146.70 | 573.85 | 9     |
| 4  | 528.33   | 264.67 | 511.30   | 256.15 |          |        | V   | 1,050.67 | 525.84 | 1,033.64 | 517.32 | 1,032.66 | 516.83 | 8     |
| 5  | 615.36   | 308.18 | 598.33   | 299.67 | 597.35   | 299.18 | S   | 951.60   | 476.30 | 934.57   | 467.79 | 933.59   | 467.30 | 7     |
| 6  | 728.44   | 364.72 | 711.42   | 356.21 | 710.43   | 355.72 | L   | 864.57   | 432.79 | 847.54   | 424.27 |          |        | 6     |
| 7  | 841.53   | 421.27 | 824.50   | 412.75 | 823.52   | 412.26 | L   | 751.48   | 376.25 | 734.46   | 367.73 |          |        | 5     |
| 8  | 912.56   | 456.79 | 895.54   | 448.27 | 894.55   | 447.78 | A   | 638.40   | 319.70 | 621.37   | 311.19 |          |        | 4     |
| 9  | 1,025.65 | 513.33 | 1,008.62 | 504.81 | 1,007.64 | 504.32 | L   | 567.36   | 284.18 | 550.34   | 275.67 |          |        | 3     |
| 10 | 1,188.71 | 594.86 | 1,171.68 | 586.35 | 1,170.70 | 585.85 | Y   | 454.28   | 227.64 | 437.25   | 219.13 |          |        | 2     |
| 11 |          |        |          |        |          |        | K   | 291.21   | 146.11 | 274.19   | 137.60 |          |        | 1     |

Query 37 Hit 1

MS/MS Fragmentation of **GSINLKR**

Found in **sp|Q7Z5Q5|DPOLN\_HUMAN**, DNA polymerase nu OS=Homo sapiens GN=POLN PE=1 SV=2

Match to Query 37: 787.4729from(394.7437,2+)

Title: 323: Scan 1017 (rt=31.3488, f=2, i=139) [D:\lab212\membrane\Grace\20120305-iTRAQ-2.raw]

Data File:

**Monoisotopic mass of neutral peptide Mr(calc): 787.4729**

**Variable modifications:**

N4 :Deamidated (NQ)

Ions Score: 49.69 Expect: 0.007

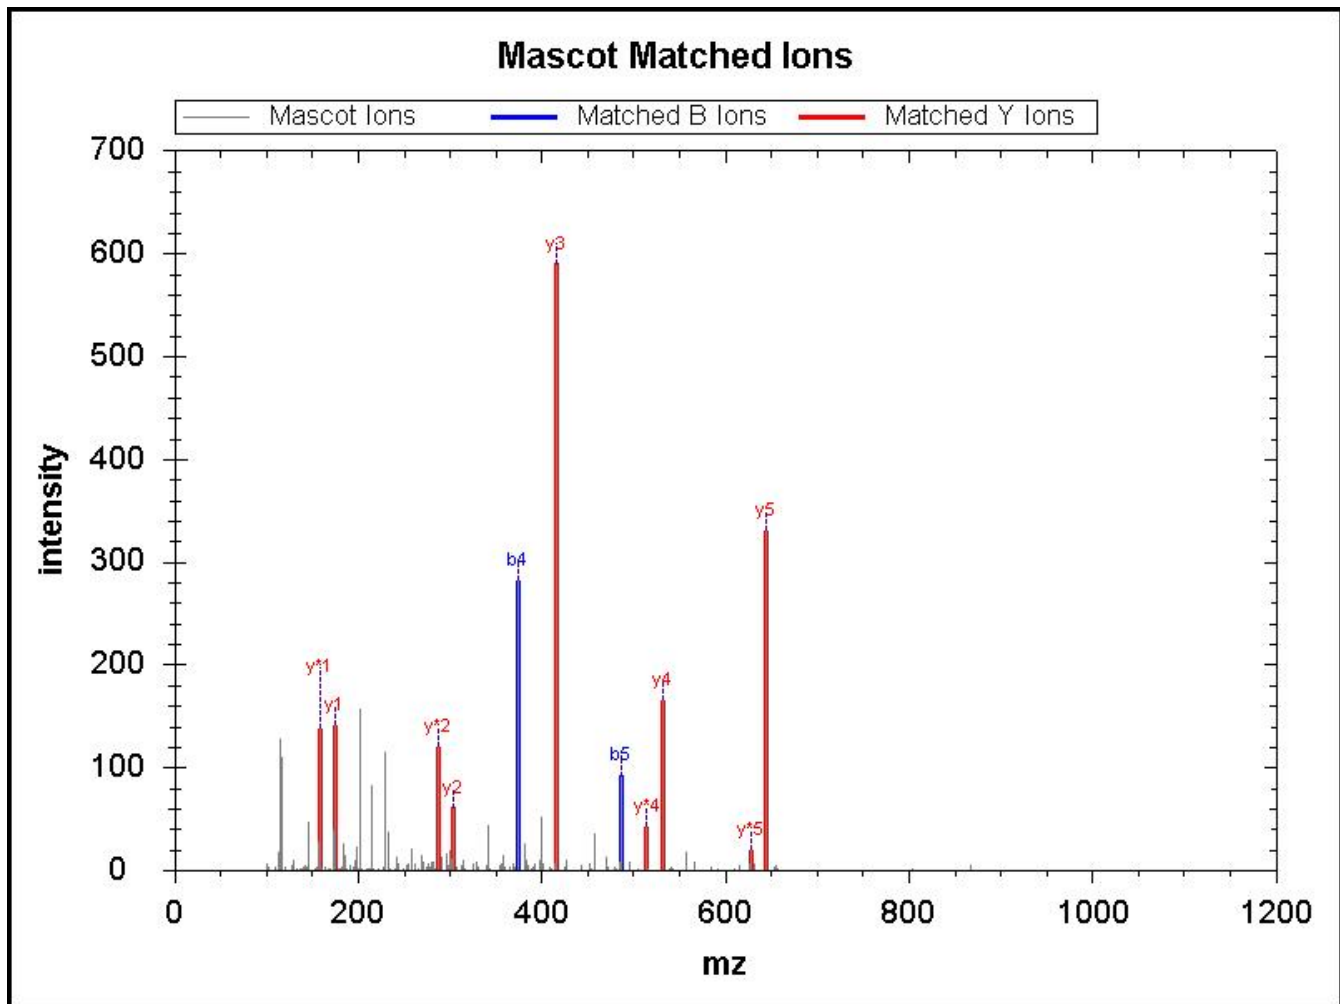

| No | b      | b++    | b*     | b*++   | b0     | b0++   | Seq | y      | y++    | y*     | y*++   | y0     | y0++   | RevNo |
|----|--------|--------|--------|--------|--------|--------|-----|--------|--------|--------|--------|--------|--------|-------|
| 1  | 58.03  | 29.52  |        |        |        |        | G   |        |        |        |        |        |        | 7     |
| 2  | 145.06 | 73.03  |        |        | 127.05 | 64.03  | S   | 731.44 | 366.22 | 714.41 | 357.71 | 713.43 | 357.22 | 6     |
| 3  | 258.14 | 129.58 |        |        | 240.13 | 120.57 | I   | 644.41 | 322.71 | 627.38 | 314.19 |        |        | 5     |
| 4  | 373.17 | 187.09 | 356.15 | 178.58 | 355.16 | 178.08 | N   | 531.32 | 266.17 | 514.30 | 257.65 |        |        | 4     |
| 5  | 486.26 | 243.63 | 469.23 | 235.12 | 468.25 | 234.63 | L   | 416.30 | 208.65 | 399.27 | 200.14 |        |        | 3     |
| 6  | 614.35 | 307.68 | 597.32 | 299.17 | 596.34 | 298.67 | K   | 303.21 | 152.11 | 286.19 | 143.60 |        |        | 2     |
| 7  |        |        |        |        |        |        | R   | 175.12 | 88.06  | 158.09 | 79.55  |        |        | 1     |

Query 2432 Hit 1

**MS/MS Fragmentation of FVDHVFDEQVIDSLTVK**

Found in **sp|P04843|RPN1\_HUMAN**, Dolichyl-diphosphooligosaccharide--protein glycosyltransferase subunit 1 OS=Homo sapiens GN=RPN1 PE=1 SV=1

Match to Query 2432: 2278.222from(760.4145,3+)

Title: 845: Sum of 2 scans in range 2141 (rt=56.6819, f=4, i=582) to 2142 (rt=56.7074, f=4, i=583)

[D:\lab212\membrane\Grace\20120305-iTRAQ-2.raw]

Data File:

**Monoisotopic mass of neutral peptide Mr(calc): 2278.222**

**Variable modifications:**

K17 iTRAQ4plex (K)

Ions Score: 49.17 Expect: 0.010

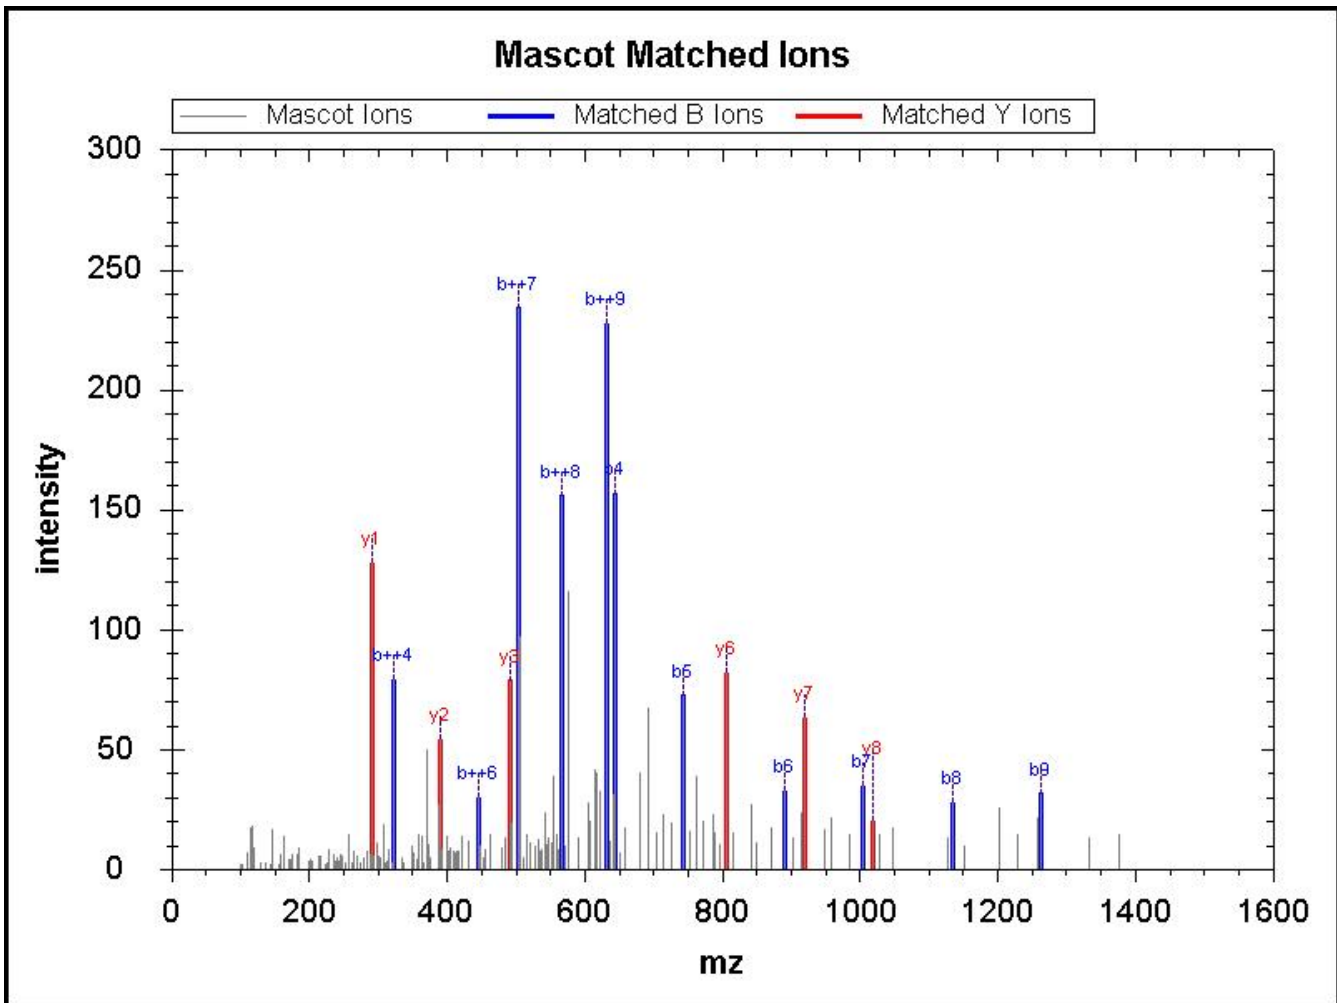

| No | b               | b <sup>++</sup> | b <sup>*</sup> | b <sup>*++</sup> | b <sup>0</sup> | b <sup>0++</sup> | Seq | y               | y <sup>++</sup> | y <sup>*</sup> | y <sup>*++</sup> | y <sup>0</sup> | y <sup>0++</sup> | RevNo |
|----|-----------------|-----------------|----------------|------------------|----------------|------------------|-----|-----------------|-----------------|----------------|------------------|----------------|------------------|-------|
| 1  | 292.18          | 146.59          |                |                  |                |                  | F   |                 |                 |                |                  |                |                  | 17    |
| 2  | 391.25          | 196.13          |                |                  |                |                  | V   | 1,988.05        | 994.53          | 1,971.02       | 986.01           | 1,970.04       | 985.52           | 16    |
| 3  | 506.27          | 253.64          |                |                  | 488.26         | 244.63           | D   | 1,888.98        | 944.99          | 1,871.95       | 936.48           | 1,870.97       | 935.99           | 15    |
| 4  | <b>643.33</b>   | <b>322.17</b>   |                |                  | 625.32         | 313.16           | H   | 1,773.95        | 887.48          | 1,756.92       | 878.97           | 1,755.94       | 878.47           | 14    |
| 5  | <b>742.40</b>   | 371.70          |                |                  | 724.39         | 362.70           | V   | 1,636.89        | 818.95          | 1,619.86       | 810.44           | 1,618.88       | 809.94           | 13    |
| 6  | <b>889.47</b>   | <b>445.24</b>   |                |                  | 871.46         | 436.23           | F   | 1,537.82        | 769.42          | 1,520.80       | 760.90           | 1,519.81       | 760.41           | 12    |
| 7  | <b>1,004.50</b> | <b>502.75</b>   |                |                  | 986.49         | 493.75           | D   | 1,390.75        | 695.88          | 1,373.73       | 687.37           | 1,372.74       | 686.88           | 11    |
| 8  | <b>1,133.54</b> | <b>567.27</b>   |                |                  | 1,115.53       | 558.27           | E   | 1,275.73        | 638.37          | 1,258.70       | 629.85           | 1,257.72       | 629.36           | 10    |
| 9  | <b>1,261.60</b> | <b>631.30</b>   | 1,244.57       | 622.79           | 1,243.59       | 622.30           | Q   | 1,146.68        | 573.85          | 1,129.66       | 565.33           | 1,128.67       | 564.84           | 9     |
| 10 | 1,360.67        | 680.84          | 1,343.64       | 672.32           | 1,342.65       | 671.83           | V   | <b>1,018.63</b> | 509.82          | 1,001.60       | 501.30           | 1,000.62       | 500.81           | 8     |
| 11 | 1,473.75        | 737.38          | 1,456.72       | 728.87           | 1,455.74       | 728.37           | I   | <b>919.56</b>   | 460.28          | 902.53         | 451.77           | 901.55         | 451.28           | 7     |
| 12 | 1,588.78        | 794.89          | 1,571.75       | 786.38           | 1,570.77       | 785.89           | D   | <b>806.47</b>   | 403.74          | 789.45         | 395.23           | 788.46         | 394.74           | 6     |
| 13 | 1,675.81        | 838.41          | 1,658.78       | 829.89           | 1,657.80       | 829.40           | S   | 691.45          | 346.23          | 674.42         | 337.71           | 673.44         | 337.22           | 5     |
| 14 | 1,788.89        | 894.95          | 1,771.87       | 886.44           | 1,770.88       | 885.94           | L   | 604.41          | 302.71          | 587.39         | 294.20           | 586.40         | 293.71           | 4     |
| 15 | 1,889.94        | 945.47          | 1,872.91       | 936.96           | 1,871.93       | 936.47           | T   | <b>491.33</b>   | 246.17          | 474.30         | 237.66           | 473.32         | 237.16           | 3     |
| 16 | 1,989.01        | 995.01          | 1,971.98       | 986.49           | 1,971.00       | 986.00           | V   | <b>390.28</b>   | 195.65          | 373.26         | 187.13           |                |                  | 2     |
| 17 |                 |                 |                |                  |                |                  | K   | <b>291.21</b>   | 146.11          | 274.19         | 137.60           |                |                  | 1     |

Query 2459 Hit 1

MS/MS Fragmentation of **DAEEVISQTIDTIVDMIK**

Found in **sp|Q04857|CO6A1\_MOUSE**, Collagen alpha-1(VI) chain OS=Mus musculus GN=Col6a1 PE=2 SV=1

Match to Query 2459: 2308.229from(770.4171,3+)

Title: 1398: Scan 3904 (rt=94.9306, f=2, i=603) [D:\lab212\membrane\Grace\20120305-iTRAQ-1.raw]

Data File:

**Monoisotopic mass of neutral peptide Mr(calc): 2308.229**

Variable modifications:  
 Q8 :Deamidated (NQ)  
 K18 :iTRAQ4plex (K)  
 Ions Score: 48.66 Expect: 0.011

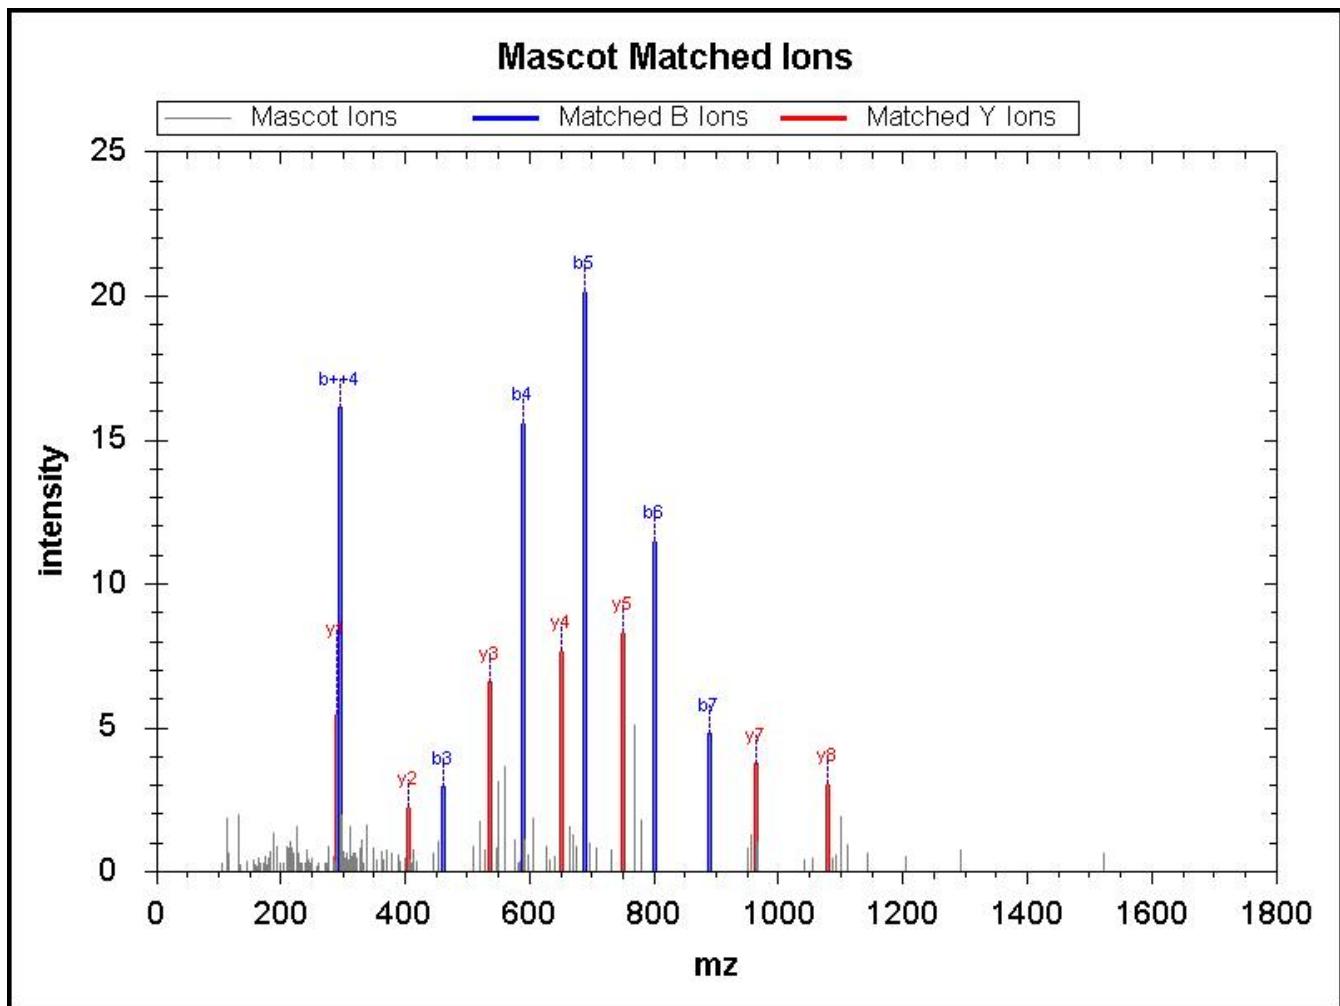

| No | b        | b++      | b*       | b*++     | b0       | b0++     | Seq | y        | y++      | y*       | y*++     | y0       | y0++     | RevNo |
|----|----------|----------|----------|----------|----------|----------|-----|----------|----------|----------|----------|----------|----------|-------|
| 1  | 260.14   | 130.57   |          |          | 242.13   | 121.57   | D   |          |          |          |          |          |          | 18    |
| 2  | 331.17   | 166.09   |          |          | 313.16   | 157.09   | A   | 2,050.07 | 1,025.54 | 2,033.05 | 1,017.03 | 2,032.06 | 1,016.54 | 17    |
| 3  | 460.22   | 230.61   |          |          | 442.21   | 221.61   | E   | 1,979.04 | 990.02   | 1,962.01 | 981.51   | 1,961.03 | 981.02   | 16    |
| 4  | 589.26   | 295.13   |          |          | 571.25   | 286.13   | E   | 1,849.99 | 925.50   | 1,832.97 | 916.99   | 1,831.98 | 916.50   | 15    |
| 5  | 688.33   | 344.67   |          |          | 670.32   | 335.66   | V   | 1,720.95 | 860.98   | 1,703.93 | 852.47   | 1,702.94 | 851.97   | 14    |
| 6  | 801.41   | 401.21   |          |          | 783.40   | 392.20   | I   | 1,621.88 | 811.45   | 1,604.86 | 802.93   | 1,603.87 | 802.44   | 13    |
| 7  | 888.44   | 444.73   |          |          | 870.43   | 435.72   | S   | 1,508.80 | 754.90   | 1,491.77 | 746.39   | 1,490.79 | 745.90   | 12    |
| 8  | 1,017.49 | 509.25   | 1,000.46 | 500.73   | 999.48   | 500.24   | Q   | 1,421.77 | 711.39   | 1,404.74 | 702.87   | 1,403.76 | 702.38   | 11    |
| 9  | 1,118.53 | 559.77   | 1,101.51 | 551.26   | 1,100.52 | 550.77   | T   | 1,292.73 | 646.87   | 1,275.70 | 638.35   | 1,274.71 | 637.86   | 10    |
| 10 | 1,231.62 | 616.31   | 1,214.59 | 607.80   | 1,213.61 | 607.31   | I   | 1,191.68 | 596.34   | 1,174.65 | 587.83   | 1,173.67 | 587.34   | 9     |
| 11 | 1,346.64 | 673.83   | 1,329.62 | 665.31   | 1,328.63 | 664.82   | D   | 1,078.59 | 539.80   | 1,061.57 | 531.29   | 1,060.58 | 530.80   | 8     |
| 12 | 1,447.69 | 724.35   | 1,430.67 | 715.84   | 1,429.68 | 715.34   | T   | 963.57   | 482.29   | 946.54   | 473.77   | 945.56   | 473.28   | 7     |
| 13 | 1,560.78 | 780.89   | 1,543.75 | 772.38   | 1,542.77 | 771.89   | I   | 862.52   | 431.76   | 845.49   | 423.25   | 844.51   | 422.76   | 6     |
| 14 | 1,659.84 | 830.43   | 1,642.82 | 821.91   | 1,641.83 | 821.42   | V   | 749.43   | 375.22   | 732.41   | 366.71   | 731.42   | 366.22   | 5     |
| 15 | 1,774.87 | 887.94   | 1,757.85 | 879.43   | 1,756.86 | 878.93   | D   | 650.37   | 325.69   | 633.34   | 317.17   | 632.36   | 316.68   | 4     |
| 16 | 1,905.91 | 953.46   | 1,888.89 | 944.95   | 1,887.90 | 944.45   | M   | 535.34   | 268.17   | 518.31   | 259.66   |          |          | 3     |
| 17 | 2,019.00 | 1,010.00 | 2,001.97 | 1,001.49 | 2,000.99 | 1,001.00 | I   | 404.30   | 202.65   | 387.27   | 194.14   |          |          | 2     |
| 18 |          |          |          |          |          |          | K   | 291.21   | 146.11   | 274.19   | 137.60   |          |          | 1     |

MS/MS Fragmentation of **ALLANALTSALR**

Found in **sp|P57088|TMM33\_HUMAN**, Transmembrane protein 33 OS=Homo sapiens GN=TMEM33 PE=1 SV=2

Match to Query 1123: 1356.825from(679.4199,2+)

Title: 840: Scan 2133 (rt=56.4953, f=2, i=319) [D:\lab212\membrane\Grace\20120305-iTRAQ-2.raw]

Data File:

**Monoisotopic mass of neutral peptide Mr(calc): 1356.825**

**Variable modifications:**

**Ions Score: 47.7 Expect: 0.007**

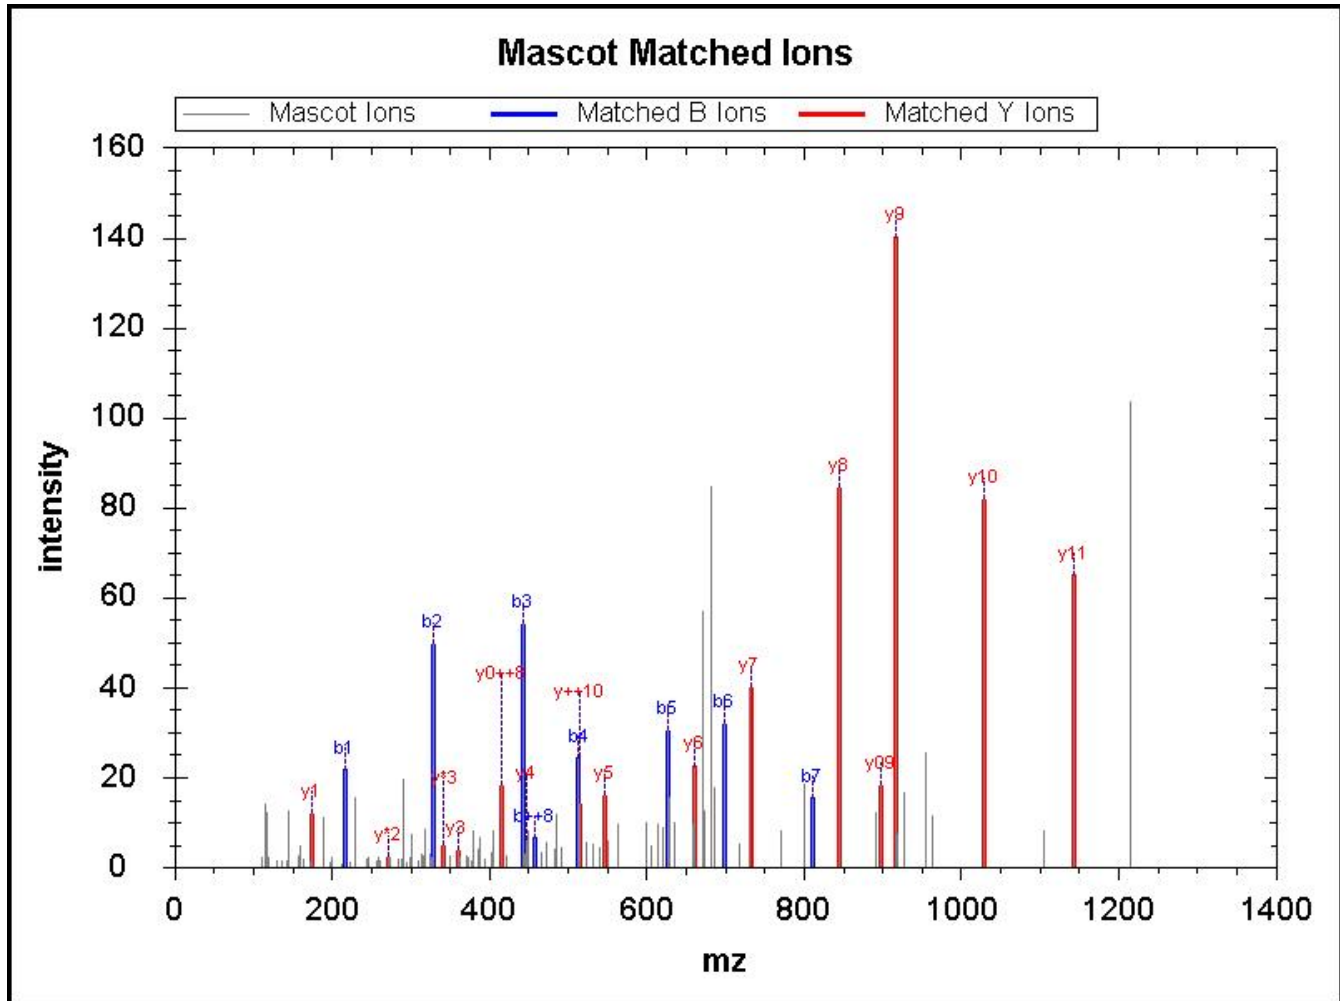

| No | b        | b++    | b*       | b*++   | b0       | b0++   | Seq | y        | y++    | y*       | y*++   | y0       | y0++   | RevNo |
|----|----------|--------|----------|--------|----------|--------|-----|----------|--------|----------|--------|----------|--------|-------|
| 1  | 216.15   | 108.58 |          |        |          |        | A   |          |        |          |        |          |        | 12    |
| 2  | 329.23   | 165.12 |          |        |          |        | L   | 1,142.69 | 571.85 | 1,125.66 | 563.33 | 1,124.68 | 562.84 | 11    |
| 3  | 442.31   | 221.66 |          |        |          |        | L   | 1,029.61 | 515.31 | 1,012.58 | 506.79 | 1,011.59 | 506.30 | 10    |
| 4  | 513.35   | 257.18 |          |        |          |        | A   | 916.52   | 458.76 | 899.49   | 450.25 | 898.51   | 449.76 | 9     |
| 5  | 627.39   | 314.20 | 610.37   | 305.69 |          |        | N   | 845.48   | 423.25 | 828.46   | 414.73 | 827.47   | 414.24 | 8     |
| 6  | 698.43   | 349.72 | 681.41   | 341.21 |          |        | A   | 731.44   | 366.22 | 714.41   | 357.71 | 713.43   | 357.22 | 7     |
| 7  | 811.52   | 406.26 | 794.49   | 397.75 |          |        | L   | 660.40   | 330.71 | 643.38   | 322.19 | 642.39   | 321.70 | 6     |
| 8  | 912.56   | 456.79 | 895.54   | 448.27 | 894.55   | 447.78 | T   | 547.32   | 274.16 | 530.29   | 265.65 | 529.31   | 265.16 | 5     |
| 9  | 999.60   | 500.30 | 982.57   | 491.79 | 981.58   | 491.30 | S   | 446.27   | 223.64 | 429.25   | 215.13 | 428.26   | 214.63 | 4     |
| 10 | 1,070.63 | 535.82 | 1,053.61 | 527.31 | 1,052.62 | 526.81 | A   | 359.24   | 180.12 | 342.21   | 171.61 |          |        | 3     |
| 11 | 1,183.72 | 592.36 | 1,166.69 | 583.85 | 1,165.71 | 583.36 | L   | 288.20   | 144.61 | 271.18   | 136.09 |          |        | 2     |
| 12 |          |        |          |        |          |        | R   | 175.12   | 88.06  | 158.09   | 79.55  |          |        | 1     |

Query 88 Hit 1

MS/MS Fragmentation of **SGNLPSKR**

Found in **sp|P46013|KI67\_HUMAN**, Antigen KI-67 OS=Homo sapiens GN=MKI67 PE=1 SV=2

Match to Query 88: 858.5085from(430.2615,2+)

Title: 201: Scan 892 (rt=28.0862, f=3, i=82) [D:\lab212\membrane\Grace\20120305-iTRAQ-1.raw]

Data File:

**Monoisotopic mass of neutral peptide Mr(calc):** 858.5085

**Variable modifications:**

N3 :Deamidated (NQ)

**Ions Score:** 47.12 **Expect:** 0.012

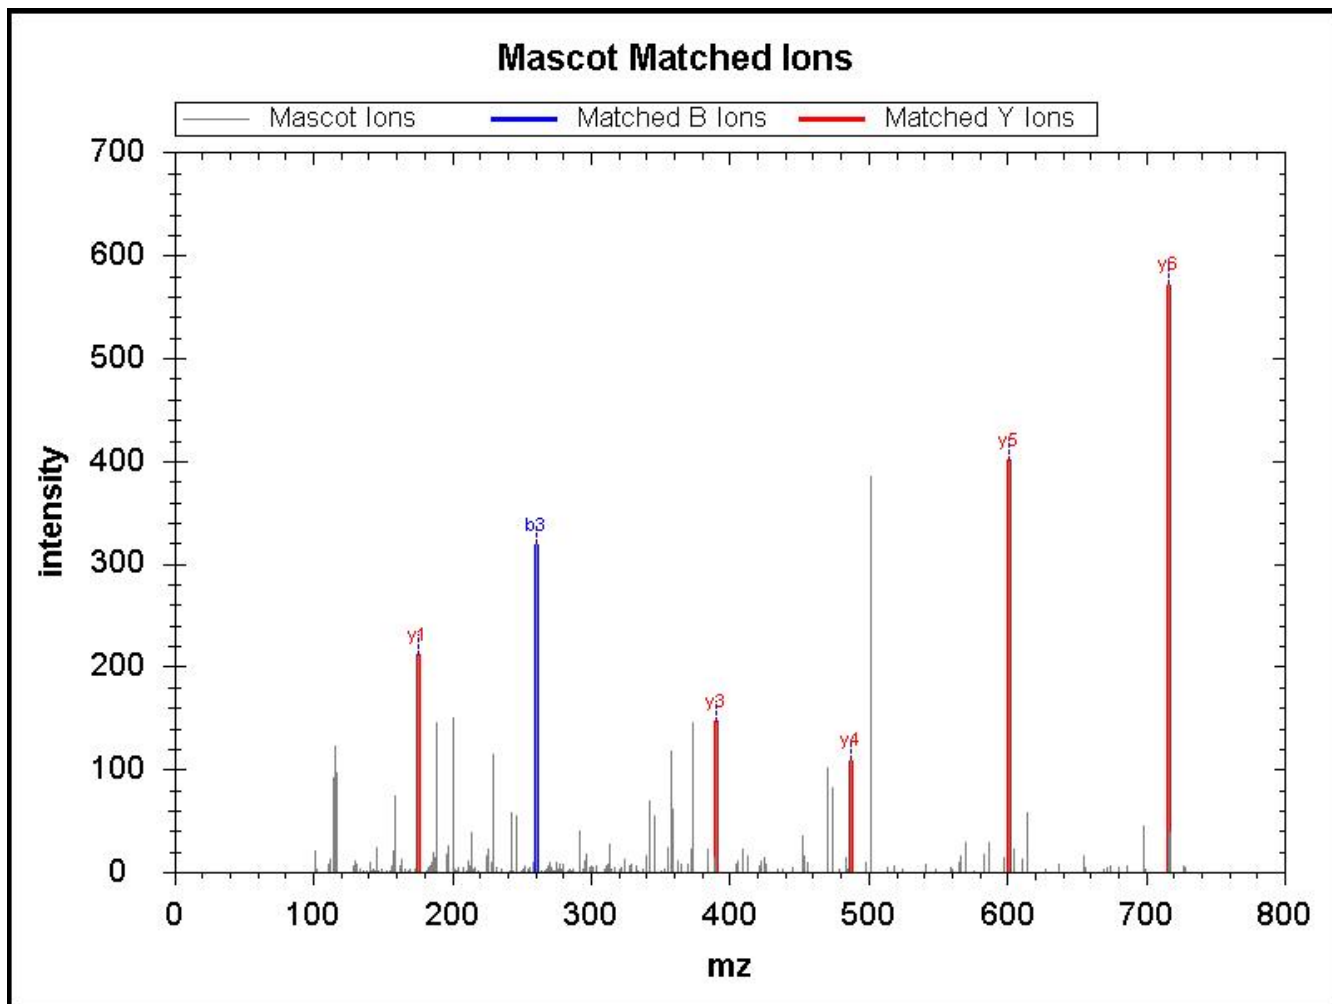

| No | b      | b++    | b*     | b*++   | b0     | b0++   | Seq | y      | y++    | y*     | y*++   | y0     | y0++   | RevNo |
|----|--------|--------|--------|--------|--------|--------|-----|--------|--------|--------|--------|--------|--------|-------|
| 1  | 88.04  | 44.52  |        |        | 70.03  | 35.52  | S   |        |        |        |        |        |        | 8     |
| 2  | 145.06 | 73.03  |        |        | 127.05 | 64.03  | G   | 772.43 | 386.72 | 755.40 | 378.21 | 754.42 | 377.71 | 7     |
| 3  | 260.09 | 130.55 | 243.06 | 122.03 | 242.08 | 121.54 | N   | 715.41 | 358.21 | 698.38 | 349.70 | 697.40 | 349.20 | 6     |
| 4  | 373.17 | 187.09 | 356.15 | 178.58 | 355.16 | 178.08 | L   | 600.38 | 300.70 | 583.36 | 292.18 | 582.37 | 291.69 | 5     |
| 5  | 470.22 | 235.62 | 453.20 | 227.10 | 452.21 | 226.61 | P   | 487.30 | 244.15 | 470.27 | 235.64 | 469.29 | 235.15 | 4     |
| 6  | 557.26 | 279.13 | 540.23 | 270.62 | 539.25 | 270.13 | S   | 390.25 | 195.63 | 373.22 | 187.11 | 372.24 | 186.62 | 3     |
| 7  | 685.35 | 343.18 | 668.32 | 334.67 | 667.34 | 334.17 | K   | 303.21 | 152.11 | 286.19 | 143.60 |        |        | 2     |
| 8  |        |        |        |        |        |        | R   | 175.12 | 88.06  | 158.09 | 79.55  |        |        | 1     |

Query 2302 Hit 1

MS/MS Fragmentation of **NLLSSWDEVIIHADQLR**

Found in **sp|Q15813|TBCE\_HUMAN**, Tubulin-specific chaperone E OS=Homo sapiens GN=TBCE PE=1 SV=1

Match to Query 2302: 2152.149 from (718.3903, 3+)

Title: 1133: Sum of 2 scans in range 2902 (rt=73.3798, f=4, i=794) to 2903 (rt=73.4052, f=4, i=795)

[D:\lab212\membrane\Grace\20120305-iTRAQ-1.raw]

Data File:

**Monoisotopic mass of neutral peptide Mr(calc):** 2152.149

**Variable modifications:**

**Ions Score:** 46.84 **Expect:** 0.018



Variable modifications:  
 K1 iTRAQ4plex (K)  
 K12 iTRAQ4plex (K)  
 Ions Score: 46.59 Expect: 0.017

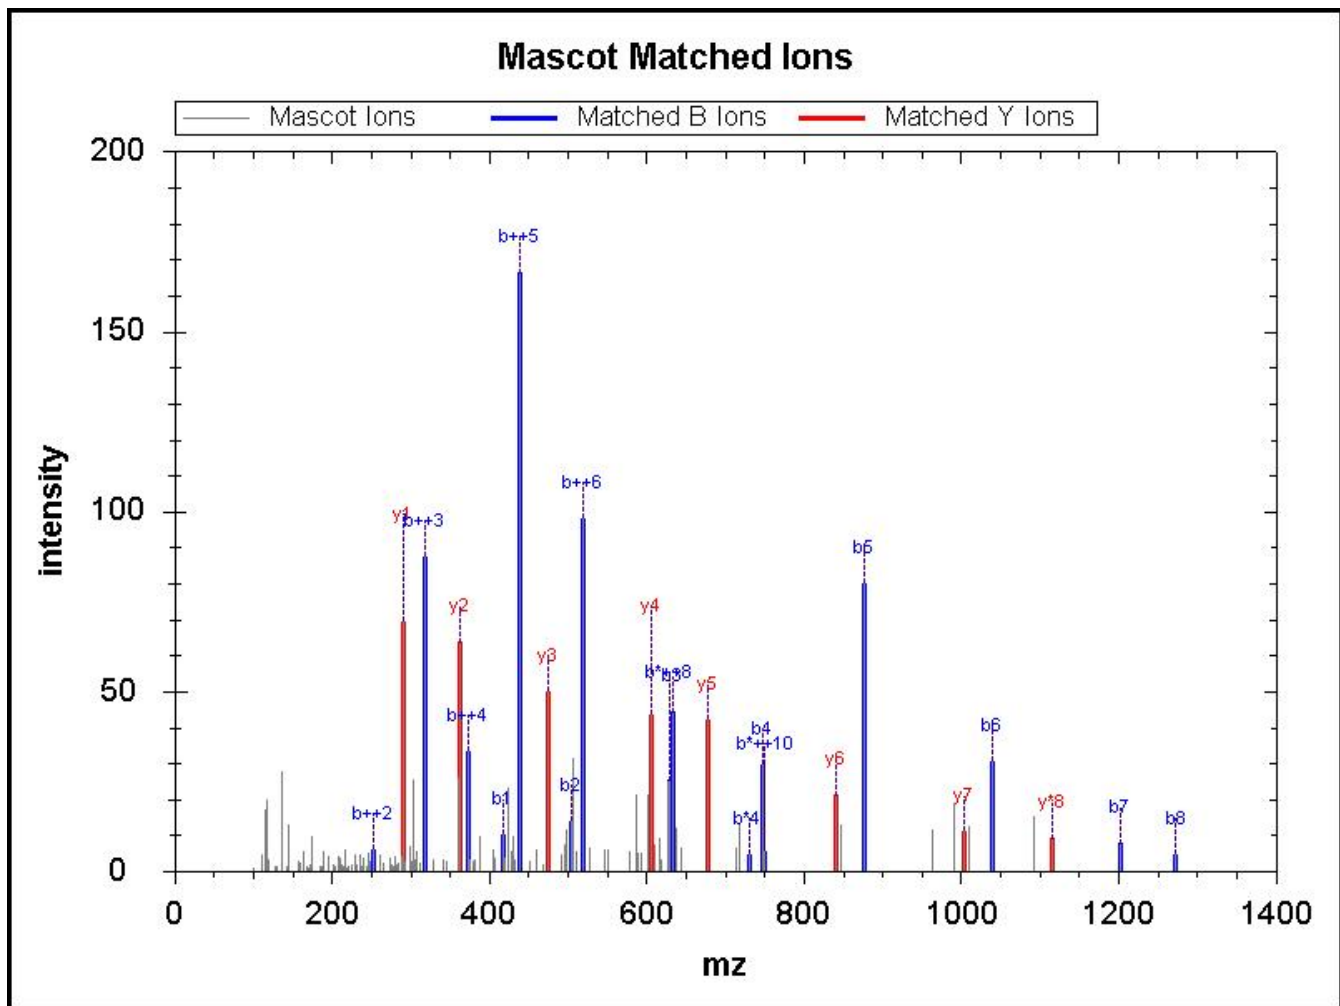

| No | b        | b++    | b*       | b*++   | b0       | b0++   | Seq | y        | y++    | y*       | y*++   | y0       | y0++   | RevNo |
|----|----------|--------|----------|--------|----------|--------|-----|----------|--------|----------|--------|----------|--------|-------|
| 1  | 417.31   | 209.16 | 400.28   | 200.64 |          |        | K   |          |        |          |        |          |        | 12    |
| 2  | 504.34   | 252.67 | 487.31   | 244.16 | 486.33   | 243.67 | S   | 1,461.74 | 731.37 | 1,444.72 | 722.86 | 1,443.73 | 722.37 | 11    |
| 3  | 633.38   | 317.19 | 616.35   | 308.68 | 615.37   | 308.19 | E   | 1,374.71 | 687.86 | 1,357.68 | 679.35 | 1,356.70 | 678.85 | 10    |
| 4  | 746.47   | 373.74 | 729.44   | 365.22 | 728.45   | 364.73 | I   | 1,245.67 | 623.34 | 1,228.64 | 614.82 | 1,227.66 | 614.33 | 9     |
| 5  | 875.51   | 438.26 | 858.48   | 429.74 | 857.50   | 429.25 | E   | 1,132.58 | 566.80 | 1,115.56 | 558.28 | 1,114.57 | 557.79 | 8     |
| 6  | 1,038.57 | 519.79 | 1,021.54 | 511.28 | 1,020.56 | 510.78 | Y   | 1,003.54 | 502.27 | 986.51   | 493.76 |          |        | 7     |
| 7  | 1,201.63 | 601.32 | 1,184.61 | 592.81 | 1,183.62 | 592.32 | Y   | 840.48   | 420.74 | 823.45   | 412.23 |          |        | 6     |
| 8  | 1,272.67 | 636.84 | 1,255.65 | 628.33 | 1,254.66 | 627.83 | A   | 677.41   | 339.21 | 660.39   | 330.70 |          |        | 5     |
| 9  | 1,403.71 | 702.36 | 1,386.69 | 693.85 | 1,385.70 | 693.35 | M   | 606.38   | 303.69 | 589.35   | 295.18 |          |        | 4     |
| 10 | 1,516.80 | 758.90 | 1,499.77 | 750.39 | 1,498.79 | 749.90 | L   | 475.34   | 238.17 | 458.31   | 229.66 |          |        | 3     |
| 11 | 1,587.83 | 794.42 | 1,570.81 | 785.91 | 1,569.82 | 785.41 | A   | 362.25   | 181.63 | 345.23   | 173.12 |          |        | 2     |
| 12 |          |        |          |        |          |        | K   | 291.21   | 146.11 | 274.19   | 137.60 |          |        | 1     |

Query 2362 Hit 1

MS/MS Fragmentation of **IDLRPVLGEGVPILASFLR**

Found in **sp|Q86VP6|CAND1\_HUMAN**, Cullin-associated NEDD8-dissociated protein 1 OS=Homo sapiens GN=CAND1 PE=1 SV=2  
 Match to Query 2362: 2208.309from(737.1104,3+)

Title: 1159: Scan 2969 (rt=74.8872, f=3, i=417) [D:\lab212\membrane\Grace\20120305-iTRAQ-1.raw]

Data File:

**Monoisotopic mass of neutral peptide Mr(calc): 2208.309**

**Variable modifications:**

**Ions Score: 46.27 Expect: 0.006**









|    |  |  |  |  |  |  |   |        |        |        |        |  |  |   |
|----|--|--|--|--|--|--|---|--------|--------|--------|--------|--|--|---|
| 19 |  |  |  |  |  |  | K | 291.21 | 146.11 | 274.19 | 137.60 |  |  | 1 |
|----|--|--|--|--|--|--|---|--------|--------|--------|--------|--|--|---|

Query 1322 Hit 1

MS/MS Fragmentation of **IQAIELEDLLR**

Found in **sp|P21810|PGS1\_HUMAN**, Biglycan OS=Homo sapiens GN=BGN PE=1 SV=2

Match to Query 1322: 1455.845from(728.9296,2+)

Title: 883: Sum of 2 scans in range 2356 (rt=61.0782, f=4, i=618) to 2357 (rt=61.1036, f=4, i=619)

[D:\lab212\membrane\Grace\20120305-iTRAQ-1.raw]

Data File:

**Monoisotopic mass of neutral peptide Mr(calc): 1455.845**

**Variable modifications:**

**Ions Score: 45.11 Expect: 0.018**

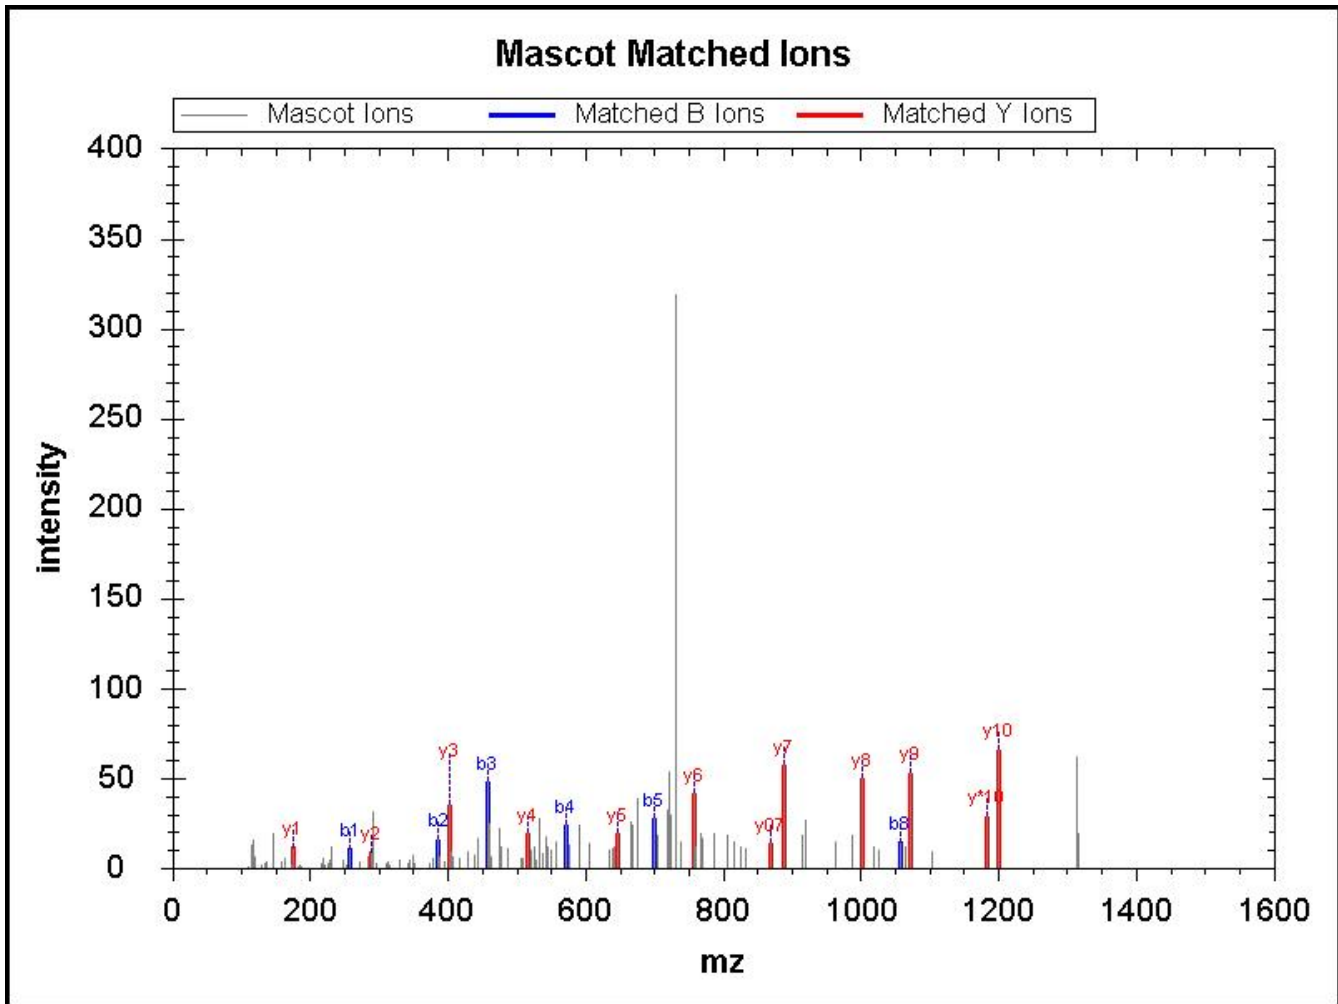

| No | b        | b++    | b*       | b*++   | b0       | b0++   | Seq | y        | y++    | y*       | y*++   | y0       | y0++   | RevNo |
|----|----------|--------|----------|--------|----------|--------|-----|----------|--------|----------|--------|----------|--------|-------|
| 1  | 258.19   | 129.60 |          |        |          |        | I   |          |        |          |        |          |        | 11    |
| 2  | 386.25   | 193.63 | 369.23   | 185.12 |          |        | Q   | 1,199.66 | 600.34 | 1,182.64 | 591.82 | 1,181.65 | 591.33 | 10    |
| 3  | 457.29   | 229.15 | 440.26   | 220.63 |          |        | A   | 1,071.60 | 536.31 | 1,054.58 | 527.79 | 1,053.59 | 527.30 | 9     |
| 4  | 570.37   | 285.69 | 553.35   | 277.18 |          |        | I   | 1,000.57 | 500.79 | 983.54   | 492.27 | 982.56   | 491.78 | 8     |
| 5  | 699.42   | 350.21 | 682.39   | 341.70 | 681.41   | 341.21 | E   | 887.48   | 444.25 | 870.46   | 435.73 | 869.47   | 435.24 | 7     |
| 6  | 812.50   | 406.75 | 795.47   | 398.24 | 794.49   | 397.75 | L   | 758.44   | 379.72 | 741.41   | 371.21 | 740.43   | 370.72 | 6     |
| 7  | 941.54   | 471.27 | 924.52   | 462.76 | 923.53   | 462.27 | E   | 645.36   | 323.18 | 628.33   | 314.67 | 627.35   | 314.18 | 5     |
| 8  | 1,056.57 | 528.79 | 1,039.54 | 520.28 | 1,038.56 | 519.78 | D   | 516.31   | 258.66 | 499.29   | 250.15 | 498.30   | 249.66 | 4     |
| 9  | 1,169.65 | 585.33 | 1,152.63 | 576.82 | 1,151.64 | 576.33 | L   | 401.29   | 201.15 | 384.26   | 192.63 |          |        | 3     |
| 10 | 1,282.74 | 641.87 | 1,265.71 | 633.36 | 1,264.73 | 632.87 | L   | 288.20   | 144.61 | 271.18   | 136.09 |          |        | 2     |
| 11 |          |        |          |        |          |        | R   | 175.12   | 88.06  | 158.09   | 79.55  |          |        | 1     |

Query 856 Hit 1

MS/MS Fragmentation of **LMDVGLIAIR**

Found in **sp|P31948|STIP1\_HUMAN**, Stress-induced-phosphoprotein 1 OS=Homo sapiens GN=STIP1 PE=1 SV=1

Match to Query 856: 1243.751 from (622.8829, 2+)

Title: 853: Scan 2159 (rt=57.0835, f=3, i=297) [D:\lab212\membrane\Grace\20120305-iTRAQ-2.raw]

Data File:

**Monoisotopic mass of neutral peptide Mr(calc): 1243.751**

**Variable modifications:**

**Ions Score: 44.76 Expect: 0.019**

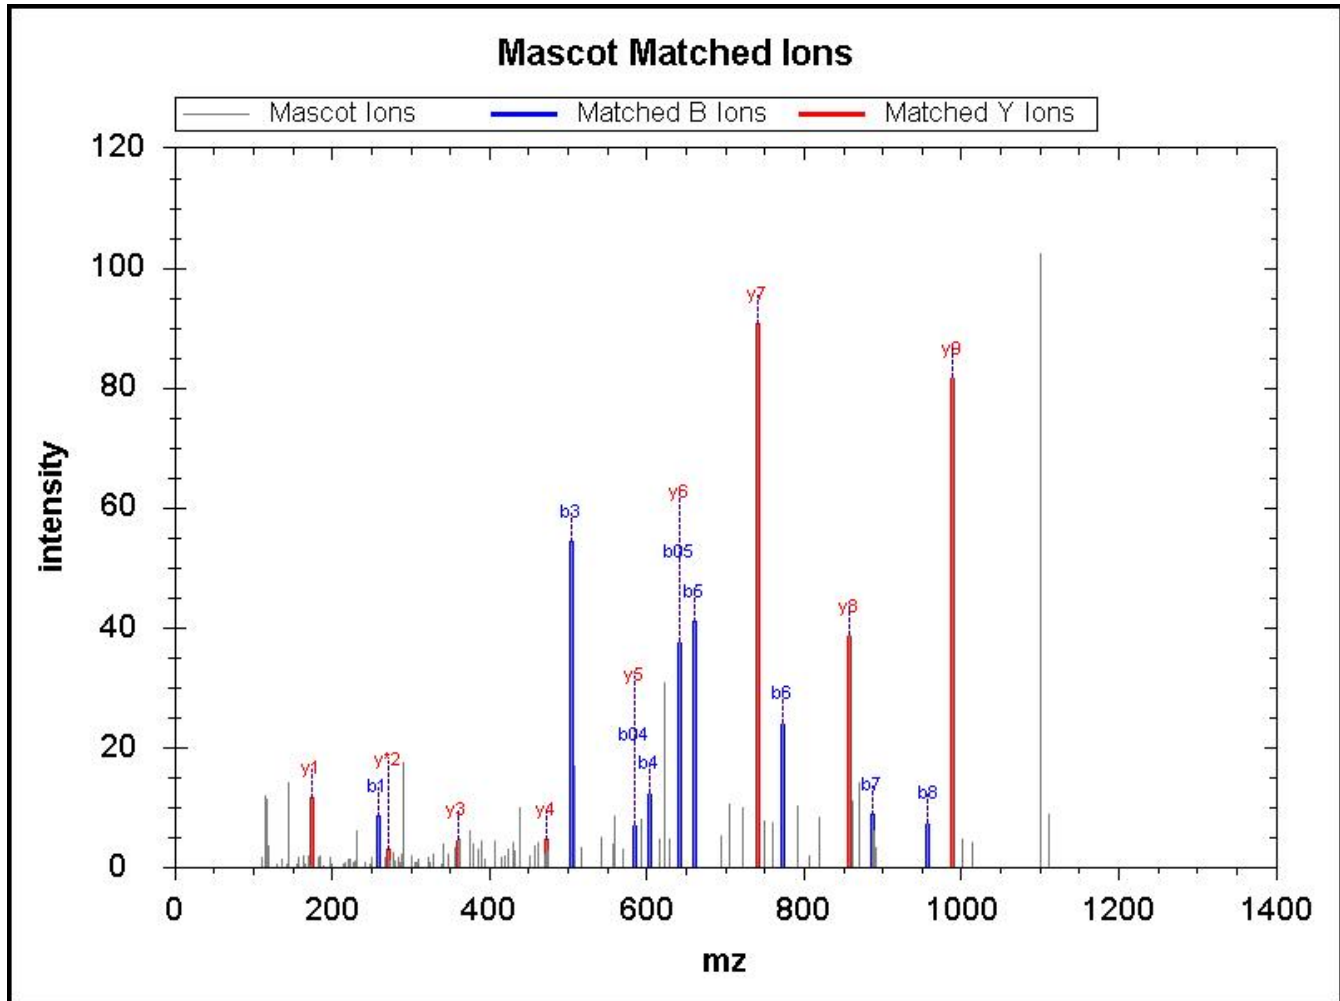

| No | b             | b++    | b0            | b0++   | Seq | y             | y++    | y*            | y*++   | y0     | y0++   | RevNo |
|----|---------------|--------|---------------|--------|-----|---------------|--------|---------------|--------|--------|--------|-------|
| 1  | <b>258.19</b> | 129.60 |               |        | L   |               |        |               |        |        |        | 10    |
| 2  | 389.23        | 195.12 |               |        | M   | <b>987.57</b> | 494.29 | 970.54        | 485.77 | 969.55 | 485.28 | 9     |
| 3  | <b>504.26</b> | 252.63 | 486.25        | 243.63 | D   | <b>856.53</b> | 428.77 | 839.50        | 420.25 | 838.51 | 419.76 | 8     |
| 4  | <b>603.33</b> | 302.17 | <b>585.32</b> | 293.16 | V   | <b>741.50</b> | 371.25 | 724.47        | 362.74 |        |        | 7     |
| 5  | <b>660.35</b> | 330.68 | <b>642.34</b> | 321.67 | G   | <b>642.43</b> | 321.72 | 625.40        | 313.21 |        |        | 6     |
| 6  | <b>773.43</b> | 387.22 | 755.42        | 378.22 | L   | <b>585.41</b> | 293.21 | 568.38        | 284.69 |        |        | 5     |
| 7  | <b>886.52</b> | 443.76 | 868.51        | 434.76 | I   | <b>472.32</b> | 236.67 | 455.30        | 228.15 |        |        | 4     |
| 8  | <b>957.56</b> | 479.28 | 939.55        | 470.28 | A   | <b>359.24</b> | 180.12 | 342.21        | 171.61 |        |        | 3     |
| 9  | 1,070.64      | 535.82 | 1,052.63      | 526.82 | I   | 288.20        | 144.61 | <b>271.18</b> | 136.09 |        |        | 2     |
| 10 |               |        |               |        | R   | <b>175.12</b> | 88.06  | 158.09        | 79.55  |        |        | 1     |

Query 1906 Hit 1

MS/MS Fragmentation of **ITFVDFIAYDVLER**

Found in **sp|P28161|GSTM2\_HUMAN**, Glutathione S-transferase Mu 2 OS=Homo sapiens GN=GSTM2 PE=1 SV=2

Match to Query 1906: 1843.994 from (923.0045, 2+)

Title: 1184: Sum of 2 scans in range 3026 (rt=76.1738, f=4, i=834) to 3027 (rt=76.1992, f=4, i=835)

[D:\lab212\membrane\Grace\20120305-iTRAQ-1.raw]

Data File:

**Monoisotopic mass of neutral peptide Mr(calc):** 1843.994

**Variable modifications:**

**Ions Score:** 44.08 **Expect:** 0.032

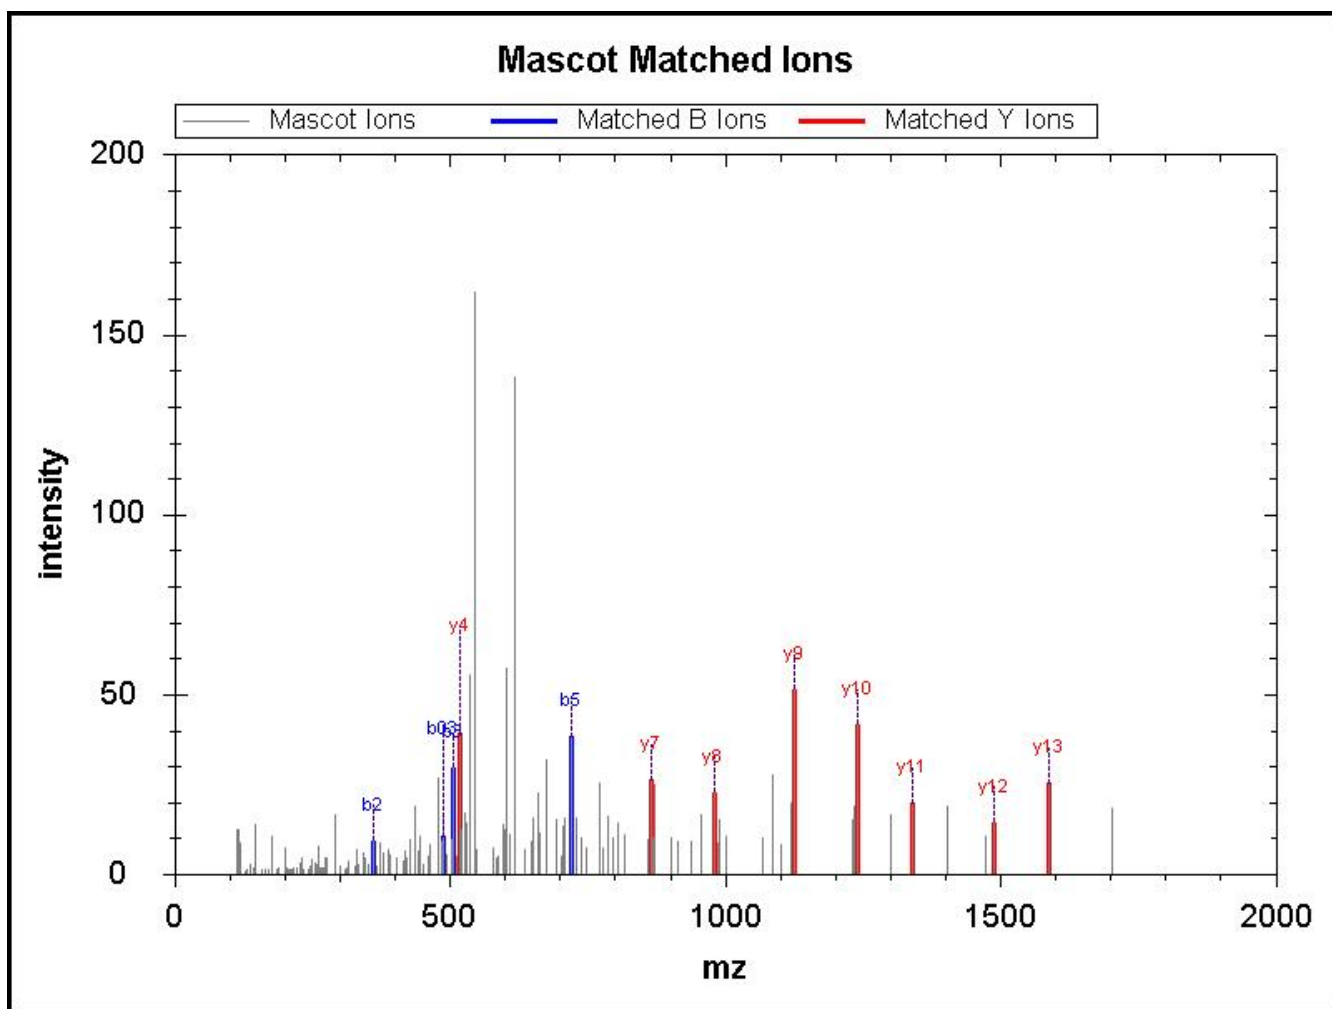

| No | b        | b++    | b0       | b0++   | Seq | y        | y++    | y*       | y*++   | y0       | y0++   | RevNo |
|----|----------|--------|----------|--------|-----|----------|--------|----------|--------|----------|--------|-------|
| 1  | 258.19   | 129.60 |          |        | I   |          |        |          |        |          |        | 14    |
| 2  | 359.24   | 180.12 | 341.23   | 171.12 | T   | 1,587.81 | 794.41 | 1,570.78 | 785.89 | 1,569.79 | 785.40 | 13    |
| 3  | 506.31   | 253.66 | 488.30   | 244.65 | F   | 1,486.76 | 743.88 | 1,469.73 | 735.37 | 1,468.75 | 734.88 | 12    |
| 4  | 605.38   | 303.19 | 587.37   | 294.19 | V   | 1,339.69 | 670.35 | 1,322.66 | 661.83 | 1,321.68 | 661.34 | 11    |
| 5  | 720.40   | 360.71 | 702.39   | 351.70 | D   | 1,240.62 | 620.81 | 1,223.59 | 612.30 | 1,222.61 | 611.81 | 10    |
| 6  | 867.47   | 434.24 | 849.46   | 425.23 | F   | 1,125.59 | 563.30 | 1,108.57 | 554.79 | 1,107.58 | 554.30 | 9     |
| 7  | 980.56   | 490.78 | 962.55   | 481.78 | I   | 978.53   | 489.77 | 961.50   | 481.25 | 960.51   | 480.76 | 8     |
| 8  | 1,051.59 | 526.30 | 1,033.58 | 517.30 | A   | 865.44   | 433.22 | 848.41   | 424.71 | 847.43   | 424.22 | 7     |
| 9  | 1,214.66 | 607.83 | 1,196.65 | 598.83 | Y   | 794.40   | 397.71 | 777.38   | 389.19 | 776.39   | 388.70 | 6     |
| 10 | 1,329.68 | 665.35 | 1,311.67 | 656.34 | D   | 631.34   | 316.17 | 614.31   | 307.66 | 613.33   | 307.17 | 5     |
| 11 | 1,428.75 | 714.88 | 1,410.74 | 705.87 | V   | 516.31   | 258.66 | 499.29   | 250.15 | 498.30   | 249.66 | 4     |
| 12 | 1,541.84 | 771.42 | 1,523.83 | 762.42 | L   | 417.25   | 209.13 | 400.22   | 200.61 | 399.24   | 200.12 | 3     |
| 13 | 1,670.88 | 835.94 | 1,652.87 | 826.94 | E   | 304.16   | 152.58 | 287.13   | 144.07 | 286.15   | 143.58 | 2     |
| 14 |          |        |          |        | R   | 175.12   | 88.06  | 158.09   | 79.55  |          |        | 1     |

Query 906 Hit 1

MS/MS Fragmentation of **LWWLDLK**

Found in **sp|P02790|HEMO\_HUMAN**, Hemopexin OS=Homo sapiens GN=HPX PE=1 SV=2

Match to Query 906: 1260.756from(631.3855,2+)

Title: 943: Scan 2492 (rt=64.138, f=3, i=340) [D:\lab212\membrane\Grace\20120305-iTRAQ-1.raw]

Data File:

Monoisotopic mass of neutral peptide Mr(calc): 1260.756

Variable modifications:

K7 iTRAQ4plex (K)

Ions Score: 43.71 Expect: 0.027

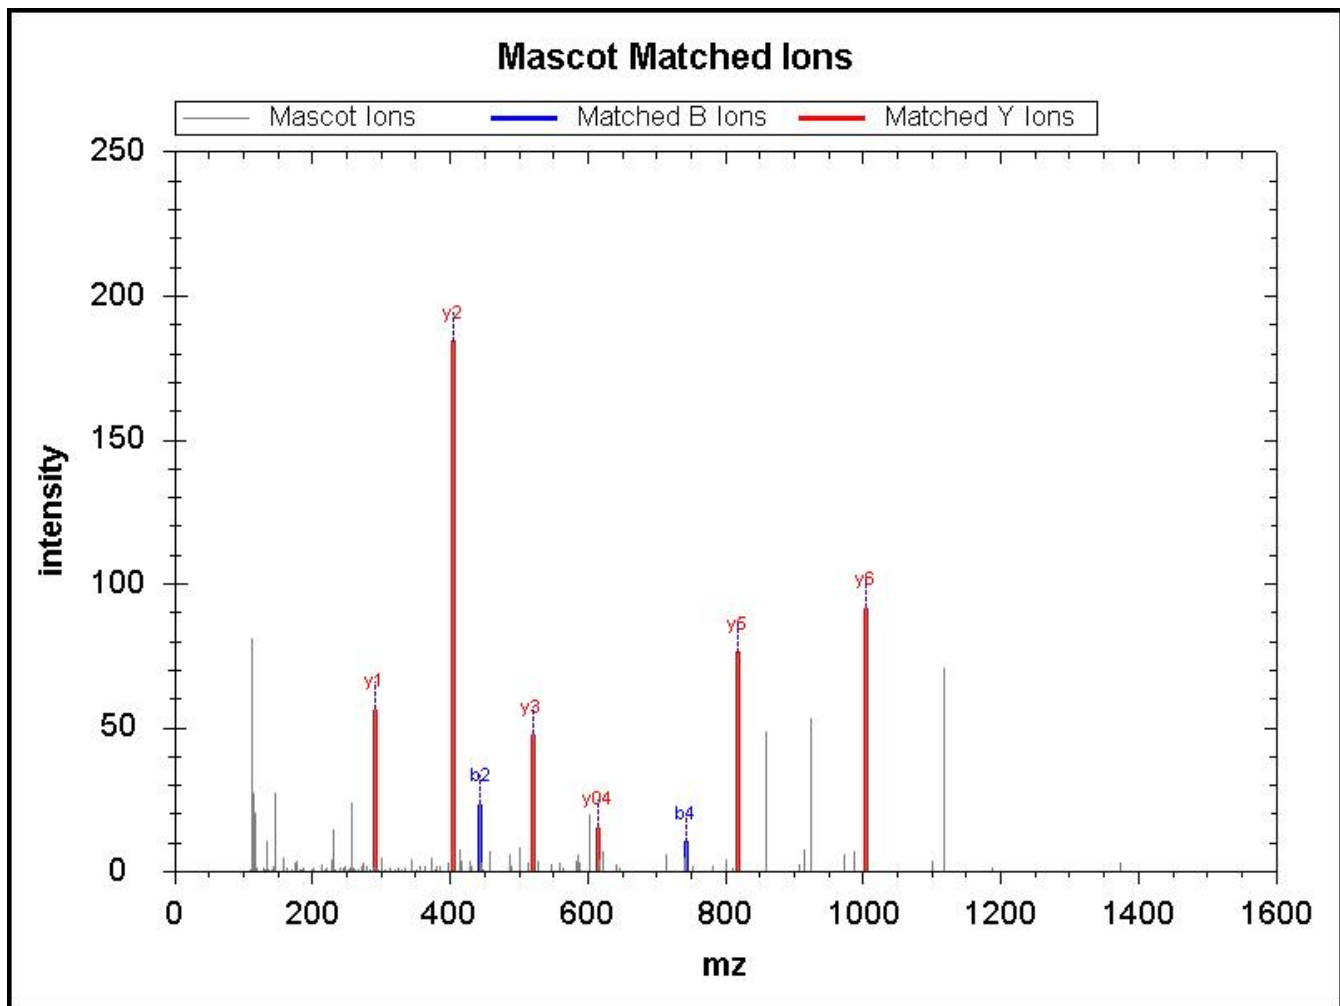

| No | b      | b++    | b0     | b0++   | Seq | y        | y++    | y*     | y*++   | y0     | y0++   | RevNo |
|----|--------|--------|--------|--------|-----|----------|--------|--------|--------|--------|--------|-------|
| 1  | 258.19 | 129.60 |        |        | L   |          |        |        |        |        |        | 7     |
| 2  | 444.27 | 222.64 |        |        | W   | 1,004.57 | 502.79 | 987.54 | 494.27 | 986.56 | 493.78 | 6     |
| 3  | 630.35 | 315.68 |        |        | W   | 818.49   | 409.75 | 801.46 | 401.23 | 800.48 | 400.74 | 5     |
| 4  | 743.44 | 372.22 |        |        | L   | 632.41   | 316.71 | 615.38 | 308.20 | 614.40 | 307.70 | 4     |
| 5  | 858.46 | 429.74 | 840.45 | 420.73 | D   | 519.33   | 260.17 | 502.30 | 251.65 | 501.32 | 251.16 | 3     |
| 6  | 971.55 | 486.28 | 953.54 | 477.27 | L   | 404.30   | 202.65 | 387.27 | 194.14 |        |        | 2     |
| 7  |        |        |        |        | K   | 291.21   | 146.11 | 274.19 | 137.60 |        |        | 1     |

Query 1489 Hit 1

MS/MS Fragmentation of **NIPGITLLNVSK**

Found in **sp|P36578|R14\_HUMAN**, 60S ribosomal protein L4 OS=Homo sapiens GN=RPL4 PE=1 SV=5

Match to Query 1489: 1555.964from(778.9894,2+)

Title: 751: Sum of 2 scans in range 1943 (rt=52.2193, f=4, i=518) to 1944 (rt=52.2447, f=4, i=519)

[D:\lab212\membrane\Grace\20120305-iTRAQ-2.raw]

Data File:

Monoisotopic mass of neutral peptide Mr(calc): 1555.964

Variable modifications:

K12 iTRAQ4plex (K)

Ions Score: 42.92 Expect: 0.014

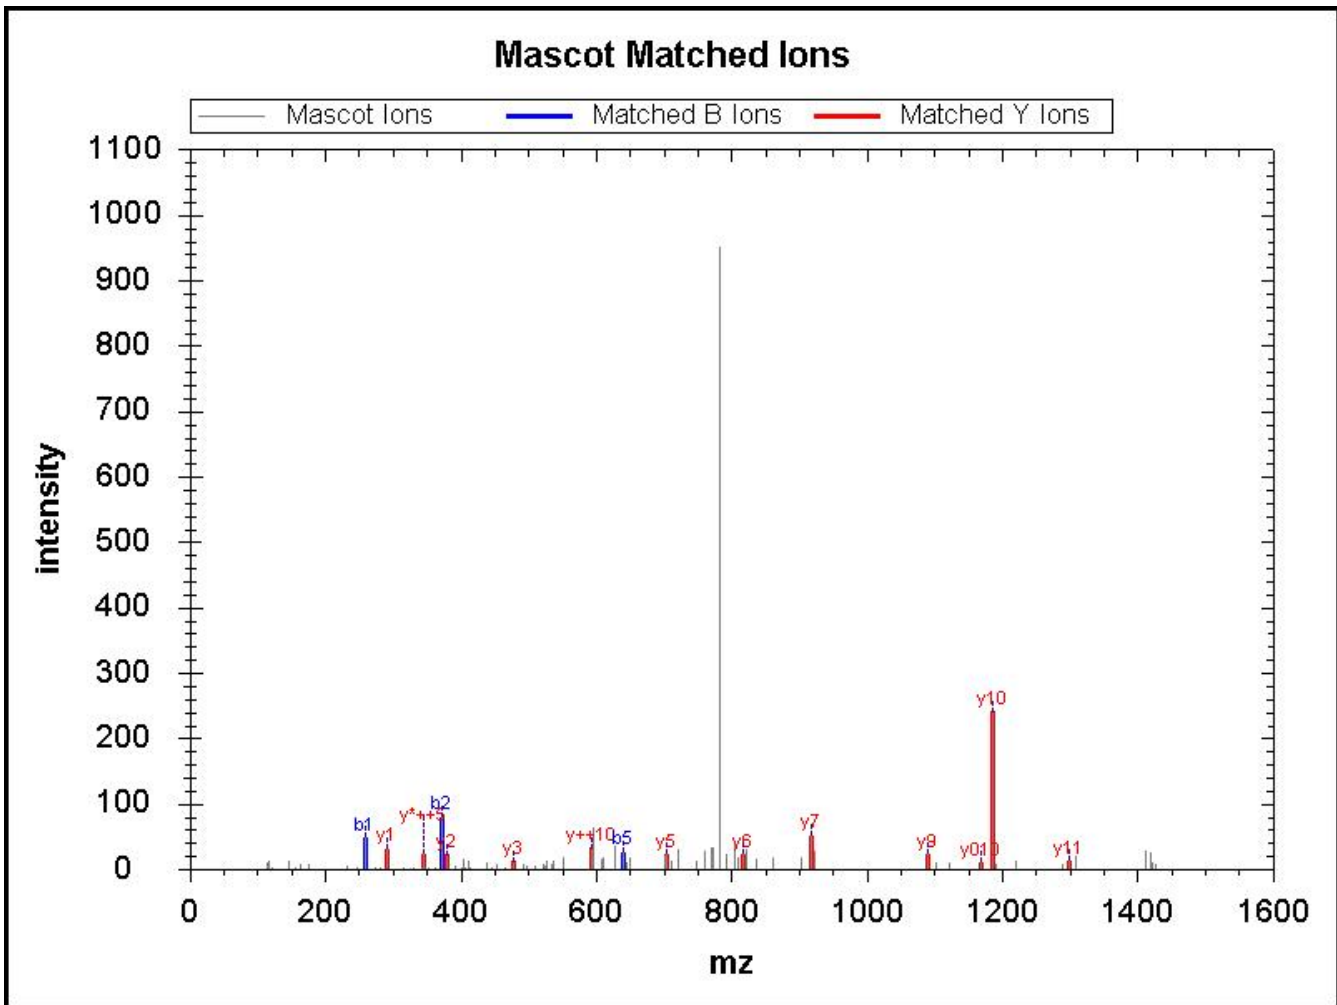

| No | b        | b++    | b*       | b*++   | b0       | b0++   | Seq | y        | y++    | y*       | y*++   | y0       | y0++   | RevNo |
|----|----------|--------|----------|--------|----------|--------|-----|----------|--------|----------|--------|----------|--------|-------|
| 1  | 259.15   | 130.08 | 242.13   | 121.57 |          |        | N   |          |        |          |        |          |        | 12    |
| 2  | 372.24   | 186.62 | 355.21   | 178.11 |          |        | I   | 1,298.82 | 649.91 | 1,281.79 | 641.40 | 1,280.81 | 640.91 | 11    |
| 3  | 469.29   | 235.15 | 452.26   | 226.63 |          |        | P   | 1,185.73 | 593.37 | 1,168.71 | 584.86 | 1,167.72 | 584.36 | 10    |
| 4  | 526.31   | 263.66 | 509.28   | 255.15 |          |        | G   | 1,088.68 | 544.84 | 1,071.65 | 536.33 | 1,070.67 | 535.84 | 9     |
| 5  | 639.39   | 320.20 | 622.37   | 311.69 |          |        | I   | 1,031.66 | 516.33 | 1,014.63 | 507.82 | 1,013.65 | 507.33 | 8     |
| 6  | 740.44   | 370.72 | 723.42   | 362.21 | 722.43   | 361.72 | T   | 918.57   | 459.79 | 901.55   | 451.28 | 900.56   | 450.79 | 7     |
| 7  | 853.53   | 427.27 | 836.50   | 418.75 | 835.52   | 418.26 | L   | 817.53   | 409.27 | 800.50   | 400.75 | 799.52   | 400.26 | 6     |
| 8  | 966.61   | 483.81 | 949.58   | 475.30 | 948.60   | 474.80 | L   | 704.44   | 352.72 | 687.42   | 344.21 | 686.43   | 343.72 | 5     |
| 9  | 1,080.65 | 540.83 | 1,063.63 | 532.32 | 1,062.64 | 531.83 | N   | 591.36   | 296.18 | 574.33   | 287.67 | 573.35   | 287.18 | 4     |
| 10 | 1,179.72 | 590.36 | 1,162.70 | 581.85 | 1,161.71 | 581.36 | V   | 477.32   | 239.16 | 460.29   | 230.65 | 459.30   | 230.16 | 3     |
| 11 | 1,266.75 | 633.88 | 1,249.73 | 625.37 | 1,248.74 | 624.88 | S   | 378.25   | 189.63 | 361.22   | 181.11 | 360.24   | 180.62 | 2     |
| 12 |          |        |          |        |          |        | K   | 291.21   | 146.11 | 274.19   | 137.60 |          |        | 1     |

Query 1838 Hit 1

MS/MS Fragmentation of **FFEVLIDPFHK**

Found in **sp|P61313|RPL15\_HUMAN**, 60S ribosomal protein L15 OS=Homo sapiens GN=RPL15 PE=1 SV=2

Match to Query 1838: 1792.025from(598.3489,3+)

Title: 1000: Scan 2615 (rt=66.9066, f=2, i=387) [D:\lab212\membrane\Grace\20120305-iTRAQ-1.raw]

Data File:

**Monoisotopic mass of neutral peptide Mr(calc): 1792.025**

**Variable modifications:**

**K12** iTRAQ4plex (K)

**Ions Score: 42.89 Expect: 0.032**



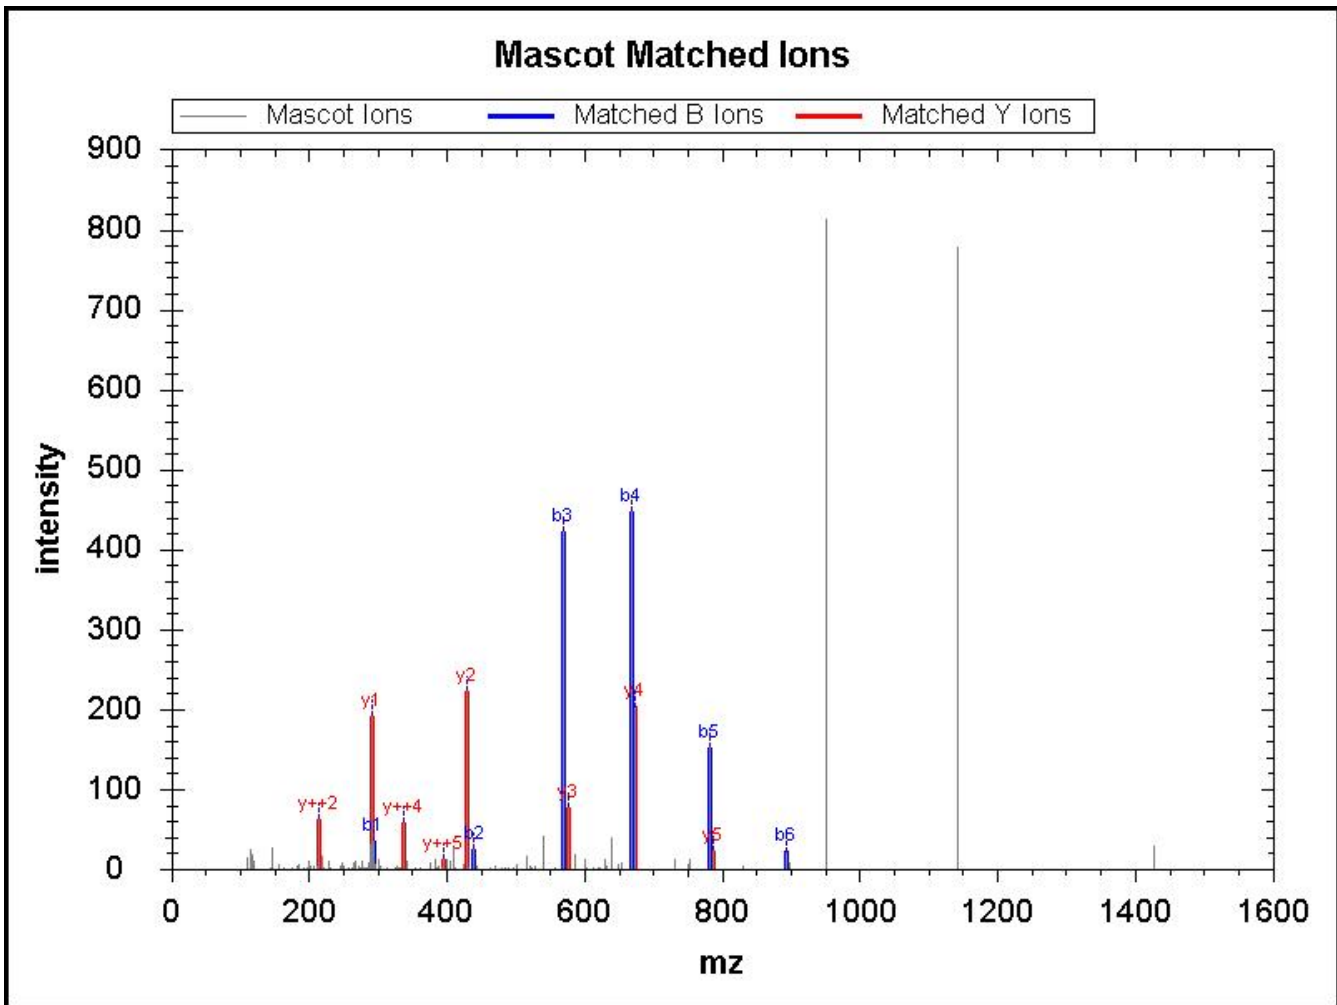

| No | b        | b++    | b0       | b0++   | Seq | y        | y++    | y*       | y*++   | y0       | y0++   | RevNo |
|----|----------|--------|----------|--------|-----|----------|--------|----------|--------|----------|--------|-------|
| 1  | 292.18   | 146.59 |          |        | F   |          |        |          |        |          |        | 12    |
| 2  | 439.25   | 220.13 |          |        | F   | 1,501.85 | 751.43 | 1,484.83 | 742.92 | 1,483.84 | 742.42 | 11    |
| 3  | 568.29   | 284.65 | 550.28   | 275.64 | E   | 1,354.78 | 677.90 | 1,337.76 | 669.38 | 1,336.77 | 668.89 | 10    |
| 4  | 667.36   | 334.18 | 649.35   | 325.18 | V   | 1,225.74 | 613.37 | 1,208.72 | 604.86 | 1,207.73 | 604.37 | 9     |
| 5  | 780.44   | 390.72 | 762.43   | 381.72 | I   | 1,126.67 | 563.84 | 1,109.65 | 555.33 | 1,108.66 | 554.84 | 8     |
| 6  | 893.53   | 447.27 | 875.51   | 438.26 | L   | 1,013.59 | 507.30 | 996.56   | 498.79 | 995.58   | 498.29 | 7     |
| 7  | 1,006.61 | 503.81 | 988.60   | 494.80 | I   | 900.51   | 450.76 | 883.48   | 442.24 | 882.50   | 441.75 | 6     |
| 8  | 1,121.64 | 561.32 | 1,103.63 | 552.32 | D   | 787.42   | 394.21 | 770.40   | 385.70 | 769.41   | 385.21 | 5     |
| 9  | 1,218.69 | 609.85 | 1,200.68 | 600.84 | P   | 672.39   | 336.70 | 655.37   | 328.19 |          |        | 4     |
| 10 | 1,365.76 | 683.38 | 1,347.75 | 674.38 | F   | 575.34   | 288.17 | 558.32   | 279.66 |          |        | 3     |
| 11 | 1,502.82 | 751.91 | 1,484.81 | 742.91 | H   | 428.27   | 214.64 | 411.25   | 206.13 |          |        | 2     |
| 12 |          |        |          |        | K   | 291.21   | 146.11 | 274.19   | 137.60 |          |        | 1     |

Query 687 Hit 1

MS/MS Fragmentation of **ALVMLLEVR**

Found in **sp|Q92973|TNPO1\_HUMAN**, Transportin-1 OS=Homo sapiens GN=TNPO1 PE=1 SV=2

Match to Query 687: 1186.727from(594.3709,2+)

Title: 916: Sum of 2 scans in range 2296 (rt=60.1744, f=4, i=632) to 2297 (rt=60.1999, f=4, i=633)

[D:\lab212\membrane\Grace\20120305-iTRAQ-2.raw]

Data File:

**Monoisotopic mass of neutral peptide Mr(calc): 1186.727**

**Variable modifications:**

**Ions Score: 42.82 Expect: 0.027**

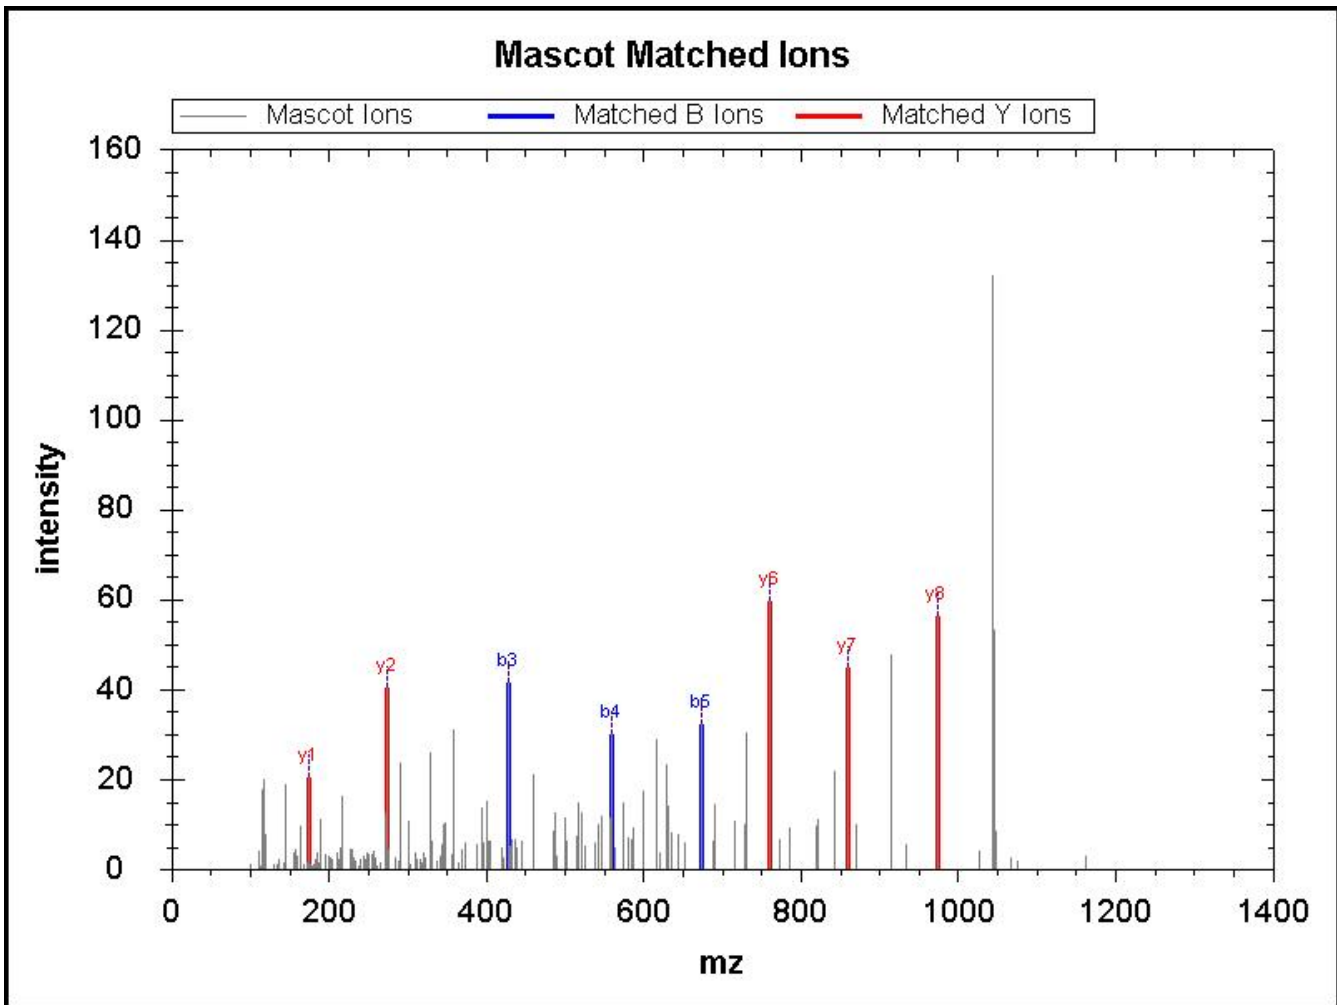

| No | b        | b++    | b0     | b0++   | Seq | y      | y++    | y*     | y*++   | y0     | y0++   | RevNo |
|----|----------|--------|--------|--------|-----|--------|--------|--------|--------|--------|--------|-------|
| 1  | 216.15   | 108.58 |        |        | A   |        |        |        |        |        |        | 9     |
| 2  | 329.23   | 165.12 |        |        | L   | 972.59 | 486.80 | 955.56 | 478.29 | 954.58 | 477.79 | 8     |
| 3  | 428.30   | 214.65 |        |        | V   | 859.51 | 430.26 | 842.48 | 421.74 | 841.50 | 421.25 | 7     |
| 4  | 559.34   | 280.17 |        |        | M   | 760.44 | 380.72 | 743.41 | 372.21 | 742.43 | 371.72 | 6     |
| 5  | 672.42   | 336.72 |        |        | L   | 629.40 | 315.20 | 612.37 | 306.69 | 611.39 | 306.20 | 5     |
| 6  | 785.51   | 393.26 |        |        | L   | 516.31 | 258.66 | 499.29 | 250.15 | 498.30 | 249.66 | 4     |
| 7  | 914.55   | 457.78 | 896.54 | 448.77 | E   | 403.23 | 202.12 | 386.20 | 193.61 | 385.22 | 193.11 | 3     |
| 8  | 1,013.62 | 507.31 | 995.61 | 498.31 | V   | 274.19 | 137.60 | 257.16 | 129.08 |        |        | 2     |
| 9  |          |        |        |        | R   | 175.12 | 88.06  | 158.09 | 79.55  |        |        | 1     |

Query 1365 Hit 1

MS/MS Fragmentation of **VMVQPINLIFR**

Found in **sp|P62304|RUXE\_HUMAN**, Small nuclear ribonucleoprotein E OS=Homo sapiens GN=SNRPE PE=1 SV=1

Match to Query 1365: 1472.871 from (737.4426, 2+)

Title: 903: Scan 2399 (rt=62.0425, f=3, i=325) [D:\lab212\membrane\Grace\20120305-iTRAQ-1.raw]

Data File:

**Monoisotopic mass of neutral peptide Mr(calc): 1472.871**

**Variable modifications:**

**Ions Score: 42.71 Expect: 0.031**



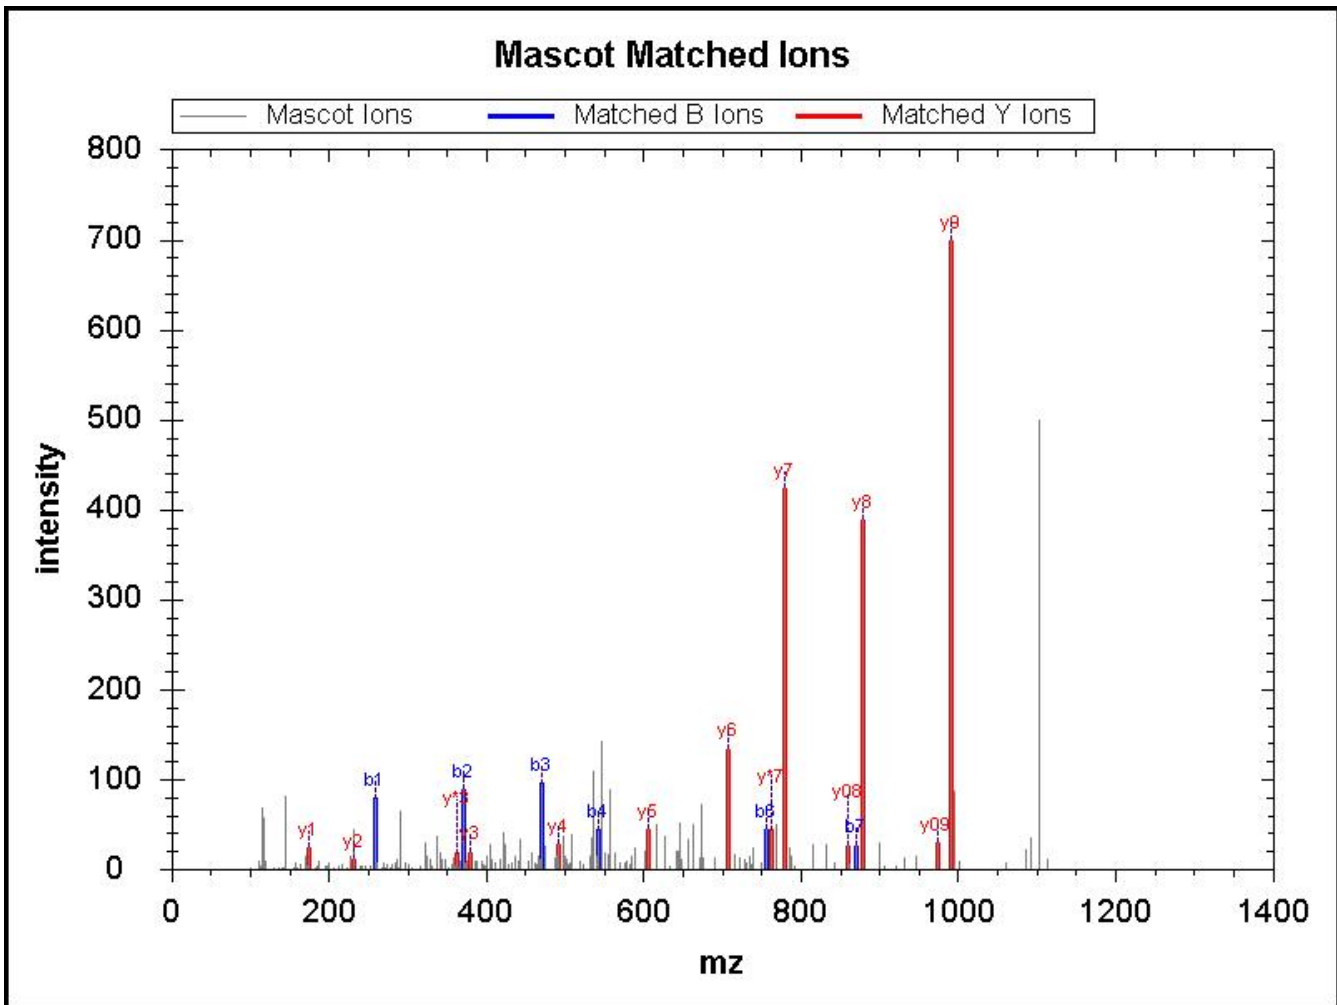

| No | b        | b++    | b*       | b*++   | b0       | b0++   | Seq | y      | y++    | y*     | y*++   | y0     | y0++   | RevNo |
|----|----------|--------|----------|--------|----------|--------|-----|--------|--------|--------|--------|--------|--------|-------|
| 1  | 258.19   | 129.60 |          |        |          |        | I   |        |        |        |        |        |        | 10    |
| 2  | 371.28   | 186.14 |          |        |          |        | L   | 990.57 | 495.79 | 973.55 | 487.28 | 972.56 | 486.78 | 9     |
| 3  | 470.35   | 235.68 |          |        |          |        | V   | 877.49 | 439.25 | 860.46 | 430.73 | 859.48 | 430.24 | 8     |
| 4  | 541.38   | 271.20 |          |        |          |        | A   | 778.42 | 389.71 | 761.39 | 381.20 | 760.41 | 380.71 | 7     |
| 5  | 642.43   | 321.72 |          |        | 624.42   | 312.71 | T   | 707.38 | 354.20 | 690.36 | 345.68 | 689.37 | 345.19 | 6     |
| 6  | 756.47   | 378.74 | 739.45   | 370.23 | 738.46   | 369.74 | N   | 606.34 | 303.67 | 589.31 | 295.16 |        |        | 5     |
| 7  | 869.56   | 435.28 | 852.53   | 426.77 | 851.55   | 426.28 | L   | 492.29 | 246.65 | 475.27 | 238.14 |        |        | 4     |
| 8  | 1,016.63 | 508.82 | 999.60   | 500.30 | 998.62   | 499.81 | F   | 379.21 | 190.11 | 362.18 | 181.59 |        |        | 3     |
| 9  | 1,073.65 | 537.33 | 1,056.62 | 528.81 | 1,055.64 | 528.32 | G   | 232.14 | 116.57 | 215.11 | 108.06 |        |        | 2     |
| 10 |          |        |          |        |          |        | R   | 175.12 | 88.06  | 158.09 | 79.55  |        |        | 1     |

Query 884 Hit 1

MS/MS Fragmentation of **ILEFFGLK**

Found in **sp|P07237|PDIA1\_HUMAN**, Protein disulfide-isomerase OS=Homo sapiens GN=P4HB PE=1 SV=3

Match to Query 884: 1253.772 from (627.8932, 2+)

Title: 1010: Scan 2506 (rt=64.9028, f=3, i=353) [D:\lab212\membrane\Grace\20120305-iTRAQ-2.raw]

Data File:

**Monoisotopic mass of neutral peptide Mr(calc): 1253.772**

**Variable modifications:**

**K8** iTRAQ4plex (K)

**Ions Score: 42.11 Expect: 0.022**

### Mascot Matched Ions

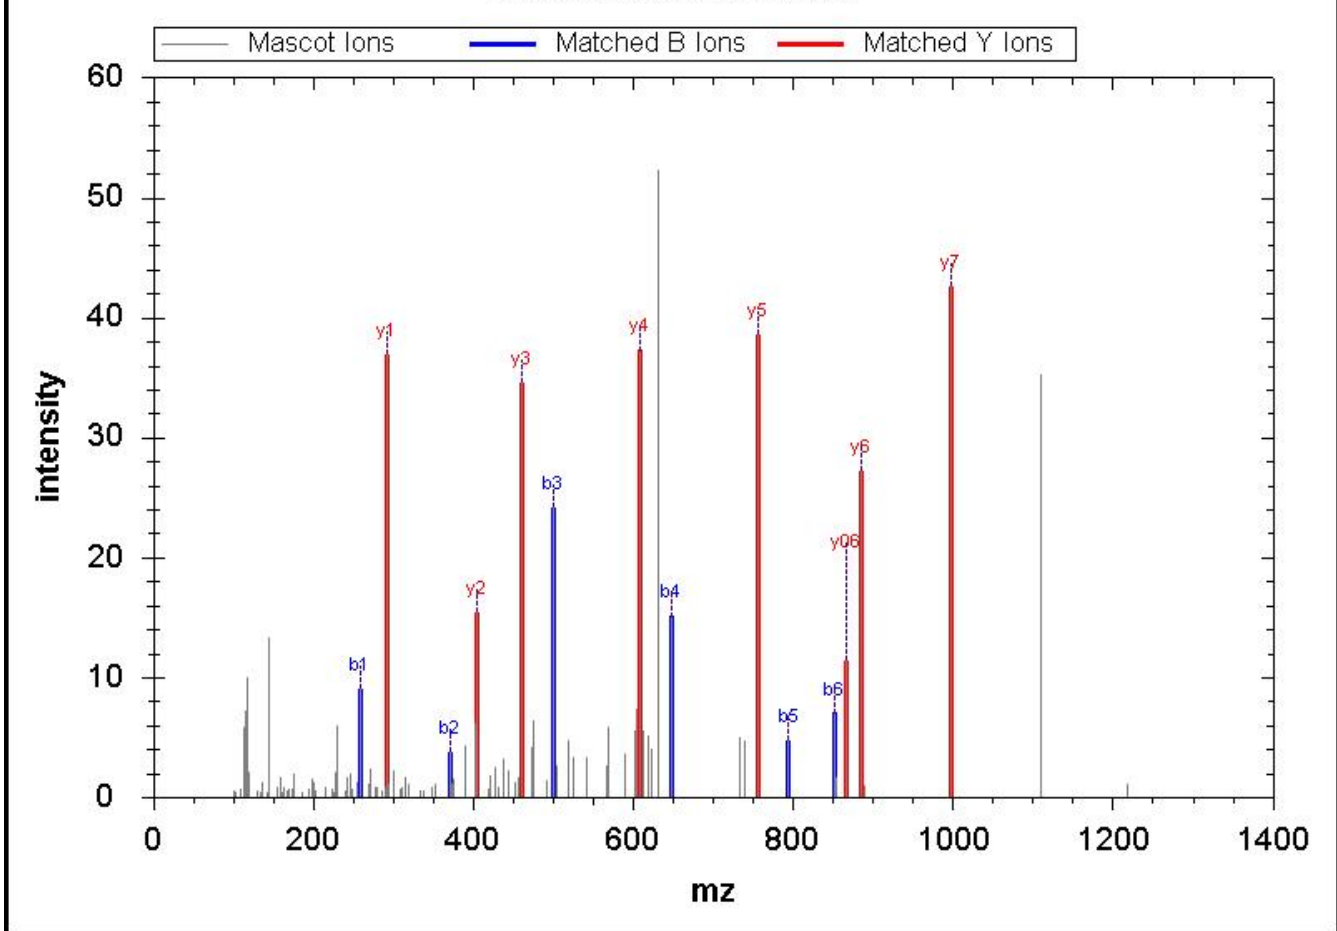

| No | b      | b++    | b0     | b0++   | Seq | y      | y++    | y*     | y*++   | y0     | y0++   | RevNo |
|----|--------|--------|--------|--------|-----|--------|--------|--------|--------|--------|--------|-------|
| 1  | 258.19 | 129.60 |        |        | I   |        |        |        |        |        |        | 8     |
| 2  | 371.28 | 186.14 |        |        | L   | 997.58 | 499.30 | 980.56 | 490.78 | 979.57 | 490.29 | 7     |
| 3  | 500.32 | 250.66 | 482.31 | 241.66 | E   | 884.50 | 442.75 | 867.47 | 434.24 | 866.49 | 433.75 | 6     |
| 4  | 647.39 | 324.20 | 629.38 | 315.19 | F   | 755.46 | 378.23 | 738.43 | 369.72 |        |        | 5     |
| 5  | 794.46 | 397.73 | 776.45 | 388.73 | F   | 608.39 | 304.70 | 591.36 | 296.18 |        |        | 4     |
| 6  | 851.48 | 426.24 | 833.47 | 417.24 | G   | 461.32 | 231.16 | 444.29 | 222.65 |        |        | 3     |
| 7  | 964.56 | 482.78 | 946.55 | 473.78 | L   | 404.30 | 202.65 | 387.27 | 194.14 |        |        | 2     |
| 8  |        |        |        |        | K   | 291.21 | 146.11 | 274.19 | 137.60 |        |        | 1     |

Query 2844 Hit 1

MS/MS Fragmentation of **LLVSNLDFGVSDADIQELFAEFGTLK**

Found in **sp|Q86V81|THOC4\_HUMAN**, THO complex subunit 4 OS=Homo sapiens GN=ALYREF PE=1 SV=3

Match to Query 2844: 3129.667from(1044.23,3+)

Title: 1307: Sum of 2 scans in range 3324 (rt=82.8877, f=4, i=930) to 3325 (rt=82.9131, f=4, i=931)

[D:\lab212\membrane\Grace\20120305-iTRAQ-1.raw]

Data File:

**Monoisotopic mass of neutral peptide Mr(calc): 3129.667**

**Variable modifications:**

**Q16** :Deamidated (NQ)

**K26** :iTRAQ4plex (K)

**Ions Score: 41.48 Expect: 0.042**

### Mascot Matched Ions

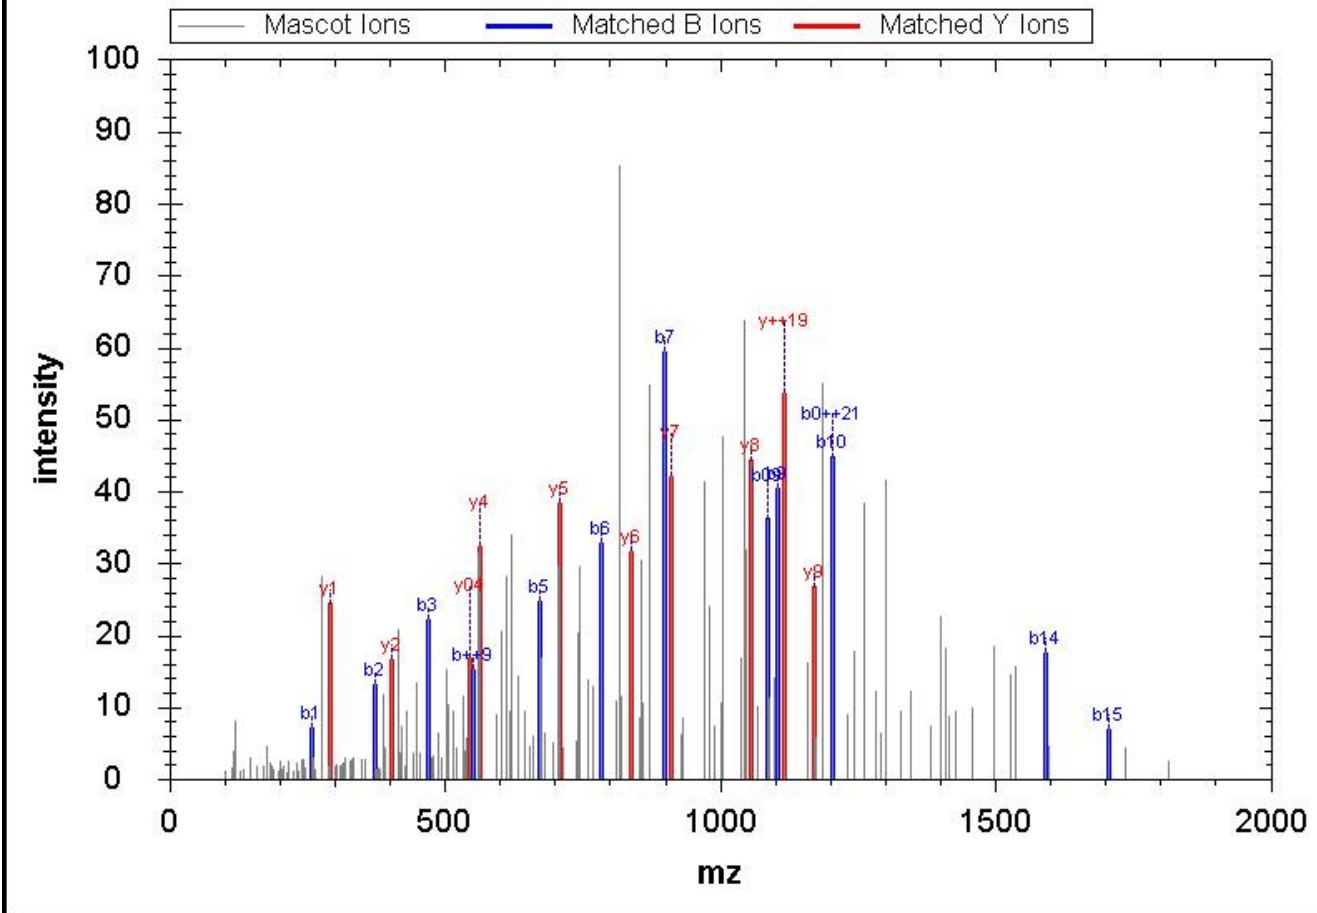

| No | b        | b++      | b*       | b***     | b0       | b0++     | Seq | y        | y++      | y*       | y***     | y0       | y0++     | RevNo |
|----|----------|----------|----------|----------|----------|----------|-----|----------|----------|----------|----------|----------|----------|-------|
| 1  | 258.19   | 129.60   |          |          |          |          | L   |          |          |          |          |          |          | 26    |
| 2  | 371.28   | 186.14   |          |          |          |          | L   | 2,873.46 | 1,437.23 | 2,856.43 | 1,428.72 | 2,855.45 | 1,428.23 | 25    |
| 3  | 470.35   | 235.68   |          |          |          |          | V   | 2,760.37 | 1,380.69 | 2,743.35 | 1,372.18 | 2,742.36 | 1,371.69 | 24    |
| 4  | 557.38   | 279.19   |          |          | 539.37   | 270.19   | S   | 2,661.30 | 1,331.16 | 2,644.28 | 1,322.64 | 2,643.29 | 1,322.15 | 23    |
| 5  | 671.42   | 336.21   | 654.39   | 327.70   | 653.41   | 327.21   | N   | 2,574.27 | 1,287.64 | 2,557.25 | 1,279.13 | 2,556.26 | 1,278.63 | 22    |
| 6  | 784.50   | 392.76   | 767.48   | 384.24   | 766.49   | 383.75   | L   | 2,460.23 | 1,230.62 | 2,443.20 | 1,222.11 | 2,442.22 | 1,221.61 | 21    |
| 7  | 899.53   | 450.27   | 882.51   | 441.76   | 881.52   | 441.26   | D   | 2,347.15 | 1,174.08 | 2,330.12 | 1,165.56 | 2,329.14 | 1,165.07 | 20    |
| 8  | 1,046.60 | 523.80   | 1,029.57 | 515.29   | 1,028.59 | 514.80   | F   | 2,232.12 | 1,116.56 | 2,215.09 | 1,108.05 | 2,214.11 | 1,107.56 | 19    |
| 9  | 1,103.62 | 552.31   | 1,086.60 | 543.80   | 1,085.61 | 543.31   | G   | 2,085.05 | 1,043.03 | 2,068.02 | 1,034.52 | 2,067.04 | 1,034.02 | 18    |
| 10 | 1,202.69 | 601.85   | 1,185.66 | 593.34   | 1,184.68 | 592.84   | V   | 2,028.03 | 1,014.52 | 2,011.00 | 1,006.01 | 2,010.02 | 1,005.51 | 17    |
| 11 | 1,289.72 | 645.36   | 1,272.70 | 636.85   | 1,271.71 | 636.36   | S   | 1,928.96 | 964.98   | 1,911.93 | 956.47   | 1,910.95 | 955.98   | 16    |
| 12 | 1,404.75 | 702.88   | 1,387.72 | 694.36   | 1,386.74 | 693.87   | D   | 1,841.93 | 921.47   | 1,824.90 | 912.95   | 1,823.92 | 912.46   | 15    |
| 13 | 1,475.79 | 738.40   | 1,458.76 | 729.88   | 1,457.78 | 729.39   | A   | 1,726.90 | 863.95   | 1,709.88 | 855.44   | 1,708.89 | 854.95   | 14    |
| 14 | 1,590.81 | 795.91   | 1,573.79 | 787.40   | 1,572.80 | 786.90   | D   | 1,655.86 | 828.44   | 1,638.84 | 819.92   | 1,637.85 | 819.43   | 13    |
| 15 | 1,703.90 | 852.45   | 1,686.87 | 843.94   | 1,685.89 | 843.45   | I   | 1,540.84 | 770.92   | 1,523.81 | 762.41   | 1,522.83 | 761.92   | 12    |
| 16 | 1,832.94 | 916.97   | 1,815.91 | 908.46   | 1,814.93 | 907.97   | Q   | 1,427.75 | 714.38   | 1,410.73 | 705.87   | 1,409.74 | 705.38   | 11    |
| 17 | 1,961.98 | 981.49   | 1,944.96 | 972.98   | 1,943.97 | 972.49   | E   | 1,298.71 | 649.86   | 1,281.68 | 641.35   | 1,280.70 | 640.85   | 10    |
| 18 | 2,075.07 | 1,038.04 | 2,058.04 | 1,029.52 | 2,057.06 | 1,029.03 | L   | 1,169.67 | 585.34   | 1,152.64 | 576.82   | 1,151.66 | 576.33   | 9     |
| 19 | 2,222.14 | 1,111.57 | 2,205.11 | 1,103.06 | 2,204.12 | 1,102.57 | F   | 1,056.58 | 528.80   | 1,039.56 | 520.28   | 1,038.57 | 519.79   | 8     |
| 20 | 2,293.17 | 1,147.09 | 2,276.15 | 1,138.58 | 2,275.16 | 1,138.08 | A   | 909.52   | 455.26   | 892.49   | 446.75   | 891.51   | 446.26   | 7     |
| 21 | 2,422.21 | 1,211.61 | 2,405.19 | 1,203.10 | 2,404.20 | 1,202.61 | E   | 838.48   | 419.74   | 821.45   | 411.23   | 820.47   | 410.74   | 6     |
| 22 | 2,569.28 | 1,285.15 | 2,552.26 | 1,276.63 | 2,551.27 | 1,276.14 | F   | 709.44   | 355.22   | 692.41   | 346.71   | 691.43   | 346.22   | 5     |
| 23 | 2,626.30 | 1,313.66 | 2,609.28 | 1,305.14 | 2,608.29 | 1,304.65 | G   | 562.37   | 281.69   | 545.34   | 273.17   | 544.36   | 272.68   | 4     |

|    |          |          |          |          |          |          |   |        |        |        |        |        |        |   |
|----|----------|----------|----------|----------|----------|----------|---|--------|--------|--------|--------|--------|--------|---|
| 24 | 2,727.35 | 1,364.18 | 2,710.33 | 1,355.67 | 2,709.34 | 1,355.17 | T | 505.35 | 253.18 | 488.32 | 244.66 | 487.34 | 244.17 | 3 |
| 25 | 2,840.44 | 1,420.72 | 2,823.41 | 1,412.21 | 2,822.43 | 1,411.72 | L | 404.30 | 202.65 | 387.27 | 194.14 |        |        | 2 |
| 26 |          |          |          |          |          |          | K | 291.21 | 146.11 | 274.19 | 137.60 |        |        | 1 |

Query 2100 Hit 1

MS/MS Fragmentation of **VQALTTDISLIFAALK**

Found in **sp|Q6PKG0|LARP1\_HUMAN**, La-related protein 1 OS=Homo sapiens GN=LARP1 PE=1 SV=2

Match to Query 2100: 1991.206from(664.7427,3+)

Title: 1354: Scan 3275 (rt=82.2301, f=3, i=477) [D:\lab212\membrane\Grace\20120305-iTRAQ-2.raw]

Data File:

**Monoisotopic mass of neutral peptide Mr(calc):** 1991.206

**Variable modifications:**

**K16** iTRAQ4plex (K)

**Ions Score:** 41.14 **Expect:** 0.017

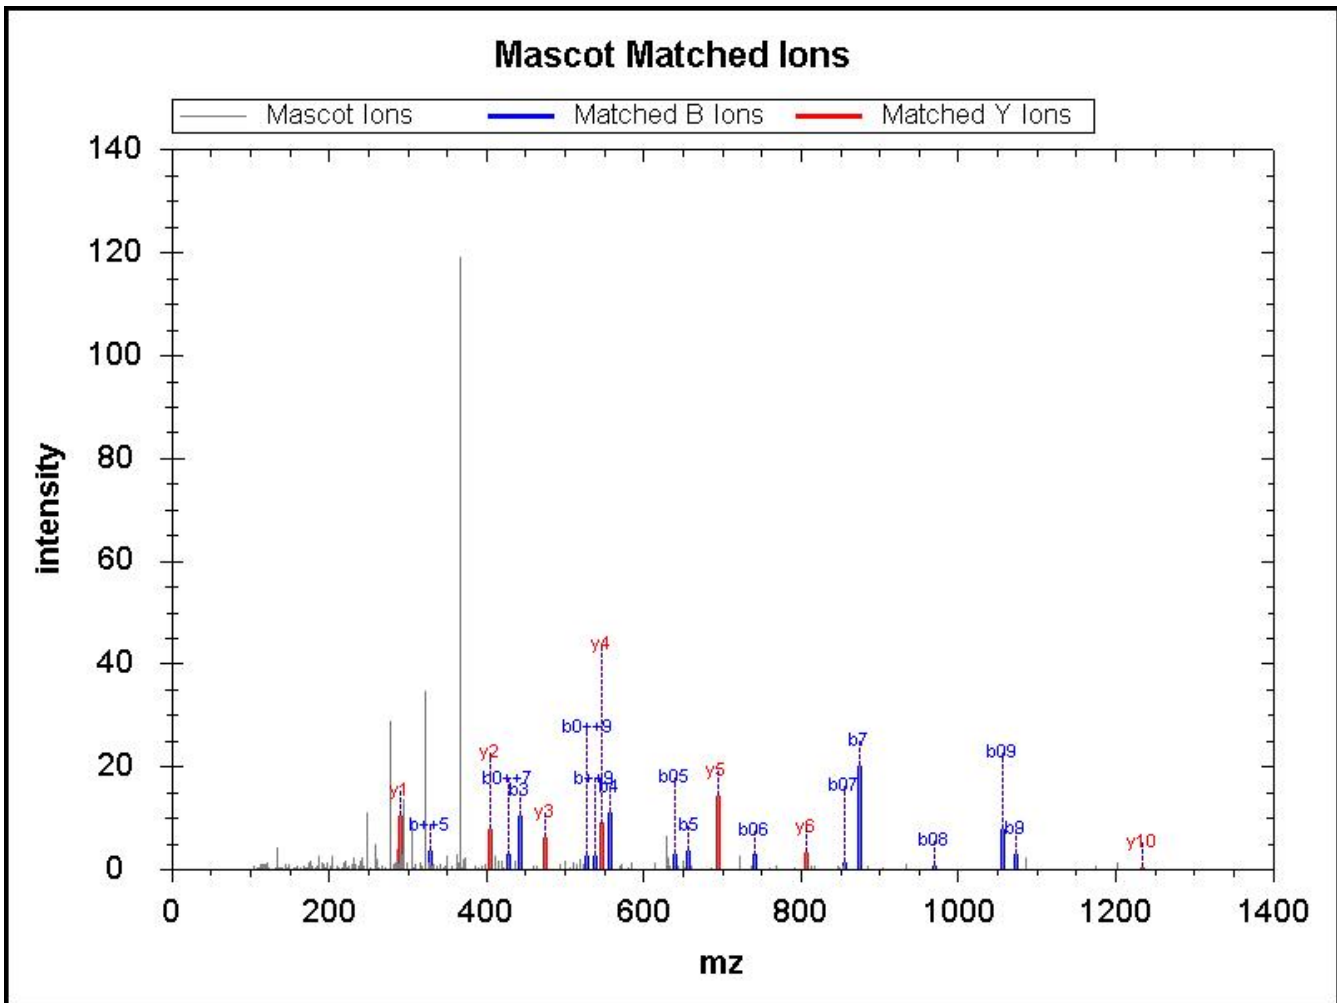

| No | b        | b++    | b*       | b*++   | b0       | b0++   | Seq | y        | y++    | y*       | y*++   | y0       | y0++   | RevNo |
|----|----------|--------|----------|--------|----------|--------|-----|----------|--------|----------|--------|----------|--------|-------|
| 1  | 244.18   | 122.59 |          |        |          |        | V   |          |        |          |        |          |        | 16    |
| 2  | 372.24   | 186.62 | 355.21   | 178.11 |          |        | Q   | 1,749.03 | 875.02 | 1,732.00 | 866.50 | 1,731.02 | 866.01 | 15    |
| 3  | 443.27   | 222.14 | 426.25   | 213.63 |          |        | A   | 1,620.97 | 810.99 | 1,603.94 | 802.48 | 1,602.96 | 801.98 | 14    |
| 4  | 556.36   | 278.68 | 539.33   | 270.17 |          |        | L   | 1,549.93 | 775.47 | 1,532.91 | 766.96 | 1,531.92 | 766.46 | 13    |
| 5  | 657.41   | 329.21 | 640.38   | 320.69 | 639.39   | 320.20 | T   | 1,436.85 | 718.93 | 1,419.82 | 710.41 | 1,418.84 | 709.92 | 12    |
| 6  | 758.45   | 379.73 | 741.43   | 371.22 | 740.44   | 370.72 | T   | 1,335.80 | 668.40 | 1,318.77 | 659.89 | 1,317.79 | 659.40 | 11    |
| 7  | 873.48   | 437.24 | 856.45   | 428.73 | 855.47   | 428.24 | D   | 1,234.75 | 617.88 | 1,217.73 | 609.37 | 1,216.74 | 608.87 | 10    |
| 8  | 986.56   | 493.79 | 969.54   | 485.27 | 968.55   | 484.78 | I   | 1,119.73 | 560.37 | 1,102.70 | 551.85 | 1,101.72 | 551.36 | 9     |
| 9  | 1,073.60 | 537.30 | 1,056.57 | 528.79 | 1,055.59 | 528.30 | S   | 1,006.64 | 503.82 | 989.62   | 495.31 | 988.63   | 494.82 | 8     |
| 10 | 1,186.68 | 593.84 | 1,169.65 | 585.33 | 1,168.67 | 584.84 | L   | 919.61   | 460.31 | 902.58   | 451.80 |          |        | 7     |
| 11 | 1,299.76 | 650.39 | 1,282.74 | 641.87 | 1,281.75 | 641.38 | I   | 806.53   | 403.77 | 789.50   | 395.25 |          |        | 6     |

|    |          |        |          |        |          |        |   |        |        |        |        |  |  |   |
|----|----------|--------|----------|--------|----------|--------|---|--------|--------|--------|--------|--|--|---|
| 12 | 1,446.83 | 723.92 | 1,429.81 | 715.41 | 1,428.82 | 714.91 | F | 693.44 | 347.22 | 676.41 | 338.71 |  |  | 5 |
| 13 | 1,517.87 | 759.44 | 1,500.84 | 750.93 | 1,499.86 | 750.43 | A | 546.37 | 273.69 | 529.35 | 265.18 |  |  | 4 |
| 14 | 1,588.91 | 794.96 | 1,571.88 | 786.44 | 1,570.90 | 785.95 | A | 475.34 | 238.17 | 458.31 | 229.66 |  |  | 3 |
| 15 | 1,701.99 | 851.50 | 1,684.96 | 842.99 | 1,683.98 | 842.49 | L | 404.30 | 202.65 | 387.27 | 194.14 |  |  | 2 |
| 16 |          |        |          |        |          |        | K | 291.21 | 146.11 | 274.19 | 137.60 |  |  | 1 |

Query 2214 Hit 1

MS/MS Fragmentation of **LTGDLSHLAAIVILLK**

Found in **sp|P33947|ERD22\_HUMAN**, ER lumen protein retaining receptor 2 OS=Homo sapiens GN=KDEL2 PE=1 SV=1  
Match to Query 2214: 2077.323from(693.4484,3+)

Title: 1421: Scan 3553 (rt=88.4912, f=2, i=548) [D:\lab212\membrane\Grace\20120305-iTRAQ-2.raw]

Data File:

**Monoisotopic mass of neutral peptide Mr(calc): 2077.323**

**Variable modifications:**

**K17** iTRAQ4plex (K)

**Ions Score: 40.95 Expect: 0.004**

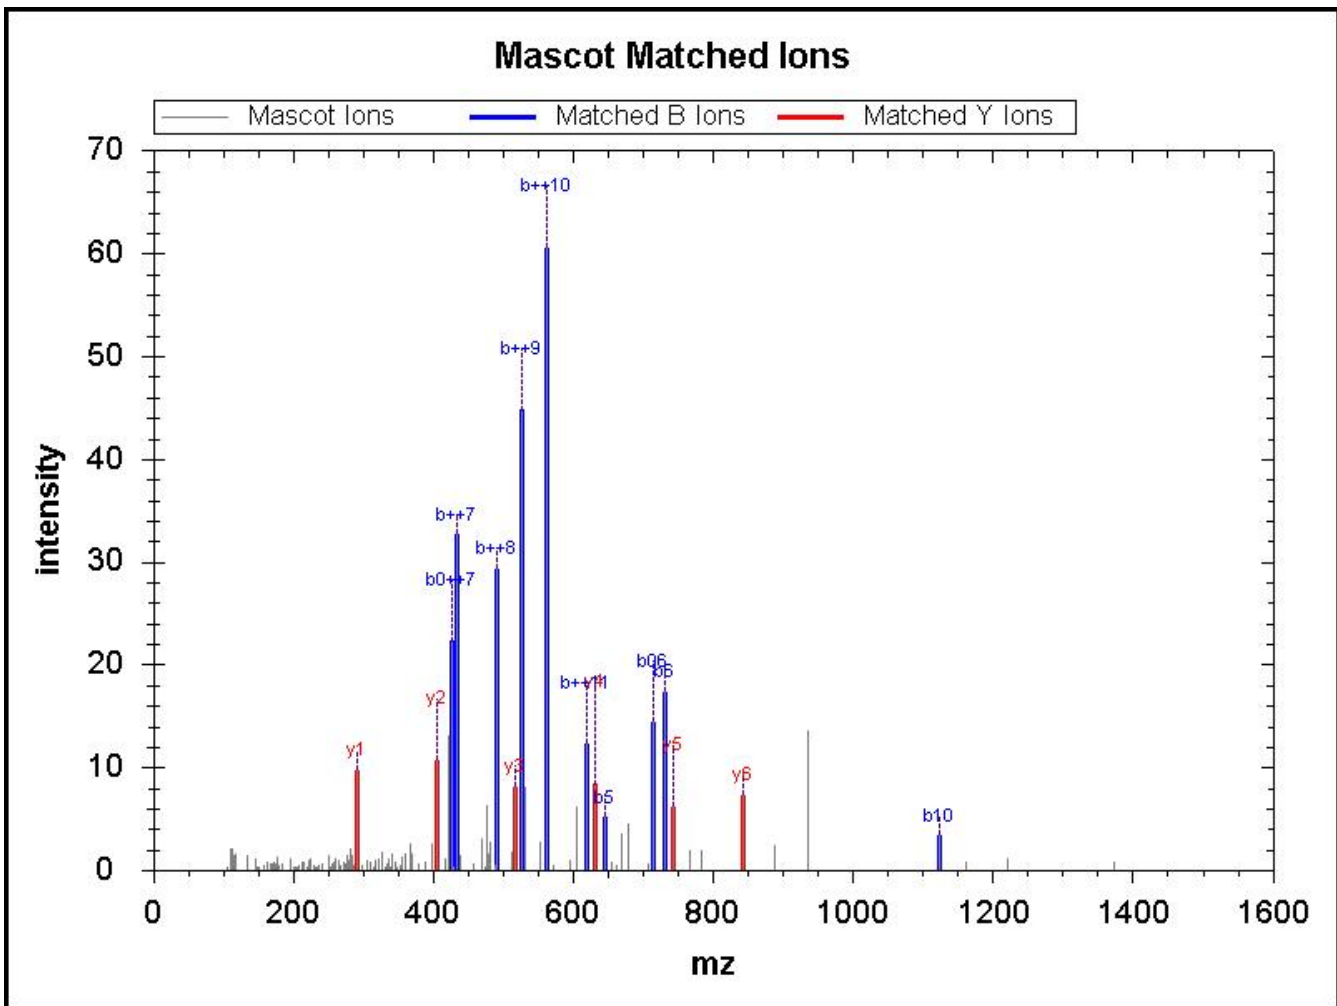

| No | b        | b++    | b0       | b0++   | Seq | y        | y++    | y*       | y*++   | y0       | y0++   | RevNo |
|----|----------|--------|----------|--------|-----|----------|--------|----------|--------|----------|--------|-------|
| 1  | 258.19   | 129.60 |          |        | L   |          |        |          |        |          |        | 17    |
| 2  | 359.24   | 180.12 | 341.23   | 171.12 | T   | 1,821.13 | 911.07 | 1,804.11 | 902.56 | 1,803.12 | 902.06 | 16    |
| 3  | 416.26   | 208.63 | 398.25   | 199.63 | G   | 1,720.09 | 860.55 | 1,703.06 | 852.03 | 1,702.07 | 851.54 | 15    |
| 4  | 531.29   | 266.15 | 513.28   | 257.14 | D   | 1,663.06 | 832.04 | 1,646.04 | 823.52 | 1,645.05 | 823.03 | 14    |
| 5  | 644.37   | 322.69 | 626.36   | 313.69 | L   | 1,548.04 | 774.52 | 1,531.01 | 766.01 | 1,530.03 | 765.52 | 13    |
| 6  | 731.41   | 366.21 | 713.39   | 357.20 | S   | 1,434.95 | 717.98 | 1,417.93 | 709.47 | 1,416.94 | 708.97 | 12    |
| 7  | 868.46   | 434.74 | 850.45   | 425.73 | H   | 1,347.92 | 674.46 | 1,330.89 | 665.95 |          |        | 11    |
| 8  | 981.55   | 491.28 | 963.54   | 482.27 | L   | 1,210.86 | 605.93 | 1,193.84 | 597.42 |          |        | 10    |
| 9  | 1,052.59 | 526.80 | 1,034.58 | 517.79 | A   | 1,097.78 | 549.39 | 1,080.75 | 540.88 |          |        | 9     |



|    |          |        |          |        |   |          |        |          |        |  |  |   |
|----|----------|--------|----------|--------|---|----------|--------|----------|--------|--|--|---|
| 10 | 1,123.62 | 562.32 | 1,105.61 | 553.31 | A | 1,026.74 | 513.87 | 1,009.71 | 505.36 |  |  | 8 |
| 11 | 1,236.71 | 618.86 | 1,218.70 | 609.85 | I | 955.70   | 478.36 | 938.68   | 469.84 |  |  | 7 |
| 12 | 1,335.78 | 668.39 | 1,317.76 | 659.39 | V | 842.62   | 421.81 | 825.59   | 413.30 |  |  | 6 |
| 13 | 1,448.86 | 724.93 | 1,430.85 | 715.93 | I | 743.55   | 372.28 | 726.52   | 363.77 |  |  | 5 |
| 14 | 1,561.94 | 781.48 | 1,543.93 | 772.47 | L | 630.47   | 315.74 | 613.44   | 307.22 |  |  | 4 |
| 15 | 1,675.03 | 838.02 | 1,657.02 | 829.01 | L | 517.38   | 259.20 | 500.36   | 250.68 |  |  | 3 |
| 16 | 1,788.11 | 894.56 | 1,770.10 | 885.55 | L | 404.30   | 202.65 | 387.27   | 194.14 |  |  | 2 |
| 17 |          |        |          |        | K | 291.21   | 146.11 | 274.19   | 137.60 |  |  | 1 |

Query 841 Hit 1

MS/MS Fragmentation of **NLYIISVK**

Found in **sp|P62829|RL23\_HUMAN**, 60S ribosomal protein L23 OS=Homo sapiens GN=RPL23 PE=1 SV=1

Match to Query 841: 1236.768from(619.3913,2+)

Title: 612: Sum of 2 scans in range 1651 (rt=45.6413, f=4, i=424) to 1652 (rt=45.6667, f=4, i=425)

[D:\lab212\membrane\Grace\20120305-iTRAQ-2.raw]

Data File:

**Monoisotopic mass of neutral peptide Mr(calc):** 1236.768

**Variable modifications:**

**K8** iTRAQ4plex (K)

**Ions Score:** 40.33 **Expect:** 0.038

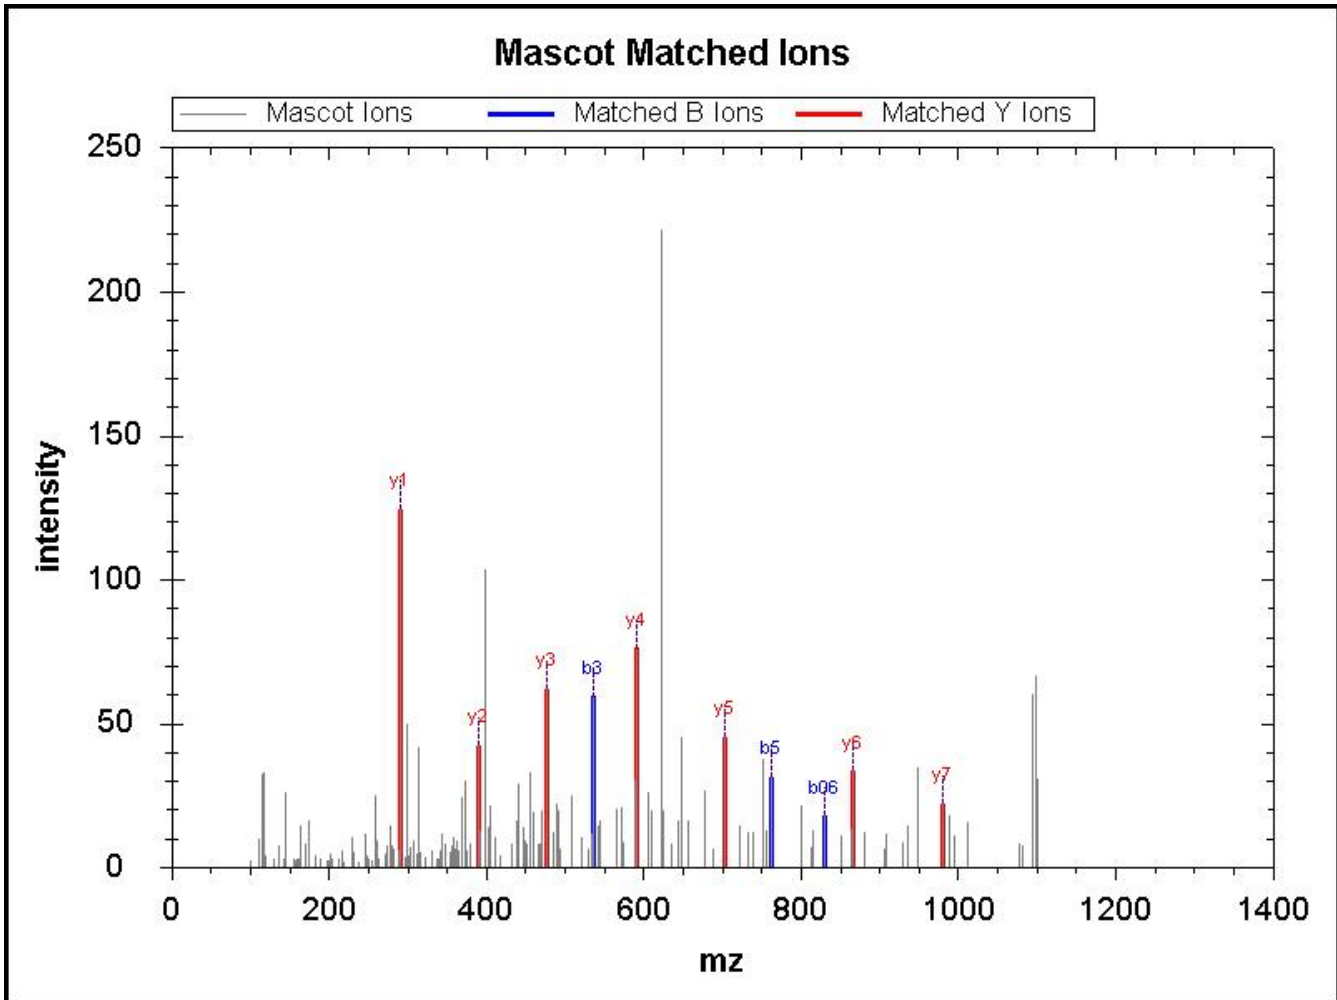

| No | b      | b++    | b*     | b***   | b0 | b0++ | Seq | y      | y++    | y*     | y***   | y0     | y0++   | RevNo |
|----|--------|--------|--------|--------|----|------|-----|--------|--------|--------|--------|--------|--------|-------|
| 1  | 259.15 | 130.08 | 242.13 | 121.57 |    |      | N   |        |        |        |        |        |        | 8     |
| 2  | 372.24 | 186.62 | 355.21 | 178.11 |    |      | L   | 979.63 | 490.32 | 962.60 | 481.81 | 961.62 | 481.31 | 7     |
| 3  | 535.30 | 268.15 | 518.27 | 259.64 |    |      | Y   | 866.55 | 433.78 | 849.52 | 425.26 | 848.54 | 424.77 | 6     |
| 4  | 648.38 | 324.70 | 631.36 | 316.18 |    |      | I   | 703.48 | 352.25 | 686.46 | 343.73 | 685.47 | 343.24 | 5     |
| 5  | 761.47 | 381.24 | 744.44 | 372.72 |    |      | I   | 590.40 | 295.70 | 573.37 | 287.19 | 572.39 | 286.70 | 4     |

|   |        |        |        |        |        |        |   |        |        |        |        |        |        |   |
|---|--------|--------|--------|--------|--------|--------|---|--------|--------|--------|--------|--------|--------|---|
| 6 | 848.50 | 424.75 | 831.47 | 416.24 | 830.49 | 415.75 | S | 477.32 | 239.16 | 460.29 | 230.65 | 459.30 | 230.16 | 3 |
| 7 | 947.57 | 474.29 | 930.54 | 465.77 | 929.56 | 465.28 | V | 390.28 | 195.65 | 373.26 | 187.13 |        |        | 2 |
| 8 |        |        |        |        |        |        | K | 291.21 | 146.11 | 274.19 | 137.60 |        |        | 1 |

Query 1167 Hit 1

MS/MS Fragmentation of **FLILPDMLK**

Found in **sp|P62318|SMD3\_HUMAN**, Small nuclear ribonucleoprotein Sm D3 OS=Homo sapiens GN=SNRPD3 PE=1 SV=1

Match to Query 1167: 1376.843 from (689.4288, 2+)

Title: 980: Sum of 2 scans in range 2439 (rt=63.3954, f=4, i=678) to 2440 (rt=63.4208, f=4, i=679)

[D:\lab212\membrane\Grace\20120305-iTRAQ-2.raw]

Data File:

**Monoisotopic mass of neutral peptide Mr(calc):** 1376.843

**Variable modifications:**

**K9** iTRAQ4plex (K)

**Ions Score:** 39.56 **Expect:** 0.054

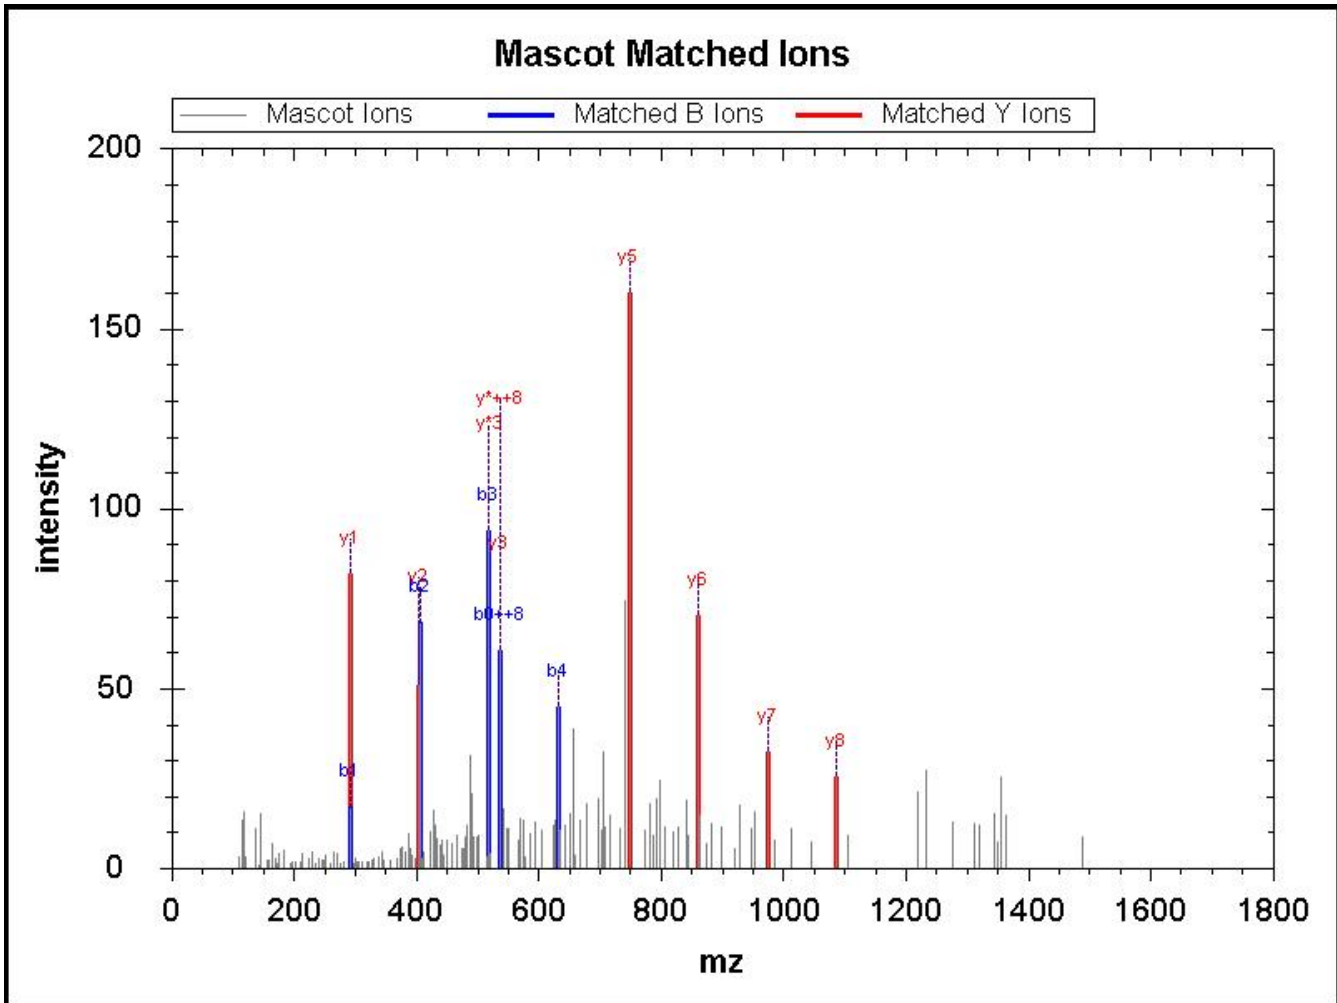

| No | b        | b++    | b0       | b0++   | Seq | y        | y++    | y*       | y*++   | y0       | y0++   | RevNo |
|----|----------|--------|----------|--------|-----|----------|--------|----------|--------|----------|--------|-------|
| 1  | 292.18   | 146.59 |          |        | F   |          |        |          |        |          |        | 9     |
| 2  | 405.26   | 203.13 |          |        | L   | 1,086.67 | 543.84 | 1,069.64 | 535.33 | 1,068.66 | 534.83 | 8     |
| 3  | 518.35   | 259.68 |          |        | I   | 973.59   | 487.30 | 956.56   | 478.78 | 955.58   | 478.29 | 7     |
| 4  | 631.43   | 316.22 |          |        | L   | 860.50   | 430.76 | 843.48   | 422.24 | 842.49   | 421.75 | 6     |
| 5  | 728.48   | 364.74 |          |        | P   | 747.42   | 374.21 | 730.39   | 365.70 | 729.41   | 365.21 | 5     |
| 6  | 843.51   | 422.26 | 825.50   | 413.25 | D   | 650.37   | 325.69 | 633.34   | 317.17 | 632.36   | 316.68 | 4     |
| 7  | 974.55   | 487.78 | 956.54   | 478.77 | M   | 535.34   | 268.17 | 518.31   | 259.66 |          |        | 3     |
| 8  | 1,087.63 | 544.32 | 1,069.62 | 535.32 | L   | 404.30   | 202.65 | 387.27   | 194.14 |          |        | 2     |
| 9  |          |        |          |        | K   | 291.21   | 146.11 | 274.19   | 137.60 |          |        | 1     |

Query 1029 Hit 1

MS/MS Fragmentation of **LYLILDFLR**

Found in **sp|Q15418|KS6A1\_HUMAN**, Ribosomal protein S6 kinase alpha-1 OS=Homo sapiens GN=RPS6KA1 PE=1 SV=2  
 Match to Query 1029: 1308.797from(655.4058,2+)

Title: 1208: Scan 3087 (rt=77.5454, f=3, i=436) [D:\lab212\membrane\Grace\20120305-iTRAQ-1.raw]

Data File:

**Monoisotopic mass of neutral peptide Mr(calc):** 1308.797

**Variable modifications:**

**Ions Score:** 39.55 **Expect:** 0.049

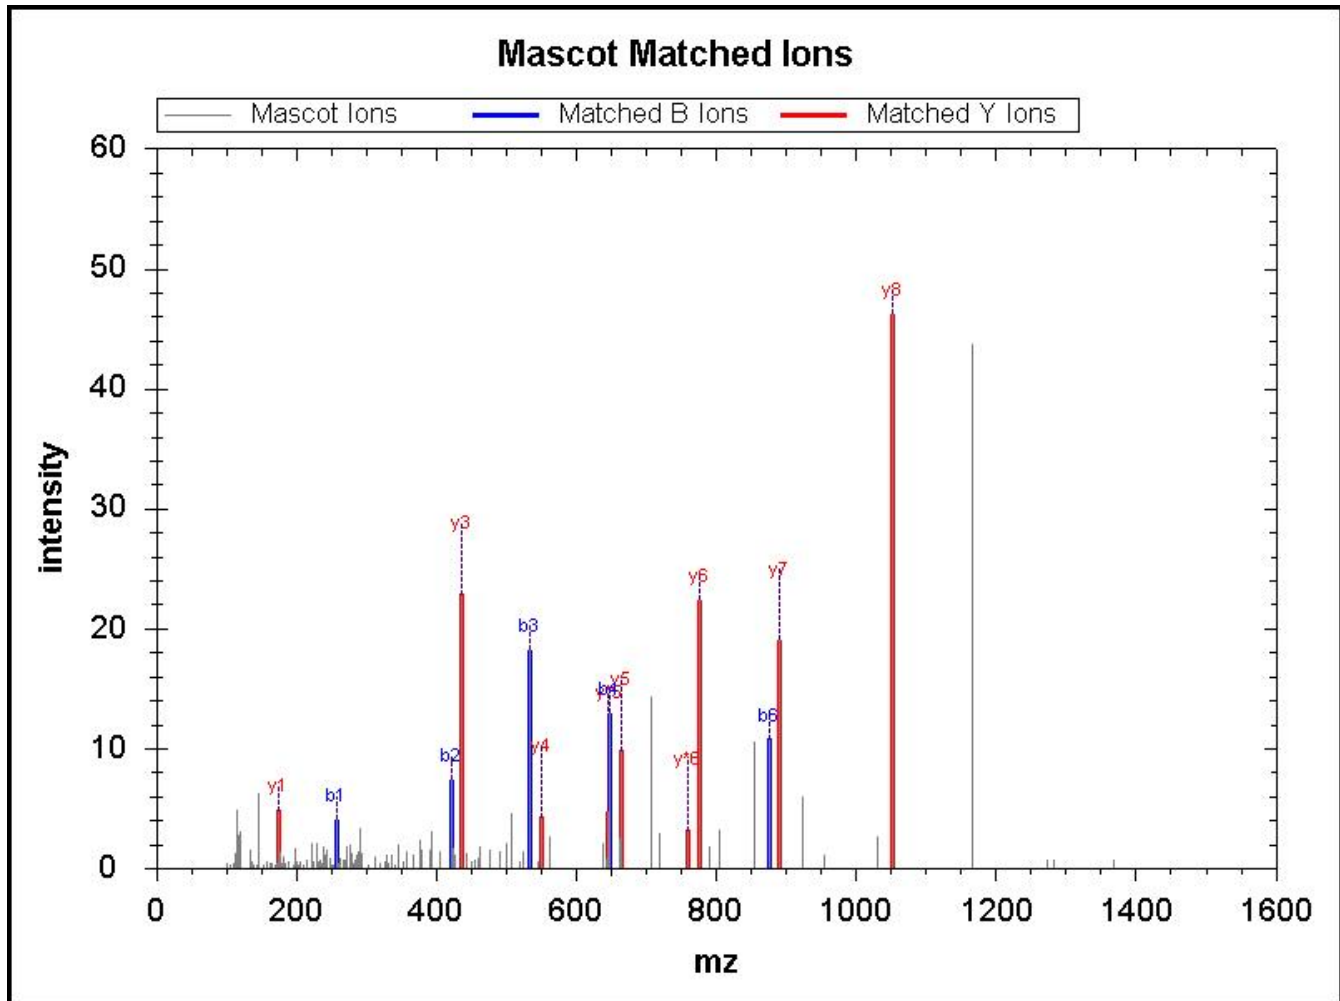

| No | b             | b++    | b0       | b0++   | Seq | y               | y++    | y*            | y*++   | y0       | y0++   | RevNo |
|----|---------------|--------|----------|--------|-----|-----------------|--------|---------------|--------|----------|--------|-------|
| 1  | <b>258.19</b> | 129.60 |          |        | L   |                 |        |               |        |          |        | 9     |
| 2  | <b>421.26</b> | 211.13 |          |        | Y   | <b>1,052.61</b> | 526.81 | 1,035.59      | 518.30 | 1,034.60 | 517.81 | 8     |
| 3  | <b>534.34</b> | 267.67 |          |        | L   | <b>889.55</b>   | 445.28 | 872.52        | 436.77 | 871.54   | 436.27 | 7     |
| 4  | <b>647.42</b> | 324.22 |          |        | I   | <b>776.47</b>   | 388.74 | <b>759.44</b> | 380.22 | 758.46   | 379.73 | 6     |
| 5  | 760.51        | 380.76 |          |        | L   | <b>663.38</b>   | 332.19 | <b>646.36</b> | 323.68 | 645.37   | 323.19 | 5     |
| 6  | <b>875.54</b> | 438.27 | 857.53   | 429.27 | D   | <b>550.30</b>   | 275.65 | 533.27        | 267.14 | 532.29   | 266.65 | 4     |
| 7  | 1,022.60      | 511.81 | 1,004.59 | 502.80 | F   | <b>435.27</b>   | 218.14 | 418.24        | 209.63 |          |        | 3     |
| 8  | 1,135.69      | 568.35 | 1,117.68 | 559.34 | L   | 288.20          | 144.61 | 271.18        | 136.09 |          |        | 2     |
| 9  |               |        |          |        | R   | <b>175.12</b>   | 88.06  | 158.09        | 79.55  |          |        | 1     |

Query 329 Hit 1

MS/MS Fragmentation of **LLLFLK**

Found in **sp|Q7L1Q6|BZW1\_HUMAN**, Basic leucine zipper and W2 domain-containing protein 1 OS=Homo sapiens GN=BZW1 PE=1 SV=1

Match to Query 329: 1033.72from(517.8672,2+)

Title: 904: Sum of 2 scans in range 2271 (rt=59.6117, f=4, i=624) to 2272 (rt=59.6371, f=4, i=625)

[D:\lab212\membrane\Grace\20120305-iTRAQ-2.raw]

Data File:

**Monoisotopic mass of neutral peptide Mr(calc):** 1033.72

**Variable modifications:**

**K6** iTRAQ4plex (K)

**Ions Score:** 37.61 **Expect:** 0.034

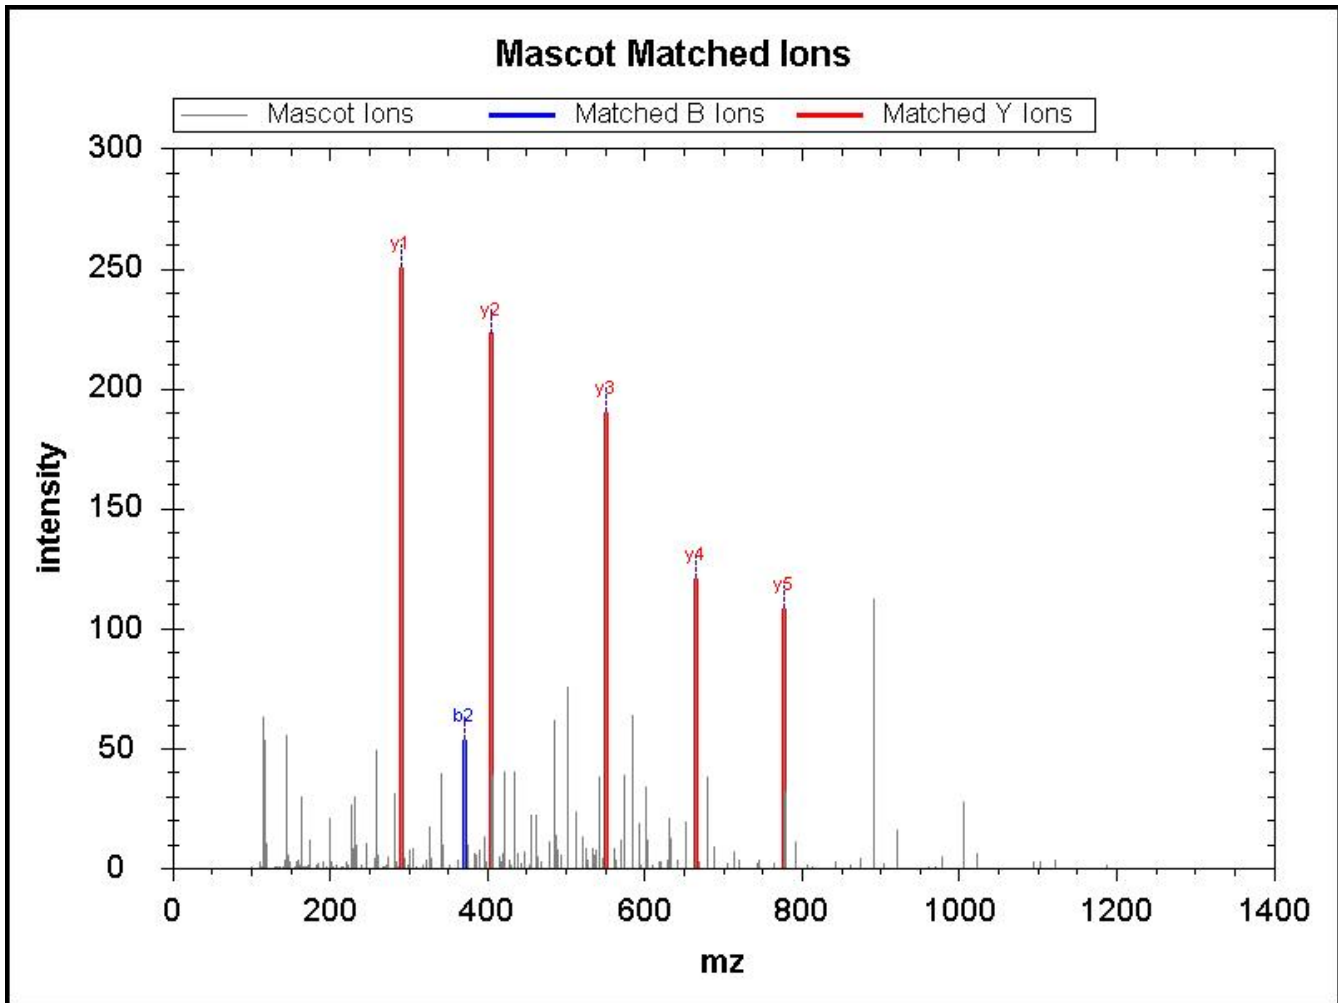

| No | b      | b++    | Seq | y      | y++    | y*     | y*++   | RevNo |
|----|--------|--------|-----|--------|--------|--------|--------|-------|
| 1  | 258.19 | 129.60 | L   |        |        |        |        | 6     |
| 2  | 371.28 | 186.14 | L   | 777.54 | 389.27 | 760.51 | 380.76 | 5     |
| 3  | 484.36 | 242.68 | L   | 664.45 | 332.73 | 647.42 | 324.22 | 4     |
| 4  | 631.43 | 316.22 | F   | 551.37 | 276.19 | 534.34 | 267.67 | 3     |
| 5  | 744.51 | 372.76 | L   | 404.30 | 202.65 | 387.27 | 194.14 | 2     |
| 6  |        |        | K   | 291.21 | 146.11 | 274.19 | 137.60 | 1     |

Query 1143 Hit 1

MS/MS Fragmentation of **LLGLLFLLAR**

Found in **sp|Q8TEX9|IPO4\_HUMAN**, Importin-4 OS=Homo sapiens GN=IPO4 PE=1 SV=2

Match to Query 1143: 1368.897from(685.4559,2+)

Title: 1371: Sum of 2 scans in range 3332 (rt=83.5168, f=4, i=966) to 3333 (rt=83.5422, f=4, i=967)

[D:\lab212\membrane\Grace\20120305-iTRAQ-2.raw]

Data File:

**Monoisotopic mass of neutral peptide Mr(calc):** 1368.897

**Variable modifications:**

**Ions Score:** 36.01 **Expect:** 0.035

### Mascot Matched Ions

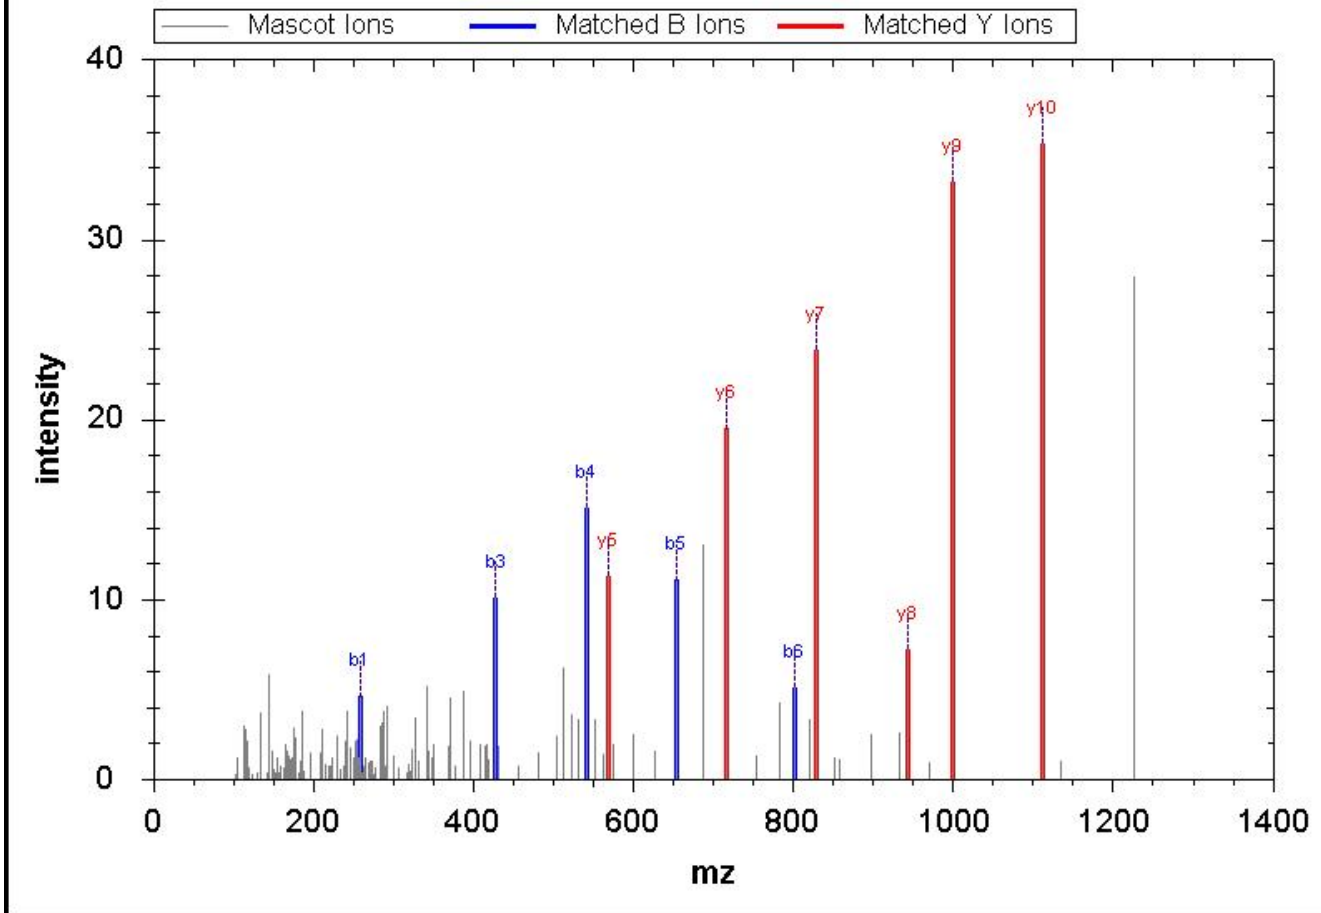

| No | b        | b++    | Seq | y        | y++    | y*       | y*++   | RevNo |
|----|----------|--------|-----|----------|--------|----------|--------|-------|
| 1  | 258.19   | 129.60 | L   |          |        |          |        | 11    |
| 2  | 371.28   | 186.14 | L   | 1,112.72 | 556.86 | 1,095.69 | 548.35 | 10    |
| 3  | 428.30   | 214.65 | G   | 999.63   | 500.32 | 982.61   | 491.81 | 9     |
| 4  | 541.38   | 271.20 | L   | 942.61   | 471.81 | 925.59   | 463.30 | 8     |
| 5  | 654.47   | 327.74 | L   | 829.53   | 415.27 | 812.50   | 406.76 | 7     |
| 6  | 801.54   | 401.27 | F   | 716.45   | 358.73 | 699.42   | 350.21 | 6     |
| 7  | 898.59   | 449.80 | P   | 569.38   | 285.19 | 552.35   | 276.68 | 5     |
| 8  | 1,011.67 | 506.34 | L   | 472.32   | 236.67 | 455.30   | 228.15 | 4     |
| 9  | 1,124.76 | 562.88 | L   | 359.24   | 180.12 | 342.21   | 171.61 | 3     |
| 10 | 1,195.79 | 598.40 | A   | 246.16   | 123.58 | 229.13   | 115.07 | 2     |
| 11 |          |        | R   | 175.12   | 88.06  | 158.09   | 79.55  | 1     |
