# Supplementary material for: Quantitative Proteomic Analysis of Human Lung Tumor Xenografts Treated with the Ectopic ATP Synthase Inhibitor Citreoviridin
Source: PubMed Central journal article supplement (PMC3749231; doi:10.1371/journal.pone.0070642), 2013-08-21
Supplement: pone.0070642.s020.pdf [file pone.0070642.s020.pdf]

Spectra S3: The information of single-peptide-based protein identifications in the large-scale experiment (part 1).

Query 63537 Hit 1

MS/MS Fragmentation of **KLELQVESMLSEIK**

Found in **sp|Q96CV9|OPTN\_HUMAN**, Optineurin OS=Homo sapiens GN=OPTN PE=1 SV=2

Match to Query 63537: 2078.208from(693.7432,3+)

Title: 975: Sum of 2 scans in range 2104 (rt=57.0943, f=4, i=655) to 2105 (rt=57.1198, f=4, i=656)

[D:\lab212\membrane\Grace\Joyce\iTRAQ\_45\_1.raw]

Data File: Submitted from 20120508-1(merge) by Mascot Daemon on JOYCE-VAIO

Monoisotopic mass of neutral peptide Mr(calc): 2078.208

Variable modifications:

K1 :iTRAQ4plex (K)

K14 :iTRAQ4plex (K)

Ions Score: 45.39 Expect: 0.011

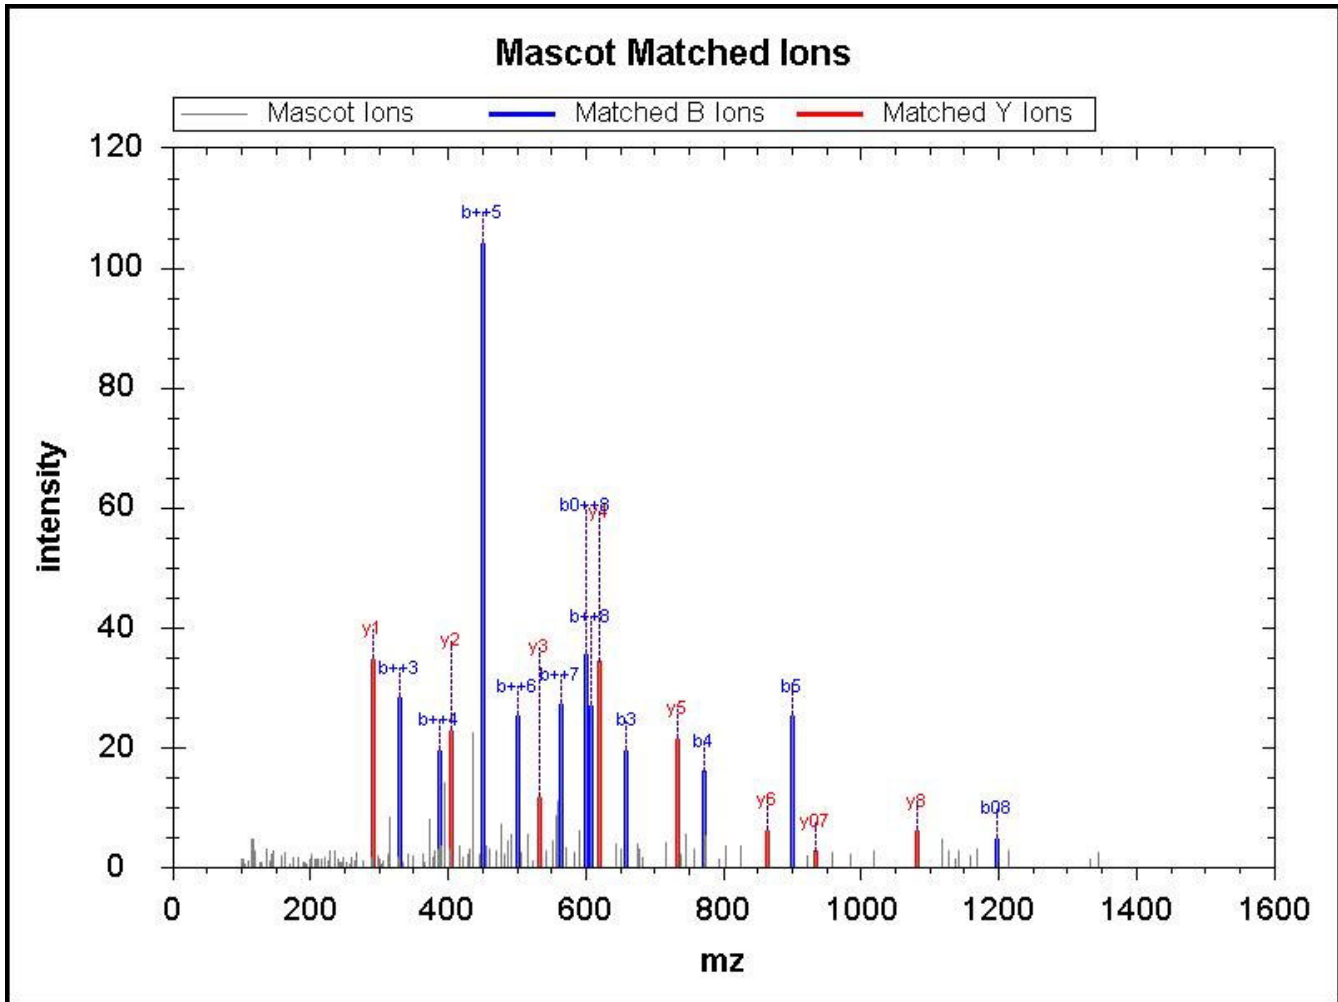

| No | b        | b++    | b*       | b*++   | b0       | b0++   | Seq | y        | y++    | y*       | y*++   | y0       | y0++   | RevNo |
|----|----------|--------|----------|--------|----------|--------|-----|----------|--------|----------|--------|----------|--------|-------|
| 1  | 417.31   | 209.16 | 400.28   | 200.64 |          |        | K   |          |        |          |        |          |        | 14    |
| 2  | 530.39   | 265.70 | 513.36   | 257.19 |          |        | L   | 1,662.91 | 831.96 | 1,645.88 | 823.45 | 1,644.90 | 822.95 | 13    |
| 3  | 659.43   | 330.22 | 642.41   | 321.71 | 641.42   | 321.21 | E   | 1,549.83 | 775.42 | 1,532.80 | 766.90 | 1,531.82 | 766.41 | 12    |
| 4  | 772.52   | 386.76 | 755.49   | 378.25 | 754.51   | 377.76 | L   | 1,420.78 | 710.90 | 1,403.76 | 702.38 | 1,402.77 | 701.89 | 11    |
| 5  | 900.58   | 450.79 | 883.55   | 442.28 | 882.57   | 441.79 | Q   | 1,307.70 | 654.35 | 1,290.67 | 645.84 | 1,289.69 | 645.35 | 10    |
| 6  | 999.64   | 500.33 | 982.62   | 491.81 | 981.63   | 491.32 | V   | 1,179.64 | 590.32 | 1,162.61 | 581.81 | 1,161.63 | 581.32 | 9     |
| 7  | 1,128.69 | 564.85 | 1,111.66 | 556.33 | 1,110.68 | 555.84 | E   | 1,080.57 | 540.79 | 1,063.55 | 532.28 | 1,062.56 | 531.78 | 8     |
| 8  | 1,215.72 | 608.36 | 1,198.69 | 599.85 | 1,197.71 | 599.36 | S   | 951.53   | 476.27 | 934.50   | 467.76 | 933.52   | 467.26 | 7     |
| 9  | 1,346.76 | 673.88 | 1,329.73 | 665.37 | 1,328.75 | 664.88 | M   | 864.50   | 432.75 | 847.47   | 424.24 | 846.49   | 423.75 | 6     |
| 10 | 1,459.84 | 730.43 | 1,442.82 | 721.91 | 1,441.83 | 721.42 | L   | 733.46   | 367.23 | 716.43   | 358.72 | 715.45   | 358.23 | 5     |
| 11 | 1,546.88 | 773.94 | 1,529.85 | 765.43 | 1,528.86 | 764.94 | S   | 620.37   | 310.69 | 603.35   | 302.18 | 602.36   | 301.69 | 4     |
| 12 | 1,675.92 | 838.46 | 1,658.89 | 829.95 | 1,657.91 | 829.46 | E   | 533.34   | 267.17 | 516.31   | 258.66 | 515.33   | 258.17 | 3     |
| 13 | 1,789.00 | 895.00 | 1,771.98 | 886.49 | 1,770.99 | 886.00 | I   | 404.30   | 202.65 | 387.27   | 194.14 |          |        | 2     |

|    |  |  |  |  |  |   |        |        |        |        |  |  |  |   |
|----|--|--|--|--|--|---|--------|--------|--------|--------|--|--|--|---|
| 14 |  |  |  |  |  | K | 291.21 | 146.11 | 274.19 | 137.60 |  |  |  | 1 |
|----|--|--|--|--|--|---|--------|--------|--------|--------|--|--|--|---|

Query 88653 Hit 1

MS/MS Fragmentation of **EERPLFPQILSSIELLQHSLPK**

Found in **sp|P04049|RAF1\_HUMAN**, RAF proto-oncogene serine/threonine-protein kinase OS=Homo sapiens GN=RAF1 PE=1 SV=1

Match to Query 88653: 2861.626from(716.4138,4+)

Title: 1214: Sum of 2 scans in range 2640 (rt=69.0675, f=4, i=801) to 2641 (rt=69.0929, f=4, i=802)

[D:\lab212\membrane\GraceJoyce\iTRAQ\_45\_2.raw]

Data File: Submitted from 20120508-1(merge) by Mascot Daemon on JOYCE-VAIO

Monoisotopic mass of neutral peptide Mr(calc): 2861.626

Variable modifications:

K22 :iTRAQ4plex (K)

Ions Score: 45.36 Expect: 0.007

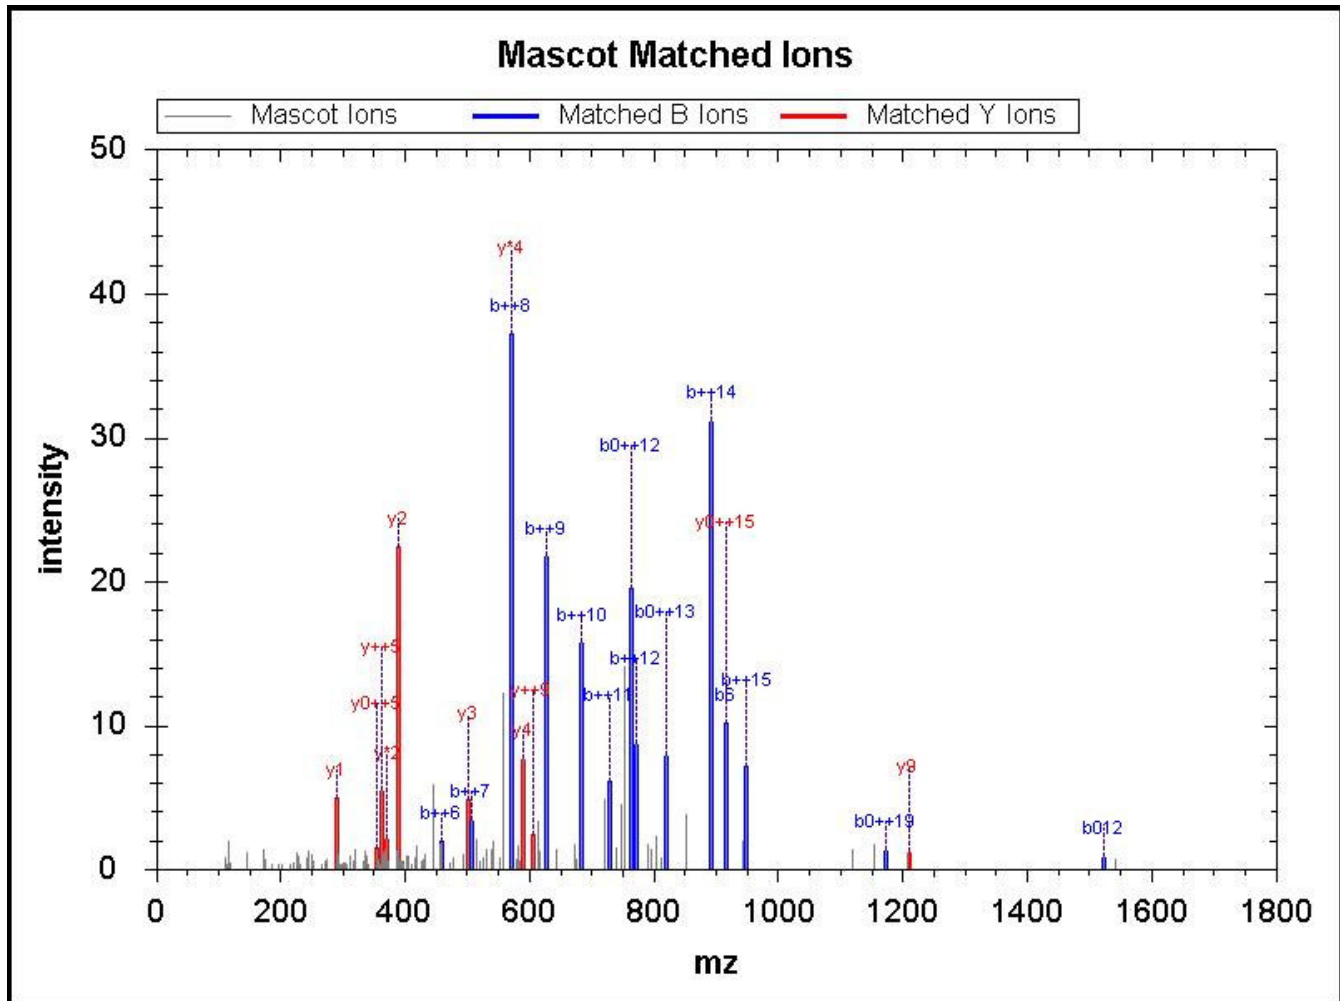

| No | b        | b++    | b*       | b*++   | b0       | b0++   | Seq | y        | y++      | y*       | y*++     | y0       | y0++     | RevNo |
|----|----------|--------|----------|--------|----------|--------|-----|----------|----------|----------|----------|----------|----------|-------|
| 1  | 274.15   | 137.58 |          |        | 256.14   | 128.57 | E   |          |          |          |          |          |          | 22    |
| 2  | 403.19   | 202.10 |          |        | 385.18   | 193.10 | E   | 2,589.49 | 1,295.25 | 2,572.46 | 1,286.73 | 2,571.48 | 1,286.24 | 21    |
| 3  | 559.30   | 280.15 | 542.27   | 271.64 | 541.29   | 271.15 | R   | 2,460.45 | 1,230.73 | 2,443.42 | 1,222.21 | 2,442.44 | 1,221.72 | 20    |
| 4  | 656.35   | 328.68 | 639.32   | 320.16 | 638.34   | 319.67 | P   | 2,304.34 | 1,152.68 | 2,287.32 | 1,144.16 | 2,286.33 | 1,143.67 | 19    |
| 5  | 769.43   | 385.22 | 752.41   | 376.71 | 751.42   | 376.21 | L   | 2,207.29 | 1,104.15 | 2,190.27 | 1,095.64 | 2,189.28 | 1,095.14 | 18    |
| 6  | 916.50   | 458.75 | 899.47   | 450.24 | 898.49   | 449.75 | F   | 2,094.21 | 1,047.61 | 2,077.18 | 1,039.09 | 2,076.20 | 1,038.60 | 17    |
| 7  | 1,013.55 | 507.28 | 996.53   | 498.77 | 995.54   | 498.28 | P   | 1,947.14 | 974.07   | 1,930.11 | 965.56   | 1,929.13 | 965.07   | 16    |
| 8  | 1,141.61 | 571.31 | 1,124.59 | 562.80 | 1,123.60 | 562.30 | Q   | 1,850.09 | 925.55   | 1,833.06 | 917.03   | 1,832.08 | 916.54   | 15    |
| 9  | 1,254.70 | 627.85 | 1,237.67 | 619.34 | 1,236.69 | 618.85 | I   | 1,722.03 | 861.52   | 1,705.00 | 853.00   | 1,704.02 | 852.51   | 14    |
| 10 | 1,367.78 | 684.39 | 1,350.75 | 675.88 | 1,349.77 | 675.39 | L   | 1,608.94 | 804.98   | 1,591.92 | 796.46   | 1,590.93 | 795.97   | 13    |
| 11 | 1,454.81 | 727.91 | 1,437.79 | 719.40 | 1,436.80 | 718.90 | S   | 1,495.86 | 748.43   | 1,478.83 | 739.92   | 1,477.85 | 739.43   | 12    |
| 12 | 1,541.84 | 771.43 | 1,524.82 | 762.91 | 1,523.83 | 762.42 | S   | 1,408.83 | 704.92   | 1,391.80 | 696.40   | 1,390.82 | 695.91   | 11    |

|    |          |          |          |          |          |          |   |          |        |          |        |          |        |    |
|----|----------|----------|----------|----------|----------|----------|---|----------|--------|----------|--------|----------|--------|----|
| 13 | 1,654.93 | 827.97   | 1,637.90 | 819.45   | 1,636.92 | 818.96   | I | 1,321.80 | 661.40 | 1,304.77 | 652.89 | 1,303.79 | 652.40 | 10 |
| 14 | 1,783.97 | 892.49   | 1,766.94 | 883.98   | 1,765.96 | 883.48   | E | 1,208.71 | 604.86 | 1,191.69 | 596.35 | 1,190.70 | 595.85 | 9  |
| 15 | 1,897.06 | 949.03   | 1,880.03 | 940.52   | 1,879.04 | 940.03   | L | 1,079.67 | 540.34 | 1,062.64 | 531.83 | 1,061.66 | 531.33 | 8  |
| 16 | 2,010.14 | 1,005.57 | 1,993.11 | 997.06   | 1,992.13 | 996.57   | L | 966.59   | 483.80 | 949.56   | 475.28 | 948.57   | 474.79 | 7  |
| 17 | 2,138.20 | 1,069.60 | 2,121.17 | 1,061.09 | 2,120.19 | 1,060.60 | Q | 853.50   | 427.25 | 836.47   | 418.74 | 835.49   | 418.25 | 6  |
| 18 | 2,275.26 | 1,138.13 | 2,258.23 | 1,129.62 | 2,257.25 | 1,129.13 | H | 725.44   | 363.22 | 708.42   | 354.71 | 707.43   | 354.22 | 5  |
| 19 | 2,362.29 | 1,181.65 | 2,345.26 | 1,173.13 | 2,344.28 | 1,172.64 | S | 588.38   | 294.70 | 571.36   | 286.18 | 570.37   | 285.69 | 4  |
| 20 | 2,475.37 | 1,238.19 | 2,458.35 | 1,229.68 | 2,457.36 | 1,229.18 | L | 501.35   | 251.18 | 484.33   | 242.67 |          |        | 3  |
| 21 | 2,572.43 | 1,286.72 | 2,555.40 | 1,278.20 | 2,554.41 | 1,277.71 | P | 388.27   | 194.64 | 371.24   | 186.12 |          |        | 2  |
| 22 |          |          |          |          |          |          | K | 291.21   | 146.11 | 274.19   | 137.60 |          |        | 1  |

Query 66076 Hit 1

MS/MS Fragmentation of **VLLDHGAGINTHSNEFK**

Found in **sp|Q81WZ3|ANKH1\_HUMAN**, Ankyrin repeat and KH domain-containing protein 1 OS=Homo sapiens GN=ANKHD1 PE=1 SV=1

Match to Query 66076: 2139.132from(714.0513,3+)

Title: 422: Sum of 2 scans in range 965 (rt=31.4388, f=4, i=286) to 966 (rt=31.4642, f=4, i=287)

[D:\lab212\membrane\GraceJoyce\iTRAQ\_49\_1.raw]

Data File:Submitted from 20120508-1(merge) by Mascot Daemon on JOYCE-VAIO

Monoisotopic mass of neutral peptide Mr(calc): 2139.132

Variable modifications:

K17 iTRAQ4plex (K)

Ions Score: 45.31 Expect: 0.026

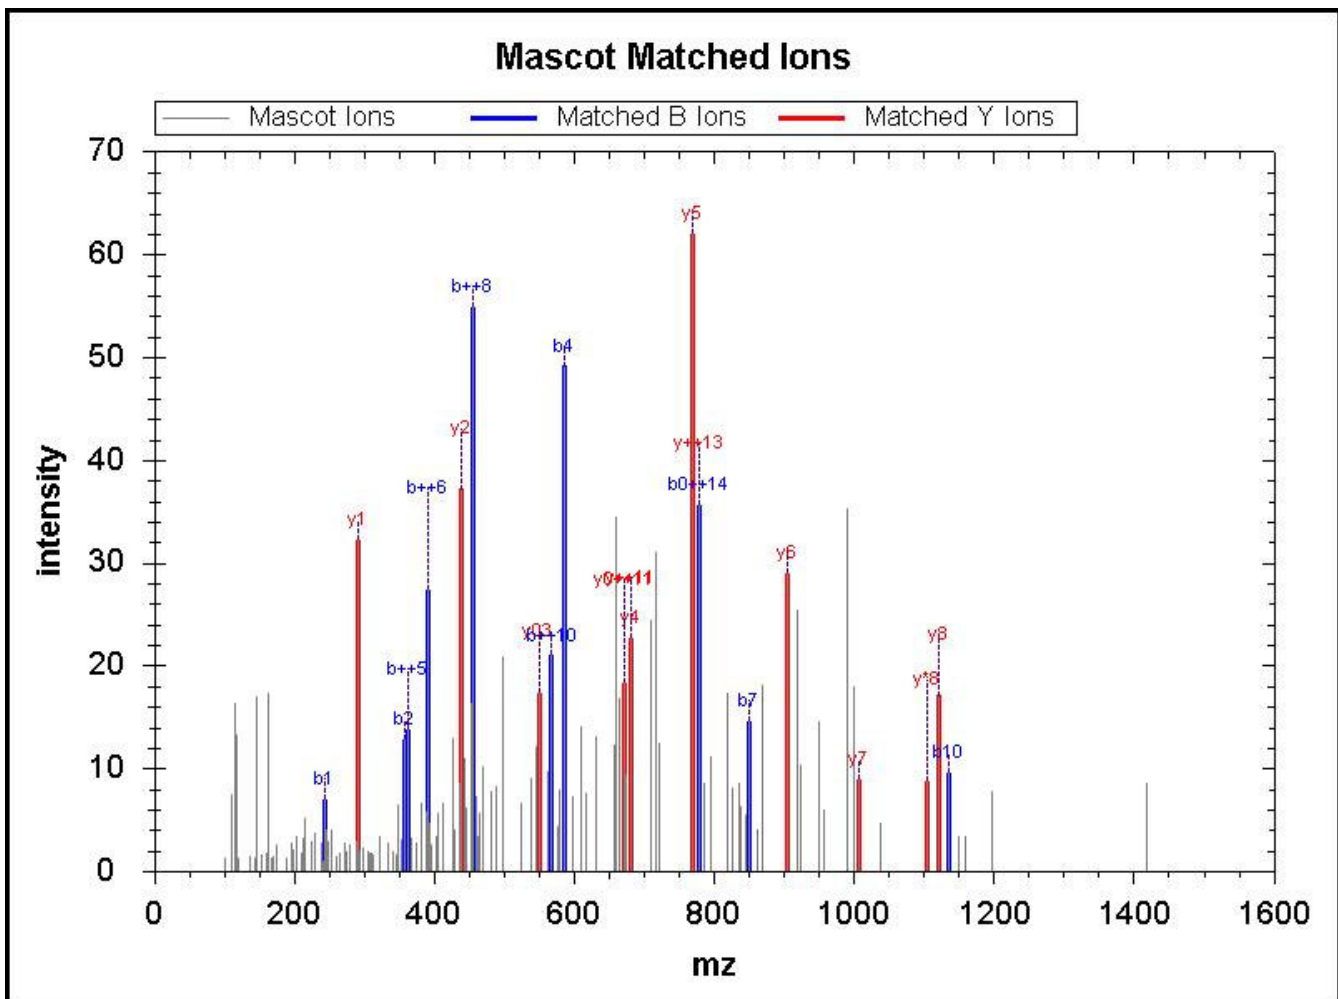

|    |          |        |          |        |          |        |   |          |        |          |        |          |        |    |
|----|----------|--------|----------|--------|----------|--------|---|----------|--------|----------|--------|----------|--------|----|
| 3  | 470.35   | 235.68 |          |        |          |        | L | 1,783.88 | 892.45 | 1,766.86 | 883.93 | 1,765.87 | 883.44 | 15 |
| 4  | 585.37   | 293.19 |          |        | 567.36   | 284.18 | D | 1,670.80 | 835.90 | 1,653.77 | 827.39 | 1,652.79 | 826.90 | 14 |
| 5  | 722.43   | 361.72 |          |        | 704.42   | 352.71 | H | 1,555.77 | 778.39 | 1,538.75 | 769.88 | 1,537.76 | 769.39 | 13 |
| 6  | 779.45   | 390.23 |          |        | 761.44   | 381.22 | G | 1,418.71 | 709.86 | 1,401.69 | 701.35 | 1,400.70 | 700.86 | 12 |
| 7  | 850.49   | 425.75 |          |        | 832.48   | 416.74 | A | 1,361.69 | 681.35 | 1,344.67 | 672.84 | 1,343.68 | 672.34 | 11 |
| 8  | 907.51   | 454.26 |          |        | 889.50   | 445.25 | G | 1,290.66 | 645.83 | 1,273.63 | 637.32 | 1,272.65 | 636.83 | 10 |
| 9  | 1,020.60 | 510.80 |          |        | 1,002.59 | 501.80 | I | 1,233.63 | 617.32 | 1,216.61 | 608.81 | 1,215.62 | 608.32 | 9  |
| 10 | 1,134.64 | 567.82 | 1,117.61 | 559.31 | 1,116.63 | 558.82 | N | 1,120.55 | 560.78 | 1,103.52 | 552.27 | 1,102.54 | 551.77 | 8  |
| 11 | 1,235.69 | 618.35 | 1,218.66 | 609.83 | 1,217.68 | 609.34 | T | 1,006.51 | 503.76 | 989.48   | 495.24 | 988.50   | 494.75 | 7  |
| 12 | 1,372.75 | 686.88 | 1,355.72 | 678.36 | 1,354.73 | 677.87 | H | 905.46   | 453.23 | 888.43   | 444.72 | 887.45   | 444.23 | 6  |
| 13 | 1,459.78 | 730.39 | 1,442.75 | 721.88 | 1,441.77 | 721.39 | S | 768.40   | 384.70 | 751.37   | 376.19 | 750.39   | 375.70 | 5  |
| 14 | 1,573.82 | 787.41 | 1,556.79 | 778.90 | 1,555.81 | 778.41 | N | 681.37   | 341.19 | 664.34   | 332.67 | 663.36   | 332.18 | 4  |
| 15 | 1,702.86 | 851.94 | 1,685.84 | 843.42 | 1,684.85 | 842.93 | E | 567.33   | 284.17 | 550.30   | 275.65 | 549.32   | 275.16 | 3  |
| 16 | 1,849.93 | 925.47 | 1,832.90 | 916.96 | 1,831.92 | 916.46 | F | 438.28   | 219.65 | 421.26   | 211.13 |          |        | 2  |
| 17 |          |        |          |        |          |        | K | 291.21   | 146.11 | 274.19   | 137.60 |          |        | 1  |

Query 15396 Hit 1

MS/MS Fragmentation of **TASVPLDAVR**

Found in **sp|Q96DV4|RM38\_HUMAN**, 39S ribosomal protein L38

Match to Query 15396: 1171.67 from (586.8423, 2+)

Title: 337: Scan 899 (rt=29.2986, f=3, i=121) [D:\lab212\membrane\Grace\Joyce\iTRAQ\_23\_1.raw]

Data File: Submitted from 20120508-1(merge) by Mascot Daemon on JOYCE-VAIO

Monoisotopic mass of neutral peptide Mr(calc): 1171.67

Variable modifications:

Ions Score: 45.27 Expect: 0.018

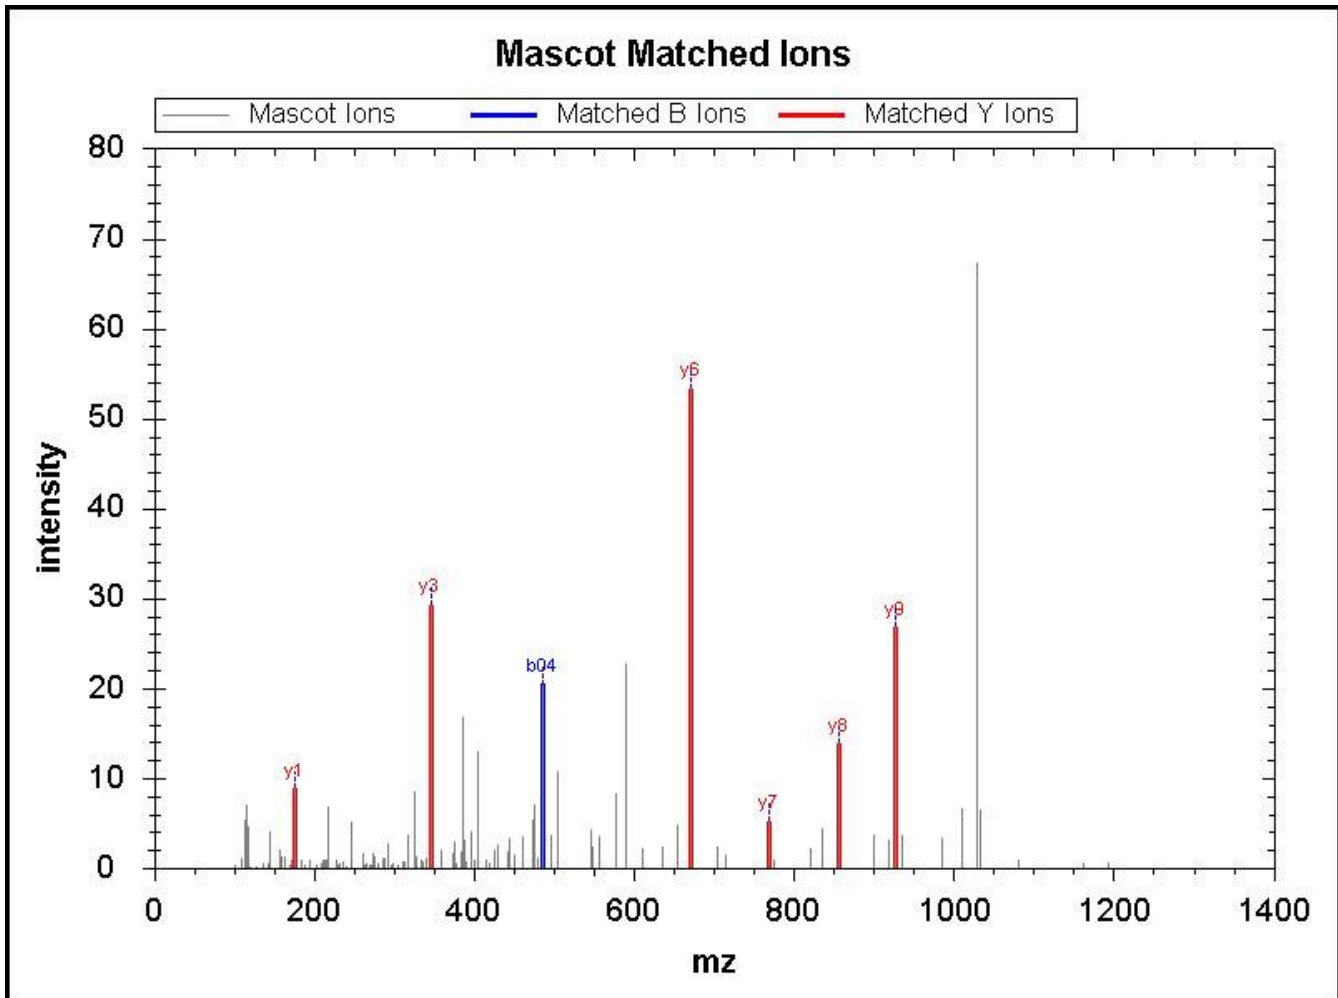

| No | b      | b++    | b0     | b0++   | Seq | y      | y++    | y*     | y*++   | y0     | y0++   | RevNo |
|----|--------|--------|--------|--------|-----|--------|--------|--------|--------|--------|--------|-------|
| 1  | 246.16 | 123.58 | 228.15 | 114.58 | T   |        |        |        |        |        |        | 10    |
| 2  | 317.19 | 159.10 | 299.18 | 150.10 | A   | 927.53 | 464.27 | 910.50 | 455.75 | 909.52 | 455.26 | 9     |
| 3  | 404.23 | 202.62 | 386.22 | 193.61 | S   | 856.49 | 428.75 | 839.46 | 420.23 | 838.48 | 419.74 | 8     |
| 4  | 503.29 | 252.15 | 485.28 | 243.15 | V   | 769.46 | 385.23 | 752.43 | 376.72 | 751.45 | 376.23 | 7     |
| 5  | 600.35 | 300.68 | 582.34 | 291.67 | P   | 670.39 | 335.70 | 653.36 | 327.18 | 652.38 | 326.69 | 6     |
| 6  | 713.43 | 357.22 | 695.42 | 348.21 | L   | 573.34 | 287.17 | 556.31 | 278.66 | 555.32 | 278.17 | 5     |
| 7  | 828.46 | 414.73 | 810.45 | 405.73 | D   | 460.25 | 230.63 | 443.22 | 222.12 | 442.24 | 221.62 | 4     |
| 8  | 899.50 | 450.25 | 881.48 | 441.25 | A   | 345.22 | 173.12 | 328.20 | 164.60 |        |        | 3     |
| 9  | 998.56 | 499.79 | 980.55 | 490.78 | V   | 274.19 | 137.60 | 257.16 | 129.08 |        |        | 2     |
| 10 |        |        |        |        | R   | 175.12 | 88.06  | 158.09 | 79.55  |        |        | 1     |

Query 64697 Hit 1

MS/MS Fragmentation of **LSLNNGSITHLVIRPNGR**

Found in **sp|Q96HS1|PGAM5\_HUMAN**, Serine/threonine-protein phosphatase PGAM5

Match to Query 64697: 2106.172from(527.5504,4+)

Title: 667: Sum of 2 scans in range 1466 (rt=42.7169, f=4, i=449) to 1467 (rt=42.7423, f=4, i=450)

[D:\lab212\membrane\GraceJoyce\iTRAQ\_45\_1.raw]

Data File: Submitted from 20120508-1(merge) by Mascot Daemon on JOYCE-VAIO

Monoisotopic mass of neutral peptide Mr(calc): 2106.172

Variable modifications:

N5 :Deamidated (NQ)

N16 :Deamidated (NQ)

Ions Score: 45.25 Expect: 0.020

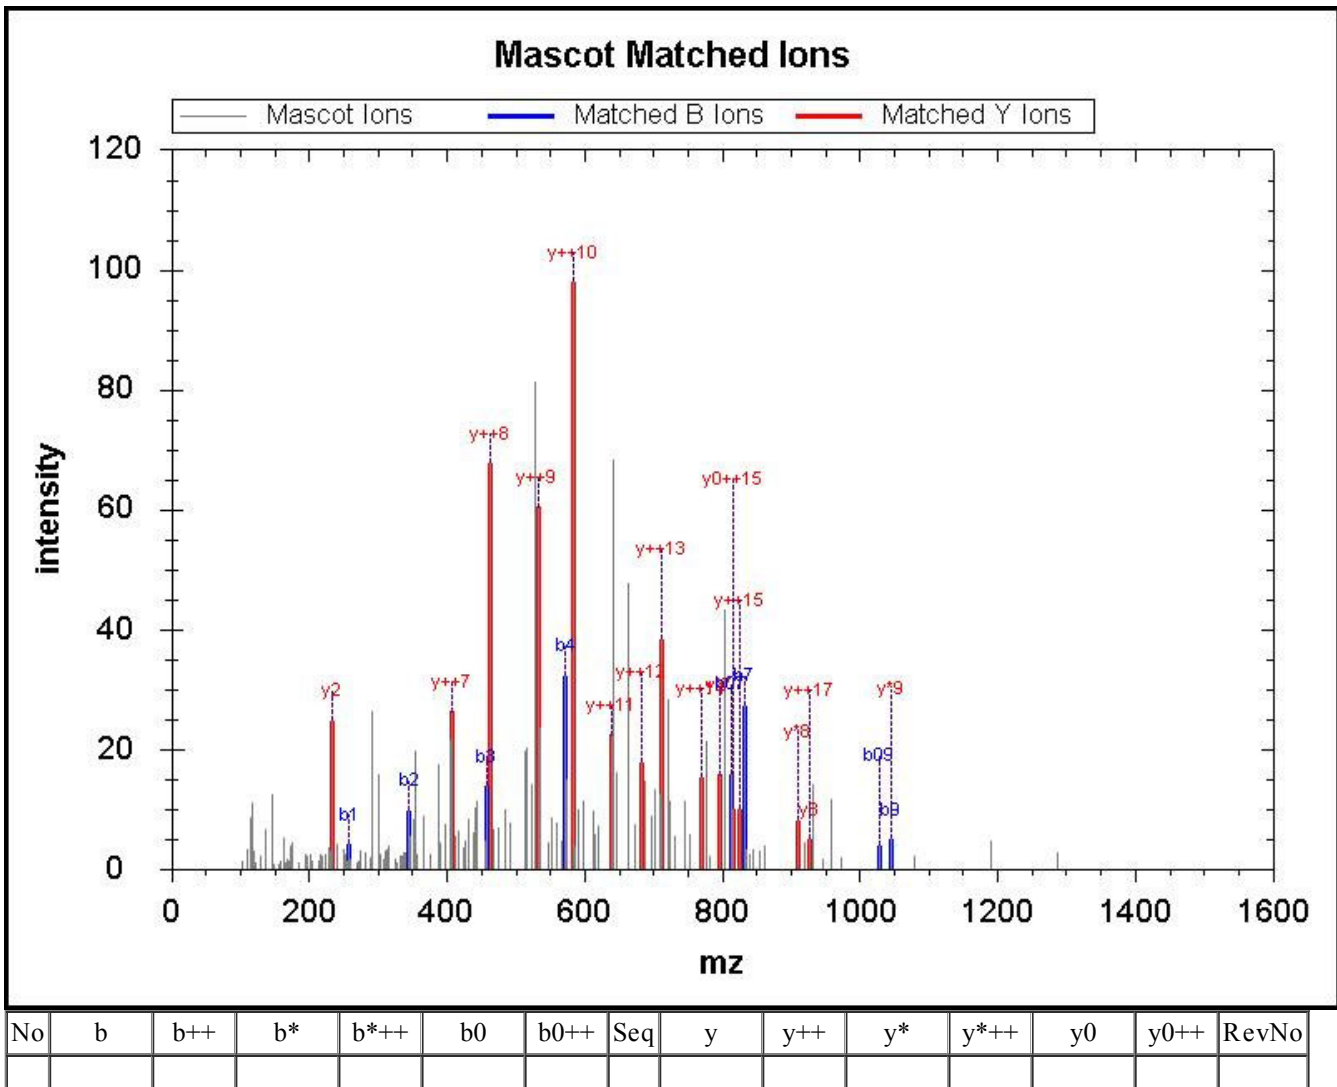

|    |          |        |          |        |          |        |   |          |        |          |        |          |        |    |
|----|----------|--------|----------|--------|----------|--------|---|----------|--------|----------|--------|----------|--------|----|
| 1  | 258.19   | 129.60 |          |        |          |        | L |          |        |          |        |          |        | 18 |
| 2  | 345.23   | 173.12 |          |        | 327.21   | 164.11 | S | 1,849.99 | 925.50 | 1,832.96 | 916.98 | 1,831.98 | 916.49 | 17 |
| 3  | 458.31   | 229.66 |          |        | 440.30   | 220.65 | L | 1,762.96 | 881.98 | 1,745.93 | 873.47 | 1,744.95 | 872.98 | 16 |
| 4  | 572.35   | 286.68 | 555.33   | 278.17 | 554.34   | 277.67 | N | 1,649.87 | 825.44 | 1,632.85 | 816.93 | 1,631.86 | 816.43 | 15 |
| 5  | 687.38   | 344.19 | 670.35   | 335.68 | 669.37   | 335.19 | N | 1,535.83 | 768.42 | 1,518.80 | 759.90 | 1,517.82 | 759.41 | 14 |
| 6  | 744.40   | 372.70 | 727.37   | 364.19 | 726.39   | 363.70 | G | 1,420.80 | 710.90 | 1,403.78 | 702.39 | 1,402.79 | 701.90 | 13 |
| 7  | 831.43   | 416.22 | 814.41   | 407.71 | 813.42   | 407.21 | S | 1,363.78 | 682.39 | 1,346.75 | 673.88 | 1,345.77 | 673.39 | 12 |
| 8  | 944.52   | 472.76 | 927.49   | 464.25 | 926.51   | 463.76 | I | 1,276.75 | 638.88 | 1,259.72 | 630.36 | 1,258.74 | 629.87 | 11 |
| 9  | 1,045.56 | 523.29 | 1,028.54 | 514.77 | 1,027.55 | 514.28 | T | 1,163.66 | 582.34 | 1,146.64 | 573.82 | 1,145.65 | 573.33 | 10 |
| 10 | 1,182.62 | 591.82 | 1,165.60 | 583.30 | 1,164.61 | 582.81 | H | 1,062.62 | 531.81 | 1,045.59 | 523.30 |          |        | 9  |
| 11 | 1,295.71 | 648.36 | 1,278.68 | 639.84 | 1,277.70 | 639.35 | L | 925.56   | 463.28 | 908.53   | 454.77 |          |        | 8  |
| 12 | 1,394.78 | 697.89 | 1,377.75 | 689.38 | 1,376.77 | 688.89 | V | 812.47   | 406.74 | 795.45   | 398.23 |          |        | 7  |
| 13 | 1,507.86 | 754.43 | 1,490.83 | 745.92 | 1,489.85 | 745.43 | I | 713.41   | 357.21 | 696.38   | 348.69 |          |        | 6  |
| 14 | 1,663.96 | 832.48 | 1,646.93 | 823.97 | 1,645.95 | 823.48 | R | 600.32   | 300.66 | 583.29   | 292.15 |          |        | 5  |
| 15 | 1,761.01 | 881.01 | 1,743.99 | 872.50 | 1,743.00 | 872.01 | P | 444.22   | 222.61 | 427.19   | 214.10 |          |        | 4  |
| 16 | 1,876.04 | 938.52 | 1,859.01 | 930.01 | 1,858.03 | 929.52 | N | 347.17   | 174.09 | 330.14   | 165.57 |          |        | 3  |
| 17 | 1,933.06 | 967.03 | 1,916.04 | 958.52 | 1,915.05 | 958.03 | G | 232.14   | 116.57 | 215.11   | 108.06 |          |        | 2  |
| 18 |          |        |          |        |          |        | R | 175.12   | 88.06  | 158.09   | 79.55  |          |        | 1  |

Query 73146 Hit 1

MS/MS Fragmentation of **SVFDIPIFTEEFLNHSK**

Found in **sp|Q9NP66|HM20A\_HUMAN**, High mobility group protein 20A OS=Homo sapiens GN=HMG20A PE=1 SV=1

Match to Query 73146: 2310.217from(771.0797,3+)

Title: 1136: Sum of 2 scans in range 2501 (rt=65.7265, f=4, i=749) to 2502 (rt=65.7519, f=4, i=750)

[D:\lab212\membrane\GraceJoyce\iTRAQ\_36\_1.raw]

Data File: Submitted from 20120508-1(merge) by Mascot Daemon on JOYCE-VAIO

Monoisotopic mass of neutral peptide Mr(calc): 2310.217

Variable modifications:

K17 iTRAQ4plex (K)

Ions Score: 45.02 Expect: 0.027

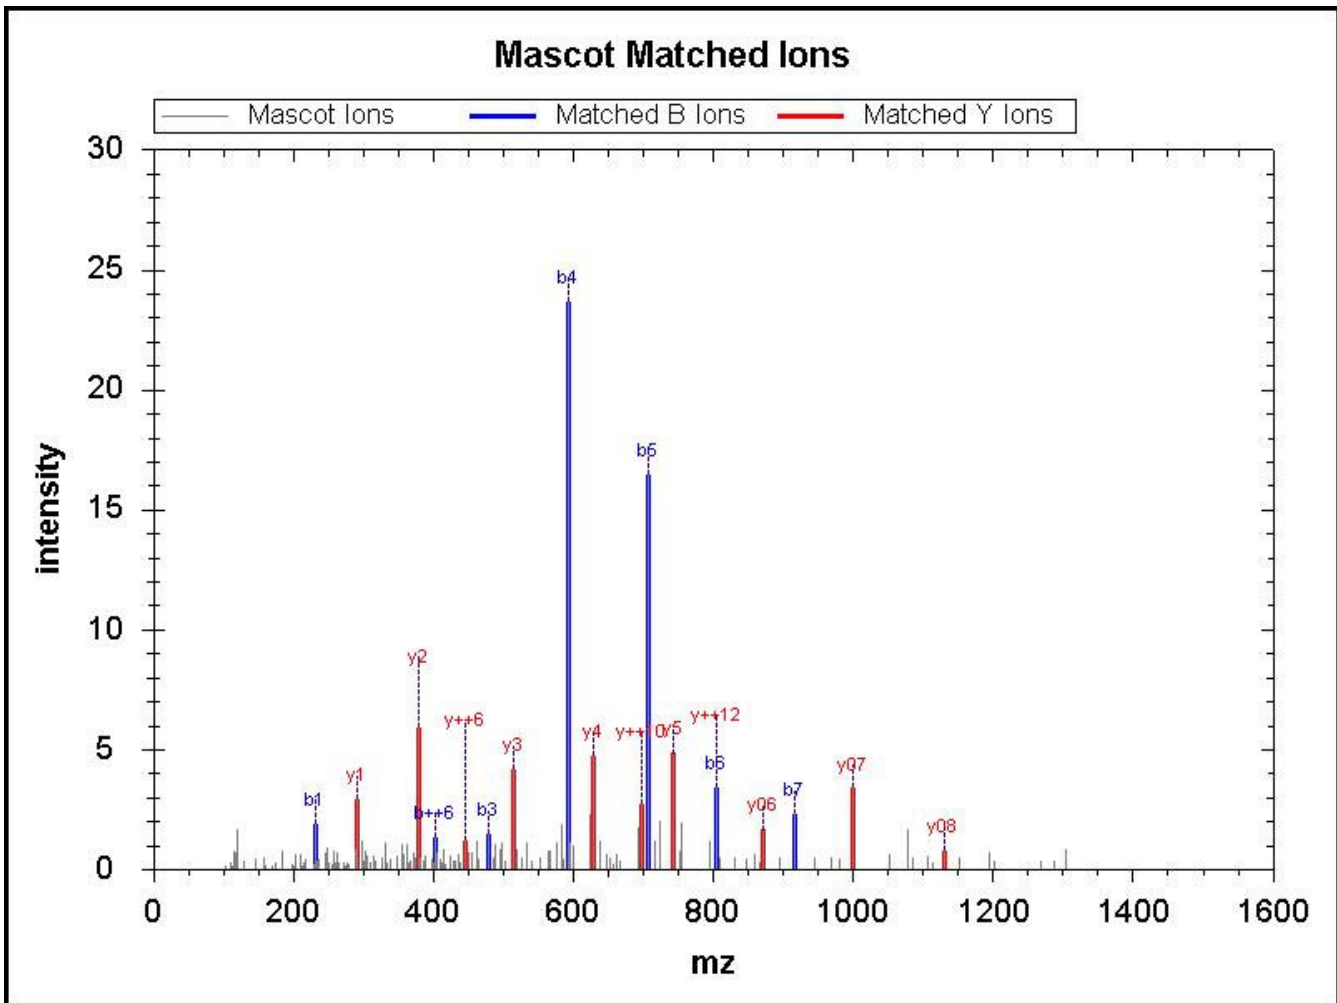

| No | b        | b++      | b*       | b*++     | b0       | b0++     | Seq | y        | y++      | y*       | y*++     | y0       | y0++     | RevNo |
|----|----------|----------|----------|----------|----------|----------|-----|----------|----------|----------|----------|----------|----------|-------|
| 1  | 232.14   | 116.57   |          |          | 214.13   | 107.57   | S   |          |          |          |          |          |          | 17    |
| 2  | 331.21   | 166.11   |          |          | 313.20   | 157.10   | V   | 2,080.09 | 1,040.55 | 2,063.06 | 1,032.03 | 2,062.08 | 1,031.54 | 16    |
| 3  | 478.28   | 239.64   |          |          | 460.27   | 230.64   | F   | 1,981.02 | 991.01   | 1,963.99 | 982.50   | 1,963.01 | 982.01   | 15    |
| 4  | 593.31   | 297.16   |          |          | 575.29   | 288.15   | D   | 1,833.95 | 917.48   | 1,816.92 | 908.97   | 1,815.94 | 908.47   | 14    |
| 5  | 706.39   | 353.70   |          |          | 688.38   | 344.69   | I   | 1,718.92 | 859.97   | 1,701.90 | 851.45   | 1,700.91 | 850.96   | 13    |
| 6  | 803.44   | 402.22   |          |          | 785.43   | 393.22   | P   | 1,605.84 | 803.42   | 1,588.81 | 794.91   | 1,587.83 | 794.42   | 12    |
| 7  | 916.53   | 458.77   |          |          | 898.52   | 449.76   | I   | 1,508.79 | 754.90   | 1,491.76 | 746.38   | 1,490.78 | 745.89   | 11    |
| 8  | 1,063.59 | 532.30   |          |          | 1,045.58 | 523.30   | F   | 1,395.70 | 698.35   | 1,378.68 | 689.84   | 1,377.69 | 689.35   | 10    |
| 9  | 1,164.64 | 582.82   |          |          | 1,146.63 | 573.82   | T   | 1,248.63 | 624.82   | 1,231.61 | 616.31   | 1,230.62 | 615.82   | 9     |
| 10 | 1,293.68 | 647.35   |          |          | 1,275.67 | 638.34   | E   | 1,147.59 | 574.30   | 1,130.56 | 565.78   | 1,129.58 | 565.29   | 8     |
| 11 | 1,422.73 | 711.87   |          |          | 1,404.72 | 702.86   | E   | 1,018.54 | 509.78   | 1,001.52 | 501.26   | 1,000.53 | 500.77   | 7     |
| 12 | 1,569.80 | 785.40   |          |          | 1,551.79 | 776.40   | F   | 889.50   | 445.25   | 872.47   | 436.74   | 871.49   | 436.25   | 6     |
| 13 | 1,682.88 | 841.94   |          |          | 1,664.87 | 832.94   | L   | 742.43   | 371.72   | 725.41   | 363.21   | 724.42   | 362.71   | 5     |
| 14 | 1,796.92 | 898.97   | 1,779.90 | 890.45   | 1,778.91 | 889.96   | N   | 629.35   | 315.18   | 612.32   | 306.66   | 611.34   | 306.17   | 4     |
| 15 | 1,933.98 | 967.49   | 1,916.96 | 958.98   | 1,915.97 | 958.49   | H   | 515.31   | 258.16   | 498.28   | 249.64   | 497.30   | 249.15   | 3     |
| 16 | 2,021.01 | 1,011.01 | 2,003.99 | 1,002.50 | 2,003.00 | 1,002.01 | S   | 378.25   | 189.63   | 361.22   | 181.11   | 360.24   | 180.62   | 2     |
| 17 |          |          |          |          |          |          | K   | 291.21   | 146.11   | 274.19   | 137.60   |          |          | 1     |

Query 60932 Hit 1

MS/MS Fragmentation of **FKPGYLEATLNWFR**

Found in **sp|Q9H2U2|IPYR2\_HUMAN**, Inorganic pyrophosphatase 2

Match to Query 60932: 2029.105from(677.3757,3+)

Title: 1000: Sum of 2 scans in range 2209 (rt=59.2822, f=4, i=663) to 2210 (rt=59.3076, f=4, i=664)

[D:\lab212\membrane\Grace\Joyce\iTRAQ\_41\_2.raw]

Data File: Submitted from 20120508-1(merge) by Mascot Daemon on JOYCE-VAIO



Monoisotopic mass of neutral peptide Mr(calc): 2029.105

Variable modifications:

K2 iTRAQ4plex (K)

Ions Score: 45.02 Expect: 0.025

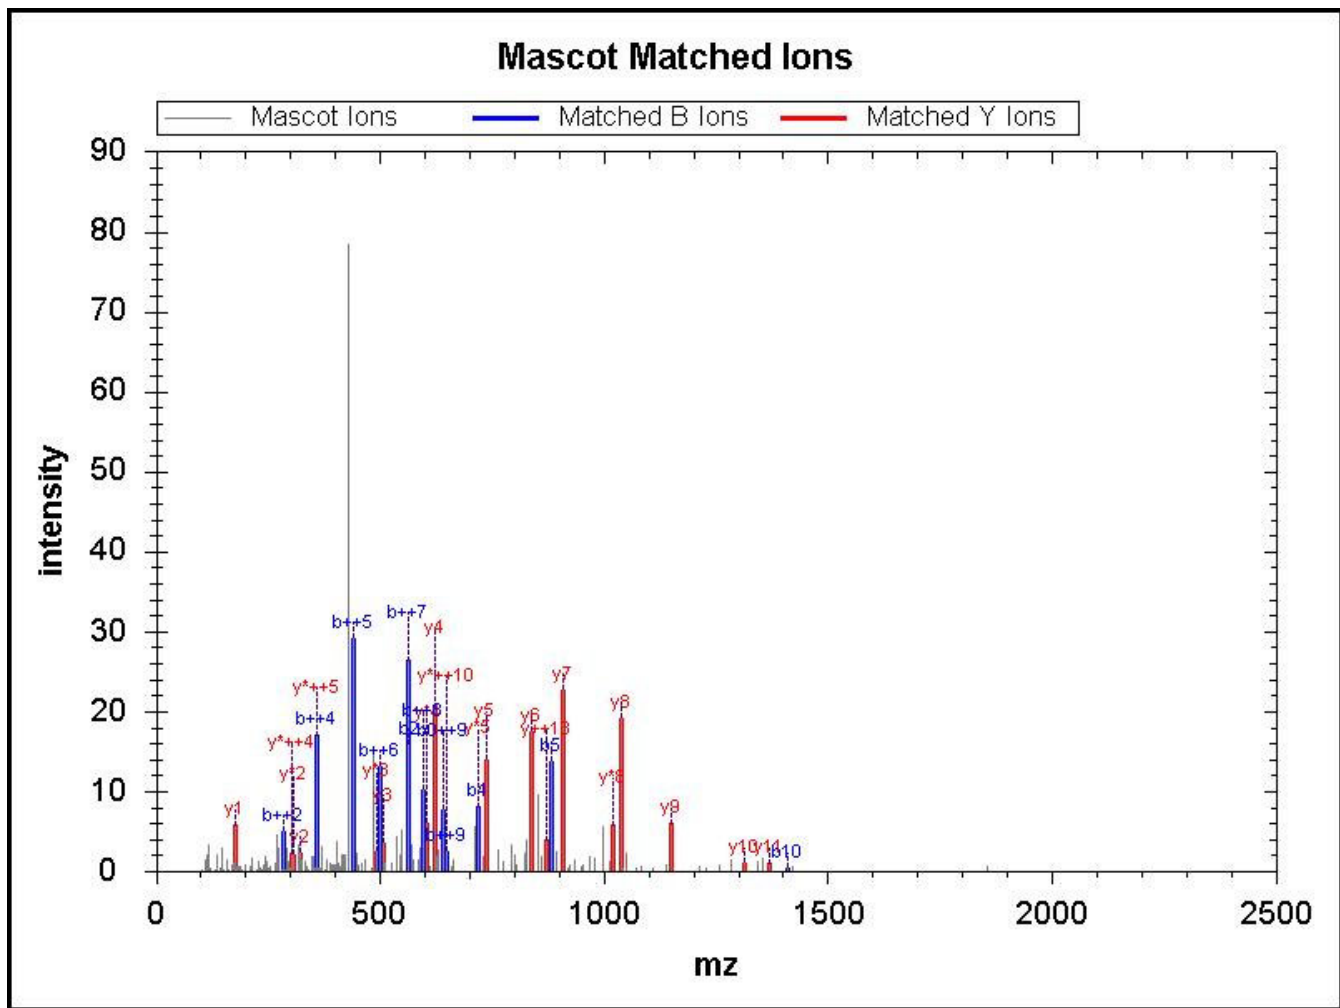

| No | b        | b++    | b*       | b*++   | b0       | b0++   | Seq | y        | y++    | y*       | y*++   | y0       | y0++   | RevNo |
|----|----------|--------|----------|--------|----------|--------|-----|----------|--------|----------|--------|----------|--------|-------|
| 1  | 292.18   | 146.59 |          |        |          |        | F   |          |        |          |        |          |        | 14    |
| 2  | 564.37   | 282.69 | 547.35   | 274.18 |          |        | K   | 1,738.94 | 869.97 | 1,721.91 | 861.46 | 1,720.93 | 860.97 | 13    |
| 3  | 661.43   | 331.22 | 644.40   | 322.70 |          |        | P   | 1,466.74 | 733.88 | 1,449.72 | 725.36 | 1,448.73 | 724.87 | 12    |
| 4  | 718.45   | 359.73 | 701.42   | 351.21 |          |        | G   | 1,369.69 | 685.35 | 1,352.66 | 676.84 | 1,351.68 | 676.34 | 11    |
| 5  | 881.51   | 441.26 | 864.49   | 432.75 |          |        | Y   | 1,312.67 | 656.84 | 1,295.64 | 648.32 | 1,294.66 | 647.83 | 10    |
| 6  | 994.60   | 497.80 | 977.57   | 489.29 |          |        | L   | 1,149.61 | 575.31 | 1,132.58 | 566.79 | 1,131.59 | 566.30 | 9     |
| 7  | 1,123.64 | 562.32 | 1,106.61 | 553.81 | 1,105.63 | 553.32 | E   | 1,036.52 | 518.76 | 1,019.49 | 510.25 | 1,018.51 | 509.76 | 8     |
| 8  | 1,194.68 | 597.84 | 1,177.65 | 589.33 | 1,176.67 | 588.84 | A   | 907.48   | 454.24 | 890.45   | 445.73 | 889.47   | 445.24 | 7     |
| 9  | 1,295.72 | 648.37 | 1,278.70 | 639.85 | 1,277.71 | 639.36 | T   | 836.44   | 418.72 | 819.41   | 410.21 | 818.43   | 409.72 | 6     |
| 10 | 1,408.81 | 704.91 | 1,391.78 | 696.39 | 1,390.80 | 695.90 | L   | 735.39   | 368.20 | 718.37   | 359.69 |          |        | 5     |
| 11 | 1,522.85 | 761.93 | 1,505.82 | 753.42 | 1,504.84 | 752.92 | N   | 622.31   | 311.66 | 605.28   | 303.15 |          |        | 4     |
| 12 | 1,708.93 | 854.97 | 1,691.90 | 846.46 | 1,690.92 | 845.96 | W   | 508.27   | 254.64 | 491.24   | 246.12 |          |        | 3     |
| 13 | 1,856.00 | 928.50 | 1,838.97 | 919.99 | 1,837.99 | 919.50 | F   | 322.19   | 161.60 | 305.16   | 153.08 |          |        | 2     |
| 14 |          |        |          |        |          |        | R   | 175.12   | 88.06  | 158.09   | 79.55  |          |        | 1     |

Query 35799 Hit 1

MS/MS Fragmentation of **VGPGNHGTEGSSGGER**

Found in [sp|Q99442|SEC62\\_HUMAN](#), Translocation protein SEC62 OS=Homo sapiens GN=SEC62 PE=1 SV=1

Match to Query 35799: 1553.729from(518.9169,3+)

Title: 13: Scan 138 (rt=12.6659, f=3, i=8) [D:\lab212\membrane\Grace\Joyce\iTRAQ\_42\_1.raw]

Data File:Submitted from 20120508-1(merge) by Mascot Daemon on JOYCE-VAIO

Monoisotopic mass of neutral peptide Mr(calc): 1553.729

Variable modifications:

Ions Score: 45.02 Expect: 0.019

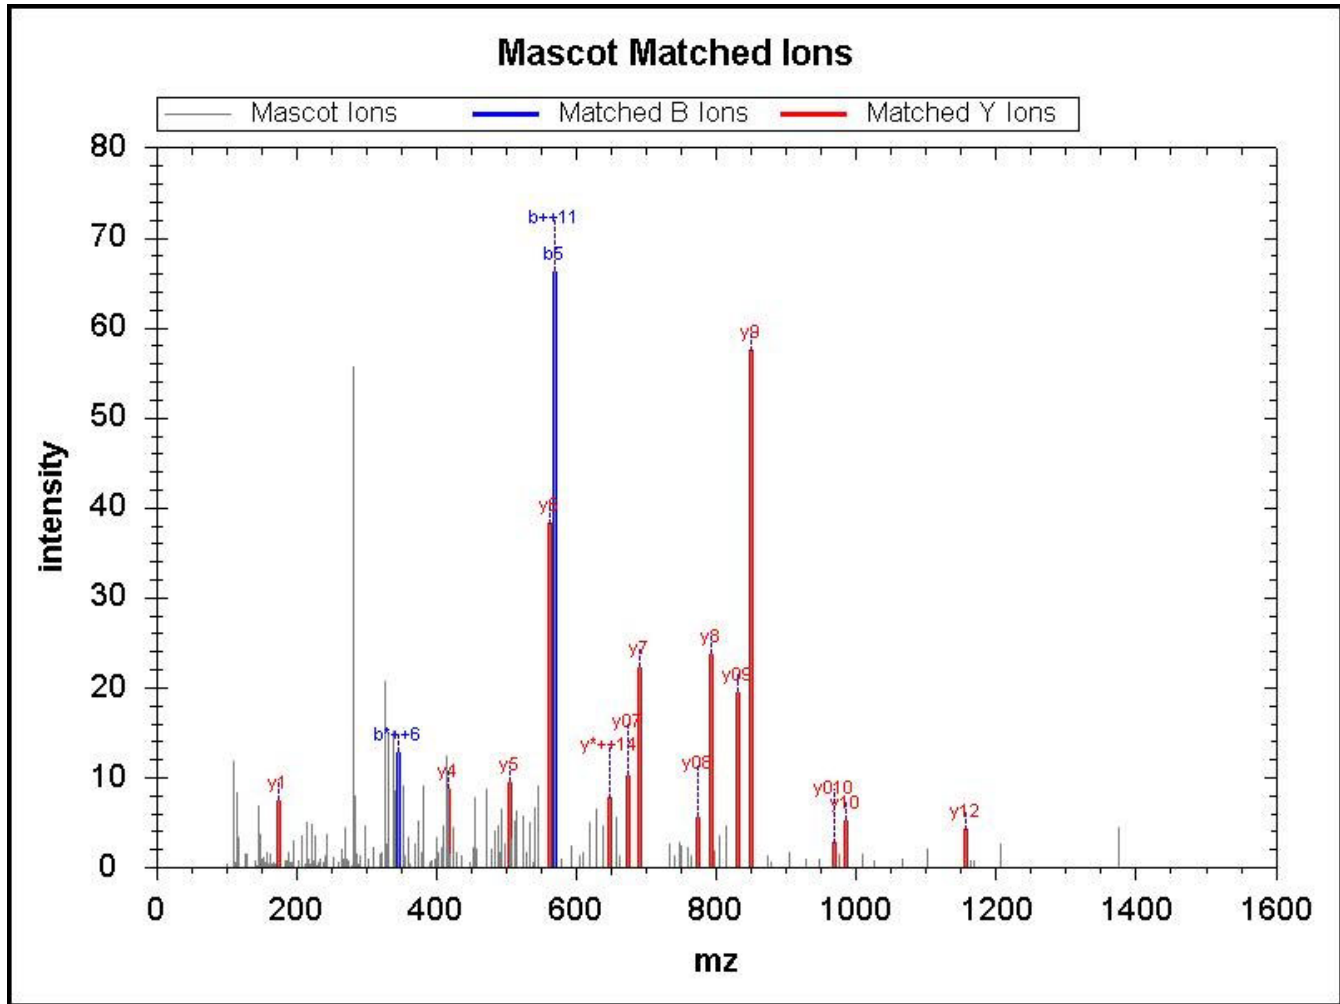

| No | b        | b++    | b*       | b*++   | b0       | b0++   | Seq | y        | y++    | y*       | y*++   | y0       | y0++   | RevNo |
|----|----------|--------|----------|--------|----------|--------|-----|----------|--------|----------|--------|----------|--------|-------|
| 1  | 244.18   | 122.59 |          |        |          |        | V   |          |        |          |        |          |        | 15    |
| 2  | 301.20   | 151.10 |          |        |          |        | G   | 1,311.57 | 656.29 | 1,294.54 | 647.77 | 1,293.56 | 647.28 | 14    |
| 3  | 398.25   | 199.63 |          |        |          |        | P   | 1,254.55 | 627.78 | 1,237.52 | 619.26 | 1,236.54 | 618.77 | 13    |
| 4  | 455.27   | 228.14 |          |        |          |        | G   | 1,157.49 | 579.25 | 1,140.47 | 570.74 | 1,139.48 | 570.24 | 12    |
| 5  | 569.32   | 285.16 | 552.29   | 276.65 |          |        | N   | 1,100.47 | 550.74 | 1,083.45 | 542.23 | 1,082.46 | 541.73 | 11    |
| 6  | 706.38   | 353.69 | 689.35   | 345.18 |          |        | H   | 986.43   | 493.72 | 969.40   | 485.20 | 968.42   | 484.71 | 10    |
| 7  | 763.40   | 382.20 | 746.37   | 373.69 |          |        | G   | 849.37   | 425.19 | 832.34   | 416.68 | 831.36   | 416.18 | 9     |
| 8  | 864.44   | 432.73 | 847.42   | 424.21 | 846.43   | 423.72 | T   | 792.35   | 396.68 | 775.32   | 388.16 | 774.34   | 387.67 | 8     |
| 9  | 993.49   | 497.25 | 976.46   | 488.73 | 975.48   | 488.24 | E   | 691.30   | 346.15 | 674.27   | 337.64 | 673.29   | 337.15 | 7     |
| 10 | 1,050.51 | 525.76 | 1,033.48 | 517.24 | 1,032.50 | 516.75 | G   | 562.26   | 281.63 | 545.23   | 273.12 | 544.25   | 272.63 | 6     |
| 11 | 1,137.54 | 569.27 | 1,120.51 | 560.76 | 1,119.53 | 560.27 | S   | 505.24   | 253.12 | 488.21   | 244.61 | 487.23   | 244.12 | 5     |
| 12 | 1,194.56 | 597.78 | 1,177.54 | 589.27 | 1,176.55 | 588.78 | G   | 418.20   | 209.61 | 401.18   | 201.09 | 400.19   | 200.60 | 4     |
| 13 | 1,251.58 | 626.30 | 1,234.56 | 617.78 | 1,233.57 | 617.29 | G   | 361.18   | 181.10 | 344.16   | 172.58 | 343.17   | 172.09 | 3     |
| 14 | 1,380.63 | 690.82 | 1,363.60 | 682.30 | 1,362.62 | 681.81 | E   | 304.16   | 152.58 | 287.13   | 144.07 | 286.15   | 143.58 | 2     |
| 15 |          |        |          |        |          |        | R   | 175.12   | 88.06  | 158.09   | 79.55  |          |        | 1     |

Query 86005 Hit 1

MS/MS Fragmentation of LVQLIEDYSLVSFIPLNIQDK

Found in sp|Q9H9Y4|GPN2\_HUMAN, GPN-loop GTPase 2 OS=Homo sapiens GN=GPN2 PE=2 SV=2

Match to Query 86005: 2734.536from(912.5194,3+)

Title: 1182: Scan 3219 (rt=78.712, f=3, i=399) [D:\lab212\membrane\Grace\Joyce\iTRAQ\_24\_2.raw]

Data File: Submitted from 20120508-1(merge) by Mascot Daemon on JOYCE-VAIO

Monoisotopic mass of neutral peptide Mr(calc): 2734.536

Variable modifications:

K21 iTRAQ4plex (K)

Ions Score: 45 Expect: 0.011

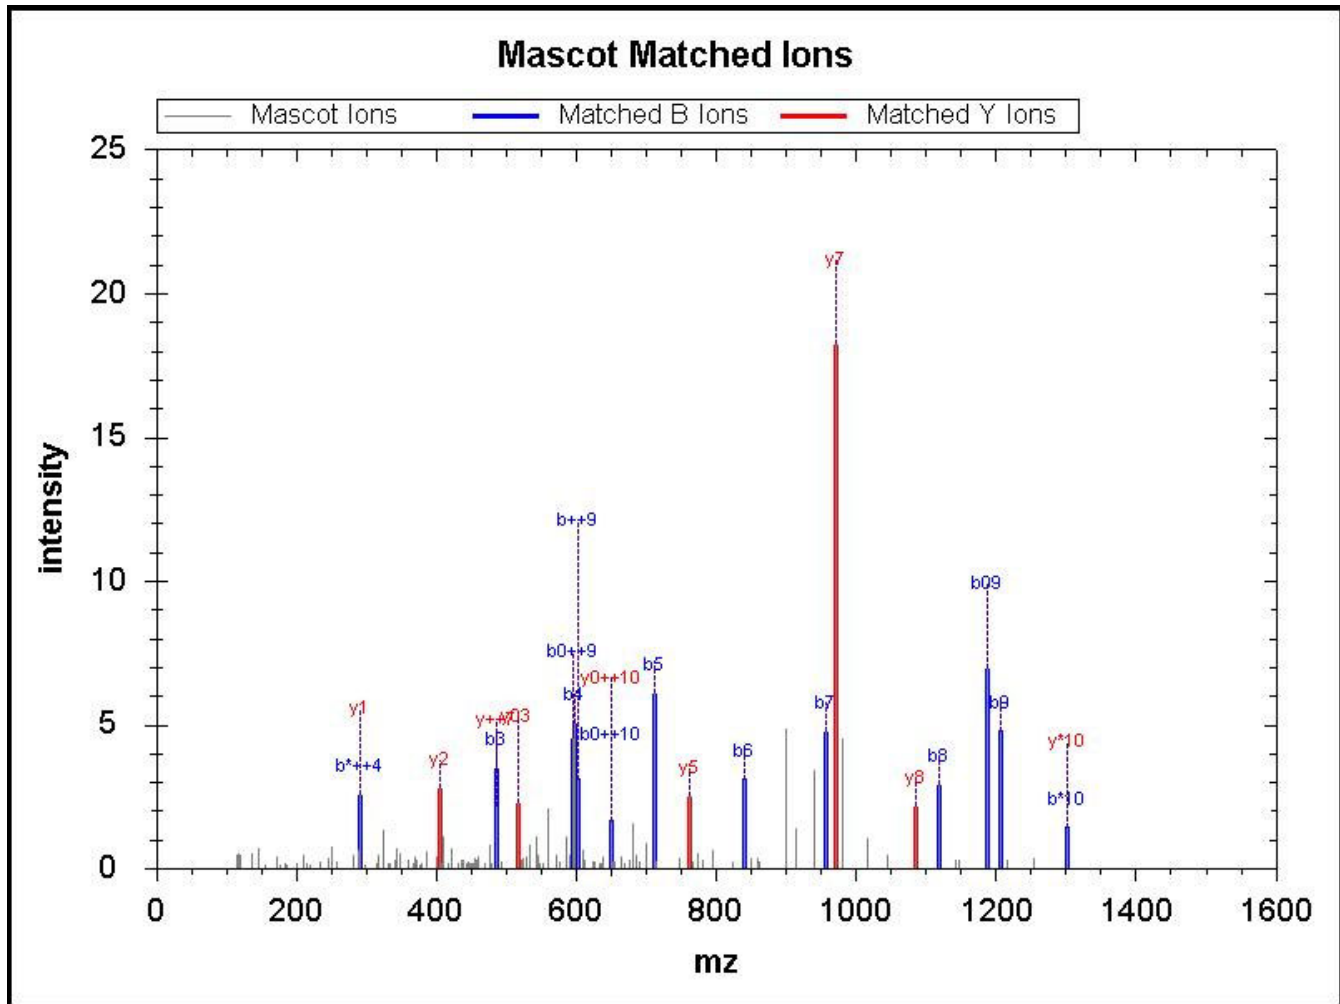

| No | b        | b++      | b*       | b***     | b0       | b0++     | Seq | y        | y++      | y*       | y***     | y0       | y0++     | RevNo |
|----|----------|----------|----------|----------|----------|----------|-----|----------|----------|----------|----------|----------|----------|-------|
| 1  | 258.19   | 129.60   |          |          |          |          | L   |          |          |          |          |          |          | 21    |
| 2  | 357.26   | 179.13   |          |          |          |          | V   | 2,478.36 | 1,239.68 | 2,461.33 | 1,231.17 | 2,460.35 | 1,230.68 | 20    |
| 3  | 485.32   | 243.16   | 468.29   | 234.65   |          |          | Q   | 2,379.29 | 1,190.15 | 2,362.27 | 1,181.64 | 2,361.28 | 1,181.14 | 19    |
| 4  | 598.40   | 299.71   | 581.38   | 291.19   |          |          | L   | 2,251.23 | 1,126.12 | 2,234.21 | 1,117.61 | 2,233.22 | 1,117.12 | 18    |
| 5  | 711.49   | 356.25   | 694.46   | 347.73   |          |          | I   | 2,138.15 | 1,069.58 | 2,121.12 | 1,061.07 | 2,120.14 | 1,060.57 | 17    |
| 6  | 840.53   | 420.77   | 823.50   | 412.26   | 822.52   | 411.76   | E   | 2,025.07 | 1,013.04 | 2,008.04 | 1,004.52 | 2,007.06 | 1,004.03 | 16    |
| 7  | 955.56   | 478.28   | 938.53   | 469.77   | 937.55   | 469.28   | D   | 1,896.02 | 948.52   | 1,879.00 | 940.00   | 1,878.01 | 939.51   | 15    |
| 8  | 1,118.62 | 559.81   | 1,101.59 | 551.30   | 1,100.61 | 550.81   | Y   | 1,781.00 | 891.00   | 1,763.97 | 882.49   | 1,762.99 | 882.00   | 14    |
| 9  | 1,205.65 | 603.33   | 1,188.63 | 594.82   | 1,187.64 | 594.33   | S   | 1,617.93 | 809.47   | 1,600.91 | 800.96   | 1,599.92 | 800.46   | 13    |
| 10 | 1,318.74 | 659.87   | 1,301.71 | 651.36   | 1,300.73 | 650.87   | L   | 1,530.90 | 765.95   | 1,513.87 | 757.44   | 1,512.89 | 756.95   | 12    |
| 11 | 1,417.81 | 709.41   | 1,400.78 | 700.89   | 1,399.80 | 700.40   | V   | 1,417.82 | 709.41   | 1,400.79 | 700.90   | 1,399.81 | 700.41   | 11    |
| 12 | 1,504.84 | 752.92   | 1,487.81 | 744.41   | 1,486.83 | 743.92   | S   | 1,318.75 | 659.88   | 1,301.72 | 651.36   | 1,300.74 | 650.87   | 10    |
| 13 | 1,651.91 | 826.46   | 1,634.88 | 817.94   | 1,633.90 | 817.45   | F   | 1,231.72 | 616.36   | 1,214.69 | 607.85   | 1,213.71 | 607.36   | 9     |
| 14 | 1,764.99 | 883.00   | 1,747.96 | 874.49   | 1,746.98 | 873.99   | I   | 1,084.65 | 542.83   | 1,067.62 | 534.31   | 1,066.64 | 533.82   | 8     |
| 15 | 1,862.04 | 931.53   | 1,845.02 | 923.01   | 1,844.03 | 922.52   | P   | 971.56   | 486.29   | 954.54   | 477.77   | 953.55   | 477.28   | 7     |
| 16 | 1,975.13 | 988.07   | 1,958.10 | 979.55   | 1,957.12 | 979.06   | L   | 874.51   | 437.76   | 857.48   | 429.25   | 856.50   | 428.75   | 6     |
| 17 | 2,089.17 | 1,045.09 | 2,072.14 | 1,036.58 | 2,071.16 | 1,036.08 | N   | 761.43   | 381.22   | 744.40   | 372.70   | 743.42   | 372.21   | 5     |
| 18 | 2,202.25 | 1,101.63 | 2,185.23 | 1,093.12 | 2,184.24 | 1,092.63 | I   | 647.38   | 324.20   | 630.36   | 315.68   | 629.37   | 315.19   | 4     |
| 19 | 2,330.31 | 1,165.66 | 2,313.29 | 1,157.15 | 2,312.30 | 1,156.65 | Q   | 534.30   | 267.65   | 517.27   | 259.14   | 516.29   | 258.65   | 3     |

|    |          |          |          |          |          |          |   |        |        |        |        |        |        |   |
|----|----------|----------|----------|----------|----------|----------|---|--------|--------|--------|--------|--------|--------|---|
| 20 | 2,445.34 | 1,223.17 | 2,428.31 | 1,214.66 | 2,427.33 | 1,214.17 | D | 406.24 | 203.62 | 389.22 | 195.11 | 388.23 | 194.62 | 2 |
| 21 |          |          |          |          |          |          | K | 291.21 | 146.11 | 274.19 | 137.60 |        |        | 1 |

Query 4036 Hit 1

MS/MS Fragmentation of **SLSPQGR**

Found in **sp|Q148V8|FA83H\_MOUSE**, Protein FAM83H OS=Mus musculus GN=Fam83h PE=1 SV=1

Match to Query 4036: 888.5192from(445.2669,2+)

Title: 225: Scan 601 (rt=22.8593, f=3, i=81) [D:\lab212\membrane\Grace\Joyce\iTRAQ\_27\_1.raw]

Data File: Submitted from 20120508-1(merge) by Mascot Daemon on JOYCE-VAIO

Monoisotopic mass of neutral peptide Mr(calc): 888.5192

Variable modifications:

Q5 :Deamidated (NQ)

Ions Score: 44.97 Expect: 0.028

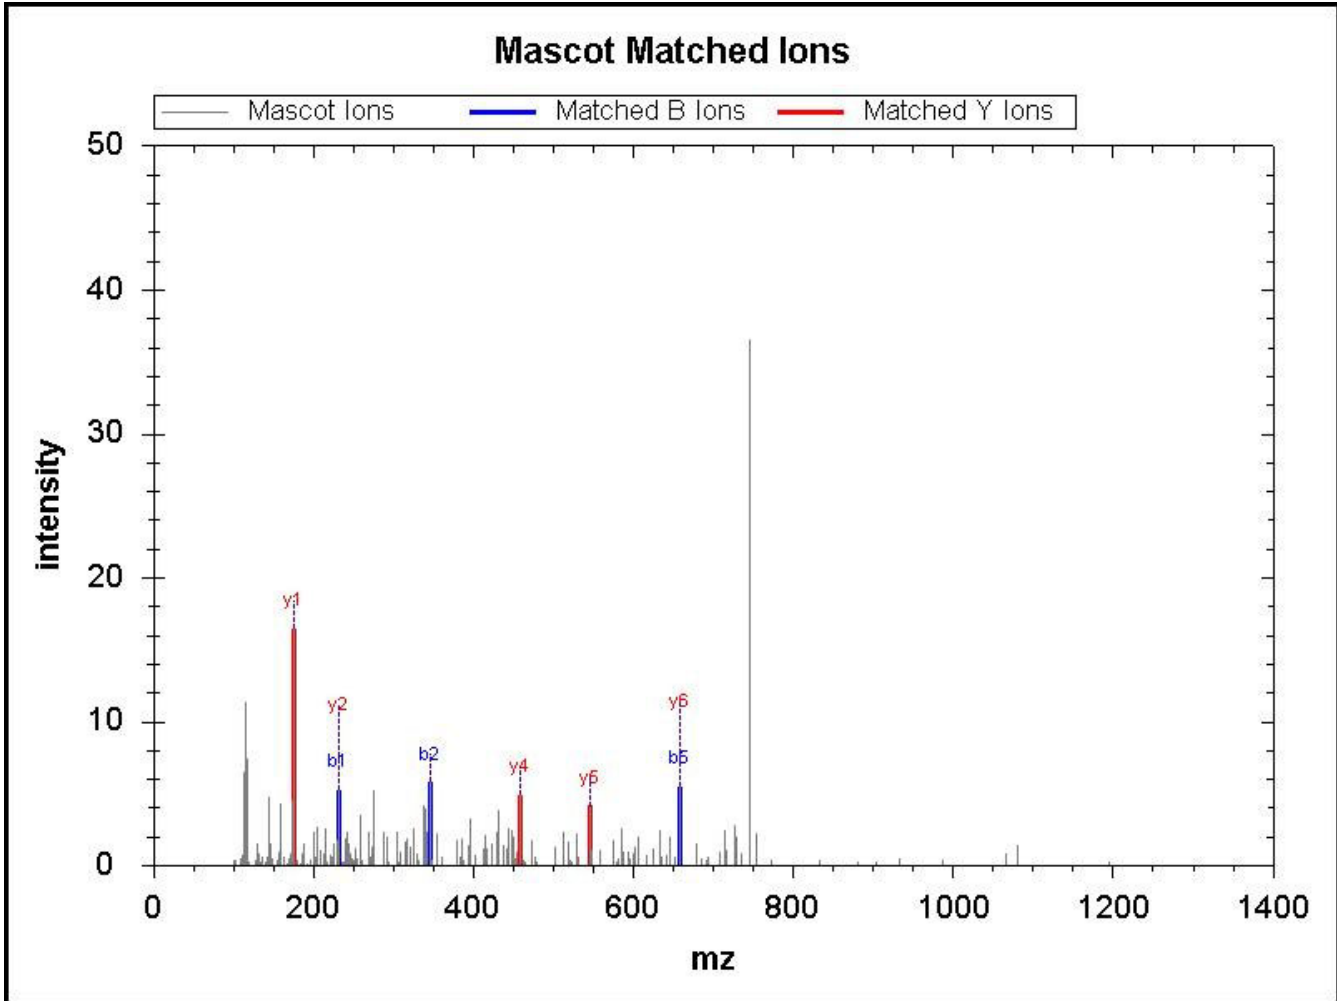

| No | b      | b++    | b*     | b*++   | b0     | b0++   | Seq | y      | y++    | y*     | y*++   | y0     | y0++   | RevNo |
|----|--------|--------|--------|--------|--------|--------|-----|--------|--------|--------|--------|--------|--------|-------|
| 1  | 232.14 | 116.57 |        |        | 214.13 | 107.57 | S   |        |        |        |        |        |        | 7     |
| 2  | 345.23 | 173.12 |        |        | 327.21 | 164.11 | L   | 658.35 | 329.68 | 641.33 | 321.17 | 640.34 | 320.67 | 6     |
| 3  | 432.26 | 216.63 |        |        | 414.25 | 207.63 | S   | 545.27 | 273.14 | 528.24 | 264.62 | 527.26 | 264.13 | 5     |
| 4  | 529.31 | 265.16 |        |        | 511.30 | 256.15 | P   | 458.24 | 229.62 | 441.21 | 221.11 |        |        | 4     |
| 5  | 658.35 | 329.68 | 641.33 | 321.17 | 640.34 | 320.67 | Q   | 361.18 | 181.10 | 344.16 | 172.58 |        |        | 3     |
| 6  | 715.37 | 358.19 | 698.35 | 349.68 | 697.36 | 349.19 | G   | 232.14 | 116.57 | 215.11 | 108.06 |        |        | 2     |
| 7  |        |        |        |        |        |        | R   | 175.12 | 88.06  | 158.09 | 79.55  |        |        | 1     |

Query 53530 Hit 1

MS/MS Fragmentation of **ILDIGLAYINHLVER**

Found in **sp|P49754|VPS41\_HUMAN**, Vacuolar protein sorting-associated protein 41 homolog OS=Homo sapiens GN=VPS41 PE=1 SV=3

Match to Query 53530: 1882.077from(628.3663,3+)

Title: 1198: Sum of 2 scans in range 2655 (rt=69.1936, f=4, i=773) to 2656 (rt=69.219, f=4, i=774)

[D:\lab212\membrane\GraceJoyce\iTRAQ\_34\_2.raw]

Data File: Submitted from 20120508-1(merge) by Mascot Daemon on JOYCE-VAIO

Monoisotopic mass of neutral peptide Mr(calc): 1882.077

Variable modifications:

Ions Score: 44.97 Expect: 0.017

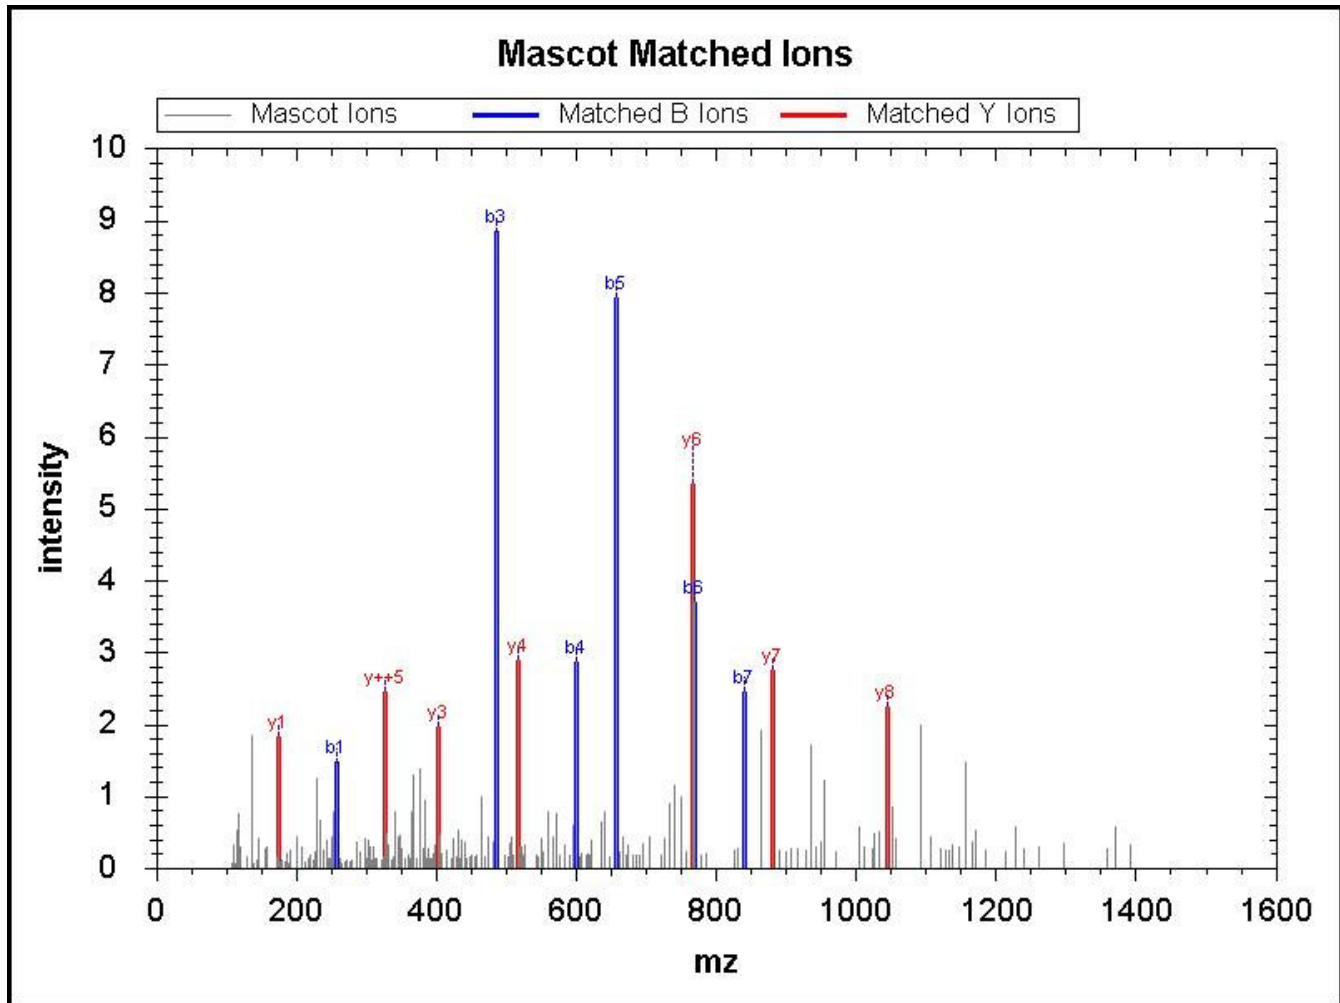

| No | b        | b++    | b*       | b*++   | b0       | b0++   | Seq | y        | y++    | y*       | y*++   | y0       | y0++   | RevNo |
|----|----------|--------|----------|--------|----------|--------|-----|----------|--------|----------|--------|----------|--------|-------|
| 1  | 258.19   | 129.60 |          |        |          |        | I   |          |        |          |        |          |        | 15    |
| 2  | 371.28   | 186.14 |          |        |          |        | L   | 1,625.90 | 813.45 | 1,608.87 | 804.94 | 1,607.89 | 804.45 | 14    |
| 3  | 486.30   | 243.66 |          |        | 468.29   | 234.65 | D   | 1,512.82 | 756.91 | 1,495.79 | 748.40 | 1,494.81 | 747.91 | 13    |
| 4  | 599.39   | 300.20 |          |        | 581.38   | 291.19 | I   | 1,397.79 | 699.40 | 1,380.76 | 690.89 | 1,379.78 | 690.39 | 12    |
| 5  | 656.41   | 328.71 |          |        | 638.40   | 319.70 | G   | 1,284.71 | 642.86 | 1,267.68 | 634.34 | 1,266.70 | 633.85 | 11    |
| 6  | 769.49   | 385.25 |          |        | 751.48   | 376.25 | L   | 1,227.68 | 614.35 | 1,210.66 | 605.83 | 1,209.67 | 605.34 | 10    |
| 7  | 840.53   | 420.77 |          |        | 822.52   | 411.76 | A   | 1,114.60 | 557.80 | 1,097.57 | 549.29 | 1,096.59 | 548.80 | 9     |
| 8  | 1,003.59 | 502.30 |          |        | 985.58   | 493.30 | Y   | 1,043.56 | 522.29 | 1,026.54 | 513.77 | 1,025.55 | 513.28 | 8     |
| 9  | 1,116.68 | 558.84 |          |        | 1,098.67 | 549.84 | I   | 880.50   | 440.75 | 863.47   | 432.24 | 862.49   | 431.75 | 7     |
| 10 | 1,230.72 | 615.86 | 1,213.70 | 607.35 | 1,212.71 | 606.86 | N   | 767.42   | 384.21 | 750.39   | 375.70 | 749.41   | 375.21 | 6     |
| 11 | 1,367.78 | 684.39 | 1,350.75 | 675.88 | 1,349.77 | 675.39 | H   | 653.37   | 327.19 | 636.35   | 318.68 | 635.36   | 318.18 | 5     |
| 12 | 1,480.86 | 740.94 | 1,463.84 | 732.42 | 1,462.85 | 731.93 | L   | 516.31   | 258.66 | 499.29   | 250.15 | 498.30   | 249.66 | 4     |
| 13 | 1,579.93 | 790.47 | 1,562.91 | 781.96 | 1,561.92 | 781.46 | V   | 403.23   | 202.12 | 386.20   | 193.61 | 385.22   | 193.11 | 3     |
| 14 | 1,708.98 | 854.99 | 1,691.95 | 846.48 | 1,690.96 | 845.99 | E   | 304.16   | 152.58 | 287.13   | 144.07 | 286.15   | 143.58 | 2     |
| 15 |          |        |          |        |          |        | R   | 175.12   | 88.06  | 158.09   | 79.55  |          |        | 1     |

Query 36506 Hit 1

MS/MS Fragmentation of **KVPGEGLPLPK**

Found in [sp|P25685|DNJB1\\_HUMAN](#), DnaJ homolog subfamily B member 1 OS=Homo sapiens GN=DNAJB1 PE=1 SV=4  
 Match to Query 36506: 1565.988from(523.0034,3+)  
 Title: 322: Scan 982 (rt=30.8396, f=3, i=112) [D:\lab212\membrane\Grace\Joyce\iTRAQ\_46\_2.raw]  
 Data File: Submitted from 20120508-1(merge) by Mascot Daemon on JOYCE-VAIO  
 Monoisotopic mass of neutral peptide Mr(calc): 1565.988  
 Variable modifications:  
 K1 iTRAQ4plex (K)  
 K11 iTRAQ4plex (K)  
 Ions Score: 44.96 Expect: 0.006

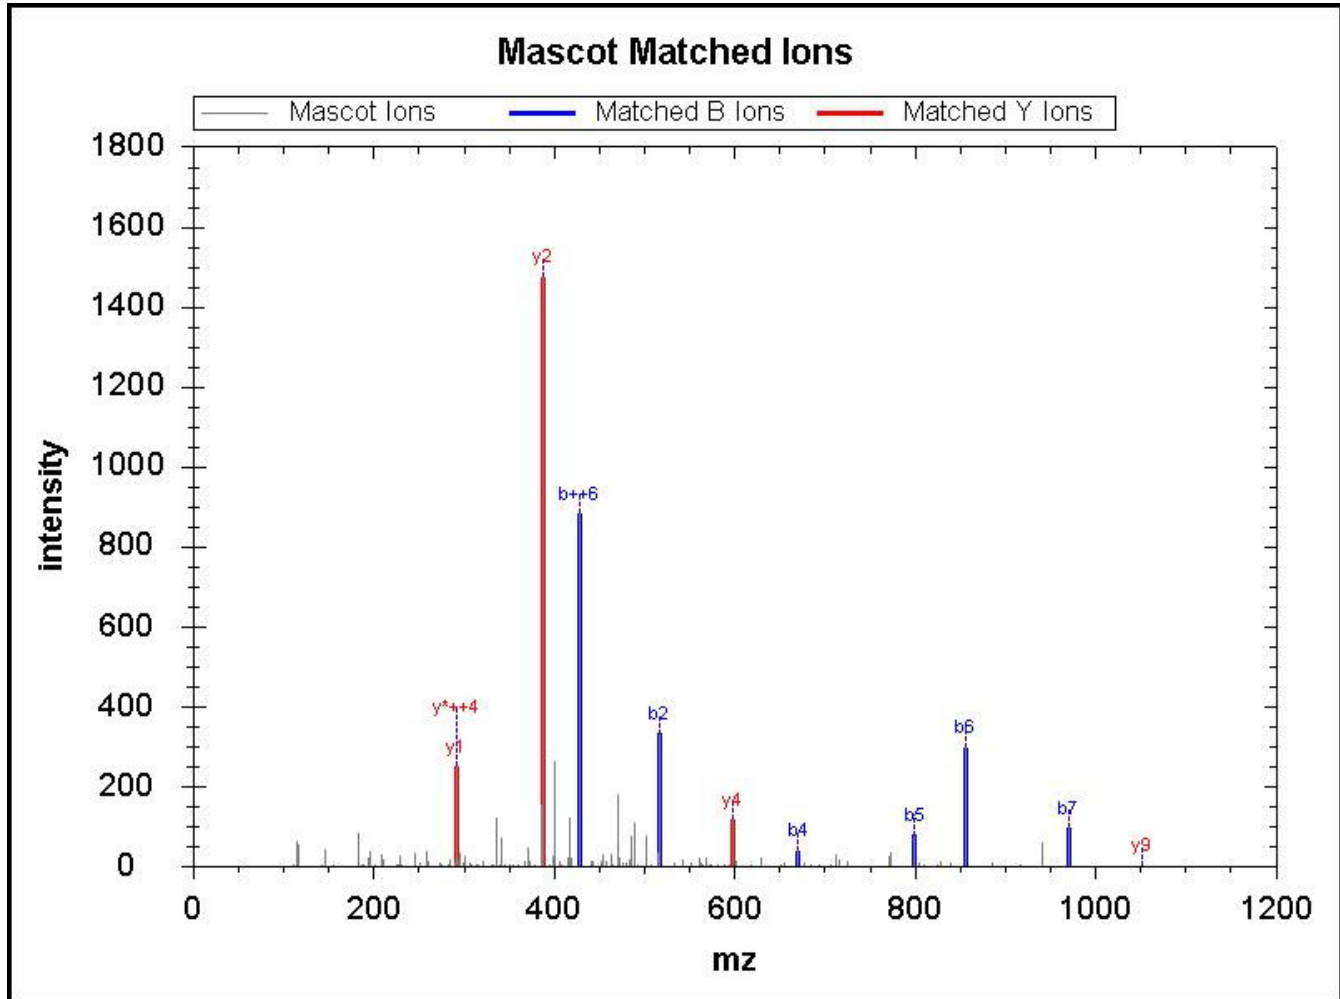

| No | b        | b++    | b*       | b*++   | b0       | b0++   | Seq | y        | y++    | y*       | y*++   | y0       | y0++   | RevNo |
|----|----------|--------|----------|--------|----------|--------|-----|----------|--------|----------|--------|----------|--------|-------|
| 1  | 417.31   | 209.16 | 400.28   | 200.64 |          |        | K   |          |        |          |        |          |        | 11    |
| 2  | 516.37   | 258.69 | 499.35   | 250.18 |          |        | V   | 1,150.70 | 575.85 | 1,133.67 | 567.34 | 1,132.68 | 566.85 | 10    |
| 3  | 613.43   | 307.22 | 596.40   | 298.70 |          |        | P   | 1,051.63 | 526.32 | 1,034.60 | 517.80 | 1,033.62 | 517.31 | 9     |
| 4  | 670.45   | 335.73 | 653.42   | 327.21 |          |        | G   | 954.57   | 477.79 | 937.55   | 469.28 | 936.56   | 468.79 | 8     |
| 5  | 799.49   | 400.25 | 782.47   | 391.74 | 781.48   | 391.24 | E   | 897.55   | 449.28 | 880.53   | 440.77 | 879.54   | 440.27 | 7     |
| 6  | 856.51   | 428.76 | 839.49   | 420.25 | 838.50   | 419.75 | G   | 768.51   | 384.76 | 751.48   | 376.25 |          |        | 6     |
| 7  | 969.60   | 485.30 | 952.57   | 476.79 | 951.59   | 476.30 | L   | 711.49   | 356.25 | 694.46   | 347.73 |          |        | 5     |
| 8  | 1,066.65 | 533.83 | 1,049.62 | 525.32 | 1,048.64 | 524.82 | P   | 598.40   | 299.71 | 581.38   | 291.19 |          |        | 4     |
| 9  | 1,179.73 | 590.37 | 1,162.71 | 581.86 | 1,161.72 | 581.37 | L   | 501.35   | 251.18 | 484.33   | 242.67 |          |        | 3     |
| 10 | 1,276.79 | 638.90 | 1,259.76 | 630.38 | 1,258.78 | 629.89 | P   | 388.27   | 194.64 | 371.24   | 186.12 |          |        | 2     |
| 11 |          |        |          |        |          |        | K   | 291.21   | 146.11 | 274.19   | 137.60 |          |        | 1     |

Query 43588 Hit 1

MS/MS Fragmentation of **THQLSLDAFLVALK**

Found in [sp|Q5JVF3|PCID2\\_HUMAN](#), PCI domain-containing protein 2 OS=Homo sapiens GN=PCID2 PE=1 SV=2  
 Match to Query 43588: 1698.979from(567.3336,3+)  
 Title: 1019: Sum of 2 scans in range 2243 (rt=60.0398, f=4, i=681) to 2244 (rt=60.0653, f=4, i=682)

[D:\lab212\membrane\Grace\Joyce\iTRAQ\_39\_1.raw]

Data File: Submitted from 20120508-1(merge) by Mascot Daemon on JOYCE-VAIO

Monoisotopic mass of neutral peptide Mr(calc): 1698.979

Variable modifications:

K14 iTRAQ4plex (K)

Ions Score: 44.9 Expect: 0.018

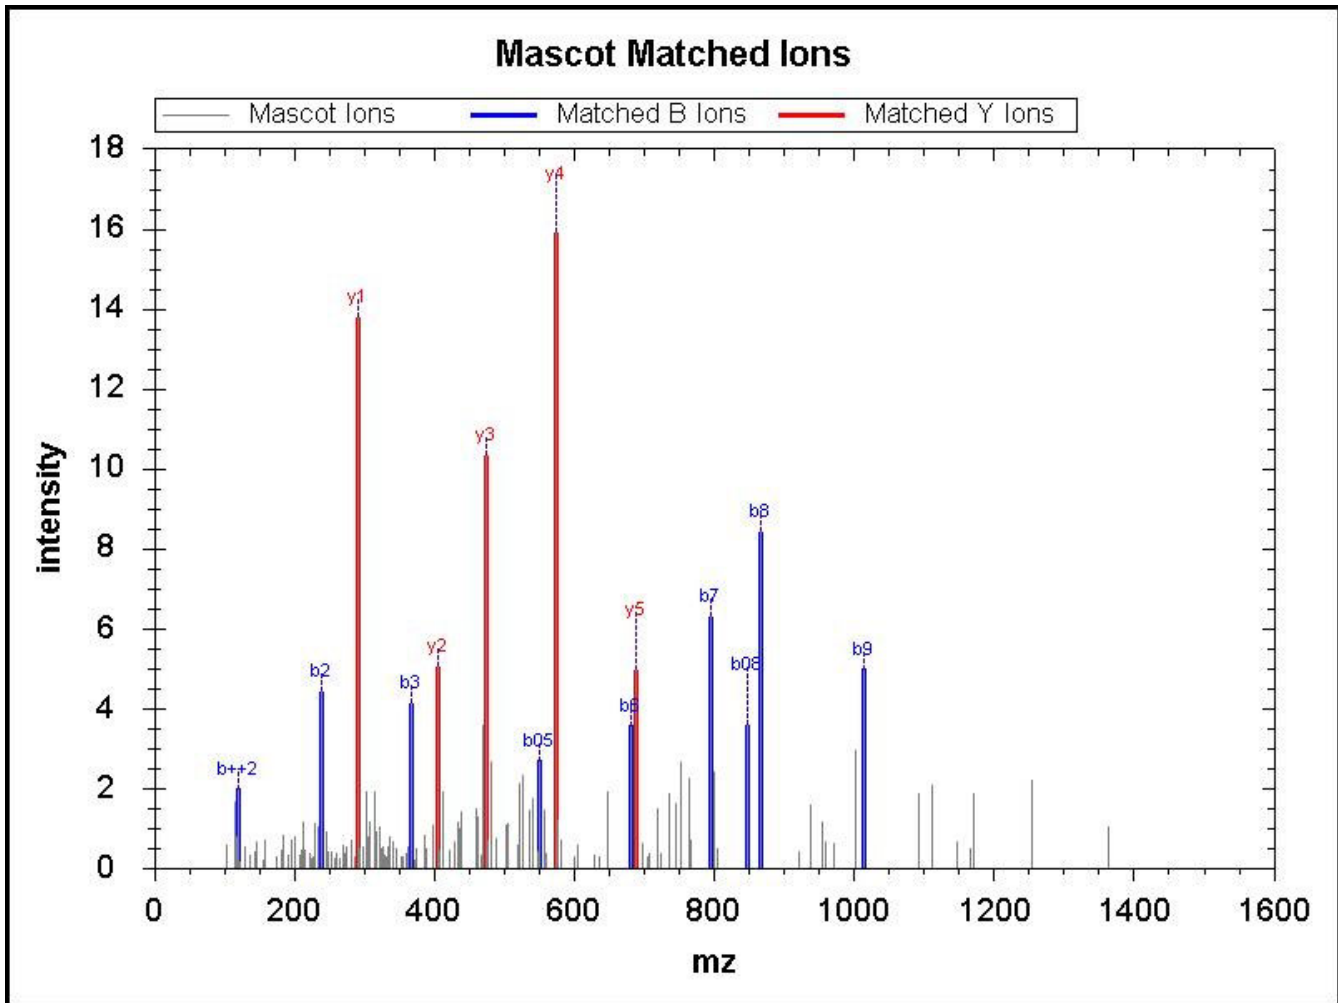

| No | b        | b++    | b*       | b*++   | b0       | b0++   | Seq | y        | y++    | y*       | y*++   | y0       | y0++   | RevNo |
|----|----------|--------|----------|--------|----------|--------|-----|----------|--------|----------|--------|----------|--------|-------|
| 1  | 102.05   | 51.53  |          |        | 84.04    | 42.53  | T   |          |        |          |        |          |        | 14    |
| 2  | 239.11   | 120.06 |          |        | 221.10   | 111.06 | H   | 1,598.94 | 799.97 | 1,581.91 | 791.46 | 1,580.93 | 790.97 | 13    |
| 3  | 367.17   | 184.09 | 350.15   | 175.58 | 349.16   | 175.08 | Q   | 1,461.88 | 731.44 | 1,444.85 | 722.93 | 1,443.87 | 722.44 | 12    |
| 4  | 480.26   | 240.63 | 463.23   | 232.12 | 462.25   | 231.63 | L   | 1,333.82 | 667.41 | 1,316.79 | 658.90 | 1,315.81 | 658.41 | 11    |
| 5  | 567.29   | 284.15 | 550.26   | 275.63 | 549.28   | 275.14 | S   | 1,220.74 | 610.87 | 1,203.71 | 602.36 | 1,202.73 | 601.87 | 10    |
| 6  | 680.37   | 340.69 | 663.35   | 332.18 | 662.36   | 331.68 | L   | 1,133.70 | 567.36 | 1,116.68 | 558.84 | 1,115.69 | 558.35 | 9     |
| 7  | 795.40   | 398.20 | 778.37   | 389.69 | 777.39   | 389.20 | D   | 1,020.62 | 510.81 | 1,003.59 | 502.30 | 1,002.61 | 501.81 | 8     |
| 8  | 866.44   | 433.72 | 849.41   | 425.21 | 848.43   | 424.72 | A   | 905.59   | 453.30 | 888.57   | 444.79 |          |        | 7     |
| 9  | 1,013.51 | 507.26 | 996.48   | 498.74 | 995.49   | 498.25 | F   | 834.56   | 417.78 | 817.53   | 409.27 |          |        | 6     |
| 10 | 1,126.59 | 563.80 | 1,109.56 | 555.28 | 1,108.58 | 554.79 | L   | 687.49   | 344.25 | 670.46   | 335.73 |          |        | 5     |
| 11 | 1,225.66 | 613.33 | 1,208.63 | 604.82 | 1,207.65 | 604.33 | V   | 574.40   | 287.71 | 557.38   | 279.19 |          |        | 4     |
| 12 | 1,296.69 | 648.85 | 1,279.67 | 640.34 | 1,278.68 | 639.85 | A   | 475.34   | 238.17 | 458.31   | 229.66 |          |        | 3     |
| 13 | 1,409.78 | 705.39 | 1,392.75 | 696.88 | 1,391.77 | 696.39 | L   | 404.30   | 202.65 | 387.27   | 194.14 |          |        | 2     |
| 14 |          |        |          |        |          |        | K   | 291.21   | 146.11 | 274.19   | 137.60 |          |        | 1     |

Query 38631 Hit 1

MS/MS Fragmentation of **VDSEPLAILTLHR**

Found in **sp|Q62230|SN\_MOUSE**, Sialoadhesin OS=Mus musculus GN=Siglec1 PE=1 SV=2

Match to Query 38631: 1606.91 from(536.6439,3+)

Title: 730: Scan 1653 (rt=46.6169, f=2, i=255) [D:\lab212\membrane\Grace\Joyce\iTRAQ\_35\_1.raw]  
 Data File: Submitted from 20120508-1(merge) by Mascot Daemon on JOYCE-VAIO  
 Monoisotopic mass of neutral peptide Mr(calc): 1606.91  
 Variable modifications:  
 Ions Score: 44.86 Expect: 0.024

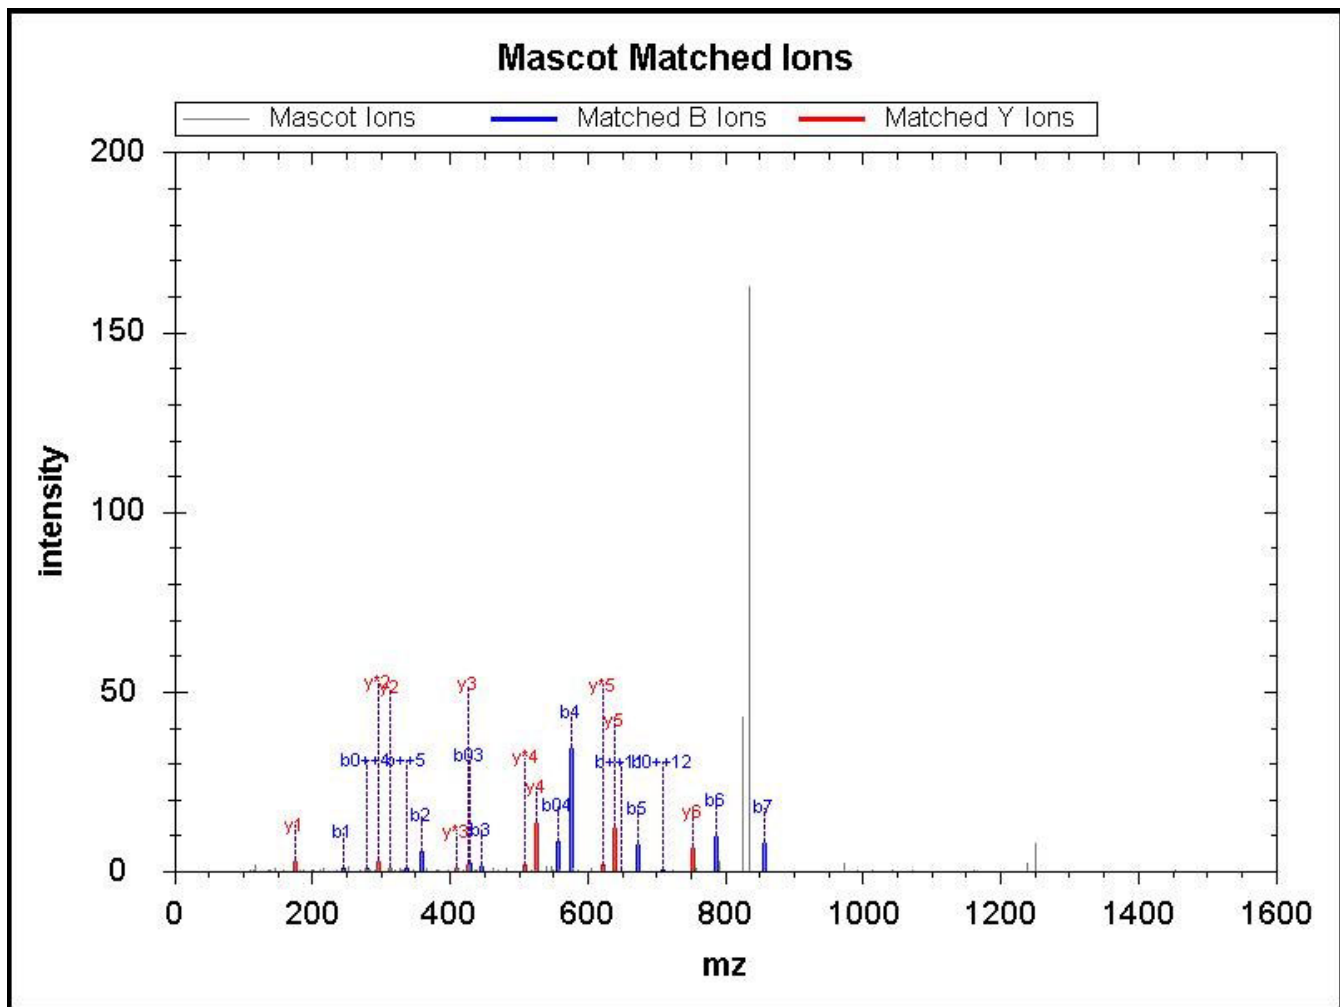

| No | b        | b++    | b0       | b0++   | Seq | y        | y++    | y*       | y*++   | y0       | y0++   | RevNo |
|----|----------|--------|----------|--------|-----|----------|--------|----------|--------|----------|--------|-------|
| 1  | 244.18   | 122.59 |          |        | V   |          |        |          |        |          |        | 13    |
| 2  | 359.20   | 180.11 | 341.19   | 171.10 | D   | 1,364.75 | 682.88 | 1,347.73 | 674.37 | 1,346.74 | 673.87 | 12    |
| 3  | 446.24   | 223.62 | 428.23   | 214.62 | S   | 1,249.73 | 625.37 | 1,232.70 | 616.85 | 1,231.72 | 616.36 | 11    |
| 4  | 575.28   | 288.14 | 557.27   | 279.14 | E   | 1,162.69 | 581.85 | 1,145.67 | 573.34 | 1,144.68 | 572.85 | 10    |
| 5  | 672.33   | 336.67 | 654.32   | 327.66 | P   | 1,033.65 | 517.33 | 1,016.63 | 508.82 | 1,015.64 | 508.32 | 9     |
| 6  | 785.42   | 393.21 | 767.41   | 384.21 | L   | 936.60   | 468.80 | 919.57   | 460.29 | 918.59   | 459.80 | 8     |
| 7  | 856.45   | 428.73 | 838.44   | 419.72 | A   | 823.51   | 412.26 | 806.49   | 403.75 | 805.50   | 403.26 | 7     |
| 8  | 969.54   | 485.27 | 951.53   | 476.27 | I   | 752.48   | 376.74 | 735.45   | 368.23 | 734.47   | 367.74 | 6     |
| 9  | 1,082.62 | 541.81 | 1,064.61 | 532.81 | L   | 639.39   | 320.20 | 622.37   | 311.69 | 621.38   | 311.20 | 5     |
| 10 | 1,183.67 | 592.34 | 1,165.66 | 583.33 | T   | 526.31   | 263.66 | 509.28   | 255.15 | 508.30   | 254.65 | 4     |
| 11 | 1,296.75 | 648.88 | 1,278.74 | 639.88 | L   | 425.26   | 213.13 | 408.24   | 204.62 |          |        | 3     |
| 12 | 1,433.81 | 717.41 | 1,415.80 | 708.40 | H   | 312.18   | 156.59 | 295.15   | 148.08 |          |        | 2     |
| 13 |          |        |          |        | R   | 175.12   | 88.06  | 158.09   | 79.55  |          |        | 1     |

Query 16694 Hit 1

MS/MS Fragmentation of **AALEGTATYR**

Found in **sp|Q9NRV9|HEBP1\_HUMAN**, Heme-binding protein 1 OS=Homo sapiens GN=HEBP1 PE=1 SV=1

Match to Query 16694: 1195.637from(598.8259,2+)

Title: 12: Sum of 2 scans in range 730 (rt=22.6933, f=2, i=20) to 731 (rt=22.7187, f=2, i=21)

[D:\lab212\membrane\Grace\Joyce\iTRAQ\_26\_1.raw]



Data File:Submitted from 20120508-1(merge) by Mascot Daemon on JOYCE-VAIO  
 Monoisotopic mass of neutral peptide Mr(calc): 1195.637  
 Variable modifications:  
 Ions Score: 44.83 Expect: 0.023

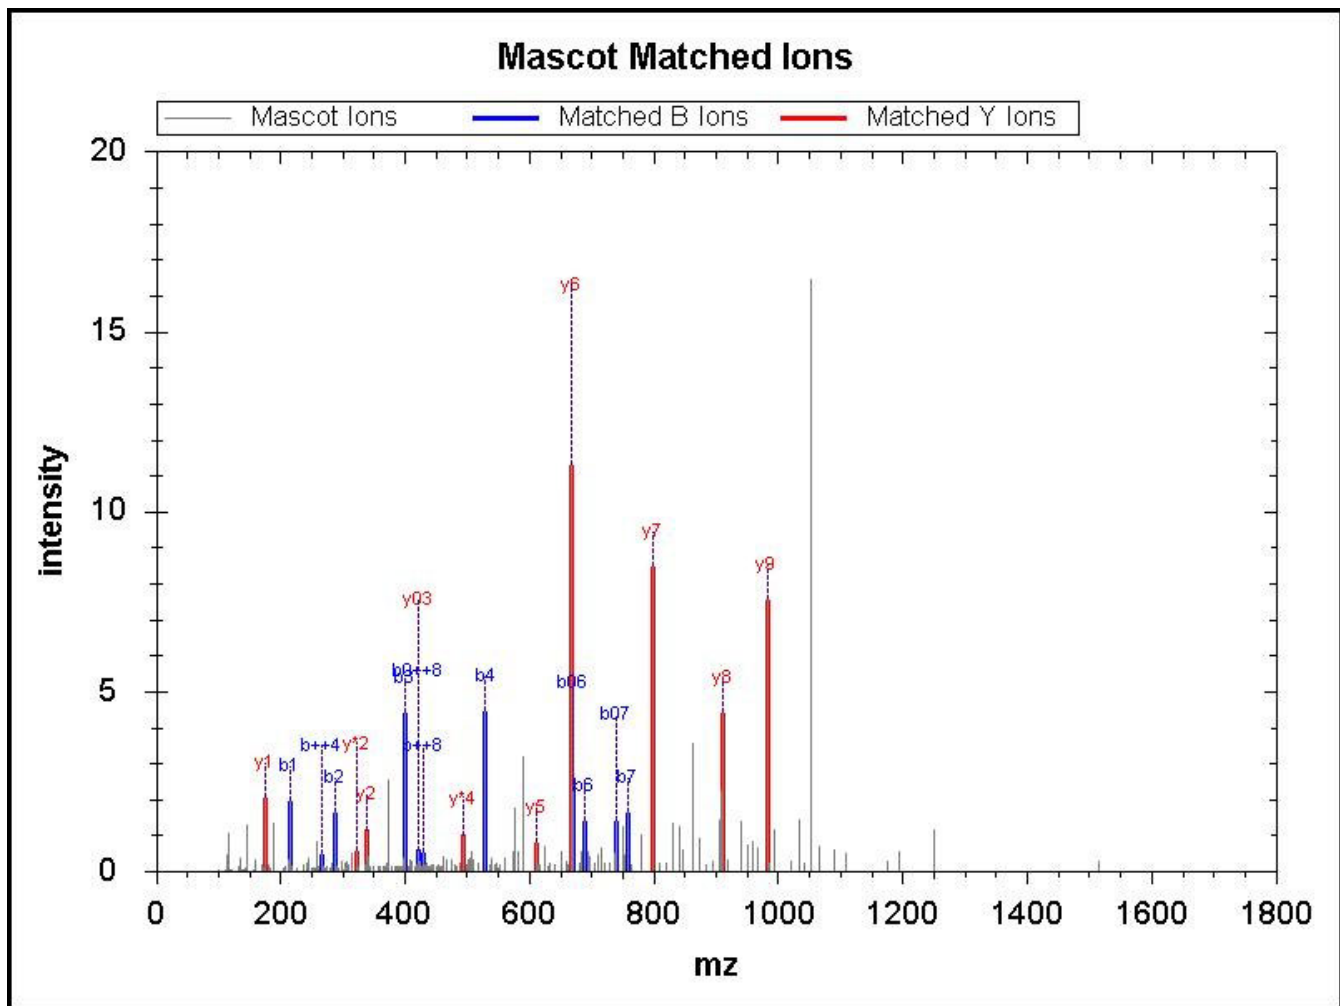

| No | b        | b++    | b0       | b0++   | Seq | y      | y++    | y*     | y*++   | y0     | y0++   | RevNo |
|----|----------|--------|----------|--------|-----|--------|--------|--------|--------|--------|--------|-------|
| 1  | 216.15   | 108.58 |          |        | A   |        |        |        |        |        |        | 10    |
| 2  | 287.18   | 144.10 |          |        | A   | 981.50 | 491.25 | 964.47 | 482.74 | 963.49 | 482.25 | 9     |
| 3  | 400.27   | 200.64 |          |        | L   | 910.46 | 455.74 | 893.44 | 447.22 | 892.45 | 446.73 | 8     |
| 4  | 529.31   | 265.16 | 511.30   | 256.15 | E   | 797.38 | 399.19 | 780.35 | 390.68 | 779.37 | 390.19 | 7     |
| 5  | 586.33   | 293.67 | 568.32   | 284.66 | G   | 668.34 | 334.67 | 651.31 | 326.16 | 650.33 | 325.67 | 6     |
| 6  | 687.38   | 344.19 | 669.37   | 335.19 | T   | 611.31 | 306.16 | 594.29 | 297.65 | 593.30 | 297.16 | 5     |
| 7  | 758.42   | 379.71 | 740.41   | 370.71 | A   | 510.27 | 255.64 | 493.24 | 247.12 | 492.26 | 246.63 | 4     |
| 8  | 859.46   | 430.24 | 841.45   | 421.23 | T   | 439.23 | 220.12 | 422.20 | 211.61 | 421.22 | 211.11 | 3     |
| 9  | 1,022.53 | 511.77 | 1,004.52 | 502.76 | Y   | 338.18 | 169.59 | 321.16 | 161.08 |        |        | 2     |
| 10 |          |        |          |        | R   | 175.12 | 88.06  | 158.09 | 79.55  |        |        | 1     |

Query 32200 Hit 1

MS/MS Fragmentation of **EVLEGLDYLHR**

Found in **sp|Q9UEW8|STK39\_HUMAN**, STE20/SPS1-related proline-alanine-rich protein kinase OS=Homo sapiens GN=STK39 PE=1 SV=3

Match to Query 32200: 1486.791from(496.6041,3+)

Title: 610: Scan 1400 (rt=40.9519, f=3, i=209) [D:\lab212\membrane\Grace\Joyce\iTRAQ\_36\_2.raw]

Data File:Submitted from 20120508-1(merge) by Mascot Daemon on JOYCE-VAIO

Monoisotopic mass of neutral peptide Mr(calc): 1486.791

Variable modifications:

Ions Score: 44.82 Expect: 0.027

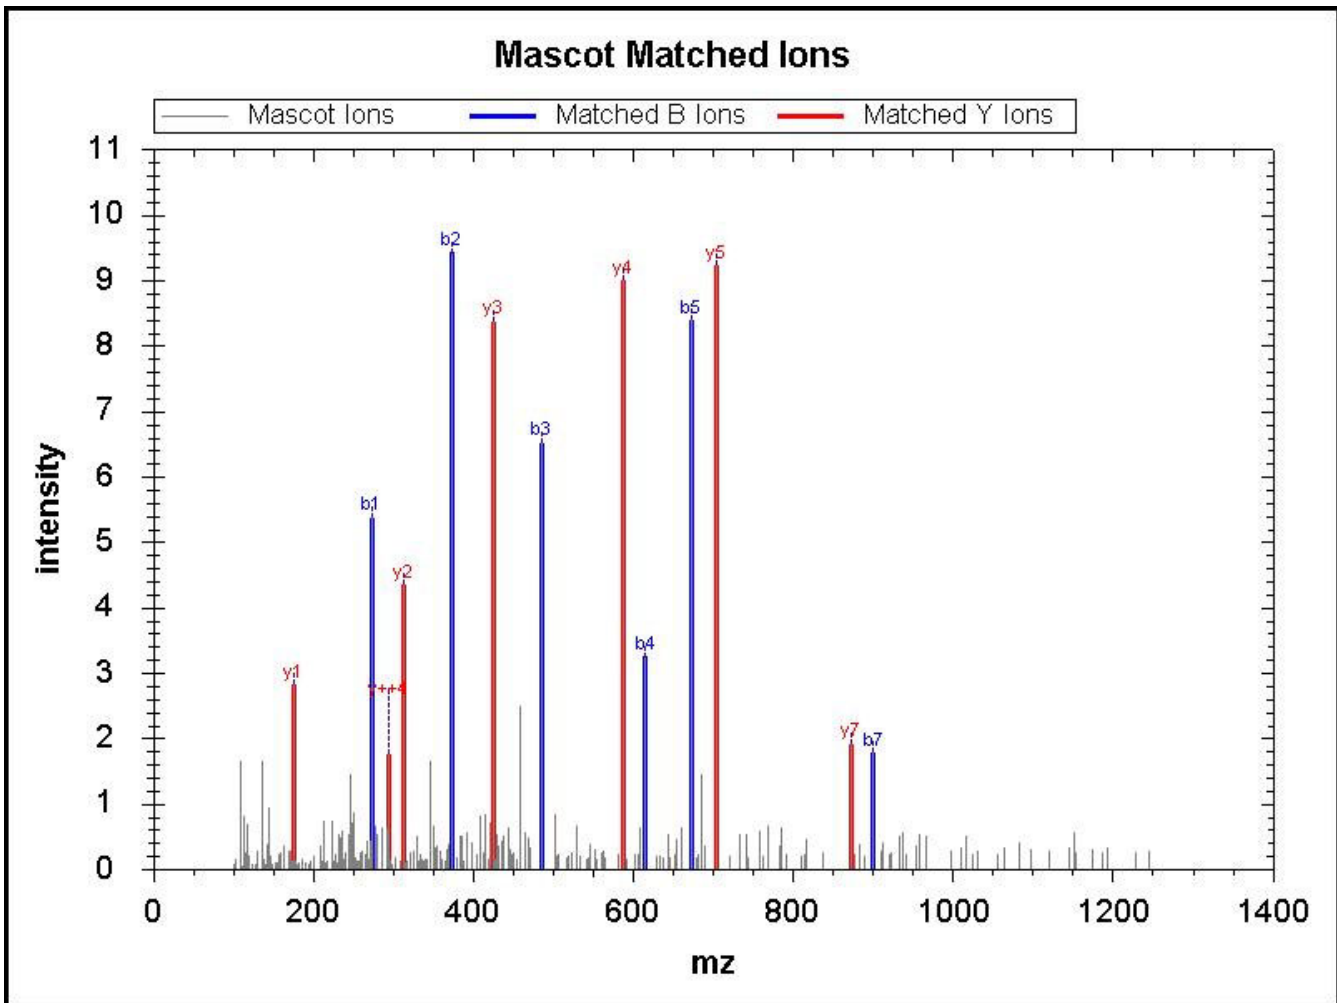

| No | b        | b++    | b0       | b0++   | Seq | y        | y++    | y*       | y*++   | y0       | y0++   | RevNo |
|----|----------|--------|----------|--------|-----|----------|--------|----------|--------|----------|--------|-------|
| 1  | 274.15   | 137.58 | 256.14   | 128.57 | E   |          |        |          |        |          |        | 11    |
| 2  | 373.22   | 187.11 | 355.21   | 178.11 | V   | 1,214.65 | 607.83 | 1,197.63 | 599.32 | 1,196.64 | 598.82 | 10    |
| 3  | 486.30   | 243.66 | 468.29   | 234.65 | L   | 1,115.58 | 558.30 | 1,098.56 | 549.78 | 1,097.57 | 549.29 | 9     |
| 4  | 615.35   | 308.18 | 597.34   | 299.17 | E   | 1,002.50 | 501.75 | 985.47   | 493.24 | 984.49   | 492.75 | 8     |
| 5  | 672.37   | 336.69 | 654.36   | 327.68 | G   | 873.46   | 437.23 | 856.43   | 428.72 | 855.45   | 428.23 | 7     |
| 6  | 785.45   | 393.23 | 767.44   | 384.22 | L   | 816.44   | 408.72 | 799.41   | 400.21 | 798.43   | 399.72 | 6     |
| 7  | 900.48   | 450.74 | 882.47   | 441.74 | D   | 703.35   | 352.18 | 686.33   | 343.67 | 685.34   | 343.17 | 5     |
| 8  | 1,063.54 | 532.28 | 1,045.53 | 523.27 | Y   | 588.33   | 294.67 | 571.30   | 286.15 |          |        | 4     |
| 9  | 1,176.63 | 588.82 | 1,158.62 | 579.81 | L   | 425.26   | 213.13 | 408.24   | 204.62 |          |        | 3     |
| 10 | 1,313.69 | 657.35 | 1,295.68 | 648.34 | H   | 312.18   | 156.59 | 295.15   | 148.08 |          |        | 2     |
| 11 |          |        |          |        | R   | 175.12   | 88.06  | 158.09   | 79.55  |          |        | 1     |

Query 70308 Hit 1

MS/MS Fragmentation of **LMAKCRMLIQENQELGR**

Found in **sp|Q15007|FL2D\_HUMAN**, Pre-mRNA-splicing regulator WTAP OS=Homo sapiens GN=WTAP PE=1 SV=2

Match to Query 70308: 2240.088from(747.7034,3+)

Title: 716: Scan 1592 (rt=45.3874, f=3, i=245) [D:\lab212\membrane\Grace\Joyce\iTRAQ\_34\_2.raw]

Data File: Submitted from 20120508-1(merge) by Mascot Daemon on JOYCE-VAIO

Monoisotopic mass of neutral peptide Mr(calc): 2240.088

Variable modifications:

M2 :Oxidation (M), 63.99828

K4 :iTRAQ4plex (K)

C5 :Methylthio (C)

N12 :Deamidated (NQ)

Q13 :Deamidated (NQ)

Ions Score: 44.71 Expect: 0.030

### Mascot Matched Ions

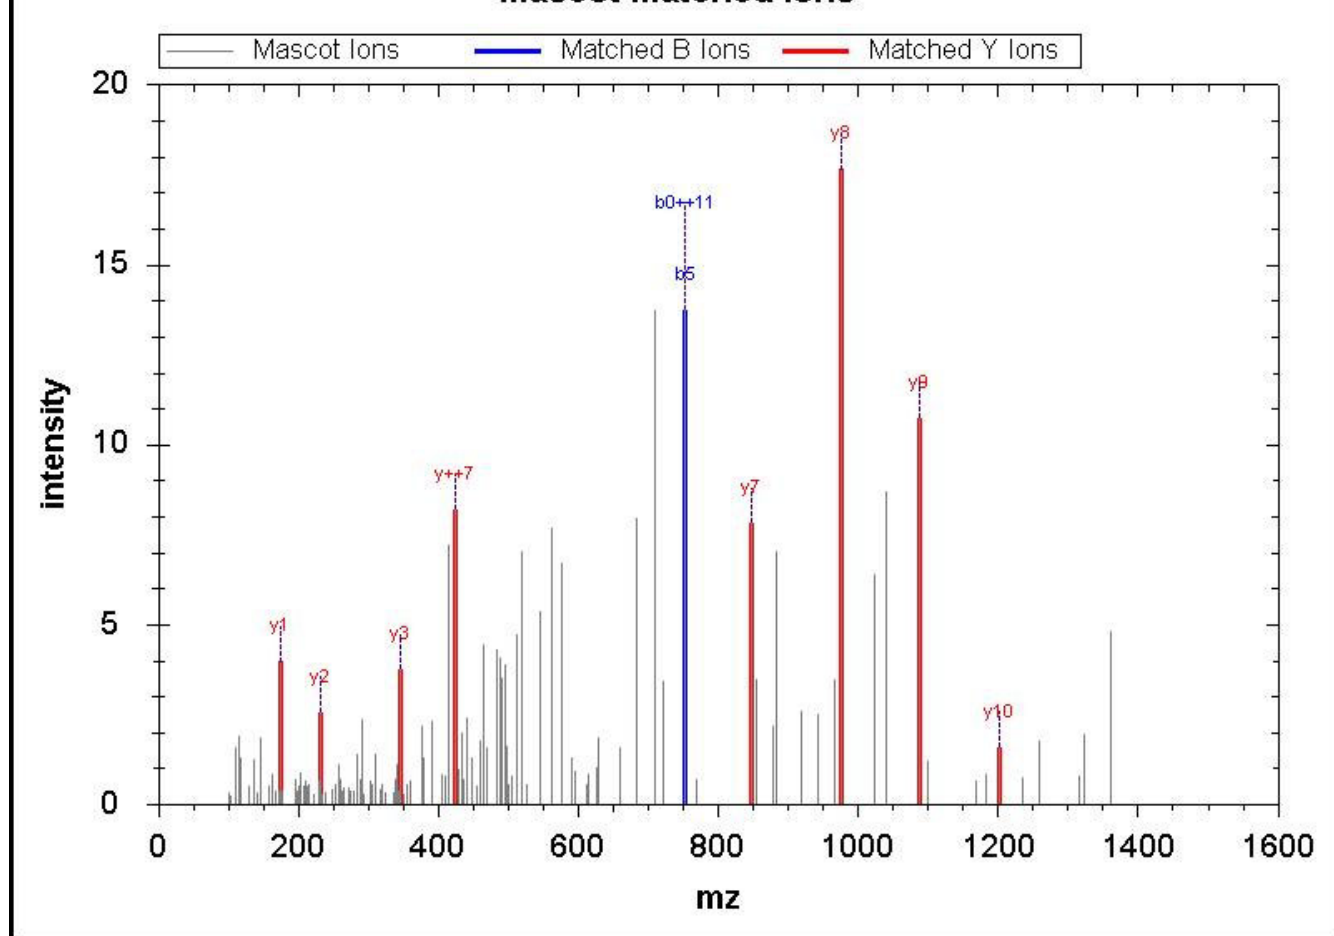

| No | b        | b++      | b*       | b*++     | b0       | b0++     | Seq | y        | y++      | y*       | y*++     | y0       | y0++     | RevNo |
|----|----------|----------|----------|----------|----------|----------|-----|----------|----------|----------|----------|----------|----------|-------|
| 1  | 114.09   | 57.55    |          |          |          |          | L   |          |          |          |          |          |          | 17    |
| 2  | 261.13   | 131.07   |          |          |          |          | M   | 2,128.01 | 1,064.51 | 2,110.99 | 1,056.00 | 2,110.00 | 1,055.51 | 16    |
| 3  | 332.16   | 166.59   |          |          |          |          | A   | 1,980.98 | 990.99   | 1,963.95 | 982.48   | 1,962.97 | 981.99   | 15    |
| 4  | 604.36   | 302.68   | 587.33   | 294.17   |          |          | K   | 1,909.94 | 955.47   | 1,892.92 | 946.96   | 1,891.93 | 946.47   | 14    |
| 5  | 753.36   | 377.18   | 736.33   | 368.67   |          |          | C   | 1,637.74 | 819.38   | 1,620.72 | 810.86   | 1,619.73 | 810.37   | 13    |
| 6  | 909.46   | 455.23   | 892.43   | 446.72   |          |          | R   | 1,488.75 | 744.88   | 1,471.72 | 736.36   | 1,470.74 | 735.87   | 12    |
| 7  | 1,040.50 | 520.75   | 1,023.47 | 512.24   |          |          | M   | 1,332.65 | 666.83   | 1,315.62 | 658.31   | 1,314.64 | 657.82   | 11    |
| 8  | 1,153.58 | 577.30   | 1,136.56 | 568.78   |          |          | L   | 1,201.61 | 601.31   | 1,184.58 | 592.79   | 1,183.60 | 592.30   | 10    |
| 9  | 1,266.67 | 633.84   | 1,249.64 | 625.32   |          |          | I   | 1,088.52 | 544.76   | 1,071.50 | 536.25   | 1,070.51 | 535.76   | 9     |
| 10 | 1,394.73 | 697.87   | 1,377.70 | 689.35   |          |          | Q   | 975.44   | 488.22   | 958.41   | 479.71   | 957.43   | 479.22   | 8     |
| 11 | 1,523.77 | 762.39   | 1,506.74 | 753.87   | 1,505.76 | 753.38   | E   | 847.38   | 424.19   | 830.35   | 415.68   | 829.37   | 415.19   | 7     |
| 12 | 1,638.80 | 819.90   | 1,621.77 | 811.39   | 1,620.79 | 810.90   | N   | 718.34   | 359.67   | 701.31   | 351.16   | 700.33   | 350.67   | 6     |
| 13 | 1,767.84 | 884.42   | 1,750.81 | 875.91   | 1,749.83 | 875.42   | Q   | 603.31   | 302.16   | 586.28   | 293.65   | 585.30   | 293.15   | 5     |
| 14 | 1,896.88 | 948.94   | 1,879.85 | 940.43   | 1,878.87 | 939.94   | E   | 474.27   | 237.64   | 457.24   | 229.12   | 456.26   | 228.63   | 4     |
| 15 | 2,009.97 | 1,005.49 | 1,992.94 | 996.97   | 1,991.95 | 996.48   | L   | 345.22   | 173.12   | 328.20   | 164.60   |          |          | 3     |
| 16 | 2,066.99 | 1,034.00 | 2,049.96 | 1,025.48 | 2,048.98 | 1,024.99 | G   | 232.14   | 116.57   | 215.11   | 108.06   |          |          | 2     |
| 17 |          |          |          |          |          |          | R   | 175.12   | 88.06    | 158.09   | 79.55    |          |          | 1     |

Query 75437 Hit 1

MS/MS Fragmentation of **FIIDEELFGQTHQHELK**

Found in [sp|P46934|NEDD4\\_HUMAN](#), E3 ubiquitin-protein ligase NEDD4 OS=Homo sapiens GN=NEDD4 PE=1 SV=4

Match to Query 75437: 2371.246from(593.8188,4+)

Title: 746: Scan 1729 (rt=48.4058, f=2, i=267) [D:\lab212\membrane\Grace\Joyce\47\_1.raw]

Data File: Submitted from 20120508-1(merge) by Mascot Daemon on JOYCE-VAIO

Monoisotopic mass of neutral peptide Mr(calc): 2371.246



Match to Query 67801: 2178.093from(727.0382,3+)

Title: 1157: Sum of 2 scans in range 2574 (rt=67.3198, f=4, i=781) to 2575 (rt=67.3452, f=4, i=782)

[D:\lab212\membrane\GraceJoyce\iTRAQ\_27\_1.raw]

Data File: Submitted from 20120508-1(merge) by Mascot Daemon on JOYCE-VAIO

Monoisotopic mass of neutral peptide Mr(calc): 2178.093

Variable modifications:

K16 :iTRAQ4plex (K)

Ions Score: 44.62 Expect: 0.032

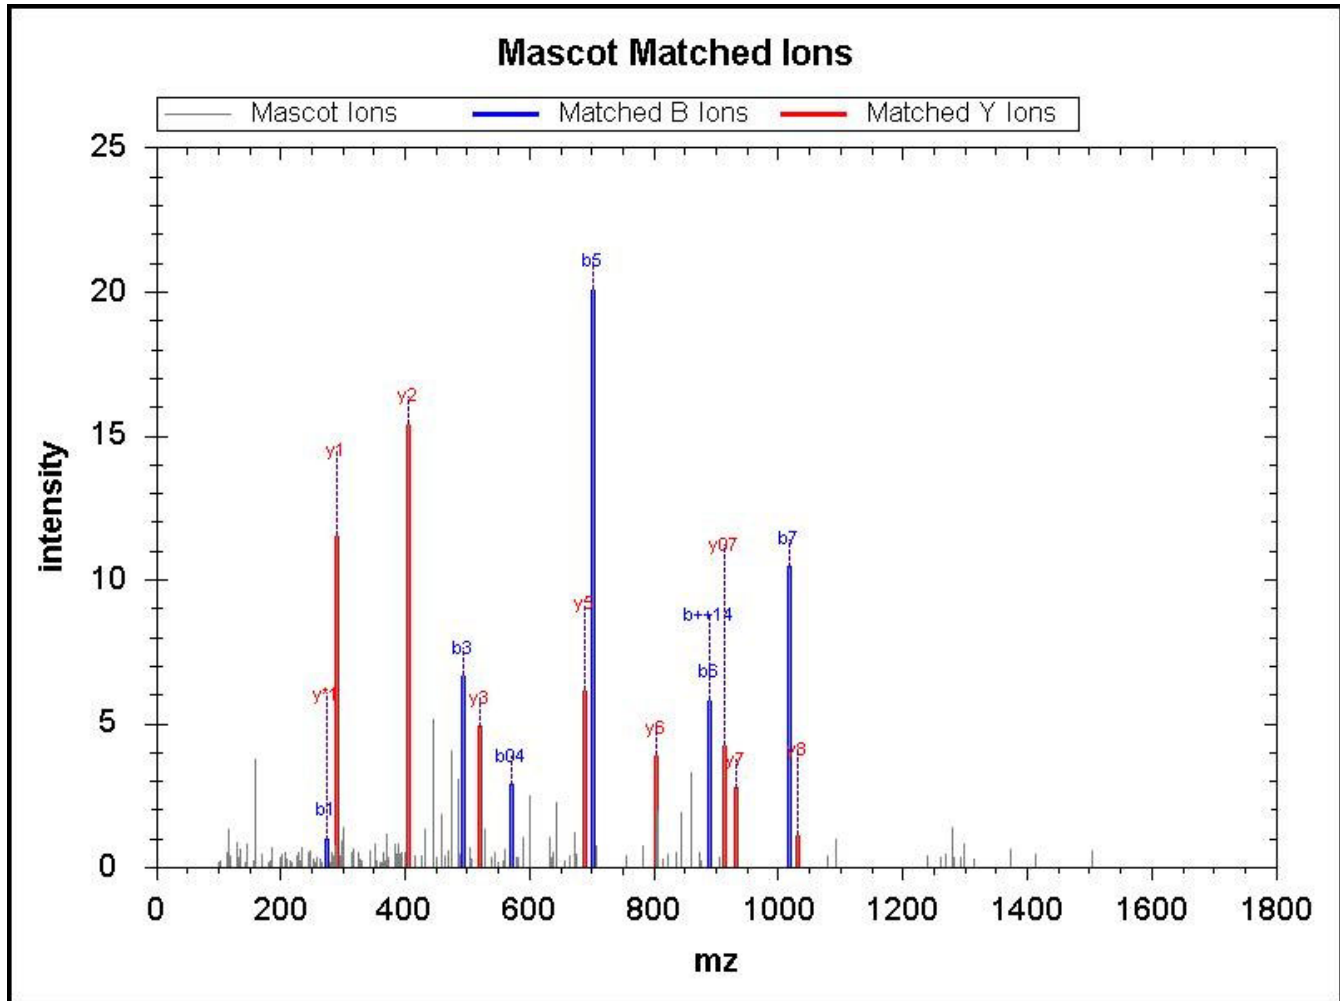

| No | b        | b++    | b*       | b*++   | b0       | b0++   | Seq | y        | y++    | y*       | y*++   | y0       | y0++   | RevNo |
|----|----------|--------|----------|--------|----------|--------|-----|----------|--------|----------|--------|----------|--------|-------|
| 1  | 274.15   | 137.58 |          |        | 256.14   | 128.57 | E   |          |        |          |        |          |        | 16    |
| 2  | 405.19   | 203.10 |          |        | 387.18   | 194.09 | M   | 1,905.96 | 953.48 | 1,888.93 | 944.97 | 1,887.95 | 944.48 | 15    |
| 3  | 492.22   | 246.62 |          |        | 474.21   | 237.61 | S   | 1,774.92 | 887.96 | 1,757.89 | 879.45 | 1,756.91 | 878.96 | 14    |
| 4  | 589.28   | 295.14 |          |        | 571.27   | 286.14 | P   | 1,687.88 | 844.45 | 1,670.86 | 835.93 | 1,669.87 | 835.44 | 13    |
| 5  | 702.36   | 351.68 |          |        | 684.35   | 342.68 | L   | 1,590.83 | 795.92 | 1,573.81 | 787.41 | 1,572.82 | 786.91 | 12    |
| 6  | 888.44   | 444.72 |          |        | 870.43   | 435.72 | W   | 1,477.75 | 739.38 | 1,460.72 | 730.86 | 1,459.74 | 730.37 | 11    |
| 7  | 1,017.48 | 509.25 |          |        | 999.47   | 500.24 | E   | 1,291.67 | 646.34 | 1,274.64 | 637.82 | 1,273.66 | 637.33 | 10    |
| 8  | 1,148.52 | 574.77 |          |        | 1,130.51 | 565.76 | M   | 1,162.63 | 581.82 | 1,145.60 | 573.30 | 1,144.62 | 572.81 | 9     |
| 9  | 1,247.59 | 624.30 |          |        | 1,229.58 | 615.29 | V   | 1,031.59 | 516.30 | 1,014.56 | 507.78 | 1,013.57 | 507.29 | 8     |
| 10 | 1,375.65 | 688.33 | 1,358.62 | 679.82 | 1,357.64 | 679.32 | Q   | 932.52   | 466.76 | 915.49   | 458.25 | 914.51   | 457.76 | 7     |
| 11 | 1,490.68 | 745.84 | 1,473.65 | 737.33 | 1,472.67 | 736.84 | D   | 804.46   | 402.73 | 787.43   | 394.22 | 786.45   | 393.73 | 6     |
| 12 | 1,547.70 | 774.35 | 1,530.67 | 765.84 | 1,529.69 | 765.35 | G   | 689.43   | 345.22 | 672.40   | 336.71 | 671.42   | 336.21 | 5     |
| 13 | 1,660.78 | 830.90 | 1,643.76 | 822.38 | 1,642.77 | 821.89 | I   | 632.41   | 316.71 | 615.38   | 308.20 | 614.40   | 307.70 | 4     |
| 14 | 1,775.81 | 888.41 | 1,758.78 | 879.90 | 1,757.80 | 879.40 | D   | 519.33   | 260.17 | 502.30   | 251.65 | 501.32   | 251.16 | 3     |
| 15 | 1,888.89 | 944.95 | 1,871.87 | 936.44 | 1,870.88 | 935.95 | L   | 404.30   | 202.65 | 387.27   | 194.14 |          |        | 2     |
| 16 |          |        |          |        |          |        | K   | 291.21   | 146.11 | 274.19   | 137.60 |          |        | 1     |

Query 19521 Hit 1

MS/MS Fragmentation of **LLDFLNVK**

Found in **sp|Q8NDZ4|CC058\_HUMAN**, UPF0672 protein C3orf58 OS=Homo sapiens GN=C3orf58 PE=1 SV=1

Match to Query 19521: 1248.77 from (625.3923, 2+)

Title: 915: Scan 2090 (rt=56.2476, f=3, i=310) [D:\lab212\membrane\Grace\Joyce\iTRAQ\_30\_1.raw]

Data File: Submitted from 20120508-1(merge) by Mascot Daemon on JOYCE-VAIO

Monoisotopic mass of neutral peptide Mr(calc): 1248.77

Variable modifications:

K8 iTRAQ4plex (K)

Ions Score: 44.61 Expect: 0.018

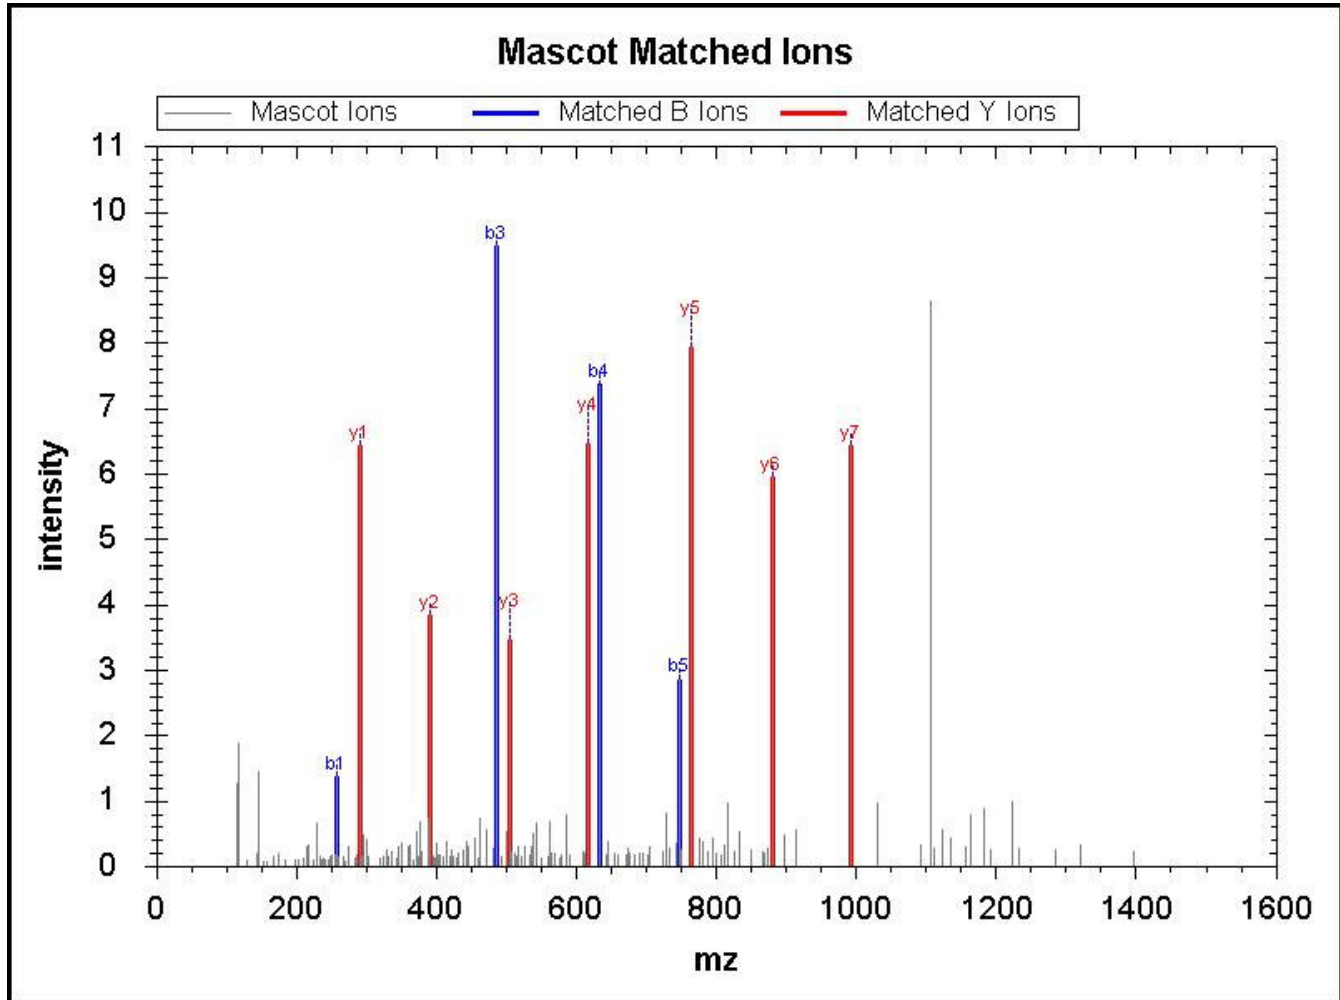

| No | b      | b++    | b*     | b*++   | b0     | b0++   | Seq | y      | y++    | y*     | y*++   | y0     | y0++   | RevNo |
|----|--------|--------|--------|--------|--------|--------|-----|--------|--------|--------|--------|--------|--------|-------|
| 1  | 258.19 | 129.60 |        |        |        |        | L   |        |        |        |        |        |        | 8     |
| 2  | 371.28 | 186.14 |        |        |        |        | L   | 992.59 | 496.80 | 975.56 | 488.29 | 974.58 | 487.79 | 7     |
| 3  | 486.30 | 243.66 |        |        | 468.29 | 234.65 | D   | 879.51 | 440.26 | 862.48 | 431.74 | 861.50 | 431.25 | 6     |
| 4  | 633.37 | 317.19 |        |        | 615.36 | 308.18 | F   | 764.48 | 382.74 | 747.45 | 374.23 |        |        | 5     |
| 5  | 746.46 | 373.73 |        |        | 728.45 | 364.73 | L   | 617.41 | 309.21 | 600.38 | 300.70 |        |        | 4     |
| 6  | 860.50 | 430.75 | 843.47 | 422.24 | 842.49 | 421.75 | N   | 504.33 | 252.67 | 487.30 | 244.15 |        |        | 3     |
| 7  | 959.57 | 480.29 | 942.54 | 471.77 | 941.56 | 471.28 | V   | 390.28 | 195.65 | 373.26 | 187.13 |        |        | 2     |
| 8  |        |        |        |        |        |        | K   | 291.21 | 146.11 | 274.19 | 137.60 |        |        | 1     |

Query 65934 Hit 1

MS/MS Fragmentation of **EELMAPTLLPELHLLK**

Found in **sp|Q9H1A4|APC1\_HUMAN**, Anaphase-promoting complex subunit 1 OS=Homo sapiens GN=ANAPC1 PE=1 SV=1

Match to Query 65934: 2134.233 from (712.4184, 3+)

Title: 915: Sum of 2 scans in range 2206 (rt=58.1632, f=4, i=609) to 2207 (rt=58.1886, f=4, i=610)

[D:\lab212\membrane\Grace\Joyce\iTRAQ\_34\_1.raw]

Data File: Submitted from 20120508-1(merge) by Mascot Daemon on JOYCE-VAIO

Monoisotopic mass of neutral peptide Mr(calc): 2134.233

Variable modifications:

K16 iTRAQ4plex (K)

Ions Score: 44.57 Expect: 0.014

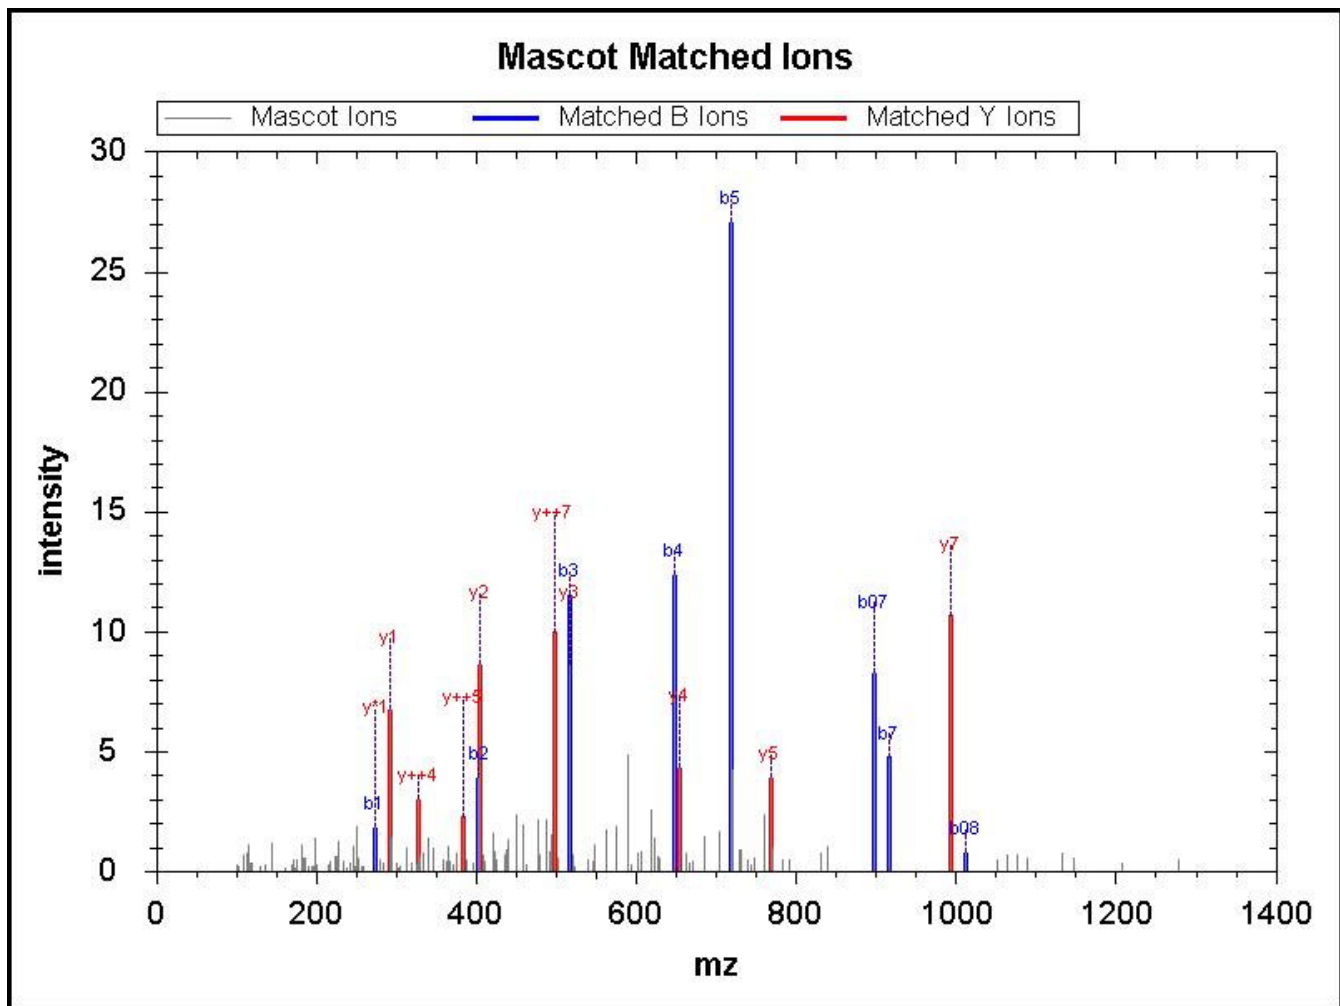

| No | b        | b++    | b0       | b0++   | Seq | y        | y++    | y*       | y*++   | y0       | y0++   | RevNo |
|----|----------|--------|----------|--------|-----|----------|--------|----------|--------|----------|--------|-------|
| 1  | 274.15   | 137.58 | 256.14   | 128.57 | E   |          |        |          |        |          |        | 16    |
| 2  | 403.19   | 202.10 | 385.18   | 193.10 | E   | 1,862.09 | 931.55 | 1,845.07 | 923.04 | 1,844.08 | 922.55 | 15    |
| 3  | 516.28   | 258.64 | 498.27   | 249.64 | L   | 1,733.05 | 867.03 | 1,716.03 | 858.52 | 1,715.04 | 858.02 | 14    |
| 4  | 647.32   | 324.16 | 629.31   | 315.16 | M   | 1,619.97 | 810.49 | 1,602.94 | 801.97 | 1,601.96 | 801.48 | 13    |
| 5  | 718.36   | 359.68 | 700.35   | 350.68 | A   | 1,488.93 | 744.97 | 1,471.90 | 736.45 | 1,470.92 | 735.96 | 12    |
| 6  | 815.41   | 408.21 | 797.40   | 399.20 | P   | 1,417.89 | 709.45 | 1,400.86 | 700.94 | 1,399.88 | 700.44 | 11    |
| 7  | 916.46   | 458.73 | 898.45   | 449.73 | T   | 1,320.84 | 660.92 | 1,303.81 | 652.41 | 1,302.83 | 651.92 | 10    |
| 8  | 1,029.54 | 515.27 | 1,011.53 | 506.27 | L   | 1,219.79 | 610.40 | 1,202.76 | 601.89 | 1,201.78 | 601.39 | 9     |
| 9  | 1,142.62 | 571.82 | 1,124.61 | 562.81 | L   | 1,106.71 | 553.86 | 1,089.68 | 545.34 | 1,088.69 | 544.85 | 8     |
| 10 | 1,239.68 | 620.34 | 1,221.67 | 611.34 | P   | 993.62   | 497.31 | 976.59   | 488.80 | 975.61   | 488.31 | 7     |
| 11 | 1,368.72 | 684.86 | 1,350.71 | 675.86 | E   | 896.57   | 448.79 | 879.54   | 440.27 | 878.56   | 439.78 | 6     |
| 12 | 1,481.80 | 741.41 | 1,463.79 | 732.40 | L   | 767.53   | 384.27 | 750.50   | 375.75 |          |        | 5     |
| 13 | 1,618.86 | 809.94 | 1,600.85 | 800.93 | H   | 654.44   | 327.72 | 637.42   | 319.21 |          |        | 4     |
| 14 | 1,731.95 | 866.48 | 1,713.94 | 857.47 | L   | 517.38   | 259.20 | 500.36   | 250.68 |          |        | 3     |
| 15 | 1,845.03 | 923.02 | 1,827.02 | 914.01 | L   | 404.30   | 202.65 | 387.27   | 194.14 |          |        | 2     |
| 16 |          |        |          |        | K   | 291.21   | 146.11 | 274.19   | 137.60 |          |        | 1     |

Query 16624 Hit 1

MS/MS Fragmentation of GSFLKEKNK

Found in sp|Q96QE3|ATAD5\_HUMAN, ATPase family AAA domain-containing protein 5 OS=Homo sapiens GN=ATAD5 PE=1 SV=4

Match to Query 16624: 1193.662from(597.8385,2+)

Title: 197: Scan 543 (rt=21.5808, f=2, i=77) [D:\lab212\membrane\GraceJoyce\iTRAQ\_31\_2.raw]

Data File:Submitted from 20120508-1(merge) by Mascot Daemon on JOYCE-VAIO

Monoisotopic mass of neutral peptide Mr(calc): 1193.662

Variable modifications:

K9 iTRAQ4plex (K)

Ions Score: 44.47 Expect: 0.028

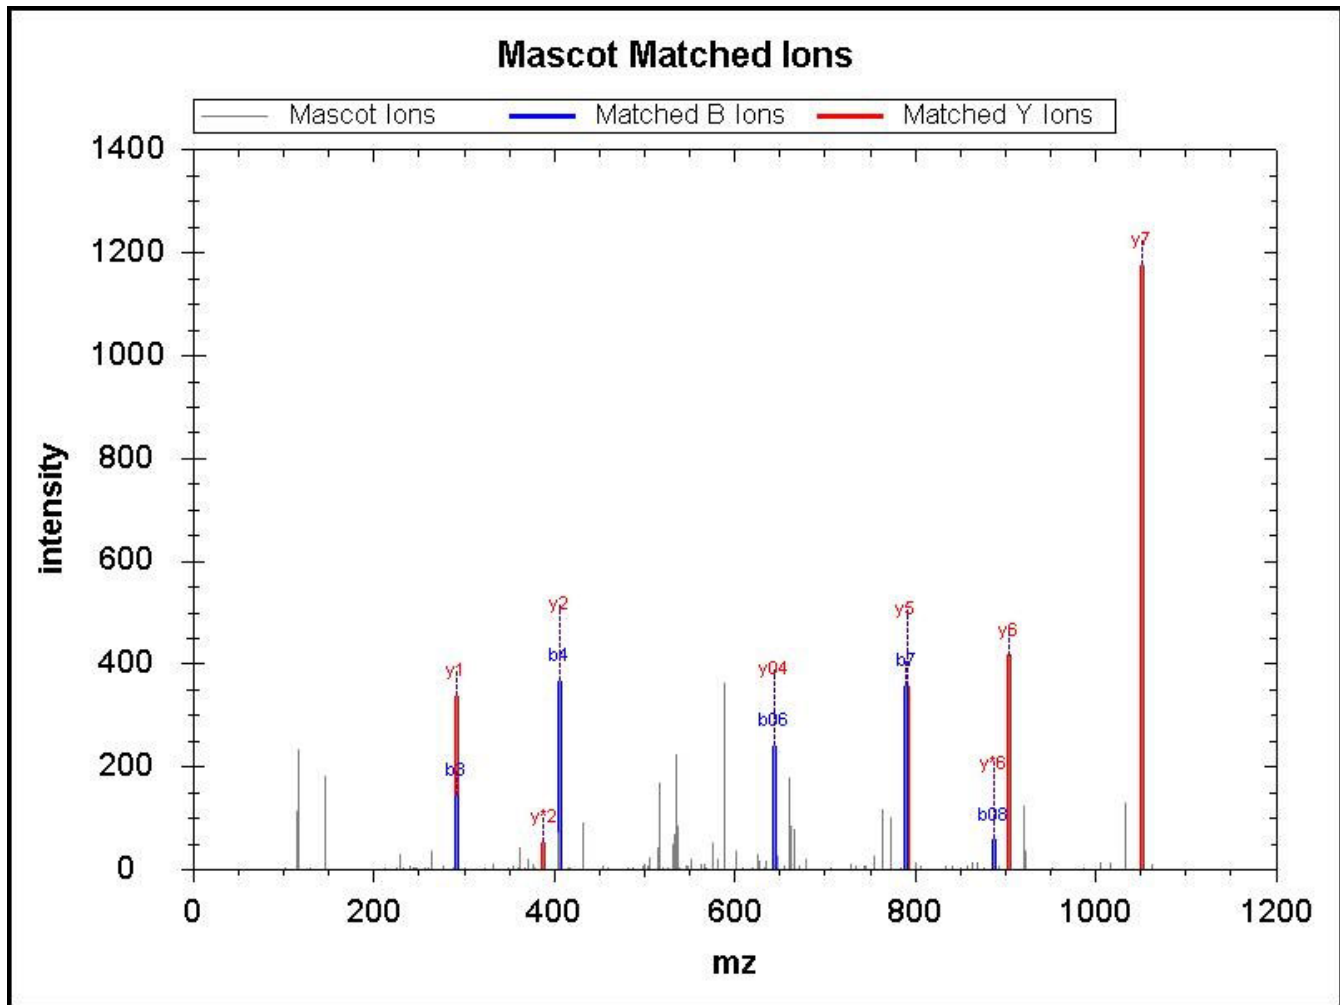

| No | b      | b++    | b*     | b*++   | b0     | b0++   | Seq | y        | y++    | y*       | y*++   | y0       | y0++   | RevNo |
|----|--------|--------|--------|--------|--------|--------|-----|----------|--------|----------|--------|----------|--------|-------|
| 1  | 58.03  | 29.52  |        |        |        |        | G   |          |        |          |        |          |        | 9     |
| 2  | 145.06 | 73.03  |        |        | 127.05 | 64.03  | S   | 1,137.67 | 569.34 | 1,120.65 | 560.83 | 1,119.66 | 560.34 | 8     |
| 3  | 292.13 | 146.57 |        |        | 274.12 | 137.56 | F   | 1,050.64 | 525.83 | 1,033.62 | 517.31 | 1,032.63 | 516.82 | 7     |
| 4  | 405.21 | 203.11 |        |        | 387.20 | 194.10 | L   | 903.57   | 452.29 | 886.55   | 443.78 | 885.56   | 443.29 | 6     |
| 5  | 533.31 | 267.16 | 516.28 | 258.64 | 515.30 | 258.15 | K   | 790.49   | 395.75 | 773.46   | 387.24 | 772.48   | 386.74 | 5     |
| 6  | 662.35 | 331.68 | 645.32 | 323.17 | 644.34 | 322.67 | E   | 662.40   | 331.70 | 645.37   | 323.19 | 644.38   | 322.70 | 4     |
| 7  | 790.45 | 395.73 | 773.42 | 387.21 | 772.44 | 386.72 | K   | 533.35   | 267.18 | 516.33   | 258.67 |          |        | 3     |
| 8  | 904.49 | 452.75 | 887.46 | 444.23 | 886.48 | 443.74 | N   | 405.26   | 203.13 | 388.23   | 194.62 |          |        | 2     |
| 9  |        |        |        |        |        |        | K   | 291.21   | 146.11 | 274.19   | 137.60 |          |        | 1     |

Query 32304 Hit 1

MS/MS Fragmentation of **LGFDVVFNYK**

Found in **sp|Q14914|PTGR1\_HUMAN**, Prostaglandin reductase 1 OS=Homo sapiens GN=PTGR1 PE=1 SV=2

Match to Query 32304: 1488.82from(745.4172,2+)

Title: 839: Sum of 2 scans in range 1930 (rt=52.6445, f=4, i=563) to 1931 (rt=52.6699, f=4, i=564)

[D:\lab212\membrane\GraceJoyce\iTRAQ\_30\_1.raw]

Data File:Submitted from 20120508-1(merge) by Mascot Daemon on JOYCE-VAIO

Monoisotopic mass of neutral peptide Mr(calc): 1488.82

Variable modifications:

K10 iTRAQ4plex (K)





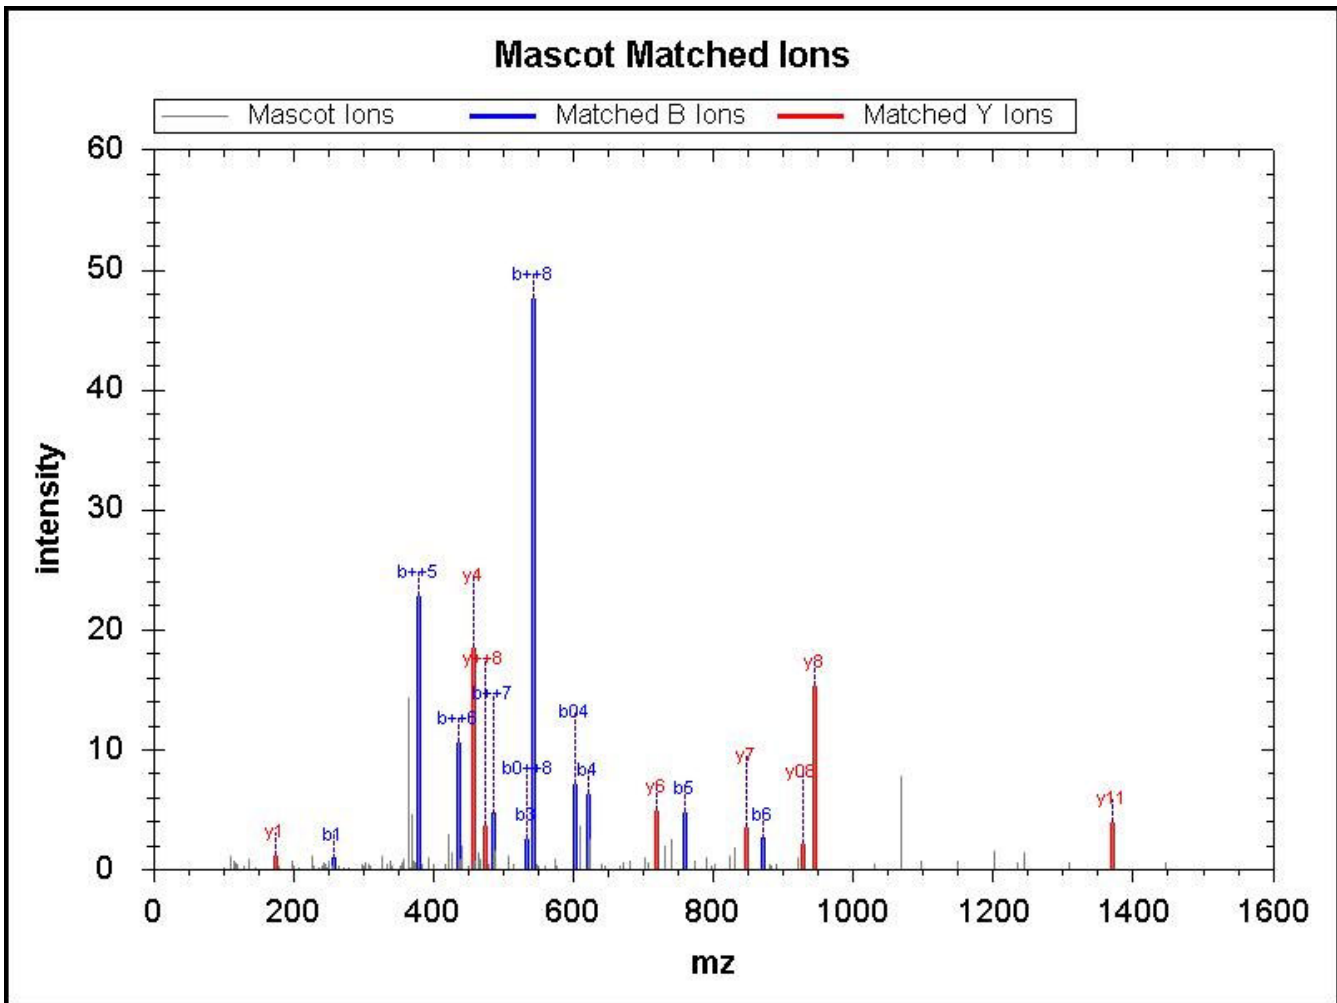

| No | b        | b++      | b*       | b*++     | b0       | b0++     | Seq | y        | y++      | y*       | y*++     | y0       | y0++     | RevNo |
|----|----------|----------|----------|----------|----------|----------|-----|----------|----------|----------|----------|----------|----------|-------|
| 1  | 258.19   | 129.60   |          |          |          |          | I   |          |          |          |          |          |          | 18    |
| 2  | 371.28   | 186.14   |          |          |          |          | L   | 2,082.99 | 1,042.00 | 2,065.97 | 1,033.49 | 2,064.98 | 1,032.99 | 17    |
| 3  | 534.34   | 267.67   |          |          |          |          | Y   | 1,969.91 | 985.46   | 1,952.88 | 976.94   | 1,951.90 | 976.45   | 16    |
| 4  | 621.37   | 311.19   |          |          | 603.36   | 302.18   | S   | 1,806.84 | 903.93   | 1,789.82 | 895.41   | 1,788.83 | 894.92   | 15    |
| 5  | 758.43   | 379.72   |          |          | 740.42   | 370.71   | H   | 1,719.81 | 860.41   | 1,702.79 | 851.90   | 1,701.80 | 851.40   | 14    |
| 6  | 871.52   | 436.26   |          |          | 853.51   | 427.26   | L   | 1,582.75 | 791.88   | 1,565.73 | 783.37   | 1,564.74 | 782.88   | 13    |
| 7  | 970.58   | 485.80   |          |          | 952.57   | 476.79   | V   | 1,469.67 | 735.34   | 1,452.64 | 726.83   | 1,451.66 | 726.33   | 12    |
| 8  | 1,085.61 | 543.31   |          |          | 1,067.60 | 534.30   | D   | 1,370.60 | 685.80   | 1,353.57 | 677.29   | 1,352.59 | 676.80   | 11    |
| 9  | 1,248.67 | 624.84   |          |          | 1,230.66 | 615.84   | Y   | 1,255.57 | 628.29   | 1,238.55 | 619.78   | 1,237.56 | 619.29   | 10    |
| 10 | 1,395.74 | 698.38   |          |          | 1,377.73 | 689.37   | F   | 1,092.51 | 546.76   | 1,075.48 | 538.25   | 1,074.50 | 537.75   | 9     |
| 11 | 1,492.80 | 746.90   |          |          | 1,474.79 | 737.90   | P   | 945.44   | 473.22   | 928.42   | 464.71   | 927.43   | 464.22   | 8     |
| 12 | 1,621.84 | 811.42   |          |          | 1,603.83 | 802.42   | E   | 848.39   | 424.70   | 831.36   | 416.19   | 830.38   | 415.69   | 7     |
| 13 | 1,768.91 | 884.96   |          |          | 1,750.90 | 875.95   | F   | 719.35   | 360.18   | 702.32   | 351.66   | 701.34   | 351.17   | 6     |
| 14 | 1,883.93 | 942.47   |          |          | 1,865.92 | 933.47   | D   | 572.28   | 286.64   | 555.25   | 278.13   | 554.27   | 277.64   | 5     |
| 15 | 1,940.96 | 970.98   |          |          | 1,922.94 | 961.98   | G   | 457.25   | 229.13   | 440.23   | 220.62   |          |          | 4     |
| 16 | 2,038.01 | 1,019.51 |          |          | 2,020.00 | 1,010.50 | P   | 400.23   | 200.62   | 383.20   | 192.11   |          |          | 3     |
| 17 | 2,166.07 | 1,083.54 | 2,149.04 | 1,075.02 | 2,148.06 | 1,074.53 | Q   | 303.18   | 152.09   | 286.15   | 143.58   |          |          | 2     |
| 18 |          |          |          |          |          |          | R   | 175.12   | 88.06    | 158.09   | 79.55    |          |          | 1     |

Query 63891 Hit 1

MS/MS Fragmentation of **LPLQMALTELETLAEK**

Found in **sp|O15013|ARHGA\_HUMAN**, Rho guanine nucleotide exchange factor 10 OS=Homo sapiens GN=ARHGEF10 PE=1 SV=4

Match to Query 63891: 2087.181 from (696.7342, 3+)

Title: 1418: Sum of 2 scans in range 3154 (rt=80.1871, f=2, i=527) to 3155 (rt=80.2125, f=2, i=528)



MS/MS Fragmentation of **FLVGPDPGVPVR**

Found in **sp|P11352|GPX1\_MOUSE**, Glutathione peroxidase 1 OS=Mus musculus GN=Gpx1 PE=1 SV=2

Match to Query 22141: 1298.747from(650.3807,2+)

Title: 537: Scan 1367 (rt=39.9765, f=3, i=200) [D:\lab212\membrane\Grace\Joyce\iTRAQ\_21\_2.raw]

Data File: Submitted from 20120508-1(merge) by Mascot Daemon on JOYCE-VAIO

Monoisotopic mass of neutral peptide Mr(calc): 1298.747

Variable modifications:

Ions Score: 44.3 Expect: 0.021

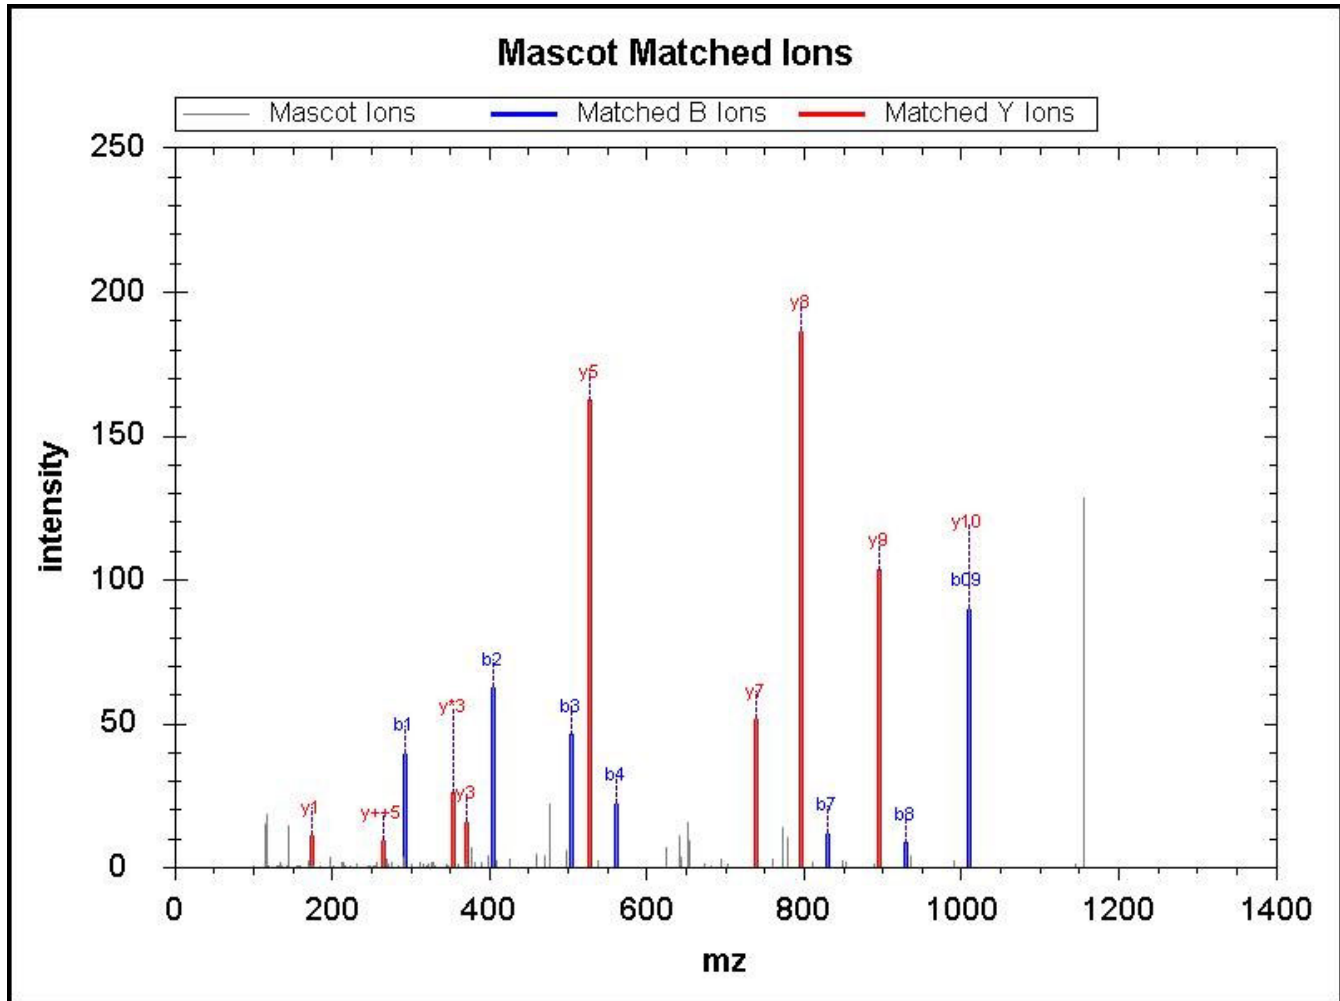

| No | b        | b++    | b0       | b0++   | Seq | y        | y++    | y*     | y*++   | y0     | y0++   | RevNo |
|----|----------|--------|----------|--------|-----|----------|--------|--------|--------|--------|--------|-------|
| 1  | 292.18   | 146.59 |          |        | F   |          |        |        |        |        |        | 11    |
| 2  | 405.26   | 203.13 |          |        | L   | 1,008.58 | 504.80 | 991.56 | 496.28 | 990.57 | 495.79 | 10    |
| 3  | 504.33   | 252.67 |          |        | V   | 895.50   | 448.25 | 878.47 | 439.74 | 877.49 | 439.25 | 9     |
| 4  | 561.35   | 281.18 |          |        | G   | 796.43   | 398.72 | 779.40 | 390.21 | 778.42 | 389.71 | 8     |
| 5  | 658.40   | 329.71 |          |        | P   | 739.41   | 370.21 | 722.38 | 361.70 | 721.40 | 361.20 | 7     |
| 6  | 773.43   | 387.22 | 755.42   | 378.21 | D   | 642.36   | 321.68 | 625.33 | 313.17 | 624.35 | 312.68 | 6     |
| 7  | 830.45   | 415.73 | 812.44   | 406.72 | G   | 527.33   | 264.17 | 510.30 | 255.66 |        |        | 5     |
| 8  | 929.52   | 465.26 | 911.51   | 456.26 | V   | 470.31   | 235.66 | 453.28 | 227.14 |        |        | 4     |
| 9  | 1,026.57 | 513.79 | 1,008.56 | 504.79 | P   | 371.24   | 186.12 | 354.21 | 177.61 |        |        | 3     |
| 10 | 1,125.64 | 563.32 | 1,107.63 | 554.32 | V   | 274.19   | 137.60 | 257.16 | 129.08 |        |        | 2     |
| 11 |          |        |          |        | R   | 175.12   | 88.06  | 158.09 | 79.55  |        |        | 1     |

Query 12875 Hit 1

MS/MS Fragmentation of **LPVGPESHK**

Found in **sp|O95182|NDUA7\_HUMAN**, NADH dehydrogenase [ubiquinone] 1 alpha subcomplex subunit 7 OS=Homo sapiens

GN=NDUFA7 PE=1 SV=3

Match to Query 12875: 1121.68from(374.9007,3+)

Title: 194: Scan 499 (rt=20.8528, f=3, i=69) [D:\lab212\membrane\Grace\Joyce\iTRAQ\_45\_2.raw]  
 Data File: Submitted from 20120508-1(merge) by Mascot Daemon on JOYCE-VAIO  
 Monoisotopic mass of neutral peptide Mr(calc): 1121.68  
 Variable modifications:  
 K8 iTRAQ4plex (K)  
 Ions Score: 44.25 Expect: 0.022

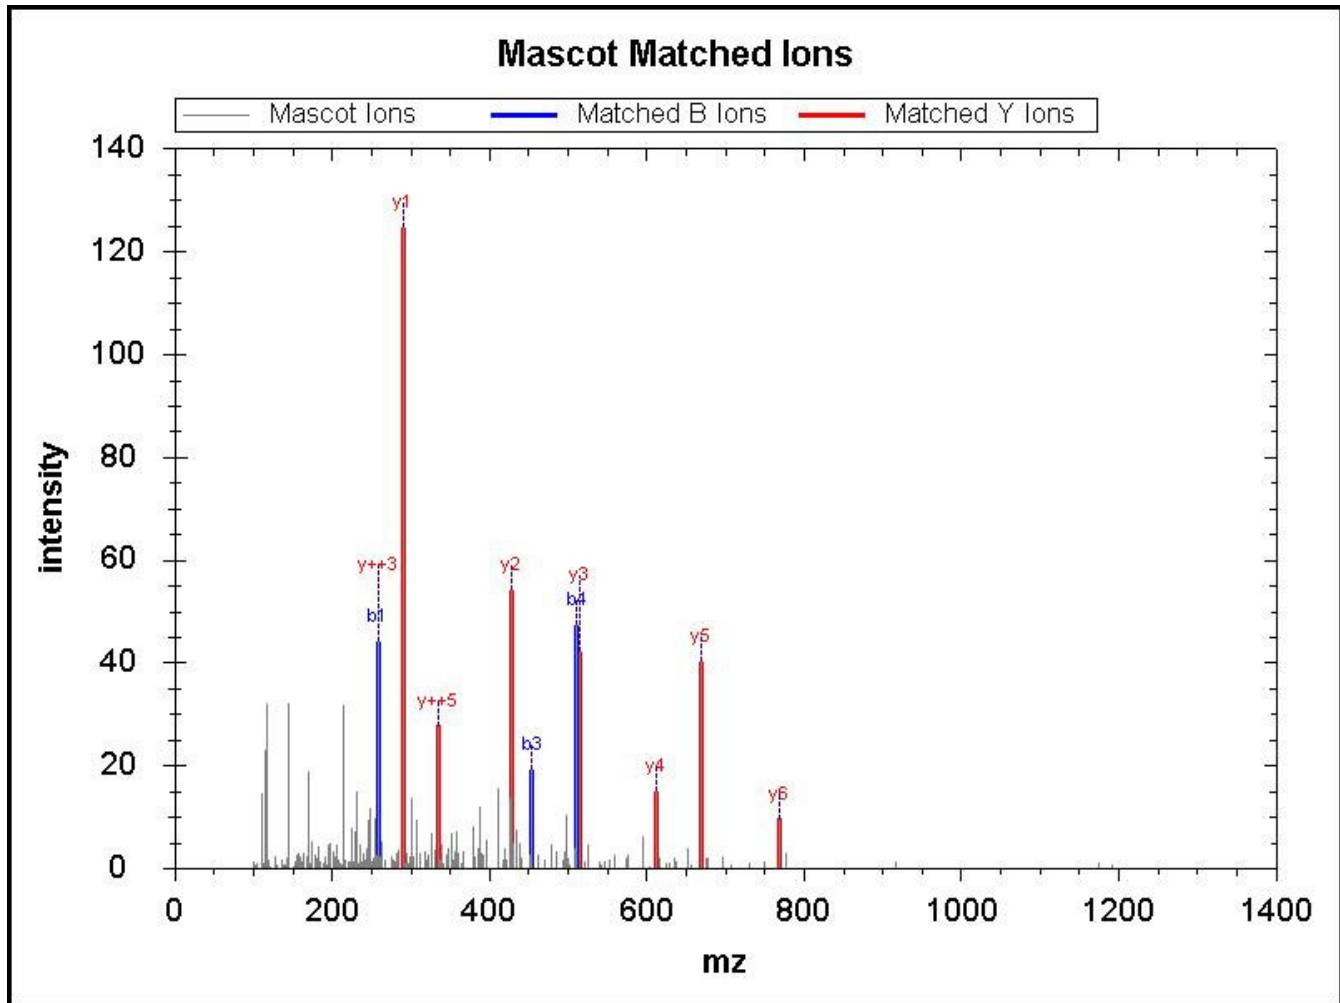

| No | b      | b++    | b0     | b0++   | Seq | y      | y++    | y*     | y*++   | y0     | y0++   | RevNo |
|----|--------|--------|--------|--------|-----|--------|--------|--------|--------|--------|--------|-------|
| 1  | 258.19 | 129.60 |        |        | L   |        |        |        |        |        |        | 8     |
| 2  | 355.25 | 178.13 |        |        | P   | 865.50 | 433.25 | 848.47 | 424.74 | 847.49 | 424.25 | 7     |
| 3  | 454.31 | 227.66 |        |        | V   | 768.45 | 384.73 | 751.42 | 376.21 | 750.44 | 375.72 | 6     |
| 4  | 511.34 | 256.17 |        |        | G   | 669.38 | 335.19 | 652.35 | 326.68 | 651.37 | 326.19 | 5     |
| 5  | 608.39 | 304.70 |        |        | P   | 612.36 | 306.68 | 595.33 | 298.17 | 594.35 | 297.68 | 4     |
| 6  | 695.42 | 348.21 | 677.41 | 339.21 | S   | 515.31 | 258.16 | 498.28 | 249.64 | 497.30 | 249.15 | 3     |
| 7  | 832.48 | 416.74 | 814.47 | 407.74 | H   | 428.27 | 214.64 | 411.25 | 206.13 |        |        | 2     |
| 8  |        |        |        |        | K   | 291.21 | 146.11 | 274.19 | 137.60 |        |        | 1     |

Query 53101 Hit 1

MS/MS Fragmentation of **SFLINFIHTLENQR**

Found in **sp|O15031|PLXB2\_HUMAN**, Plexin-B2 OS=Homo sapiens GN=PLXNB2 PE=1 SV=3

Match to Query 53101: 1875.014from(626.012,3+)

Title: 1131: Sum of 2 scans in range 2495 (rt=65.5814, f=4, i=743) to 2496 (rt=65.6068, f=4, i=744)

[D:\lab212\membrane\Grace\Joyce\iTRAQ\_36\_2.raw]

Data File: Submitted from 20120508-1(merge) by Mascot Daemon on JOYCE-VAIO

Monoisotopic mass of neutral peptide Mr(calc): 1875.014

Variable modifications:

Ions Score: 44.22 Expect: 0.032

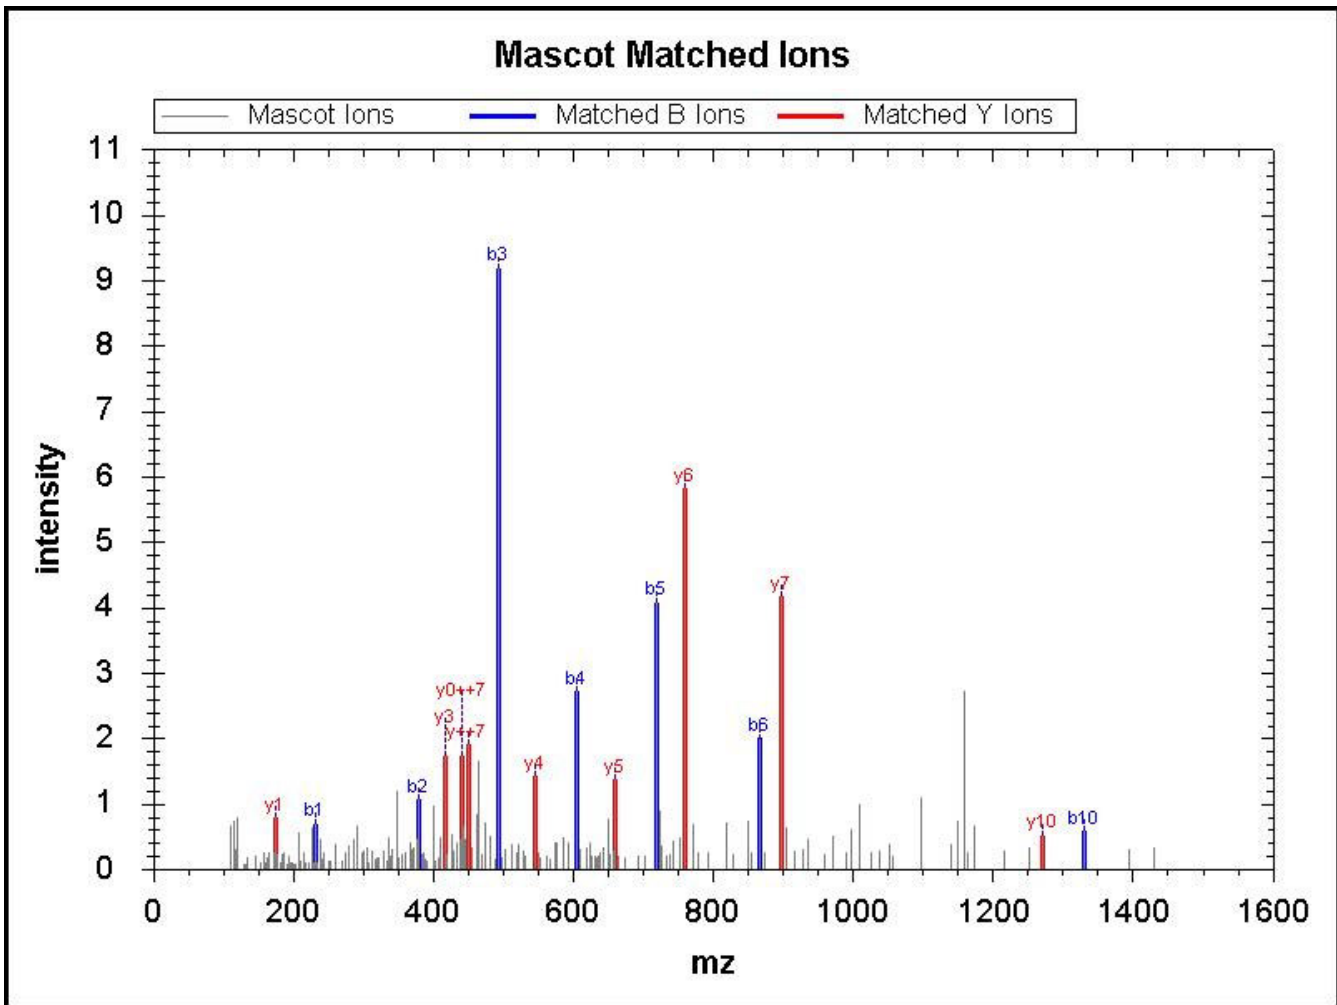

| No | b        | b++    | b*       | b*++   | b0       | b0++   | Seq | y        | y++    | y*       | y*++   | y0       | y0++   | RevNo |
|----|----------|--------|----------|--------|----------|--------|-----|----------|--------|----------|--------|----------|--------|-------|
| 1  | 232.14   | 116.57 |          |        | 214.13   | 107.57 | S   |          |        |          |        |          |        | 14    |
| 2  | 379.21   | 190.11 |          |        | 361.20   | 181.10 | F   | 1,644.89 | 822.95 | 1,627.86 | 814.43 | 1,626.88 | 813.94 | 13    |
| 3  | 492.29   | 246.65 |          |        | 474.28   | 237.65 | L   | 1,497.82 | 749.41 | 1,480.79 | 740.90 | 1,479.81 | 740.41 | 12    |
| 4  | 605.38   | 303.19 |          |        | 587.37   | 294.19 | I   | 1,384.73 | 692.87 | 1,367.71 | 684.36 | 1,366.72 | 683.86 | 11    |
| 5  | 719.42   | 360.21 | 702.39   | 351.70 | 701.41   | 351.21 | N   | 1,271.65 | 636.33 | 1,254.62 | 627.81 | 1,253.64 | 627.32 | 10    |
| 6  | 866.49   | 433.75 | 849.46   | 425.23 | 848.48   | 424.74 | F   | 1,157.61 | 579.31 | 1,140.58 | 570.79 | 1,139.60 | 570.30 | 9     |
| 7  | 979.57   | 490.29 | 962.55   | 481.78 | 961.56   | 481.28 | I   | 1,010.54 | 505.77 | 993.51   | 497.26 | 992.53   | 496.77 | 8     |
| 8  | 1,116.63 | 558.82 | 1,099.61 | 550.31 | 1,098.62 | 549.81 | H   | 897.45   | 449.23 | 880.43   | 440.72 | 879.44   | 440.23 | 7     |
| 9  | 1,217.68 | 609.34 | 1,200.65 | 600.83 | 1,199.67 | 600.34 | T   | 760.39   | 380.70 | 743.37   | 372.19 | 742.38   | 371.70 | 6     |
| 10 | 1,330.76 | 665.89 | 1,313.74 | 657.37 | 1,312.75 | 656.88 | L   | 659.35   | 330.18 | 642.32   | 321.66 | 641.34   | 321.17 | 5     |
| 11 | 1,459.81 | 730.41 | 1,442.78 | 721.89 | 1,441.80 | 721.40 | E   | 546.26   | 273.64 | 529.24   | 265.12 | 528.25   | 264.63 | 4     |
| 12 | 1,573.85 | 787.43 | 1,556.82 | 778.92 | 1,555.84 | 778.42 | N   | 417.22   | 209.11 | 400.19   | 200.60 |          |        | 3     |
| 13 | 1,701.91 | 851.46 | 1,684.88 | 842.94 | 1,683.90 | 842.45 | Q   | 303.18   | 152.09 | 286.15   | 143.58 |          |        | 2     |
| 14 |          |        |          |        |          |        | R   | 175.12   | 88.06  | 158.09   | 79.55  |          |        | 1     |

Query 14126 Hit 1

MS/MS Fragmentation of **AVGAQASVGSR**

Found in **sp|Q9NWX8|BABAI\_HUMAN**, BRISC and BRCA1-A complex member 1 OS=Homo sapiens GN=BABAM1 PE=1 SV=1

Match to Query 14126: 1145.625from(573.8197,2+)

Title: 53: Scan 235 (rt=14.6797, f=2, i=38) [D:\lab212\membrane\Grace\Joyce\iTRAQ\_26\_2.raw]

Data File: Submitted from 20120508-1(merge) by Mascot Daemon on JOYCE-VAIO

Monoisotopic mass of neutral peptide Mr(calc): 1145.625

Variable modifications:

Ions Score: 44.16 Expect: 0.032

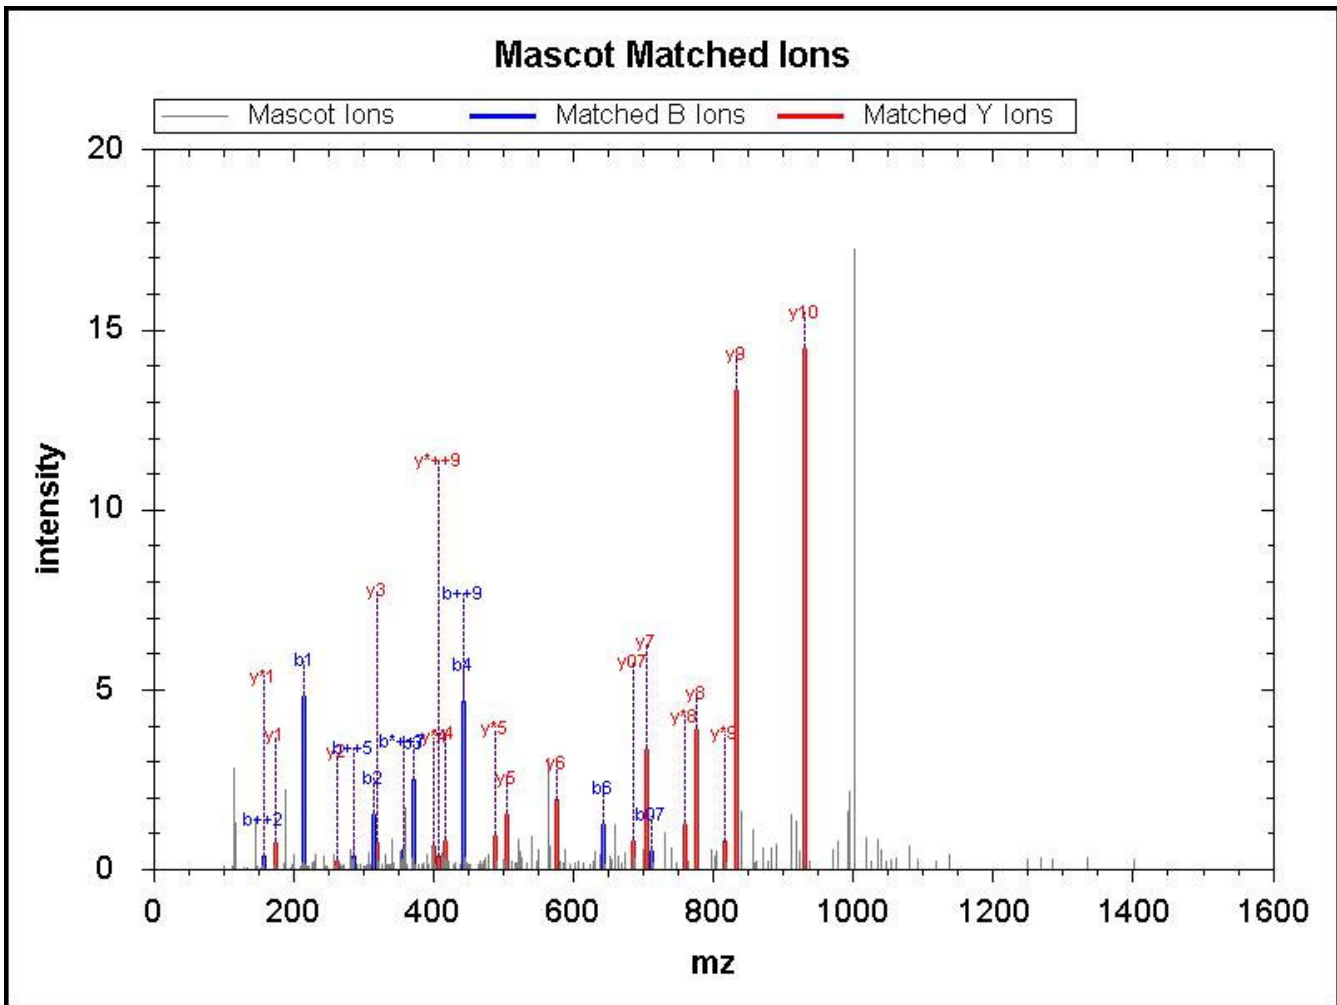

| No | b      | b++    | b*     | b*++   | b0     | b0++   | Seq | y      | y++    | y*     | y*++   | y0     | y0++   | RevNo |
|----|--------|--------|--------|--------|--------|--------|-----|--------|--------|--------|--------|--------|--------|-------|
| 1  | 216.15 | 108.58 |        |        |        |        | A   |        |        |        |        |        |        | 11    |
| 2  | 315.21 | 158.11 |        |        |        |        | V   | 931.50 | 466.25 | 914.47 | 457.74 | 913.49 | 457.25 | 10    |
| 3  | 372.24 | 186.62 |        |        |        |        | G   | 832.43 | 416.72 | 815.40 | 408.20 | 814.42 | 407.71 | 9     |
| 4  | 443.27 | 222.14 |        |        |        |        | A   | 775.41 | 388.21 | 758.38 | 379.69 | 757.40 | 379.20 | 8     |
| 5  | 571.33 | 286.17 | 554.31 | 277.66 |        |        | Q   | 704.37 | 352.69 | 687.34 | 344.17 | 686.36 | 343.68 | 7     |
| 6  | 642.37 | 321.69 | 625.34 | 313.17 |        |        | A   | 576.31 | 288.66 | 559.28 | 280.15 | 558.30 | 279.65 | 6     |
| 7  | 729.40 | 365.20 | 712.37 | 356.69 | 711.39 | 356.20 | S   | 505.27 | 253.14 | 488.25 | 244.63 | 487.26 | 244.13 | 5     |
| 8  | 828.47 | 414.74 | 811.44 | 406.23 | 810.46 | 405.73 | V   | 418.24 | 209.62 | 401.21 | 201.11 | 400.23 | 200.62 | 4     |
| 9  | 885.49 | 443.25 | 868.46 | 434.74 | 867.48 | 434.24 | G   | 319.17 | 160.09 | 302.15 | 151.58 | 301.16 | 151.08 | 3     |
| 10 | 972.52 | 486.77 | 955.50 | 478.25 | 954.51 | 477.76 | S   | 262.15 | 131.58 | 245.12 | 123.07 | 244.14 | 122.57 | 2     |
| 11 |        |        |        |        |        |        | R   | 175.12 | 88.06  | 158.09 | 79.55  |        |        | 1     |

Query 39098 Hit 1

MS/MS Fragmentation of **MLSFQGLAELAHR**

Found in [sp|O15294|OGT1\\_HUMAN](#), UDP-N-acetylglucosamine--peptide N-acetylglucosaminyltransferase 110 kDa subunit OS=Homo sapiens GN=OGT PE=1 SV=3

Match to Query 39098: 1615.863from(539.6282,3+)

Title: 827: Scan 1843 (rt=50.9264, f=3, i=281) [D:\lab212\membrane\Grace\Joyce\iTRAQ\_36\_1.raw]

Data File: Submitted from 20120508-1(merge) by Mascot Daemon on JOYCE-VAIO

Monoisotopic mass of neutral peptide Mr(calc): 1615.863

Variable modifications:

Ions Score: 44.15 Expect: 0.032

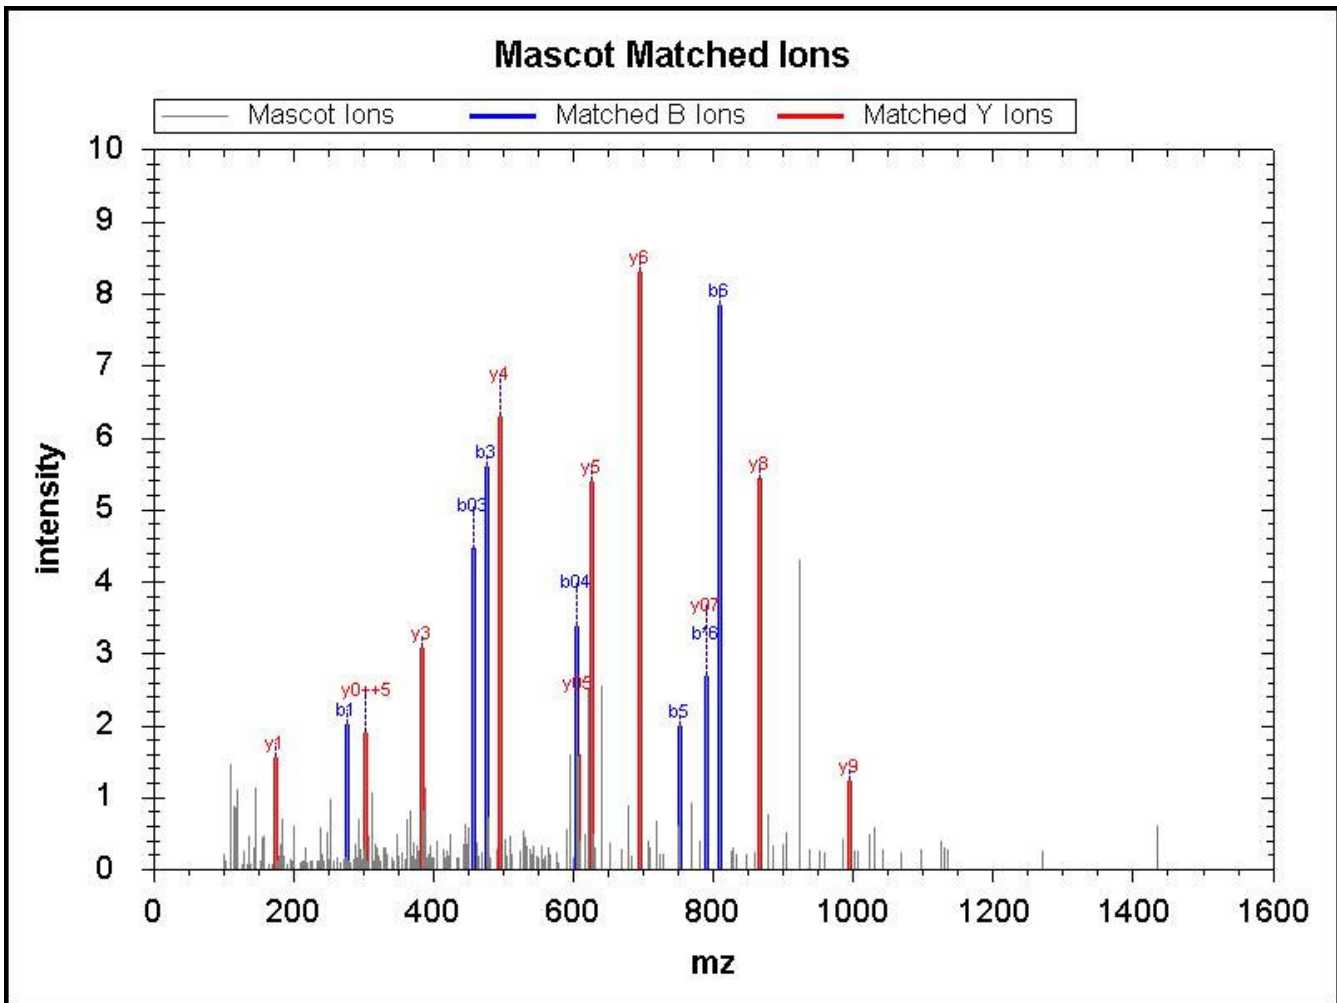

| No | b        | b++    | b*       | b*++   | b0       | b0++   | Seq | y        | y++    | y*       | y*++   | y0       | y0++   | RevNo |
|----|----------|--------|----------|--------|----------|--------|-----|----------|--------|----------|--------|----------|--------|-------|
| 1  | 276.15   | 138.58 |          |        |          |        | M   |          |        |          |        |          |        | 13    |
| 2  | 389.23   | 195.12 |          |        |          |        | L   | 1,341.73 | 671.37 | 1,324.70 | 662.85 | 1,323.72 | 662.36 | 12    |
| 3  | 476.27   | 238.64 |          |        | 458.26   | 229.63 | S   | 1,228.64 | 614.83 | 1,211.62 | 606.31 | 1,210.63 | 605.82 | 11    |
| 4  | 623.33   | 312.17 |          |        | 605.32   | 303.17 | F   | 1,141.61 | 571.31 | 1,124.58 | 562.80 | 1,123.60 | 562.30 | 10    |
| 5  | 751.39   | 376.20 | 734.37   | 367.69 | 733.38   | 367.19 | Q   | 994.54   | 497.78 | 977.52   | 489.26 | 976.53   | 488.77 | 9     |
| 6  | 808.41   | 404.71 | 791.39   | 396.20 | 790.40   | 395.71 | G   | 866.48   | 433.75 | 849.46   | 425.23 | 848.47   | 424.74 | 8     |
| 7  | 921.50   | 461.25 | 904.47   | 452.74 | 903.49   | 452.25 | L   | 809.46   | 405.24 | 792.44   | 396.72 | 791.45   | 396.23 | 7     |
| 8  | 992.54   | 496.77 | 975.51   | 488.26 | 974.53   | 487.77 | A   | 696.38   | 348.69 | 679.35   | 340.18 | 678.37   | 339.69 | 6     |
| 9  | 1,121.58 | 561.29 | 1,104.55 | 552.78 | 1,103.57 | 552.29 | E   | 625.34   | 313.17 | 608.32   | 304.66 | 607.33   | 304.17 | 5     |
| 10 | 1,234.66 | 617.83 | 1,217.64 | 609.32 | 1,216.65 | 608.83 | L   | 496.30   | 248.65 | 479.27   | 240.14 |          |        | 4     |
| 11 | 1,305.70 | 653.35 | 1,288.67 | 644.84 | 1,287.69 | 644.35 | A   | 383.21   | 192.11 | 366.19   | 183.60 |          |        | 3     |
| 12 | 1,442.76 | 721.88 | 1,425.73 | 713.37 | 1,424.75 | 712.88 | H   | 312.18   | 156.59 | 295.15   | 148.08 |          |        | 2     |
| 13 |          |        |          |        |          |        | R   | 175.12   | 88.06  | 158.09   | 79.55  |          |        | 1     |

Query 3139 Hit 1

MS/MS Fragmentation of **SGSPLEK**

Found in **sp|Q9NRA8|4ET\_HUMAN**, Eukaryotic translation initiation factor 4E transporter OS=Homo sapiens GN=EIF4ENIF1 PE=1 SV=2

Match to Query 3139: 860.5255from(431.27,2+)

Title: 107: Sum of 2 scans in range 327 (rt=16.8334, f=4, i=67) to 328 (rt=16.8588, f=4, i=68)

[D:\lab212\membrane\GraceJoyce\iTRAQ\_32\_1.raw]

Data File: Submitted from 20120508-1(merge) by Mascot Daemon on JOYCE-VAIO

Monoisotopic mass of neutral peptide Mr(calc): 860.5255

Variable modifications:

K7 :iTRAQ4plex (K)

Ions Score: 44.15 Expect: 0.031



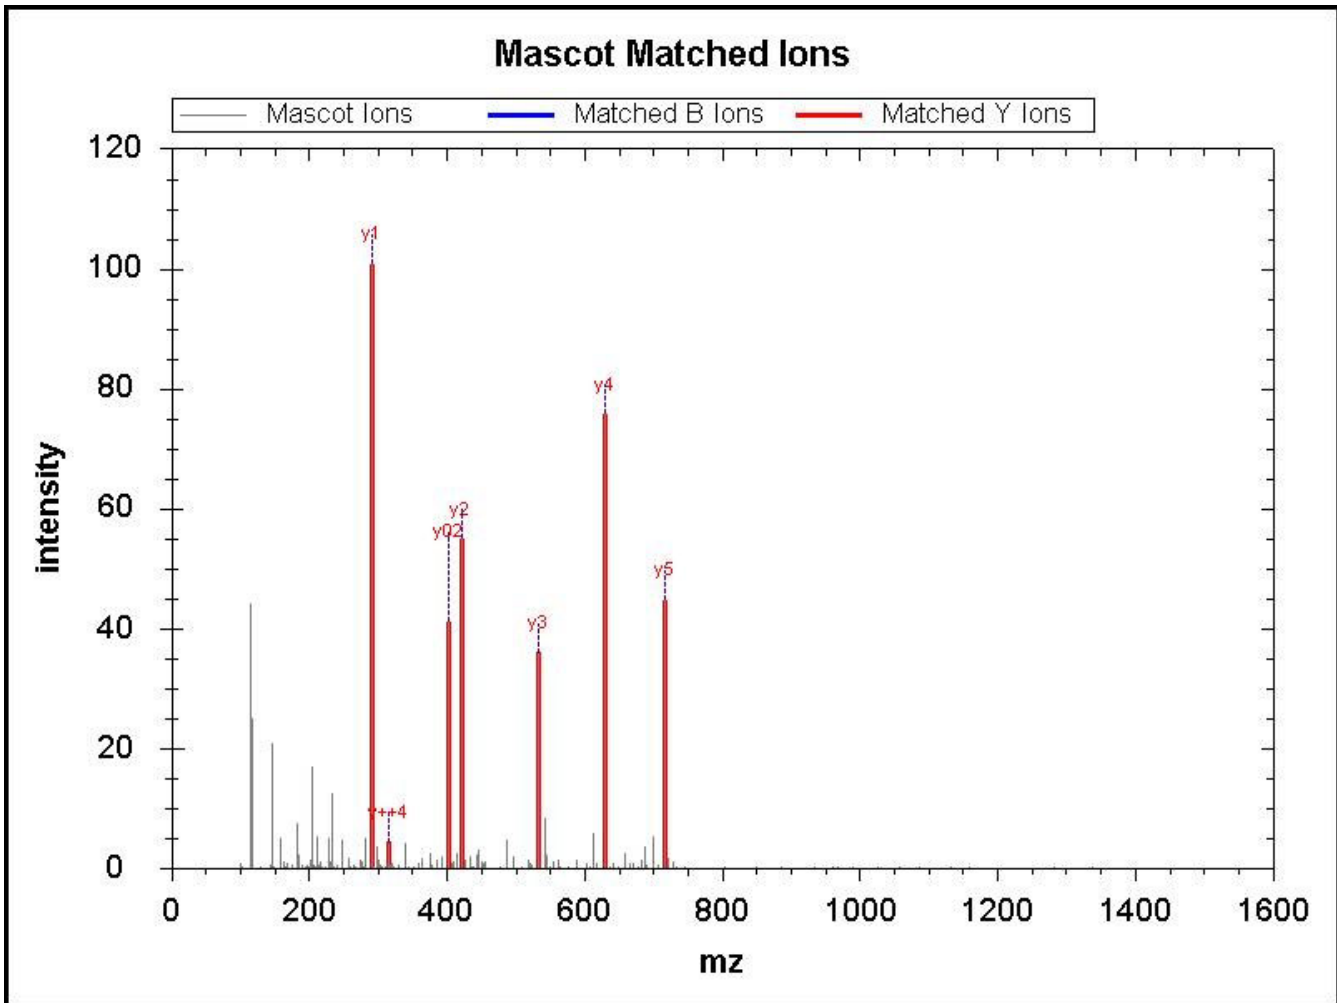

| No | b      | b++    | b0     | b0++   | Seq | y      | y++    | y*     | y*++   | y0     | y0++   | RevNo |
|----|--------|--------|--------|--------|-----|--------|--------|--------|--------|--------|--------|-------|
| 1  | 88.04  | 44.52  | 70.03  | 35.52  | S   |        |        |        |        |        |        | 7     |
| 2  | 145.06 | 73.03  | 127.05 | 64.03  | G   | 774.45 | 387.73 | 757.42 | 379.21 | 756.44 | 378.72 | 6     |
| 3  | 232.09 | 116.55 | 214.08 | 107.54 | S   | 717.43 | 359.22 | 700.40 | 350.70 | 699.42 | 350.21 | 5     |
| 4  | 329.15 | 165.08 | 311.14 | 156.07 | P   | 630.39 | 315.70 | 613.37 | 307.19 | 612.38 | 306.70 | 4     |
| 5  | 442.23 | 221.62 | 424.22 | 212.61 | L   | 533.34 | 267.17 | 516.31 | 258.66 | 515.33 | 258.17 | 3     |
| 6  | 571.27 | 286.14 | 553.26 | 277.13 | E   | 420.26 | 210.63 | 403.23 | 202.12 | 402.25 | 201.63 | 2     |
| 7  |        |        |        |        | K   | 291.21 | 146.11 | 274.19 | 137.60 |        |        | 1     |

Query 60971 Hit 1

MS/MS Fragmentation of **GFDQTINLILDESHER**

Found in **sp|O95777|NAA38\_HUMAN**, N-alpha-acetyltransferase 38

Match to Query 60971: 2030.021 from (677.681,3+)

Title: 866: Sum of 2 scans in range 1936 (rt=53.0221, f=4, i=581) to 1937 (rt=53.0475, f=4, i=582)

[D:\lab212\membrane\Grace\Joyce\iTRAQ\_35\_2.raw]

Data File: Submitted from 20120508-1 (merge) by Mascot Daemon on JOYCE-VAIO

Monoisotopic mass of neutral peptide Mr(calc): 2030.021

Variable modifications:

Ions Score: 44.12 Expect: 0.035

### Mascot Matched Ions

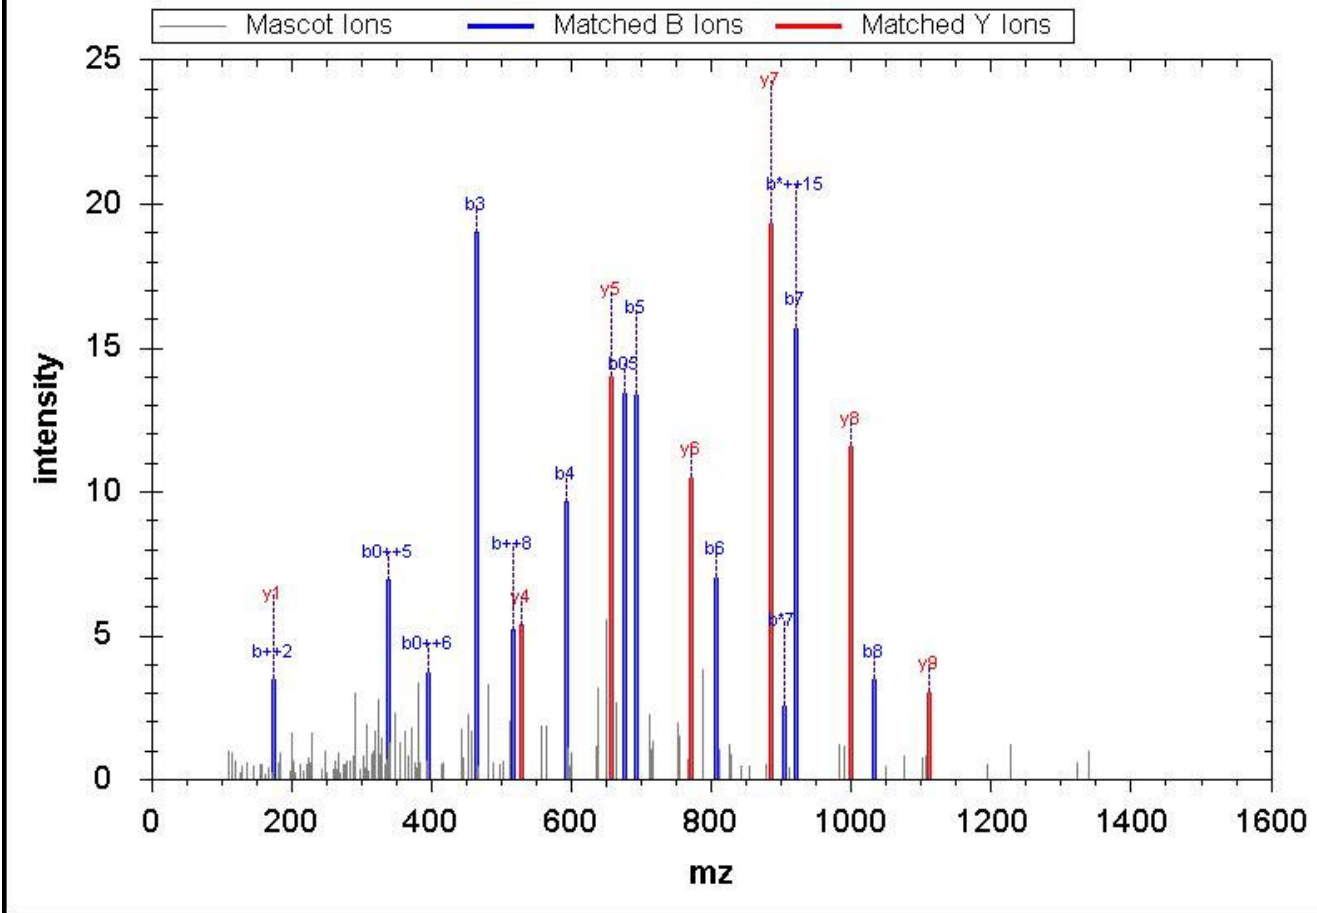

| No | b        | b++    | b*       | b*++   | b0       | b0++   | Seq | y        | y++    | y*       | y*++   | y0       | y0++   | RevNo |
|----|----------|--------|----------|--------|----------|--------|-----|----------|--------|----------|--------|----------|--------|-------|
| 1  | 202.13   | 101.57 |          |        |          |        | G   |          |        |          |        |          |        | 16    |
| 2  | 349.20   | 175.10 |          |        |          |        | F   | 1,829.90 | 915.46 | 1,812.88 | 906.94 | 1,811.89 | 906.45 | 15    |
| 3  | 464.23   | 232.62 |          |        | 446.22   | 223.61 | D   | 1,682.83 | 841.92 | 1,665.81 | 833.41 | 1,664.82 | 832.92 | 14    |
| 4  | 592.28   | 296.65 | 575.26   | 288.13 | 574.27   | 287.64 | Q   | 1,567.81 | 784.41 | 1,550.78 | 775.89 | 1,549.80 | 775.40 | 13    |
| 5  | 693.33   | 347.17 | 676.31   | 338.66 | 675.32   | 338.16 | T   | 1,439.75 | 720.38 | 1,422.72 | 711.86 | 1,421.74 | 711.37 | 12    |
| 6  | 806.42   | 403.71 | 789.39   | 395.20 | 788.41   | 394.71 | I   | 1,338.70 | 669.85 | 1,321.67 | 661.34 | 1,320.69 | 660.85 | 11    |
| 7  | 920.46   | 460.73 | 903.43   | 452.22 | 902.45   | 451.73 | N   | 1,225.62 | 613.31 | 1,208.59 | 604.80 | 1,207.61 | 604.31 | 10    |
| 8  | 1,033.54 | 517.28 | 1,016.52 | 508.76 | 1,015.53 | 508.27 | L   | 1,111.57 | 556.29 | 1,094.55 | 547.78 | 1,093.56 | 547.29 | 9     |
| 9  | 1,146.63 | 573.82 | 1,129.60 | 565.30 | 1,128.62 | 564.81 | I   | 998.49   | 499.75 | 981.46   | 491.24 | 980.48   | 490.74 | 8     |
| 10 | 1,259.71 | 630.36 | 1,242.69 | 621.85 | 1,241.70 | 621.35 | L   | 885.41   | 443.21 | 868.38   | 434.69 | 867.40   | 434.20 | 7     |
| 11 | 1,374.74 | 687.87 | 1,357.71 | 679.36 | 1,356.73 | 678.87 | D   | 772.32   | 386.66 | 755.30   | 378.15 | 754.31   | 377.66 | 6     |
| 12 | 1,503.78 | 752.39 | 1,486.75 | 743.88 | 1,485.77 | 743.39 | E   | 657.30   | 329.15 | 640.27   | 320.64 | 639.28   | 320.15 | 5     |
| 13 | 1,590.81 | 795.91 | 1,573.79 | 787.40 | 1,572.80 | 786.90 | S   | 528.25   | 264.63 | 511.23   | 256.12 | 510.24   | 255.62 | 4     |
| 14 | 1,727.87 | 864.44 | 1,710.85 | 855.93 | 1,709.86 | 855.43 | H   | 441.22   | 221.11 | 424.19   | 212.60 | 423.21   | 212.11 | 3     |
| 15 | 1,856.91 | 928.96 | 1,839.89 | 920.45 | 1,838.90 | 919.96 | E   | 304.16   | 152.58 | 287.13   | 144.07 | 286.15   | 143.58 | 2     |
| 16 |          |        |          |        |          |        | R   | 175.12   | 88.06  | 158.09   | 79.55  |          |        | 1     |

Query 60986 Hit 1

MS/MS Fragmentation of **VSIAELAQASNSLIAWGR**

Found in **sp|Q96HY6|DDRKG\_HUMAN**, DDRKG domain-containing protein 1 OS=Homo sapiens GN=DDRKG1 PE=1 SV=2

Match to Query 60986: 2030.097 from (677.7061, 3+)

Title: 1030: Sum of 2 scans in range 2466 (rt=63.9498, f=4, i=677) to 2467 (rt=63.9752, f=4, i=678)

[D:\lab212\membrane\GraceJoyce\iTRAQ\_23\_2.raw]

Data File: Submitted from 20120508-1(merge) by Mascot Daemon on JOYCE-VAIO

Monoisotopic mass of neutral peptide Mr(calc): 2030.097

Variable modifications:  
 Q8 :Deamidated (NQ)  
 Ions Score: 44.12 Expect: 0.031

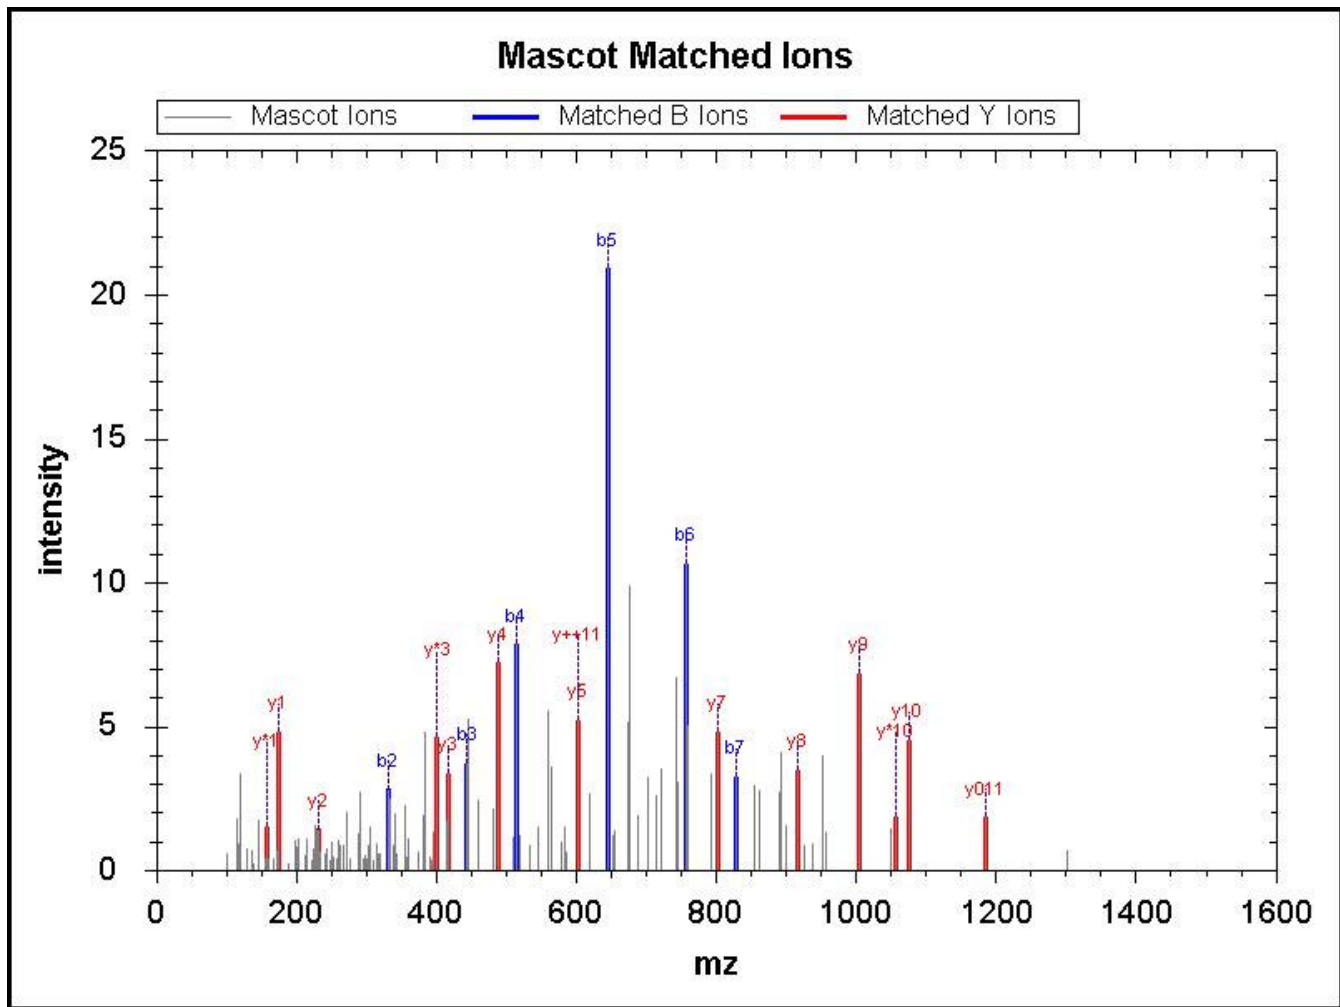

| No | b        | b++    | b*       | b*++   | b0       | b0++   | Seq | y        | y++    | y*       | y*++   | y0       | y0++   | RevNo |
|----|----------|--------|----------|--------|----------|--------|-----|----------|--------|----------|--------|----------|--------|-------|
| 1  | 244.18   | 122.59 |          |        |          |        | V   |          |        |          |        |          |        | 18    |
| 2  | 331.21   | 166.11 |          |        | 313.20   | 157.10 | S   | 1,787.93 | 894.47 | 1,770.90 | 885.95 | 1,769.92 | 885.46 | 17    |
| 3  | 444.29   | 222.65 |          |        | 426.28   | 213.65 | I   | 1,700.90 | 850.95 | 1,683.87 | 842.44 | 1,682.89 | 841.95 | 16    |
| 4  | 515.33   | 258.17 |          |        | 497.32   | 249.16 | A   | 1,587.81 | 794.41 | 1,570.79 | 785.90 | 1,569.80 | 785.40 | 15    |
| 5  | 644.37   | 322.69 |          |        | 626.36   | 313.69 | E   | 1,516.78 | 758.89 | 1,499.75 | 750.38 | 1,498.76 | 749.89 | 14    |
| 6  | 757.46   | 379.23 |          |        | 739.45   | 370.23 | L   | 1,387.73 | 694.37 | 1,370.71 | 685.86 | 1,369.72 | 685.36 | 13    |
| 7  | 828.49   | 414.75 |          |        | 810.48   | 405.75 | A   | 1,274.65 | 637.83 | 1,257.62 | 629.31 | 1,256.64 | 628.82 | 12    |
| 8  | 957.54   | 479.27 | 940.51   | 470.76 | 939.53   | 470.27 | Q   | 1,203.61 | 602.31 | 1,186.59 | 593.80 | 1,185.60 | 593.30 | 11    |
| 9  | 1,028.57 | 514.79 | 1,011.55 | 506.28 | 1,010.56 | 505.79 | A   | 1,074.57 | 537.79 | 1,057.54 | 529.27 | 1,056.56 | 528.78 | 10    |
| 10 | 1,115.61 | 558.31 | 1,098.58 | 549.79 | 1,097.60 | 549.30 | S   | 1,003.53 | 502.27 | 986.51   | 493.76 | 985.52   | 493.26 | 9     |
| 11 | 1,229.65 | 615.33 | 1,212.62 | 606.82 | 1,211.64 | 606.32 | N   | 916.50   | 458.75 | 899.47   | 450.24 | 898.49   | 449.75 | 8     |
| 12 | 1,316.68 | 658.84 | 1,299.65 | 650.33 | 1,298.67 | 649.84 | S   | 802.46   | 401.73 | 785.43   | 393.22 | 784.45   | 392.73 | 7     |
| 13 | 1,429.77 | 715.39 | 1,412.74 | 706.87 | 1,411.75 | 706.38 | L   | 715.42   | 358.22 | 698.40   | 349.70 |          |        | 6     |
| 14 | 1,542.85 | 771.93 | 1,525.82 | 763.42 | 1,524.84 | 762.92 | I   | 602.34   | 301.67 | 585.31   | 293.16 |          |        | 5     |
| 15 | 1,613.89 | 807.45 | 1,596.86 | 798.93 | 1,595.88 | 798.44 | A   | 489.26   | 245.13 | 472.23   | 236.62 |          |        | 4     |
| 16 | 1,799.97 | 900.49 | 1,782.94 | 891.97 | 1,781.96 | 891.48 | W   | 418.22   | 209.61 | 401.19   | 201.10 |          |        | 3     |
| 17 | 1,856.99 | 929.00 | 1,839.96 | 920.48 | 1,838.98 | 919.99 | G   | 232.14   | 116.57 | 215.11   | 108.06 |          |        | 2     |
| 18 |          |        |          |        |          |        | R   | 175.12   | 88.06  | 158.09   | 79.55  |          |        | 1     |

MS/MS Fragmentation of **SSSQPSPDPK**

Found in **sp|Q9H320|VCX1\_HUMAN**, Variable charge X-linked protein 1 OS=Homo sapiens GN=VCX PE=2 SV=1

Match to Query 27675: 1403.717from(702.8657,2+)

Title: 4: Sum of 2 scans in range 159 (rt=12.7685, f=2, i=7) to 160 (rt=12.7939, f=2, i=8)

[D:\lab212\membrane\GraceJoyce\iTRAQ\_30\_2.raw]

Data File:Submitted from 20120508-1(merge) by Mascot Daemon on JOYCE-VAIO

Monoisotopic mass of neutral peptide Mr(calc): 1403.717

Variable modifications:

K11 iTRAQ4plex (K)

Ions Score: 44.1 Expect: 0.032

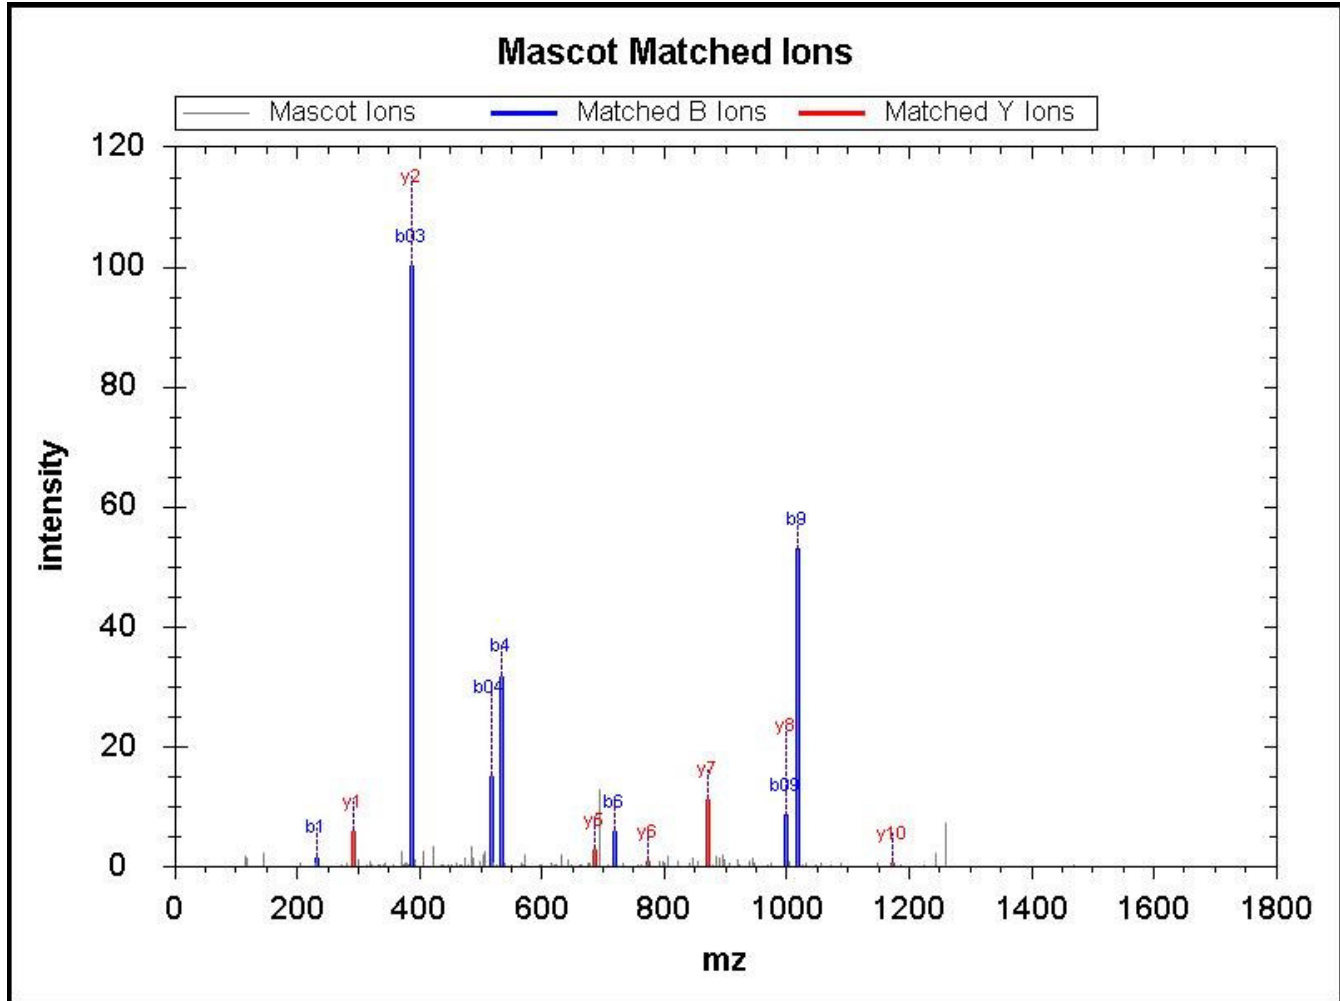

| No | b        | b++    | b*       | b*++   | b0       | b0++   | Seq | y        | y++    | y*       | y*++   | y0       | y0++   | RevNo |
|----|----------|--------|----------|--------|----------|--------|-----|----------|--------|----------|--------|----------|--------|-------|
| 1  | 232.14   | 116.57 |          |        | 214.13   | 107.57 | S   |          |        |          |        |          |        | 11    |
| 2  | 319.17   | 160.09 |          |        | 301.16   | 151.09 | S   | 1,173.59 | 587.30 | 1,156.56 | 578.78 | 1,155.58 | 578.29 | 10    |
| 3  | 406.21   | 203.61 |          |        | 388.19   | 194.60 | S   | 1,086.55 | 543.78 | 1,069.53 | 535.27 | 1,068.54 | 534.78 | 9     |
| 4  | 534.26   | 267.64 | 517.24   | 259.12 | 516.25   | 258.63 | Q   | 999.52   | 500.27 | 982.50   | 491.75 | 981.51   | 491.26 | 8     |
| 5  | 631.32   | 316.16 | 614.29   | 307.65 | 613.31   | 307.16 | P   | 871.46   | 436.24 | 854.44   | 427.72 | 853.45   | 427.23 | 7     |
| 6  | 718.35   | 359.68 | 701.32   | 351.16 | 700.34   | 350.67 | S   | 774.41   | 387.71 | 757.38   | 379.20 | 756.40   | 378.70 | 6     |
| 7  | 815.40   | 408.20 | 798.38   | 399.69 | 797.39   | 399.20 | P   | 687.38   | 344.19 | 670.35   | 335.68 | 669.37   | 335.19 | 5     |
| 8  | 902.43   | 451.72 | 885.41   | 443.21 | 884.42   | 442.72 | S   | 590.33   | 295.67 | 573.30   | 287.15 | 572.32   | 286.66 | 4     |
| 9  | 1,017.46 | 509.23 | 1,000.43 | 500.72 | 999.45   | 500.23 | D   | 503.29   | 252.15 | 486.27   | 243.64 | 485.28   | 243.15 | 3     |
| 10 | 1,114.51 | 557.76 | 1,097.49 | 549.25 | 1,096.50 | 548.76 | P   | 388.27   | 194.64 | 371.24   | 186.12 |          |        | 2     |
| 11 |          |        |          |        |          |        | K   | 291.21   | 146.11 | 274.19   | 137.60 |          |        | 1     |

Query 67078 Hit 1

MS/MS Fragmentation of **SLLEPLMQGYWEWLVR**

Found in **sp|Q9Y6K0|CEPT1\_HUMAN**, Choline/ethanolaminephosphotransferase 1 OS=Homo sapiens GN=CEPT1 PE=1 SV=1

Match to Query 67078: 2163.126from(722.0492,3+)

Title: 1341: Sum of 2 scans in range 3057 (rt=77.9569, f=2, i=499) to 3058 (rt=77.9823, f=2, i=500)  
 [D:\lab212\membrane\GraceJoyce\iTRAQ\_22\_1.raw]  
 Data File: Submitted from 20120508-1(merge) by Mascot Daemon on JOYCE-VAIO  
 Monoisotopic mass of neutral peptide Mr(calc): 2163.126  
 Variable modifications:  
 Ions Score: 44.08 Expect: 0.036

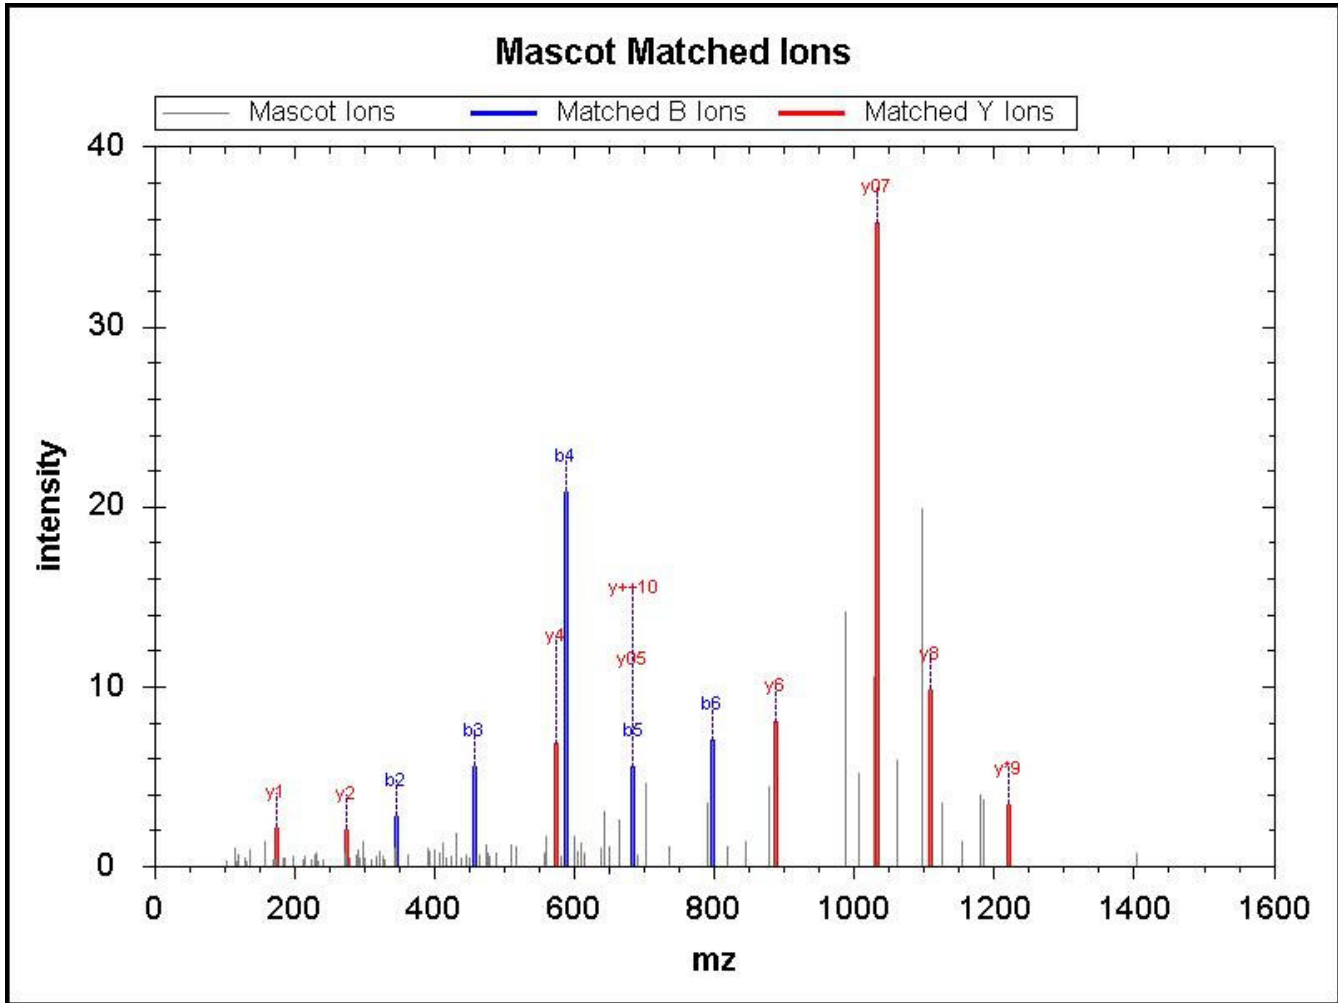

| No | b        | b++    | b*       | b*++   | b0       | b0++   | Seq | y        | y++    | y*       | y*++   | y0       | y0++   | RevNo |
|----|----------|--------|----------|--------|----------|--------|-----|----------|--------|----------|--------|----------|--------|-------|
| 1  | 232.14   | 116.57 |          |        | 214.13   | 107.57 | S   |          |        |          |        |          |        | 16    |
| 2  | 345.23   | 173.12 |          |        | 327.21   | 164.11 | L   | 1,933.00 | 967.01 | 1,915.98 | 958.49 | 1,914.99 | 958.00 | 15    |
| 3  | 458.31   | 229.66 |          |        | 440.30   | 220.65 | L   | 1,819.92 | 910.46 | 1,802.89 | 901.95 | 1,801.91 | 901.46 | 14    |
| 4  | 587.35   | 294.18 |          |        | 569.34   | 285.17 | E   | 1,706.84 | 853.92 | 1,689.81 | 845.41 | 1,688.83 | 844.92 | 13    |
| 5  | 684.40   | 342.71 |          |        | 666.39   | 333.70 | P   | 1,577.79 | 789.40 | 1,560.77 | 780.89 | 1,559.78 | 780.40 | 12    |
| 6  | 797.49   | 399.25 |          |        | 779.48   | 390.24 | L   | 1,480.74 | 740.87 | 1,463.71 | 732.36 | 1,462.73 | 731.87 | 11    |
| 7  | 928.53   | 464.77 |          |        | 910.52   | 455.76 | M   | 1,367.66 | 684.33 | 1,350.63 | 675.82 | 1,349.65 | 675.33 | 10    |
| 8  | 1,056.59 | 528.80 | 1,039.56 | 520.28 | 1,038.58 | 519.79 | Q   | 1,236.62 | 618.81 | 1,219.59 | 610.30 | 1,218.61 | 609.81 | 9     |
| 9  | 1,113.61 | 557.31 | 1,096.58 | 548.80 | 1,095.60 | 548.30 | G   | 1,108.56 | 554.78 | 1,091.53 | 546.27 | 1,090.55 | 545.78 | 8     |
| 10 | 1,276.67 | 638.84 | 1,259.65 | 630.33 | 1,258.66 | 629.83 | Y   | 1,051.54 | 526.27 | 1,034.51 | 517.76 | 1,033.53 | 517.27 | 7     |
| 11 | 1,462.75 | 731.88 | 1,445.73 | 723.37 | 1,444.74 | 722.87 | W   | 888.47   | 444.74 | 871.45   | 436.23 | 870.46   | 435.73 | 6     |
| 12 | 1,591.79 | 796.40 | 1,574.77 | 787.89 | 1,573.78 | 787.40 | E   | 702.39   | 351.70 | 685.37   | 343.19 | 684.38   | 342.70 | 5     |
| 13 | 1,777.87 | 889.44 | 1,760.85 | 880.93 | 1,759.86 | 880.44 | W   | 573.35   | 287.18 | 556.32   | 278.67 |          |        | 4     |
| 14 | 1,890.96 | 945.98 | 1,873.93 | 937.47 | 1,872.95 | 936.98 | L   | 387.27   | 194.14 | 370.24   | 185.63 |          |        | 3     |
| 15 | 1,990.03 | 995.52 | 1,973.00 | 987.00 | 1,972.02 | 986.51 | V   | 274.19   | 137.60 | 257.16   | 129.08 |          |        | 2     |
| 16 |          |        |          |        |          |        | R   | 175.12   | 88.06  | 158.09   | 79.55  |          |        | 1     |

MS/MS Fragmentation of **KIDDLIGDLVQR**

Found in **sp|Q9Y6X5|ENPP4\_HUMAN**, Ectonucleotide pyrophosphatase/phosphodiesterase family member 4 OS=Homo sapiens

GN=ENPP4 PE=1 SV=3

Match to Query 42068: 1671.977from(558.3328,3+)

Title: 841: Sum of 2 scans in range 1860 (rt=51.5027, f=4, i=564) to 1861 (rt=51.5281, f=4, i=565)

[D:\lab212\membrane\GraceJoyce\iTRAQ\_44\_2.raw]

Data File:Submitted from 20120508-1(merge) by Mascot Daemon on JOYCE-VAIO

Monoisotopic mass of neutral peptide Mr(calc): 1671.977

Variable modifications:

K1 :iTRAQ4plex (K)

Ions Score: 44.06 Expect: 0.021

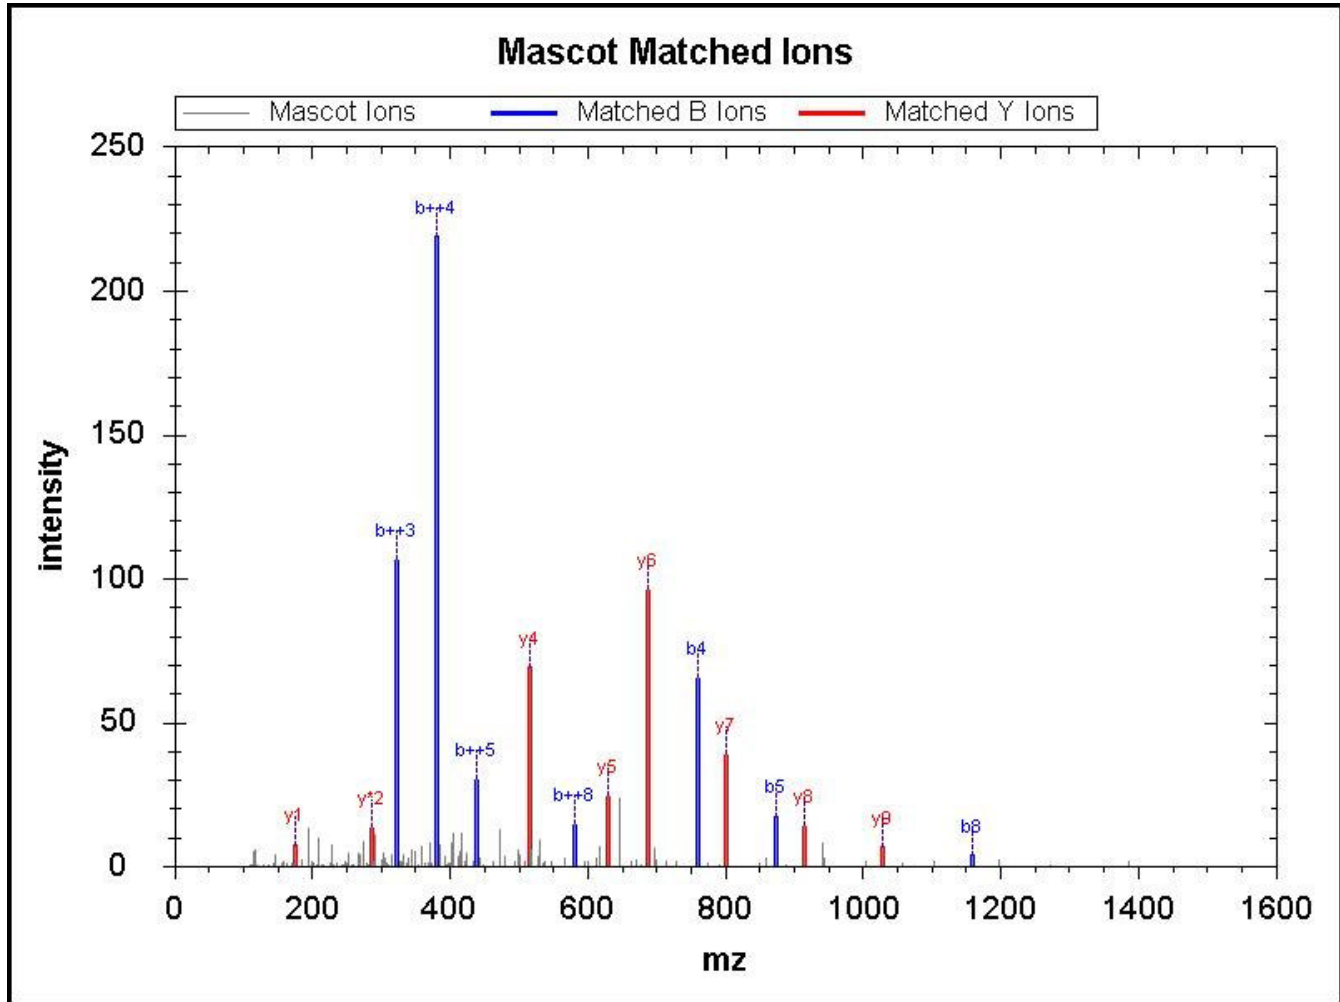

| No | b        | b++    | b*       | b*++   | b0       | b0++   | Seq | y        | y++    | y*       | y*++   | y0       | y0++   | RevNo |
|----|----------|--------|----------|--------|----------|--------|-----|----------|--------|----------|--------|----------|--------|-------|
| 1  | 417.31   | 209.16 | 400.28   | 200.64 |          |        | K   |          |        |          |        |          |        | 12    |
| 2  | 530.39   | 265.70 | 513.36   | 257.19 |          |        | I   | 1,256.68 | 628.85 | 1,239.66 | 620.33 | 1,238.67 | 619.84 | 11    |
| 3  | 645.42   | 323.21 | 628.39   | 314.70 | 627.41   | 314.21 | D   | 1,143.60 | 572.30 | 1,126.57 | 563.79 | 1,125.59 | 563.30 | 10    |
| 4  | 760.44   | 380.73 | 743.42   | 372.21 | 742.43   | 371.72 | D   | 1,028.57 | 514.79 | 1,011.55 | 506.28 | 1,010.56 | 505.79 | 9     |
| 5  | 873.53   | 437.27 | 856.50   | 428.75 | 855.52   | 428.26 | L   | 913.55   | 457.28 | 896.52   | 448.76 | 895.54   | 448.27 | 8     |
| 6  | 986.61   | 493.81 | 969.59   | 485.30 | 968.60   | 484.80 | I   | 800.46   | 400.73 | 783.44   | 392.22 | 782.45   | 391.73 | 7     |
| 7  | 1,043.63 | 522.32 | 1,026.61 | 513.81 | 1,025.62 | 513.32 | G   | 687.38   | 344.19 | 670.35   | 335.68 | 669.37   | 335.19 | 6     |
| 8  | 1,158.66 | 579.83 | 1,141.63 | 571.32 | 1,140.65 | 570.83 | D   | 630.36   | 315.68 | 613.33   | 307.17 | 612.35   | 306.68 | 5     |
| 9  | 1,271.74 | 636.38 | 1,254.72 | 627.86 | 1,253.73 | 627.37 | L   | 515.33   | 258.17 | 498.30   | 249.66 |          |        | 4     |
| 10 | 1,370.81 | 685.91 | 1,353.79 | 677.40 | 1,352.80 | 676.90 | V   | 402.25   | 201.63 | 385.22   | 193.11 |          |        | 3     |
| 11 | 1,498.87 | 749.94 | 1,481.85 | 741.43 | 1,480.86 | 740.93 | Q   | 303.18   | 152.09 | 286.15   | 143.58 |          |        | 2     |
| 12 |          |        |          |        |          |        | R   | 175.12   | 88.06  | 158.09   | 79.55  |          |        | 1     |

Query 58645 Hit 1

MS/MS Fragmentation of **NEVSFVIHNLPIIAK**

Found in [sp|Q99611|SPS2\\_HUMAN](#), Selenide

Match to Query 58645: 1981.157from(661.3929,3+)

Title: 872: Sum of 2 scans in range 1934 (rt=52.9877, f=4, i=581) to 1935 (rt=53.0131, f=4, i=582)

[D:\lab212\membrane\GraceJoyce\iTRAQ\_36\_2.raw]

Data File:Submitted from 20120508-1(merge) by Mascot Daemon on JOYCE-VAIO

Monoisotopic mass of neutral peptide Mr(calc): 1981.157

Variable modifications:

K15 iTRAQ4plex (K)

Ions Score: 43.99 Expect: 0.016

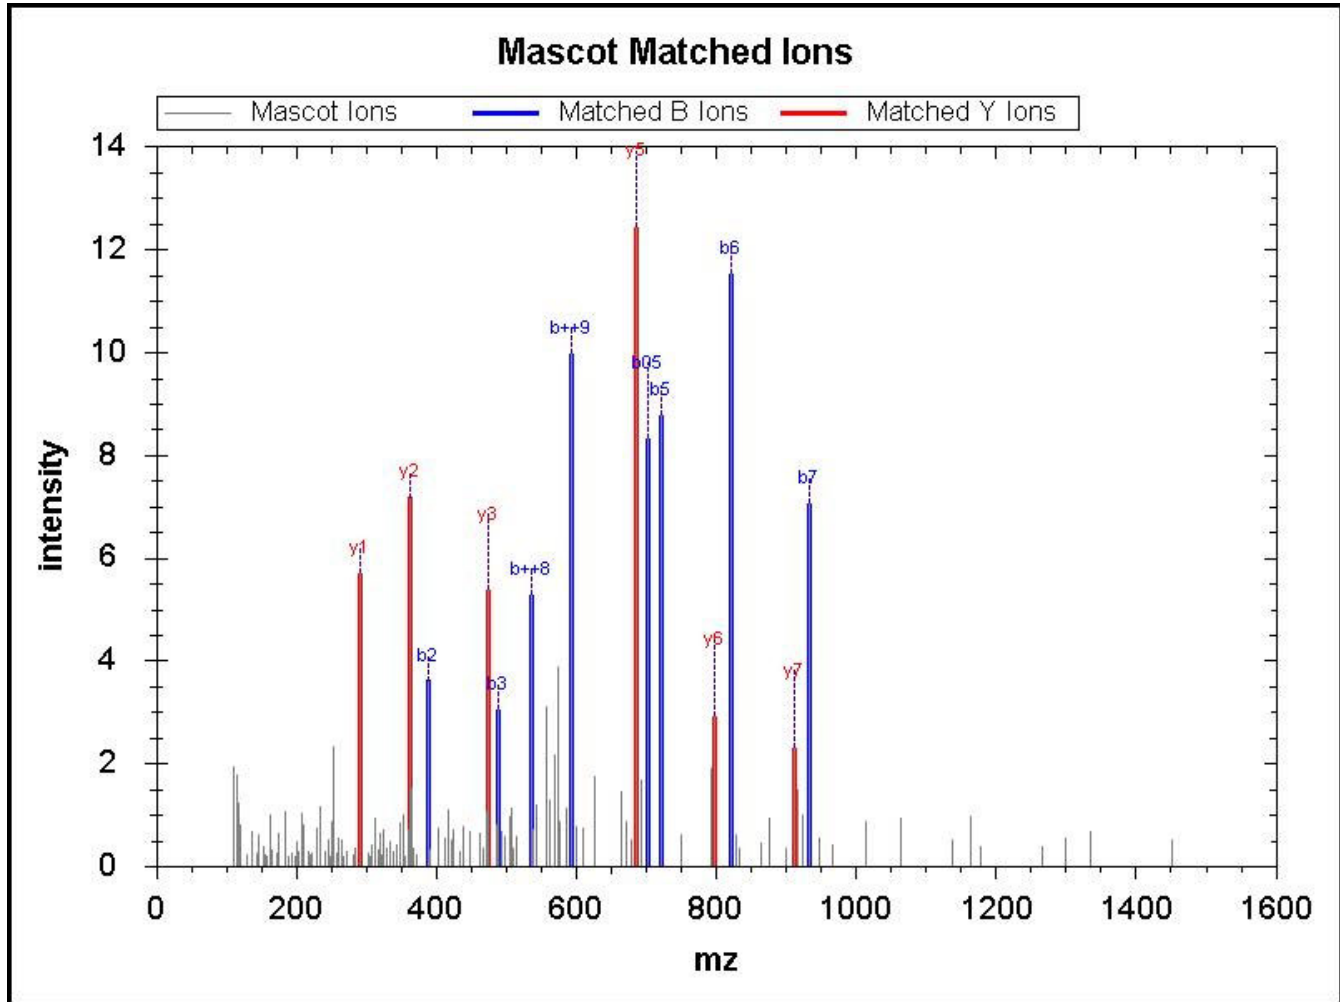

| No | b        | b++    | b*       | b*++   | b0       | b0++   | Seq | y        | y++    | y*       | y*++   | y0       | y0++   | RevNo |
|----|----------|--------|----------|--------|----------|--------|-----|----------|--------|----------|--------|----------|--------|-------|
| 1  | 259.15   | 130.08 | 242.13   | 121.57 |          |        | N   |          |        |          |        |          |        | 15    |
| 2  | 388.19   | 194.60 | 371.17   | 186.09 | 370.18   | 185.60 | E   | 1,724.02 | 862.51 | 1,707.00 | 854.00 | 1,706.01 | 853.51 | 14    |
| 3  | 487.26   | 244.14 | 470.24   | 235.62 | 469.25   | 235.13 | V   | 1,594.98 | 797.99 | 1,577.95 | 789.48 | 1,576.97 | 788.99 | 13    |
| 4  | 574.30   | 287.65 | 557.27   | 279.14 | 556.28   | 278.65 | S   | 1,495.91 | 748.46 | 1,478.89 | 739.95 | 1,477.90 | 739.45 | 12    |
| 5  | 721.36   | 361.19 | 704.34   | 352.67 | 703.35   | 352.18 | F   | 1,408.88 | 704.94 | 1,391.85 | 696.43 |          |        | 11    |
| 6  | 820.43   | 410.72 | 803.41   | 402.21 | 802.42   | 401.71 | V   | 1,261.81 | 631.41 | 1,244.78 | 622.90 |          |        | 10    |
| 7  | 933.52   | 467.26 | 916.49   | 458.75 | 915.51   | 458.26 | I   | 1,162.74 | 581.88 | 1,145.72 | 573.36 |          |        | 9     |
| 8  | 1,070.58 | 535.79 | 1,053.55 | 527.28 | 1,052.56 | 526.79 | H   | 1,049.66 | 525.33 | 1,032.63 | 516.82 |          |        | 8     |
| 9  | 1,184.62 | 592.81 | 1,167.59 | 584.30 | 1,166.61 | 583.81 | N   | 912.60   | 456.80 | 895.57   | 448.29 |          |        | 7     |
| 10 | 1,297.70 | 649.35 | 1,280.68 | 640.84 | 1,279.69 | 640.35 | L   | 798.56   | 399.78 | 781.53   | 391.27 |          |        | 6     |
| 11 | 1,394.76 | 697.88 | 1,377.73 | 689.37 | 1,376.74 | 688.88 | P   | 685.47   | 343.24 | 668.45   | 334.73 |          |        | 5     |
| 12 | 1,507.84 | 754.42 | 1,490.81 | 745.91 | 1,489.83 | 745.42 | I   | 588.42   | 294.71 | 571.39   | 286.20 |          |        | 4     |
| 13 | 1,620.92 | 810.97 | 1,603.90 | 802.45 | 1,602.91 | 801.96 | I   | 475.34   | 238.17 | 458.31   | 229.66 |          |        | 3     |
| 14 | 1,691.96 | 846.48 | 1,674.93 | 837.97 | 1,673.95 | 837.48 | A   | 362.25   | 181.63 | 345.23   | 173.12 |          |        | 2     |
| 15 |          |        |          |        |          |        | K   | 291.21   | 146.11 | 274.19   | 137.60 |          |        | 1     |

Query 22667 Hit 1

MS/MS Fragmentation of **WFLDALEK**

Found in **sp|Q13042|CDC16\_HUMAN**, Cell division cycle protein 16 homolog OS=Homo sapiens GN=CDC16 PE=1 SV=2

Match to Query 22667: 1308.736from(655.3754,2+)

Title: 844: Scan 1960 (rt=53.1007, f=3, i=283) [D:\lab212\membrane\Grace\Joyce\iTRAQ\_29\_1.raw]

Data File:Submitted from 20120508-1(merge) by Mascot Daemon on JOYCE-VAIO

Monoisotopic mass of neutral peptide Mr(calc): 1308.736

Variable modifications:

K8 iTRAQ4plex (K)

Ions Score: 43.98 Expect: 0.029

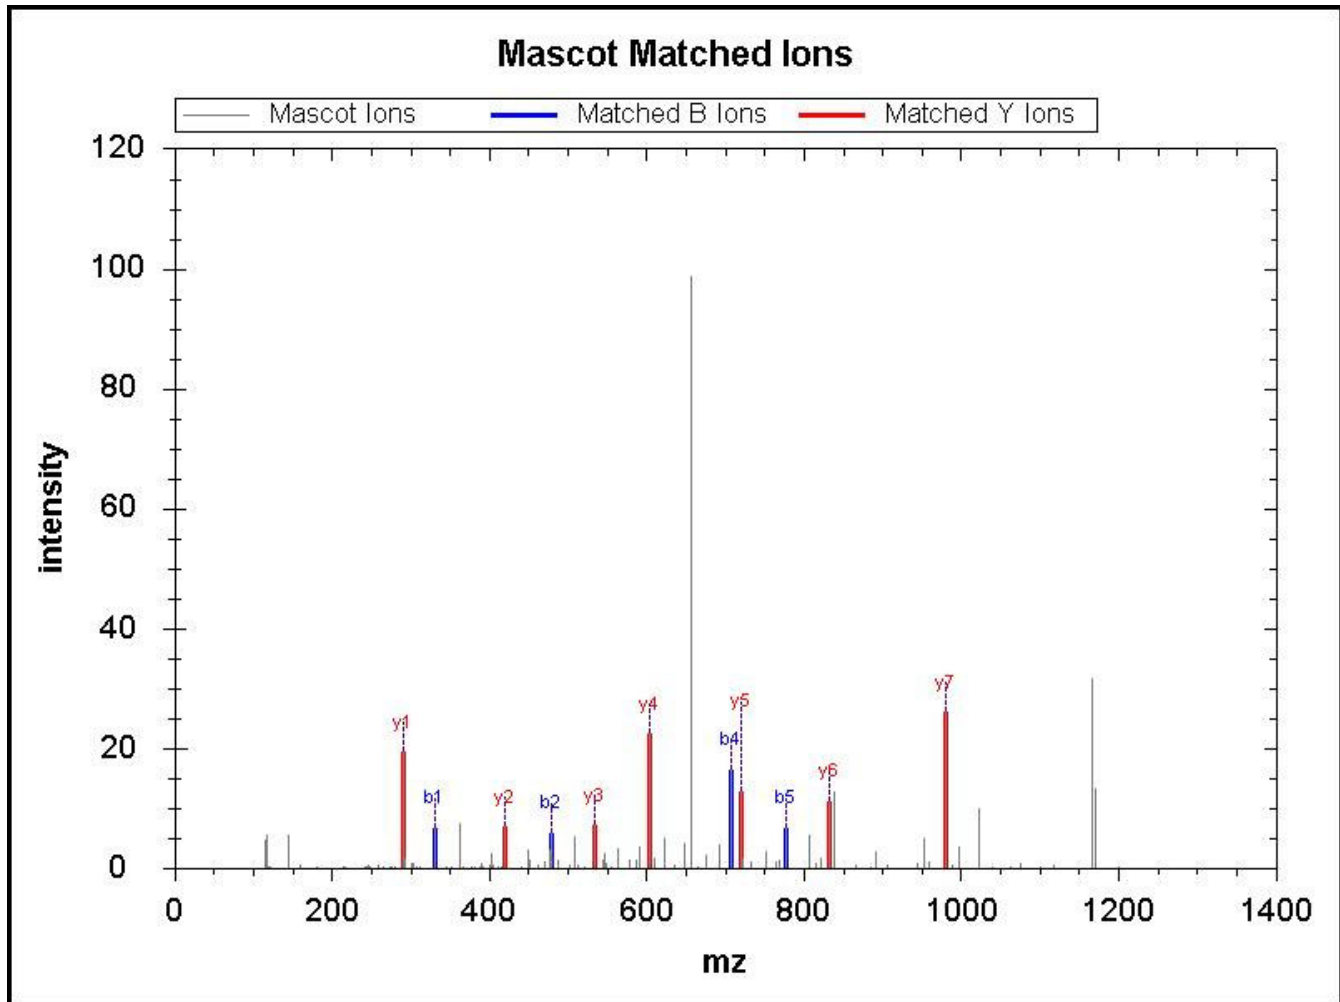

| No | b        | b++    | b0       | b0++   | Seq | y      | y++    | y*     | y*++   | y0     | y0++   | RevNo |
|----|----------|--------|----------|--------|-----|--------|--------|--------|--------|--------|--------|-------|
| 1  | 331.19   | 166.10 |          |        | W   |        |        |        |        |        |        | 8     |
| 2  | 478.26   | 239.63 |          |        | F   | 979.56 | 490.28 | 962.53 | 481.77 | 961.55 | 481.28 | 7     |
| 3  | 591.34   | 296.17 |          |        | L   | 832.49 | 416.75 | 815.46 | 408.24 | 814.48 | 407.74 | 6     |
| 4  | 706.37   | 353.69 | 688.36   | 344.68 | D   | 719.41 | 360.21 | 702.38 | 351.69 | 701.39 | 351.20 | 5     |
| 5  | 777.41   | 389.21 | 759.39   | 380.20 | A   | 604.38 | 302.69 | 587.35 | 294.18 | 586.37 | 293.69 | 4     |
| 6  | 890.49   | 445.75 | 872.48   | 436.74 | L   | 533.34 | 267.17 | 516.31 | 258.66 | 515.33 | 258.17 | 3     |
| 7  | 1,019.53 | 510.27 | 1,001.52 | 501.26 | E   | 420.26 | 210.63 | 403.23 | 202.12 | 402.25 | 201.63 | 2     |
| 8  |          |        |          |        | K   | 291.21 | 146.11 | 274.19 | 137.60 |        |        | 1     |

Query 46716 Hit 1

MS/MS Fragmentation of **DFPDEVLQLIHER**

Found in **sp|Q96SZ6|CK5P1\_HUMAN**, CDK5 regulatory subunit-associated protein 1 OS=Homo sapiens GN=CDK5RAP1 PE=1 SV=2

Match to Query 46716: 1753.911from(585.6442,3+)

Title: 901: Scan 2179 (rt=57.5496, f=2, i=316) [D:\lab212\membrane\Grace\Joyce\iTRAQ\_34\_1.raw]

Data File:Submitted from 20120508-1(merge) by Mascot Daemon on JOYCE-VAIO



Monoisotopic mass of neutral peptide Mr(calc): 1753.911

Variable modifications:

Ions Score: 43.97 Expect: 0.035

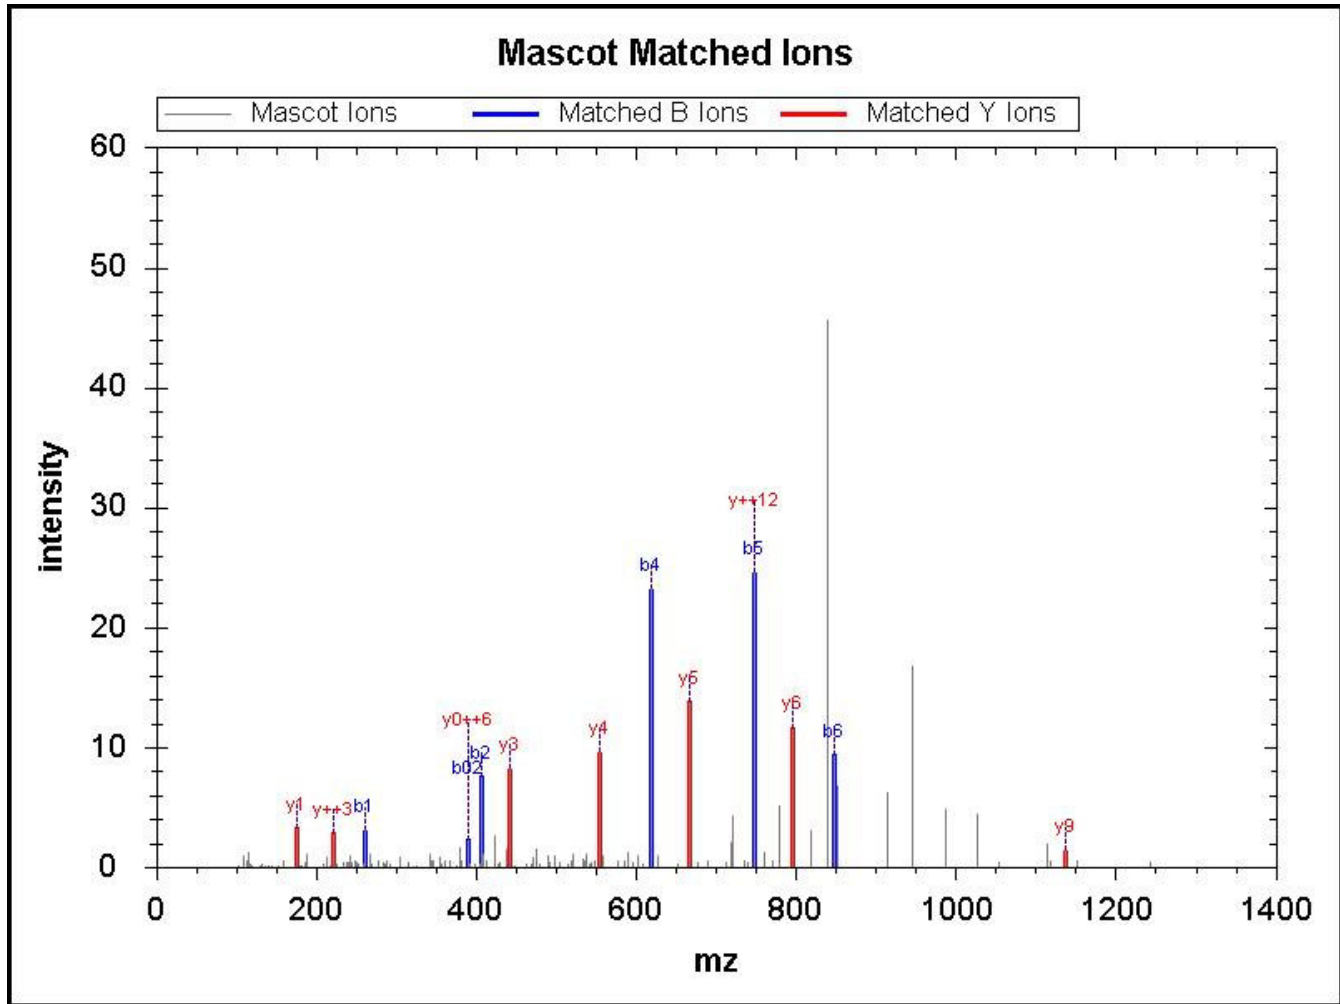

| No | b        | b++    | b*       | b*++   | b0       | b0++   | Seq | y        | y++    | y*       | y*++   | y0       | y0++   | RevNo |
|----|----------|--------|----------|--------|----------|--------|-----|----------|--------|----------|--------|----------|--------|-------|
| 1  | 260.14   | 130.57 |          |        | 242.13   | 121.57 | D   |          |        |          |        |          |        | 13    |
| 2  | 407.20   | 204.11 |          |        | 389.19   | 195.10 | F   | 1,495.79 | 748.40 | 1,478.76 | 739.89 | 1,477.78 | 739.39 | 12    |
| 3  | 504.26   | 252.63 |          |        | 486.25   | 243.63 | P   | 1,348.72 | 674.86 | 1,331.70 | 666.35 | 1,330.71 | 665.86 | 11    |
| 4  | 619.28   | 310.15 |          |        | 601.27   | 301.14 | D   | 1,251.67 | 626.34 | 1,234.64 | 617.82 | 1,233.66 | 617.33 | 10    |
| 5  | 748.33   | 374.67 |          |        | 730.32   | 365.66 | E   | 1,136.64 | 568.82 | 1,119.62 | 560.31 | 1,118.63 | 559.82 | 9     |
| 6  | 847.40   | 424.20 |          |        | 829.38   | 415.20 | V   | 1,007.60 | 504.30 | 990.57   | 495.79 | 989.59   | 495.30 | 8     |
| 7  | 960.48   | 480.74 |          |        | 942.47   | 471.74 | L   | 908.53   | 454.77 | 891.50   | 446.26 | 890.52   | 445.76 | 7     |
| 8  | 1,088.54 | 544.77 | 1,071.51 | 536.26 | 1,070.53 | 535.77 | Q   | 795.45   | 398.23 | 778.42   | 389.71 | 777.44   | 389.22 | 6     |
| 9  | 1,201.62 | 601.31 | 1,184.60 | 592.80 | 1,183.61 | 592.31 | L   | 667.39   | 334.20 | 650.36   | 325.68 | 649.38   | 325.19 | 5     |
| 10 | 1,314.71 | 657.86 | 1,297.68 | 649.34 | 1,296.70 | 648.85 | I   | 554.30   | 277.66 | 537.28   | 269.14 | 536.29   | 268.65 | 4     |
| 11 | 1,451.77 | 726.39 | 1,434.74 | 717.87 | 1,433.75 | 717.38 | H   | 441.22   | 221.11 | 424.19   | 212.60 | 423.21   | 212.11 | 3     |
| 12 | 1,580.81 | 790.91 | 1,563.78 | 782.39 | 1,562.80 | 781.90 | E   | 304.16   | 152.58 | 287.13   | 144.07 | 286.15   | 143.58 | 2     |
| 13 |          |        |          |        |          |        | R   | 175.12   | 88.06  | 158.09   | 79.55  |          |        | 1     |

Query 3621 Hit 1

MS/MS Fragmentation of LPSSGS GK

Found in sp|P57078|RIPK4\_HUMAN, Receptor-interacting serine/threonine-protein kinase 4 OS=Homo sapiens GN=RIPK4 PE=1 SV=1

Match to Query 3621: 875.527from(438.7708,2+)

Title: 82: Scan 265 (rt=15.4862, f=3, i=31) [D:\lab212\membrane\Grace\Joyce\iTRAQ\_34\_2.raw]

Data File: Submitted from 20120508-1(merge) by Mascot Daemon on JOYCE-VAIO

Monoisotopic mass of neutral peptide Mr(calc): 875.527

Variable modifications:

Ions Score: 43.87 Expect: 0.037

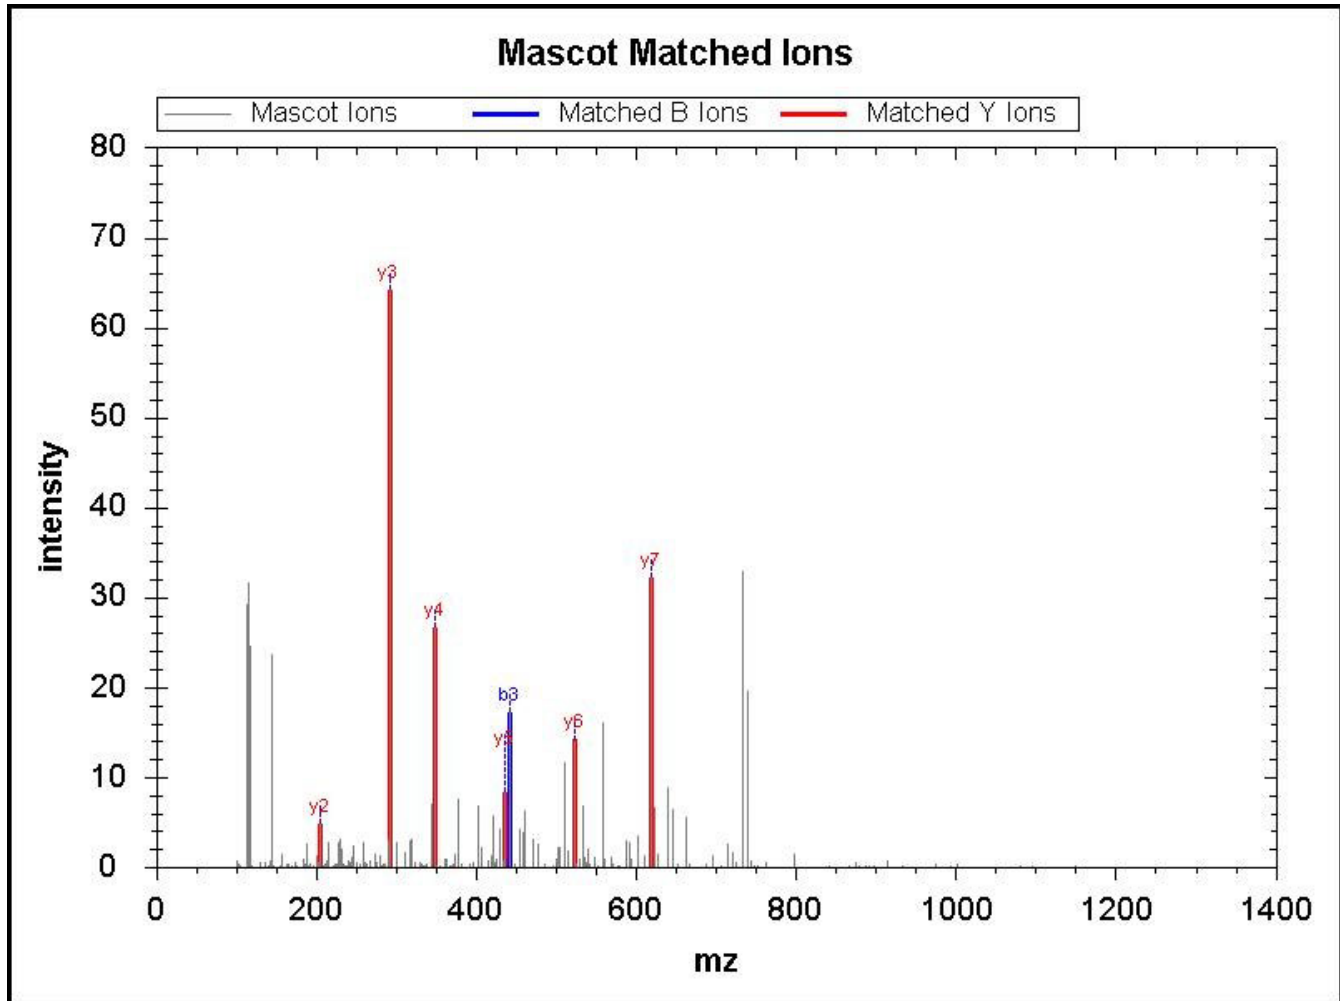

| No | b      | b++    | b0     | b0++   | Seq | y      | y++    | y*     | y*++   | y0     | y0++   | RevNo |
|----|--------|--------|--------|--------|-----|--------|--------|--------|--------|--------|--------|-------|
| 1  | 258.19 | 129.60 |        |        | L   |        |        |        |        |        |        | 8     |
| 2  | 355.25 | 178.13 |        |        | P   | 619.30 | 310.16 | 602.28 | 301.64 | 601.29 | 301.15 | 7     |
| 3  | 442.28 | 221.64 | 424.27 | 212.64 | S   | 522.25 | 261.63 | 505.23 | 253.12 | 504.24 | 252.62 | 6     |
| 4  | 529.31 | 265.16 | 511.30 | 256.15 | S   | 435.22 | 218.11 | 418.19 | 209.60 | 417.21 | 209.11 | 5     |
| 5  | 586.33 | 293.67 | 568.32 | 284.66 | G   | 348.19 | 174.60 | 331.16 | 166.08 | 330.18 | 165.59 | 4     |
| 6  | 673.36 | 337.19 | 655.35 | 328.18 | S   | 291.17 | 146.09 | 274.14 | 137.57 | 273.16 | 137.08 | 3     |
| 7  | 730.39 | 365.70 | 712.37 | 356.69 | G   | 204.13 | 102.57 | 187.11 | 94.06  |        |        | 2     |
| 8  |        |        |        |        | K   | 147.11 | 74.06  | 130.09 | 65.55  |        |        | 1     |

Query 6566 Hit 1

MS/MS Fragmentation of **GTSSFGK**

Found in [sp|P61927|RL37\\_HUMAN](#), 60S ribosomal protein L37 OS=Homo sapiens GN=RPL37 PE=1 SV=2

Match to Query 6566: 970.5325from(486.2735,2+)

Title: 77: Scan 253 (rt=15.2147, f=3, i=29) [D:\lab212\membrane\GraceJoyce\iTRAQ\_34\_2.raw]

Data File: Submitted from 20120508-1(merge) by Mascot Daemon on JOYCE-VAIO

Monoisotopic mass of neutral peptide Mr(calc): 970.5325

Variable modifications:

K7 :iTRAQ4plex (K)

Ions Score: 43.63 Expect: 0.022

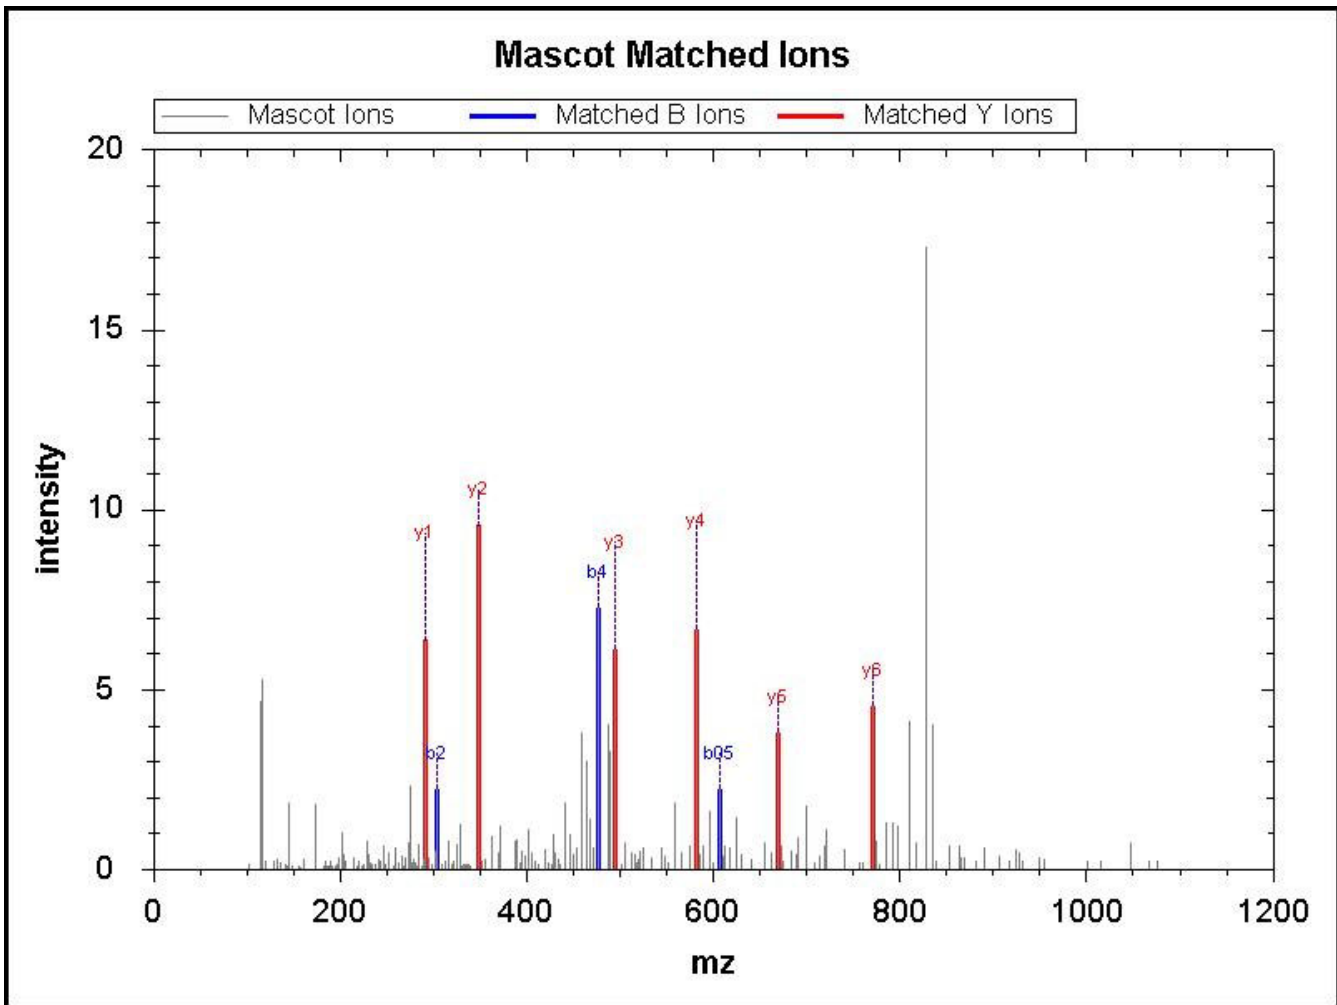

| No | b      | b++    | b0     | b0++   | Seq | y      | y++    | y*     | y*++   | y0     | y0++   | RevNo |
|----|--------|--------|--------|--------|-----|--------|--------|--------|--------|--------|--------|-------|
| 1  | 202.13 | 101.57 |        |        | G   |        |        |        |        |        |        | 7     |
| 2  | 303.18 | 152.09 | 285.17 | 143.09 | T   | 770.42 | 385.71 | 753.39 | 377.20 | 752.41 | 376.71 | 6     |
| 3  | 390.21 | 195.61 | 372.20 | 186.60 | S   | 669.37 | 335.19 | 652.34 | 326.67 | 651.36 | 326.18 | 5     |
| 4  | 477.24 | 239.12 | 459.23 | 230.12 | S   | 582.34 | 291.67 | 565.31 | 283.16 | 564.33 | 282.67 | 4     |
| 5  | 624.31 | 312.66 | 606.30 | 303.65 | F   | 495.30 | 248.16 | 478.28 | 239.64 |        |        | 3     |
| 6  | 681.33 | 341.17 | 663.32 | 332.16 | G   | 348.24 | 174.62 | 331.21 | 166.11 |        |        | 2     |
| 7  |        |        |        |        | K   | 291.21 | 146.11 | 274.19 | 137.60 |        |        | 1     |

Query 13672 Hit 1

MS/MS Fragmentation of **AGIFQSVK**

Found in **sp|P09669|COX6C\_HUMAN**, Cytochrome c oxidase subunit 6C OS=Homo sapiens GN=COX6C PE=1 SV=2

Match to Query 13672: 1136.68 from (569.3474, 2+)

Title: 382: Sum of 2 scans in range 912 (rt=29.9613, f=4, i=251) to 913 (rt=29.9867, f=4, i=252)

[D:\lab212\membrane\Grace\Joyce\iTRAQ\_32\_2.raw]

Data File: Submitted from 20120508-1 (merge) by Mascot Daemon on JOYCE-VAIO

Monoisotopic mass of neutral peptide Mr(calc): 1136.68

Variable modifications:

K8 :iTRAQ4plex (K)

Ions Score: 43.63 Expect: 0.025

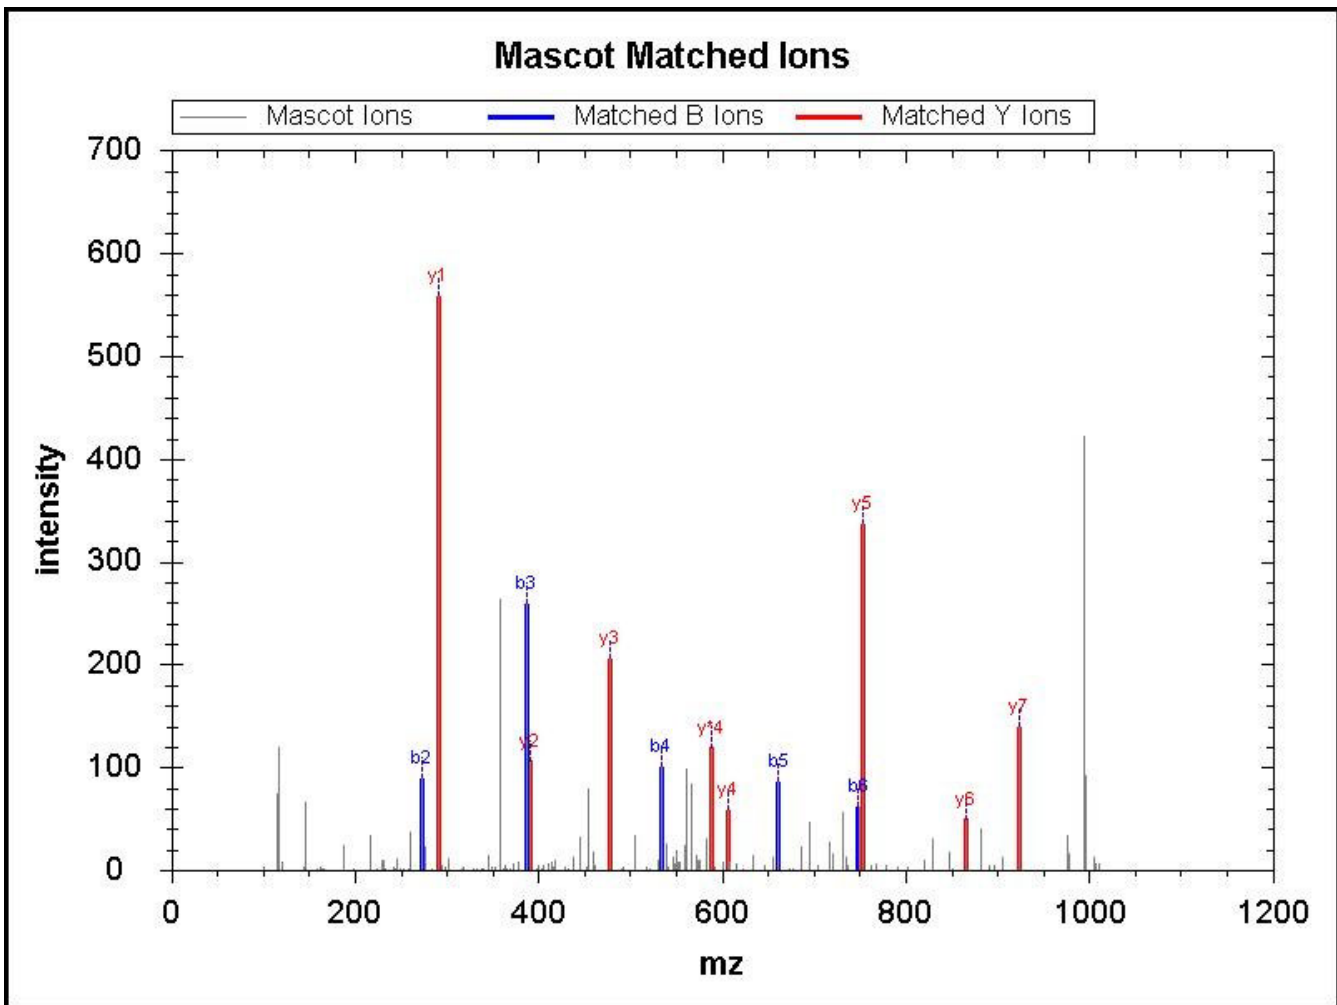

| No | b      | b++    | b*     | b***   | b0     | b0++   | Seq | y      | y++    | y*     | y***   | y0     | y0++   | RevNo |
|----|--------|--------|--------|--------|--------|--------|-----|--------|--------|--------|--------|--------|--------|-------|
| 1  | 216.15 | 108.58 |        |        |        |        | A   |        |        |        |        |        |        | 8     |
| 2  | 273.17 | 137.09 |        |        |        |        | G   | 922.55 | 461.78 | 905.52 | 453.26 | 904.54 | 452.77 | 7     |
| 3  | 386.25 | 193.63 |        |        |        |        | I   | 865.53 | 433.27 | 848.50 | 424.75 | 847.52 | 424.26 | 6     |
| 4  | 533.32 | 267.16 |        |        |        |        | F   | 752.44 | 376.72 | 735.42 | 368.21 | 734.43 | 367.72 | 5     |
| 5  | 661.38 | 331.19 | 644.35 | 322.68 |        |        | Q   | 605.37 | 303.19 | 588.35 | 294.68 | 587.36 | 294.19 | 4     |
| 6  | 748.41 | 374.71 | 731.38 | 366.20 | 730.40 | 365.70 | S   | 477.32 | 239.16 | 460.29 | 230.65 | 459.30 | 230.16 | 3     |
| 7  | 847.48 | 424.24 | 830.45 | 415.73 | 829.47 | 415.24 | V   | 390.28 | 195.65 | 373.26 | 187.13 |        |        | 2     |
| 8  |        |        |        |        |        |        | K   | 291.21 | 146.11 | 274.19 | 137.60 |        |        | 1     |

Query 9047 Hit 1

MS/MS Fragmentation of **MLGGVFK**

Found in **sp|Q96MU7|YTDC1\_HUMAN**, YTH domain-containing protein 1 OS=Homo sapiens GN=YTHDC1 PE=1 SV=3

Match to Query 9047: 1038.614from(520.3143,2+)

Title: 533: Scan 1240 (rt=37.3482, f=3, i=185) [D:\lab212\membrane\Grace\Joyce\iTRAQ\_32\_2.raw]

Data File: Submitted from 20120508-1(merge) by Mascot Daemon on JOYCE-VAIO

Monoisotopic mass of neutral peptide Mr(calc): 1038.614

Variable modifications:

K7 :iTRAQ4plex (K)

Ions Score: 43.53 Expect: 0.022

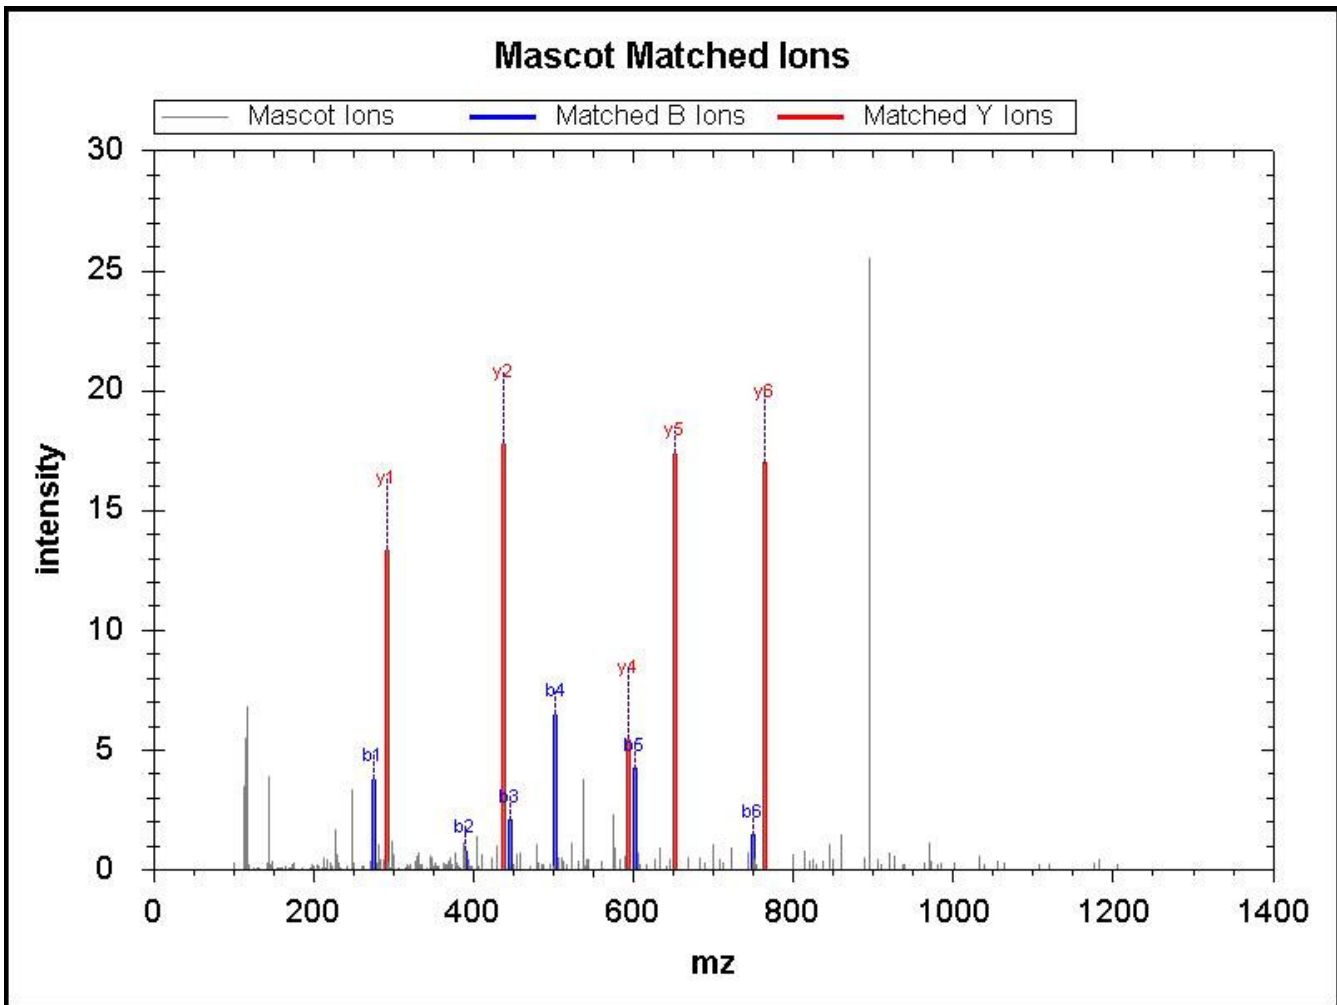

| No | b      | b++    | Seq | y      | y++    | y*     | y*++   | RevNo |
|----|--------|--------|-----|--------|--------|--------|--------|-------|
| 1  | 276.15 | 138.58 | M   |        |        |        |        | 7     |
| 2  | 389.23 | 195.12 | L   | 764.48 | 382.74 | 747.45 | 374.23 | 6     |
| 3  | 446.26 | 223.63 | G   | 651.39 | 326.20 | 634.37 | 317.69 | 5     |
| 4  | 503.28 | 252.14 | G   | 594.37 | 297.69 | 577.35 | 289.18 | 4     |
| 5  | 602.35 | 301.68 | V   | 537.35 | 269.18 | 520.33 | 260.67 | 3     |
| 6  | 749.41 | 375.21 | F   | 438.28 | 219.65 | 421.26 | 211.13 | 2     |
| 7  |        |        | K   | 291.21 | 146.11 | 274.19 | 137.60 | 1     |

Query 74786 Hit 1

MS/MS Fragmentation of **HVVLPVDDSDLNVVASFDR**

Found in **sp|Q15291|RBBP5\_HUMAN**, Retinoblastoma-binding protein 5 OS=Homo sapiens GN=RBBP5 PE=1 SV=2

Match to Query 74786: 2355.182from(786.068,3+)

Title: 771: Sum of 2 scans in range 1705 (rt=47.9352, f=4, i=513) to 1706 (rt=47.9607, f=4, i=514)

[D:\lab212\membrane\GraceJoyce\iTRAQ\_34\_2.raw]

Data File: Submitted from 20120508-1(merge) by Mascot Daemon on JOYCE-VAIO

Monoisotopic mass of neutral peptide Mr(calc): 2355.182

Variable modifications:

Ions Score: 43.52 Expect: 0.043



Found in [sp|A8MXV6|CD15L\\_HUMAN](#), CMT1A duplicated region transcript 15 protein-like protein OS=Homo sapiens GN=CDRT15L2 PE=2 SV=1

Match to Query 17872: 1217.727from(609.8707,2+)

Title: 797: Sum of 2 scans in range 1811 (rt=50.1527, f=4, i=525) to 1812 (rt=50.1781, f=4, i=526)

[D:\lab212\membrane\Grace\Joyce\iTRAQ\_25\_2.raw]

Data File:Submitted from 20120508-1(merge) by Mascot Daemon on JOYCE-VAIO

Monoisotopic mass of neutral peptide Mr(calc): 1217.727

Variable modifications:

K3 iTRAQ4plex (K)

Ions Score: 43.46 Expect: 0.032

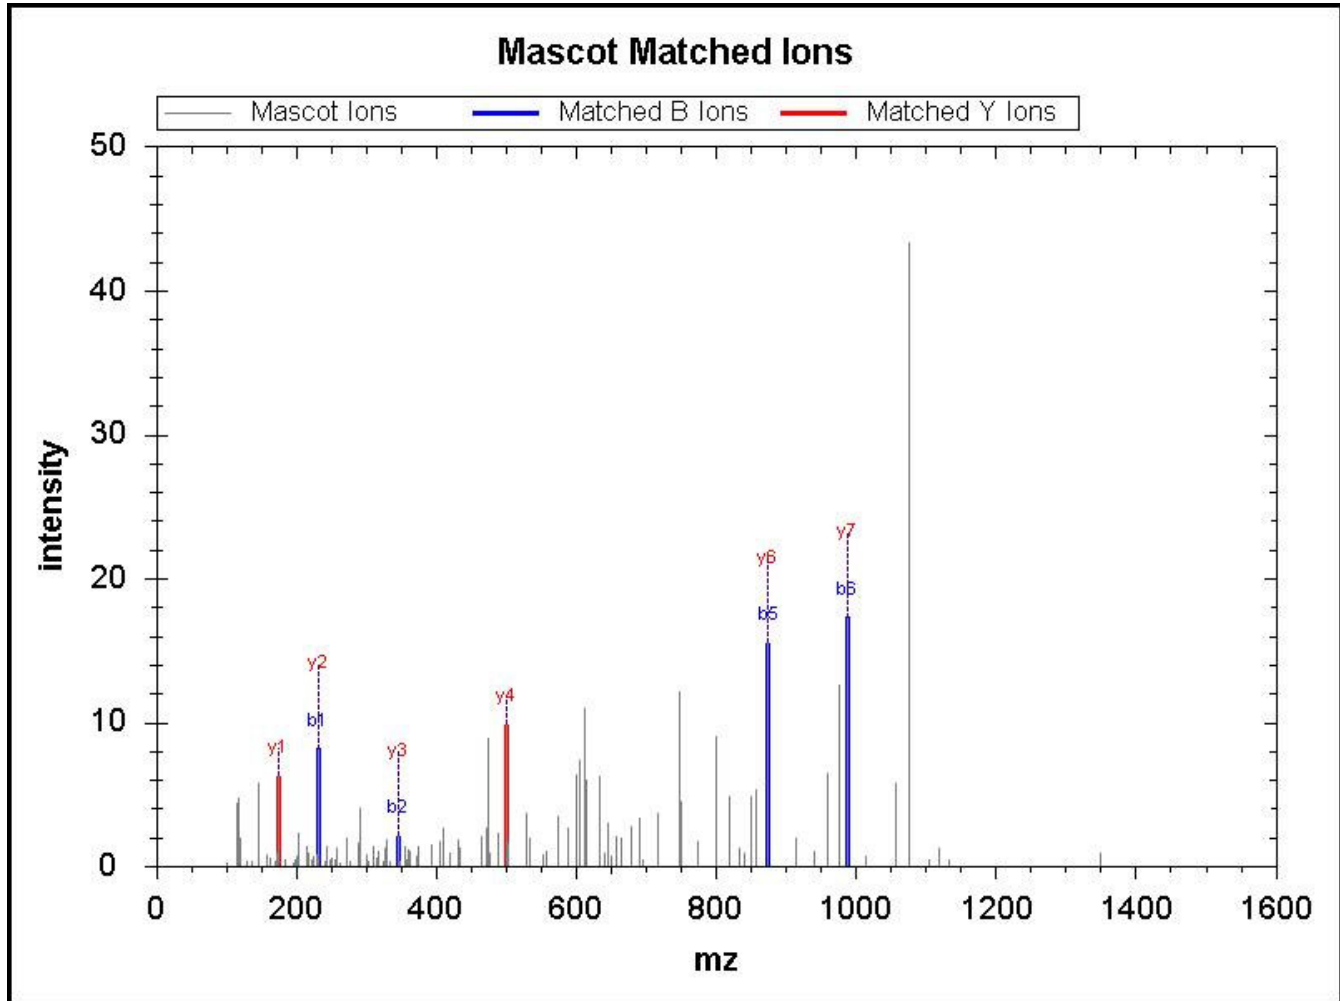

| No | b        | b++    | b*       | b*++   | b0       | b0++   | Seq | y      | y++    | y*     | y*++   | y0     | y0++   | RevNo |
|----|----------|--------|----------|--------|----------|--------|-----|--------|--------|--------|--------|--------|--------|-------|
| 1  | 232.14   | 116.57 |          |        | 214.13   | 107.57 | S   |        |        |        |        |        |        | 8     |
| 2  | 345.23   | 173.12 |          |        | 327.21   | 164.11 | I   | 987.65 | 494.33 | 970.63 | 485.82 | 969.64 | 485.33 | 7     |
| 3  | 617.42   | 309.21 | 600.40   | 300.70 | 599.41   | 300.21 | K   | 874.57 | 437.79 | 857.54 | 429.28 | 856.56 | 428.78 | 6     |
| 4  | 718.47   | 359.74 | 701.44   | 351.23 | 700.46   | 350.73 | T   | 602.37 | 301.69 | 585.35 | 293.18 | 584.36 | 292.68 | 5     |
| 5  | 874.57   | 437.79 | 857.54   | 429.28 | 856.56   | 428.78 | R   | 501.33 | 251.17 | 484.30 | 242.65 |        |        | 4     |
| 6  | 987.66   | 494.33 | 970.63   | 485.82 | 969.64   | 485.33 | L   | 345.22 | 173.12 | 328.20 | 164.60 |        |        | 3     |
| 7  | 1,044.68 | 522.84 | 1,027.65 | 514.33 | 1,026.67 | 513.84 | G   | 232.14 | 116.57 | 215.11 | 108.06 |        |        | 2     |
| 8  |          |        |          |        |          |        | R   | 175.12 | 88.06  | 158.09 | 79.55  |        |        | 1     |

Query 90838 Hit 1

MS/MS Fragmentation of **VLSVDESHIKPEQEFFTAPFEK**

Found in [sp|Q4KMQ2|ANO6\\_HUMAN](#), Anoctamin-6 OS=Homo sapiens GN=ANO6 PE=1 SV=2

Match to Query 90838: 2984.604from(747.1582,4+)

Title: 967: Scan 2141 (rt=57.6398, f=2, i=338) [D:\lab212\membrane\Grace\Joyce\iTRAQ\_36\_2.raw]

Data File:Submitted from 20120508-1(merge) by Mascot Daemon on JOYCE-VAIO

Monoisotopic mass of neutral peptide Mr(calc): 2984.604

Variable modifications:

K10 iTRAQ4plex (K)  
 K22 iTRAQ4plex (K)  
 Ions Score: 43.4 Expect: 0.026

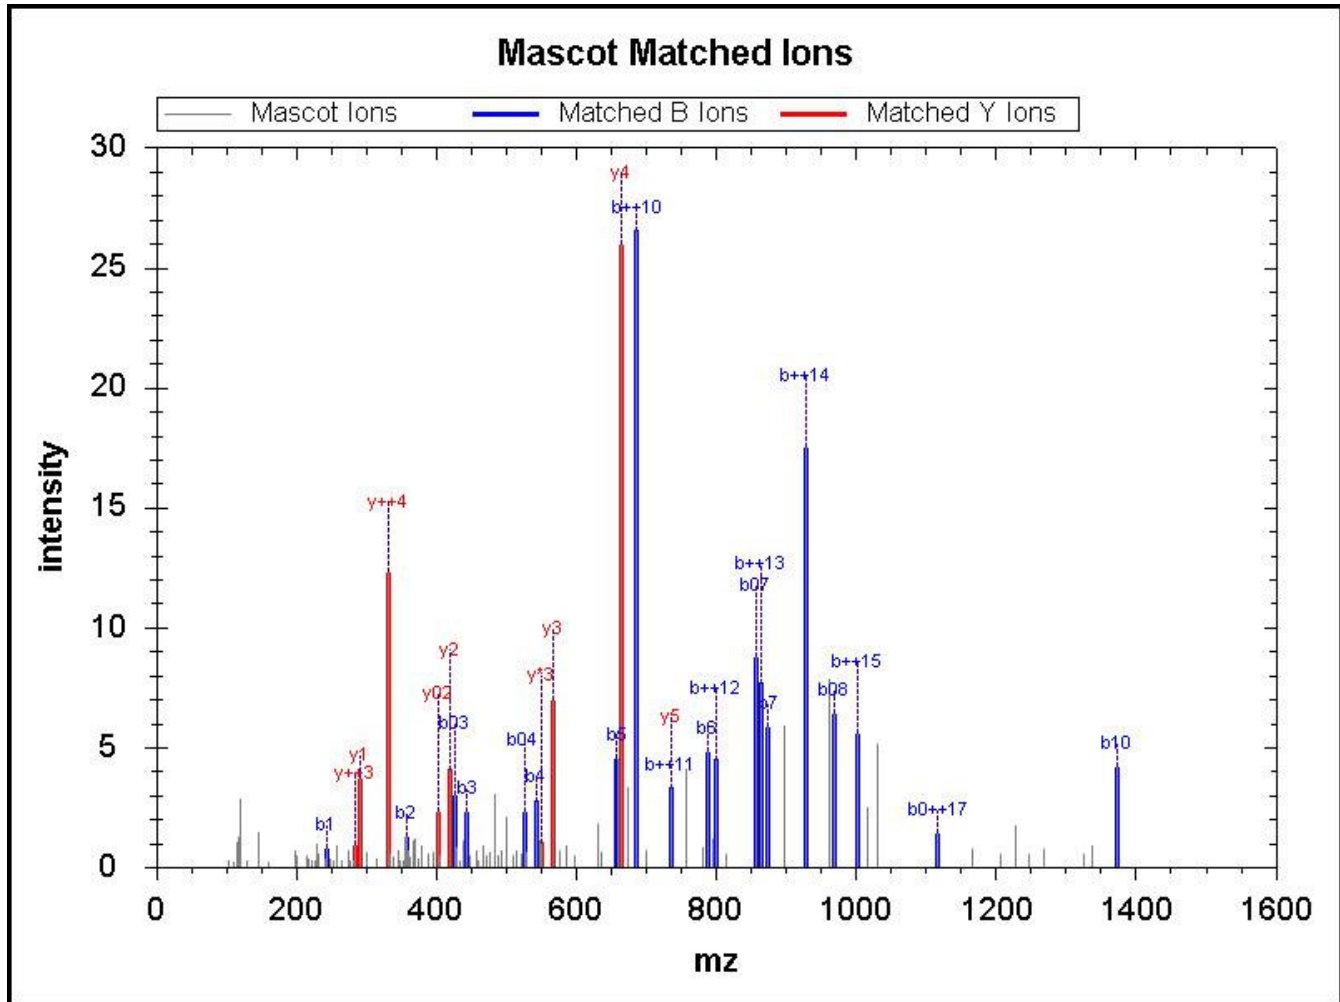

| No | b        | b++      | b*       | b*++     | b0       | b0++     | Seq | y        | y++      | y*       | y*++     | y0       | y0++     | RevNo |
|----|----------|----------|----------|----------|----------|----------|-----|----------|----------|----------|----------|----------|----------|-------|
| 1  | 244.18   | 122.59   |          |          |          |          | V   |          |          |          |          |          |          | 22    |
| 2  | 357.26   | 179.13   |          |          |          |          | L   | 2,742.45 | 1,371.73 | 2,725.42 | 1,363.21 | 2,724.44 | 1,362.72 | 21    |
| 3  | 444.29   | 222.65   |          |          | 426.28   | 213.65   | S   | 2,629.36 | 1,315.19 | 2,612.34 | 1,306.67 | 2,611.35 | 1,306.18 | 20    |
| 4  | 543.36   | 272.18   |          |          | 525.35   | 263.18   | V   | 2,542.33 | 1,271.67 | 2,525.31 | 1,263.16 | 2,524.32 | 1,262.66 | 19    |
| 5  | 658.39   | 329.70   |          |          | 640.38   | 320.69   | D   | 2,443.26 | 1,222.14 | 2,426.24 | 1,213.62 | 2,425.25 | 1,213.13 | 18    |
| 6  | 787.43   | 394.22   |          |          | 769.42   | 385.21   | E   | 2,328.24 | 1,164.62 | 2,311.21 | 1,156.11 | 2,310.23 | 1,155.62 | 17    |
| 7  | 874.46   | 437.74   |          |          | 856.45   | 428.73   | S   | 2,199.19 | 1,100.10 | 2,182.17 | 1,091.59 | 2,181.18 | 1,091.10 | 16    |
| 8  | 987.55   | 494.28   |          |          | 969.54   | 485.27   | I   | 2,112.16 | 1,056.58 | 2,095.14 | 1,048.07 | 2,094.15 | 1,047.58 | 15    |
| 9  | 1,100.63 | 550.82   |          |          | 1,082.62 | 541.81   | I   | 1,999.08 | 1,000.04 | 1,982.05 | 991.53   | 1,981.07 | 991.04   | 14    |
| 10 | 1,372.83 | 686.92   | 1,355.80 | 678.40   | 1,354.82 | 677.91   | K   | 1,885.99 | 943.50   | 1,868.97 | 934.99   | 1,867.98 | 934.50   | 13    |
| 11 | 1,469.88 | 735.44   | 1,452.86 | 726.93   | 1,451.87 | 726.44   | P   | 1,613.80 | 807.40   | 1,596.77 | 798.89   | 1,595.79 | 798.40   | 12    |
| 12 | 1,598.92 | 799.97   | 1,581.90 | 791.45   | 1,580.91 | 790.96   | E   | 1,516.74 | 758.88   | 1,499.72 | 750.36   | 1,498.73 | 749.87   | 11    |
| 13 | 1,726.98 | 864.00   | 1,709.96 | 855.48   | 1,708.97 | 854.99   | Q   | 1,387.70 | 694.35   | 1,370.68 | 685.84   | 1,369.69 | 685.35   | 10    |
| 14 | 1,856.03 | 928.52   | 1,839.00 | 920.00   | 1,838.01 | 919.51   | E   | 1,259.64 | 630.33   | 1,242.62 | 621.81   | 1,241.63 | 621.32   | 9     |
| 15 | 2,003.09 | 1,002.05 | 1,986.07 | 993.54   | 1,985.08 | 993.05   | F   | 1,130.60 | 565.80   | 1,113.57 | 557.29   | 1,112.59 | 556.80   | 8     |
| 16 | 2,150.16 | 1,075.58 | 2,133.14 | 1,067.07 | 2,132.15 | 1,066.58 | F   | 983.53   | 492.27   | 966.51   | 483.76   | 965.52   | 483.26   | 7     |
| 17 | 2,251.21 | 1,126.11 | 2,234.18 | 1,117.60 | 2,233.20 | 1,117.10 | T   | 836.46   | 418.74   | 819.44   | 410.22   | 818.45   | 409.73   | 6     |
| 18 | 2,322.25 | 1,161.63 | 2,305.22 | 1,153.11 | 2,304.24 | 1,152.62 | A   | 735.42   | 368.21   | 718.39   | 359.70   | 717.41   | 359.21   | 5     |
| 19 | 2,419.30 | 1,210.15 | 2,402.27 | 1,201.64 | 2,401.29 | 1,201.15 | P   | 664.38   | 332.69   | 647.35   | 324.18   | 646.37   | 323.69   | 4     |
| 20 | 2,566.37 | 1,283.69 | 2,549.34 | 1,275.17 | 2,548.36 | 1,274.68 | F   | 567.33   | 284.17   | 550.30   | 275.65   | 549.32   | 275.16   | 3     |
| 21 | 2,695.41 | 1,348.21 | 2,678.38 | 1,339.70 | 2,677.40 | 1,339.20 | E   | 420.26   | 210.63   | 403.23   | 202.12   | 402.25   | 201.63   | 2     |





|    |          |          |          |          |          |          |   |        |        |        |        |        |        |   |
|----|----------|----------|----------|----------|----------|----------|---|--------|--------|--------|--------|--------|--------|---|
| 13 | 1,687.85 | 844.43   | 1,670.82 | 835.91   | 1,669.84 | 835.42   | I | 887.50 | 444.25 | 870.47 | 435.74 | 869.48 | 435.25 | 6 |
| 14 | 1,816.89 | 908.95   | 1,799.86 | 900.44   | 1,798.88 | 899.94   | E | 774.41 | 387.71 | 757.38 | 379.20 | 756.40 | 378.70 | 5 |
| 15 | 1,945.93 | 973.47   | 1,928.91 | 964.96   | 1,927.92 | 964.47   | E | 645.37 | 323.19 | 628.34 | 314.67 | 627.36 | 314.18 | 4 |
| 16 | 2,073.99 | 1,037.50 | 2,056.97 | 1,028.99 | 2,055.98 | 1,028.49 | Q | 516.33 | 258.67 | 499.30 | 250.15 |        |        | 3 |
| 17 | 2,171.04 | 1,086.03 | 2,154.02 | 1,077.51 | 2,153.03 | 1,077.02 | P | 388.27 | 194.64 | 371.24 | 186.12 |        |        | 2 |
| 18 |          |          |          |          |          |          | K | 291.21 | 146.11 | 274.19 | 137.60 |        |        | 1 |

Query 71359 Hit 1

MS/MS Fragmentation of **QRPADAEDLPAAPGQSIDK**

Found in **sp|Q8N6R0|MTL13\_HUMAN**, Methyltransferase-like protein 13 OS=Homo sapiens GN=METTL13 PE=1 SV=1

Match to Query 71359: 2266.171 from (756.3976,3+)

Title: 339: Sum of 2 scans in range 772 (rt=27.1417, f=4, i=229) to 773 (rt=27.1671, f=4, i=230)

[D:\lab212\membrane\Grace\Joyce\iTRAQ40.raw]

Data File: Submitted from 20120508-1(merge) by Mascot Daemon on JOYCE-VAIO

Monoisotopic mass of neutral peptide Mr(calc): 2266.171

Variable modifications:

K19 iTRAQ4plex (K)

Ions Score: 43.32 Expect: 0.044

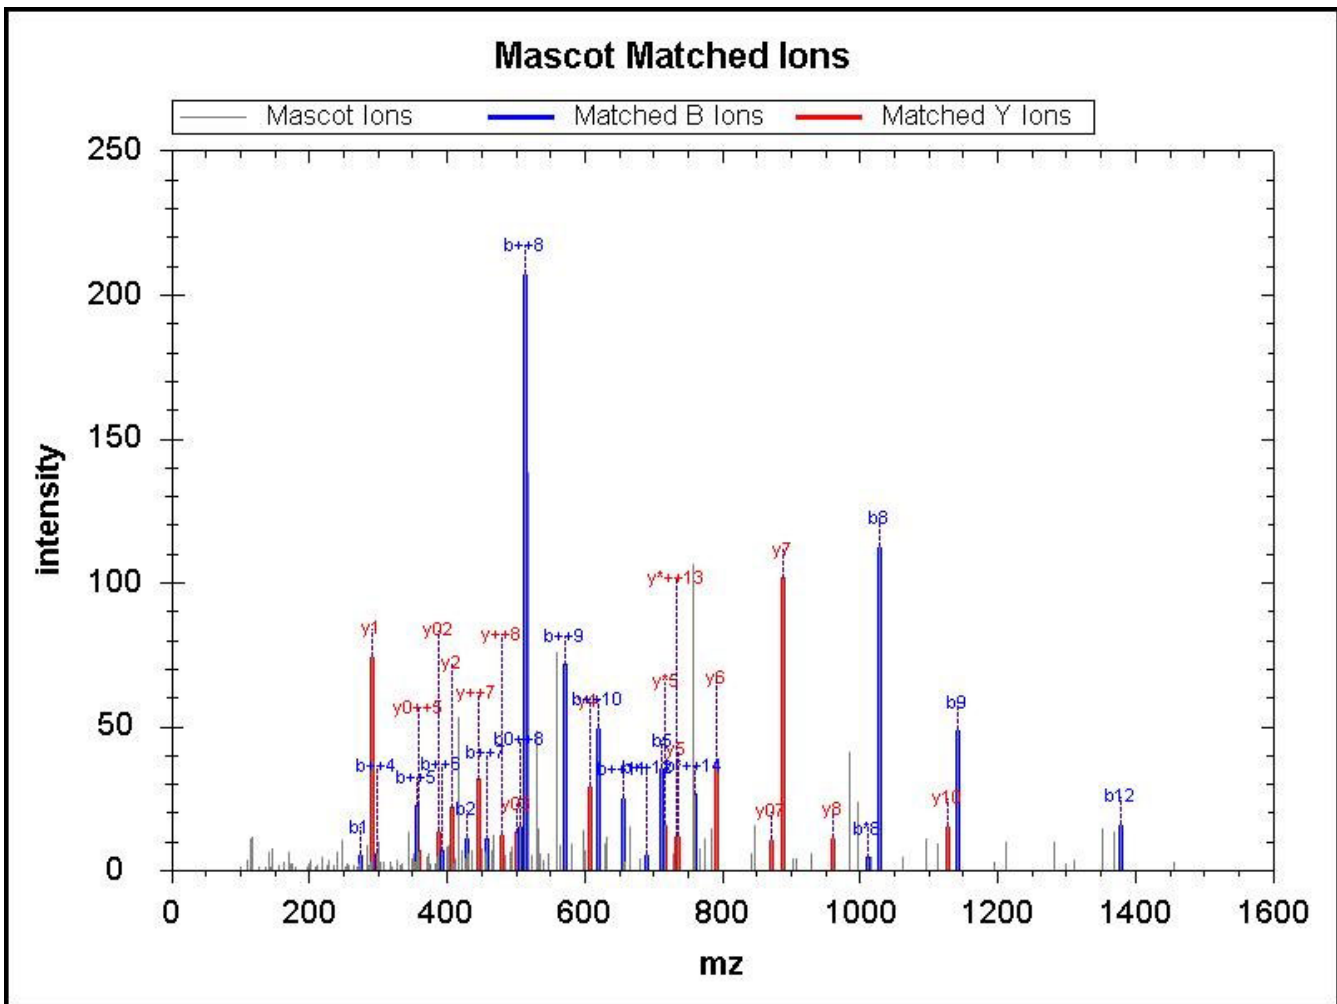

|    |          |        |          |        |          |        |   |          |        |          |        |          |        |    |
|----|----------|--------|----------|--------|----------|--------|---|----------|--------|----------|--------|----------|--------|----|
| 8  | 1,027.49 | 514.25 | 1,010.47 | 505.74 | 1,009.48 | 505.24 | D | 1,355.73 | 678.37 | 1,338.70 | 669.85 | 1,337.72 | 669.36 | 12 |
| 9  | 1,140.58 | 570.79 | 1,123.55 | 562.28 | 1,122.57 | 561.79 | L | 1,240.70 | 620.85 | 1,223.68 | 612.34 | 1,222.69 | 611.85 | 11 |
| 10 | 1,237.63 | 619.32 | 1,220.60 | 610.81 | 1,219.62 | 610.31 | P | 1,127.62 | 564.31 | 1,110.59 | 555.80 | 1,109.61 | 555.31 | 10 |
| 11 | 1,308.67 | 654.84 | 1,291.64 | 646.32 | 1,290.66 | 645.83 | A | 1,030.56 | 515.79 | 1,013.54 | 507.27 | 1,012.55 | 506.78 | 9  |
| 12 | 1,379.70 | 690.36 | 1,362.68 | 681.84 | 1,361.69 | 681.35 | A | 959.53   | 480.27 | 942.50   | 471.75 | 941.52   | 471.26 | 8  |
| 13 | 1,476.76 | 738.88 | 1,459.73 | 730.37 | 1,458.75 | 729.88 | P | 888.49   | 444.75 | 871.46   | 436.24 | 870.48   | 435.74 | 7  |
| 14 | 1,533.78 | 767.39 | 1,516.75 | 758.88 | 1,515.77 | 758.39 | G | 791.44   | 396.22 | 774.41   | 387.71 | 773.43   | 387.22 | 6  |
| 15 | 1,661.84 | 831.42 | 1,644.81 | 822.91 | 1,643.83 | 822.42 | Q | 734.42   | 367.71 | 717.39   | 359.20 | 716.41   | 358.71 | 5  |
| 16 | 1,748.87 | 874.94 | 1,731.84 | 866.42 | 1,730.86 | 865.93 | S | 606.36   | 303.68 | 589.33   | 295.17 | 588.35   | 294.68 | 4  |
| 17 | 1,861.95 | 931.48 | 1,844.93 | 922.97 | 1,843.94 | 922.47 | I | 519.33   | 260.17 | 502.30   | 251.65 | 501.32   | 251.16 | 3  |
| 18 | 1,976.98 | 988.99 | 1,959.95 | 980.48 | 1,958.97 | 979.99 | D | 406.24   | 203.62 | 389.22   | 195.11 | 388.23   | 194.62 | 2  |
| 19 |          |        |          |        |          |        | K | 291.21   | 146.11 | 274.19   | 137.60 |          |        | 1  |

Query 64947 Hit 1

MS/MS Fragmentation of **VQVVDEEGDQQHQEGK**

Found in **sp|Q02447|SP3\_HUMAN**, Transcription factor Sp3 OS=Homo sapiens GN=SP3 PE=1 SV=3

Match to Query 64947: 2112.036from(705.0193,3+)

Title: 194: Sum of 2 scans in range 477 (rt=20.4235, f=4, i=125) to 478 (rt=20.449, f=4, i=126)

[D:\lab212\membrane\GraceJoyce\iTRAQ\_40\_1.raw]

Data File:Submitted from 20120508-1(merge) by Mascot Daemon on JOYCE-VAIO

Monoisotopic mass of neutral peptide Mr(calc): 2112.036

Variable modifications:

K16 :iTRAQ4plex (K)

Ions Score: 43.32 Expect: 0.041

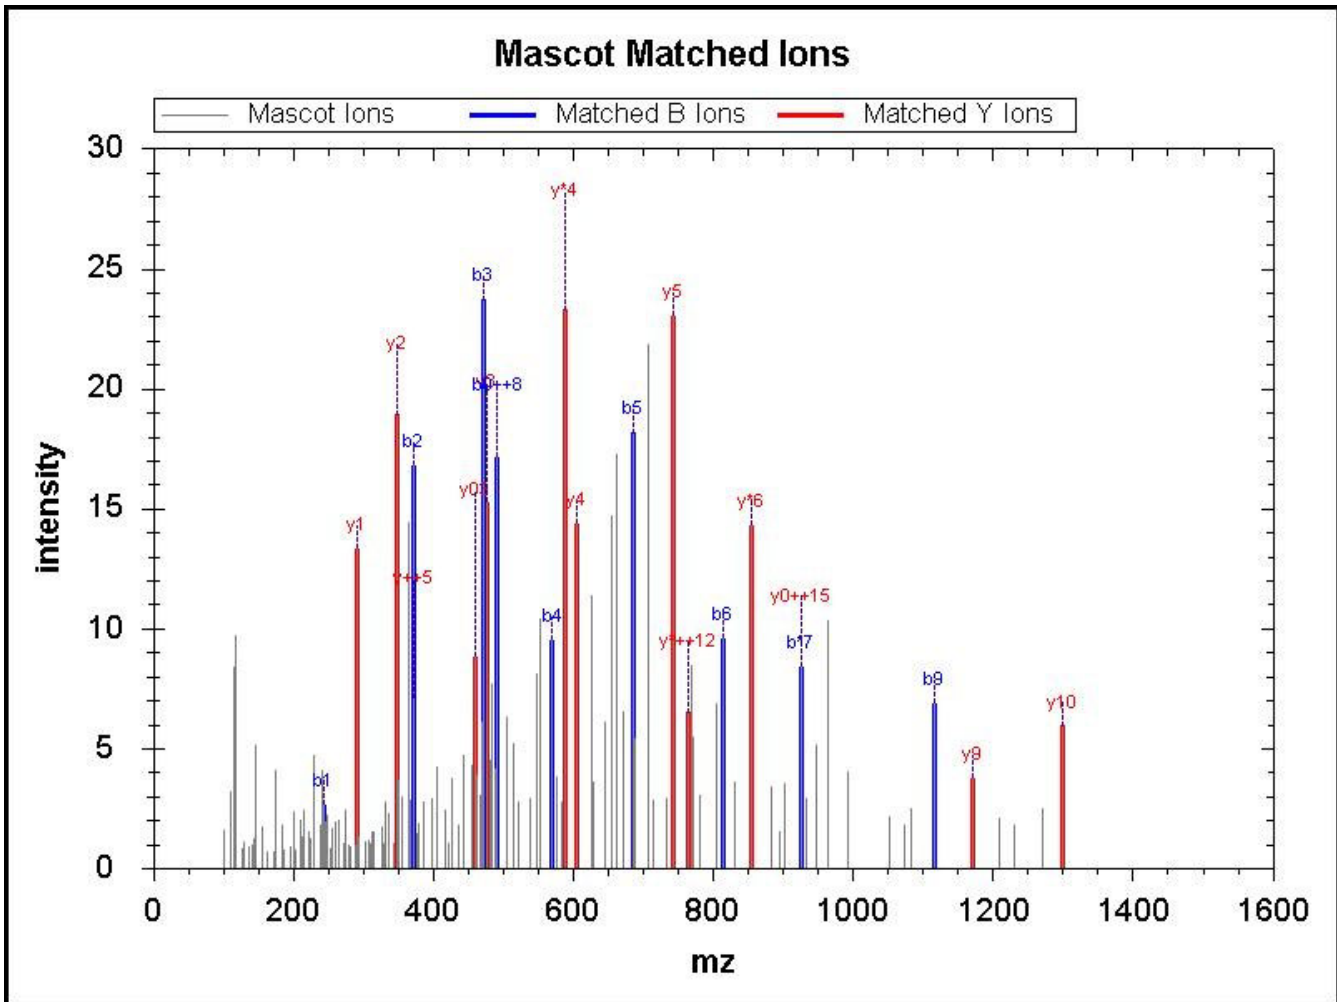

| No | b      | b++    | b* | b*++ | b0 | b0++ | Seq | y | y++ | y* | y*++ | y0 | y0++ | RevNo |
|----|--------|--------|----|------|----|------|-----|---|-----|----|------|----|------|-------|
| 1  | 244.18 | 122.59 |    |      |    |      | V   |   |     |    |      |    |      | 16    |

|    |          |        |          |        |          |        |   |          |        |          |        |          |        |    |
|----|----------|--------|----------|--------|----------|--------|---|----------|--------|----------|--------|----------|--------|----|
| 2  | 372.24   | 186.62 | 355.21   | 178.11 |          |        | Q | 1,869.87 | 935.44 | 1,852.84 | 926.93 | 1,851.86 | 926.43 | 15 |
| 3  | 471.30   | 236.16 | 454.28   | 227.64 |          |        | V | 1,741.81 | 871.41 | 1,724.78 | 862.90 | 1,723.80 | 862.40 | 14 |
| 4  | 570.37   | 285.69 | 553.35   | 277.18 |          |        | V | 1,642.74 | 821.87 | 1,625.72 | 813.36 | 1,624.73 | 812.87 | 13 |
| 5  | 685.40   | 343.20 | 668.37   | 334.69 | 667.39   | 334.20 | D | 1,543.67 | 772.34 | 1,526.65 | 763.83 | 1,525.66 | 763.34 | 12 |
| 6  | 814.44   | 407.72 | 797.42   | 399.21 | 796.43   | 398.72 | E | 1,428.65 | 714.83 | 1,411.62 | 706.31 | 1,410.64 | 705.82 | 11 |
| 7  | 943.49   | 472.25 | 926.46   | 463.73 | 925.47   | 463.24 | E | 1,299.60 | 650.31 | 1,282.58 | 641.79 | 1,281.59 | 641.30 | 10 |
| 8  | 1,000.51 | 500.76 | 983.48   | 492.24 | 982.50   | 491.75 | G | 1,170.56 | 585.78 | 1,153.54 | 577.27 | 1,152.55 | 576.78 | 9  |
| 9  | 1,115.53 | 558.27 | 1,098.51 | 549.76 | 1,097.52 | 549.27 | D | 1,113.54 | 557.27 | 1,096.51 | 548.76 | 1,095.53 | 548.27 | 8  |
| 10 | 1,243.59 | 622.30 | 1,226.57 | 613.79 | 1,225.58 | 613.29 | Q | 998.51   | 499.76 | 981.49   | 491.25 | 980.50   | 490.76 | 7  |
| 11 | 1,371.65 | 686.33 | 1,354.62 | 677.82 | 1,353.64 | 677.32 | Q | 870.45   | 435.73 | 853.43   | 427.22 | 852.44   | 426.73 | 6  |
| 12 | 1,508.71 | 754.86 | 1,491.68 | 746.35 | 1,490.70 | 745.85 | H | 742.40   | 371.70 | 725.37   | 363.19 | 724.39   | 362.70 | 5  |
| 13 | 1,636.77 | 818.89 | 1,619.74 | 810.37 | 1,618.76 | 809.88 | Q | 605.34   | 303.17 | 588.31   | 294.66 | 587.33   | 294.17 | 4  |
| 14 | 1,765.81 | 883.41 | 1,748.78 | 874.90 | 1,747.80 | 874.40 | E | 477.28   | 239.14 | 460.25   | 230.63 | 459.27   | 230.14 | 3  |
| 15 | 1,822.83 | 911.92 | 1,805.81 | 903.41 | 1,804.82 | 902.91 | G | 348.24   | 174.62 | 331.21   | 166.11 |          |        | 2  |
| 16 |          |        |          |        |          |        | K | 291.21   | 146.11 | 274.19   | 137.60 |          |        | 1  |

Query 77235 Hit 1

MS/MS Fragmentation of **WEVLIIGPPDTLYEGGVFK**

Found in **sp|P62253|UB2G1\_HUMAN**, Ubiquitin-conjugating enzyme E2 G1 OS=Homo sapiens GN=UBE2G1 PE=1 SV=3

Match to Query 77235: 2420.318from(807.7798,3+)

Title: 1071: Sum of 2 scans in range 2476 (rt=64.5887, f=4, i=701) to 2477 (rt=64.6141, f=4, i=702)

[D:\lab212\membrane\GraceJoyce\iTRAQ\_24\_1.raw]

Data File: Submitted from 20120508-1(merge) by Mascot Daemon on JOYCE-VAIO

Monoisotopic mass of neutral peptide Mr(calc): 2420.318

Variable modifications:

K19 :iTRAQ4plex (K)

Ions Score: 43.24 Expect: 0.033

### Mascot Matched Ions

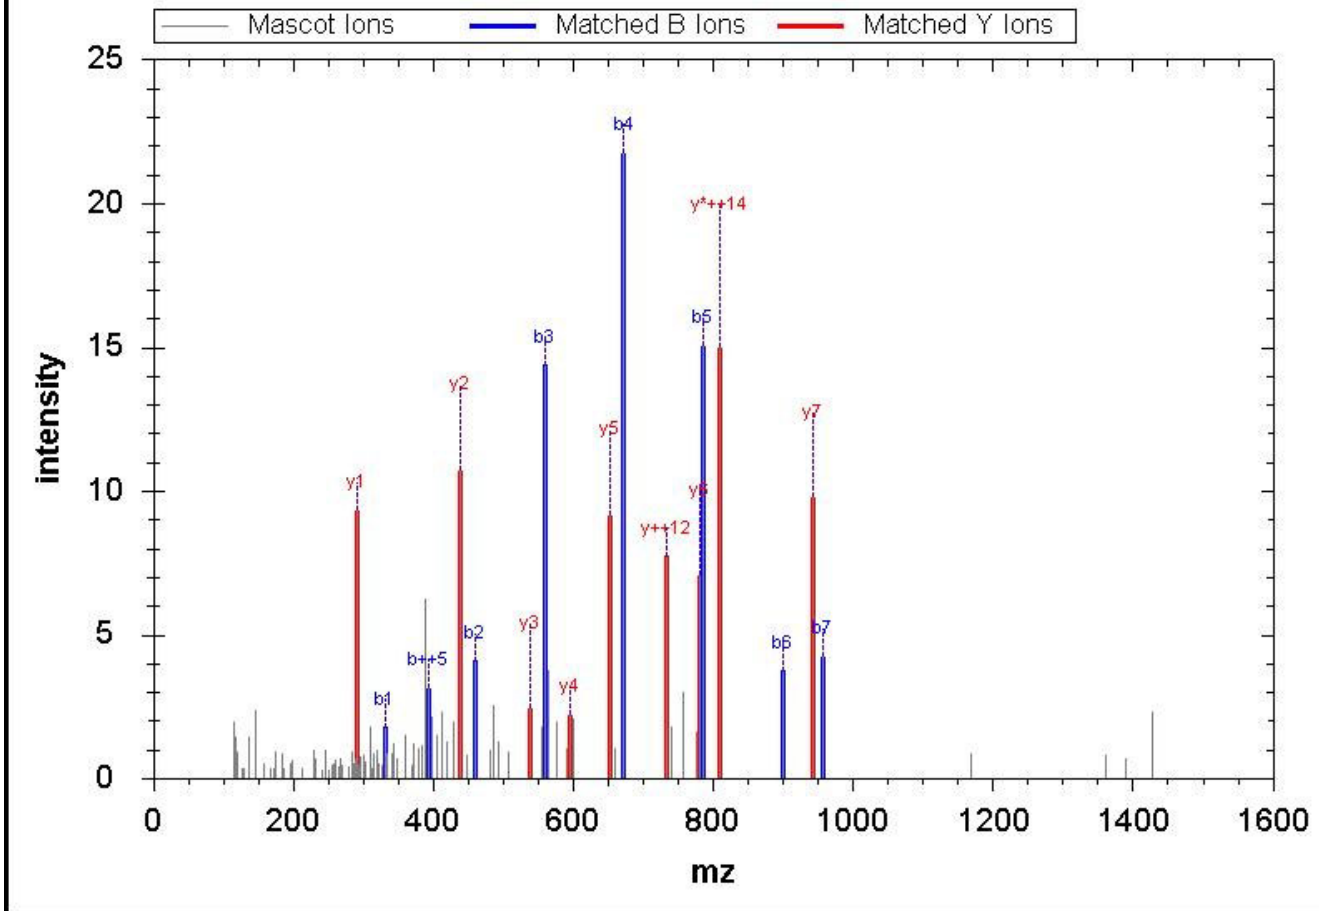

| No | b        | b++      | b0       | b0++     | Seq | y        | y++      | y*       | y*++     | y0       | y0++     | RevNo |
|----|----------|----------|----------|----------|-----|----------|----------|----------|----------|----------|----------|-------|
| 1  | 331.19   | 166.10   |          |          | W   |          |          |          |          |          |          | 19    |
| 2  | 460.23   | 230.62   | 442.22   | 221.61   | E   | 2,091.15 | 1,046.08 | 2,074.12 | 1,037.57 | 2,073.14 | 1,037.07 | 18    |
| 3  | 559.30   | 280.15   | 541.29   | 271.15   | V   | 1,962.11 | 981.56   | 1,945.08 | 973.04   | 1,944.10 | 972.55   | 17    |
| 4  | 672.38   | 336.70   | 654.37   | 327.69   | L   | 1,863.04 | 932.02   | 1,846.01 | 923.51   | 1,845.03 | 923.02   | 16    |
| 5  | 785.47   | 393.24   | 767.46   | 384.23   | I   | 1,749.95 | 875.48   | 1,732.93 | 866.97   | 1,731.94 | 866.48   | 15    |
| 6  | 898.55   | 449.78   | 880.54   | 440.77   | I   | 1,636.87 | 818.94   | 1,619.84 | 810.43   | 1,618.86 | 809.93   | 14    |
| 7  | 955.57   | 478.29   | 937.56   | 469.29   | G   | 1,523.79 | 762.40   | 1,506.76 | 753.88   | 1,505.78 | 753.39   | 13    |
| 8  | 1,052.63 | 526.82   | 1,034.62 | 517.81   | P   | 1,466.76 | 733.89   | 1,449.74 | 725.37   | 1,448.75 | 724.88   | 12    |
| 9  | 1,149.68 | 575.34   | 1,131.67 | 566.34   | P   | 1,369.71 | 685.36   | 1,352.69 | 676.85   | 1,351.70 | 676.35   | 11    |
| 10 | 1,264.71 | 632.86   | 1,246.70 | 623.85   | D   | 1,272.66 | 636.83   | 1,255.63 | 628.32   | 1,254.65 | 627.83   | 10    |
| 11 | 1,365.75 | 683.38   | 1,347.74 | 674.38   | T   | 1,157.63 | 579.32   | 1,140.61 | 570.81   | 1,139.62 | 570.31   | 9     |
| 12 | 1,478.84 | 739.92   | 1,460.83 | 730.92   | L   | 1,056.58 | 528.80   | 1,039.56 | 520.28   | 1,038.57 | 519.79   | 8     |
| 13 | 1,641.90 | 821.45   | 1,623.89 | 812.45   | Y   | 943.50   | 472.25   | 926.47   | 463.74   | 925.49   | 463.25   | 7     |
| 14 | 1,770.94 | 885.98   | 1,752.93 | 876.97   | E   | 780.44   | 390.72   | 763.41   | 382.21   | 762.43   | 381.72   | 6     |
| 15 | 1,827.97 | 914.49   | 1,809.95 | 905.48   | G   | 651.39   | 326.20   | 634.37   | 317.69   |          |          | 5     |
| 16 | 1,884.99 | 943.00   | 1,866.98 | 933.99   | G   | 594.37   | 297.69   | 577.35   | 289.18   |          |          | 4     |
| 17 | 1,984.05 | 992.53   | 1,966.04 | 983.53   | V   | 537.35   | 269.18   | 520.33   | 260.67   |          |          | 3     |
| 18 | 2,131.12 | 1,066.07 | 2,113.11 | 1,057.06 | F   | 438.28   | 219.65   | 421.26   | 211.13   |          |          | 2     |
| 19 |          |          |          |          | K   | 291.21   | 146.11   | 274.19   | 137.60   |          |          | 1     |

Query 78769 Hit 1

MS/MS Fragmentation of **GLAIPYLEHIIHVWEETGSR**

Found in **sp|Q96JC1|VPS39\_HUMAN**, Vam6/Vps39-like protein OS=Homo sapiens GN=VPS39 PE=1 SV=2

Match to Query 78769: 2463.3from(822.1072,3+)

Title: 1105: Sum of 2 scans in range 2644 (rt=68.1961, f=2, i=438) to 2645 (rt=68.2215, f=2, i=439)

[D:\lab212\membrane\GraceJoyce\iTRAQ\_46\_2.raw]

Data File: Submitted from 20120508-1(merge) by Mascot Daemon on JOYCE-VAIO

Monoisotopic mass of neutral peptide Mr(calc): 2463.3

Variable modifications:

Ions Score: 43.21 Expect: 0.041

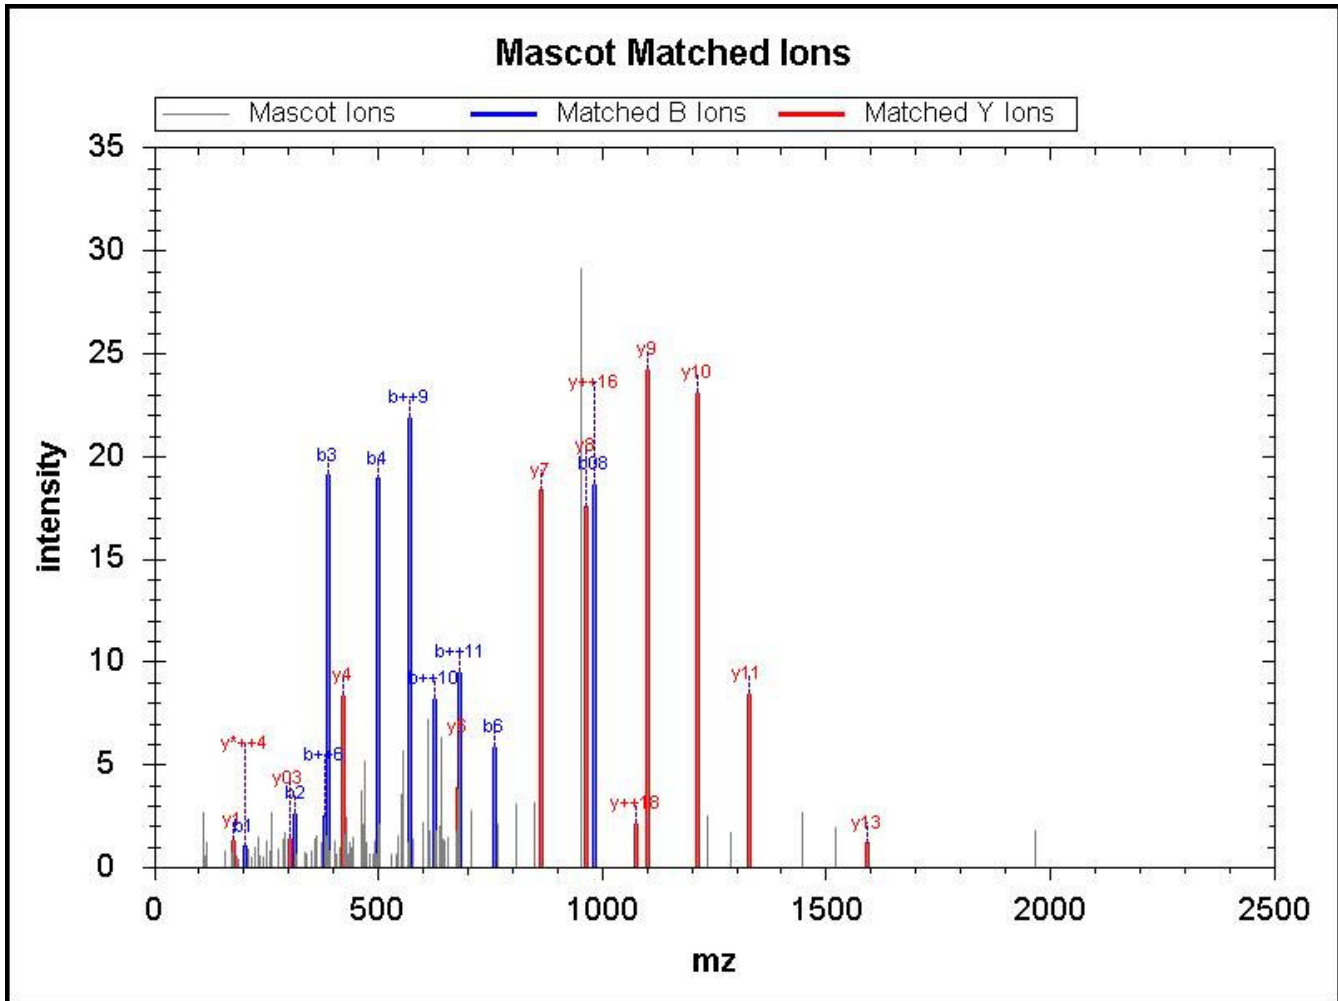

| No | b        | b++      | b0       | b0++     | Seq | y        | y++      | y*       | y*++     | y0       | y0++     | RevNo |
|----|----------|----------|----------|----------|-----|----------|----------|----------|----------|----------|----------|-------|
| 1  | 202.13   | 101.57   |          |          | G   |          |          |          |          |          |          | 20    |
| 2  | 315.21   | 158.11   |          |          | L   | 2,263.19 | 1,132.10 | 2,246.16 | 1,123.58 | 2,245.18 | 1,123.09 | 19    |
| 3  | 386.25   | 193.63   |          |          | A   | 2,150.10 | 1,075.56 | 2,133.08 | 1,067.04 | 2,132.09 | 1,066.55 | 18    |
| 4  | 499.34   | 250.17   |          |          | I   | 2,079.07 | 1,040.04 | 2,062.04 | 1,031.52 | 2,061.06 | 1,031.03 | 17    |
| 5  | 596.39   | 298.70   |          |          | P   | 1,965.98 | 983.49   | 1,948.96 | 974.98   | 1,947.97 | 974.49   | 16    |
| 6  | 759.45   | 380.23   |          |          | Y   | 1,868.93 | 934.97   | 1,851.90 | 926.46   | 1,850.92 | 925.96   | 15    |
| 7  | 872.54   | 436.77   |          |          | L   | 1,705.87 | 853.44   | 1,688.84 | 844.92   | 1,687.86 | 844.43   | 14    |
| 8  | 1,001.58 | 501.29   | 983.57   | 492.29   | E   | 1,592.78 | 796.89   | 1,575.76 | 788.38   | 1,574.77 | 787.89   | 13    |
| 9  | 1,138.64 | 569.82   | 1,120.63 | 560.82   | H   | 1,463.74 | 732.37   | 1,446.71 | 723.86   | 1,445.73 | 723.37   | 12    |
| 10 | 1,251.72 | 626.36   | 1,233.71 | 617.36   | I   | 1,326.68 | 663.84   | 1,309.65 | 655.33   | 1,308.67 | 654.84   | 11    |
| 11 | 1,364.81 | 682.91   | 1,346.80 | 673.90   | I   | 1,213.60 | 607.30   | 1,196.57 | 598.79   | 1,195.59 | 598.30   | 10    |
| 12 | 1,501.86 | 751.44   | 1,483.85 | 742.43   | H   | 1,100.51 | 550.76   | 1,083.49 | 542.25   | 1,082.50 | 541.75   | 9     |
| 13 | 1,600.93 | 800.97   | 1,582.92 | 791.96   | V   | 963.45   | 482.23   | 946.43   | 473.72   | 945.44   | 473.22   | 8     |
| 14 | 1,787.01 | 894.01   | 1,769.00 | 885.00   | W   | 864.38   | 432.70   | 847.36   | 424.18   | 846.37   | 423.69   | 7     |
| 15 | 1,916.06 | 958.53   | 1,898.04 | 949.53   | E   | 678.31   | 339.66   | 661.28   | 331.14   | 660.29   | 330.65   | 6     |
| 16 | 2,045.10 | 1,023.05 | 2,027.09 | 1,014.05 | E   | 549.26   | 275.13   | 532.24   | 266.62   | 531.25   | 266.13   | 5     |
| 17 | 2,146.15 | 1,073.58 | 2,128.14 | 1,064.57 | T   | 420.22   | 210.61   | 403.19   | 202.10   | 402.21   | 201.61   | 4     |
| 18 | 2,203.17 | 1,102.09 | 2,185.16 | 1,093.08 | G   | 319.17   | 160.09   | 302.15   | 151.58   | 301.16   | 151.08   | 3     |

|    |          |          |          |          |   |        |        |        |        |        |        |   |
|----|----------|----------|----------|----------|---|--------|--------|--------|--------|--------|--------|---|
| 19 | 2,290.20 | 1,145.60 | 2,272.19 | 1,136.60 | S | 262.15 | 131.58 | 245.12 | 123.07 | 244.14 | 122.57 | 2 |
| 20 |          |          |          |          | R | 175.12 | 88.06  | 158.09 | 79.55  |        |        | 1 |

Query 37217 Hit 1

MS/MS Fragmentation of **DLGQPAAAAGHFQR**

Found in **sp|P23610|F812\_HUMAN**, Factor VIII intron 22 protein OS=Homo sapiens GN=F8A1 PE=1 SV=2

Match to Query 37217: 1581.809from(528.277,3+)

Title: 267: Scan 666 (rt=24.4496, f=3, i=97) [D:\lab212\membrane\GraceJoyce\iTRAQ\_37\_2.raw]

Data File: Submitted from 20120508-1(merge) by Mascot Daemon on JOYCE-VAIO

Monoisotopic mass of neutral peptide Mr(calc): 1581.809

Variable modifications:

Ions Score: 43.18 Expect: 0.040

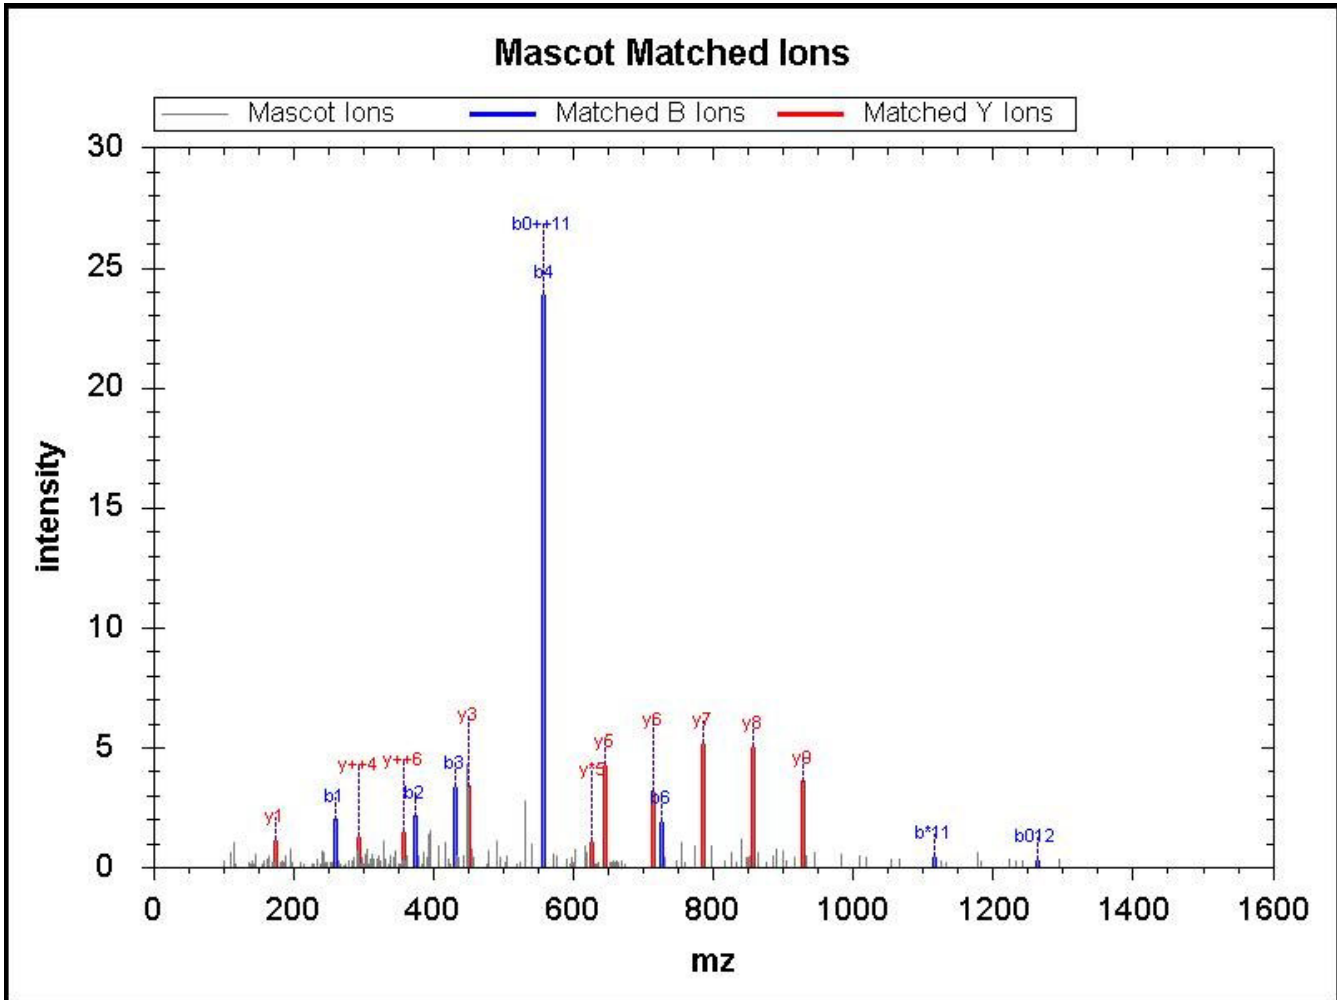

| No | b        | b++    | b*       | b*++   | b0       | b0++   | Seq | y        | y++    | y*       | y*++   | RevNo |
|----|----------|--------|----------|--------|----------|--------|-----|----------|--------|----------|--------|-------|
| 1  | 260.14   | 130.57 |          |        | 242.13   | 121.57 | D   |          |        |          |        | 14    |
| 2  | 373.22   | 187.11 |          |        | 355.21   | 178.11 | L   | 1,323.69 | 662.35 | 1,306.67 | 653.84 | 13    |
| 3  | 430.24   | 215.62 |          |        | 412.23   | 206.62 | G   | 1,210.61 | 605.81 | 1,193.58 | 597.29 | 12    |
| 4  | 558.30   | 279.65 | 541.27   | 271.14 | 540.29   | 270.65 | Q   | 1,153.59 | 577.30 | 1,136.56 | 568.78 | 11    |
| 5  | 655.35   | 328.18 | 638.33   | 319.67 | 637.34   | 319.17 | P   | 1,025.53 | 513.27 | 1,008.50 | 504.75 | 10    |
| 6  | 726.39   | 363.70 | 709.36   | 355.19 | 708.38   | 354.69 | A   | 928.47   | 464.74 | 911.45   | 456.23 | 9     |
| 7  | 797.43   | 399.22 | 780.40   | 390.70 | 779.42   | 390.21 | A   | 857.44   | 429.22 | 840.41   | 420.71 | 8     |
| 8  | 868.46   | 434.74 | 851.44   | 426.22 | 850.45   | 425.73 | A   | 786.40   | 393.70 | 769.37   | 385.19 | 7     |
| 9  | 939.50   | 470.25 | 922.47   | 461.74 | 921.49   | 461.25 | A   | 715.36   | 358.19 | 698.34   | 349.67 | 6     |
| 10 | 996.52   | 498.77 | 979.50   | 490.25 | 978.51   | 489.76 | G   | 644.33   | 322.67 | 627.30   | 314.15 | 5     |
| 11 | 1,133.58 | 567.29 | 1,116.56 | 558.78 | 1,115.57 | 558.29 | H   | 587.30   | 294.16 | 570.28   | 285.64 | 4     |
| 12 | 1,280.65 | 640.83 | 1,263.62 | 632.32 | 1,262.64 | 631.82 | F   | 450.25   | 225.63 | 433.22   | 217.11 | 3     |
| 13 | 1,408.71 | 704.86 | 1,391.68 | 696.34 | 1,390.70 | 695.85 | Q   | 303.18   | 152.09 | 286.15   | 143.58 | 2     |

|    |  |  |  |  |  |   |        |       |        |       |   |
|----|--|--|--|--|--|---|--------|-------|--------|-------|---|
| 14 |  |  |  |  |  | R | 175.12 | 88.06 | 158.09 | 79.55 | 1 |
|----|--|--|--|--|--|---|--------|-------|--------|-------|---|

Query 54392 Hit 1

MS/MS Fragmentation of **ILALLDALSTVHSQK**

Found in **sp|Q14692|BMS1\_HUMAN**, Ribosome biogenesis protein BMS1 homolog OS=Homo sapiens GN=BMS1 PE=1 SV=1  
 Match to Query 54392: 1896.125from(633.0489,3+)

Title: 1066: Scan 2331 (rt=61.958, f=2, i=365) [D:\lab212\membrane\Grace\Joyce\iTRAQ\_37\_2.raw]

Data File:Submitted from 20120508-1(merge) by Mascot Daemon on JOYCE-VAIO

Monoisotopic mass of neutral peptide Mr(calc): 1896.125

Variable modifications:

K15 iTRAQ4plex (K)

Ions Score: 43.16 Expect: 0.016

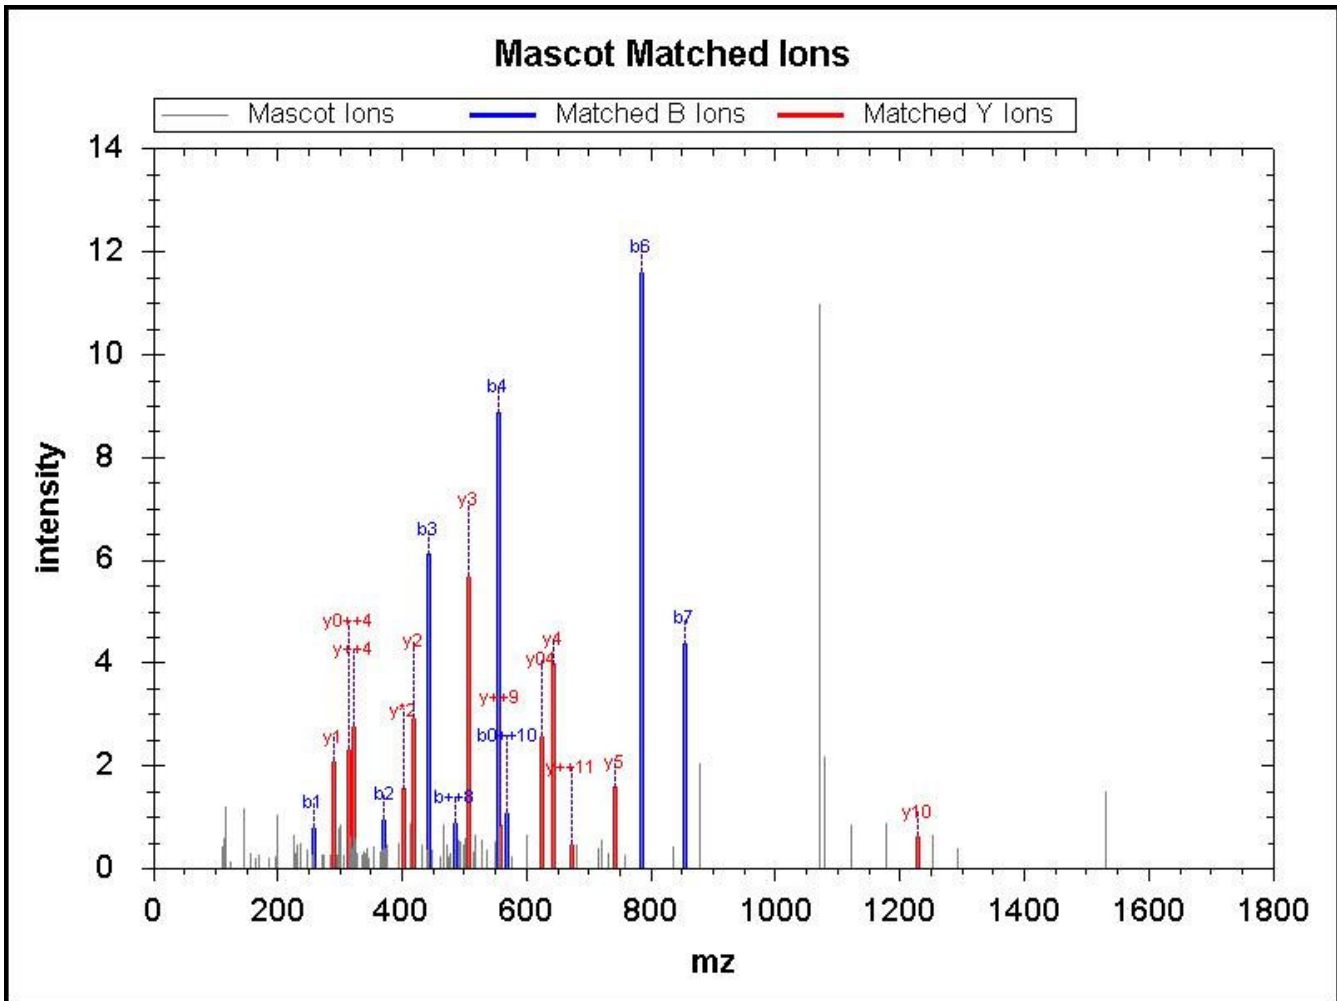



|    |          |        |          |        |          |        |   |        |        |        |        |  |  |   |
|----|----------|--------|----------|--------|----------|--------|---|--------|--------|--------|--------|--|--|---|
| 14 | 1,606.93 | 803.97 | 1,589.90 | 795.45 | 1,588.92 | 794.96 | Q | 419.27 | 210.14 | 402.25 | 201.63 |  |  | 2 |
| 15 |          |        |          |        |          |        | K | 291.21 | 146.11 | 274.19 | 137.60 |  |  | 1 |

Query 22783 Hit 1

MS/MS Fragmentation of **EVYEEAGVK**

Found in **sp|Q8NFP7|NUD10\_HUMAN**, Diphosphoinositol polyphosphate phosphohydrolase 3-alpha OS=Homo sapiens GN=NUDT10 PE=1 SV=1

Match to Query 22783: 1310.698from(656.3563,2+)

Title: 23: Sum of 2 scans in range 752 (rt=23.2104, f=3, i=8) to 753 (rt=23.2358, f=3, i=9)

[D:\lab212\membrane\GraceJoyce\iTRAQ\_29\_2.raw]

Data File:Submitted from 20120508-1(merge) by Mascot Daemon on JOYCE-VAIO

Monoisotopic mass of neutral peptide Mr(calc): 1310.698

Variable modifications:

K9 iTRAQ4plex (K)

Ions Score: 43.11 Expect: 0.036

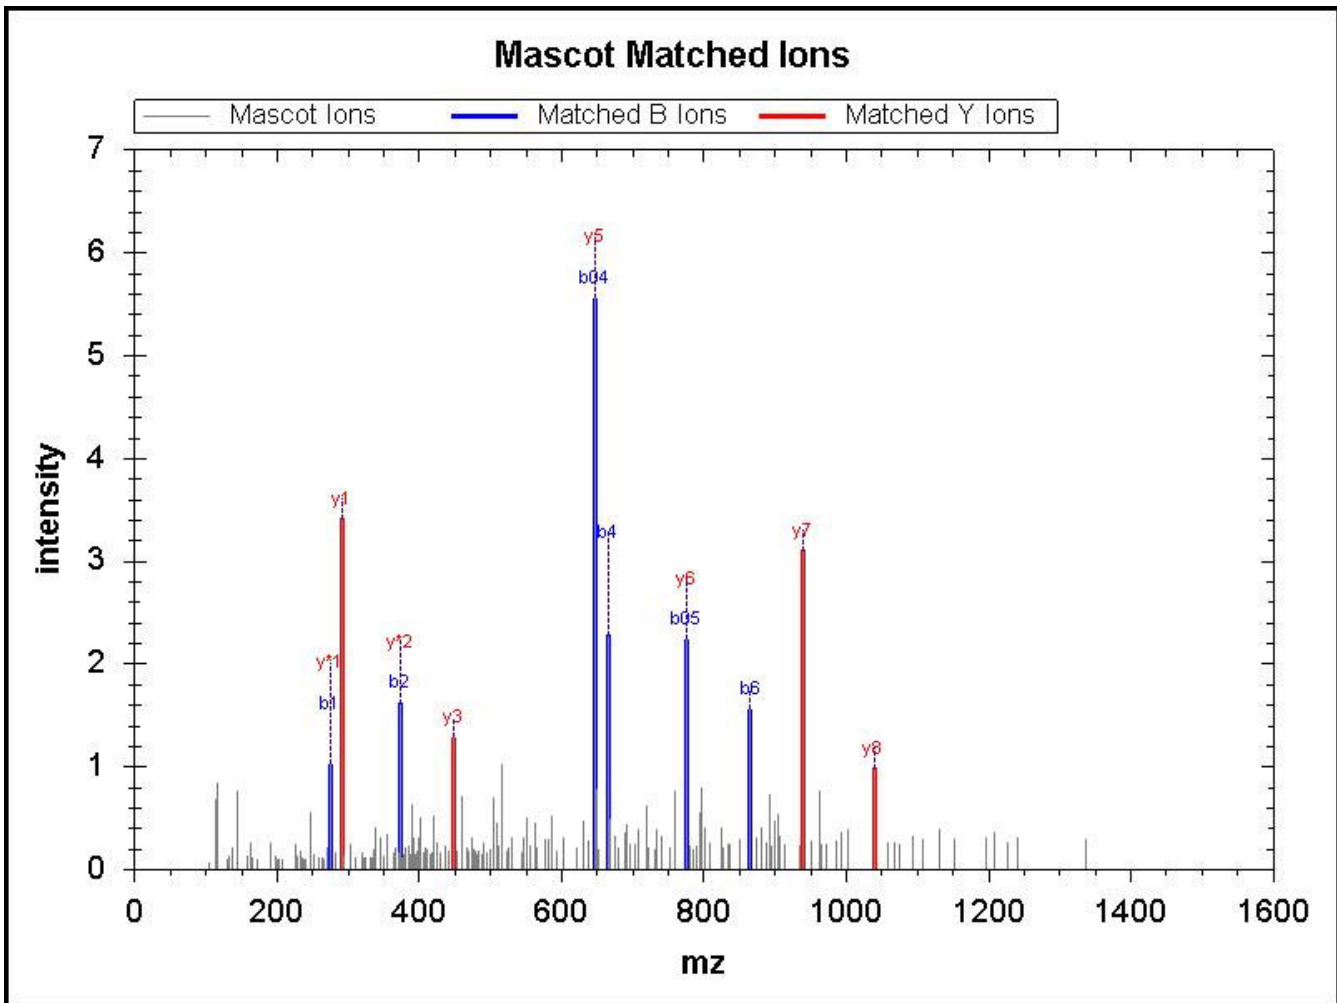

| No | b        | b++    | b0       | b0++   | Seq | y        | y++    | y*       | y*++   | y0       | y0++   | RevNo |
|----|----------|--------|----------|--------|-----|----------|--------|----------|--------|----------|--------|-------|
| 1  | 274.15   | 137.58 | 256.14   | 128.57 | E   |          |        |          |        |          |        | 9     |
| 2  | 373.22   | 187.11 | 355.21   | 178.11 | V   | 1,038.56 | 519.78 | 1,021.53 | 511.27 | 1,020.55 | 510.78 | 8     |
| 3  | 536.28   | 268.65 | 518.27   | 259.64 | Y   | 939.49   | 470.25 | 922.46   | 461.74 | 921.48   | 461.24 | 7     |
| 4  | 665.33   | 333.17 | 647.32   | 324.16 | E   | 776.43   | 388.72 | 759.40   | 380.20 | 758.42   | 379.71 | 6     |
| 5  | 794.37   | 397.69 | 776.36   | 388.68 | E   | 647.38   | 324.20 | 630.36   | 315.68 | 629.37   | 315.19 | 5     |
| 6  | 865.41   | 433.21 | 847.40   | 424.20 | A   | 518.34   | 259.67 | 501.32   | 251.16 |          |        | 4     |
| 7  | 922.43   | 461.72 | 904.42   | 452.71 | G   | 447.30   | 224.16 | 430.28   | 215.64 |          |        | 3     |
| 8  | 1,021.50 | 511.25 | 1,003.49 | 502.25 | V   | 390.28   | 195.65 | 373.26   | 187.13 |          |        | 2     |
| 9  |          |        |          |        | K   | 291.21   | 146.11 | 274.19   | 137.60 |          |        | 1     |

Query 6670 Hit 1

MS/MS Fragmentation of **LIELAK**

Found in **sp|P41218|MNDA\_HUMAN**, Myeloid cell nuclear differentiation antigen OS=Homo sapiens GN=MNDA PE=1 SV=1

Match to Query 6670: 973.6475 from (487.831, 2+)

Title: 445: Scan 1050 (rt=33.0145, f=3, i=153) [D:\lab212\membrane\Grace\Joyce\iTRAQ\_31\_1.raw]

Data File: Submitted from 20120508-1 (merge) by Mascot Daemon on JOYCE-VAIO

Monoisotopic mass of neutral peptide Mr(calc): 973.6475

Variable modifications:

K6 iTRAQ4plex (K)

Ions Score: 43.1 Expect: 0.022

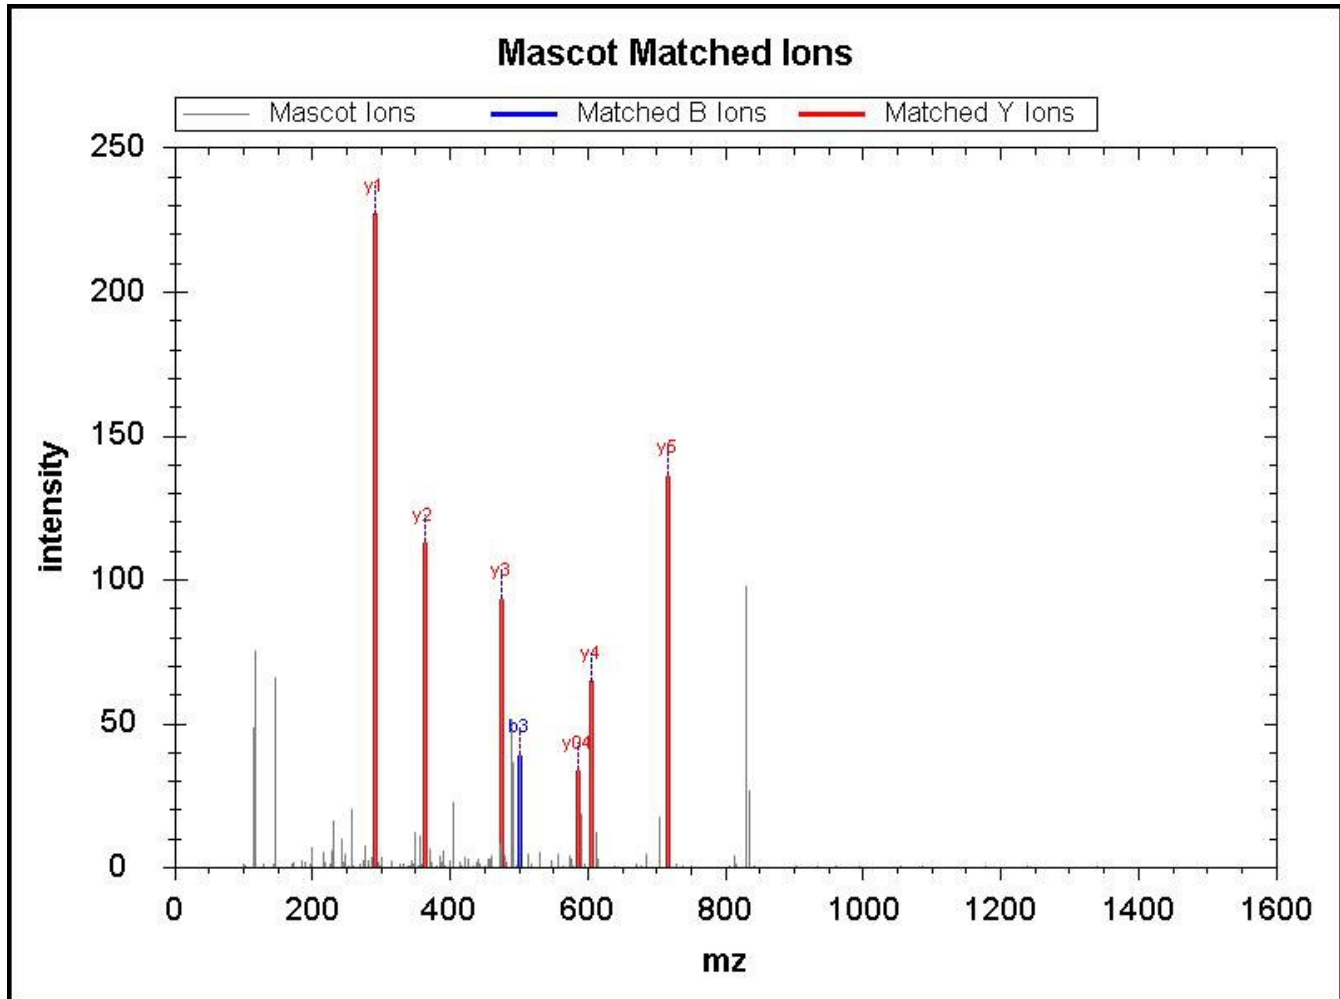

| No | b      | b++    | b0     | b0++   | Seq | y      | y++    | y*     | y*++   | y0     | y0++   | RevNo |
|----|--------|--------|--------|--------|-----|--------|--------|--------|--------|--------|--------|-------|
| 1  | 258.19 | 129.60 |        |        | L   |        |        |        |        |        |        | 6     |
| 2  | 371.28 | 186.14 |        |        | I   | 717.46 | 359.23 | 700.44 | 350.72 | 699.45 | 350.23 | 5     |
| 3  | 500.32 | 250.66 | 482.31 | 241.66 | E   | 604.38 | 302.69 | 587.35 | 294.18 | 586.37 | 293.69 | 4     |
| 4  | 613.40 | 307.21 | 595.39 | 298.20 | L   | 475.34 | 238.17 | 458.31 | 229.66 |        |        | 3     |
| 5  | 684.44 | 342.72 | 666.43 | 333.72 | A   | 362.25 | 181.63 | 345.23 | 173.12 |        |        | 2     |
| 6  |        |        |        |        | K   | 291.21 | 146.11 | 274.19 | 137.60 |        |        | 1     |

Query 25466 Hit 1

MS/MS Fragmentation of **DSVLTWLLK**

Found in **sp|Q9H1H9|KIF13A\_HUMAN**, Kinesin-like protein KIF13A OS=Homo sapiens GN=KIF13A PE=1 SV=2

Match to Query 25466: 1361.819 from (681.9171, 2+)

Title: 823: Sum of 2 scans in range 2419 (rt=60.7785, f=4, i=539) to 2420 (rt=60.8039, f=4, i=540)

[D:\lab212\membrane\Grace\Joyce\iTRAQ\_29\_2.raw]

Data File: Submitted from 20120508-1 (merge) by Mascot Daemon on JOYCE-VAIO

Monoisotopic mass of neutral peptide Mr(calc): 1361.819

Variable modifications:

K9 iTRAQ4plex (K)

Ions Score: 43.05 Expect: 0.030

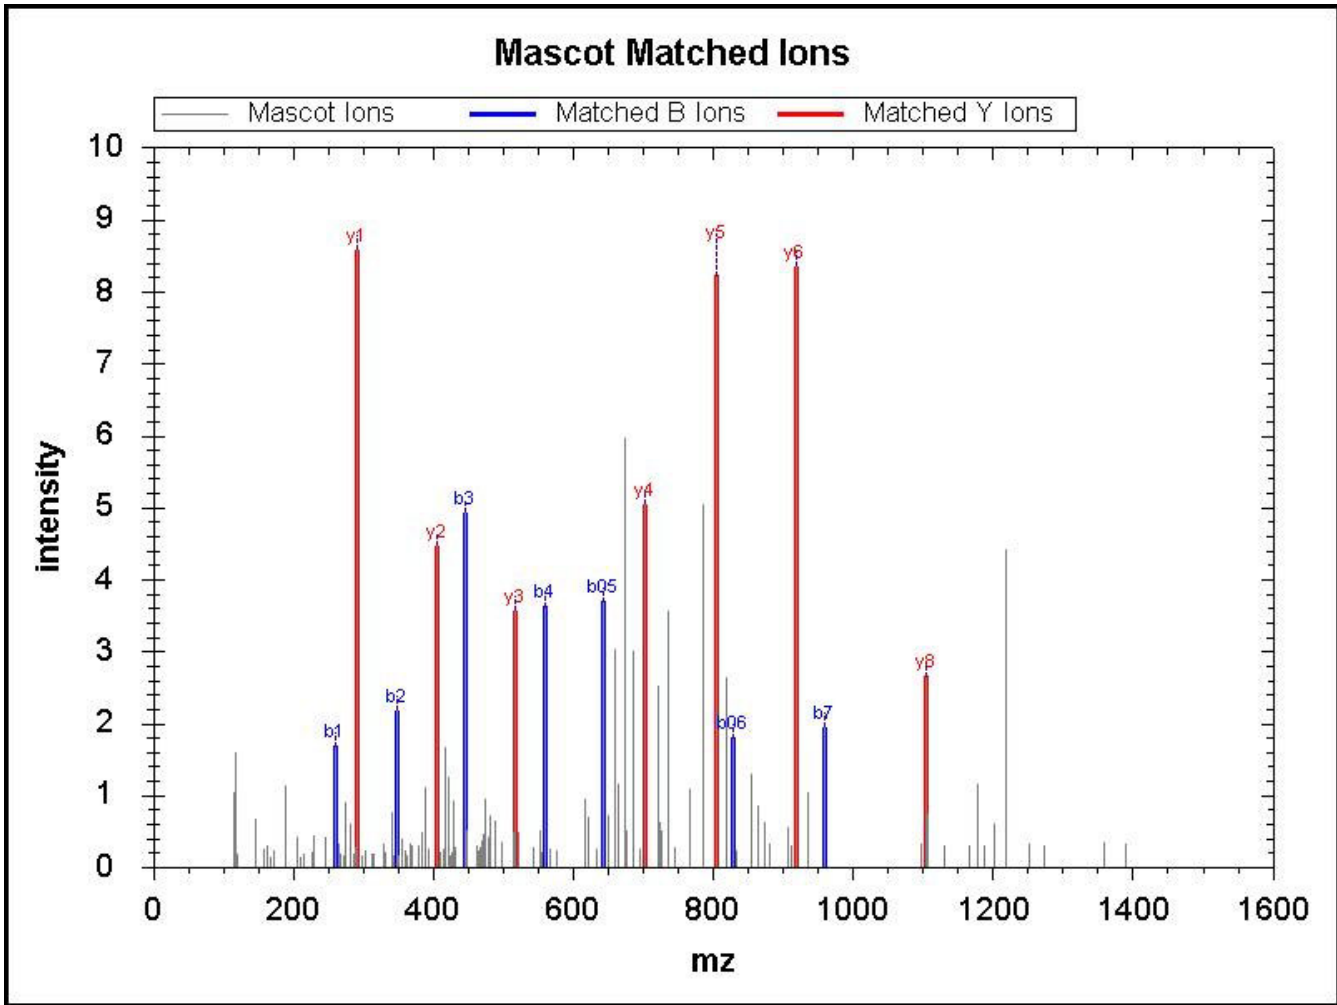

| No | b        | b++    | b0       | b0++   | Seq | y        | y++    | y*       | y*++   | y0       | y0++   | RevNo |
|----|----------|--------|----------|--------|-----|----------|--------|----------|--------|----------|--------|-------|
| 1  | 260.14   | 130.57 | 242.13   | 121.57 | D   |          |        |          |        |          |        | 9     |
| 2  | 347.17   | 174.09 | 329.16   | 165.08 | S   | 1,103.69 | 552.35 | 1,086.67 | 543.84 | 1,085.68 | 543.35 | 8     |
| 3  | 446.24   | 223.62 | 428.23   | 214.62 | V   | 1,016.66 | 508.83 | 999.64   | 500.32 | 998.65   | 499.83 | 7     |
| 4  | 559.32   | 280.16 | 541.31   | 271.16 | L   | 917.59   | 459.30 | 900.57   | 450.79 | 899.58   | 450.30 | 6     |
| 5  | 660.37   | 330.69 | 642.36   | 321.68 | T   | 804.51   | 402.76 | 787.48   | 394.25 | 786.50   | 393.75 | 5     |
| 6  | 846.45   | 423.73 | 828.44   | 414.72 | W   | 703.46   | 352.23 | 686.44   | 343.72 |          |        | 4     |
| 7  | 959.53   | 480.27 | 941.52   | 471.26 | L   | 517.38   | 259.20 | 500.36   | 250.68 |          |        | 3     |
| 8  | 1,072.62 | 536.81 | 1,054.61 | 527.81 | L   | 404.30   | 202.65 | 387.27   | 194.14 |          |        | 2     |
| 9  |          |        |          |        | K   | 291.21   | 146.11 | 274.19   | 137.60 |          |        | 1     |

Query 87694 Hit 1

MS/MS Fragmentation of **EKEELIEEWQPEPLVPPVPK**  
 Found in **sp|O15269|SPTC1\_HUMAN**, Serine palmitoyltransferase 1 OS=Homo sapiens GN=SPTLC1 PE=1 SV=1  
 Match to Query 87694: 2817.554 from (940.1921,3+)  
 Title: 810: Sum of 2 scans in range 1809 (rt=50.2603, f=4, i=541) to 1810 (rt=50.2858, f=4, i=542)  
 [D:\lab212\membrane\GraceJoyce\iTRAQ\_39\_1.raw]  
 Data File: Submitted from 20120508-1(merge) by Mascot Daemon on JOYCE-VAIO  
 Monoisotopic mass of neutral peptide Mr(calc): 2817.554  
 Variable modifications:  
 K2 iTRAQ4plex (K)  
 K20 iTRAQ4plex (K)  
 Ions Score: 43.05 Expect: 0.023

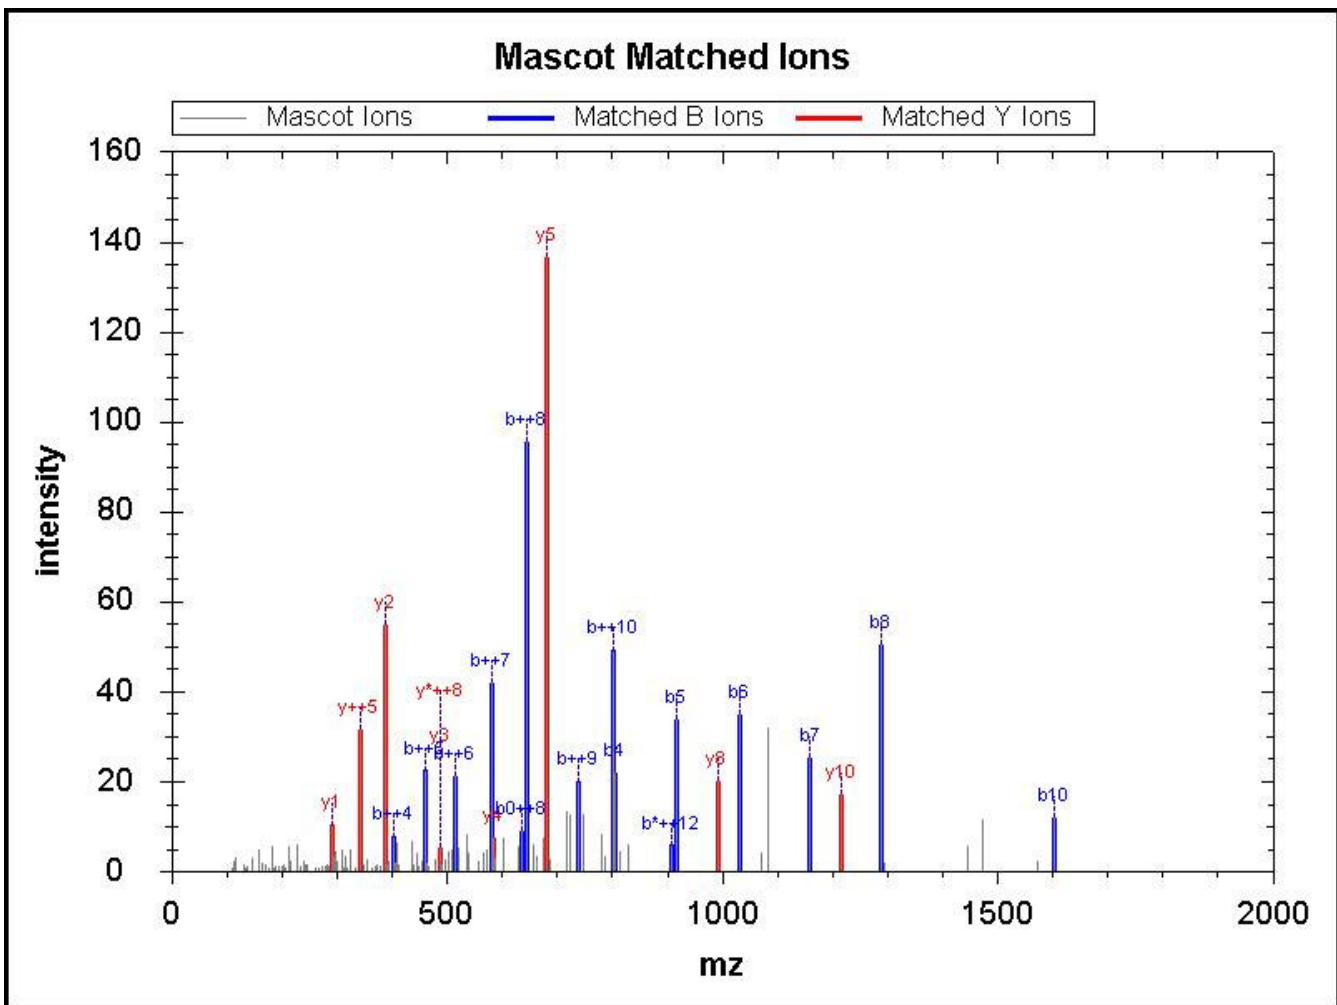

| No | b        | b++      | b*       | b*++     | b0       | b0++     | Seq | y        | y++      | y*       | y*++     | y0       | y0++     | RevNo |
|----|----------|----------|----------|----------|----------|----------|-----|----------|----------|----------|----------|----------|----------|-------|
| 1  | 274.15   | 137.58   |          |          | 256.14   | 128.57   | E   |          |          |          |          |          |          | 20    |
| 2  | 546.35   | 273.68   | 529.32   | 265.16   | 528.34   | 264.67   | K   | 2,545.42 | 1,273.21 | 2,528.39 | 1,264.70 | 2,527.41 | 1,264.21 | 19    |
| 3  | 675.39   | 338.20   | 658.36   | 329.69   | 657.38   | 329.19   | E   | 2,273.22 | 1,137.11 | 2,256.19 | 1,128.60 | 2,255.21 | 1,128.11 | 18    |
| 4  | 804.43   | 402.72   | 787.41   | 394.21   | 786.42   | 393.72   | E   | 2,144.18 | 1,072.59 | 2,127.15 | 1,064.08 | 2,126.17 | 1,063.59 | 17    |
| 5  | 917.52   | 459.26   | 900.49   | 450.75   | 899.51   | 450.26   | L   | 2,015.13 | 1,008.07 | 1,998.11 | 999.56   | 1,997.12 | 999.07   | 16    |
| 6  | 1,030.60 | 515.80   | 1,013.58 | 507.29   | 1,012.59 | 506.80   | I   | 1,902.05 | 951.53   | 1,885.02 | 943.02   | 1,884.04 | 942.52   | 15    |
| 7  | 1,159.64 | 580.33   | 1,142.62 | 571.81   | 1,141.63 | 571.32   | E   | 1,788.97 | 894.99   | 1,771.94 | 886.47   | 1,770.95 | 885.98   | 14    |
| 8  | 1,288.69 | 644.85   | 1,271.66 | 636.33   | 1,270.68 | 635.84   | E   | 1,659.92 | 830.46   | 1,642.90 | 821.95   | 1,641.91 | 821.46   | 13    |
| 9  | 1,474.77 | 737.89   | 1,457.74 | 729.37   | 1,456.76 | 728.88   | W   | 1,530.88 | 765.94   | 1,513.85 | 757.43   | 1,512.87 | 756.94   | 12    |
| 10 | 1,602.83 | 801.92   | 1,585.80 | 793.40   | 1,584.81 | 792.91   | Q   | 1,344.80 | 672.90   | 1,327.77 | 664.39   | 1,326.79 | 663.90   | 11    |
| 11 | 1,699.88 | 850.44   | 1,682.85 | 841.93   | 1,681.87 | 841.44   | P   | 1,216.74 | 608.87   | 1,199.72 | 600.36   | 1,198.73 | 599.87   | 10    |
| 12 | 1,828.92 | 914.96   | 1,811.89 | 906.45   | 1,810.91 | 905.96   | E   | 1,119.69 | 560.35   | 1,102.66 | 551.84   | 1,101.68 | 551.34   | 9     |
| 13 | 1,925.97 | 963.49   | 1,908.95 | 954.98   | 1,907.96 | 954.49   | P   | 990.65   | 495.83   | 973.62   | 487.31   |          |          | 8     |
| 14 | 2,039.06 | 1,020.03 | 2,022.03 | 1,011.52 | 2,021.05 | 1,011.03 | L   | 893.59   | 447.30   | 876.57   | 438.79   |          |          | 7     |
| 15 | 2,138.13 | 1,069.57 | 2,121.10 | 1,061.05 | 2,120.12 | 1,060.56 | V   | 780.51   | 390.76   | 763.48   | 382.25   |          |          | 6     |
| 16 | 2,235.18 | 1,118.09 | 2,218.15 | 1,109.58 | 2,217.17 | 1,109.09 | P   | 681.44   | 341.22   | 664.41   | 332.71   |          |          | 5     |
| 17 | 2,332.23 | 1,166.62 | 2,315.20 | 1,158.11 | 2,314.22 | 1,157.61 | P   | 584.39   | 292.70   | 567.36   | 284.18   |          |          | 4     |
| 18 | 2,431.30 | 1,216.15 | 2,414.27 | 1,207.64 | 2,413.29 | 1,207.15 | V   | 487.34   | 244.17   | 470.31   | 235.66   |          |          | 3     |
| 19 | 2,528.35 | 1,264.68 | 2,511.33 | 1,256.17 | 2,510.34 | 1,255.67 | P   | 388.27   | 194.64   | 371.24   | 186.12   |          |          | 2     |
| 20 |          |          |          |          |          |          | K   | 291.21   | 146.11   | 274.19   | 137.60   |          |          | 1     |

Query 61360 Hit 1

MS/MS Fragmentation of **ETDLQELFRPFGSISR**

Found in **sp|O75821|EIF3G\_HUMAN**, Eukaryotic translation initiation factor 3 subunit G OS=Homo sapiens GN=EIF3G PE=1 SV=2



MS/MS Fragmentation of **NVELTEVGPR**

Found in **sp|Q96G21|IMP4\_HUMAN**, U3 small nucleolar ribonucleoprotein protein IMP4 OS=Homo sapiens GN=IMP4 PE=1 SV=1

Match to Query 19893: 1256.686from(629.3502,2+)

Title: 187: Scan 980 (rt=29.1326, f=3, i=65) [D:\lab212\membrane\Grace\Joyce\iTRAQ\_22\_2.raw]

Data File:Submitted from 20120508-1(merge) by Mascot Daemon on JOYCE-VAIO

Monoisotopic mass of neutral peptide Mr(calc): 1256.686

Variable modifications:

Ions Score: 43 Expect: 0.033

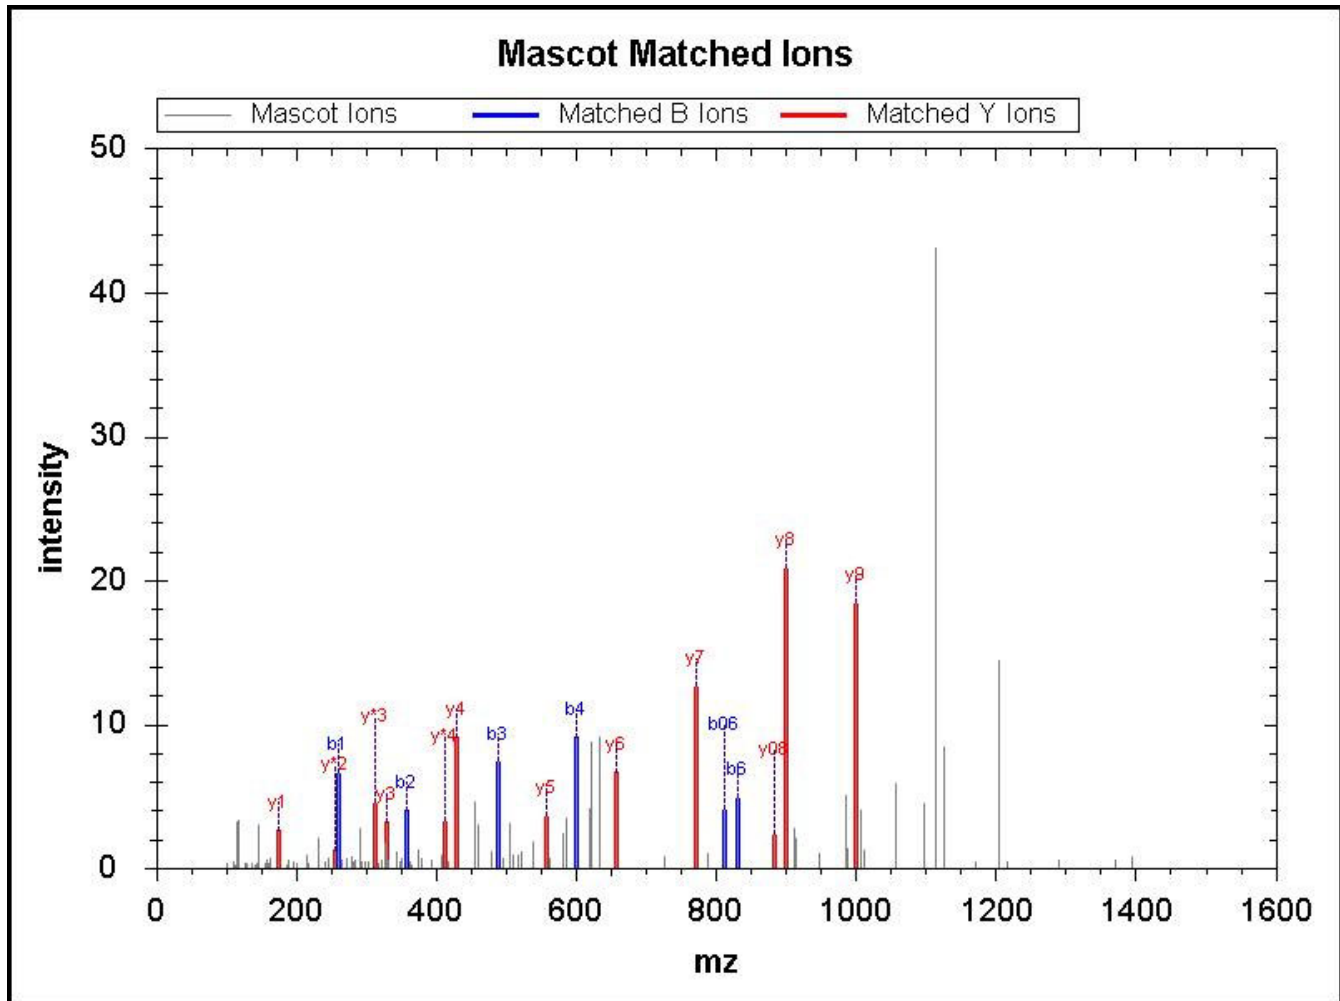

| No | b        | b++    | b*       | b*++   | b0       | b0++   | Seq | y      | y++    | y*     | y*++   | y0     | y0++   | RevNo |
|----|----------|--------|----------|--------|----------|--------|-----|--------|--------|--------|--------|--------|--------|-------|
| 1  | 259.15   | 130.08 | 242.13   | 121.57 |          |        | N   |        |        |        |        |        |        | 10    |
| 2  | 358.22   | 179.61 | 341.19   | 171.10 |          |        | V   | 999.55 | 500.28 | 982.52 | 491.76 | 981.54 | 491.27 | 9     |
| 3  | 487.26   | 244.14 | 470.24   | 235.62 | 469.25   | 235.13 | E   | 900.48 | 450.74 | 883.45 | 442.23 | 882.47 | 441.74 | 8     |
| 4  | 600.35   | 300.68 | 583.32   | 292.16 | 582.34   | 291.67 | L   | 771.44 | 386.22 | 754.41 | 377.71 | 753.43 | 377.22 | 7     |
| 5  | 701.39   | 351.20 | 684.37   | 342.69 | 683.38   | 342.20 | T   | 658.35 | 329.68 | 641.33 | 321.17 | 640.34 | 320.67 | 6     |
| 6  | 830.44   | 415.72 | 813.41   | 407.21 | 812.43   | 406.72 | E   | 557.30 | 279.16 | 540.28 | 270.64 | 539.29 | 270.15 | 5     |
| 7  | 929.51   | 465.26 | 912.48   | 456.74 | 911.50   | 456.25 | V   | 428.26 | 214.63 | 411.24 | 206.12 |        |        | 4     |
| 8  | 986.53   | 493.77 | 969.50   | 485.25 | 968.52   | 484.76 | G   | 329.19 | 165.10 | 312.17 | 156.59 |        |        | 3     |
| 9  | 1,083.58 | 542.29 | 1,066.55 | 533.78 | 1,065.57 | 533.29 | P   | 272.17 | 136.59 | 255.15 | 128.08 |        |        | 2     |
| 10 |          |        |          |        |          |        | R   | 175.12 | 88.06  | 158.09 | 79.55  |        |        | 1     |

Query 21250 Hit 1

MS/MS Fragmentation of **SALGITVHQGR**

Found in **sp|Q14145|KEAP1\_HUMAN**, Kelch-like ECH-associated protein 1 OS=Homo sapiens GN=KEAP1 PE=1 SV=2

Match to Query 21250: 1281.723from(428.2484,3+)

Title: 277: Scan 656 (rt=24.4536, f=3, i=99) [D:\lab212\membrane\Grace\Joyce\iTRAQ\_40\_1.raw]

Data File:Submitted from 20120508-1(merge) by Mascot Daemon on JOYCE-VAIO

Monoisotopic mass of neutral peptide Mr(calc): 1281.723

Variable modifications:

Ions Score: 42.88 Expect: 0.033

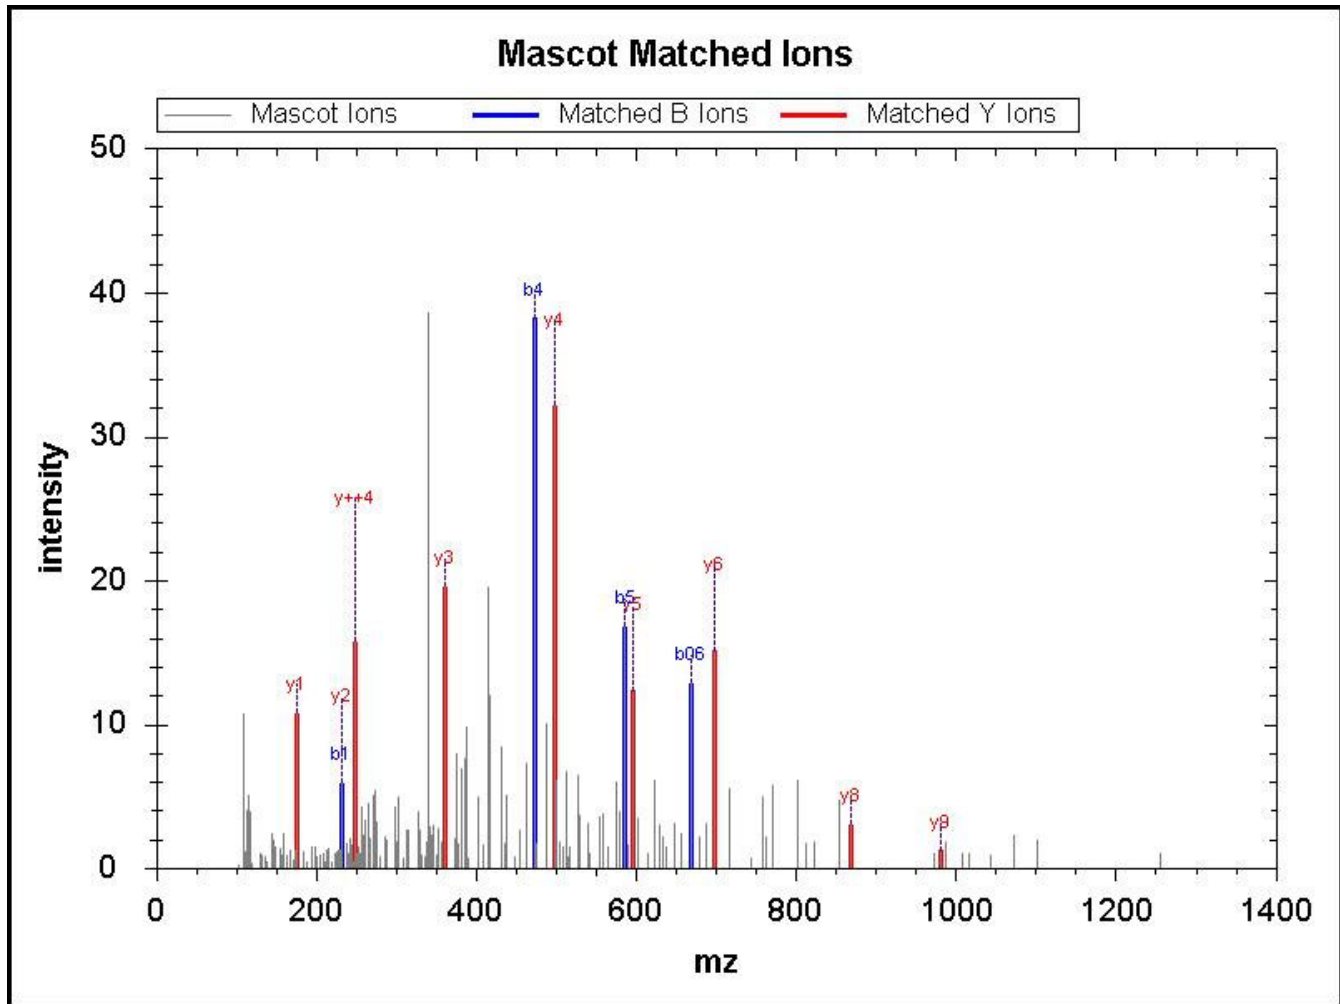

| No | b        | b++    | b*       | b*++   | b0       | b0++   | Seq | y        | y++    | y*       | y*++   | y0       | y0++   | RevNo |
|----|----------|--------|----------|--------|----------|--------|-----|----------|--------|----------|--------|----------|--------|-------|
| 1  | 232.14   | 116.57 |          |        | 214.13   | 107.57 | S   |          |        |          |        |          |        | 11    |
| 2  | 303.18   | 152.09 |          |        | 285.17   | 143.09 | A   | 1,051.60 | 526.30 | 1,034.57 | 517.79 | 1,033.59 | 517.30 | 10    |
| 3  | 416.26   | 208.63 |          |        | 398.25   | 199.63 | L   | 980.56   | 490.79 | 963.54   | 482.27 | 962.55   | 481.78 | 9     |
| 4  | 473.28   | 237.15 |          |        | 455.27   | 228.14 | G   | 867.48   | 434.24 | 850.45   | 425.73 | 849.47   | 425.24 | 8     |
| 5  | 586.37   | 293.69 |          |        | 568.36   | 284.68 | I   | 810.46   | 405.73 | 793.43   | 397.22 | 792.45   | 396.73 | 7     |
| 6  | 687.42   | 344.21 |          |        | 669.41   | 335.21 | T   | 697.37   | 349.19 | 680.35   | 340.68 | 679.36   | 340.19 | 6     |
| 7  | 786.48   | 393.75 |          |        | 768.47   | 384.74 | V   | 596.33   | 298.67 | 579.30   | 290.15 |          |        | 5     |
| 8  | 923.54   | 462.28 |          |        | 905.53   | 453.27 | H   | 497.26   | 249.13 | 480.23   | 240.62 |          |        | 4     |
| 9  | 1,051.60 | 526.30 | 1,034.58 | 517.79 | 1,033.59 | 517.30 | Q   | 360.20   | 180.60 | 343.17   | 172.09 |          |        | 3     |
| 10 | 1,108.62 | 554.82 | 1,091.60 | 546.30 | 1,090.61 | 545.81 | G   | 232.14   | 116.57 | 215.11   | 108.06 |          |        | 2     |
| 11 |          |        |          |        |          |        | R   | 175.12   | 88.06  | 158.09   | 79.55  |          |        | 1     |

Query 87751 Hit 1

MS/MS Fragmentation of **LVAVGGFSPNVNHGELLNAAIEALK**

Found in **sp|Q9NXV6|CARF\_HUMAN**, CDKN2A-interacting protein OS=Homo sapiens GN=CDKN2AIP PE=1 SV=3

Match to Query 87751: 2820.568from(706.1492,4+)

Title: 1008: Sum of 2 scans in range 2181 (rt=58.8092, f=4, i=677) to 2182 (rt=58.8346, f=4, i=678)

[D:\lab212\membrane\GraceJoyce\iTRAQ\_33\_2.raw]

Data File:Submitted from 20120508-1(merge) by Mascot Daemon on JOYCE-VAIO

Monoisotopic mass of neutral peptide Mr(calc): 2820.568

Variable modifications:

K25 :iTRAQ4plex (K)

Ions Score: 42.86 Expect: 0.021

### Mascot Matched Ions

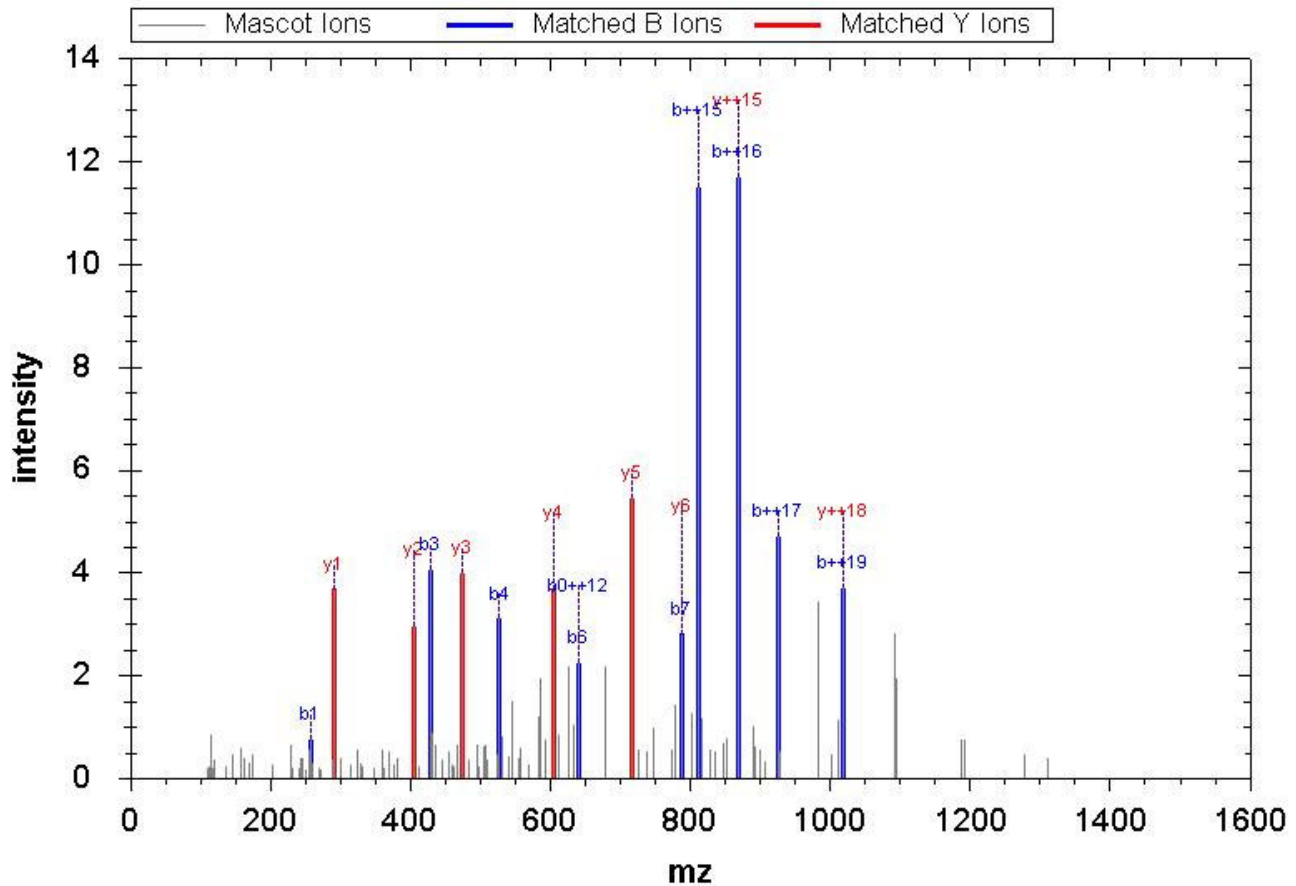

| No | b        | b++      | b*       | b*++     | b0       | b0++     | Seq | y        | y++      | y*       | y*++     | y0       | y0++     | RevNo |
|----|----------|----------|----------|----------|----------|----------|-----|----------|----------|----------|----------|----------|----------|-------|
| 1  | 258.19   | 129.60   |          |          |          |          | L   |          |          |          |          |          |          | 25    |
| 2  | 357.26   | 179.13   |          |          |          |          | V   | 2,564.40 | 1,282.70 | 2,547.37 | 1,274.19 | 2,546.38 | 1,273.70 | 24    |
| 3  | 428.30   | 214.65   |          |          |          |          | A   | 2,465.33 | 1,233.17 | 2,448.30 | 1,224.65 | 2,447.32 | 1,224.16 | 23    |
| 4  | 527.37   | 264.19   |          |          |          |          | V   | 2,394.29 | 1,197.65 | 2,377.26 | 1,189.14 | 2,376.28 | 1,188.64 | 22    |
| 5  | 584.39   | 292.70   |          |          |          |          | G   | 2,295.22 | 1,148.11 | 2,278.19 | 1,139.60 | 2,277.21 | 1,139.11 | 21    |
| 6  | 641.41   | 321.21   |          |          |          |          | G   | 2,238.20 | 1,119.60 | 2,221.17 | 1,111.09 | 2,220.19 | 1,110.60 | 20    |
| 7  | 788.48   | 394.74   |          |          |          |          | F   | 2,181.18 | 1,091.09 | 2,164.15 | 1,082.58 | 2,163.17 | 1,082.09 | 19    |
| 8  | 875.51   | 438.26   |          |          | 857.50   | 429.25   | S   | 2,034.11 | 1,017.56 | 2,017.08 | 1,009.05 | 2,016.10 | 1,008.55 | 18    |
| 9  | 972.56   | 486.79   |          |          | 954.55   | 477.78   | P   | 1,947.08 | 974.04   | 1,930.05 | 965.53   | 1,929.07 | 965.04   | 17    |
| 10 | 1,086.61 | 543.81   | 1,069.58 | 535.29   | 1,068.60 | 534.80   | N   | 1,850.03 | 925.52   | 1,833.00 | 917.00   | 1,832.01 | 916.51   | 16    |
| 11 | 1,185.67 | 593.34   | 1,168.65 | 584.83   | 1,167.66 | 584.34   | V   | 1,735.98 | 868.49   | 1,718.96 | 859.98   | 1,717.97 | 859.49   | 15    |
| 12 | 1,299.72 | 650.36   | 1,282.69 | 641.85   | 1,281.71 | 641.36   | N   | 1,636.91 | 818.96   | 1,619.89 | 810.45   | 1,618.90 | 809.96   | 14    |
| 13 | 1,436.78 | 718.89   | 1,419.75 | 710.38   | 1,418.77 | 709.89   | H   | 1,522.87 | 761.94   | 1,505.84 | 753.43   | 1,504.86 | 752.93   | 13    |
| 14 | 1,493.80 | 747.40   | 1,476.77 | 738.89   | 1,475.79 | 738.40   | G   | 1,385.81 | 693.41   | 1,368.79 | 684.90   | 1,367.80 | 684.40   | 12    |
| 15 | 1,622.84 | 811.92   | 1,605.81 | 803.41   | 1,604.83 | 802.92   | E   | 1,328.79 | 664.90   | 1,311.76 | 656.39   | 1,310.78 | 655.89   | 11    |
| 16 | 1,735.93 | 868.47   | 1,718.90 | 859.95   | 1,717.91 | 859.46   | L   | 1,199.75 | 600.38   | 1,182.72 | 591.86   | 1,181.74 | 591.37   | 10    |
| 17 | 1,849.01 | 925.01   | 1,831.98 | 916.49   | 1,831.00 | 916.00   | L   | 1,086.66 | 543.84   | 1,069.64 | 535.32   | 1,068.65 | 534.83   | 9     |
| 18 | 1,963.05 | 982.03   | 1,946.03 | 973.52   | 1,945.04 | 973.02   | N   | 973.58   | 487.29   | 956.55   | 478.78   | 955.57   | 478.29   | 8     |
| 19 | 2,034.09 | 1,017.55 | 2,017.06 | 1,009.04 | 2,016.08 | 1,008.54 | A   | 859.54   | 430.27   | 842.51   | 421.76   | 841.53   | 421.27   | 7     |
| 20 | 2,105.13 | 1,053.07 | 2,088.10 | 1,044.55 | 2,087.12 | 1,044.06 | A   | 788.50   | 394.75   | 771.47   | 386.24   | 770.49   | 385.75   | 6     |
| 21 | 2,218.21 | 1,109.61 | 2,201.18 | 1,101.10 | 2,200.20 | 1,100.60 | I   | 717.46   | 359.23   | 700.44   | 350.72   | 699.45   | 350.23   | 5     |
| 22 | 2,347.25 | 1,174.13 | 2,330.23 | 1,165.62 | 2,329.24 | 1,165.12 | E   | 604.38   | 302.69   | 587.35   | 294.18   | 586.37   | 293.69   | 4     |
| 23 | 2,418.29 | 1,209.65 | 2,401.26 | 1,201.14 | 2,400.28 | 1,200.64 | A   | 475.34   | 238.17   | 458.31   | 229.66   |          |          | 3     |



|    |          |          |          |          |          |          |   |        |        |        |        |  |  |   |
|----|----------|----------|----------|----------|----------|----------|---|--------|--------|--------|--------|--|--|---|
| 24 | 2,531.37 | 1,266.19 | 2,514.35 | 1,257.68 | 2,513.36 | 1,257.19 | L | 404.30 | 202.65 | 387.27 | 194.14 |  |  | 2 |
| 25 |          |          |          |          |          |          | K | 291.21 | 146.11 | 274.19 | 137.60 |  |  | 1 |

Query 27499 Hit 1

MS/MS Fragmentation of **TILFIDEIHR**

Found in **sp|Q96S55|WRIP1\_HUMAN**, ATPase WRNIP1 OS=Homo sapiens GN=WRNIP1 PE=1 SV=2

Match to Query 27499: 1399.791 from(467.6041,3+)

Title: 676: Scan 1536 (rt=44.0175, f=3, i=231) [D:\lab212\membrane\Grace\Joyce\iTRAQ\_36\_2.raw]

Data File: Submitted from 20120508-1(merge) by Mascot Daemon on JOYCE-VAIO

Monoisotopic mass of neutral peptide Mr(calc): 1399.791

Variable modifications:

Ions Score: 42.83 Expect: 0.035

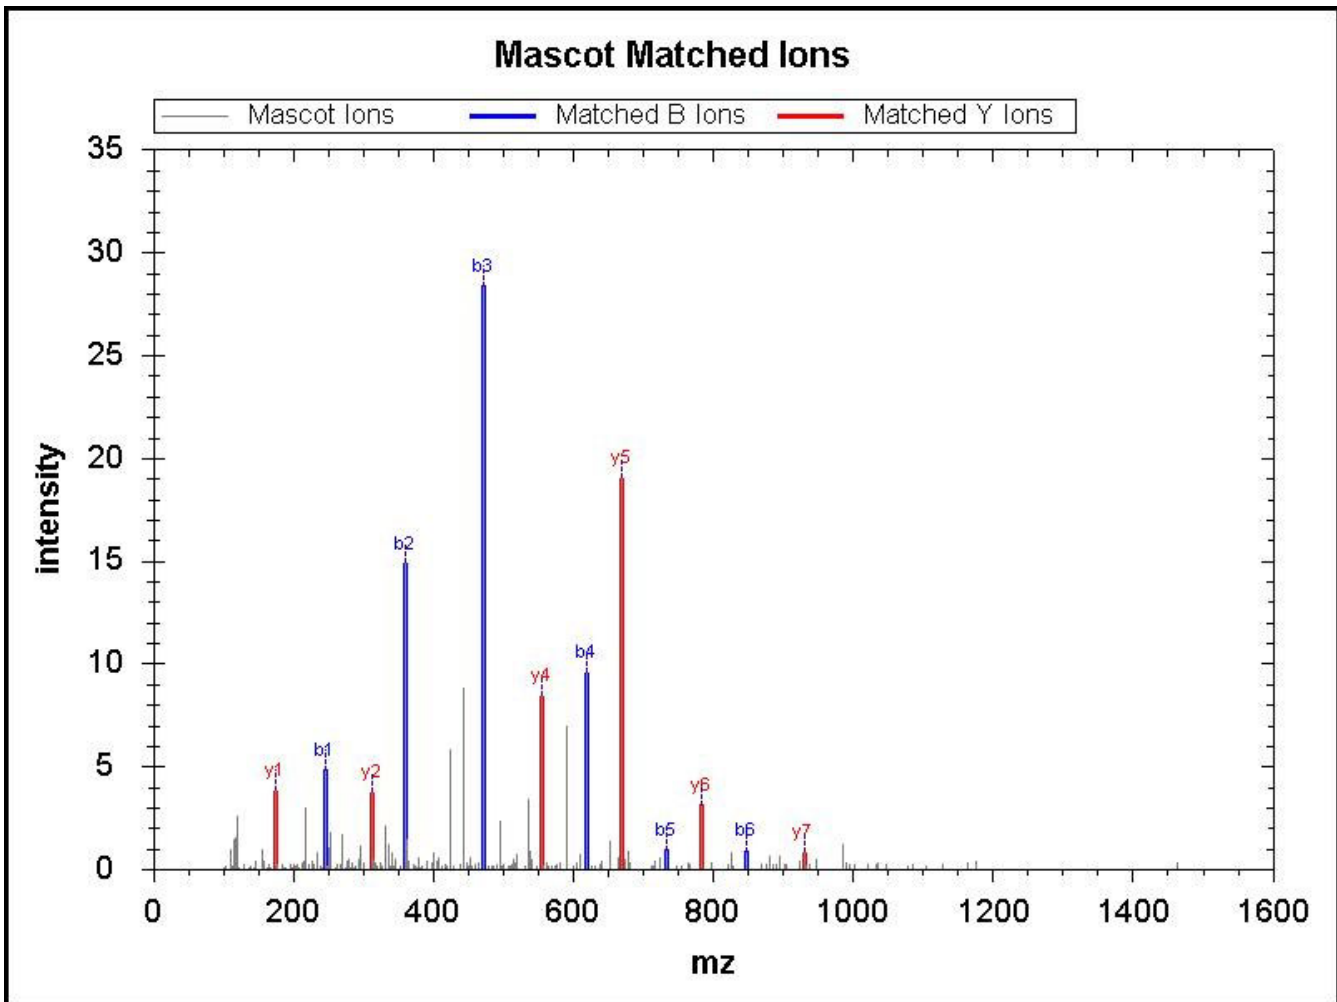

| No | b        | b++    | b0       | b0++   | Seq | y        | y++    | y*       | y*++   | y0       | y0++   | RevNo |
|----|----------|--------|----------|--------|-----|----------|--------|----------|--------|----------|--------|-------|
| 1  | 246.16   | 123.58 | 228.15   | 114.58 | T   |          |        |          |        |          |        | 10    |
| 2  | 359.24   | 180.12 | 341.23   | 171.12 | I   | 1,155.65 | 578.33 | 1,138.63 | 569.82 | 1,137.64 | 569.32 | 9     |
| 3  | 472.33   | 236.67 | 454.31   | 227.66 | L   | 1,042.57 | 521.79 | 1,025.54 | 513.27 | 1,024.56 | 512.78 | 8     |
| 4  | 619.39   | 310.20 | 601.38   | 301.20 | F   | 929.48   | 465.25 | 912.46   | 456.73 | 911.47   | 456.24 | 7     |
| 5  | 732.48   | 366.74 | 714.47   | 357.74 | I   | 782.42   | 391.71 | 765.39   | 383.20 | 764.40   | 382.71 | 6     |
| 6  | 847.50   | 424.26 | 829.49   | 415.25 | D   | 669.33   | 335.17 | 652.30   | 326.66 | 651.32   | 326.16 | 5     |
| 7  | 976.55   | 488.78 | 958.54   | 479.77 | E   | 554.30   | 277.66 | 537.28   | 269.14 | 536.29   | 268.65 | 4     |
| 8  | 1,089.63 | 545.32 | 1,071.62 | 536.31 | I   | 425.26   | 213.13 | 408.24   | 204.62 |          |        | 3     |
| 9  | 1,226.69 | 613.85 | 1,208.68 | 604.84 | H   | 312.18   | 156.59 | 295.15   | 148.08 |          |        | 2     |
| 10 |          |        |          |        | R   | 175.12   | 88.06  | 158.09   | 79.55  |          |        | 1     |

Query 3720 Hit 1

MS/MS Fragmentation of **SGQQEGK**

Found in [sp|P09838|TDT\\_MOUSE](#), DNA nucleotidylexotransferase OS=Mus musculus GN=Dntt PE=1 SV=3  
 Match to Query 3720: 878.4721 from(440.2433,2+)  
 Title: 128: Scan 370 (rt=17.7808, f=2, i=48) [D:\lab212\membrane\Grace\Joyce\iTRAQ\_37\_2.raw]  
 Data File:Submitted from 20120508-1(merge) by Mascot Daemon on JOYCE-VAIO  
 Monoisotopic mass of neutral peptide Mr(calc): 878.4721  
 Variable modifications:  
 Q3 :Deamidated (NQ)  
 Q4 :Deamidated (NQ)  
 K7 :iTRAQ4plex (K)  
 Ions Score: 42.81 Expect: 0.037

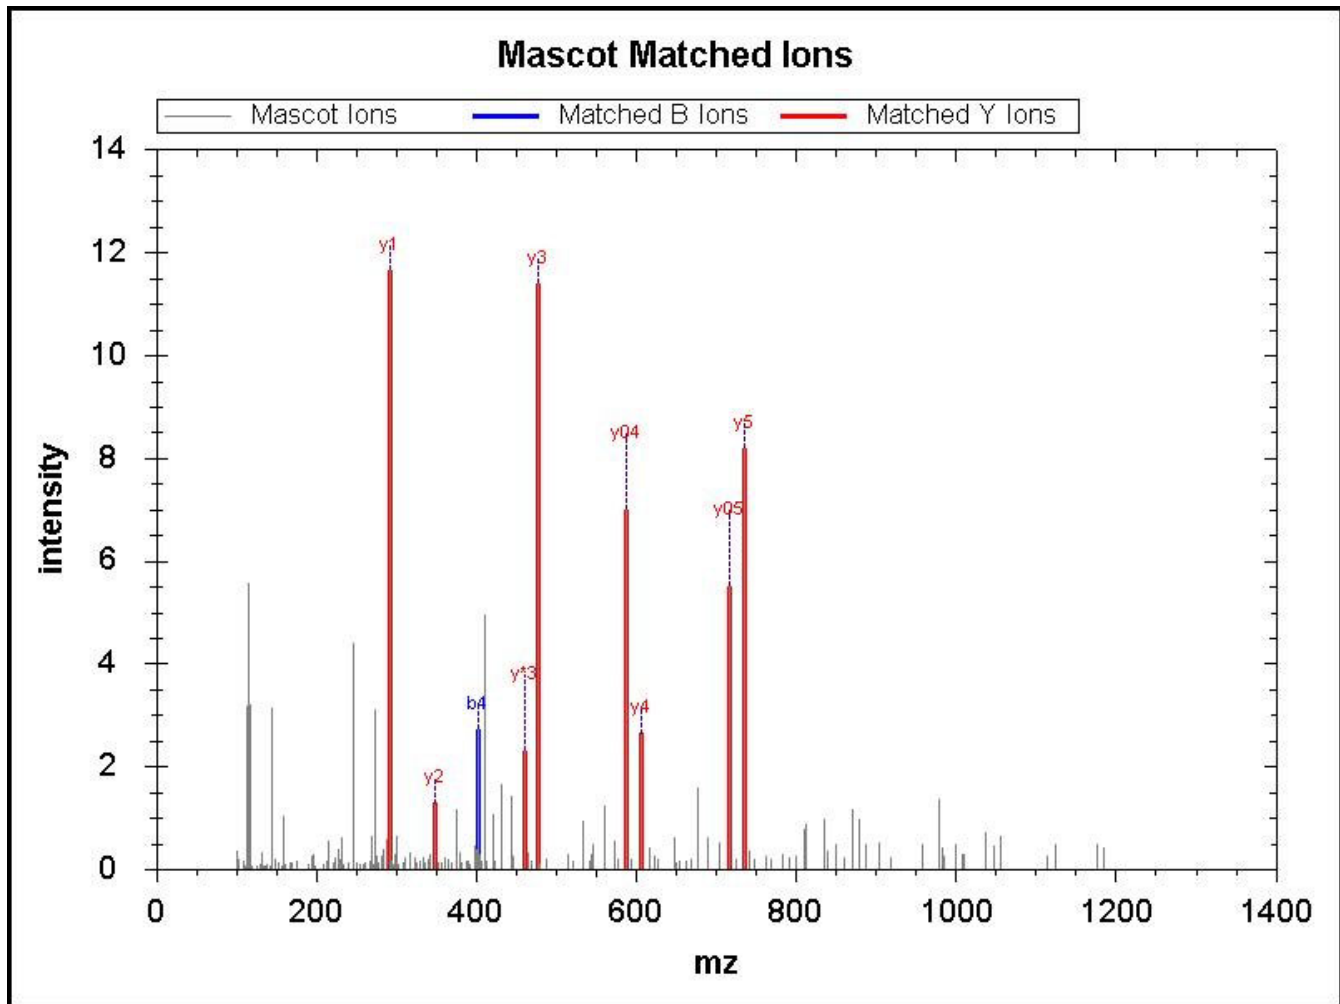

| No | b      | b++    | b*     | b***   | b0     | b0++   | Seq | y      | y++    | y*     | y***   | y0     | y0++   | RevNo |
|----|--------|--------|--------|--------|--------|--------|-----|--------|--------|--------|--------|--------|--------|-------|
| 1  | 88.04  | 44.52  |        |        | 70.03  | 35.52  | S   |        |        |        |        |        |        | 7     |
| 2  | 145.06 | 73.03  |        |        | 127.05 | 64.03  | G   | 792.39 | 396.70 | 775.36 | 388.18 | 774.38 | 387.69 | 6     |
| 3  | 274.10 | 137.56 | 257.08 | 129.04 | 256.09 | 128.55 | Q   | 735.36 | 368.19 | 718.34 | 359.67 | 717.35 | 359.18 | 5     |
| 4  | 403.15 | 202.08 | 386.12 | 193.56 | 385.14 | 193.07 | Q   | 606.32 | 303.66 | 589.29 | 295.15 | 588.31 | 294.66 | 4     |
| 5  | 532.19 | 266.60 | 515.16 | 258.08 | 514.18 | 257.59 | E   | 477.28 | 239.14 | 460.25 | 230.63 | 459.27 | 230.14 | 3     |
| 6  | 589.21 | 295.11 | 572.18 | 286.60 | 571.20 | 286.10 | G   | 348.24 | 174.62 | 331.21 | 166.11 |        |        | 2     |
| 7  |        |        |        |        |        |        | K   | 291.21 | 146.11 | 274.19 | 137.60 |        |        | 1     |

Query 3179 Hit 1

MS/MS Fragmentation of [SGAKVEK](#)

Found in [sp|Q8VDC0|SYLM\\_MOUSE](#), Probable leucine--tRNA ligase  
 Match to Query 3179: 861.5121 from(431.7633,2+)  
 Title: 14: Scan 122 (rt=12.2595, f=2, i=13) [D:\lab212\membrane\Grace\Joyce\iTRAQ\_34\_2.raw]  
 Data File:Submitted from 20120508-1(merge) by Mascot Daemon on JOYCE-VAIO  
 Monoisotopic mass of neutral peptide Mr(calc): 861.5121  
 Variable modifications:  
 K7 :iTRAQ4plex (K)

Ions Score: 42.81 Expect: 0.045

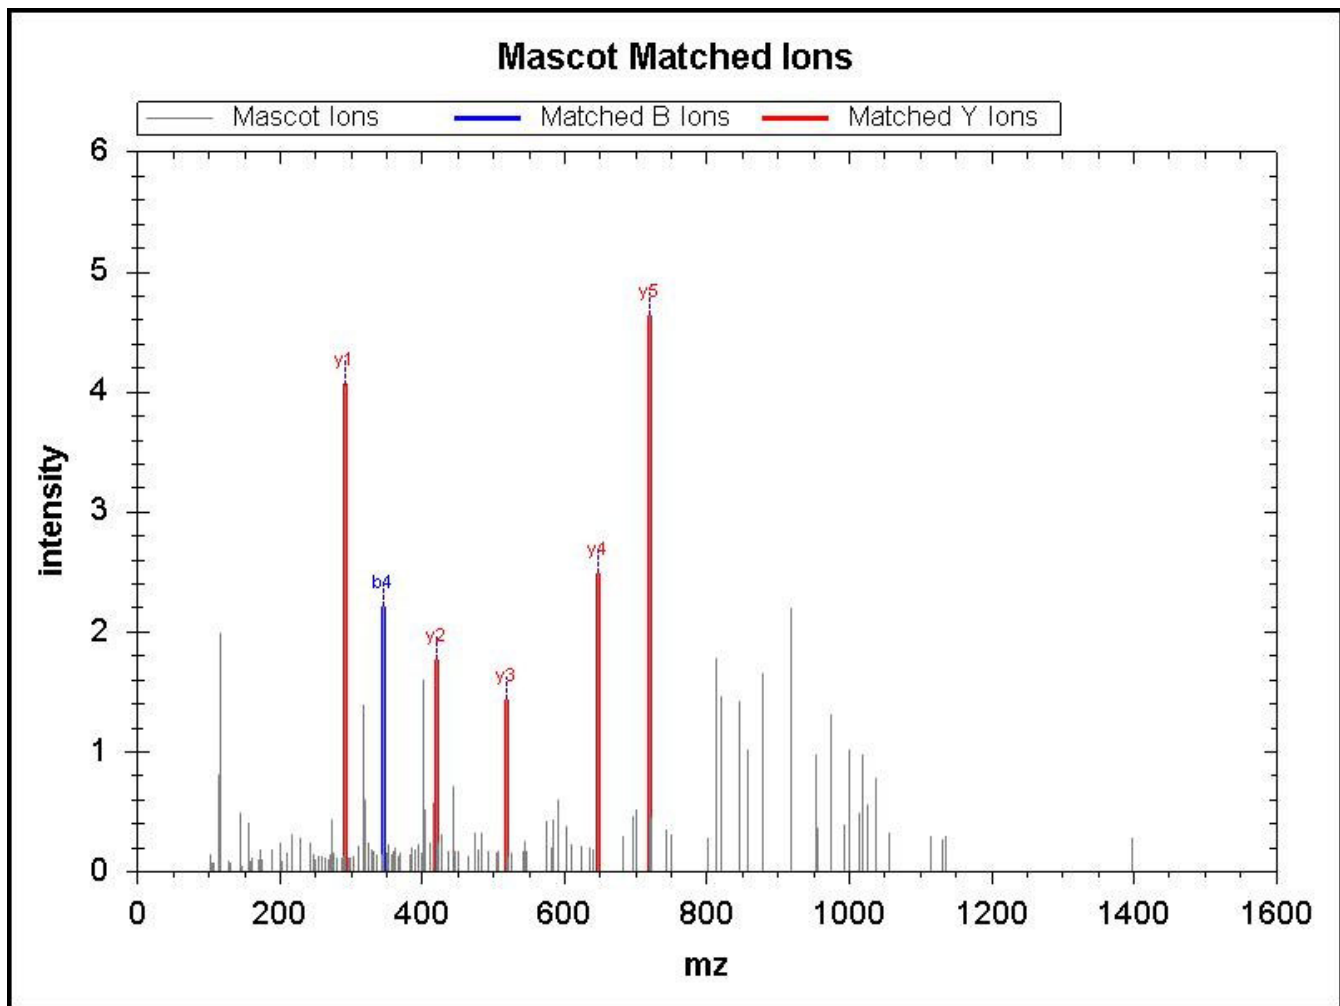

| No | b      | b++    | b*     | b*++   | b0     | b0++   | Seq | y      | y++    | y*     | y*++   | y0     | y0++   | RevNo |
|----|--------|--------|--------|--------|--------|--------|-----|--------|--------|--------|--------|--------|--------|-------|
| 1  | 88.04  | 44.52  |        |        | 70.03  | 35.52  | S   |        |        |        |        |        |        | 7     |
| 2  | 145.06 | 73.03  |        |        | 127.05 | 64.03  | G   | 775.48 | 388.24 | 758.45 | 379.73 | 757.47 | 379.24 | 6     |
| 3  | 216.10 | 108.55 |        |        | 198.09 | 99.55  | A   | 718.46 | 359.73 | 701.43 | 351.22 | 700.45 | 350.73 | 5     |
| 4  | 344.19 | 172.60 | 327.17 | 164.09 | 326.18 | 163.59 | K   | 647.42 | 324.21 | 630.39 | 315.70 | 629.41 | 315.21 | 4     |
| 5  | 443.26 | 222.13 | 426.23 | 213.62 | 425.25 | 213.13 | V   | 519.33 | 260.17 | 502.30 | 251.65 | 501.32 | 251.16 | 3     |
| 6  | 572.30 | 286.66 | 555.28 | 278.14 | 554.29 | 277.65 | E   | 420.26 | 210.63 | 403.23 | 202.12 | 402.25 | 201.63 | 2     |
| 7  |        |        |        |        |        |        | K   | 291.21 | 146.11 | 274.19 | 137.60 |        |        | 1     |

Query 48649 Hit 1

MS/MS Fragmentation of **AGEGLWVILHLYK**

Found in **sp|Q9H2J4|PDCL3\_HUMAN**, Phosducin-like protein 3 OS=Homo sapiens GN=PDCL3 PE=1 SV=1

Match to Query 48649: 1786.039from(596.3535,3+)

Title: 1034: Scan 2277 (rt=60.8643, f=3, i=353) [D:\lab212\membrane\Grace\Joyce\iTRAQ\_42\_1.raw]

Data File: Submitted from 20120508-1(merge) by Mascot Daemon on JOYCE-VAIO

Monoisotopic mass of neutral peptide Mr(calc): 1786.039

Variable modifications:

K13 iTRAQ4plex (K)

Ions Score: 42.79 Expect: 0.026

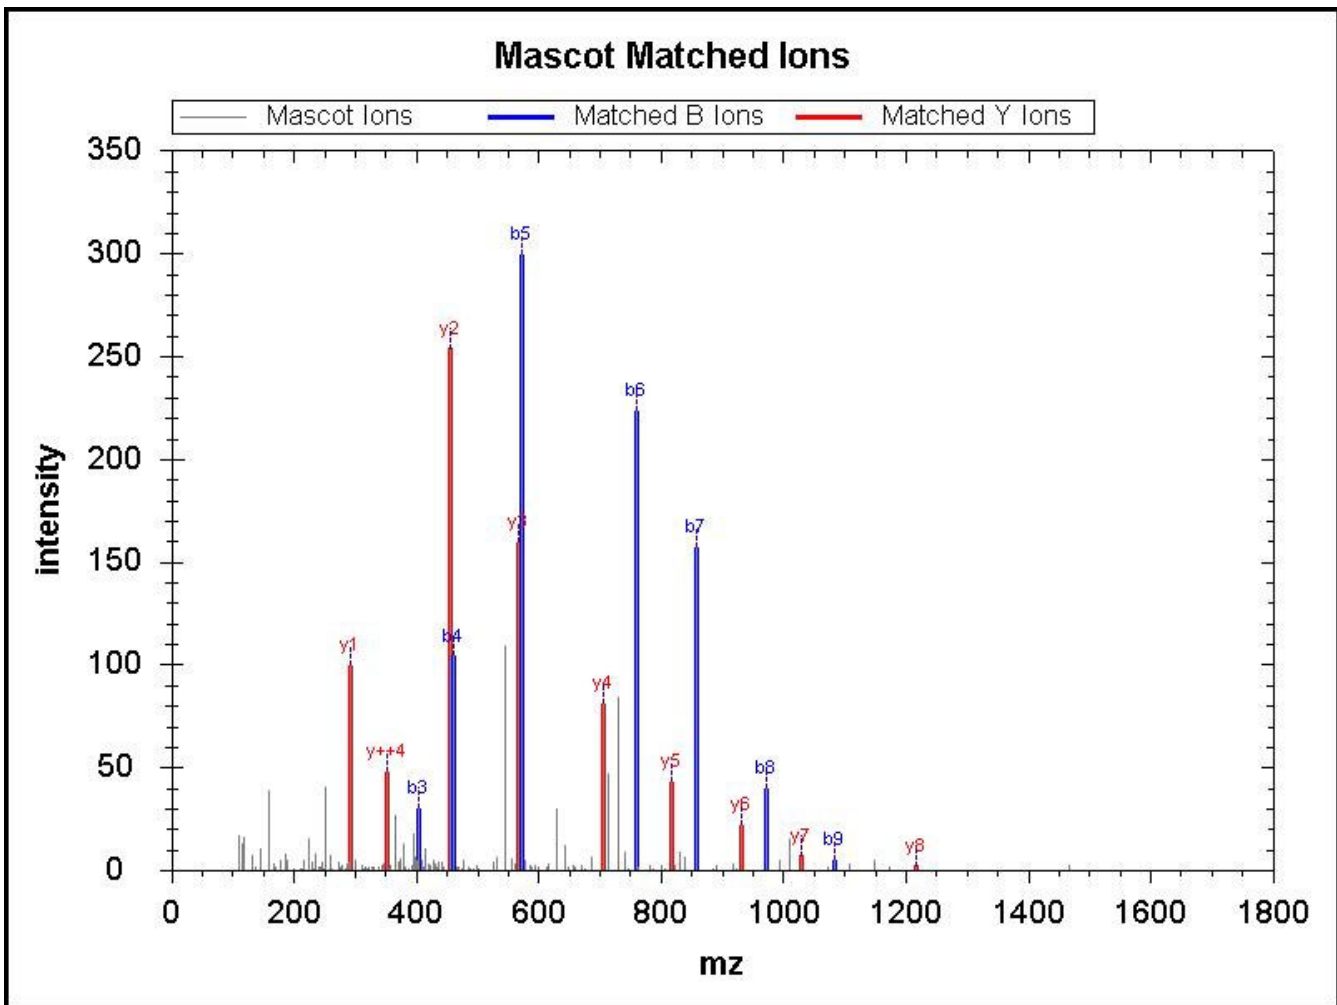

| No | b        | b++    | b0       | b0++   | Seq | y        | y++    | y*       | y*++   | y0       | y0++   | RevNo |
|----|----------|--------|----------|--------|-----|----------|--------|----------|--------|----------|--------|-------|
| 1  | 216.15   | 108.58 |          |        | A   |          |        |          |        |          |        | 13    |
| 2  | 273.17   | 137.09 |          |        | G   | 1,571.91 | 786.46 | 1,554.88 | 777.94 | 1,553.90 | 777.45 | 12    |
| 3  | 402.21   | 201.61 | 384.20   | 192.60 | E   | 1,514.89 | 757.95 | 1,497.86 | 749.43 | 1,496.87 | 748.94 | 11    |
| 4  | 459.23   | 230.12 | 441.22   | 221.11 | G   | 1,385.84 | 693.42 | 1,368.82 | 684.91 |          |        | 10    |
| 5  | 572.32   | 286.66 | 554.31   | 277.66 | L   | 1,328.82 | 664.91 | 1,311.79 | 656.40 |          |        | 9     |
| 6  | 758.40   | 379.70 | 740.38   | 370.70 | W   | 1,215.74 | 608.37 | 1,198.71 | 599.86 |          |        | 8     |
| 7  | 857.46   | 429.24 | 839.45   | 420.23 | V   | 1,029.66 | 515.33 | 1,012.63 | 506.82 |          |        | 7     |
| 8  | 970.55   | 485.78 | 952.54   | 476.77 | I   | 930.59   | 465.80 | 913.56   | 457.28 |          |        | 6     |
| 9  | 1,083.63 | 542.32 | 1,065.62 | 533.31 | L   | 817.51   | 409.26 | 800.48   | 400.74 |          |        | 5     |
| 10 | 1,220.69 | 610.85 | 1,202.68 | 601.84 | H   | 704.42   | 352.71 | 687.39   | 344.20 |          |        | 4     |
| 11 | 1,333.78 | 667.39 | 1,315.76 | 658.39 | L   | 567.36   | 284.18 | 550.34   | 275.67 |          |        | 3     |
| 12 | 1,496.84 | 748.92 | 1,478.83 | 739.92 | Y   | 454.28   | 227.64 | 437.25   | 219.13 |          |        | 2     |
| 13 |          |        |          |        | K   | 291.21   | 146.11 | 274.19   | 137.60 |          |        | 1     |

Query 1250 Hit 1

MS/MS Fragmentation of **SAIVVR**

Found in [sp|Q8R367|REERG\\_MOUSE](#), Ras-related and estrogen-regulated growth inhibitor OS=Mus musculus GN=Rerg PE=2 SV=1  
 Match to Query 1250: 787.4655 from (394.74,2+)

Title: 100: Scan 282 (rt=15.9874, f=2, i=44) [D:\lab212\membrane\Grace\Joyce\iTRAQ\_27\_2\_327.raw]

Data File: Submitted from 20120508-1 (merge) by Mascot Daemon on JOYCE-VAIO

Monoisotopic mass of neutral peptide Mr(calc): 787.4655

Variable modifications:

Ions Score: 42.75 Expect: 0.037

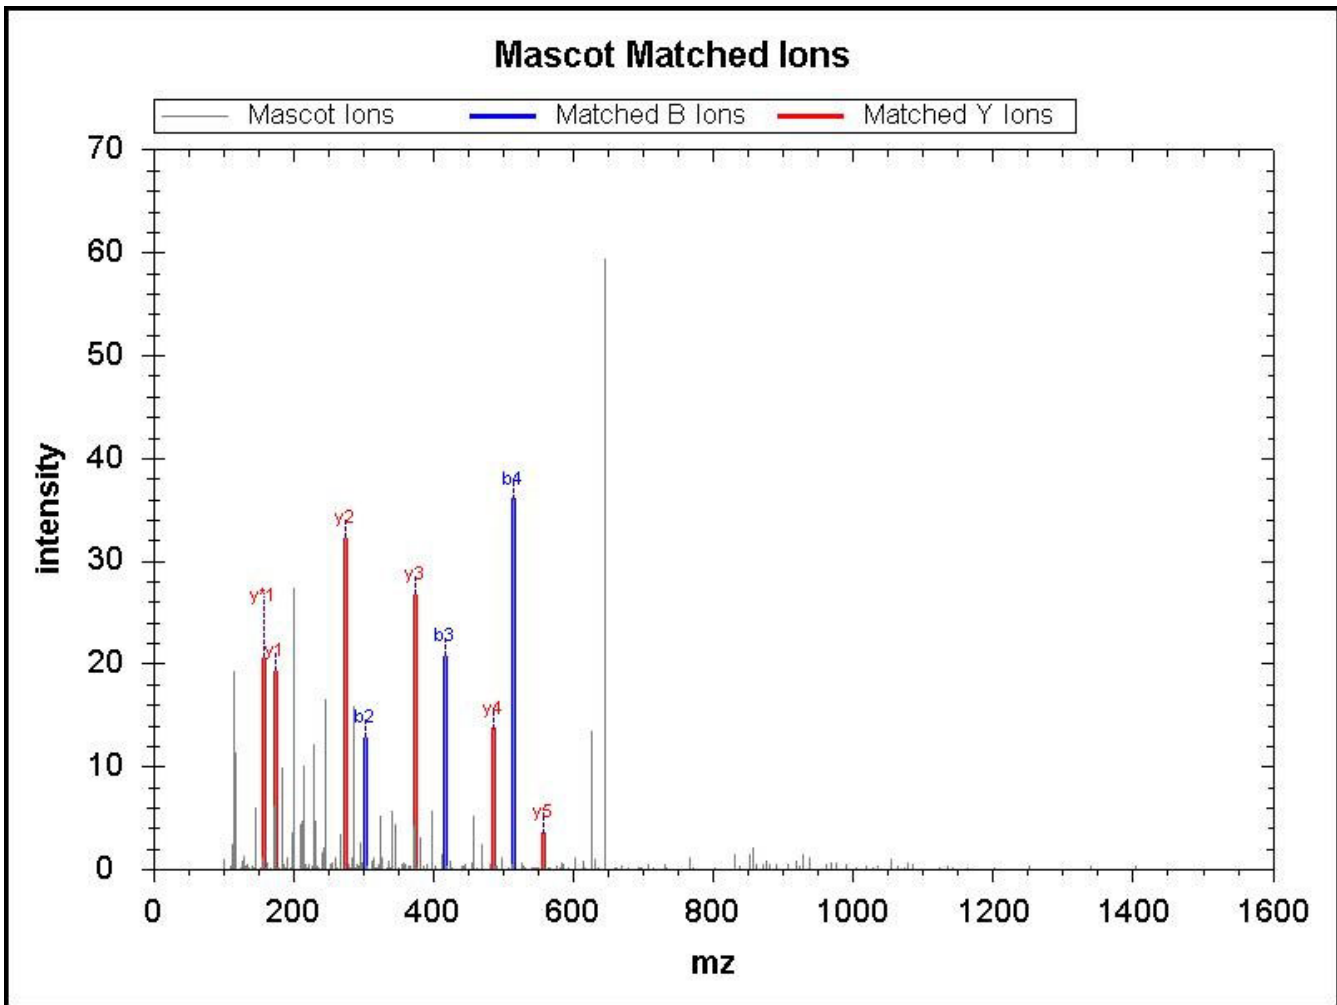

| No | b      | b++    | b0     | b0++   | Seq | y      | y++    | y*     | y*++   | RevNo |
|----|--------|--------|--------|--------|-----|--------|--------|--------|--------|-------|
| 1  | 232.14 | 116.57 | 214.13 | 107.57 | S   |        |        |        |        | 6     |
| 2  | 303.18 | 152.09 | 285.17 | 143.09 | A   | 557.38 | 279.19 | 540.35 | 270.68 | 5     |
| 3  | 416.26 | 208.63 | 398.25 | 199.63 | I   | 486.34 | 243.67 | 469.31 | 235.16 | 4     |
| 4  | 515.33 | 258.17 | 497.32 | 249.16 | V   | 373.26 | 187.13 | 356.23 | 178.62 | 3     |
| 5  | 614.40 | 307.70 | 596.39 | 298.70 | V   | 274.19 | 137.60 | 257.16 | 129.08 | 2     |
| 6  |        |        |        |        | R   | 175.12 | 88.06  | 158.09 | 79.55  | 1     |

Query 90602 Hit 1

MS/MS Fragmentation of **SLVHAGVPASYLLIPAASYVLPEVSK**

Found in **sp|Q9UI10|EI2BD\_HUMAN**, Translation initiation factor eIF-2B subunit delta OS=Homo sapiens GN=EIF2B4 PE=1 SV=2

Match to Query 90602: 2968.682from(743.1777,4+)

Title: 1042: Sum of 2 scans in range 2280 (rt=60.8409, f=4, i=697) to 2281 (rt=60.8663, f=4, i=698)

[D:\lab212\membrane\Grace\Joyce\iTRAQ\_32\_1.raw]

Data File: Submitted from 20120508-1(merge) by Mascot Daemon on JOYCE-VAIO

Monoisotopic mass of neutral peptide Mr(calc): 2968.682

Variable modifications:

K26 iTRAQ4plex (K)

Ions Score: 42.74 Expect: 0.013

### Mascot Matched Ions

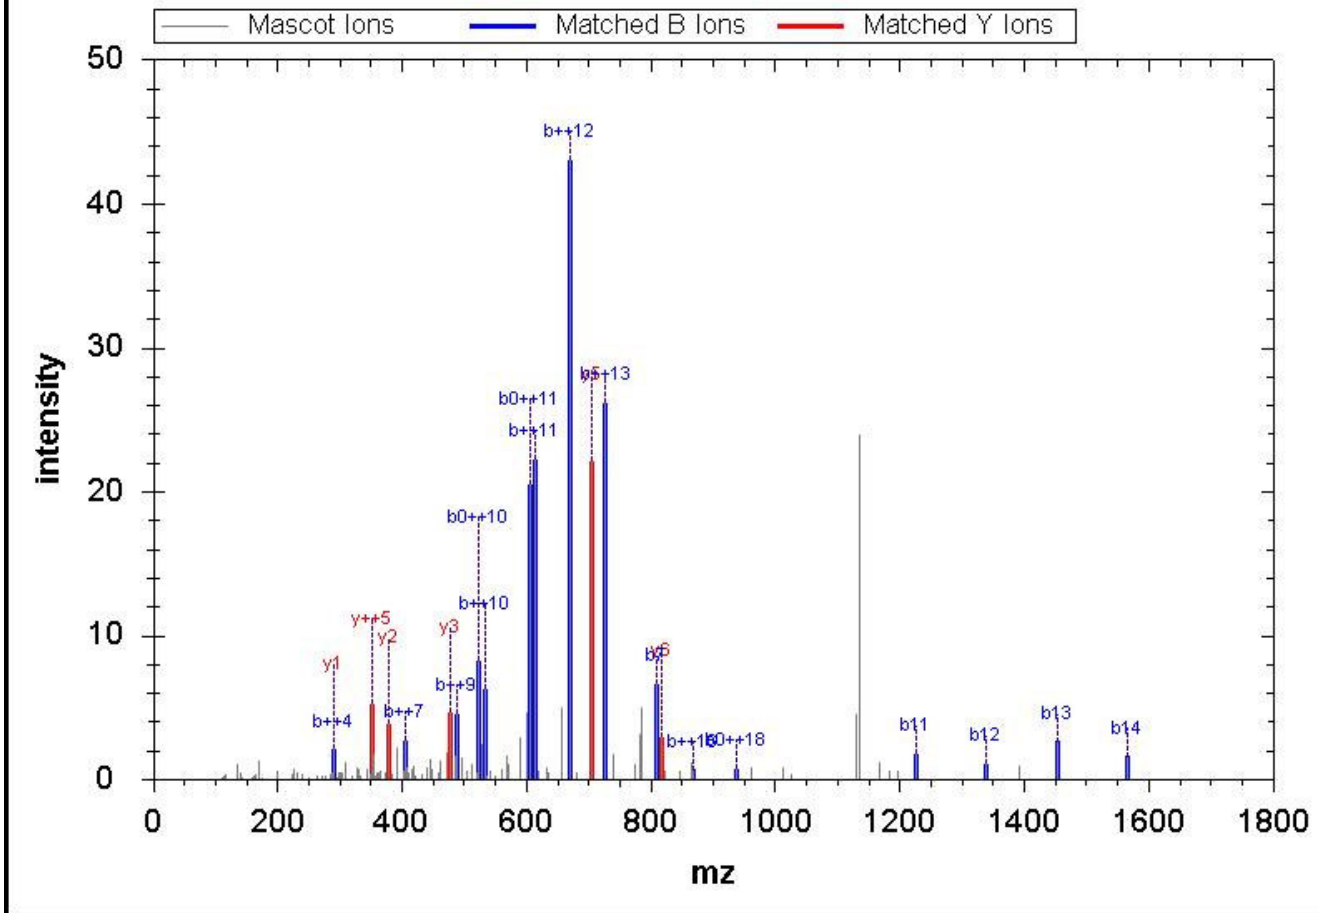

| No | b        | b++      | b0       | b0++     | Seq | y        | y++      | y*       | y*++     | y0       | y0++     | RevNo |
|----|----------|----------|----------|----------|-----|----------|----------|----------|----------|----------|----------|-------|
| 1  | 232.14   | 116.57   | 214.13   | 107.57   | S   |          |          |          |          |          |          | 26    |
| 2  | 345.23   | 173.12   | 327.21   | 164.11   | L   | 2,738.56 | 1,369.78 | 2,721.53 | 1,361.27 | 2,720.55 | 1,360.78 | 25    |
| 3  | 444.29   | 222.65   | 426.28   | 213.65   | V   | 2,625.48 | 1,313.24 | 2,608.45 | 1,304.73 | 2,607.47 | 1,304.24 | 24    |
| 4  | 581.35   | 291.18   | 563.34   | 282.17   | H   | 2,526.41 | 1,263.71 | 2,509.38 | 1,255.19 | 2,508.40 | 1,254.70 | 23    |
| 5  | 652.39   | 326.70   | 634.38   | 317.69   | A   | 2,389.35 | 1,195.18 | 2,372.32 | 1,186.67 | 2,371.34 | 1,186.17 | 22    |
| 6  | 709.41   | 355.21   | 691.40   | 346.20   | G   | 2,318.31 | 1,159.66 | 2,301.29 | 1,151.15 | 2,300.30 | 1,150.65 | 21    |
| 7  | 808.48   | 404.74   | 790.47   | 395.74   | V   | 2,261.29 | 1,131.15 | 2,244.26 | 1,122.64 | 2,243.28 | 1,122.14 | 20    |
| 8  | 905.53   | 453.27   | 887.52   | 444.26   | P   | 2,162.22 | 1,081.62 | 2,145.20 | 1,073.10 | 2,144.21 | 1,072.61 | 19    |
| 9  | 976.57   | 488.79   | 958.56   | 479.78   | A   | 2,065.17 | 1,033.09 | 2,048.14 | 1,024.58 | 2,047.16 | 1,024.08 | 18    |
| 10 | 1,063.60 | 532.30   | 1,045.59 | 523.30   | S   | 1,994.13 | 997.57   | 1,977.11 | 989.06   | 1,976.12 | 988.56   | 17    |
| 11 | 1,226.67 | 613.84   | 1,208.65 | 604.83   | Y   | 1,907.10 | 954.05   | 1,890.07 | 945.54   | 1,889.09 | 945.05   | 16    |
| 12 | 1,339.75 | 670.38   | 1,321.74 | 661.37   | L   | 1,744.04 | 872.52   | 1,727.01 | 864.01   | 1,726.03 | 863.52   | 15    |
| 13 | 1,452.83 | 726.92   | 1,434.82 | 717.91   | L   | 1,630.95 | 815.98   | 1,613.93 | 807.47   | 1,612.94 | 806.98   | 14    |
| 14 | 1,565.92 | 783.46   | 1,547.91 | 774.46   | I   | 1,517.87 | 759.44   | 1,500.84 | 750.93   | 1,499.86 | 750.43   | 13    |
| 15 | 1,662.97 | 831.99   | 1,644.96 | 822.98   | P   | 1,404.79 | 702.90   | 1,387.76 | 694.38   | 1,386.77 | 693.89   | 12    |
| 16 | 1,734.01 | 867.51   | 1,716.00 | 858.50   | A   | 1,307.73 | 654.37   | 1,290.71 | 645.86   | 1,289.72 | 645.36   | 11    |
| 17 | 1,805.04 | 903.03   | 1,787.03 | 894.02   | A   | 1,236.70 | 618.85   | 1,219.67 | 610.34   | 1,218.68 | 609.85   | 10    |
| 18 | 1,892.08 | 946.54   | 1,874.07 | 937.54   | S   | 1,165.66 | 583.33   | 1,148.63 | 574.82   | 1,147.65 | 574.33   | 9     |
| 19 | 2,055.14 | 1,028.07 | 2,037.13 | 1,019.07 | Y   | 1,078.63 | 539.82   | 1,061.60 | 531.30   | 1,060.62 | 530.81   | 8     |
| 20 | 2,154.21 | 1,077.61 | 2,136.20 | 1,068.60 | V   | 915.56   | 458.29   | 898.54   | 449.77   | 897.55   | 449.28   | 7     |
| 21 | 2,267.29 | 1,134.15 | 2,249.28 | 1,125.14 | L   | 816.49   | 408.75   | 799.47   | 400.24   | 798.48   | 399.75   | 6     |
| 22 | 2,364.34 | 1,182.68 | 2,346.33 | 1,173.67 | P   | 703.41   | 352.21   | 686.38   | 343.70   | 685.40   | 343.20   | 5     |
| 23 | 2,493.39 | 1,247.20 | 2,475.38 | 1,238.19 | E   | 606.36   | 303.68   | 589.33   | 295.17   | 588.35   | 294.68   | 4     |
| 24 | 2,592.46 | 1,296.73 | 2,574.45 | 1,287.73 | V   | 477.32   | 239.16   | 460.29   | 230.65   | 459.30   | 230.16   | 3     |

|    |          |          |          |          |   |        |        |        |        |        |        |   |
|----|----------|----------|----------|----------|---|--------|--------|--------|--------|--------|--------|---|
| 25 | 2,679.49 | 1,340.25 | 2,661.48 | 1,331.24 | S | 378.25 | 189.63 | 361.22 | 181.11 | 360.24 | 180.62 | 2 |
| 26 |          |          |          |          | K | 291.21 | 146.11 | 274.19 | 137.60 |        |        | 1 |

Query 30374 Hit 1

MS/MS Fragmentation of **KHEIEAAIVR**

Found in **sp|Q13618|CUL3\_HUMAN**, Cullin-3 OS=Homo sapiens GN=CUL3 PE=1 SV=2

Match to Query 30374: 1452.872from(485.298,3+)

Title: 239: Scan 578 (rt=22.6143, f=2, i=88) [D:\lab212\membrane\Grace\Joyce\iTRAQ\_53\_1.raw]

Data File: Submitted from 20120508-1(merge) by Mascot Daemon on JOYCE-VAIO

Monoisotopic mass of neutral peptide Mr(calc): 1452.872

Variable modifications:

K1 iTRAQ4plex (K)

Ions Score: 42.67 Expect: 0.024

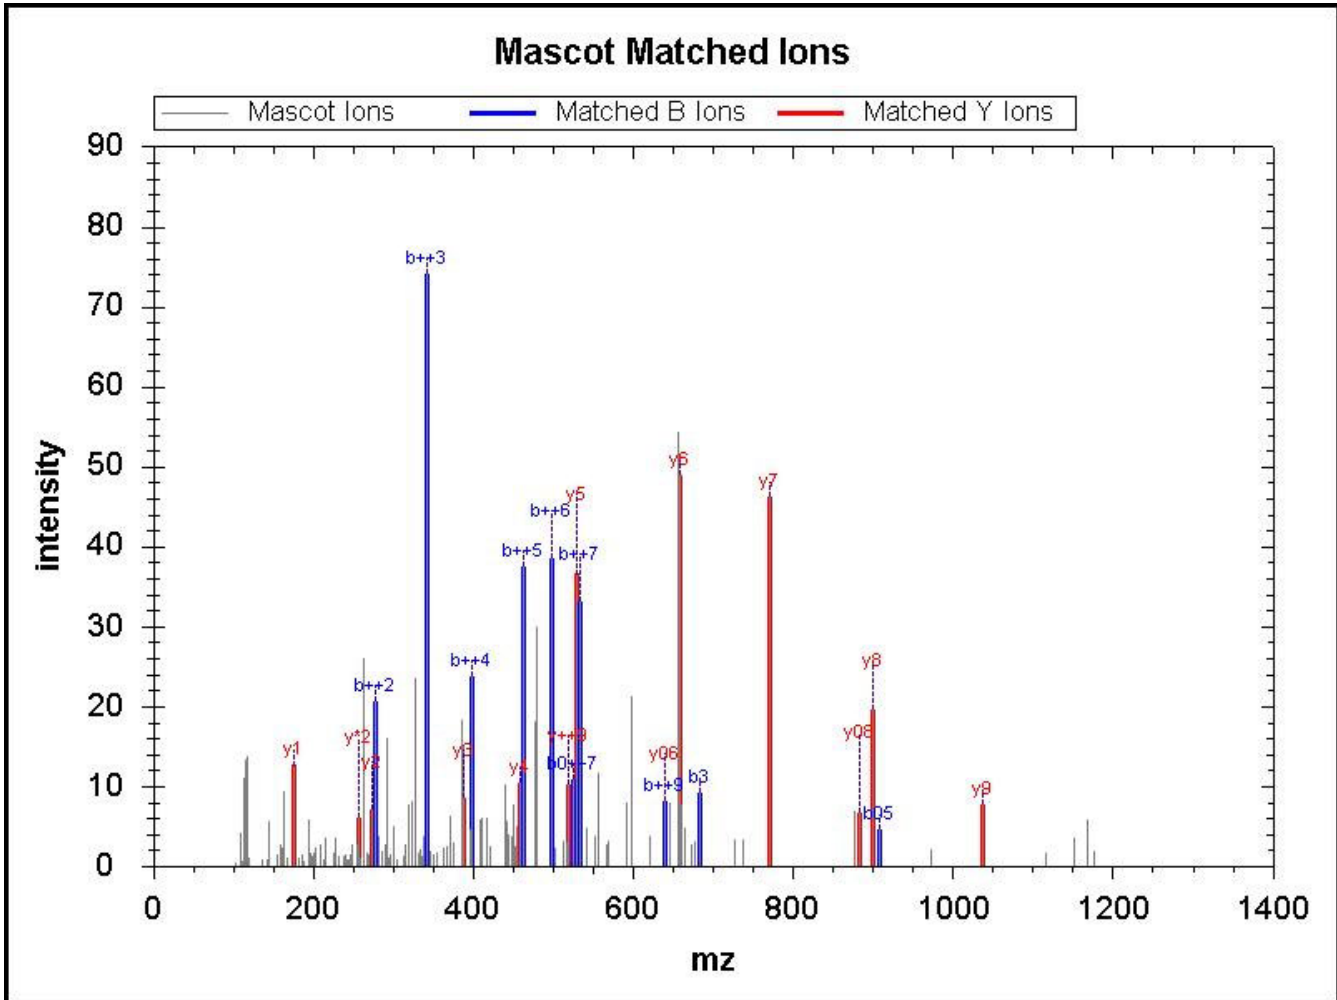

| No | b        | b++    | b*       | b*++   | b0       | b0++   | Seq | y        | y++    | y*       | y*++   | y0       | y0++   | RevNo |
|----|----------|--------|----------|--------|----------|--------|-----|----------|--------|----------|--------|----------|--------|-------|
| 1  | 417.31   | 209.16 | 400.28   | 200.64 |          |        | K   |          |        |          |        |          |        | 10    |
| 2  | 554.37   | 277.69 | 537.34   | 269.17 |          |        | H   | 1,037.57 | 519.29 | 1,020.55 | 510.78 | 1,019.56 | 510.29 | 9     |
| 3  | 683.41   | 342.21 | 666.38   | 333.69 | 665.40   | 333.20 | E   | 900.51   | 450.76 | 883.49   | 442.25 | 882.50   | 441.76 | 8     |
| 4  | 796.49   | 398.75 | 779.47   | 390.24 | 778.48   | 389.74 | I   | 771.47   | 386.24 | 754.45   | 377.73 | 753.46   | 377.23 | 7     |
| 5  | 925.53   | 463.27 | 908.51   | 454.76 | 907.52   | 454.27 | E   | 658.39   | 329.70 | 641.36   | 321.18 | 640.38   | 320.69 | 6     |
| 6  | 996.57   | 498.79 | 979.55   | 490.28 | 978.56   | 489.78 | A   | 529.35   | 265.18 | 512.32   | 256.66 |          |        | 5     |
| 7  | 1,067.61 | 534.31 | 1,050.58 | 525.79 | 1,049.60 | 525.30 | A   | 458.31   | 229.66 | 441.28   | 221.14 |          |        | 4     |
| 8  | 1,180.69 | 590.85 | 1,163.67 | 582.34 | 1,162.68 | 581.84 | I   | 387.27   | 194.14 | 370.24   | 185.63 |          |        | 3     |
| 9  | 1,279.76 | 640.38 | 1,262.73 | 631.87 | 1,261.75 | 631.38 | V   | 274.19   | 137.60 | 257.16   | 129.08 |          |        | 2     |
| 10 |          |        |          |        |          |        | R   | 175.12   | 88.06  | 158.09   | 79.55  |          |        | 1     |

Query 51833 Hit 1

MS/MS Fragmentation of **AGAEDDEEKGEGTPR**

Found in **sp|Q86VM9|ZCH18\_HUMAN**, Zinc finger CCCH domain-containing protein 18 OS=Homo sapiens GN=ZC3H18 PE=1 SV=2

Match to Query 51833: 1847.877 from (616.9664,3+)

Title: 46: Scan 197 (rt=14.0282, f=3, i=19) [D:\lab212\membrane\GraceJoyce\iTRAQ\_44\_2.raw]

Data File: Submitted from 20120508-1(merge) by Mascot Daemon on JOYCE-VAIO

Monoisotopic mass of neutral peptide Mr(calc): 1847.877

Variable modifications:

K9 iTRAQ4plex (K)

Ions Score: 42.67 Expect: 0.040

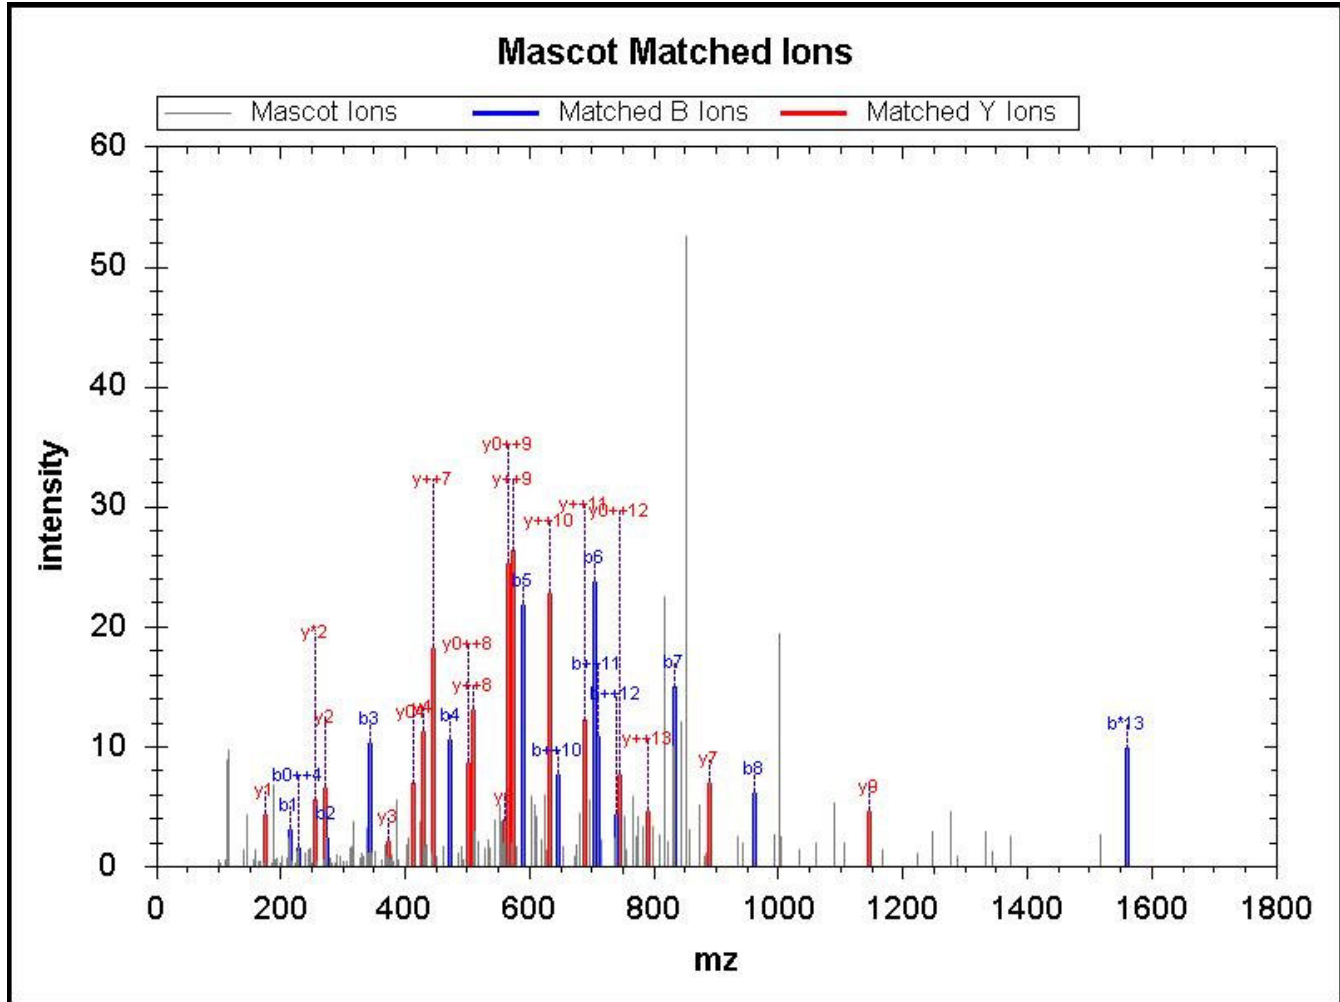

| No | b        | b++    | b*       | b*++   | b0       | b0++   | Seq | y        | y++    | y*       | y*++   | y0       | y0++   | RevNo |
|----|----------|--------|----------|--------|----------|--------|-----|----------|--------|----------|--------|----------|--------|-------|
| 1  | 216.15   | 108.58 |          |        |          |        | A   |          |        |          |        |          |        | 15    |
| 2  | 273.17   | 137.09 |          |        |          |        | G   | 1,633.74 | 817.37 | 1,616.72 | 808.86 | 1,615.73 | 808.37 | 14    |
| 3  | 344.21   | 172.61 |          |        |          |        | A   | 1,576.72 | 788.86 | 1,559.69 | 780.35 | 1,558.71 | 779.86 | 13    |
| 4  | 473.25   | 237.13 |          |        | 455.24   | 228.12 | E   | 1,505.68 | 753.35 | 1,488.66 | 744.83 | 1,487.67 | 744.34 | 12    |
| 5  | 588.27   | 294.64 |          |        | 570.26   | 285.64 | D   | 1,376.64 | 688.82 | 1,359.61 | 680.31 | 1,358.63 | 679.82 | 11    |
| 6  | 703.30   | 352.15 |          |        | 685.29   | 343.15 | D   | 1,261.61 | 631.31 | 1,244.59 | 622.80 | 1,243.60 | 622.31 | 10    |
| 7  | 832.34   | 416.68 |          |        | 814.33   | 407.67 | E   | 1,146.59 | 573.80 | 1,129.56 | 565.28 | 1,128.58 | 564.79 | 9     |
| 8  | 961.39   | 481.20 |          |        | 943.38   | 472.19 | E   | 1,017.54 | 509.28 | 1,000.52 | 500.76 | 999.53   | 500.27 | 8     |
| 9  | 1,233.58 | 617.30 | 1,216.56 | 608.78 | 1,215.57 | 608.29 | K   | 888.50   | 444.75 | 871.48   | 436.24 | 870.49   | 435.75 | 7     |
| 10 | 1,290.61 | 645.81 | 1,273.58 | 637.29 | 1,272.59 | 636.80 | G   | 616.30   | 308.66 | 599.28   | 300.14 | 598.29   | 299.65 | 6     |
| 11 | 1,419.65 | 710.33 | 1,402.62 | 701.81 | 1,401.64 | 701.32 | E   | 559.28   | 280.15 | 542.26   | 271.63 | 541.27   | 271.14 | 5     |
| 12 | 1,476.67 | 738.84 | 1,459.64 | 730.33 | 1,458.66 | 729.83 | G   | 430.24   | 215.62 | 413.21   | 207.11 | 412.23   | 206.62 | 4     |
| 13 | 1,577.72 | 789.36 | 1,560.69 | 780.85 | 1,559.71 | 780.36 | T   | 373.22   | 187.11 | 356.19   | 178.60 | 355.21   | 178.11 | 3     |
| 14 | 1,674.77 | 837.89 | 1,657.74 | 829.38 | 1,656.76 | 828.88 | P   | 272.17   | 136.59 | 255.15   | 128.08 |          |        | 2     |
| 15 |          |        |          |        |          |        | R   | 175.12   | 88.06  | 158.09   | 79.55  |          |        | 1     |



Query 87580 Hit 1

MS/MS Fragmentation of **GDLSGFHFEHVMVALVTAPALFDAK**

Found in **sp|O35639|ANXA3\_MOUSE**, Annexin A3 OS=Mus musculus GN=Anxa3 PE=1 SV=4

Match to Query 87580: 2812.483from(704.1281,4+)

Title: 1135: Scan 2451 (rt=64.8336, f=2, i=399) [D:\lab212\membrane\Grace\Joyce\iTRAQ\_45\_2.raw]

Data File: Submitted from 20120508-1(merge) by Mascot Daemon on JOYCE-VAIO

Monoisotopic mass of neutral peptide Mr(calc): 2812.483

Variable modifications:

K24 :iTRAQ4plex (K)

Ions Score: 42.67 Expect: 0.041

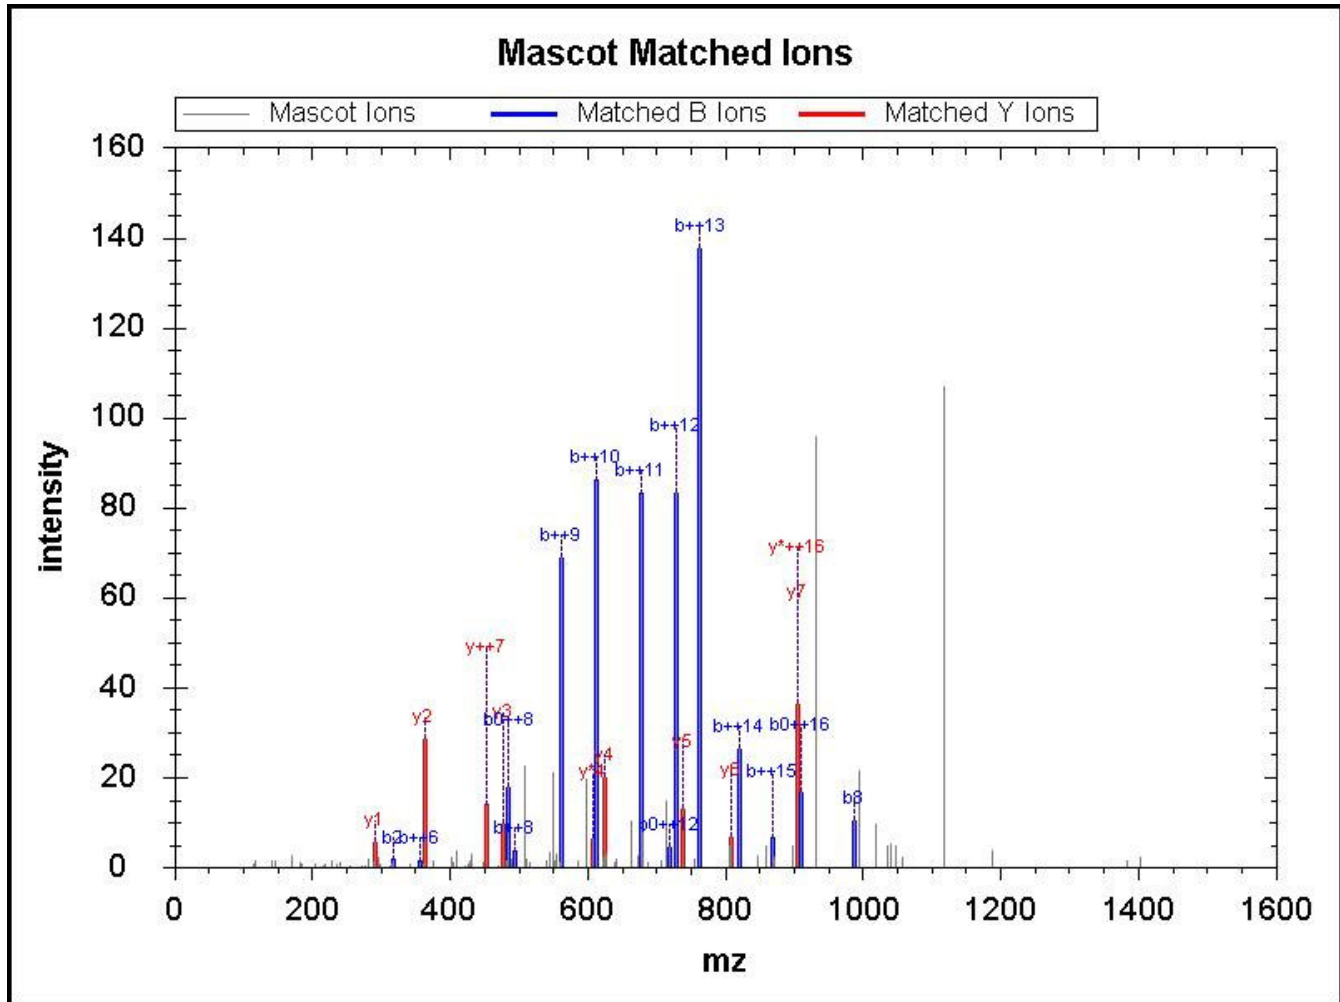

| No | b        | b++    | b0       | b0++   | Seq | y        | y++      | y*       | y*++     | y0       | y0++     | RevNo |
|----|----------|--------|----------|--------|-----|----------|----------|----------|----------|----------|----------|-------|
| 1  | 202.13   | 101.57 |          |        | G   |          |          |          |          |          |          | 24    |
| 2  | 317.16   | 159.08 | 299.15   | 150.08 | D   | 2,612.37 | 1,306.69 | 2,595.34 | 1,298.17 | 2,594.36 | 1,297.68 | 23    |
| 3  | 430.24   | 215.62 | 412.23   | 206.62 | L   | 2,497.34 | 1,249.17 | 2,480.31 | 1,240.66 | 2,479.33 | 1,240.17 | 22    |
| 4  | 517.27   | 259.14 | 499.26   | 250.14 | S   | 2,384.26 | 1,192.63 | 2,367.23 | 1,184.12 | 2,366.24 | 1,183.63 | 21    |
| 5  | 574.30   | 287.65 | 556.28   | 278.65 | G   | 2,297.22 | 1,149.12 | 2,280.20 | 1,140.60 | 2,279.21 | 1,140.11 | 20    |
| 6  | 711.35   | 356.18 | 693.34   | 347.18 | H   | 2,240.20 | 1,120.60 | 2,223.18 | 1,112.09 | 2,222.19 | 1,111.60 | 19    |
| 7  | 858.42   | 429.71 | 840.41   | 420.71 | F   | 2,103.14 | 1,052.08 | 2,086.12 | 1,043.56 | 2,085.13 | 1,043.07 | 18    |
| 8  | 987.47   | 494.24 | 969.45   | 485.23 | E   | 1,956.07 | 978.54   | 1,939.05 | 970.03   | 1,938.06 | 969.54   | 17    |
| 9  | 1,124.52 | 562.77 | 1,106.51 | 553.76 | H   | 1,827.03 | 914.02   | 1,810.01 | 905.51   | 1,809.02 | 905.01   | 16    |
| 10 | 1,223.59 | 612.30 | 1,205.58 | 603.29 | V   | 1,689.97 | 845.49   | 1,672.95 | 836.98   | 1,671.96 | 836.48   | 15    |
| 11 | 1,354.63 | 677.82 | 1,336.62 | 668.81 | M   | 1,590.90 | 795.96   | 1,573.88 | 787.44   | 1,572.89 | 786.95   | 14    |
| 12 | 1,453.70 | 727.35 | 1,435.69 | 718.35 | V   | 1,459.86 | 730.44   | 1,442.84 | 721.92   | 1,441.85 | 721.43   | 13    |
| 13 | 1,524.74 | 762.87 | 1,506.73 | 753.87 | A   | 1,360.80 | 680.90   | 1,343.77 | 672.39   | 1,342.79 | 671.90   | 12    |
| 14 | 1,637.82 | 819.42 | 1,619.81 | 810.41 | L   | 1,289.76 | 645.38   | 1,272.73 | 636.87   | 1,271.75 | 636.38   | 11    |

|    |          |          |          |          |   |          |        |          |        |          |        |    |
|----|----------|----------|----------|----------|---|----------|--------|----------|--------|----------|--------|----|
| 15 | 1,736.89 | 868.95   | 1,718.88 | 859.94   | V | 1,176.67 | 588.84 | 1,159.65 | 580.33 | 1,158.66 | 579.84 | 10 |
| 16 | 1,837.94 | 919.47   | 1,819.93 | 910.47   | T | 1,077.61 | 539.31 | 1,060.58 | 530.79 | 1,059.60 | 530.30 | 9  |
| 17 | 1,908.98 | 954.99   | 1,890.97 | 945.99   | A | 976.56   | 488.78 | 959.53   | 480.27 | 958.55   | 479.78 | 8  |
| 18 | 2,006.03 | 1,003.52 | 1,988.02 | 994.51   | P | 905.52   | 453.26 | 888.49   | 444.75 | 887.51   | 444.26 | 7  |
| 19 | 2,077.07 | 1,039.04 | 2,059.06 | 1,030.03 | A | 808.47   | 404.74 | 791.44   | 396.22 | 790.46   | 395.73 | 6  |
| 20 | 2,190.15 | 1,095.58 | 2,172.14 | 1,086.57 | L | 737.43   | 369.22 | 720.40   | 360.71 | 719.42   | 360.21 | 5  |
| 21 | 2,337.22 | 1,169.11 | 2,319.21 | 1,160.11 | F | 624.35   | 312.68 | 607.32   | 304.16 | 606.34   | 303.67 | 4  |
| 22 | 2,452.25 | 1,226.63 | 2,434.23 | 1,217.62 | D | 477.28   | 239.14 | 460.25   | 230.63 | 459.27   | 230.14 | 3  |
| 23 | 2,523.28 | 1,262.14 | 2,505.27 | 1,253.14 | A | 362.25   | 181.63 | 345.23   | 173.12 |          |        | 2  |
| 24 |          |          |          |          | K | 291.21   | 146.11 | 274.19   | 137.60 |          |        | 1  |

Query 55727 Hit 1

MS/MS Fragmentation of **VLLVIDEPHTDWA**K

Found in **sp|P17600|SYN1\_HUMAN**, Synapsin-1 OS=Homo sapiens GN=SYN1 PE=1 SV=3

Match to Query 55727: 1923.07from(642.0306,3+)

Title: 677: Sum of 2 scans in range 1538 (rt=43.9855, f=4, i=443) to 1539 (rt=44.0109, f=4, i=444)

[D:\lab212\membrane\GraceJoyce\iTRAQ\_38\_1.raw]

Data File: Submitted from 20120508-1(merge) by Mascot Daemon on JOYCE-VAIO

Monoisotopic mass of neutral peptide Mr(calc): 1923.07

Variable modifications:

K14 :iTRAQ4plex (K)

Ions Score: 42.64 Expect: 0.039

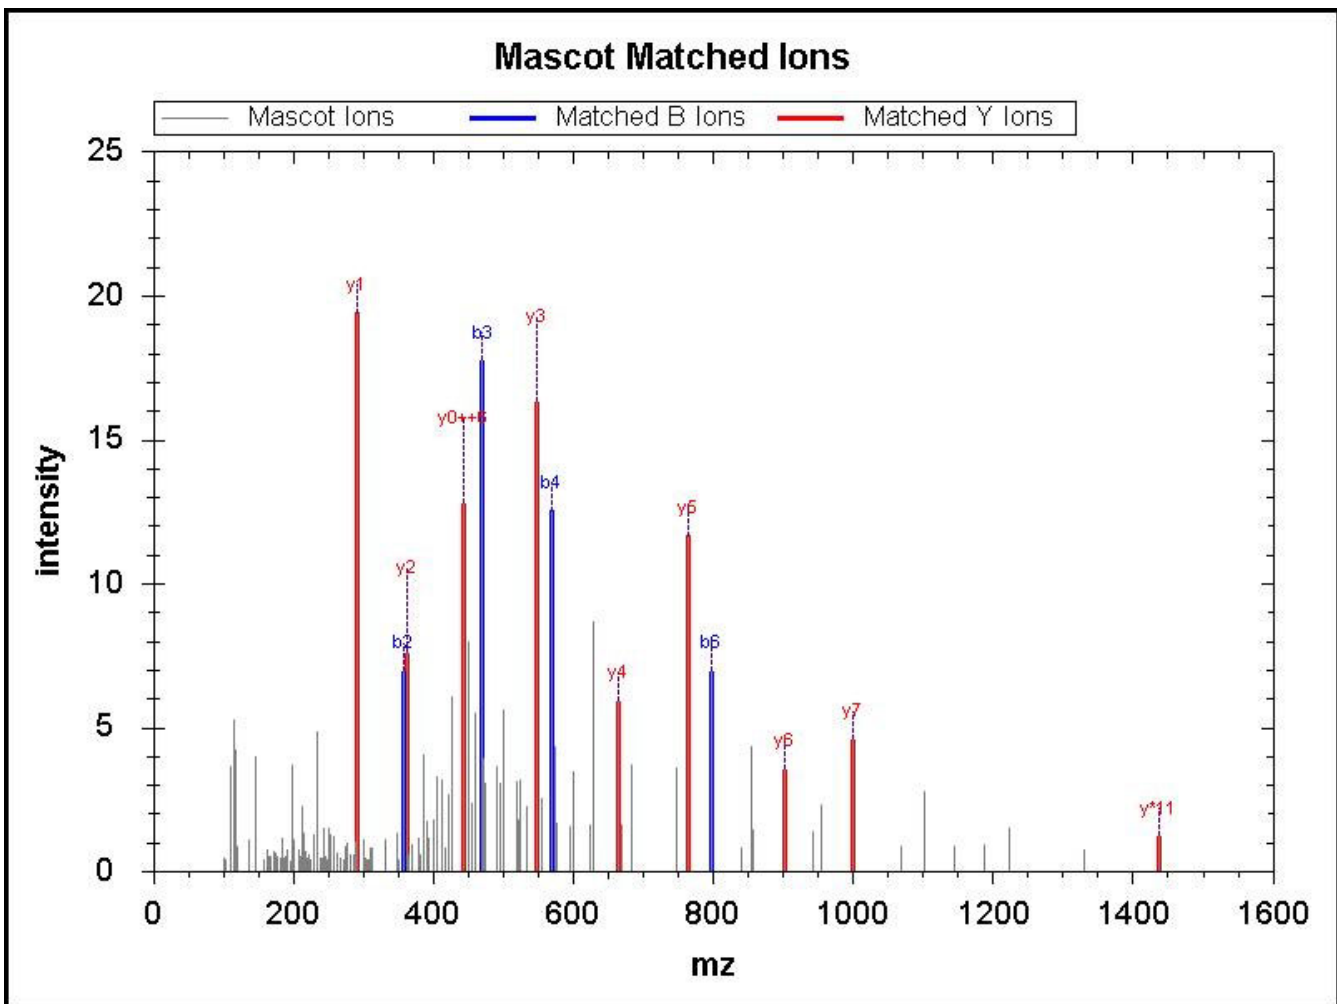

| No | b      | b++    | b0 | b0++ | Seq | y        | y++    | y*       | y*++   | y0       | y0++   | RevNo |
|----|--------|--------|----|------|-----|----------|--------|----------|--------|----------|--------|-------|
| 1  | 244.18 | 122.59 |    |      | V   |          |        |          |        |          |        | 14    |
| 2  | 357.26 | 179.13 |    |      | L   | 1,680.91 | 840.96 | 1,663.88 | 832.44 | 1,662.90 | 831.95 | 13    |
| 3  | 470.35 | 235.68 |    |      | L   | 1,567.82 | 784.42 | 1,550.80 | 775.90 | 1,549.81 | 775.41 | 12    |

|    |          |        |          |        |   |          |        |          |        |          |        |    |
|----|----------|--------|----------|--------|---|----------|--------|----------|--------|----------|--------|----|
| 4  | 569.41   | 285.21 |          |        | V | 1,454.74 | 727.87 | 1,437.71 | 719.36 | 1,436.73 | 718.87 | 11 |
| 5  | 682.50   | 341.75 |          |        | I | 1,355.67 | 678.34 | 1,338.64 | 669.83 | 1,337.66 | 669.33 | 10 |
| 6  | 797.53   | 399.27 | 779.51   | 390.26 | D | 1,242.59 | 621.80 | 1,225.56 | 613.28 | 1,224.58 | 612.79 | 9  |
| 7  | 926.57   | 463.79 | 908.56   | 454.78 | E | 1,127.56 | 564.28 | 1,110.53 | 555.77 | 1,109.55 | 555.28 | 8  |
| 8  | 1,023.62 | 512.31 | 1,005.61 | 503.31 | P | 998.52   | 499.76 | 981.49   | 491.25 | 980.51   | 490.76 | 7  |
| 9  | 1,160.68 | 580.84 | 1,142.67 | 571.84 | H | 901.46   | 451.24 | 884.44   | 442.72 | 883.45   | 442.23 | 6  |
| 10 | 1,261.73 | 631.37 | 1,243.72 | 622.36 | T | 764.41   | 382.71 | 747.38   | 374.19 | 746.40   | 373.70 | 5  |
| 11 | 1,376.75 | 688.88 | 1,358.74 | 679.88 | D | 663.36   | 332.18 | 646.33   | 323.67 | 645.35   | 323.18 | 4  |
| 12 | 1,562.83 | 781.92 | 1,544.82 | 772.92 | W | 548.33   | 274.67 | 531.30   | 266.16 |          |        | 3  |
| 13 | 1,633.87 | 817.44 | 1,615.86 | 808.43 | A | 362.25   | 181.63 | 345.23   | 173.12 |          |        | 2  |
| 14 |          |        |          |        | K | 291.21   | 146.11 | 274.19   | 137.60 |          |        | 1  |

Query 13431 Hit 1

MS/MS Fragmentation of **SPIAEAVFR**

Found in **sp|P24666|PPAC\_HUMAN**, Low molecular weight phosphotyrosine protein phosphatase OS=Homo sapiens GN=ACP1 PE=1 SV=3

Match to Query 13431: 1132.638from(567.3264,2+)

Title: 326: Sum of 2 scans in range 1408 (rt=37.9587, f=4, i=197) to 1409 (rt=37.9841, f=4, i=198)

[D:\lab212\membrane\Grace\Joyce\iTRAQ\_24\_2.raw]

Data File: Submitted from 20120508-1(merge) by Mascot Daemon on JOYCE-VAIO

Monoisotopic mass of neutral peptide Mr(calc): 1132.638

Variable modifications:

Ions Score: 42.58 Expect: 0.046

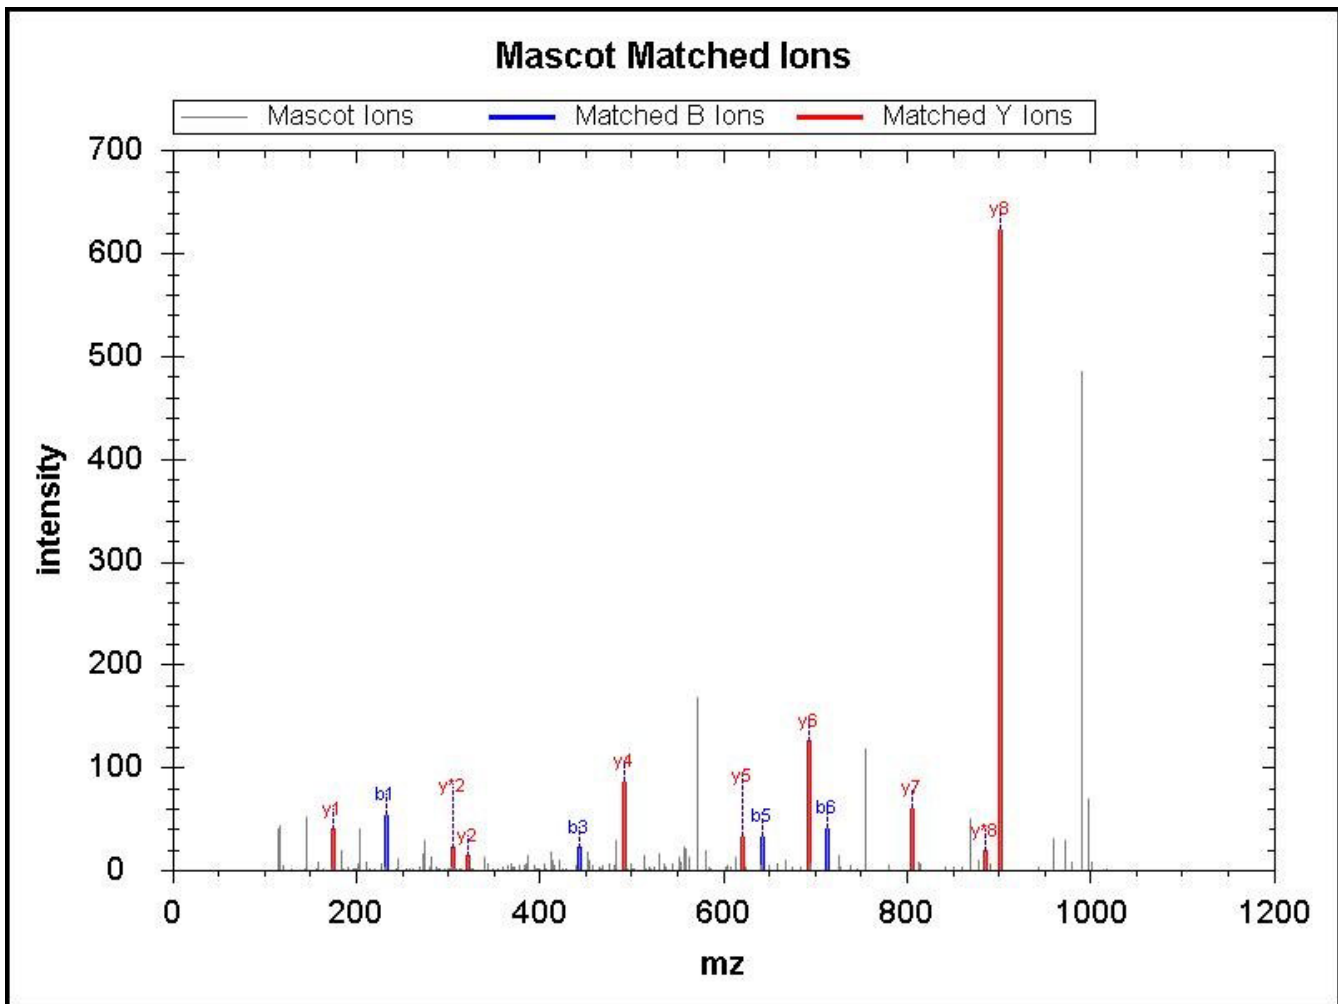

| No | b      | b++    | b0     | b0++   | Seq | y      | y++    | y*     | y*++   | y0     | y0++   | RevNo |
|----|--------|--------|--------|--------|-----|--------|--------|--------|--------|--------|--------|-------|
| 1  | 232.14 | 116.57 | 214.13 | 107.57 | S   |        |        |        |        |        |        | 9     |
| 2  | 329.19 | 165.10 | 311.18 | 156.10 | P   | 902.51 | 451.76 | 885.48 | 443.25 | 884.50 | 442.75 | 8     |

|   |        |        |        |        |   |        |        |        |        |        |        |   |
|---|--------|--------|--------|--------|---|--------|--------|--------|--------|--------|--------|---|
| 3 | 442.28 | 221.64 | 424.27 | 212.64 | I | 805.46 | 403.23 | 788.43 | 394.72 | 787.45 | 394.23 | 7 |
| 4 | 513.32 | 257.16 | 495.30 | 248.16 | A | 692.37 | 346.69 | 675.35 | 338.18 | 674.36 | 337.68 | 6 |
| 5 | 642.36 | 321.68 | 624.35 | 312.68 | E | 621.34 | 311.17 | 604.31 | 302.66 | 603.32 | 302.17 | 5 |
| 6 | 713.40 | 357.20 | 695.38 | 348.20 | A | 492.29 | 246.65 | 475.27 | 238.14 |        |        | 4 |
| 7 | 812.46 | 406.74 | 794.45 | 397.73 | V | 421.26 | 211.13 | 404.23 | 202.62 |        |        | 3 |
| 8 | 959.53 | 480.27 | 941.52 | 471.26 | F | 322.19 | 161.60 | 305.16 | 153.08 |        |        | 2 |
| 9 |        |        |        |        | R | 175.12 | 88.06  | 158.09 | 79.55  |        |        | 1 |

Query 63358 Hit 1

MS/MS Fragmentation of **IIEDLGVHFLQYVLK**

Found in **sp|Q5XG71|UTP20\_MOUSE**, Small subunit processome component 20 homolog OS=Mus musculus GN=Utp20 PE=2 SV=2

Match to Query 63358: 2074.209 from (692.4103, 3+)

Title: 1210: Sum of 2 scans in range 2877 (rt=73.2533, f=2, i=491) to 2878 (rt=73.2787, f=2, i=492)

[D:\lab212\membrane\GraceJoyce\iTRAQ\_36\_2.raw]

Data File: Submitted from 20120508-1(merge) by Mascot Daemon on JOYCE-VAIO

Monoisotopic mass of neutral peptide Mr(calc): 2074.209

Variable modifications:

K15 iTRAQ4plex (K)

Ions Score: 42.55 Expect: 0.021

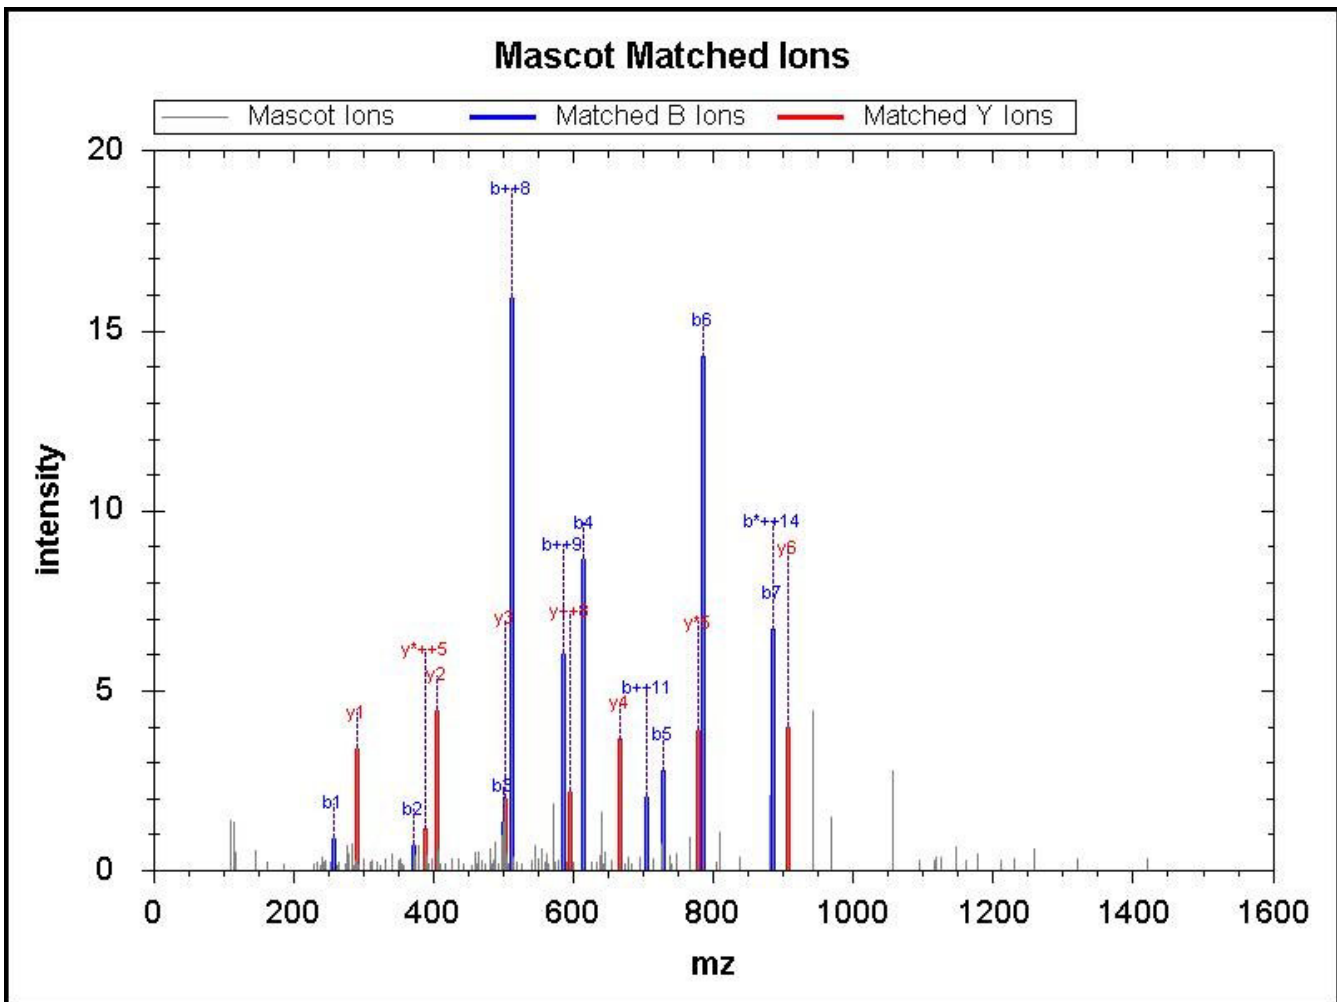

| No | b      | b++    | b* | b*++ | b0     | b0++   | Seq | y        | y++    | y*       | y*++   | y0       | y0++   | RevNo |
|----|--------|--------|----|------|--------|--------|-----|----------|--------|----------|--------|----------|--------|-------|
| 1  | 258.19 | 129.60 |    |      |        |        | I   |          |        |          |        |          |        | 15    |
| 2  | 371.28 | 186.14 |    |      |        |        | I   | 1,818.03 | 909.52 | 1,801.00 | 901.00 | 1,800.02 | 900.51 | 14    |
| 3  | 500.32 | 250.66 |    |      | 482.31 | 241.66 | E   | 1,704.94 | 852.98 | 1,687.92 | 844.46 | 1,686.93 | 843.97 | 13    |
| 4  | 615.35 | 308.18 |    |      | 597.34 | 299.17 | D   | 1,575.90 | 788.45 | 1,558.88 | 779.94 | 1,557.89 | 779.45 | 12    |
| 5  | 728.43 | 364.72 |    |      | 710.42 | 355.71 | L   | 1,460.87 | 730.94 | 1,443.85 | 722.43 |          |        | 11    |
| 6  | 785.45 | 393.23 |    |      | 767.44 | 384.22 | G   | 1,347.79 | 674.40 | 1,330.76 | 665.89 |          |        | 10    |

|    |          |        |          |        |          |        |   |          |        |          |        |  |  |   |
|----|----------|--------|----------|--------|----------|--------|---|----------|--------|----------|--------|--|--|---|
| 7  | 884.52   | 442.76 |          |        | 866.51   | 433.76 | V | 1,290.77 | 645.89 | 1,273.74 | 637.37 |  |  | 9 |
| 8  | 1,021.58 | 511.29 |          |        | 1,003.57 | 502.29 | H | 1,191.70 | 596.35 | 1,174.67 | 587.84 |  |  | 8 |
| 9  | 1,168.65 | 584.83 |          |        | 1,150.64 | 575.82 | F | 1,054.64 | 527.82 | 1,037.62 | 519.31 |  |  | 7 |
| 10 | 1,281.73 | 641.37 |          |        | 1,263.72 | 632.36 | L | 907.57   | 454.29 | 890.55   | 445.78 |  |  | 6 |
| 11 | 1,409.79 | 705.40 | 1,392.76 | 696.89 | 1,391.78 | 696.39 | Q | 794.49   | 397.75 | 777.46   | 389.23 |  |  | 5 |
| 12 | 1,572.85 | 786.93 | 1,555.83 | 778.42 | 1,554.84 | 777.93 | Y | 666.43   | 333.72 | 649.40   | 325.21 |  |  | 4 |
| 13 | 1,671.92 | 836.47 | 1,654.90 | 827.95 | 1,653.91 | 827.46 | V | 503.37   | 252.19 | 486.34   | 243.67 |  |  | 3 |
| 14 | 1,785.01 | 893.01 | 1,767.98 | 884.49 | 1,767.00 | 884.00 | L | 404.30   | 202.65 | 387.27   | 194.14 |  |  | 2 |
| 15 |          |        |          |        |          |        | K | 291.21   | 146.11 | 274.19   | 137.60 |  |  | 1 |

Query 33544 Hit 1

MS/MS Fragmentation of **HVGDLDGNVTADK**

Found in **sp|P00441|SODC\_HUMAN**, Superoxide dismutase [Cu-Zn] OS=Homo sapiens GN=SOD1 PE=1 SV=2

Match to Query 33544: 1512.816from(505.2793,3+)

Title: 260: Scan 635 (rt=23.9183, f=3, i=91) [D:\lab212\membrane\Grace\Joyce\iTRAQ\_45\_2.raw]

Data File: Submitted from 20120508-1(merge) by Mascot Daemon on JOYCE-VAIO

Monoisotopic mass of neutral peptide Mr(calc): 1512.816

Variable modifications:

K12 iTRAQ4plex (K)

Ions Score: 42.51 Expect: 0.043

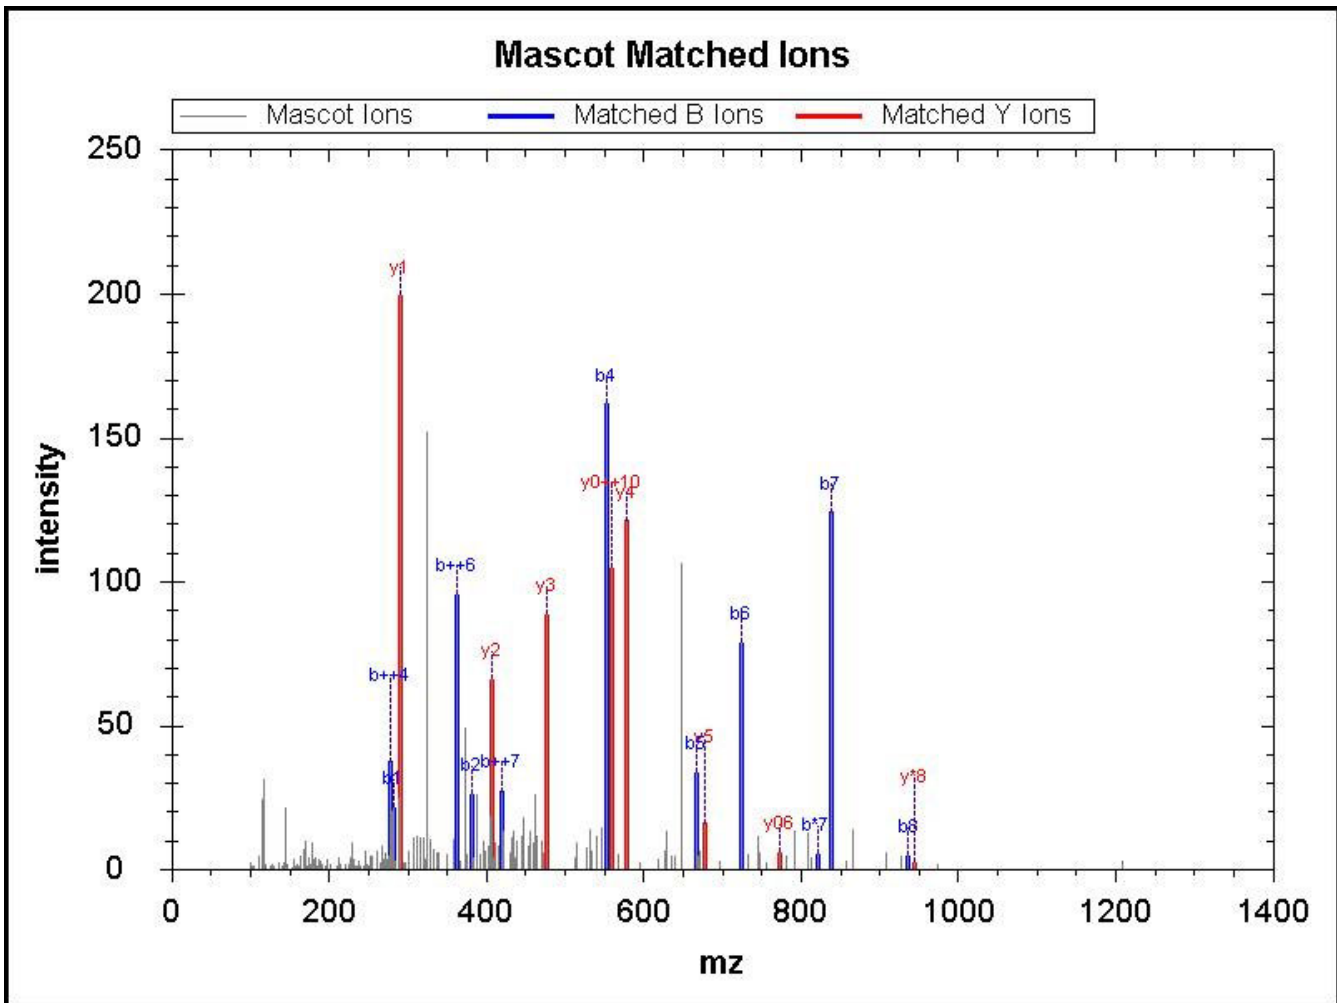

|    |          |        |          |        |          |        |   |        |        |        |        |        |        |   |
|----|----------|--------|----------|--------|----------|--------|---|--------|--------|--------|--------|--------|--------|---|
| 6  | 723.39   | 362.20 |          |        | 705.38   | 353.19 | G | 848.46 | 424.73 | 831.43 | 416.22 | 830.45 | 415.73 | 7 |
| 7  | 837.43   | 419.22 | 820.41   | 410.71 | 819.42   | 410.22 | N | 791.44 | 396.22 | 774.41 | 387.71 | 773.43 | 387.22 | 6 |
| 8  | 936.50   | 468.75 | 919.48   | 460.24 | 918.49   | 459.75 | V | 677.40 | 339.20 | 660.37 | 330.69 | 659.38 | 330.20 | 5 |
| 9  | 1,037.55 | 519.28 | 1,020.52 | 510.77 | 1,019.54 | 510.27 | T | 578.33 | 289.67 | 561.30 | 281.15 | 560.32 | 280.66 | 4 |
| 10 | 1,108.59 | 554.80 | 1,091.56 | 546.28 | 1,090.58 | 545.79 | A | 477.28 | 239.14 | 460.25 | 230.63 | 459.27 | 230.14 | 3 |
| 11 | 1,223.61 | 612.31 | 1,206.59 | 603.80 | 1,205.60 | 603.31 | D | 406.24 | 203.62 | 389.22 | 195.11 | 388.23 | 194.62 | 2 |
| 12 |          |        |          |        |          |        | K | 291.21 | 146.11 | 274.19 | 137.60 |        |        | 1 |

Query 80106 Hit 1

MS/MS Fragmentation of **EDLIIPHHHSFYDFIVTK**

Found in **sp|Q14320|FA50A\_HUMAN**, Protein FAM50A OS=Homo sapiens GN=FAM50A PE=1 SV=2

Match to Query 80106: 2498.319from(625.5871,4+)

Title: 765: Scan 1623 (rt=46.1862, f=3, i=250) [D:\lab212\membrane\Grace\Joyce\iTRAQ\_53\_2.raw]

Data File: Submitted from 20120508-1(merge) by Mascot Daemon on JOYCE-VAIO

Monoisotopic mass of neutral peptide Mr(calc): 2498.319

Variable modifications:

K18 iTRAQ4plex (K)

Ions Score: 42.51 Expect: 0.046

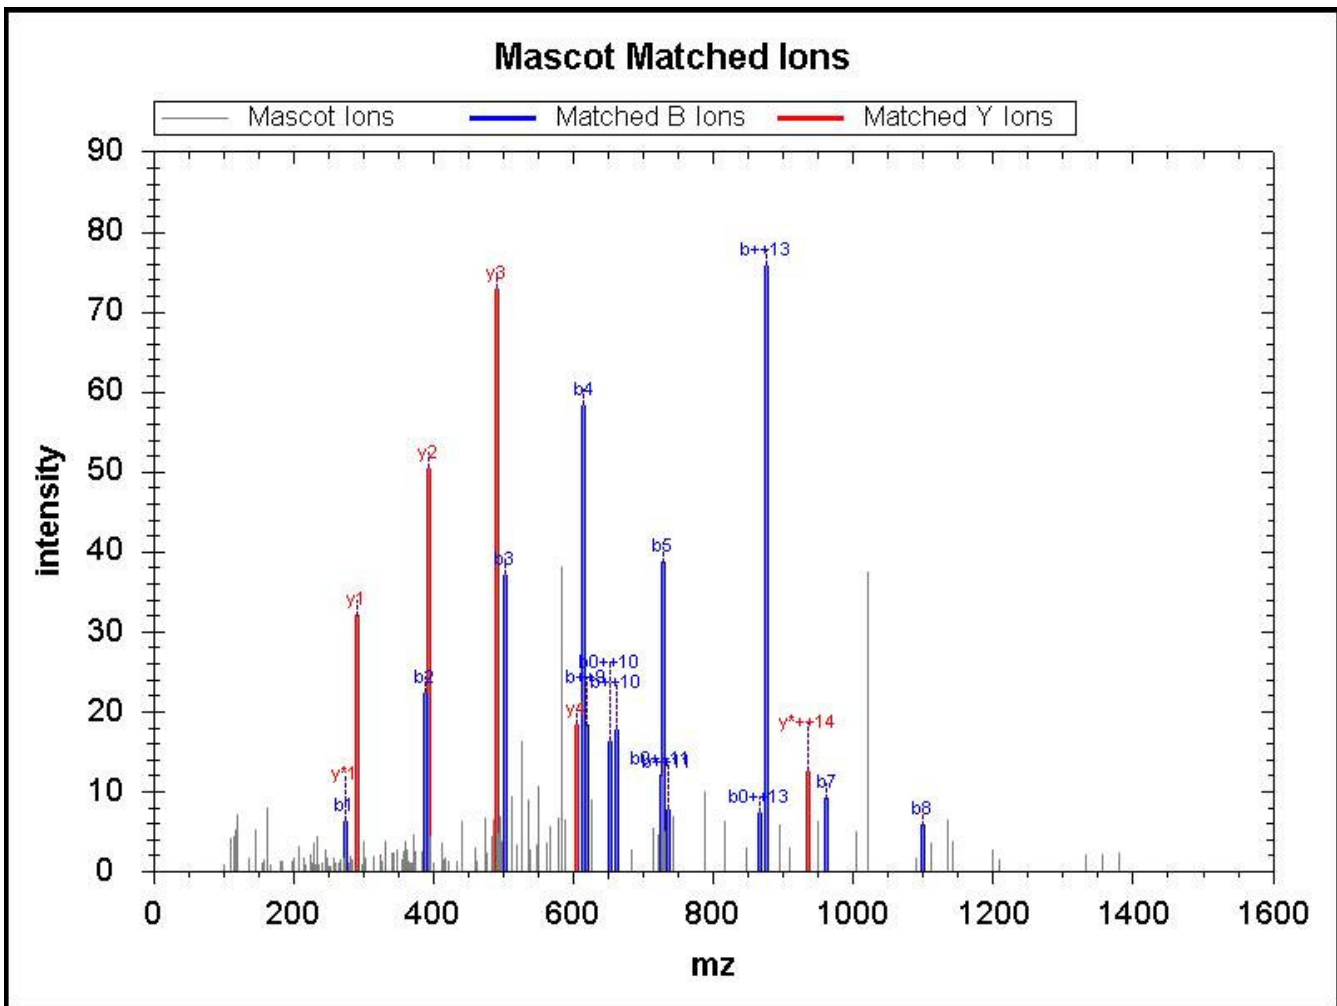

| No | b      | b++    | b0     | b0++   | Seq | y        | y++      | y*       | y*++     | y0       | y0++     | RevNo |
|----|--------|--------|--------|--------|-----|----------|----------|----------|----------|----------|----------|-------|
| 1  | 274.15 | 137.58 | 256.14 | 128.57 | E   |          |          |          |          |          |          | 18    |
| 2  | 389.18 | 195.09 | 371.17 | 186.09 | D   | 2,226.18 | 1,113.60 | 2,209.16 | 1,105.08 | 2,208.17 | 1,104.59 | 17    |
| 3  | 502.26 | 251.64 | 484.25 | 242.63 | L   | 2,111.16 | 1,056.08 | 2,094.13 | 1,047.57 | 2,093.15 | 1,047.08 | 16    |
| 4  | 615.35 | 308.18 | 597.34 | 299.17 | I   | 1,998.07 | 999.54   | 1,981.05 | 991.03   | 1,980.06 | 990.53   | 15    |
| 5  | 728.43 | 364.72 | 710.42 | 355.71 | I   | 1,884.99 | 943.00   | 1,867.96 | 934.48   | 1,866.98 | 933.99   | 14    |
| 6  | 825.48 | 413.25 | 807.47 | 404.24 | P   | 1,771.90 | 886.46   | 1,754.88 | 877.94   | 1,753.89 | 877.45   | 13    |
| 7  | 962.54 | 481.77 | 944.53 | 472.77 | H   | 1,674.85 | 837.93   | 1,657.82 | 829.42   | 1,656.84 | 828.92   | 12    |

|    |          |          |          |          |   |          |        |          |        |          |        |    |
|----|----------|----------|----------|----------|---|----------|--------|----------|--------|----------|--------|----|
| 8  | 1,099.60 | 550.30   | 1,081.59 | 541.30   | H | 1,537.79 | 769.40 | 1,520.77 | 760.89 | 1,519.78 | 760.39 | 11 |
| 9  | 1,236.66 | 618.83   | 1,218.65 | 609.83   | H | 1,400.73 | 700.87 | 1,383.71 | 692.36 | 1,382.72 | 691.86 | 10 |
| 10 | 1,323.69 | 662.35   | 1,305.68 | 653.34   | S | 1,263.67 | 632.34 | 1,246.65 | 623.83 | 1,245.66 | 623.34 | 9  |
| 11 | 1,470.76 | 735.88   | 1,452.75 | 726.88   | F | 1,176.64 | 588.82 | 1,159.62 | 580.31 | 1,158.63 | 579.82 | 8  |
| 12 | 1,633.82 | 817.42   | 1,615.81 | 808.41   | Y | 1,029.57 | 515.29 | 1,012.55 | 506.78 | 1,011.56 | 506.29 | 7  |
| 13 | 1,748.85 | 874.93   | 1,730.84 | 865.92   | D | 866.51   | 433.76 | 849.48   | 425.25 | 848.50   | 424.75 | 6  |
| 14 | 1,895.92 | 948.46   | 1,877.91 | 939.46   | F | 751.48   | 376.25 | 734.46   | 367.73 | 733.47   | 367.24 | 5  |
| 15 | 2,009.00 | 1,005.01 | 1,990.99 | 996.00   | I | 604.41   | 302.71 | 587.39   | 294.20 | 586.40   | 293.71 | 4  |
| 16 | 2,108.07 | 1,054.54 | 2,090.06 | 1,045.53 | V | 491.33   | 246.17 | 474.30   | 237.66 | 473.32   | 237.16 | 3  |
| 17 | 2,209.12 | 1,105.06 | 2,191.11 | 1,096.06 | T | 392.26   | 196.63 | 375.24   | 188.12 | 374.25   | 187.63 | 2  |
| 18 |          |          |          |          | K | 291.21   | 146.11 | 274.19   | 137.60 |          |        | 1  |

Query 34688 Hit 1

MS/MS Fragmentation of **ELVIPLIQNGHR**

Found in **sp|Q92917|GPKOW\_HUMAN**, G patch domain and KOW motifs-containing protein OS=Homo sapiens GN=GPKOW PE=1 SV=2

Match to Query 34688: 1532.875from(511.9655,3+)

Title: 671: Scan 1499 (rt=43.2919, f=3, i=230) [D:\lab212\membrane\Grace\Joyce\iTRAQ\_34\_2.raw]

Data File: Submitted from 20120508-1(merge) by Mascot Daemon on JOYCE-VAIO

Monoisotopic mass of neutral peptide Mr(calc): 1532.875

Variable modifications:

N9 :Deamidated (NQ)

Ions Score: 42.5 Expect: 0.040

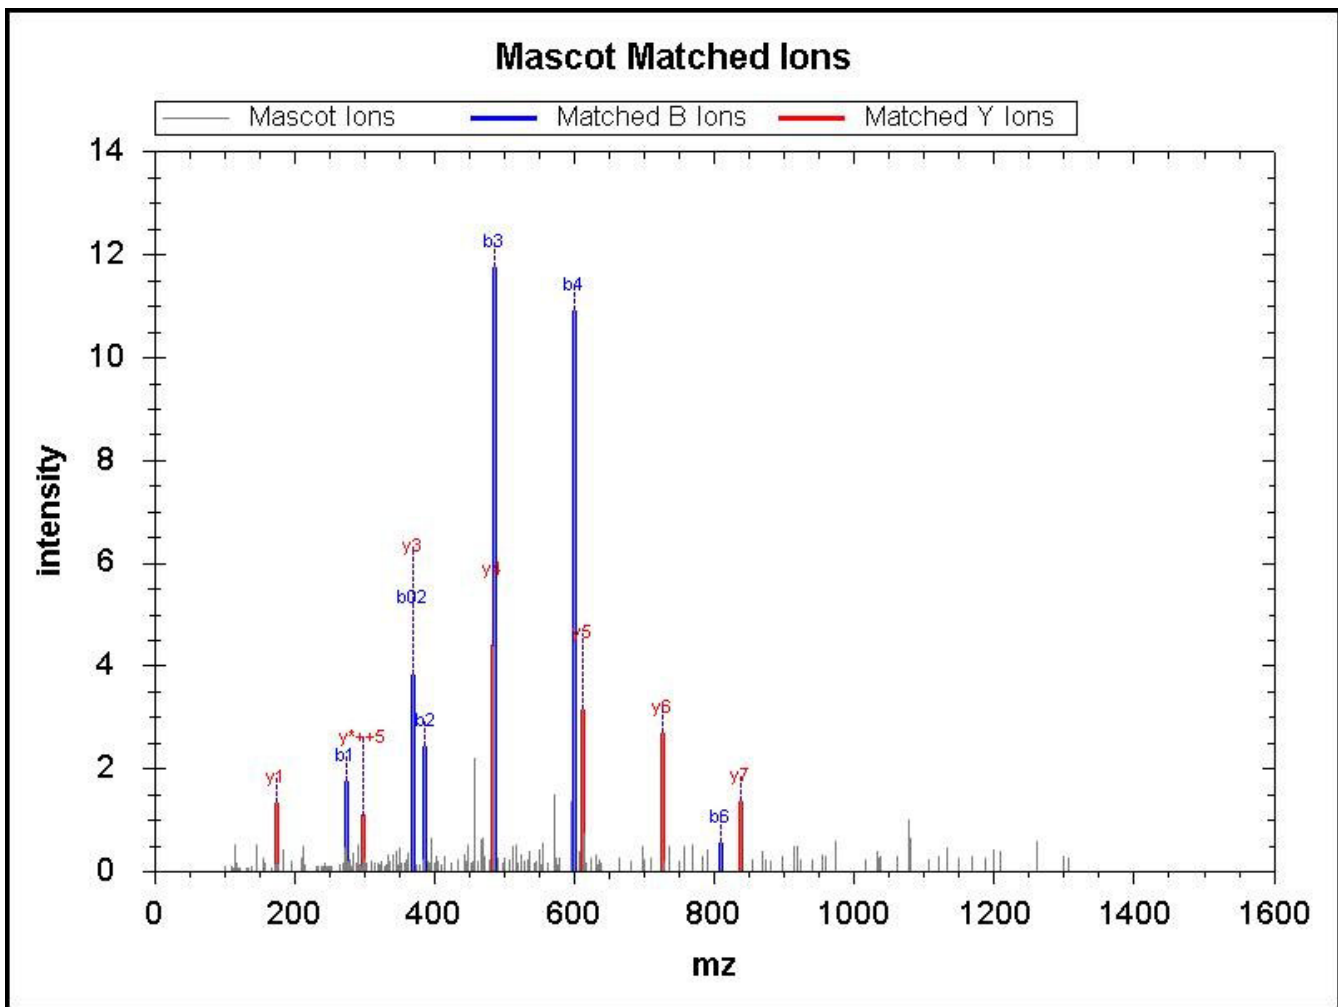

| No | b      | b++    | b* | b*++ | b0     | b0++   | Seq | y        | y++    | y*       | y*++   | RevNo |
|----|--------|--------|----|------|--------|--------|-----|----------|--------|----------|--------|-------|
| 1  | 274.15 | 137.58 |    |      | 256.14 | 128.57 | E   |          |        |          |        | 12    |
| 2  | 387.24 | 194.12 |    |      | 369.23 | 185.12 | L   | 1,260.74 | 630.87 | 1,243.72 | 622.36 | 11    |

|    |          |        |          |        |          |        |   |          |        |          |        |    |
|----|----------|--------|----------|--------|----------|--------|---|----------|--------|----------|--------|----|
| 3  | 486.30   | 243.66 |          |        | 468.29   | 234.65 | V | 1,147.66 | 574.33 | 1,130.63 | 565.82 | 10 |
| 4  | 599.39   | 300.20 |          |        | 581.38   | 291.19 | I | 1,048.59 | 524.80 | 1,031.56 | 516.29 | 9  |
| 5  | 696.44   | 348.72 |          |        | 678.43   | 339.72 | P | 935.51   | 468.26 | 918.48   | 459.74 | 8  |
| 6  | 809.53   | 405.27 |          |        | 791.51   | 396.26 | L | 838.45   | 419.73 | 821.43   | 411.22 | 7  |
| 7  | 922.61   | 461.81 |          |        | 904.60   | 452.80 | I | 725.37   | 363.19 | 708.34   | 354.67 | 6  |
| 8  | 1,050.67 | 525.84 | 1,033.64 | 517.32 | 1,032.66 | 516.83 | Q | 612.28   | 306.65 | 595.26   | 298.13 | 5  |
| 9  | 1,165.69 | 583.35 | 1,148.67 | 574.84 | 1,147.68 | 574.35 | N | 484.23   | 242.62 | 467.20   | 234.10 | 4  |
| 10 | 1,222.72 | 611.86 | 1,205.69 | 603.35 | 1,204.71 | 602.86 | G | 369.20   | 185.10 | 352.17   | 176.59 | 3  |
| 11 | 1,359.78 | 680.39 | 1,342.75 | 671.88 | 1,341.76 | 671.39 | H | 312.18   | 156.59 | 295.15   | 148.08 | 2  |
| 12 |          |        |          |        |          |        | R | 175.12   | 88.06  | 158.09   | 79.55  | 1  |

Query 26847 Hit 1

MS/MS Fragmentation of **ILMLGLDAAGK**

Found in [sp|P62330|ARF6\\_HUMAN](#), ADP-ribosylation factor 6 OS=Homo sapiens GN=ARF6 PE=1 SV=2

Match to Query 26847: 1388.832from(695.4232,2+)

Title: 744: Scan 1689 (rt=47.3927, f=2, i=263) [D:\lab212\membrane\Grace\Joyce\iTRAQ\_28\_1\_327.raw]

Data File: Submitted from 20120508-1(merge) by Mascot Daemon on JOYCE-VAIO

Monoisotopic mass of neutral peptide Mr(calc): 1388.832

Variable modifications:

K11 iTRAQ4plex (K)

Ions Score: 42.47 Expect: 0.032

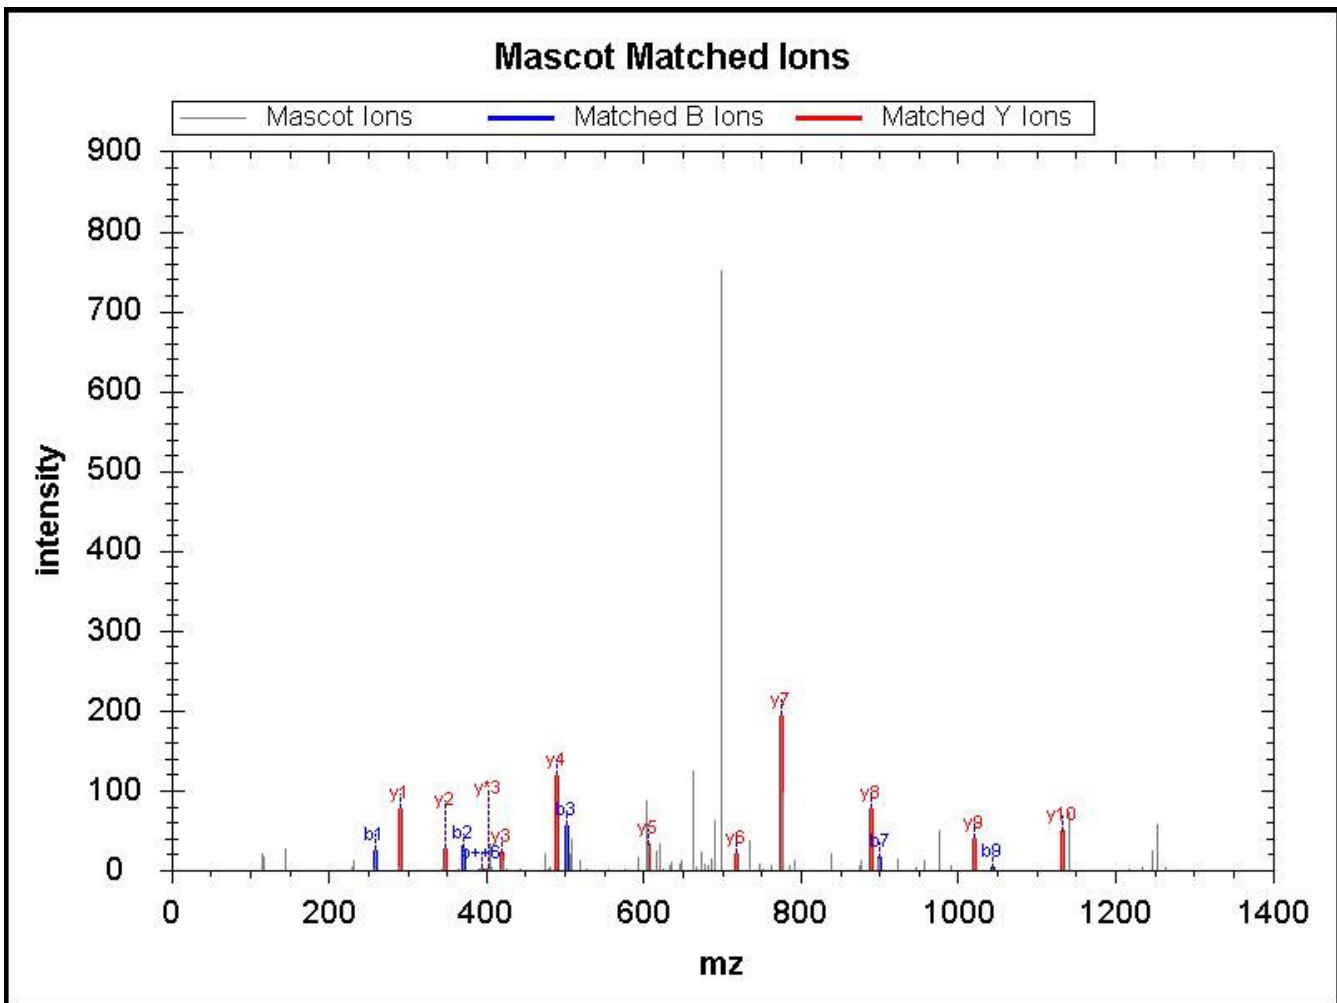

| No | b      | b++    | b0 | b0++ | Seq | y        | y++    | y*       | y*++   | y0       | y0++   | RevNo |
|----|--------|--------|----|------|-----|----------|--------|----------|--------|----------|--------|-------|
| 1  | 258.19 | 129.60 |    |      | I   |          |        |          |        |          |        | 11    |
| 2  | 371.28 | 186.14 |    |      | L   | 1,132.65 | 566.83 | 1,115.63 | 558.32 | 1,114.64 | 557.82 | 10    |
| 3  | 502.32 | 251.66 |    |      | M   | 1,019.57 | 510.29 | 1,002.54 | 501.77 | 1,001.56 | 501.28 | 9     |
| 4  | 615.40 | 308.20 |    |      | L   | 888.53   | 444.77 | 871.50   | 436.25 | 870.52   | 435.76 | 8     |



|    |          |        |          |        |   |        |        |        |        |        |        |   |
|----|----------|--------|----------|--------|---|--------|--------|--------|--------|--------|--------|---|
| 5  | 672.42   | 336.72 |          |        | G | 775.44 | 388.23 | 758.42 | 379.71 | 757.43 | 379.22 | 7 |
| 6  | 785.51   | 393.26 |          |        | L | 718.42 | 359.71 | 701.39 | 351.20 | 700.41 | 350.71 | 6 |
| 7  | 900.53   | 450.77 | 882.52   | 441.77 | D | 605.34 | 303.17 | 588.31 | 294.66 | 587.33 | 294.17 | 5 |
| 8  | 971.57   | 486.29 | 953.56   | 477.28 | A | 490.31 | 245.66 | 473.28 | 237.15 |        |        | 4 |
| 9  | 1,042.61 | 521.81 | 1,024.60 | 512.80 | A | 419.27 | 210.14 | 402.25 | 201.63 |        |        | 3 |
| 10 | 1,099.63 | 550.32 | 1,081.62 | 541.31 | G | 348.24 | 174.62 | 331.21 | 166.11 |        |        | 2 |
| 11 |          |        |          |        | K | 291.21 | 146.11 | 274.19 | 137.60 |        |        | 1 |

Query 74034 Hit 1

MS/MS Fragmentation of **LEMDAQHIKDEFFHER**

Found in **sp|Q81WJ2|GCC2\_HUMAN**, GRIP and coiled-coil domain-containing protein 2 OS=Homo sapiens GN=GCC2 PE=1 SV=4

Match to Query 74034: 2332.157from(584.0466,4+)

Title: 832: Scan 1776 (rt=49.662, f=3, i=276) [D:\lab212\membrane\Grace\Joyce\54-2.raw]

Data File: Submitted from 20120508-1(merge) by Mascot Daemon on JOYCE-VAIO

Monoisotopic mass of neutral peptide Mr(calc): 2332.157

Variable modifications:

K9 iTRAQ4plex (K)

Ions Score: 42.45 Expect: 0.054

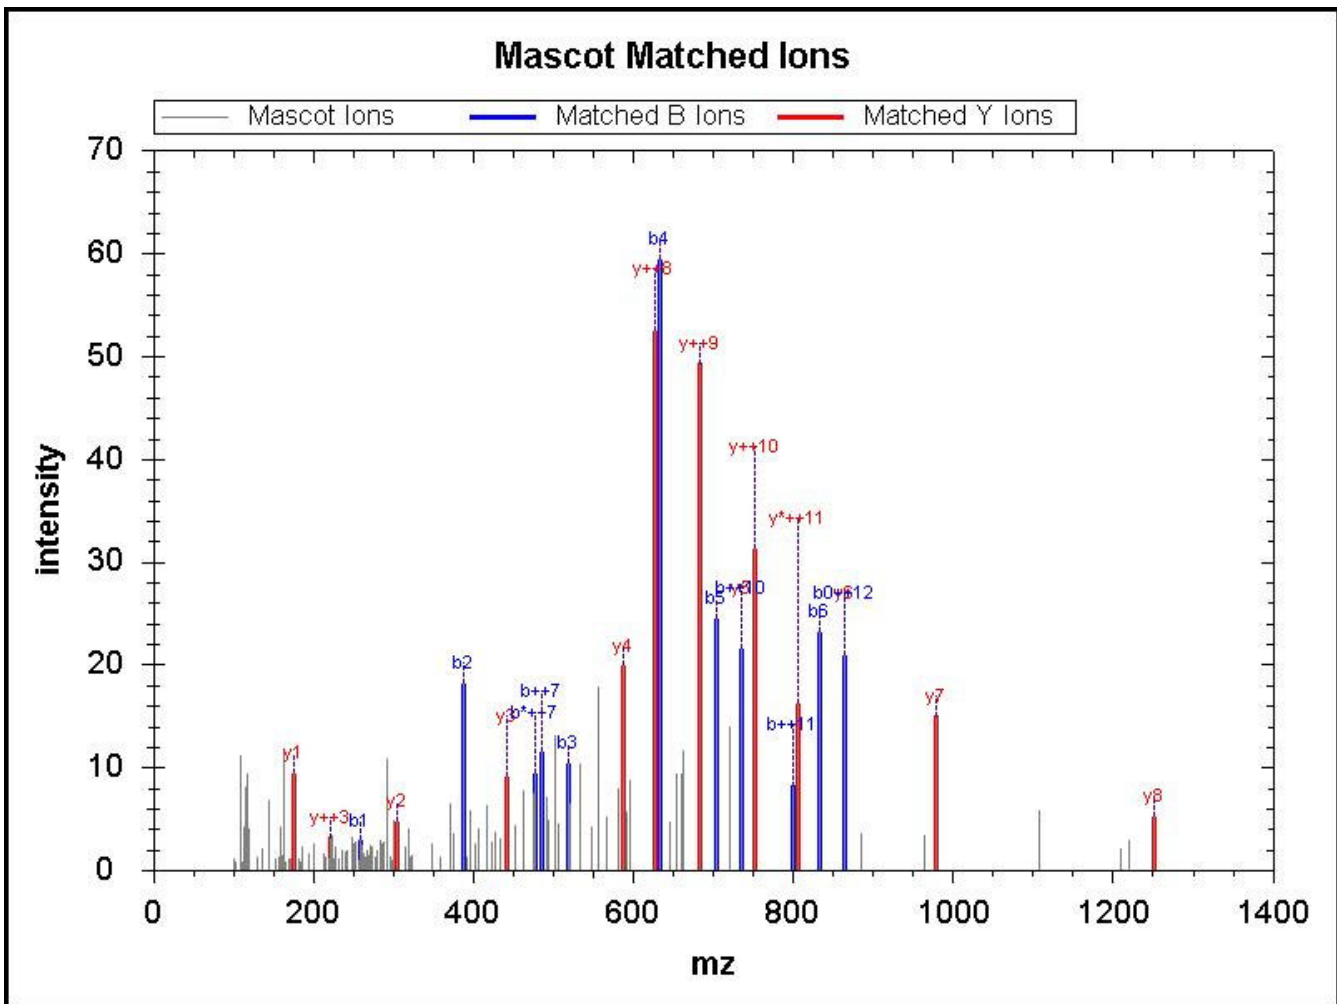

| No | b      | b++    | b*     | b***   | b0     | b0++   | Seq | y        | y++      | y*       | y***     | y0       | y0++     | RevNo |
|----|--------|--------|--------|--------|--------|--------|-----|----------|----------|----------|----------|----------|----------|-------|
| 1  | 258.19 | 129.60 |        |        |        |        | L   |          |          |          |          |          |          | 16    |
| 2  | 387.24 | 194.12 |        |        | 369.23 | 185.12 | E   | 2,075.97 | 1,038.49 | 2,058.95 | 1,029.98 | 2,057.96 | 1,029.48 | 15    |
| 3  | 518.28 | 259.64 |        |        | 500.27 | 250.64 | M   | 1,946.93 | 973.97   | 1,929.90 | 965.46   | 1,928.92 | 964.96   | 14    |
| 4  | 633.30 | 317.16 |        |        | 615.29 | 308.15 | D   | 1,815.89 | 908.45   | 1,798.86 | 899.94   | 1,797.88 | 899.44   | 13    |
| 5  | 704.34 | 352.67 |        |        | 686.33 | 343.67 | A   | 1,700.86 | 850.93   | 1,683.84 | 842.42   | 1,682.85 | 841.93   | 12    |
| 6  | 832.40 | 416.70 | 815.37 | 408.19 | 814.39 | 407.70 | Q   | 1,629.83 | 815.42   | 1,612.80 | 806.90   | 1,611.81 | 806.41   | 11    |
| 7  | 969.46 | 485.23 | 952.43 | 476.72 | 951.45 | 476.23 | H   | 1,501.77 | 751.39   | 1,484.74 | 742.87   | 1,483.76 | 742.38   | 10    |

|    |          |          |          |          |          |          |   |          |        |          |        |          |        |   |
|----|----------|----------|----------|----------|----------|----------|---|----------|--------|----------|--------|----------|--------|---|
| 8  | 1,082.54 | 541.77   | 1,065.52 | 533.26   | 1,064.53 | 532.77   | I | 1,364.71 | 682.86 | 1,347.68 | 674.34 | 1,346.70 | 673.85 | 9 |
| 9  | 1,354.74 | 677.87   | 1,337.71 | 669.36   | 1,336.73 | 668.87   | K | 1,251.62 | 626.32 | 1,234.60 | 617.80 | 1,233.61 | 617.31 | 8 |
| 10 | 1,469.77 | 735.39   | 1,452.74 | 726.87   | 1,451.76 | 726.38   | D | 979.43   | 490.22 | 962.40   | 481.70 | 961.42   | 481.21 | 7 |
| 11 | 1,598.81 | 799.91   | 1,581.78 | 791.39   | 1,580.80 | 790.90   | E | 864.40   | 432.70 | 847.37   | 424.19 | 846.39   | 423.70 | 6 |
| 12 | 1,745.88 | 873.44   | 1,728.85 | 864.93   | 1,727.87 | 864.44   | F | 735.36   | 368.18 | 718.33   | 359.67 | 717.35   | 359.18 | 5 |
| 13 | 1,892.95 | 946.98   | 1,875.92 | 938.46   | 1,874.93 | 937.97   | F | 588.29   | 294.65 | 571.26   | 286.13 | 570.28   | 285.64 | 4 |
| 14 | 2,030.00 | 1,015.51 | 2,012.98 | 1,006.99 | 2,011.99 | 1,006.50 | H | 441.22   | 221.11 | 424.19   | 212.60 | 423.21   | 212.11 | 3 |
| 15 | 2,159.05 | 1,080.03 | 2,142.02 | 1,071.51 | 2,141.04 | 1,071.02 | E | 304.16   | 152.58 | 287.13   | 144.07 | 286.15   | 143.58 | 2 |
| 16 |          |          |          |          |          |          | R | 175.12   | 88.06  | 158.09   | 79.55  |          |        | 1 |

Query 7850 Hit 1

MS/MS Fragmentation of **SGLTFLPK**

Found in **sp|Q75T13|PGAP1\_HUMAN**, GPI inositol-deacylase OS=Homo sapiens GN=PGAP1 PE=2 SV=1

Match to Query 7850: 1005.616from(503.8153,2+)

Title: 357: Sum of 2 scans in range 920 (rt=29.8845, f=4, i=237) to 921 (rt=29.9099, f=4, i=238)

[D:\lab212\membrane\GraceJoyce\iTRAQ\_30\_1.raw]

Data File: Submitted from 20120508-1(merge) by Mascot Daemon on JOYCE-VAIO

Monoisotopic mass of neutral peptide Mr(calc): 1005.616

Variable modifications:

K8 iTRAQ4plex (K)

Ions Score: 42.38 Expect: 0.041

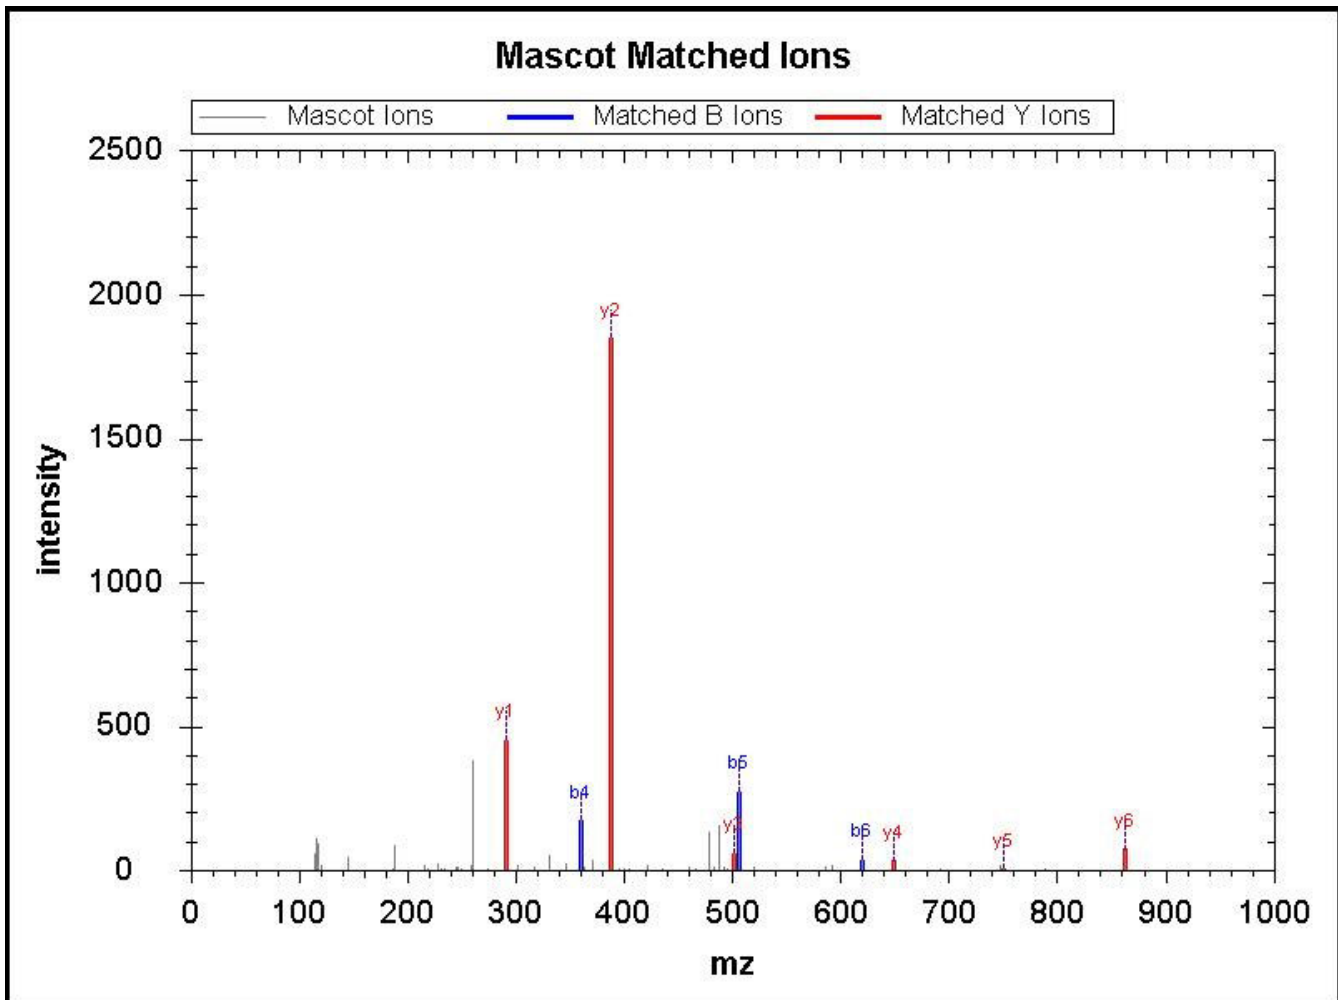

| No | b      | b++    | b0     | b0++   | Seq | y      | y++    | y*     | y*++   | y0     | y0++   | RevNo |
|----|--------|--------|--------|--------|-----|--------|--------|--------|--------|--------|--------|-------|
| 1  | 88.04  | 44.52  | 70.03  | 35.52  | S   |        |        |        |        |        |        | 8     |
| 2  | 145.06 | 73.03  | 127.05 | 64.03  | G   | 919.57 | 460.29 | 902.55 | 451.78 | 901.56 | 451.29 | 7     |
| 3  | 258.14 | 129.58 | 240.13 | 120.57 | L   | 862.55 | 431.78 | 845.53 | 423.27 | 844.54 | 422.77 | 6     |
| 4  | 359.19 | 180.10 | 341.18 | 171.09 | T   | 749.47 | 375.24 | 732.44 | 366.72 | 731.46 | 366.23 | 5     |

|   |        |        |        |        |   |        |        |        |        |  |  |   |
|---|--------|--------|--------|--------|---|--------|--------|--------|--------|--|--|---|
| 5 | 506.26 | 253.63 | 488.25 | 244.63 | F | 648.42 | 324.71 | 631.39 | 316.20 |  |  | 4 |
| 6 | 619.34 | 310.18 | 601.33 | 301.17 | L | 501.35 | 251.18 | 484.33 | 242.67 |  |  | 3 |
| 7 | 716.40 | 358.70 | 698.39 | 349.70 | P | 388.27 | 194.64 | 371.24 | 186.12 |  |  | 2 |
| 8 |        |        |        |        | K | 291.21 | 146.11 | 274.19 | 137.60 |  |  | 1 |

Query 5983 Hit 1

MS/MS Fragmentation of **G**SF**G**T**V**L**K**

Found in **sp|Q96LW2|SG494\_HUMAN**, Uncharacterized serine/threonine-protein kinase SgK494 OS=Homo sapiens GN=SGK494 PE=2 SV=1

Match to Query 5983: 951.6027from(476.8087,2+)

Title: 334: Scan 819 (rt=27.8083, f=2, i=124) [D:\lab212\membrane\Grace\Joyce\iTRAQ\_31\_1.raw]

Data File: Submitted from 20120508-1(merge) by Mascot Daemon on JOYCE-VAIO

Monoisotopic mass of neutral peptide Mr(calc): 951.6027

Variable modifications:

K8 :iTRAQ4plex (K)

Ions Score: 42.36 Expect: 0.023

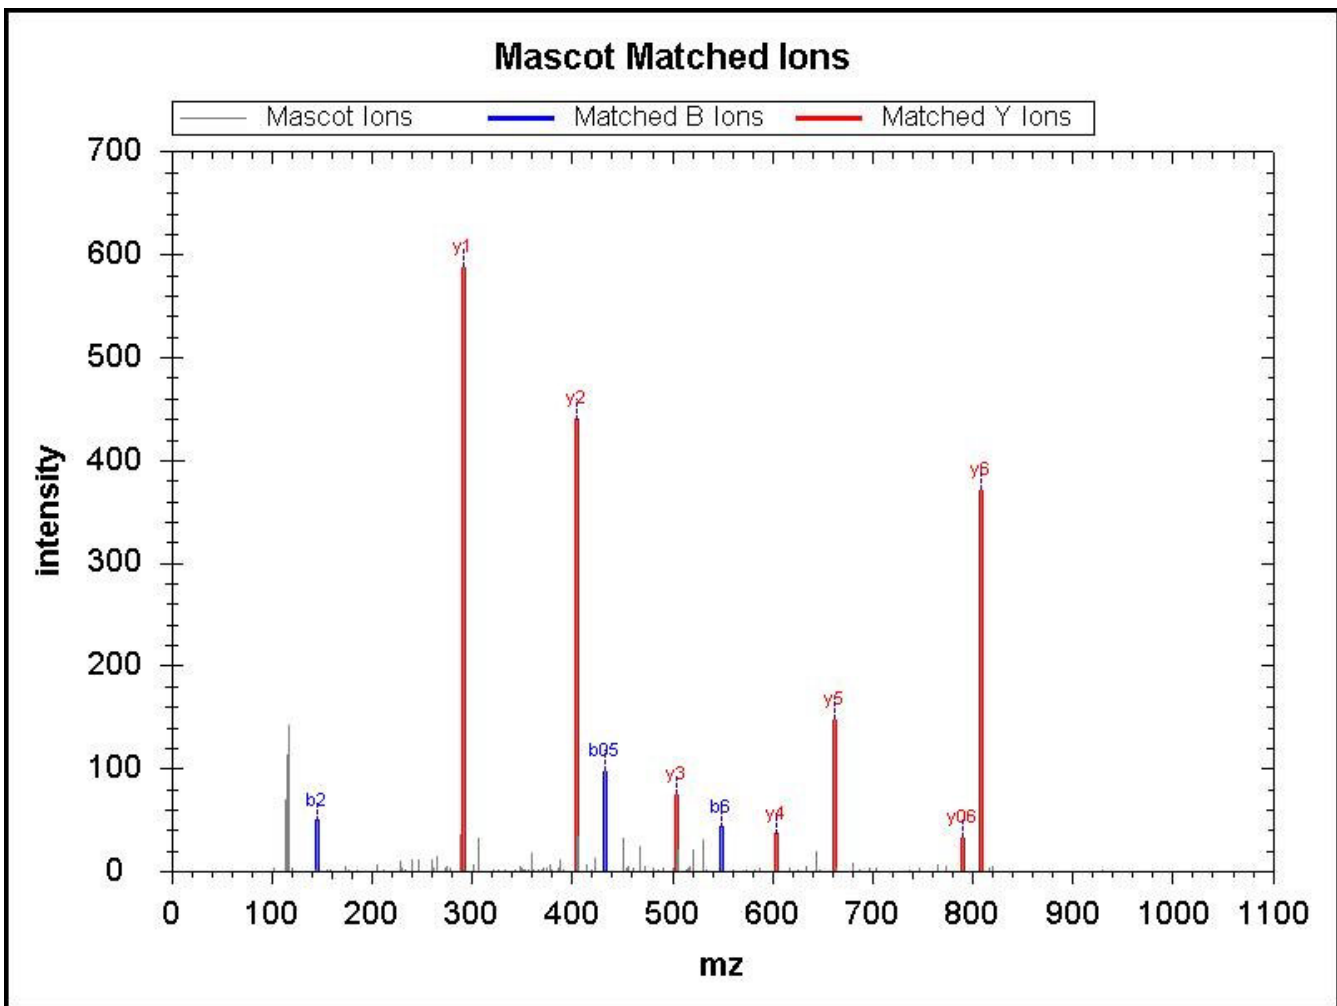

| No | b      | b++    | b0     | b0++   | Seq | y      | y++    | y*     | y*++   | y0     | y0++   | RevNo |
|----|--------|--------|--------|--------|-----|--------|--------|--------|--------|--------|--------|-------|
| 1  | 58.03  | 29.52  |        |        | G   |        |        |        |        |        |        | 8     |
| 2  | 145.06 | 73.03  | 127.05 | 64.03  | S   | 895.54 | 448.27 | 878.51 | 439.76 | 877.53 | 439.27 | 7     |
| 3  | 292.13 | 146.57 | 274.12 | 137.56 | F   | 808.50 | 404.76 | 791.48 | 396.24 | 790.49 | 395.75 | 6     |
| 4  | 349.15 | 175.08 | 331.14 | 166.07 | G   | 661.44 | 331.22 | 644.41 | 322.71 | 643.43 | 322.22 | 5     |
| 5  | 450.20 | 225.60 | 432.19 | 216.60 | T   | 604.41 | 302.71 | 587.39 | 294.20 | 586.40 | 293.71 | 4     |
| 6  | 549.27 | 275.14 | 531.26 | 266.13 | V   | 503.37 | 252.19 | 486.34 | 243.67 |        |        | 3     |
| 7  | 662.35 | 331.68 | 644.34 | 322.67 | L   | 404.30 | 202.65 | 387.27 | 194.14 |        |        | 2     |
| 8  |        |        |        |        | K   | 291.21 | 146.11 | 274.19 | 137.60 |        |        | 1     |

Query 43911 Hit 1

MS/MS Fragmentation of **DGNLGLAVGEVGMDSK**

Found in **sp|Q81VF2|AHNK2\_HUMAN**, Protein AHNK2 OS=Homo sapiens GN=AHNK2 PE=1 SV=2

Match to Query 43911: 1705.877 from (853.9457,2+)

Title: 127: Scan 1211 (rt=33.5136, f=3, i=64) [D:\lab212\membrane\Grace\Joyce\iTRAQ\_19\_2\_330.raw]

Data File: Submitted from 20120508-1(merge) by Mascot Daemon on JOYCE-VAIO

Monoisotopic mass of neutral peptide Mr(calc): 1705.877

Variable modifications:

N3 :Deamidated (NQ)

Ions Score: 42.36 Expect: 0.053

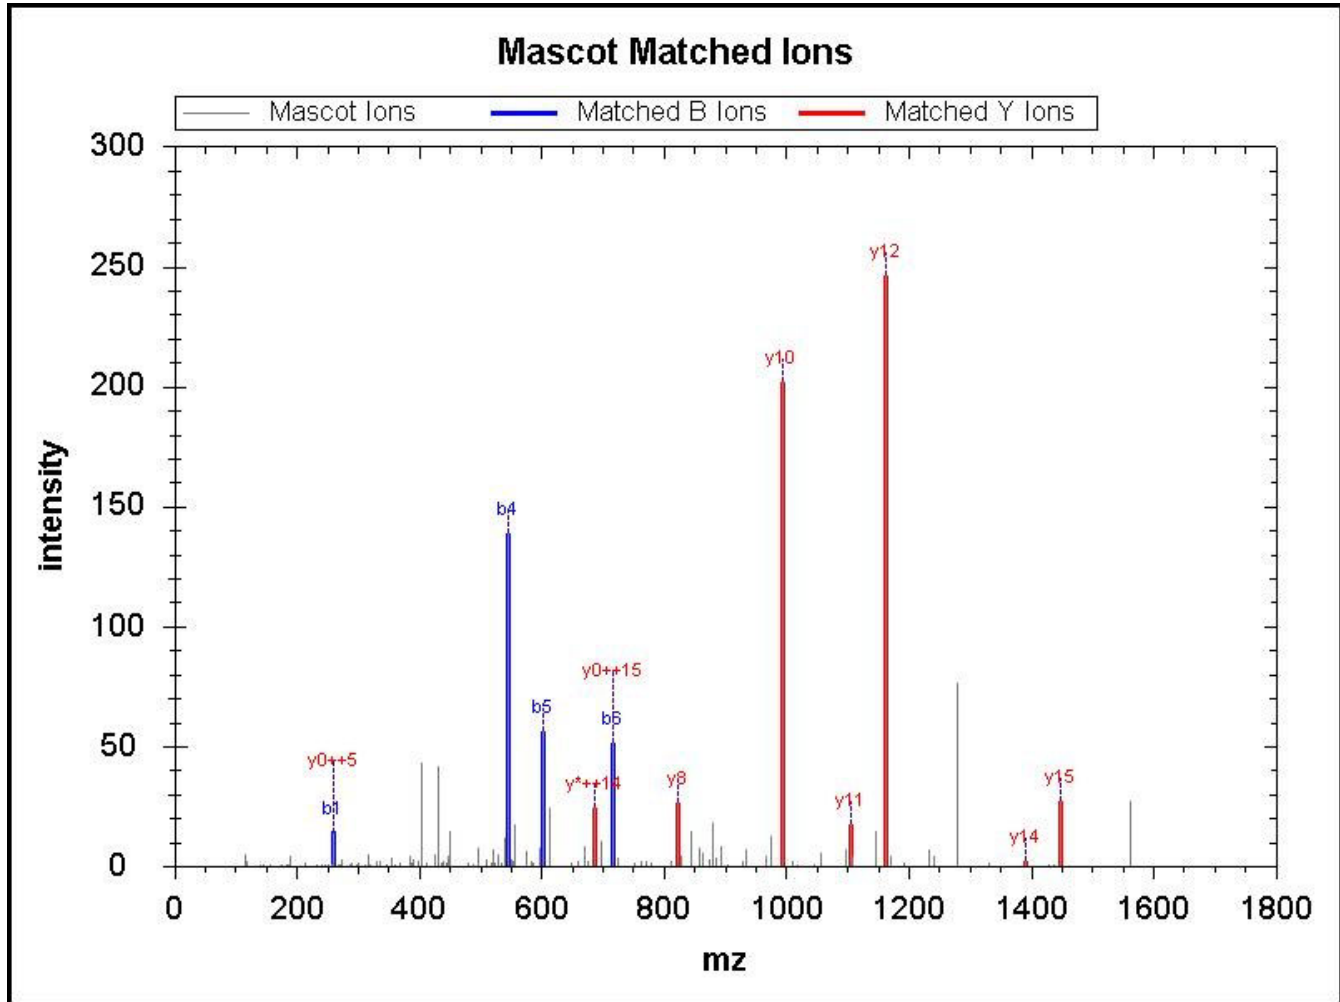

| No | b        | b++    | b*       | b*++   | b0       | b0++   | Seq | y        | y++    | y*       | y*++   | y0       | y0++   | RevNo |
|----|----------|--------|----------|--------|----------|--------|-----|----------|--------|----------|--------|----------|--------|-------|
| 1  | 260.14   | 130.57 |          |        | 242.13   | 121.57 | D   |          |        |          |        |          |        | 16    |
| 2  | 317.16   | 159.08 |          |        | 299.15   | 150.08 | G   | 1,447.71 | 724.36 | 1,430.68 | 715.85 | 1,429.70 | 715.35 | 15    |
| 3  | 432.18   | 216.60 | 415.16   | 208.08 | 414.17   | 207.59 | N   | 1,390.69 | 695.85 | 1,373.66 | 687.33 | 1,372.68 | 686.84 | 14    |
| 4  | 545.27   | 273.14 | 528.24   | 264.62 | 527.26   | 264.13 | L   | 1,275.66 | 638.33 | 1,258.63 | 629.82 | 1,257.65 | 629.33 | 13    |
| 5  | 602.29   | 301.65 | 585.26   | 293.14 | 584.28   | 292.64 | G   | 1,162.58 | 581.79 | 1,145.55 | 573.28 | 1,144.57 | 572.79 | 12    |
| 6  | 715.37   | 358.19 | 698.35   | 349.68 | 697.36   | 349.19 | L   | 1,105.56 | 553.28 | 1,088.53 | 544.77 | 1,087.55 | 544.28 | 11    |
| 7  | 786.41   | 393.71 | 769.38   | 385.20 | 768.40   | 384.70 | A   | 992.47   | 496.74 | 975.45   | 488.23 | 974.46   | 487.73 | 10    |
| 8  | 885.48   | 443.24 | 868.45   | 434.73 | 867.47   | 434.24 | V   | 921.43   | 461.22 | 904.41   | 452.71 | 903.42   | 452.22 | 9     |
| 9  | 942.50   | 471.75 | 925.47   | 463.24 | 924.49   | 462.75 | G   | 822.37   | 411.69 | 805.34   | 403.17 | 804.36   | 402.68 | 8     |
| 10 | 1,071.54 | 536.28 | 1,054.52 | 527.76 | 1,053.53 | 527.27 | E   | 765.34   | 383.18 | 748.32   | 374.66 | 747.33   | 374.17 | 7     |
| 11 | 1,170.61 | 585.81 | 1,153.59 | 577.30 | 1,152.60 | 576.80 | V   | 636.30   | 318.65 | 619.28   | 310.14 | 618.29   | 309.65 | 6     |
| 12 | 1,227.63 | 614.32 | 1,210.61 | 605.81 | 1,209.62 | 605.32 | G   | 537.23   | 269.12 | 520.21   | 260.61 | 519.22   | 260.12 | 5     |
| 13 | 1,358.67 | 679.84 | 1,341.65 | 671.33 | 1,340.66 | 670.84 | M   | 480.21   | 240.61 | 463.19   | 232.10 | 462.20   | 231.60 | 4     |
| 14 | 1,473.70 | 737.35 | 1,456.67 | 728.84 | 1,455.69 | 728.35 | D   | 349.17   | 175.09 | 332.15   | 166.58 | 331.16   | 166.08 | 3     |
| 15 | 1,560.73 | 780.87 | 1,543.71 | 772.36 | 1,542.72 | 771.86 | S   | 234.14   | 117.58 | 217.12   | 109.06 | 216.13   | 108.57 | 2     |
| 16 |          |        |          |        |          |        | K   | 147.11   | 74.06  | 130.09   | 65.55  |          |        | 1     |

Query 6571 Hit 1

MS/MS Fragmentation of **LLEAIIR**

Found in **sp|Q96H55|MYO19\_HUMAN**, Unconventional myosin-XIX OS=Homo sapiens GN=MYO19 PE=2 SV=2

Match to Query 6571: 970.5917 from (486.3031, 2+)

Title: 153: Sum of 2 scans in range 1099 (rt=30.6661, f=4, i=79) to 1100 (rt=30.6915, f=4, i=80)

[D:\lab212\membrane\GraceJoyce\iTRAQ\_26\_1.raw]

Data File: Submitted from 20120508-1 (merge) by Mascot Daemon on JOYCE-VAIO

Monoisotopic mass of neutral peptide Mr(calc): 970.5917

Variable modifications:

Ions Score: 42.35 Expect: 0.023

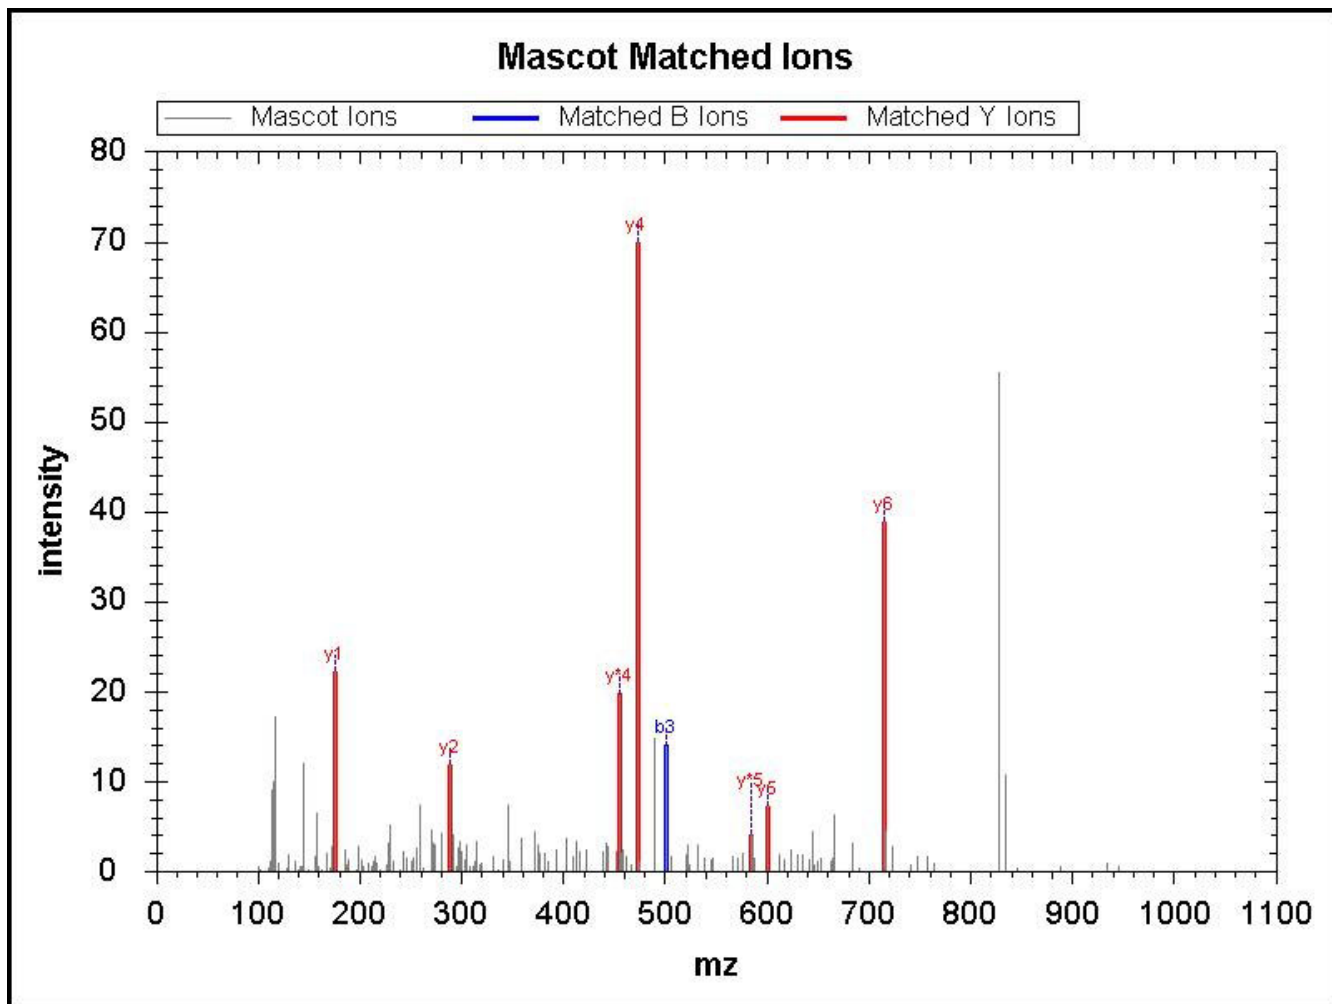

| No | b      | b++    | b0     | b0++   | Seq | y      | y++    | y*     | y*++   | y0     | y0++   | RevNo |
|----|--------|--------|--------|--------|-----|--------|--------|--------|--------|--------|--------|-------|
| 1  | 258.19 | 129.60 |        |        | L   |        |        |        |        |        |        | 7     |
| 2  | 371.28 | 186.14 |        |        | L   | 714.45 | 357.73 | 697.42 | 349.22 | 696.44 | 348.72 | 6     |
| 3  | 500.32 | 250.66 | 482.31 | 241.66 | E   | 601.37 | 301.19 | 584.34 | 292.67 | 583.36 | 292.18 | 5     |
| 4  | 571.36 | 286.18 | 553.35 | 277.18 | A   | 472.32 | 236.67 | 455.30 | 228.15 |        |        | 4     |
| 5  | 684.44 | 342.72 | 666.43 | 333.72 | I   | 401.29 | 201.15 | 384.26 | 192.63 |        |        | 3     |
| 6  | 797.53 | 399.27 | 779.51 | 390.26 | I   | 288.20 | 144.61 | 271.18 | 136.09 |        |        | 2     |
| 7  |        |        |        |        | R   | 175.12 | 88.06  | 158.09 | 79.55  |        |        | 1     |

Query 84445 Hit 1

MS/MS Fragmentation of **EQLEQELEELTASLFEEAHK**

Found in **sp|Q8TBN0|R3GEF\_HUMAN**, Guanine nucleotide exchange factor for Rab-3A OS=Homo sapiens GN=RAB3IL1 PE=1 SV=1

Match to Query 84445: 2660.336 from (887.7858, 3+)

Title: 1152: Sum of 2 scans in range 2806 (rt=71.309, f=3, i=405) to 2807 (rt=71.3344, f=3, i=406)

[D:\lab212\membrane\GraceJoyce\iTRAQ\_34\_1.raw]

Data File: Submitted from 20120508-1 (merge) by Mascot Daemon on JOYCE-VAIO

Monoisotopic mass of neutral peptide Mr(calc): 2660.336

Variable modifications:

K20 iTRAQ4plex (K)

Ions Score: 42.32 Expect: 0.055

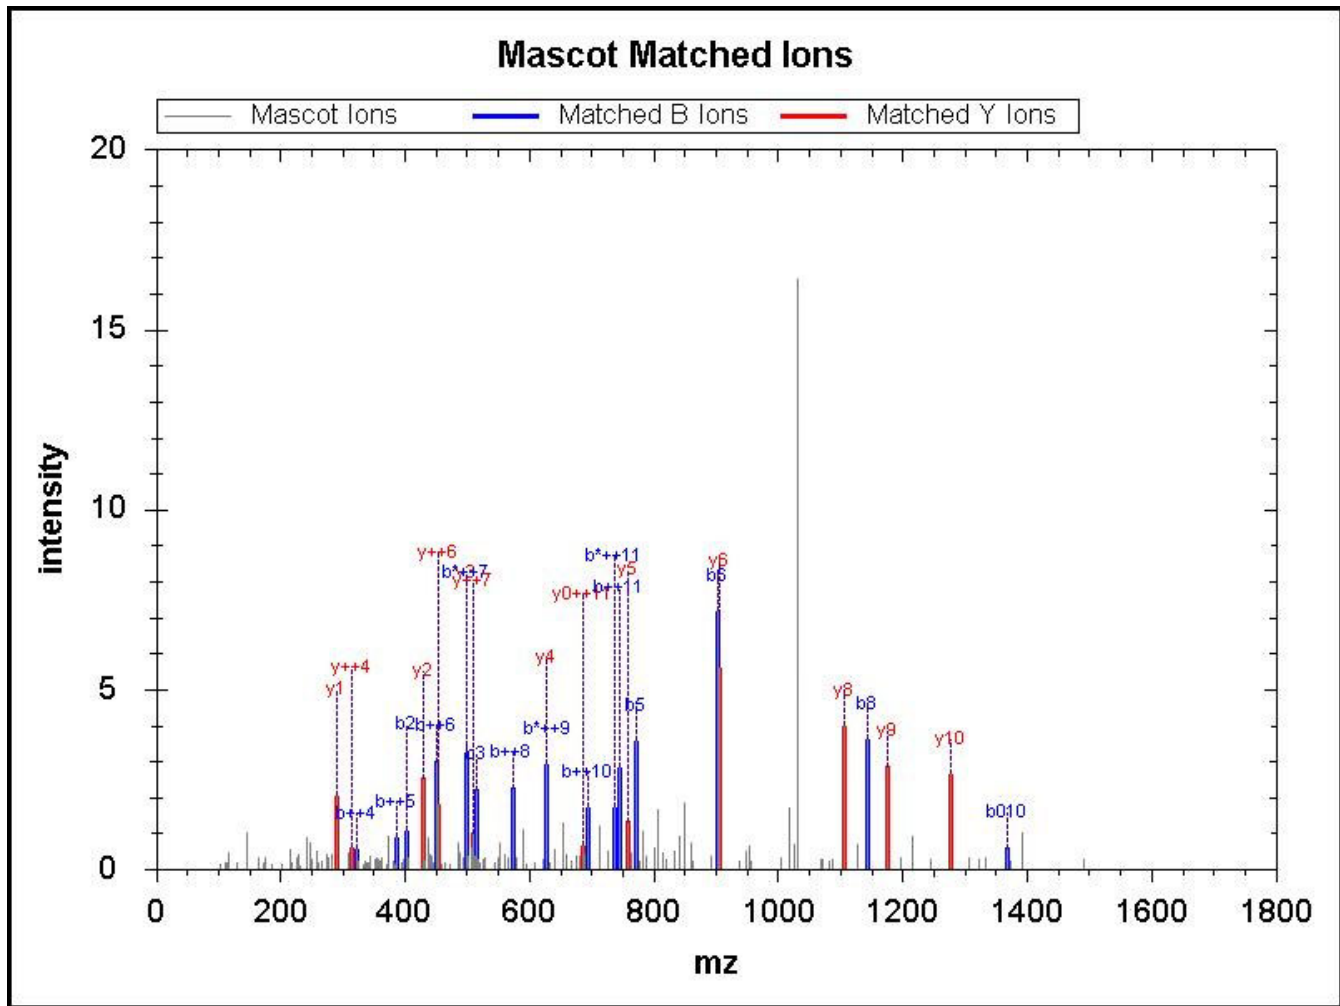

| No | b        | b++      | b*       | b*++     | b0       | b0++     | Seq | y        | y++      | y*       | y*++     | y0       | y0++     | RevNo |
|----|----------|----------|----------|----------|----------|----------|-----|----------|----------|----------|----------|----------|----------|-------|
| 1  | 274.15   | 137.58   |          |          | 256.14   | 128.57   | E   |          |          |          |          |          |          | 20    |
| 2  | 402.21   | 201.61   | 385.18   | 193.10   | 384.20   | 192.60   | Q   | 2,388.21 | 1,194.61 | 2,371.18 | 1,186.09 | 2,370.19 | 1,185.60 | 19    |
| 3  | 515.29   | 258.15   | 498.27   | 249.64   | 497.28   | 249.15   | L   | 2,260.15 | 1,130.58 | 2,243.12 | 1,122.06 | 2,242.14 | 1,121.57 | 18    |
| 4  | 644.34   | 322.67   | 627.31   | 314.16   | 626.33   | 313.67   | E   | 2,147.06 | 1,074.03 | 2,130.04 | 1,065.52 | 2,129.05 | 1,065.03 | 17    |
| 5  | 772.40   | 386.70   | 755.37   | 378.19   | 754.39   | 377.70   | Q   | 2,018.02 | 1,009.51 | 2,000.99 | 1,001.00 | 2,000.01 | 1,000.51 | 16    |
| 6  | 901.44   | 451.22   | 884.41   | 442.71   | 883.43   | 442.22   | E   | 1,889.96 | 945.48   | 1,872.93 | 936.97   | 1,871.95 | 936.48   | 15    |
| 7  | 1,014.52 | 507.76   | 997.50   | 499.25   | 996.51   | 498.76   | L   | 1,760.92 | 880.96   | 1,743.89 | 872.45   | 1,742.91 | 871.96   | 14    |
| 8  | 1,143.57 | 572.29   | 1,126.54 | 563.77   | 1,125.55 | 563.28   | E   | 1,647.83 | 824.42   | 1,630.81 | 815.91   | 1,629.82 | 815.42   | 13    |
| 9  | 1,272.61 | 636.81   | 1,255.58 | 628.29   | 1,254.60 | 627.80   | E   | 1,518.79 | 759.90   | 1,501.77 | 751.39   | 1,500.78 | 750.89   | 12    |
| 10 | 1,385.69 | 693.35   | 1,368.67 | 684.84   | 1,367.68 | 684.34   | L   | 1,389.75 | 695.38   | 1,372.72 | 686.87   | 1,371.74 | 686.37   | 11    |
| 11 | 1,486.74 | 743.87   | 1,469.71 | 735.36   | 1,468.73 | 734.87   | T   | 1,276.67 | 638.84   | 1,259.64 | 630.32   | 1,258.65 | 629.83   | 10    |
| 12 | 1,557.78 | 779.39   | 1,540.75 | 770.88   | 1,539.77 | 770.39   | A   | 1,175.62 | 588.31   | 1,158.59 | 579.80   | 1,157.61 | 579.31   | 9     |
| 13 | 1,644.81 | 822.91   | 1,627.78 | 814.39   | 1,626.80 | 813.90   | S   | 1,104.58 | 552.79   | 1,087.55 | 544.28   | 1,086.57 | 543.79   | 8     |
| 14 | 1,757.89 | 879.45   | 1,740.87 | 870.94   | 1,739.88 | 870.44   | L   | 1,017.55 | 509.28   | 1,000.52 | 500.76   | 999.54   | 500.27   | 7     |
| 15 | 1,904.96 | 952.98   | 1,887.93 | 944.47   | 1,886.95 | 943.98   | F   | 904.46   | 452.74   | 887.44   | 444.22   | 886.45   | 443.73   | 6     |
| 16 | 2,034.00 | 1,017.51 | 2,016.98 | 1,008.99 | 2,015.99 | 1,008.50 | E   | 757.40   | 379.20   | 740.37   | 370.69   | 739.39   | 370.20   | 5     |
| 17 | 2,163.05 | 1,082.03 | 2,146.02 | 1,073.51 | 2,145.04 | 1,073.02 | E   | 628.35   | 314.68   | 611.33   | 306.17   | 610.34   | 305.68   | 4     |
| 18 | 2,234.08 | 1,117.55 | 2,217.06 | 1,109.03 | 2,216.07 | 1,108.54 | A   | 499.31   | 250.16   | 482.28   | 241.65   |          |          | 3     |
| 19 | 2,371.14 | 1,186.07 | 2,354.12 | 1,177.56 | 2,353.13 | 1,177.07 | H   | 428.27   | 214.64   | 411.25   | 206.13   |          |          | 2     |
| 20 |          |          |          |          |          |          | K   | 291.21   | 146.11   | 274.19   | 137.60   |          |          | 1     |

Query 48000 Hit 1

MS/MS Fragmentation of **ITESSLVEITEHK**

Found in **sp|Q99590|SCAFB\_HUMAN**, Protein SCAF11 OS=Homo sapiens GN=SCAF11 PE=1 SV=2

Match to Query 48000: 1772.978from(592.0001,3+)

Title: 583: Scan 1317 (rt=39.2685, f=3, i=203) [D:\lab212\membrane\Grace\Joyce\iTRAQ\_39\_2.raw]

Data File: Submitted from 20120508-1(merge) by Mascot Daemon on JOYCE-VAIO

Monoisotopic mass of neutral peptide Mr(calc): 1772.978

Variable modifications:

K13 :iTRAQ4plex (K)

Ions Score: 42.29 Expect: 0.046

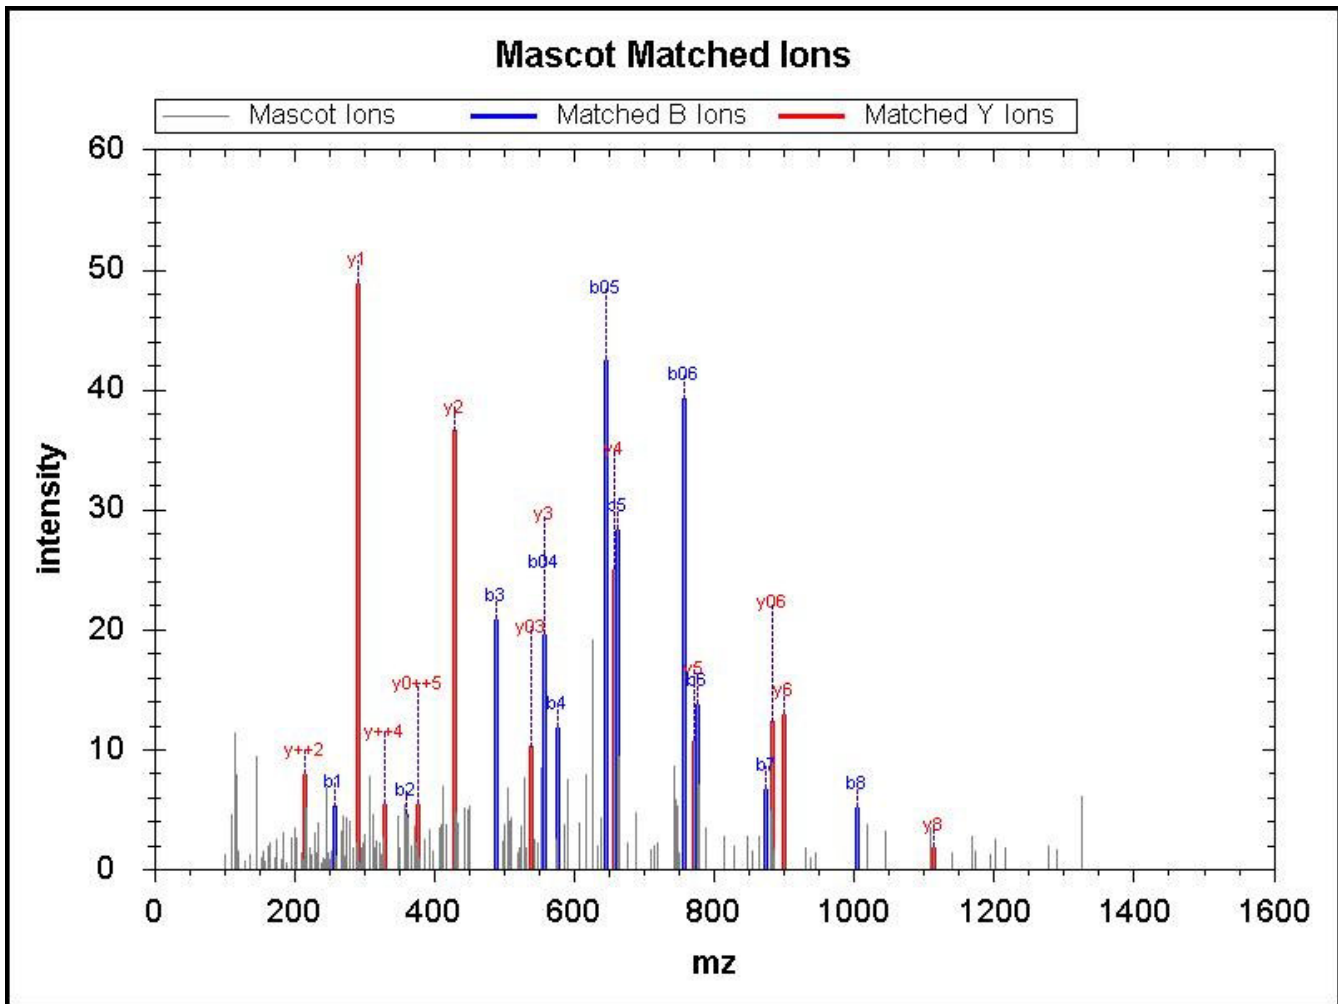

| No | b        | b++    | b0       | b0++   | Seq | y        | y++    | y*       | y*++   | y0       | y0++   | RevNo |
|----|----------|--------|----------|--------|-----|----------|--------|----------|--------|----------|--------|-------|
| 1  | 258.19   | 129.60 |          |        | I   |          |        |          |        |          |        | 13    |
| 2  | 359.24   | 180.12 | 341.23   | 171.12 | T   | 1,516.80 | 758.90 | 1,499.77 | 750.39 | 1,498.79 | 749.90 | 12    |
| 3  | 488.28   | 244.65 | 470.27   | 235.64 | E   | 1,415.75 | 708.38 | 1,398.72 | 699.87 | 1,397.74 | 699.37 | 11    |
| 4  | 575.32   | 288.16 | 557.31   | 279.16 | S   | 1,286.71 | 643.86 | 1,269.68 | 635.34 | 1,268.70 | 634.85 | 10    |
| 5  | 662.35   | 331.68 | 644.34   | 322.67 | S   | 1,199.68 | 600.34 | 1,182.65 | 591.83 | 1,181.66 | 591.34 | 9     |
| 6  | 775.43   | 388.22 | 757.42   | 379.21 | L   | 1,112.64 | 556.83 | 1,095.62 | 548.31 | 1,094.63 | 547.82 | 8     |
| 7  | 874.50   | 437.75 | 856.49   | 428.75 | V   | 999.56   | 500.28 | 982.53   | 491.77 | 981.55   | 491.28 | 7     |
| 8  | 1,003.54 | 502.28 | 985.53   | 493.27 | E   | 900.49   | 450.75 | 883.46   | 442.24 | 882.48   | 441.74 | 6     |
| 9  | 1,116.63 | 558.82 | 1,098.62 | 549.81 | I   | 771.45   | 386.23 | 754.42   | 377.71 | 753.44   | 377.22 | 5     |
| 10 | 1,217.67 | 609.34 | 1,199.66 | 600.34 | T   | 658.36   | 329.69 | 641.34   | 321.17 | 640.35   | 320.68 | 4     |
| 11 | 1,346.72 | 673.86 | 1,328.71 | 664.86 | E   | 557.32   | 279.16 | 540.29   | 270.65 | 539.31   | 270.16 | 3     |
| 12 | 1,483.78 | 742.39 | 1,465.77 | 733.39 | H   | 428.27   | 214.64 | 411.25   | 206.13 |          |        | 2     |
| 13 |          |        |          |        | K   | 291.21   | 146.11 | 274.19   | 137.60 |          |        | 1     |

Query 4507 Hit 1

MS/MS Fragmentation of **SGLDQIK**

Found in **sp|Q9Y4D8|K0614\_HUMAN**, Probable E3 ubiquitin-protein ligase C12orf51 OS=Homo sapiens GN=C12orf51 PE=1 SV=5

Match to Query 4507: 904.5459from(453.2802,2+)

Title: 273: Sum of 2 scans in range 643 (rt=24.1546, f=4, i=181) to 644 (rt=24.18, f=4, i=182)

[D:\lab212\membrane\Grace\Joyce\iTRAQ\_33\_2.raw]

Data File:Submitted from 20120508-1(merge) by Mascot Daemon on JOYCE-VAIO

Monoisotopic mass of neutral peptide Mr(calc): 904.5459

Variable modifications:

Q5 :Deamidated (NQ)

K7 :iTRAQ4plex (K)

Ions Score: 42.29 Expect: 0.051

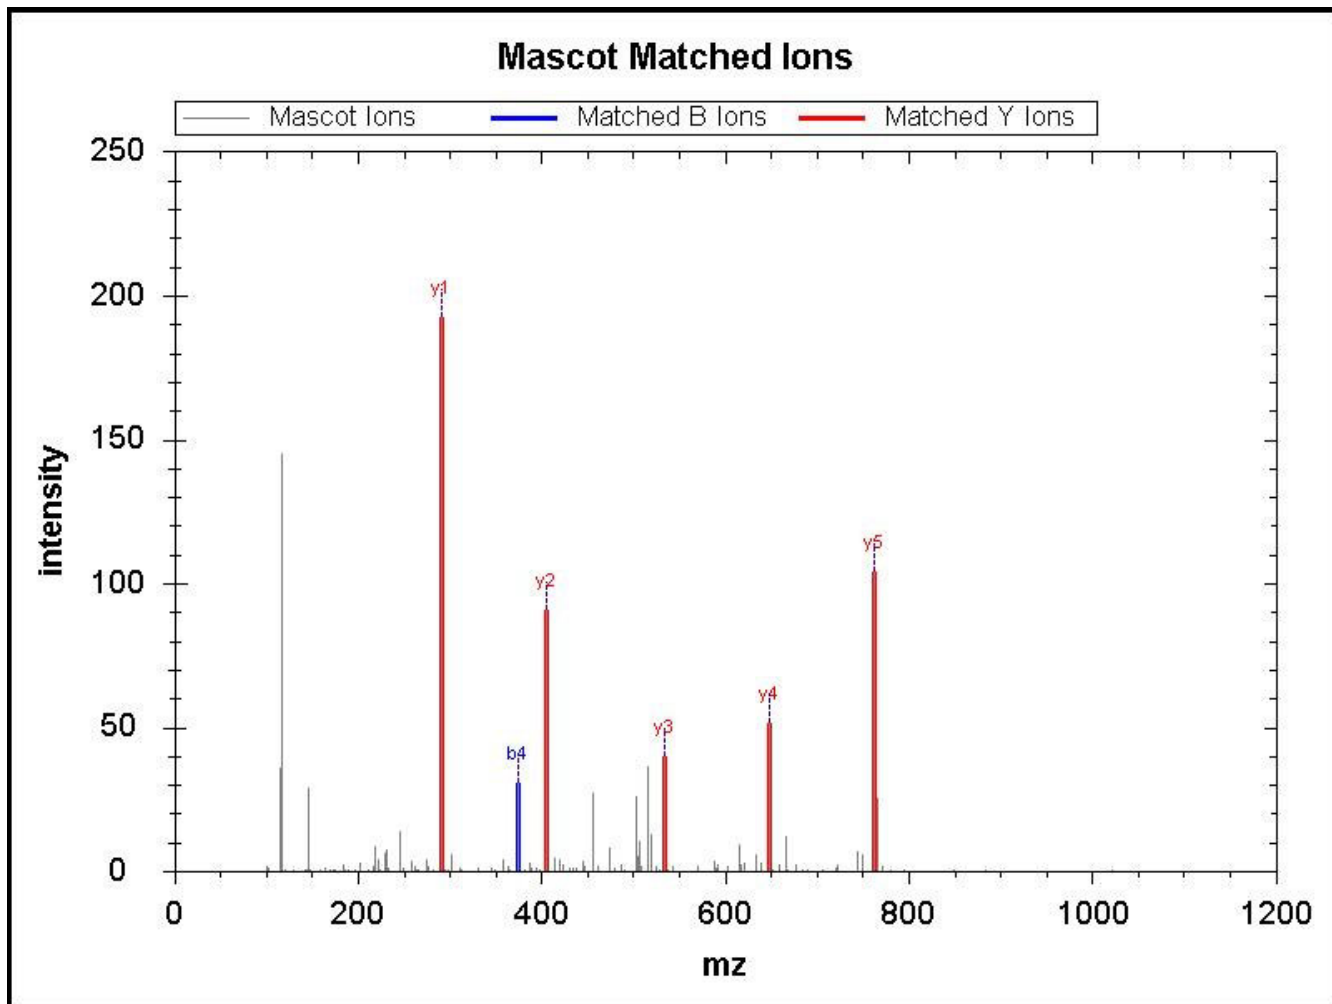

| No | b      | b++    | b*     | b***   | b0     | b0++   | Seq | y      | y++    | y*     | y***   | y0     | y0++   | RevNo |
|----|--------|--------|--------|--------|--------|--------|-----|--------|--------|--------|--------|--------|--------|-------|
| 1  | 88.04  | 44.52  |        |        | 70.03  | 35.52  | S   |        |        |        |        |        |        | 7     |
| 2  | 145.06 | 73.03  |        |        | 127.05 | 64.03  | G   | 818.47 | 409.74 | 801.45 | 401.23 | 800.46 | 400.74 | 6     |
| 3  | 258.14 | 129.58 |        |        | 240.13 | 120.57 | L   | 761.45 | 381.23 | 744.43 | 372.72 | 743.44 | 372.22 | 5     |
| 4  | 373.17 | 187.09 |        |        | 355.16 | 178.08 | D   | 648.37 | 324.69 | 631.34 | 316.17 | 630.36 | 315.68 | 4     |
| 5  | 502.21 | 251.61 | 485.19 | 243.10 | 484.20 | 242.61 | Q   | 533.34 | 267.17 | 516.31 | 258.66 |        |        | 3     |
| 6  | 615.30 | 308.15 | 598.27 | 299.64 | 597.29 | 299.15 | I   | 404.30 | 202.65 | 387.27 | 194.14 |        |        | 2     |
| 7  |        |        |        |        |        |        | K   | 291.21 | 146.11 | 274.19 | 137.60 |        |        | 1     |

Query 41486 Hit 1

MS/MS Fragmentation of **ISPEAFKPLVK**

Found in **sp|P28654|PGS2\_MOUSE**, Decorin OS=Mus musculus GN=Dcn PE=2 SV=1

Match to Query 41486: 1660.017from(554.3464,3+)

Title: 601: Scan 1362 (rt=40.2757, f=2, i=222) [D:\lab212\membrane\Grace\Joyce\iTRAQ\_44\_2.raw]

Data File:Submitted from 20120508-1(merge) by Mascot Daemon on JOYCE-VAIO

Monoisotopic mass of neutral peptide Mr(calc): 1660.017

Variable modifications:



K7 iTRAQ4plex (K)  
 K11 iTRAQ4plex (K)  
 Ions Score: 42.26 Expect: 0.020

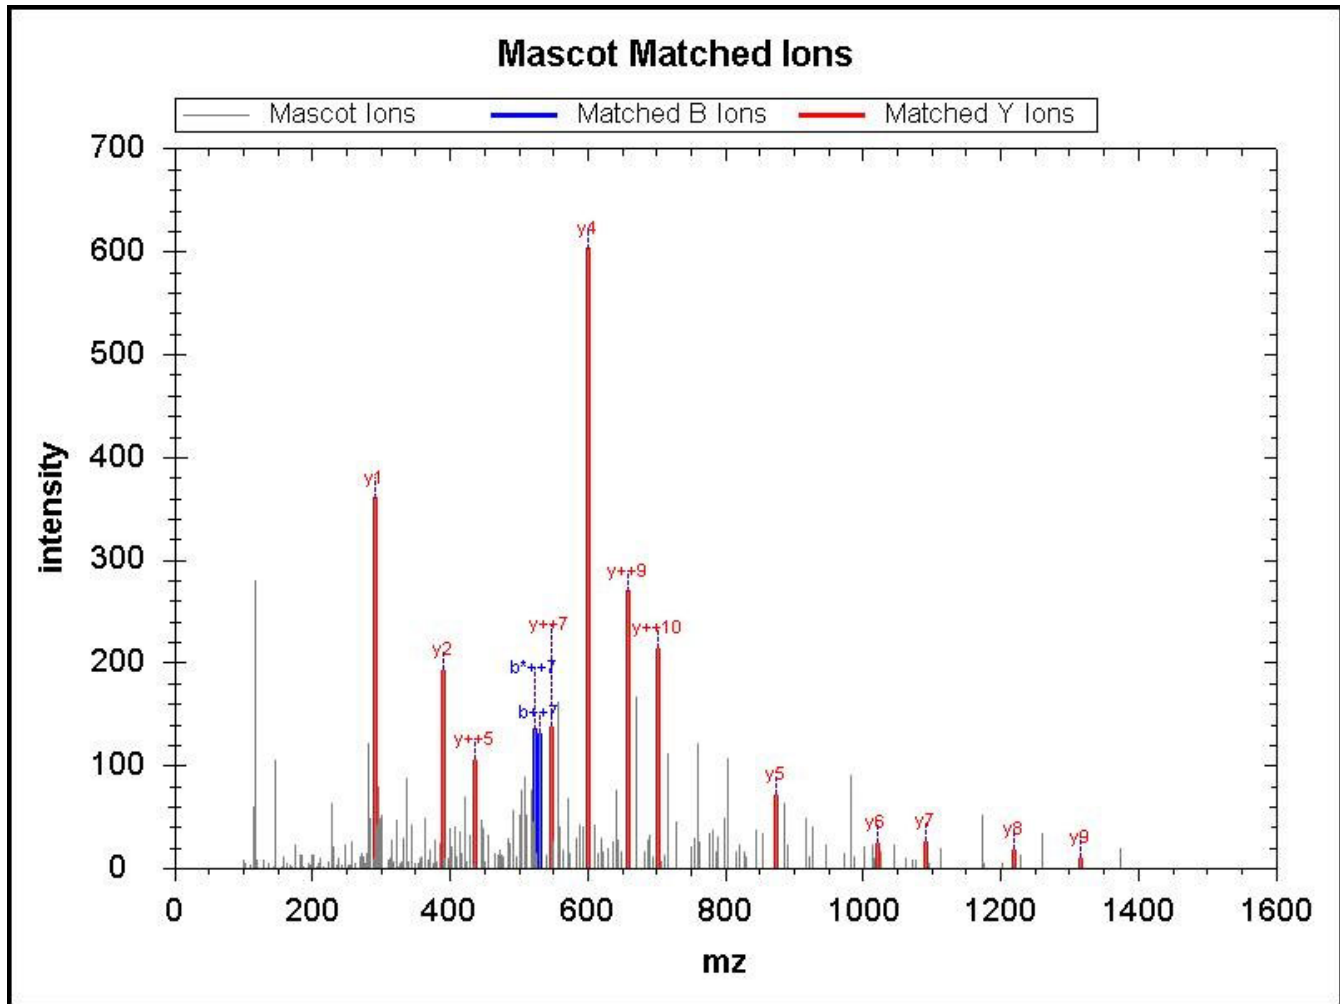

| No | b        | b++    | b*       | b*++   | b0       | b0++   | Seq | y        | y++    | y*       | y*++   | y0       | y0++   | RevNo |
|----|----------|--------|----------|--------|----------|--------|-----|----------|--------|----------|--------|----------|--------|-------|
| 1  | 258.19   | 129.60 |          |        |          |        | I   |          |        |          |        |          |        | 11    |
| 2  | 345.23   | 173.12 |          |        | 327.21   | 164.11 | S   | 1,403.85 | 702.43 | 1,386.82 | 693.92 | 1,385.84 | 693.42 | 10    |
| 3  | 442.28   | 221.64 |          |        | 424.27   | 212.64 | P   | 1,316.82 | 658.91 | 1,299.79 | 650.40 | 1,298.81 | 649.91 | 9     |
| 4  | 571.32   | 286.16 |          |        | 553.31   | 277.16 | E   | 1,219.77 | 610.39 | 1,202.74 | 601.87 | 1,201.75 | 601.38 | 8     |
| 5  | 642.36   | 321.68 |          |        | 624.35   | 312.68 | A   | 1,090.72 | 545.86 | 1,073.70 | 537.35 |          |        | 7     |
| 6  | 789.43   | 395.22 |          |        | 771.42   | 386.21 | F   | 1,019.69 | 510.35 | 1,002.66 | 501.83 |          |        | 6     |
| 7  | 1,061.62 | 531.32 | 1,044.60 | 522.80 | 1,043.61 | 522.31 | K   | 872.62   | 436.81 | 855.59   | 428.30 |          |        | 5     |
| 8  | 1,158.68 | 579.84 | 1,141.65 | 571.33 | 1,140.67 | 570.84 | P   | 600.42   | 300.71 | 583.39   | 292.20 |          |        | 4     |
| 9  | 1,271.76 | 636.38 | 1,254.73 | 627.87 | 1,253.75 | 627.38 | L   | 503.37   | 252.19 | 486.34   | 243.67 |          |        | 3     |
| 10 | 1,370.83 | 685.92 | 1,353.80 | 677.40 | 1,352.82 | 676.91 | V   | 390.28   | 195.65 | 373.26   | 187.13 |          |        | 2     |
| 11 |          |        |          |        |          |        | K   | 291.21   | 146.11 | 274.19   | 137.60 |          |        | 1     |

Query 68815 Hit 1

MS/MS Fragmentation of **DILMVVGNEIIEAPMAWR**

Found in **sp|Q9D964|GATM\_MOUSE**, Glycine amidinotransferase

Match to Query 68815: 2200.151 from (734.3909, 3+)

Title: 1127: Scan 2939 (rt=73.5423, f=3, i=384) [D:\lab212\membrane\GraceJoyce\20120320\_iTRAQ\_20-2.raw]

Data File: Submitted from 20120508-1 (merge) by Mascot Daemon on JOYCE-VAIO

Monoisotopic mass of neutral peptide Mr(calc): 2200.151

Variable modifications:

Ions Score: 42.22 Expect: 0.054

### Mascot Matched Ions

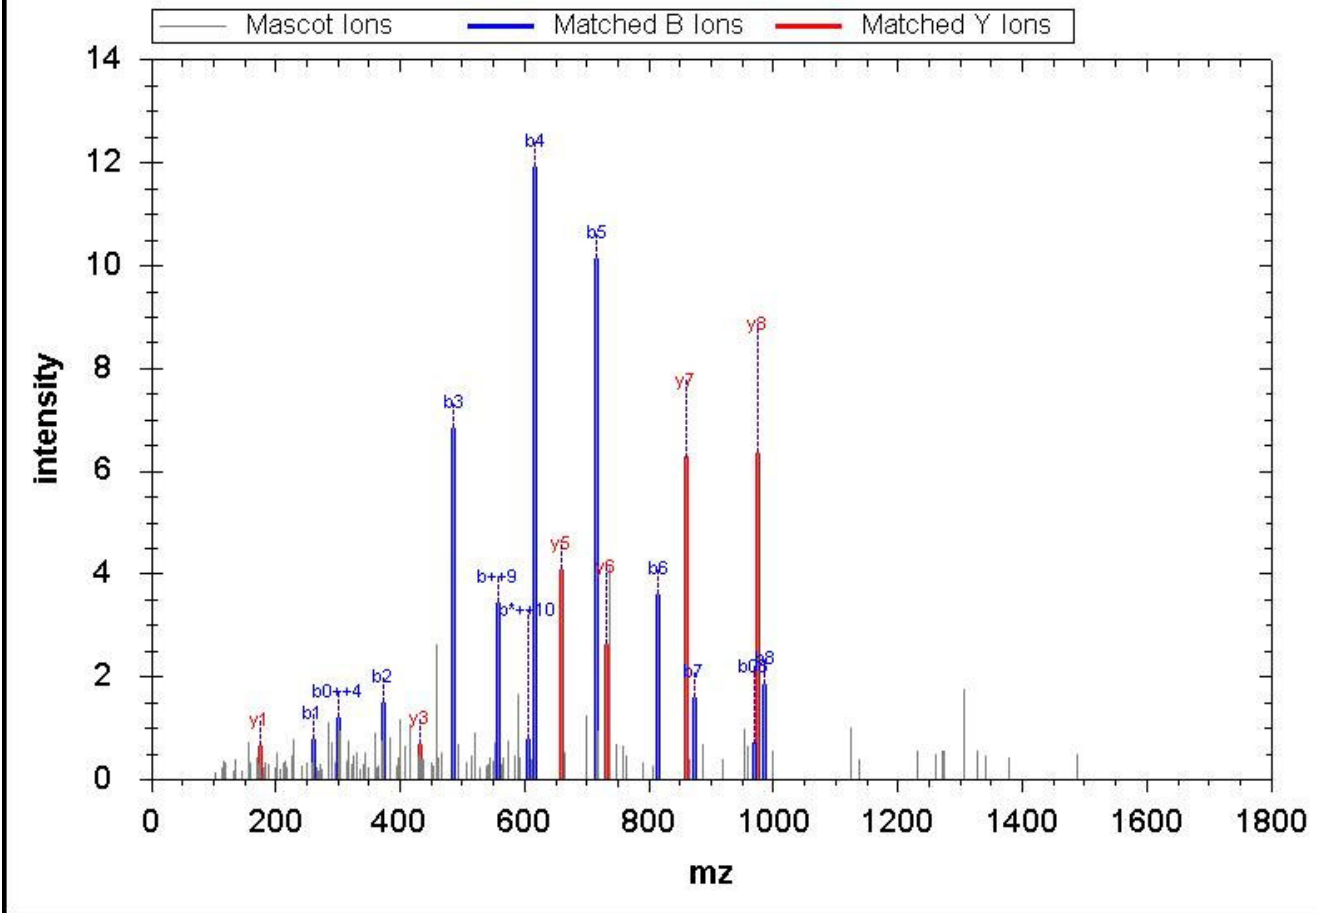

| No | b        | b++      | b*       | b*++     | b0       | b0++     | Seq | y        | y++    | y*       | y*++   | y0       | y0++   | RevNo |
|----|----------|----------|----------|----------|----------|----------|-----|----------|--------|----------|--------|----------|--------|-------|
| 1  | 260.14   | 130.57   |          |          | 242.13   | 121.57   | D   |          |        |          |        |          |        | 18    |
| 2  | 373.22   | 187.11   |          |          | 355.21   | 178.11   | I   | 1,942.03 | 971.52 | 1,925.00 | 963.00 | 1,924.02 | 962.51 | 17    |
| 3  | 486.30   | 243.66   |          |          | 468.29   | 234.65   | L   | 1,828.94 | 914.98 | 1,811.92 | 906.46 | 1,810.93 | 905.97 | 16    |
| 4  | 617.34   | 309.18   |          |          | 599.33   | 300.17   | M   | 1,715.86 | 858.43 | 1,698.83 | 849.92 | 1,697.85 | 849.43 | 15    |
| 5  | 716.41   | 358.71   |          |          | 698.40   | 349.70   | V   | 1,584.82 | 792.91 | 1,567.79 | 784.40 | 1,566.81 | 783.91 | 14    |
| 6  | 815.48   | 408.24   |          |          | 797.47   | 399.24   | V   | 1,485.75 | 743.38 | 1,468.73 | 734.87 | 1,467.74 | 734.37 | 13    |
| 7  | 872.50   | 436.76   |          |          | 854.49   | 427.75   | G   | 1,386.68 | 693.85 | 1,369.66 | 685.33 | 1,368.67 | 684.84 | 12    |
| 8  | 986.55   | 493.78   | 969.52   | 485.26   | 968.54   | 484.77   | N   | 1,329.66 | 665.33 | 1,312.64 | 656.82 | 1,311.65 | 656.33 | 11    |
| 9  | 1,115.59 | 558.30   | 1,098.56 | 549.78   | 1,097.58 | 549.29   | E   | 1,215.62 | 608.31 | 1,198.59 | 599.80 | 1,197.61 | 599.31 | 10    |
| 10 | 1,228.67 | 614.84   | 1,211.65 | 606.33   | 1,210.66 | 605.83   | I   | 1,086.58 | 543.79 | 1,069.55 | 535.28 | 1,068.57 | 534.79 | 9     |
| 11 | 1,341.76 | 671.38   | 1,324.73 | 662.87   | 1,323.75 | 662.38   | I   | 973.49   | 487.25 | 956.47   | 478.74 | 955.48   | 478.24 | 8     |
| 12 | 1,470.80 | 735.90   | 1,453.77 | 727.39   | 1,452.79 | 726.90   | E   | 860.41   | 430.71 | 843.38   | 422.19 | 842.40   | 421.70 | 7     |
| 13 | 1,541.84 | 771.42   | 1,524.81 | 762.91   | 1,523.83 | 762.42   | A   | 731.37   | 366.19 | 714.34   | 357.67 |          |        | 6     |
| 14 | 1,638.89 | 819.95   | 1,621.86 | 811.44   | 1,620.88 | 810.94   | P   | 660.33   | 330.67 | 643.30   | 322.15 |          |        | 5     |
| 15 | 1,769.93 | 885.47   | 1,752.90 | 876.96   | 1,751.92 | 876.46   | M   | 563.28   | 282.14 | 546.25   | 273.63 |          |        | 4     |
| 16 | 1,840.97 | 920.99   | 1,823.94 | 912.47   | 1,822.96 | 911.98   | A   | 432.24   | 216.62 | 415.21   | 208.11 |          |        | 3     |
| 17 | 2,027.05 | 1,014.03 | 2,010.02 | 1,005.51 | 2,009.04 | 1,005.02 | W   | 361.20   | 181.10 | 344.17   | 172.59 |          |        | 2     |
| 18 |          |          |          |          |          |          | R   | 175.12   | 88.06  | 158.09   | 79.55  |          |        | 1     |

Query 52871 Hit 1

MS/MS Fragmentation of **TPLEQEIFNLLHK**

Found in **sp|Q9BVJ6|UT14A\_HUMAN**, U3 small nucleolar RNA-associated protein 14 homolog A OS=Homo sapiens GN=UTP14A PE=1 SV=1

Match to Query 52871: 1869.061 from (624.0277,3+)

Title: 1098: Sum of 2 scans in range 2391 (rt=63.4708, f=4, i=731) to 2392 (rt=63.4962, f=4, i=732)  
 [D:\lab212\membrane\GraceJoyce\iTRAQ\_39\_2.raw]  
 Data File: Submitted from 20120508-1(merge) by Mascot Daemon on JOYCE-VAIO  
 Monoisotopic mass of neutral peptide Mr(calc): 1869.061  
 Variable modifications:  
 K13 :iTRAQ4plex (K)  
 Ions Score: 42.21 Expect: 0.035

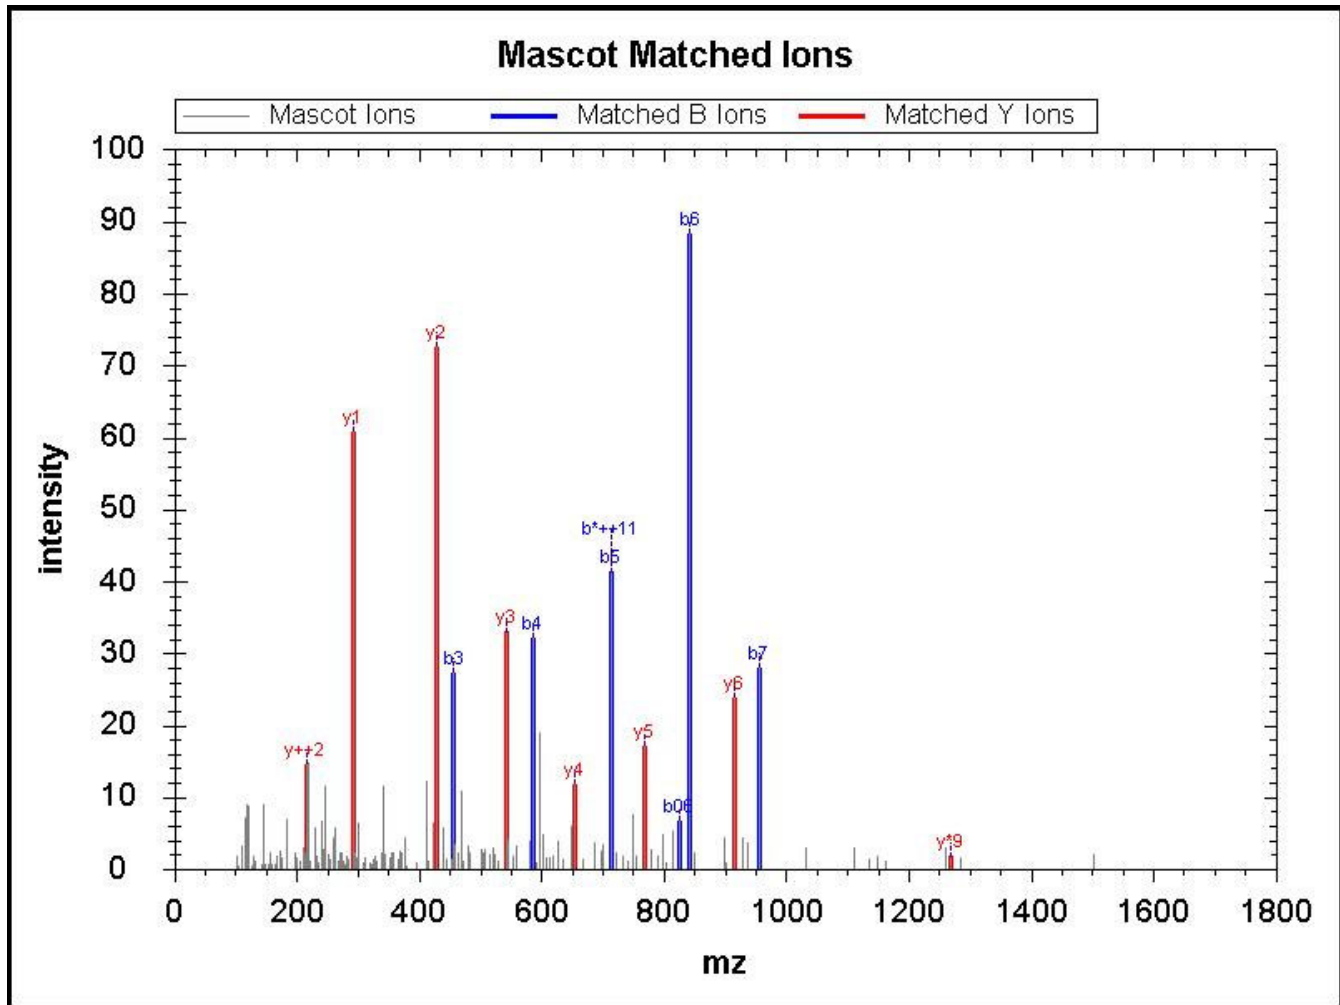

| No | b        | b++    | b*       | b*++   | b0       | b0++   | Seq | y        | y++    | y*       | y*++   | y0       | y0++   | RevNo |
|----|----------|--------|----------|--------|----------|--------|-----|----------|--------|----------|--------|----------|--------|-------|
| 1  | 246.16   | 123.58 |          |        | 228.15   | 114.58 | T   |          |        |          |        |          |        | 13    |
| 2  | 343.21   | 172.11 |          |        | 325.20   | 163.10 | P   | 1,624.92 | 812.96 | 1,607.89 | 804.45 | 1,606.91 | 803.96 | 12    |
| 3  | 456.29   | 228.65 |          |        | 438.28   | 219.65 | L   | 1,527.87 | 764.44 | 1,510.84 | 755.92 | 1,509.85 | 755.43 | 11    |
| 4  | 585.34   | 293.17 |          |        | 567.33   | 284.17 | E   | 1,414.78 | 707.89 | 1,397.75 | 699.38 | 1,396.77 | 698.89 | 10    |
| 5  | 713.40   | 357.20 | 696.37   | 348.69 | 695.38   | 348.20 | Q   | 1,285.74 | 643.37 | 1,268.71 | 634.86 | 1,267.73 | 634.37 | 9     |
| 6  | 842.44   | 421.72 | 825.41   | 413.21 | 824.43   | 412.72 | E   | 1,157.68 | 579.34 | 1,140.65 | 570.83 | 1,139.67 | 570.34 | 8     |
| 7  | 955.52   | 478.26 | 938.50   | 469.75 | 937.51   | 469.26 | I   | 1,028.64 | 514.82 | 1,011.61 | 506.31 |          |        | 7     |
| 8  | 1,102.59 | 551.80 | 1,085.56 | 543.29 | 1,084.58 | 542.79 | F   | 915.55   | 458.28 | 898.53   | 449.77 |          |        | 6     |
| 9  | 1,216.63 | 608.82 | 1,199.61 | 600.31 | 1,198.62 | 599.81 | N   | 768.48   | 384.75 | 751.46   | 376.23 |          |        | 5     |
| 10 | 1,329.72 | 665.36 | 1,312.69 | 656.85 | 1,311.71 | 656.36 | L   | 654.44   | 327.72 | 637.42   | 319.21 |          |        | 4     |
| 11 | 1,442.80 | 721.90 | 1,425.77 | 713.39 | 1,424.79 | 712.90 | L   | 541.36   | 271.18 | 524.33   | 262.67 |          |        | 3     |
| 12 | 1,579.86 | 790.43 | 1,562.83 | 781.92 | 1,561.85 | 781.43 | H   | 428.27   | 214.64 | 411.25   | 206.13 |          |        | 2     |
| 13 |          |        |          |        |          |        | K   | 291.21   | 146.11 | 274.19   | 137.60 |          |        | 1     |

Query 66383 Hit 1

MS/MS Fragmentation of **LTFLSLLDLPLTIAAEK**

Found in **sp|P36371|TAP2\_MOUSE**, Antigen peptide transporter 2 OS=Mus musculus GN=Tap2 PE=2 SV=1

Match to Query 66383: 2145.292from(716.1045,3+)

Title: 1252: Sum of 2 scans in range 3564 (rt=85.6585, f=2, i=512) to 3565 (rt=85.6839, f=2, i=513)  
 [D:\lab212\membrane\Grace\Joyce\iTRAQ\_25\_1.raw]  
 Data File: Submitted from 20120508-1(merge) by Mascot Daemon on JOYCE-VAIO  
 Monoisotopic mass of neutral peptide Mr(calc): 2145.292  
 Variable modifications:  
 K17 iTRAQ4plex (K)  
 Ions Score: 42.16 Expect: 0.011

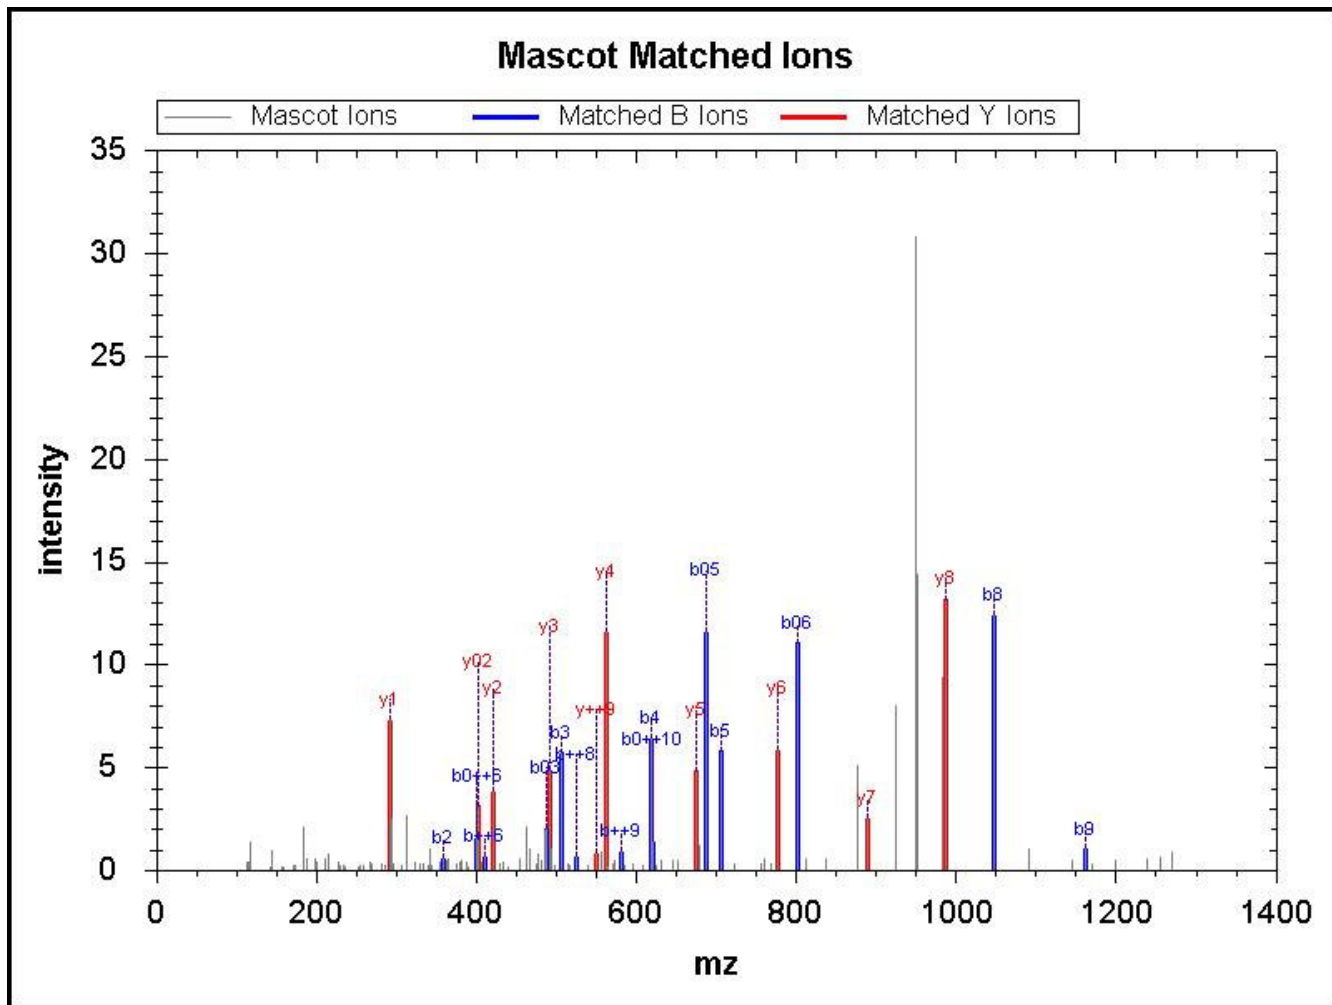

Query 97416 Hit 1

MS/MS Fragmentation of **VVVRPVEDGEIQGVWLLTEVDHWNNEK**

Found in **sp|Q5T0D9|TPRGL\_HUMAN**, Tumor protein p63-regulated gene 1-like protein OS=Homo sapiens GN=TPRG1L PE=1 SV=1

Match to Query 97416: 3447.796from(862.9563,4+)

Title: 1015: Scan 2218 (rt=59.5686, f=3, i=345) [D:\lab212\membrane\Grace\Joyce\iTRAQ\_44\_2.raw]

Data File: Submitted from 20120508-1(merge) by Mascot Daemon on JOYCE-VAIO

Monoisotopic mass of neutral peptide Mr(calc): 3447.796

Variable modifications:

K27 iTRAQ4plex (K)

Ions Score: 42.14 Expect: 0.041

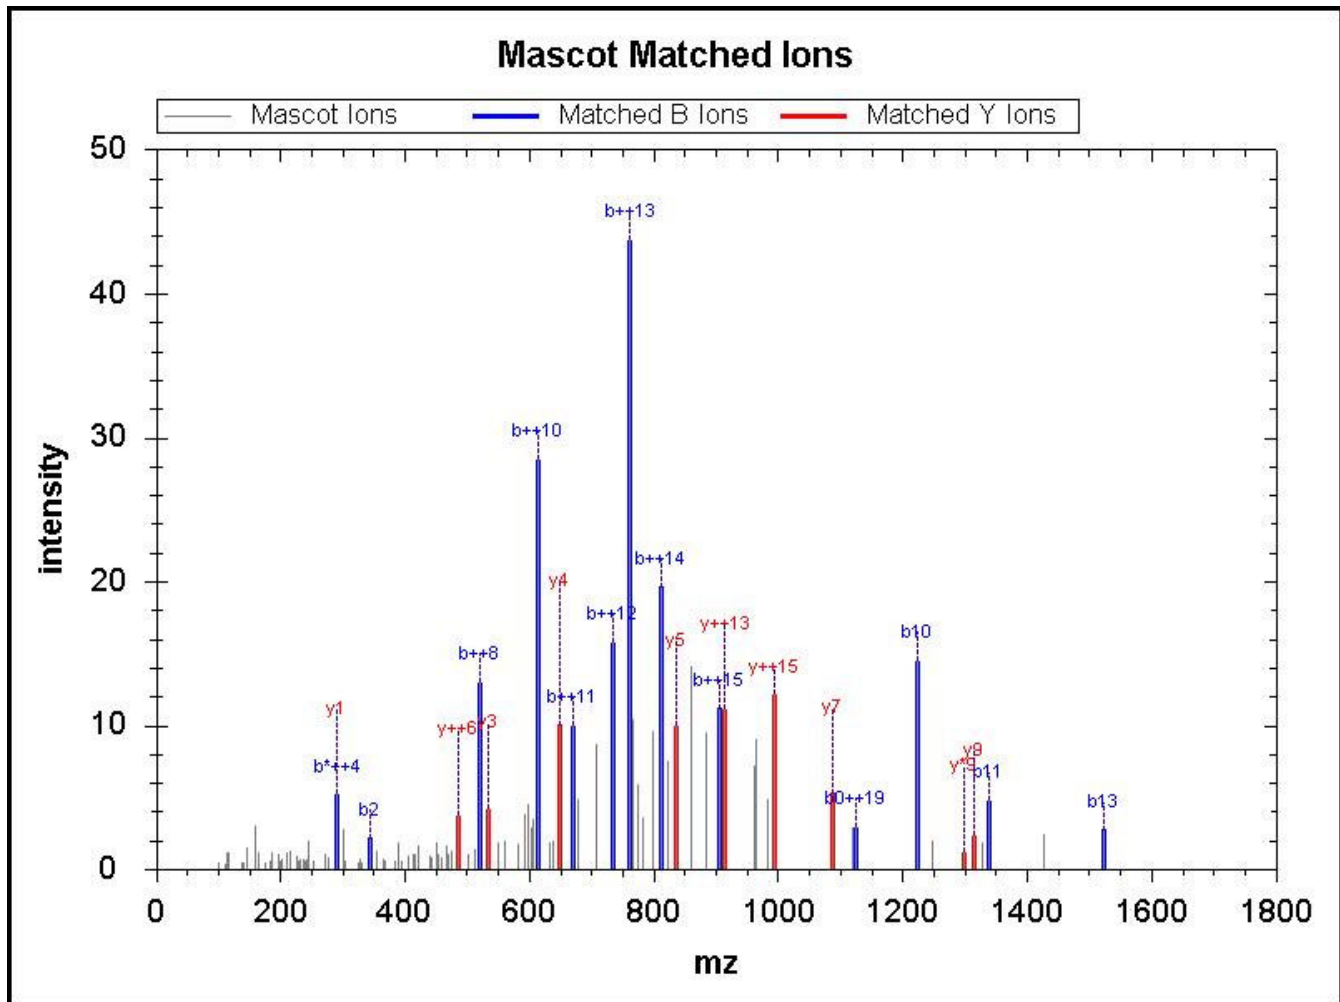

| No | b        | b++    | b*       | b*++   | b0       | b0++   | Seq | y        | y++      | y*       | y*++     | y0       | y0++     | RevNo |
|----|----------|--------|----------|--------|----------|--------|-----|----------|----------|----------|----------|----------|----------|-------|
| 1  | 244.18   | 122.59 |          |        |          |        | V   |          |          |          |          |          |          | 27    |
| 2  | 343.25   | 172.13 |          |        |          |        | V   | 3,205.64 | 1,603.32 | 3,188.61 | 1,594.81 | 3,187.63 | 1,594.32 | 26    |
| 3  | 442.31   | 221.66 |          |        |          |        | V   | 3,106.57 | 1,553.79 | 3,089.54 | 1,545.28 | 3,088.56 | 1,544.78 | 25    |
| 4  | 598.42   | 299.71 | 581.39   | 291.20 |          |        | R   | 3,007.50 | 1,504.25 | 2,990.48 | 1,495.74 | 2,989.49 | 1,495.25 | 24    |
| 5  | 695.47   | 348.24 | 678.44   | 339.72 |          |        | P   | 2,851.40 | 1,426.20 | 2,834.37 | 1,417.69 | 2,833.39 | 1,417.20 | 23    |
| 6  | 794.54   | 397.77 | 777.51   | 389.26 |          |        | V   | 2,754.35 | 1,377.68 | 2,737.32 | 1,369.16 | 2,736.34 | 1,368.67 | 22    |
| 7  | 923.58   | 462.29 | 906.55   | 453.78 | 905.57   | 453.29 | E   | 2,655.28 | 1,328.14 | 2,638.25 | 1,319.63 | 2,637.27 | 1,319.14 | 21    |
| 8  | 1,038.61 | 519.81 | 1,021.58 | 511.29 | 1,020.60 | 510.80 | D   | 2,526.24 | 1,263.62 | 2,509.21 | 1,255.11 | 2,508.23 | 1,254.62 | 20    |
| 9  | 1,095.63 | 548.32 | 1,078.60 | 539.80 | 1,077.62 | 539.31 | G   | 2,411.21 | 1,206.11 | 2,394.18 | 1,197.60 | 2,393.20 | 1,197.10 | 19    |
| 10 | 1,224.67 | 612.84 | 1,207.64 | 604.33 | 1,206.66 | 603.83 | E   | 2,354.19 | 1,177.60 | 2,337.16 | 1,169.09 | 2,336.18 | 1,168.59 | 18    |
| 11 | 1,337.75 | 669.38 | 1,320.73 | 660.87 | 1,319.74 | 660.38 | I   | 2,225.15 | 1,113.08 | 2,208.12 | 1,104.56 | 2,207.14 | 1,104.07 | 17    |
| 12 | 1,465.81 | 733.41 | 1,448.79 | 724.90 | 1,447.80 | 724.40 | Q   | 2,112.06 | 1,056.54 | 2,095.04 | 1,048.02 | 2,094.05 | 1,047.53 | 16    |
| 13 | 1,522.83 | 761.92 | 1,505.81 | 753.41 | 1,504.82 | 752.92 | G   | 1,984.00 | 992.51   | 1,966.98 | 983.99   | 1,965.99 | 983.50   | 15    |
| 14 | 1,621.90 | 811.46 | 1,604.88 | 802.94 | 1,603.89 | 802.45 | V   | 1,926.98 | 964.00   | 1,909.96 | 955.48   | 1,908.97 | 954.99   | 14    |

|    |          |          |          |          |          |          |   |          |        |          |        |          |        |    |
|----|----------|----------|----------|----------|----------|----------|---|----------|--------|----------|--------|----------|--------|----|
| 15 | 1,807.98 | 904.49   | 1,790.96 | 895.98   | 1,789.97 | 895.49   | W | 1,827.91 | 914.46 | 1,810.89 | 905.95 | 1,809.90 | 905.46 | 13 |
| 16 | 1,921.07 | 961.04   | 1,904.04 | 952.52   | 1,903.06 | 952.03   | L | 1,641.84 | 821.42 | 1,624.81 | 812.91 | 1,623.82 | 812.42 | 12 |
| 17 | 2,034.15 | 1,017.58 | 2,017.12 | 1,009.07 | 2,016.14 | 1,008.57 | L | 1,528.75 | 764.88 | 1,511.72 | 756.37 | 1,510.74 | 755.87 | 11 |
| 18 | 2,135.20 | 1,068.10 | 2,118.17 | 1,059.59 | 2,117.19 | 1,059.10 | T | 1,415.67 | 708.34 | 1,398.64 | 699.82 | 1,397.66 | 699.33 | 10 |
| 19 | 2,264.24 | 1,132.62 | 2,247.21 | 1,124.11 | 2,246.23 | 1,123.62 | E | 1,314.62 | 657.81 | 1,297.59 | 649.30 | 1,296.61 | 648.81 | 9  |
| 20 | 2,363.31 | 1,182.16 | 2,346.28 | 1,173.64 | 2,345.30 | 1,173.15 | V | 1,185.58 | 593.29 | 1,168.55 | 584.78 | 1,167.57 | 584.29 | 8  |
| 21 | 2,478.34 | 1,239.67 | 2,461.31 | 1,231.16 | 2,460.33 | 1,230.67 | D | 1,086.51 | 543.76 | 1,069.48 | 535.24 | 1,068.50 | 534.75 | 7  |
| 22 | 2,615.39 | 1,308.20 | 2,598.37 | 1,299.69 | 2,597.38 | 1,299.20 | H | 971.48   | 486.24 | 954.45   | 477.73 | 953.47   | 477.24 | 6  |
| 23 | 2,801.47 | 1,401.24 | 2,784.45 | 1,392.73 | 2,783.46 | 1,392.24 | W | 834.42   | 417.71 | 817.40   | 409.20 | 816.41   | 408.71 | 5  |
| 24 | 2,915.52 | 1,458.26 | 2,898.49 | 1,449.75 | 2,897.51 | 1,449.26 | N | 648.34   | 324.68 | 631.32   | 316.16 | 630.33   | 315.67 | 4  |
| 25 | 3,029.56 | 1,515.28 | 3,012.53 | 1,506.77 | 3,011.55 | 1,506.28 | N | 534.30   | 267.65 | 517.27   | 259.14 | 516.29   | 258.65 | 3  |
| 26 | 3,158.60 | 1,579.80 | 3,141.58 | 1,571.29 | 3,140.59 | 1,570.80 | E | 420.26   | 210.63 | 403.23   | 202.12 | 402.25   | 201.63 | 2  |
| 27 |          |          |          |          |          |          | K | 291.21   | 146.11 | 274.19   | 137.60 |          |        | 1  |

Query 69726 Hit 1

MS/MS Fragmentation of **DNTQLLINQLWQLPTER**

Found in **sp|Q15050|RRS1\_HUMAN**, Ribosome biogenesis regulatory protein homolog OS=Homo sapiens GN=RRS1 PE=1 SV=2

Match to Query 69726: 2225.193from(742.7382,3+)

Title: 1006: Sum of 2 scans in range 2354 (rt=62.2203, f=4, i=675) to 2355 (rt=62.2458, f=4, i=676)

[D:\lab212\membrane\Grace\Joyce\iTRAQ\_21\_2.raw]

Data File: Submitted from 20120508-1(merge) by Mascot Daemon on JOYCE-VAIO

Monoisotopic mass of neutral peptide Mr(calc): 2225.193

Variable modifications:

Ions Score: 42.13 Expect: 0.050

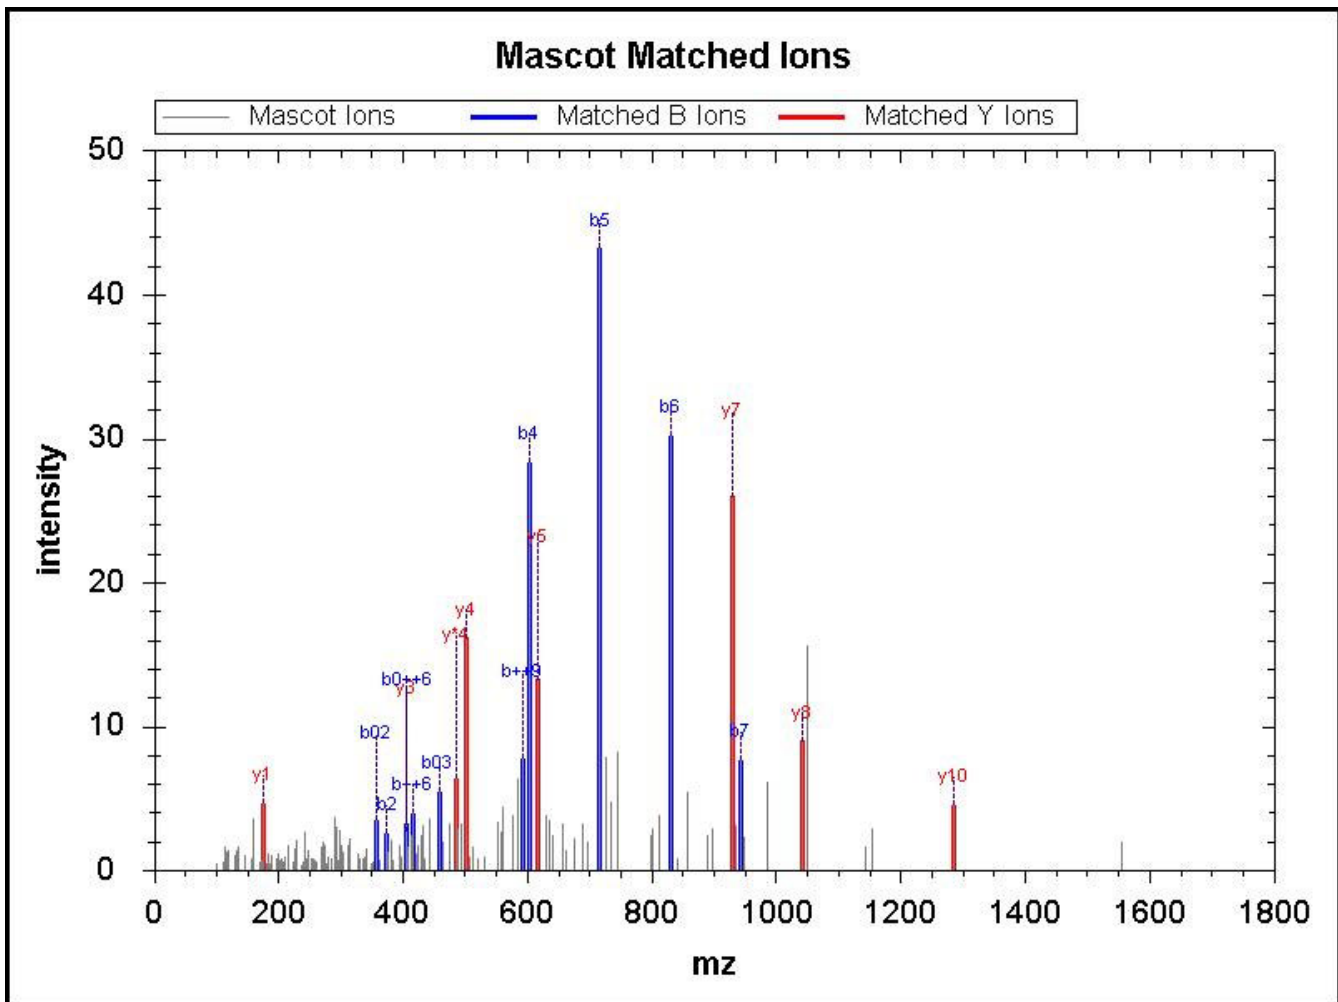

| No | b      | b++    | b* | b*++ | b0     | b0++   | Seq | y | y++ | y* | y*++ | y0 | y0++ | RevNo |
|----|--------|--------|----|------|--------|--------|-----|---|-----|----|------|----|------|-------|
| 1  | 260.14 | 130.57 |    |      | 242.13 | 121.57 | D   |   |     |    |      |    |      | 17    |

|    |          |          |          |          |          |          |   |          |        |          |        |          |        |    |
|----|----------|----------|----------|----------|----------|----------|---|----------|--------|----------|--------|----------|--------|----|
| 2  | 374.18   | 187.59   | 357.15   | 179.08   | 356.17   | 178.59   | N | 1,967.07 | 984.04 | 1,950.04 | 975.53 | 1,949.06 | 975.03 | 16 |
| 3  | 475.23   | 238.12   | 458.20   | 229.60   | 457.22   | 229.11   | T | 1,853.03 | 927.02 | 1,836.00 | 918.50 | 1,835.02 | 918.01 | 15 |
| 4  | 603.29   | 302.15   | 586.26   | 293.63   | 585.27   | 293.14   | Q | 1,751.98 | 876.49 | 1,734.95 | 867.98 | 1,733.97 | 867.49 | 14 |
| 5  | 716.37   | 358.69   | 699.34   | 350.18   | 698.36   | 349.68   | L | 1,623.92 | 812.46 | 1,606.90 | 803.95 | 1,605.91 | 803.46 | 13 |
| 6  | 829.45   | 415.23   | 812.43   | 406.72   | 811.44   | 406.23   | L | 1,510.84 | 755.92 | 1,493.81 | 747.41 | 1,492.83 | 746.92 | 12 |
| 7  | 942.54   | 471.77   | 925.51   | 463.26   | 924.53   | 462.77   | I | 1,397.75 | 699.38 | 1,380.73 | 690.87 | 1,379.74 | 690.38 | 11 |
| 8  | 1,056.58 | 528.79   | 1,039.55 | 520.28   | 1,038.57 | 519.79   | N | 1,284.67 | 642.84 | 1,267.64 | 634.33 | 1,266.66 | 633.83 | 10 |
| 9  | 1,184.64 | 592.82   | 1,167.61 | 584.31   | 1,166.63 | 583.82   | Q | 1,170.63 | 585.82 | 1,153.60 | 577.30 | 1,152.62 | 576.81 | 9  |
| 10 | 1,297.72 | 649.37   | 1,280.70 | 640.85   | 1,279.71 | 640.36   | L | 1,042.57 | 521.79 | 1,025.54 | 513.27 | 1,024.56 | 512.78 | 8  |
| 11 | 1,483.80 | 742.40   | 1,466.78 | 733.89   | 1,465.79 | 733.40   | W | 929.48   | 465.25 | 912.46   | 456.73 | 911.47   | 456.24 | 7  |
| 12 | 1,611.86 | 806.43   | 1,594.83 | 797.92   | 1,593.85 | 797.43   | Q | 743.40   | 372.21 | 726.38   | 363.69 | 725.39   | 363.20 | 6  |
| 13 | 1,724.95 | 862.98   | 1,707.92 | 854.46   | 1,706.93 | 853.97   | L | 615.35   | 308.18 | 598.32   | 299.66 | 597.34   | 299.17 | 5  |
| 14 | 1,822.00 | 911.50   | 1,804.97 | 902.99   | 1,803.99 | 902.50   | P | 502.26   | 251.63 | 485.24   | 243.12 | 484.25   | 242.63 | 4  |
| 15 | 1,923.05 | 962.03   | 1,906.02 | 953.51   | 1,905.04 | 953.02   | T | 405.21   | 203.11 | 388.18   | 194.59 | 387.20   | 194.10 | 3  |
| 16 | 2,052.09 | 1,026.55 | 2,035.06 | 1,018.03 | 2,034.08 | 1,017.54 | E | 304.16   | 152.58 | 287.13   | 144.07 | 286.15   | 143.58 | 2  |
| 17 |          |          |          |          |          |          | R | 175.12   | 88.06  | 158.09   | 79.55  |          |        | 1  |

Query 34169 Hit 1

MS/MS Fragmentation of DTGQLYAALHHR

Found in sp|Q9H6Z4|RANB3\_HUMAN, Ran-binding protein 3 OS=Homo sapiens GN=RANBP3 PE=1 SV=1

Match to Query 34169: 1524.795from(509.2722,3+)

Title: 345: Scan 789 (rt=27.4434, f=3, i=117) [D:\lab212\membrane\Grace\Joyce\iTRAQ\_50\_1.raw]

Data File: Submitted from 20120508-1(merge) by Mascot Daemon on JOYCE-VAIO

Monoisotopic mass of neutral peptide Mr(calc): 1524.795

Variable modifications:

Ions Score: 42.12 Expect: 0.051

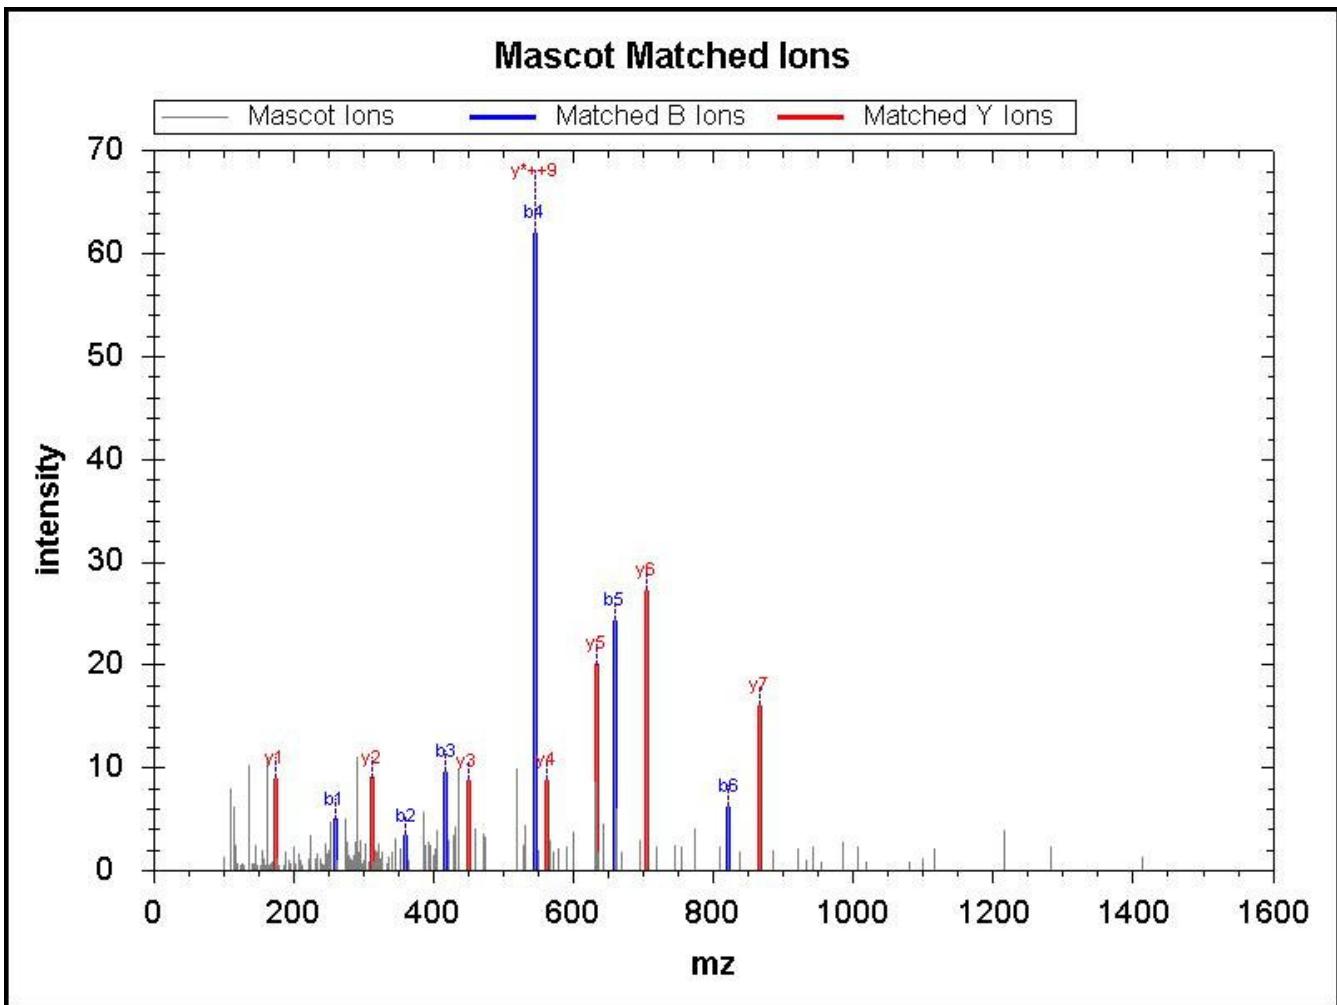

| No | b        | b++    | b*       | b*++   | b0       | b0++   | Seq | y        | y++    | y*       | y*++   | y0       | y0++   | RevNo |
|----|----------|--------|----------|--------|----------|--------|-----|----------|--------|----------|--------|----------|--------|-------|
| 1  | 260.14   | 130.57 |          |        | 242.13   | 121.57 | D   |          |        |          |        |          |        | 12    |
| 2  | 361.18   | 181.10 |          |        | 343.17   | 172.09 | T   | 1,266.67 | 633.84 | 1,249.64 | 625.33 | 1,248.66 | 624.83 | 11    |
| 3  | 418.21   | 209.61 |          |        | 400.19   | 200.60 | G   | 1,165.62 | 583.31 | 1,148.60 | 574.80 |          |        | 10    |
| 4  | 546.26   | 273.64 | 529.24   | 265.12 | 528.25   | 264.63 | Q   | 1,108.60 | 554.80 | 1,091.57 | 546.29 |          |        | 9     |
| 5  | 659.35   | 330.18 | 642.32   | 321.66 | 641.34   | 321.17 | L   | 980.54   | 490.77 | 963.52   | 482.26 |          |        | 8     |
| 6  | 822.41   | 411.71 | 805.38   | 403.20 | 804.40   | 402.70 | Y   | 867.46   | 434.23 | 850.43   | 425.72 |          |        | 7     |
| 7  | 893.45   | 447.23 | 876.42   | 438.71 | 875.44   | 438.22 | A   | 704.40   | 352.70 | 687.37   | 344.19 |          |        | 6     |
| 8  | 964.49   | 482.75 | 947.46   | 474.23 | 946.47   | 473.74 | A   | 633.36   | 317.18 | 616.33   | 308.67 |          |        | 5     |
| 9  | 1,077.57 | 539.29 | 1,060.54 | 530.78 | 1,059.56 | 530.28 | L   | 562.32   | 281.66 | 545.29   | 273.15 |          |        | 4     |
| 10 | 1,214.63 | 607.82 | 1,197.60 | 599.30 | 1,196.62 | 598.81 | H   | 449.24   | 225.12 | 432.21   | 216.61 |          |        | 3     |
| 11 | 1,351.69 | 676.35 | 1,334.66 | 667.83 | 1,333.68 | 667.34 | H   | 312.18   | 156.59 | 295.15   | 148.08 |          |        | 2     |
| 12 |          |        |          |        |          |        | R   | 175.12   | 88.06  | 158.09   | 79.55  |          |        | 1     |

Query 76935 Hit 1

MS/MS Fragmentation of **SLTPAVPVESKPKDKPSGK**

Found in **sp|P20810|ICAL\_HUMAN**, Calpastatin OS=Homo sapiens GN=CAST PE=1 SV=4

Match to Query 76935: 2412.407 from (604.109,4+)

Title: 311: Scan 720 (rt=25.8852, f=2, i=115) [D:\lab212\membrane\Grace\Joyce\iTRAQ\_50\_1.raw]

Data File: Submitted from 20120508-1(merge) by Mascot Daemon on JOYCE-VAIO

Monoisotopic mass of neutral peptide Mr(calc): 2412.407

Variable modifications:

K11 iTRAQ4plex (K)

K14 iTRAQ4plex (K)

K18 iTRAQ4plex (K)

Ions Score: 42.12 Expect: 0.016



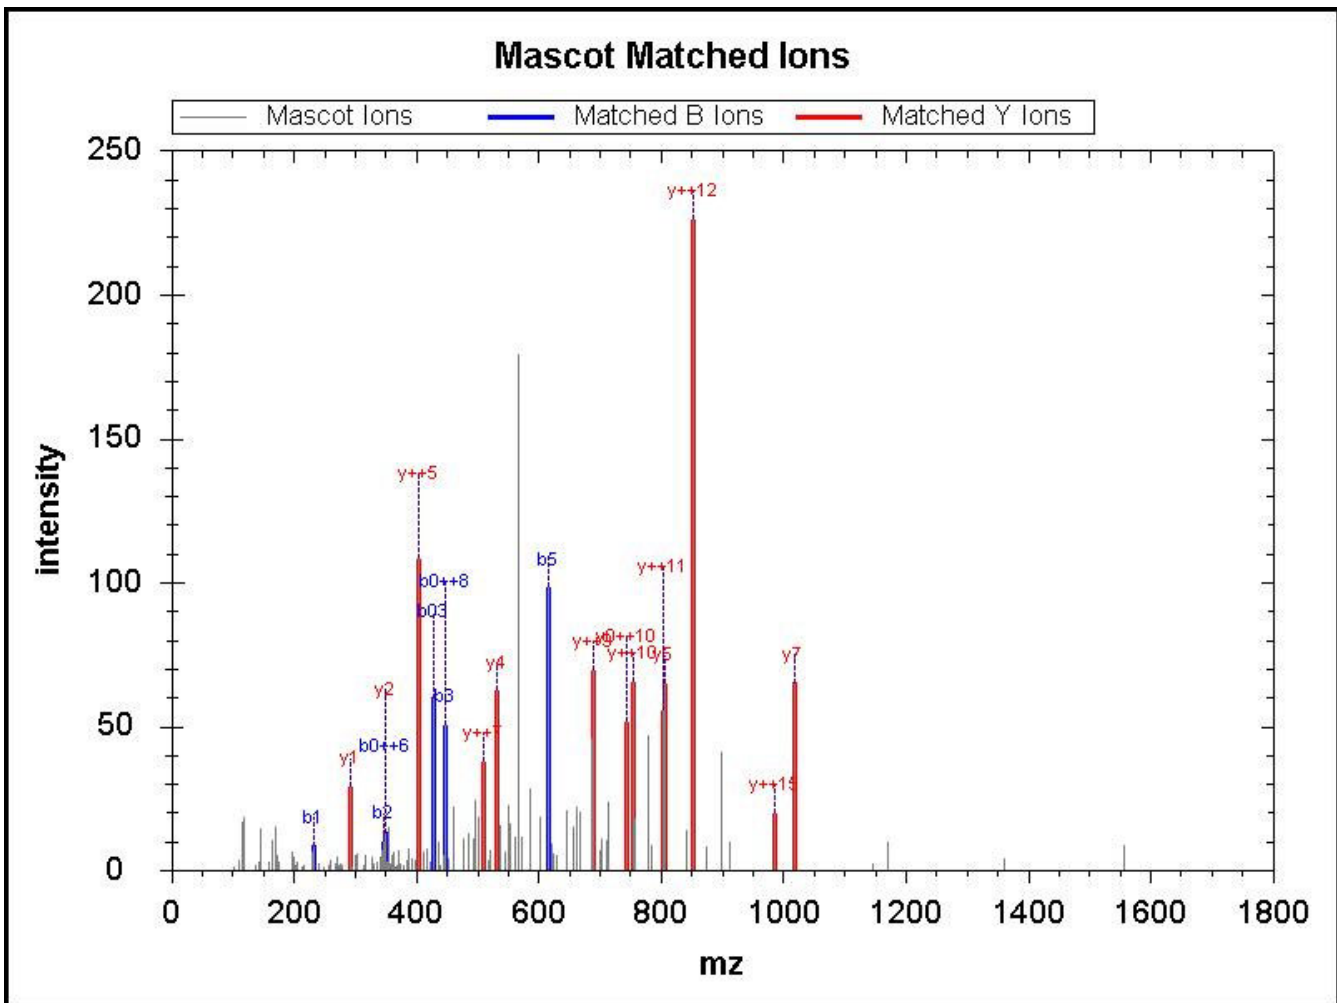

| No | b        | b++      | b*       | b*++     | b0       | b0++     | Seq | y        | y++      | y*       | y*++     | y0       | y0++     | RevNo |
|----|----------|----------|----------|----------|----------|----------|-----|----------|----------|----------|----------|----------|----------|-------|
| 1  | 232.14   | 116.57   |          |          | 214.13   | 107.57   | S   |          |          |          |          |          |          | 18    |
| 2  | 345.23   | 173.12   |          |          | 327.21   | 164.11   | L   | 2,182.28 | 1,091.64 | 2,165.25 | 1,083.13 | 2,164.27 | 1,082.64 | 17    |
| 3  | 446.27   | 223.64   |          |          | 428.26   | 214.63   | T   | 2,069.20 | 1,035.10 | 2,052.17 | 1,026.59 | 2,051.19 | 1,026.10 | 16    |
| 4  | 543.33   | 272.17   |          |          | 525.32   | 263.16   | P   | 1,968.15 | 984.58   | 1,951.12 | 976.06   | 1,950.14 | 975.57   | 15    |
| 5  | 614.36   | 307.69   |          |          | 596.35   | 298.68   | A   | 1,871.10 | 936.05   | 1,854.07 | 927.54   | 1,853.09 | 927.05   | 14    |
| 6  | 713.43   | 357.22   |          |          | 695.42   | 348.21   | V   | 1,800.06 | 900.53   | 1,783.03 | 892.02   | 1,782.05 | 891.53   | 13    |
| 7  | 810.48   | 405.75   |          |          | 792.47   | 396.74   | P   | 1,700.99 | 851.00   | 1,683.96 | 842.49   | 1,682.98 | 841.99   | 12    |
| 8  | 909.55   | 455.28   |          |          | 891.54   | 446.27   | V   | 1,603.94 | 802.47   | 1,586.91 | 793.96   | 1,585.93 | 793.47   | 11    |
| 9  | 1,038.60 | 519.80   |          |          | 1,020.58 | 510.80   | E   | 1,504.87 | 752.94   | 1,487.84 | 744.43   | 1,486.86 | 743.93   | 10    |
| 10 | 1,125.63 | 563.32   |          |          | 1,107.62 | 554.31   | S   | 1,375.83 | 688.42   | 1,358.80 | 679.90   | 1,357.82 | 679.41   | 9     |
| 11 | 1,397.82 | 699.42   | 1,380.80 | 690.90   | 1,379.81 | 690.41   | K   | 1,288.79 | 644.90   | 1,271.77 | 636.39   | 1,270.78 | 635.90   | 8     |
| 12 | 1,494.88 | 747.94   | 1,477.85 | 739.43   | 1,476.87 | 738.94   | P   | 1,016.60 | 508.80   | 999.57   | 500.29   | 998.59   | 499.80   | 7     |
| 13 | 1,609.90 | 805.46   | 1,592.88 | 796.94   | 1,591.89 | 796.45   | D   | 919.54   | 460.28   | 902.52   | 451.76   | 901.53   | 451.27   | 6     |
| 14 | 1,882.10 | 941.55   | 1,865.07 | 933.04   | 1,864.09 | 932.55   | K   | 804.52   | 402.76   | 787.49   | 394.25   | 786.51   | 393.76   | 5     |
| 15 | 1,979.15 | 990.08   | 1,962.13 | 981.57   | 1,961.14 | 981.08   | P   | 532.32   | 266.66   | 515.29   | 258.15   | 514.31   | 257.66   | 4     |
| 16 | 2,066.19 | 1,033.60 | 2,049.16 | 1,025.08 | 2,048.18 | 1,024.59 | S   | 435.27   | 218.14   | 418.24   | 209.62   | 417.26   | 209.13   | 3     |
| 17 | 2,123.21 | 1,062.11 | 2,106.18 | 1,053.59 | 2,105.20 | 1,053.10 | G   | 348.24   | 174.62   | 331.21   | 166.11   |          |          | 2     |
| 18 |          |          |          |          |          |          | K   | 291.21   | 146.11   | 274.19   | 137.60   |          |          | 1     |

Query 19218 Hit 1

MS/MS Fragmentation of EGFLESFK

Found in sp|Q15070|OXA1L\_HUMAN, Mitochondrial inner membrane protein OXA1L OS=Homo sapiens GN=OXA1L PE=1 SV=3

Match to Query 19218: 1243.674 from (622.8442, 2+)

Title: 637: Scan 1446 (rt=41.9401, f=3, i=217) [D:\lab212\membrane\Grace\Joyce\iTRAQ\_31\_1.raw]

Data File:Submitted from 20120508-1(merge) by Mascot Daemon on JOYCE-VAIO  
 Monoisotopic mass of neutral peptide Mr(calc): 1243.674  
 Variable modifications:  
 K8 iTRAQ4plex (K)  
 Ions Score: 42.11 Expect: 0.046

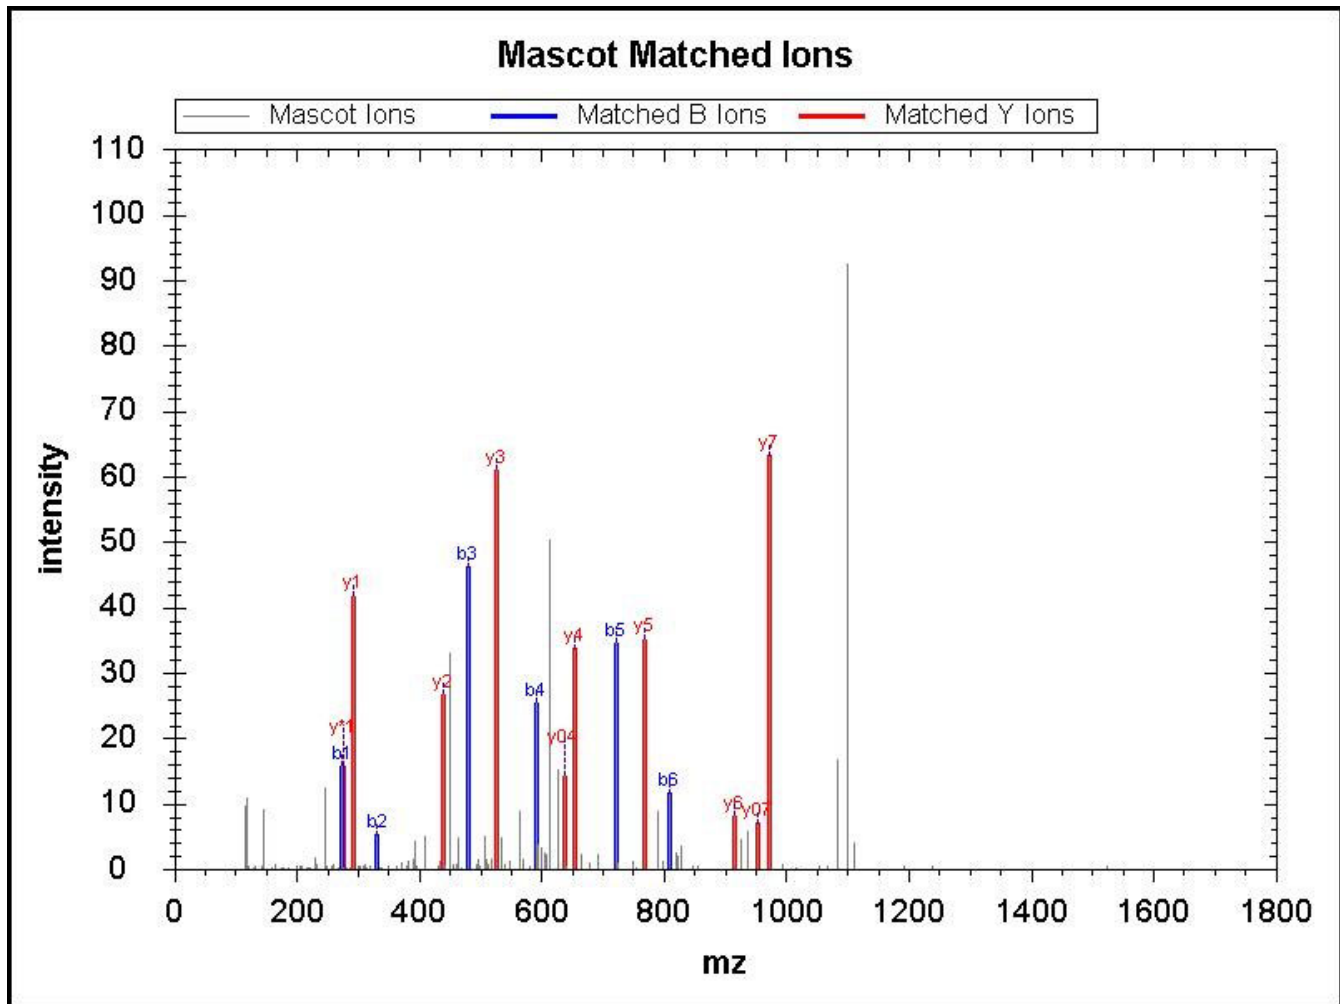

| No | b      | b++    | b0     | b0++   | Seq | y      | y++    | y*     | y*++   | y0     | y0++   | RevNo |
|----|--------|--------|--------|--------|-----|--------|--------|--------|--------|--------|--------|-------|
| 1  | 274.15 | 137.58 | 256.14 | 128.57 | E   |        |        |        |        |        |        | 8     |
| 2  | 331.17 | 166.09 | 313.16 | 157.09 | G   | 971.53 | 486.27 | 954.51 | 477.76 | 953.52 | 477.26 | 7     |
| 3  | 478.24 | 239.62 | 460.23 | 230.62 | F   | 914.51 | 457.76 | 897.48 | 449.25 | 896.50 | 448.75 | 6     |
| 4  | 591.33 | 296.17 | 573.32 | 287.16 | L   | 767.44 | 384.22 | 750.42 | 375.71 | 749.43 | 375.22 | 5     |
| 5  | 720.37 | 360.69 | 702.36 | 351.68 | E   | 654.36 | 327.68 | 637.33 | 319.17 | 636.35 | 318.68 | 4     |
| 6  | 807.40 | 404.20 | 789.39 | 395.20 | S   | 525.32 | 263.16 | 508.29 | 254.65 | 507.30 | 254.16 | 3     |
| 7  | 954.47 | 477.74 | 936.46 | 468.73 | F   | 438.28 | 219.65 | 421.26 | 211.13 |        |        | 2     |
| 8  |        |        |        |        | K   | 291.21 | 146.11 | 274.19 | 137.60 |        |        | 1     |

Query 95548 Hit 1

MS/MS Fragmentation of **LQLVGSGLHEAEAAAGEAQQAVLEGLQGLLSR**

Found in **sp|Q99K41|EMIL1\_MOUSE**, EMILIN-1 OS=Mus musculus GN=Emilin1 PE=1 SV=1

Match to Query 95548: 3287.753from(822.9454,4+)

Title: 1183: Sum of 2 scans in range 2705 (rt=69.7515, f=2, i=425) to 2706 (rt=69.7769, f=2, i=426)

[D:\lab212\membrane\GraceJoyce\iTRAQ\_29\_1.raw]

Data File:Submitted from 20120508-1(merge) by Mascot Daemon on JOYCE-VAIO

Monoisotopic mass of neutral peptide Mr(calc): 3287.753

Variable modifications:

Ions Score: 42.1 Expect: 0.034

### Mascot Matched Ions

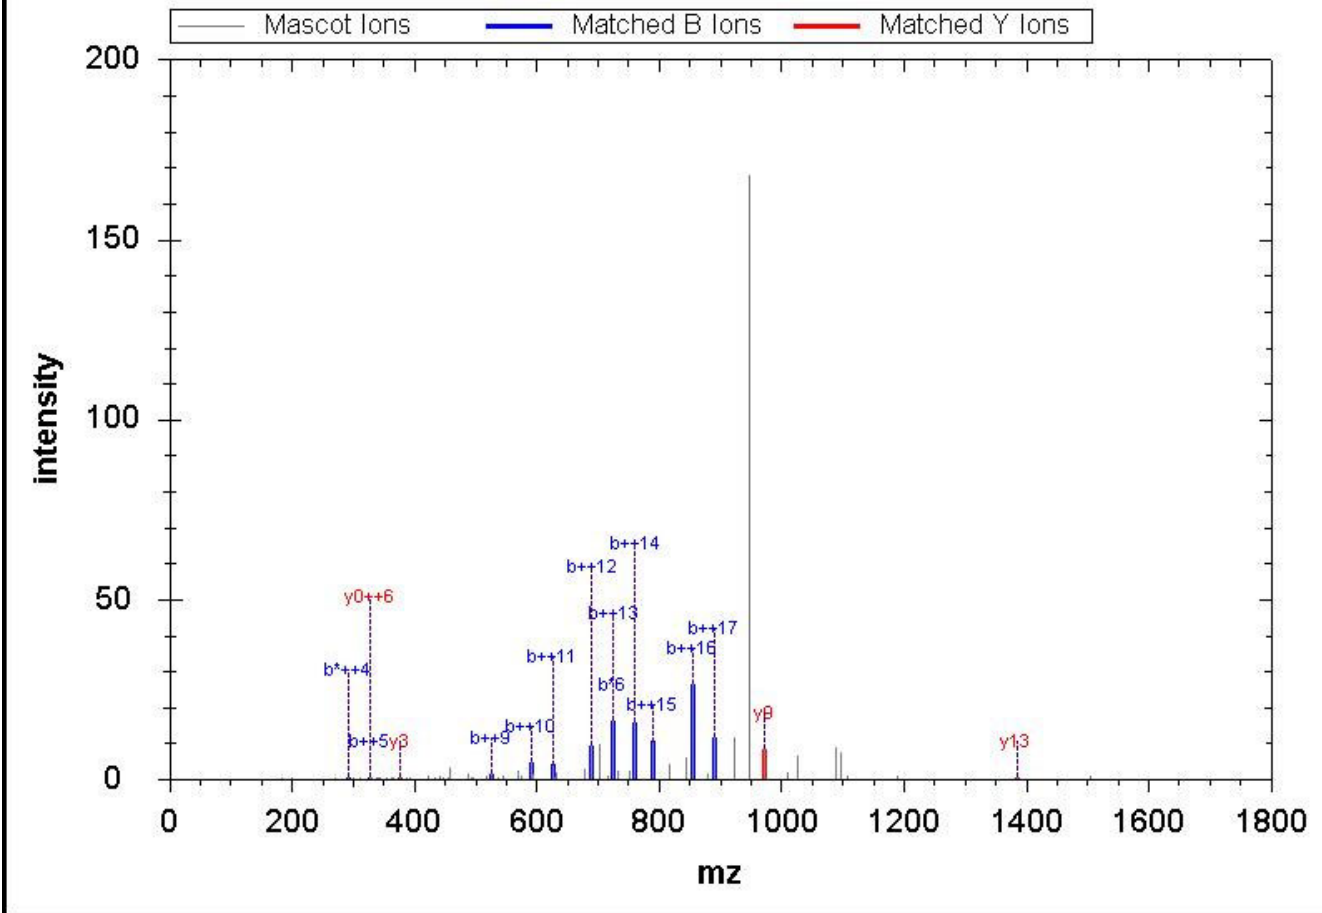

| No | b        | b <sup>++</sup> | b <sup>*</sup> | b <sup>+++</sup> | b <sup>0</sup> | b <sup>0++</sup> | Seq | y        | y <sup>++</sup> | y <sup>*</sup> | y <sup>+++</sup> | y <sup>0</sup> | y <sup>0++</sup> | RevNo |
|----|----------|-----------------|----------------|------------------|----------------|------------------|-----|----------|-----------------|----------------|------------------|----------------|------------------|-------|
| 1  | 258.19   | 129.60          |                |                  |                |                  | L   |          |                 |                |                  |                |                  | 31    |
| 2  | 386.25   | 193.63          | 369.23         | 185.12           |                |                  | Q   | 3,031.58 | 1,516.29        | 3,014.55       | 1,507.78         | 3,013.57       | 1,507.29         | 30    |
| 3  | 499.34   | 250.17          | 482.31         | 241.66           |                |                  | L   | 2,903.52 | 1,452.26        | 2,886.50       | 1,443.75         | 2,885.51       | 1,443.26         | 29    |
| 4  | 598.40   | 299.71          | 581.38         | 291.19           |                |                  | V   | 2,790.44 | 1,395.72        | 2,773.41       | 1,387.21         | 2,772.43       | 1,386.72         | 28    |
| 5  | 655.43   | 328.22          | 638.40         | 319.70           |                |                  | G   | 2,691.37 | 1,346.19        | 2,674.34       | 1,337.68         | 2,673.36       | 1,337.18         | 27    |
| 6  | 742.46   | 371.73          | 725.43         | 363.22           | 724.45         | 362.73           | S   | 2,634.35 | 1,317.68        | 2,617.32       | 1,309.16         | 2,616.34       | 1,308.67         | 26    |
| 7  | 799.48   | 400.24          | 782.45         | 391.73           | 781.47         | 391.24           | G   | 2,547.32 | 1,274.16        | 2,530.29       | 1,265.65         | 2,529.31       | 1,265.16         | 25    |
| 8  | 912.56   | 456.79          | 895.54         | 448.27           | 894.55         | 447.78           | L   | 2,490.29 | 1,245.65        | 2,473.27       | 1,237.14         | 2,472.28       | 1,236.65         | 24    |
| 9  | 1,049.62 | 525.31          | 1,032.60       | 516.80           | 1,031.61       | 516.31           | H   | 2,377.21 | 1,189.11        | 2,360.18       | 1,180.60         | 2,359.20       | 1,180.10         | 23    |
| 10 | 1,178.67 | 589.84          | 1,161.64       | 581.32           | 1,160.65       | 580.83           | E   | 2,240.15 | 1,120.58        | 2,223.13       | 1,112.07         | 2,222.14       | 1,111.57         | 22    |
| 11 | 1,249.70 | 625.35          | 1,232.68       | 616.84           | 1,231.69       | 616.35           | A   | 2,111.11 | 1,056.06        | 2,094.08       | 1,047.54         | 2,093.10       | 1,047.05         | 21    |
| 12 | 1,378.74 | 689.88          | 1,361.72       | 681.36           | 1,360.73       | 680.87           | E   | 2,040.07 | 1,020.54        | 2,023.05       | 1,012.03         | 2,022.06       | 1,011.53         | 20    |
| 13 | 1,449.78 | 725.39          | 1,432.76       | 716.88           | 1,431.77       | 716.39           | A   | 1,911.03 | 956.02          | 1,894.00       | 947.51           | 1,893.02       | 947.01           | 19    |
| 14 | 1,520.82 | 760.91          | 1,503.79       | 752.40           | 1,502.81       | 751.91           | A   | 1,839.99 | 920.50          | 1,822.97       | 911.99           | 1,821.98       | 911.49           | 18    |
| 15 | 1,577.84 | 789.42          | 1,560.81       | 780.91           | 1,559.83       | 780.42           | G   | 1,768.96 | 884.98          | 1,751.93       | 876.47           | 1,750.94       | 875.98           | 17    |
| 16 | 1,706.88 | 853.95          | 1,689.86       | 845.43           | 1,688.87       | 844.94           | E   | 1,711.93 | 856.47          | 1,694.91       | 847.96           | 1,693.92       | 847.47           | 16    |
| 17 | 1,777.92 | 889.46          | 1,760.89       | 880.95           | 1,759.91       | 880.46           | A   | 1,582.89 | 791.95          | 1,565.86       | 783.44           | 1,564.88       | 782.94           | 15    |
| 18 | 1,905.98 | 953.49          | 1,888.95       | 944.98           | 1,887.97       | 944.49           | Q   | 1,511.85 | 756.43          | 1,494.83       | 747.92           | 1,493.84       | 747.43           | 14    |
| 19 | 2,034.04 | 1,017.52        | 2,017.01       | 1,009.01         | 2,016.03       | 1,008.52         | Q   | 1,383.80 | 692.40          | 1,366.77       | 683.89           | 1,365.78       | 683.40           | 13    |
| 20 | 2,105.07 | 1,053.04        | 2,088.05       | 1,044.53         | 2,087.06       | 1,044.04         | A   | 1,255.74 | 628.37          | 1,238.71       | 619.86           | 1,237.73       | 619.37           | 12    |
| 21 | 2,204.14 | 1,102.58        | 2,187.12       | 1,094.06         | 2,186.13       | 1,093.57         | V   | 1,184.70 | 592.85          | 1,167.67       | 584.34           | 1,166.69       | 583.85           | 11    |
| 22 | 2,317.23 | 1,159.12        | 2,300.20       | 1,150.60         | 2,299.22       | 1,150.11         | L   | 1,085.63 | 543.32          | 1,068.60       | 534.81           | 1,067.62       | 534.31           | 10    |
| 23 | 2,446.27 | 1,223.64        | 2,429.24       | 1,215.13         | 2,428.26       | 1,214.63         | E   | 972.55   | 486.78          | 955.52         | 478.26           | 954.54         | 477.77           | 9     |

|    |          |          |          |          |          |          |   |        |        |        |        |        |        |   |
|----|----------|----------|----------|----------|----------|----------|---|--------|--------|--------|--------|--------|--------|---|
| 24 | 2,503.29 | 1,252.15 | 2,486.26 | 1,243.64 | 2,485.28 | 1,243.14 | G | 843.50 | 422.26 | 826.48 | 413.74 | 825.49 | 413.25 | 8 |
| 25 | 2,616.37 | 1,308.69 | 2,599.35 | 1,300.18 | 2,598.36 | 1,299.69 | L | 786.48 | 393.75 | 769.46 | 385.23 | 768.47 | 384.74 | 7 |
| 26 | 2,744.43 | 1,372.72 | 2,727.41 | 1,364.21 | 2,726.42 | 1,363.72 | Q | 673.40 | 337.20 | 656.37 | 328.69 | 655.39 | 328.20 | 6 |
| 27 | 2,801.45 | 1,401.23 | 2,784.43 | 1,392.72 | 2,783.44 | 1,392.23 | G | 545.34 | 273.17 | 528.31 | 264.66 | 527.33 | 264.17 | 5 |
| 28 | 2,914.54 | 1,457.77 | 2,897.51 | 1,449.26 | 2,896.53 | 1,448.77 | L | 488.32 | 244.66 | 471.29 | 236.15 | 470.31 | 235.66 | 4 |
| 29 | 3,027.62 | 1,514.32 | 3,010.60 | 1,505.80 | 3,009.61 | 1,505.31 | L | 375.24 | 188.12 | 358.21 | 179.61 | 357.22 | 179.12 | 3 |
| 30 | 3,114.65 | 1,557.83 | 3,097.63 | 1,549.32 | 3,096.64 | 1,548.83 | S | 262.15 | 131.58 | 245.12 | 123.07 | 244.14 | 122.57 | 2 |
| 31 |          |          |          |          |          |          | R | 175.12 | 88.06  | 158.09 | 79.55  |        |        | 1 |

Query 46899 Hit 1

MS/MS Fragmentation of **AFDLIVDRPVTLV**R

Found in [sp|O96000|NDUBA\\_HUMAN](#), NADH dehydrogenase [ubiquinone] 1 beta subcomplex subunit 10 OS=Homo sapiens  
GN=NDUFB10 PE=1 SV=3

Match to Query 46899: 1757.029from(586.6835,3+)

Title: 700: Scan 1752 (rt=47.9255, f=2, i=247) [D:\lab212\membrane\Grace\Joyce\iTRAQ\_34\_1.raw]

Data File: Submitted from 20120508-1(merge) by Mascot Daemon on JOYCE-VAIO

Monoisotopic mass of neutral peptide Mr(calc): 1757.029

Variable modifications:

Ions Score: 42.08 Expect: 0.030

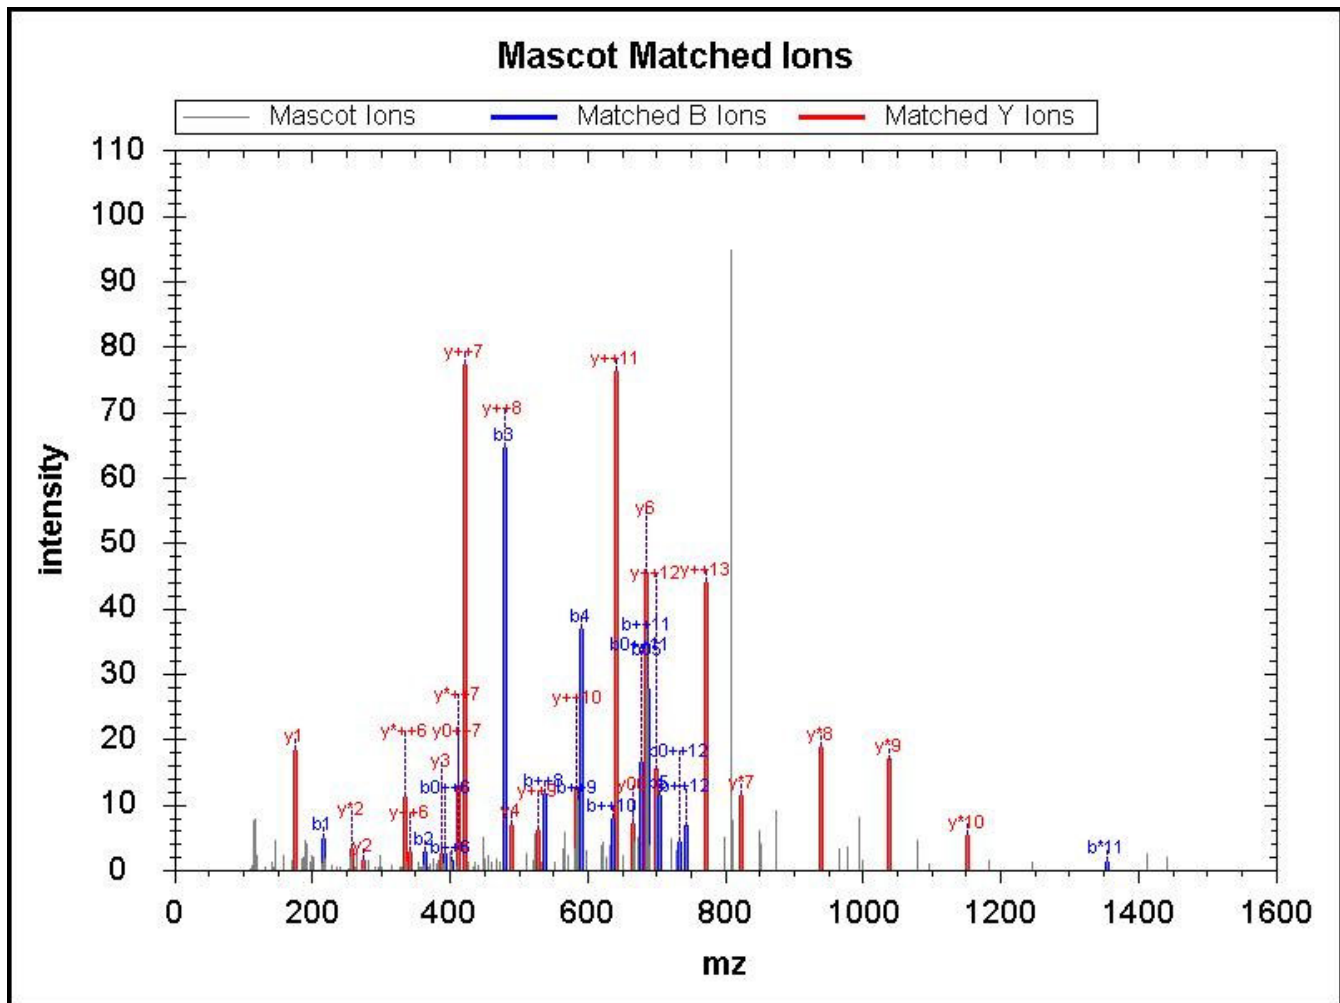

| No | b      | b++    | b* | b*++ | b0     | b0++   | Seq | y        | y++    | y*       | y*++   | y0       | y0++   | RevNo |
|----|--------|--------|----|------|--------|--------|-----|----------|--------|----------|--------|----------|--------|-------|
| 1  | 216.15 | 108.58 |    |      |        |        | A   |          |        |          |        |          |        | 14    |
| 2  | 363.21 | 182.11 |    |      |        |        | F   | 1,542.90 | 771.95 | 1,525.87 | 763.44 | 1,524.89 | 762.95 | 13    |
| 3  | 478.24 | 239.62 |    |      | 460.23 | 230.62 | D   | 1,395.83 | 698.42 | 1,378.81 | 689.91 | 1,377.82 | 689.41 | 12    |
| 4  | 591.33 | 296.17 |    |      | 573.32 | 287.16 | L   | 1,280.80 | 640.91 | 1,263.78 | 632.39 | 1,262.79 | 631.90 | 11    |
| 5  | 704.41 | 352.71 |    |      | 686.40 | 343.70 | I   | 1,167.72 | 584.36 | 1,150.69 | 575.85 | 1,149.71 | 575.36 | 10    |
| 6  | 803.48 | 402.24 |    |      | 785.47 | 393.24 | V   | 1,054.64 | 527.82 | 1,037.61 | 519.31 | 1,036.63 | 518.82 | 9     |

|    |          |        |          |        |          |        |   |        |        |        |        |        |        |   |
|----|----------|--------|----------|--------|----------|--------|---|--------|--------|--------|--------|--------|--------|---|
| 7  | 918.51   | 459.76 |          |        | 900.49   | 450.75 | D | 955.57 | 478.29 | 938.54 | 469.77 | 937.56 | 469.28 | 8 |
| 8  | 1,074.61 | 537.81 | 1,057.58 | 529.29 | 1,056.60 | 528.80 | R | 840.54 | 420.77 | 823.51 | 412.26 | 822.53 | 411.77 | 7 |
| 9  | 1,171.66 | 586.33 | 1,154.63 | 577.82 | 1,153.65 | 577.33 | P | 684.44 | 342.72 | 667.41 | 334.21 | 666.43 | 333.72 | 6 |
| 10 | 1,270.73 | 635.87 | 1,253.70 | 627.35 | 1,252.72 | 626.86 | V | 587.39 | 294.20 | 570.36 | 285.68 | 569.38 | 285.19 | 5 |
| 11 | 1,371.78 | 686.39 | 1,354.75 | 677.88 | 1,353.76 | 677.39 | T | 488.32 | 244.66 | 471.29 | 236.15 | 470.31 | 235.66 | 4 |
| 12 | 1,484.86 | 742.93 | 1,467.83 | 734.42 | 1,466.85 | 733.93 | L | 387.27 | 194.14 | 370.24 | 185.63 |        |        | 3 |
| 13 | 1,583.93 | 792.47 | 1,566.90 | 783.95 | 1,565.92 | 783.46 | V | 274.19 | 137.60 | 257.16 | 129.08 |        |        | 2 |
| 14 |          |        |          |        |          |        | R | 175.12 | 88.06  | 158.09 | 79.55  |        |        | 1 |

Query 35248 Hit 1

MS/MS Fragmentation of **SLLSMLVEVHK**

Found in **sp|O75976|CBPD\_HUMAN**, Carboxypeptidase D OS=Homo sapiens GN=CPD PE=1 SV=2

Match to Query 35248: 1542.904 from (515.3088, 3+)

Title: 911: Sum of 2 scans in range 1977 (rt=54.2242, f=4, i=609) to 1978 (rt=54.2496, f=4, i=610)

[D:\lab212\membrane\GraceJoyce\iTRAQ\_40\_1.raw]

Data File: Submitted from 20120508-1(merge) by Mascot Daemon on JOYCE-VAIO

Monoisotopic mass of neutral peptide Mr(calc): 1542.904

Variable modifications:

K11 :iTRAQ4plex (K)

Ions Score: 42.06 Expect: 0.034

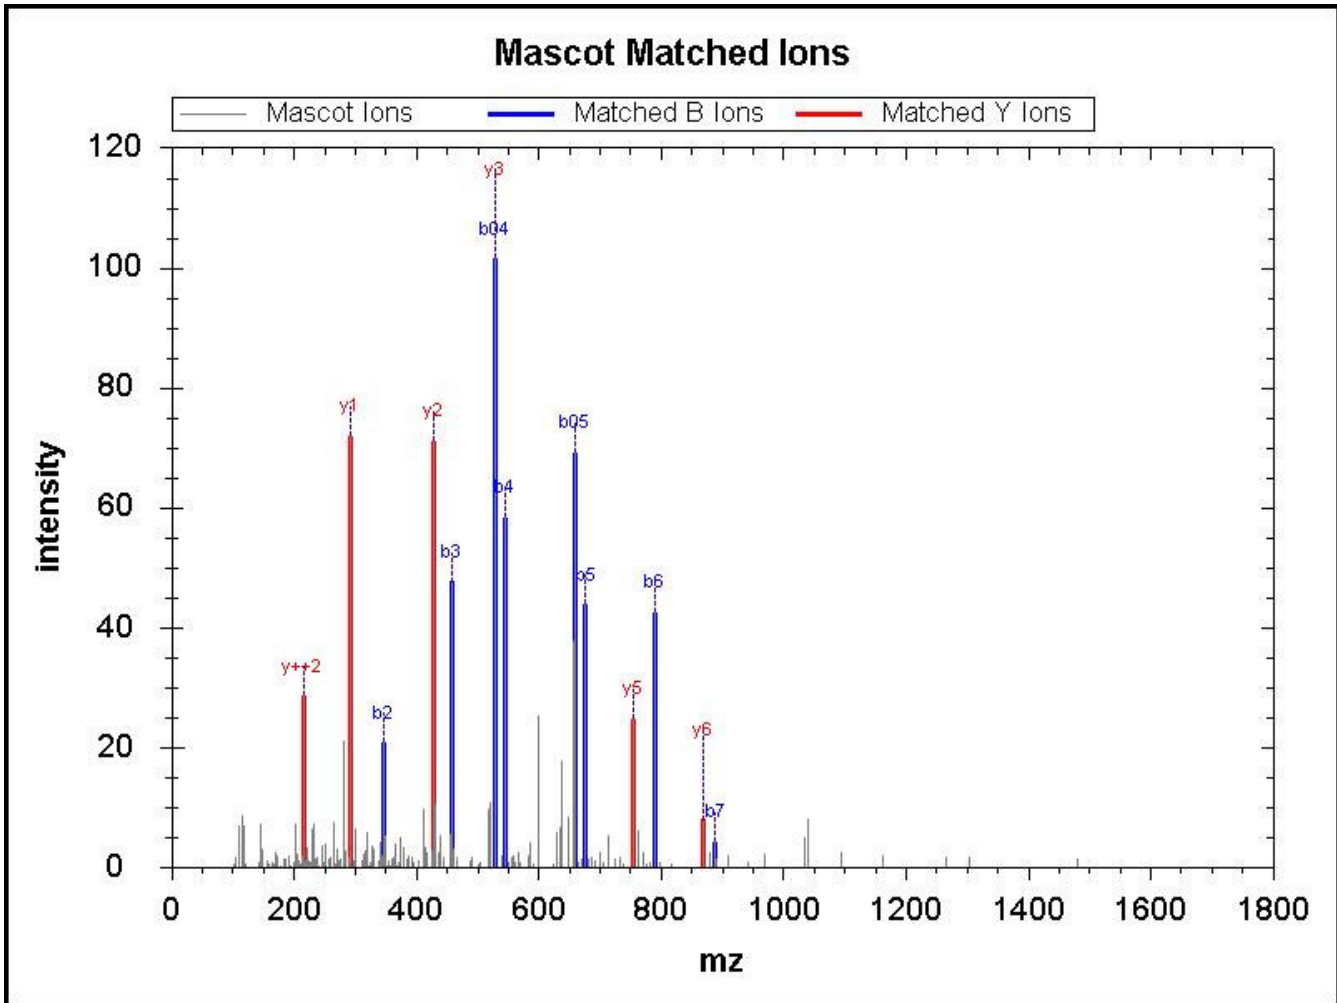

| No | b      | b++    | b0     | b0++   | Seq | y        | y++    | y*       | y*++   | y0       | y0++   | RevNo |
|----|--------|--------|--------|--------|-----|----------|--------|----------|--------|----------|--------|-------|
| 1  | 232.14 | 116.57 | 214.13 | 107.57 | S   |          |        |          |        |          |        | 11    |
| 2  | 345.23 | 173.12 | 327.21 | 164.11 | L   | 1,312.78 | 656.89 | 1,295.75 | 648.38 | 1,294.77 | 647.89 | 10    |
| 3  | 458.31 | 229.66 | 440.30 | 220.65 | L   | 1,199.69 | 600.35 | 1,182.67 | 591.84 | 1,181.68 | 591.35 | 9     |
| 4  | 545.34 | 273.17 | 527.33 | 264.17 | S   | 1,086.61 | 543.81 | 1,069.58 | 535.30 | 1,068.60 | 534.80 | 8     |
| 5  | 676.38 | 338.69 | 658.37 | 329.69 | M   | 999.58   | 500.29 | 982.55   | 491.78 | 981.57   | 491.29 | 7     |

|    |          |        |          |        |   |        |        |        |        |        |        |   |
|----|----------|--------|----------|--------|---|--------|--------|--------|--------|--------|--------|---|
| 6  | 789.47   | 395.24 | 771.46   | 386.23 | L | 868.54 | 434.77 | 851.51 | 426.26 | 850.53 | 425.77 | 6 |
| 7  | 888.53   | 444.77 | 870.52   | 435.77 | V | 755.45 | 378.23 | 738.43 | 369.72 | 737.44 | 369.22 | 5 |
| 8  | 1,017.58 | 509.29 | 999.57   | 500.29 | E | 656.38 | 328.70 | 639.36 | 320.18 | 638.37 | 319.69 | 4 |
| 9  | 1,116.65 | 558.83 | 1,098.63 | 549.82 | V | 527.34 | 264.17 | 510.32 | 255.66 |        |        | 3 |
| 10 | 1,253.70 | 627.36 | 1,235.69 | 618.35 | H | 428.27 | 214.64 | 411.25 | 206.13 |        |        | 2 |
| 11 |          |        |          |        | K | 291.21 | 146.11 | 274.19 | 137.60 |        |        | 1 |

Query 97954 Hit 1

MS/MS Fragmentation of **KSDLFQDDLYPDTAGPEAALEAEWVSGR**

Found in **sp|Q9BR76|COR1B\_HUMAN**, Coronin-1B OS=Homo sapiens GN=CORO1B PE=1 SV=1

Match to Query 97954: 3496.686from(875.1787,4+)

Title: 984: Sum of 2 scans in range 2158 (rt=58.0562, f=4, i=655) to 2159 (rt=58.0816, f=4, i=656)

[D:\lab212\membrane\GraceJoyce\iTRAQ\_37\_1.raw]

Data File:Submitted from 20120508-1(merge) by Mascot Daemon on JOYCE-VAIO

Monoisotopic mass of neutral peptide Mr(calc): 3496.686

Variable modifications:

K1 :iTRAQ4plex (K)

Ions Score: 42.02 Expect: 0.053

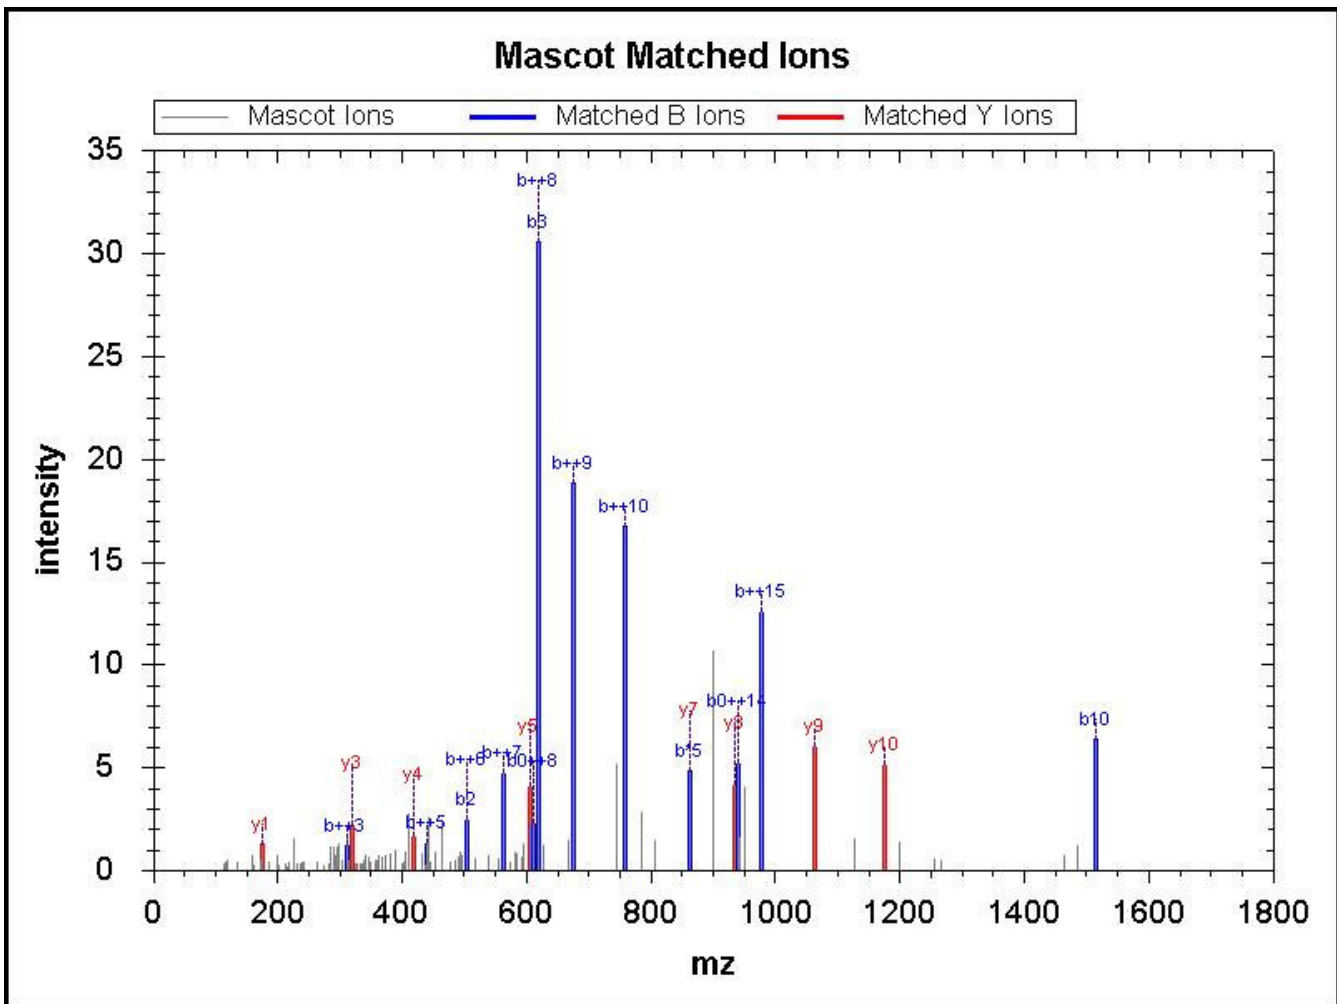

| No | b        | b++    | b*       | b*++   | b0       | b0++   | Seq | y        | y++      | y*       | y*++     | y0       | y0++     | RevNo |
|----|----------|--------|----------|--------|----------|--------|-----|----------|----------|----------|----------|----------|----------|-------|
| 1  | 417.31   | 209.16 | 400.28   | 200.64 |          |        | K   |          |          |          |          |          |          | 29    |
| 2  | 504.34   | 252.67 | 487.31   | 244.16 | 486.33   | 243.67 | S   | 3,081.40 | 1,541.20 | 3,064.37 | 1,532.69 | 3,063.39 | 1,532.20 | 28    |
| 3  | 619.37   | 310.19 | 602.34   | 301.67 | 601.35   | 301.18 | D   | 2,994.36 | 1,497.69 | 2,977.34 | 1,489.17 | 2,976.35 | 1,488.68 | 27    |
| 4  | 732.45   | 366.73 | 715.42   | 358.22 | 714.44   | 357.72 | L   | 2,879.34 | 1,440.17 | 2,862.31 | 1,431.66 | 2,861.33 | 1,431.17 | 26    |
| 5  | 879.52   | 440.26 | 862.49   | 431.75 | 861.51   | 431.26 | F   | 2,766.25 | 1,383.63 | 2,749.23 | 1,375.12 | 2,748.24 | 1,374.62 | 25    |
| 6  | 1,007.58 | 504.29 | 990.55   | 495.78 | 989.57   | 495.29 | Q   | 2,619.18 | 1,310.10 | 2,602.16 | 1,301.58 | 2,601.17 | 1,301.09 | 24    |
| 7  | 1,122.60 | 561.81 | 1,105.58 | 553.29 | 1,104.59 | 552.80 | D   | 2,491.13 | 1,246.07 | 2,474.10 | 1,237.55 | 2,473.12 | 1,237.06 | 23    |

|    |          |          |          |          |          |          |   |          |          |          |          |          |          |    |
|----|----------|----------|----------|----------|----------|----------|---|----------|----------|----------|----------|----------|----------|----|
| 8  | 1,237.63 | 619.32   | 1,220.60 | 610.81   | 1,219.62 | 610.31   | D | 2,376.10 | 1,188.55 | 2,359.07 | 1,180.04 | 2,358.09 | 1,179.55 | 22 |
| 9  | 1,350.71 | 675.86   | 1,333.69 | 667.35   | 1,332.70 | 666.86   | L | 2,261.07 | 1,131.04 | 2,244.05 | 1,122.53 | 2,243.06 | 1,122.03 | 21 |
| 10 | 1,513.78 | 757.39   | 1,496.75 | 748.88   | 1,495.77 | 748.39   | Y | 2,147.99 | 1,074.50 | 2,130.96 | 1,065.98 | 2,129.98 | 1,065.49 | 20 |
| 11 | 1,610.83 | 805.92   | 1,593.80 | 797.41   | 1,592.82 | 796.91   | P | 1,984.92 | 992.97   | 1,967.90 | 984.45   | 1,966.91 | 983.96   | 19 |
| 12 | 1,725.86 | 863.43   | 1,708.83 | 854.92   | 1,707.85 | 854.43   | D | 1,887.87 | 944.44   | 1,870.85 | 935.93   | 1,869.86 | 935.43   | 18 |
| 13 | 1,826.91 | 913.96   | 1,809.88 | 905.44   | 1,808.89 | 904.95   | T | 1,772.85 | 886.93   | 1,755.82 | 878.41   | 1,754.83 | 877.92   | 17 |
| 14 | 1,897.94 | 949.47   | 1,880.92 | 940.96   | 1,879.93 | 940.47   | A | 1,671.80 | 836.40   | 1,654.77 | 827.89   | 1,653.79 | 827.40   | 16 |
| 15 | 1,954.96 | 977.99   | 1,937.94 | 969.47   | 1,936.95 | 968.98   | G | 1,600.76 | 800.88   | 1,583.73 | 792.37   | 1,582.75 | 791.88   | 15 |
| 16 | 2,052.02 | 1,026.51 | 2,034.99 | 1,018.00 | 2,034.01 | 1,017.51 | P | 1,543.74 | 772.37   | 1,526.71 | 763.86   | 1,525.73 | 763.37   | 14 |
| 17 | 2,181.06 | 1,091.03 | 2,164.03 | 1,082.52 | 2,163.05 | 1,082.03 | E | 1,446.69 | 723.85   | 1,429.66 | 715.33   | 1,428.68 | 714.84   | 13 |
| 18 | 2,252.10 | 1,126.55 | 2,235.07 | 1,118.04 | 2,234.09 | 1,117.55 | A | 1,317.64 | 659.33   | 1,300.62 | 650.81   | 1,299.63 | 650.32   | 12 |
| 19 | 2,323.13 | 1,162.07 | 2,306.11 | 1,153.56 | 2,305.12 | 1,153.07 | A | 1,246.61 | 623.81   | 1,229.58 | 615.29   | 1,228.60 | 614.80   | 11 |
| 20 | 2,436.22 | 1,218.61 | 2,419.19 | 1,210.10 | 2,418.21 | 1,209.61 | L | 1,175.57 | 588.29   | 1,158.54 | 579.78   | 1,157.56 | 579.28   | 10 |
| 21 | 2,565.26 | 1,283.13 | 2,548.23 | 1,274.62 | 2,547.25 | 1,274.13 | E | 1,062.49 | 531.75   | 1,045.46 | 523.23   | 1,044.47 | 522.74   | 9  |
| 22 | 2,636.30 | 1,318.65 | 2,619.27 | 1,310.14 | 2,618.29 | 1,309.65 | A | 933.44   | 467.22   | 916.42   | 458.71   | 915.43   | 458.22   | 8  |
| 23 | 2,765.34 | 1,383.17 | 2,748.31 | 1,374.66 | 2,747.33 | 1,374.17 | E | 862.41   | 431.71   | 845.38   | 423.19   | 844.39   | 422.70   | 7  |
| 24 | 2,894.38 | 1,447.69 | 2,877.36 | 1,439.18 | 2,876.37 | 1,438.69 | E | 733.36   | 367.19   | 716.34   | 358.67   | 715.35   | 358.18   | 6  |
| 25 | 3,080.46 | 1,540.73 | 3,063.43 | 1,532.22 | 3,062.45 | 1,531.73 | W | 604.32   | 302.66   | 587.29   | 294.15   | 586.31   | 293.66   | 5  |
| 26 | 3,179.53 | 1,590.27 | 3,162.50 | 1,581.76 | 3,161.52 | 1,581.26 | V | 418.24   | 209.62   | 401.21   | 201.11   | 400.23   | 200.62   | 4  |
| 27 | 3,266.56 | 1,633.78 | 3,249.53 | 1,625.27 | 3,248.55 | 1,624.78 | S | 319.17   | 160.09   | 302.15   | 151.58   | 301.16   | 151.08   | 3  |
| 28 | 3,323.58 | 1,662.30 | 3,306.56 | 1,653.78 | 3,305.57 | 1,653.29 | G | 232.14   | 116.57   | 215.11   | 108.06   |          |          | 2  |
| 29 |          |          |          |          |          |          | R | 175.12   | 88.06    | 158.09   | 79.55    |          |          | 1  |

Query 47797 Hit 1

MS/MS Fragmentation of **ALTLDQWLEQHK**

Found in **sp|Q9HBL8|NMRL1\_HUMAN**, NmrA-like family domain-containing protein 1 OS=Homo sapiens GN=NMRL1 PE=1 SV=1

Match to Query 47797: 1768.974from(590.6654,3+)

Title: 752: Scan 1653 (rt=47.009, f=2, i=265) [D:\lab212\membrane\Grace\Joyce\iTRAQ\_42\_2.raw]

Data File: Submitted from 20120508-1(merge) by Mascot Daemon on JOYCE-VAIO

Monoisotopic mass of neutral peptide Mr(calc): 1768.974

Variable modifications:

K12 iTRAQ4plex (K)

Ions Score: 42 Expect: 0.047





### Mascot Matched Ions

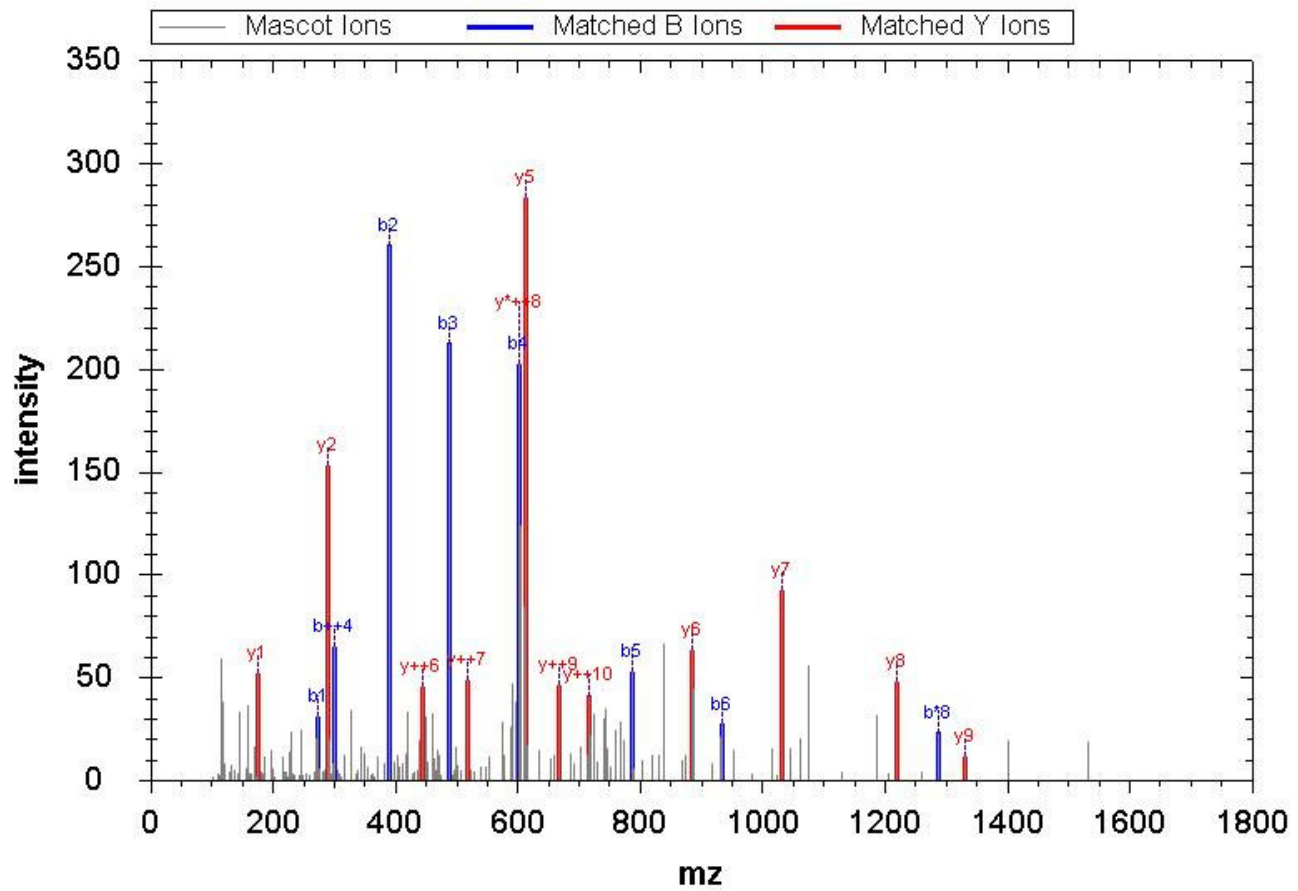

| No | b        | b++    | b*       | b*++   | b0       | b0++   | Seq | y        | y++    | y*       | y*++   | y0       | y0++   | RevNo |
|----|----------|--------|----------|--------|----------|--------|-----|----------|--------|----------|--------|----------|--------|-------|
| 1  | 274.15   | 137.58 |          |        | 256.14   | 128.57 | E   |          |        |          |        |          |        | 12    |
| 2  | 389.18   | 195.09 |          |        | 371.17   | 186.09 | D   | 1,545.89 | 773.45 | 1,528.86 | 764.94 | 1,527.88 | 764.44 | 11    |
| 3  | 488.25   | 244.63 |          |        | 470.24   | 235.62 | V   | 1,430.86 | 715.94 | 1,413.84 | 707.42 | 1,412.85 | 706.93 | 10    |
| 4  | 601.33   | 301.17 |          |        | 583.32   | 292.16 | L   | 1,331.80 | 666.40 | 1,314.77 | 657.89 | 1,313.79 | 657.40 | 9     |
| 5  | 787.41   | 394.21 |          |        | 769.40   | 385.20 | W   | 1,218.71 | 609.86 | 1,201.69 | 601.35 | 1,200.70 | 600.85 | 8     |
| 6  | 934.48   | 467.74 |          |        | 916.47   | 458.74 | F   | 1,032.63 | 516.82 | 1,015.61 | 508.31 | 1,014.62 | 507.81 | 7     |
| 7  | 1,206.68 | 603.84 | 1,189.65 | 595.33 | 1,188.67 | 594.84 | K   | 885.56   | 443.29 | 868.54   | 434.77 | 867.55   | 434.28 | 6     |
| 8  | 1,303.73 | 652.37 | 1,286.70 | 643.85 | 1,285.72 | 643.36 | P   | 613.37   | 307.19 | 596.34   | 298.67 | 595.36   | 298.18 | 5     |
| 9  | 1,402.80 | 701.90 | 1,385.77 | 693.39 | 1,384.79 | 692.90 | V   | 516.31   | 258.66 | 499.29   | 250.15 | 498.30   | 249.66 | 4     |
| 10 | 1,531.84 | 766.42 | 1,514.81 | 757.91 | 1,513.83 | 757.42 | E   | 417.25   | 209.13 | 400.22   | 200.61 | 399.24   | 200.12 | 3     |
| 11 | 1,644.92 | 822.97 | 1,627.90 | 814.45 | 1,626.91 | 813.96 | L   | 288.20   | 144.61 | 271.18   | 136.09 |          |        | 2     |
| 12 |          |        |          |        |          |        | R   | 175.12   | 88.06  | 158.09   | 79.55  |          |        | 1     |

Query 71998 Hit 1

MS/MS Fragmentation of **GTLSAELTAAHFGGGGGLLHK**

Found in **sp|P78316|NOP14\_HUMAN**, Nucleolar protein 14 OS=Homo sapiens GN=NOP14 PE=1 SV=3

Match to Query 71998: 2281.247from(571.3191,4+)

Title: 651: Scan 1455 (rt=42.4214, f=3, i=224) [D:\lab212\membrane\Grace\Joyce\iTRAQ\_54\_2.raw]

Data File: Submitted from 20120508-1(merge) by Mascot Daemon on JOYCE-VAIO

Monoisotopic mass of neutral peptide Mr(calc): 2281.247

Variable modifications:

K21 iTRAQ4plex (K)

Ions Score: 41.86 Expect: 0.045

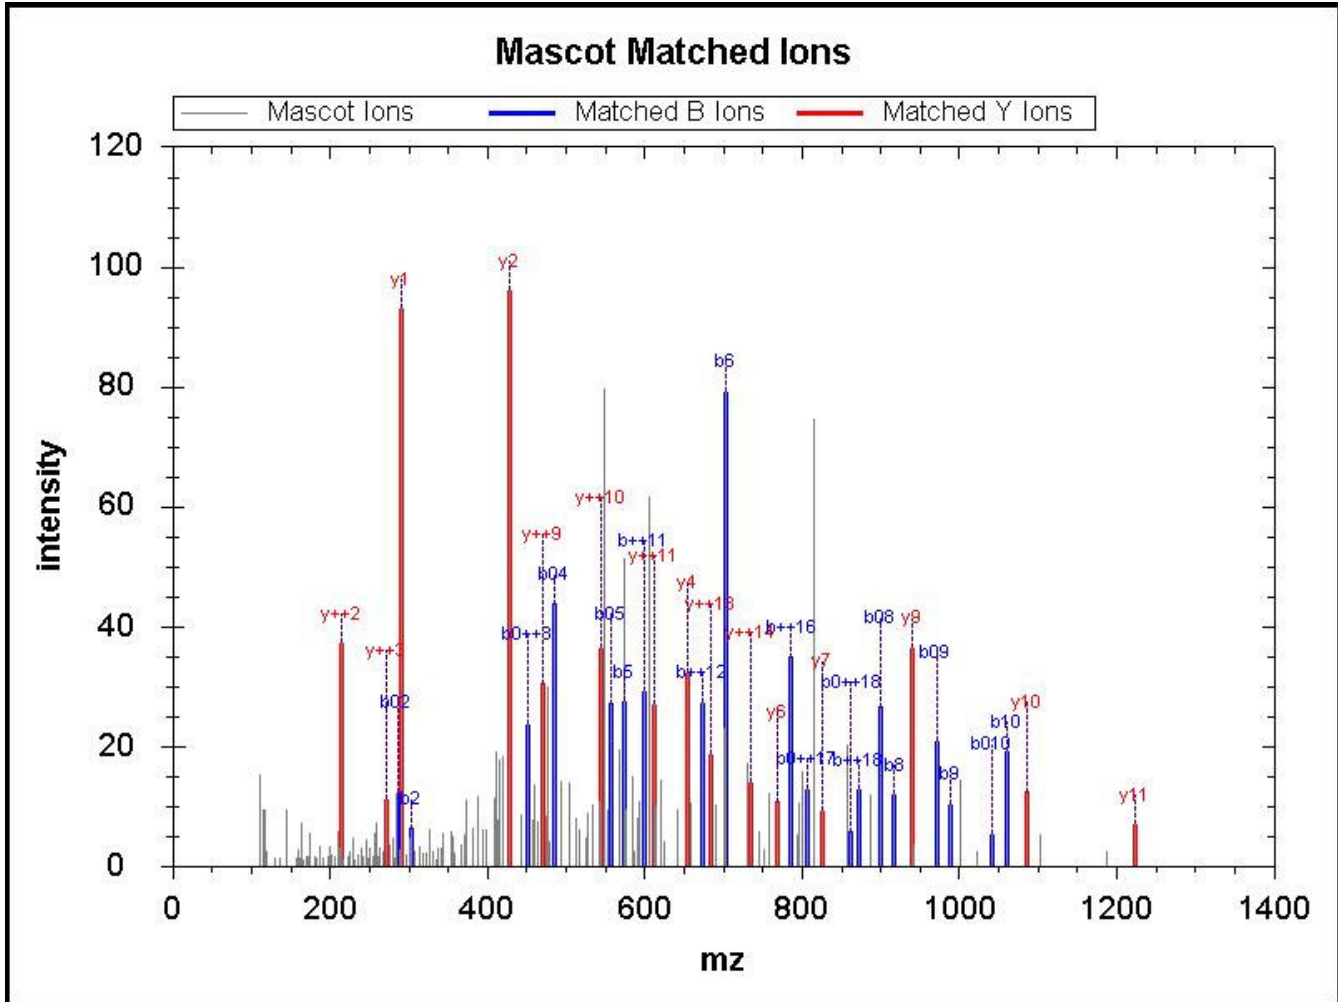

| No | b        | b++    | b0       | b0++   | Seq | y        | y++      | y*       | y*++     | y0       | y0++     | RevNo |
|----|----------|--------|----------|--------|-----|----------|----------|----------|----------|----------|----------|-------|
| 1  | 202.13   | 101.57 |          |        | G   |          |          |          |          |          |          | 21    |
| 2  | 303.18   | 152.09 | 285.17   | 143.09 | T   | 2,081.13 | 1,041.07 | 2,064.10 | 1,032.55 | 2,063.12 | 1,032.06 | 20    |
| 3  | 416.26   | 208.63 | 398.25   | 199.63 | L   | 1,980.08 | 990.54   | 1,963.05 | 982.03   | 1,962.07 | 981.54   | 19    |
| 4  | 503.29   | 252.15 | 485.28   | 243.15 | S   | 1,866.99 | 934.00   | 1,849.97 | 925.49   | 1,848.98 | 925.00   | 18    |
| 5  | 574.33   | 287.67 | 556.32   | 278.66 | A   | 1,779.96 | 890.48   | 1,762.94 | 881.97   | 1,761.95 | 881.48   | 17    |
| 6  | 703.37   | 352.19 | 685.36   | 343.19 | E   | 1,708.93 | 854.97   | 1,691.90 | 846.45   | 1,690.91 | 845.96   | 16    |
| 7  | 816.46   | 408.73 | 798.45   | 399.73 | L   | 1,579.88 | 790.45   | 1,562.86 | 781.93   | 1,561.87 | 781.44   | 15    |
| 8  | 917.51   | 459.26 | 899.50   | 450.25 | T   | 1,466.80 | 733.90   | 1,449.77 | 725.39   | 1,448.79 | 724.90   | 14    |
| 9  | 988.54   | 494.78 | 970.53   | 485.77 | A   | 1,365.75 | 683.38   | 1,348.72 | 674.87   |          |          | 13    |
| 10 | 1,059.58 | 530.29 | 1,041.57 | 521.29 | A   | 1,294.71 | 647.86   | 1,277.69 | 639.35   |          |          | 12    |
| 11 | 1,196.64 | 598.82 | 1,178.63 | 589.82 | H   | 1,223.68 | 612.34   | 1,206.65 | 603.83   |          |          | 11    |
| 12 | 1,343.71 | 672.36 | 1,325.70 | 663.35 | F   | 1,086.62 | 543.81   | 1,069.59 | 535.30   |          |          | 10    |
| 13 | 1,400.73 | 700.87 | 1,382.72 | 691.86 | G   | 939.55   | 470.28   | 922.52   | 461.76   |          |          | 9     |
| 14 | 1,457.75 | 729.38 | 1,439.74 | 720.37 | G   | 882.53   | 441.77   | 865.50   | 433.25   |          |          | 8     |

|    |          |        |          |        |   |        |        |        |        |  |  |  |   |
|----|----------|--------|----------|--------|---|--------|--------|--------|--------|--|--|--|---|
| 15 | 1,514.77 | 757.89 | 1,496.76 | 748.88 | G | 825.51 | 413.26 | 808.48 | 404.74 |  |  |  | 7 |
| 16 | 1,571.79 | 786.40 | 1,553.78 | 777.40 | G | 768.48 | 384.75 | 751.46 | 376.23 |  |  |  | 6 |
| 17 | 1,628.82 | 814.91 | 1,610.80 | 805.91 | G | 711.46 | 356.24 | 694.44 | 347.72 |  |  |  | 5 |
| 18 | 1,741.90 | 871.45 | 1,723.89 | 862.45 | L | 654.44 | 327.72 | 637.42 | 319.21 |  |  |  | 4 |
| 19 | 1,854.98 | 928.00 | 1,836.97 | 918.99 | L | 541.36 | 271.18 | 524.33 | 262.67 |  |  |  | 3 |
| 20 | 1,992.04 | 996.52 | 1,974.03 | 987.52 | H | 428.27 | 214.64 | 411.25 | 206.13 |  |  |  | 2 |
| 21 |          |        |          |        | K | 291.21 | 146.11 | 274.19 | 137.60 |  |  |  | 1 |

Query 31317 Hit 1

MS/MS Fragmentation of **GGFDWNLVFK**

Found in **sp|Q10471|GALT2\_HUMAN**, Polypeptide N-acetylgalactosaminyltransferase 2 OS=Homo sapiens GN=GALNT2 PE=1 SV=1

Match to Query 31317: 1469.791from(735.9025,2+)

Title: 926: Sum of 2 scans in range 2061 (rt=55.8003, f=4, i=615) to 2062 (rt=55.8257, f=4, i=616)

[D:\lab212\membrane\Grace\Joyce\iTRAQ\_31\_1.raw]

Data File: Submitted from 20120508-1(merge) by Mascot Daemon on JOYCE-VAIO

Monoisotopic mass of neutral peptide Mr(calc): 1469.791

Variable modifications:

K10 iTRAQ4plex (K)

Ions Score: 41.8 Expect: 0.049

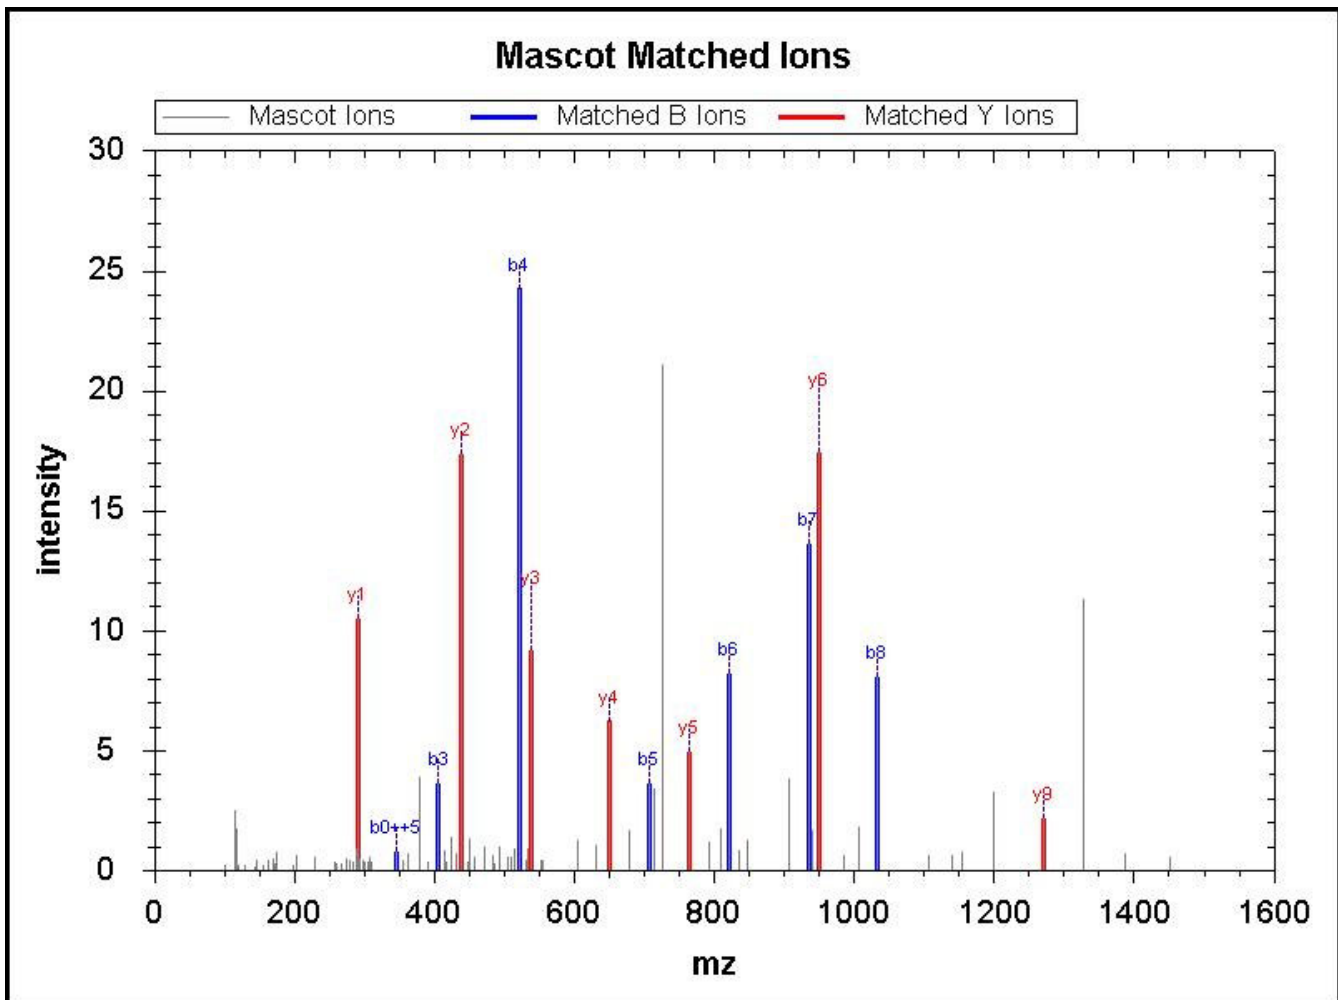

| No | b      | b++    | b*     | b*++   | b0     | b0++   | Seq | y        | y++    | y*       | y*++   | y0       | y0++   | RevNo |
|----|--------|--------|--------|--------|--------|--------|-----|----------|--------|----------|--------|----------|--------|-------|
| 1  | 202.13 | 101.57 |        |        |        |        | G   |          |        |          |        |          |        | 10    |
| 2  | 259.15 | 130.08 |        |        |        |        | G   | 1,269.67 | 635.34 | 1,252.65 | 626.83 | 1,251.66 | 626.34 | 9     |
| 3  | 406.22 | 203.61 |        |        |        |        | F   | 1,212.65 | 606.83 | 1,195.63 | 598.32 | 1,194.64 | 597.83 | 8     |
| 4  | 521.25 | 261.13 |        |        | 503.24 | 252.12 | D   | 1,065.58 | 533.30 | 1,048.56 | 524.78 | 1,047.57 | 524.29 | 7     |
| 5  | 707.33 | 354.17 |        |        | 689.32 | 345.16 | W   | 950.56   | 475.78 | 933.53   | 467.27 |          |        | 6     |
| 6  | 821.37 | 411.19 | 804.34 | 402.68 | 803.36 | 402.18 | N   | 764.48   | 382.74 | 747.45   | 374.23 |          |        | 5     |

|    |          |        |          |        |          |        |   |        |        |        |        |  |  |   |
|----|----------|--------|----------|--------|----------|--------|---|--------|--------|--------|--------|--|--|---|
| 7  | 934.45   | 467.73 | 917.43   | 459.22 | 916.44   | 458.73 | L | 650.44 | 325.72 | 633.41 | 317.21 |  |  | 4 |
| 8  | 1,033.52 | 517.26 | 1,016.50 | 508.75 | 1,015.51 | 508.26 | V | 537.35 | 269.18 | 520.33 | 260.67 |  |  | 3 |
| 9  | 1,180.59 | 590.80 | 1,163.56 | 582.29 | 1,162.58 | 581.79 | F | 438.28 | 219.65 | 421.26 | 211.13 |  |  | 2 |
| 10 |          |        |          |        |          |        | K | 291.21 | 146.11 | 274.19 | 137.60 |  |  | 1 |

Query 52132 Hit 1

MS/MS Fragmentation of **LYKDDQLDDGK**

Found in [sp|Q15370|ELOB\\_HUMAN](#), Transcription elongation factor B polypeptide 2 OS=Homo sapiens GN=TCEB2 PE=1 SV=1

Match to Query 52132: 1854.017from(619.013,3+)

Title: 182: Sum of 2 scans in range 1046 (rt=31.0314, f=4, i=83) to 1047 (rt=31.0569, f=4, i=84)

[D:\lab212\membrane\Grace\Joyce\iTRAQ\_46\_1.raw]

Data File: Submitted from 20120508-1(merge) by Mascot Daemon on JOYCE-VAIO

Monoisotopic mass of neutral peptide Mr(calc): 1854.017

Variable modifications:

K3 iTRAQ4plex (K)

K12 iTRAQ4plex (K)

Ions Score: 41.77 Expect: 0.049

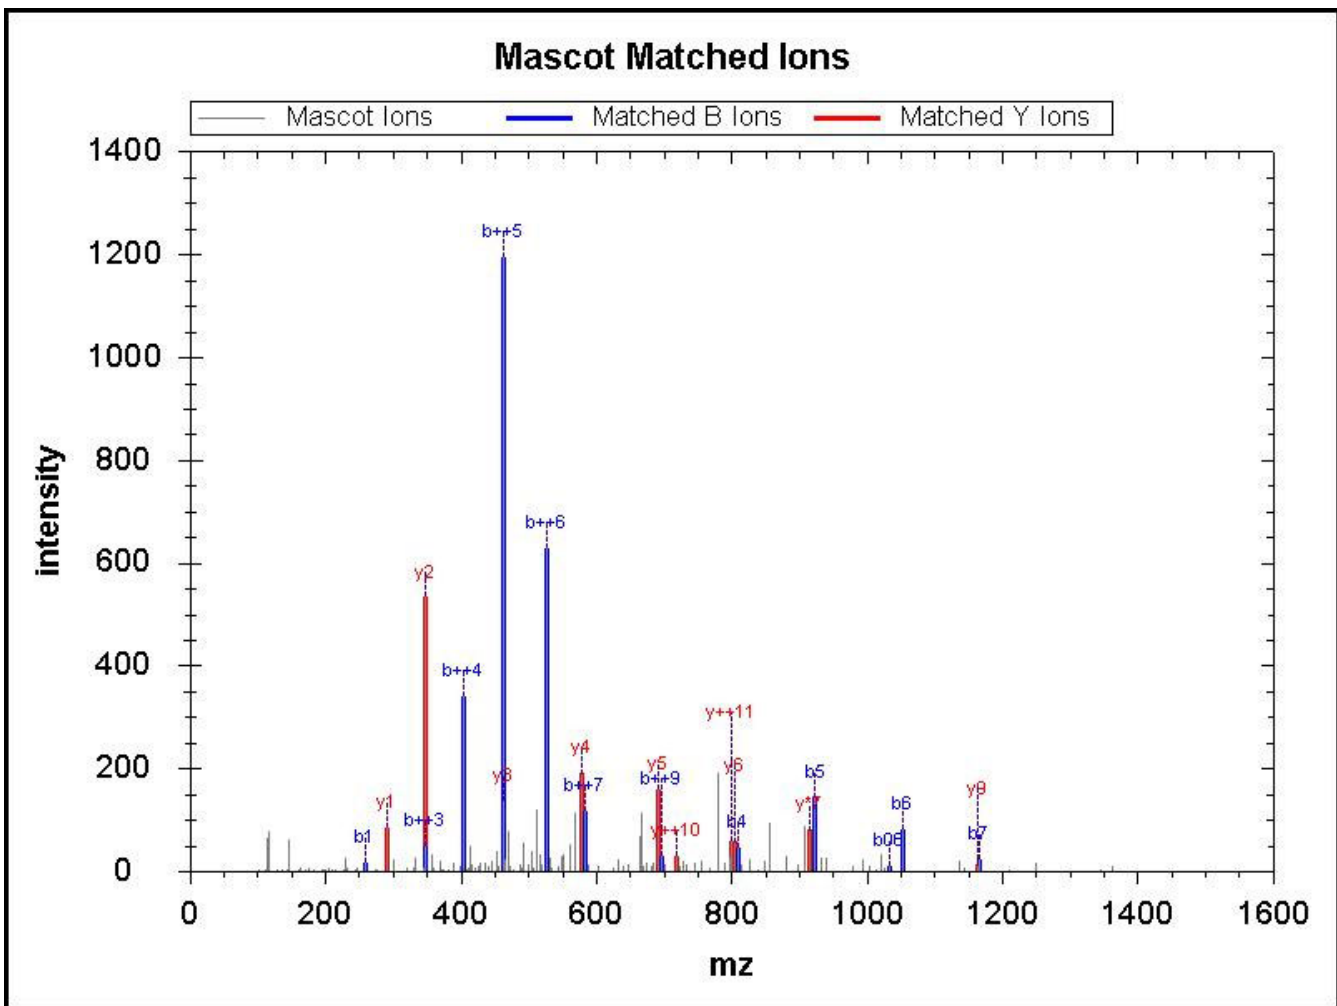

| No | b        | b++    | b*       | b*++   | b0       | b0++   | Seq | y        | y++    | y*       | y*++   | y0       | y0++   | RevNo |
|----|----------|--------|----------|--------|----------|--------|-----|----------|--------|----------|--------|----------|--------|-------|
| 1  | 258.19   | 129.60 |          |        |          |        | L   |          |        |          |        |          |        | 12    |
| 2  | 421.26   | 211.13 |          |        |          |        | Y   | 1,597.83 | 799.42 | 1,580.80 | 790.91 | 1,579.82 | 790.41 | 11    |
| 3  | 693.45   | 347.23 | 676.43   | 338.72 |          |        | K   | 1,434.77 | 717.89 | 1,417.74 | 709.37 | 1,416.76 | 708.88 | 10    |
| 4  | 808.48   | 404.74 | 791.45   | 396.23 | 790.47   | 395.74 | D   | 1,162.57 | 581.79 | 1,145.54 | 573.28 | 1,144.56 | 572.78 | 9     |
| 5  | 923.51   | 462.26 | 906.48   | 453.74 | 905.50   | 453.25 | D   | 1,047.54 | 524.28 | 1,030.52 | 515.76 | 1,029.53 | 515.27 | 8     |
| 6  | 1,051.57 | 526.29 | 1,034.54 | 517.77 | 1,033.56 | 517.28 | Q   | 932.52   | 466.76 | 915.49   | 458.25 | 914.51   | 457.76 | 7     |
| 7  | 1,164.65 | 582.83 | 1,147.62 | 574.32 | 1,146.64 | 573.82 | L   | 804.46   | 402.73 | 787.43   | 394.22 | 786.45   | 393.73 | 6     |
| 8  | 1,277.73 | 639.37 | 1,260.71 | 630.86 | 1,259.72 | 630.37 | L   | 691.37   | 346.19 | 674.35   | 337.68 | 673.36   | 337.19 | 5     |

|    |          |        |          |        |          |        |   |        |        |        |        |        |        |   |
|----|----------|--------|----------|--------|----------|--------|---|--------|--------|--------|--------|--------|--------|---|
| 9  | 1,392.76 | 696.88 | 1,375.73 | 688.37 | 1,374.75 | 687.88 | D | 578.29 | 289.65 | 561.26 | 281.14 | 560.28 | 280.64 | 4 |
| 10 | 1,507.79 | 754.40 | 1,490.76 | 745.88 | 1,489.78 | 745.39 | D | 463.26 | 232.14 | 446.24 | 223.62 | 445.25 | 223.13 | 3 |
| 11 | 1,564.81 | 782.91 | 1,547.78 | 774.40 | 1,546.80 | 773.90 | G | 348.24 | 174.62 | 331.21 | 166.11 |        |        | 2 |
| 12 |          |        |          |        |          |        | K | 291.21 | 146.11 | 274.19 | 137.60 |        |        | 1 |

Query 21104 Hit 1

MS/MS Fragmentation of **EKKEQLSK**

Found in **sp|Q9CPR1|RWDD4\_MOUSE**, RWD domain-containing protein 4 OS=Mus musculus GN=Rwdd4 PE=2 SV=1

Match to Query 21104: 1277.797 from (426.9396,3+)

Title: 234: Scan 572 (rt=22.5785, f=2, i=92) [D:\lab212\membrane\Grace\Joyce\iTRAQ\_49\_1.raw]

Data File: Submitted from 20120508-1(merge) by Mascot Daemon on JOYCE-VAIO

Monoisotopic mass of neutral peptide Mr(calc): 1277.797

Variable modifications:

Q5 :Deamidated (NQ)

K8 :iTRAQ4plex (K)

Ions Score: 41.77 Expect: 0.030

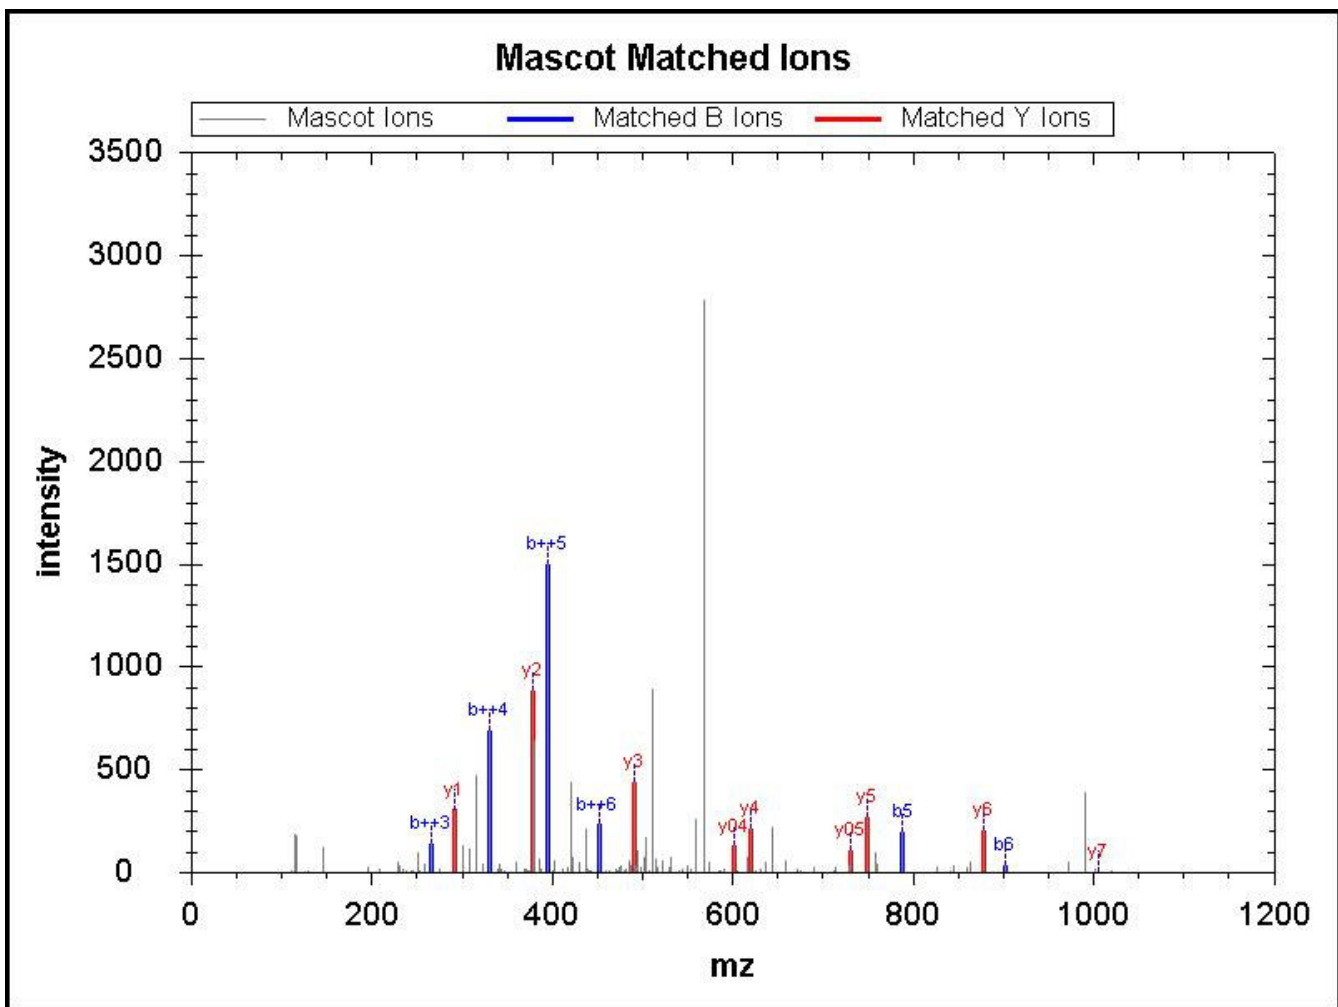

| No | b      | b++    | b*     | b*++   | b0     | b0++   | Seq | y        | y++    | y*     | y*++   | y0     | y0++   | RevNo |
|----|--------|--------|--------|--------|--------|--------|-----|----------|--------|--------|--------|--------|--------|-------|
| 1  | 274.15 | 137.58 |        |        | 256.14 | 128.57 | E   |          |        |        |        |        |        | 8     |
| 2  | 402.25 | 201.63 | 385.22 | 193.11 | 384.24 | 192.62 | K   | 1,005.61 | 503.31 | 988.58 | 494.79 | 987.60 | 494.30 | 7     |
| 3  | 530.34 | 265.67 | 513.32 | 257.16 | 512.33 | 256.67 | K   | 877.51   | 439.26 | 860.48 | 430.75 | 859.50 | 430.25 | 6     |
| 4  | 659.38 | 330.20 | 642.36 | 321.68 | 641.37 | 321.19 | E   | 749.42   | 375.21 | 732.39 | 366.70 | 731.41 | 366.21 | 5     |
| 5  | 788.43 | 394.72 | 771.40 | 386.20 | 770.42 | 385.71 | Q   | 620.37   | 310.69 | 603.35 | 302.18 | 602.36 | 301.69 | 4     |
| 6  | 901.51 | 451.26 | 884.48 | 442.75 | 883.50 | 442.25 | L   | 491.33   | 246.17 | 474.30 | 237.66 | 473.32 | 237.16 | 3     |
| 7  | 988.54 | 494.78 | 971.52 | 486.26 | 970.53 | 485.77 | S   | 378.25   | 189.63 | 361.22 | 181.11 | 360.24 | 180.62 | 2     |
| 8  |        |        |        |        |        |        | K   | 291.21   | 146.11 | 274.19 | 137.60 |        |        | 1     |

Query 65777 Hit 1

MS/MS Fragmentation of **MKQELEAEYLAVFK**

Found in **sp|Q9Y5X3|SNX5\_HUMAN**, Sorting nexin-5 OS=Homo sapiens GN=SNX5 PE=1 SV=1

Match to Query 65777: 2130.177from(711.0665,3+)

Title: 898: Scan 1947 (rt=53.551, f=2, i=309) [D:\lab212\membrane\Grace\Joyce\iTRAQ\_45\_1.raw]

Data File: Submitted from 20120508-1(merge) by Mascot Daemon on JOYCE-VAIO

Monoisotopic mass of neutral peptide Mr(calc): 2130.177

Variable modifications:

K2 :iTRAQ4plex (K)

K14 :iTRAQ4plex (K)

Ions Score: 41.77 Expect: 0.044

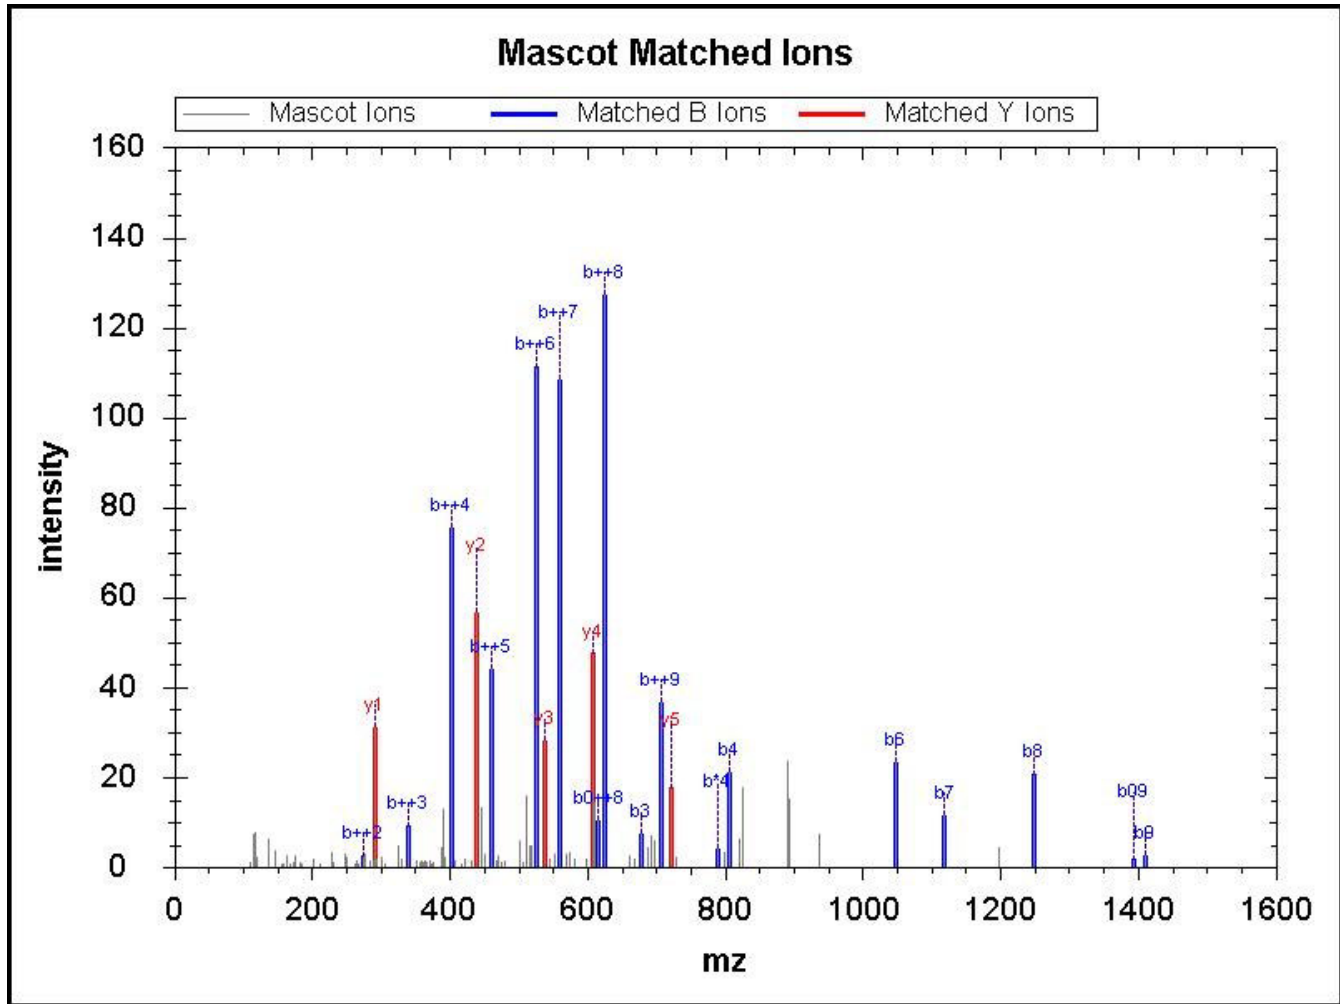

| No | b               | b++           | b*            | b*++   | b0              | b0++          | Seq | y             | y++    | y*       | y*++   | y0       | y0++   | RevNo |
|----|-----------------|---------------|---------------|--------|-----------------|---------------|-----|---------------|--------|----------|--------|----------|--------|-------|
| 1  | 276.15          | 138.58        |               |        |                 |               | M   |               |        |          |        |          |        | 14    |
| 2  | 548.35          | <b>274.68</b> | 531.32        | 266.16 |                 |               | K   | 1,856.04      | 928.52 | 1,839.01 | 920.01 | 1,838.03 | 919.52 | 13    |
| 3  | <b>676.41</b>   | <b>338.71</b> | 659.38        | 330.19 |                 |               | Q   | 1,583.84      | 792.43 | 1,566.82 | 783.91 | 1,565.83 | 783.42 | 12    |
| 4  | <b>805.45</b>   | <b>403.23</b> | <b>788.42</b> | 394.71 | 787.44          | 394.22        | E   | 1,455.79      | 728.40 | 1,438.76 | 719.88 | 1,437.77 | 719.39 | 11    |
| 5  | 918.53          | <b>459.77</b> | 901.51        | 451.26 | 900.52          | 450.76        | L   | 1,326.74      | 663.87 | 1,309.72 | 655.36 | 1,308.73 | 654.87 | 10    |
| 6  | <b>1,047.57</b> | <b>524.29</b> | 1,030.55      | 515.78 | 1,029.56        | 515.29        | E   | 1,213.66      | 607.33 | 1,196.63 | 598.82 | 1,195.65 | 598.33 | 9     |
| 7  | <b>1,118.61</b> | <b>559.81</b> | 1,101.59      | 551.30 | 1,100.60        | 550.80        | A   | 1,084.62      | 542.81 | 1,067.59 | 534.30 | 1,066.61 | 533.81 | 8     |
| 8  | <b>1,247.65</b> | <b>624.33</b> | 1,230.63      | 615.82 | 1,229.64        | <b>615.33</b> | E   | 1,013.58      | 507.29 | 996.55   | 498.78 | 995.57   | 498.29 | 7     |
| 9  | <b>1,410.72</b> | <b>705.86</b> | 1,393.69      | 697.35 | <b>1,392.71</b> | 696.86        | Y   | 884.54        | 442.77 | 867.51   | 434.26 |          |        | 6     |
| 10 | 1,523.80        | 762.40        | 1,506.78      | 753.89 | 1,505.79        | 753.40        | L   | <b>721.47</b> | 361.24 | 704.45   | 352.73 |          |        | 5     |
| 11 | 1,594.84        | 797.92        | 1,577.81      | 789.41 | 1,576.83        | 788.92        | A   | <b>608.39</b> | 304.70 | 591.36   | 296.18 |          |        | 4     |
| 12 | 1,693.91        | 847.46        | 1,676.88      | 838.94 | 1,675.90        | 838.45        | V   | <b>537.35</b> | 269.18 | 520.33   | 260.67 |          |        | 3     |
| 13 | 1,840.98        | 920.99        | 1,823.95      | 912.48 | 1,822.97        | 911.99        | F   | <b>438.28</b> | 219.65 | 421.26   | 211.13 |          |        | 2     |
| 14 |                 |               |               |        |                 |               | K   | <b>291.21</b> | 146.11 | 274.19   | 137.60 |          |        | 1     |

Query 74470 Hit 1

MS/MS Fragmentation of **YYELLIVNPIWLVPTK**

Found in **sp|Q99LI2|CLCC1\_MOUSE**, Chloride channel CLIC-like protein 1 OS=Mus musculus GN=Clcc1 PE=1 SV=1

Match to Query 74470: 2345.355from(782.7922,3+)

Title: 1257: Sum of 2 scans in range 2828 (rt=72.7696, f=4, i=827) to 2829 (rt=72.795, f=4, i=828)

[D:\lab212\membrane\Grace\Joyce\iTRAQ\_23\_1.raw]

Data File:Submitted from 20120508-1(merge) by Mascot Daemon on JOYCE-VAIO

Monoisotopic mass of neutral peptide Mr(calc): 2345.355

Variable modifications:

K17 :iTRAQ4plex (K)

Ions Score: 41.76 Expect: 0.022

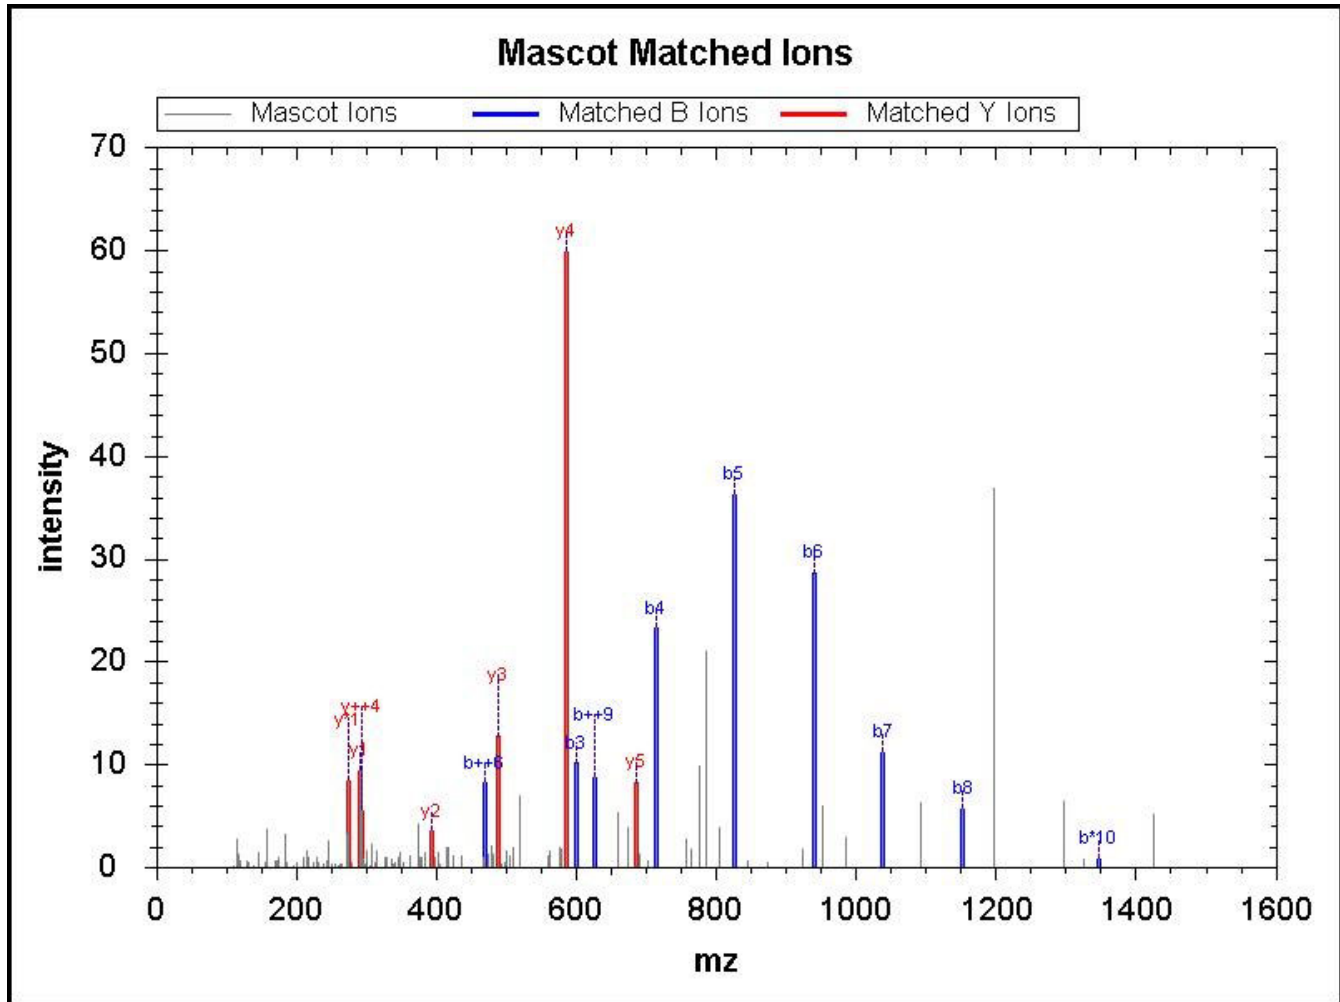

| No | b               | b++           | b*              | b***   | b0       | b0++   | Seq | y             | y++           | y*       | y***     | y0       | y0++     | RevNo |
|----|-----------------|---------------|-----------------|--------|----------|--------|-----|---------------|---------------|----------|----------|----------|----------|-------|
| 1  | 308.17          | 154.59        |                 |        |          |        | Y   |               |               |          |          |          |          | 17    |
| 2  | 471.24          | 236.12        |                 |        |          |        | Y   | 2,039.21      | 1,020.11      | 2,022.18 | 1,011.59 | 2,021.20 | 1,011.10 | 16    |
| 3  | <b>600.28</b>   | 300.64        |                 |        | 582.27   | 291.64 | E   | 1,876.14      | 938.58        | 1,859.12 | 930.06   | 1,858.13 | 929.57   | 15    |
| 4  | <b>713.36</b>   | 357.18        |                 |        | 695.35   | 348.18 | L   | 1,747.10      | 874.05        | 1,730.07 | 865.54   | 1,729.09 | 865.05   | 14    |
| 5  | <b>826.45</b>   | 413.73        |                 |        | 808.44   | 404.72 | L   | 1,634.02      | 817.51        | 1,616.99 | 809.00   | 1,616.01 | 808.51   | 13    |
| 6  | <b>939.53</b>   | <b>470.27</b> |                 |        | 921.52   | 461.26 | I   | 1,520.93      | 760.97        | 1,503.91 | 752.46   | 1,502.92 | 751.96   | 12    |
| 7  | <b>1,038.60</b> | 519.80        |                 |        | 1,020.59 | 510.80 | V   | 1,407.85      | 704.43        | 1,390.82 | 695.91   | 1,389.84 | 695.42   | 11    |
| 8  | <b>1,152.64</b> | 576.82        | 1,135.62        | 568.31 | 1,134.63 | 567.82 | N   | 1,308.78      | 654.89        | 1,291.75 | 646.38   | 1,290.77 | 645.89   | 10    |
| 9  | 1,249.69        | <b>625.35</b> | 1,232.67        | 616.84 | 1,231.68 | 616.35 | P   | 1,194.74      | 597.87        | 1,177.71 | 589.36   | 1,176.73 | 588.87   | 9     |
| 10 | 1,362.78        | 681.89        | <b>1,345.75</b> | 673.38 | 1,344.77 | 672.89 | I   | 1,097.68      | 549.35        | 1,080.66 | 540.83   | 1,079.67 | 540.34   | 8     |
| 11 | 1,548.86        | 774.93        | 1,531.83        | 766.42 | 1,530.85 | 765.93 | W   | 984.60        | 492.80        | 967.57   | 484.29   | 966.59   | 483.80   | 7     |
| 12 | 1,661.94        | 831.47        | 1,644.92        | 822.96 | 1,643.93 | 822.47 | L   | 798.52        | 399.76        | 781.49   | 391.25   | 780.51   | 390.76   | 6     |
| 13 | 1,761.01        | 881.01        | 1,743.98        | 872.50 | 1,743.00 | 872.00 | V   | <b>685.44</b> | 343.22        | 668.41   | 334.71   | 667.43   | 334.22   | 5     |
| 14 | 1,858.06        | 929.54        | 1,841.04        | 921.02 | 1,840.05 | 920.53 | P   | <b>586.37</b> | <b>293.69</b> | 569.34   | 285.17   | 568.36   | 284.68   | 4     |

|    |          |          |          |          |          |          |   |        |        |        |        |        |        |   |
|----|----------|----------|----------|----------|----------|----------|---|--------|--------|--------|--------|--------|--------|---|
| 15 | 1,955.12 | 978.06   | 1,938.09 | 969.55   | 1,937.11 | 969.06   | P | 489.32 | 245.16 | 472.29 | 236.65 | 471.30 | 236.16 | 3 |
| 16 | 2,056.16 | 1,028.59 | 2,039.14 | 1,020.07 | 2,038.15 | 1,019.58 | T | 392.26 | 196.63 | 375.24 | 188.12 | 374.25 | 187.63 | 2 |
| 17 |          |          |          |          |          |          | K | 291.21 | 146.11 | 274.19 | 137.60 |        |        | 1 |

Query 4367 Hit 1

MS/MS Fragmentation of **EIAGLVR**

Found in **sp|Q7L5L3|GDPD3\_HUMAN**, Glycerophosphodiester phosphodiesterase domain-containing protein 3 OS=Homo sapiens GN=GDPD3 PE=2 SV=3

Match to Query 4367: 900.5509 from (451.2827, 2+)

Title: 277: Sum of 2 scans in range 701 (rt=25.1827, f=4, i=173) to 702 (rt=25.2081, f=4, i=174)

[D:\lab212\membrane\Grace\Joyce\iTRAQ\_26\_2.raw]

Data File: Submitted from 20120508-1(merge) by Mascot Daemon on JOYCE-VAIO

Monoisotopic mass of neutral peptide Mr(calc): 900.5509

Variable modifications:

Ions Score: 41.71 Expect: 0.035

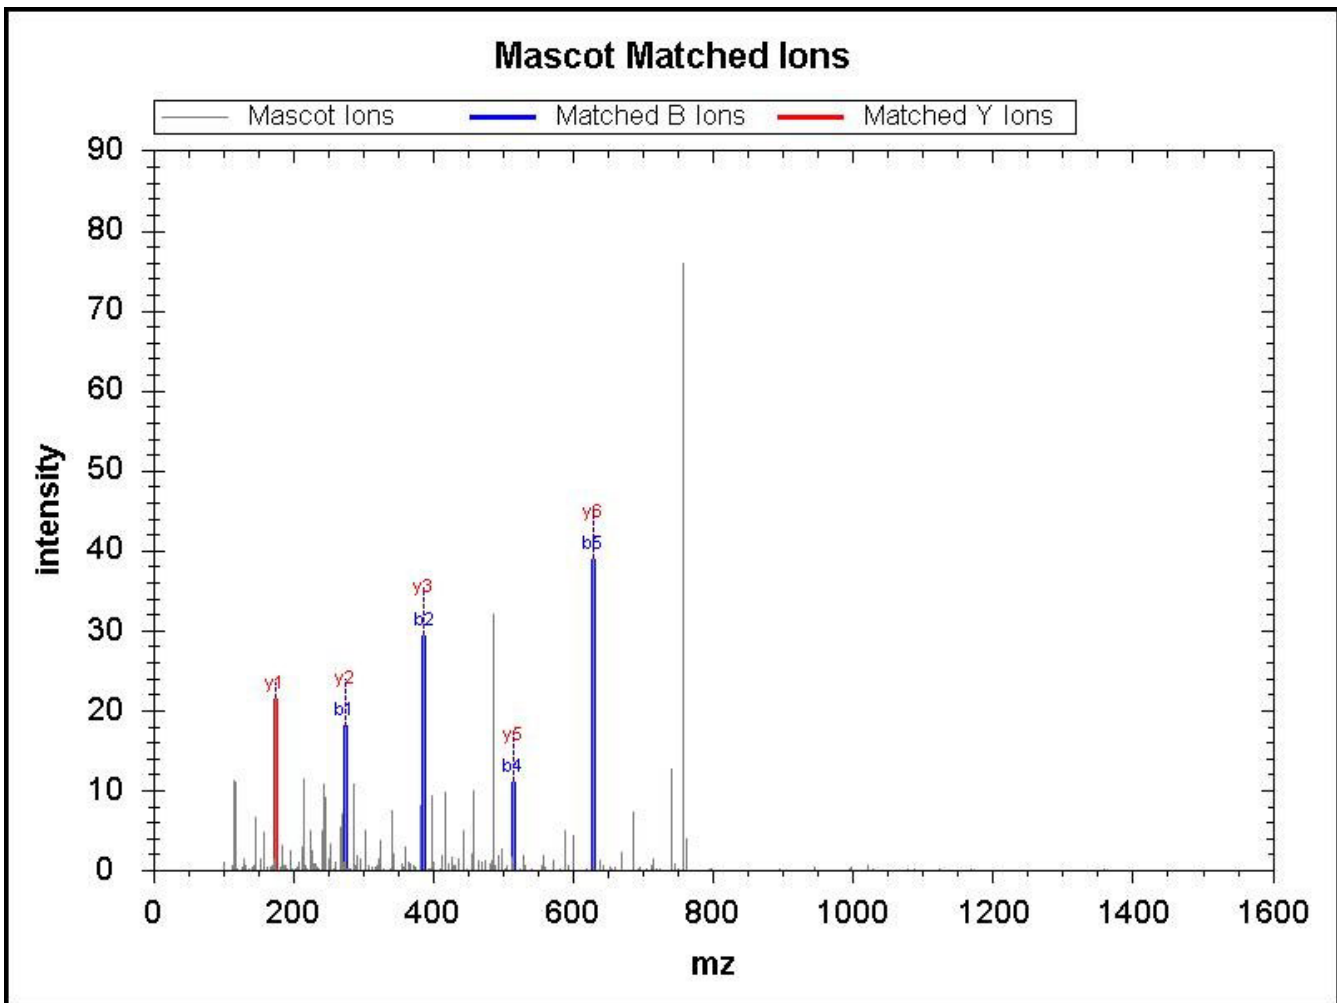

| No | b      | b++    | b0     | b0++   | Seq | y      | y++    | y*     | y*++   | RevNo |
|----|--------|--------|--------|--------|-----|--------|--------|--------|--------|-------|
| 1  | 274.15 | 137.58 | 256.14 | 128.57 | E   |        |        |        |        | 7     |
| 2  | 387.24 | 194.12 | 369.23 | 185.12 | I   | 628.41 | 314.71 | 611.39 | 306.20 | 6     |
| 3  | 458.27 | 229.64 | 440.26 | 220.63 | A   | 515.33 | 258.17 | 498.30 | 249.66 | 5     |
| 4  | 515.29 | 258.15 | 497.28 | 249.15 | G   | 444.29 | 222.65 | 427.27 | 214.14 | 4     |
| 5  | 628.38 | 314.69 | 610.37 | 305.69 | L   | 387.27 | 194.14 | 370.24 | 185.63 | 3     |
| 6  | 727.45 | 364.23 | 709.44 | 355.22 | V   | 274.19 | 137.60 | 257.16 | 129.08 | 2     |
| 7  |        |        |        |        | R   | 175.12 | 88.06  | 158.09 | 79.55  | 1     |

Query 25221 Hit 1

MS/MS Fragmentation of **KVIEYFK**

Found in **sp|Q9BTE3|MCMBP\_HUMAN**, Mini-chromosome maintenance complex-binding protein OS=Homo sapiens GN=MCMBP



PE=1 SV=2

Match to Query 25221: 1357.838from(453.6199,3+)

Title: 286: Scan 1035 (rt=31.5827, f=3, i=97) [D:\lab212\membrane\Grace\Joyce\iTRAQ\_48\_1.raw]

Data File:Submitted from 20120508-1(merge) by Mascot Daemon on JOYCE-VAIO

Monoisotopic mass of neutral peptide Mr(calc): 1357.838

Variable modifications:

K1 :iTRAQ4plex (K)

K7 :iTRAQ4plex (K)

Ions Score: 41.62 Expect: 0.029

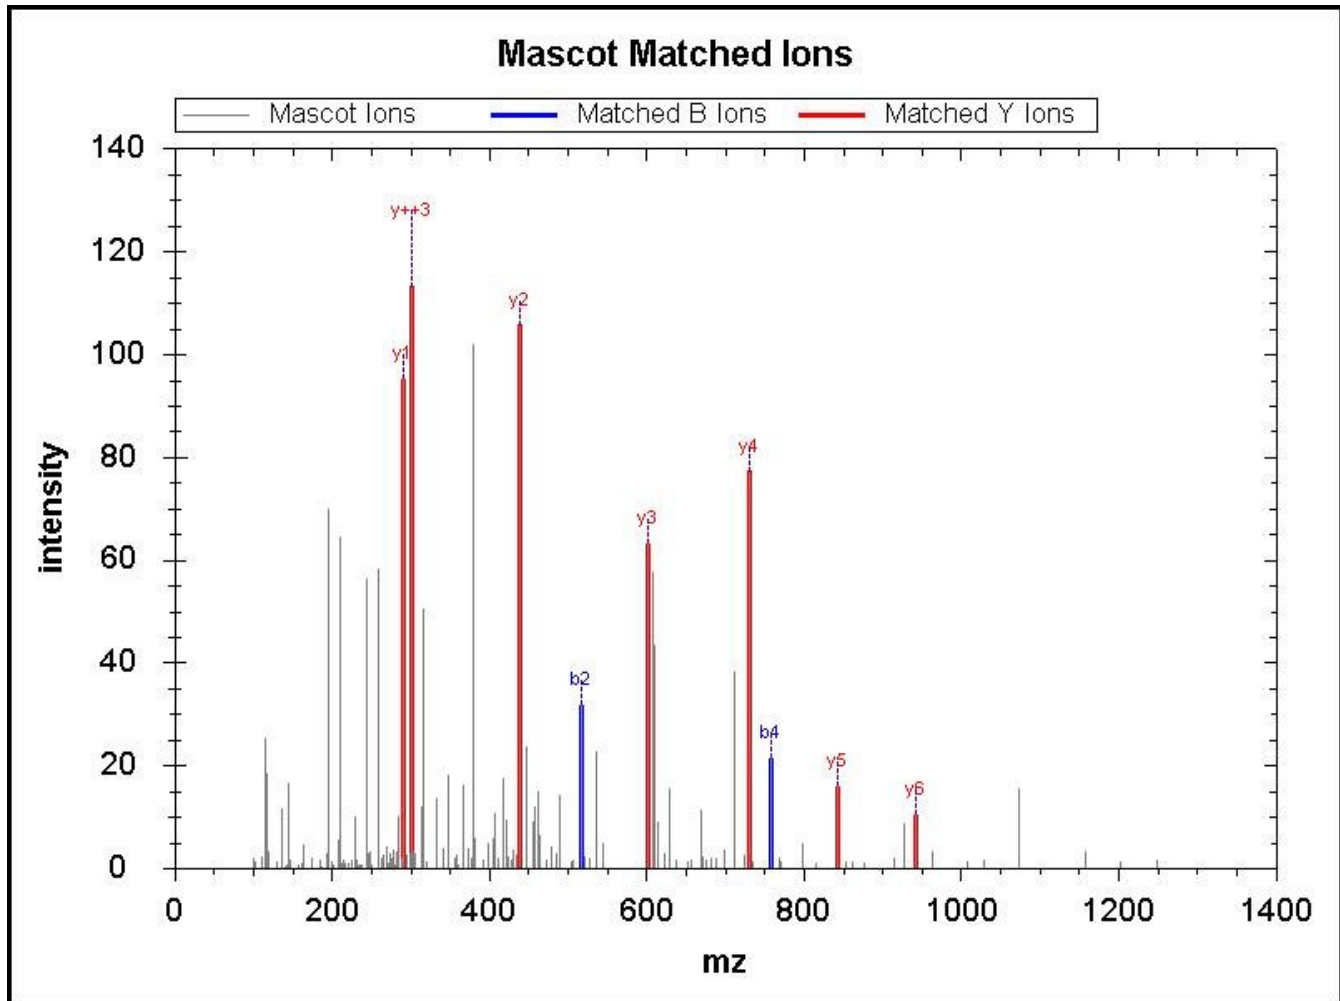

Ions Score: 41.62 Expect: 0.020

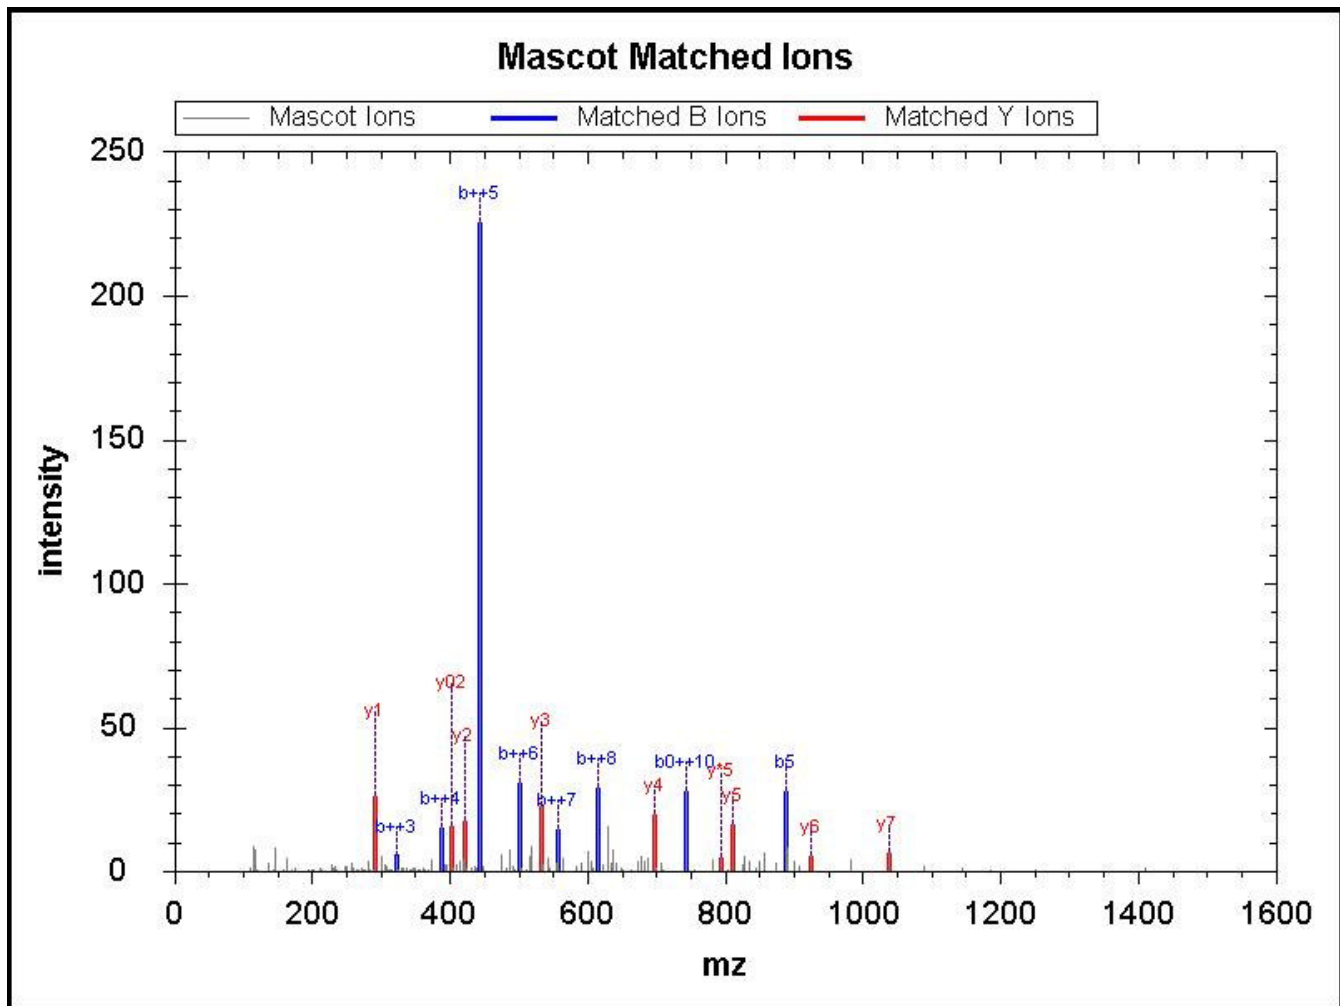

| No | b        | b++    | b*       | b*++   | b0       | b0++   | Seq | y        | y++    | y*       | y*++   | y0       | y0++   | RevNo |
|----|----------|--------|----------|--------|----------|--------|-----|----------|--------|----------|--------|----------|--------|-------|
| 1  | 258.19   | 129.60 |          |        |          |        | I   |          |        |          |        |          |        | 12    |
| 2  | 371.28   | 186.14 |          |        |          |        | L   | 1,665.97 | 833.49 | 1,648.94 | 824.97 | 1,647.96 | 824.48 | 11    |
| 3  | 643.47   | 322.24 | 626.45   | 313.73 |          |        | K   | 1,552.88 | 776.94 | 1,535.86 | 768.43 | 1,534.87 | 767.94 | 10    |
| 4  | 772.52   | 386.76 | 755.49   | 378.25 | 754.51   | 377.76 | E   | 1,280.69 | 640.85 | 1,263.66 | 632.33 | 1,262.67 | 631.84 | 9     |
| 5  | 887.54   | 444.28 | 870.52   | 435.76 | 869.53   | 435.27 | D   | 1,151.64 | 576.33 | 1,134.62 | 567.81 | 1,133.63 | 567.32 | 8     |
| 6  | 1,000.63 | 500.82 | 983.60   | 492.30 | 982.62   | 491.81 | I   | 1,036.62 | 518.81 | 1,019.59 | 510.30 | 1,018.61 | 509.81 | 7     |
| 7  | 1,113.71 | 557.36 | 1,096.69 | 548.85 | 1,095.70 | 548.35 | L   | 923.53   | 462.27 | 906.51   | 453.76 | 905.52   | 453.26 | 6     |
| 8  | 1,227.76 | 614.38 | 1,210.73 | 605.87 | 1,209.74 | 605.38 | N   | 810.45   | 405.73 | 793.42   | 397.21 | 792.44   | 396.72 | 5     |
| 9  | 1,390.82 | 695.91 | 1,373.79 | 687.40 | 1,372.81 | 686.91 | Y   | 696.40   | 348.71 | 679.38   | 340.19 | 678.39   | 339.70 | 4     |
| 10 | 1,503.90 | 752.45 | 1,486.88 | 743.94 | 1,485.89 | 743.45 | L   | 533.34   | 267.17 | 516.31   | 258.66 | 515.33   | 258.17 | 3     |
| 11 | 1,632.95 | 816.98 | 1,615.92 | 808.46 | 1,614.93 | 807.97 | E   | 420.26   | 210.63 | 403.23   | 202.12 | 402.25   | 201.63 | 2     |
| 12 |          |        |          |        |          |        | K   | 291.21   | 146.11 | 274.19   | 137.60 |          |        | 1     |

Query 8489 Hit 1

MS/MS Fragmentation of **MEAQGGK**

Found in **sp|Q8NBP7|PCSK9\_HUMAN**, Proprotein convertase subtilisin/kexin type 9 OS=Homo sapiens GN=PCSK9 PE=1 SV=3  
 Match to Query 8489: 1023.591 from (512.8029, 2+)

Title: 311: Scan 780 (rt=26.9227, f=3, i=106) [D:\lab212\membrane\Grace\Joyce\iTRAQ\_31\_2.raw]

Data File: Submitted from 20120508-1(merge) by Mascot Daemon on JOYCE-VAIO

Monoisotopic mass of neutral peptide Mr(calc): 1023.591

Variable modifications:

M1 :Oxidation (M), 63.99828

K7 :iTRAQ4plex (K)

Ions Score: 41.56 Expect: 0.040

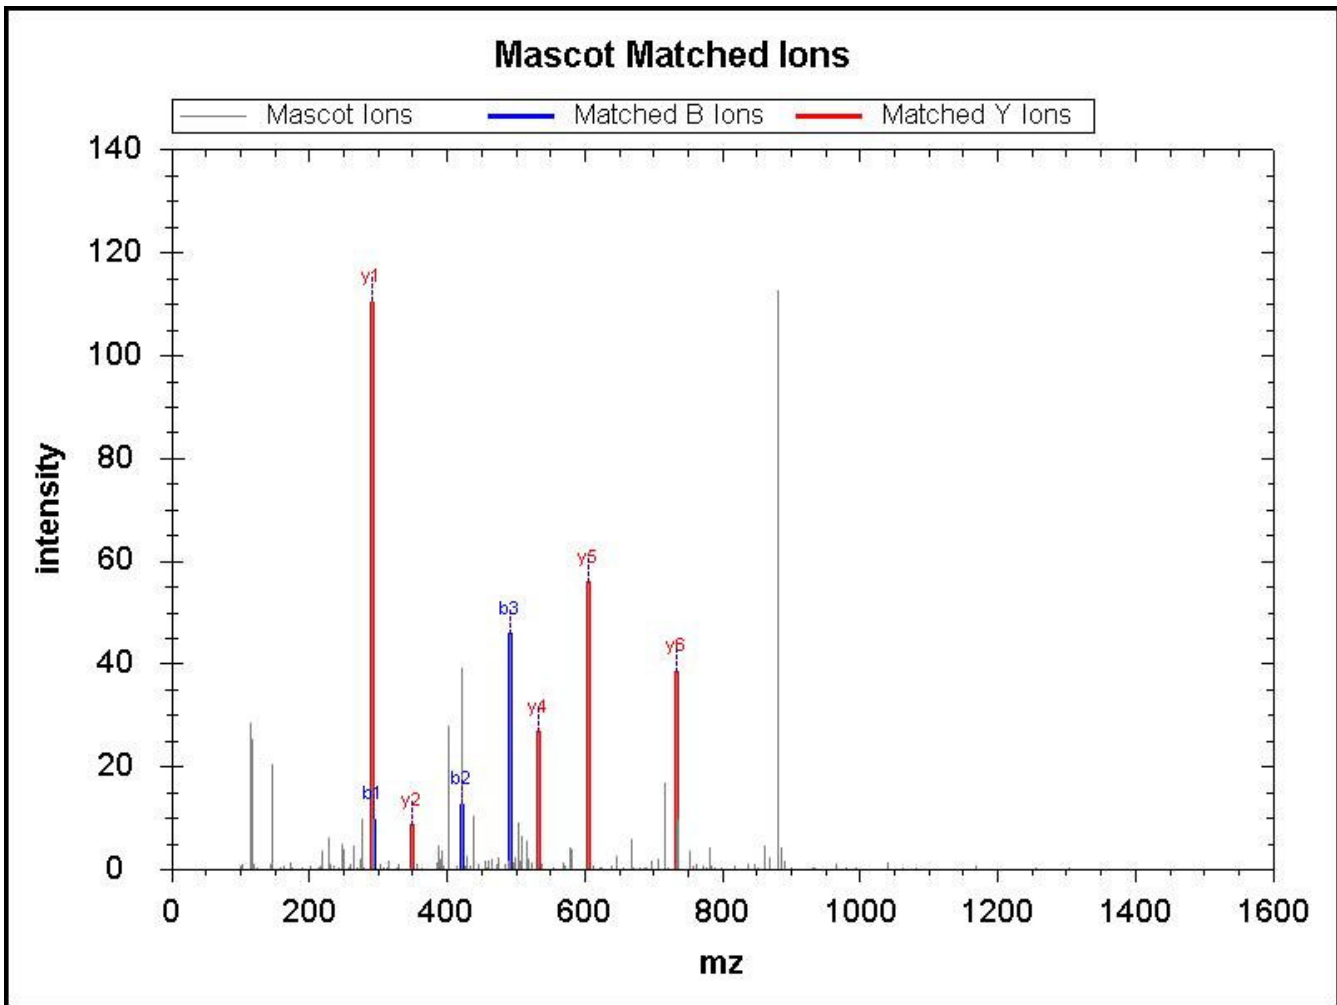

| No | b      | b++    | b*     | b*++   | b0     | b0++   | Seq | y      | y++    | y*     | y*++   | y0     | y0++   | RevNo |
|----|--------|--------|--------|--------|--------|--------|-----|--------|--------|--------|--------|--------|--------|-------|
| 1  | 292.14 | 146.58 |        |        |        |        | M   |        |        |        |        |        |        | 7     |
| 2  | 421.19 | 211.10 |        |        | 403.18 | 202.09 | E   | 733.40 | 367.20 | 716.37 | 358.69 | 715.39 | 358.20 | 6     |
| 3  | 492.22 | 246.62 |        |        | 474.21 | 237.61 | A   | 604.35 | 302.68 | 587.33 | 294.17 |        |        | 5     |
| 4  | 620.28 | 310.65 | 603.26 | 302.13 | 602.27 | 301.64 | Q   | 533.32 | 267.16 | 516.29 | 258.65 |        |        | 4     |
| 5  | 677.30 | 339.16 | 660.28 | 330.64 | 659.29 | 330.15 | G   | 405.26 | 203.13 | 388.23 | 194.62 |        |        | 3     |
| 6  | 734.33 | 367.67 | 717.30 | 359.15 | 716.32 | 358.66 | G   | 348.24 | 174.62 | 331.21 | 166.11 |        |        | 2     |
| 7  |        |        |        |        |        |        | K   | 291.21 | 146.11 | 274.19 | 137.60 |        |        | 1     |

Query 10450 Hit 1

MS/MS Fragmentation of **RIQDLER**

Found in **sp|Q6ZQ06|QN1\_MOUSE**, Protein QN1 homolog OS=Mus musculus GN=Kiaa1009 PE=1 SV=2

Match to Query 10450: 1073.6 from (358.8739, 3+)

Title: 86: Scan 480 (rt=19.5275, f=3, i=31) [D:\lab212\membrane\GraceJoyce\iTRAQ\_46\_2.raw]

Data File: Submitted from 20120508-1 (merge) by Mascot Daemon on JOYCE-VAIO

Monoisotopic mass of neutral peptide Mr(calc): 1073.6

Variable modifications:

Q3 :Deamidated (NQ)

Ions Score: 41.53 Expect: 0.053

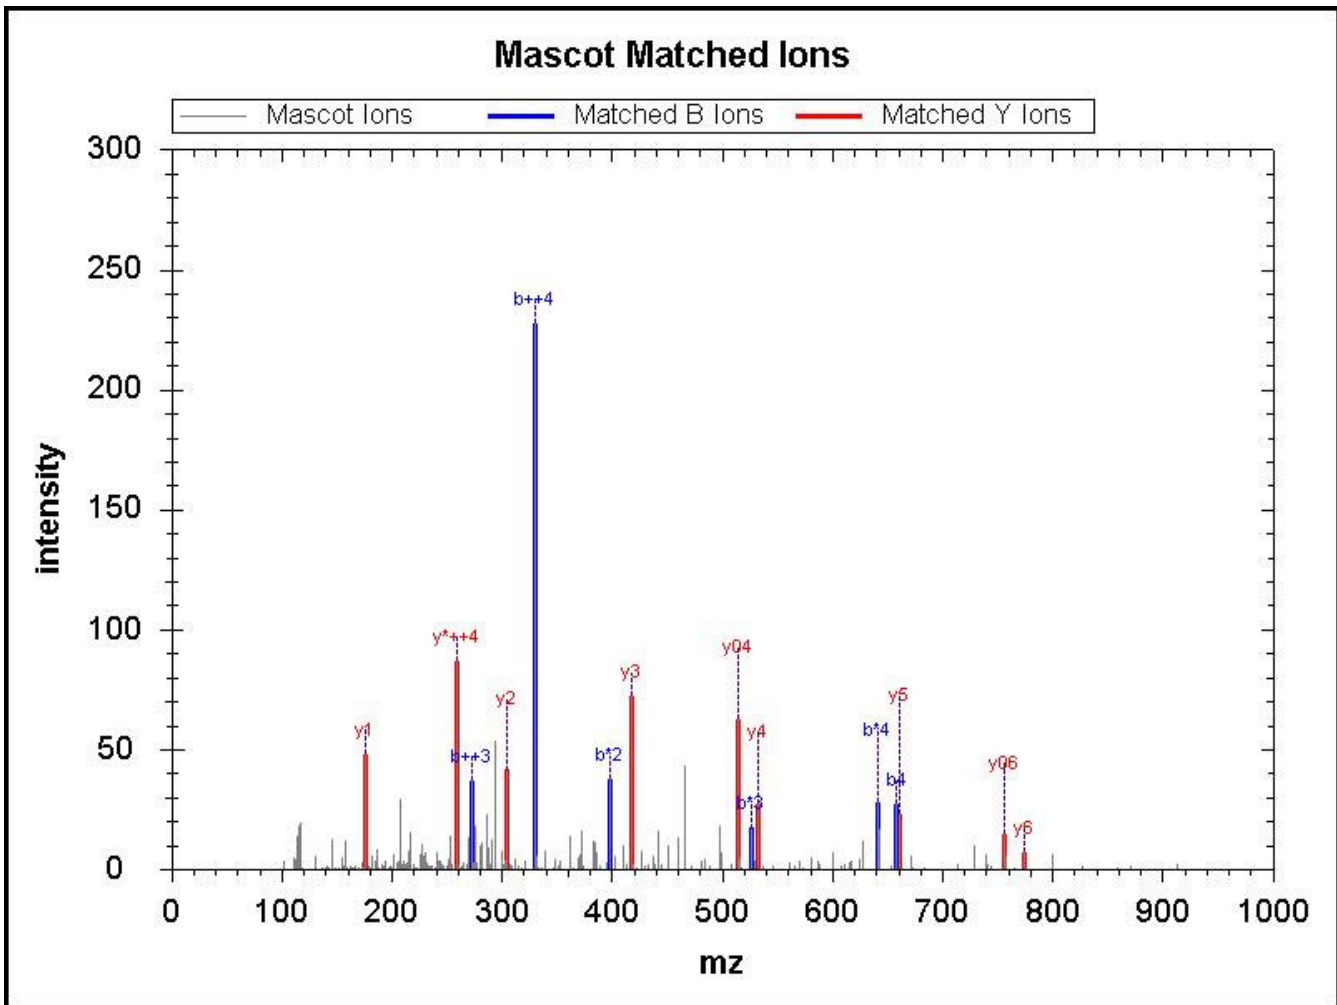

| No | b      | b++    | b*     | b*++   | b0     | b0++   | Seq | y      | y++    | y*     | y*++   | y0     | y0++   | RevNo |
|----|--------|--------|--------|--------|--------|--------|-----|--------|--------|--------|--------|--------|--------|-------|
| 1  | 301.21 | 151.11 | 284.18 | 142.60 |        |        | R   |        |        |        |        |        |        | 7     |
| 2  | 414.29 | 207.65 | 397.27 | 199.14 |        |        | I   | 774.40 | 387.70 | 757.37 | 379.19 | 756.39 | 378.70 | 6     |
| 3  | 543.34 | 272.17 | 526.31 | 263.66 |        |        | Q   | 661.32 | 331.16 | 644.29 | 322.65 | 643.30 | 322.16 | 5     |
| 4  | 658.36 | 329.69 | 641.34 | 321.17 | 640.35 | 320.68 | D   | 532.27 | 266.64 | 515.25 | 258.13 | 514.26 | 257.63 | 4     |
| 5  | 771.45 | 386.23 | 754.42 | 377.71 | 753.44 | 377.22 | L   | 417.25 | 209.13 | 400.22 | 200.61 | 399.24 | 200.12 | 3     |
| 6  | 900.49 | 450.75 | 883.46 | 442.24 | 882.48 | 441.74 | E   | 304.16 | 152.58 | 287.13 | 144.07 | 286.15 | 143.58 | 2     |
| 7  |        |        |        |        |        |        | R   | 175.12 | 88.06  | 158.09 | 79.55  |        |        | 1     |

Query 60772 Hit 1

MS/MS Fragmentation of **GHPDVATMLNILALVYR**

Found in **sp|Q9NSK0|KLC4\_HUMAN**, Kinesin light chain 4 OS=Homo sapiens GN=KLC4 PE=1 SV=3

Match to Query 60772: 2026.119from(676.3803,3+)

Title: 1176: Sum of 2 scans in range 2649 (rt=68.7908, f=2, i=433) to 2650 (rt=68.8162, f=2, i=434)

[D:\lab212\membrane\Grace\Joyce\iTRAQ\_35\_1.raw]

Data File: Submitted from 20120508-1(merge) by Mascot Daemon on JOYCE-VAIO

Monoisotopic mass of neutral peptide Mr(calc): 2026.119

Variable modifications:

Ions Score: 41.51 Expect: 0.050

### Mascot Matched Ions

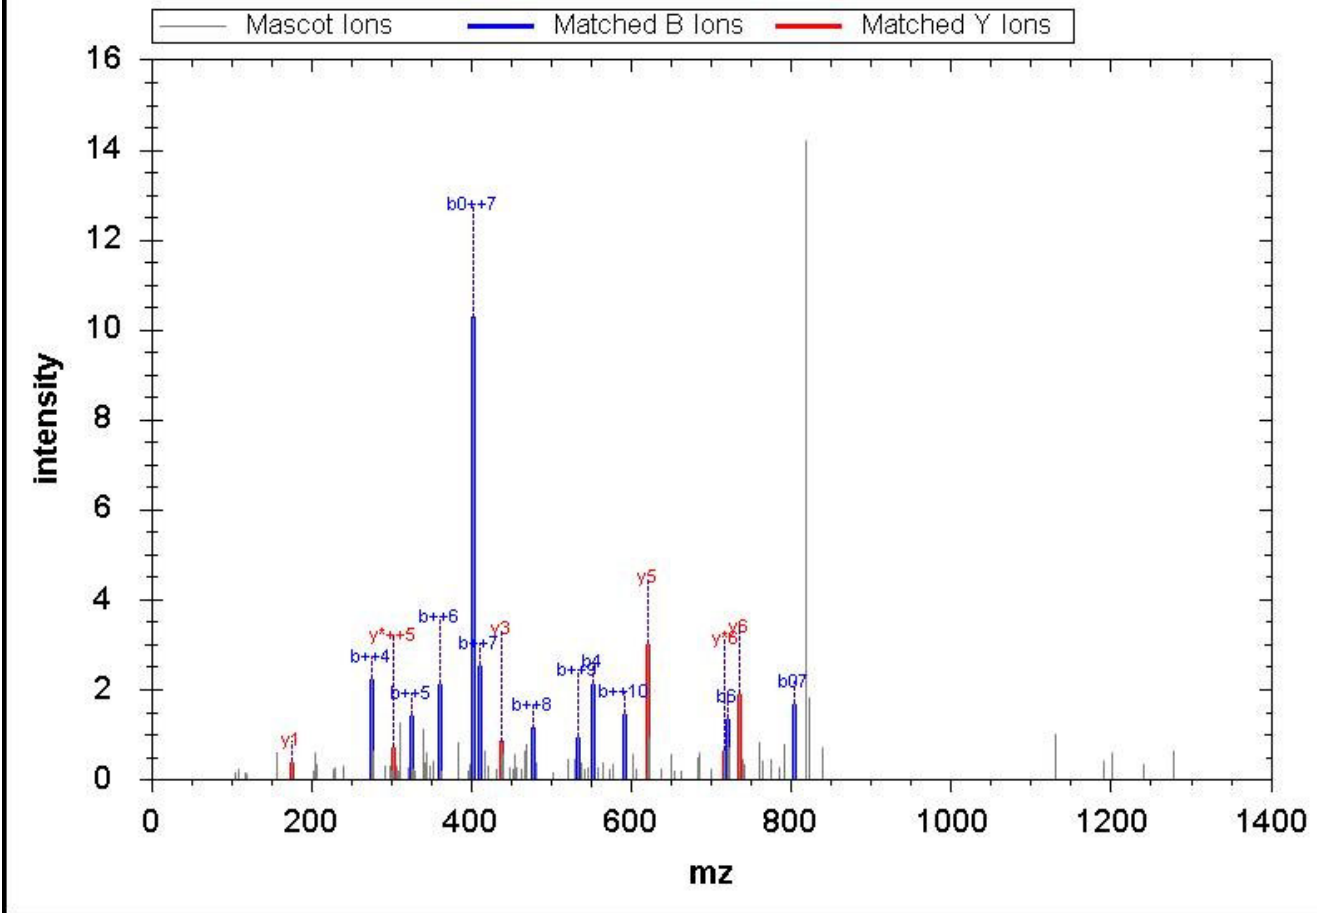

| No | b        | b++    | b*       | b*++   | b0       | b0++   | Seq | y        | y++    | y*       | y*++   | y0       | y0++   | RevNo |
|----|----------|--------|----------|--------|----------|--------|-----|----------|--------|----------|--------|----------|--------|-------|
| 1  | 202.13   | 101.57 |          |        |          |        | G   |          |        |          |        |          |        | 17    |
| 2  | 339.19   | 170.10 |          |        |          |        | H   | 1,826.00 | 913.50 | 1,808.97 | 904.99 | 1,807.99 | 904.50 | 16    |
| 3  | 436.24   | 218.62 |          |        |          |        | P   | 1,688.94 | 844.97 | 1,671.91 | 836.46 | 1,670.93 | 835.97 | 15    |
| 4  | 551.27   | 276.14 |          |        | 533.26   | 267.13 | D   | 1,591.89 | 796.45 | 1,574.86 | 787.93 | 1,573.88 | 787.44 | 14    |
| 5  | 650.34   | 325.67 |          |        | 632.33   | 316.67 | V   | 1,476.86 | 738.93 | 1,459.83 | 730.42 | 1,458.85 | 729.93 | 13    |
| 6  | 721.37   | 361.19 |          |        | 703.36   | 352.19 | A   | 1,377.79 | 689.40 | 1,360.77 | 680.89 | 1,359.78 | 680.39 | 12    |
| 7  | 822.42   | 411.71 |          |        | 804.41   | 402.71 | T   | 1,306.76 | 653.88 | 1,289.73 | 645.37 | 1,288.74 | 644.88 | 11    |
| 8  | 953.46   | 477.24 |          |        | 935.45   | 468.23 | M   | 1,205.71 | 603.36 | 1,188.68 | 594.84 |          |        | 10    |
| 9  | 1,066.55 | 533.78 |          |        | 1,048.54 | 524.77 | L   | 1,074.67 | 537.84 | 1,057.64 | 529.32 |          |        | 9     |
| 10 | 1,180.59 | 590.80 | 1,163.56 | 582.29 | 1,162.58 | 581.79 | N   | 961.58   | 481.30 | 944.56   | 472.78 |          |        | 8     |
| 11 | 1,293.67 | 647.34 | 1,276.65 | 638.83 | 1,275.66 | 638.34 | I   | 847.54   | 424.27 | 830.51   | 415.76 |          |        | 7     |
| 12 | 1,406.76 | 703.88 | 1,389.73 | 695.37 | 1,388.75 | 694.88 | L   | 734.46   | 367.73 | 717.43   | 359.22 |          |        | 6     |
| 13 | 1,477.80 | 739.40 | 1,460.77 | 730.89 | 1,459.78 | 730.40 | A   | 621.37   | 311.19 | 604.35   | 302.68 |          |        | 5     |
| 14 | 1,590.88 | 795.94 | 1,573.85 | 787.43 | 1,572.87 | 786.94 | L   | 550.33   | 275.67 | 533.31   | 267.16 |          |        | 4     |
| 15 | 1,689.95 | 845.48 | 1,672.92 | 836.96 | 1,671.94 | 836.47 | V   | 437.25   | 219.13 | 420.22   | 210.62 |          |        | 3     |
| 16 | 1,853.01 | 927.01 | 1,835.98 | 918.50 | 1,835.00 | 918.00 | Y   | 338.18   | 169.59 | 321.16   | 161.08 |          |        | 2     |
| 17 |          |        |          |        |          |        | R   | 175.12   | 88.06  | 158.09   | 79.55  |          |        | 1     |

Query 35185 Hit 1

MS/MS Fragmentation of **KEQEQLQARLR**

Found in **sp|Q8TDN1|KCNG4\_HUMAN**, Potassium voltage-gated channel subfamily G member 4 OS=Homo sapiens GN=KCNG4 PE=2 SV=1

Match to Query 35185: 1541.906from(514.9758,3+)

Title: 367: Scan 873 (rt=29.2602, f=3, i=128) [D:\lab212\membrane\Grace\Joyce\iTRAQ\_44\_2.raw]

Data File:Submitted from 20120508-1(merge) by Mascot Daemon on JOYCE-VAIO  
 Monoisotopic mass of neutral peptide Mr(calc): 1541.906  
 Variable modifications:  
 K1 :iTRAQ4plex (K)  
 Ions Score: 41.48 Expect: 0.037

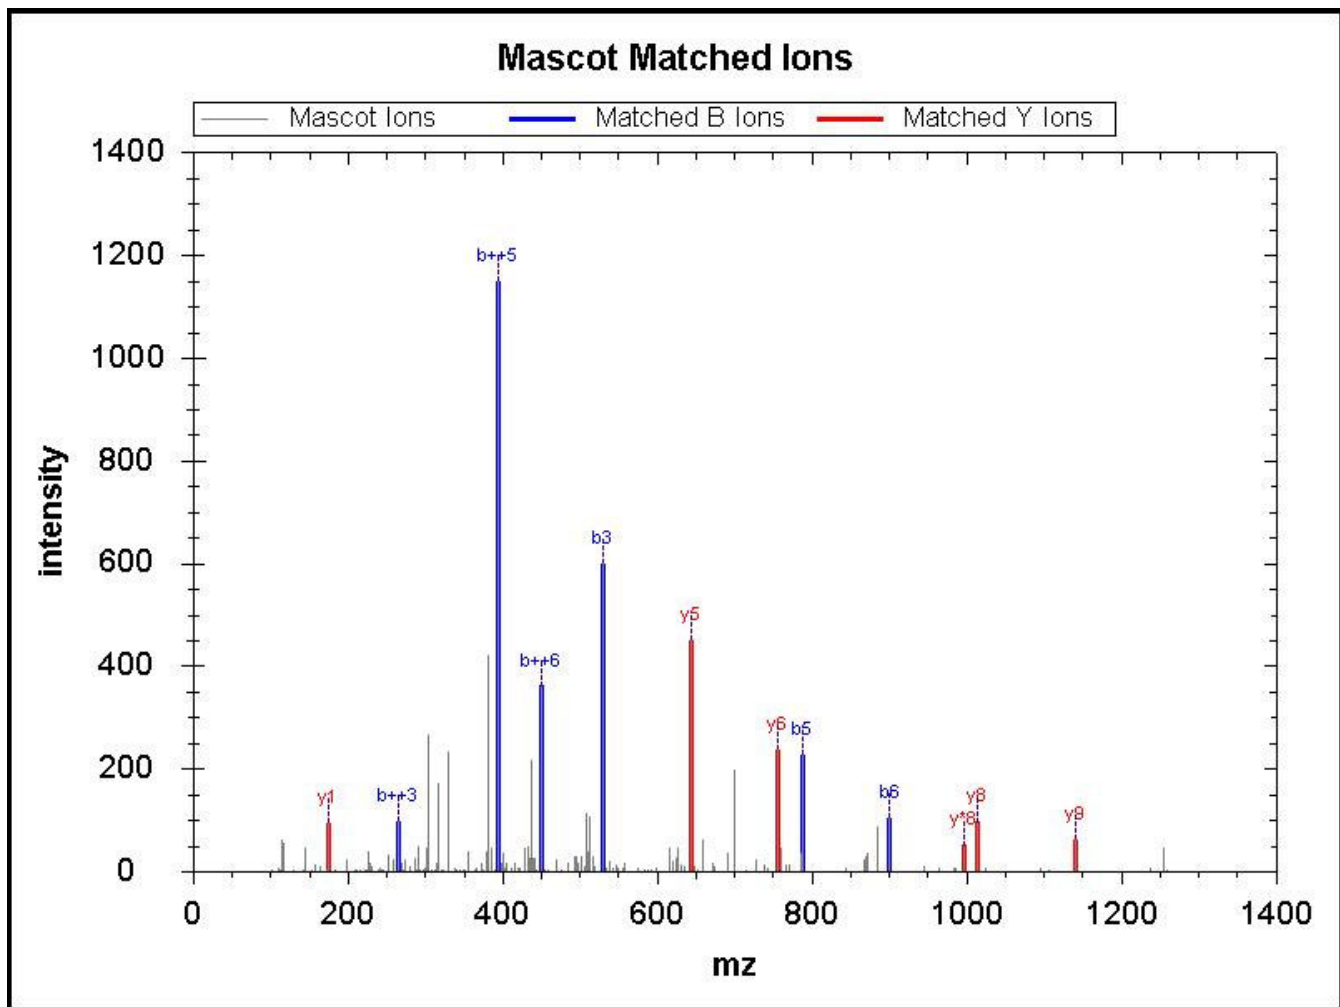

| No | b        | b++    | b*       | b*++   | b0       | b0++   | Seq | y        | y++    | y*       | y*++   | y0       | y0++   | RevNo |
|----|----------|--------|----------|--------|----------|--------|-----|----------|--------|----------|--------|----------|--------|-------|
| 1  | 273.20   | 137.11 | 256.18   | 128.59 |          |        | K   |          |        |          |        |          |        | 11    |
| 2  | 402.25   | 201.63 | 385.22   | 193.11 | 384.24   | 192.62 | E   | 1,270.69 | 635.85 | 1,253.66 | 627.33 | 1,252.68 | 626.84 | 10    |
| 3  | 530.31   | 265.66 | 513.28   | 257.14 | 512.29   | 256.65 | Q   | 1,141.64 | 571.33 | 1,124.62 | 562.81 | 1,123.63 | 562.32 | 9     |
| 4  | 659.35   | 330.18 | 642.32   | 321.66 | 641.34   | 321.17 | E   | 1,013.59 | 507.30 | 996.56   | 498.78 | 995.57   | 498.29 | 8     |
| 5  | 787.41   | 394.21 | 770.38   | 385.69 | 769.40   | 385.20 | Q   | 884.54   | 442.77 | 867.52   | 434.26 |          |        | 7     |
| 6  | 900.49   | 450.75 | 883.46   | 442.24 | 882.48   | 441.74 | L   | 756.48   | 378.75 | 739.46   | 370.23 |          |        | 6     |
| 7  | 1,028.55 | 514.78 | 1,011.52 | 506.27 | 1,010.54 | 505.77 | Q   | 643.40   | 322.20 | 626.37   | 313.69 |          |        | 5     |
| 8  | 1,099.59 | 550.30 | 1,082.56 | 541.78 | 1,081.58 | 541.29 | A   | 515.34   | 258.17 | 498.31   | 249.66 |          |        | 4     |
| 9  | 1,255.69 | 628.35 | 1,238.66 | 619.83 | 1,237.68 | 619.34 | R   | 444.30   | 222.66 | 427.28   | 214.14 |          |        | 3     |
| 10 | 1,368.77 | 684.89 | 1,351.75 | 676.38 | 1,350.76 | 675.88 | L   | 288.20   | 144.61 | 271.18   | 136.09 |          |        | 2     |
| 11 |          |        |          |        |          |        | R   | 175.12   | 88.06  | 158.09   | 79.55  |          |        | 1     |

Query 12025 Hit 1

MS/MS Fragmentation of **QCAQQILR**

Found in **sp|Q8VEG0|CCD71\_MOUSE**, Coiled-coil domain-containing protein 71 OS=Mus musculus GN=Ccdc71 PE=2 SV=1  
 Match to Query 12025: 1105.558from(553.7864,2+)

Title: 233: Scan 620 (rt=23.3111, f=3, i=81) [D:\lab212\membrane\Grace\Joyce\iTRAQ\_25\_2.raw]

Data File:Submitted from 20120508-1(merge) by Mascot Daemon on JOYCE-VAIO

Monoisotopic mass of neutral peptide Mr(calc): 1105.558

Variable modifications:

Q1 :Deamidated (NQ)

Q4 :Deamidated (NQ)  
 Q5 :Deamidated (NQ)  
 Ions Score: 41.41 Expect: 0.057

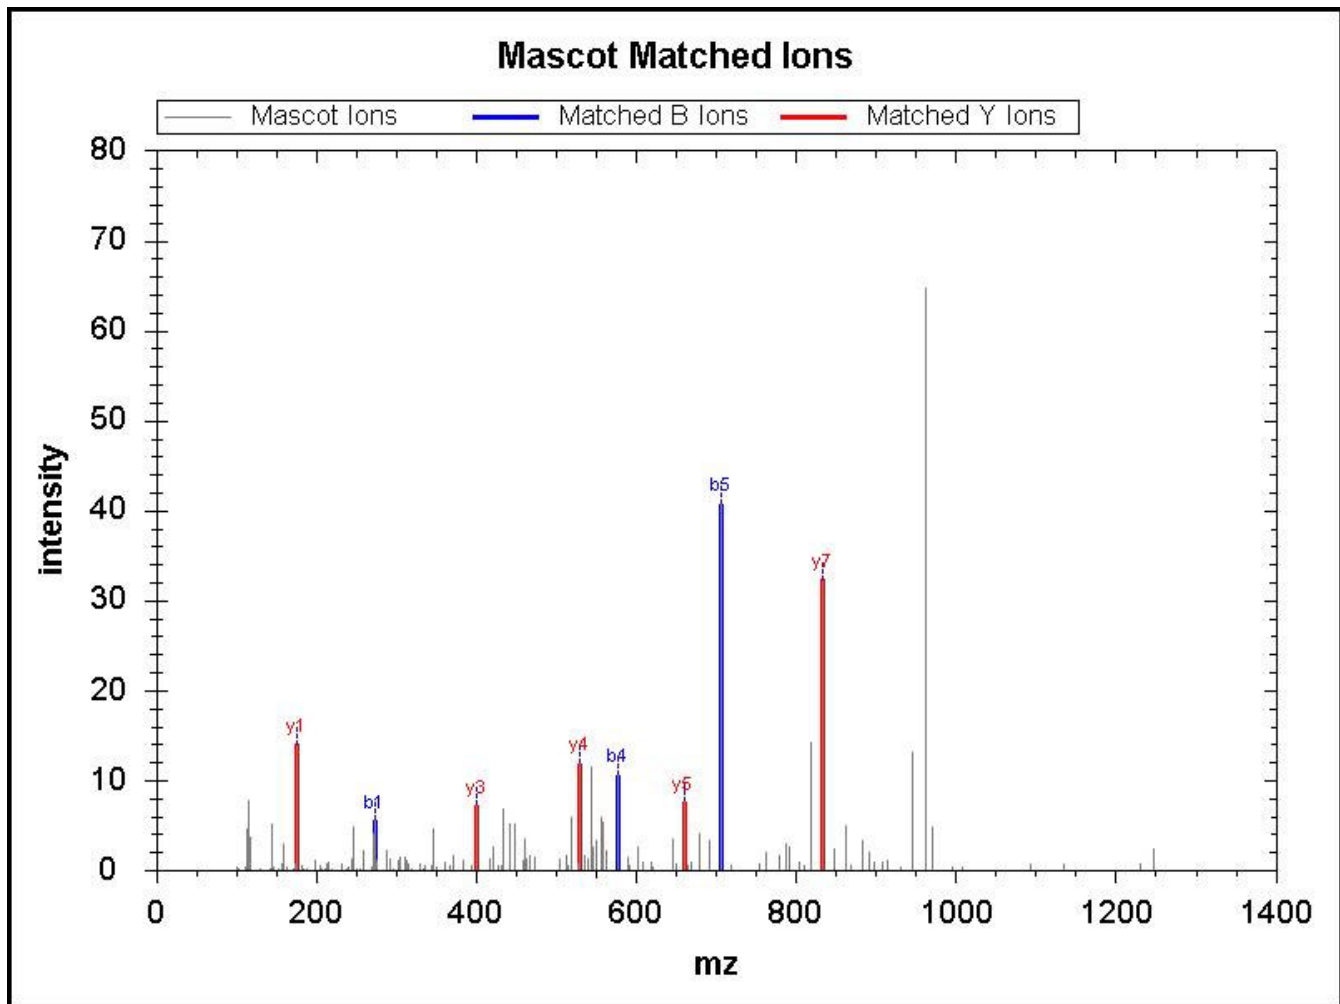

| No | b      | b++    | b*     | b*++   | Seq | y      | y++    | y*     | y*++   | RevNo |
|----|--------|--------|--------|--------|-----|--------|--------|--------|--------|-------|
| 1  | 274.15 | 137.58 | 257.13 | 129.07 | Q   |        |        |        |        | 8     |
| 2  | 377.16 | 189.08 | 360.13 | 180.57 | C   | 833.42 | 417.21 | 816.39 | 408.70 | 7     |
| 3  | 448.20 | 224.60 | 431.17 | 216.09 | A   | 730.41 | 365.71 | 713.38 | 357.20 | 6     |
| 4  | 577.24 | 289.12 | 560.21 | 280.61 | Q   | 659.37 | 330.19 | 642.35 | 321.68 | 5     |
| 5  | 706.28 | 353.65 | 689.26 | 345.13 | Q   | 530.33 | 265.67 | 513.30 | 257.16 | 4     |
| 6  | 819.37 | 410.19 | 802.34 | 401.67 | I   | 401.29 | 201.15 | 384.26 | 192.63 | 3     |
| 7  | 932.45 | 466.73 | 915.42 | 458.22 | L   | 288.20 | 144.61 | 271.18 | 136.09 | 2     |
| 8  |        |        |        |        | R   | 175.12 | 88.06  | 158.09 | 79.55  | 1     |

Query 21964 Hit 1

MS/MS Fragmentation of **AEAEAAVHGAR**

Found in **sp|Q5T8P6|RBM26\_HUMAN**, RNA-binding protein 26 OS=Homo sapiens GN=RBM26 PE=1 SV=3

Match to Query 21964: 1295.591 from(432.871,3+)

Title: 75: Scan 213 (rt=14.5431, f=3, i=27) [D:\lab212\membrane\GraceJoyce\iTRAQ40.raw]

Data File: Submitted from 20120508-1(merge) by Mascot Daemon on JOYCE-VAIO

Monoisotopic mass of neutral peptide Mr(calc): 1295.591

Variable modifications:

Ions Score: 41.38 Expect: 0.036

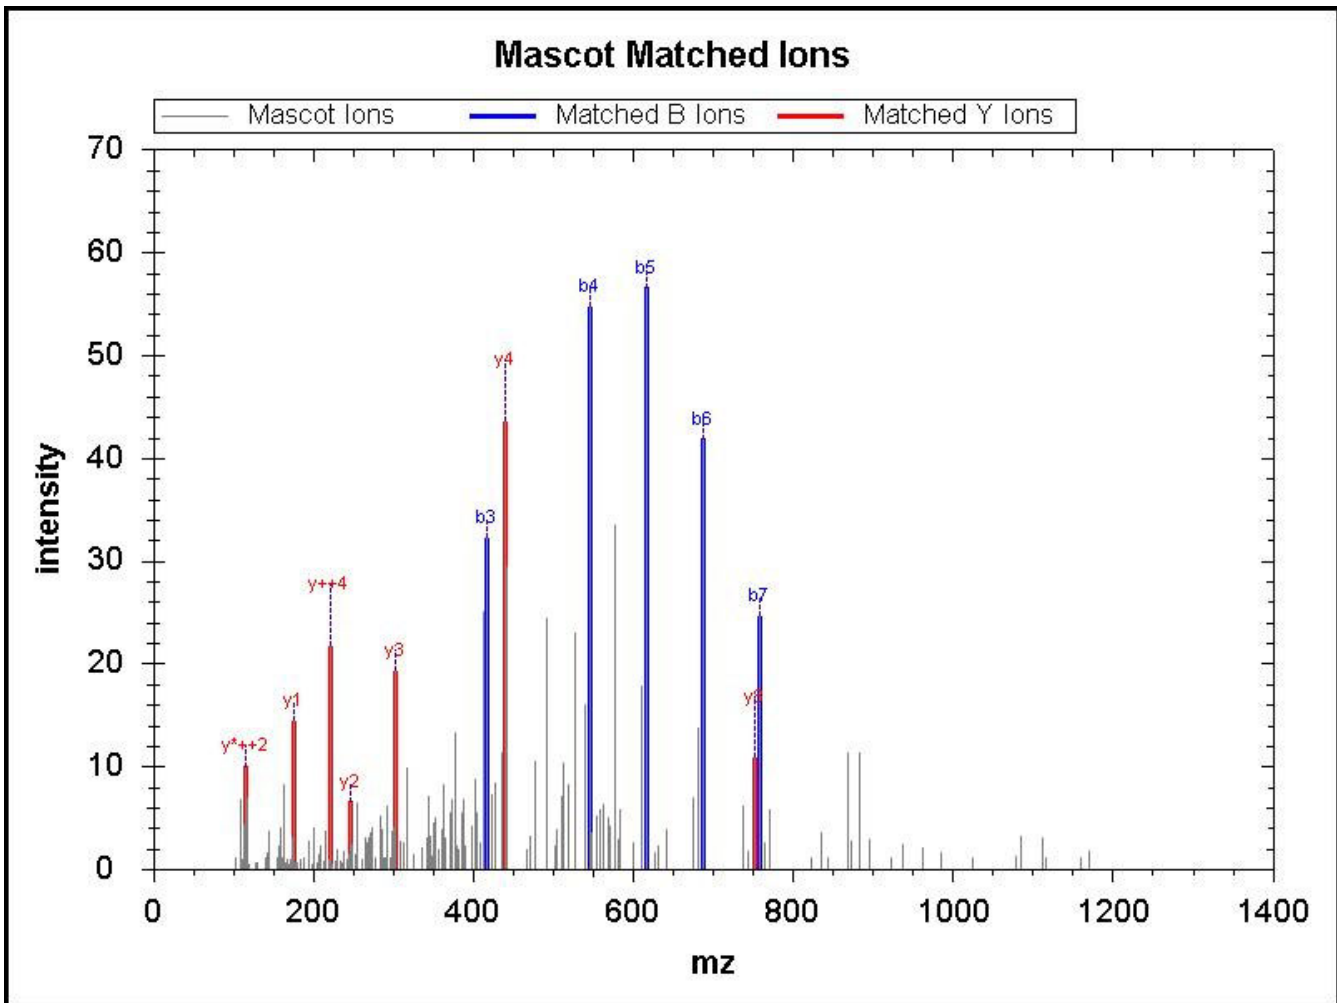

| No | b        | b++    | b0       | b0++   | Seq | y        | y++    | y*       | y*++   | y0       | y0++   | RevNo |
|----|----------|--------|----------|--------|-----|----------|--------|----------|--------|----------|--------|-------|
| 1  | 216.15   | 108.58 |          |        | A   |          |        |          |        |          |        | 12    |
| 2  | 345.19   | 173.10 | 327.18   | 164.09 | E   | 1,081.54 | 541.27 | 1,064.51 | 532.76 | 1,063.53 | 532.27 | 11    |
| 3  | 416.23   | 208.62 | 398.22   | 199.61 | A   | 952.50   | 476.75 | 935.47   | 468.24 | 934.49   | 467.75 | 10    |
| 4  | 545.27   | 273.14 | 527.26   | 264.13 | E   | 881.46   | 441.23 | 864.43   | 432.72 | 863.45   | 432.23 | 9     |
| 5  | 616.31   | 308.66 | 598.30   | 299.65 | A   | 752.42   | 376.71 | 735.39   | 368.20 |          |        | 8     |
| 6  | 687.34   | 344.18 | 669.33   | 335.17 | A   | 681.38   | 341.19 | 664.35   | 332.68 |          |        | 7     |
| 7  | 758.38   | 379.69 | 740.37   | 370.69 | A   | 610.34   | 305.67 | 593.32   | 297.16 |          |        | 6     |
| 8  | 857.45   | 429.23 | 839.44   | 420.22 | V   | 539.30   | 270.16 | 522.28   | 261.64 |          |        | 5     |
| 9  | 994.51   | 497.76 | 976.50   | 488.75 | H   | 440.24   | 220.62 | 423.21   | 212.11 |          |        | 4     |
| 10 | 1,051.53 | 526.27 | 1,033.52 | 517.26 | G   | 303.18   | 152.09 | 286.15   | 143.58 |          |        | 3     |
| 11 | 1,122.57 | 561.79 | 1,104.56 | 552.78 | A   | 246.16   | 123.58 | 229.13   | 115.07 |          |        | 2     |
| 12 |          |        |          |        | R   | 175.12   | 88.06  | 158.09   | 79.55  |          |        | 1     |

Query 11927 Hit 1

MS/MS Fragmentation of IAWALNK

Found in sp|Q9UPN6|SCAF8\_HUMAN, Protein SCAF8 OS=Homo sapiens GN=SCAF8 PE=1 SV=1

Match to Query 11927: 1102.676from(552.3451,2+)

Title: 550: Scan 1280 (rt=38.209, f=2, i=196) [D:\lab212\membrane\Grace\Joyce\iTRAQ\_33\_1.raw]

Data File: Submitted from 20120508-1(merge) by Mascot Daemon on JOYCE-VAIO

Monoisotopic mass of neutral peptide Mr(calc): 1102.676

Variable modifications:

K7 iTRAQ4plex (K)

Ions Score: 41.23 Expect: 0.048



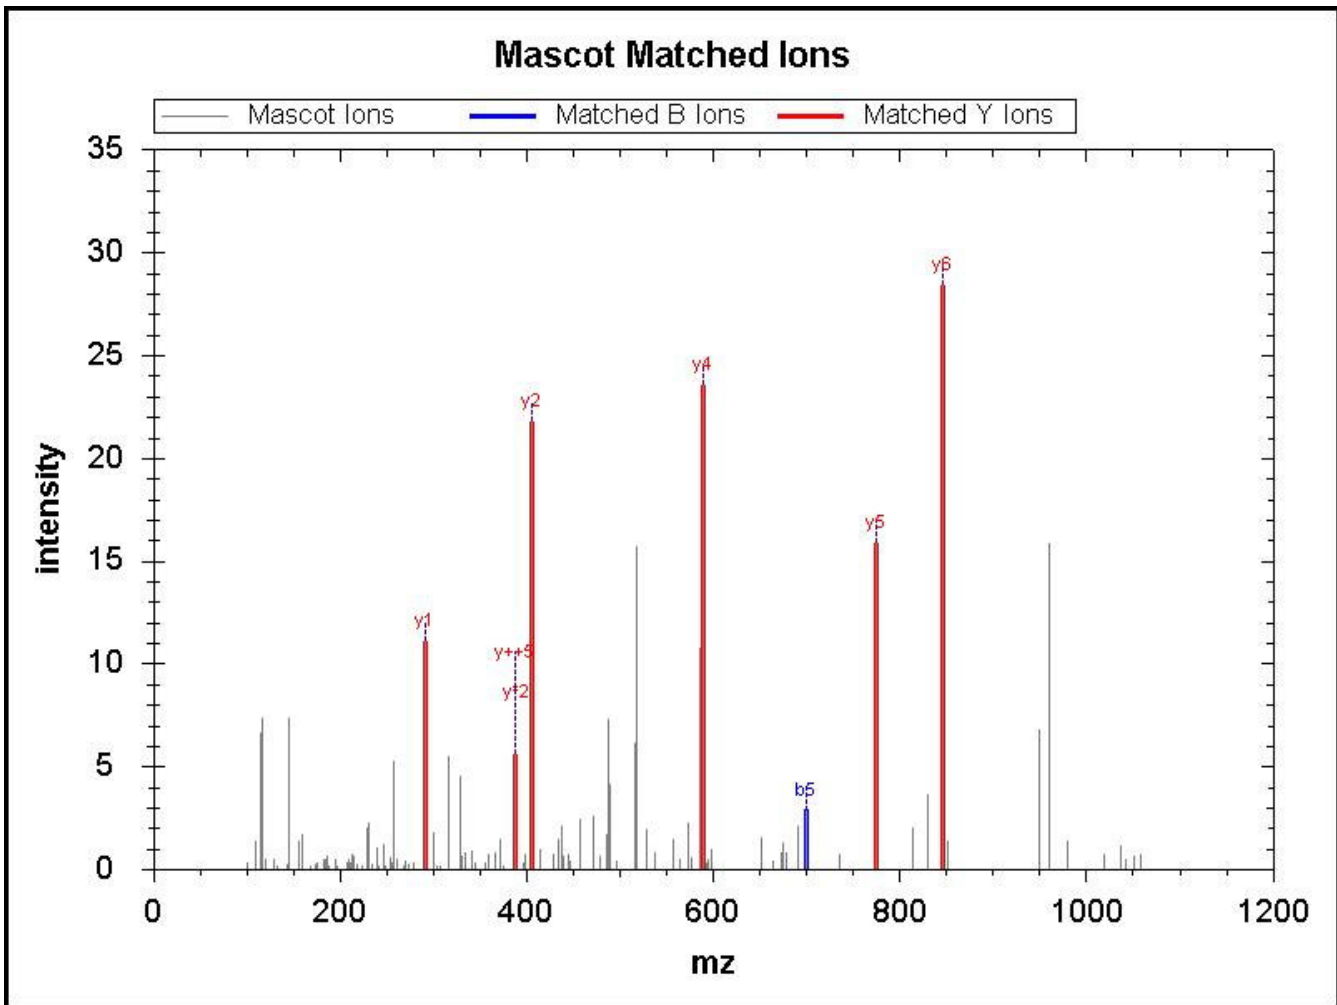

| No | b      | b++    | b*     | b*++   | Seq | y      | y++    | y*     | y*++   | RevNo |
|----|--------|--------|--------|--------|-----|--------|--------|--------|--------|-------|
| 1  | 258.19 | 129.60 |        |        | I   |        |        |        |        | 7     |
| 2  | 329.23 | 165.12 |        |        | A   | 846.50 | 423.75 | 829.47 | 415.24 | 6     |
| 3  | 515.31 | 258.16 |        |        | W   | 775.46 | 388.23 | 758.43 | 379.72 | 5     |
| 4  | 586.35 | 293.68 |        |        | A   | 589.38 | 295.19 | 572.35 | 286.68 | 4     |
| 5  | 699.43 | 350.22 |        |        | L   | 518.34 | 259.67 | 501.32 | 251.16 | 3     |
| 6  | 813.47 | 407.24 | 796.45 | 398.73 | N   | 405.26 | 203.13 | 388.23 | 194.62 | 2     |
| 7  |        |        |        |        | K   | 291.21 | 146.11 | 274.19 | 137.60 | 1     |

Query 65983 Hit 1

MS/MS Fragmentation of **EISNLNQLIEEFKK**

Found in **sp|Q14789|GOLGB1\_HUMAN**, Golgin subfamily B member 1 OS=Homo sapiens GN=GOLGB1 PE=1 SV=2

Match to Query 65983: 2136.221 from (713.0811,3+)

Title: 929: Scan 2039 (rt=55.5326, f=3, i=316) [D:\lab212\membrane\Grace\Joyce\iTRAQ\_44\_2.raw]

Data File: Submitted from 20120508-1(merge) by Mascot Daemon on JOYCE-VAIO

Monoisotopic mass of neutral peptide Mr(calc): 2136.221

Variable modifications:

K13 :iTRAQ4plex (K)

K14 :iTRAQ4plex (K)

Ions Score: 41.13 Expect: 0.037



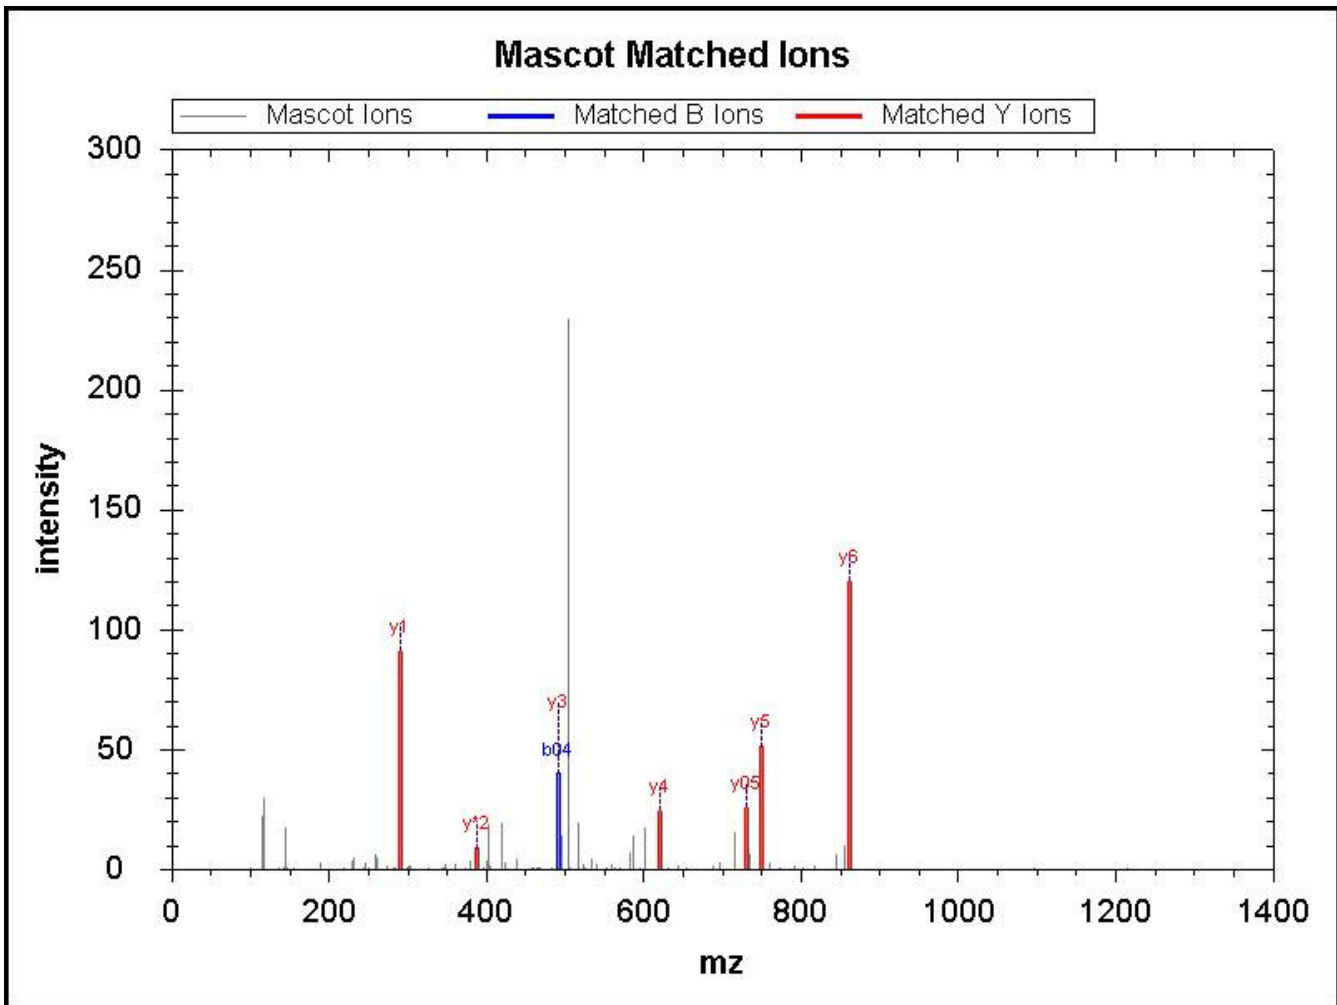

| No | b      | b++    | b0     | b0++   | Seq | y      | y++    | y*     | y*++   | y0     | y0++   | RevNo |
|----|--------|--------|--------|--------|-----|--------|--------|--------|--------|--------|--------|-------|
| 1  | 138.07 | 69.54  |        |        | H   |        |        |        |        |        |        | 7     |
| 2  | 251.15 | 126.08 |        |        | L   | 862.50 | 431.75 | 845.47 | 423.24 | 844.49 | 422.75 | 6     |
| 3  | 380.19 | 190.60 | 362.18 | 181.59 | E   | 749.42 | 375.21 | 732.39 | 366.70 | 731.41 | 366.21 | 5     |
| 4  | 509.24 | 255.12 | 491.22 | 246.12 | E   | 620.37 | 310.69 | 603.35 | 302.18 | 602.36 | 301.69 | 4     |
| 5  | 596.27 | 298.64 | 578.26 | 289.63 | S   | 491.33 | 246.17 | 474.30 | 237.66 | 473.32 | 237.16 | 3     |
| 6  | 709.35 | 355.18 | 691.34 | 346.17 | I   | 404.30 | 202.65 | 387.27 | 194.14 |        |        | 2     |
| 7  |        |        |        |        | K   | 291.21 | 146.11 | 274.19 | 137.60 |        |        | 1     |

Query 97485 Hit 1

MS/MS Fragmentation of **DALVQPLTSQGV~~Q~~DVV~~AL~~MDTY~~YL~~MK**

Found in **sp|P35251|RFC1\_HUMAN**, Replication factor C subunit 1 OS=Homo sapiens GN=RFC1 PE=1 SV=4

Match to Query 97485: 3456.776from(865.2013,4+)

Title: 1312: Sum of 2 scans in range 2993 (rt=76.5257, f=4, i=869) to 2994 (rt=76.5511, f=4, i=870)

[D:\lab212\membrane\Grace\Joyce\iTRAQ\_22\_1.raw]

Data File:Submitted from 20120508-1(merge) by Mascot Daemon on JOYCE-VAIO

Monoisotopic mass of neutral peptide Mr(calc): 3456.776

Variable modifications:

K29 :iTRAQ4plex (K)

Ions Score: 41.09 Expect: 0.059

### Mascot Matched Ions

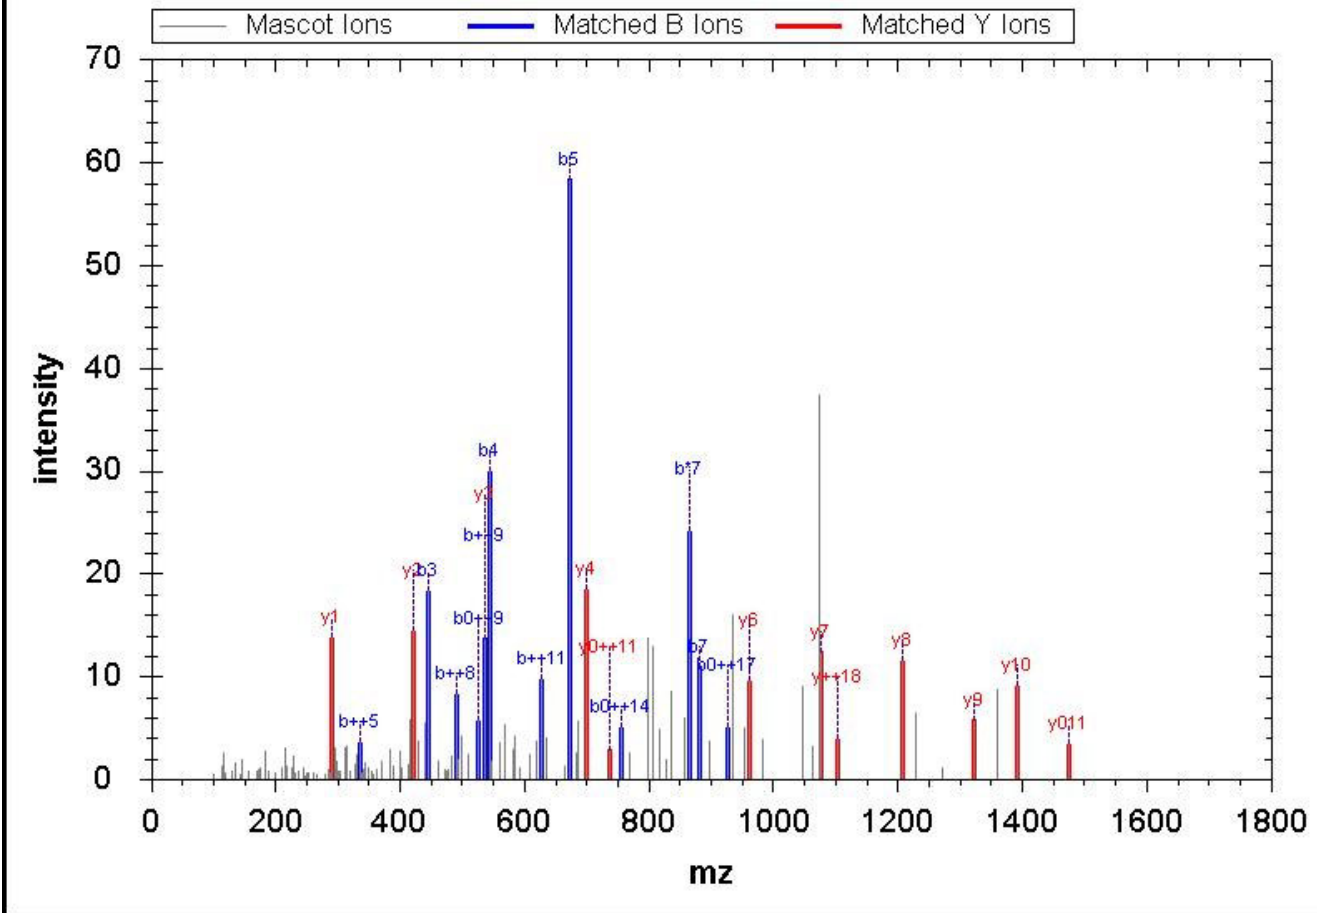

| No | b        | b++      | b*       | b*++     | b0       | b0++     | Seq | y        | y++      | y*       | y*++     | y0       | y0++     | RevNo |
|----|----------|----------|----------|----------|----------|----------|-----|----------|----------|----------|----------|----------|----------|-------|
| 1  | 260.14   | 130.57   |          |          | 242.13   | 121.57   | D   |          |          |          |          |          |          | 29    |
| 2  | 331.17   | 166.09   |          |          | 313.16   | 157.09   | A   | 3,198.65 | 1,599.83 | 3,181.63 | 1,591.32 | 3,180.64 | 1,590.83 | 28    |
| 3  | 444.26   | 222.63   |          |          | 426.25   | 213.63   | L   | 3,127.62 | 1,564.31 | 3,110.59 | 1,555.80 | 3,109.61 | 1,555.31 | 27    |
| 4  | 543.33   | 272.17   |          |          | 525.32   | 263.16   | V   | 3,014.53 | 1,507.77 | 2,997.51 | 1,499.26 | 2,996.52 | 1,498.77 | 26    |
| 5  | 671.38   | 336.20   | 654.36   | 327.68   | 653.37   | 327.19   | Q   | 2,915.46 | 1,458.24 | 2,898.44 | 1,449.72 | 2,897.45 | 1,449.23 | 25    |
| 6  | 768.44   | 384.72   | 751.41   | 376.21   | 750.43   | 375.72   | P   | 2,787.41 | 1,394.21 | 2,770.38 | 1,385.69 | 2,769.40 | 1,385.20 | 24    |
| 7  | 881.52   | 441.26   | 864.49   | 432.75   | 863.51   | 432.26   | L   | 2,690.35 | 1,345.68 | 2,673.33 | 1,337.17 | 2,672.34 | 1,336.68 | 23    |
| 8  | 982.57   | 491.79   | 965.54   | 483.27   | 964.56   | 482.78   | T   | 2,577.27 | 1,289.14 | 2,560.24 | 1,280.63 | 2,559.26 | 1,280.13 | 22    |
| 9  | 1,069.60 | 535.30   | 1,052.57 | 526.79   | 1,051.59 | 526.30   | S   | 2,476.22 | 1,238.61 | 2,459.20 | 1,230.10 | 2,458.21 | 1,229.61 | 21    |
| 10 | 1,197.66 | 599.33   | 1,180.63 | 590.82   | 1,179.65 | 590.33   | Q   | 2,389.19 | 1,195.10 | 2,372.16 | 1,186.59 | 2,371.18 | 1,186.09 | 20    |
| 11 | 1,254.68 | 627.84   | 1,237.65 | 619.33   | 1,236.67 | 618.84   | G   | 2,261.13 | 1,131.07 | 2,244.10 | 1,122.56 | 2,243.12 | 1,122.06 | 19    |
| 12 | 1,353.75 | 677.38   | 1,336.72 | 668.87   | 1,335.74 | 668.37   | V   | 2,204.11 | 1,102.56 | 2,187.08 | 1,094.05 | 2,186.10 | 1,093.55 | 18    |
| 13 | 1,468.78 | 734.89   | 1,451.75 | 726.38   | 1,450.77 | 725.89   | D   | 2,105.04 | 1,053.02 | 2,088.01 | 1,044.51 | 2,087.03 | 1,044.02 | 17    |
| 14 | 1,525.80 | 763.40   | 1,508.77 | 754.89   | 1,507.79 | 754.40   | G   | 1,990.01 | 995.51   | 1,972.99 | 987.00   | 1,972.00 | 986.51   | 16    |
| 15 | 1,624.87 | 812.94   | 1,607.84 | 804.42   | 1,606.86 | 803.93   | V   | 1,932.99 | 967.00   | 1,915.97 | 958.49   | 1,914.98 | 957.99   | 15    |
| 16 | 1,752.92 | 876.97   | 1,735.90 | 868.45   | 1,734.91 | 867.96   | Q   | 1,833.92 | 917.47   | 1,816.90 | 908.95   | 1,815.91 | 908.46   | 14    |
| 17 | 1,867.95 | 934.48   | 1,850.93 | 925.97   | 1,849.94 | 925.47   | D   | 1,705.87 | 853.44   | 1,688.84 | 844.92   | 1,687.86 | 844.43   | 13    |
| 18 | 1,967.02 | 984.01   | 1,949.99 | 975.50   | 1,949.01 | 975.01   | V   | 1,590.84 | 795.92   | 1,573.81 | 787.41   | 1,572.83 | 786.92   | 12    |
| 19 | 2,066.09 | 1,033.55 | 2,049.06 | 1,025.03 | 2,048.08 | 1,024.54 | V   | 1,491.77 | 746.39   | 1,474.74 | 737.88   | 1,473.76 | 737.38   | 11    |
| 20 | 2,137.13 | 1,069.07 | 2,120.10 | 1,060.55 | 2,119.12 | 1,060.06 | A   | 1,392.70 | 696.85   | 1,375.68 | 688.34   | 1,374.69 | 687.85   | 10    |
| 21 | 2,250.21 | 1,125.61 | 2,233.18 | 1,117.10 | 2,232.20 | 1,116.60 | L   | 1,321.67 | 661.34   | 1,304.64 | 652.82   | 1,303.65 | 652.33   | 9     |
| 22 | 2,381.25 | 1,191.13 | 2,364.22 | 1,182.62 | 2,363.24 | 1,182.12 | M   | 1,208.58 | 604.79   | 1,191.55 | 596.28   | 1,190.57 | 595.79   | 8     |
| 23 | 2,496.28 | 1,248.64 | 2,479.25 | 1,240.13 | 2,478.27 | 1,239.64 | D   | 1,077.54 | 539.27   | 1,060.51 | 530.76   | 1,059.53 | 530.27   | 7     |
| 24 | 2,597.32 | 1,299.17 | 2,580.30 | 1,290.65 | 2,579.31 | 1,290.16 | T   | 962.51   | 481.76   | 945.49   | 473.25   | 944.50   | 472.76   | 6     |

|    |          |          |          |          |          |          |   |        |        |        |        |  |  |  |   |
|----|----------|----------|----------|----------|----------|----------|---|--------|--------|--------|--------|--|--|--|---|
| 25 | 2,760.39 | 1,380.70 | 2,743.36 | 1,372.18 | 2,742.38 | 1,371.69 | Y | 861.47 | 431.24 | 844.44 | 422.72 |  |  |  | 5 |
| 26 | 2,923.45 | 1,462.23 | 2,906.42 | 1,453.72 | 2,905.44 | 1,453.22 | Y | 698.40 | 349.70 | 681.38 | 341.19 |  |  |  | 4 |
| 27 | 3,036.54 | 1,518.77 | 3,019.51 | 1,510.26 | 3,018.52 | 1,509.77 | L | 535.34 | 268.17 | 518.31 | 259.66 |  |  |  | 3 |
| 28 | 3,167.58 | 1,584.29 | 3,150.55 | 1,575.78 | 3,149.57 | 1,575.29 | M | 422.26 | 211.63 | 405.23 | 203.12 |  |  |  | 2 |
| 29 |          |          |          |          |          |          | K | 291.21 | 146.11 | 274.19 | 137.60 |  |  |  | 1 |

Query 5704 Hit 1

MS/MS Fragmentation of **NQKLSVVR**

Found in **sp|Q14CX7|NAA25\_HUMAN**, N-alpha-acetyltransferase 25

Match to Query 5704: 944.5411 from (473.2778, 2+)

Title: 144: Scan 540 (rt=20.9633, f=3, i=51) [D:\lab212\membrane\Grace\Joyce\iTRAQ\_24\_1.raw]

Data File: Submitted from 20120508-1(merge) by Mascot Daemon on JOYCE-VAIO

Monoisotopic mass of neutral peptide Mr(calc): 944.5411

Variable modifications:

N1 :Deamidated (NQ)

Q2 :Deamidated (NQ)

Ions Score: 41.08 Expect: 0.055

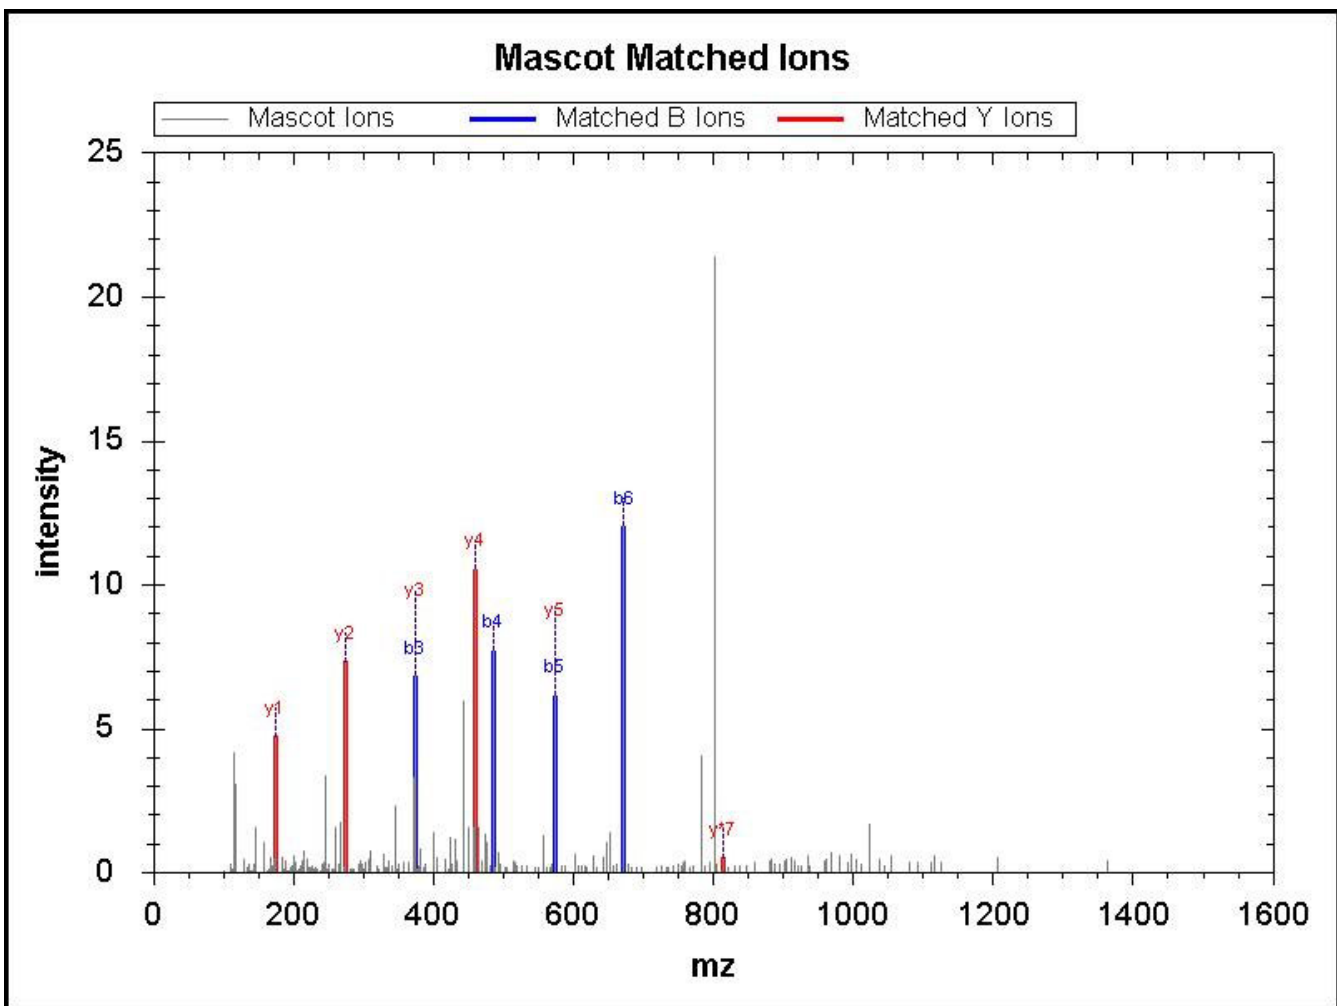

| No | b      | b++    | b*     | b*++   | b0     | b0++   | Seq | y      | y++    | y*     | y*++   | y0     | y0++   | RevNo |
|----|--------|--------|--------|--------|--------|--------|-----|--------|--------|--------|--------|--------|--------|-------|
| 1  | 116.03 | 58.52  | 99.01  | 50.01  |        |        | N   |        |        |        |        |        |        | 8     |
| 2  | 245.08 | 123.04 | 228.05 | 114.53 |        |        | Q   | 830.51 | 415.76 | 813.48 | 407.25 | 812.50 | 406.75 | 7     |
| 3  | 373.17 | 187.09 | 356.15 | 178.58 |        |        | K   | 701.47 | 351.24 | 684.44 | 342.72 | 683.46 | 342.23 | 6     |
| 4  | 486.26 | 243.63 | 469.23 | 235.12 |        |        | L   | 573.37 | 287.19 | 556.35 | 278.68 | 555.36 | 278.18 | 5     |
| 5  | 573.29 | 287.15 | 556.26 | 278.63 | 555.28 | 278.14 | S   | 460.29 | 230.65 | 443.26 | 222.13 | 442.28 | 221.64 | 4     |
| 6  | 672.36 | 336.68 | 655.33 | 328.17 | 654.35 | 327.68 | V   | 373.26 | 187.13 | 356.23 | 178.62 |        |        | 3     |
| 7  | 771.42 | 386.22 | 754.40 | 377.70 | 753.41 | 377.21 | V   | 274.19 | 137.60 | 257.16 | 129.08 |        |        | 2     |
| 8  |        |        |        |        |        |        | R   | 175.12 | 88.06  | 158.09 | 79.55  |        |        | 1     |

Query 7197 Hit 1

MS/MS Fragmentation of **AQDEVQR**

Found in **sp|Q8NCX0|CC150\_HUMAN**, Coiled-coil domain-containing protein 150 OS=Homo sapiens GN=CCDC150 PE=2 SV=2

Match to Query 7197: 989.4898 from (495.7522, 2+)

Title: 6: Scan 111 (rt=11.9608, f=2, i=5) [D:\lab212\membrane\Grace\Joyce\iTRAQ\_28\_2\_327.raw]

Data File: Submitted from 20120508-1(merge) by Mascot Daemon on JOYCE-VAIO

Monoisotopic mass of neutral peptide Mr(calc): 989.4898

Variable modifications:

Q2 :Deamidated (NQ)

Ions Score: 41.08 Expect: 0.056

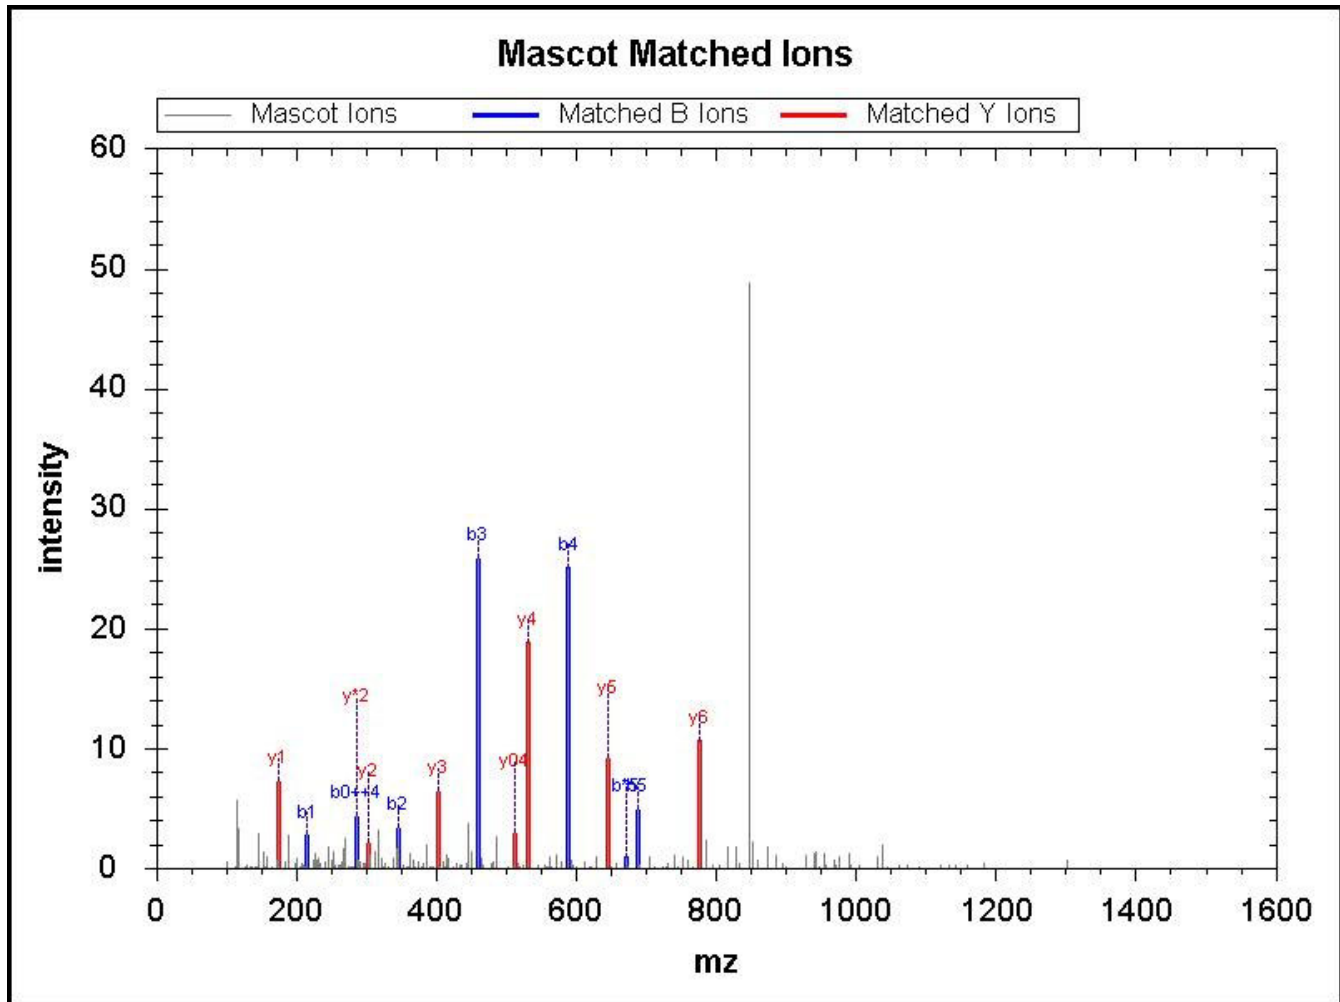

| No | b      | b++    | b*     | b*++   | b0     | b0++   | Seq | y      | y++    | y*     | y*++   | y0     | y0++   | RevNo |
|----|--------|--------|--------|--------|--------|--------|-----|--------|--------|--------|--------|--------|--------|-------|
| 1  | 216.15 | 108.58 |        |        |        |        | A   |        |        |        |        |        |        | 7     |
| 2  | 345.19 | 173.10 | 328.16 | 164.58 |        |        | Q   | 775.36 | 388.18 | 758.33 | 379.67 | 757.35 | 379.18 | 6     |
| 3  | 460.22 | 230.61 | 443.19 | 222.10 | 442.21 | 221.61 | D   | 646.32 | 323.66 | 629.29 | 315.15 | 628.30 | 314.66 | 5     |
| 4  | 589.26 | 295.13 | 572.23 | 286.62 | 571.25 | 286.13 | E   | 531.29 | 266.15 | 514.26 | 257.63 | 513.28 | 257.14 | 4     |
| 5  | 688.33 | 344.67 | 671.30 | 336.15 | 670.32 | 335.66 | V   | 402.25 | 201.63 | 385.22 | 193.11 |        |        | 3     |
| 6  | 816.39 | 408.70 | 799.36 | 400.18 | 798.38 | 399.69 | Q   | 303.18 | 152.09 | 286.15 | 143.58 |        |        | 2     |
| 7  |        |        |        |        |        |        | R   | 175.12 | 88.06  | 158.09 | 79.55  |        |        | 1     |

Query 28994 Hit 1

MS/MS Fragmentation of **KYFQGLLNR**

Found in **sp|P31532|SAA4\_MOUSE**, Serum amyloid A-4 protein OS=Mus musculus GN=Saa4 PE=1 SV=2

Match to Query 28994: 1425.837 from (476.2862, 3+)

Title: 534: Sum of 2 scans in range 1196 (rt=36.6175, f=4, i=360) to 1197 (rt=36.6429, f=4, i=361)

[D:\lab212\membrane\Grace\Joyce\iTRAQ\_47\_1.raw]

Data File: Submitted from 20120508-1(merge) by Mascot Daemon on JOYCE-VAIO

Monoisotopic mass of neutral peptide Mr(calc): 1425.837

Variable modifications:  
 K1 :iTRAQ4plex (K)  
 Ions Score: 40.96 Expect: 0.041

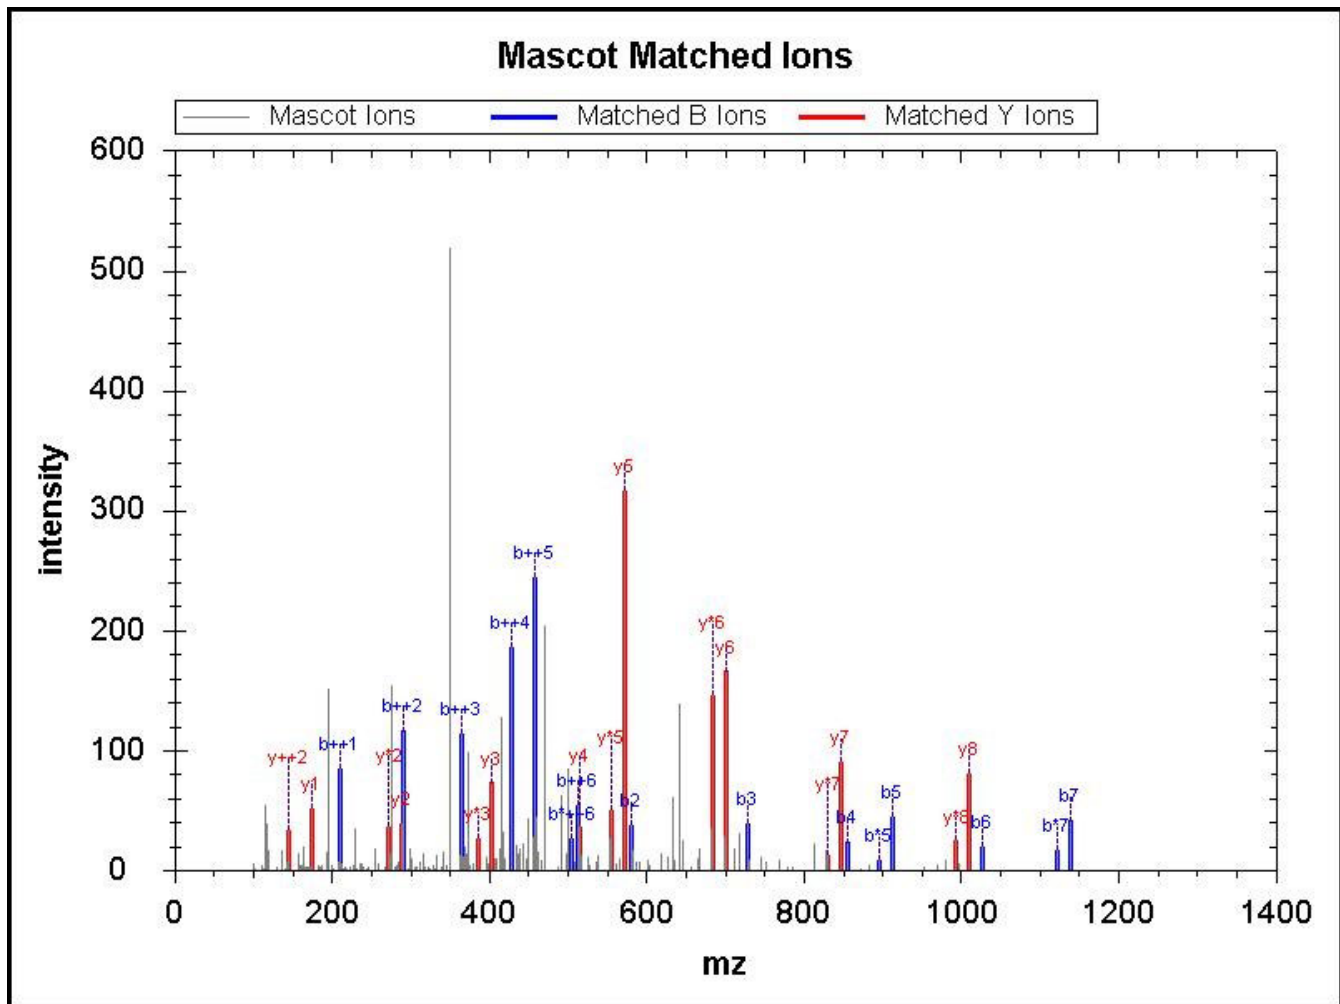

| No | b        | b++    | b*       | b*++   | Seq | y        | y++    | y*     | y*++   | RevNo |
|----|----------|--------|----------|--------|-----|----------|--------|--------|--------|-------|
| 1  | 417.31   | 209.16 | 400.28   | 200.64 | K   |          |        |        |        | 9     |
| 2  | 580.37   | 290.69 | 563.34   | 282.18 | Y   | 1,010.54 | 505.77 | 993.52 | 497.26 | 8     |
| 3  | 727.44   | 364.22 | 710.41   | 355.71 | F   | 847.48   | 424.24 | 830.45 | 415.73 | 7     |
| 4  | 855.50   | 428.25 | 838.47   | 419.74 | Q   | 700.41   | 350.71 | 683.38 | 342.20 | 6     |
| 5  | 912.52   | 456.76 | 895.49   | 448.25 | G   | 572.35   | 286.68 | 555.32 | 278.17 | 5     |
| 6  | 1,025.60 | 513.30 | 1,008.58 | 504.79 | L   | 515.33   | 258.17 | 498.30 | 249.66 | 4     |
| 7  | 1,138.69 | 569.85 | 1,121.66 | 561.33 | L   | 402.25   | 201.63 | 385.22 | 193.11 | 3     |
| 8  | 1,252.73 | 626.87 | 1,235.70 | 618.36 | N   | 289.16   | 145.08 | 272.14 | 136.57 | 2     |
| 9  |          |        |          |        | R   | 175.12   | 88.06  | 158.09 | 79.55  | 1     |

Query 10271 Hit 1

MS/MS Fragmentation of **LWSFTK**

Found in **sp|Q8IUI8|CRLF3\_HUMAN**, Cytokine receptor-like factor 3 OS=Homo sapiens GN=CRLF3 PE=1 SV=2

Match to Query 10271: 1068.622from(535.3185,2+)

Title: 645: Scan 1429 (rt=41.8578, f=2, i=232) [D:\lab212\membrane\Grace\Joyce\iTRAQ\_33\_2.raw]

Data File:Submitted from 20120508-1(merge) by Mascot Daemon on JOYCE-VAIO

Monoisotopic mass of neutral peptide Mr(calc): 1068.622

Variable modifications:

K6 :iTRAQ4plex (K)

Ions Score: 40.92 Expect: 0.039

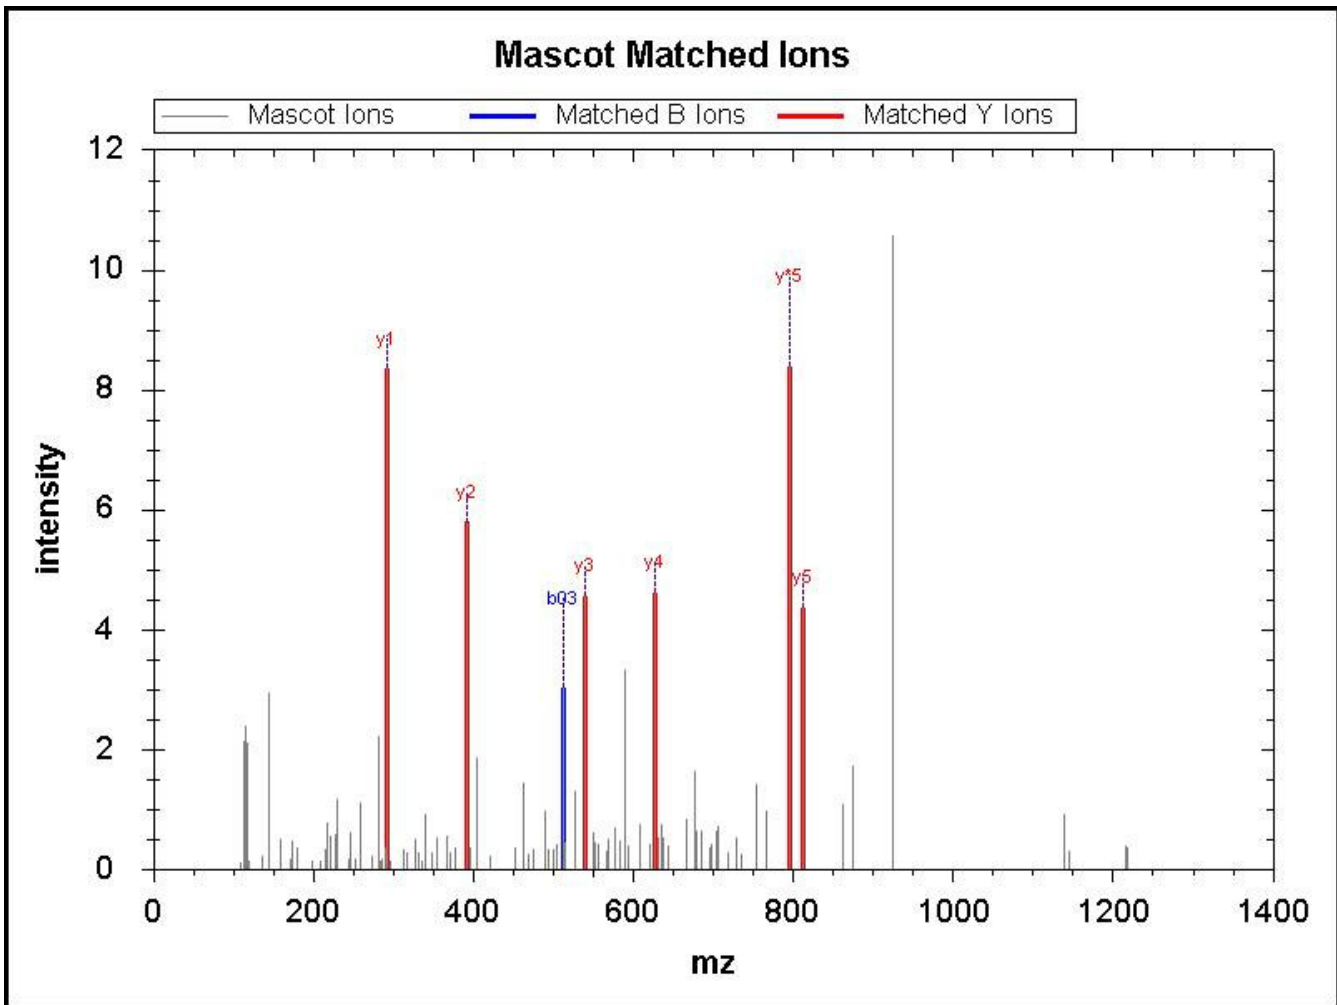

| No | b      | b++    | b0     | b0++   | Seq | y      | y++    | y*     | y*++   | y0     | y0++   | RevNo |
|----|--------|--------|--------|--------|-----|--------|--------|--------|--------|--------|--------|-------|
| 1  | 258.19 | 129.60 |        |        | L   |        |        |        |        |        |        | 6     |
| 2  | 444.27 | 222.64 |        |        | W   | 812.44 | 406.72 | 795.42 | 398.21 | 794.43 | 397.72 | 5     |
| 3  | 531.30 | 266.16 | 513.29 | 257.15 | S   | 626.36 | 313.69 | 609.34 | 305.17 | 608.35 | 304.68 | 4     |
| 4  | 678.37 | 339.69 | 660.36 | 330.68 | F   | 539.33 | 270.17 | 522.30 | 261.66 | 521.32 | 261.16 | 3     |
| 5  | 779.42 | 390.21 | 761.41 | 381.21 | T   | 392.26 | 196.63 | 375.24 | 188.12 | 374.25 | 187.63 | 2     |
| 6  |        |        |        |        | K   | 291.21 | 146.11 | 274.19 | 137.60 |        |        | 1     |

Query 56867 Hit 1

MS/MS Fragmentation of **TASPLEHILQTLFGK**

Found in **sp|Q9BTC0|DIDO1\_HUMAN**, Death-inducer obliterator 1 OS=Homo sapiens GN=DIDO1 PE=1 SV=5

Match to Query 56867: 1942.115from(648.3792,3+)

Title: 1291: Scan 2918 (rt=74.9128, f=2, i=493) [D:\lab212\membrane\Grace\Joyce\iTRAQ\_39\_1.raw]

Data File: Submitted from 20120508-1(merge) by Mascot Daemon on JOYCE-VAIO

Monoisotopic mass of neutral peptide Mr(calc): 1942.115

Variable modifications:

K15 iTRAQ4plex (K)

Ions Score: 40.91 Expect: 0.041



### Mascot Matched Ions

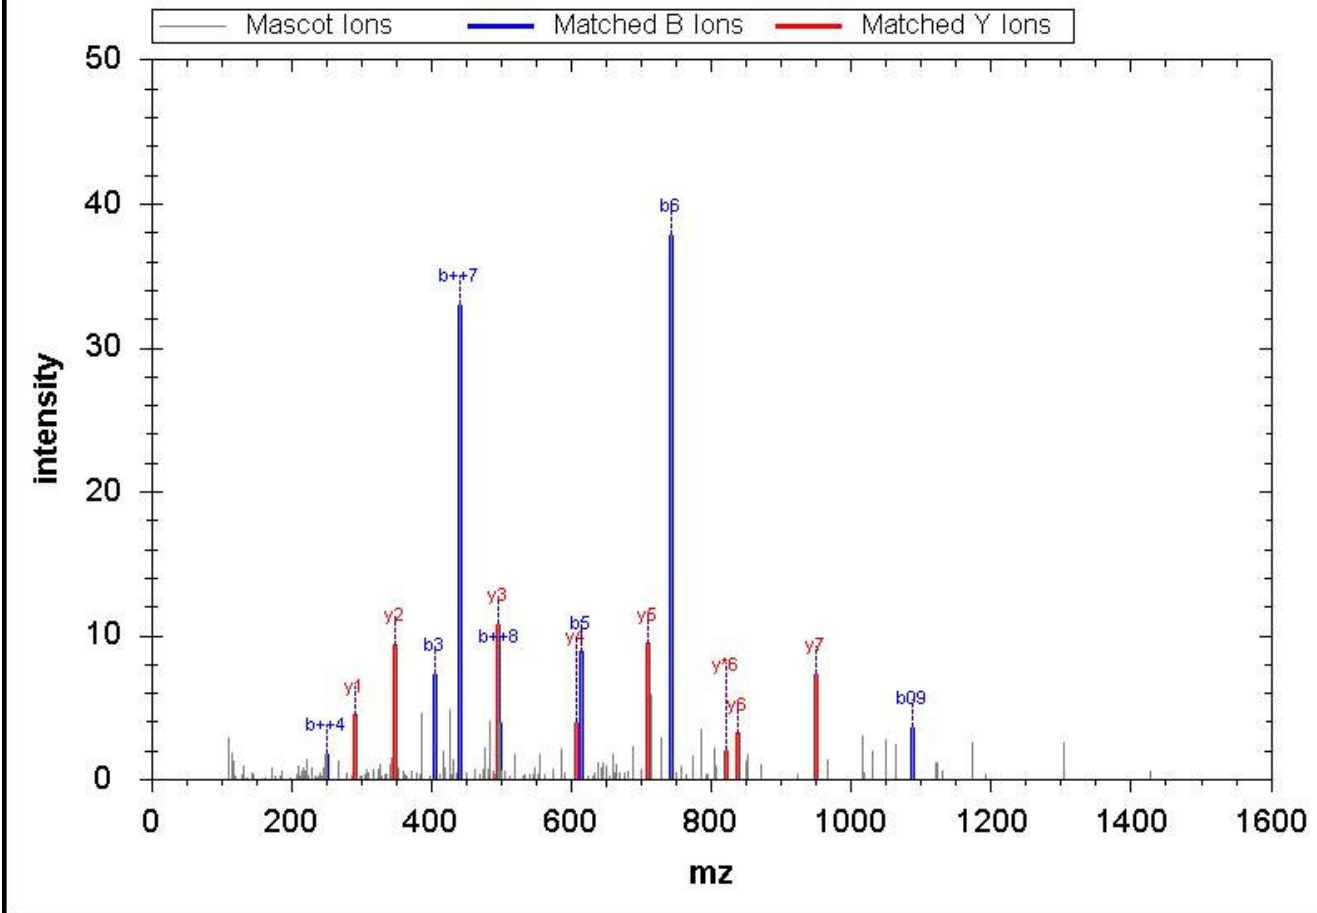

| No | b        | b++    | b*       | b*++   | b0       | b0++   | Seq | y        | y++    | y*       | y*++   | y0       | y0++   | RevNo |
|----|----------|--------|----------|--------|----------|--------|-----|----------|--------|----------|--------|----------|--------|-------|
| 1  | 246.16   | 123.58 |          |        | 228.15   | 114.58 | T   |          |        |          |        |          |        | 15    |
| 2  | 317.19   | 159.10 |          |        | 299.18   | 150.10 | A   | 1,697.97 | 849.49 | 1,680.94 | 840.98 | 1,679.96 | 840.48 | 14    |
| 3  | 404.23   | 202.62 |          |        | 386.22   | 193.61 | S   | 1,626.93 | 813.97 | 1,609.91 | 805.46 | 1,608.92 | 804.97 | 13    |
| 4  | 501.28   | 251.14 |          |        | 483.27   | 242.14 | P   | 1,539.90 | 770.45 | 1,522.88 | 761.94 | 1,521.89 | 761.45 | 12    |
| 5  | 614.36   | 307.69 |          |        | 596.35   | 298.68 | L   | 1,442.85 | 721.93 | 1,425.82 | 713.41 | 1,424.84 | 712.92 | 11    |
| 6  | 743.41   | 372.21 |          |        | 725.40   | 363.20 | E   | 1,329.76 | 665.39 | 1,312.74 | 656.87 | 1,311.75 | 656.38 | 10    |
| 7  | 880.46   | 440.74 |          |        | 862.45   | 431.73 | H   | 1,200.72 | 600.86 | 1,183.70 | 592.35 | 1,182.71 | 591.86 | 9     |
| 8  | 993.55   | 497.28 |          |        | 975.54   | 488.27 | I   | 1,063.66 | 532.34 | 1,046.64 | 523.82 | 1,045.65 | 523.33 | 8     |
| 9  | 1,106.63 | 553.82 |          |        | 1,088.62 | 544.81 | L   | 950.58   | 475.79 | 933.55   | 467.28 | 932.57   | 466.79 | 7     |
| 10 | 1,234.69 | 617.85 | 1,217.66 | 609.34 | 1,216.68 | 608.84 | Q   | 837.50   | 419.25 | 820.47   | 410.74 | 819.48   | 410.25 | 6     |
| 11 | 1,335.74 | 668.37 | 1,318.71 | 659.86 | 1,317.73 | 659.37 | T   | 709.44   | 355.22 | 692.41   | 346.71 | 691.43   | 346.22 | 5     |
| 12 | 1,448.82 | 724.92 | 1,431.80 | 716.40 | 1,430.81 | 715.91 | L   | 608.39   | 304.70 | 591.36   | 296.18 |          |        | 4     |
| 13 | 1,595.89 | 798.45 | 1,578.87 | 789.94 | 1,577.88 | 789.44 | F   | 495.30   | 248.16 | 478.28   | 239.64 |          |        | 3     |
| 14 | 1,652.91 | 826.96 | 1,635.89 | 818.45 | 1,634.90 | 817.95 | G   | 348.24   | 174.62 | 331.21   | 166.11 |          |        | 2     |
| 15 |          |        |          |        |          |        | K   | 291.21   | 146.11 | 274.19   | 137.60 |          |        | 1     |

Query 187 Hit 1

MS/MS Fragmentation of **NPNVK**

Found in **sp|Q9JM99|PRG4\_MOUSE**, Proteoglycan 4 OS=Mus musculus GN=Prg4 PE=1 SV=2  
Match to Query 187: 714.414from(358.2143,2+)

Title: 771: Sum of 2 scans in range 1747 (rt=48.7047, f=4, i=517) to 1748 (rt=48.7301, f=4, i=518)

[D:\lab212\membrane\GraceJoyce\TRAQ\_28\_1\_327.raw]

Data File: Submitted from 20120508-1(merge) by Mascot Daemon on JOYCE-VAIO

Monoisotopic mass of neutral peptide Mr(calc): 714.414

Variable modifications:

K5 iTRAQ4plex (K)  
 Ions Score: 40.9 Expect: 0.028

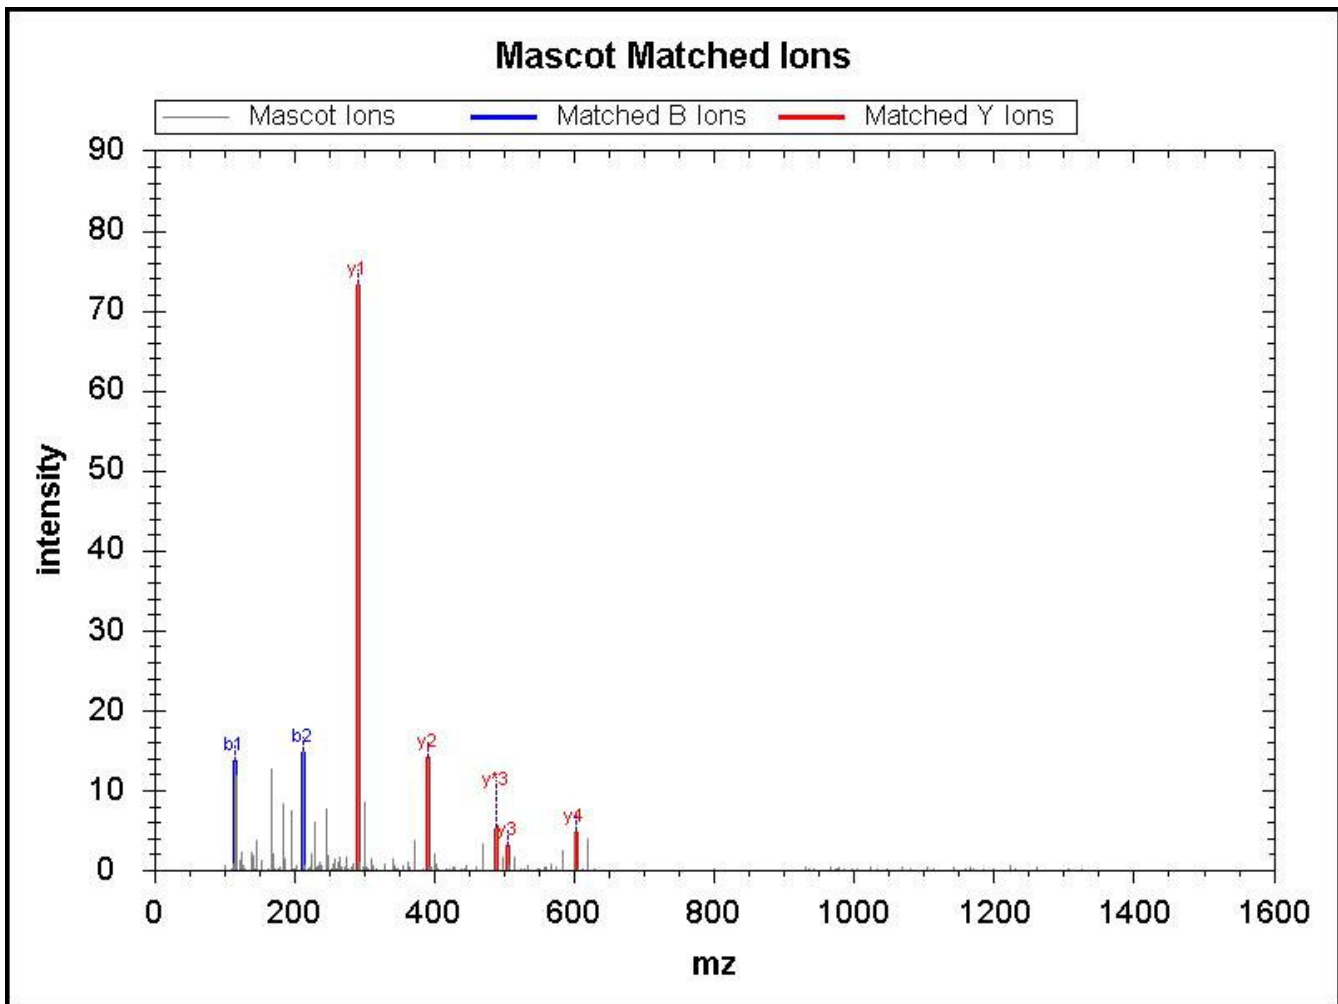

| No | b      | b++    | b*     | b*++   | Seq | y      | y++    | y*     | y*++   | RevNo |
|----|--------|--------|--------|--------|-----|--------|--------|--------|--------|-------|
| 1  | 115.05 | 58.03  | 98.02  | 49.52  | N   |        |        |        |        | 5     |
| 2  | 212.10 | 106.56 | 195.08 | 98.04  | P   | 601.38 | 301.19 | 584.35 | 292.68 | 4     |
| 3  | 326.15 | 163.58 | 309.12 | 155.06 | N   | 504.33 | 252.67 | 487.30 | 244.15 | 3     |
| 4  | 425.21 | 213.11 | 408.19 | 204.60 | V   | 390.28 | 195.65 | 373.26 | 187.13 | 2     |
| 5  |        |        |        |        | K   | 291.21 | 146.11 | 274.19 | 137.60 | 1     |

Query 13484 Hit 1

MS/MS Fragmentation of **MILDLLK**

Found in **sp|Q53EL6|PDCD4\_HUMAN**, Programmed cell death protein 4 OS=Homo sapiens GN=PDCD4 PE=1 SV=2

Match to Query 13484: 1132.714from(567.3644,2+)

Title: 853: Scan 1979 (rt=53.5277, f=3, i=286) [D:\lab212\membrane\Grace\Joyce\iTRAQ\_29\_1.raw]

Data File: Submitted from 20120508-1(merge) by Mascot Daemon on JOYCE-VAIO

Monoisotopic mass of neutral peptide Mr(calc): 1132.714

Variable modifications:

K7 iTRAQ4plex (K)

Ions Score: 40.74 Expect: 0.046

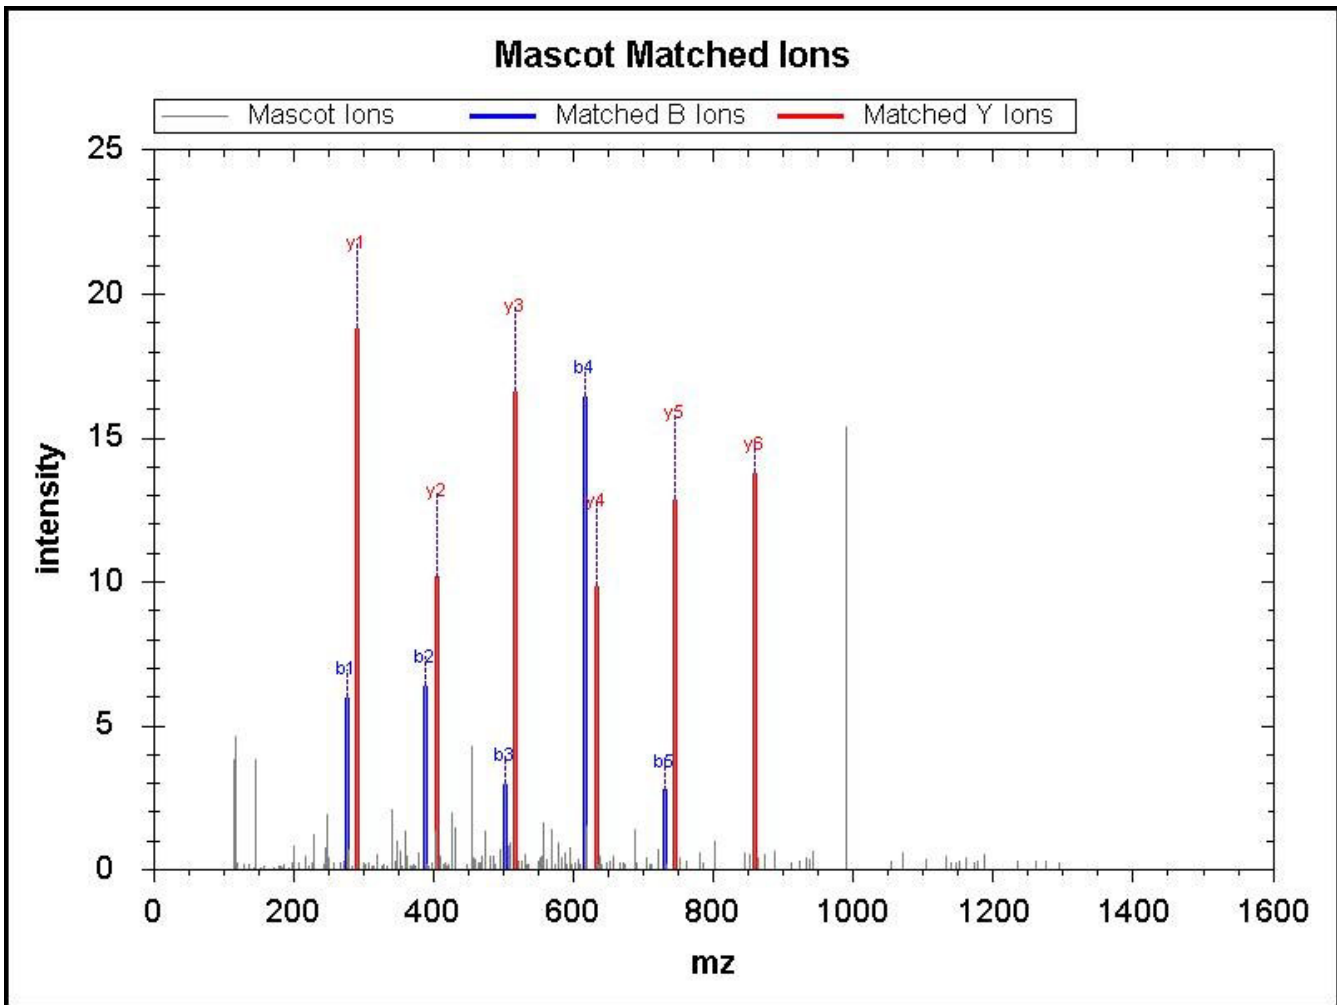

| No | b      | b++    | b0     | b0++   | Seq | y      | y++    | y*     | y*++   | y0     | y0++   | RevNo |
|----|--------|--------|--------|--------|-----|--------|--------|--------|--------|--------|--------|-------|
| 1  | 276.15 | 138.58 |        |        | M   |        |        |        |        |        |        | 7     |
| 2  | 389.23 | 195.12 |        |        | I   | 858.58 | 429.79 | 841.55 | 421.28 | 840.57 | 420.79 | 6     |
| 3  | 502.32 | 251.66 |        |        | L   | 745.49 | 373.25 | 728.47 | 364.74 | 727.48 | 364.25 | 5     |
| 4  | 617.34 | 309.18 | 599.33 | 300.17 | D   | 632.41 | 316.71 | 615.38 | 308.20 | 614.40 | 307.70 | 4     |
| 5  | 730.43 | 365.72 | 712.42 | 356.71 | L   | 517.38 | 259.20 | 500.36 | 250.68 |        |        | 3     |
| 6  | 843.51 | 422.26 | 825.50 | 413.25 | L   | 404.30 | 202.65 | 387.27 | 194.14 |        |        | 2     |
| 7  |        |        |        |        | K   | 291.21 | 146.11 | 274.19 | 137.60 |        |        | 1     |

Query 16707 Hit 1

MS/MS Fragmentation of **IWGELYK**

Found in **sp|Q13823|NOG2\_HUMAN**, Nucleolar GTP-binding protein 2 OS=Homo sapiens GN=GNL2 PE=1 SV=1

Match to Query 16707: 1195.684from(598.8491,2+)

Title: 633: Scan 1435 (rt=41.7938, f=2, i=223) [D:\lab212\membrane\Grace\Joyce\iTRAQ\_32\_1.raw]

Data File: Submitted from 20120508-1(merge) by Mascot Daemon on JOYCE-VAIO

Monoisotopic mass of neutral peptide Mr(calc): 1195.684

Variable modifications:

K7 :iTRAQ4plex (K)

Ions Score: 40.45 Expect: 0.056

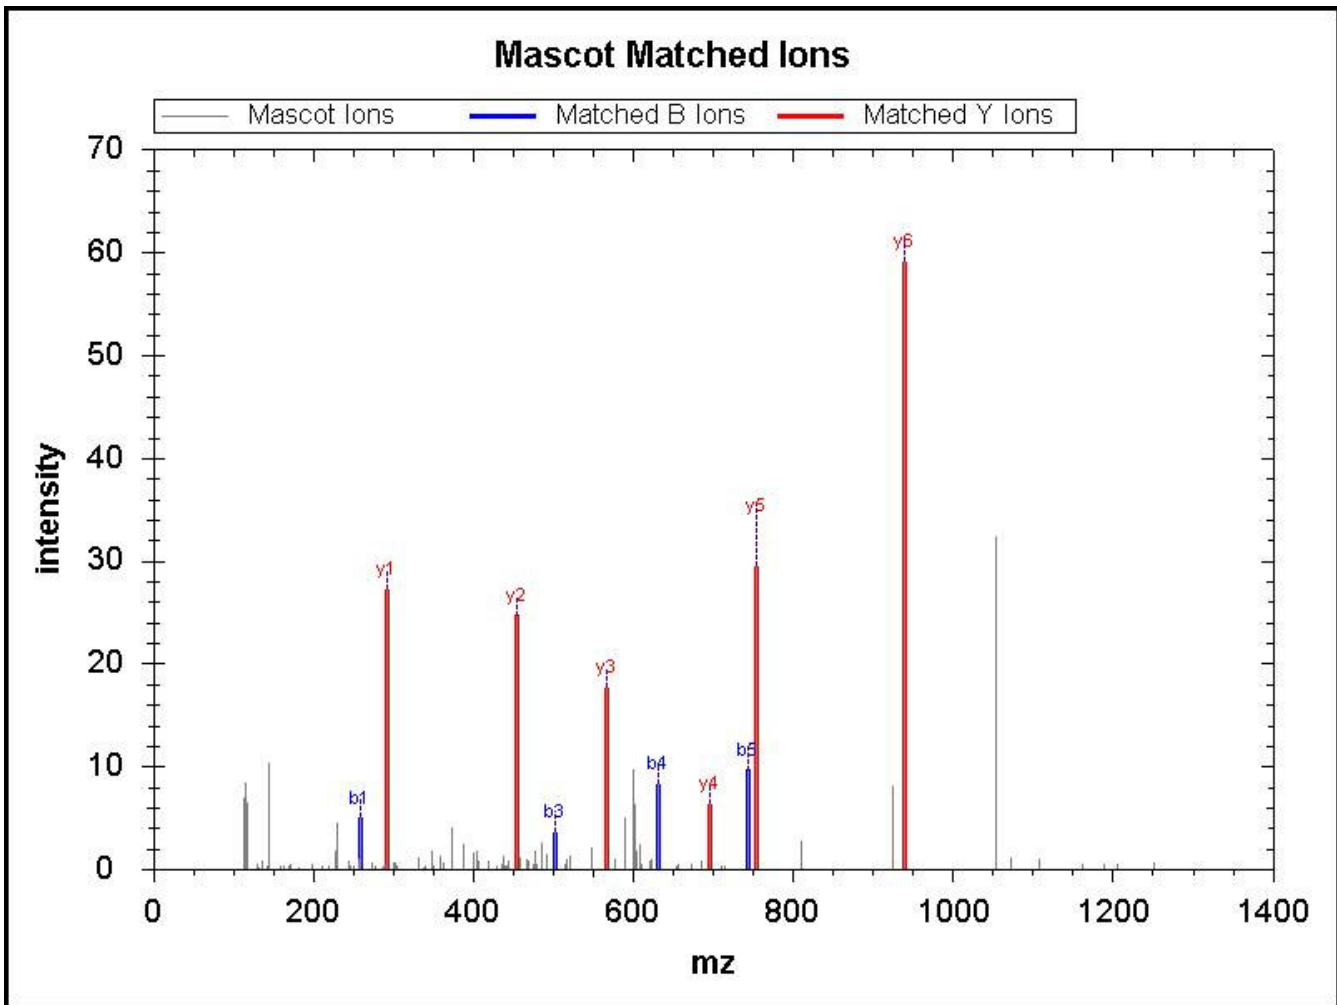

| No | b      | b++    | b0     | b0++   | Seq | y      | y++    | y*     | y*++   | y0     | y0++   | RevNo |
|----|--------|--------|--------|--------|-----|--------|--------|--------|--------|--------|--------|-------|
| 1  | 258.19 | 129.60 |        |        | I   |        |        |        |        |        |        | 7     |
| 2  | 444.27 | 222.64 |        |        | W   | 939.51 | 470.26 | 922.48 | 461.74 | 921.50 | 461.25 | 6     |
| 3  | 501.29 | 251.15 |        |        | G   | 753.43 | 377.22 | 736.40 | 368.70 | 735.42 | 368.21 | 5     |
| 4  | 630.34 | 315.67 | 612.33 | 306.67 | E   | 696.40 | 348.71 | 679.38 | 340.19 | 678.39 | 339.70 | 4     |
| 5  | 743.42 | 372.21 | 725.41 | 363.21 | L   | 567.36 | 284.18 | 550.34 | 275.67 |        |        | 3     |
| 6  | 906.48 | 453.75 | 888.47 | 444.74 | Y   | 454.28 | 227.64 | 437.25 | 219.13 |        |        | 2     |
| 7  |        |        |        |        | K   | 291.21 | 146.11 | 274.19 | 137.60 |        |        | 1     |

Query 21717 Hit 1

MS/MS Fragmentation of **EKQNEIIK**

Found in **sp|Q4G0S7|CC152\_HUMAN**, Coiled-coil domain-containing protein 152 OS=Homo sapiens GN=CCDC152 PE=2 SV=3

Match to Query 21717: 1289.833from(430.9518,3+)

Title: 351: Scan 916 (rt=29.8297, f=2, i=142) [D:\lab212\membrane\Grace\Joyce\iTRAQ\_48\_2.raw]

Data File: Submitted from 20120508-1(merge) by Mascot Daemon on JOYCE-VAIO

Monoisotopic mass of neutral peptide Mr(calc): 1289.833

Variable modifications:

N4 :Deamidated (NQ)

K8 :iTRAQ4plex (K)

Ions Score: 40.38 Expect: 0.031

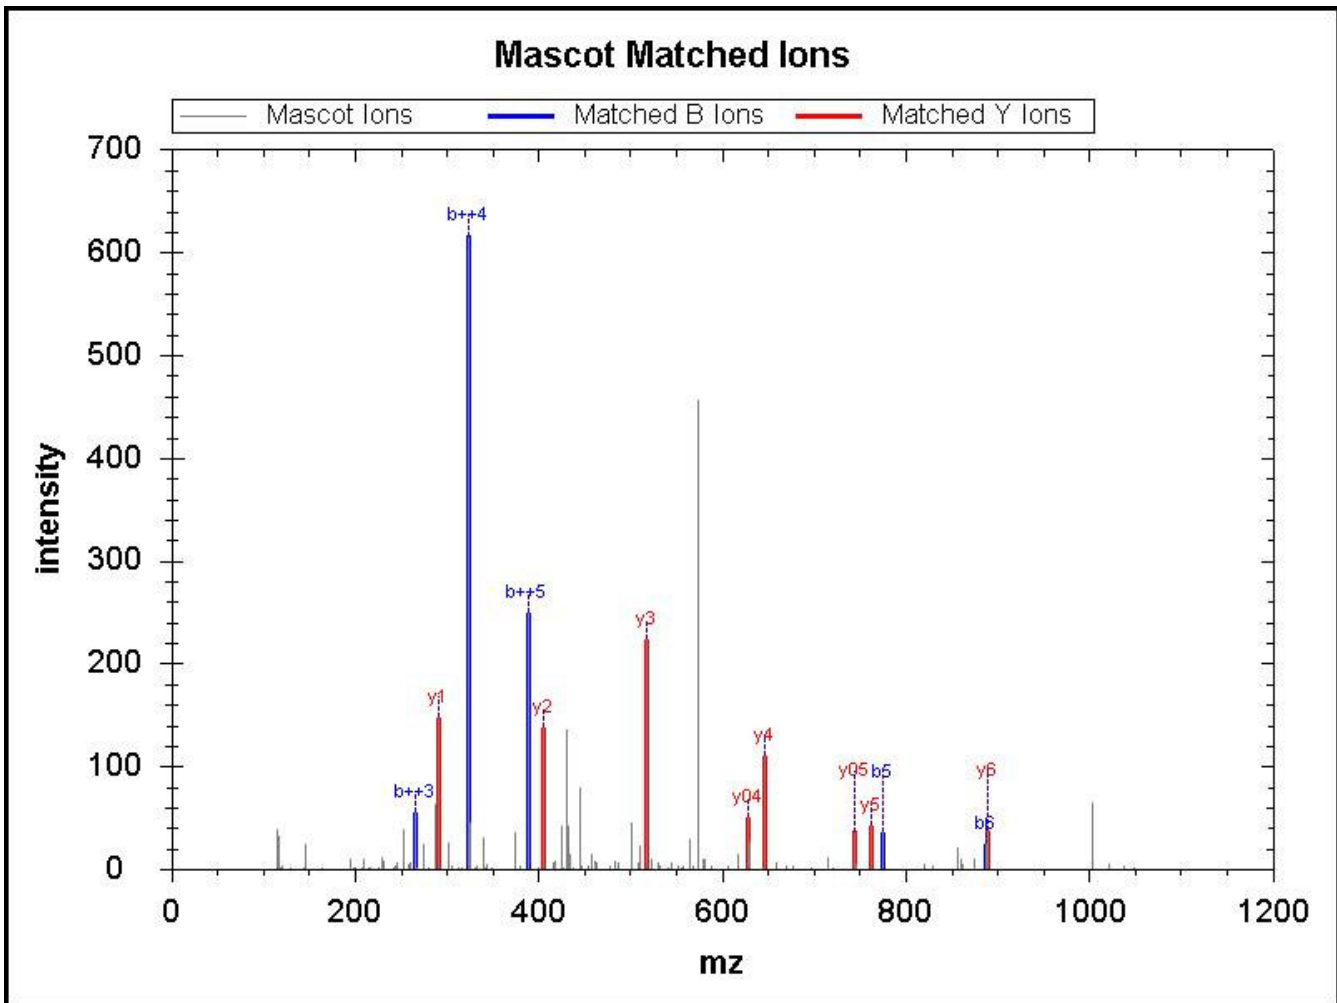

| No | b        | b++    | b*     | b*++   | b0     | b0++   | Seq | y        | y++    | y*       | y*++   | y0     | y0++   | RevNo |
|----|----------|--------|--------|--------|--------|--------|-----|----------|--------|----------|--------|--------|--------|-------|
| 1  | 274.15   | 137.58 |        |        | 256.14 | 128.57 | E   |          |        |          |        |        |        | 8     |
| 2  | 402.25   | 201.63 | 385.22 | 193.11 | 384.24 | 192.62 | K   | 1,017.61 | 509.31 | 1,000.58 | 500.79 | 999.60 | 500.30 | 7     |
| 3  | 530.31   | 265.66 | 513.28 | 257.14 | 512.29 | 256.65 | Q   | 889.51   | 445.26 | 872.48   | 436.75 | 871.50 | 436.25 | 6     |
| 4  | 645.33   | 323.17 | 628.31 | 314.66 | 627.32 | 314.16 | N   | 761.45   | 381.23 | 744.43   | 372.72 | 743.44 | 372.22 | 5     |
| 5  | 774.38   | 387.69 | 757.35 | 379.18 | 756.36 | 378.69 | E   | 646.43   | 323.72 | 629.40   | 315.20 | 628.41 | 314.71 | 4     |
| 6  | 887.46   | 444.23 | 870.43 | 435.72 | 869.45 | 435.23 | I   | 517.38   | 259.20 | 500.36   | 250.68 |        |        | 3     |
| 7  | 1,000.54 | 500.78 | 983.52 | 492.26 | 982.53 | 491.77 | I   | 404.30   | 202.65 | 387.27   | 194.14 |        |        | 2     |
| 8  |          |        |        |        |        |        | K   | 291.21   | 146.11 | 274.19   | 137.60 |        |        | 1     |

Query 9783 Hit 1

MS/MS Fragmentation of **AALGQLEEAR**

Found in **sp|Q6P566|LIX1\_MOUSE**, Protein limb expression 1 homolog OS=Mus musculus GN=Lix1 PE=2 SV=1

Match to Query 9783: 1057.63from(529.822,2+)

Title: 325: Scan 1407 (rt=37.9333, f=3, i=101) [D:\lab212\membrane\Grace\Joyce\iTRAQ\_24\_2.raw]

Data File: Submitted from 20120508-1(merge) by Mascot Daemon on JOYCE-VAIO

Monoisotopic mass of neutral peptide Mr(calc): 1057.63

Variable modifications:

Q5 :Deamidated (NQ)

Ions Score: 40.34 Expect: 0.051

### Mascot Matched Ions

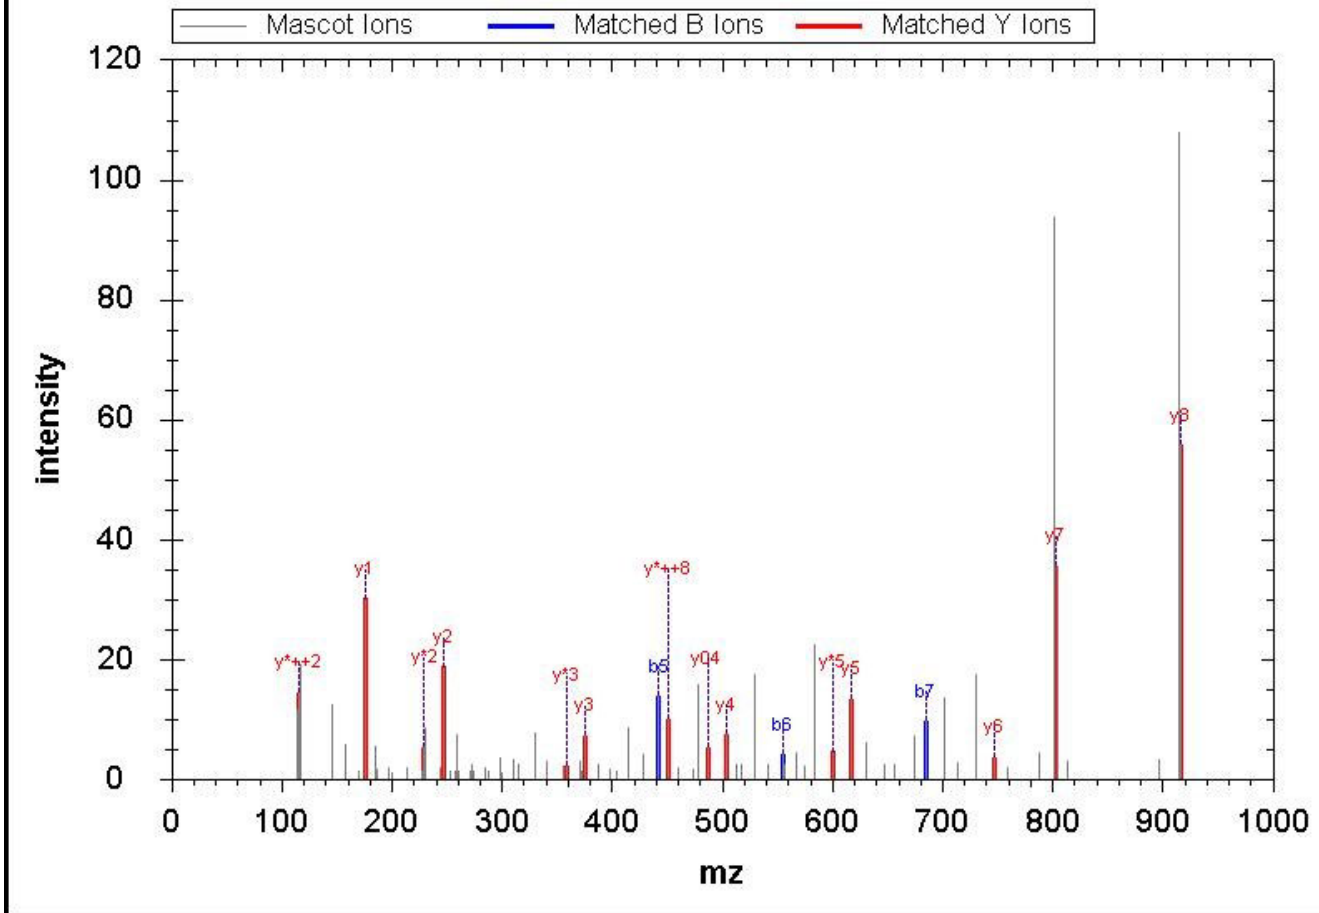

| No | b      | b++    | b*     | b*++   | b0     | b0++   | Seq | y      | y++    | y*     | y*++   | y0     | y0++   | RevNo |
|----|--------|--------|--------|--------|--------|--------|-----|--------|--------|--------|--------|--------|--------|-------|
| 1  | 72.04  | 36.53  |        |        |        |        | A   |        |        |        |        |        |        | 10    |
| 2  | 143.08 | 72.04  |        |        |        |        | A   | 987.51 | 494.26 | 970.48 | 485.75 | 969.50 | 485.25 | 9     |
| 3  | 256.17 | 128.59 |        |        |        |        | L   | 916.47 | 458.74 | 899.45 | 450.23 | 898.46 | 449.74 | 8     |
| 4  | 313.19 | 157.10 |        |        |        |        | G   | 803.39 | 402.20 | 786.36 | 393.69 | 785.38 | 393.19 | 7     |
| 5  | 442.23 | 221.62 | 425.20 | 213.11 |        |        | Q   | 746.37 | 373.69 | 729.34 | 365.17 | 728.36 | 364.68 | 6     |
| 6  | 555.31 | 278.16 | 538.29 | 269.65 |        |        | L   | 617.33 | 309.17 | 600.30 | 300.65 | 599.31 | 300.16 | 5     |
| 7  | 684.36 | 342.68 | 667.33 | 334.17 | 666.35 | 333.68 | E   | 504.24 | 252.62 | 487.21 | 244.11 | 486.23 | 243.62 | 4     |
| 8  | 813.40 | 407.20 | 796.37 | 398.69 | 795.39 | 398.20 | E   | 375.20 | 188.10 | 358.17 | 179.59 | 357.19 | 179.10 | 3     |
| 9  | 884.44 | 442.72 | 867.41 | 434.21 | 866.43 | 433.72 | A   | 246.16 | 123.58 | 229.13 | 115.07 |        |        | 2     |
| 10 |        |        |        |        |        |        | R   | 175.12 | 88.06  | 158.09 | 79.55  |        |        | 1     |

Query 65183 Hit 1

MS/MS Fragmentation of **YHWLVLPWTSISSLK**

Found in **sp|Q7Z2E3|APTX\_HUMAN**, Aprataxin OS=Homo sapiens GN=APTX PE=1 SV=2

Match to Query 65183: 2117.196from(706.7392,3+)

Title: 1099: Scan 2395 (rt=63.5558, f=2, i=390) [D:\lab212\membrane\Grace\Joyce\iTRAQ\_39\_2.raw]

Data File: Submitted from 20120508-1(merge) by Mascot Daemon on JOYCE-VAIO

Monoisotopic mass of neutral peptide Mr(calc): 2117.196

Variable modifications:

K15 iTRAQ4plex (K)

Ions Score: 40.33 Expect: 0.051

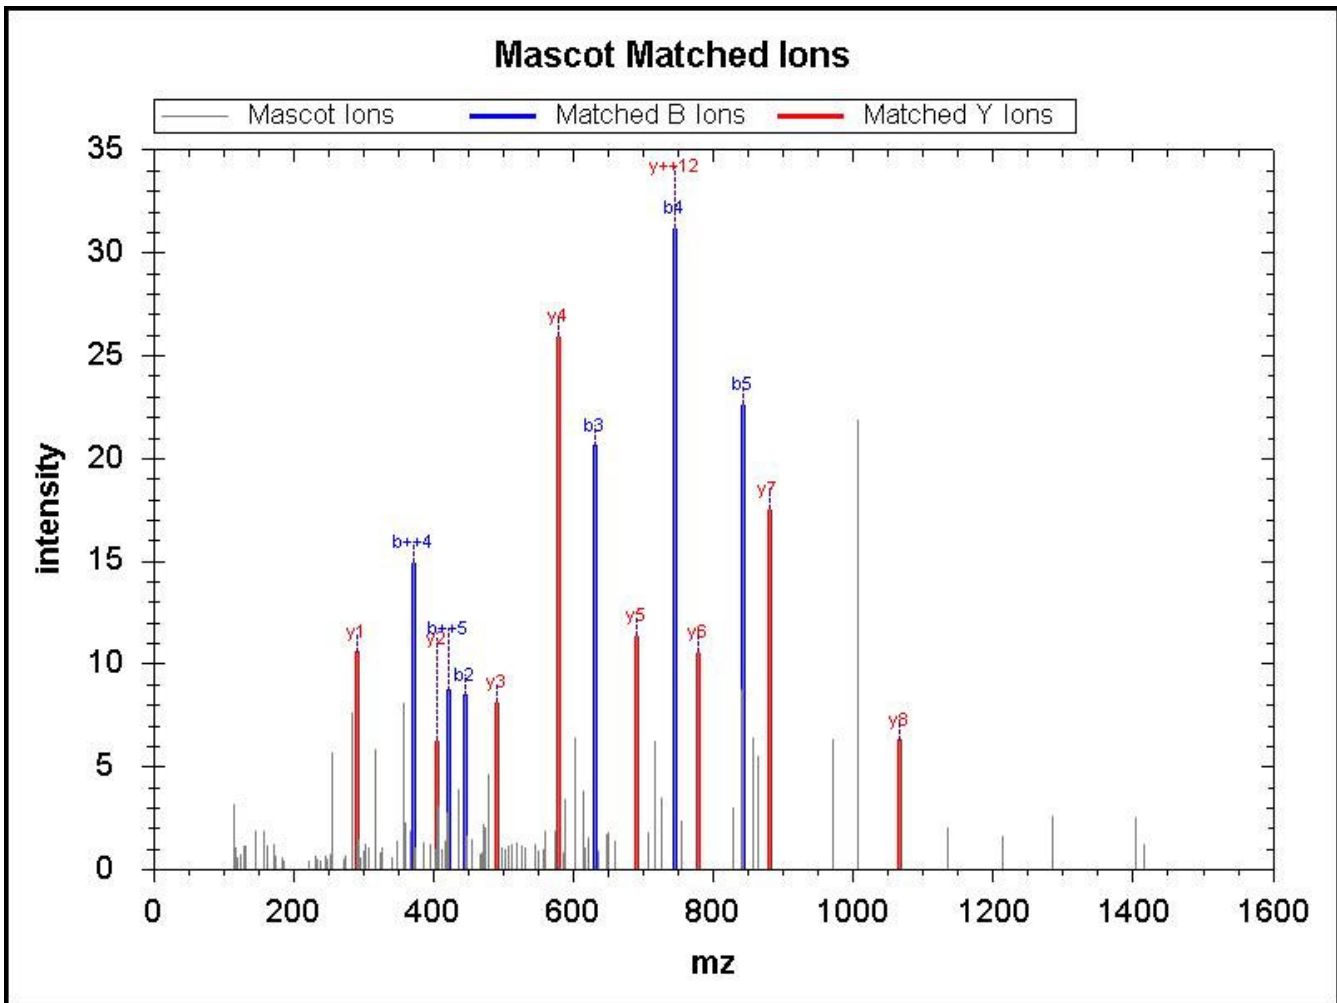

| No | b        | b++    | b0       | b0++   | Seq | y        | y++    | y*       | y*++   | y0       | y0++   | RevNo |
|----|----------|--------|----------|--------|-----|----------|--------|----------|--------|----------|--------|-------|
| 1  | 308.17   | 154.59 |          |        | Y   |          |        |          |        |          |        | 15    |
| 2  | 445.23   | 223.12 |          |        | H   | 1,811.03 | 906.02 | 1,794.01 | 897.51 | 1,793.02 | 897.02 | 14    |
| 3  | 631.31   | 316.16 |          |        | W   | 1,673.97 | 837.49 | 1,656.95 | 828.98 | 1,655.96 | 828.49 | 13    |
| 4  | 744.39   | 372.70 |          |        | L   | 1,487.90 | 744.45 | 1,470.87 | 735.94 | 1,469.88 | 735.45 | 12    |
| 5  | 843.46   | 422.24 |          |        | V   | 1,374.81 | 687.91 | 1,357.78 | 679.40 | 1,356.80 | 678.90 | 11    |
| 6  | 956.55   | 478.78 |          |        | L   | 1,275.74 | 638.38 | 1,258.72 | 629.86 | 1,257.73 | 629.37 | 10    |
| 7  | 1,053.60 | 527.30 |          |        | P   | 1,162.66 | 581.83 | 1,145.63 | 573.32 | 1,144.65 | 572.83 | 9     |
| 8  | 1,239.68 | 620.34 |          |        | W   | 1,065.61 | 533.31 | 1,048.58 | 524.79 | 1,047.60 | 524.30 | 8     |
| 9  | 1,340.73 | 670.87 | 1,322.72 | 661.86 | T   | 879.53   | 440.27 | 862.50   | 431.75 | 861.52   | 431.26 | 7     |
| 10 | 1,427.76 | 714.38 | 1,409.75 | 705.38 | S   | 778.48   | 389.74 | 761.45   | 381.23 | 760.47   | 380.74 | 6     |
| 11 | 1,540.84 | 770.93 | 1,522.83 | 761.92 | I   | 691.45   | 346.23 | 674.42   | 337.71 | 673.44   | 337.22 | 5     |
| 12 | 1,627.88 | 814.44 | 1,609.86 | 805.44 | S   | 578.36   | 289.69 | 561.34   | 281.17 | 560.35   | 280.68 | 4     |
| 13 | 1,714.91 | 857.96 | 1,696.90 | 848.95 | S   | 491.33   | 246.17 | 474.30   | 237.66 | 473.32   | 237.16 | 3     |
| 14 | 1,827.99 | 914.50 | 1,809.98 | 905.49 | L   | 404.30   | 202.65 | 387.27   | 194.14 |          |        | 2     |
| 15 |          |        |          |        | K   | 291.21   | 146.11 | 274.19   | 137.60 |          |        | 1     |

Query 33310 Hit 1

MS/MS Fragmentation of **YLEKPITMLL**

Found in **sp|P10515|ODP2\_HUMAN**, Dihydropyridyllysine-residue acetyltransferase component of pyruvate dehydrogenase complex

Match to Query 33310: 1507.887from(754.9506,2+)

Title: 945: Sum of 2 scans in range 2082 (rt=56.5528, f=4, i=641) to 2083 (rt=56.5782, f=4, i=642)

[D:\lab212\membrane\GraceJoyce\iTRAQ\_27\_2\_327.raw]

Data File: Submitted from 20120508-1(merge) by Mascot Daemon on JOYCE-VAIO

Monoisotopic mass of neutral peptide Mr(calc): 1507.887

Variable modifications:

K4 iTRAQ4plex (K)  
 Ions Score: 40.25 Expect: 0.053

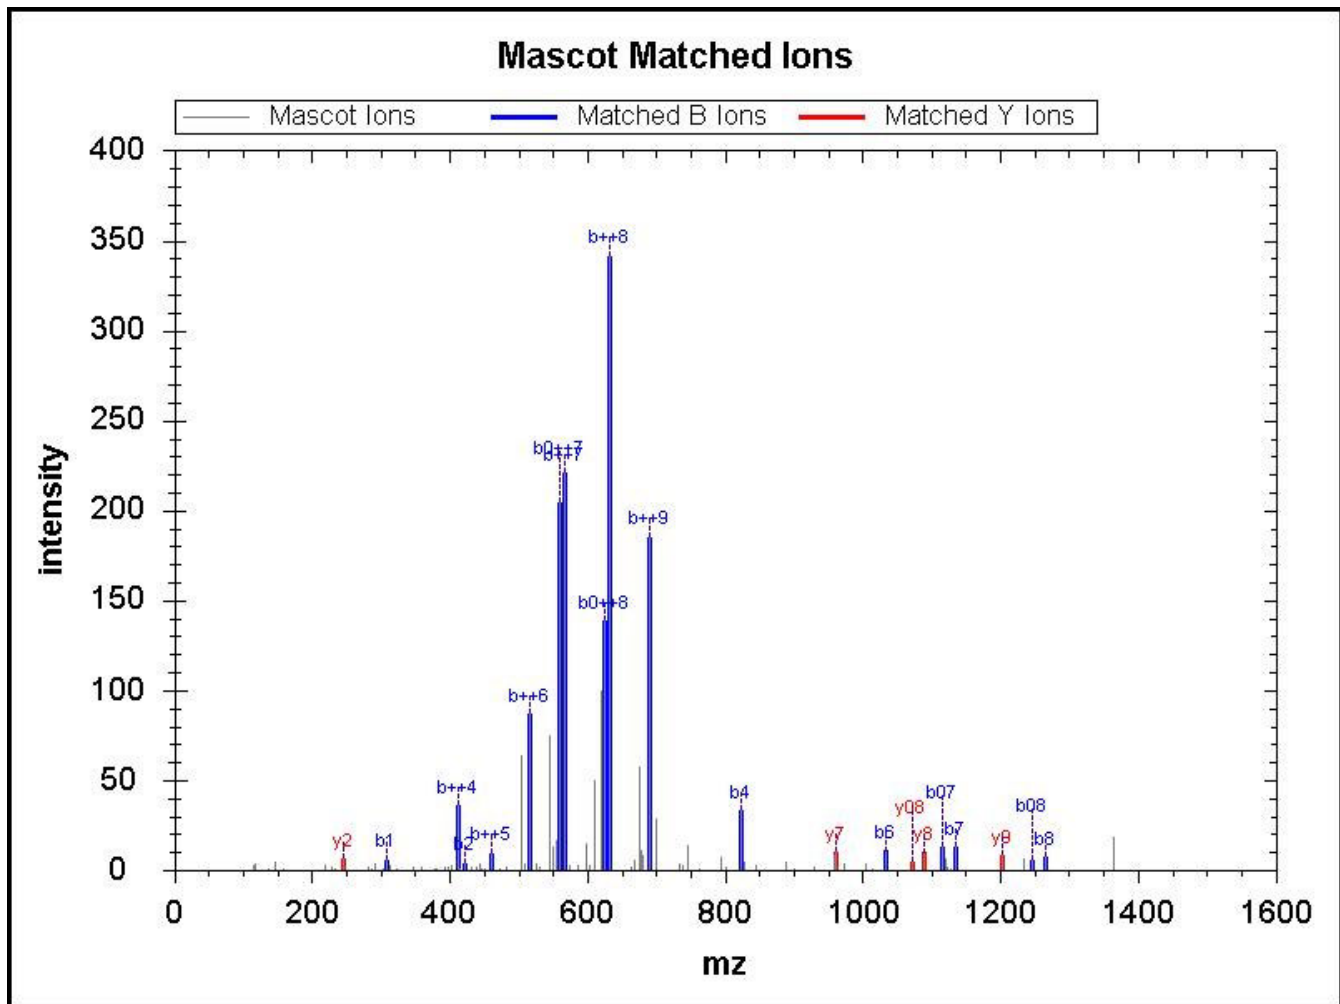

| No | b        | b++    | b*       | b*++   | b0       | b0++   | Seq | y        | y++    | y*       | y*++   | y0       | y0++   | RevNo |
|----|----------|--------|----------|--------|----------|--------|-----|----------|--------|----------|--------|----------|--------|-------|
| 1  | 308.17   | 154.59 |          |        |          |        | Y   |          |        |          |        |          |        | 10    |
| 2  | 421.26   | 211.13 |          |        |          |        | L   | 1,201.73 | 601.37 | 1,184.71 | 592.86 | 1,183.72 | 592.37 | 9     |
| 3  | 550.30   | 275.65 |          |        | 532.29   | 266.65 | E   | 1,088.65 | 544.83 | 1,071.62 | 536.32 | 1,070.64 | 535.82 | 8     |
| 4  | 822.50   | 411.75 | 805.47   | 403.24 | 804.49   | 402.75 | K   | 959.61   | 480.31 | 942.58   | 471.79 | 941.60   | 471.30 | 7     |
| 5  | 919.55   | 460.28 | 902.52   | 451.76 | 901.54   | 451.27 | P   | 687.41   | 344.21 |          |        | 669.40   | 335.20 | 6     |
| 6  | 1,032.63 | 516.82 | 1,015.61 | 508.31 | 1,014.62 | 507.82 | I   | 590.36   | 295.68 |          |        | 572.35   | 286.68 | 5     |
| 7  | 1,133.68 | 567.34 | 1,116.65 | 558.83 | 1,115.67 | 558.34 | T   | 477.27   | 239.14 |          |        | 459.26   | 230.14 | 4     |
| 8  | 1,264.72 | 632.86 | 1,247.70 | 624.35 | 1,246.71 | 623.86 | M   | 376.23   | 188.62 |          |        |          |        | 3     |
| 9  | 1,377.81 | 689.41 | 1,360.78 | 680.89 | 1,359.80 | 680.40 | L   | 245.19   | 123.10 |          |        |          |        | 2     |
| 10 |          |        |          |        |          |        | L   | 132.10   | 66.55  |          |        |          |        | 1     |

Query 20774 Hit 1

MS/MS Fragmentation of IAKVETVPK

Found in sp|Q07864|DPOE1\_HUMAN, DNA polymerase epsilon catalytic subunit A OS=Homo sapiens GN=POLE PE=1 SV=5

Match to Query 20774: 1271.805 from (636.91, 2+)

Title: 788: Scan 1824 (rt=50.252, f=3, i=267) [D:\lab212\membrane\Grace\Joyce\iTRAQ\_30\_1.raw]

Data File: Submitted from 20120508-1 (merge) by Mascot Daemon on JOYCE-VAIO

Monoisotopic mass of neutral peptide Mr(calc): 1271.805

Variable modifications:

K9 iTRAQ4plex (K)

Ions Score: 40.19 Expect: 0.035



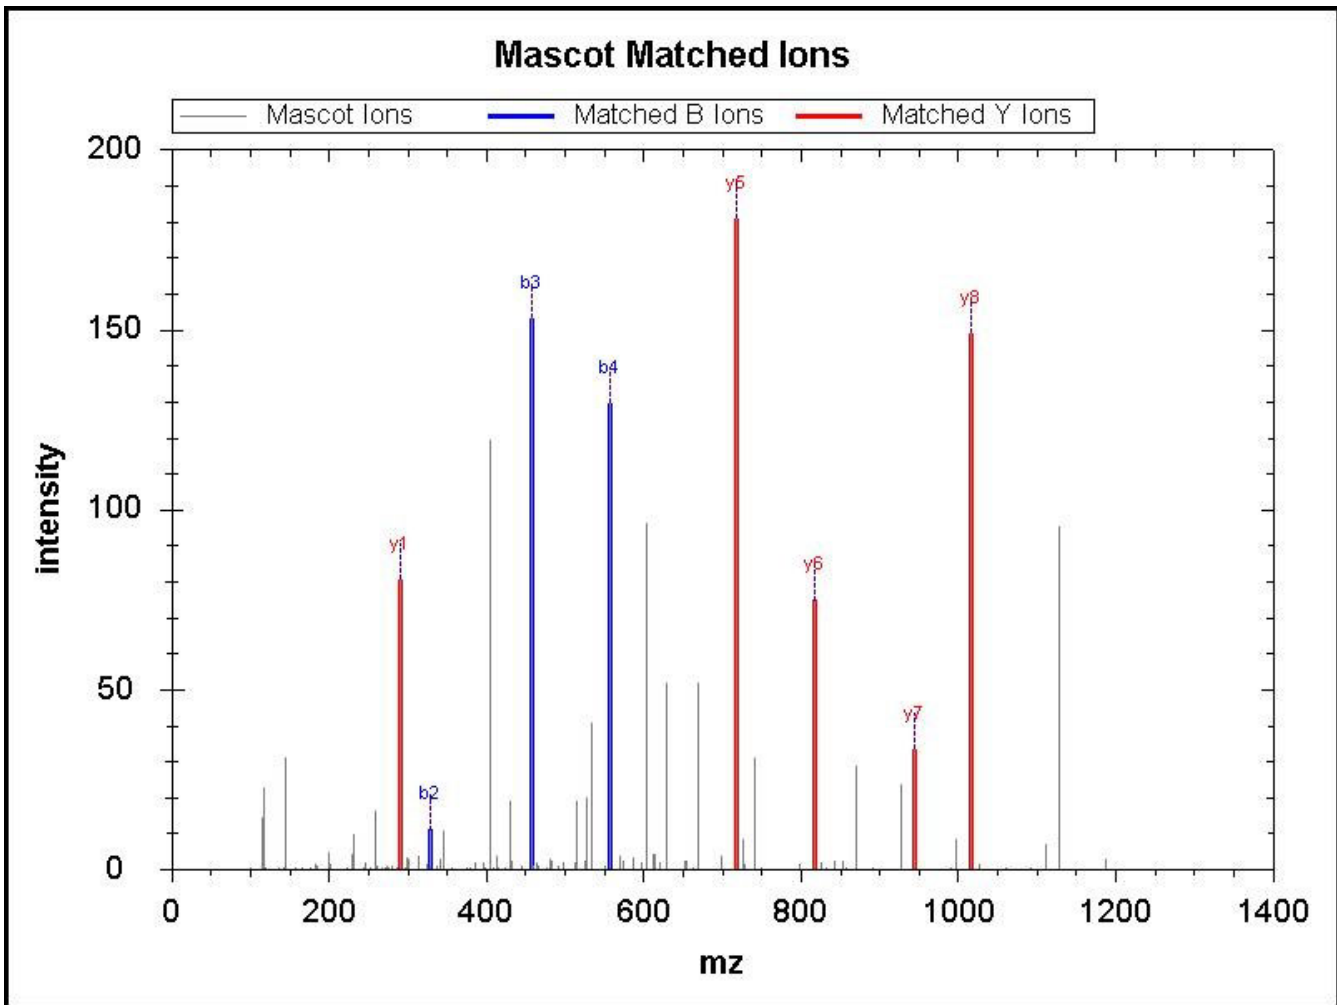

| No | b      | b++    | b*     | b*++   | b0     | b0++   | Seq | y        | y++    | y*     | y*++   | y0     | y0++   | RevNo |
|----|--------|--------|--------|--------|--------|--------|-----|----------|--------|--------|--------|--------|--------|-------|
| 1  | 258.19 | 129.60 |        |        |        |        | I   |          |        |        |        |        |        | 9     |
| 2  | 329.23 | 165.12 |        |        |        |        | A   | 1,015.63 | 508.32 | 998.60 | 499.80 | 997.62 | 499.31 | 8     |
| 3  | 457.33 | 229.17 | 440.30 | 220.65 |        |        | K   | 944.59   | 472.80 | 927.56 | 464.29 | 926.58 | 463.79 | 7     |
| 4  | 556.39 | 278.70 | 539.37 | 270.19 |        |        | V   | 816.49   | 408.75 | 799.47 | 400.24 | 798.48 | 399.75 | 6     |
| 5  | 685.44 | 343.22 | 668.41 | 334.71 | 667.43 | 334.22 | E   | 717.43   | 359.22 | 700.40 | 350.70 | 699.42 | 350.21 | 5     |
| 6  | 786.48 | 393.75 | 769.46 | 385.23 | 768.47 | 384.74 | T   | 588.38   | 294.70 | 571.36 | 286.18 | 570.37 | 285.69 | 4     |
| 7  | 885.55 | 443.28 | 868.53 | 434.77 | 867.54 | 434.27 | V   | 487.34   | 244.17 | 470.31 | 235.66 |        |        | 3     |
| 8  | 982.61 | 491.81 | 965.58 | 483.29 | 964.59 | 482.80 | P   | 388.27   | 194.64 | 371.24 | 186.12 |        |        | 2     |
| 9  |        |        |        |        |        |        | K   | 291.21   | 146.11 | 274.19 | 137.60 |        |        | 1     |

Query 46575 Hit 1

MS/MS Fragmentation of **IALLPLLQAETDRR**

Found in **sp|Q9P0J0|NDUAD\_HUMAN**, NADH dehydrogenase [ubiquinone] 1 alpha subcomplex subunit 13 OS=Homo sapiens GN=NDUFA13 PE=1 SV=3

Match to Query 46575: 1752.038from(585.0198,3+)

Title: 864: Scan 1934 (rt=52.9713, f=2, i=304) [D:\lab212\membrane\Grace\Joyce\iTRAQ\_35\_2.raw]

Data File: Submitted from 20120508-1(merge) by Mascot Daemon on JOYCE-VAIO

Monoisotopic mass of neutral peptide Mr(calc): 1752.038

Variable modifications:

Ions Score: 40.15 Expect: 0.039

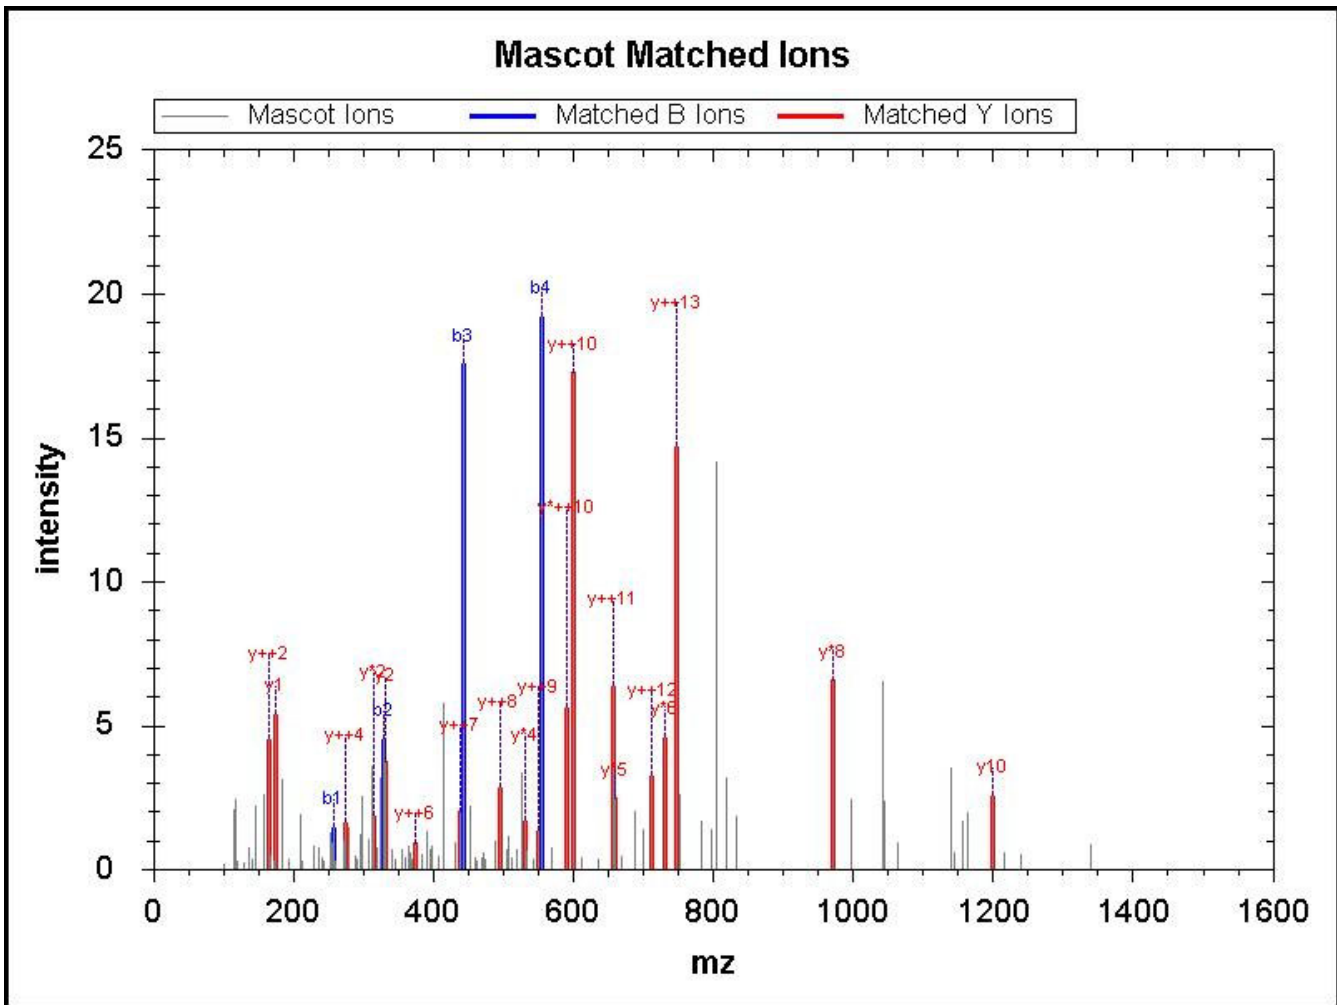

| No | b        | b++    | b*       | b*++   | b0       | b0++   | Seq | y        | y++    | y*       | y*++   | y0       | y0++   | RevNo |
|----|----------|--------|----------|--------|----------|--------|-----|----------|--------|----------|--------|----------|--------|-------|
| 1  | 258.19   | 129.60 |          |        |          |        | I   |          |        |          |        |          |        | 14    |
| 2  | 329.23   | 165.12 |          |        |          |        | A   | 1,495.86 | 748.43 | 1,478.83 | 739.92 | 1,477.85 | 739.43 | 13    |
| 3  | 442.31   | 221.66 |          |        |          |        | L   | 1,424.82 | 712.91 | 1,407.80 | 704.40 | 1,406.81 | 703.91 | 12    |
| 4  | 555.40   | 278.20 |          |        |          |        | L   | 1,311.74 | 656.37 | 1,294.71 | 647.86 | 1,293.73 | 647.37 | 11    |
| 5  | 652.45   | 326.73 |          |        |          |        | P   | 1,198.65 | 599.83 | 1,181.63 | 591.32 | 1,180.64 | 590.83 | 10    |
| 6  | 765.54   | 383.27 |          |        |          |        | L   | 1,101.60 | 551.30 | 1,084.57 | 542.79 | 1,083.59 | 542.30 | 9     |
| 7  | 878.62   | 439.81 |          |        |          |        | L   | 988.52   | 494.76 | 971.49   | 486.25 | 970.51   | 485.76 | 8     |
| 8  | 1,006.68 | 503.84 | 989.65   | 495.33 |          |        | Q   | 875.43   | 438.22 | 858.41   | 429.71 | 857.42   | 429.21 | 7     |
| 9  | 1,077.72 | 539.36 | 1,060.69 | 530.85 |          |        | A   | 747.37   | 374.19 | 730.35   | 365.68 | 729.36   | 365.19 | 6     |
| 10 | 1,206.76 | 603.88 | 1,189.73 | 595.37 | 1,188.75 | 594.88 | E   | 676.34   | 338.67 | 659.31   | 330.16 | 658.33   | 329.67 | 5     |
| 11 | 1,307.81 | 654.41 | 1,290.78 | 645.89 | 1,289.79 | 645.40 | T   | 547.29   | 274.15 | 530.27   | 265.64 | 529.28   | 265.15 | 4     |
| 12 | 1,422.83 | 711.92 | 1,405.81 | 703.41 | 1,404.82 | 702.91 | D   | 446.25   | 223.63 | 429.22   | 215.11 | 428.24   | 214.62 | 3     |
| 13 | 1,578.93 | 789.97 | 1,561.91 | 781.46 | 1,560.92 | 780.97 | R   | 331.22   | 166.11 | 314.19   | 157.60 |          |        | 2     |
| 14 |          |        |          |        |          |        | R   | 175.12   | 88.06  | 158.09   | 79.55  |          |        | 1     |

Query 43662 Hit 1

MS/MS Fragmentation of **IKPSESNTILGR**

Found in **sp|O75530|EED\_HUMAN**, Polycomb protein EED OS=Homo sapiens GN=EED PE=1 SV=2

Match to Query 43662: 1701 from(568.0074,3+)

Title: 163: Sum of 2 scans in range 1079 (rt=31.364, f=4, i=91) to 1080 (rt=31.3894, f=4, i=92)

[D:\lab212\membrane\Grace\Joyce\iTRAQ\_43\_2.raw]

Data File: Submitted from 20120508-1(merge) by Mascot Daemon on JOYCE-VAIO

Monoisotopic mass of neutral peptide Mr(calc): 1701

Variable modifications:

K2 iTRAQ4plex (K)



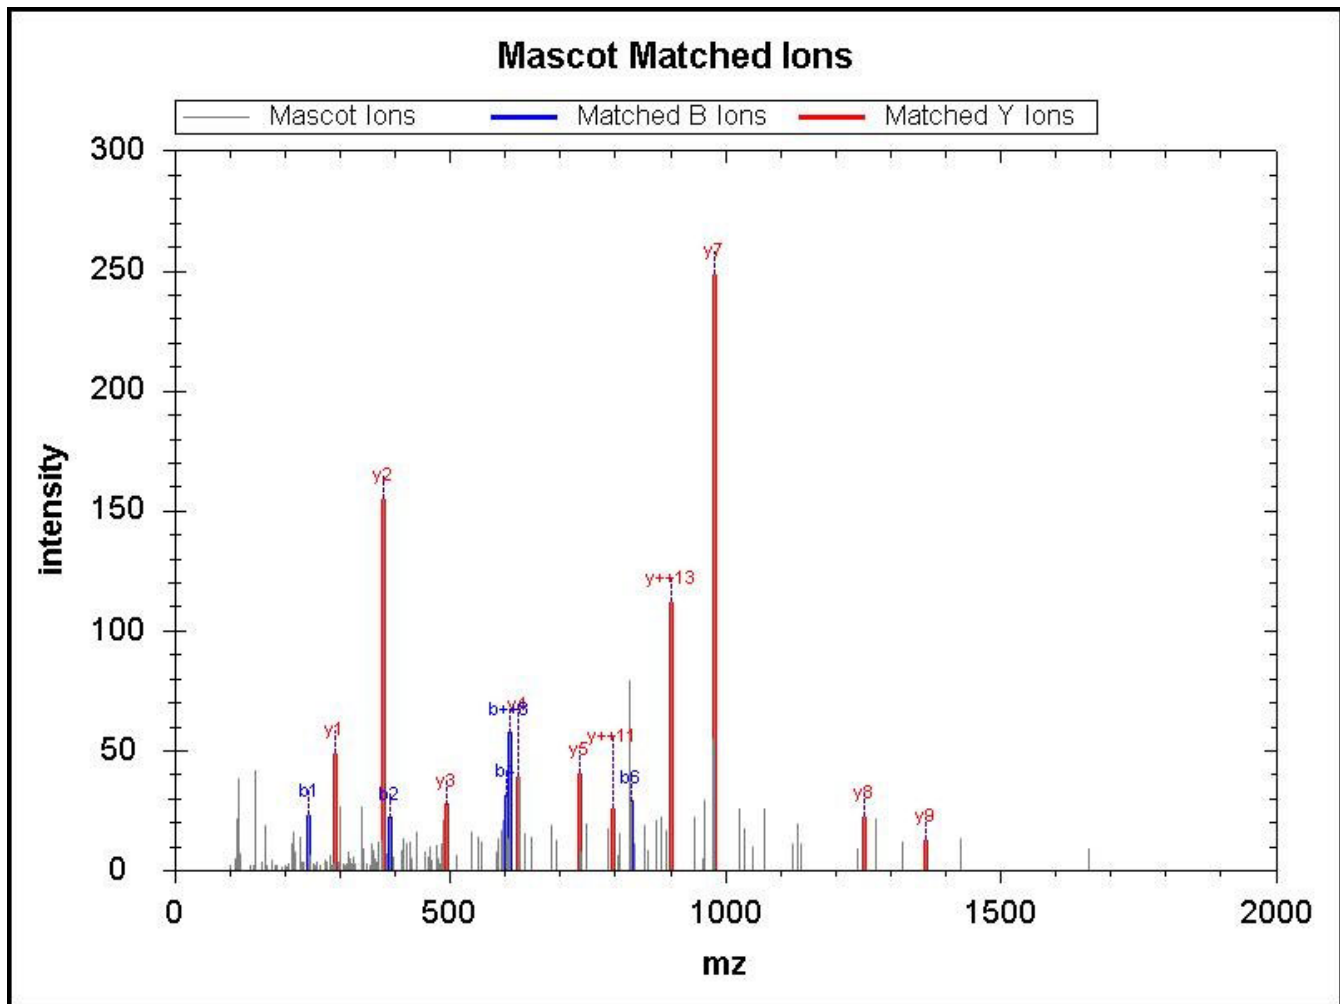

| No | b        | b++    | b*       | b*++   | b0       | b0++   | Seq | y        | y++    | y*       | y*++   | y0       | y0++   | RevNo |
|----|----------|--------|----------|--------|----------|--------|-----|----------|--------|----------|--------|----------|--------|-------|
| 1  | 244.18   | 122.59 |          |        |          |        | V   |          |        |          |        |          |        | 15    |
| 2  | 391.25   | 196.13 |          |        |          |        | F   | 1,950.09 | 975.55 | 1,933.07 | 967.04 | 1,932.08 | 966.55 | 14    |
| 3  | 488.30   | 244.65 |          |        |          |        | P   | 1,803.03 | 902.02 | 1,786.00 | 893.50 | 1,785.01 | 893.01 | 13    |
| 4  | 602.34   | 301.67 | 585.32   | 293.16 |          |        | N   | 1,705.97 | 853.49 | 1,688.95 | 844.98 | 1,687.96 | 844.48 | 12    |
| 5  | 730.40   | 365.70 | 713.37   | 357.19 |          |        | Q   | 1,591.93 | 796.47 | 1,574.90 | 787.96 | 1,573.92 | 787.46 | 11    |
| 6  | 829.47   | 415.24 | 812.44   | 406.72 |          |        | V   | 1,463.87 | 732.44 | 1,446.84 | 723.93 | 1,445.86 | 723.43 | 10    |
| 7  | 942.55   | 471.78 | 925.53   | 463.27 |          |        | L   | 1,364.80 | 682.91 | 1,347.78 | 674.39 | 1,346.79 | 673.90 | 9     |
| 8  | 1,214.75 | 607.88 | 1,197.72 | 599.37 |          |        | K   | 1,251.72 | 626.36 | 1,234.69 | 617.85 | 1,233.71 | 617.36 | 8     |
| 9  | 1,311.80 | 656.41 | 1,294.78 | 647.89 |          |        | P   | 979.52   | 490.26 | 962.50   | 481.75 | 961.51   | 481.26 | 7     |
| 10 | 1,458.87 | 729.94 | 1,441.84 | 721.43 |          |        | F   | 882.47   | 441.74 | 865.44   | 433.22 | 864.46   | 432.73 | 6     |
| 11 | 1,571.96 | 786.48 | 1,554.93 | 777.97 |          |        | L   | 735.40   | 368.20 | 718.37   | 359.69 | 717.39   | 359.20 | 5     |
| 12 | 1,701.00 | 851.00 | 1,683.97 | 842.49 | 1,682.99 | 842.00 | E   | 622.32   | 311.66 | 605.29   | 303.15 | 604.31   | 302.66 | 4     |
| 13 | 1,816.02 | 908.52 | 1,799.00 | 900.00 | 1,798.01 | 899.51 | D   | 493.27   | 247.14 | 476.25   | 238.63 | 475.26   | 238.14 | 3     |
| 14 | 1,903.06 | 952.03 | 1,886.03 | 943.52 | 1,885.05 | 943.03 | S   | 378.25   | 189.63 | 361.22   | 181.11 | 360.24   | 180.62 | 2     |
| 15 |          |        |          |        |          |        | K   | 291.21   | 146.11 | 274.19   | 137.60 |          |        | 1     |

Query 3508 Hit 1

MS/MS Fragmentation of **NLIVIR**

Found in **sp|Q9UDX3|S14L4\_HUMAN**, SEC14-like protein 4 OS=Homo sapiens GN=SEC14L4 PE=2 SV=1

Match to Query 3508: 871.5637from(436.7891,2+)

Title: 265: Sum of 2 scans in range 1328 (rt=35.8605, f=4, i=163) to 1329 (rt=35.8859, f=4, i=164)

[D:\lab212\membrane\GraceJoyce\iTRAQ\_25\_1.raw]

Data File:Submitted from 20120508-1(merge) by Mascot Daemon on JOYCE-VAIO

Monoisotopic mass of neutral peptide Mr(calc): 871.5637

Variable modifications:

N1 :Deamidated (NQ)

Ions Score: 39.18 Expect: 0.046

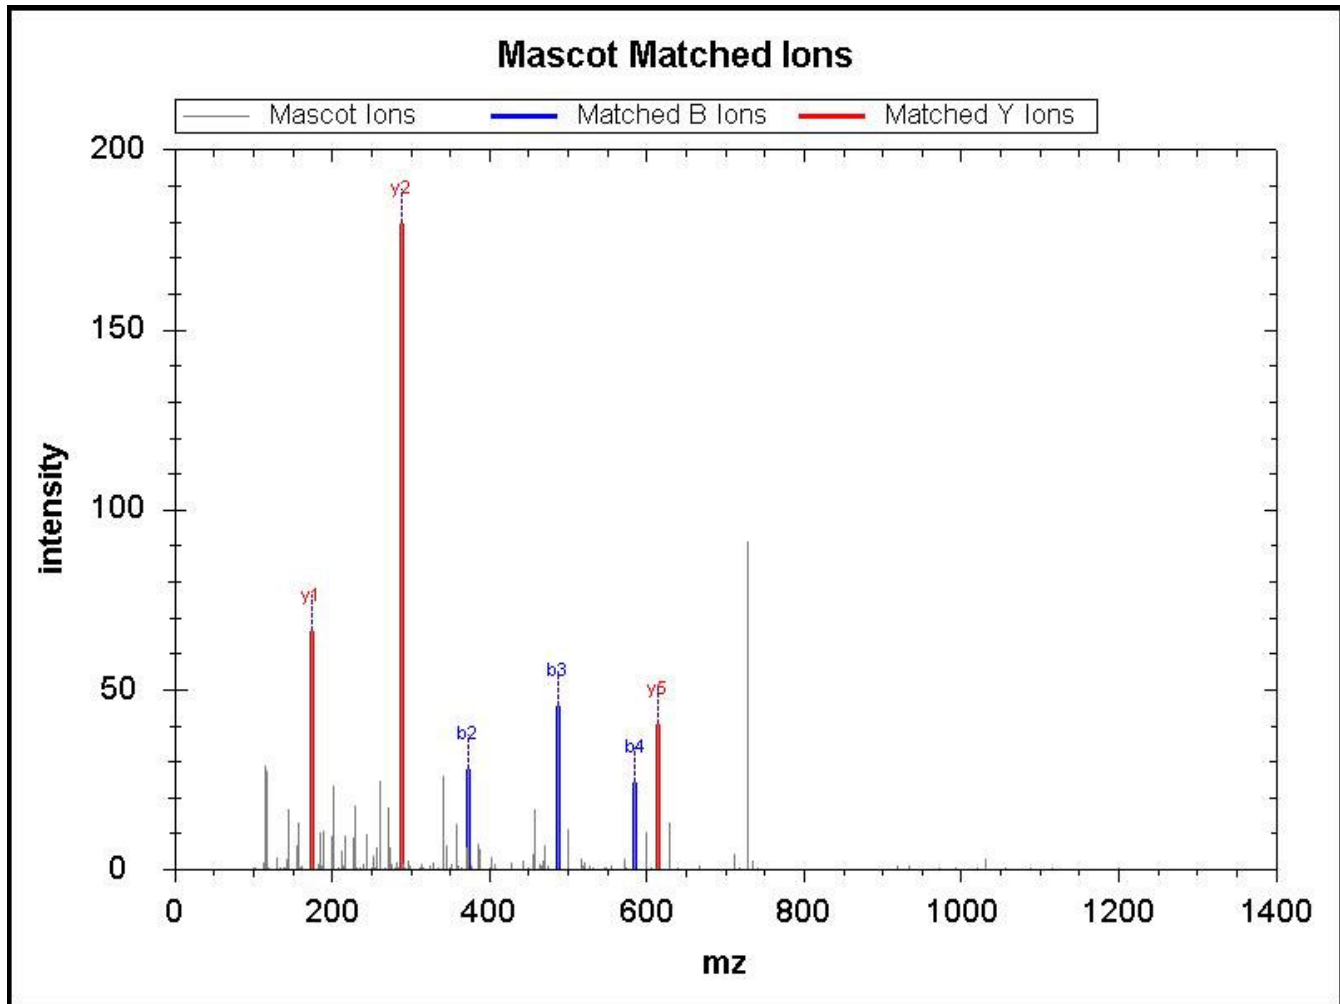

| No | b      | b++    | b*     | b*++   | Seq | y      | y++    | y*     | y*++   | RevNo |
|----|--------|--------|--------|--------|-----|--------|--------|--------|--------|-------|
| 1  | 260.14 | 130.57 | 243.11 | 122.06 | N   |        |        |        |        | 6     |
| 2  | 373.22 | 187.11 | 356.19 | 178.60 | L   | 613.44 | 307.22 | 596.41 | 298.71 | 5     |
| 3  | 486.30 | 243.66 | 469.28 | 235.14 | I   | 500.36 | 250.68 | 483.33 | 242.17 | 4     |
| 4  | 585.37 | 293.19 | 568.35 | 284.68 | V   | 387.27 | 194.14 | 370.24 | 185.63 | 3     |
| 5  | 698.46 | 349.73 | 681.43 | 341.22 | I   | 288.20 | 144.61 | 271.18 | 136.09 | 2     |
| 6  |        |        |        |        | R   | 175.12 | 88.06  | 158.09 | 79.55  | 1     |

Query 5225 Hit 1

MS/MS Fragmentation of **DAALLEAAR**

Found in **sp|Q9H078|CLPB\_HUMAN**, Caseinolytic peptidase B protein homolog OS=Homo sapiens GN=CLPB PE=1 SV=1

Match to Query 5225: 928.5833 from (465.2989, 2+)

Title: 409: Scan 997 (rt=31.8038, f=2, i=163) [D:\lab212\membrane\Grace\Joyce\iTRAQ\_25\_2.raw]

Data File:Submitted from 20120508-1(merge) by Mascot Daemon on JOYCE-VAIO

Monoisotopic mass of neutral peptide Mr(calc): 928.5833

Variable modifications:

Ions Score: 39.12 Expect: 0.051

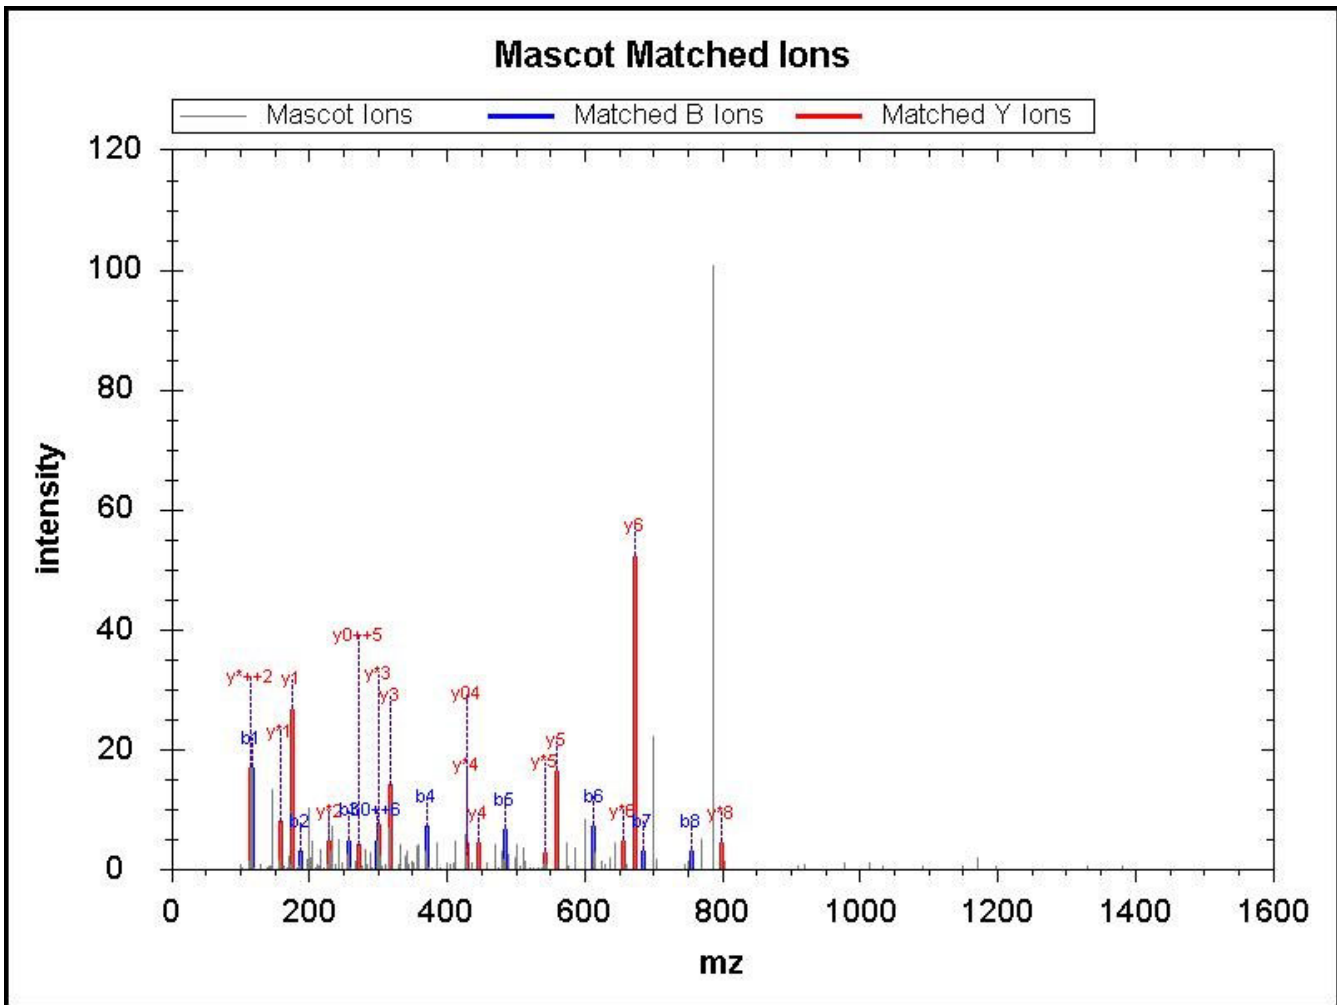

| No | b      | b++    | b0     | b0++   | Seq | y      | y++    | y*     | y*++   | y0     | y0++   | RevNo |
|----|--------|--------|--------|--------|-----|--------|--------|--------|--------|--------|--------|-------|
| 1  | 116.03 | 58.52  | 98.02  | 49.52  | D   |        |        |        |        |        |        | 9     |
| 2  | 187.07 | 94.04  | 169.06 | 85.03  | A   | 814.48 | 407.74 | 797.45 | 399.23 | 796.47 | 398.74 | 8     |
| 3  | 258.11 | 129.56 | 240.10 | 120.55 | A   | 743.44 | 372.22 | 726.41 | 363.71 | 725.43 | 363.22 | 7     |
| 4  | 371.19 | 186.10 | 353.18 | 177.09 | L   | 672.40 | 336.71 | 655.38 | 328.19 | 654.39 | 327.70 | 6     |
| 5  | 484.28 | 242.64 | 466.27 | 233.64 | L   | 559.32 | 280.16 | 542.29 | 271.65 | 541.31 | 271.16 | 5     |
| 6  | 613.32 | 307.16 | 595.31 | 298.16 | E   | 446.24 | 223.62 | 429.21 | 215.11 | 428.23 | 214.62 | 4     |
| 7  | 684.36 | 342.68 | 666.35 | 333.68 | A   | 317.19 | 159.10 | 300.17 | 150.59 |        |        | 3     |
| 8  | 755.39 | 378.20 | 737.38 | 369.20 | A   | 246.16 | 123.58 | 229.13 | 115.07 |        |        | 2     |
| 9  |        |        |        |        | R   | 175.12 | 88.06  | 158.09 | 79.55  |        |        | 1     |

Query 45777 Hit 1

MS/MS Fragmentation of **ILQLLAETFHHK**

Found in **sp|Q9NNW5|WDR6\_HUMAN**, WD repeat-containing protein 6 OS=Homo sapiens GN=WDR6 PE=1 SV=1

Match to Query 45777: 1737.022from(580.0147,3+)

Title: 1016: Scan 2177 (rt=58.7163, f=2, i=350) [D:\lab212\membrane\Grace\Joyce\iTRAQ\_50\_1.raw]

Data File: Submitted from 20120508-1(merge) by Mascot Daemon on JOYCE-VAIO

Monoisotopic mass of neutral peptide Mr(calc): 1737.022

Variable modifications:

K12 :iTRAQ4plex (K)

Ions Score: 39.11 Expect: 0.056

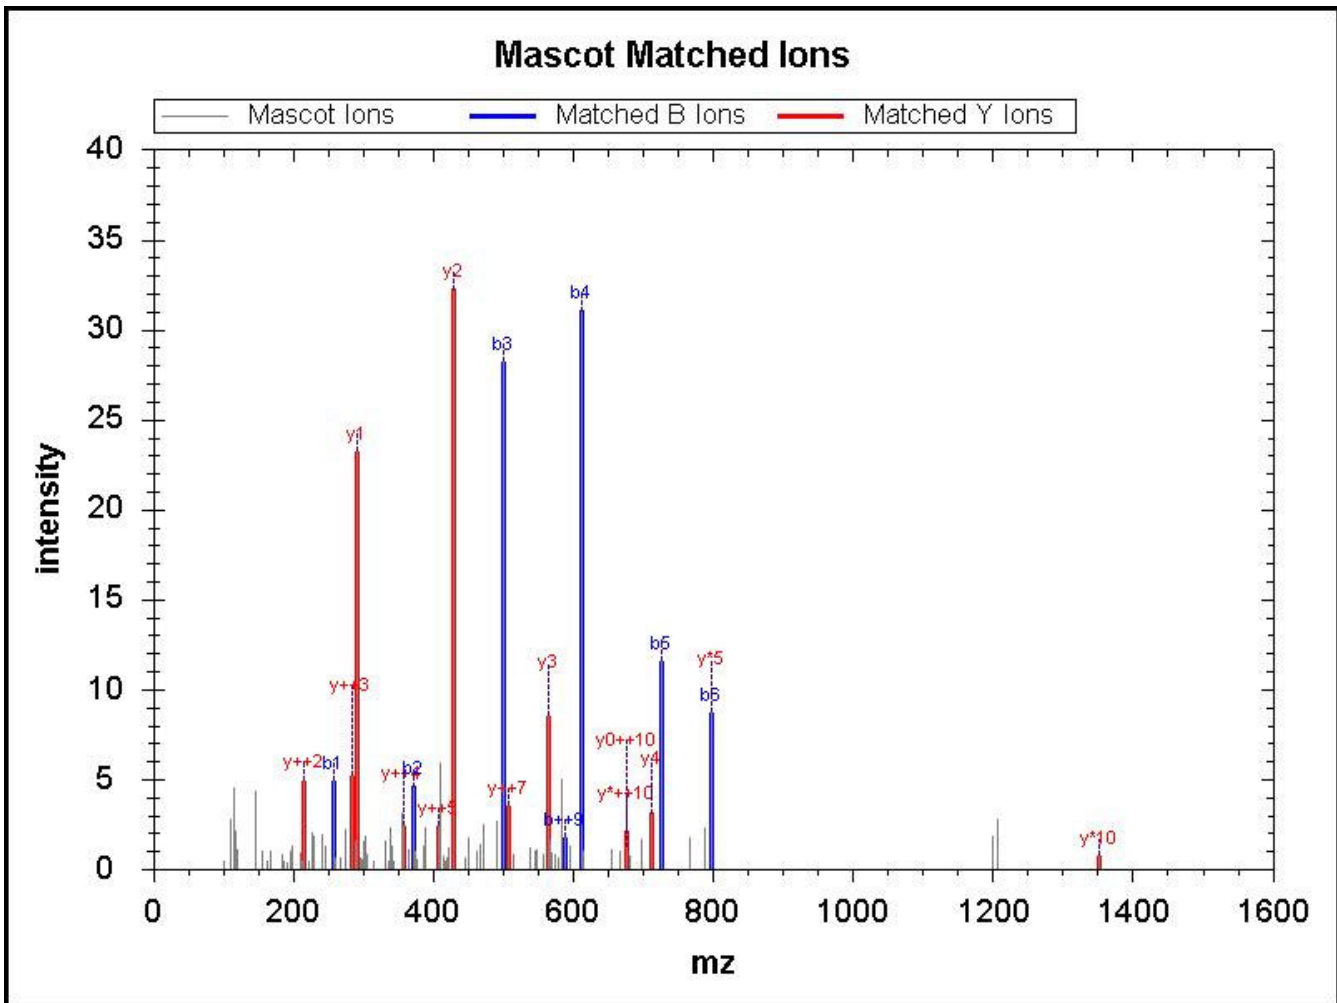

| No | b        | b++    | b*       | b*++   | b0       | b0++   | Seq | y        | y++    | y*       | y*++   | y0       | y0++   | RevNo |
|----|----------|--------|----------|--------|----------|--------|-----|----------|--------|----------|--------|----------|--------|-------|
| 1  | 258.19   | 129.60 |          |        |          |        | I   |          |        |          |        |          |        | 12    |
| 2  | 371.28   | 186.14 |          |        |          |        | L   | 1,480.84 | 740.92 | 1,463.81 | 732.41 | 1,462.83 | 731.92 | 11    |
| 3  | 499.34   | 250.17 | 482.31   | 241.66 |          |        | Q   | 1,367.76 | 684.38 | 1,350.73 | 675.87 | 1,349.74 | 675.38 | 10    |
| 4  | 612.42   | 306.71 | 595.39   | 298.20 |          |        | L   | 1,239.70 | 620.35 | 1,222.67 | 611.84 | 1,221.69 | 611.35 | 9     |
| 5  | 725.50   | 363.26 | 708.48   | 354.74 |          |        | L   | 1,126.61 | 563.81 | 1,109.59 | 555.30 | 1,108.60 | 554.80 | 8     |
| 6  | 796.54   | 398.77 | 779.51   | 390.26 |          |        | A   | 1,013.53 | 507.27 | 996.50   | 498.75 | 995.52   | 498.26 | 7     |
| 7  | 925.58   | 463.30 | 908.56   | 454.78 | 907.57   | 454.29 | E   | 942.49   | 471.75 | 925.46   | 463.24 | 924.48   | 462.74 | 6     |
| 8  | 1,026.63 | 513.82 | 1,009.61 | 505.31 | 1,008.62 | 504.81 | T   | 813.45   | 407.23 | 796.42   | 398.71 | 795.44   | 398.22 | 5     |
| 9  | 1,173.70 | 587.35 | 1,156.67 | 578.84 | 1,155.69 | 578.35 | F   | 712.40   | 356.70 | 695.37   | 348.19 |          |        | 4     |
| 10 | 1,310.76 | 655.88 | 1,293.73 | 647.37 | 1,292.75 | 646.88 | H   | 565.33   | 283.17 | 548.31   | 274.66 |          |        | 3     |
| 11 | 1,447.82 | 724.41 | 1,430.79 | 715.90 | 1,429.81 | 715.41 | H   | 428.27   | 214.64 | 411.25   | 206.13 |          |        | 2     |
| 12 |          |        |          |        |          |        | K   | 291.21   | 146.11 | 274.19   | 137.60 |          |        | 1     |

Query 3400 Hit 1

MS/MS Fragmentation of **GSLSSFK**

Found in **sp|Q8BRE0|RD3\_MOUSE**, Protein RD3 OS=Mus musculus GN=Rd3 PE=2 SV=1

Match to Query 3400: 868.5229from(435.2687,2+)

Title: 279: Sum of 2 scans in range 707 (rt=25.3047, f=4, i=185) to 708 (rt=25.3301, f=4, i=186)

[D:\lab212\membrane\GraceJoyce\iTRAQ\_35\_1.raw]

Data File: Submitted from 20120508-1(merge) by Mascot Daemon on JOYCE-VAIO

Monoisotopic mass of neutral peptide Mr(calc): 868.5229

Variable modifications:

K7 :iTRAQ4plex (K)

Ions Score: 38.97 Expect: 0.043

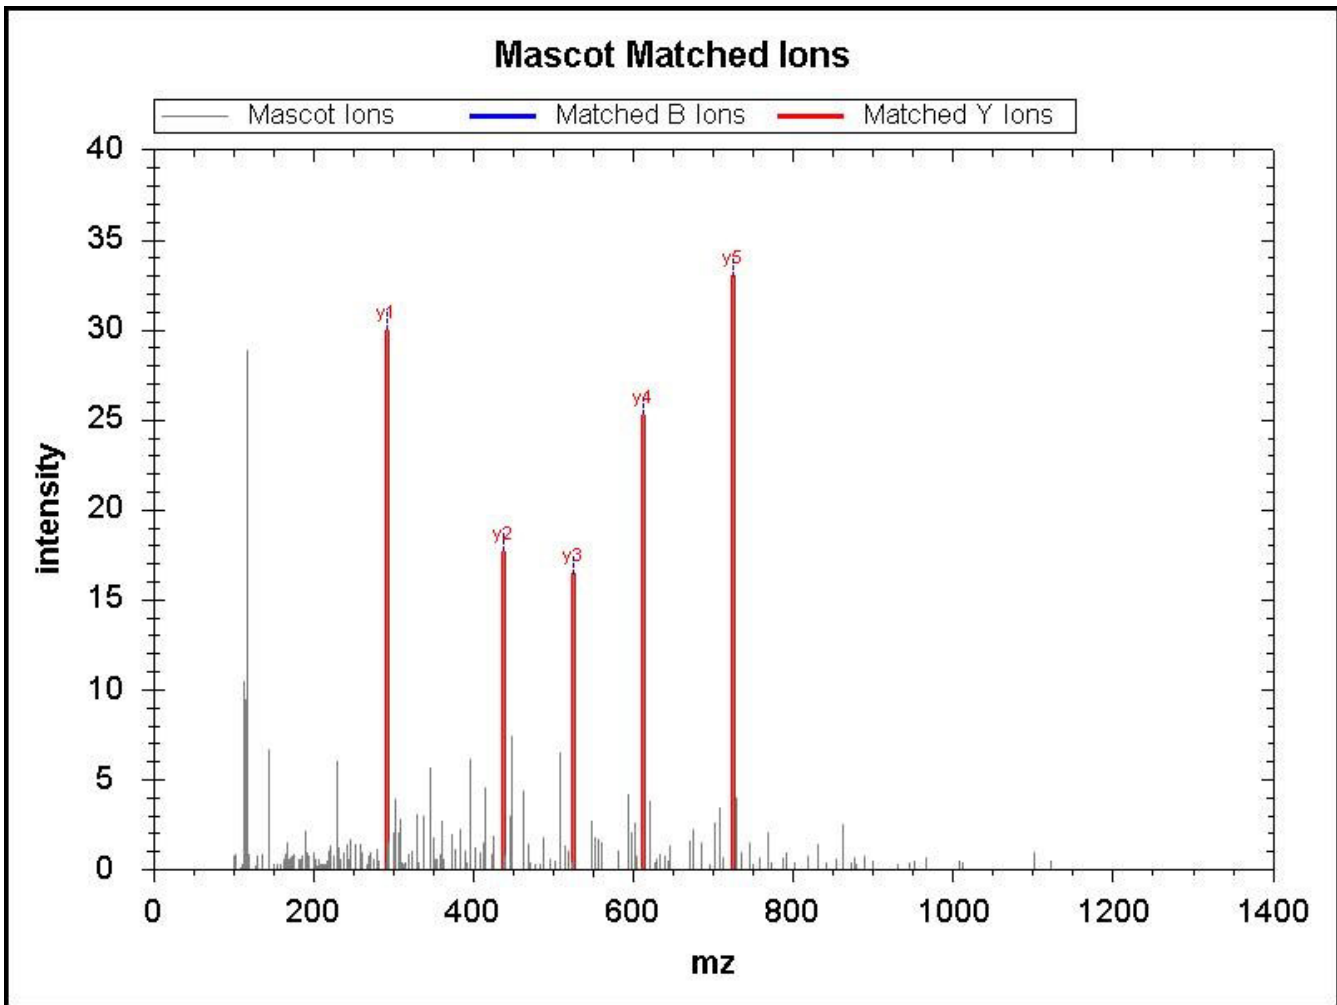

| No | b      | b++    | b0     | b0++   | Seq | y      | y++    | y*     | y*++   | y0     | y0++   | RevNo |
|----|--------|--------|--------|--------|-----|--------|--------|--------|--------|--------|--------|-------|
| 1  | 58.03  | 29.52  |        |        | G   |        |        |        |        |        |        | 7     |
| 2  | 145.06 | 73.03  | 127.05 | 64.03  | S   | 812.46 | 406.74 | 795.44 | 398.22 | 794.45 | 397.73 | 6     |
| 3  | 258.14 | 129.58 | 240.13 | 120.57 | L   | 725.43 | 363.22 | 708.40 | 354.71 | 707.42 | 354.21 | 5     |
| 4  | 345.18 | 173.09 | 327.17 | 164.09 | S   | 612.35 | 306.68 | 595.32 | 298.16 | 594.34 | 297.67 | 4     |
| 5  | 432.21 | 216.61 | 414.20 | 207.60 | S   | 525.32 | 263.16 | 508.29 | 254.65 | 507.30 | 254.16 | 3     |
| 6  | 579.28 | 290.14 | 561.27 | 281.14 | F   | 438.28 | 219.65 | 421.26 | 211.13 |        |        | 2     |
| 7  |        |        |        |        | K   | 291.21 | 146.11 | 274.19 | 137.60 |        |        | 1     |

Query 42507 Hit 1

MS/MS Fragmentation of **DTILAE LLQIHK**

Found in [sp|P46100|ATRX\\_HUMAN](#), Transcriptional regulator ATRX OS=Homo sapiens GN=ATRX PE=1 SV=5

Match to Query 42507: 1681.004from(561.342,3+)

Title: 959: Sum of 2 scans in range 2106 (rt=56.8984, f=4, i=637) to 2107 (rt=56.9239, f=4, i=638)

[D:\lab212\membrane\Grace\Joyce\iTRAQ\_37\_2.raw]

Data File: Submitted from 20120508-1(merge) by Mascot Daemon on JOYCE-VAIO

Monoisotopic mass of neutral peptide Mr(calc): 1681.004

Variable modifications:

K12 :iTRAQ4plex (K)

Ions Score: 38.95 Expect: 0.048



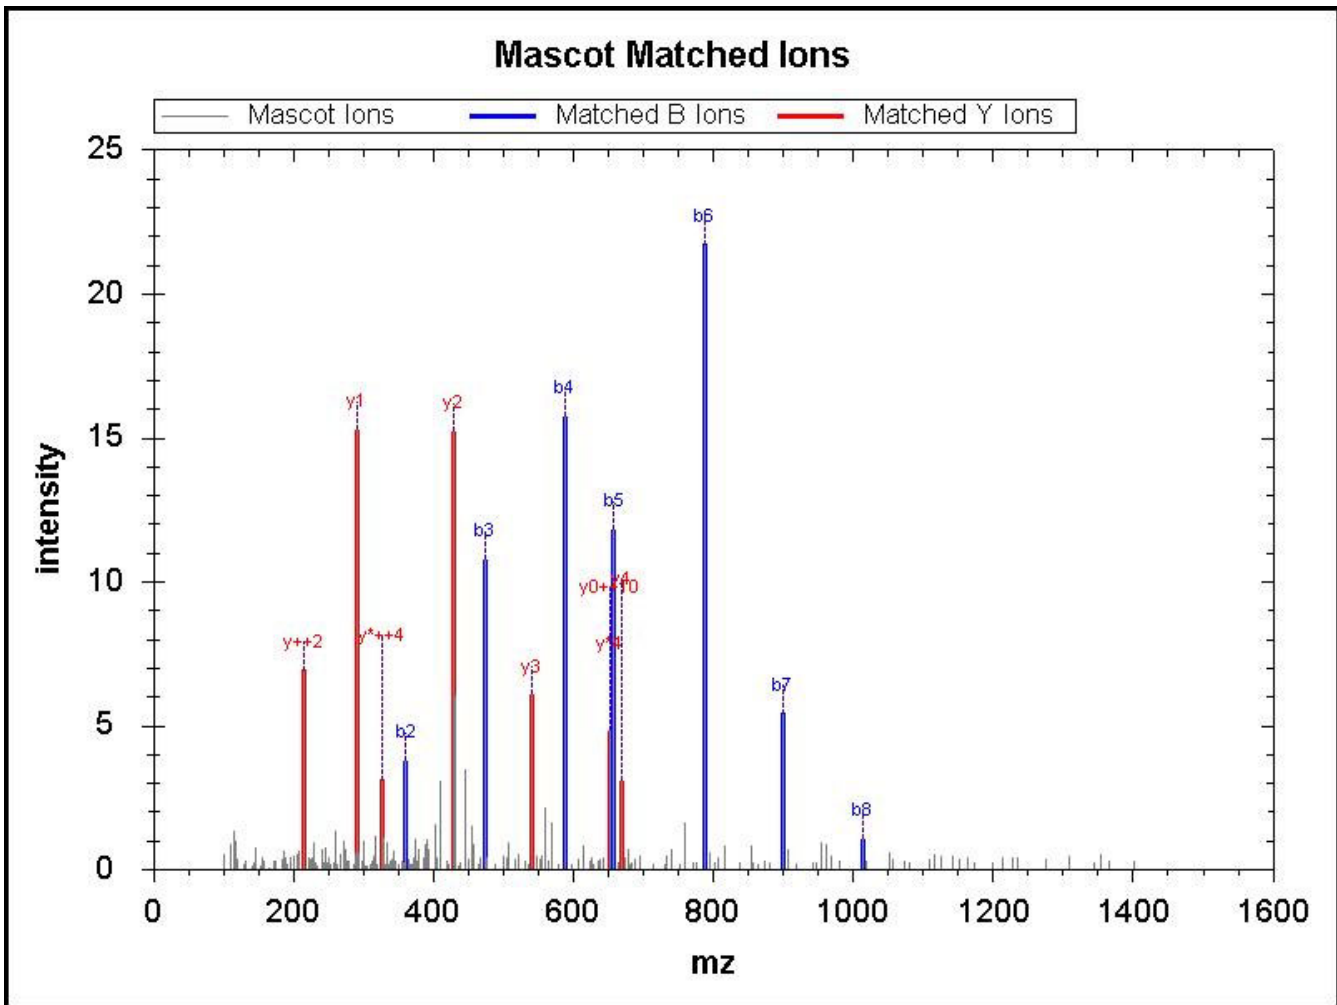

| No | b        | b++    | b*       | b*++   | b0       | b0++   | Seq | y        | y++    | y*       | y*++   | y0       | y0++   | RevNo |
|----|----------|--------|----------|--------|----------|--------|-----|----------|--------|----------|--------|----------|--------|-------|
| 1  | 260.14   | 130.57 |          |        | 242.13   | 121.57 | D   |          |        |          |        |          |        | 12    |
| 2  | 361.18   | 181.10 |          |        | 343.17   | 172.09 | T   | 1,422.88 | 711.94 | 1,405.85 | 703.43 | 1,404.87 | 702.94 | 11    |
| 3  | 474.27   | 237.64 |          |        | 456.26   | 228.63 | I   | 1,321.83 | 661.42 | 1,304.81 | 652.91 | 1,303.82 | 652.41 | 10    |
| 4  | 587.35   | 294.18 |          |        | 569.34   | 285.17 | L   | 1,208.75 | 604.88 | 1,191.72 | 596.36 | 1,190.74 | 595.87 | 9     |
| 5  | 658.39   | 329.70 |          |        | 640.38   | 320.69 | A   | 1,095.66 | 548.34 | 1,078.64 | 539.82 | 1,077.65 | 539.33 | 8     |
| 6  | 787.43   | 394.22 |          |        | 769.42   | 385.21 | E   | 1,024.63 | 512.82 | 1,007.60 | 504.30 | 1,006.62 | 503.81 | 7     |
| 7  | 900.52   | 450.76 |          |        | 882.51   | 441.76 | L   | 895.58   | 448.30 | 878.56   | 439.78 |          |        | 6     |
| 8  | 1,013.60 | 507.30 |          |        | 995.59   | 498.30 | L   | 782.50   | 391.75 | 765.47   | 383.24 |          |        | 5     |
| 9  | 1,141.66 | 571.33 | 1,124.63 | 562.82 | 1,123.65 | 562.33 | Q   | 669.42   | 335.21 | 652.39   | 326.70 |          |        | 4     |
| 10 | 1,254.74 | 627.87 | 1,237.72 | 619.36 | 1,236.73 | 618.87 | I   | 541.36   | 271.18 | 524.33   | 262.67 |          |        | 3     |
| 11 | 1,391.80 | 696.40 | 1,374.78 | 687.89 | 1,373.79 | 687.40 | H   | 428.27   | 214.64 | 411.25   | 206.13 |          |        | 2     |
| 12 |          |        |          |        |          |        | K   | 291.21   | 146.11 | 274.19   | 137.60 |          |        | 1     |

Query 44665 Hit 1

MS/MS Fragmentation of **EALLLLEDIKK**

Found in **sp|O15091|MRRP3\_HUMAN**, Mitochondrial ribonuclease P protein 3 OS=Homo sapiens GN=KIAA0391 PE=1 SV=2  
Match to Query 44665: 1716.078from(573.0331,3+)

Title: 827: Scan 1843 (rt=51.11, f=3, i=286) [D:\lab212\membrane\GraceJoyce\iTRAQ\_44\_1.raw]

Data File: Submitted from 20120508-1(merge) by Mascot Daemon on JOYCE-VAIO

Monoisotopic mass of neutral peptide Mr(calc): 1716.078

Variable modifications:

K10 iTRAQ4plex (K)

K11 iTRAQ4plex (K)

Ions Score: 38.85 Expect: 0.025

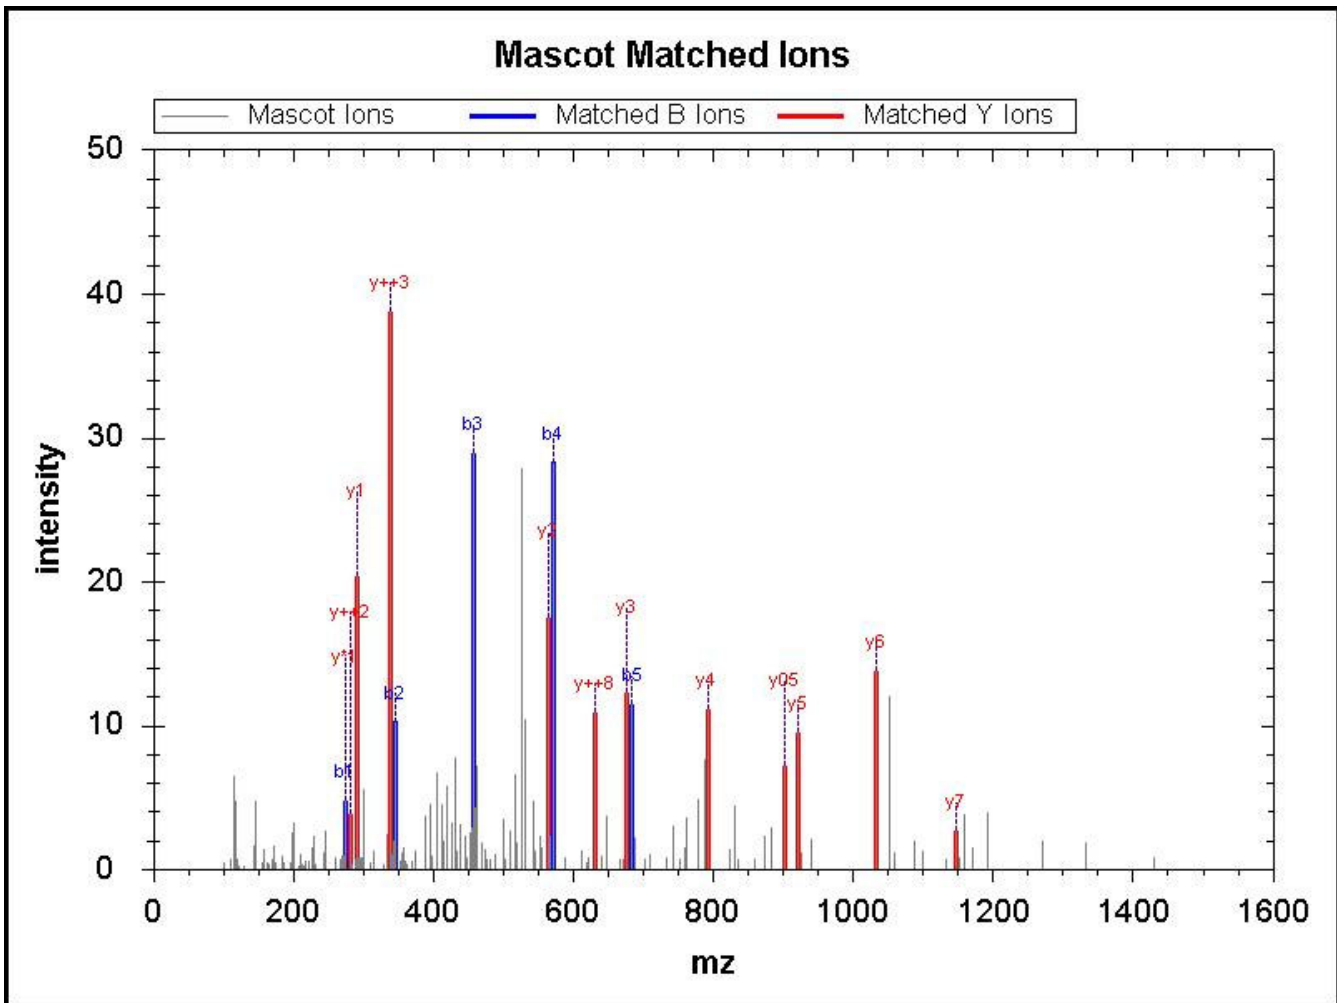

| No | b        | b++    | b*       | b*++   | b0       | b0++   | Seq | y        | y++    | y*       | y*++   | y0       | y0++   | RevNo |
|----|----------|--------|----------|--------|----------|--------|-----|----------|--------|----------|--------|----------|--------|-------|
| 1  | 274.15   | 137.58 |          |        | 256.14   | 128.57 | E   |          |        |          |        |          |        | 11    |
| 2  | 345.19   | 173.10 |          |        | 327.18   | 164.09 | A   | 1,443.94 | 722.47 | 1,426.91 | 713.96 | 1,425.93 | 713.47 | 10    |
| 3  | 458.27   | 229.64 |          |        | 440.26   | 220.63 | L   | 1,372.90 | 686.95 | 1,355.88 | 678.44 | 1,354.89 | 677.95 | 9     |
| 4  | 571.36   | 286.18 |          |        | 553.35   | 277.18 | L   | 1,259.82 | 630.41 | 1,242.79 | 621.90 | 1,241.81 | 621.41 | 8     |
| 5  | 684.44   | 342.72 |          |        | 666.43   | 333.72 | L   | 1,146.73 | 573.87 | 1,129.71 | 565.36 | 1,128.72 | 564.87 | 7     |
| 6  | 797.53   | 399.27 |          |        | 779.51   | 390.26 | L   | 1,033.65 | 517.33 | 1,016.62 | 508.82 | 1,015.64 | 508.32 | 6     |
| 7  | 926.57   | 463.79 |          |        | 908.56   | 454.78 | E   | 920.57   | 460.79 | 903.54   | 452.27 | 902.55   | 451.78 | 5     |
| 8  | 1,041.59 | 521.30 |          |        | 1,023.58 | 512.30 | D   | 791.52   | 396.27 | 774.50   | 387.75 | 773.51   | 387.26 | 4     |
| 9  | 1,154.68 | 577.84 |          |        | 1,136.67 | 568.84 | I   | 676.50   | 338.75 | 659.47   | 330.24 |          |        | 3     |
| 10 | 1,426.88 | 713.94 | 1,409.85 | 705.43 | 1,408.87 | 704.94 | K   | 563.41   | 282.21 | 546.39   | 273.70 |          |        | 2     |
| 11 |          |        |          |        |          |        | K   | 291.21   | 146.11 | 274.19   | 137.60 |          |        | 1     |

Query 11522 Hit 1

MS/MS Fragmentation of **LSSILFK**

Found in [sp|O60879|DIAP2\\_HUMAN](#), Protein diaphanous homolog 2 OS=Homo sapiens GN=DIAPH2 PE=1 SV=1

Match to Query 11522: 1094.69 from (548.3524, 2+)

Title: 695: Sum of 2 scans in range 1581 (rt=44.974, f=4, i=465) to 1582 (rt=44.9995, f=4, i=466)

[D:\lab212\membrane\Grace\Joyce\iTRAQ\_31\_2.raw]

Data File: Submitted from 20120508-1 (merge) by Mascot Daemon on JOYCE-VAIO

Monoisotopic mass of neutral peptide Mr(calc): 1094.69

Variable modifications:

K7 iTRAQ4plex (K)

Ions Score: 38.27 Expect: 0.053

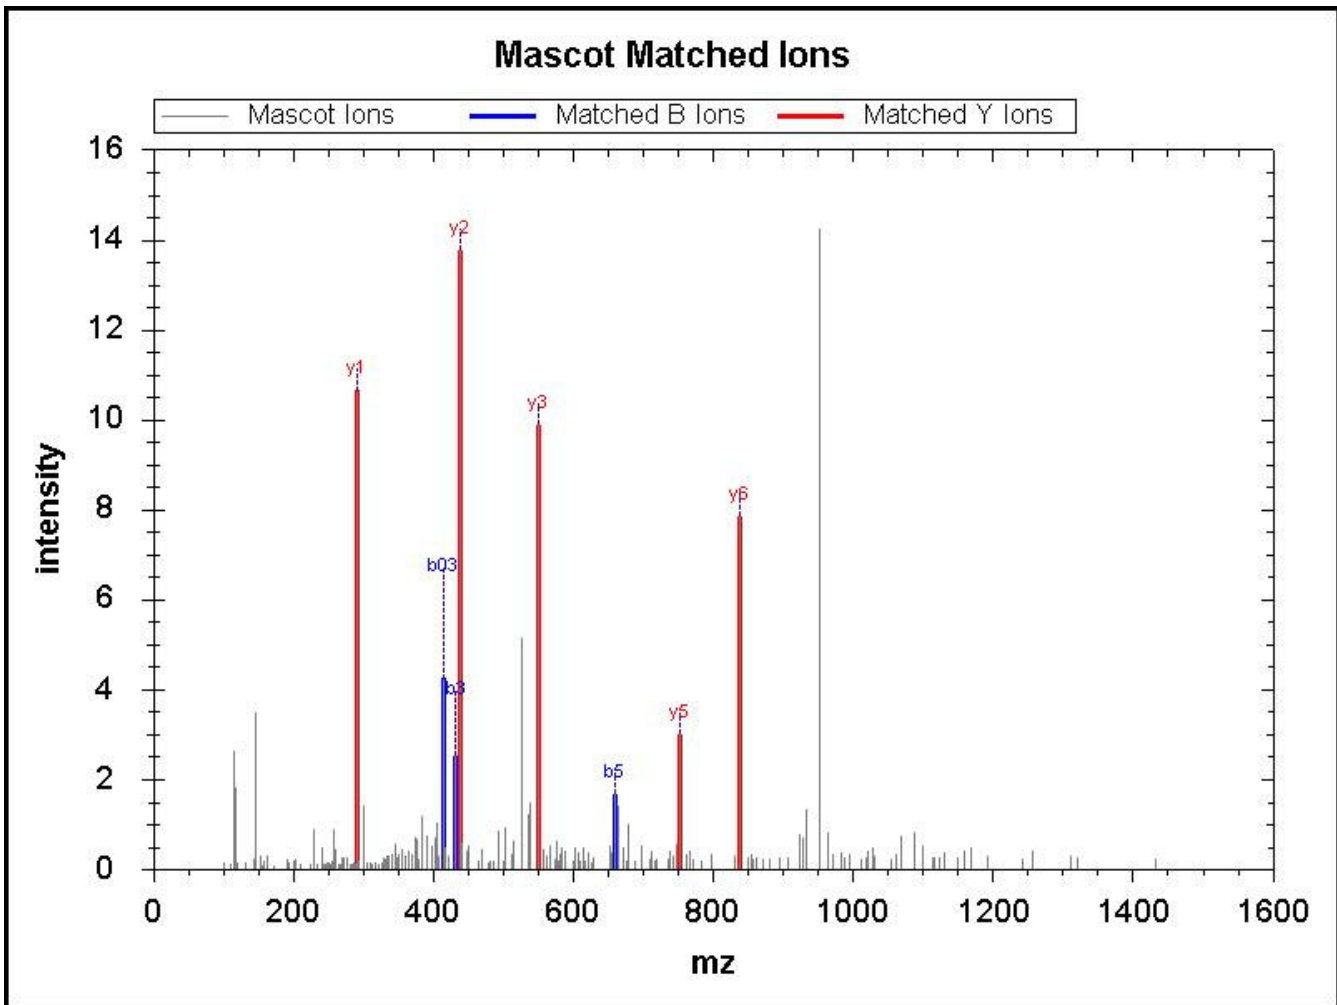

| No | b      | b++    | b0     | b0++   | Seq | y      | y++    | y*     | y*++   | y0     | y0++   | RevNo |
|----|--------|--------|--------|--------|-----|--------|--------|--------|--------|--------|--------|-------|
| 1  | 258.19 | 129.60 |        |        | L   |        |        |        |        |        |        | 7     |
| 2  | 345.23 | 173.12 | 327.21 | 164.11 | S   | 838.52 | 419.76 | 821.49 | 411.25 | 820.50 | 410.76 | 6     |
| 3  | 432.26 | 216.63 | 414.25 | 207.63 | S   | 751.48 | 376.25 | 734.46 | 367.73 | 733.47 | 367.24 | 5     |
| 4  | 545.34 | 273.17 | 527.33 | 264.17 | I   | 664.45 | 332.73 | 647.42 | 324.22 |        |        | 4     |
| 5  | 658.43 | 329.72 | 640.41 | 320.71 | L   | 551.37 | 276.19 | 534.34 | 267.67 |        |        | 3     |
| 6  | 805.49 | 403.25 | 787.48 | 394.25 | F   | 438.28 | 219.65 | 421.26 | 211.13 |        |        | 2     |
| 7  |        |        |        |        | K   | 291.21 | 146.11 | 274.19 | 137.60 |        |        | 1     |

Query 48021 Hit 1

MS/MS Fragmentation of **ENAEQGEVDMESH**R

Found in **sp|P14209|CD99\_HUMAN**, CD99 antigen OS=Homo sapiens GN=CD99 PE=1 SV=1

Match to Query 48021: 1773.777 from (592.2662, 3+)

Title: 110: Scan 359 (rt=17.4153, f=3, i=41) [D:\lab212\membrane\Grace\Joyce\iTRAQ\_38\_1.raw]

Data File: Submitted from 20120508-1 (merge) by Mascot Daemon on JOYCE-VAIO

Monoisotopic mass of neutral peptide Mr(calc): 1773.777

Variable modifications:

Ions Score: 38.11 Expect: 0.059

### Mascot Matched Ions

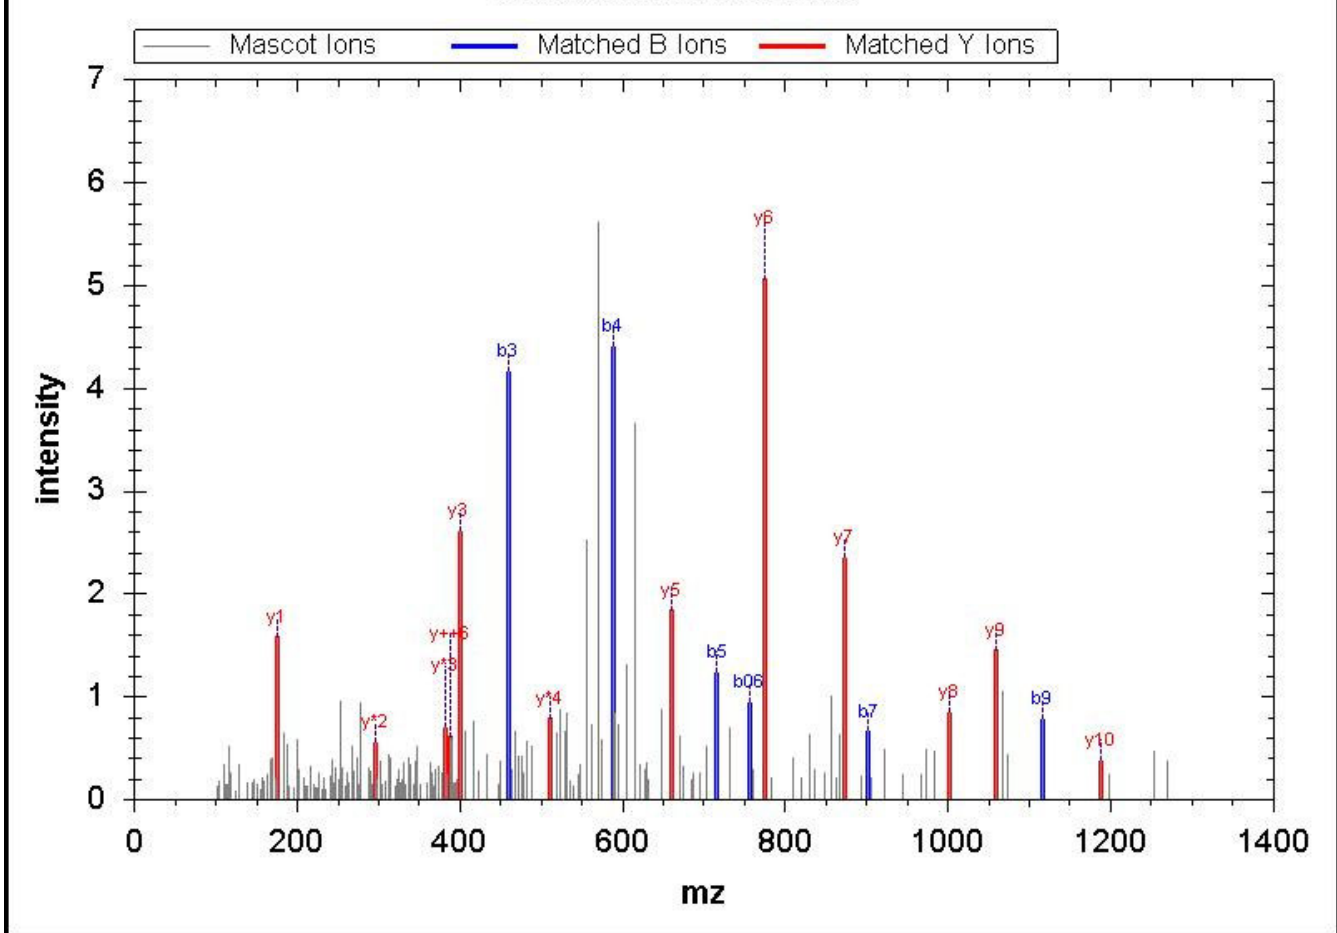

| No | b        | b++    | b*       | b*++   | b0       | b0++   | Seq | y        | y++    | y*       | y*++   | y0       | y0++   | RevNo |
|----|----------|--------|----------|--------|----------|--------|-----|----------|--------|----------|--------|----------|--------|-------|
| 1  | 274.15   | 137.58 |          |        | 256.14   | 128.57 | E   |          |        |          |        |          |        | 14    |
| 2  | 388.19   | 194.60 | 371.17   | 186.09 | 370.18   | 185.60 | N   | 1,501.63 | 751.32 | 1,484.61 | 742.81 | 1,483.62 | 742.32 | 13    |
| 3  | 459.23   | 230.12 | 442.21   | 221.61 | 441.22   | 221.11 | A   | 1,387.59 | 694.30 | 1,370.56 | 685.79 | 1,369.58 | 685.29 | 12    |
| 4  | 588.27   | 294.64 | 571.25   | 286.13 | 570.26   | 285.64 | E   | 1,316.55 | 658.78 | 1,299.53 | 650.27 | 1,298.54 | 649.78 | 11    |
| 5  | 716.33   | 358.67 | 699.31   | 350.16 | 698.32   | 349.66 | Q   | 1,187.51 | 594.26 | 1,170.48 | 585.75 | 1,169.50 | 585.25 | 10    |
| 6  | 773.35   | 387.18 | 756.33   | 378.67 | 755.34   | 378.18 | G   | 1,059.45 | 530.23 | 1,042.43 | 521.72 | 1,041.44 | 521.22 | 9     |
| 7  | 902.40   | 451.70 | 885.37   | 443.19 | 884.39   | 442.70 | E   | 1,002.43 | 501.72 | 985.40   | 493.21 | 984.42   | 492.71 | 8     |
| 8  | 1,001.47 | 501.24 | 984.44   | 492.72 | 983.46   | 492.23 | V   | 873.39   | 437.20 | 856.36   | 428.68 | 855.38   | 428.19 | 7     |
| 9  | 1,116.49 | 558.75 | 1,099.47 | 550.24 | 1,098.48 | 549.74 | D   | 774.32   | 387.66 | 757.29   | 379.15 | 756.31   | 378.66 | 6     |
| 10 | 1,247.53 | 624.27 | 1,230.51 | 615.76 | 1,229.52 | 615.26 | M   | 659.29   | 330.15 | 642.27   | 321.64 | 641.28   | 321.14 | 5     |
| 11 | 1,376.58 | 688.79 | 1,359.55 | 680.28 | 1,358.57 | 679.79 | E   | 528.25   | 264.63 | 511.23   | 256.12 | 510.24   | 255.62 | 4     |
| 12 | 1,463.61 | 732.31 | 1,446.58 | 723.79 | 1,445.60 | 723.30 | S   | 399.21   | 200.11 | 382.18   | 191.60 | 381.20   | 191.10 | 3     |
| 13 | 1,600.67 | 800.84 | 1,583.64 | 792.32 | 1,582.66 | 791.83 | H   | 312.18   | 156.59 | 295.15   | 148.08 |          |        | 2     |
| 14 |          |        |          |        |          |        | R   | 175.12   | 88.06  | 158.09   | 79.55  |          |        | 1     |

Query 76285 Hit 1

MS/MS Fragmentation of **LVHLQTLVLNGNPLLHAQLR**

Found in **sp|Q13045|FLII\_HUMAN**, Protein flightless-1 homolog OS=Homo sapiens GN=FLII PE=1 SV=2

Match to Query 76285: 2393.408 from (599.3594, 4+)

Title: 883: Sum of 2 scans in range 1924 (rt=53.084, f=4, i=596) to 1925 (rt=53.1094, f=4, i=597)

[D:\lab212\membrane\GraceJoyce\iTRAQ\_43\_1.raw]

Data File: Submitted from 20120508-1 (merge) by Mascot Daemon on JOYCE-VAIO

Monoisotopic mass of neutral peptide Mr(calc): 2393.408

Variable modifications:

N10 :Deamidated (NQ)

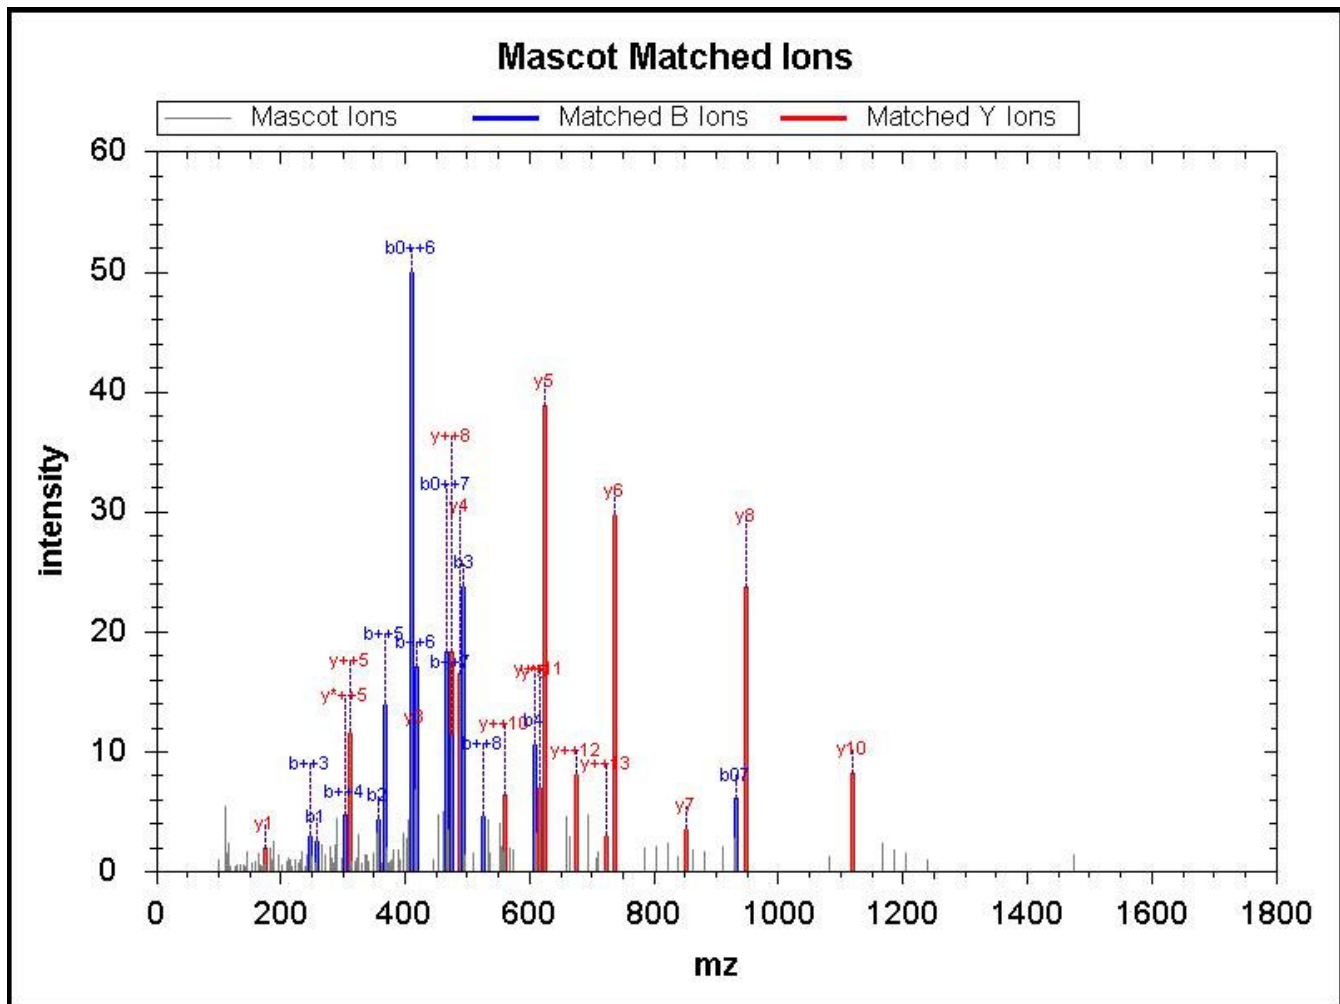

| No | b        | b++      | b*       | b*++     | b0       | b0++     | Seq | y        | y++      | y*       | y*++     | y0       | y0++     | RevNo |
|----|----------|----------|----------|----------|----------|----------|-----|----------|----------|----------|----------|----------|----------|-------|
| 1  | 258.19   | 129.60   |          |          |          |          | L   |          |          |          |          |          |          | 20    |
| 2  | 357.26   | 179.13   |          |          |          |          | V   | 2,137.22 | 1,069.12 | 2,120.20 | 1,060.60 | 2,119.21 | 1,060.11 | 19    |
| 3  | 494.32   | 247.66   |          |          |          |          | H   | 2,038.16 | 1,019.58 | 2,021.13 | 1,011.07 | 2,020.15 | 1,010.58 | 18    |
| 4  | 607.40   | 304.21   |          |          |          |          | L   | 1,901.10 | 951.05   | 1,884.07 | 942.54   | 1,883.09 | 942.05   | 17    |
| 5  | 735.46   | 368.24   | 718.44   | 359.72   |          |          | Q   | 1,788.01 | 894.51   | 1,770.99 | 886.00   | 1,770.00 | 885.50   | 16    |
| 6  | 836.51   | 418.76   | 819.48   | 410.25   | 818.50   | 409.75   | T   | 1,659.95 | 830.48   | 1,642.93 | 821.97   | 1,641.94 | 821.48   | 15    |
| 7  | 949.60   | 475.30   | 932.57   | 466.79   | 931.58   | 466.30   | L   | 1,558.91 | 779.96   | 1,541.88 | 771.44   |          |          | 14    |
| 8  | 1,048.66 | 524.84   | 1,031.64 | 516.32   | 1,030.65 | 515.83   | V   | 1,445.82 | 723.41   | 1,428.80 | 714.90   |          |          | 13    |
| 9  | 1,161.75 | 581.38   | 1,144.72 | 572.86   | 1,143.74 | 572.37   | L   | 1,346.75 | 673.88   | 1,329.73 | 665.37   |          |          | 12    |
| 10 | 1,276.77 | 638.89   | 1,259.75 | 630.38   | 1,258.76 | 629.89   | N   | 1,233.67 | 617.34   | 1,216.64 | 608.83   |          |          | 11    |
| 11 | 1,333.80 | 667.40   | 1,316.77 | 658.89   | 1,315.79 | 658.40   | G   | 1,118.64 | 559.83   | 1,101.62 | 551.31   |          |          | 10    |
| 12 | 1,447.84 | 724.42   | 1,430.81 | 715.91   | 1,429.83 | 715.42   | N   | 1,061.62 | 531.31   | 1,044.59 | 522.80   |          |          | 9     |
| 13 | 1,544.89 | 772.95   | 1,527.87 | 764.44   | 1,526.88 | 763.94   | P   | 947.58   | 474.29   | 930.55   | 465.78   |          |          | 8     |
| 14 | 1,657.98 | 829.49   | 1,640.95 | 820.98   | 1,639.97 | 820.49   | L   | 850.53   | 425.77   | 833.50   | 417.25   |          |          | 7     |
| 15 | 1,771.06 | 886.03   | 1,754.03 | 877.52   | 1,753.05 | 877.03   | L   | 737.44   | 369.22   | 720.42   | 360.71   |          |          | 6     |
| 16 | 1,908.12 | 954.56   | 1,891.09 | 946.05   | 1,890.11 | 945.56   | H   | 624.36   | 312.68   | 607.33   | 304.17   |          |          | 5     |
| 17 | 1,979.16 | 990.08   | 1,962.13 | 981.57   | 1,961.15 | 981.08   | A   | 487.30   | 244.15   | 470.27   | 235.64   |          |          | 4     |
| 18 | 2,107.21 | 1,054.11 | 2,090.19 | 1,045.60 | 2,089.20 | 1,045.11 | Q   | 416.26   | 208.63   | 399.24   | 200.12   |          |          | 3     |
| 19 | 2,220.30 | 1,110.65 | 2,203.27 | 1,102.14 | 2,202.29 | 1,101.65 | L   | 288.20   | 144.61   | 271.18   | 136.09   |          |          | 2     |
| 20 |          |          |          |          |          |          | R   | 175.12   | 88.06    | 158.09   | 79.55    |          |          | 1     |

MS/MS Fragmentation of **KLDTSGFSSILVTLTK**

Found in **sp|Q969F9|HPS3\_HUMAN**, Hermansky-Pudlak syndrome 3 protein OS=Homo sapiens GN=HPS3 PE=1 SV=1

Match to Query 66216: 2141.271 from (714.7643,3+)

Title: 964: Scan 2122 (rt=57.3968, f=3, i=331) [D:\lab212\membrane\Grace\Joyce\iTRAQ\_44\_1.raw]

Data File: Submitted from 20120508-1(merge) by Mascot Daemon on JOYCE-VAIO

Monoisotopic mass of neutral peptide Mr(calc): 2141.271

Variable modifications:

K1 iTRAQ4plex (K)

K16 iTRAQ4plex (K)

Ions Score: 36.59 Expect: 0.052

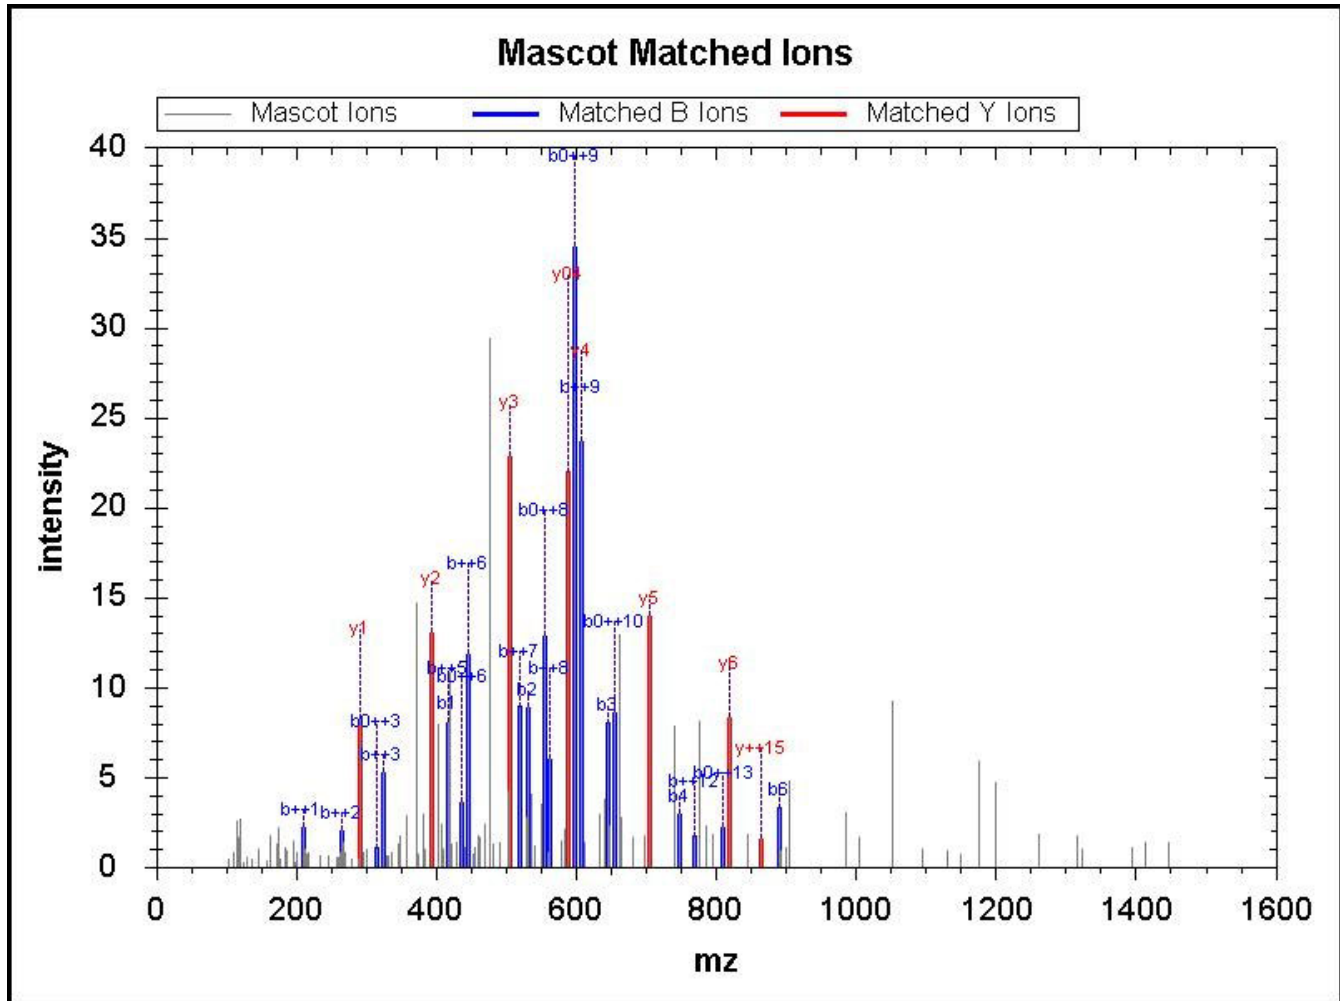

|    |  |  |  |  |  |   |        |        |        |        |  |  |   |
|----|--|--|--|--|--|---|--------|--------|--------|--------|--|--|---|
| 16 |  |  |  |  |  | K | 291.21 | 146.11 | 274.19 | 137.60 |  |  | 1 |
|----|--|--|--|--|--|---|--------|--------|--------|--------|--|--|---|

Query 28812 Hit 1

MS/MS Fragmentation of **LLVPILLPEK**

Found in **sp|O75352|MPUI\_HUMAN**, Mannose-P-dolichol utilization defect 1 protein OS=Homo sapiens GN=MPDU1 PE=1 SV=2

Match to Query 28812: 1421.95 from (711.9821, 2+)

Title: 940: Sum of 2 scans in range 2115 (rt=56.9781, f=4, i=633) to 2116 (rt=57.0035, f=4, i=634)

[D:\lab212\membrane\GraceJoyce\iTRAQ\_27\_1.raw]

Data File: Submitted from 20120508-1(merge) by Mascot Daemon on JOYCE-VAIO

Monoisotopic mass of neutral peptide Mr(calc): 1421.95

Variable modifications:

K10 iTRAQ4plex (K)

Ions Score: 36.26 Expect: 0.021

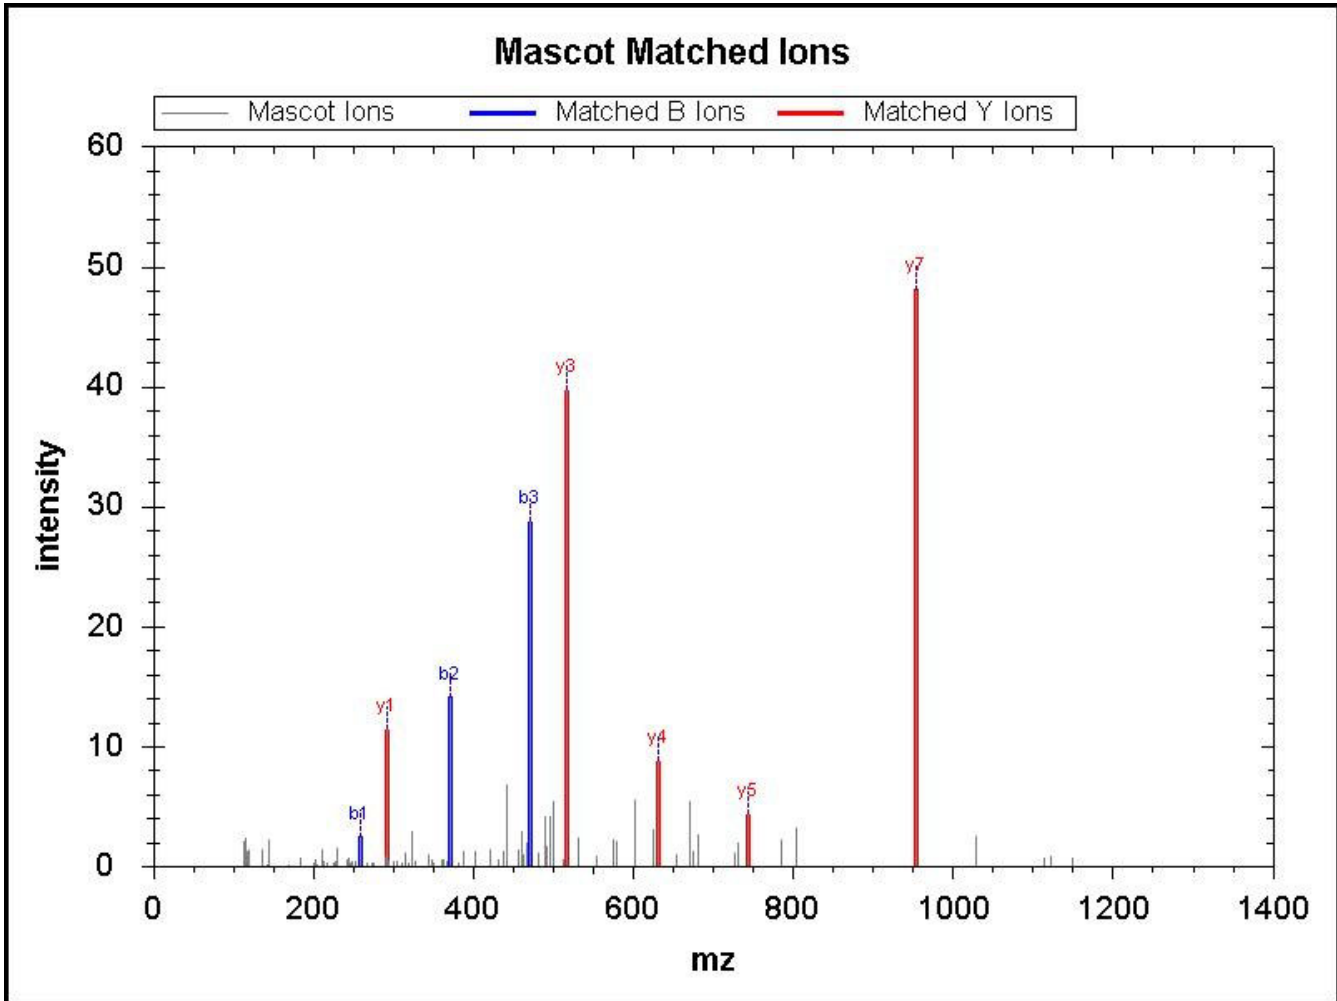

| No | b        | b++    | b0       | b0++   | Seq | y        | y++    | y*       | y*++   | y0       | y0++   | RevNo |
|----|----------|--------|----------|--------|-----|----------|--------|----------|--------|----------|--------|-------|
| 1  | 258.19   | 129.60 |          |        | L   |          |        |          |        |          |        | 10    |
| 2  | 371.28   | 186.14 |          |        | L   | 1,165.77 | 583.39 | 1,148.74 | 574.87 | 1,147.76 | 574.38 | 9     |
| 3  | 470.35   | 235.68 |          |        | V   | 1,052.68 | 526.85 | 1,035.66 | 518.33 | 1,034.67 | 517.84 | 8     |
| 4  | 567.40   | 284.20 |          |        | P   | 953.62   | 477.31 | 936.59   | 468.80 | 935.60   | 468.31 | 7     |
| 5  | 680.48   | 340.74 |          |        | I   | 856.56   | 428.78 | 839.54   | 420.27 | 838.55   | 419.78 | 6     |
| 6  | 793.57   | 397.29 |          |        | L   | 743.48   | 372.24 | 726.45   | 363.73 | 725.47   | 363.24 | 5     |
| 7  | 906.65   | 453.83 |          |        | L   | 630.39   | 315.70 | 613.37   | 307.19 | 612.38   | 306.70 | 4     |
| 8  | 1,003.70 | 502.36 |          |        | P   | 517.31   | 259.16 | 500.28   | 250.65 | 499.30   | 250.15 | 3     |
| 9  | 1,132.75 | 566.88 | 1,114.74 | 557.87 | E   | 420.26   | 210.63 | 403.23   | 202.12 | 402.25   | 201.63 | 2     |
| 10 |          |        |          |        | K   | 291.21   | 146.11 | 274.19   | 137.60 |          |        | 1     |

Query 3927 Hit 1

MS/MS Fragmentation of **NEIKLLR**

Found in **sp|P38935|SMBP2\_HUMAN**, DNA-binding protein SMUBP-2 OS=Homo sapiens GN=IGHMBP2 PE=1 SV=3

Match to Query 3927: 884.6009from(443.3077,2+)

Title: 589: Scan 1363 (rt=40.0265, f=2, i=206) [D:\lab212\membrane\Grace\Joyce\iTRAQ\_27\_1.raw]

Data File:Submitted from 20120508-1(merge) by Mascot Daemon on JOYCE-VAIO

Monoisotopic mass of neutral peptide Mr(calc): 884.6009

Variable modifications:

Ions Score: 36.17 Expect: 0.050

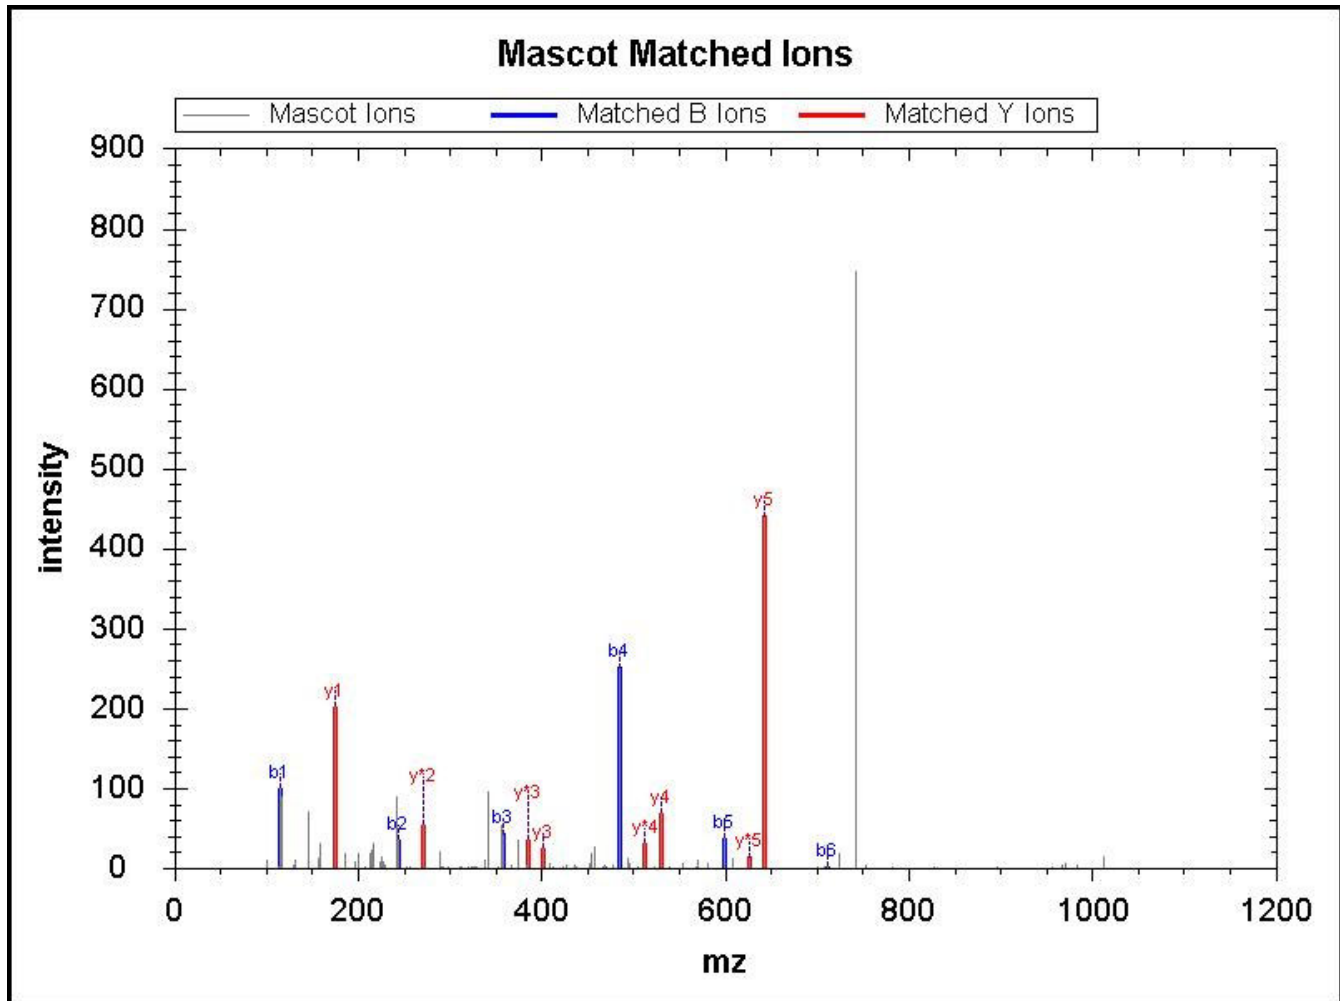

| No | b      | b++    | b*     | b*++   | b0     | b0++   | Seq | y      | y++    | y*     | y*++   | y0     | y0++   | RevNo |
|----|--------|--------|--------|--------|--------|--------|-----|--------|--------|--------|--------|--------|--------|-------|
| 1  | 115.05 | 58.03  | 98.02  | 49.52  |        |        | N   |        |        |        |        |        |        | 7     |
| 2  | 244.09 | 122.55 | 227.07 | 114.04 | 226.08 | 113.54 | E   | 771.51 | 386.26 | 754.48 | 377.74 | 753.50 | 377.25 | 6     |
| 3  | 357.18 | 179.09 | 340.15 | 170.58 | 339.17 | 170.09 | I   | 642.47 | 321.74 | 625.44 | 313.22 |        |        | 5     |
| 4  | 485.27 | 243.14 | 468.25 | 234.63 | 467.26 | 234.13 | K   | 529.38 | 265.19 | 512.36 | 256.68 |        |        | 4     |
| 5  | 598.36 | 299.68 | 581.33 | 291.17 | 580.35 | 290.68 | L   | 401.29 | 201.15 | 384.26 | 192.63 |        |        | 3     |
| 6  | 711.44 | 356.22 | 694.41 | 347.71 | 693.43 | 347.22 | L   | 288.20 | 144.61 | 271.18 | 136.09 |        |        | 2     |
| 7  |        |        |        |        |        |        | R   | 175.12 | 88.06  | 158.09 | 79.55  |        |        | 1     |

Query 7002 Hit 1

MS/MS Fragmentation of **QQIPILK**

Found in **sp|Q9JHW2|NIT2\_MOUSE**, Omega-amidase NIT2 OS=Mus musculus GN=Nit2 PE=1 SV=1

Match to Query 7002: 983.699from(492.8568,2+)

Title: 669: Sum of 2 scans in range 1575 (rt=44.6298, f=4, i=443) to 1576 (rt=44.6552, f=4, i=444)

[D:\lab212\membrane\Grace\Joyce\iTRAQ\_30\_2.raw]

Data File:Submitted from 20120508-1(merge) by Mascot Daemon on JOYCE-VAIO

Monoisotopic mass of neutral peptide Mr(calc): 983.699

Variable modifications:

Q2 :Deamidated (NQ)

K7 :iTRAQ4plex (K)



Ions Score: 36.16 Expect: 0.019

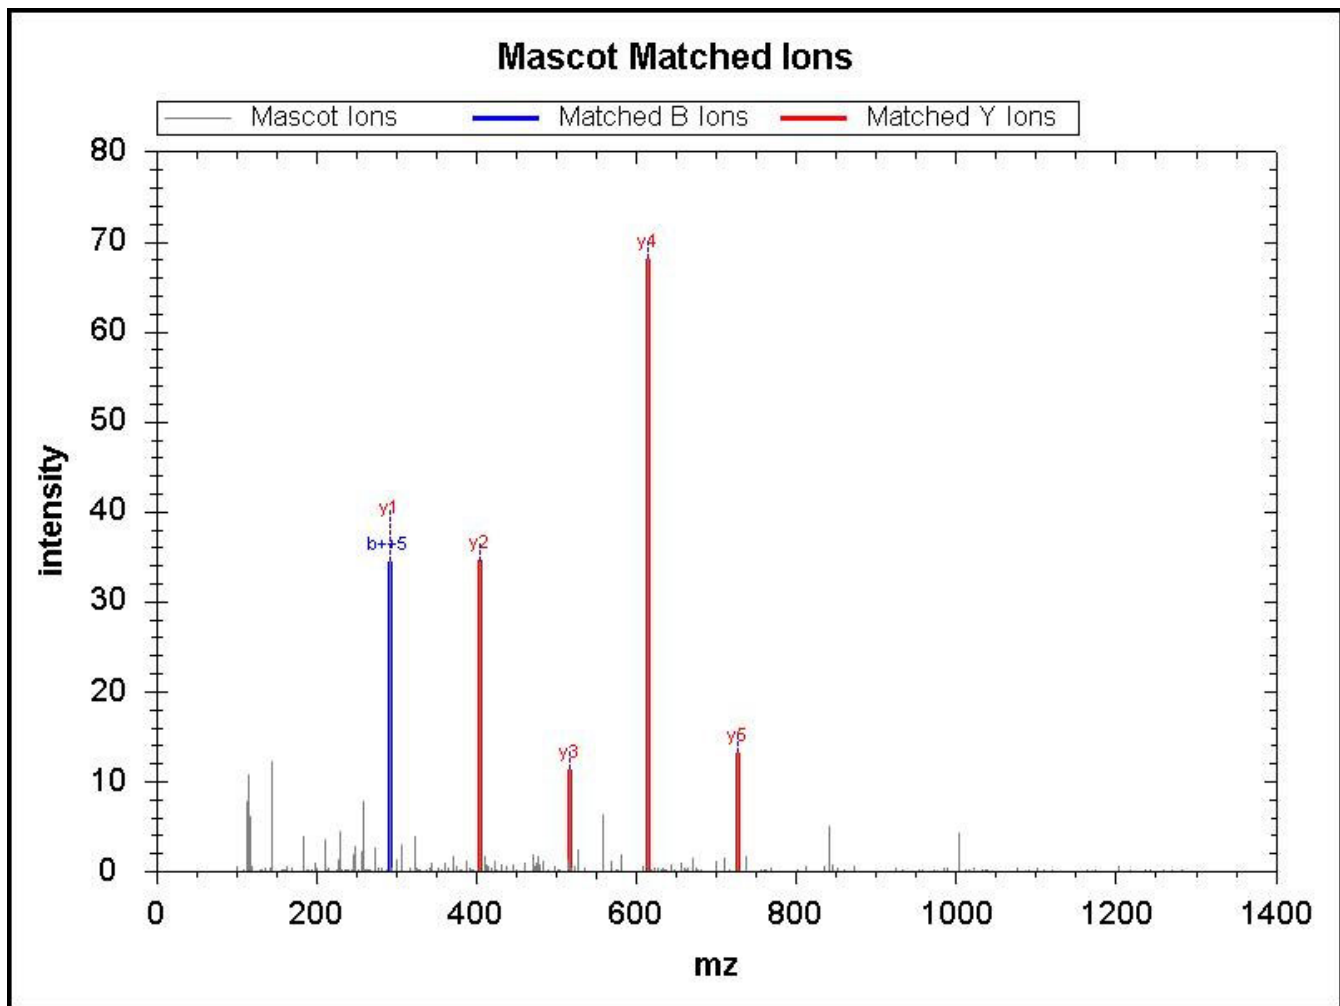

| No | b      | b++    | b*     | b*++   | Seq | y      | y++    | y*     | y*++   | RevNo |
|----|--------|--------|--------|--------|-----|--------|--------|--------|--------|-------|
| 1  | 129.07 | 65.04  | 112.04 | 56.52  | Q   |        |        |        |        | 7     |
| 2  | 258.11 | 129.56 | 241.08 | 121.04 | Q   | 856.56 | 428.78 | 839.54 | 420.27 | 6     |
| 3  | 371.19 | 186.10 | 354.17 | 177.59 | I   | 727.52 | 364.26 | 710.49 | 355.75 | 5     |
| 4  | 468.25 | 234.63 | 451.22 | 226.11 | P   | 614.44 | 307.72 | 597.41 | 299.21 | 4     |
| 5  | 581.33 | 291.17 | 564.30 | 282.66 | I   | 517.38 | 259.20 | 500.36 | 250.68 | 3     |
| 6  | 694.41 | 347.71 | 677.39 | 339.20 | L   | 404.30 | 202.65 | 387.27 | 194.14 | 2     |
| 7  |        |        |        |        | K   | 291.21 | 146.11 | 274.19 | 137.60 | 1     |

Query 78407 Hit 1

MS/MS Fragmentation of VALHALTRPPALLLLAAASSGLR

Found in sp|Q8WUY8|NAT14\_HUMAN, N-acetyltransferase 14 OS=Homo sapiens GN=NAT14 PE=1 SV=1

Match to Query 78407: 2454.496from(614.6313,4+)

Title: 823: Sum of 2 scans in range 2462 (rt=62.526, f=4, i=537) to 2463 (rt=62.5514, f=4, i=538)

[D:\lab212\membrane\GraceJoyce\iTRAQ\_43\_2.raw]

Data File: Submitted from 20120508-1(merge) by Mascot Daemon on JOYCE-VAIO

Monoisotopic mass of neutral peptide Mr(calc): 2454.496

Variable modifications:

Ions Score: 35.48 Expect: 0.020

### Mascot Matched Ions

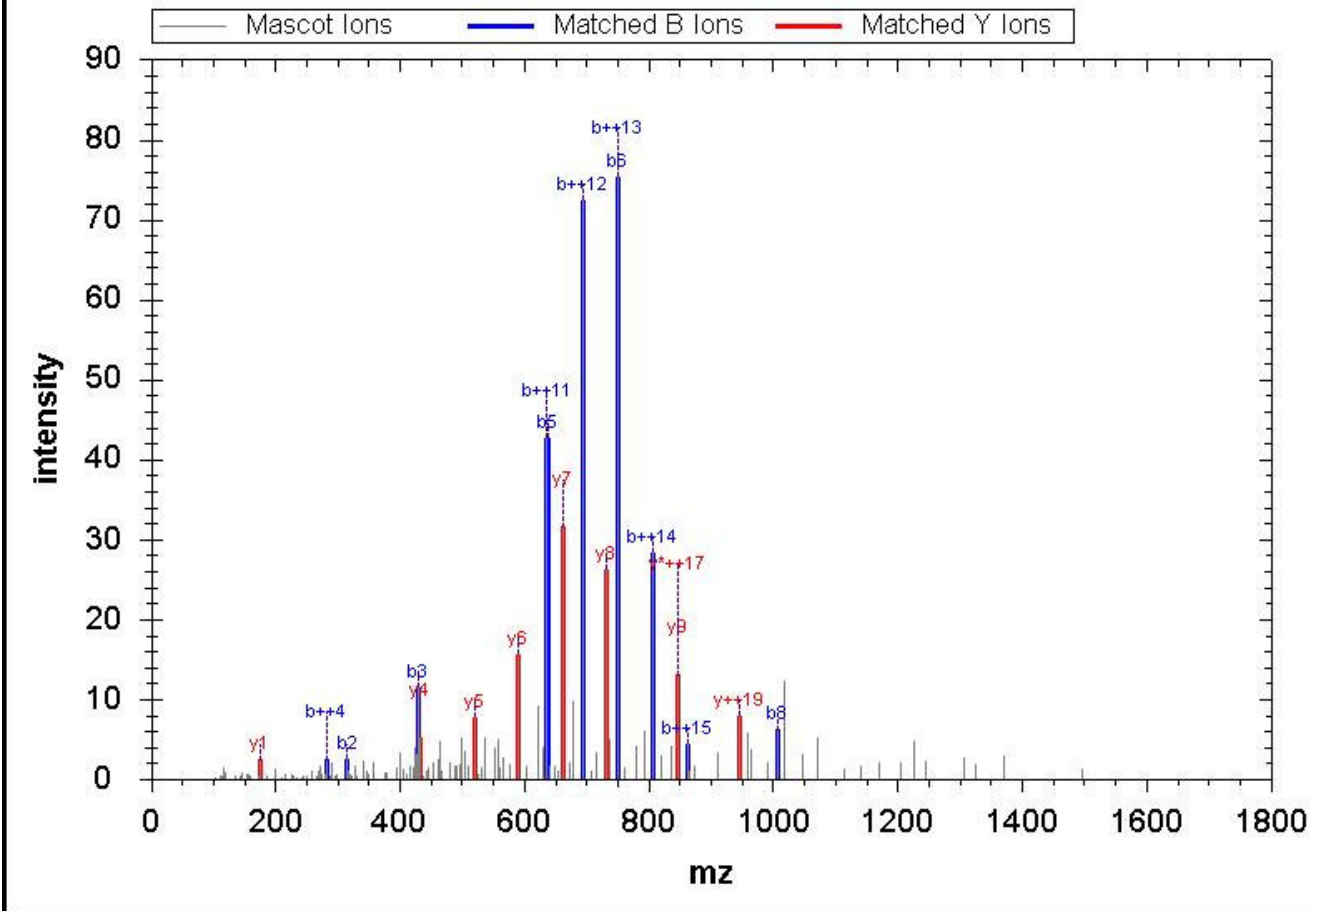

| No | b        | b++      | b*       | b*++     | b0       | b0++     | Seq | y        | y++      | y*       | y*++     | y0       | y0++     | RevNo |
|----|----------|----------|----------|----------|----------|----------|-----|----------|----------|----------|----------|----------|----------|-------|
| 1  | 244.18   | 122.59   |          |          |          |          | V   |          |          |          |          |          |          | 23    |
| 2  | 315.21   | 158.11   |          |          |          |          | A   | 2,212.33 | 1,106.67 | 2,195.30 | 1,098.15 | 2,194.32 | 1,097.66 | 22    |
| 3  | 428.30   | 214.65   |          |          |          |          | L   | 2,141.29 | 1,071.15 | 2,124.27 | 1,062.64 | 2,123.28 | 1,062.14 | 21    |
| 4  | 565.36   | 283.18   |          |          |          |          | H   | 2,028.21 | 1,014.61 | 2,011.18 | 1,006.09 | 2,010.20 | 1,005.60 | 20    |
| 5  | 636.39   | 318.70   |          |          |          |          | A   | 1,891.15 | 946.08   | 1,874.12 | 937.56   | 1,873.14 | 937.07   | 19    |
| 6  | 749.48   | 375.24   |          |          |          |          | L   | 1,820.11 | 910.56   | 1,803.09 | 902.05   | 1,802.10 | 901.55   | 18    |
| 7  | 850.53   | 425.77   |          |          | 832.52   | 416.76   | T   | 1,707.03 | 854.02   | 1,690.00 | 845.50   | 1,689.02 | 845.01   | 17    |
| 8  | 1,006.63 | 503.82   | 989.60   | 495.30   | 988.62   | 494.81   | R   | 1,605.98 | 803.49   | 1,588.95 | 794.98   | 1,587.97 | 794.49   | 16    |
| 9  | 1,103.68 | 552.34   | 1,086.65 | 543.83   | 1,085.67 | 543.34   | P   | 1,449.88 | 725.44   | 1,432.85 | 716.93   | 1,431.87 | 716.44   | 15    |
| 10 | 1,200.73 | 600.87   | 1,183.71 | 592.36   | 1,182.72 | 591.86   | P   | 1,352.83 | 676.92   | 1,335.80 | 668.40   | 1,334.82 | 667.91   | 14    |
| 11 | 1,271.77 | 636.39   | 1,254.74 | 627.88   | 1,253.76 | 627.38   | A   | 1,255.77 | 628.39   | 1,238.75 | 619.88   | 1,237.76 | 619.38   | 13    |
| 12 | 1,384.85 | 692.93   | 1,367.83 | 684.42   | 1,366.84 | 683.93   | L   | 1,184.74 | 592.87   | 1,167.71 | 584.36   | 1,166.73 | 583.87   | 12    |
| 13 | 1,497.94 | 749.47   | 1,480.91 | 740.96   | 1,479.93 | 740.47   | L   | 1,071.65 | 536.33   | 1,054.63 | 527.82   | 1,053.64 | 527.32   | 11    |
| 14 | 1,611.02 | 806.02   | 1,594.00 | 797.50   | 1,593.01 | 797.01   | L   | 958.57   | 479.79   | 941.54   | 471.27   | 940.56   | 470.78   | 10    |
| 15 | 1,724.11 | 862.56   | 1,707.08 | 854.04   | 1,706.10 | 853.55   | L   | 845.48   | 423.25   | 828.46   | 414.73   | 827.47   | 414.24   | 9     |
| 16 | 1,795.14 | 898.08   | 1,778.12 | 889.56   | 1,777.13 | 889.07   | A   | 732.40   | 366.70   | 715.37   | 358.19   | 714.39   | 357.70   | 8     |
| 17 | 1,866.18 | 933.59   | 1,849.15 | 925.08   | 1,848.17 | 924.59   | A   | 661.36   | 331.18   | 644.34   | 322.67   | 643.35   | 322.18   | 7     |
| 18 | 1,937.22 | 969.11   | 1,920.19 | 960.60   | 1,919.21 | 960.11   | A   | 590.33   | 295.67   | 573.30   | 287.15   | 572.32   | 286.66   | 6     |
| 19 | 2,024.25 | 1,012.63 | 2,007.22 | 1,004.12 | 2,006.24 | 1,003.62 | S   | 519.29   | 260.15   | 502.26   | 251.63   | 501.28   | 251.14   | 5     |
| 20 | 2,111.28 | 1,056.14 | 2,094.26 | 1,047.63 | 2,093.27 | 1,047.14 | S   | 432.26   | 216.63   | 415.23   | 208.12   | 414.25   | 207.63   | 4     |
| 21 | 2,168.30 | 1,084.66 | 2,151.28 | 1,076.14 | 2,150.29 | 1,075.65 | G   | 345.22   | 173.12   | 328.20   | 164.60   |          |          | 3     |
| 22 | 2,281.39 | 1,141.20 | 2,264.36 | 1,132.68 | 2,263.38 | 1,132.19 | L   | 288.20   | 144.61   | 271.18   | 136.09   |          |          | 2     |
| 23 |          |          |          |          |          |          | R   | 175.12   | 88.06    | 158.09   | 79.55    |          |          | 1     |

Query 78756 Hit 1

MS/MS Fragmentation of **LSKPTLENLTPVVL RPEIR**

Found in **sp|P55211|CASP9\_HUMAN**, Caspase-9 OS=Homo sapiens GN=CASP9 PE=1 SV=3

Match to Query 78756: 2462.485from(616.6287,4+)

Title: 530: Scan 1783 (rt=47.6347, f=3, i=206) [D:\lab212\membrane\Grace\Joyce\iTRAQ\_46\_1.raw]

Data File:Submitted from 20120508-1(merge) by Mascot Daemon on JOYCE-VAIO

Monoisotopic mass of neutral peptide Mr(calc): 2462.485

Variable modifications:

K3 iTRAQ4plex (K)

Ions Score: 35.28 Expect: 0.028

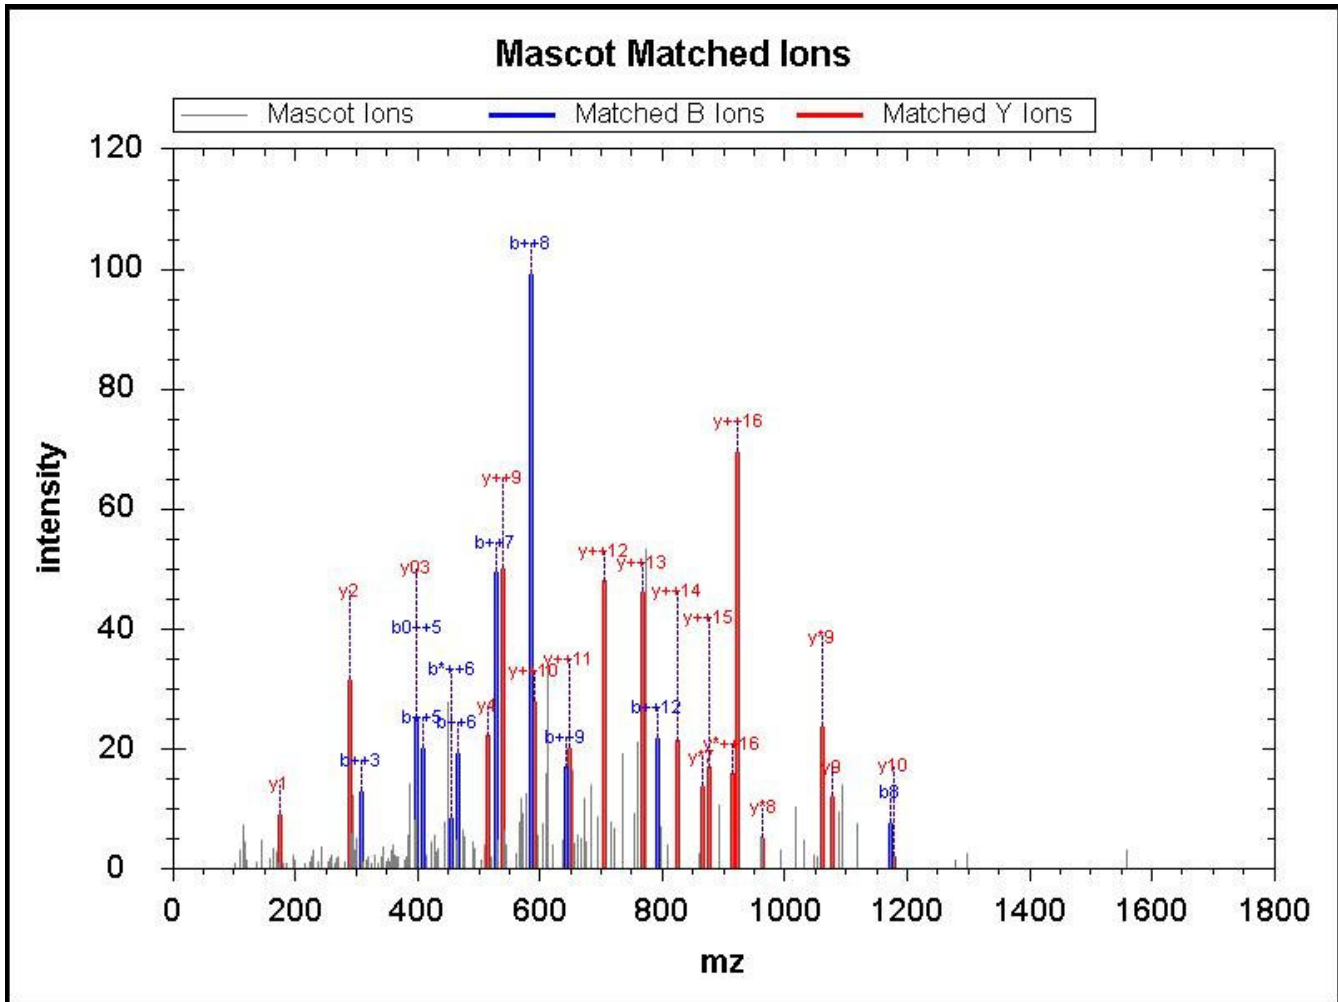

| No | b               | b++           | b*       | b*++          | b0       | b0++          | Seq | y               | y++           | y*              | y*++          | y0       | y0++     | RevNo |
|----|-----------------|---------------|----------|---------------|----------|---------------|-----|-----------------|---------------|-----------------|---------------|----------|----------|-------|
| 1  | 258.19          | 129.60        |          |               |          |               | L   |                 |               |                 |               |          |          | 19    |
| 2  | 345.23          | 173.12        |          |               | 327.21   | 164.11        | S   | 2,206.30        | 1,103.66      | 2,189.28        | 1,095.14      | 2,188.29 | 1,094.65 | 18    |
| 3  | 617.42          | <b>309.21</b> | 600.40   | 300.70        | 599.41   | 300.21        | K   | 2,119.27        | 1,060.14      | 2,102.25        | 1,051.63      | 2,101.26 | 1,051.13 | 17    |
| 4  | 714.48          | 357.74        | 697.45   | 349.23        | 696.46   | 348.74        | P   | 1,847.08        | <b>924.04</b> | 1,830.05        | <b>915.53</b> | 1,829.06 | 915.04   | 16    |
| 5  | 815.52          | <b>408.27</b> | 798.50   | 399.75        | 797.51   | <b>399.26</b> | T   | 1,750.02        | <b>875.51</b> | 1,733.00        | 867.00        | 1,732.01 | 866.51   | 15    |
| 6  | 928.61          | <b>464.81</b> | 911.58   | <b>456.29</b> | 910.60   | 455.80        | L   | 1,648.97        | <b>824.99</b> | 1,631.95        | 816.48        | 1,630.96 | 815.99   | 14    |
| 7  | 1,057.65        | <b>529.33</b> | 1,040.62 | 520.82        | 1,039.64 | 520.32        | E   | 1,535.89        | <b>768.45</b> | 1,518.86        | 759.94        | 1,517.88 | 759.44   | 13    |
| 8  | <b>1,171.69</b> | <b>586.35</b> | 1,154.67 | 577.84        | 1,153.68 | 577.34        | N   | 1,406.85        | <b>703.93</b> | 1,389.82        | 695.41        | 1,388.84 | 694.92   | 12    |
| 9  | 1,284.78        | <b>642.89</b> | 1,267.75 | 634.38        | 1,266.77 | 633.89        | L   | 1,292.80        | <b>646.91</b> | 1,275.78        | 638.39        | 1,274.79 | 637.90   | 11    |
| 10 | 1,385.82        | 693.42        | 1,368.80 | 684.90        | 1,367.81 | 684.41        | T   | <b>1,179.72</b> | <b>590.36</b> | 1,162.69        | 581.85        | 1,161.71 | 581.36   | 10    |
| 11 | 1,482.88        | 741.94        | 1,465.85 | 733.43        | 1,464.87 | 732.94        | P   | <b>1,078.67</b> | <b>539.84</b> | <b>1,061.65</b> | 531.33        | 1,060.66 | 530.83   | 9     |
| 12 | 1,581.95        | <b>791.48</b> | 1,564.92 | 782.96        | 1,563.93 | 782.47        | V   | 981.62          | 491.31        | <b>964.59</b>   | 482.80        | 963.61   | 482.31   | 8     |
| 13 | 1,681.01        | 841.01        | 1,663.99 | 832.50        | 1,663.00 | 832.01        | V   | 882.55          | 441.78        | <b>865.53</b>   | 433.27        | 864.54   | 432.77   | 7     |
| 14 | 1,794.10        | 897.55        | 1,777.07 | 889.04        | 1,776.09 | 888.55        | L   | 783.48          | 392.25        | 766.46          | 383.73        | 765.47   | 383.24   | 6     |

|    |          |          |          |          |          |          |   |        |        |        |        |        |        |   |
|----|----------|----------|----------|----------|----------|----------|---|--------|--------|--------|--------|--------|--------|---|
| 15 | 1,950.20 | 975.60   | 1,933.17 | 967.09   | 1,932.19 | 966.60   | R | 670.40 | 335.70 | 653.37 | 327.19 | 652.39 | 326.70 | 5 |
| 16 | 2,047.25 | 1,024.13 | 2,030.23 | 1,015.62 | 2,029.24 | 1,015.12 | P | 514.30 | 257.65 | 497.27 | 249.14 | 496.29 | 248.65 | 4 |
| 17 | 2,176.29 | 1,088.65 | 2,159.27 | 1,080.14 | 2,158.28 | 1,079.65 | E | 417.25 | 209.13 | 400.22 | 200.61 | 399.24 | 200.12 | 3 |
| 18 | 2,289.38 | 1,145.19 | 2,272.35 | 1,136.68 | 2,271.37 | 1,136.19 | I | 288.20 | 144.61 | 271.18 | 136.09 |        |        | 2 |
| 19 |          |          |          |          |          |          | R | 175.12 | 88.06  | 158.09 | 79.55  |        |        | 1 |

Query 69648 Hit 1

MS/MS Fragmentation of **LQEQLPELLEIHKPK**

Found in [sp|Q14746|COG2\\_HUMAN](#), Conserved oligomeric Golgi complex subunit 2 OS=Homo sapiens GN=COG2 PE=1 SV=1  
Match to Query 69648: 2222.364from(741.7953,3+)

Title: 1011: Sum of 2 scans in range 2182 (rt=58.8426, f=4, i=675) to 2183 (rt=58.868, f=4, i=676)

[D:\lab212\membrane\Grace\Joyce\iTRAQ\_40\_1.raw]

Data File: Submitted from 20120508-1(merge) by Mascot Daemon on JOYCE-VAIO

Monoisotopic mass of neutral peptide Mr(calc): 2222.364

Variable modifications:

K13 iTRAQ4plex (K)

K15 iTRAQ4plex (K)

Ions Score: 33.89 Expect: 0.038

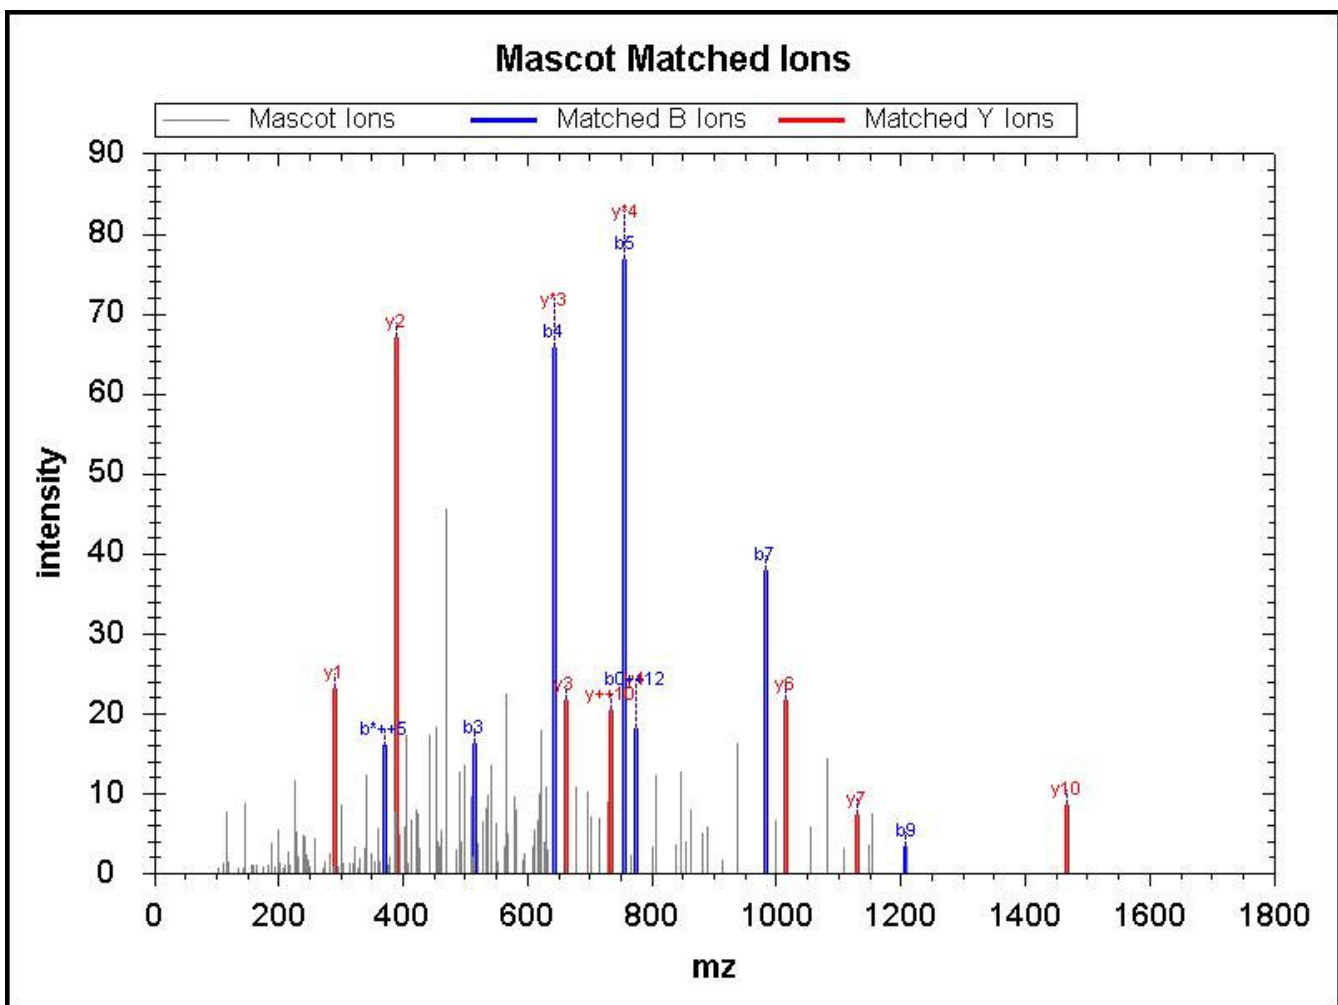

| No | b      | b++    | b*     | b*++   | b0     | b0++   | Seq | y        | y++    | y*       | y*++   | y0       | y0++   | RevNo |
|----|--------|--------|--------|--------|--------|--------|-----|----------|--------|----------|--------|----------|--------|-------|
| 1  | 258.19 | 129.60 |        |        |        |        | L   |          |        |          |        |          |        | 15    |
| 2  | 386.25 | 193.63 | 369.23 | 185.12 |        |        | Q   | 1,966.18 | 983.60 | 1,949.16 | 975.08 | 1,948.17 | 974.59 | 14    |
| 3  | 515.29 | 258.15 | 498.27 | 249.64 | 497.28 | 249.15 | E   | 1,838.12 | 919.57 | 1,821.10 | 911.05 | 1,820.11 | 910.56 | 13    |
| 4  | 643.35 | 322.18 | 626.33 | 313.67 | 625.34 | 313.17 | Q   | 1,709.08 | 855.04 | 1,692.06 | 846.53 | 1,691.07 | 846.04 | 12    |
| 5  | 756.44 | 378.72 | 739.41 | 370.21 | 738.43 | 369.72 | L   | 1,581.02 | 791.02 | 1,564.00 | 782.50 | 1,563.01 | 782.01 | 11    |
| 6  | 853.49 | 427.25 | 836.46 | 418.74 | 835.48 | 418.24 | P   | 1,467.94 | 734.47 | 1,450.91 | 725.96 | 1,449.93 | 725.47 | 10    |
| 7  | 982.53 | 491.77 | 965.51 | 483.26 | 964.52 | 482.76 | E   | 1,370.89 | 685.95 | 1,353.86 | 677.43 | 1,352.88 | 676.94 | 9     |

|    |          |        |          |        |          |        |   |          |        |          |        |          |        |   |
|----|----------|--------|----------|--------|----------|--------|---|----------|--------|----------|--------|----------|--------|---|
| 8  | 1,095.62 | 548.31 | 1,078.59 | 539.80 | 1,077.61 | 539.31 | L | 1,241.84 | 621.43 | 1,224.82 | 612.91 | 1,223.83 | 612.42 | 8 |
| 9  | 1,208.70 | 604.85 | 1,191.67 | 596.34 | 1,190.69 | 595.85 | L | 1,128.76 | 564.88 | 1,111.73 | 556.37 | 1,110.75 | 555.88 | 7 |
| 10 | 1,337.74 | 669.38 | 1,320.72 | 660.86 | 1,319.73 | 660.37 | E | 1,015.68 | 508.34 | 998.65   | 499.83 | 997.66   | 499.34 | 6 |
| 11 | 1,450.83 | 725.92 | 1,433.80 | 717.40 | 1,432.82 | 716.91 | I | 886.63   | 443.82 | 869.61   | 435.31 |          |        | 5 |
| 12 | 1,563.91 | 782.46 | 1,546.89 | 773.95 | 1,545.90 | 773.45 | I | 773.55   | 387.28 | 756.52   | 378.76 |          |        | 4 |
| 13 | 1,836.11 | 918.56 | 1,819.08 | 910.04 | 1,818.10 | 909.55 | K | 660.46   | 330.74 | 643.44   | 322.22 |          |        | 3 |
| 14 | 1,933.16 | 967.08 | 1,916.13 | 958.57 | 1,915.15 | 958.08 | P | 388.27   | 194.64 | 371.24   | 186.12 |          |        | 2 |
| 15 |          |        |          |        |          |        | K | 291.21   | 146.11 | 274.19   | 137.60 |          |        | 1 |

Query 55697 Hit 1

MS/MS Fragmentation of **AKPLLLQLPIGEAK**

Found in **sp|Q969S9|RRF2M\_HUMAN**, Ribosome-releasing factor 2

Match to Query 55697: 1922.233from(641.7517,3+)

Title: 537: Sum of 2 scans in range 1860 (rt=48.9628, f=4, i=343) to 1861 (rt=48.9882, f=4, i=344)

[D:\lab212\membrane\GraceJoyce\iTRAQ\_43\_2.raw]

Data File:Submitted from 20120508-1(merge) by Mascot Daemon on JOYCE-VAIO

Monoisotopic mass of neutral peptide Mr(calc): 1922.233

Variable modifications:

K2 iTRAQ4plex (K)

K14 iTRAQ4plex (K)

Ions Score: 31.06 Expect: 0.040

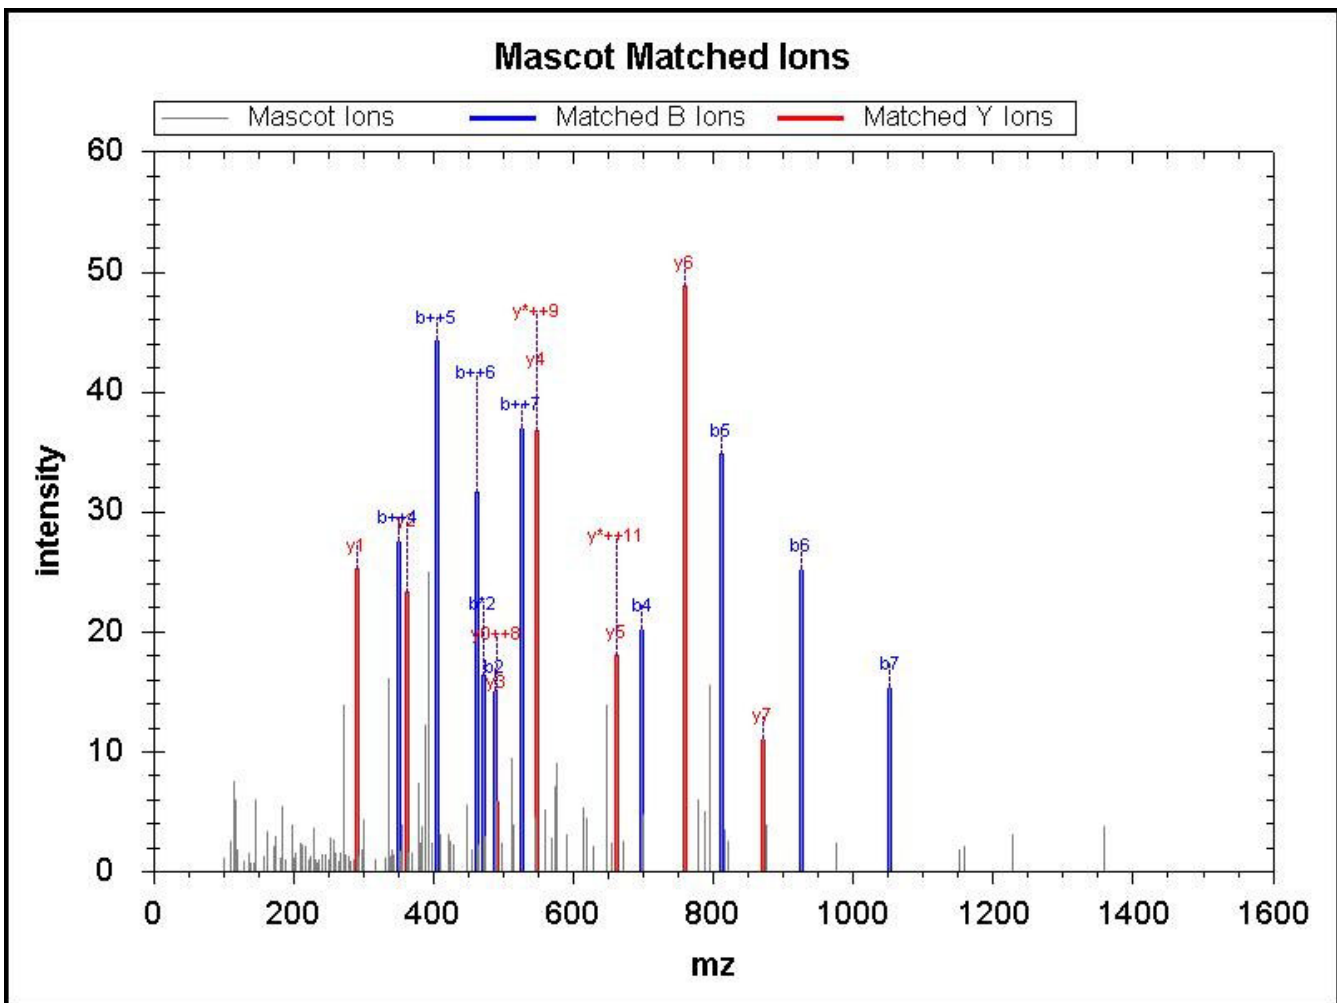

| No | b      | b++    | b*     | b*++   | b0 | b0++ | Seq | y        | y++    | y*       | y*++   | y0       | y0++   | RevNo |
|----|--------|--------|--------|--------|----|------|-----|----------|--------|----------|--------|----------|--------|-------|
| 1  | 216.15 | 108.58 |        |        |    |      | A   |          |        |          |        |          |        | 14    |
| 2  | 488.34 | 244.68 | 471.32 | 236.16 |    |      | K   | 1,708.10 | 854.55 | 1,691.07 | 846.04 | 1,690.09 | 845.55 | 13    |
| 3  | 585.40 | 293.20 | 568.37 | 284.69 |    |      | P   | 1,435.90 | 718.45 | 1,418.87 | 709.94 | 1,417.89 | 709.45 | 12    |
| 4  | 698.48 | 349.74 | 681.45 | 341.23 |    |      | L   | 1,338.85 | 669.93 | 1,321.82 | 661.41 | 1,320.84 | 660.92 | 11    |

|    |          |        |          |        |          |        |   |          |        |          |        |          |        |    |
|----|----------|--------|----------|--------|----------|--------|---|----------|--------|----------|--------|----------|--------|----|
| 5  | 811.56   | 406.29 | 794.54   | 397.77 |          |        | L | 1,225.76 | 613.39 | 1,208.74 | 604.87 | 1,207.75 | 604.38 | 10 |
| 6  | 924.65   | 462.83 | 907.62   | 454.31 |          |        | L | 1,112.68 | 556.84 | 1,095.65 | 548.33 | 1,094.67 | 547.84 | 9  |
| 7  | 1,052.71 | 526.86 | 1,035.68 | 518.34 |          |        | Q | 999.60   | 500.30 | 982.57   | 491.79 | 981.58   | 491.30 | 8  |
| 8  | 1,165.79 | 583.40 | 1,148.76 | 574.89 |          |        | L | 871.54   | 436.27 | 854.51   | 427.76 | 853.53   | 427.27 | 7  |
| 9  | 1,262.84 | 631.93 | 1,245.82 | 623.41 |          |        | P | 758.45   | 379.73 | 741.43   | 371.22 | 740.44   | 370.72 | 6  |
| 10 | 1,375.93 | 688.47 | 1,358.90 | 679.95 |          |        | I | 661.40   | 331.20 | 644.37   | 322.69 | 643.39   | 322.20 | 5  |
| 11 | 1,432.95 | 716.98 | 1,415.92 | 708.47 |          |        | G | 548.32   | 274.66 | 531.29   | 266.15 | 530.31   | 265.66 | 4  |
| 12 | 1,561.99 | 781.50 | 1,544.97 | 772.99 | 1,543.98 | 772.49 | E | 491.29   | 246.15 | 474.27   | 237.64 | 473.28   | 237.15 | 3  |
| 13 | 1,633.03 | 817.02 | 1,616.00 | 808.51 | 1,615.02 | 808.01 | A | 362.25   | 181.63 | 345.23   | 173.12 |          |        | 2  |
| 14 |          |        |          |        |          |        | K | 291.21   | 146.11 | 274.19   | 137.60 |          |        | 1  |
