# Supplementary material for: Quantitative Proteomic Analysis of Human Lung Tumor Xenografts Treated with the Ectopic ATP Synthase Inhibitor Citreoviridin
Source: PubMed Central journal article supplement (PMC3749231; doi:10.1371/journal.pone.0070642), 2013-08-21
Supplement: pone.0070642.s021.pdf [file pone.0070642.s021.pdf]

Spectra S4: The information of single-peptide-based protein identifications in the large-scale experiment (part 2).

Query 77577 Hit 1

MS/MS Fragmentation of **LGAGYGLLSEAELEVVPIAK**

Found in **sp|Q15642|CIP4\_HUMAN**, Cdc42-interacting protein 4 OS=Homo sapiens GN=TRIP10 PE=1 SV=3

Match to Query 77577: 2429.4from(810.8073,3+)

Title: 1113: Scan 2567 (rt=66.6333, f=2, i=406) [D:\lab212\membrane\Grace\Joyce\iTRAQ\_24\_1.raw]

Data File: Submitted from 20120508-1(merge) by Mascot Daemon on JOYCE-VAIO

Monoisotopic mass of neutral peptide Mr(calc): 2429.4

Variable modifications:

K21 iTRAQ4plex (K)

Ions Score: 51.41 Expect: 0.002

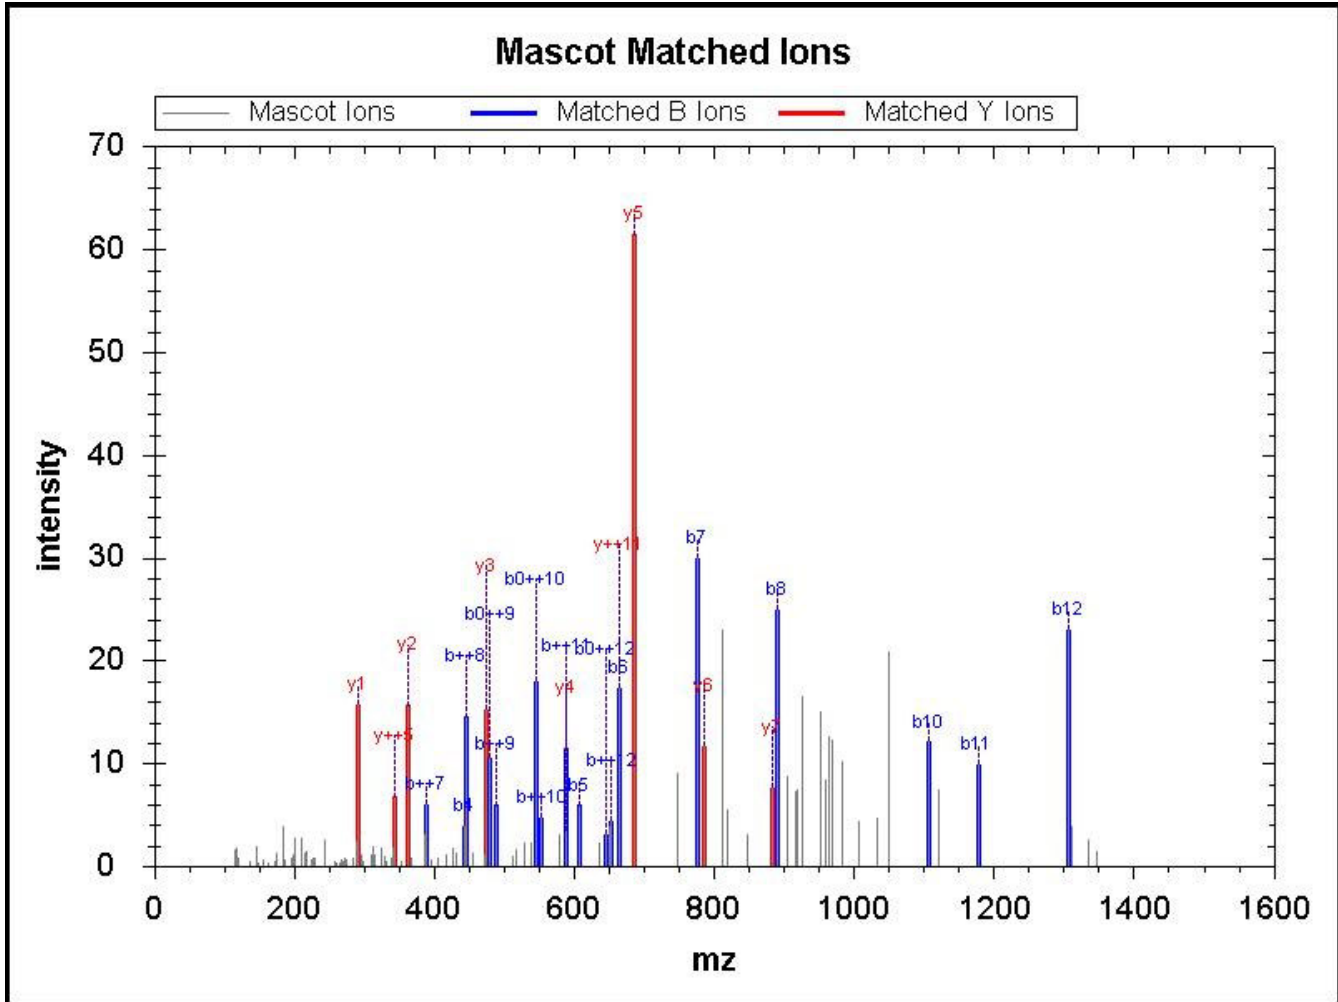

| No | b        | b++    | b0       | b0++   | Seq | y        | y++      | y*       | y*++     | y0       | y0++     | RevNo |
|----|----------|--------|----------|--------|-----|----------|----------|----------|----------|----------|----------|-------|
| 1  | 258.19   | 129.60 |          |        | L   |          |          |          |          |          |          | 21    |
| 2  | 315.21   | 158.11 |          |        | G   | 2,173.22 | 1,087.12 | 2,156.20 | 1,078.60 | 2,155.21 | 1,078.11 | 20    |
| 3  | 386.25   | 193.63 |          |        | A   | 2,116.20 | 1,058.60 | 2,099.18 | 1,050.09 | 2,098.19 | 1,049.60 | 19    |
| 4  | 443.27   | 222.14 |          |        | G   | 2,045.17 | 1,023.09 | 2,028.14 | 1,014.57 | 2,027.15 | 1,014.08 | 18    |
| 5  | 606.34   | 303.67 |          |        | Y   | 1,988.14 | 994.58   | 1,971.12 | 986.06   | 1,970.13 | 985.57   | 17    |
| 6  | 663.36   | 332.18 |          |        | G   | 1,825.08 | 913.04   | 1,808.05 | 904.53   | 1,807.07 | 904.04   | 16    |
| 7  | 776.44   | 388.72 |          |        | L   | 1,768.06 | 884.53   | 1,751.03 | 876.02   | 1,750.05 | 875.53   | 15    |
| 8  | 889.53   | 445.27 |          |        | L   | 1,654.97 | 827.99   | 1,637.95 | 819.48   | 1,636.96 | 818.99   | 14    |
| 9  | 976.56   | 488.78 | 958.55   | 479.78 | S   | 1,541.89 | 771.45   | 1,524.86 | 762.94   | 1,523.88 | 762.44   | 13    |
| 10 | 1,105.60 | 553.30 | 1,087.59 | 544.30 | E   | 1,454.86 | 727.93   | 1,437.83 | 719.42   | 1,436.85 | 718.93   | 12    |
| 11 | 1,176.64 | 588.82 | 1,158.63 | 579.82 | A   | 1,325.82 | 663.41   | 1,308.79 | 654.90   | 1,307.81 | 654.41   | 11    |
| 12 | 1,305.68 | 653.34 | 1,287.67 | 644.34 | E   | 1,254.78 | 627.89   | 1,237.75 | 619.38   | 1,236.77 | 618.89   | 10    |
| 13 | 1,418.76 | 709.89 | 1,400.75 | 700.88 | L   | 1,125.74 | 563.37   | 1,108.71 | 554.86   | 1,107.73 | 554.37   | 9     |
| 14 | 1,547.81 | 774.41 | 1,529.80 | 765.40 | E   | 1,012.65 | 506.83   | 995.63   | 498.32   | 994.64   | 497.82   | 8     |

|    |          |          |          |          |   |        |        |        |        |  |  |  |   |
|----|----------|----------|----------|----------|---|--------|--------|--------|--------|--|--|--|---|
| 15 | 1,646.88 | 823.94   | 1,628.87 | 814.94   | V | 883.61 | 442.31 | 866.58 | 433.80 |  |  |  | 7 |
| 16 | 1,745.94 | 873.48   | 1,727.93 | 864.47   | V | 784.54 | 392.77 | 767.51 | 384.26 |  |  |  | 6 |
| 17 | 1,843.00 | 922.00   | 1,824.99 | 913.00   | P | 685.47 | 343.24 | 668.45 | 334.73 |  |  |  | 5 |
| 18 | 1,956.08 | 978.54   | 1,938.07 | 969.54   | I | 588.42 | 294.71 | 571.39 | 286.20 |  |  |  | 4 |
| 19 | 2,069.17 | 1,035.09 | 2,051.15 | 1,026.08 | I | 475.34 | 238.17 | 458.31 | 229.66 |  |  |  | 3 |
| 20 | 2,140.20 | 1,070.60 | 2,122.19 | 1,061.60 | A | 362.25 | 181.63 | 345.23 | 173.12 |  |  |  | 2 |
| 21 |          |          |          |          | K | 291.21 | 146.11 | 274.19 | 137.60 |  |  |  | 1 |

Query 69518 Hit 1

MS/MS Fragmentation of **KVSQEILELLNTTTAK**

Found in **sp|Q86U44|MTA70\_HUMAN**, N6-adenosine-methyltransferase 70 kDa subunit OS=Homo sapiens GN=METTL3 PE=1 SV=2

Match to Query 69518: 2219.313from(740.7783,3+)

Title: 915: Scan 1987 (rt=54.3811, f=3, i=309) [D:\lab212\membrane\Grace\Joyce\iTRAQ\_45\_2.raw]

Data File: Submitted from 20120508-1(merge) by Mascot Daemon on JOYCE-VAIO

Monoisotopic mass of neutral peptide Mr(calc): 2219.313

Variable modifications:

K1 iTRAQ4plex (K)

K16 iTRAQ4plex (K)

Ions Score: 51.35 Expect: 0.002

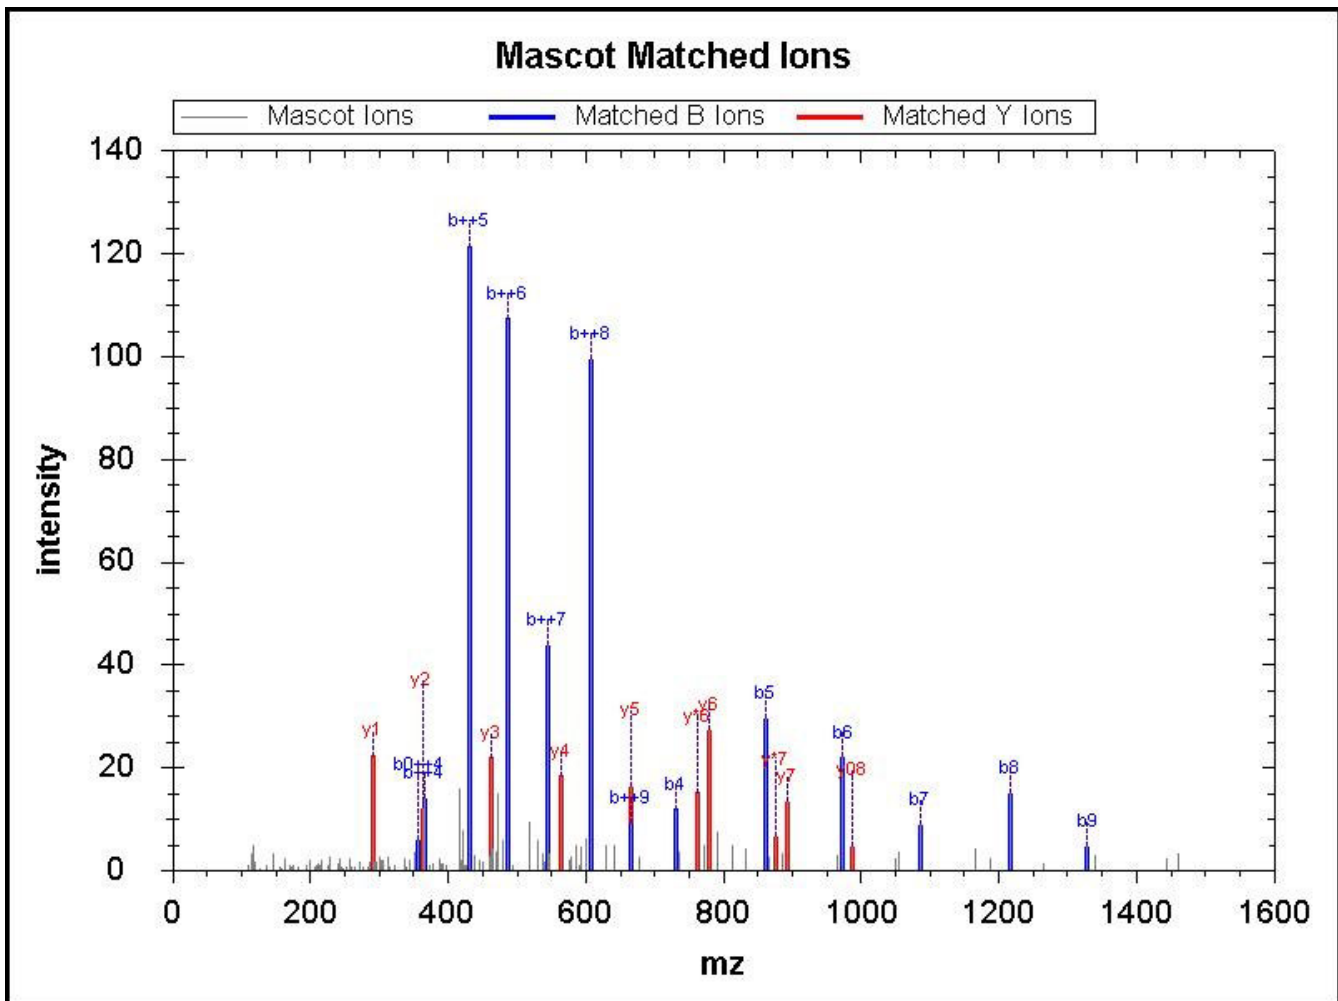

| No | b      | b++    | b*     | b*++   | b0     | b0++   | Seq | y        | y++    | y*       | y*++   | y0       | y0++   | RevNo |
|----|--------|--------|--------|--------|--------|--------|-----|----------|--------|----------|--------|----------|--------|-------|
| 1  | 417.31 | 209.16 | 400.28 | 200.64 |        |        | K   |          |        |          |        |          |        | 16    |
| 2  | 516.37 | 258.69 | 499.35 | 250.18 |        |        | V   | 1,804.02 | 902.51 | 1,786.99 | 894.00 | 1,786.01 | 893.51 | 15    |
| 3  | 603.41 | 302.21 | 586.38 | 293.69 | 585.40 | 293.20 | S   | 1,704.95 | 852.98 | 1,687.92 | 844.47 | 1,686.94 | 843.97 | 14    |
| 4  | 731.47 | 366.24 | 714.44 | 357.72 | 713.45 | 357.23 | Q   | 1,617.92 | 809.46 | 1,600.89 | 800.95 | 1,599.91 | 800.46 | 13    |
| 5  | 860.51 | 430.76 | 843.48 | 422.24 | 842.50 | 421.75 | E   | 1,489.86 | 745.43 | 1,472.83 | 736.92 | 1,471.85 | 736.43 | 12    |

|    |          |        |          |        |          |        |   |          |        |          |        |          |        |    |
|----|----------|--------|----------|--------|----------|--------|---|----------|--------|----------|--------|----------|--------|----|
| 6  | 973.59   | 487.30 | 956.57   | 478.79 | 955.58   | 478.29 | I | 1,360.82 | 680.91 | 1,343.79 | 672.40 | 1,342.81 | 671.91 | 11 |
| 7  | 1,086.68 | 543.84 | 1,069.65 | 535.33 | 1,068.67 | 534.84 | L | 1,247.73 | 624.37 | 1,230.71 | 615.86 | 1,229.72 | 615.36 | 10 |
| 8  | 1,215.72 | 608.36 | 1,198.69 | 599.85 | 1,197.71 | 599.36 | E | 1,134.65 | 567.83 | 1,117.62 | 559.31 | 1,116.64 | 558.82 | 9  |
| 9  | 1,328.80 | 664.91 | 1,311.78 | 656.39 | 1,310.79 | 655.90 | L | 1,005.61 | 503.31 | 988.58   | 494.79 | 987.60   | 494.30 | 8  |
| 10 | 1,441.89 | 721.45 | 1,424.86 | 712.93 | 1,423.88 | 712.44 | L | 892.52   | 446.76 | 875.50   | 438.25 | 874.51   | 437.76 | 7  |
| 11 | 1,555.93 | 778.47 | 1,538.90 | 769.96 | 1,537.92 | 769.46 | N | 779.44   | 390.22 | 762.41   | 381.71 | 761.43   | 381.22 | 6  |
| 12 | 1,656.98 | 828.99 | 1,639.95 | 820.48 | 1,638.97 | 819.99 | T | 665.39   | 333.20 | 648.37   | 324.69 | 647.38   | 324.20 | 5  |
| 13 | 1,758.03 | 879.52 | 1,741.00 | 871.00 | 1,740.01 | 870.51 | T | 564.35   | 282.68 | 547.32   | 274.16 | 546.34   | 273.67 | 4  |
| 14 | 1,859.07 | 930.04 | 1,842.05 | 921.53 | 1,841.06 | 921.03 | T | 463.30   | 232.15 | 446.27   | 223.64 | 445.29   | 223.15 | 3  |
| 15 | 1,930.11 | 965.56 | 1,913.08 | 957.05 | 1,912.10 | 956.55 | A | 362.25   | 181.63 | 345.23   | 173.12 |          |        | 2  |
| 16 |          |        |          |        |          |        | K | 291.21   | 146.11 | 274.19   | 137.60 |          |        | 1  |

Query 65714 Hit 1

MS/MS Fragmentation of **AFVEFLTDEIKEEK**

Found in **sp|O35658|C1QBP\_MOUSE**, Complement component 1 Q subcomponent-binding protein

Match to Query 65714: 2129.167from(710.7294,3+)

Title: 945: Scan 2053 (rt=55.9887, f=3, i=324) [D:\lab212\membrane\Grace\Joyce\iTRAQ\_43\_1.raw]

Data File: Submitted from 20120508-1(merge) by Mascot Daemon on JOYCE-VAIO

Monoisotopic mass of neutral peptide Mr(calc): 2129.167

Variable modifications:

K11 :iTRAQ4plex (K)

K14 :iTRAQ4plex (K)

Ions Score: 51.12 Expect: 0.006

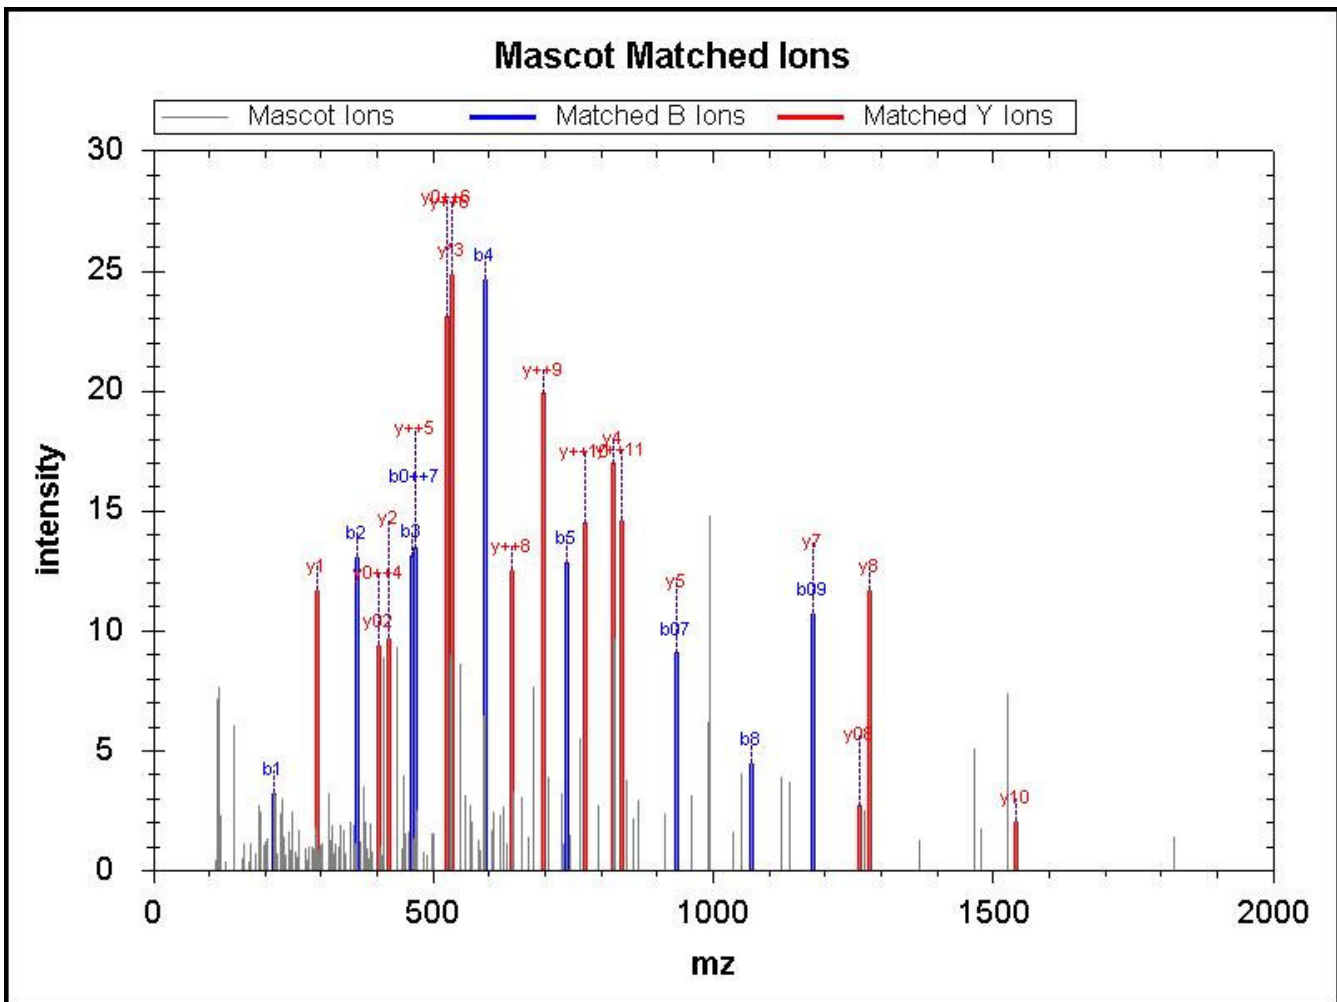

| No | b      | b++    | b* | b*++ | b0 | b0++ | Seq | y        | y++    | y*       | y*++   | y0       | y0++   | RevNo |
|----|--------|--------|----|------|----|------|-----|----------|--------|----------|--------|----------|--------|-------|
| 1  | 216.15 | 108.58 |    |      |    |      | A   |          |        |          |        |          |        | 14    |
| 2  | 363.21 | 182.11 |    |      |    |      | F   | 1,915.03 | 958.02 | 1,898.00 | 949.51 | 1,897.02 | 949.01 | 13    |

|    |          |        |          |        |          |        |   |          |        |          |        |          |        |    |
|----|----------|--------|----------|--------|----------|--------|---|----------|--------|----------|--------|----------|--------|----|
| 3  | 462.28   | 231.65 |          |        |          |        | V | 1,767.96 | 884.48 | 1,750.94 | 875.97 | 1,749.95 | 875.48 | 12 |
| 4  | 591.33   | 296.17 |          |        | 573.32   | 287.16 | E | 1,668.89 | 834.95 | 1,651.87 | 826.44 | 1,650.88 | 825.95 | 11 |
| 5  | 738.39   | 369.70 |          |        | 720.38   | 360.70 | F | 1,539.85 | 770.43 | 1,522.82 | 761.92 | 1,521.84 | 761.42 | 10 |
| 6  | 851.48   | 426.24 |          |        | 833.47   | 417.24 | L | 1,392.78 | 696.89 | 1,375.76 | 688.38 | 1,374.77 | 687.89 | 9  |
| 7  | 952.53   | 476.77 |          |        | 934.52   | 467.76 | T | 1,279.70 | 640.35 | 1,262.67 | 631.84 | 1,261.69 | 631.35 | 8  |
| 8  | 1,067.55 | 534.28 |          |        | 1,049.54 | 525.27 | D | 1,178.65 | 589.83 | 1,161.62 | 581.32 | 1,160.64 | 580.82 | 7  |
| 9  | 1,196.60 | 598.80 |          |        | 1,178.58 | 589.80 | E | 1,063.62 | 532.32 | 1,046.60 | 523.80 | 1,045.61 | 523.31 | 6  |
| 10 | 1,309.68 | 655.34 |          |        | 1,291.67 | 646.34 | I | 934.58   | 467.79 | 917.55   | 459.28 | 916.57   | 458.79 | 5  |
| 11 | 1,581.88 | 791.44 | 1,564.85 | 782.93 | 1,563.87 | 782.44 | K | 821.50   | 411.25 | 804.47   | 402.74 | 803.49   | 402.25 | 4  |
| 12 | 1,710.92 | 855.96 | 1,693.89 | 847.45 | 1,692.91 | 846.96 | E | 549.30   | 275.15 | 532.27   | 266.64 | 531.29   | 266.15 | 3  |
| 13 | 1,839.96 | 920.48 | 1,822.94 | 911.97 | 1,821.95 | 911.48 | E | 420.26   | 210.63 | 403.23   | 202.12 | 402.25   | 201.63 | 2  |
| 14 |          |        |          |        |          |        | K | 291.21   | 146.11 | 274.19   | 137.60 |          |        | 1  |

Query 50714 Hit 1

MS/MS Fragmentation of **EEGHAGPDDNEEVMR**

Found in **sp|P29083|T2EA\_HUMAN**, General transcription factor IIE subunit 1 OS=Homo sapiens GN=GTF2E1 PE=1 SV=2  
Match to Query 50714: 1827.782from(610.2681,3+)

Title: 100: Sum of 2 scans in range 337 (rt=16.923, f=4, i=55) to 338 (rt=16.9484, f=4, i=56)

[D:\lab212\membrane\Grace\Joyce\iTRAQ\_38\_2.raw]

Data File: Submitted from 20120508-1(merge) by Mascot Daemon on JOYCE-VAIO

Monoisotopic mass of neutral peptide Mr(calc): 1827.782

Variable modifications:

Ions Score: 51.11 Expect: 0.003

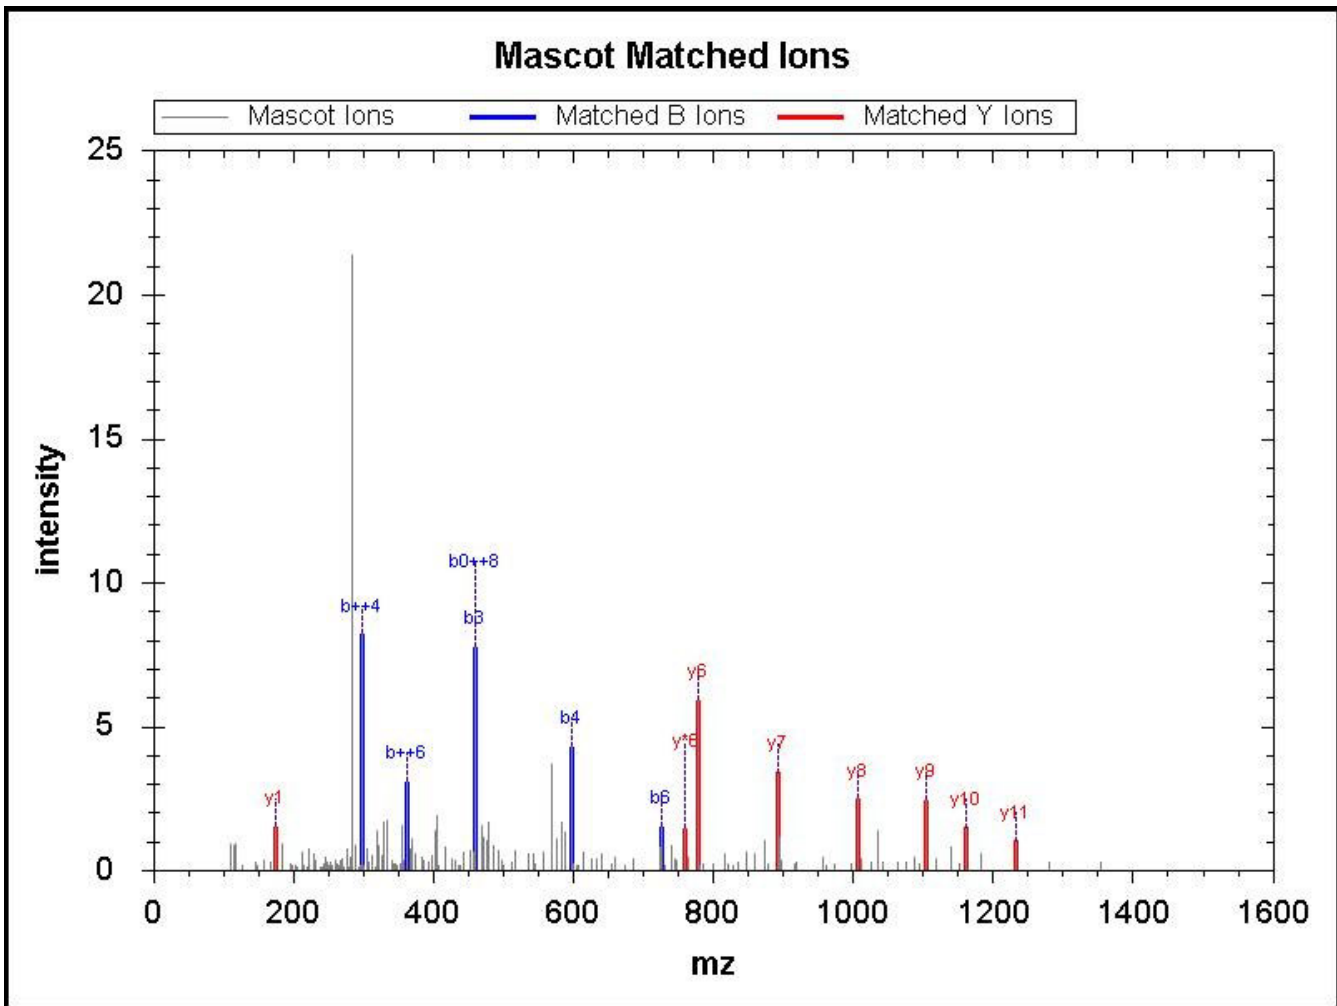

| No | b      | b++    | b* | b*++ | b0     | b0++   | Seq | y        | y++    | y*       | y*++   | y0       | y0++   | RevNo |
|----|--------|--------|----|------|--------|--------|-----|----------|--------|----------|--------|----------|--------|-------|
| 1  | 274.15 | 137.58 |    |      | 256.14 | 128.57 | E   |          |        |          |        |          |        | 15    |
| 2  | 403.19 | 202.10 |    |      | 385.18 | 193.10 | E   | 1,555.64 | 778.33 | 1,538.62 | 769.81 | 1,537.63 | 769.32 | 14    |

|    |          |        |          |        |          |        |   |          |        |          |        |          |        |    |
|----|----------|--------|----------|--------|----------|--------|---|----------|--------|----------|--------|----------|--------|----|
| 3  | 460.22   | 230.61 |          |        | 442.21   | 221.61 | G | 1,426.60 | 713.80 | 1,409.58 | 705.29 | 1,408.59 | 704.80 | 13 |
| 4  | 597.27   | 299.14 |          |        | 579.26   | 290.14 | H | 1,369.58 | 685.29 | 1,352.55 | 676.78 | 1,351.57 | 676.29 | 12 |
| 5  | 668.31   | 334.66 |          |        | 650.30   | 325.65 | A | 1,232.52 | 616.76 | 1,215.49 | 608.25 | 1,214.51 | 607.76 | 11 |
| 6  | 725.33   | 363.17 |          |        | 707.32   | 354.17 | G | 1,161.48 | 581.25 | 1,144.46 | 572.73 | 1,143.47 | 572.24 | 10 |
| 7  | 822.39   | 411.70 |          |        | 804.38   | 402.69 | P | 1,104.46 | 552.73 | 1,087.44 | 544.22 | 1,086.45 | 543.73 | 9  |
| 8  | 937.41   | 469.21 |          |        | 919.40   | 460.20 | D | 1,007.41 | 504.21 | 990.38   | 495.70 | 989.40   | 495.20 | 8  |
| 9  | 1,052.44 | 526.72 |          |        | 1,034.43 | 517.72 | D | 892.38   | 446.70 | 875.36   | 438.18 | 874.37   | 437.69 | 7  |
| 10 | 1,166.48 | 583.75 | 1,149.46 | 575.23 | 1,148.47 | 574.74 | N | 777.36   | 389.18 | 760.33   | 380.67 | 759.35   | 380.18 | 6  |
| 11 | 1,295.53 | 648.27 | 1,278.50 | 639.75 | 1,277.52 | 639.26 | E | 663.31   | 332.16 | 646.29   | 323.65 | 645.30   | 323.15 | 5  |
| 12 | 1,424.57 | 712.79 | 1,407.54 | 704.27 | 1,406.56 | 703.78 | E | 534.27   | 267.64 | 517.24   | 259.13 | 516.26   | 258.63 | 4  |
| 13 | 1,523.64 | 762.32 | 1,506.61 | 753.81 | 1,505.63 | 753.32 | V | 405.23   | 203.12 | 388.20   | 194.60 |          |        | 3  |
| 14 | 1,654.68 | 827.84 | 1,637.65 | 819.33 | 1,636.67 | 818.84 | M | 306.16   | 153.58 | 289.13   | 145.07 |          |        | 2  |
| 15 |          |        |          |        |          |        | R | 175.12   | 88.06  | 158.09   | 79.55  |          |        | 1  |

Query 33852 Hit 1

MS/MS Fragmentation of **ALSAETESHIYR**

Found in **sp|O14569|C56D2\_HUMAN**, Cytochrome b561 domain-containing protein 2 OS=Homo sapiens GN=CYB561D2 PE=1 SV=1

Match to Query 33852: 1519.774 from (507.5987, 3+)

Title: 304: Sum of 2 scans in range 729 (rt=26.0218, f=4, i=195) to 730 (rt=26.0472, f=4, i=196)

[D:\lab212\membrane\GraceJoyce\iTRAQ\_39\_2.raw]

Data File: Submitted from 20120508-1 (merge) by Mascot Daemon on JOYCE-VAIO

Monoisotopic mass of neutral peptide Mr(calc): 1519.774

Variable modifications:

Ions Score: 51.07 Expect: 0.007

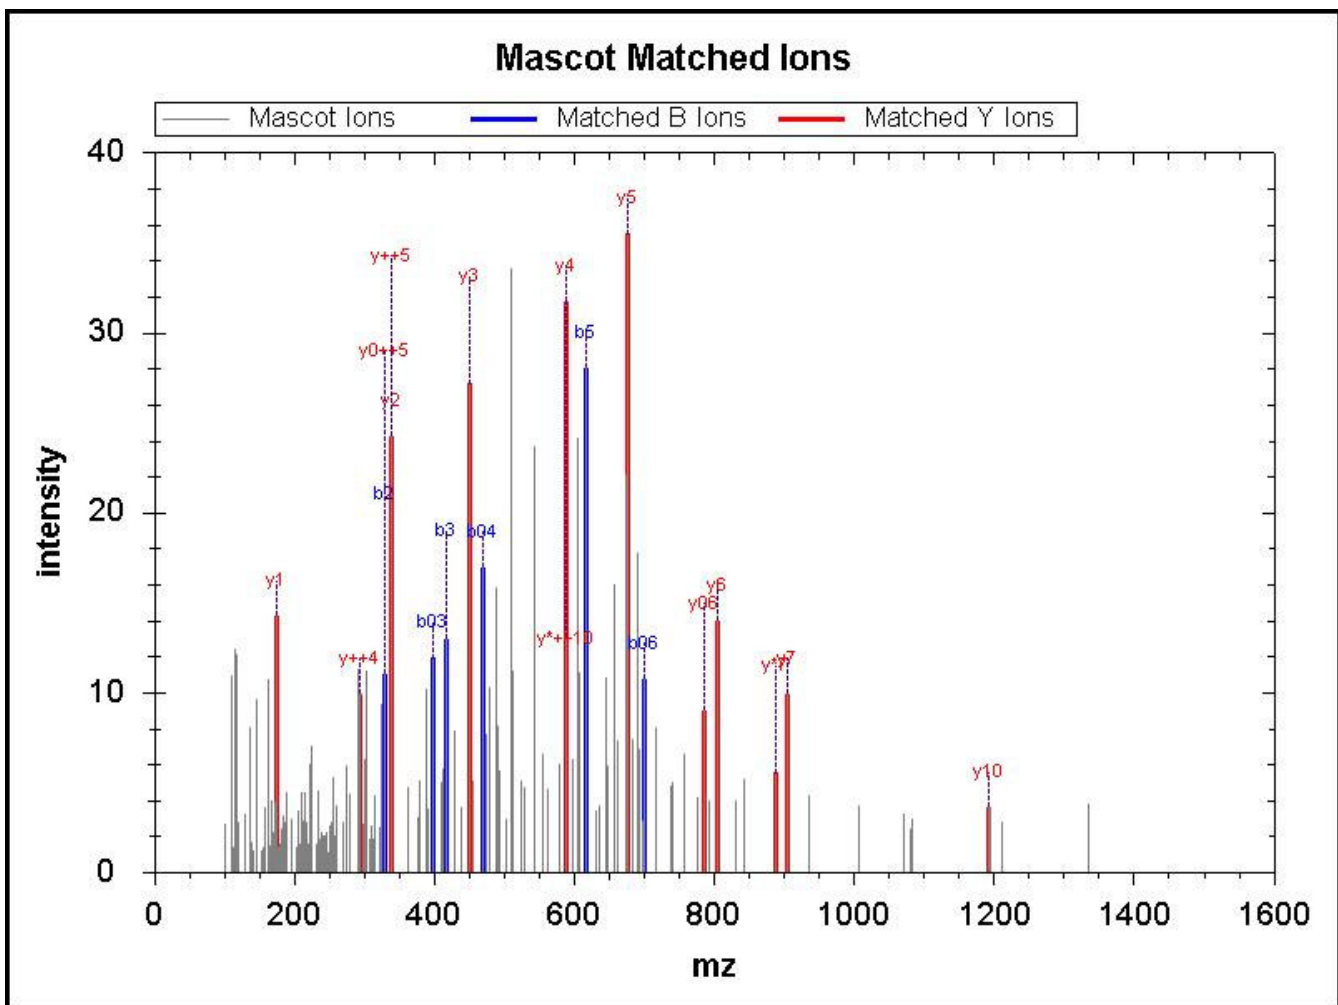

|    |          |        |          |        |   |          |        |          |        |          |        |  |  |    |
|----|----------|--------|----------|--------|---|----------|--------|----------|--------|----------|--------|--|--|----|
| 1  | 216.15   | 108.58 |          |        | A |          |        |          |        |          |        |  |  | 12 |
| 2  | 329.23   | 165.12 |          |        | L | 1,305.64 | 653.33 | 1,288.62 | 644.81 | 1,287.63 | 644.32 |  |  | 11 |
| 3  | 416.26   | 208.63 | 398.25   | 199.63 | S | 1,192.56 | 596.78 | 1,175.53 | 588.27 | 1,174.55 | 587.78 |  |  | 10 |
| 4  | 487.30   | 244.15 | 469.29   | 235.15 | A | 1,105.53 | 553.27 | 1,088.50 | 544.75 | 1,087.52 | 544.26 |  |  | 9  |
| 5  | 616.34   | 308.67 | 598.33   | 299.67 | E | 1,034.49 | 517.75 | 1,017.46 | 509.24 | 1,016.48 | 508.74 |  |  | 8  |
| 6  | 717.39   | 359.20 | 699.38   | 350.19 | T | 905.45   | 453.23 | 888.42   | 444.71 | 887.44   | 444.22 |  |  | 7  |
| 7  | 846.43   | 423.72 | 828.42   | 414.71 | E | 804.40   | 402.70 | 787.37   | 394.19 | 786.39   | 393.70 |  |  | 6  |
| 8  | 933.46   | 467.24 | 915.45   | 458.23 | S | 675.36   | 338.18 | 658.33   | 329.67 | 657.35   | 329.18 |  |  | 5  |
| 9  | 1,070.52 | 535.77 | 1,052.51 | 526.76 | H | 588.33   | 294.67 | 571.30   | 286.15 |          |        |  |  | 4  |
| 10 | 1,183.61 | 592.31 | 1,165.60 | 583.30 | I | 451.27   | 226.14 | 434.24   | 217.62 |          |        |  |  | 3  |
| 11 | 1,346.67 | 673.84 | 1,328.66 | 664.83 | Y | 338.18   | 169.59 | 321.16   | 161.08 |          |        |  |  | 2  |
| 12 |          |        |          |        | R | 175.12   | 88.06  | 158.09   | 79.55  |          |        |  |  | 1  |

Query 48712 Hit 1

MS/MS Fragmentation of **HLVLLDTAQA AAAAGHR**

Found in [sp|O00754|MA2B1\\_HUMAN](#), Lysosomal alpha-mannosidase OS=Homo sapiens GN=MAN2B1 PE=1 SV=3

Match to Query 48712: 1786.996from(596.6726,3+)

Title: 466: Scan 1153 (rt=35.1716, f=3, i=163) [D:\lab212\membrane\Grace\Joyce\iTRAQ\_48\_2.raw]

Data File: Submitted from 20120508-1(merge) by Mascot Daemon on JOYCE-VAIO

Monoisotopic mass of neutral peptide Mr(calc): 1786.996

Variable modifications:

Ions Score: 50.86 Expect: 0.006

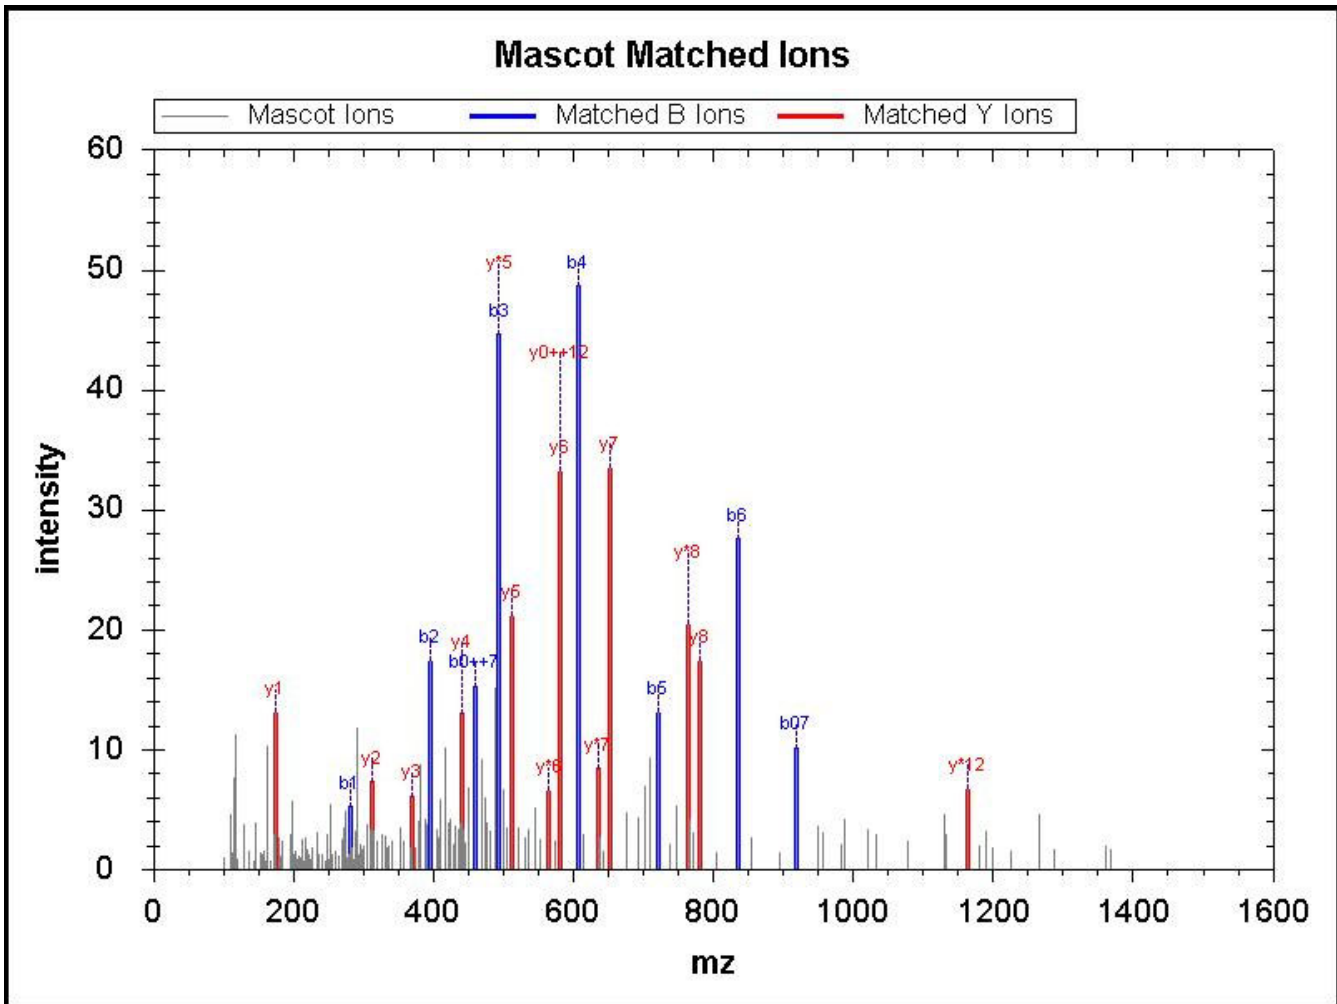

| No | b      | b++    | b* | b*++ | b0 | b0++ | Seq | y        | y++    | y*       | y*++   | y0       | y0++   | RevNo |
|----|--------|--------|----|------|----|------|-----|----------|--------|----------|--------|----------|--------|-------|
| 1  | 282.17 | 141.59 |    |      |    |      | H   |          |        |          |        |          |        | 16    |
| 2  | 395.25 | 198.13 |    |      |    |      | L   | 1,506.84 | 753.92 | 1,489.81 | 745.41 | 1,488.83 | 744.92 | 15    |

|    |          |        |          |        |          |        |   |          |        |          |        |          |        |    |
|----|----------|--------|----------|--------|----------|--------|---|----------|--------|----------|--------|----------|--------|----|
| 3  | 494.32   | 247.66 |          |        |          |        | V | 1,393.75 | 697.38 | 1,376.73 | 688.87 | 1,375.74 | 688.38 | 14 |
| 4  | 607.40   | 304.21 |          |        |          |        | L | 1,294.69 | 647.85 | 1,277.66 | 639.33 | 1,276.68 | 638.84 | 13 |
| 5  | 720.49   | 360.75 |          |        |          |        | L | 1,181.60 | 591.30 | 1,164.58 | 582.79 | 1,163.59 | 582.30 | 12 |
| 6  | 835.52   | 418.26 |          |        | 817.51   | 409.26 | D | 1,068.52 | 534.76 | 1,051.49 | 526.25 | 1,050.51 | 525.76 | 11 |
| 7  | 936.56   | 468.79 |          |        | 918.55   | 459.78 | T | 953.49   | 477.25 | 936.46   | 468.74 | 935.48   | 468.24 | 10 |
| 8  | 1,007.60 | 504.30 |          |        | 989.59   | 495.30 | A | 852.44   | 426.73 | 835.42   | 418.21 |          |        | 9  |
| 9  | 1,135.66 | 568.33 | 1,118.63 | 559.82 | 1,117.65 | 559.33 | Q | 781.41   | 391.21 | 764.38   | 382.69 |          |        | 8  |
| 10 | 1,206.70 | 603.85 | 1,189.67 | 595.34 | 1,188.69 | 594.85 | A | 653.35   | 327.18 | 636.32   | 318.66 |          |        | 7  |
| 11 | 1,277.73 | 639.37 | 1,260.71 | 630.86 | 1,259.72 | 630.37 | A | 582.31   | 291.66 | 565.28   | 283.15 |          |        | 6  |
| 12 | 1,348.77 | 674.89 | 1,331.74 | 666.38 | 1,330.76 | 665.88 | A | 511.27   | 256.14 | 494.25   | 247.63 |          |        | 5  |
| 13 | 1,419.81 | 710.41 | 1,402.78 | 701.89 | 1,401.80 | 701.40 | A | 440.24   | 220.62 | 423.21   | 212.11 |          |        | 4  |
| 14 | 1,476.83 | 738.92 | 1,459.80 | 730.40 | 1,458.82 | 729.91 | G | 369.20   | 185.10 | 352.17   | 176.59 |          |        | 3  |
| 15 | 1,613.89 | 807.45 | 1,596.86 | 798.93 | 1,595.88 | 798.44 | H | 312.18   | 156.59 | 295.15   | 148.08 |          |        | 2  |
| 16 |          |        |          |        |          |        | R | 175.12   | 88.06  | 158.09   | 79.55  |          |        | 1  |

Query 94284 Hit 1

MS/MS Fragmentation of **LQLFIQEVNHAVEETSHQALQNMPK**

Found in **sp|P83436|COG7\_HUMAN**, Conserved oligomeric Golgi complex subunit 7 OS=Homo sapiens GN=COG7 PE=1 SV=1

Match to Query 94284: 3191.669from(1064.897,3+)

Title: 927: Scan 2724 (rt=68.3447, f=2, i=437) [D:\lab212\membrane\Grace\Joyce\iTRAQ\_43\_2.raw]

Data File:Submitted from 20120508-1(merge) by Mascot Daemon on JOYCE-VAIO

Monoisotopic mass of neutral peptide Mr(calc): 3191.669

Variable modifications:

K25 iTRAQ4plex (K)

Ions Score: 50.78 Expect: 0.006

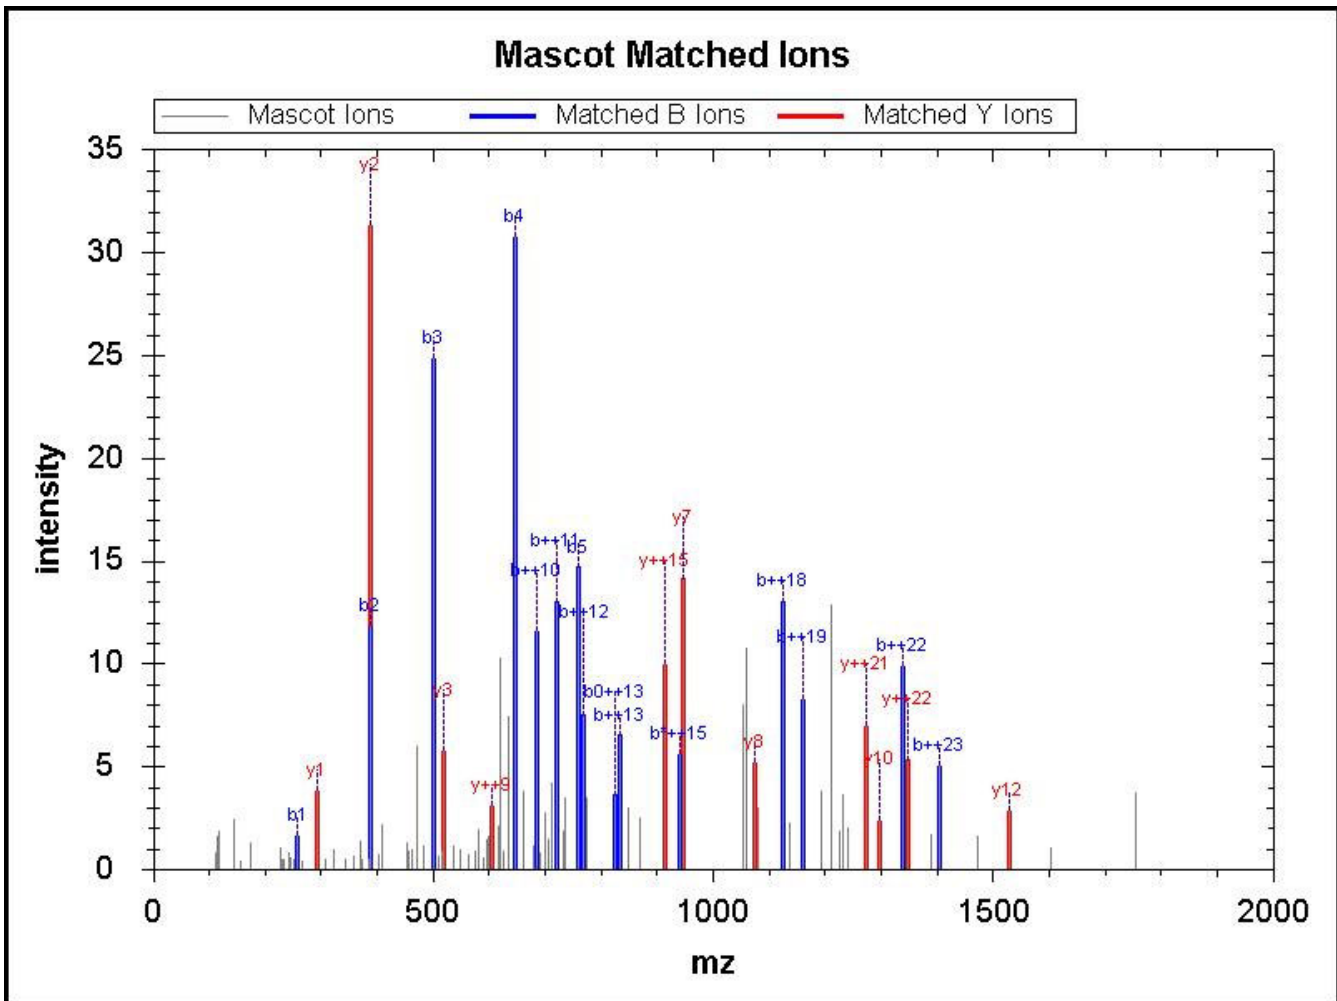



| No | b        | b++      | b*       | b*++     | b0       | b0++     | Seq | y        | y++      | y*       | y*++     | y0       | y0++     | RevNo |
|----|----------|----------|----------|----------|----------|----------|-----|----------|----------|----------|----------|----------|----------|-------|
| 1  | 258.19   | 129.60   |          |          |          |          | L   |          |          |          |          |          |          | 25    |
| 2  | 386.25   | 193.63   | 369.23   | 185.12   |          |          | Q   | 2,935.48 | 1,468.25 | 2,918.46 | 1,459.73 | 2,917.47 | 1,459.24 | 24    |
| 3  | 499.34   | 250.17   | 482.31   | 241.66   |          |          | L   | 2,807.43 | 1,404.22 | 2,790.40 | 1,395.70 | 2,789.42 | 1,395.21 | 23    |
| 4  | 646.40   | 323.71   | 629.38   | 315.19   |          |          | F   | 2,694.34 | 1,347.67 | 2,677.32 | 1,339.16 | 2,676.33 | 1,338.67 | 22    |
| 5  | 759.49   | 380.25   | 742.46   | 371.73   |          |          | I   | 2,547.27 | 1,274.14 | 2,530.25 | 1,265.63 | 2,529.26 | 1,265.14 | 21    |
| 6  | 887.55   | 444.28   | 870.52   | 435.76   |          |          | Q   | 2,434.19 | 1,217.60 | 2,417.16 | 1,209.09 | 2,416.18 | 1,208.59 | 20    |
| 7  | 1,016.59 | 508.80   | 999.56   | 500.29   | 998.58   | 499.79   | E   | 2,306.13 | 1,153.57 | 2,289.10 | 1,145.06 | 2,288.12 | 1,144.56 | 19    |
| 8  | 1,115.66 | 558.33   | 1,098.63 | 549.82   | 1,097.65 | 549.33   | V   | 2,177.09 | 1,089.05 | 2,160.06 | 1,080.53 | 2,159.08 | 1,080.04 | 18    |
| 9  | 1,229.70 | 615.35   | 1,212.67 | 606.84   | 1,211.69 | 606.35   | N   | 2,078.02 | 1,039.51 | 2,060.99 | 1,031.00 | 2,060.01 | 1,030.51 | 17    |
| 10 | 1,366.76 | 683.88   | 1,349.73 | 675.37   | 1,348.75 | 674.88   | H   | 1,963.98 | 982.49   | 1,946.95 | 973.98   | 1,945.97 | 973.49   | 16    |
| 11 | 1,437.80 | 719.40   | 1,420.77 | 710.89   | 1,419.79 | 710.40   | A   | 1,826.92 | 913.96   | 1,809.89 | 905.45   | 1,808.91 | 904.96   | 15    |
| 12 | 1,536.87 | 768.94   | 1,519.84 | 760.42   | 1,518.85 | 759.93   | V   | 1,755.88 | 878.44   | 1,738.86 | 869.93   | 1,737.87 | 869.44   | 14    |
| 13 | 1,665.91 | 833.46   | 1,648.88 | 824.94   | 1,647.90 | 824.45   | E   | 1,656.81 | 828.91   | 1,639.79 | 820.40   | 1,638.80 | 819.90   | 13    |
| 14 | 1,794.95 | 897.98   | 1,777.92 | 889.47   | 1,776.94 | 888.97   | E   | 1,527.77 | 764.39   | 1,510.74 | 755.88   | 1,509.76 | 755.38   | 12    |
| 15 | 1,896.00 | 948.50   | 1,878.97 | 939.99   | 1,877.99 | 939.50   | T   | 1,398.73 | 699.87   | 1,381.70 | 691.35   | 1,380.72 | 690.86   | 11    |
| 16 | 1,983.03 | 992.02   | 1,966.00 | 983.51   | 1,965.02 | 983.01   | S   | 1,297.68 | 649.34   | 1,280.65 | 640.83   | 1,279.67 | 640.34   | 10    |
| 17 | 2,120.09 | 1,060.55 | 2,103.06 | 1,052.04 | 2,102.08 | 1,051.54 | H   | 1,210.65 | 605.83   | 1,193.62 | 597.31   |          |          | 9     |
| 18 | 2,248.15 | 1,124.58 | 2,231.12 | 1,116.06 | 2,230.14 | 1,115.57 | Q   | 1,073.59 | 537.30   | 1,056.56 | 528.79   |          |          | 8     |
| 19 | 2,319.19 | 1,160.10 | 2,302.16 | 1,151.58 | 2,301.17 | 1,151.09 | A   | 945.53   | 473.27   | 928.50   | 464.76   |          |          | 7     |
| 20 | 2,432.27 | 1,216.64 | 2,415.24 | 1,208.12 | 2,414.26 | 1,207.63 | L   | 874.49   | 437.75   | 857.47   | 429.24   |          |          | 6     |
| 21 | 2,560.33 | 1,280.67 | 2,543.30 | 1,272.15 | 2,542.32 | 1,271.66 | Q   | 761.41   | 381.21   | 744.38   | 372.70   |          |          | 5     |
| 22 | 2,674.37 | 1,337.69 | 2,657.34 | 1,329.18 | 2,656.36 | 1,328.68 | N   | 633.35   | 317.18   | 616.32   | 308.67   |          |          | 4     |
| 23 | 2,805.41 | 1,403.21 | 2,788.38 | 1,394.70 | 2,787.40 | 1,394.20 | M   | 519.31   | 260.16   | 502.28   | 251.64   |          |          | 3     |
| 24 | 2,902.46 | 1,451.74 | 2,885.44 | 1,443.22 | 2,884.45 | 1,442.73 | P   | 388.27   | 194.64   | 371.24   | 186.12   |          |          | 2     |
| 25 |          |          |          |          |          |          | K   | 291.21   | 146.11   | 274.19   | 137.60   |          |          | 1     |

Query 93980 Hit 1

MS/MS Fragmentation of **ALYFYEQAITTPAMAVSHIMLESYK**

Found in **sp|Q9UNS2|CSN3\_HUMAN**, COP9 signalosome complex subunit 3 OS=Homo sapiens GN=COPS3 PE=1 SV=3

Match to Query 93980: 3164.616from(792.1612,4+)

Title: 1211: Sum of 2 scans in range 2805 (rt=72.0248, f=2, i=472) to 2806 (rt=72.0503, f=2, i=473)

[D:\lab212\membrane\GraceJoyce\iTRAQ\_32\_2.raw]

Data File:Submitted from 20120508-1(merge) by Mascot Daemon on JOYCE-VAIO

Monoisotopic mass of neutral peptide Mr(calc): 3164.616

Variable modifications:

K25 iTRAQ4plex (K)

Ions Score: 50.67 Expect: 0.007

### Mascot Matched Ions

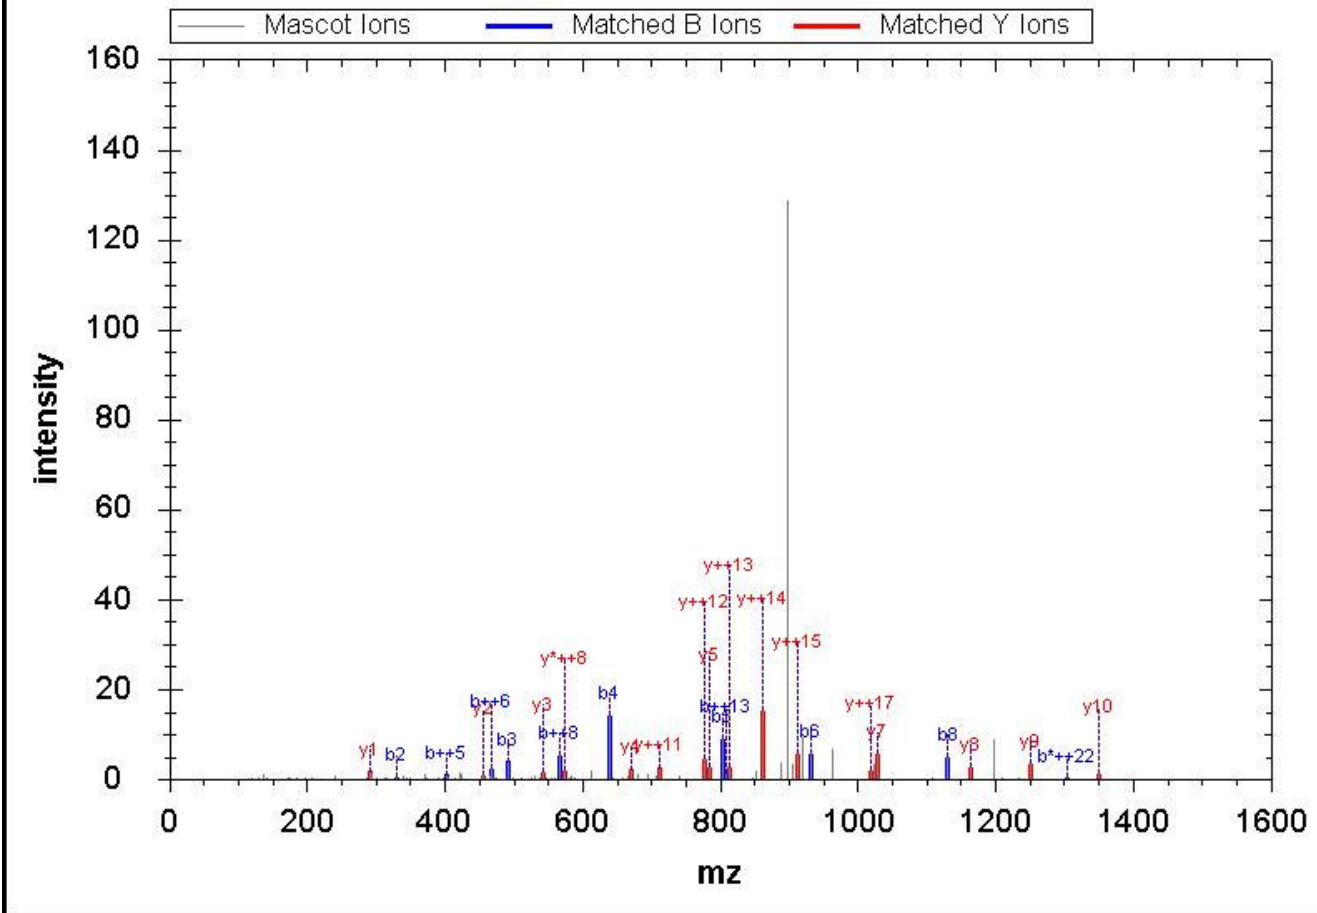

| No | b        | b++      | b*       | b***     | b0       | b0++     | Seq | y        | y++      | y*       | y***     | y0       | y0++     | RevNo |
|----|----------|----------|----------|----------|----------|----------|-----|----------|----------|----------|----------|----------|----------|-------|
| 1  | 216.15   | 108.58   |          |          |          |          | A   |          |          |          |          |          |          | 25    |
| 2  | 329.23   | 165.12   |          |          |          |          | L   | 2,950.48 | 1,475.75 | 2,933.46 | 1,467.23 | 2,932.47 | 1,466.74 | 24    |
| 3  | 492.29   | 246.65   |          |          |          |          | Y   | 2,837.40 | 1,419.20 | 2,820.37 | 1,410.69 | 2,819.39 | 1,410.20 | 23    |
| 4  | 639.36   | 320.18   |          |          |          |          | F   | 2,674.34 | 1,337.67 | 2,657.31 | 1,329.16 | 2,656.33 | 1,328.67 | 22    |
| 5  | 802.43   | 401.72   |          |          |          |          | Y   | 2,527.27 | 1,264.14 | 2,510.24 | 1,255.62 | 2,509.26 | 1,255.13 | 21    |
| 6  | 931.47   | 466.24   |          |          | 913.46   | 457.23   | E   | 2,364.21 | 1,182.61 | 2,347.18 | 1,174.09 | 2,346.20 | 1,173.60 | 20    |
| 7  | 1,059.53 | 530.27   | 1,042.50 | 521.75   | 1,041.52 | 521.26   | Q   | 2,235.16 | 1,118.09 | 2,218.14 | 1,109.57 | 2,217.15 | 1,109.08 | 19    |
| 8  | 1,130.56 | 565.79   | 1,113.54 | 557.27   | 1,112.55 | 556.78   | A   | 2,107.10 | 1,054.06 | 2,090.08 | 1,045.54 | 2,089.09 | 1,045.05 | 18    |
| 9  | 1,243.65 | 622.33   | 1,226.62 | 613.81   | 1,225.64 | 613.32   | I   | 2,036.07 | 1,018.54 | 2,019.04 | 1,010.02 | 2,018.06 | 1,009.53 | 17    |
| 10 | 1,344.70 | 672.85   | 1,327.67 | 664.34   | 1,326.69 | 663.85   | T   | 1,922.98 | 962.00   | 1,905.96 | 953.48   | 1,904.97 | 952.99   | 16    |
| 11 | 1,445.74 | 723.38   | 1,428.72 | 714.86   | 1,427.73 | 714.37   | T   | 1,821.94 | 911.47   | 1,804.91 | 902.96   | 1,803.93 | 902.47   | 15    |
| 12 | 1,542.80 | 771.90   | 1,525.77 | 763.39   | 1,524.79 | 762.90   | P   | 1,720.89 | 860.95   | 1,703.86 | 852.43   | 1,702.88 | 851.94   | 14    |
| 13 | 1,613.83 | 807.42   | 1,596.81 | 798.91   | 1,595.82 | 798.42   | A   | 1,623.84 | 812.42   | 1,606.81 | 803.91   | 1,605.82 | 803.42   | 13    |
| 14 | 1,744.87 | 872.94   | 1,727.85 | 864.43   | 1,726.86 | 863.94   | M   | 1,552.80 | 776.90   | 1,535.77 | 768.39   | 1,534.79 | 767.90   | 12    |
| 15 | 1,815.91 | 908.46   | 1,798.88 | 899.95   | 1,797.90 | 899.45   | A   | 1,421.76 | 711.38   | 1,404.73 | 702.87   | 1,403.75 | 702.38   | 11    |
| 16 | 1,914.98 | 957.99   | 1,897.95 | 949.48   | 1,896.97 | 948.99   | V   | 1,350.72 | 675.86   | 1,333.69 | 667.35   | 1,332.71 | 666.86   | 10    |
| 17 | 2,002.01 | 1,001.51 | 1,984.98 | 993.00   | 1,984.00 | 992.50   | S   | 1,251.65 | 626.33   | 1,234.63 | 617.82   | 1,233.64 | 617.32   | 9     |
| 18 | 2,139.07 | 1,070.04 | 2,122.04 | 1,061.53 | 2,121.06 | 1,061.03 | H   | 1,164.62 | 582.81   | 1,147.59 | 574.30   | 1,146.61 | 573.81   | 8     |
| 19 | 2,252.15 | 1,126.58 | 2,235.13 | 1,118.07 | 2,234.14 | 1,117.58 | I   | 1,027.56 | 514.28   | 1,010.53 | 505.77   | 1,009.55 | 505.28   | 7     |
| 20 | 2,383.19 | 1,192.10 | 2,366.17 | 1,183.59 | 2,365.18 | 1,183.10 | M   | 914.48   | 457.74   | 897.45   | 449.23   | 896.47   | 448.74   | 6     |
| 21 | 2,496.28 | 1,248.64 | 2,479.25 | 1,240.13 | 2,478.27 | 1,239.64 | L   | 783.44   | 392.22   | 766.41   | 383.71   | 765.43   | 383.22   | 5     |
| 22 | 2,625.32 | 1,313.16 | 2,608.29 | 1,304.65 | 2,607.31 | 1,304.16 | E   | 670.35   | 335.68   | 653.33   | 327.17   | 652.34   | 326.67   | 4     |
| 23 | 2,712.35 | 1,356.68 | 2,695.33 | 1,348.17 | 2,694.34 | 1,347.68 | S   | 541.31   | 271.16   | 524.28   | 262.65   | 523.30   | 262.15   | 3     |

|    |          |          |          |          |          |          |   |        |        |        |        |  |  |   |
|----|----------|----------|----------|----------|----------|----------|---|--------|--------|--------|--------|--|--|---|
| 24 | 2,875.42 | 1,438.21 | 2,858.39 | 1,429.70 | 2,857.41 | 1,429.21 | Y | 454.28 | 227.64 | 437.25 | 219.13 |  |  | 2 |
| 25 |          |          |          |          |          |          | K | 291.21 | 146.11 | 274.19 | 137.60 |  |  | 1 |

Query 15054 Hit 1

MS/MS Fragmentation of **LVLLFSGK**

Found in [sp|Q15126|PMVK\\_HUMAN](#), Phosphomevalonate kinase OS=Homo sapiens GN=PMVK PE=1 SV=3

Match to Query 15054: 1163.75 from (582.8824, 2+)

Title: 769: Sum of 2 scans in range 1800 (rt=49.4978, f=4, i=509) to 1801 (rt=49.5232, f=4, i=510)

[D:\lab212\membrane\Grace\Joyce\iTRAQ\_29\_1.raw]

Data File: Submitted from 20120508-1(merge) by Mascot Daemon on JOYCE-VAIO

Monoisotopic mass of neutral peptide Mr(calc): 1163.75

Variable modifications:

K8 iTRAQ4plex (K)

Ions Score: 50.51 Expect: 0.003

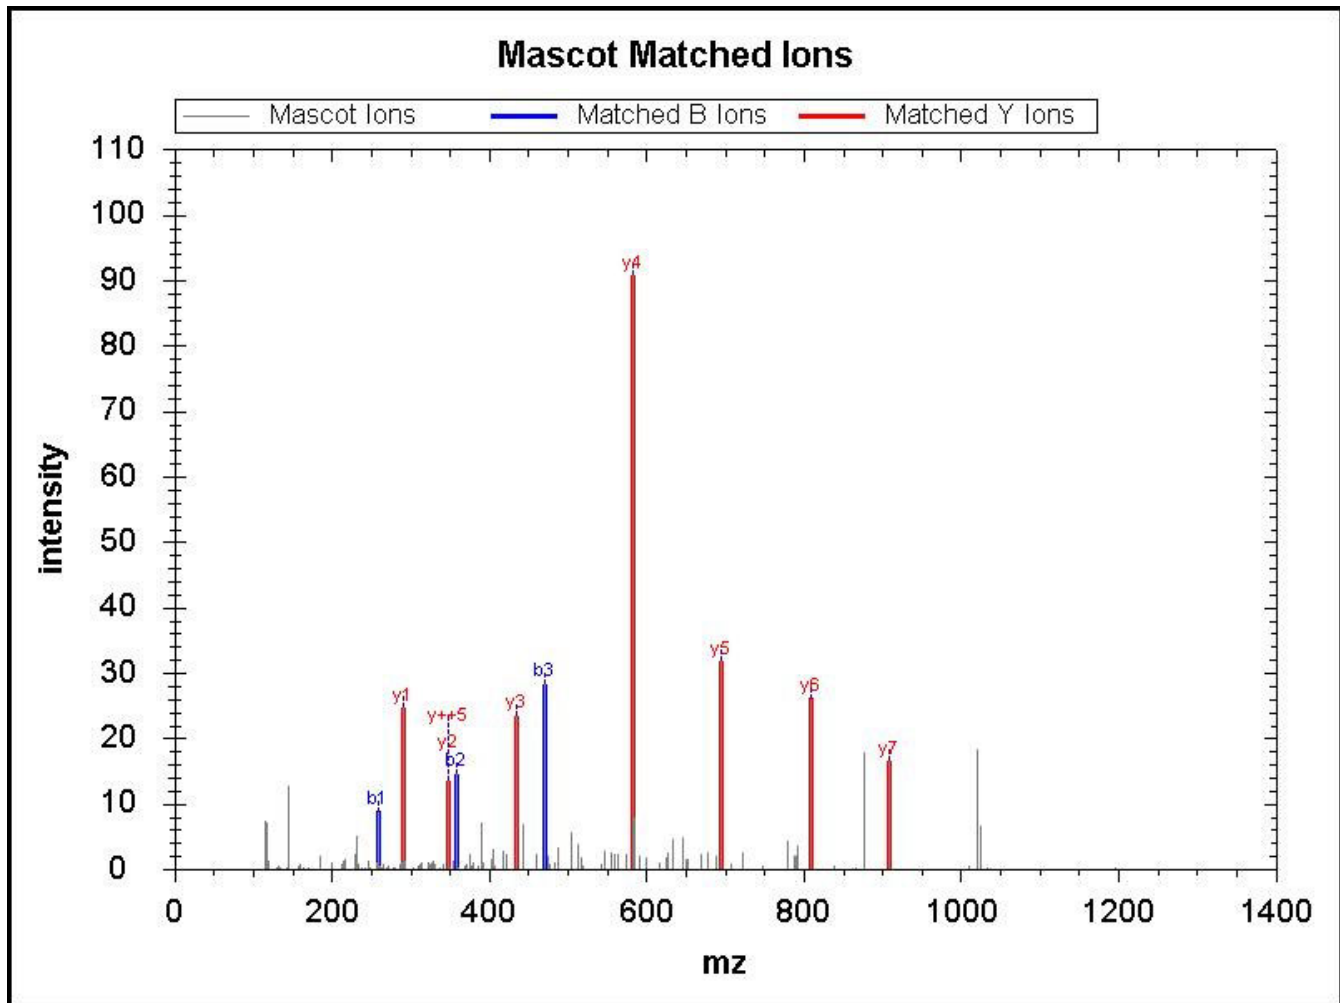

| No | b      | b++    | b0     | b0++   | Seq | y      | y++    | y*     | y*++   | y0     | y0++   | RevNo |
|----|--------|--------|--------|--------|-----|--------|--------|--------|--------|--------|--------|-------|
| 1  | 258.19 | 129.60 |        |        | L   |        |        |        |        |        |        | 8     |
| 2  | 357.26 | 179.13 |        |        | V   | 907.57 | 454.29 | 890.55 | 445.78 | 889.56 | 445.28 | 7     |
| 3  | 470.35 | 235.68 |        |        | L   | 808.50 | 404.76 | 791.48 | 396.24 | 790.49 | 395.75 | 6     |
| 4  | 583.43 | 292.22 |        |        | L   | 695.42 | 348.21 | 678.39 | 339.70 | 677.41 | 339.21 | 5     |
| 5  | 730.50 | 365.75 |        |        | F   | 582.34 | 291.67 | 565.31 | 283.16 | 564.33 | 282.67 | 4     |
| 6  | 817.53 | 409.27 | 799.52 | 400.26 | S   | 435.27 | 218.14 | 418.24 | 209.62 | 417.26 | 209.13 | 3     |
| 7  | 874.55 | 437.78 | 856.54 | 428.77 | G   | 348.24 | 174.62 | 331.21 | 166.11 |        |        | 2     |
| 8  |        |        |        |        | K   | 291.21 | 146.11 | 274.19 | 137.60 |        |        | 1     |

Query 70660 Hit 1

MS/MS Fragmentation of **MDILVTETEELAENILK**

Found in [sp|Q9NVX0|HAUS2\\_HUMAN](#), HAUS augmin-like complex subunit 2 OS=Homo sapiens GN=HAUS2 PE=1 SV=1  
 Match to Query 70660: 2248.21 from (750.4106,3+)

Title: 1408: Sum of 2 scans in range 3125 (rt=79.5561, f=2, i=517) to 3126 (rt=79.5815, f=2, i=518)

[D:\lab212\membrane\GraceJoyce\iTRAQ\_26\_2.raw]

Data File: Submitted from 20120508-1(merge) by Mascot Daemon on JOYCE-VAIO

Monoisotopic mass of neutral peptide Mr(calc): 2248.21

Variable modifications:

K17 iTRAQ4plex (K)

Ions Score: 50.48 Expect: 0.007

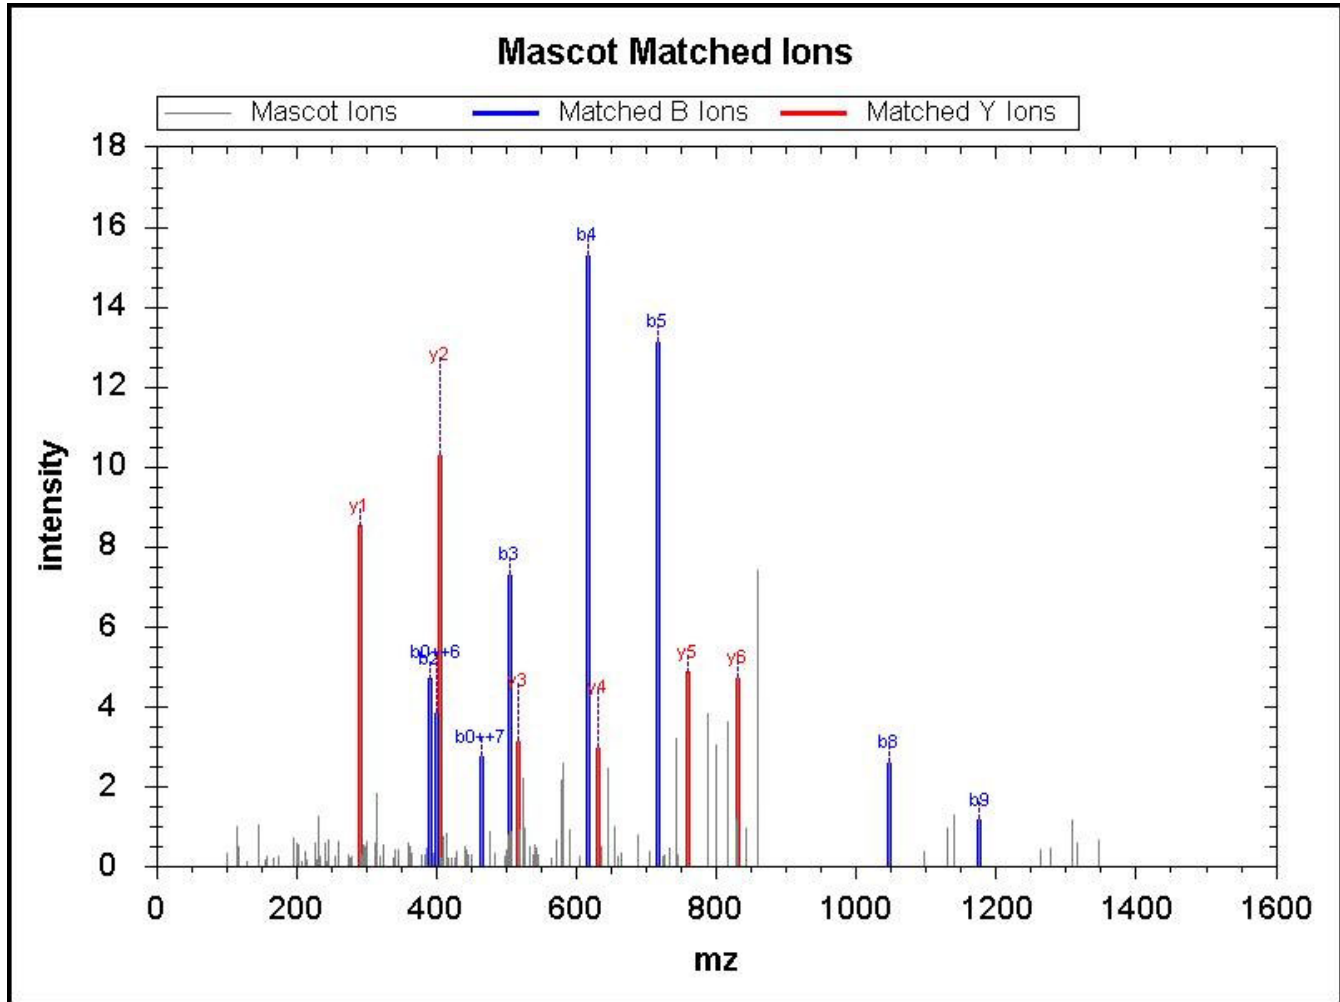

| No | b        | b++    | b*       | b*++   | b0       | b0++   | Seq | y        | y++    | y*       | y*++   | y0       | y0++   | RevNo |
|----|----------|--------|----------|--------|----------|--------|-----|----------|--------|----------|--------|----------|--------|-------|
| 1  | 276.15   | 138.58 |          |        |          |        | M   |          |        |          |        |          |        | 17    |
| 2  | 391.18   | 196.09 |          |        | 373.17   | 187.09 | D   | 1,974.08 | 987.54 | 1,957.05 | 979.03 | 1,956.07 | 978.54 | 16    |
| 3  | 504.26   | 252.63 |          |        | 486.25   | 243.63 | I   | 1,859.05 | 930.03 | 1,842.02 | 921.52 | 1,841.04 | 921.02 | 15    |
| 4  | 617.34   | 309.18 |          |        | 599.33   | 300.17 | L   | 1,745.97 | 873.49 | 1,728.94 | 864.97 | 1,727.95 | 864.48 | 14    |
| 5  | 716.41   | 358.71 |          |        | 698.40   | 349.70 | V   | 1,632.88 | 816.94 | 1,615.85 | 808.43 | 1,614.87 | 807.94 | 13    |
| 6  | 817.46   | 409.23 |          |        | 799.45   | 400.23 | T   | 1,533.81 | 767.41 | 1,516.79 | 758.90 | 1,515.80 | 758.40 | 12    |
| 7  | 946.50   | 473.76 |          |        | 928.49   | 464.75 | E   | 1,432.77 | 716.89 | 1,415.74 | 708.37 | 1,414.75 | 707.88 | 11    |
| 8  | 1,047.55 | 524.28 |          |        | 1,029.54 | 515.27 | T   | 1,303.72 | 652.36 | 1,286.70 | 643.85 | 1,285.71 | 643.36 | 10    |
| 9  | 1,176.59 | 588.80 |          |        | 1,158.58 | 579.80 | E   | 1,202.67 | 601.84 | 1,185.65 | 593.33 | 1,184.66 | 592.84 | 9     |
| 10 | 1,305.64 | 653.32 |          |        | 1,287.63 | 644.32 | E   | 1,073.63 | 537.32 | 1,056.61 | 528.81 | 1,055.62 | 528.31 | 8     |
| 11 | 1,418.72 | 709.86 |          |        | 1,400.71 | 700.86 | L   | 944.59   | 472.80 | 927.56   | 464.29 | 926.58   | 463.79 | 7     |
| 12 | 1,489.76 | 745.38 |          |        | 1,471.75 | 736.38 | A   | 831.51   | 416.26 | 814.48   | 407.74 | 813.49   | 407.25 | 6     |
| 13 | 1,618.80 | 809.90 |          |        | 1,600.79 | 800.90 | E   | 760.47   | 380.74 | 743.44   | 372.22 | 742.46   | 371.73 | 5     |
| 14 | 1,732.84 | 866.93 | 1,715.82 | 858.41 | 1,714.83 | 857.92 | N   | 631.43   | 316.22 | 614.40   | 307.70 |          |        | 4     |
| 15 | 1,845.93 | 923.47 | 1,828.90 | 914.95 | 1,827.92 | 914.46 | I   | 517.38   | 259.20 | 500.36   | 250.68 |          |        | 3     |
| 16 | 1,959.01 | 980.01 | 1,941.98 | 971.50 | 1,941.00 | 971.00 | L   | 404.30   | 202.65 | 387.27   | 194.14 |          |        | 2     |

Query 72926 Hit 1

MS/MS Fragmentation of **FIAHVPVPSQQEIEEALVR**

Found in **sp|Q9ULR0|ISY1\_HUMAN**, Pre-mRNA-splicing factor ISY1 homolog OS=Homo sapiens GN=ISY1 PE=1 SV=3

Match to Query 72926: 2305.247from(769.423,3+)

Title: 848: Sum of 2 scans in range 1903 (rt=52.2309, f=4, i=569) to 1904 (rt=52.2563, f=4, i=570)

[D:\lab212\membrane\Grace\Joyce\iTRAQ\_31\_2.raw]

Data File: Submitted from 20120508-1(merge) by Mascot Daemon on JOYCE-VAIO

Monoisotopic mass of neutral peptide Mr(calc): 2305.247

Variable modifications:

Ions Score: 50.43 Expect: 0.007

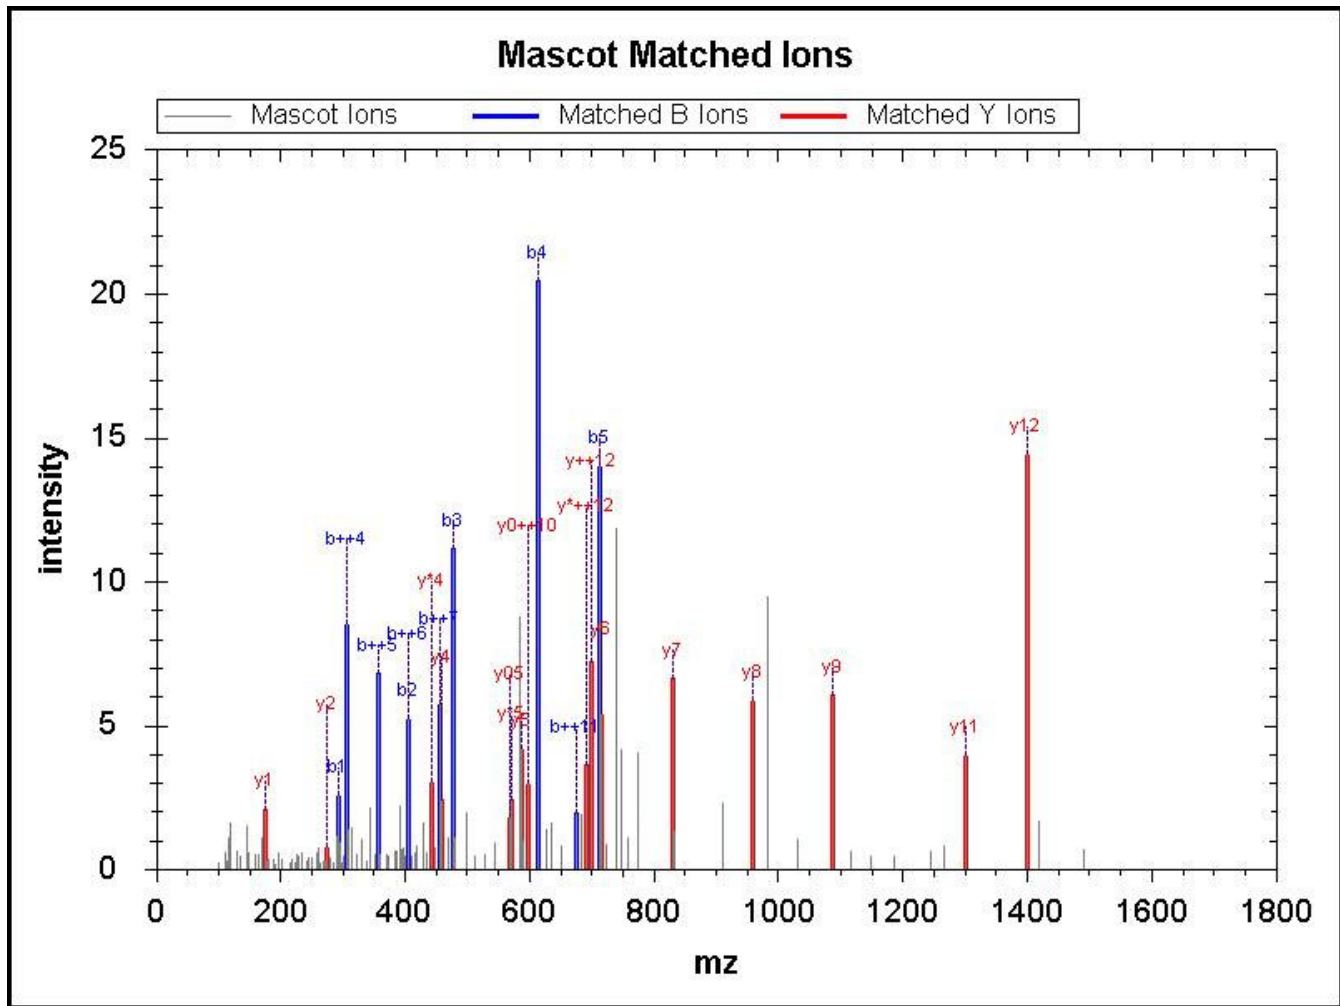

| No | b        | b++    | b*       | b***   | b0       | b0++   | Seq | y        | y++      | y*       | y***   | y0       | y0++   | RevNo |
|----|----------|--------|----------|--------|----------|--------|-----|----------|----------|----------|--------|----------|--------|-------|
| 1  | 292.18   | 146.59 |          |        |          |        | F   |          |          |          |        |          |        | 19    |
| 2  | 405.26   | 203.13 |          |        |          |        | I   | 2,015.09 | 1,008.05 | 1,998.07 | 999.54 | 1,997.08 | 999.04 | 18    |
| 3  | 476.30   | 238.65 |          |        |          |        | A   | 1,902.01 | 951.51   | 1,884.98 | 942.99 | 1,884.00 | 942.50 | 17    |
| 4  | 613.36   | 307.18 |          |        |          |        | H   | 1,830.97 | 915.99   | 1,813.94 | 907.48 | 1,812.96 | 906.98 | 16    |
| 5  | 712.43   | 356.72 |          |        |          |        | V   | 1,693.91 | 847.46   | 1,676.89 | 838.95 | 1,675.90 | 838.45 | 15    |
| 6  | 809.48   | 405.24 |          |        |          |        | P   | 1,594.84 | 797.93   | 1,577.82 | 789.41 | 1,576.83 | 788.92 | 14    |
| 7  | 908.55   | 454.78 |          |        |          |        | V   | 1,497.79 | 749.40   | 1,480.76 | 740.89 | 1,479.78 | 740.39 | 13    |
| 8  | 1,005.60 | 503.30 |          |        |          |        | P   | 1,398.72 | 699.86   | 1,381.70 | 691.35 | 1,380.71 | 690.86 | 12    |
| 9  | 1,092.63 | 546.82 |          |        | 1,074.62 | 537.81 | S   | 1,301.67 | 651.34   | 1,284.64 | 642.83 | 1,283.66 | 642.33 | 11    |
| 10 | 1,220.69 | 610.85 | 1,203.66 | 602.34 | 1,202.68 | 601.84 | Q   | 1,214.64 | 607.82   | 1,197.61 | 599.31 | 1,196.63 | 598.82 | 10    |
| 11 | 1,348.75 | 674.88 | 1,331.72 | 666.37 | 1,330.74 | 665.87 | Q   | 1,086.58 | 543.79   | 1,069.55 | 535.28 | 1,068.57 | 534.79 | 9     |
| 12 | 1,477.79 | 739.40 | 1,460.77 | 730.89 | 1,459.78 | 730.39 | E   | 958.52   | 479.76   | 941.49   | 471.25 | 940.51   | 470.76 | 8     |
| 13 | 1,590.88 | 795.94 | 1,573.85 | 787.43 | 1,572.87 | 786.94 | I   | 829.48   | 415.24   | 812.45   | 406.73 | 811.47   | 406.24 | 7     |

|    |          |          |          |          |          |          |   |        |        |        |        |        |        |   |
|----|----------|----------|----------|----------|----------|----------|---|--------|--------|--------|--------|--------|--------|---|
| 14 | 1,719.92 | 860.46   | 1,702.89 | 851.95   | 1,701.91 | 851.46   | E | 716.39 | 358.70 | 699.37 | 350.19 | 698.38 | 349.70 | 6 |
| 15 | 1,848.96 | 924.98   | 1,831.93 | 916.47   | 1,830.95 | 915.98   | E | 587.35 | 294.18 | 570.32 | 285.67 | 569.34 | 285.17 | 5 |
| 16 | 1,920.00 | 960.50   | 1,902.97 | 951.99   | 1,901.99 | 951.50   | A | 458.31 | 229.66 | 441.28 | 221.14 |        |        | 4 |
| 17 | 2,033.08 | 1,017.04 | 2,016.06 | 1,008.53 | 2,015.07 | 1,008.04 | L | 387.27 | 194.14 | 370.24 | 185.63 |        |        | 3 |
| 18 | 2,132.15 | 1,066.58 | 2,115.12 | 1,058.07 | 2,114.14 | 1,057.57 | V | 274.19 | 137.60 | 257.16 | 129.08 |        |        | 2 |
| 19 |          |          |          |          |          |          | R | 175.12 | 88.06  | 158.09 | 79.55  |        |        | 1 |

Query 45252 Hit 1

MS/MS Fragmentation of **VLVDGEEHVGFLK**

Found in **sp|Q9NPA0|CO024\_HUMAN**, UPF0480 protein C15orf24 OS=Homo sapiens GN=C15orf24 PE=1 SV=1

Match to Query 45252: 1728.912from(577.3113,3+)

Title: 580: Scan 1286 (rt=38.7193, f=3, i=200) [D:\lab212\membrane\Grace\Joyce\iTRAQ40.raw]

Data File: Submitted from 20120508-1(merge) by Mascot Daemon on JOYCE-VAIO

Monoisotopic mass of neutral peptide Mr(calc): 1728.912

Variable modifications:

K13 iTRAQ4plex (K)

Ions Score: 50.39 Expect: 0.008

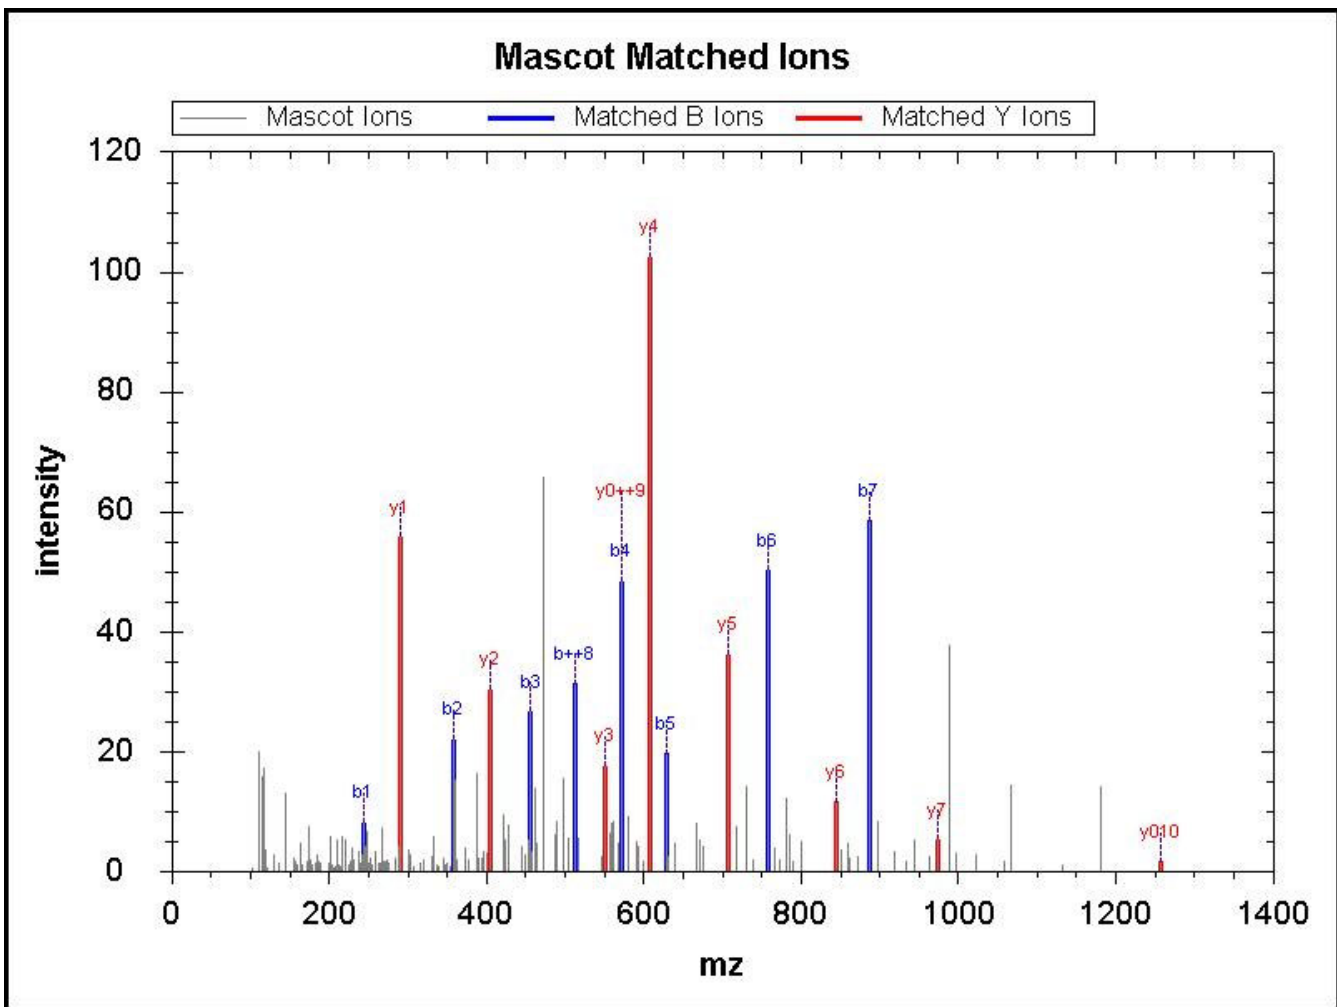

| No | b        | b++    | b0       | b0++   | Seq | y        | y++    | y*       | y*++   | y0       | y0++   | RevNo |
|----|----------|--------|----------|--------|-----|----------|--------|----------|--------|----------|--------|-------|
| 1  | 244.18   | 122.59 |          |        | V   |          |        |          |        |          |        | 13    |
| 2  | 357.26   | 179.13 |          |        | L   | 1,486.80 | 743.90 | 1,469.78 | 735.39 | 1,468.79 | 734.90 | 12    |
| 3  | 456.33   | 228.67 |          |        | V   | 1,373.72 | 687.36 | 1,356.69 | 678.85 | 1,355.71 | 678.36 | 11    |
| 4  | 571.36   | 286.18 | 553.35   | 277.18 | D   | 1,274.65 | 637.83 | 1,257.62 | 629.32 | 1,256.64 | 628.82 | 10    |
| 5  | 628.38   | 314.69 | 610.37   | 305.69 | G   | 1,159.62 | 580.32 | 1,142.60 | 571.80 | 1,141.61 | 571.31 | 9     |
| 6  | 757.42   | 379.21 | 739.41   | 370.21 | E   | 1,102.60 | 551.80 | 1,085.57 | 543.29 | 1,084.59 | 542.80 | 8     |
| 7  | 886.46   | 443.74 | 868.45   | 434.73 | E   | 973.56   | 487.28 | 956.53   | 478.77 | 955.55   | 478.28 | 7     |
| 8  | 1,023.52 | 512.27 | 1,005.51 | 503.26 | H   | 844.52   | 422.76 | 827.49   | 414.25 |          |        | 6     |

|    |          |        |          |        |   |        |        |        |        |  |  |  |   |
|----|----------|--------|----------|--------|---|--------|--------|--------|--------|--|--|--|---|
| 9  | 1,122.59 | 561.80 | 1,104.58 | 552.79 | V | 707.46 | 354.23 | 690.43 | 345.72 |  |  |  | 5 |
| 10 | 1,179.61 | 590.31 | 1,161.60 | 581.30 | G | 608.39 | 304.70 | 591.36 | 296.18 |  |  |  | 4 |
| 11 | 1,326.68 | 663.84 | 1,308.67 | 654.84 | F | 551.37 | 276.19 | 534.34 | 267.67 |  |  |  | 3 |
| 12 | 1,439.77 | 720.39 | 1,421.75 | 711.38 | L | 404.30 | 202.65 | 387.27 | 194.14 |  |  |  | 2 |
| 13 |          |        |          |        | K | 291.21 | 146.11 | 274.19 | 137.60 |  |  |  | 1 |

Query 73054 Hit 1

MS/MS Fragmentation of **GQTVEDLLEVLSDIDEMSR**

Found in **sp|Q8N201|INT1\_HUMAN**, Integrator complex subunit 1 OS=Homo sapiens GN=INTS1 PE=1 SV=2

Match to Query 73054: 2308.123from(770.3816,3+)

Title: 898: Sum of 2 scans in range 2847 (rt=71.4021, f=4, i=487) to 2848 (rt=71.4275, f=4, i=488)

[D:\lab212\membrane\Grace\Joyce\iTRAQ19.raw]

Data File:Submitted from 20120508-1(merge) by Mascot Daemon on JOYCE-VAIO

Monoisotopic mass of neutral peptide Mr(calc): 2308.123

Variable modifications:

M17 :Oxidation (M), 63.99828

Ions Score: 50.33 Expect: 0.008

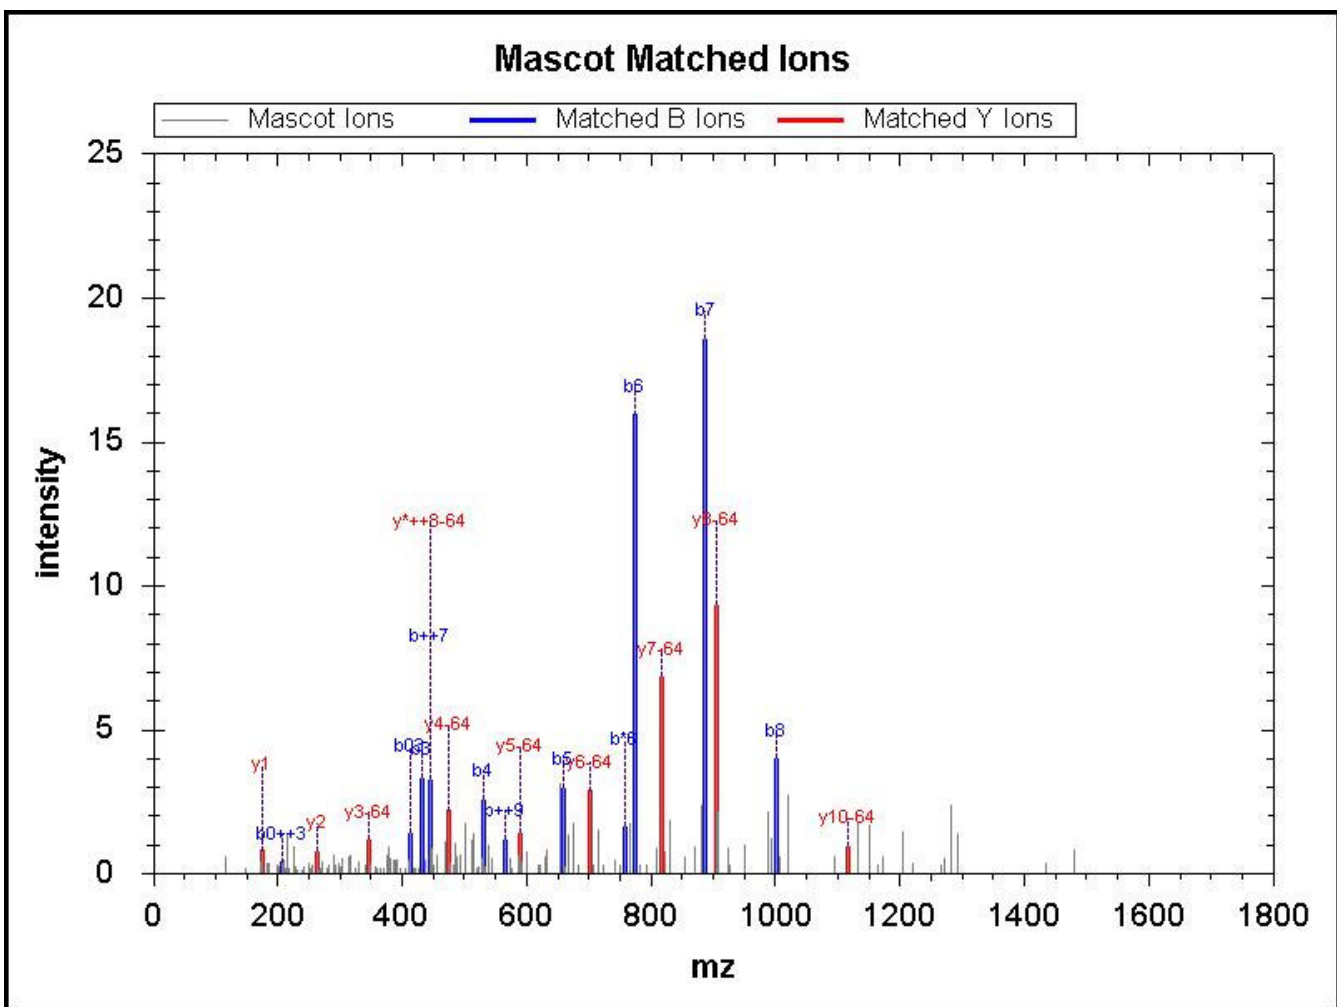

| No | b      | b++    | b*     | b*++   | b0     | b0++   | Seq | y        | y++      | y*       | y*++     | y0       | y0++     | RevNo |
|----|--------|--------|--------|--------|--------|--------|-----|----------|----------|----------|----------|----------|----------|-------|
| 1  | 202.13 | 101.57 |        |        |        |        | G   |          |          |          |          |          |          | 19    |
| 2  | 330.19 | 165.60 | 313.16 | 157.09 |        |        | Q   | 2,044.01 | 1,022.51 | 2,026.98 | 1,013.99 | 2,026.00 | 1,013.50 | 18    |
| 3  | 431.24 | 216.12 | 414.21 | 207.61 | 413.23 | 207.12 | T   | 1,915.95 | 958.48   | 1,898.92 | 949.97   | 1,897.94 | 949.47   | 17    |
| 4  | 530.31 | 265.66 | 513.28 | 257.14 | 512.29 | 256.65 | V   | 1,814.90 | 907.95   | 1,797.88 | 899.44   | 1,796.89 | 898.95   | 16    |
| 5  | 659.35 | 330.18 | 642.32 | 321.66 | 641.34 | 321.17 | E   | 1,715.83 | 858.42   | 1,698.81 | 849.91   | 1,697.82 | 849.42   | 15    |
| 6  | 774.38 | 387.69 | 757.35 | 379.18 | 756.36 | 378.69 | D   | 1,586.79 | 793.90   | 1,569.76 | 785.39   | 1,568.78 | 784.89   | 14    |
| 7  | 887.46 | 444.23 | 870.43 | 435.72 | 869.45 | 435.23 | L   | 1,471.76 | 736.39   | 1,454.74 | 727.87   | 1,453.75 | 727.38   | 13    |

|    |          |          |          |          |          |          |   |          |        |          |        |          |        |    |
|----|----------|----------|----------|----------|----------|----------|---|----------|--------|----------|--------|----------|--------|----|
| 8  | 1,000.54 | 500.78   | 983.52   | 492.26   | 982.53   | 491.77   | L | 1,358.68 | 679.84 | 1,341.65 | 671.33 | 1,340.67 | 670.84 | 12 |
| 9  | 1,129.59 | 565.30   | 1,112.56 | 556.78   | 1,111.58 | 556.29   | E | 1,245.60 | 623.30 | 1,228.57 | 614.79 | 1,227.58 | 614.30 | 11 |
| 10 | 1,228.65 | 614.83   | 1,211.63 | 606.32   | 1,210.64 | 605.83   | V | 1,116.55 | 558.78 | 1,099.53 | 550.27 | 1,098.54 | 549.77 | 10 |
| 11 | 1,341.74 | 671.37   | 1,324.71 | 662.86   | 1,323.73 | 662.37   | L | 1,017.48 | 509.25 | 1,000.46 | 500.73 | 999.47   | 500.24 | 9  |
| 12 | 1,428.77 | 714.89   | 1,411.74 | 706.38   | 1,410.76 | 705.88   | S | 904.40   | 452.70 | 887.37   | 444.19 | 886.39   | 443.70 | 8  |
| 13 | 1,543.80 | 772.40   | 1,526.77 | 763.89   | 1,525.79 | 763.40   | D | 817.37   | 409.19 | 800.34   | 400.67 | 799.36   | 400.18 | 7  |
| 14 | 1,656.88 | 828.94   | 1,639.85 | 820.43   | 1,638.87 | 819.94   | I | 702.34   | 351.67 | 685.32   | 343.16 | 684.33   | 342.67 | 6  |
| 15 | 1,771.91 | 886.46   | 1,754.88 | 877.94   | 1,753.90 | 877.45   | D | 589.26   | 295.13 | 572.23   | 286.62 | 571.25   | 286.13 | 5  |
| 16 | 1,900.95 | 950.98   | 1,883.92 | 942.47   | 1,882.94 | 941.97   | E | 474.23   | 237.62 | 457.20   | 229.11 | 456.22   | 228.61 | 4  |
| 17 | 1,983.99 | 992.50   | 1,966.96 | 983.98   | 1,965.98 | 983.49   | M | 345.19   | 173.10 | 328.16   | 164.58 | 327.18   | 164.09 | 3  |
| 18 | 2,071.02 | 1,036.01 | 2,053.99 | 1,027.50 | 2,053.01 | 1,027.01 | S | 262.15   | 131.58 | 245.12   | 123.07 | 244.14   | 122.57 | 2  |
| 19 |          |          |          |          |          |          | R | 175.12   | 88.06  | 158.09   | 79.55  |          |        | 1  |

Query 53264 Hit 1

MS/MS Fragmentation of **VNPDMNFEVFIHK**

Found in **sp|Q9HB90|RRAGC\_HUMAN**, Ras-related GTP-binding protein C OS=Homo sapiens GN=RRAGC PE=1 SV=1

Match to Query 53264: 1876.942from(626.6545,3+)

Title: 764: Sum of 2 scans in range 1665 (rt=47.2628, f=4, i=517) to 1666 (rt=47.2882, f=4, i=518)

[D:\lab212\membrane\GraceJoyce\iTRAQ40.raw]

Data File: Submitted from 20120508-1(merge) by Mascot Daemon on JOYCE-VAIO

Monoisotopic mass of neutral peptide Mr(calc): 1876.942

Variable modifications:

K13 iTRAQ4plex (K)

Ions Score: 50.32 Expect: 0.009

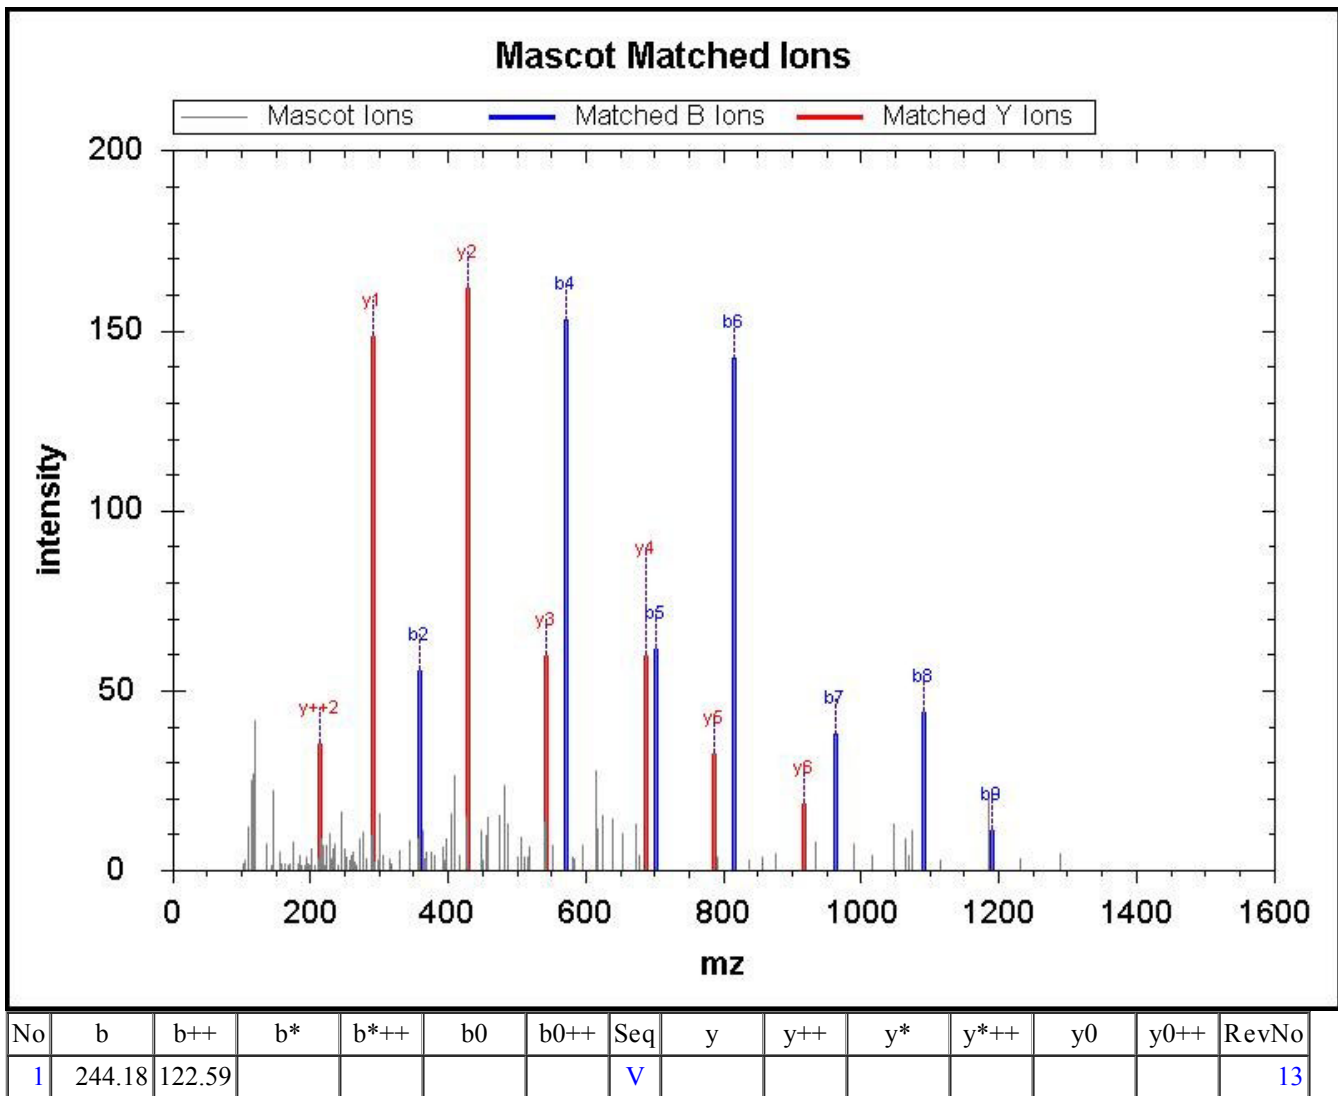



|    |          |        |          |        |          |        |   |          |        |          |        |          |        |    |
|----|----------|--------|----------|--------|----------|--------|---|----------|--------|----------|--------|----------|--------|----|
| 2  | 358.22   | 179.61 | 341.19   | 171.10 |          |        | N | 1,634.81 | 817.91 | 1,617.79 | 809.40 | 1,616.80 | 808.90 | 12 |
| 3  | 455.27   | 228.14 | 438.25   | 219.63 |          |        | P | 1,520.77 | 760.89 | 1,503.74 | 752.37 | 1,502.76 | 751.88 | 11 |
| 4  | 570.30   | 285.65 | 553.27   | 277.14 | 552.29   | 276.65 | D | 1,423.72 | 712.36 | 1,406.69 | 703.85 | 1,405.71 | 703.36 | 10 |
| 5  | 701.34   | 351.17 | 684.31   | 342.66 | 683.33   | 342.17 | M | 1,308.69 | 654.85 | 1,291.66 | 646.34 | 1,290.68 | 645.84 | 9  |
| 6  | 815.38   | 408.20 | 798.36   | 399.68 | 797.37   | 399.19 | N | 1,177.65 | 589.33 | 1,160.62 | 580.81 | 1,159.64 | 580.32 | 8  |
| 7  | 962.45   | 481.73 | 945.43   | 473.22 | 944.44   | 472.72 | F | 1,063.61 | 532.31 | 1,046.58 | 523.79 | 1,045.60 | 523.30 | 7  |
| 8  | 1,091.49 | 546.25 | 1,074.47 | 537.74 | 1,073.48 | 537.25 | E | 916.54   | 458.77 | 899.51   | 450.26 | 898.53   | 449.77 | 6  |
| 9  | 1,190.56 | 595.79 | 1,173.54 | 587.27 | 1,172.55 | 586.78 | V | 787.49   | 394.25 | 770.47   | 385.74 |          |        | 5  |
| 10 | 1,337.63 | 669.32 | 1,320.61 | 660.81 | 1,319.62 | 660.31 | F | 688.43   | 344.72 | 671.40   | 336.20 |          |        | 4  |
| 11 | 1,450.72 | 725.86 | 1,433.69 | 717.35 | 1,432.71 | 716.86 | I | 541.36   | 271.18 | 524.33   | 262.67 |          |        | 3  |
| 12 | 1,587.77 | 794.39 | 1,570.75 | 785.88 | 1,569.76 | 785.39 | H | 428.27   | 214.64 | 411.25   | 206.13 |          |        | 2  |
| 13 |          |        |          |        |          |        | K | 291.21   | 146.11 | 274.19   | 137.60 |          |        | 1  |

Query 37666 Hit 1

MS/MS Fragmentation of **HLEEIVHVEQGR**

Found in **sp|Q01433|AMPD2\_HUMAN**, AMP deaminase 2 OS=Homo sapiens GN=AMPD2 PE=1 SV=2

Match to Query 37666: 1588.849from(530.6238,3+)

Title: 335: Scan 764 (rt=26.8968, f=3, i=114) [D:\lab212\membrane\Grace\Joyce\iTRAQ\_50\_2.raw]

Data File:Submitted from 20120508-1(merge) by Mascot Daemon on JOYCE-VAIO

Monoisotopic mass of neutral peptide Mr(calc): 1588.849

Variable modifications:

Ions Score: 50.28 Expect: 0.008

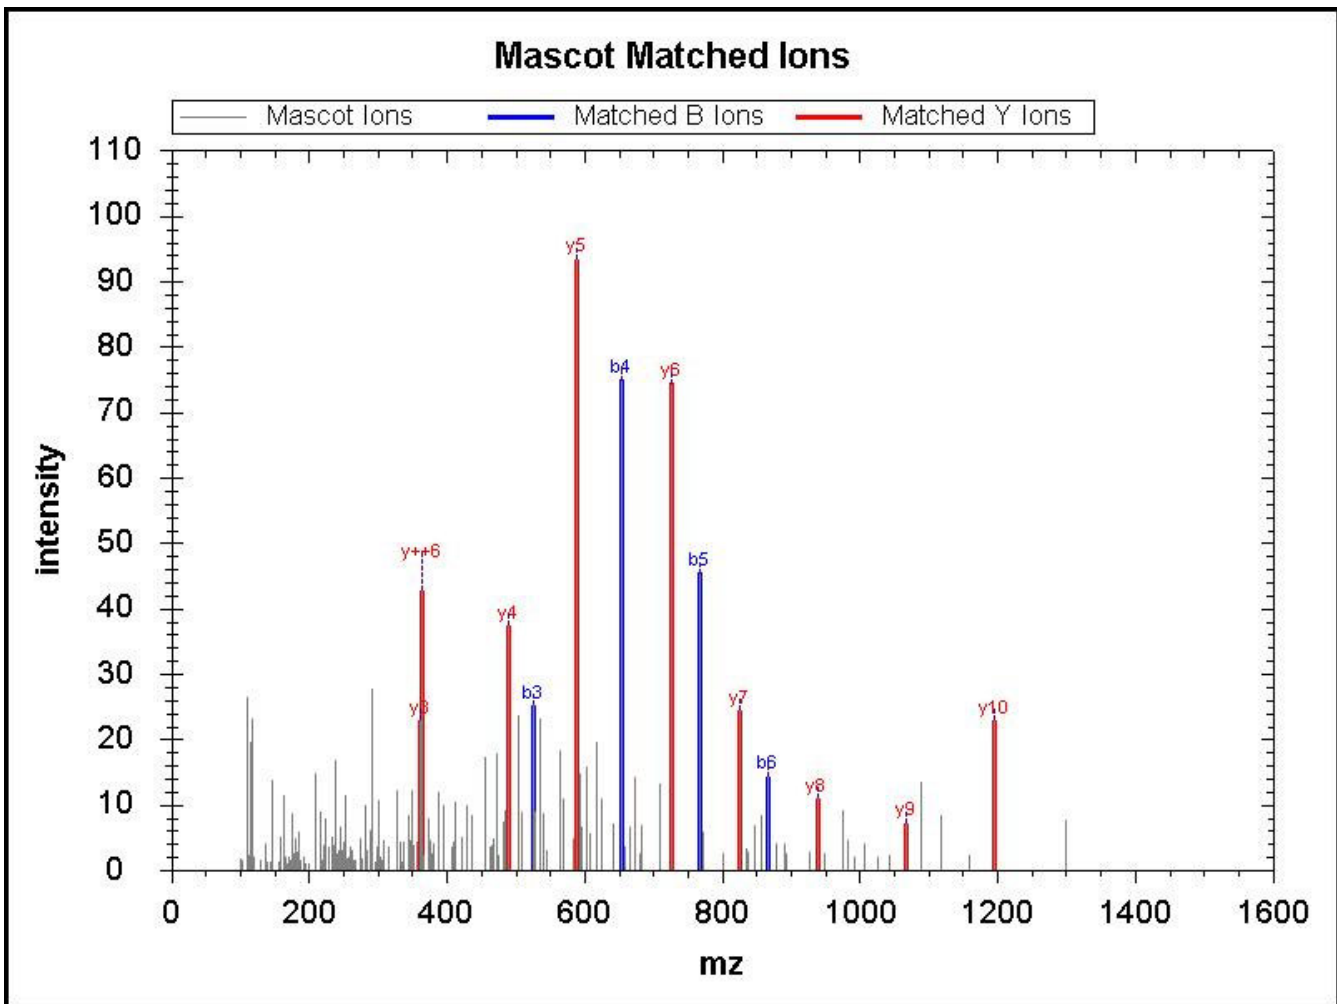

| No | b      | b++    | b* | b*++ | b0     | b0++   | Seq | y        | y++    | y*       | y*++   | y0       | y0++   | RevNo |
|----|--------|--------|----|------|--------|--------|-----|----------|--------|----------|--------|----------|--------|-------|
| 1  | 282.17 | 141.59 |    |      |        |        | H   |          |        |          |        |          |        | 12    |
| 2  | 395.25 | 198.13 |    |      |        |        | L   | 1,308.69 | 654.85 | 1,291.66 | 646.34 | 1,290.68 | 645.84 | 11    |
| 3  | 524.29 | 262.65 |    |      | 506.28 | 253.65 | E   | 1,195.61 | 598.31 | 1,178.58 | 589.79 | 1,177.60 | 589.30 | 10    |

|    |          |        |          |        |          |        |   |          |        |          |        |          |        |   |
|----|----------|--------|----------|--------|----------|--------|---|----------|--------|----------|--------|----------|--------|---|
| 4  | 653.34   | 327.17 |          |        | 635.33   | 318.17 | E | 1,066.56 | 533.79 | 1,049.54 | 525.27 | 1,048.55 | 524.78 | 9 |
| 5  | 766.42   | 383.71 |          |        | 748.41   | 374.71 | I | 937.52   | 469.26 | 920.49   | 460.75 | 919.51   | 460.26 | 8 |
| 6  | 865.49   | 433.25 |          |        | 847.48   | 424.24 | V | 824.44   | 412.72 | 807.41   | 404.21 | 806.43   | 403.72 | 7 |
| 7  | 1,002.55 | 501.78 |          |        | 984.54   | 492.77 | H | 725.37   | 363.19 | 708.34   | 354.67 | 707.36   | 354.18 | 6 |
| 8  | 1,101.62 | 551.31 |          |        | 1,083.61 | 542.31 | V | 588.31   | 294.66 | 571.28   | 286.15 | 570.30   | 285.65 | 5 |
| 9  | 1,230.66 | 615.83 |          |        | 1,212.65 | 606.83 | E | 489.24   | 245.12 | 472.22   | 236.61 | 471.23   | 236.12 | 4 |
| 10 | 1,358.72 | 679.86 | 1,341.69 | 671.35 | 1,340.71 | 670.86 | Q | 360.20   | 180.60 | 343.17   | 172.09 |          |        | 3 |
| 11 | 1,415.74 | 708.37 | 1,398.71 | 699.86 | 1,397.73 | 699.37 | G | 232.14   | 116.57 | 215.11   | 108.06 |          |        | 2 |
| 12 |          |        |          |        |          |        | R | 175.12   | 88.06  | 158.09   | 79.55  |          |        | 1 |

Query 52691 Hit 1

MS/MS Fragmentation of **IQHAVQLATEPLEK**

Found in **sp|P49589|SYCC\_HUMAN**, Cysteine--tRNA ligase

Match to Query 52691: 1864.068from(622.3633,3+)

Title: 548: Scan 1226 (rt=37.2987, f=3, i=191) [D:\lab212\membrane\Grace\Joyce\iTRAQ\_40\_1.raw]

Data File: Submitted from 20120508-1(merge) by Mascot Daemon on JOYCE-VAIO

Monoisotopic mass of neutral peptide Mr(calc): 1864.068

Variable modifications:

K14 iTRAQ4plex (K)

Ions Score: 50.27 Expect: 0.005

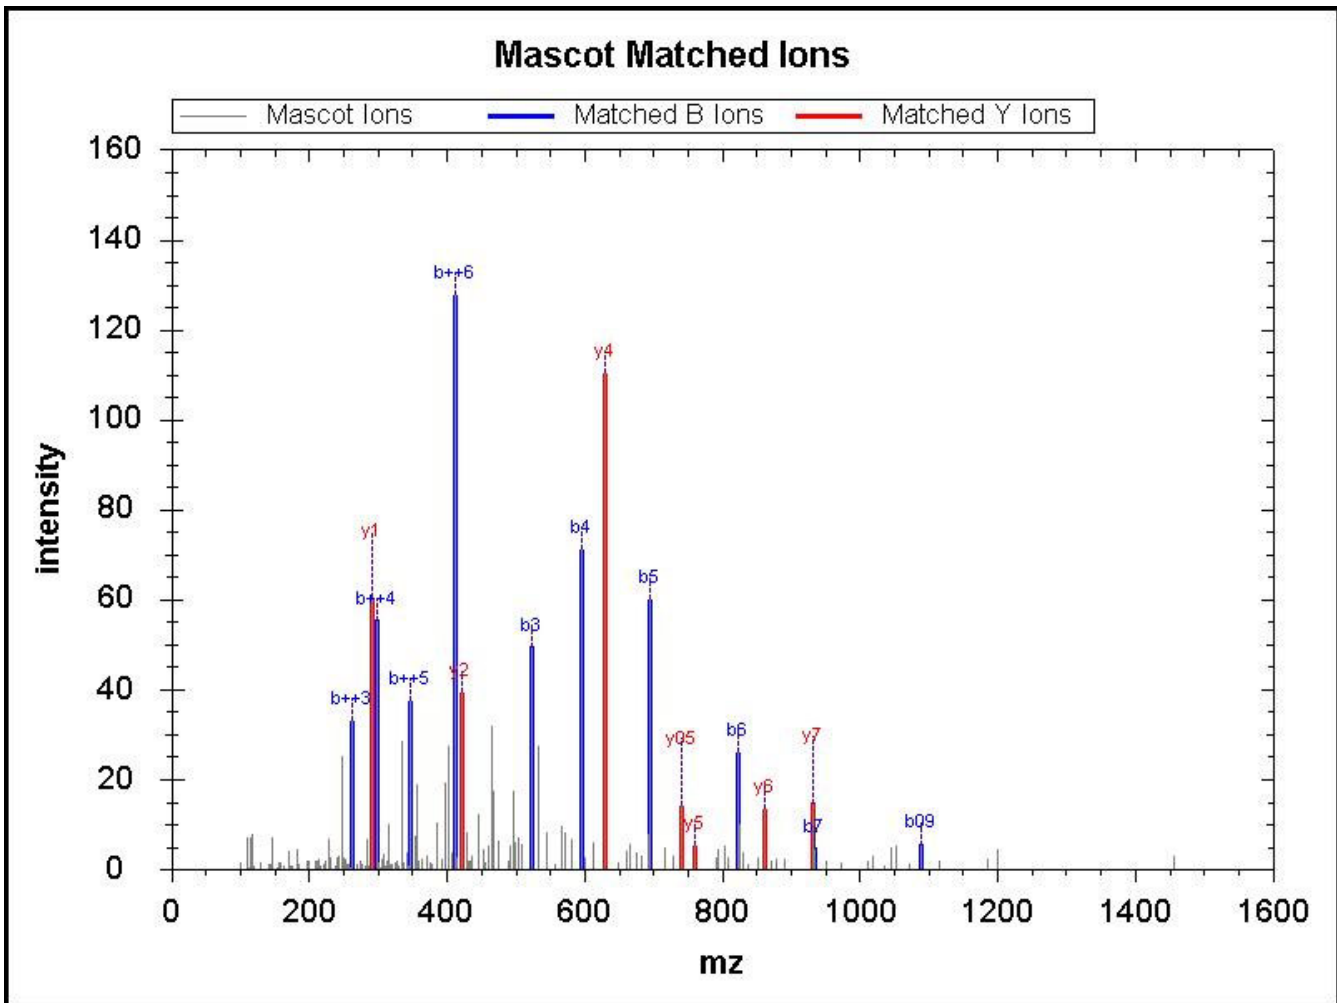

| No | b      | b++    | b*     | b*++   | b0 | b0++ | Seq | y        | y++    | y*       | y*++   | y0       | y0++   | RevNo |
|----|--------|--------|--------|--------|----|------|-----|----------|--------|----------|--------|----------|--------|-------|
| 1  | 258.19 | 129.60 |        |        |    |      | I   |          |        |          |        |          |        | 14    |
| 2  | 386.25 | 193.63 | 369.23 | 185.12 |    |      | Q   | 1,607.89 | 804.45 | 1,590.86 | 795.93 | 1,589.88 | 795.44 | 13    |
| 3  | 523.31 | 262.16 | 506.28 | 253.65 |    |      | H   | 1,479.83 | 740.42 | 1,462.80 | 731.90 | 1,461.82 | 731.41 | 12    |
| 4  | 594.35 | 297.68 | 577.32 | 289.16 |    |      | A   | 1,342.77 | 671.89 | 1,325.74 | 663.38 | 1,324.76 | 662.88 | 11    |
| 5  | 693.42 | 347.21 | 676.39 | 338.70 |    |      | V   | 1,271.73 | 636.37 | 1,254.71 | 627.86 | 1,253.72 | 627.36 | 10    |

|    |          |        |          |        |          |        |   |          |        |          |        |          |        |   |
|----|----------|--------|----------|--------|----------|--------|---|----------|--------|----------|--------|----------|--------|---|
| 6  | 821.47   | 411.24 | 804.45   | 402.73 |          |        | Q | 1,172.66 | 586.84 | 1,155.64 | 578.32 | 1,154.65 | 577.83 | 9 |
| 7  | 934.56   | 467.78 | 917.53   | 459.27 |          |        | L | 1,044.61 | 522.81 | 1,027.58 | 514.29 | 1,026.60 | 513.80 | 8 |
| 8  | 1,005.60 | 503.30 | 988.57   | 494.79 |          |        | A | 931.52   | 466.26 | 914.50   | 457.75 | 913.51   | 457.26 | 7 |
| 9  | 1,106.64 | 553.83 | 1,089.62 | 545.31 | 1,088.63 | 544.82 | T | 860.48   | 430.75 | 843.46   | 422.23 | 842.47   | 421.74 | 6 |
| 10 | 1,235.69 | 618.35 | 1,218.66 | 609.83 | 1,217.68 | 609.34 | E | 759.44   | 380.22 | 742.41   | 371.71 | 741.43   | 371.22 | 5 |
| 11 | 1,332.74 | 666.87 | 1,315.71 | 658.36 | 1,314.73 | 657.87 | P | 630.39   | 315.70 | 613.37   | 307.19 | 612.38   | 306.70 | 4 |
| 12 | 1,445.82 | 723.42 | 1,428.80 | 714.90 | 1,427.81 | 714.41 | L | 533.34   | 267.17 | 516.31   | 258.66 | 515.33   | 258.17 | 3 |
| 13 | 1,574.87 | 787.94 | 1,557.84 | 779.42 | 1,556.86 | 778.93 | E | 420.26   | 210.63 | 403.23   | 202.12 | 402.25   | 201.63 | 2 |
| 14 |          |        |          |        |          |        | K | 291.21   | 146.11 | 274.19   | 137.60 |          |        | 1 |

Query 25904 Hit 1

MS/MS Fragmentation of **LLLEQILNK**

Found in [sp|O43913|ORC5\\_HUMAN](#), Origin recognition complex subunit 5 OS=Homo sapiens GN=ORC5 PE=1 SV=1

Match to Query 25904: 1370.78 from (686.3972, 2+)

Title: 703: Scan 2170 (rt=55.1648, f=3, i=238) [D:\lab212\membrane\Grace\Joyce\iTRAQ\_29\_2.raw]

Data File: Submitted from 20120508-1 (merge) by Mascot Daemon on JOYCE-VAIO

Monoisotopic mass of neutral peptide Mr(calc): 1370.78

Variable modifications:

K9 iTRAQ4plex (K)

Ions Score: 50.24 Expect: 0.006

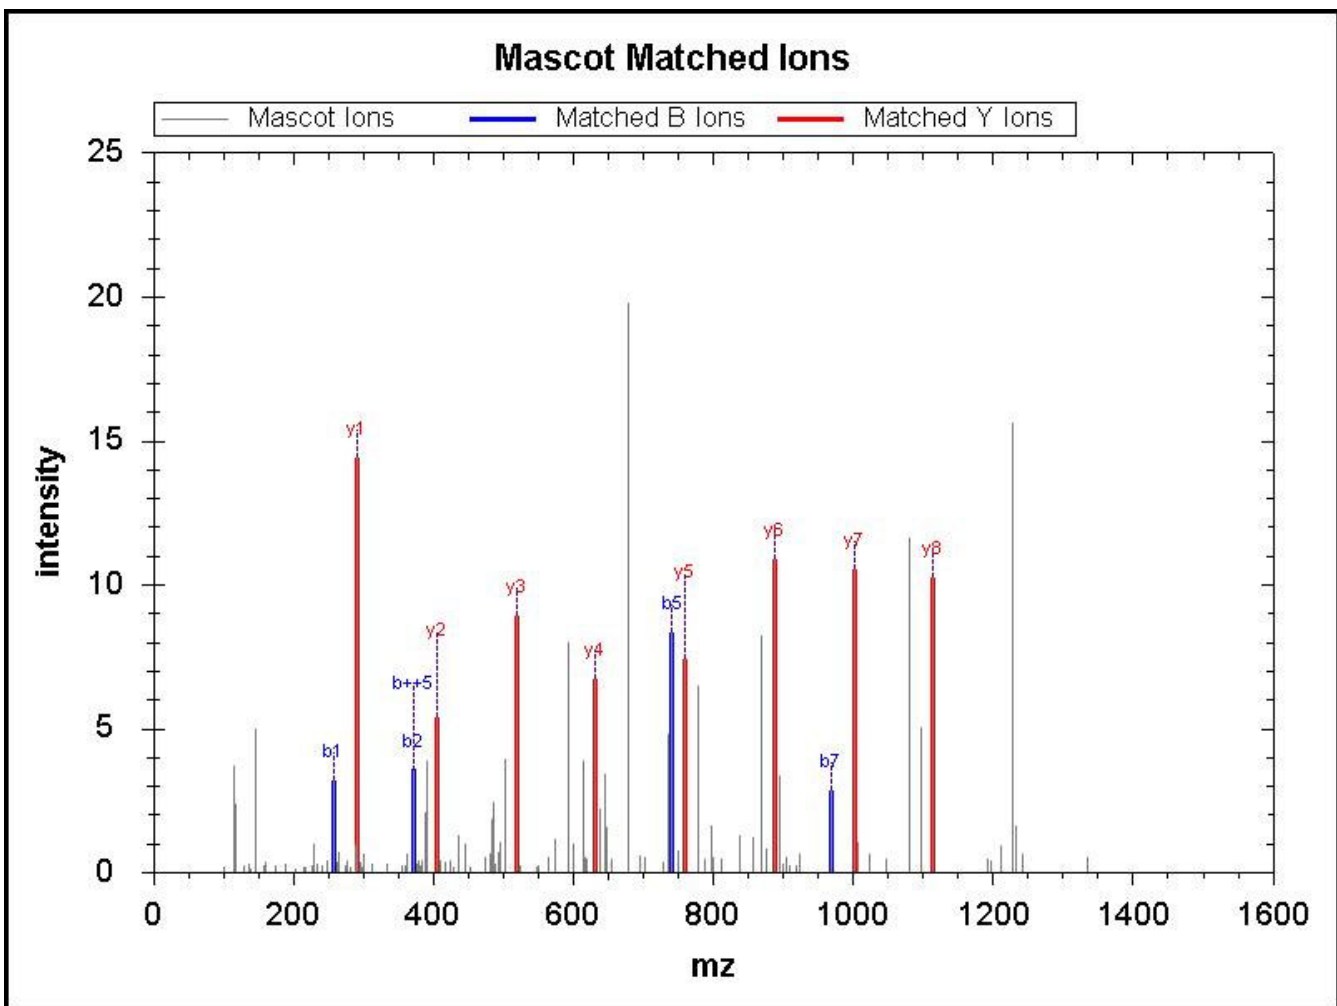

| No | b      | b++    | b*     | b*++   | b0     | b0++   | Seq | y        | y++    | y*       | y*++   | y0       | y0++   | RevNo |
|----|--------|--------|--------|--------|--------|--------|-----|----------|--------|----------|--------|----------|--------|-------|
| 1  | 258.19 | 129.60 |        |        |        |        | L   |          |        |          |        |          |        | 9     |
| 2  | 371.28 | 186.14 |        |        |        |        | L   | 1,114.70 | 557.85 | 1,097.67 | 549.34 | 1,096.68 | 548.85 | 8     |
| 3  | 484.36 | 242.68 |        |        |        |        | L   | 1,001.61 | 501.31 | 984.58   | 492.80 | 983.60   | 492.30 | 7     |
| 4  | 613.40 | 307.21 |        |        | 595.39 | 298.20 | E   | 888.53   | 444.77 | 871.50   | 436.25 | 870.52   | 435.76 | 6     |
| 5  | 741.46 | 371.23 | 724.44 | 362.72 | 723.45 | 362.23 | Q   | 759.48   | 380.25 | 742.46   | 371.73 |          |        | 5     |

|   |          |        |          |        |          |        |   |        |        |        |        |  |  |   |
|---|----------|--------|----------|--------|----------|--------|---|--------|--------|--------|--------|--|--|---|
| 6 | 854.55   | 427.78 | 837.52   | 419.26 | 836.54   | 418.77 | I | 631.43 | 316.22 | 614.40 | 307.70 |  |  | 4 |
| 7 | 967.63   | 484.32 | 950.60   | 475.81 | 949.62   | 475.31 | L | 518.34 | 259.67 | 501.32 | 251.16 |  |  | 3 |
| 8 | 1,081.67 | 541.34 | 1,064.65 | 532.83 | 1,063.66 | 532.34 | N | 405.26 | 203.13 | 388.23 | 194.62 |  |  | 2 |
| 9 |          |        |          |        |          |        | K | 291.21 | 146.11 | 274.19 | 137.60 |  |  | 1 |

Query 40807 Hit 1

MS/MS Fragmentation of **VLGQPHHELDK**

Found in **sp|Q96DH6|MSI2H\_HUMAN**, RNA-binding protein Musashi homolog 2 OS=Homo sapiens GN=MSI2 PE=1 SV=1

Match to Query 40807: 1646.9from(549.9739,3+)

Title: 103: Scan 501 (rt=19.9529, f=2, i=67) [D:\lab212\membrane\Grace\Joyce\iTRAQ\_51\_2.raw]

Data File: Submitted from 20120508-1(merge) by Mascot Daemon on JOYCE-VAIO

Monoisotopic mass of neutral peptide Mr(calc): 1646.9

Variable modifications:

K12 iTRAQ4plex (K)

Ions Score: 50.21 Expect: 0.008

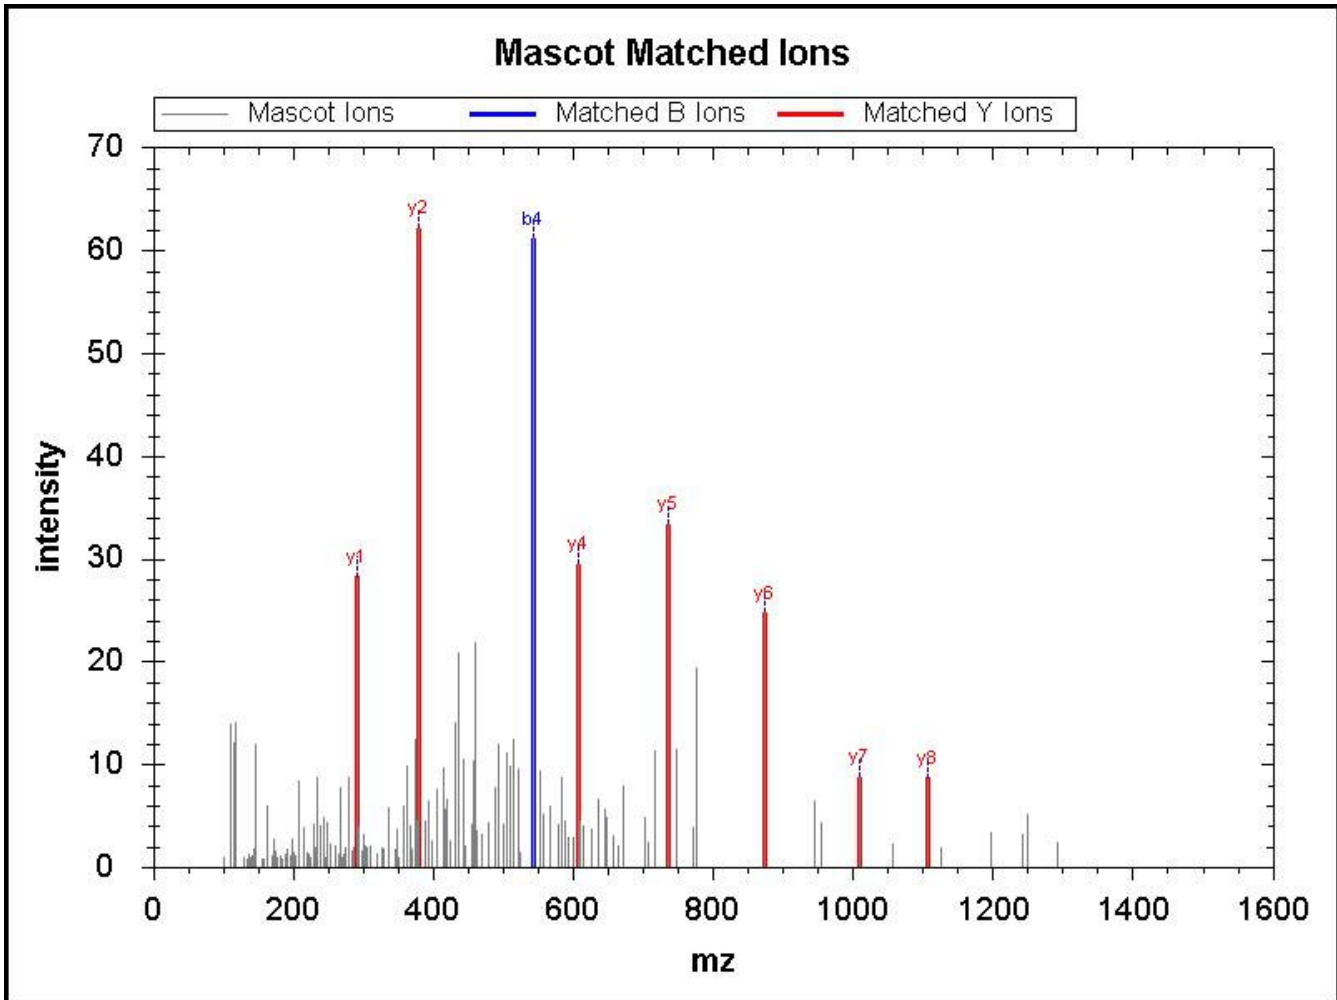

| No | b        | b++    | b*       | b*++   | b0       | b0++   | Seq | y        | y++    | y*       | y*++   | y0       | y0++   | RevNo |
|----|----------|--------|----------|--------|----------|--------|-----|----------|--------|----------|--------|----------|--------|-------|
| 1  | 244.18   | 122.59 |          |        |          |        | V   |          |        |          |        |          |        | 12    |
| 2  | 357.26   | 179.13 |          |        |          |        | L   | 1,404.74 | 702.87 | 1,387.71 | 694.36 | 1,386.72 | 693.87 | 11    |
| 3  | 414.28   | 207.65 |          |        |          |        | G   | 1,291.65 | 646.33 | 1,274.62 | 637.82 | 1,273.64 | 637.32 | 10    |
| 4  | 542.34   | 271.67 | 525.32   | 263.16 |          |        | Q   | 1,234.63 | 617.82 | 1,217.60 | 609.31 | 1,216.62 | 608.81 | 9     |
| 5  | 639.39   | 320.20 | 622.37   | 311.69 |          |        | P   | 1,106.57 | 553.79 | 1,089.54 | 545.28 | 1,088.56 | 544.78 | 8     |
| 6  | 776.45   | 388.73 | 759.43   | 380.22 |          |        | H   | 1,009.52 | 505.26 | 992.49   | 496.75 | 991.51   | 496.26 | 7     |
| 7  | 913.51   | 457.26 | 896.49   | 448.75 |          |        | H   | 872.46   | 436.73 | 855.43   | 428.22 | 854.45   | 427.73 | 6     |
| 8  | 1,042.56 | 521.78 | 1,025.53 | 513.27 | 1,024.54 | 512.78 | E   | 735.40   | 368.20 | 718.37   | 359.69 | 717.39   | 359.20 | 5     |
| 9  | 1,155.64 | 578.32 | 1,138.61 | 569.81 | 1,137.63 | 569.32 | L   | 606.36   | 303.68 | 589.33   | 295.17 | 588.35   | 294.68 | 4     |
| 10 | 1,270.67 | 635.84 | 1,253.64 | 627.32 | 1,252.66 | 626.83 | D   | 493.27   | 247.14 | 476.25   | 238.63 | 475.26   | 238.14 | 3     |

|    |          |        |          |        |          |        |   |        |        |        |        |        |        |   |
|----|----------|--------|----------|--------|----------|--------|---|--------|--------|--------|--------|--------|--------|---|
| 11 | 1,357.70 | 679.35 | 1,340.67 | 670.84 | 1,339.69 | 670.35 | S | 378.25 | 189.63 | 361.22 | 181.11 | 360.24 | 180.62 | 2 |
| 12 |          |        |          |        |          |        | K | 291.21 | 146.11 | 274.19 | 137.60 |        |        | 1 |

Query 20499 Hit 1

MS/MS Fragmentation of **SEVAAENHLR**

Found in **sp|Q14554|PDIA5\_HUMAN**, Protein disulfide-isomerase A5 OS=Homo sapiens GN=PDIA5 PE=1 SV=1

Match to Query 20499: 1268.658from(423.8932,3+)

Title: 101: Sum of 2 scans in range 324 (rt=16.8319, f=4, i=63) to 325 (rt=16.8574, f=4, i=64)

[D:\lab212\membrane\GraceJoyce\iTRAQ\_41\_2.raw]

Data File:Submitted from 20120508-1(merge) by Mascot Daemon on JOYCE-VAIO

Monoisotopic mass of neutral peptide Mr(calc): 1268.658

Variable modifications:

Ions Score: 50.15 Expect: 0.007

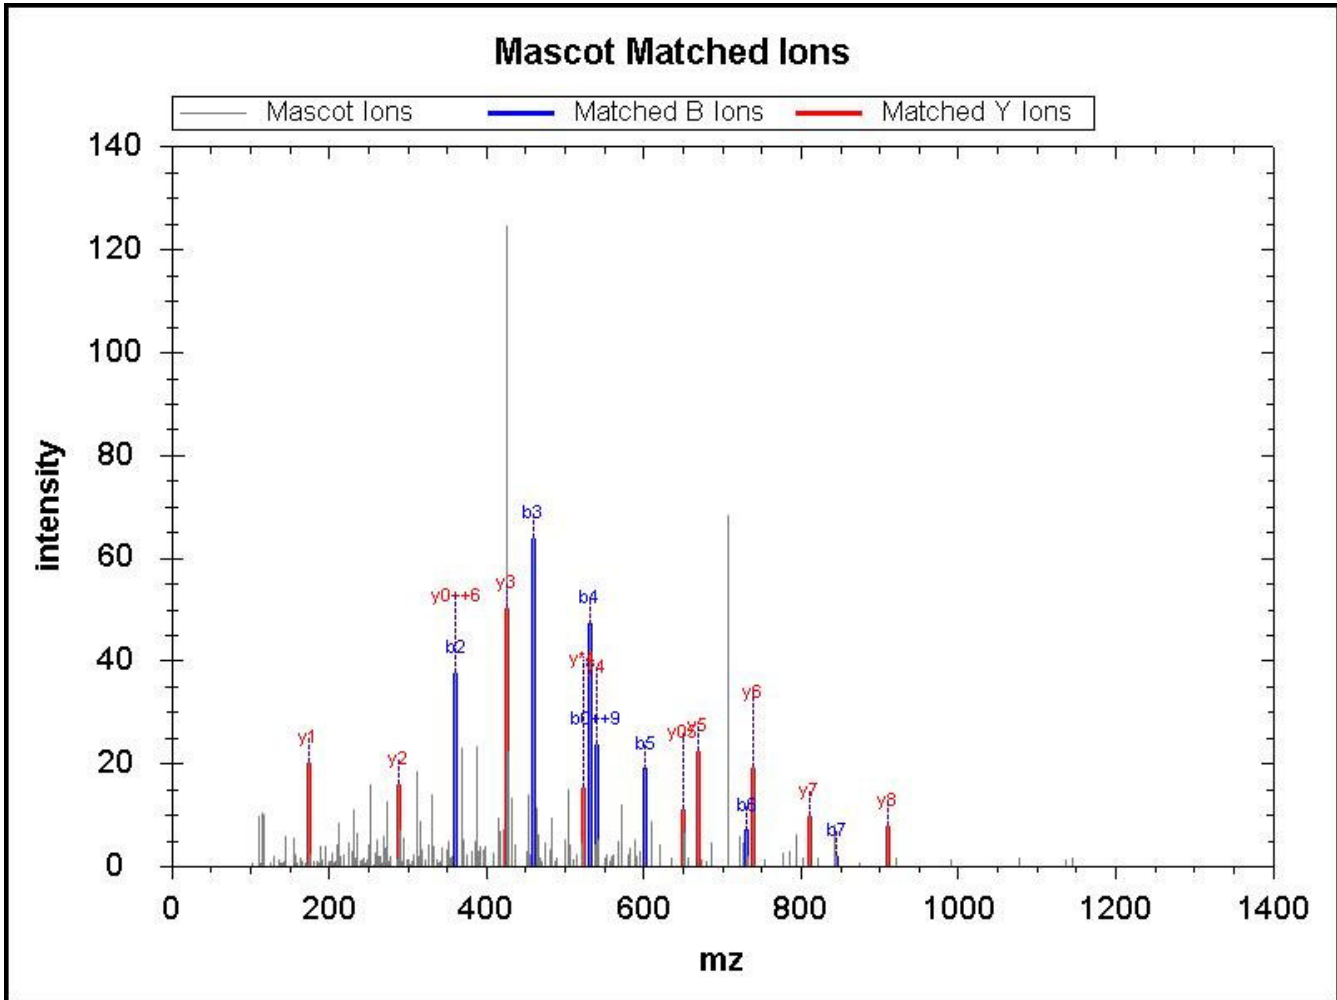

| No | b        | b++    | b*       | b*++   | b0       | b0++   | Seq | y        | y++    | y*       | y*++   | y0       | y0++   | RevNo |
|----|----------|--------|----------|--------|----------|--------|-----|----------|--------|----------|--------|----------|--------|-------|
| 1  | 232.14   | 116.57 |          |        | 214.13   | 107.57 | S   |          |        |          |        |          |        | 10    |
| 2  | 361.18   | 181.10 |          |        | 343.17   | 172.09 | E   | 1,038.53 | 519.77 | 1,021.51 | 511.26 | 1,020.52 | 510.76 | 9     |
| 3  | 460.25   | 230.63 |          |        | 442.24   | 221.62 | V   | 909.49   | 455.25 | 892.46   | 446.74 | 891.48   | 446.24 | 8     |
| 4  | 531.29   | 266.15 |          |        | 513.28   | 257.14 | A   | 810.42   | 405.71 | 793.40   | 397.20 | 792.41   | 396.71 | 7     |
| 5  | 602.33   | 301.67 |          |        | 584.32   | 292.66 | A   | 739.38   | 370.20 | 722.36   | 361.68 | 721.37   | 361.19 | 6     |
| 6  | 731.37   | 366.19 |          |        | 713.36   | 357.18 | E   | 668.35   | 334.68 | 651.32   | 326.16 | 650.34   | 325.67 | 5     |
| 7  | 845.41   | 423.21 | 828.39   | 414.70 | 827.40   | 414.20 | N   | 539.30   | 270.16 | 522.28   | 261.64 |          |        | 4     |
| 8  | 982.47   | 491.74 | 965.44   | 483.23 | 964.46   | 482.73 | H   | 425.26   | 213.13 | 408.24   | 204.62 |          |        | 3     |
| 9  | 1,095.56 | 548.28 | 1,078.53 | 539.77 | 1,077.54 | 539.28 | L   | 288.20   | 144.61 | 271.18   | 136.09 |          |        | 2     |
| 10 |          |        |          |        |          |        | R   | 175.12   | 88.06  | 158.09   | 79.55  |          |        | 1     |

Query 43405 Hit 1

MS/MS Fragmentation of **SQLQDTLIHLIK**

Found in **sp|Q9NPI6|DCP1A\_HUMAN**, mRNA-decapping enzyme 1A OS=Homo sapiens GN=DCP1A PE=1 SV=2

Match to Query 43405: 1696.01 from (566.3438,3+)

Title: 850: Scan 1852 (rt=51.4046, f=3, i=292) [D:\lab212\membrane\Grace\Joyce\iTRAQ\_40\_1.raw]

Data File: Submitted from 20120508-1(merge) by Mascot Daemon on JOYCE-VAIO

Monoisotopic mass of neutral peptide Mr(calc): 1696.01

Variable modifications:

K12 iTRAQ4plex (K)

Ions Score: 50.14 Expect: 0.004

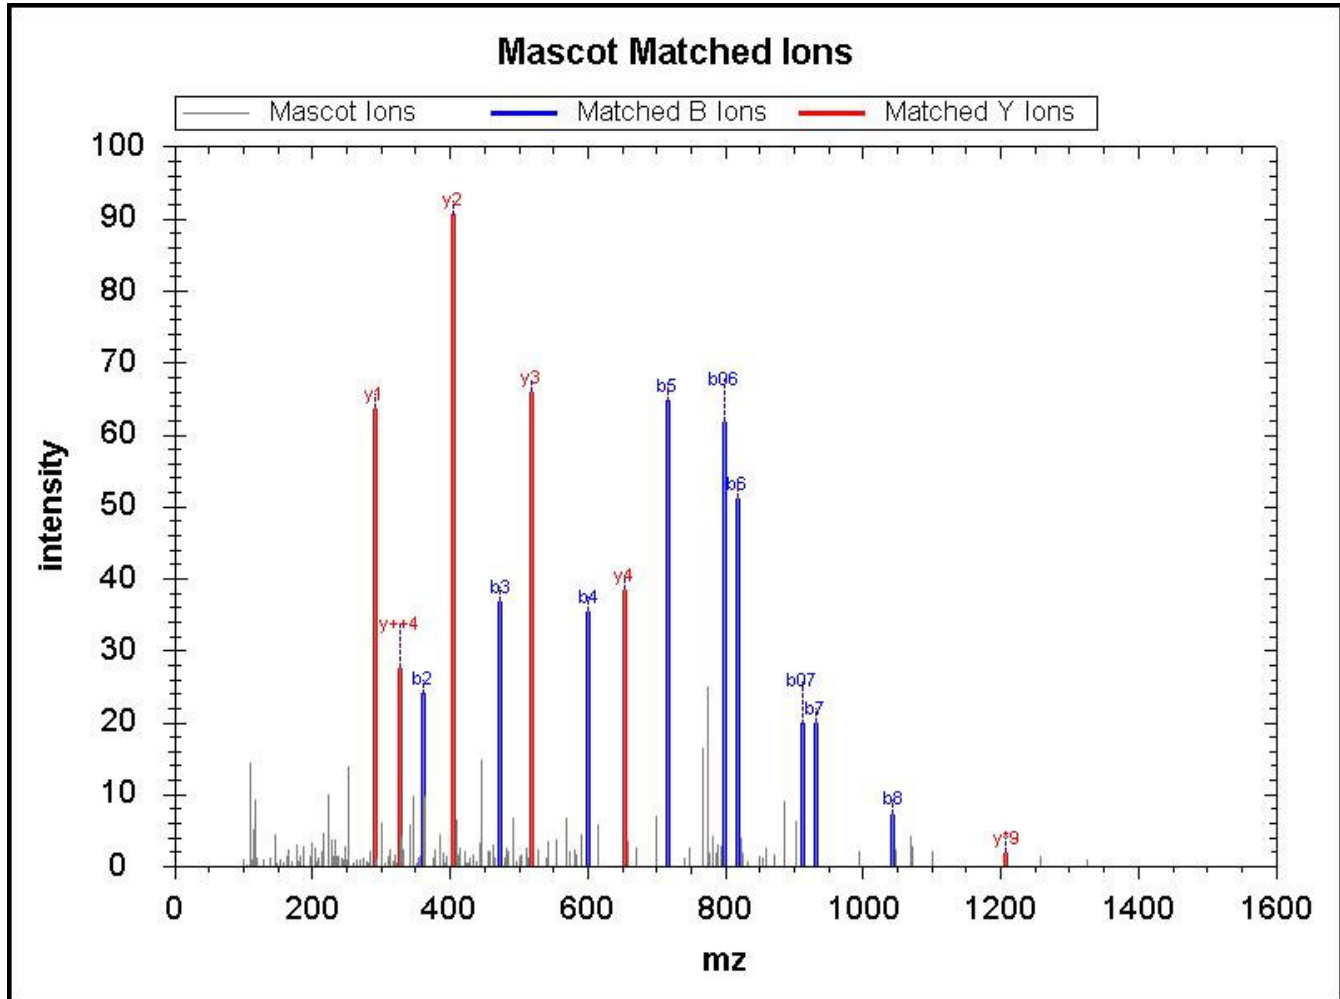

| No | b        | b++    | b*       | b*++   | b0       | b0++   | Seq | y        | y++    | y*       | y*++   | y0       | y0++   | RevNo |
|----|----------|--------|----------|--------|----------|--------|-----|----------|--------|----------|--------|----------|--------|-------|
| 1  | 232.14   | 116.57 |          |        | 214.13   | 107.57 | S   |          |        |          |        |          |        | 12    |
| 2  | 360.20   | 180.60 | 343.17   | 172.09 | 342.19   | 171.60 | Q   | 1,465.89 | 733.45 | 1,448.86 | 724.93 | 1,447.88 | 724.44 | 11    |
| 3  | 473.28   | 237.15 | 456.26   | 228.63 | 455.27   | 228.14 | L   | 1,337.83 | 669.42 | 1,320.80 | 660.90 | 1,319.82 | 660.41 | 10    |
| 4  | 601.34   | 301.17 | 584.32   | 292.66 | 583.33   | 292.17 | Q   | 1,224.74 | 612.88 | 1,207.72 | 604.36 | 1,206.73 | 603.87 | 9     |
| 5  | 716.37   | 358.69 | 699.34   | 350.18 | 698.36   | 349.68 | D   | 1,096.68 | 548.85 | 1,079.66 | 540.33 | 1,078.67 | 539.84 | 8     |
| 6  | 817.42   | 409.21 | 800.39   | 400.70 | 799.41   | 400.21 | T   | 981.66   | 491.33 | 964.63   | 482.82 | 963.65   | 482.33 | 7     |
| 7  | 930.50   | 465.75 | 913.47   | 457.24 | 912.49   | 456.75 | L   | 880.61   | 440.81 | 863.58   | 432.30 |          |        | 6     |
| 8  | 1,043.59 | 522.30 | 1,026.56 | 513.78 | 1,025.57 | 513.29 | I   | 767.53   | 384.27 | 750.50   | 375.75 |          |        | 5     |
| 9  | 1,180.64 | 590.83 | 1,163.62 | 582.31 | 1,162.63 | 581.82 | H   | 654.44   | 327.72 | 637.42   | 319.21 |          |        | 4     |
| 10 | 1,293.73 | 647.37 | 1,276.70 | 638.85 | 1,275.72 | 638.36 | L   | 517.38   | 259.20 | 500.36   | 250.68 |          |        | 3     |
| 11 | 1,406.81 | 703.91 | 1,389.79 | 695.40 | 1,388.80 | 694.90 | I   | 404.30   | 202.65 | 387.27   | 194.14 |          |        | 2     |
| 12 |          |        |          |        |          |        | K   | 291.21   | 146.11 | 274.19   | 137.60 |          |        | 1     |

Query 69579 Hit 1

MS/MS Fragmentation of **WLIKEELEMLVEK**

Found in **sp|P82933|RT09\_HUMAN**, 28S ribosomal protein S9

Match to Query 69579: 2220.247 from (741.0897,3+)



Match to Query 66941: 2158.294from(720.4386,3+)

Title: 731: Scan 1644 (rt=46.6217, f=2, i=266) [D:\lab212\membrane\Grace\Joyce\iTRAQ\_44\_1.raw]

Data File: Submitted from 20120508-1(merge) by Mascot Daemon on JOYCE-VAIO

Monoisotopic mass of neutral peptide Mr(calc): 2158.294

Variable modifications:

K2 :iTRAQ4plex (K)

K15 :iTRAQ4plex (K)

Ions Score: 50.05 Expect: 0.002

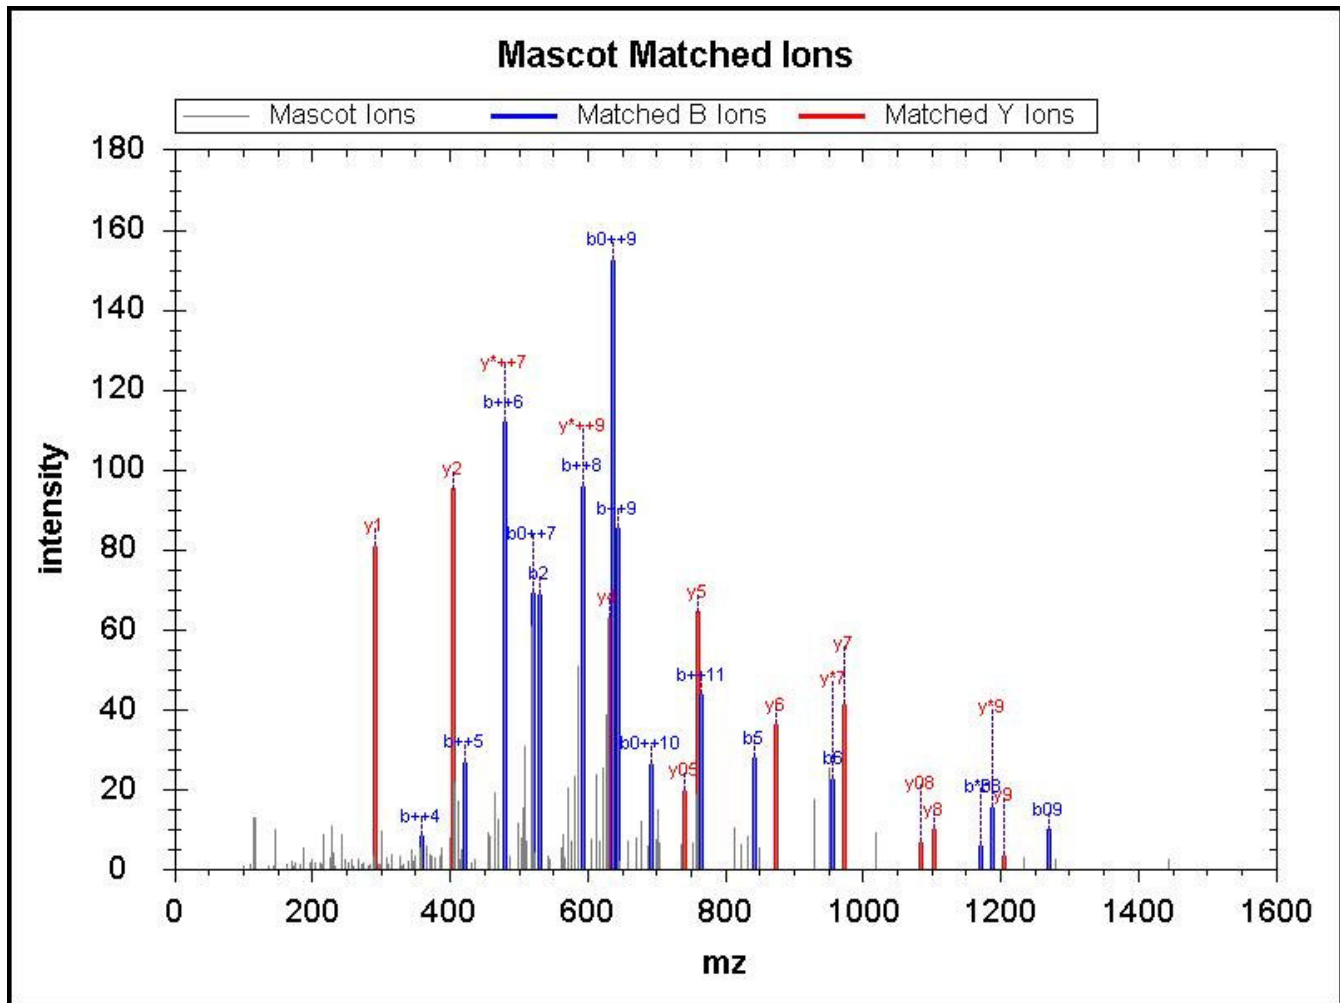

| No | b        | b++    | b*       | b*++   | b0       | b0++   | Seq | y        | y++    | y*       | y*++   | y0       | y0++   | RevNo |
|----|----------|--------|----------|--------|----------|--------|-----|----------|--------|----------|--------|----------|--------|-------|
| 1  | 258.19   | 129.60 |          |        |          |        | I   |          |        |          |        |          |        | 15    |
| 2  | 530.39   | 265.70 | 513.36   | 257.19 |          |        | K   | 1,902.11 | 951.56 | 1,885.09 | 943.05 | 1,884.10 | 942.56 | 14    |
| 3  | 627.44   | 314.23 | 610.42   | 305.71 |          |        | P   | 1,629.92 | 815.46 | 1,612.89 | 806.95 | 1,611.91 | 806.46 | 13    |
| 4  | 714.48   | 357.74 | 697.45   | 349.23 | 696.46   | 348.74 | S   | 1,532.87 | 766.94 | 1,515.84 | 758.42 | 1,514.85 | 757.93 | 12    |
| 5  | 842.53   | 421.77 | 825.51   | 413.26 | 824.52   | 412.77 | Q   | 1,445.83 | 723.42 | 1,428.81 | 714.91 | 1,427.82 | 714.41 | 11    |
| 6  | 956.58   | 478.79 | 939.55   | 470.28 | 938.57   | 469.79 | N   | 1,317.77 | 659.39 | 1,300.75 | 650.88 | 1,299.76 | 650.39 | 10    |
| 7  | 1,057.62 | 529.32 | 1,040.60 | 520.80 | 1,039.61 | 520.31 | T   | 1,203.73 | 602.37 | 1,186.71 | 593.86 | 1,185.72 | 593.36 | 9     |
| 8  | 1,186.67 | 593.84 | 1,169.64 | 585.32 | 1,168.66 | 584.83 | E   | 1,102.68 | 551.85 | 1,085.66 | 543.33 | 1,084.67 | 542.84 | 8     |
| 9  | 1,287.71 | 644.36 | 1,270.69 | 635.85 | 1,269.70 | 635.36 | T   | 973.64   | 487.32 | 956.61   | 478.81 | 955.63   | 478.32 | 7     |
| 10 | 1,400.80 | 700.90 | 1,383.77 | 692.39 | 1,382.79 | 691.90 | L   | 872.59   | 436.80 | 855.57   | 428.29 | 854.58   | 427.80 | 6     |
| 11 | 1,529.84 | 765.42 | 1,512.82 | 756.91 | 1,511.83 | 756.42 | E   | 759.51   | 380.26 | 742.48   | 371.75 | 741.50   | 371.25 | 5     |
| 12 | 1,642.93 | 821.97 | 1,625.90 | 813.45 | 1,624.92 | 812.96 | L   | 630.47   | 315.74 | 613.44   | 307.22 |          |        | 4     |
| 13 | 1,756.01 | 878.51 | 1,738.98 | 870.00 | 1,738.00 | 869.50 | L   | 517.38   | 259.20 | 500.36   | 250.68 |          |        | 3     |
| 14 | 1,869.09 | 935.05 | 1,852.07 | 926.54 | 1,851.08 | 926.05 | L   | 404.30   | 202.65 | 387.27   | 194.14 |          |        | 2     |
| 15 |          |        |          |        |          |        | K   | 291.21   | 146.11 | 274.19   | 137.60 |          |        | 1     |



MS/MS Fragmentation of **LNISEVDEQVR**

Found in **sp|Q01432|AMPD3\_HUMAN**, AMP deaminase 3 OS=Homo sapiens GN=AMPD3 PE=1 SV=1

Match to Query 29962: 1445.71 from (723.8621,2+)

Title: 257: Scan 670 (rt=24.4366, f=3, i=89) [D:\lab212\membrane\Grace\Joyce\iTRAQ\_25\_2.raw]

Data File: Submitted from 20120508-1(merge) by Mascot Daemon on JOYCE-VAIO

Monoisotopic mass of neutral peptide Mr(calc): 1445.71

Variable modifications:

Q9 :Deamidated (NQ)

Ions Score: 49.93 Expect: 0.008

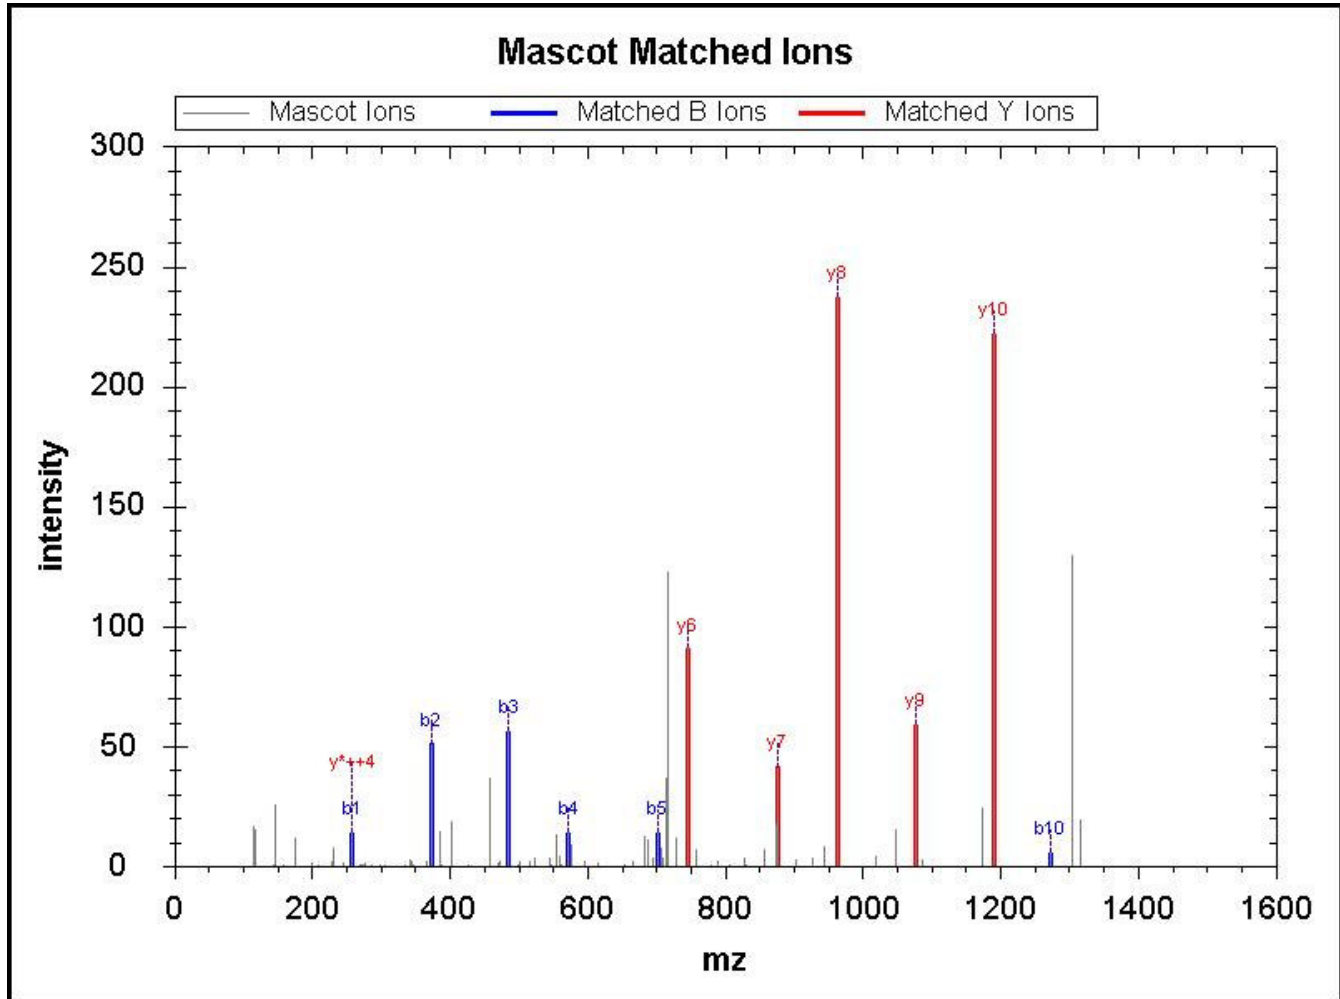

| No | b        | b++    | b*       | b*++   | b0       | b0++   | Seq | y        | y++    | y*       | y*++   | y0       | y0++   | RevNo |
|----|----------|--------|----------|--------|----------|--------|-----|----------|--------|----------|--------|----------|--------|-------|
| 1  | 258.19   | 129.60 |          |        |          |        | L   |          |        |          |        |          |        | 11    |
| 2  | 372.24   | 186.62 | 355.21   | 178.11 |          |        | N   | 1,189.57 | 595.29 | 1,172.54 | 586.78 | 1,171.56 | 586.28 | 10    |
| 3  | 485.32   | 243.16 | 468.29   | 234.65 |          |        | I   | 1,075.53 | 538.27 | 1,058.50 | 529.75 | 1,057.52 | 529.26 | 9     |
| 4  | 572.35   | 286.68 | 555.33   | 278.17 | 554.34   | 277.67 | S   | 962.44   | 481.72 | 945.42   | 473.21 | 944.43   | 472.72 | 8     |
| 5  | 701.40   | 351.20 | 684.37   | 342.69 | 683.38   | 342.20 | E   | 875.41   | 438.21 | 858.38   | 429.70 | 857.40   | 429.20 | 7     |
| 6  | 800.46   | 400.74 | 783.44   | 392.22 | 782.45   | 391.73 | V   | 746.37   | 373.69 | 729.34   | 365.17 | 728.36   | 364.68 | 6     |
| 7  | 915.49   | 458.25 | 898.46   | 449.74 | 897.48   | 449.24 | D   | 647.30   | 324.15 | 630.27   | 315.64 | 629.29   | 315.15 | 5     |
| 8  | 1,044.53 | 522.77 | 1,027.51 | 514.26 | 1,026.52 | 513.76 | E   | 532.27   | 266.64 | 515.25   | 258.13 | 514.26   | 257.63 | 4     |
| 9  | 1,173.58 | 587.29 | 1,156.55 | 578.78 | 1,155.56 | 578.29 | Q   | 403.23   | 202.12 | 386.20   | 193.61 |          |        | 3     |
| 10 | 1,272.64 | 636.83 | 1,255.62 | 628.31 | 1,254.63 | 627.82 | V   | 274.19   | 137.60 | 257.16   | 129.08 |          |        | 2     |
| 11 |          |        |          |        |          |        | R   | 175.12   | 88.06  | 158.09   | 79.55  |          |        | 1     |

Query 48188 Hit 1

MS/MS Fragmentation of **KLEEALMADILSR**

Found in **sp|Q9UBB5|MBD2\_HUMAN**, Methyl-CpG-binding domain protein 2 OS=Homo sapiens GN=MBD2 PE=1 SV=1

Match to Query 48188: 1776.007 from (593.0096,3+)

Title: 934: Sum of 2 scans in range 2029 (rt=55.4513, f=4, i=630) to 2030 (rt=55.4767, f=4, i=631)

[D:\lab212\membrane\Grace\Joyce\iTRAQ\_43\_1.raw]

Data File: Submitted from 20120508-1(merge) by Mascot Daemon on JOYCE-VAIO

Monoisotopic mass of neutral peptide Mr(calc): 1776.007

Variable modifications:

K1 iTRAQ4plex (K)

Ions Score: 49.86 Expect: 0.007

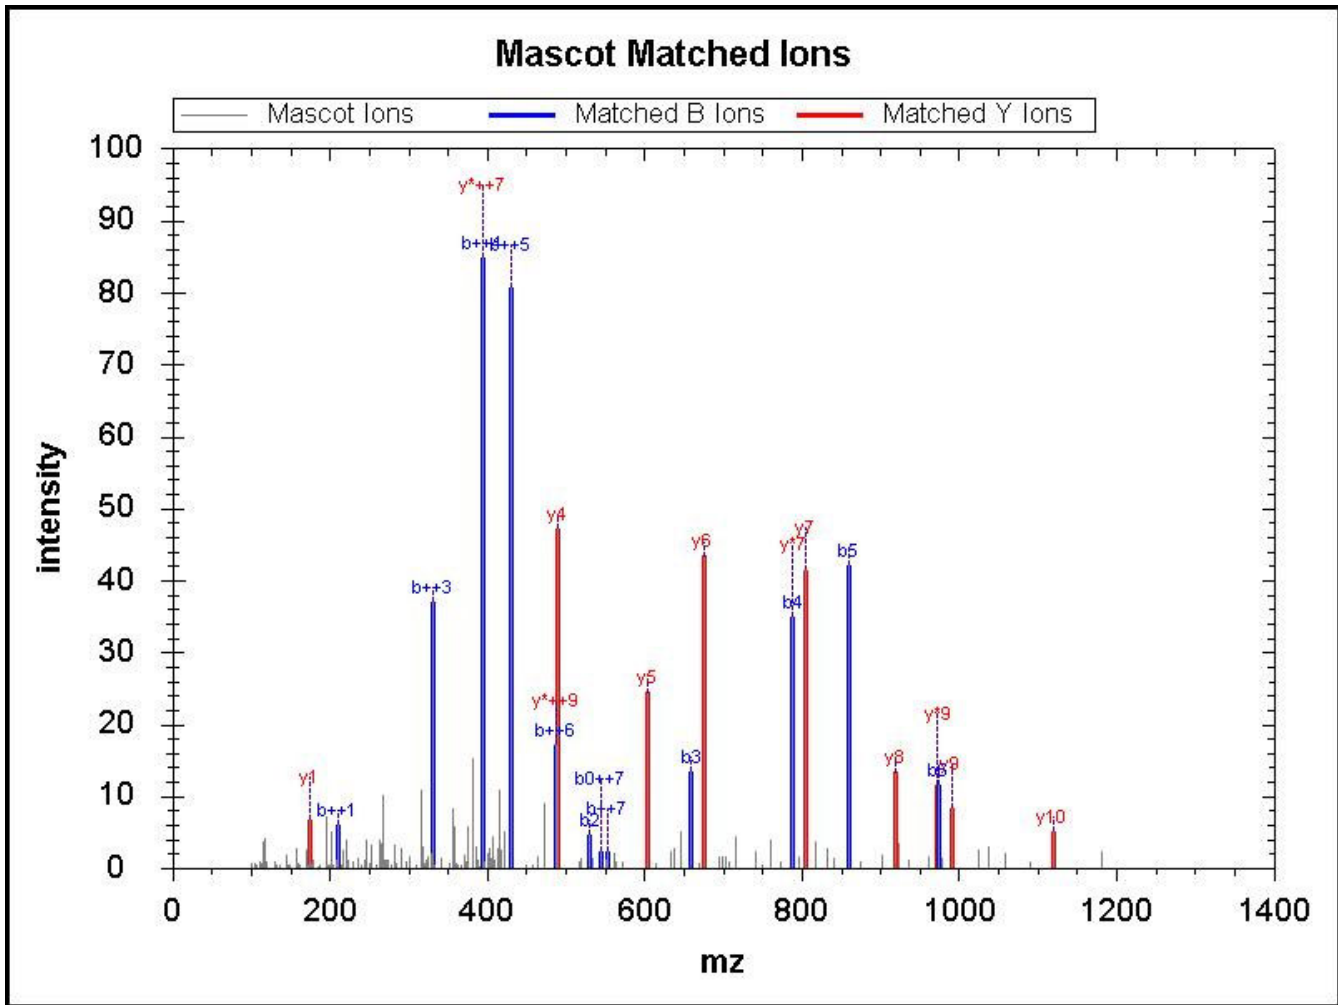

| No | b        | b++    | b*       | b*++   | b0       | b0++   | Seq | y        | y++    | y*       | y*++   | y0       | y0++   | RevNo |
|----|----------|--------|----------|--------|----------|--------|-----|----------|--------|----------|--------|----------|--------|-------|
| 1  | 417.31   | 209.16 | 400.28   | 200.64 |          |        | K   |          |        |          |        |          |        | 13    |
| 2  | 530.39   | 265.70 | 513.36   | 257.19 |          |        | L   | 1,360.71 | 680.86 | 1,343.69 | 672.35 | 1,342.70 | 671.86 | 12    |
| 3  | 659.43   | 330.22 | 642.41   | 321.71 | 641.42   | 321.21 | E   | 1,247.63 | 624.32 | 1,230.60 | 615.81 | 1,229.62 | 615.31 | 11    |
| 4  | 788.48   | 394.74 | 771.45   | 386.23 | 770.47   | 385.74 | E   | 1,118.59 | 559.80 | 1,101.56 | 551.28 | 1,100.58 | 550.79 | 10    |
| 5  | 859.51   | 430.26 | 842.49   | 421.75 | 841.50   | 421.25 | A   | 989.54   | 495.28 | 972.52   | 486.76 | 971.53   | 486.27 | 9     |
| 6  | 972.60   | 486.80 | 955.57   | 478.29 | 954.59   | 477.80 | L   | 918.51   | 459.76 | 901.48   | 451.24 | 900.50   | 450.75 | 8     |
| 7  | 1,103.64 | 552.32 | 1,086.61 | 543.81 | 1,085.63 | 543.32 | M   | 805.42   | 403.22 | 788.40   | 394.70 | 787.41   | 394.21 | 7     |
| 8  | 1,174.67 | 587.84 | 1,157.65 | 579.33 | 1,156.66 | 578.84 | A   | 674.38   | 337.70 | 657.36   | 329.18 | 656.37   | 328.69 | 6     |
| 9  | 1,289.70 | 645.35 | 1,272.67 | 636.84 | 1,271.69 | 636.35 | D   | 603.35   | 302.18 | 586.32   | 293.66 | 585.34   | 293.17 | 5     |
| 10 | 1,402.79 | 701.90 | 1,385.76 | 693.38 | 1,384.77 | 692.89 | I   | 488.32   | 244.66 | 471.29   | 236.15 | 470.31   | 235.66 | 4     |
| 11 | 1,515.87 | 758.44 | 1,498.84 | 749.93 | 1,497.86 | 749.43 | L   | 375.24   | 188.12 | 358.21   | 179.61 | 357.22   | 179.12 | 3     |
| 12 | 1,602.90 | 801.95 | 1,585.88 | 793.44 | 1,584.89 | 792.95 | S   | 262.15   | 131.58 | 245.12   | 123.07 | 244.14   | 122.57 | 2     |
| 13 |          |        |          |        |          |        | R   | 175.12   | 88.06  | 158.09   | 79.55  |          |        | 1     |

Query 56216 Hit 1

MS/MS Fragmentation of FLVLATDGLWETMHR

Found in sp|Q9POJ1|PDP1\_HUMAN, [Pyruvate dehydrogenase [acetyl-transferring]]-phosphatase 1

Match to Query 56216: 1932.005from(645.0089,3+)

Title: 1038: Sum of 2 scans in range 2298 (rt=61.1505, f=4, i=697) to 2299 (rt=61.1759, f=4, i=698)

[D:\lab212\membrane\Grace\Joyce\iTRAQ\_33\_1.raw]

Data File: Submitted from 20120508-1(merge) by Mascot Daemon on JOYCE-VAIO

Monoisotopic mass of neutral peptide Mr(calc): 1932.005

Variable modifications:

Ions Score: 49.7 Expect: 0.010

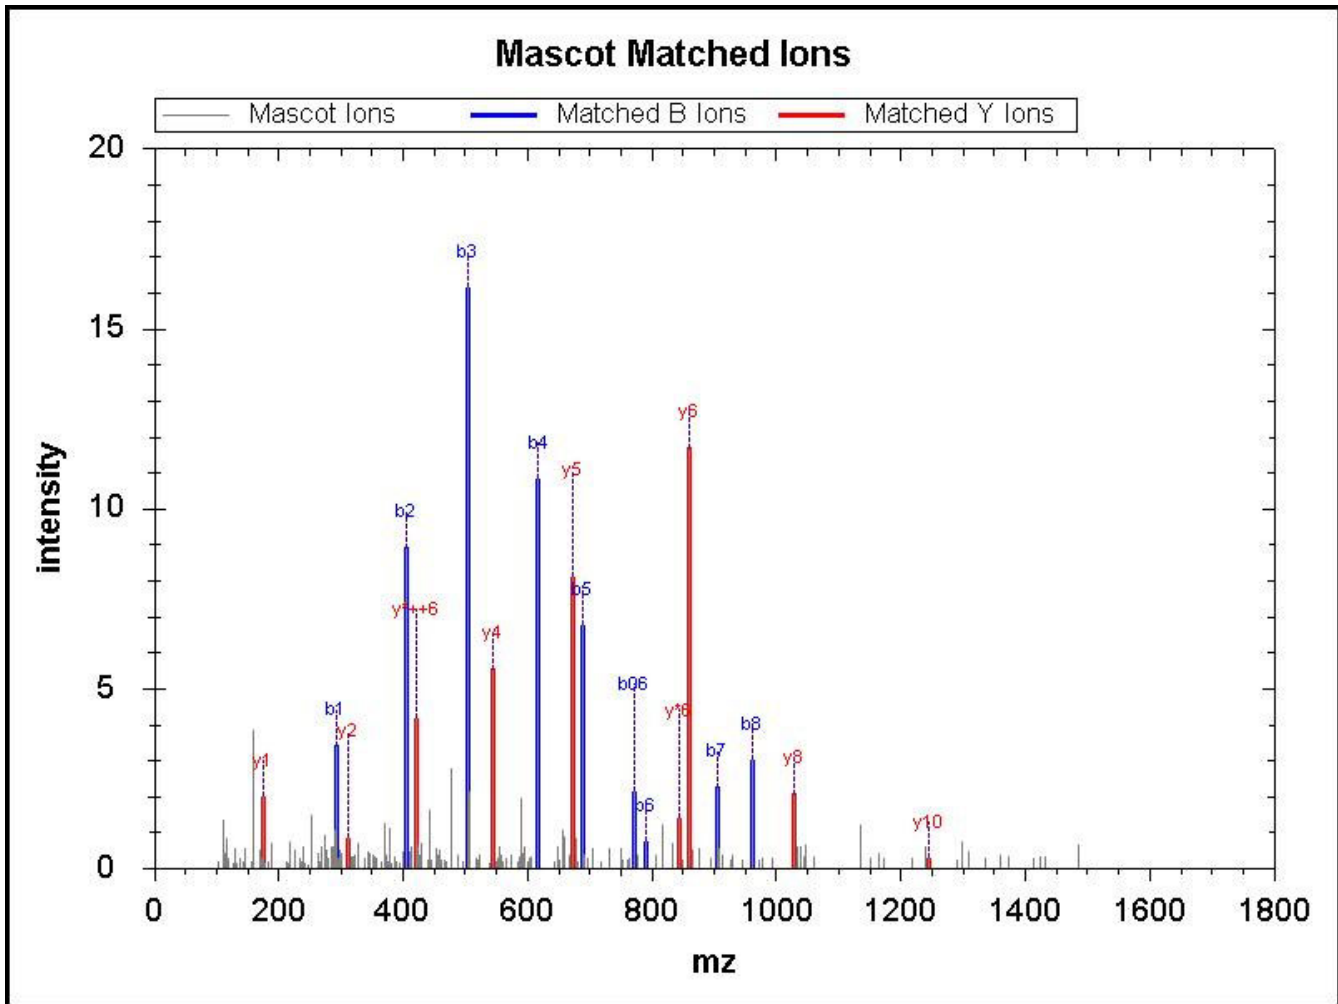

| No | b        | b++    | b0       | b0++   | Seq | y        | y++    | y*       | y*++   | y0       | y0++   | RevNo |
|----|----------|--------|----------|--------|-----|----------|--------|----------|--------|----------|--------|-------|
| 1  | 292.18   | 146.59 |          |        | F   |          |        |          |        |          |        | 15    |
| 2  | 405.26   | 203.13 |          |        | L   | 1,641.84 | 821.42 | 1,624.82 | 812.91 | 1,623.83 | 812.42 | 14    |
| 3  | 504.33   | 252.67 |          |        | V   | 1,528.76 | 764.88 | 1,511.73 | 756.37 | 1,510.75 | 755.88 | 13    |
| 4  | 617.41   | 309.21 |          |        | L   | 1,429.69 | 715.35 | 1,412.66 | 706.84 | 1,411.68 | 706.34 | 12    |
| 5  | 688.45   | 344.73 |          |        | A   | 1,316.61 | 658.81 | 1,299.58 | 650.29 | 1,298.59 | 649.80 | 11    |
| 6  | 789.50   | 395.25 | 771.49   | 386.25 | T   | 1,245.57 | 623.29 | 1,228.54 | 614.77 | 1,227.56 | 614.28 | 10    |
| 7  | 904.53   | 452.77 | 886.52   | 443.76 | D   | 1,144.52 | 572.76 | 1,127.49 | 564.25 | 1,126.51 | 563.76 | 9     |
| 8  | 961.55   | 481.28 | 943.54   | 472.27 | G   | 1,029.49 | 515.25 | 1,012.47 | 506.74 | 1,011.48 | 506.25 | 8     |
| 9  | 1,074.63 | 537.82 | 1,056.62 | 528.81 | L   | 972.47   | 486.74 | 955.45   | 478.23 | 954.46   | 477.73 | 7     |
| 10 | 1,260.71 | 630.86 | 1,242.70 | 621.85 | W   | 859.39   | 430.20 | 842.36   | 421.68 | 841.38   | 421.19 | 6     |
| 11 | 1,389.75 | 695.38 | 1,371.74 | 686.38 | E   | 673.31   | 337.16 | 656.28   | 328.64 | 655.30   | 328.15 | 5     |
| 12 | 1,490.80 | 745.90 | 1,472.79 | 736.90 | T   | 544.27   | 272.64 | 527.24   | 264.12 | 526.26   | 263.63 | 4     |
| 13 | 1,621.84 | 811.42 | 1,603.83 | 802.42 | M   | 443.22   | 222.11 | 426.19   | 213.60 |          |        | 3     |
| 14 | 1,758.90 | 879.95 | 1,740.89 | 870.95 | H   | 312.18   | 156.59 | 295.15   | 148.08 |          |        | 2     |
| 15 |          |        |          |        | R   | 175.12   | 88.06  | 158.09   | 79.55  |          |        | 1     |

Query 65417 Hit 1

MS/MS Fragmentation of **GVTDNVVDTVVHYVPLPR**

Found in **sp|O60240|PLIN1\_HUMAN**, Perilipin-1 OS=Homo sapiens GN=PLIN1 PE=2 SV=2

Match to Query 65417: 2123.15from(708.7241,3+)

Title: 902: Sum of 2 scans in range 2015 (rt=54.7534, f=4, i=605) to 2016 (rt=54.7788, f=4, i=606)

[D:\lab212\membrane\GraceJoyce\iTRAQ\_31\_2.raw]

Data File: Submitted from 20120508-1(merge) by Mascot Daemon on JOYCE-VAIO

Monoisotopic mass of neutral peptide Mr(calc): 2123.15

Variable modifications:

Ions Score: 49.7 Expect: 0.009

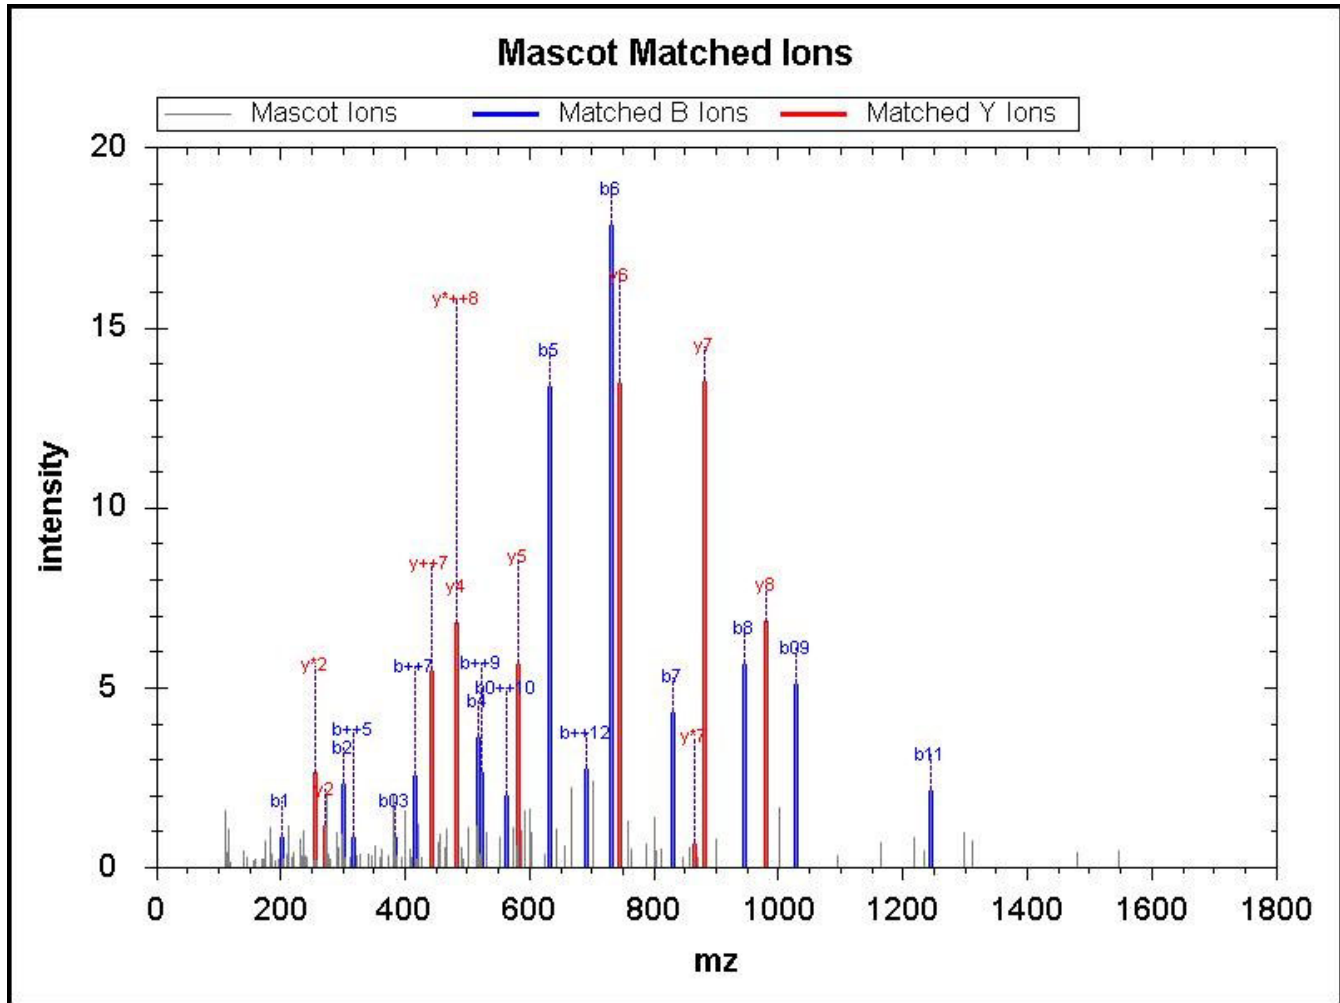

| No | b        | b++    | b*       | b*++   | b0       | b0++   | Seq | y        | y++    | y*       | y*++   | y0       | y0++   | RevNo |
|----|----------|--------|----------|--------|----------|--------|-----|----------|--------|----------|--------|----------|--------|-------|
| 1  | 202.13   | 101.57 |          |        |          |        | G   |          |        |          |        |          |        | 18    |
| 2  | 301.20   | 151.10 |          |        |          |        | V   | 1,923.03 | 962.02 | 1,906.01 | 953.51 | 1,905.02 | 953.02 | 17    |
| 3  | 402.25   | 201.63 |          |        | 384.24   | 192.62 | T   | 1,823.96 | 912.49 | 1,806.94 | 903.97 | 1,805.95 | 903.48 | 16    |
| 4  | 517.27   | 259.14 |          |        | 499.26   | 250.14 | D   | 1,722.92 | 861.96 | 1,705.89 | 853.45 | 1,704.91 | 852.96 | 15    |
| 5  | 631.32   | 316.16 | 614.29   | 307.65 | 613.31   | 307.16 | N   | 1,607.89 | 804.45 | 1,590.86 | 795.94 | 1,589.88 | 795.44 | 14    |
| 6  | 730.39   | 365.70 | 713.36   | 357.18 | 712.37   | 356.69 | V   | 1,493.85 | 747.43 | 1,476.82 | 738.91 | 1,475.84 | 738.42 | 13    |
| 7  | 829.45   | 415.23 | 812.43   | 406.72 | 811.44   | 406.23 | V   | 1,394.78 | 697.89 | 1,377.75 | 689.38 | 1,376.77 | 688.89 | 12    |
| 8  | 944.48   | 472.74 | 927.45   | 464.23 | 926.47   | 463.74 | D   | 1,295.71 | 648.36 | 1,278.68 | 639.85 | 1,277.70 | 639.35 | 11    |
| 9  | 1,045.53 | 523.27 | 1,028.50 | 514.75 | 1,027.52 | 514.26 | T   | 1,180.68 | 590.85 | 1,163.66 | 582.33 | 1,162.67 | 581.84 | 10    |
| 10 | 1,144.60 | 572.80 | 1,127.57 | 564.29 | 1,126.59 | 563.80 | V   | 1,079.64 | 540.32 | 1,062.61 | 531.81 |          |        | 9     |
| 11 | 1,243.66 | 622.34 | 1,226.64 | 613.82 | 1,225.65 | 613.33 | V   | 980.57   | 490.79 | 963.54   | 482.27 |          |        | 8     |
| 12 | 1,380.72 | 690.87 | 1,363.70 | 682.35 | 1,362.71 | 681.86 | H   | 881.50   | 441.25 | 864.47   | 432.74 |          |        | 7     |
| 13 | 1,543.79 | 772.40 | 1,526.76 | 763.88 | 1,525.78 | 763.39 | Y   | 744.44   | 372.72 | 727.41   | 364.21 |          |        | 6     |
| 14 | 1,642.86 | 821.93 | 1,625.83 | 813.42 | 1,624.84 | 812.93 | V   | 581.38   | 291.19 | 564.35   | 282.68 |          |        | 5     |
| 15 | 1,739.91 | 870.46 | 1,722.88 | 861.94 | 1,721.90 | 861.45 | P   | 482.31   | 241.66 | 465.28   | 233.14 |          |        | 4     |
| 16 | 1,852.99 | 927.00 | 1,835.97 | 918.49 | 1,834.98 | 917.99 | L   | 385.26   | 193.13 | 368.23   | 184.62 |          |        | 3     |
| 17 | 1,950.05 | 975.53 | 1,933.02 | 967.01 | 1,932.03 | 966.52 | P   | 272.17   | 136.59 | 255.15   | 128.08 |          |        | 2     |

|    |  |  |  |  |  |   |        |       |        |       |  |  |  |   |
|----|--|--|--|--|--|---|--------|-------|--------|-------|--|--|--|---|
| 18 |  |  |  |  |  | R | 175.12 | 88.06 | 158.09 | 79.55 |  |  |  | 1 |
|----|--|--|--|--|--|---|--------|-------|--------|-------|--|--|--|---|

Query 21846 Hit 1

MS/MS Fragmentation of **AFSQRSSLVR**

Found in **sp|Q86TJ5|ZNF554\_HUMAN**, Zinc finger protein 554 OS=Homo sapiens GN=ZNF554 PE=2 SV=1

Match to Query 21846: 1293.677from(647.8459,2+)

Title: 254: Scan 663 (rt=24.2812, f=3, i=88) [D:\lab212\membrane\GraceJoyce\iTRAQ\_25\_2.raw]

Data File: Submitted from 20120508-1(merge) by Mascot Daemon on JOYCE-VAIO

Monoisotopic mass of neutral peptide Mr(calc): 1293.677

Variable modifications:

Ions Score: 49.67 Expect: 0.009

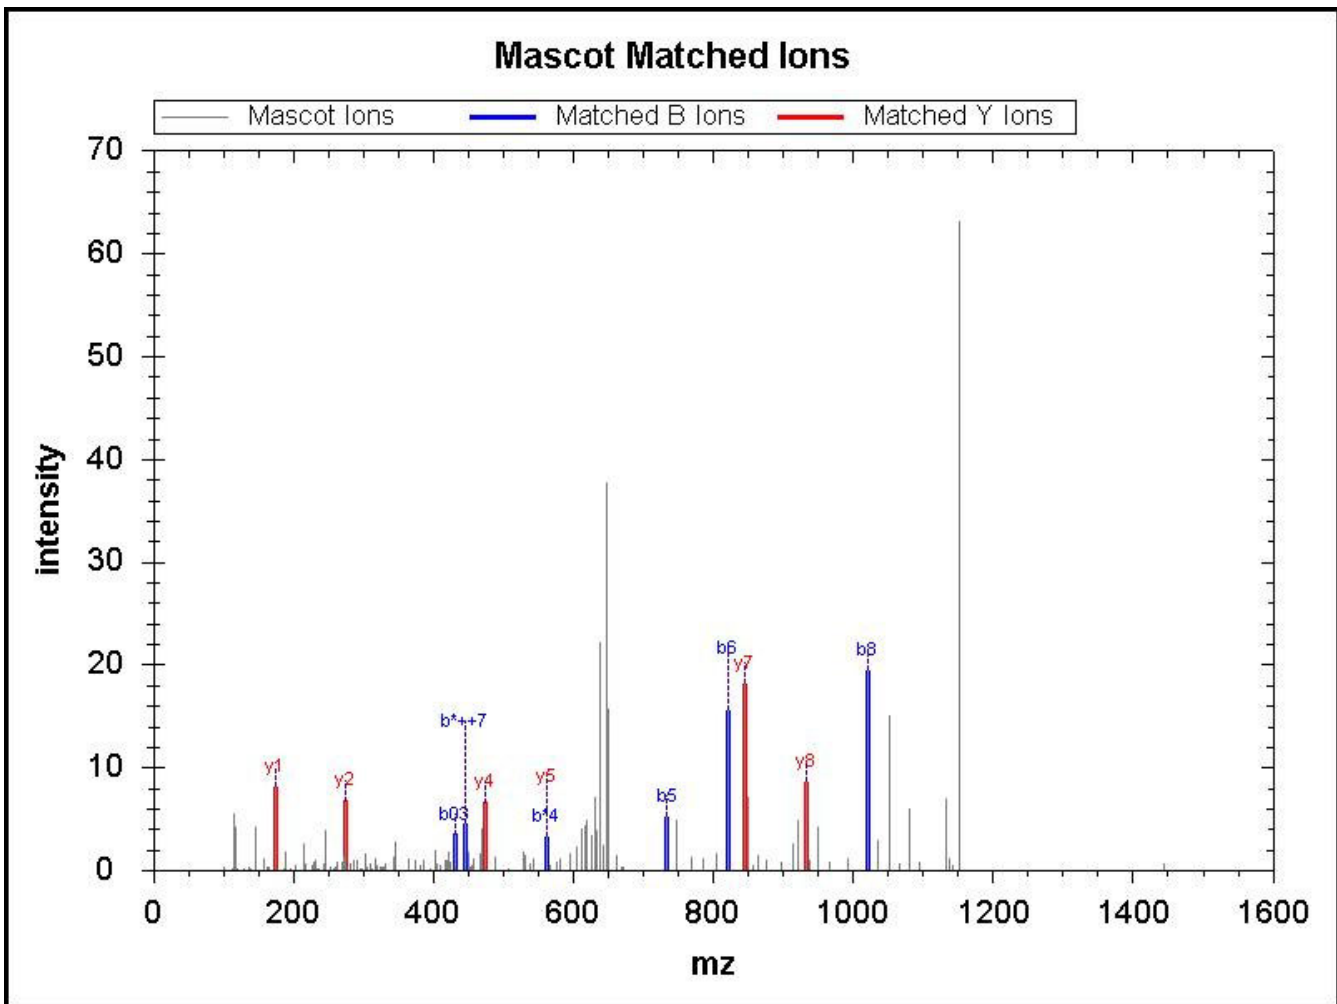

| No | b        | b++    | b*       | b*++   | b0       | b0++   | Seq | y        | y++    | y*       | y*++   | y0       | y0++   | RevNo |
|----|----------|--------|----------|--------|----------|--------|-----|----------|--------|----------|--------|----------|--------|-------|
| 1  | 216.15   | 108.58 |          |        |          |        | A   |          |        |          |        |          |        | 10    |
| 2  | 363.21   | 182.11 |          |        |          |        | F   | 1,079.60 | 540.30 | 1,062.57 | 531.79 | 1,061.59 | 531.30 | 9     |
| 3  | 450.25   | 225.63 |          |        | 432.24   | 216.62 | S   | 932.53   | 466.77 | 915.50   | 458.25 | 914.52   | 457.76 | 8     |
| 4  | 578.31   | 289.66 | 561.28   | 281.14 | 560.29   | 280.65 | Q   | 845.50   | 423.25 | 828.47   | 414.74 | 827.48   | 414.25 | 7     |
| 5  | 734.41   | 367.71 | 717.38   | 359.19 | 716.40   | 358.70 | R   | 717.44   | 359.22 | 700.41   | 350.71 | 699.43   | 350.22 | 6     |
| 6  | 821.44   | 411.22 | 804.41   | 402.71 | 803.43   | 402.22 | S   | 561.34   | 281.17 | 544.31   | 272.66 | 543.32   | 272.17 | 5     |
| 7  | 908.47   | 454.74 | 891.44   | 446.23 | 890.46   | 445.73 | S   | 474.30   | 237.66 | 457.28   | 229.14 | 456.29   | 228.65 | 4     |
| 8  | 1,021.55 | 511.28 | 1,004.53 | 502.77 | 1,003.54 | 502.28 | L   | 387.27   | 194.14 | 370.24   | 185.63 |          |        | 3     |
| 9  | 1,120.62 | 560.82 | 1,103.60 | 552.30 | 1,102.61 | 551.81 | V   | 274.19   | 137.60 | 257.16   | 129.08 |          |        | 2     |
| 10 |          |        |          |        |          |        | R   | 175.12   | 88.06  | 158.09   | 79.55  |          |        | 1     |

Query 56495 Hit 1

MS/MS Fragmentation of **DGALHVGISLAEILLK**

Found in **sp|O15397|IPO8\_HUMAN**, Importin-8 OS=Homo sapiens GN=IPO8 PE=1 SV=2

Match to Query 56495: 1936.16from(646.3941,3+)

Title: 1198: Sum of 2 scans in range 2752 (rt=70.8572, f=3, i=422) to 2753 (rt=70.8826, f=3, i=423)

[D:\lab212\membrane\Grace\Joyce\iTRAQ\_37\_1.raw]

Data File: Submitted from 20120508-1(merge) by Mascot Daemon on JOYCE-VAIO

Monoisotopic mass of neutral peptide Mr(calc): 1936.16

Variable modifications:

K16 :iTRAQ4plex (K)

Ions Score: 49.66 Expect: 0.003

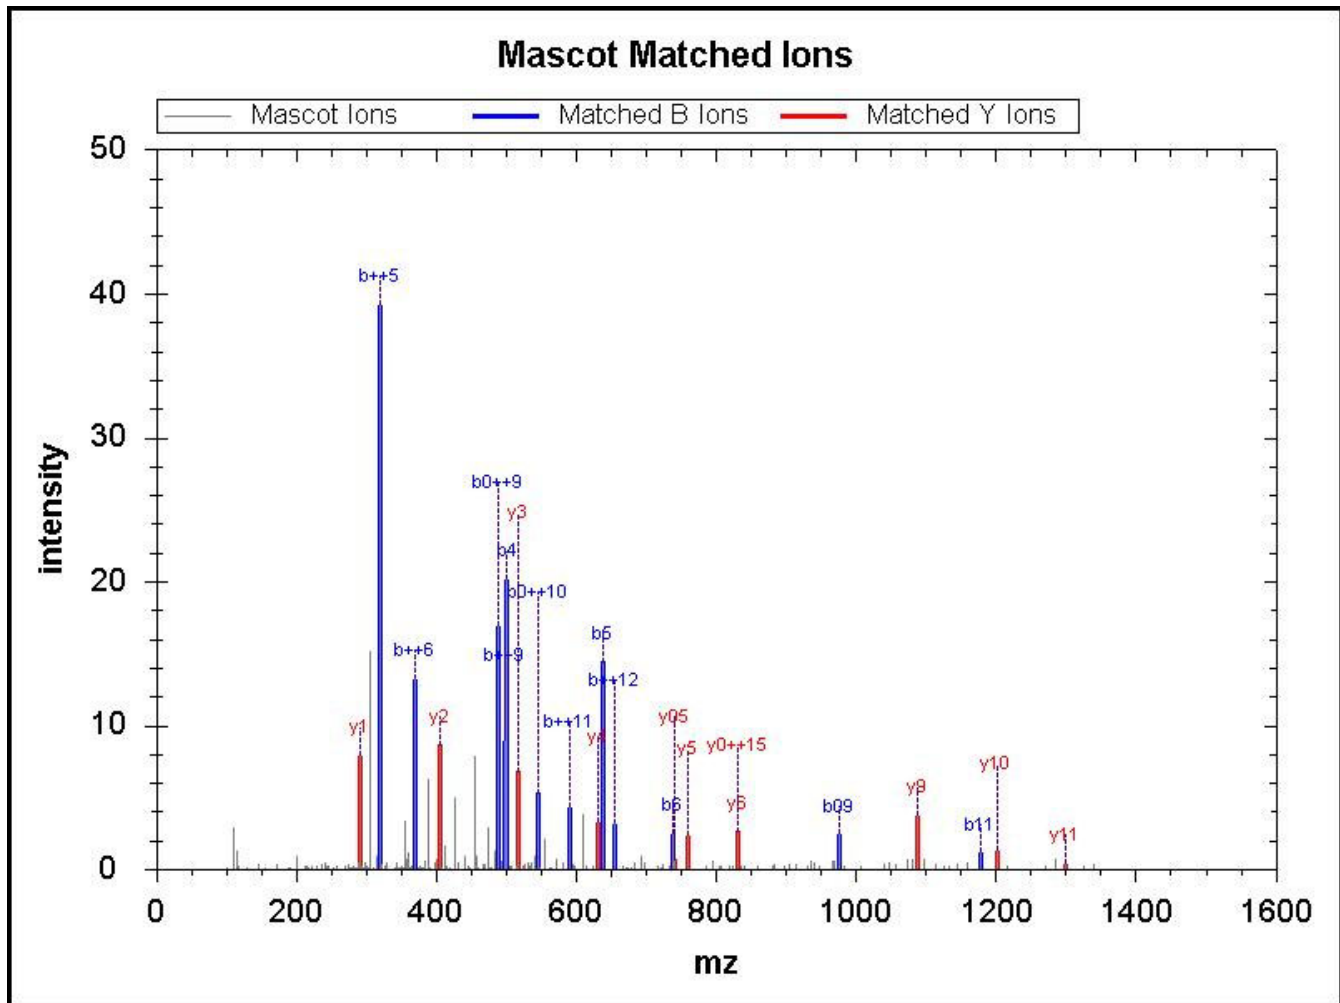

| No | b        | b++    | b0       | b0++   | Seq | y        | y++    | y*       | y*++   | y0       | y0++   | RevNo |
|----|----------|--------|----------|--------|-----|----------|--------|----------|--------|----------|--------|-------|
| 1  | 260.14   | 130.57 | 242.13   | 121.57 | D   |          |        |          |        |          |        | 16    |
| 2  | 317.16   | 159.08 | 299.15   | 150.08 | G   | 1,678.04 | 839.52 | 1,661.01 | 831.01 | 1,660.03 | 830.52 | 15    |
| 3  | 388.19   | 194.60 | 370.18   | 185.60 | A   | 1,621.02 | 811.01 | 1,603.99 | 802.50 | 1,603.01 | 802.01 | 14    |
| 4  | 501.28   | 251.14 | 483.27   | 242.14 | L   | 1,549.98 | 775.49 | 1,532.95 | 766.98 | 1,531.97 | 766.49 | 13    |
| 5  | 638.34   | 319.67 | 620.33   | 310.67 | H   | 1,436.90 | 718.95 | 1,419.87 | 710.44 | 1,418.89 | 709.95 | 12    |
| 6  | 737.41   | 369.21 | 719.40   | 360.20 | V   | 1,299.84 | 650.42 | 1,282.81 | 641.91 | 1,281.83 | 641.42 | 11    |
| 7  | 850.49   | 425.75 | 832.48   | 416.74 | I   | 1,200.77 | 600.89 | 1,183.74 | 592.37 | 1,182.76 | 591.88 | 10    |
| 8  | 907.51   | 454.26 | 889.50   | 445.25 | G   | 1,087.68 | 544.35 | 1,070.66 | 535.83 | 1,069.67 | 535.34 | 9     |
| 9  | 994.54   | 497.78 | 976.53   | 488.77 | S   | 1,030.66 | 515.84 | 1,013.64 | 507.32 | 1,012.65 | 506.83 | 8     |
| 10 | 1,107.63 | 554.32 | 1,089.62 | 545.31 | L   | 943.63   | 472.32 | 926.60   | 463.81 | 925.62   | 463.31 | 7     |
| 11 | 1,178.67 | 589.84 | 1,160.65 | 580.83 | A   | 830.55   | 415.78 | 813.52   | 407.26 | 812.54   | 406.77 | 6     |
| 12 | 1,307.71 | 654.36 | 1,289.70 | 645.35 | E   | 759.51   | 380.26 | 742.48   | 371.75 | 741.50   | 371.25 | 5     |
| 13 | 1,420.79 | 710.90 | 1,402.78 | 701.89 | I   | 630.47   | 315.74 | 613.44   | 307.22 |          |        | 4     |
| 14 | 1,533.88 | 767.44 | 1,515.87 | 758.44 | L   | 517.38   | 259.20 | 500.36   | 250.68 |          |        | 3     |
| 15 | 1,646.96 | 823.98 | 1,628.95 | 814.98 | L   | 404.30   | 202.65 | 387.27   | 194.14 |          |        | 2     |
| 16 |          |        |          |        | K   | 291.21   | 146.11 | 274.19   | 137.60 |          |        | 1     |

Query 37514 Hit 1

MS/MS Fragmentation of **ILYEGTHLDPER**

Found in **sp|Q5R115|FA36A\_HUMAN**, Protein FAM36A OS=Homo sapiens GN=FAM36A PE=1 SV=2

Match to Query 37514: 1585.82from(529.6139,3+)

Title: 432: Scan 1013 (rt=32.2635, f=2, i=152) [D:\lab212\membrane\Grace\Joyce\iTRAQ\_37\_2.raw]

Data File:Submitted from 20120508-1(merge) by Mascot Daemon on JOYCE-VAIO

Monoisotopic mass of neutral peptide Mr(calc): 1585.82

Variable modifications:

Ions Score: 49.57 Expect: 0.009

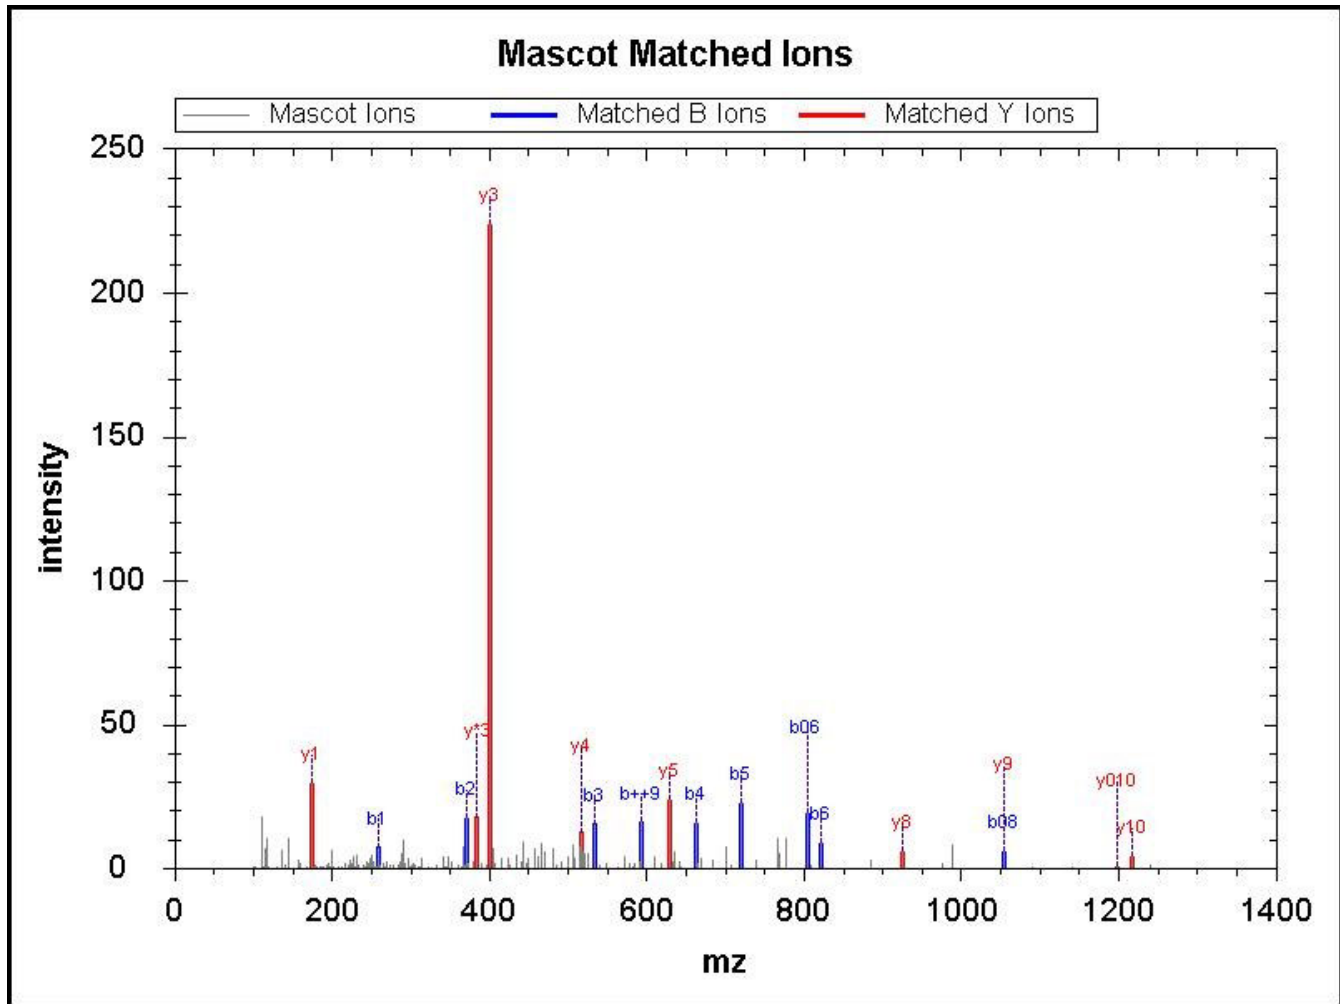

| No | b        | b++    | b0       | b0++   | Seq | y        | y++    | y*       | y*++   | y0       | y0++   | RevNo |
|----|----------|--------|----------|--------|-----|----------|--------|----------|--------|----------|--------|-------|
| 1  | 258.19   | 129.60 |          |        | I   |          |        |          |        |          |        | 12    |
| 2  | 371.28   | 186.14 |          |        | L   | 1,329.64 | 665.33 | 1,312.62 | 656.81 | 1,311.63 | 656.32 | 11    |
| 3  | 534.34   | 267.67 |          |        | Y   | 1,216.56 | 608.78 | 1,199.53 | 600.27 | 1,198.55 | 599.78 | 10    |
| 4  | 663.38   | 332.20 | 645.37   | 323.19 | E   | 1,053.50 | 527.25 | 1,036.47 | 518.74 | 1,035.49 | 518.25 | 9     |
| 5  | 720.40   | 360.71 | 702.39   | 351.70 | G   | 924.45   | 462.73 | 907.43   | 454.22 | 906.44   | 453.73 | 8     |
| 6  | 821.45   | 411.23 | 803.44   | 402.22 | T   | 867.43   | 434.22 | 850.41   | 425.71 | 849.42   | 425.21 | 7     |
| 7  | 958.51   | 479.76 | 940.50   | 470.75 | H   | 766.38   | 383.70 | 749.36   | 375.18 | 748.37   | 374.69 | 6     |
| 8  | 1,071.60 | 536.30 | 1,053.58 | 527.30 | L   | 629.33   | 315.17 | 612.30   | 306.65 | 611.31   | 306.16 | 5     |
| 9  | 1,186.62 | 593.81 | 1,168.61 | 584.81 | D   | 516.24   | 258.62 | 499.21   | 250.11 | 498.23   | 249.62 | 4     |
| 10 | 1,283.68 | 642.34 | 1,265.66 | 633.34 | P   | 401.21   | 201.11 | 384.19   | 192.60 | 383.20   | 192.11 | 3     |
| 11 | 1,412.72 | 706.86 | 1,394.71 | 697.86 | E   | 304.16   | 152.58 | 287.13   | 144.07 | 286.15   | 143.58 | 2     |
| 12 |          |        |          |        | R   | 175.12   | 88.06  | 158.09   | 79.55  |          |        | 1     |

Query 36622 Hit 1

MS/MS Fragmentation of **EIVQDGDHMIIR**

Found in **sp|P09455|RET1\_HUMAN**, Retinol-binding protein 1 OS=Homo sapiens GN=RBP1 PE=1 SV=2

Match to Query 36622: 1568.812from(523.9446,3+)

Title: 391: Scan 927 (rt=30.3291, f=3, i=139) [D:\lab212\membrane\Grace\Joyce\iTRAQ\_37\_2.raw]

Data File: Submitted from 20120508-1(merge) by Mascot Daemon on JOYCE-VAIO

Monoisotopic mass of neutral peptide Mr(calc): 1568.812

Variable modifications:

Ions Score: 49.52 Expect: 0.009

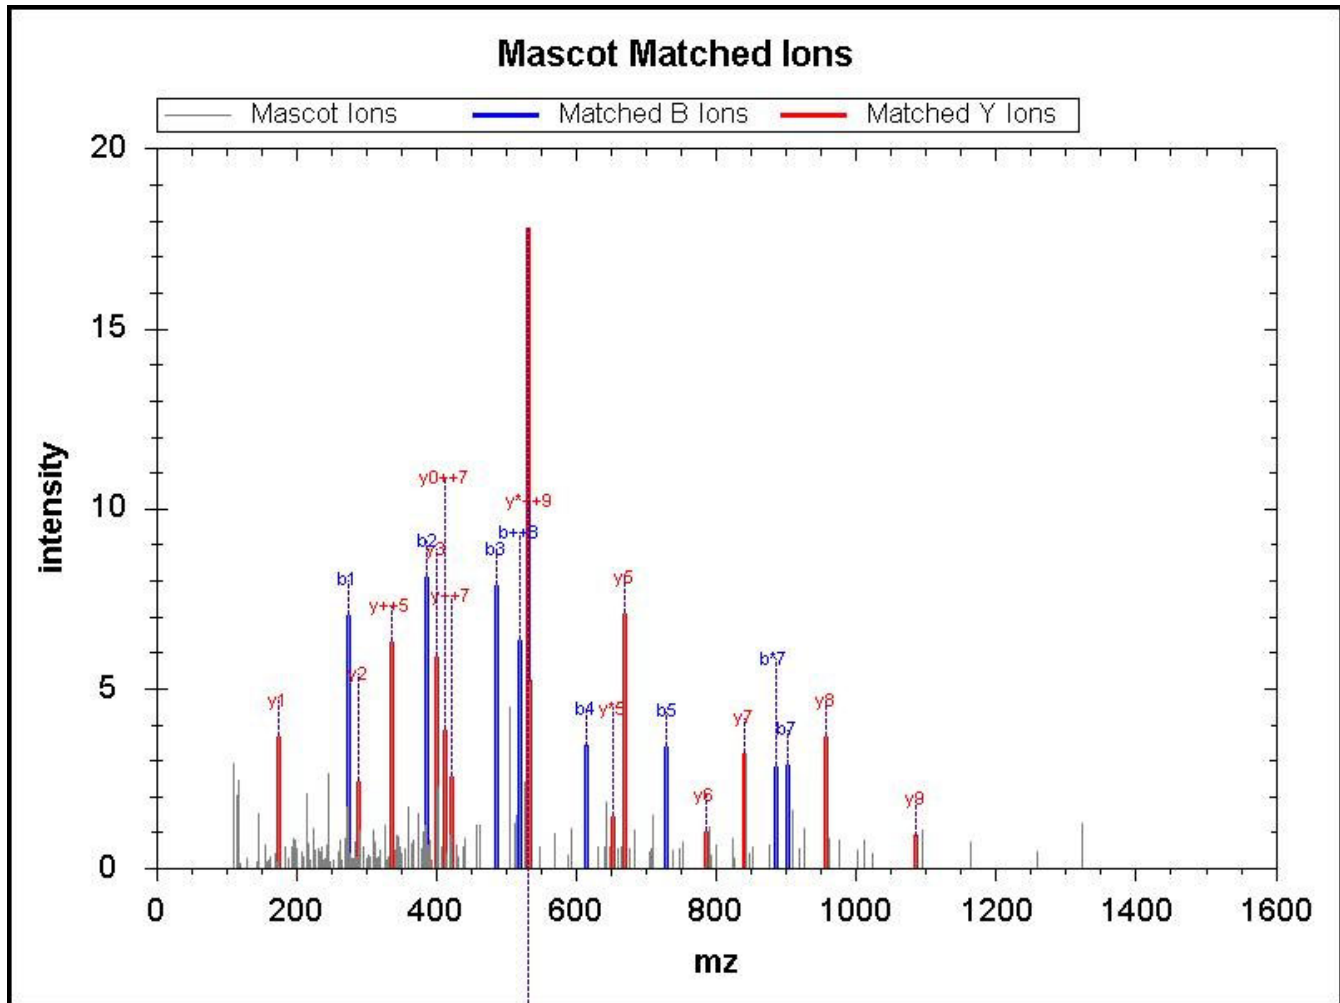



Monoisotopic mass of neutral peptide Mr(calc): 2477.38

Variable modifications:

K2 iTRAQ4plex (K)

K19 iTRAQ4plex (K)

Ions Score: 49.49 Expect: 0.006

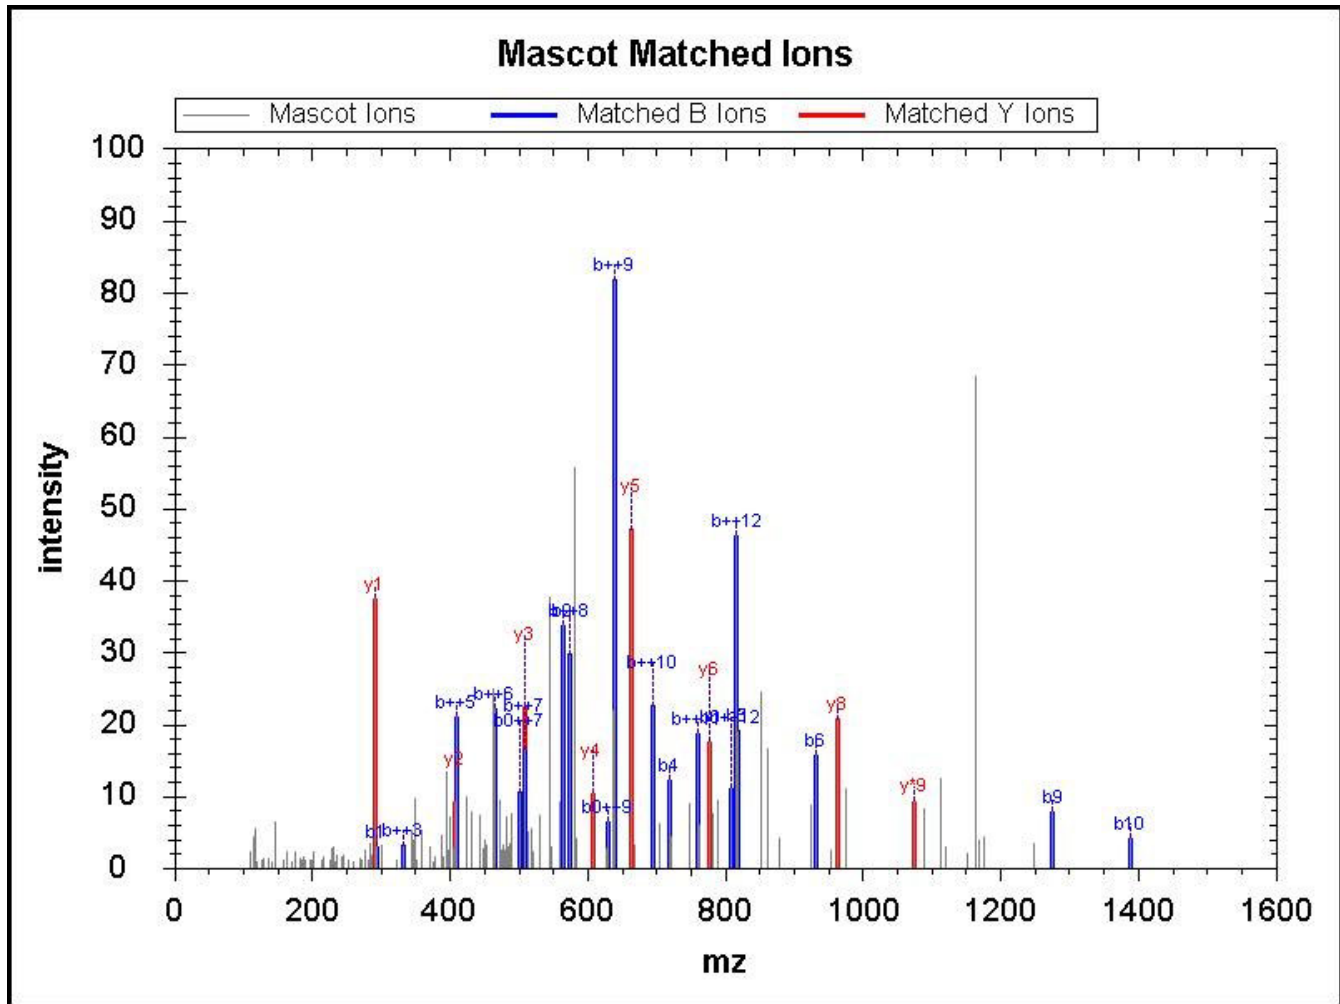

| No | b        | b++      | b*       | b***     | b0       | b0++     | Seq | y        | y++      | y*       | y***     | y0       | y0++     | RevNo |
|----|----------|----------|----------|----------|----------|----------|-----|----------|----------|----------|----------|----------|----------|-------|
| 1  | 292.18   | 146.59   |          |          |          |          | F   |          |          |          |          |          |          | 19    |
| 2  | 564.37   | 282.69   | 547.35   | 274.18   |          |          | K   | 2,187.21 | 1,094.11 | 2,170.18 | 1,085.60 | 2,169.20 | 1,085.10 | 18    |
| 3  | 661.43   | 331.22   | 644.40   | 322.70   |          |          | P   | 1,915.01 | 958.01   | 1,897.99 | 949.50   | 1,897.00 | 949.01   | 17    |
| 4  | 718.45   | 359.73   | 701.42   | 351.21   |          |          | G   | 1,817.96 | 909.48   | 1,800.93 | 900.97   | 1,799.95 | 900.48   | 16    |
| 5  | 817.52   | 409.26   | 800.49   | 400.75   |          |          | V   | 1,760.94 | 880.97   | 1,743.91 | 872.46   | 1,742.93 | 871.97   | 15    |
| 6  | 930.60   | 465.80   | 913.57   | 457.29   |          |          | I   | 1,661.87 | 831.44   | 1,644.84 | 822.93   | 1,643.86 | 822.43   | 14    |
| 7  | 1,017.63 | 509.32   | 1,000.61 | 500.81   | 999.62   | 500.32   | S   | 1,548.79 | 774.90   | 1,531.76 | 766.38   | 1,530.78 | 765.89   | 13    |
| 8  | 1,146.68 | 573.84   | 1,129.65 | 565.33   | 1,128.67 | 564.84   | E   | 1,461.76 | 731.38   | 1,444.73 | 722.87   | 1,443.74 | 722.38   | 12    |
| 9  | 1,275.72 | 638.36   | 1,258.69 | 629.85   | 1,257.71 | 629.36   | E   | 1,332.71 | 666.86   | 1,315.69 | 658.35   | 1,314.70 | 657.85   | 11    |
| 10 | 1,388.80 | 694.91   | 1,371.78 | 686.39   | 1,370.79 | 685.90   | L   | 1,203.67 | 602.34   | 1,186.64 | 593.83   | 1,185.66 | 593.33   | 10    |
| 11 | 1,516.86 | 758.93   | 1,499.83 | 750.42   | 1,498.85 | 749.93   | Q   | 1,090.59 | 545.80   | 1,073.56 | 537.28   | 1,072.58 | 536.79   | 9     |
| 12 | 1,631.89 | 816.45   | 1,614.86 | 807.93   | 1,613.88 | 807.44   | D   | 962.53   | 481.77   | 945.50   | 473.25   | 944.52   | 472.76   | 8     |
| 13 | 1,702.93 | 851.97   | 1,685.90 | 843.45   | 1,684.91 | 842.96   | A   | 847.50   | 424.25   | 830.47   | 415.74   | 829.49   | 415.25   | 7     |
| 14 | 1,816.01 | 908.51   | 1,798.98 | 900.00   | 1,798.00 | 899.50   | L   | 776.46   | 388.74   | 759.44   | 380.22   | 758.45   | 379.73   | 6     |
| 15 | 1,873.03 | 937.02   | 1,856.00 | 928.51   | 1,855.02 | 928.01   | G   | 663.38   | 332.19   | 646.35   | 323.68   | 645.37   | 323.19   | 5     |
| 16 | 1,972.10 | 986.55   | 1,955.07 | 978.04   | 1,954.09 | 977.55   | V   | 606.36   | 303.68   | 589.33   | 295.17   | 588.35   | 294.68   | 4     |
| 17 | 2,073.15 | 1,037.08 | 2,056.12 | 1,028.56 | 2,055.14 | 1,028.07 | T   | 507.29   | 254.15   | 490.26   | 245.64   | 489.28   | 245.14   | 3     |
| 18 | 2,188.17 | 1,094.59 | 2,171.15 | 1,086.08 | 2,170.16 | 1,085.59 | D   | 406.24   | 203.62   | 389.22   | 195.11   | 388.23   | 194.62   | 2     |
| 19 |          |          |          |          |          |          | K   | 291.21   | 146.11   | 274.19   | 137.60   |          |          | 1     |

Query 31228 Hit 1

MS/MS Fragmentation of **ELQHAALGGTATR**

Found in [sp|O14828|SCAM3\\_HUMAN](#), Secretory carrier-associated membrane protein 3 OS=Homo sapiens GN=SCAMP3 PE=1 SV=3

Match to Query 31228: 1467.788from(490.27,3+)

Title: 160: Scan 464 (rt=19.7768, f=2, i=67) [D:\lab212\membrane\Grace\Joyce\iTRAQ\_38\_1.raw]

Data File: Submitted from 20120508-1(merge) by Mascot Daemon on JOYCE-VAIO

Monoisotopic mass of neutral peptide Mr(calc): 1467.788

Variable modifications:

Ions Score: 49.48 Expect: 0.009

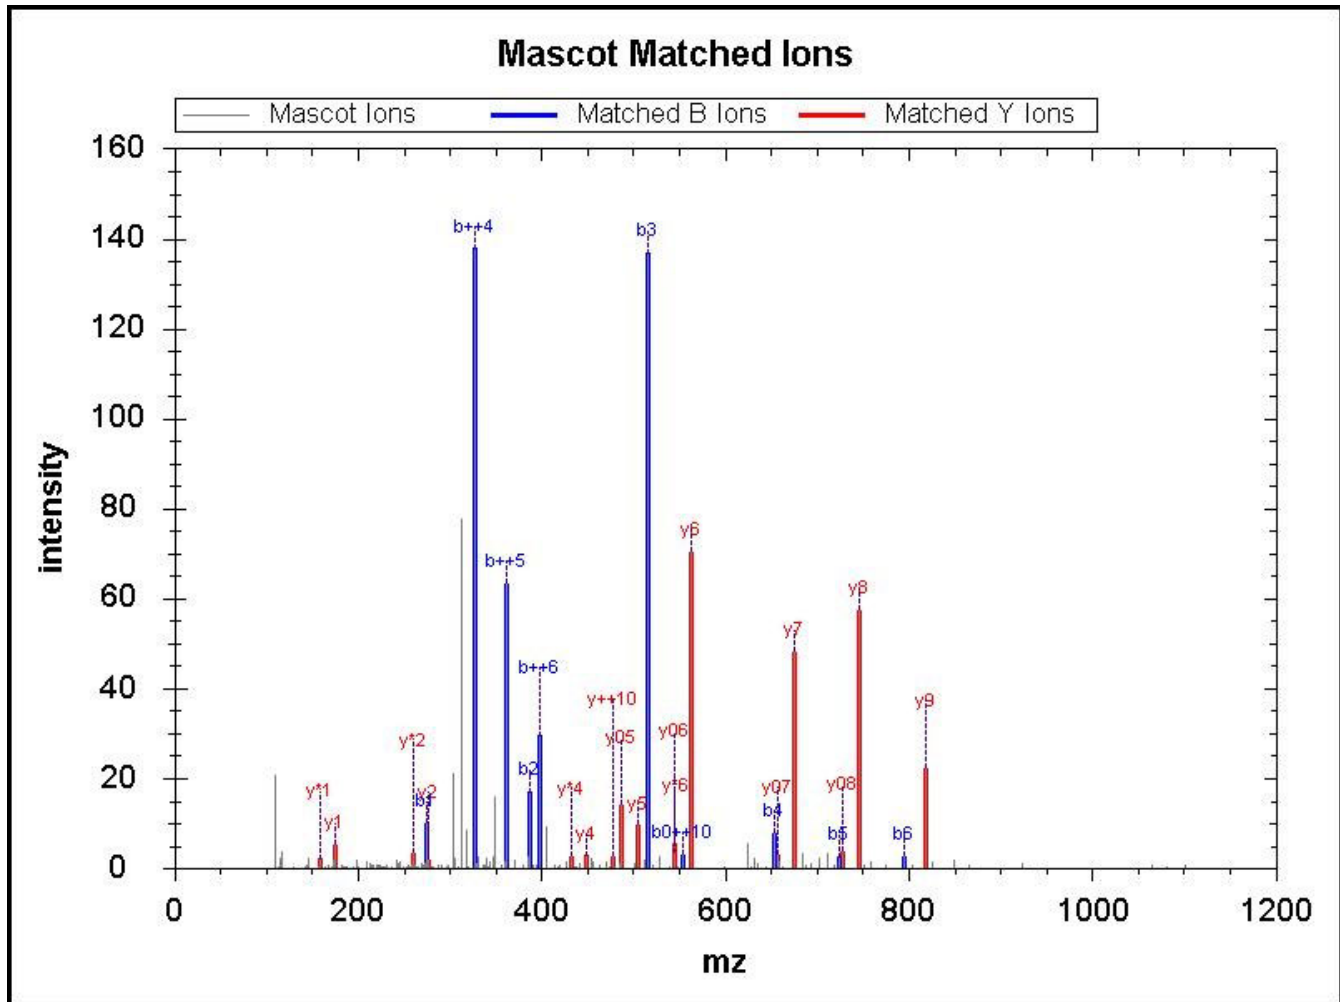

| No | b        | b++    | b*       | b*++   | b0       | b0++   | Seq | y        | y++    | y*       | y*++   | y0       | y0++   | RevNo |
|----|----------|--------|----------|--------|----------|--------|-----|----------|--------|----------|--------|----------|--------|-------|
| 1  | 274.15   | 137.58 |          |        | 256.14   | 128.57 | E   |          |        |          |        |          |        | 13    |
| 2  | 387.24   | 194.12 |          |        | 369.23   | 185.12 | L   | 1,195.65 | 598.33 | 1,178.63 | 589.82 | 1,177.64 | 589.33 | 12    |
| 3  | 515.29   | 258.15 | 498.27   | 249.64 | 497.28   | 249.15 | Q   | 1,082.57 | 541.79 | 1,065.54 | 533.28 | 1,064.56 | 532.78 | 11    |
| 4  | 652.35   | 326.68 | 635.33   | 318.17 | 634.34   | 317.68 | H   | 954.51   | 477.76 | 937.48   | 469.25 | 936.50   | 468.75 | 10    |
| 5  | 723.39   | 362.20 | 706.36   | 353.69 | 705.38   | 353.19 | A   | 817.45   | 409.23 | 800.43   | 400.72 | 799.44   | 400.22 | 9     |
| 6  | 794.43   | 397.72 | 777.40   | 389.20 | 776.42   | 388.71 | A   | 746.42   | 373.71 | 729.39   | 365.20 | 728.40   | 364.71 | 8     |
| 7  | 907.51   | 454.26 | 890.49   | 445.75 | 889.50   | 445.25 | L   | 675.38   | 338.19 | 658.35   | 329.68 | 657.37   | 329.19 | 7     |
| 8  | 964.53   | 482.77 | 947.51   | 474.26 | 946.52   | 473.76 | G   | 562.29   | 281.65 | 545.27   | 273.14 | 544.28   | 272.65 | 6     |
| 9  | 1,021.55 | 511.28 | 1,004.53 | 502.77 | 1,003.54 | 502.28 | G   | 505.27   | 253.14 | 488.25   | 244.63 | 487.26   | 244.13 | 5     |
| 10 | 1,122.60 | 561.80 | 1,105.58 | 553.29 | 1,104.59 | 552.80 | T   | 448.25   | 224.63 | 431.22   | 216.12 | 430.24   | 215.62 | 4     |
| 11 | 1,193.64 | 597.32 | 1,176.61 | 588.81 | 1,175.63 | 588.32 | A   | 347.20   | 174.11 | 330.18   | 165.59 | 329.19   | 165.10 | 3     |
| 12 | 1,294.69 | 647.85 | 1,277.66 | 639.33 | 1,276.68 | 638.84 | T   | 276.17   | 138.59 | 259.14   | 130.07 | 258.16   | 129.58 | 2     |
| 13 |          |        |          |        |          |        | R   | 175.12   | 88.06  | 158.09   | 79.55  |          |        | 1     |

Query 31118 Hit 1

MS/MS Fragmentation of **TTL**LAGDIEHPR

Found in **sp|Q07954|LRP1\_HUMAN**, Prolow-density lipoprotein receptor-related protein 1 OS=Homo sapiens GN=LRP1 PE=1 SV=2

Match to Query 31118: 1465.801 from (489.6076,3+)

Title: 385: Scan 916 (rt=30.0637, f=2, i=137) [D:\lab212\membrane\Grace\Joyce\iTRAQ\_37\_1.raw]

Data File: Submitted from 20120508-1(merge) by Mascot Daemon on JOYCE-VAIO

Monoisotopic mass of neutral peptide Mr(calc): 1465.801

Variable modifications:

Ions Score: 49.47 Expect: 0.009

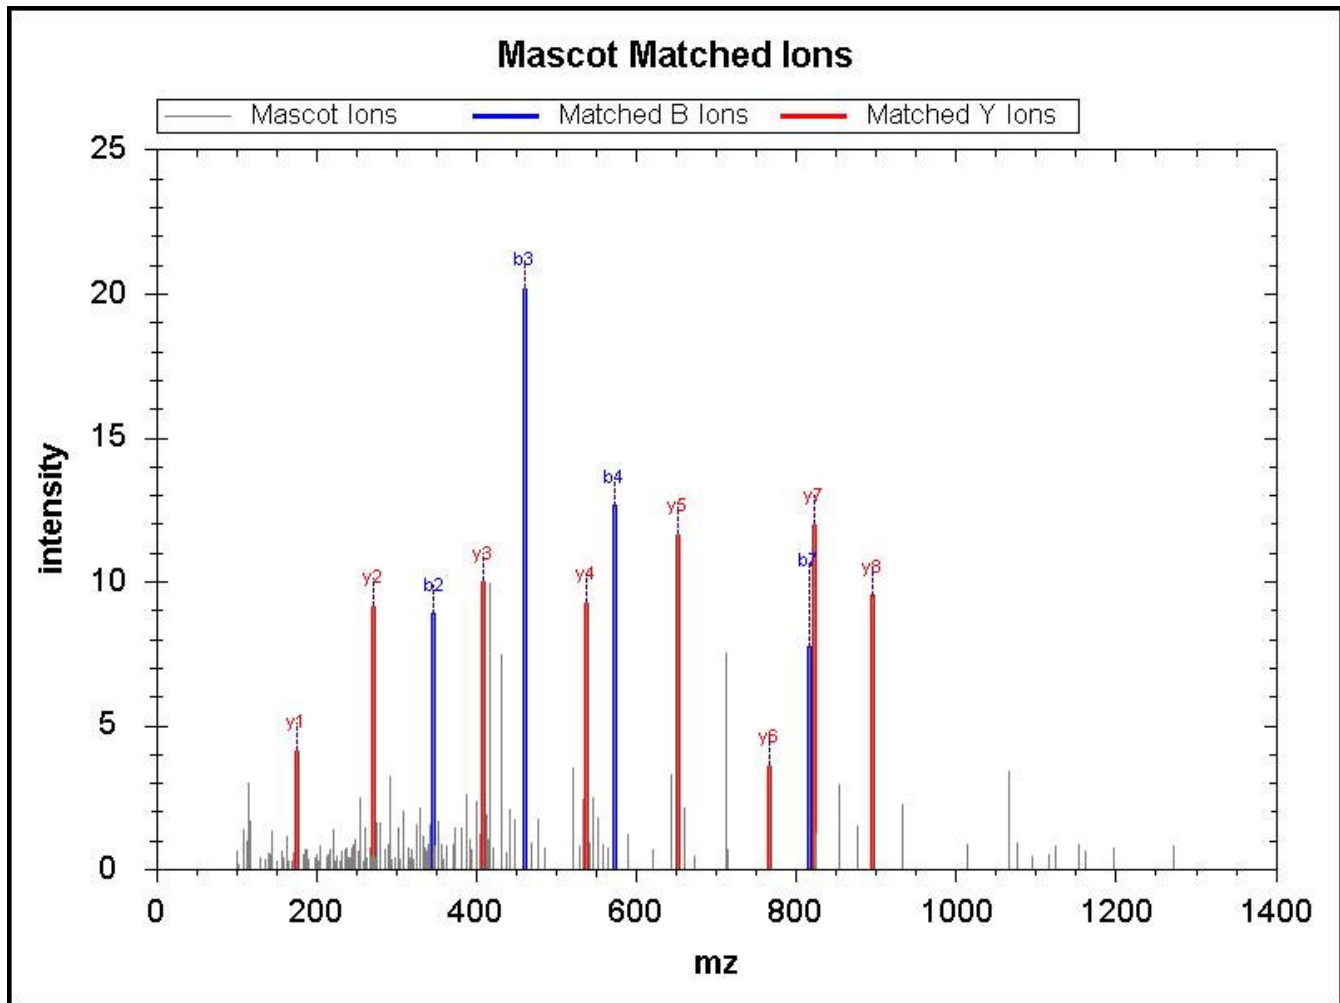

| No | b        | b++    | b0       | b0++   | Seq | y        | y++    | y*       | y*++   | y0       | y0++   | RevNo |
|----|----------|--------|----------|--------|-----|----------|--------|----------|--------|----------|--------|-------|
| 1  | 246.16   | 123.58 | 228.15   | 114.58 | T   |          |        |          |        |          |        | 12    |
| 2  | 347.20   | 174.11 | 329.19   | 165.10 | T   | 1,221.66 | 611.33 | 1,204.63 | 602.82 | 1,203.65 | 602.33 | 11    |
| 3  | 460.29   | 230.65 | 442.28   | 221.64 | L   | 1,120.61 | 560.81 | 1,103.58 | 552.30 | 1,102.60 | 551.80 | 10    |
| 4  | 573.37   | 287.19 | 555.36   | 278.18 | L   | 1,007.53 | 504.27 | 990.50   | 495.75 | 989.52   | 495.26 | 9     |
| 5  | 644.41   | 322.71 | 626.40   | 313.70 | A   | 894.44   | 447.73 | 877.42   | 439.21 | 876.43   | 438.72 | 8     |
| 6  | 701.43   | 351.22 | 683.42   | 342.21 | G   | 823.41   | 412.21 | 806.38   | 403.69 | 805.40   | 403.20 | 7     |
| 7  | 816.46   | 408.73 | 798.45   | 399.73 | D   | 766.38   | 383.70 | 749.36   | 375.18 | 748.37   | 374.69 | 6     |
| 8  | 929.54   | 465.27 | 911.53   | 456.27 | I   | 651.36   | 326.18 | 634.33   | 317.67 | 633.35   | 317.18 | 5     |
| 9  | 1,058.58 | 529.80 | 1,040.57 | 520.79 | E   | 538.27   | 269.64 | 521.25   | 261.13 | 520.26   | 260.63 | 4     |
| 10 | 1,195.64 | 598.33 | 1,177.63 | 589.32 | H   | 409.23   | 205.12 | 392.20   | 196.61 |          |        | 3     |
| 11 | 1,292.70 | 646.85 | 1,274.69 | 637.85 | P   | 272.17   | 136.59 | 255.15   | 128.08 |          |        | 2     |
| 12 |          |        |          |        | R   | 175.12   | 88.06  | 158.09   | 79.55  |          |        | 1     |

Query 56871 Hit 1

MS/MS Fragmentation of **HMD**FLSDFEMMLQR

Found in **sp|Q96ST2|IWS1\_HUMAN**, Protein IWS1 homolog OS=Homo sapiens GN=IWS1 PE=1 SV=2

Match to Query 56871: 1942.889 from (648.6369,3+)

Title: 1116: Sum of 2 scans in range 2511 (rt=65.6578, f=2, i=413) to 2512 (rt=65.6832, f=2, i=414)  
 [D:\lab212\membrane\GraceJoyce\iTRAQ\_38\_2.raw]  
 Data File: Submitted from 20120508-1(merge) by Mascot Daemon on JOYCE-VAIO  
 Monoisotopic mass of neutral peptide Mr(calc): 1942.889  
 Variable modifications:  
 Ions Score: 49.39 Expect: 0.007

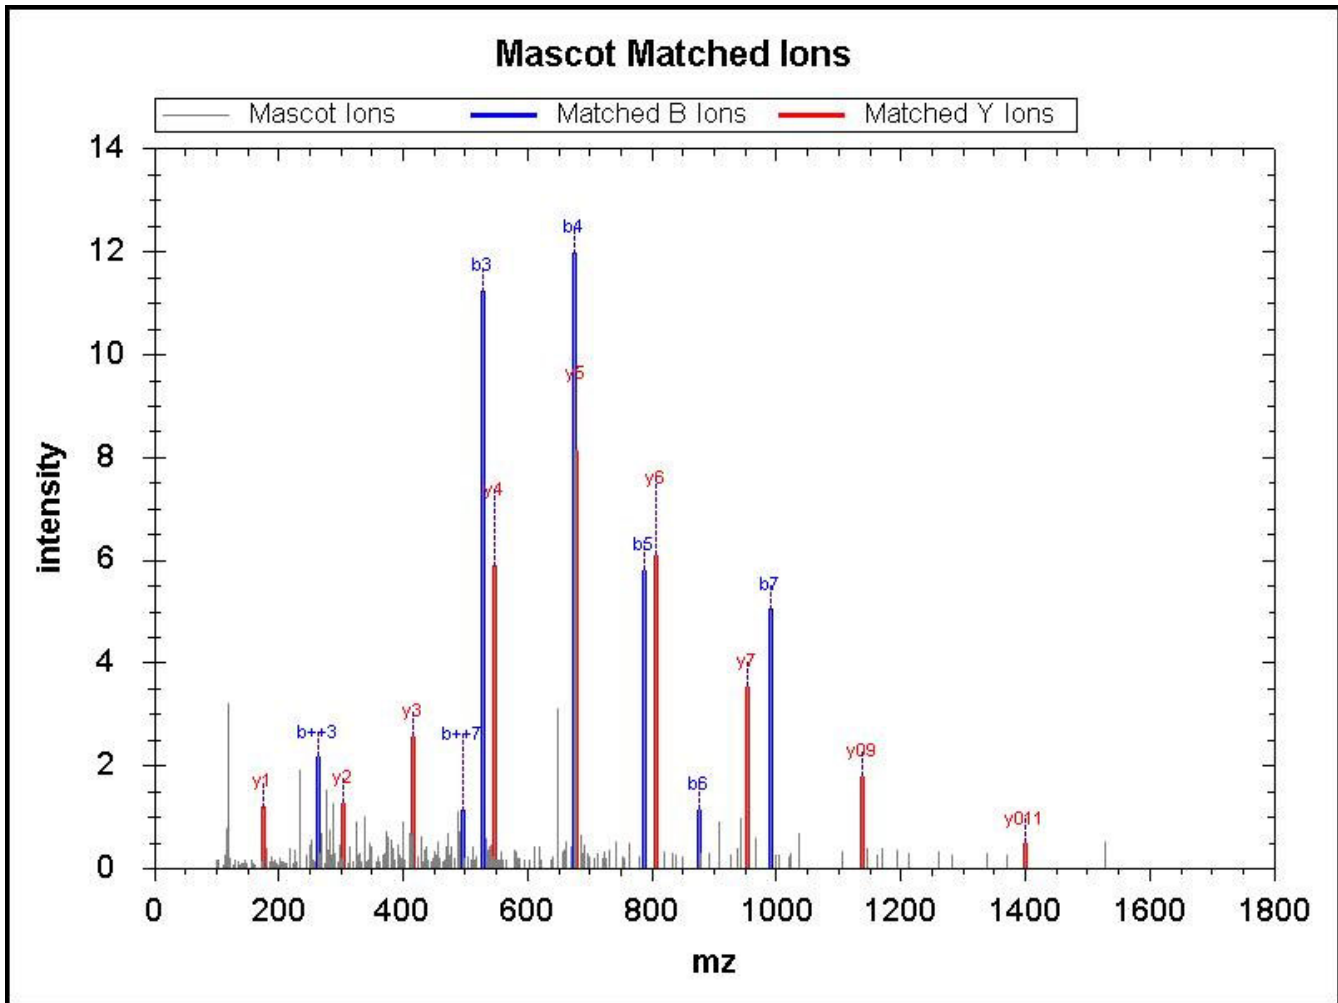

| No | b        | b++    | b*       | b*++   | b0       | b0++   | Seq | y        | y++    | y*       | y*++   | y0       | y0++   | RevNo |
|----|----------|--------|----------|--------|----------|--------|-----|----------|--------|----------|--------|----------|--------|-------|
| 1  | 282.17   | 141.59 |          |        |          |        | H   |          |        |          |        |          |        | 14    |
| 2  | 413.21   | 207.11 |          |        |          |        | M   | 1,662.73 | 831.87 | 1,645.71 | 823.36 | 1,644.72 | 822.86 | 13    |
| 3  | 528.24   | 264.62 |          |        | 510.23   | 255.62 | D   | 1,531.69 | 766.35 | 1,514.67 | 757.84 | 1,513.68 | 757.34 | 12    |
| 4  | 675.30   | 338.16 |          |        | 657.29   | 329.15 | F   | 1,416.67 | 708.84 | 1,399.64 | 700.32 | 1,398.65 | 699.83 | 11    |
| 5  | 788.39   | 394.70 |          |        | 770.38   | 385.69 | L   | 1,269.60 | 635.30 | 1,252.57 | 626.79 | 1,251.59 | 626.30 | 10    |
| 6  | 875.42   | 438.21 |          |        | 857.41   | 429.21 | S   | 1,156.51 | 578.76 | 1,139.49 | 570.25 | 1,138.50 | 569.75 | 9     |
| 7  | 990.45   | 495.73 |          |        | 972.44   | 486.72 | D   | 1,069.48 | 535.24 | 1,052.45 | 526.73 | 1,051.47 | 526.24 | 8     |
| 8  | 1,137.52 | 569.26 |          |        | 1,119.51 | 560.26 | F   | 954.45   | 477.73 | 937.43   | 469.22 | 936.44   | 468.73 | 7     |
| 9  | 1,266.56 | 633.78 |          |        | 1,248.55 | 624.78 | E   | 807.39   | 404.20 | 790.36   | 395.68 | 789.37   | 395.19 | 6     |
| 10 | 1,397.60 | 699.30 |          |        | 1,379.59 | 690.30 | M   | 678.34   | 339.67 | 661.32   | 331.16 |          |        | 5     |
| 11 | 1,528.64 | 764.82 |          |        | 1,510.63 | 755.82 | M   | 547.30   | 274.15 | 530.28   | 265.64 |          |        | 4     |
| 12 | 1,641.72 | 821.37 |          |        | 1,623.71 | 812.36 | L   | 416.26   | 208.63 | 399.24   | 200.12 |          |        | 3     |
| 13 | 1,769.78 | 885.39 | 1,752.76 | 876.88 | 1,751.77 | 876.39 | Q   | 303.18   | 152.09 | 286.15   | 143.58 |          |        | 2     |
| 14 |          |        |          |        |          |        | R   | 175.12   | 88.06  | 158.09   | 79.55  |          |        | 1     |

Query 13496 Hit 1

MS/MS Fragmentation of **AAEEVEAK**

Found in **sp|Q9NX63|CHCH3\_HUMAN**, Coiled-coil-helix-coiled-coil-helix domain-containing protein 3

Match to Query 13496: 1133.619 from (567.8168, 2+)

Title: 64: Sum of 2 scans in range 254 (rt=15.0732, f=4, i=37) to 255 (rt=15.0986, f=4, i=38)  
 [D:\lab212\membrane\Grace\Joyce\iTRAQ\_31\_2.raw]  
 Data File: Submitted from 20120508-1(merge) by Mascot Daemon on JOYCE-VAIO  
 Monoisotopic mass of neutral peptide Mr(calc): 1133.619  
 Variable modifications:  
 K8 iTRAQ4plex (K)  
 Ions Score: 49.24 Expect: 0.011

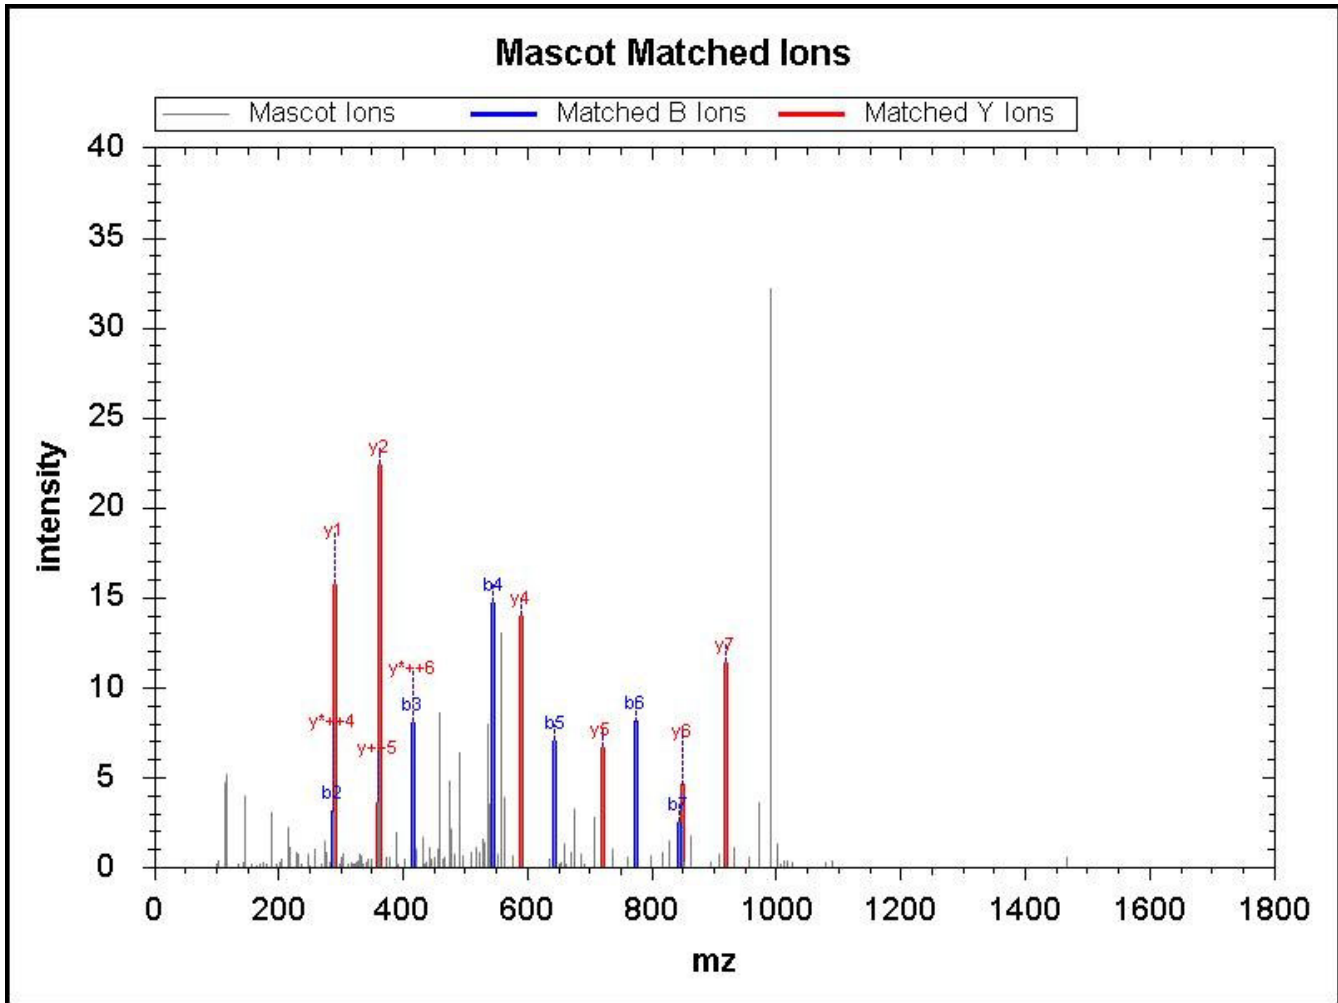

| No | b      | b++    | b0     | b0++   | Seq | y      | y++    | y*     | y*++   | y0     | y0++   | RevNo |
|----|--------|--------|--------|--------|-----|--------|--------|--------|--------|--------|--------|-------|
| 1  | 216.15 | 108.58 |        |        | A   |        |        |        |        |        |        | 8     |
| 2  | 287.18 | 144.10 |        |        | A   | 919.49 | 460.25 | 902.46 | 451.73 | 901.47 | 451.24 | 7     |
| 3  | 416.23 | 208.62 | 398.22 | 199.61 | E   | 848.45 | 424.73 | 831.42 | 416.21 | 830.44 | 415.72 | 6     |
| 4  | 545.27 | 273.14 | 527.26 | 264.13 | E   | 719.41 | 360.21 | 702.38 | 351.69 | 701.40 | 351.20 | 5     |
| 5  | 644.34 | 322.67 | 626.33 | 313.67 | V   | 590.36 | 295.69 | 573.34 | 287.17 | 572.35 | 286.68 | 4     |
| 6  | 773.38 | 387.19 | 755.37 | 378.19 | E   | 491.29 | 246.15 | 474.27 | 237.64 | 473.28 | 237.15 | 3     |
| 7  | 844.42 | 422.71 | 826.41 | 413.71 | A   | 362.25 | 181.63 | 345.23 | 173.12 |        |        | 2     |
| 8  |        |        |        |        | K   | 291.21 | 146.11 | 274.19 | 137.60 |        |        | 1     |

Query 61002 Hit 1

MS/MS Fragmentation of **LHLLDQVFFQELLK**

Found in **sp|Q7Z6J4|FGD2\_HUMAN**, FYVE

Match to Query 61002: 2030.178 from (677.7333, 3+)

Title: 1159: Scan 2539 (rt=66.7029, f=2, i=415) [D:\lab212\membrane\Grace\Joyce\iTRAQ\_39\_1.raw]

Data File: Submitted from 20120508-1(merge) by Mascot Daemon on JOYCE-VAIO

Monoisotopic mass of neutral peptide Mr(calc): 2030.178

Variable modifications:

K14 iTRAQ4plex (K)

Ions Score: 49.1 Expect: 0.005



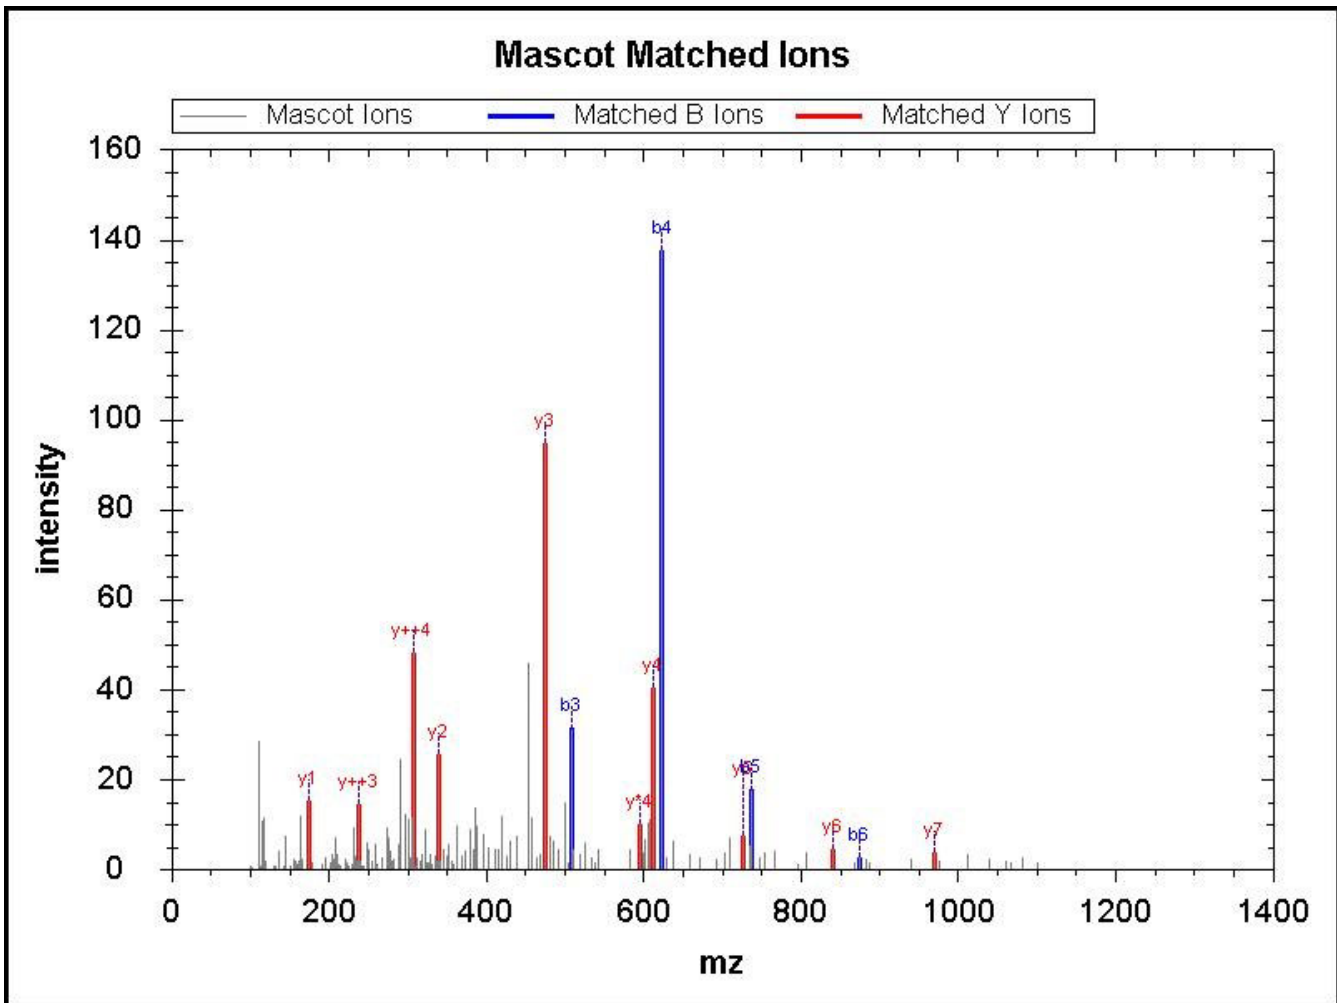

| No | b        | b++    | b0       | b0++   | Seq | y        | y++    | y*       | y*++   | y0       | y0++   | RevNo |
|----|----------|--------|----------|--------|-----|----------|--------|----------|--------|----------|--------|-------|
| 1  | 232.14   | 116.57 | 214.13   | 107.57 | S   |          |        |          |        |          |        | 9     |
| 2  | 379.21   | 190.11 | 361.20   | 181.10 | F   | 1,116.52 | 558.76 | 1,099.50 | 550.25 | 1,098.51 | 549.76 | 8     |
| 3  | 508.25   | 254.63 | 490.24   | 245.62 | E   | 969.45   | 485.23 | 952.43   | 476.72 | 951.44   | 476.23 | 7     |
| 4  | 623.28   | 312.14 | 605.27   | 303.14 | D   | 840.41   | 420.71 | 823.38   | 412.20 | 822.40   | 411.70 | 6     |
| 5  | 736.36   | 368.69 | 718.35   | 359.68 | I   | 725.38   | 363.20 | 708.36   | 354.68 |          |        | 5     |
| 6  | 873.42   | 437.21 | 855.41   | 428.21 | H   | 612.30   | 306.65 | 595.27   | 298.14 |          |        | 4     |
| 7  | 1,010.48 | 505.74 | 992.47   | 496.74 | H   | 475.24   | 238.12 | 458.21   | 229.61 |          |        | 3     |
| 8  | 1,173.54 | 587.28 | 1,155.53 | 578.27 | Y   | 338.18   | 169.59 | 321.16   | 161.08 |          |        | 2     |
| 9  |          |        |          |        | R   | 175.12   | 88.06  | 158.09   | 79.55  |          |        | 1     |

Query 22205 Hit 1

MS/MS Fragmentation of **TIQAHEGFVR**

Found in **sp|Q9NV06|DCA13\_HUMAN**, DDB1- and CUL4-associated factor 13 OS=Homo sapiens GN=DCAF13 PE=1 SV=2

Match to Query 22205: 1300.62from(434.5472,3+)

Title: 247: Sum of 2 scans in range 574 (rt=22.679, f=4, i=165) to 575 (rt=22.7044, f=4, i=166)

[D:\lab212\membrane\GraceJoyce\iTRAQ40.raw]

Data File: Submitted from 20120508-1(merge) by Mascot Daemon on JOYCE-VAIO

Monoisotopic mass of neutral peptide Mr(calc): 1300.62

Variable modifications:

Ions Score: 48.85 Expect: 0.007

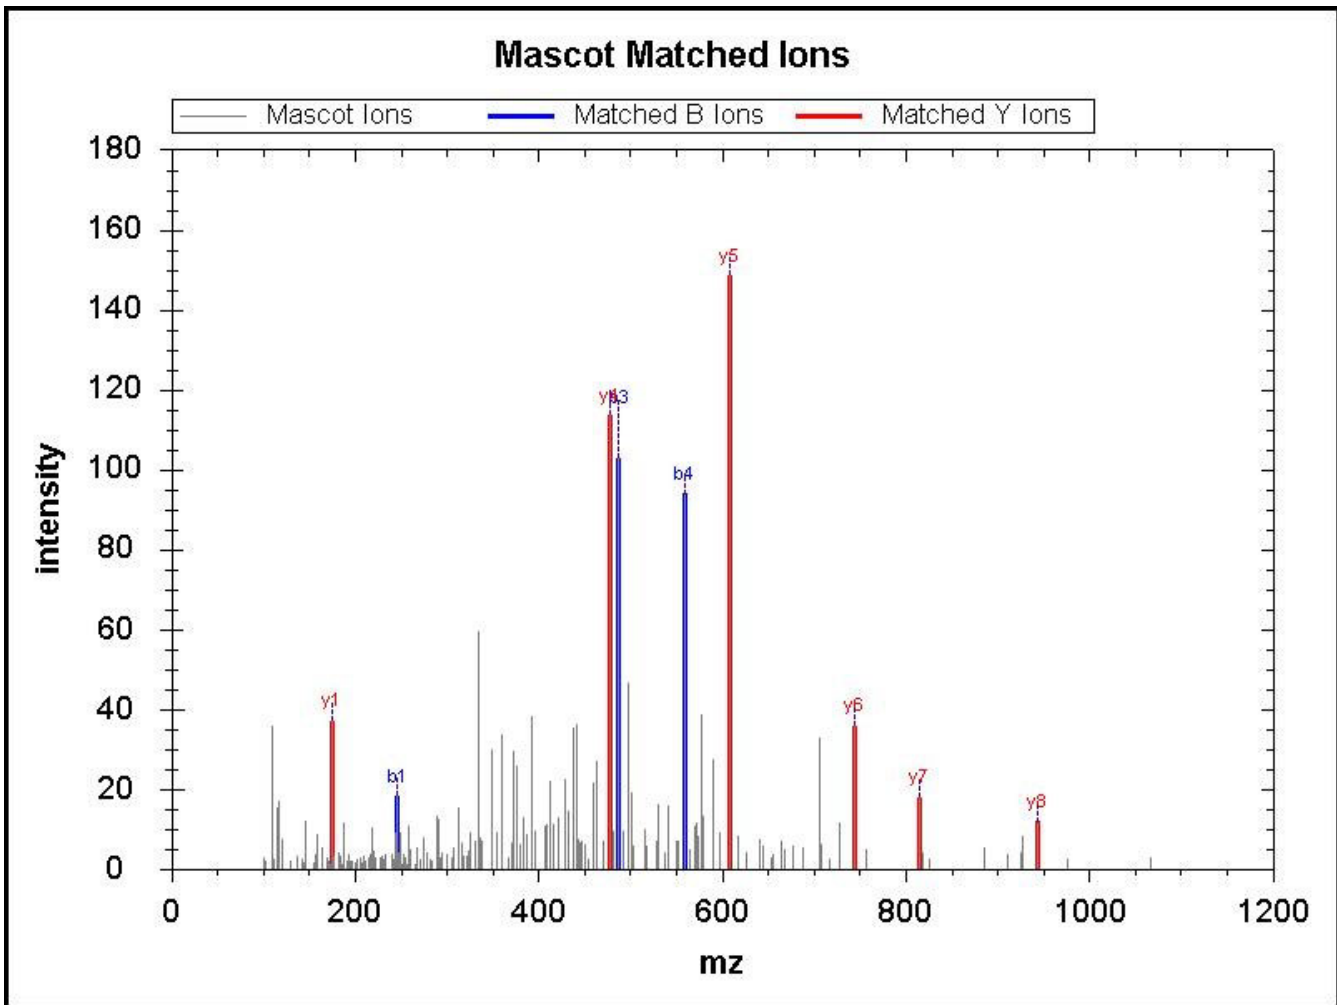

| No | b        | b++    | b*       | b*++   | b0       | b0++   | Seq | y        | y++    | y*       | y*++   | y0       | y0++   | RevNo |
|----|----------|--------|----------|--------|----------|--------|-----|----------|--------|----------|--------|----------|--------|-------|
| 1  | 246.16   | 123.58 |          |        | 228.15   | 114.58 | T   |          |        |          |        |          |        | 10    |
| 2  | 359.24   | 180.12 |          |        | 341.23   | 171.12 | I   | 1,056.56 | 528.78 | 1,039.53 | 520.27 | 1,038.55 | 519.78 | 9     |
| 3  | 487.30   | 244.15 | 470.27   | 235.64 | 469.29   | 235.15 | Q   | 943.47   | 472.24 | 926.45   | 463.73 | 925.46   | 463.24 | 8     |
| 4  | 558.34   | 279.67 | 541.31   | 271.16 | 540.33   | 270.67 | A   | 815.42   | 408.21 | 798.39   | 399.70 | 797.41   | 399.21 | 7     |
| 5  | 695.40   | 348.20 | 678.37   | 339.69 | 677.39   | 339.20 | H   | 744.38   | 372.69 | 727.35   | 364.18 | 726.37   | 363.69 | 6     |
| 6  | 824.44   | 412.72 | 807.41   | 404.21 | 806.43   | 403.72 | E   | 607.32   | 304.16 | 590.29   | 295.65 | 589.31   | 295.16 | 5     |
| 7  | 881.46   | 441.23 | 864.43   | 432.72 | 863.45   | 432.23 | G   | 478.28   | 239.64 | 461.25   | 231.13 |          |        | 4     |
| 8  | 1,028.53 | 514.77 | 1,011.50 | 506.25 | 1,010.52 | 505.76 | F   | 421.26   | 211.13 | 404.23   | 202.62 |          |        | 3     |
| 9  | 1,127.60 | 564.30 | 1,110.57 | 555.79 | 1,109.59 | 555.30 | V   | 274.19   | 137.60 | 257.16   | 129.08 |          |        | 2     |
| 10 |          |        |          |        |          |        | R   | 175.12   | 88.06  | 158.09   | 79.55  |          |        | 1     |

Query 64839 Hit 1

MS/MS Fragmentation of **EKDGEFSVLQLVGMLR**

Found in **sp|P29317|EPHA2\_HUMAN**, Ephrin type-A receptor 2 OS=Homo sapiens GN=EPHA2 PE=1 SV=2

Match to Query 64839: 2108.155from(703.7255,3+)

Title: 1133: Sum of 2 scans in range 2436 (rt=64.5664, f=4, i=757) to 2437 (rt=64.5918, f=4, i=758)

[D:\lab212\membrane\GraceJoyce\iTRAQ\_40\_1.raw]

Data File: Submitted from 20120508-1(merge) by Mascot Daemon on JOYCE-VAIO

Monoisotopic mass of neutral peptide Mr(calc): 2108.155

Variable modifications:

K2 iTRAQ4plex (K)

Ions Score: 48.79 Expect: 0.010



### Mascot Matched Ions

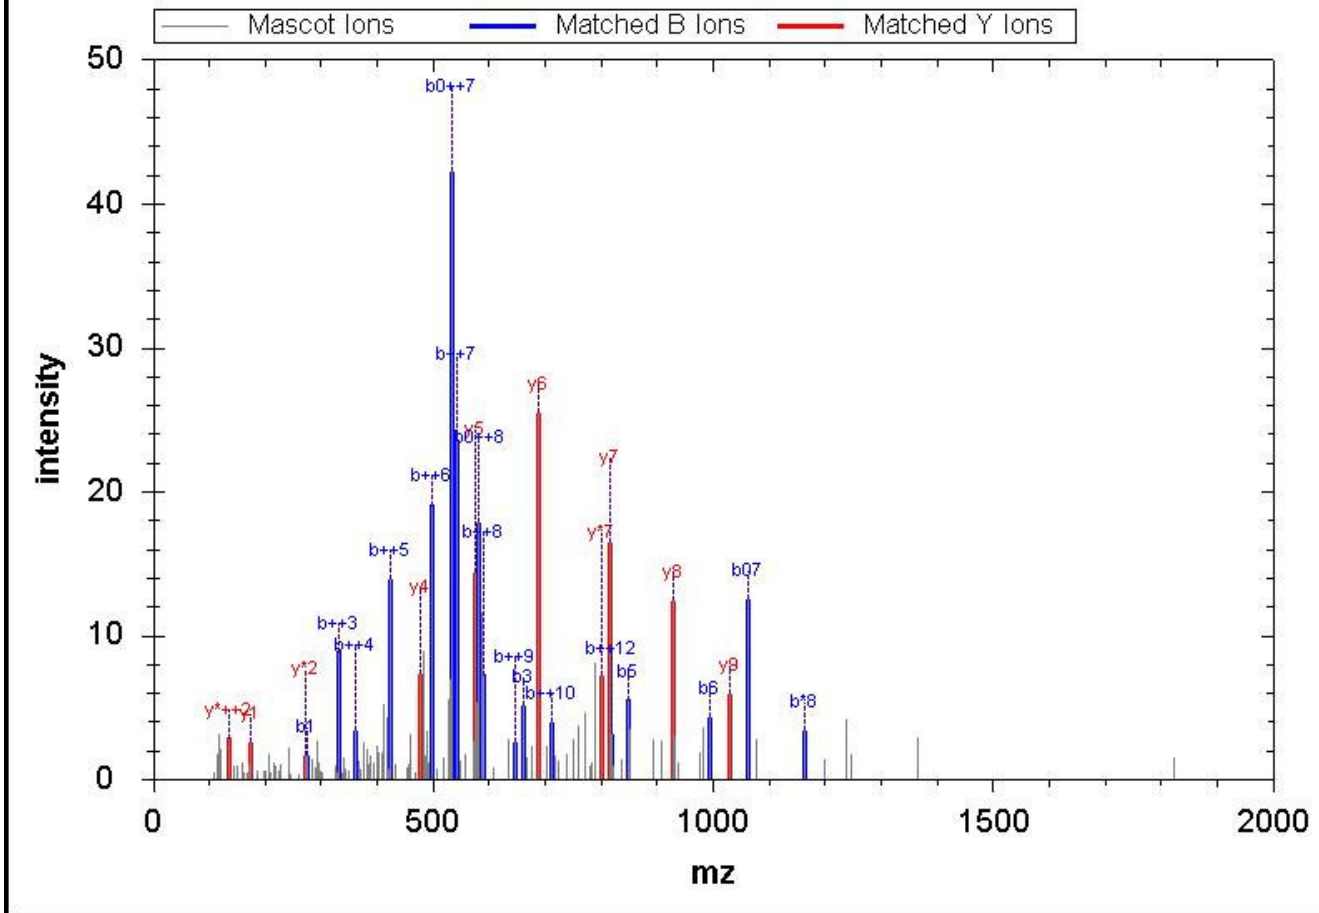

| No | b        | b++    | b*       | b*++   | b0       | b0++   | Seq | y        | y++    | y*       | y*++   | y0       | y0++   | RevNo |
|----|----------|--------|----------|--------|----------|--------|-----|----------|--------|----------|--------|----------|--------|-------|
| 1  | 274.15   | 137.58 |          |        | 256.14   | 128.57 | E   |          |        |          |        |          |        | 16    |
| 2  | 546.35   | 273.68 | 529.32   | 265.16 | 528.34   | 264.67 | K   | 1,836.02 | 918.51 | 1,818.99 | 910.00 | 1,818.01 | 909.51 | 15    |
| 3  | 661.38   | 331.19 | 644.35   | 322.68 | 643.37   | 322.19 | D   | 1,563.82 | 782.41 | 1,546.79 | 773.90 | 1,545.81 | 773.41 | 14    |
| 4  | 718.40   | 359.70 | 701.37   | 351.19 | 700.39   | 350.70 | G   | 1,448.79 | 724.90 | 1,431.77 | 716.39 | 1,430.78 | 715.89 | 13    |
| 5  | 847.44   | 424.22 | 830.41   | 415.71 | 829.43   | 415.22 | E   | 1,391.77 | 696.39 | 1,374.74 | 687.88 | 1,373.76 | 687.38 | 12    |
| 6  | 994.51   | 497.76 | 977.48   | 489.24 | 976.50   | 488.75 | F   | 1,262.73 | 631.87 | 1,245.70 | 623.35 | 1,244.72 | 622.86 | 11    |
| 7  | 1,081.54 | 541.27 | 1,064.51 | 532.76 | 1,063.53 | 532.27 | S   | 1,115.66 | 558.33 | 1,098.63 | 549.82 | 1,097.65 | 549.33 | 10    |
| 8  | 1,180.61 | 590.81 | 1,163.58 | 582.29 | 1,162.60 | 581.80 | V   | 1,028.63 | 514.82 | 1,011.60 | 506.30 |          |        | 9     |
| 9  | 1,293.69 | 647.35 | 1,276.67 | 638.84 | 1,275.68 | 638.34 | L   | 929.56   | 465.28 | 912.53   | 456.77 |          |        | 8     |
| 10 | 1,421.75 | 711.38 | 1,404.72 | 702.87 | 1,403.74 | 702.37 | Q   | 816.48   | 408.74 | 799.45   | 400.23 |          |        | 7     |
| 11 | 1,534.84 | 767.92 | 1,517.81 | 759.41 | 1,516.82 | 758.92 | L   | 688.42   | 344.71 | 671.39   | 336.20 |          |        | 6     |
| 12 | 1,633.90 | 817.46 | 1,616.88 | 808.94 | 1,615.89 | 808.45 | V   | 575.33   | 288.17 | 558.31   | 279.66 |          |        | 5     |
| 13 | 1,690.93 | 845.97 | 1,673.90 | 837.45 | 1,672.91 | 836.96 | G   | 476.26   | 238.64 | 459.24   | 230.12 |          |        | 4     |
| 14 | 1,821.97 | 911.49 | 1,804.94 | 902.97 | 1,803.96 | 902.48 | M   | 419.24   | 210.13 | 402.22   | 201.61 |          |        | 3     |
| 15 | 1,935.05 | 968.03 | 1,918.02 | 959.52 | 1,917.04 | 959.02 | L   | 288.20   | 144.61 | 271.18   | 136.09 |          |        | 2     |
| 16 |          |        |          |        |          |        | R   | 175.12   | 88.06  | 158.09   | 79.55  |          |        | 1     |

Query 24487 Hit 1

MS/MS Fragmentation of **YGLLVGGAASHR**

Found in [sp|Q15274|NADC\\_HUMAN](#), Nicotinate-nucleotide pyrophosphorylase [carboxylating] OS=Homo sapiens GN=QPRT PE=1 SV=3

Match to Query 24487: 1343.744from(448.9219,3+)

Title: 383: Sum of 2 scans in range 909 (rt=29.9275, f=4, i=251) to 910 (rt=29.9529, f=4, i=252)

[D:\lab212\membrane\GraceJoyce\iTRAQ\_37\_2.raw]

Data File: Submitted from 20120508-1(merge) by Mascot Daemon on JOYCE-VAIO

Monoisotopic mass of neutral peptide Mr(calc): 1343.744

Variable modifications:

Ions Score: 48.74 Expect: 0.010

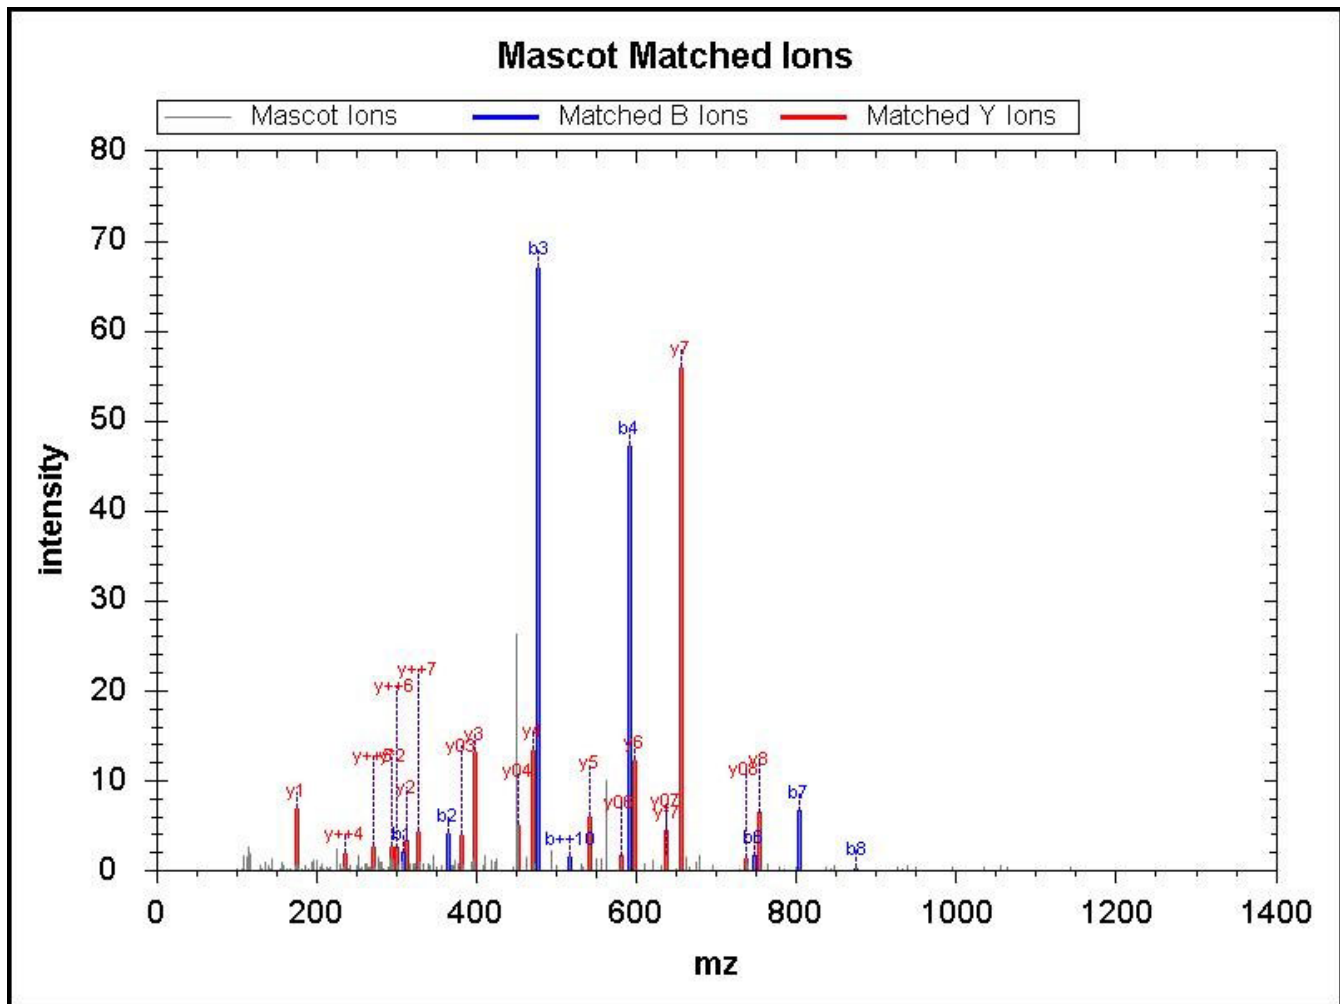

| No | b        | b++    | b0       | b0++   | Seq | y        | y++    | y*       | y*++   | y0       | y0++   | RevNo |
|----|----------|--------|----------|--------|-----|----------|--------|----------|--------|----------|--------|-------|
| 1  | 308.17   | 154.59 |          |        | Y   |          |        |          |        |          |        | 12    |
| 2  | 365.19   | 183.10 |          |        | G   | 1,037.59 | 519.30 | 1,020.56 | 510.78 | 1,019.57 | 510.29 | 11    |
| 3  | 478.28   | 239.64 |          |        | L   | 980.56   | 490.79 | 963.54   | 482.27 | 962.55   | 481.78 | 10    |
| 4  | 591.36   | 296.18 |          |        | L   | 867.48   | 434.24 | 850.45   | 425.73 | 849.47   | 425.24 | 9     |
| 5  | 690.43   | 345.72 |          |        | V   | 754.40   | 377.70 | 737.37   | 369.19 | 736.38   | 368.70 | 8     |
| 6  | 747.45   | 374.23 |          |        | G   | 655.33   | 328.17 | 638.30   | 319.65 | 637.32   | 319.16 | 7     |
| 7  | 804.47   | 402.74 |          |        | G   | 598.31   | 299.66 | 581.28   | 291.14 | 580.30   | 290.65 | 6     |
| 8  | 875.51   | 438.26 |          |        | A   | 541.28   | 271.15 | 524.26   | 262.63 | 523.27   | 262.14 | 5     |
| 9  | 946.55   | 473.78 |          |        | A   | 470.25   | 235.63 | 453.22   | 227.11 | 452.24   | 226.62 | 4     |
| 10 | 1,033.58 | 517.29 | 1,015.57 | 508.29 | S   | 399.21   | 200.11 | 382.18   | 191.60 | 381.20   | 191.10 | 3     |
| 11 | 1,170.64 | 585.82 | 1,152.63 | 576.82 | H   | 312.18   | 156.59 | 295.15   | 148.08 |          |        | 2     |
| 12 |          |        |          |        | R   | 175.12   | 88.06  | 158.09   | 79.55  |          |        | 1     |

Query 8386 Hit 1

MS/MS Fragmentation of L F V I G G K

Found in sp|Q8NAB2|KBTB3\_HUMAN, Kelch repeat and BTB domain-containing protein 3 OS=Homo sapiens GN=KBTBD3 PE=2 SV=2

Match to Query 8386: 1020.653from(511.3337,2+)

Title: 548: Sum of 2 scans in range 1226 (rt=37.2906, f=4, i=369) to 1227 (rt=37.316, f=4, i=370)

[D:\lab212\membrane\Grace\Joyce\iTRAQ\_33\_2.raw]

Data File: Submitted from 20120508-1(merge) by Mascot Daemon on JOYCE-VAIO

Monoisotopic mass of neutral peptide Mr(calc): 1020.653

Variable modifications:

K7 iTRAQ4plex (K)  
 Ions Score: 48.68 Expect: 0.007

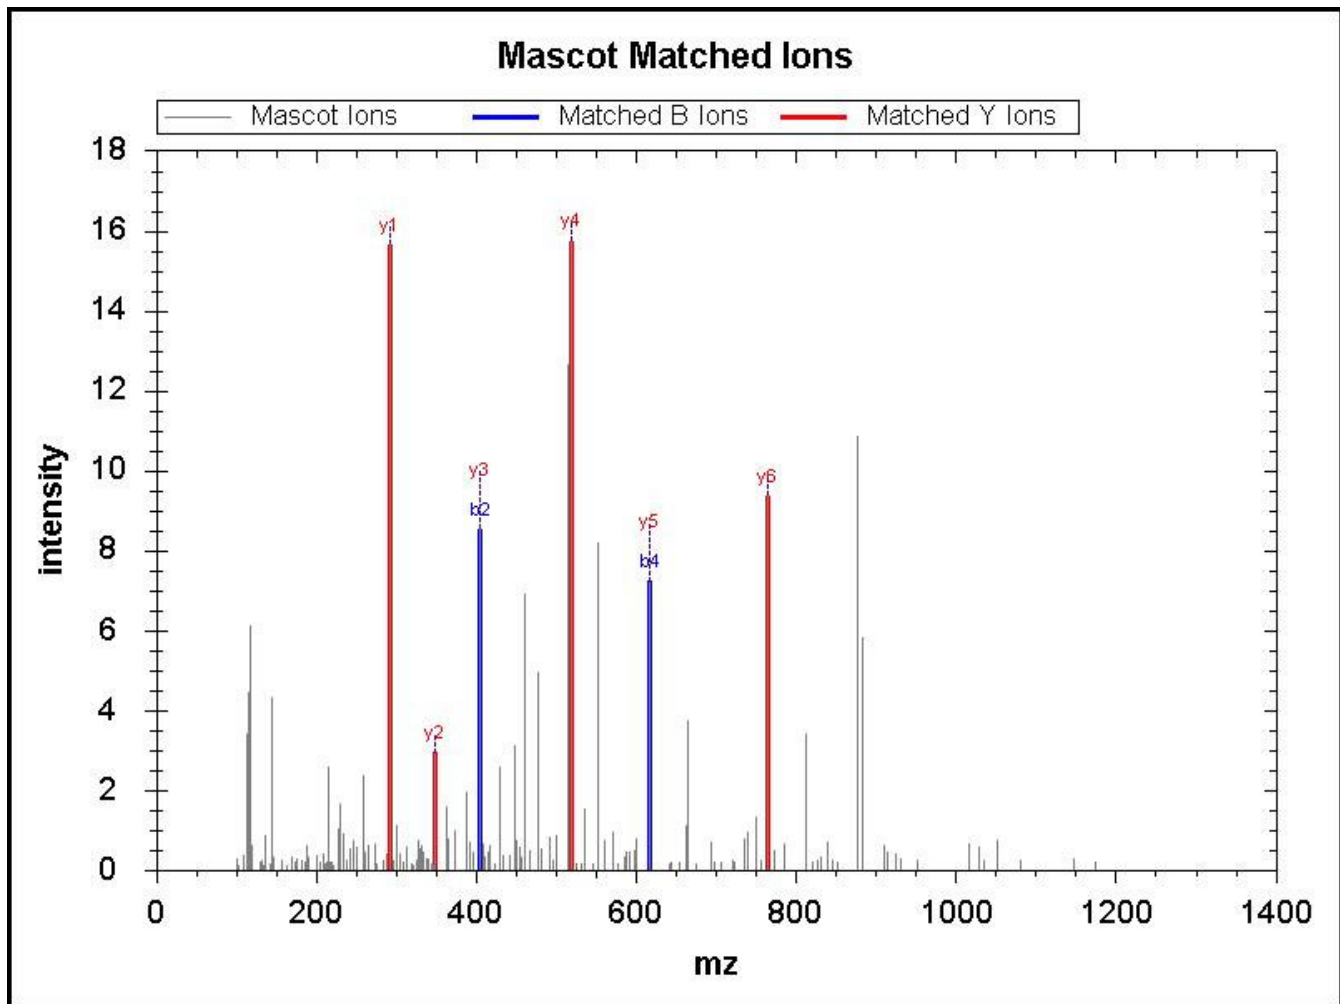

| No | b      | b++    | Seq | y      | y++    | y*     | y*++   | RevNo |
|----|--------|--------|-----|--------|--------|--------|--------|-------|
| 1  | 258.19 | 129.60 | L   |        |        |        |        | 7     |
| 2  | 405.26 | 203.13 | F   | 764.48 | 382.74 | 747.45 | 374.23 | 6     |
| 3  | 504.33 | 252.67 | V   | 617.41 | 309.21 | 600.38 | 300.70 | 5     |
| 4  | 617.41 | 309.21 | I   | 518.34 | 259.67 | 501.32 | 251.16 | 4     |
| 5  | 674.44 | 337.72 | G   | 405.26 | 203.13 | 388.23 | 194.62 | 3     |
| 6  | 731.46 | 366.23 | G   | 348.24 | 174.62 | 331.21 | 166.11 | 2     |
| 7  |        |        | K   | 291.21 | 146.11 | 274.19 | 137.60 | 1     |

Query 55320 Hit 1

MS/MS Fragmentation of **EEEESESSTSDDKR**

Found in **sp|Q7Z6M4|MTER2\_HUMAN**, mTERF domain-containing protein 2 OS=Homo sapiens GN=MTERFD2 PE=1 SV=3

Match to Query 55320: 1914.856from(639.2927,3+)

Title: 4: Sum of 2 scans in range 101 (rt=11.8732, f=2, i=14) to 102 (rt=11.8986, f=2, i=15)

[D:\lab212\membrane\GraceJoyce\iTRAQ\_44\_2.raw]

Data File: Submitted from 20120508-1(merge) by Mascot Daemon on JOYCE-VAIO

Monoisotopic mass of neutral peptide Mr(calc): 1914.856

Variable modifications:

K13 iTRAQ4plex (K)

Ions Score: 48.64 Expect: 0.007

### Mascot Matched Ions

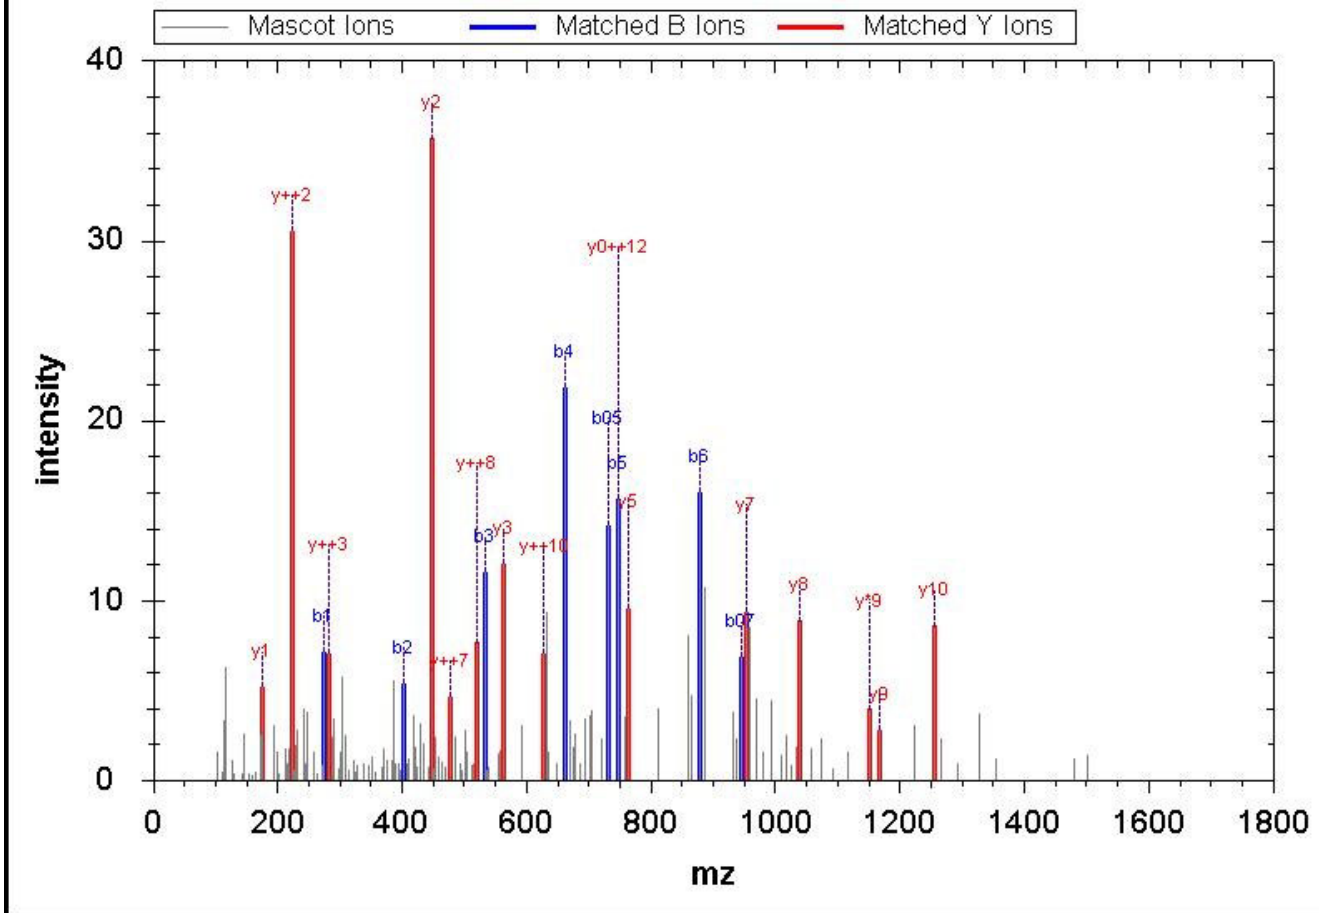

| No | b        | b++    | b*       | b*++   | b0       | b0++   | Seq | y        | y++    | y*       | y*++   | y0       | y0++   | RevNo |
|----|----------|--------|----------|--------|----------|--------|-----|----------|--------|----------|--------|----------|--------|-------|
| 1  | 274.15   | 137.58 |          |        | 256.14   | 128.57 | E   |          |        |          |        |          |        | 14    |
| 2  | 403.19   | 202.10 |          |        | 385.18   | 193.10 | E   | 1,642.72 | 821.86 | 1,625.69 | 813.35 | 1,624.71 | 812.86 | 13    |
| 3  | 532.24   | 266.62 |          |        | 514.23   | 257.62 | E   | 1,513.67 | 757.34 | 1,496.65 | 748.83 | 1,495.66 | 748.34 | 12    |
| 4  | 661.28   | 331.14 |          |        | 643.27   | 322.14 | E   | 1,384.63 | 692.82 | 1,367.60 | 684.31 | 1,366.62 | 683.81 | 11    |
| 5  | 748.31   | 374.66 |          |        | 730.30   | 365.65 | S   | 1,255.59 | 628.30 | 1,238.56 | 619.78 | 1,237.58 | 619.29 | 10    |
| 6  | 877.35   | 439.18 |          |        | 859.34   | 430.18 | E   | 1,168.56 | 584.78 | 1,151.53 | 576.27 | 1,150.55 | 575.78 | 9     |
| 7  | 964.39   | 482.70 |          |        | 946.38   | 473.69 | S   | 1,039.51 | 520.26 | 1,022.49 | 511.75 | 1,021.50 | 511.26 | 8     |
| 8  | 1,051.42 | 526.21 |          |        | 1,033.41 | 517.21 | S   | 952.48   | 476.74 | 935.46   | 468.23 | 934.47   | 467.74 | 7     |
| 9  | 1,152.47 | 576.74 |          |        | 1,134.46 | 567.73 | T   | 865.45   | 433.23 | 848.42   | 424.72 | 847.44   | 424.22 | 6     |
| 10 | 1,239.50 | 620.25 |          |        | 1,221.49 | 611.25 | S   | 764.40   | 382.70 | 747.38   | 374.19 | 746.39   | 373.70 | 5     |
| 11 | 1,354.53 | 677.77 |          |        | 1,336.51 | 668.76 | D   | 677.37   | 339.19 | 660.34   | 330.68 | 659.36   | 330.18 | 4     |
| 12 | 1,469.55 | 735.28 |          |        | 1,451.54 | 726.27 | D   | 562.34   | 281.68 | 545.32   | 273.16 | 544.33   | 272.67 | 3     |
| 13 | 1,741.75 | 871.38 | 1,724.72 | 862.86 | 1,723.74 | 862.37 | K   | 447.32   | 224.16 | 430.29   | 215.65 |          |        | 2     |
| 14 |          |        |          |        |          |        | R   | 175.12   | 88.06  | 158.09   | 79.55  |          |        | 1     |

Query 43782 Hit 1

MS/MS Fragmentation of NIVHNYSEAEIK

Found in sp|Q9Y6I3|EPN1\_HUMAN, Epsin-1 OS=Homo sapiens GN=EPN1 PE=1 SV=2

Match to Query 43782: 1703.912from(568.9781,3+)

Title: 311: Sum of 2 scans in range 713 (rt=25.8318, f=4, i=212) to 714 (rt=25.8572, f=4, i=213)

[D:\lab212\membrane\Grace\Joyce\iTRAQ\_42\_2.raw]

Data File: Submitted from 20120508-1(merge) by Mascot Daemon on JOYCE-VAIO

Monoisotopic mass of neutral peptide Mr(calc): 1703.912

Variable modifications:

K12 iTRAQ4plex (K)

Ions Score: 48.6 Expect: 0.012

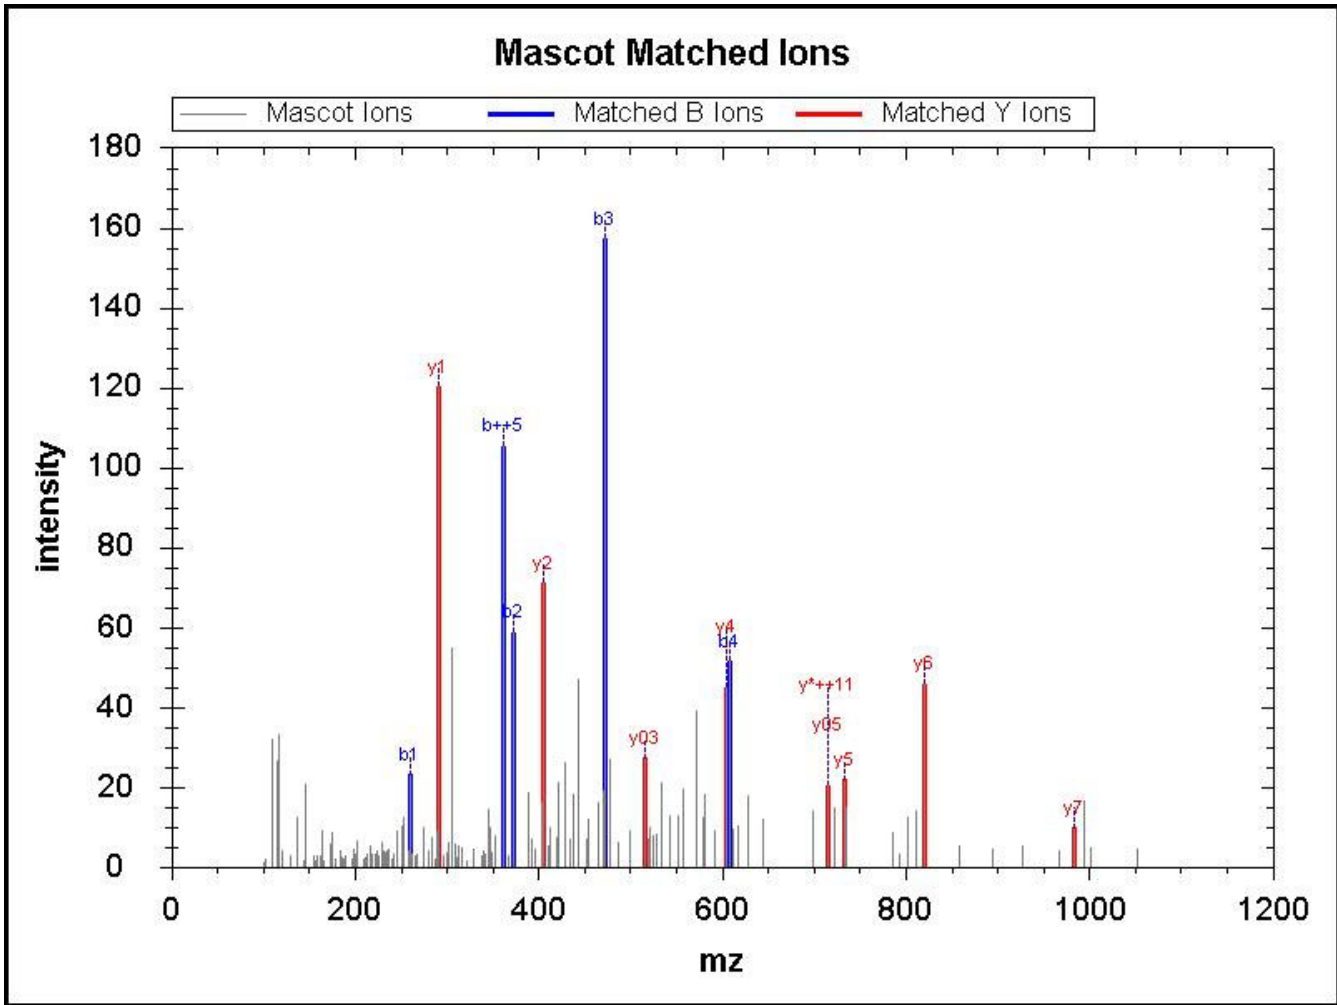

| No | b        | b++    | b*       | b*++   | b0       | b0++   | Seq | y        | y++    | y*       | y*++   | y0       | y0++   | RevNo |
|----|----------|--------|----------|--------|----------|--------|-----|----------|--------|----------|--------|----------|--------|-------|
| 1  | 259.15   | 130.08 | 242.13   | 121.57 |          |        | N   |          |        |          |        |          |        | 12    |
| 2  | 372.24   | 186.62 | 355.21   | 178.11 |          |        | I   | 1,446.77 | 723.89 | 1,429.74 | 715.38 | 1,428.76 | 714.88 | 11    |
| 3  | 471.30   | 236.16 | 454.28   | 227.64 |          |        | V   | 1,333.69 | 667.35 | 1,316.66 | 658.83 | 1,315.68 | 658.34 | 10    |
| 4  | 608.36   | 304.69 | 591.34   | 296.17 |          |        | H   | 1,234.62 | 617.81 | 1,217.59 | 609.30 | 1,216.61 | 608.81 | 9     |
| 5  | 722.41   | 361.71 | 705.38   | 353.19 |          |        | N   | 1,097.56 | 549.28 | 1,080.53 | 540.77 | 1,079.55 | 540.28 | 8     |
| 6  | 885.47   | 443.24 | 868.44   | 434.73 |          |        | Y   | 983.52   | 492.26 | 966.49   | 483.75 | 965.51   | 483.26 | 7     |
| 7  | 972.50   | 486.75 | 955.48   | 478.24 | 954.49   | 477.75 | S   | 820.45   | 410.73 | 803.43   | 402.22 | 802.44   | 401.72 | 6     |
| 8  | 1,101.54 | 551.28 | 1,084.52 | 542.76 | 1,083.53 | 542.27 | E   | 733.42   | 367.21 | 716.39   | 358.70 | 715.41   | 358.21 | 5     |
| 9  | 1,172.58 | 586.79 | 1,155.56 | 578.28 | 1,154.57 | 577.79 | A   | 604.38   | 302.69 | 587.35   | 294.18 | 586.37   | 293.69 | 4     |
| 10 | 1,301.62 | 651.32 | 1,284.60 | 642.80 | 1,283.61 | 642.31 | E   | 533.34   | 267.17 | 516.31   | 258.66 | 515.33   | 258.17 | 3     |
| 11 | 1,414.71 | 707.86 | 1,397.68 | 699.34 | 1,396.70 | 698.85 | I   | 404.30   | 202.65 | 387.27   | 194.14 |          |        | 2     |
| 12 |          |        |          |        |          |        | K   | 291.21   | 146.11 | 274.19   | 137.60 |          |        | 1     |

Query 90891 Hit 1

MS/MS Fragmentation of **EIYLEVIHNLPDFELLSANTLEDR**

Found in **sp|Q8IXB1|DJC10\_HUMAN**, DnaJ homolog subfamily C member 10 OS=Homo sapiens GN=DNAJC10 PE=1 SV=2

Match to Query 90891: 2986.542from(996.5215,3+)

Title: 971: Sum of 2 scans in range 2777 (rt=68.6385, f=4, i=623) to 2778 (rt=68.6638, f=4, i=624)

[D:\lab212\membrane\GraceJoyce\iTRAQ\_29\_2.raw]

Data File:Submitted from 20120508-1(merge) by Mascot Daemon on JOYCE-VAIO

Monoisotopic mass of neutral peptide Mr(calc): 2986.542

Variable modifications:

Ions Score: 48.56 Expect: 0.012



Query 89963 Hit 1

MS/MS Fragmentation of **LGDYHFYFGFGTDVDYETAFIHYR**

Found in **sp|Q9UBV2|SEL1L1\_HUMAN**, Protein sel-1 homolog 1 OS=Homo sapiens GN=SEL1L PE=1 SV=3

Match to Query 89963: 2929.359 from (733.3471, 4+)

Title: 935: Scan 2023 (rt=55.2646, f=3, i=320) [D:\lab212\membrane\Grace\Joyce\iTRAQ\_45\_1.raw]

Data File: Submitted from 20120508-1(merge) by Mascot Daemon on JOYCE-VAIO

Monoisotopic mass of neutral peptide Mr(calc): 2929.359

Variable modifications:

Ions Score: 48.52 Expect: 0.010

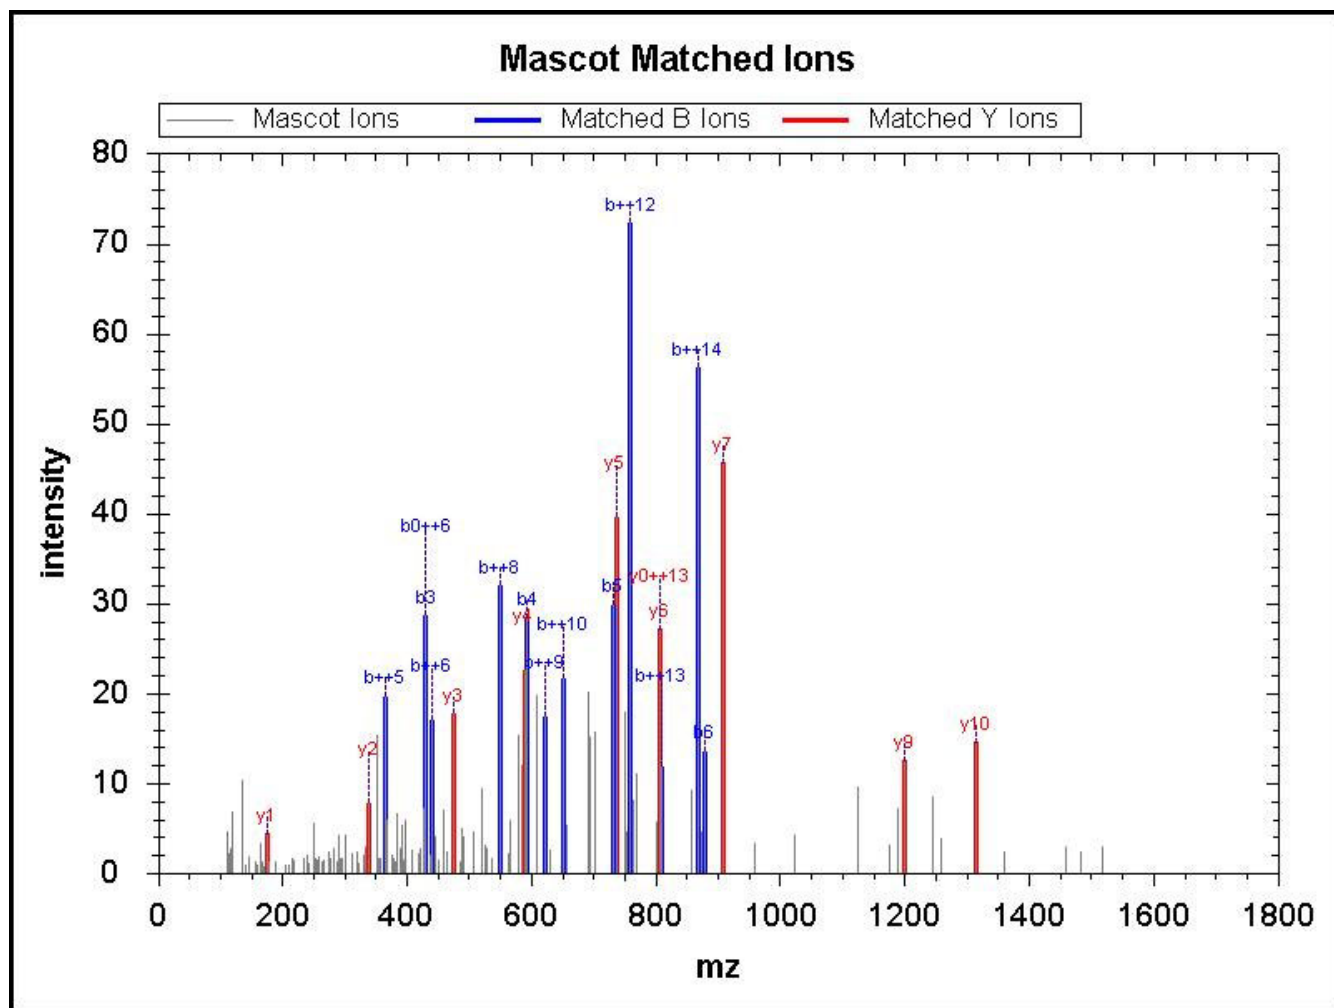

| No | b        | b++    | b0       | b0++   | Seq | y        | y++      | y*       | y*++     | y0       | y0++     | RevNo |
|----|----------|--------|----------|--------|-----|----------|----------|----------|----------|----------|----------|-------|
| 1  | 258.19   | 129.60 |          |        | L   |          |          |          |          |          |          | 23    |
| 2  | 315.21   | 158.11 |          |        | G   | 2,673.17 | 1,337.09 | 2,656.14 | 1,328.57 | 2,655.16 | 1,328.08 | 22    |
| 3  | 430.24   | 215.62 | 412.23   | 206.62 | D   | 2,616.15 | 1,308.58 | 2,599.12 | 1,300.06 | 2,598.14 | 1,299.57 | 21    |
| 4  | 593.31   | 297.16 | 575.29   | 288.15 | Y   | 2,501.12 | 1,251.06 | 2,484.09 | 1,242.55 | 2,483.11 | 1,242.06 | 20    |
| 5  | 730.36   | 365.69 | 712.35   | 356.68 | H   | 2,338.06 | 1,169.53 | 2,321.03 | 1,161.02 | 2,320.05 | 1,160.53 | 19    |
| 6  | 877.43   | 439.22 | 859.42   | 430.21 | F   | 2,201.00 | 1,101.00 | 2,183.97 | 1,092.49 | 2,182.99 | 1,092.00 | 18    |
| 7  | 1,040.50 | 520.75 | 1,022.49 | 511.75 | Y   | 2,053.93 | 1,027.47 | 2,036.90 | 1,018.96 | 2,035.92 | 1,018.46 | 17    |
| 8  | 1,097.52 | 549.26 | 1,079.51 | 540.26 | G   | 1,890.87 | 945.94   | 1,873.84 | 937.42   | 1,872.86 | 936.93   | 16    |
| 9  | 1,244.59 | 622.80 | 1,226.58 | 613.79 | F   | 1,833.84 | 917.43   | 1,816.82 | 908.91   | 1,815.83 | 908.42   | 15    |
| 10 | 1,301.61 | 651.31 | 1,283.60 | 642.30 | G   | 1,686.78 | 843.89   | 1,669.75 | 835.38   | 1,668.77 | 834.89   | 14    |
| 11 | 1,402.65 | 701.83 | 1,384.64 | 692.83 | T   | 1,629.75 | 815.38   | 1,612.73 | 806.87   | 1,611.74 | 806.38   | 13    |
| 12 | 1,517.68 | 759.34 | 1,499.67 | 750.34 | D   | 1,528.71 | 764.86   | 1,511.68 | 756.34   | 1,510.70 | 755.85   | 12    |
| 13 | 1,616.75 | 808.88 | 1,598.74 | 799.87 | V   | 1,413.68 | 707.34   | 1,396.65 | 698.83   | 1,395.67 | 698.34   | 11    |

|    |          |          |          |          |   |          |        |          |        |          |        |    |
|----|----------|----------|----------|----------|---|----------|--------|----------|--------|----------|--------|----|
| 14 | 1,731.78 | 866.39   | 1,713.77 | 857.39   | D | 1,314.61 | 657.81 | 1,297.58 | 649.30 | 1,296.60 | 648.80 | 10 |
| 15 | 1,894.84 | 947.92   | 1,876.83 | 938.92   | Y | 1,199.58 | 600.30 | 1,182.56 | 591.78 | 1,181.57 | 591.29 | 9  |
| 16 | 2,023.88 | 1,012.45 | 2,005.87 | 1,003.44 | E | 1,036.52 | 518.76 | 1,019.49 | 510.25 | 1,018.51 | 509.76 | 8  |
| 17 | 2,124.93 | 1,062.97 | 2,106.92 | 1,053.96 | T | 907.48   | 454.24 | 890.45   | 445.73 | 889.47   | 445.24 | 7  |
| 18 | 2,195.97 | 1,098.49 | 2,177.96 | 1,089.48 | A | 806.43   | 403.72 | 789.40   | 395.21 |          |        | 6  |
| 19 | 2,343.04 | 1,172.02 | 2,325.03 | 1,163.02 | F | 735.39   | 368.20 | 718.37   | 359.69 |          |        | 5  |
| 20 | 2,456.12 | 1,228.56 | 2,438.11 | 1,219.56 | I | 588.33   | 294.67 | 571.30   | 286.15 |          |        | 4  |
| 21 | 2,593.18 | 1,297.09 | 2,575.17 | 1,288.09 | H | 475.24   | 238.12 | 458.21   | 229.61 |          |        | 3  |
| 22 | 2,756.24 | 1,378.62 | 2,738.23 | 1,369.62 | Y | 338.18   | 169.59 | 321.16   | 161.08 |          |        | 2  |
| 23 |          |          |          |          | R | 175.12   | 88.06  | 158.09   | 79.55  |          |        | 1  |

Query 81278 Hit 1

MS/MS Fragmentation of **EVIQLEELGVGIGVVHAGYER**

Found in **sp|Q9Y2G8|DJC16\_HUMAN**, DnaJ homolog subfamily C member 16 OS=Homo sapiens GN=DNAJC16 PE=2 SV=3

Match to Query 81278: 2539.325from(847.4491,3+)

Title: 1088: Scan 2409 (rt=63.581, f=3, i=373) [D:\lab212\membrane\Grace\Joyce\ITRAQ\_31\_1.raw]

Data File: Submitted from 20120508-1(merge) by Mascot Daemon on JOYCE-VAIO

Monoisotopic mass of neutral peptide Mr(calc): 2539.325

Variable modifications:

Ions Score: 48.4 Expect: 0.013

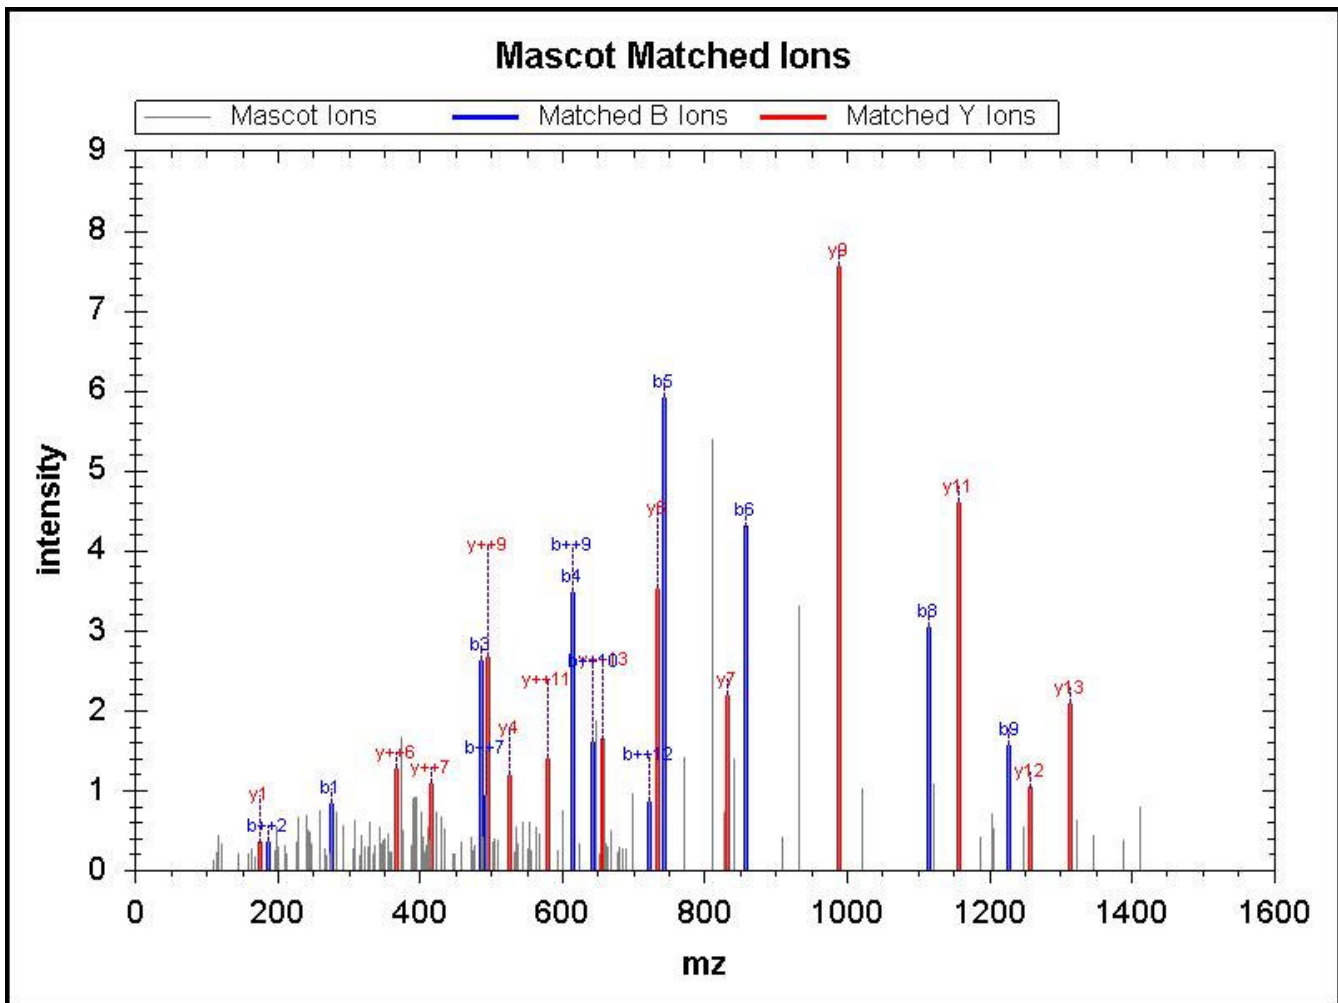

| No | b      | b++    | b*     | b*++   | b0     | b0++   | Seq | y        | y++      | y*       | y*++     | y0       | y0++     | RevNo |
|----|--------|--------|--------|--------|--------|--------|-----|----------|----------|----------|----------|----------|----------|-------|
| 1  | 274.15 | 137.58 |        |        | 256.14 | 128.57 | E   |          |          |          |          |          |          | 22    |
| 2  | 373.22 | 187.11 |        |        | 355.21 | 178.11 | V   | 2,267.20 | 1,134.11 | 2,250.18 | 1,125.59 | 2,249.19 | 1,125.10 | 21    |
| 3  | 486.30 | 243.66 |        |        | 468.29 | 234.65 | I   | 2,168.13 | 1,084.57 | 2,151.11 | 1,076.06 | 2,150.12 | 1,075.57 | 20    |
| 4  | 614.36 | 307.69 | 597.34 | 299.17 | 596.35 | 298.68 | Q   | 2,055.05 | 1,028.03 | 2,038.02 | 1,019.52 | 2,037.04 | 1,019.02 | 19    |
| 5  | 743.41 | 372.21 | 726.38 | 363.69 | 725.40 | 363.20 | E   | 1,926.99 | 964.00   | 1,909.97 | 955.49   | 1,908.98 | 954.99   | 18    |



|    |          |          |          |          |          |          |   |          |        |          |        |          |        |    |
|----|----------|----------|----------|----------|----------|----------|---|----------|--------|----------|--------|----------|--------|----|
| 6  | 856.49   | 428.75   | 839.46   | 420.24   | 838.48   | 419.74   | L | 1,797.95 | 899.48 | 1,780.92 | 890.97 | 1,779.94 | 890.47 | 17 |
| 7  | 985.53   | 493.27   | 968.51   | 484.76   | 967.52   | 484.26   | E | 1,684.87 | 842.94 | 1,667.84 | 834.42 | 1,666.85 | 833.93 | 16 |
| 8  | 1,114.57 | 557.79   | 1,097.55 | 549.28   | 1,096.56 | 548.79   | E | 1,555.82 | 778.42 | 1,538.80 | 769.90 | 1,537.81 | 769.41 | 15 |
| 9  | 1,227.66 | 614.33   | 1,210.63 | 605.82   | 1,209.65 | 605.33   | L | 1,426.78 | 713.89 | 1,409.75 | 705.38 | 1,408.77 | 704.89 | 14 |
| 10 | 1,284.68 | 642.84   | 1,267.65 | 634.33   | 1,266.67 | 633.84   | G | 1,313.70 | 657.35 | 1,296.67 | 648.84 | 1,295.69 | 648.35 | 13 |
| 11 | 1,383.75 | 692.38   | 1,366.72 | 683.86   | 1,365.74 | 683.37   | V | 1,256.67 | 628.84 | 1,239.65 | 620.33 | 1,238.66 | 619.84 | 12 |
| 12 | 1,440.77 | 720.89   | 1,423.74 | 712.38   | 1,422.76 | 711.88   | G | 1,157.61 | 579.31 | 1,140.58 | 570.79 | 1,139.60 | 570.30 | 11 |
| 13 | 1,553.85 | 777.43   | 1,536.83 | 768.92   | 1,535.84 | 768.43   | I | 1,100.58 | 550.80 | 1,083.56 | 542.28 | 1,082.57 | 541.79 | 10 |
| 14 | 1,610.88 | 805.94   | 1,593.85 | 797.43   | 1,592.87 | 796.94   | G | 987.50   | 494.25 | 970.47   | 485.74 | 969.49   | 485.25 | 9  |
| 15 | 1,709.94 | 855.48   | 1,692.92 | 846.96   | 1,691.93 | 846.47   | V | 930.48   | 465.74 | 913.45   | 457.23 | 912.47   | 456.74 | 8  |
| 16 | 1,809.01 | 905.01   | 1,791.99 | 896.50   | 1,791.00 | 896.00   | V | 831.41   | 416.21 | 814.38   | 407.70 | 813.40   | 407.20 | 7  |
| 17 | 1,946.07 | 973.54   | 1,929.05 | 965.03   | 1,928.06 | 964.53   | H | 732.34   | 366.67 | 715.32   | 358.16 | 714.33   | 357.67 | 6  |
| 18 | 2,017.11 | 1,009.06 | 2,000.08 | 1,000.54 | 1,999.10 | 1,000.05 | A | 595.28   | 298.15 | 578.26   | 289.63 | 577.27   | 289.14 | 5  |
| 19 | 2,074.13 | 1,037.57 | 2,057.10 | 1,029.06 | 2,056.12 | 1,028.56 | G | 524.25   | 262.63 | 507.22   | 254.11 | 506.24   | 253.62 | 4  |
| 20 | 2,237.19 | 1,119.10 | 2,220.17 | 1,110.59 | 2,219.18 | 1,110.10 | Y | 467.22   | 234.12 | 450.20   | 225.60 | 449.21   | 225.11 | 3  |
| 21 | 2,366.24 | 1,183.62 | 2,349.21 | 1,175.11 | 2,348.23 | 1,174.62 | E | 304.16   | 152.58 | 287.13   | 144.07 | 286.15   | 143.58 | 2  |
| 22 |          |          |          |          |          |          | R | 175.12   | 88.06  | 158.09   | 79.55  |          |        | 1  |

Query 56433 Hit 1

MS/MS Fragmentation of VAHSDKPGSTSTASFR

Found in sp|Q9P0L0|VAPA\_HUMAN, Vesicle-associated membrane protein-associated protein A OS=Homo sapiens GN=VAPA PE=1 SV=3

Match to Query 56433: 1935.007from(484.7591,4+)

Title: 56: Scan 403 (rt=17.7467, f=3, i=23) [D:\lab212\membrane\GraceJoyce\iTRAQ\_51\_2.raw]

Data File:Submitted from 20120508-1(merge) by Mascot Daemon on JOYCE-VAIO

Monoisotopic mass of neutral peptide Mr(calc): 1935.007

Variable modifications:

K6 iTRAQ4plex (K)

Ions Score: 48.3 Expect: 0.014

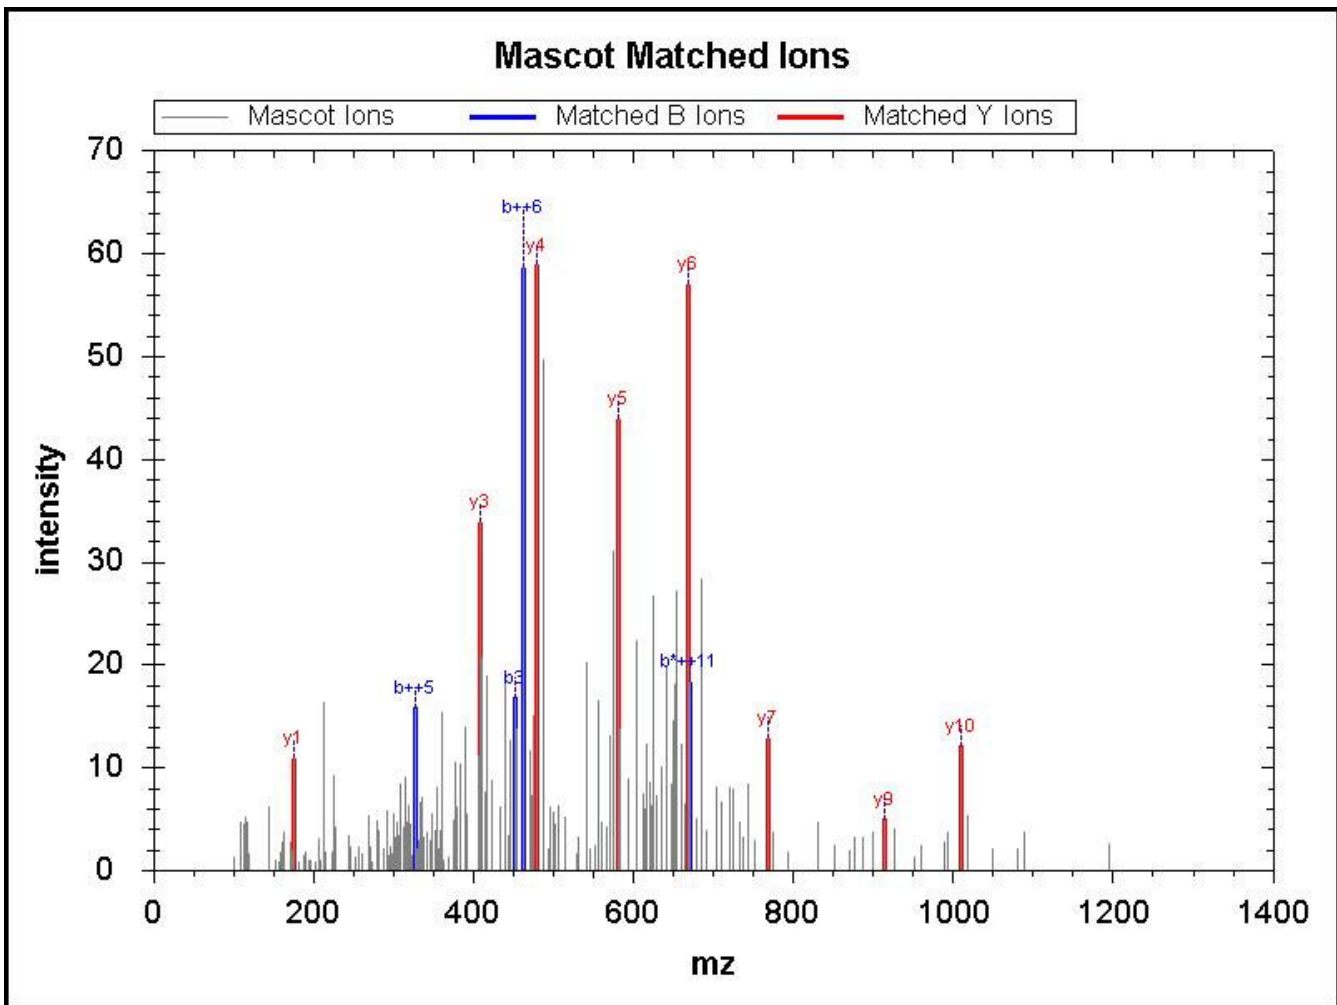

| No | b        | b++    | b*       | b*++   | b0       | b0++   | Seq | y        | y++    | y*       | y*++   | y0       | y0++   | RevNo |
|----|----------|--------|----------|--------|----------|--------|-----|----------|--------|----------|--------|----------|--------|-------|
| 1  | 244.18   | 122.59 |          |        |          |        | V   |          |        |          |        |          |        | 16    |
| 2  | 315.21   | 158.11 |          |        |          |        | A   | 1,692.84 | 846.92 | 1,675.82 | 838.41 | 1,674.83 | 837.92 | 15    |
| 3  | 452.27   | 226.64 |          |        |          |        | H   | 1,621.81 | 811.41 | 1,604.78 | 802.89 | 1,603.79 | 802.40 | 14    |
| 4  | 539.31   | 270.16 |          |        | 521.30   | 261.15 | S   | 1,484.75 | 742.88 | 1,467.72 | 734.36 | 1,466.74 | 733.87 | 13    |
| 5  | 654.33   | 327.67 |          |        | 636.32   | 318.66 | D   | 1,397.71 | 699.36 | 1,380.69 | 690.85 | 1,379.70 | 690.36 | 12    |
| 6  | 926.53   | 463.77 | 909.50   | 455.26 | 908.52   | 454.76 | K   | 1,282.69 | 641.85 | 1,265.66 | 633.33 | 1,264.68 | 632.84 | 11    |
| 7  | 1,023.58 | 512.29 | 1,006.56 | 503.78 | 1,005.57 | 503.29 | P   | 1,010.49 | 505.75 | 993.46   | 497.24 | 992.48   | 496.74 | 10    |
| 8  | 1,080.60 | 540.81 | 1,063.58 | 532.29 | 1,062.59 | 531.80 | G   | 913.44   | 457.22 | 896.41   | 448.71 | 895.43   | 448.22 | 9     |
| 9  | 1,167.64 | 584.32 | 1,150.61 | 575.81 | 1,149.63 | 575.32 | S   | 856.42   | 428.71 | 839.39   | 420.20 | 838.41   | 419.71 | 8     |
| 10 | 1,268.68 | 634.85 | 1,251.66 | 626.33 | 1,250.67 | 625.84 | T   | 769.38   | 385.20 | 752.36   | 376.68 | 751.37   | 376.19 | 7     |
| 11 | 1,355.72 | 678.36 | 1,338.69 | 669.85 | 1,337.71 | 669.36 | S   | 668.34   | 334.67 | 651.31   | 326.16 | 650.33   | 325.67 | 6     |
| 12 | 1,456.76 | 728.89 | 1,439.74 | 720.37 | 1,438.75 | 719.88 | T   | 581.30   | 291.16 | 564.28   | 282.64 | 563.29   | 282.15 | 5     |
| 13 | 1,527.80 | 764.40 | 1,510.77 | 755.89 | 1,509.79 | 755.40 | A   | 480.26   | 240.63 | 463.23   | 232.12 | 462.25   | 231.63 | 4     |
| 14 | 1,614.83 | 807.92 | 1,597.81 | 799.41 | 1,596.82 | 798.91 | S   | 409.22   | 205.11 | 392.19   | 196.60 | 391.21   | 196.11 | 3     |
| 15 | 1,761.90 | 881.45 | 1,744.87 | 872.94 | 1,743.89 | 872.45 | F   | 322.19   | 161.60 | 305.16   | 153.08 |          |        | 2     |
| 16 |          |        |          |        |          |        | R   | 175.12   | 88.06  | 158.09   | 79.55  |          |        | 1     |

Query 84824 Hit 1

MS/MS Fragmentation of **YVSEVVIGAPYAVTAELLSHFK**

Found in [sp|Q99447|PCY2\\_HUMAN](#), Ethanolamine-phosphate cytidylyltransferase OS=Homo sapiens GN=PCYT2 PE=1 SV=1  
Match to Query 84824: 2680.469from(894.4969,3+)

Title: 1216: Sum of 2 scans in range 2852 (rt=72.9157, f=2, i=482) to 2853 (rt=72.9411, f=2, i=483)

[D:\lab212\membrane\GraceJoyce\iTRAQ\_32\_2.raw]

Data File: Submitted from 20120508-1(merge) by Mascot Daemon on JOYCE-VAIO

Monoisotopic mass of neutral peptide Mr(calc): 2680.469

Variable modifications:  
 K22 iTRAQ4plex (K)  
 Ions Score: 48.28 Expect: 0.008

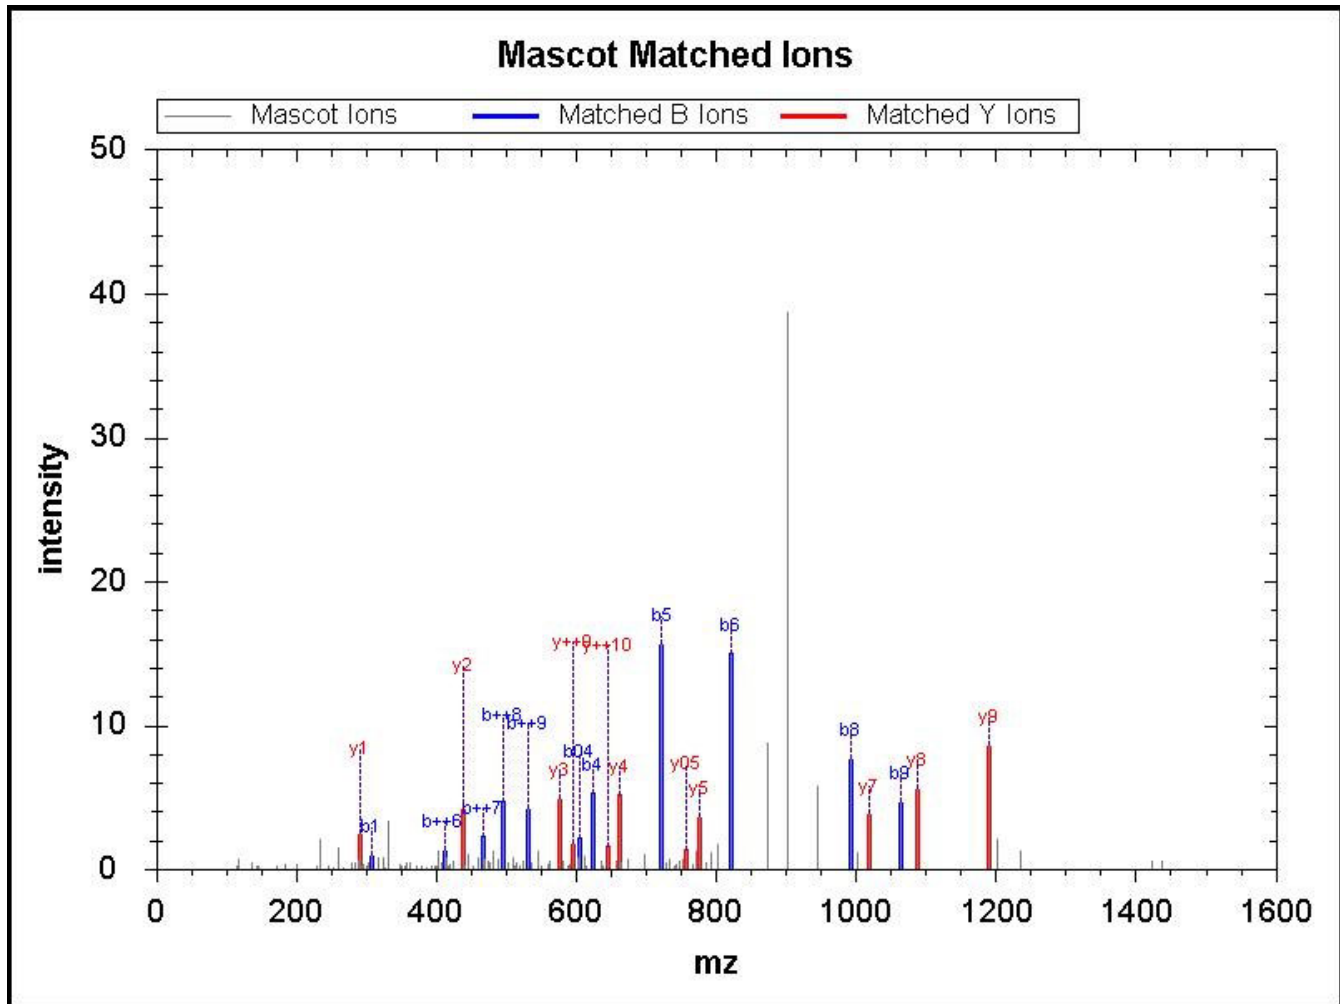

| No | b        | b++      | b0       | b0++     | Seq | y        | y++      | y*       | y*++     | y0       | y0++     | RevNo |
|----|----------|----------|----------|----------|-----|----------|----------|----------|----------|----------|----------|-------|
| 1  | 308.17   | 154.59   |          |          | Y   |          |          |          |          |          |          | 22    |
| 2  | 407.24   | 204.12   |          |          | V   | 2,374.31 | 1,187.66 | 2,357.29 | 1,179.15 | 2,356.30 | 1,178.66 | 21    |
| 3  | 494.27   | 247.64   | 476.26   | 238.63   | S   | 2,275.25 | 1,138.13 | 2,258.22 | 1,129.61 | 2,257.23 | 1,129.12 | 20    |
| 4  | 623.32   | 312.16   | 605.31   | 303.16   | E   | 2,188.21 | 1,094.61 | 2,171.19 | 1,086.10 | 2,170.20 | 1,085.61 | 19    |
| 5  | 722.38   | 361.70   | 704.37   | 352.69   | V   | 2,059.17 | 1,030.09 | 2,042.14 | 1,021.58 | 2,041.16 | 1,021.08 | 18    |
| 6  | 821.45   | 411.23   | 803.44   | 402.22   | V   | 1,960.10 | 980.55   | 1,943.08 | 972.04   | 1,942.09 | 971.55   | 17    |
| 7  | 934.54   | 467.77   | 916.53   | 458.77   | I   | 1,861.03 | 931.02   | 1,844.01 | 922.51   | 1,843.02 | 922.02   | 16    |
| 8  | 991.56   | 496.28   | 973.55   | 487.28   | G   | 1,747.95 | 874.48   | 1,730.92 | 865.97   | 1,729.94 | 865.47   | 15    |
| 9  | 1,062.60 | 531.80   | 1,044.58 | 522.80   | A   | 1,690.93 | 845.97   | 1,673.90 | 837.45   | 1,672.92 | 836.96   | 14    |
| 10 | 1,159.65 | 580.33   | 1,141.64 | 571.32   | P   | 1,619.89 | 810.45   | 1,602.86 | 801.94   | 1,601.88 | 801.44   | 13    |
| 11 | 1,322.71 | 661.86   | 1,304.70 | 652.85   | Y   | 1,522.84 | 761.92   | 1,505.81 | 753.41   | 1,504.83 | 752.92   | 12    |
| 12 | 1,393.75 | 697.38   | 1,375.74 | 688.37   | A   | 1,359.78 | 680.39   | 1,342.75 | 671.88   | 1,341.76 | 671.39   | 11    |
| 13 | 1,492.82 | 746.91   | 1,474.81 | 737.91   | V   | 1,288.74 | 644.87   | 1,271.71 | 636.36   | 1,270.73 | 635.87   | 10    |
| 14 | 1,593.86 | 797.44   | 1,575.85 | 788.43   | T   | 1,189.67 | 595.34   | 1,172.64 | 586.83   | 1,171.66 | 586.33   | 9     |
| 15 | 1,664.90 | 832.95   | 1,646.89 | 823.95   | A   | 1,088.62 | 544.81   | 1,071.60 | 536.30   | 1,070.61 | 535.81   | 8     |
| 16 | 1,793.94 | 897.48   | 1,775.93 | 888.47   | E   | 1,017.58 | 509.30   | 1,000.56 | 500.78   | 999.57   | 500.29   | 7     |
| 17 | 1,907.03 | 954.02   | 1,889.02 | 945.01   | L   | 888.54   | 444.77   | 871.52   | 436.26   | 870.53   | 435.77   | 6     |
| 18 | 2,020.11 | 1,010.56 | 2,002.10 | 1,001.55 | L   | 775.46   | 388.23   | 758.43   | 379.72   | 757.45   | 379.23   | 5     |
| 19 | 2,107.14 | 1,054.08 | 2,089.13 | 1,045.07 | S   | 662.37   | 331.69   | 645.35   | 323.18   | 644.36   | 322.69   | 4     |
| 20 | 2,244.20 | 1,122.61 | 2,226.19 | 1,113.60 | H   | 575.34   | 288.17   | 558.32   | 279.66   |          |          | 3     |
| 21 | 2,391.27 | 1,196.14 | 2,373.26 | 1,187.13 | F   | 438.28   | 219.65   | 421.26   | 211.13   |          |          | 2     |

|    |  |  |  |   |        |        |        |        |  |  |  |   |
|----|--|--|--|---|--------|--------|--------|--------|--|--|--|---|
| 22 |  |  |  | K | 291.21 | 146.11 | 274.19 | 137.60 |  |  |  | 1 |
|----|--|--|--|---|--------|--------|--------|--------|--|--|--|---|

Query 50574 Hit 1

MS/MS Fragmentation of **DLLALFNSFKPK**

Found in **sp|Q9H501|ESF1\_HUMAN**, ESF1 homolog OS=Homo sapiens GN=ESF1 PE=1 SV=1

Match to Query 50574: 1824.093from(609.0384,3+)

Title: 1057: Scan 2287 (rt=61.2607, f=2, i=371) [D:\lab212\membrane\Grace\Joyce\iTRAQ\_43\_1.raw]

Data File: Submitted from 20120508-1(merge) by Mascot Daemon on JOYCE-VAIO

Monoisotopic mass of neutral peptide Mr(calc): 1824.093

Variable modifications:

K10 iTRAQ4plex (K)

K12 iTRAQ4plex (K)

Ions Score: 48.26 Expect: 0.005

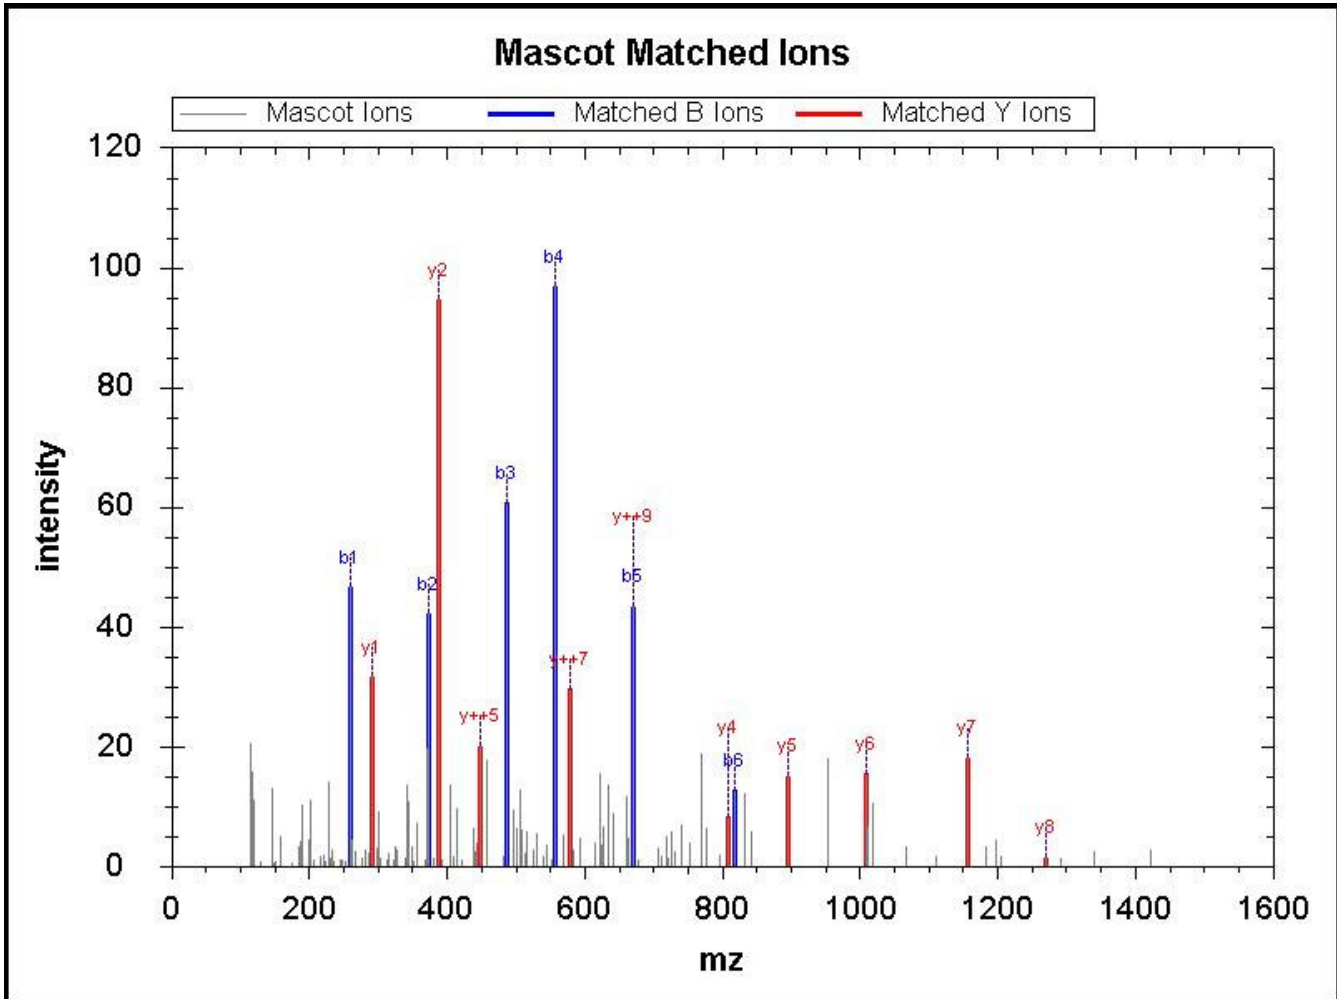

| No | b        | b++    | b*       | b*++   | b0       | b0++   | Seq | y        | y++    | y*       | y*++   | y0       | y0++   | RevNo |
|----|----------|--------|----------|--------|----------|--------|-----|----------|--------|----------|--------|----------|--------|-------|
| 1  | 260.14   | 130.57 |          |        | 242.13   | 121.57 | D   |          |        |          |        |          |        | 12    |
| 2  | 373.22   | 187.11 |          |        | 355.21   | 178.11 | L   | 1,565.97 | 783.49 | 1,548.94 | 774.97 | 1,547.96 | 774.48 | 11    |
| 3  | 486.30   | 243.66 |          |        | 468.29   | 234.65 | L   | 1,452.88 | 726.94 | 1,435.86 | 718.43 | 1,434.87 | 717.94 | 10    |
| 4  | 557.34   | 279.17 |          |        | 539.33   | 270.17 | A   | 1,339.80 | 670.40 | 1,322.77 | 661.89 | 1,321.79 | 661.40 | 9     |
| 5  | 670.43   | 335.72 |          |        | 652.41   | 326.71 | L   | 1,268.76 | 634.88 | 1,251.73 | 626.37 | 1,250.75 | 625.88 | 8     |
| 6  | 817.49   | 409.25 |          |        | 799.48   | 400.25 | F   | 1,155.68 | 578.34 | 1,138.65 | 569.83 | 1,137.67 | 569.34 | 7     |
| 7  | 931.54   | 466.27 | 914.51   | 457.76 | 913.53   | 457.27 | N   | 1,008.61 | 504.81 | 991.58   | 496.29 | 990.60   | 495.80 | 6     |
| 8  | 1,018.57 | 509.79 | 1,001.54 | 501.27 | 1,000.56 | 500.78 | S   | 894.57   | 447.79 | 877.54   | 439.27 | 876.55   | 438.78 | 5     |
| 9  | 1,165.64 | 583.32 | 1,148.61 | 574.81 | 1,147.63 | 574.32 | F   | 807.53   | 404.27 | 790.51   | 395.76 |          |        | 4     |
| 10 | 1,437.83 | 719.42 | 1,420.81 | 710.91 | 1,419.82 | 710.42 | K   | 660.46   | 330.74 | 643.44   | 322.22 |          |        | 3     |
| 11 | 1,534.89 | 767.95 | 1,517.86 | 759.43 | 1,516.88 | 758.94 | P   | 388.27   | 194.64 | 371.24   | 186.12 |          |        | 2     |
| 12 |          |        |          |        |          |        | K   | 291.21   | 146.11 | 274.19   | 137.60 |          |        | 1     |

Query 64308 Hit 1

MS/MS Fragmentation of **LLVFATDDGFFHFAGDGK**

Found in **sp|P05107|ITB2\_HUMAN**, Integrin beta-2 OS=Homo sapiens GN=ITGB2 PE=1 SV=2

Match to Query 64308: 2097.082from(700.0344,3+)

Title: 863: Sum of 3 scans in range 1906 (rt=52.3906, f=3, i=297) to 1908 (rt=52.4414, f=4, i=574)

[D:\lab212\membrane\GraceJoyce\iTRAQ\_37\_2.raw]

Data File:Submitted from 20120508-1(merge) by Mascot Daemon on JOYCE-VAIO

Monoisotopic mass of neutral peptide Mr(calc): 2097.082

Variable modifications:

K17 iTRAQ4plex (K)

Ions Score: 48.25 Expect: 0.014

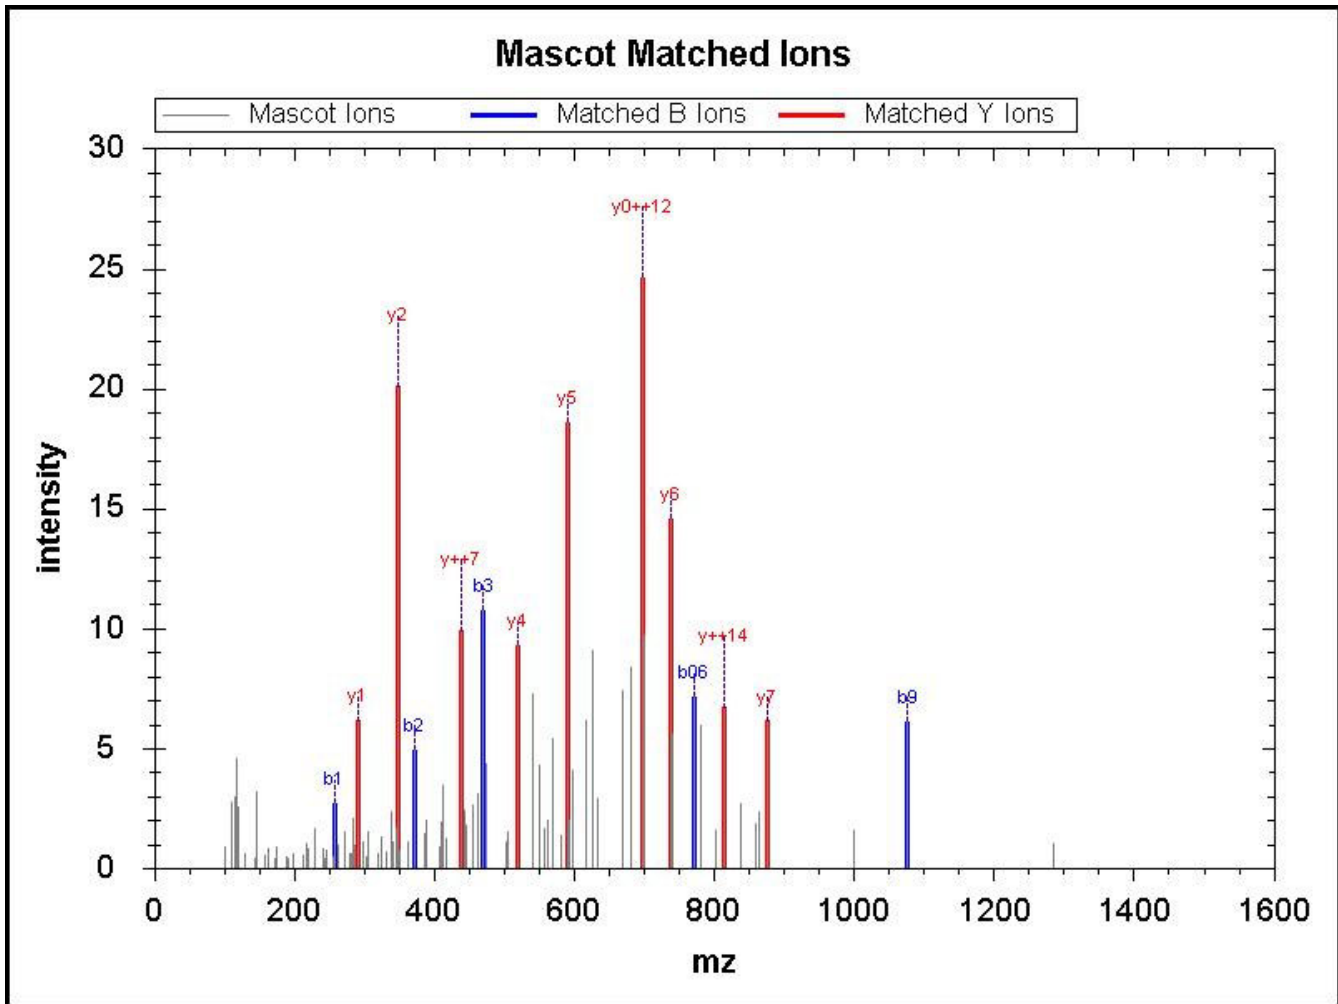

| No | b        | b++    | b0       | b0++   | Seq | y        | y++    | y*       | y*++   | y0       | y0++   | RevNo |
|----|----------|--------|----------|--------|-----|----------|--------|----------|--------|----------|--------|-------|
| 1  | 258.19   | 129.60 |          |        | L   |          |        |          |        |          |        | 17    |
| 2  | 371.28   | 186.14 |          |        | L   | 1,840.90 | 920.95 | 1,823.87 | 912.44 | 1,822.89 | 911.95 | 16    |
| 3  | 470.35   | 235.68 |          |        | V   | 1,727.81 | 864.41 | 1,710.79 | 855.90 | 1,709.80 | 855.41 | 15    |
| 4  | 617.41   | 309.21 |          |        | F   | 1,628.75 | 814.88 | 1,611.72 | 806.36 | 1,610.74 | 805.87 | 14    |
| 5  | 688.45   | 344.73 |          |        | A   | 1,481.68 | 741.34 | 1,464.65 | 732.83 | 1,463.67 | 732.34 | 13    |
| 6  | 789.50   | 395.25 | 771.49   | 386.25 | T   | 1,410.64 | 705.82 | 1,393.61 | 697.31 | 1,392.63 | 696.82 | 12    |
| 7  | 904.53   | 452.77 | 886.52   | 443.76 | D   | 1,309.59 | 655.30 | 1,292.57 | 646.79 | 1,291.58 | 646.29 | 11    |
| 8  | 1,019.55 | 510.28 | 1,001.54 | 501.27 | D   | 1,194.57 | 597.79 | 1,177.54 | 589.27 | 1,176.56 | 588.78 | 10    |
| 9  | 1,076.57 | 538.79 | 1,058.56 | 529.79 | G   | 1,079.54 | 540.27 | 1,062.51 | 531.76 | 1,061.53 | 531.27 | 9     |
| 10 | 1,223.64 | 612.33 | 1,205.63 | 603.32 | F   | 1,022.52 | 511.76 | 1,005.49 | 503.25 | 1,004.51 | 502.76 | 8     |
| 11 | 1,360.70 | 680.85 | 1,342.69 | 671.85 | H   | 875.45   | 438.23 | 858.42   | 429.71 | 857.44   | 429.22 | 7     |
| 12 | 1,507.77 | 754.39 | 1,489.76 | 745.38 | F   | 738.39   | 369.70 | 721.36   | 361.19 | 720.38   | 360.69 | 6     |
| 13 | 1,578.81 | 789.91 | 1,560.80 | 780.90 | A   | 591.32   | 296.16 | 574.30   | 287.65 | 573.31   | 287.16 | 5     |
| 14 | 1,635.83 | 818.42 | 1,617.82 | 809.41 | G   | 520.28   | 260.65 | 503.26   | 252.13 | 502.27   | 251.64 | 4     |

|    |          |        |          |        |   |        |        |        |        |        |        |   |
|----|----------|--------|----------|--------|---|--------|--------|--------|--------|--------|--------|---|
| 15 | 1,750.86 | 875.93 | 1,732.85 | 866.93 | D | 463.26 | 232.14 | 446.24 | 223.62 | 445.25 | 223.13 | 3 |
| 16 | 1,807.88 | 904.44 | 1,789.87 | 895.44 | G | 348.24 | 174.62 | 331.21 | 166.11 |        |        | 2 |
| 17 |          |        |          |        | K | 291.21 | 146.11 | 274.19 | 137.60 |        |        | 1 |

Query 7405 Hit 1

MS/MS Fragmentation of **EGNPYK**

Found in **sp|Q9NZJ4|SACS\_HUMAN**, Sacsin OS=Homo sapiens GN=SACS PE=1 SV=2

Match to Query 7405: 995.5349 from (498.7747, 2+)

Title: 267: Sum of 2 scans in range 848 (rt=27.5637, f=4, i=171) to 849 (rt=27.5892, f=4, i=172)

[D:\lab212\membrane\Grace\Joyce\iTRAQ\_34\_1.raw]

Data File: Submitted from 20120508-1 (merge) by Mascot Daemon on JOYCE-VAIO

Monoisotopic mass of neutral peptide Mr(calc): 995.5349

Variable modifications:

N3 :Deamidated (NQ)

K6 :iTRAQ4plex (K)

Ions Score: 48.19 Expect: 0.009

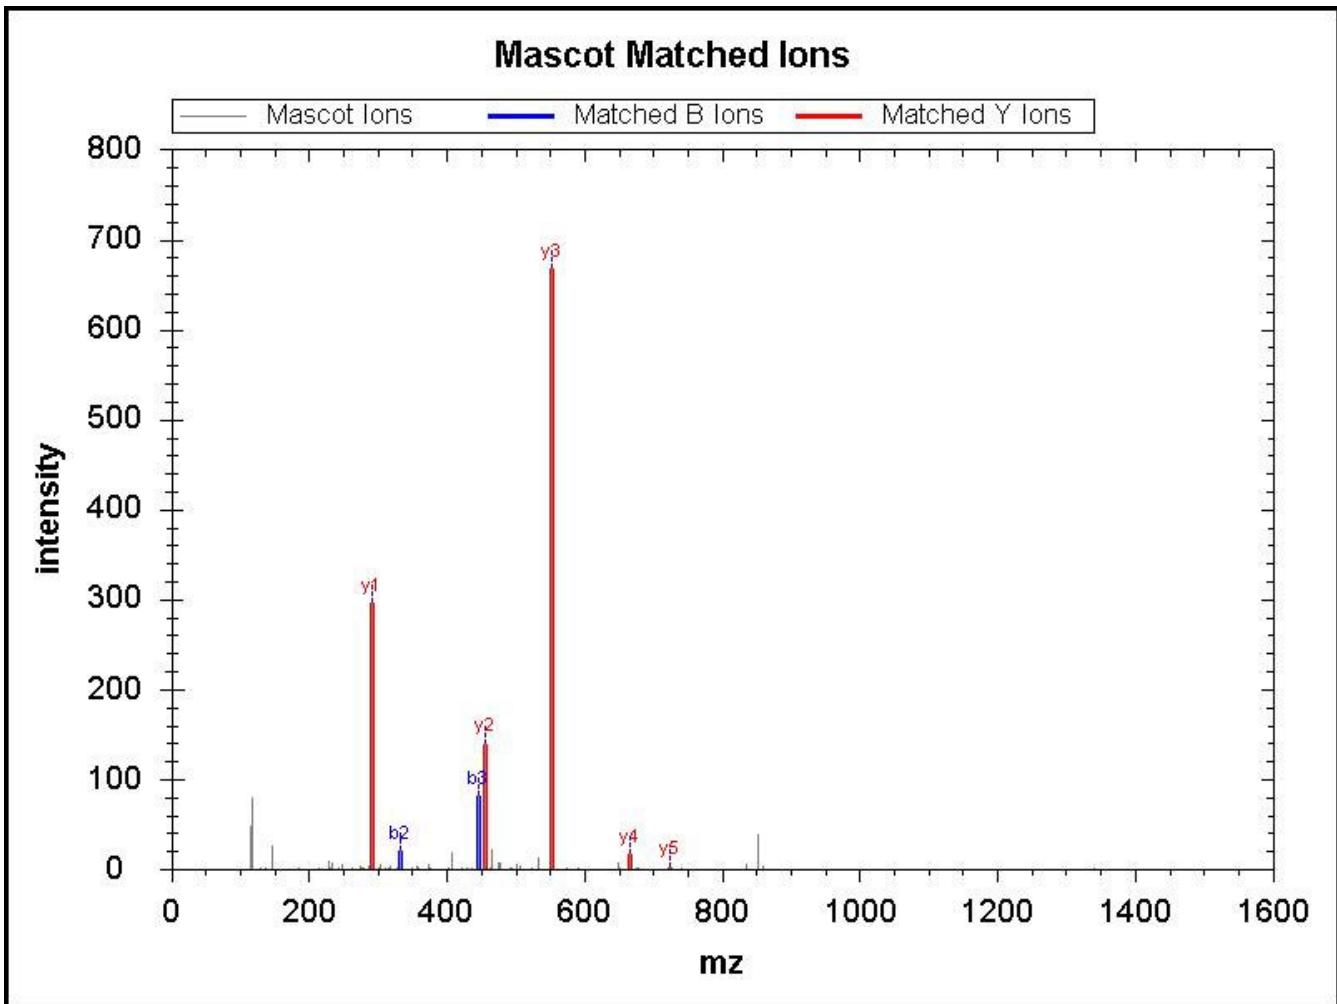

| No | b      | b++    | b*     | b*++   | b0     | b0++   | Seq | y      | y++    | y*     | y*++   | RevNo |
|----|--------|--------|--------|--------|--------|--------|-----|--------|--------|--------|--------|-------|
| 1  | 274.15 | 137.58 |        |        | 256.14 | 128.57 | E   |        |        |        |        | 6     |
| 2  | 331.17 | 166.09 |        |        | 313.16 | 157.09 | G   | 723.38 | 362.19 | 706.35 | 353.68 | 5     |
| 3  | 446.20 | 223.60 | 429.17 | 215.09 | 428.19 | 214.60 | N   | 666.36 | 333.68 | 649.33 | 325.17 | 4     |
| 4  | 543.25 | 272.13 | 526.23 | 263.62 | 525.24 | 263.12 | P   | 551.33 | 276.17 | 534.30 | 267.66 | 3     |
| 5  | 706.32 | 353.66 | 689.29 | 345.15 | 688.31 | 344.66 | Y   | 454.28 | 227.64 | 437.25 | 219.13 | 2     |
| 6  |        |        |        |        |        |        | K   | 291.21 | 146.11 | 274.19 | 137.60 | 1     |

Query 93590 Hit 1

MS/MS Fragmentation of **KQDTTSTIISIASNVAGHPLVWDFVR**

Found in **sp|P97449|AMPN\_MOUSE**, Aminopeptidase N OS=Mus musculus GN=Anpep PE=1 SV=4

Match to Query 93590: 3142.697from(786.6815,4+)

Title: 866: Scan 2495 (rt=63.6754, f=2, i=436) [D:\lab212\membrane\Grace\Joyce\iTRAQ\_46\_1.raw]

Data File: Submitted from 20120508-1(merge) by Mascot Daemon on JOYCE-VAIO

Monoisotopic mass of neutral peptide Mr(calc): 3142.697

Variable modifications:

K1 iTRAQ4plex (K)

Ions Score: 48.16 Expect: 0.008

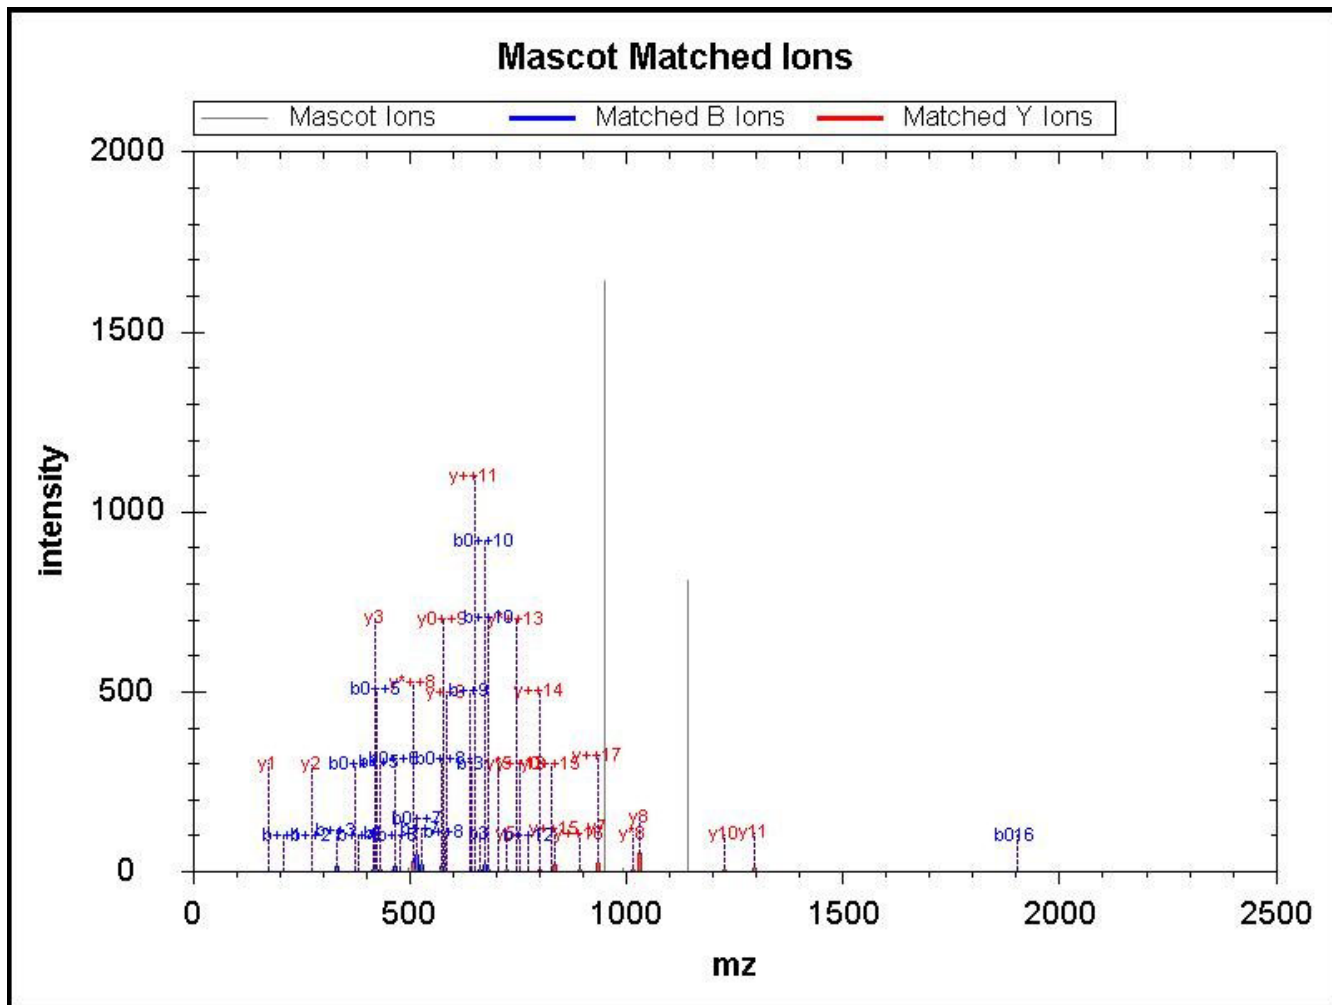

|    |          |          |          |          |          |          |   |          |        |          |        |          |        |   |
|----|----------|----------|----------|----------|----------|----------|---|----------|--------|----------|--------|----------|--------|---|
| 19 | 2,210.20 | 1,105.60 | 2,193.18 | 1,097.09 | 2,192.19 | 1,096.60 | P | 1,031.57 | 516.29 | 1,014.54 | 507.77 | 1,013.56 | 507.28 | 8 |
| 20 | 2,323.29 | 1,162.15 | 2,306.26 | 1,153.63 | 2,305.28 | 1,153.14 | L | 934.51   | 467.76 | 917.49   | 459.25 | 916.50   | 458.76 | 7 |
| 21 | 2,422.35 | 1,211.68 | 2,405.33 | 1,203.17 | 2,404.34 | 1,202.68 | V | 821.43   | 411.22 | 804.40   | 402.71 | 803.42   | 402.21 | 6 |
| 22 | 2,608.43 | 1,304.72 | 2,591.41 | 1,296.21 | 2,590.42 | 1,295.72 | W | 722.36   | 361.68 | 705.34   | 353.17 | 704.35   | 352.68 | 5 |
| 23 | 2,723.46 | 1,362.23 | 2,706.43 | 1,353.72 | 2,705.45 | 1,353.23 | D | 536.28   | 268.64 | 519.26   | 260.13 | 518.27   | 259.64 | 4 |
| 24 | 2,870.53 | 1,435.77 | 2,853.50 | 1,427.25 | 2,852.52 | 1,426.76 | F | 421.26   | 211.13 | 404.23   | 202.62 |          |        | 3 |
| 25 | 2,969.60 | 1,485.30 | 2,952.57 | 1,476.79 | 2,951.59 | 1,476.30 | V | 274.19   | 137.60 | 257.16   | 129.08 |          |        | 2 |
| 26 |          |          |          |          |          |          | R | 175.12   | 88.06  | 158.09   | 79.55  |          |        | 1 |

Query 6620 Hit 1

MS/MS Fragmentation of **LLELDALR**

Found in **sp|Q9ULX9|MAFF\_HUMAN**, Transcription factor MafF OS=Homo sapiens GN=MAFF PE=1 SV=2

Match to Query 6620: 972.6013 from (487.3079, 2+)

Title: 290: Sum of 2 scans in range 1384 (rt=37.0885, f=4, i=171) to 1385 (rt=37.1138, f=4, i=172)

[D:\lab212\membrane\GraceJoyce\iTRAQ\_26\_1.raw]

Data File: Submitted from 20120508-1(merge) by Mascot Daemon on JOYCE-VAIO

Monoisotopic mass of neutral peptide Mr(calc): 972.6013

Variable modifications:

Ions Score: 47.99 Expect: 0.009

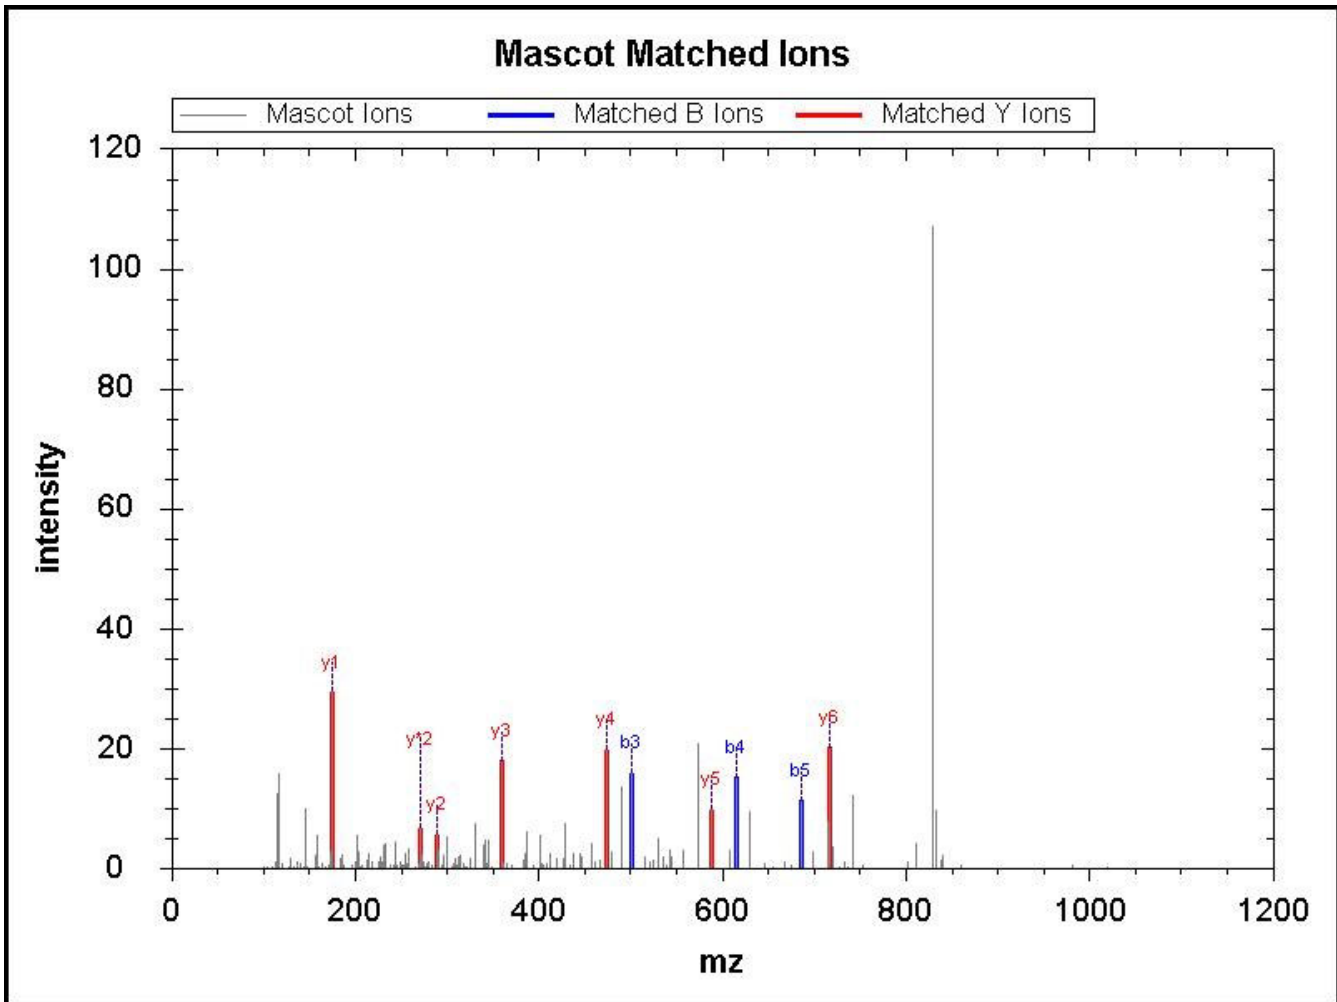

| No | b      | b++    | b0     | b0++   | Seq | y      | y++    | y*     | y*++   | y0     | y0++   | RevNo |
|----|--------|--------|--------|--------|-----|--------|--------|--------|--------|--------|--------|-------|
| 1  | 258.19 | 129.60 |        |        | L   |        |        |        |        |        |        | 7     |
| 2  | 387.24 | 194.12 | 369.23 | 185.12 | E   | 716.39 | 358.70 | 699.37 | 350.19 | 698.38 | 349.70 | 6     |
| 3  | 500.32 | 250.66 | 482.31 | 241.66 | L   | 587.35 | 294.18 | 570.32 | 285.67 | 569.34 | 285.17 | 5     |
| 4  | 615.35 | 308.18 | 597.34 | 299.17 | D   | 474.27 | 237.64 | 457.24 | 229.12 | 456.26 | 228.63 | 4     |
| 5  | 686.38 | 343.70 | 668.37 | 334.69 | A   | 359.24 | 180.12 | 342.21 | 171.61 |        |        | 3     |
| 6  | 799.47 | 400.24 | 781.46 | 391.23 | L   | 288.20 | 144.61 | 271.18 | 136.09 |        |        | 2     |



|   |  |  |  |   |        |       |        |       |  |  |   |
|---|--|--|--|---|--------|-------|--------|-------|--|--|---|
| 7 |  |  |  | R | 175.12 | 88.06 | 158.09 | 79.55 |  |  | 1 |
|---|--|--|--|---|--------|-------|--------|-------|--|--|---|

Query 55792 Hit 1

MS/MS Fragmentation of **STLVHSLFLTDLYK**

Found in **sp|Q99719|SEPT5\_HUMAN**, Septin-5 OS=Homo sapiens GN=SEPT5 PE=1 SV=1

Match to Query 55792: 1924.092from(642.3713,3+)

Title: 850: Scan 1894 (rt=52.1693, f=2, i=311) [D:\lab212\membrane\Grace\Joyce\iTRAQ\_39\_1.raw]

Data File:Submitted from 20120508-1(merge) by Mascot Daemon on JOYCE-VAIO

Monoisotopic mass of neutral peptide Mr(calc): 1924.092

Variable modifications:

K14 :iTRAQ4plex (K)

Ions Score: 47.97 Expect: 0.009

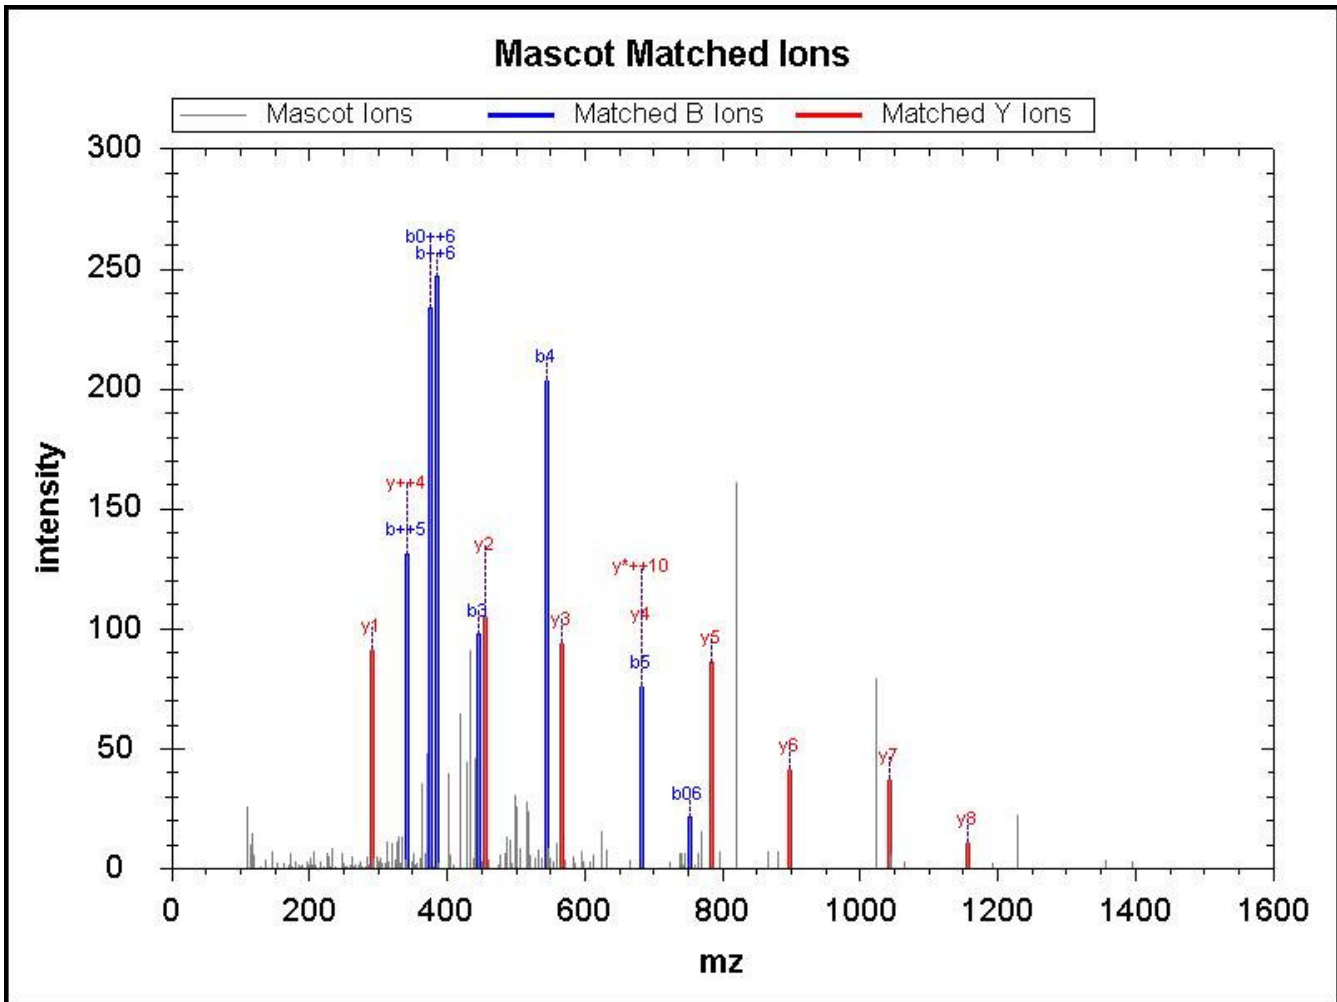

| No | b        | b++    | b0       | b0++   | Seq | y        | y++    | y*       | y*++   | y0       | y0++   | RevNo |
|----|----------|--------|----------|--------|-----|----------|--------|----------|--------|----------|--------|-------|
| 1  | 232.14   | 116.57 | 214.13   | 107.57 | S   |          |        |          |        |          |        | 14    |
| 2  | 333.19   | 167.10 | 315.18   | 158.09 | T   | 1,693.96 | 847.49 | 1,676.94 | 838.97 | 1,675.95 | 838.48 | 13    |
| 3  | 446.27   | 223.64 | 428.26   | 214.63 | L   | 1,592.92 | 796.96 | 1,575.89 | 788.45 | 1,574.91 | 787.96 | 12    |
| 4  | 545.34   | 273.17 | 527.33   | 264.17 | V   | 1,479.83 | 740.42 | 1,462.81 | 731.91 | 1,461.82 | 731.41 | 11    |
| 5  | 682.40   | 341.70 | 664.39   | 332.70 | H   | 1,380.76 | 690.89 | 1,363.74 | 682.37 | 1,362.75 | 681.88 | 10    |
| 6  | 769.43   | 385.22 | 751.42   | 376.21 | S   | 1,243.71 | 622.36 | 1,226.68 | 613.84 | 1,225.69 | 613.35 | 9     |
| 7  | 882.52   | 441.76 | 864.51   | 432.76 | L   | 1,156.67 | 578.84 | 1,139.65 | 570.33 | 1,138.66 | 569.84 | 8     |
| 8  | 1,029.58 | 515.30 | 1,011.57 | 506.29 | F   | 1,043.59 | 522.30 | 1,026.56 | 513.79 | 1,025.58 | 513.29 | 7     |
| 9  | 1,142.67 | 571.84 | 1,124.66 | 562.83 | L   | 896.52   | 448.76 | 879.49   | 440.25 | 878.51   | 439.76 | 6     |
| 10 | 1,243.72 | 622.36 | 1,225.71 | 613.36 | T   | 783.44   | 392.22 | 766.41   | 383.71 | 765.43   | 383.22 | 5     |
| 11 | 1,358.74 | 679.88 | 1,340.73 | 670.87 | D   | 682.39   | 341.70 | 665.36   | 333.18 | 664.38   | 332.69 | 4     |
| 12 | 1,471.83 | 736.42 | 1,453.82 | 727.41 | L   | 567.36   | 284.18 | 550.34   | 275.67 |          |        | 3     |

|    |          |        |          |        |   |        |        |        |        |  |  |   |
|----|----------|--------|----------|--------|---|--------|--------|--------|--------|--|--|---|
| 13 | 1,634.89 | 817.95 | 1,616.88 | 808.94 | Y | 454.28 | 227.64 | 437.25 | 219.13 |  |  | 2 |
| 14 |          |        |          |        | K | 291.21 | 146.11 | 274.19 | 137.60 |  |  | 1 |

Query 76132 Hit 1

MS/MS Fragmentation of **FTDDTFDPELAATIGVDFK**

Found in **sp|Q9NP72|RAB18\_HUMAN**, Ras-related protein Rab-18 OS=Homo sapiens GN=RAB18 PE=1 SV=1

Match to Query 76132: 2389.193from(797.4051,3+)

Title: 959: Sum of 2 scans in range 2240 (rt=59.2722, f=4, i=625) to 2241 (rt=59.2976, f=4, i=626)

[D:\lab212\membrane\Grace\Joyce\iTRAQ\_24\_1.raw]

Data File: Submitted from 20120508-1(merge) by Mascot Daemon on JOYCE-VAIO

Monoisotopic mass of neutral peptide Mr(calc): 2389.193

Variable modifications:

K19 iTRAQ4plex (K)

Ions Score: 47.95 Expect: 0.016

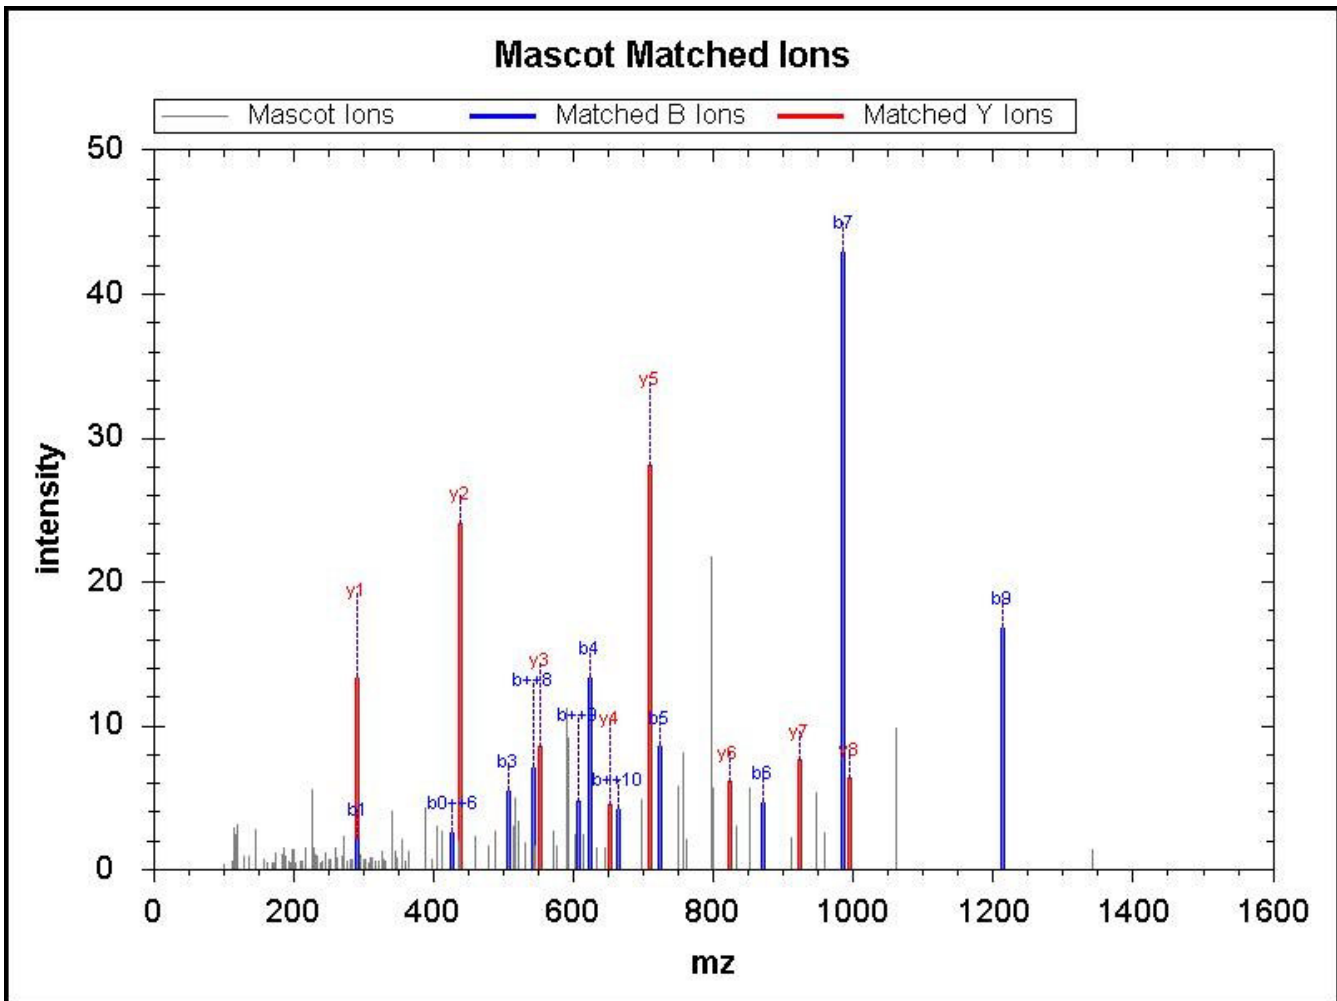

| No | b        | b++    | b0       | b0++   | Seq | y        | y++      | y*       | y*++     | y0       | y0++     | RevNo |
|----|----------|--------|----------|--------|-----|----------|----------|----------|----------|----------|----------|-------|
| 1  | 292.18   | 146.59 |          |        | F   |          |          |          |          |          |          | 19    |
| 2  | 393.23   | 197.12 | 375.21   | 188.11 | T   | 2,099.03 | 1,050.02 | 2,082.00 | 1,041.51 | 2,081.02 | 1,041.01 | 18    |
| 3  | 508.25   | 254.63 | 490.24   | 245.62 | D   | 1,997.98 | 999.49   | 1,980.96 | 990.98   | 1,979.97 | 990.49   | 17    |
| 4  | 623.28   | 312.14 | 605.27   | 303.14 | D   | 1,882.96 | 941.98   | 1,865.93 | 933.47   | 1,864.94 | 932.98   | 16    |
| 5  | 724.33   | 362.67 | 706.32   | 353.66 | T   | 1,767.93 | 884.47   | 1,750.90 | 875.95   | 1,749.92 | 875.46   | 15    |
| 6  | 871.40   | 436.20 | 853.38   | 427.20 | F   | 1,666.88 | 833.94   | 1,649.85 | 825.43   | 1,648.87 | 824.94   | 14    |
| 7  | 986.42   | 493.71 | 968.41   | 484.71 | D   | 1,519.81 | 760.41   | 1,502.79 | 751.90   | 1,501.80 | 751.40   | 13    |
| 8  | 1,083.48 | 542.24 | 1,065.46 | 533.24 | P   | 1,404.79 | 702.90   | 1,387.76 | 694.38   | 1,386.77 | 693.89   | 12    |
| 9  | 1,212.52 | 606.76 | 1,194.51 | 597.76 | E   | 1,307.73 | 654.37   | 1,290.71 | 645.86   | 1,289.72 | 645.36   | 11    |
| 10 | 1,325.60 | 663.30 | 1,307.59 | 654.30 | L   | 1,178.69 | 589.85   | 1,161.66 | 581.34   | 1,160.68 | 580.84   | 10    |
| 11 | 1,396.64 | 698.82 | 1,378.63 | 689.82 | A   | 1,065.61 | 533.31   | 1,048.58 | 524.79   | 1,047.60 | 524.30   | 9     |

|    |          |          |          |          |   |        |        |        |        |        |        |   |
|----|----------|----------|----------|----------|---|--------|--------|--------|--------|--------|--------|---|
| 12 | 1,467.68 | 734.34   | 1,449.67 | 725.34   | A | 994.57 | 497.79 | 977.54 | 489.27 | 976.56 | 488.78 | 8 |
| 13 | 1,568.72 | 784.87   | 1,550.71 | 775.86   | T | 923.53 | 462.27 | 906.51 | 453.76 | 905.52 | 453.26 | 7 |
| 14 | 1,681.81 | 841.41   | 1,663.80 | 832.40   | I | 822.48 | 411.75 | 805.46 | 403.23 | 804.47 | 402.74 | 6 |
| 15 | 1,738.83 | 869.92   | 1,720.82 | 860.91   | G | 709.40 | 355.20 | 692.37 | 346.69 | 691.39 | 346.20 | 5 |
| 16 | 1,837.90 | 919.45   | 1,819.89 | 910.45   | V | 652.38 | 326.69 | 635.35 | 318.18 | 634.37 | 317.69 | 4 |
| 17 | 1,952.92 | 976.97   | 1,934.91 | 967.96   | D | 553.31 | 277.16 | 536.28 | 268.65 | 535.30 | 268.15 | 3 |
| 18 | 2,099.99 | 1,050.50 | 2,081.98 | 1,041.49 | F | 438.28 | 219.65 | 421.26 | 211.13 |        |        | 2 |
| 19 |          |          |          |          | K | 291.21 | 146.11 | 274.19 | 137.60 |        |        | 1 |

Query 98108 Hit 1

MS/MS Fragmentation of **LNLQSVTEQSSLDDFLATAELAGTEFVAEK**

Found in **sp|Q9H089|LSG1\_HUMAN**, Large subunit GTPase 1 homolog OS=Homo sapiens GN=LSG1 PE=1 SV=2  
Match to Query 98108: 3513.79 from (879.4548, 4+)

Title: 1283: Sum of 2 scans in range 2999 (rt=75.9602, f=4, i=849) to 3000 (rt=75.9856, f=4, i=850)

[D:\lab212\membrane\Grace\Joyce\iTRAQ\_23\_2.raw]

Data File: Submitted from 20120508-1(merge) by Mascot Daemon on JOYCE-VAIO

Monoisotopic mass of neutral peptide Mr(calc): 3513.79

Variable modifications:

K30 iTRAQ4plex (K)

Ions Score: 47.94 Expect: 0.013

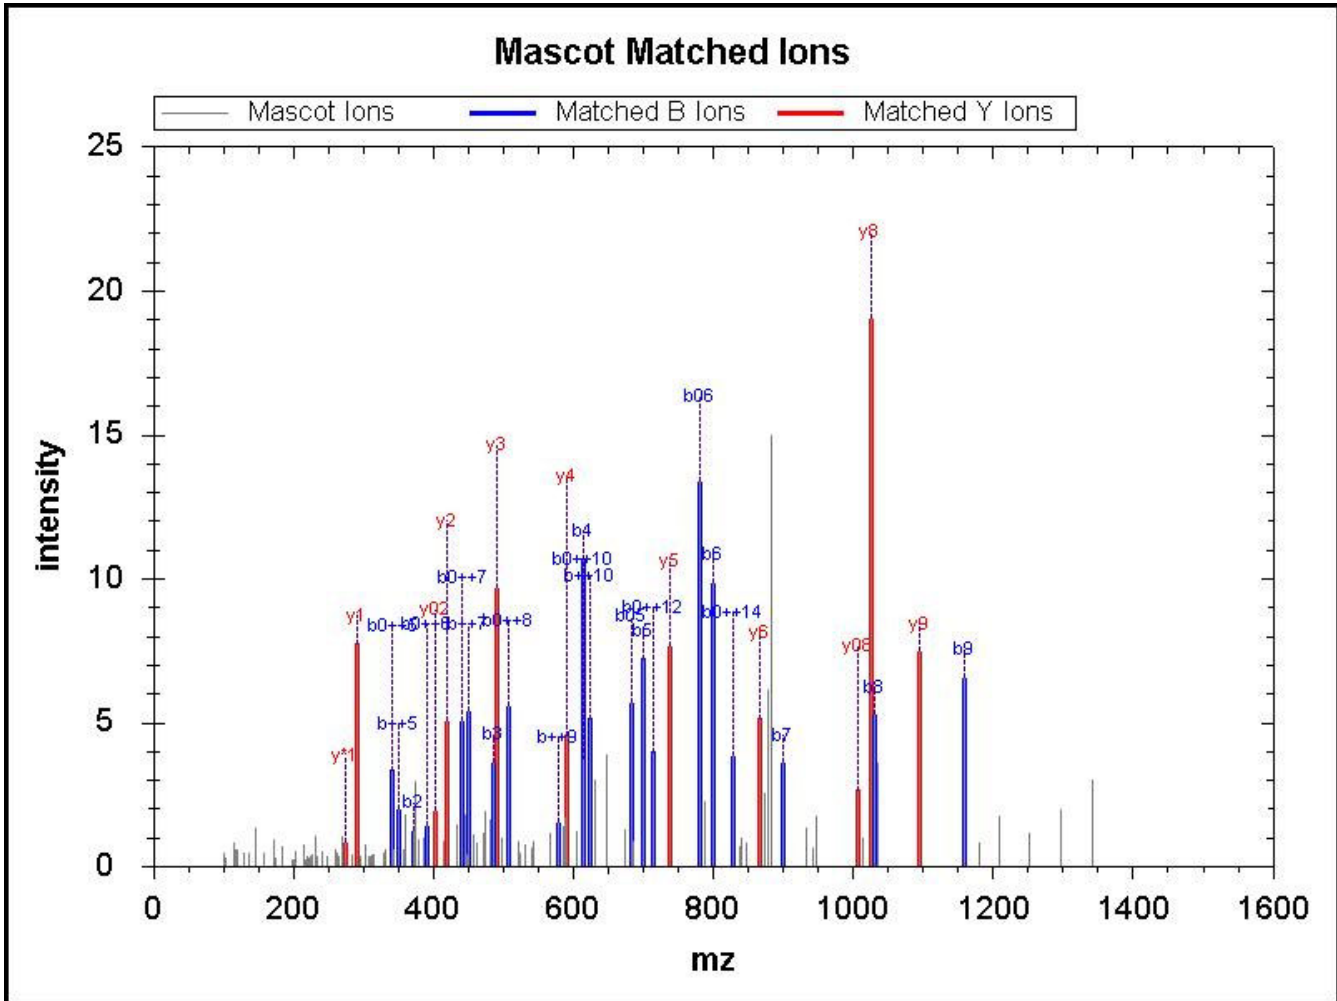

| No | b      | b++    | b*     | b*++   | b0     | b0++   | Seq | y        | y++      | y*       | y*++     | y0       | y0++     | RevNo |
|----|--------|--------|--------|--------|--------|--------|-----|----------|----------|----------|----------|----------|----------|-------|
| 1  | 258.19 | 129.60 |        |        |        |        | L   |          |          |          |          |          |          | 30    |
| 2  | 372.24 | 186.62 | 355.21 | 178.11 |        |        | N   | 3,257.62 | 1,629.31 | 3,240.59 | 1,620.80 | 3,239.61 | 1,620.31 | 29    |
| 3  | 485.32 | 243.16 | 468.29 | 234.65 |        |        | L   | 3,143.57 | 1,572.29 | 3,126.55 | 1,563.78 | 3,125.56 | 1,563.29 | 28    |
| 4  | 613.38 | 307.19 | 596.35 | 298.68 |        |        | Q   | 3,030.49 | 1,515.75 | 3,013.46 | 1,507.24 | 3,012.48 | 1,506.74 | 27    |
| 5  | 700.41 | 350.71 | 683.38 | 342.20 | 682.40 | 341.70 | S   | 2,902.43 | 1,451.72 | 2,885.41 | 1,443.21 | 2,884.42 | 1,442.71 | 26    |

|    |          |          |          |          |          |          |   |          |          |          |          |          |          |    |
|----|----------|----------|----------|----------|----------|----------|---|----------|----------|----------|----------|----------|----------|----|
| 6  | 799.48   | 400.24   | 782.45   | 391.73   | 781.47   | 391.24   | V | 2,815.40 | 1,408.20 | 2,798.37 | 1,399.69 | 2,797.39 | 1,399.20 | 25 |
| 7  | 900.53   | 450.77   | 883.50   | 442.25   | 882.52   | 441.76   | T | 2,716.33 | 1,358.67 | 2,699.31 | 1,350.16 | 2,698.32 | 1,349.66 | 24 |
| 8  | 1,029.57 | 515.29   | 1,012.54 | 506.78   | 1,011.56 | 506.28   | E | 2,615.28 | 1,308.15 | 2,598.26 | 1,299.63 | 2,597.27 | 1,299.14 | 23 |
| 9  | 1,157.63 | 579.32   | 1,140.60 | 570.80   | 1,139.62 | 570.31   | Q | 2,486.24 | 1,243.62 | 2,469.22 | 1,235.11 | 2,468.23 | 1,234.62 | 22 |
| 10 | 1,244.66 | 622.83   | 1,227.63 | 614.32   | 1,226.65 | 613.83   | S | 2,358.18 | 1,179.60 | 2,341.16 | 1,171.08 | 2,340.17 | 1,170.59 | 21 |
| 11 | 1,331.69 | 666.35   | 1,314.67 | 657.84   | 1,313.68 | 657.34   | S | 2,271.15 | 1,136.08 | 2,254.12 | 1,127.57 | 2,253.14 | 1,127.07 | 20 |
| 12 | 1,444.78 | 722.89   | 1,427.75 | 714.38   | 1,426.77 | 713.89   | L | 2,184.12 | 1,092.56 | 2,167.09 | 1,084.05 | 2,166.11 | 1,083.56 | 19 |
| 13 | 1,559.80 | 780.41   | 1,542.78 | 771.89   | 1,541.79 | 771.40   | D | 2,071.04 | 1,036.02 | 2,054.01 | 1,027.51 | 2,053.02 | 1,027.02 | 18 |
| 14 | 1,674.83 | 837.92   | 1,657.80 | 829.41   | 1,656.82 | 828.91   | D | 1,956.01 | 978.51   | 1,938.98 | 969.99   | 1,938.00 | 969.50   | 17 |
| 15 | 1,821.90 | 911.45   | 1,804.87 | 902.94   | 1,803.89 | 902.45   | F | 1,840.98 | 920.99   | 1,823.95 | 912.48   | 1,822.97 | 911.99   | 16 |
| 16 | 1,934.98 | 968.00   | 1,917.96 | 959.48   | 1,916.97 | 958.99   | L | 1,693.91 | 847.46   | 1,676.89 | 838.95   | 1,675.90 | 838.45   | 15 |
| 17 | 2,006.02 | 1,003.51 | 1,988.99 | 995.00   | 1,988.01 | 994.51   | A | 1,580.83 | 790.92   | 1,563.80 | 782.40   | 1,562.82 | 781.91   | 14 |
| 18 | 2,107.07 | 1,054.04 | 2,090.04 | 1,045.52 | 2,089.06 | 1,045.03 | T | 1,509.79 | 755.40   | 1,492.77 | 746.89   | 1,491.78 | 746.39   | 13 |
| 19 | 2,178.10 | 1,089.56 | 2,161.08 | 1,081.04 | 2,160.09 | 1,080.55 | A | 1,408.74 | 704.88   | 1,391.72 | 696.36   | 1,390.73 | 695.87   | 12 |
| 20 | 2,307.15 | 1,154.08 | 2,290.12 | 1,145.56 | 2,289.14 | 1,145.07 | E | 1,337.71 | 669.36   | 1,320.68 | 660.84   | 1,319.70 | 660.35   | 11 |
| 21 | 2,420.23 | 1,210.62 | 2,403.20 | 1,202.11 | 2,402.22 | 1,201.61 | L | 1,208.66 | 604.84   | 1,191.64 | 596.32   | 1,190.65 | 595.83   | 10 |
| 22 | 2,491.27 | 1,246.14 | 2,474.24 | 1,237.62 | 2,473.26 | 1,237.13 | A | 1,095.58 | 548.29   | 1,078.55 | 539.78   | 1,077.57 | 539.29   | 9  |
| 23 | 2,548.29 | 1,274.65 | 2,531.26 | 1,266.14 | 2,530.28 | 1,265.64 | G | 1,024.54 | 512.78   | 1,007.52 | 504.26   | 1,006.53 | 503.77   | 8  |
| 24 | 2,649.34 | 1,325.17 | 2,632.31 | 1,316.66 | 2,631.33 | 1,316.17 | T | 967.52   | 484.26   | 950.50   | 475.75   | 949.51   | 475.26   | 7  |
| 25 | 2,778.38 | 1,389.69 | 2,761.35 | 1,381.18 | 2,760.37 | 1,380.69 | E | 866.47   | 433.74   | 849.45   | 425.23   | 848.46   | 424.74   | 6  |
| 26 | 2,925.45 | 1,463.23 | 2,908.42 | 1,454.71 | 2,907.44 | 1,454.22 | F | 737.43   | 369.22   | 720.40   | 360.71   | 719.42   | 360.21   | 5  |
| 27 | 3,024.52 | 1,512.76 | 3,007.49 | 1,504.25 | 3,006.51 | 1,503.76 | V | 590.36   | 295.69   | 573.34   | 287.17   | 572.35   | 286.68   | 4  |
| 28 | 3,095.55 | 1,548.28 | 3,078.53 | 1,539.77 | 3,077.54 | 1,539.28 | A | 491.29   | 246.15   | 474.27   | 237.64   | 473.28   | 237.15   | 3  |
| 29 | 3,224.60 | 1,612.80 | 3,207.57 | 1,604.29 | 3,206.59 | 1,603.80 | E | 420.26   | 210.63   | 403.23   | 202.12   | 402.25   | 201.63   | 2  |
| 30 |          |          |          |          |          |          | K | 291.21   | 146.11   | 274.19   | 137.60   |          |          | 1  |

Query 43237 Hit 1

MS/MS Fragmentation of **EVTPVSSIPVETHR**

Found in **sp|Q9HD20|AT131\_HUMAN**, Probable cation-transporting ATPase 13A1 OS=Homo sapiens GN=ATP13A1 PE=1 SV=2

Match to Query 43237: 1693.913from(565.645,3+)

Title: 284: Sum of 2 scans in range 886 (rt=28.4176, f=4, i=183) to 887 (rt=28.4431, f=4, i=184)

[D:\lab212\membrane\Grace\Joyce\iTRAQ\_34\_1.raw]

Data File: Submitted from 20120508-1(merge) by Mascot Daemon on JOYCE-VAIO

Monoisotopic mass of neutral peptide Mr(calc): 1693.913

Variable modifications:

Ions Score: 47.91 Expect: 0.014

### Mascot Matched Ions

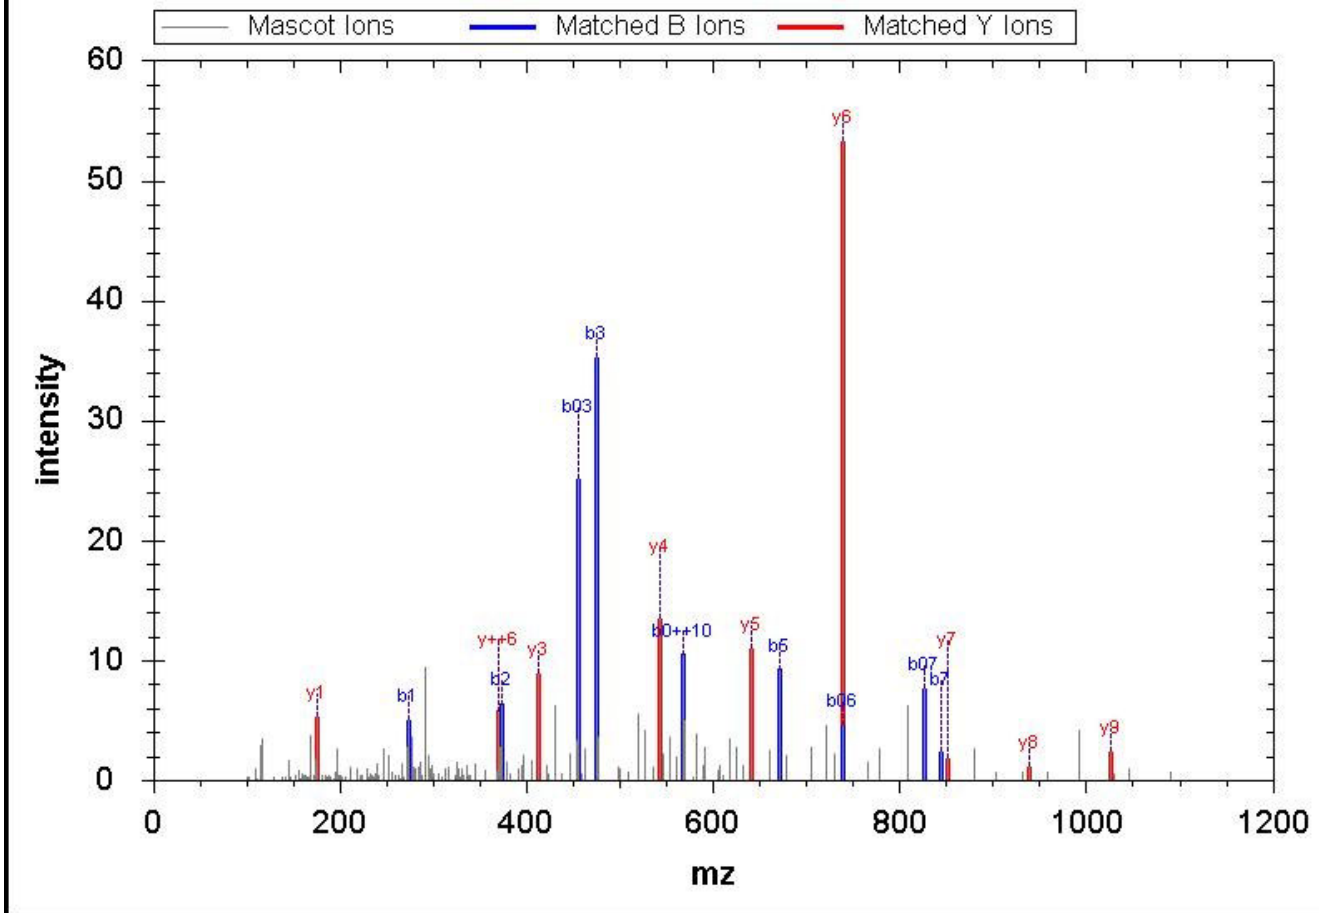

| No | b        | b++    | b0       | b0++   | Seq | y        | y++    | y*       | y*++   | y0       | y0++   | RevNo |
|----|----------|--------|----------|--------|-----|----------|--------|----------|--------|----------|--------|-------|
| 1  | 274.15   | 137.58 | 256.14   | 128.57 | E   |          |        |          |        |          |        | 14    |
| 2  | 373.22   | 187.11 | 355.21   | 178.11 | V   | 1,421.77 | 711.39 | 1,404.75 | 702.88 | 1,403.76 | 702.39 | 13    |
| 3  | 474.27   | 237.64 | 456.26   | 228.63 | T   | 1,322.71 | 661.86 | 1,305.68 | 653.34 | 1,304.70 | 652.85 | 12    |
| 4  | 571.32   | 286.16 | 553.31   | 277.16 | P   | 1,221.66 | 611.33 | 1,204.63 | 602.82 | 1,203.65 | 602.33 | 11    |
| 5  | 670.39   | 335.70 | 652.38   | 326.69 | V   | 1,124.61 | 562.81 | 1,107.58 | 554.29 | 1,106.60 | 553.80 | 10    |
| 6  | 757.42   | 379.21 | 739.41   | 370.21 | S   | 1,025.54 | 513.27 | 1,008.51 | 504.76 | 1,007.53 | 504.27 | 9     |
| 7  | 844.45   | 422.73 | 826.44   | 413.72 | S   | 938.51   | 469.76 | 921.48   | 461.24 | 920.49   | 460.75 | 8     |
| 8  | 957.54   | 479.27 | 939.53   | 470.27 | I   | 851.47   | 426.24 | 834.45   | 417.73 | 833.46   | 417.24 | 7     |
| 9  | 1,054.59 | 527.80 | 1,036.58 | 518.79 | P   | 738.39   | 369.70 | 721.36   | 361.18 | 720.38   | 360.69 | 6     |
| 10 | 1,153.66 | 577.33 | 1,135.65 | 568.33 | V   | 641.34   | 321.17 | 624.31   | 312.66 | 623.33   | 312.17 | 5     |
| 11 | 1,282.70 | 641.85 | 1,264.69 | 632.85 | E   | 542.27   | 271.64 | 525.24   | 263.12 | 524.26   | 262.63 | 4     |
| 12 | 1,383.75 | 692.38 | 1,365.74 | 683.37 | T   | 413.23   | 207.12 | 396.20   | 198.60 | 395.21   | 198.11 | 3     |
| 13 | 1,520.81 | 760.91 | 1,502.80 | 751.90 | H   | 312.18   | 156.59 | 295.15   | 148.08 |          |        | 2     |
| 14 |          |        |          |        | R   | 175.12   | 88.06  | 158.09   | 79.55  |          |        | 1     |

Query 64593 Hit 1

MS/MS Fragmentation of **KFVFFNIPQIQYK**

Found in **sp|P82663|RT25\_HUMAN**, 28S ribosomal protein S25

Match to Query 64593: 2103.223from(702.0817,3+)

Title: 917: Scan 2023 (rt=55.1652, f=3, i=315) [D:\lab212\membrane\Grace\Joyce\iTRAQ\_44\_1.raw]

Data File: Submitted from 20120508-1(merge) by Mascot Daemon on JOYCE-VAIO

Monoisotopic mass of neutral peptide Mr(calc): 2103.223

Variable modifications:

K1 :iTRAQ4plex (K)

K13 :iTRAQ4plex (K)

Ions Score: 47.54 Expect: 0.007



### Mascot Matched Ions

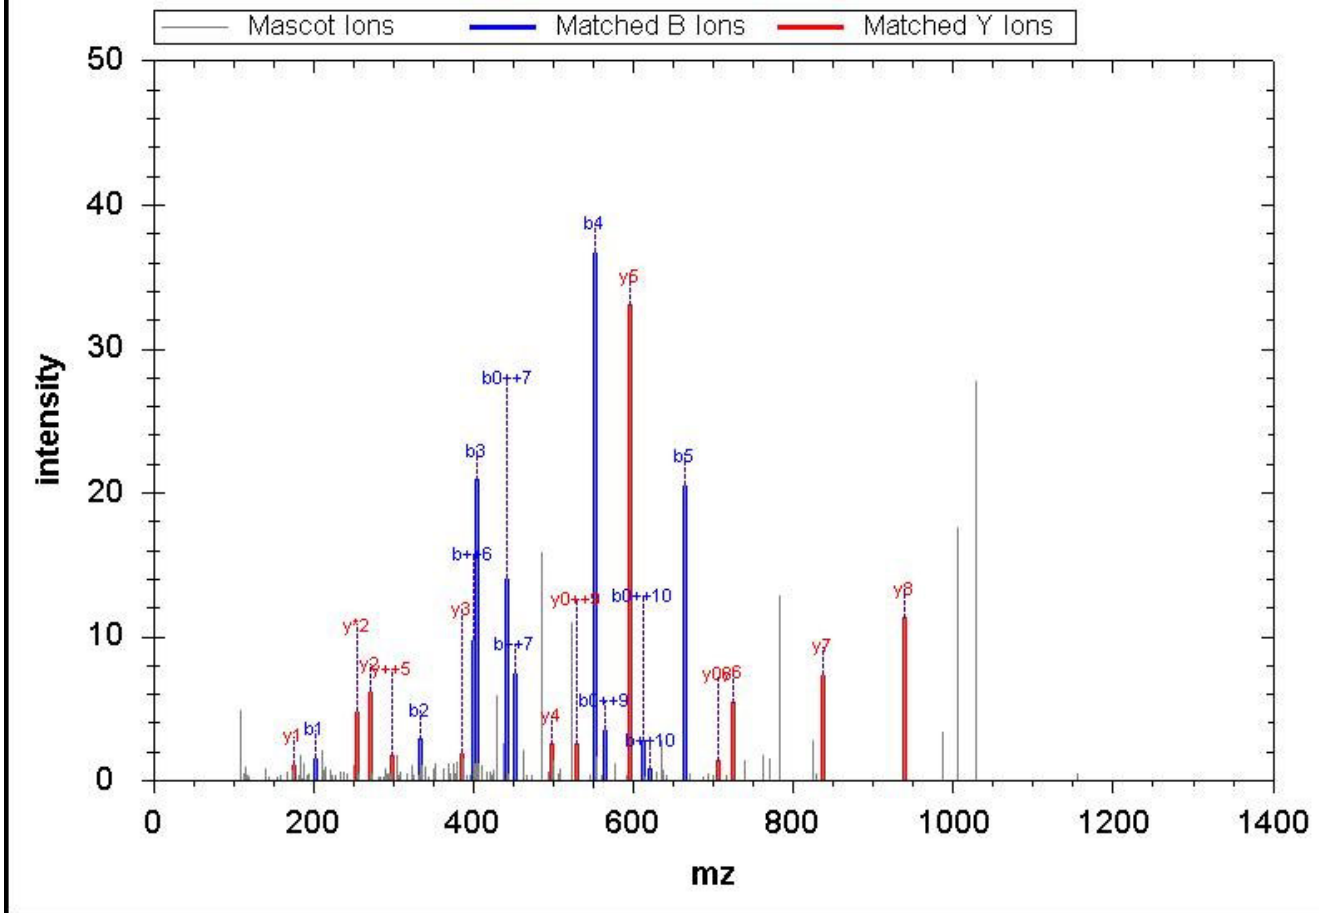

| No | b        | b++    | b0       | b0++   | Seq | y        | y++    | y*       | y*++   | y0       | y0++   | RevNo |
|----|----------|--------|----------|--------|-----|----------|--------|----------|--------|----------|--------|-------|
| 1  | 202.13   | 101.57 |          |        | G   |          |        |          |        |          |        | 14    |
| 2  | 333.17   | 167.09 |          |        | M   | 1,537.86 | 769.43 | 1,520.83 | 760.92 | 1,519.85 | 760.43 | 13    |
| 3  | 404.21   | 202.61 |          |        | A   | 1,406.82 | 703.91 | 1,389.79 | 695.40 | 1,388.80 | 694.91 | 12    |
| 4  | 551.28   | 276.14 |          |        | F   | 1,335.78 | 668.39 | 1,318.75 | 659.88 | 1,317.77 | 659.39 | 11    |
| 5  | 664.36   | 332.68 |          |        | L   | 1,188.71 | 594.86 | 1,171.68 | 586.35 | 1,170.70 | 585.85 | 10    |
| 6  | 801.42   | 401.21 |          |        | H   | 1,075.63 | 538.32 | 1,058.60 | 529.80 | 1,057.62 | 529.31 | 9     |
| 7  | 902.47   | 451.74 | 884.46   | 442.73 | T   | 938.57   | 469.79 | 921.54   | 461.27 | 920.56   | 460.78 | 8     |
| 8  | 1,015.55 | 508.28 | 997.54   | 499.27 | L   | 837.52   | 419.26 | 820.49   | 410.75 | 819.51   | 410.26 | 7     |
| 9  | 1,144.59 | 572.80 | 1,126.58 | 563.80 | E   | 724.44   | 362.72 | 707.41   | 354.21 | 706.42   | 353.72 | 6     |
| 10 | 1,241.65 | 621.33 | 1,223.64 | 612.32 | P   | 595.39   | 298.20 | 578.37   | 289.69 |          |        | 5     |
| 11 | 1,354.73 | 677.87 | 1,336.72 | 668.86 | L   | 498.34   | 249.67 | 481.31   | 241.16 |          |        | 4     |
| 12 | 1,467.82 | 734.41 | 1,449.80 | 725.41 | I   | 385.26   | 193.13 | 368.23   | 184.62 |          |        | 3     |
| 13 | 1,564.87 | 782.94 | 1,546.86 | 773.93 | P   | 272.17   | 136.59 | 255.15   | 128.08 |          |        | 2     |
| 14 |          |        |          |        | R   | 175.12   | 88.06  | 158.09   | 79.55  |          |        | 1     |

Query 49743 Hit 1

MS/MS Fragmentation of **EFLDDLF<sup>+</sup>FSFMQK**

Found in [sp|Q99856|AR13A\\_HUMAN](#), AT-rich interactive domain-containing protein 3A OS=Homo sapiens GN=ARID3A PE=1 SV=2

Match to Query 49743: 1806.914from(603.3121,3+)

Title: 1259: Scan 2793 (rt=72.2436, f=3, i=435) [D:\lab212\membrane\Grace\Joyce\iTRAQ\_27\_1.raw]

Data File: Submitted from 20120508-1(merge) by Mascot Daemon on JOYCE-VAIO

Monoisotopic mass of neutral peptide Mr(calc): 1806.914

Variable modifications:

K12 iTRAQ4plex (K)

Ions Score: 47.46 Expect: 0.016

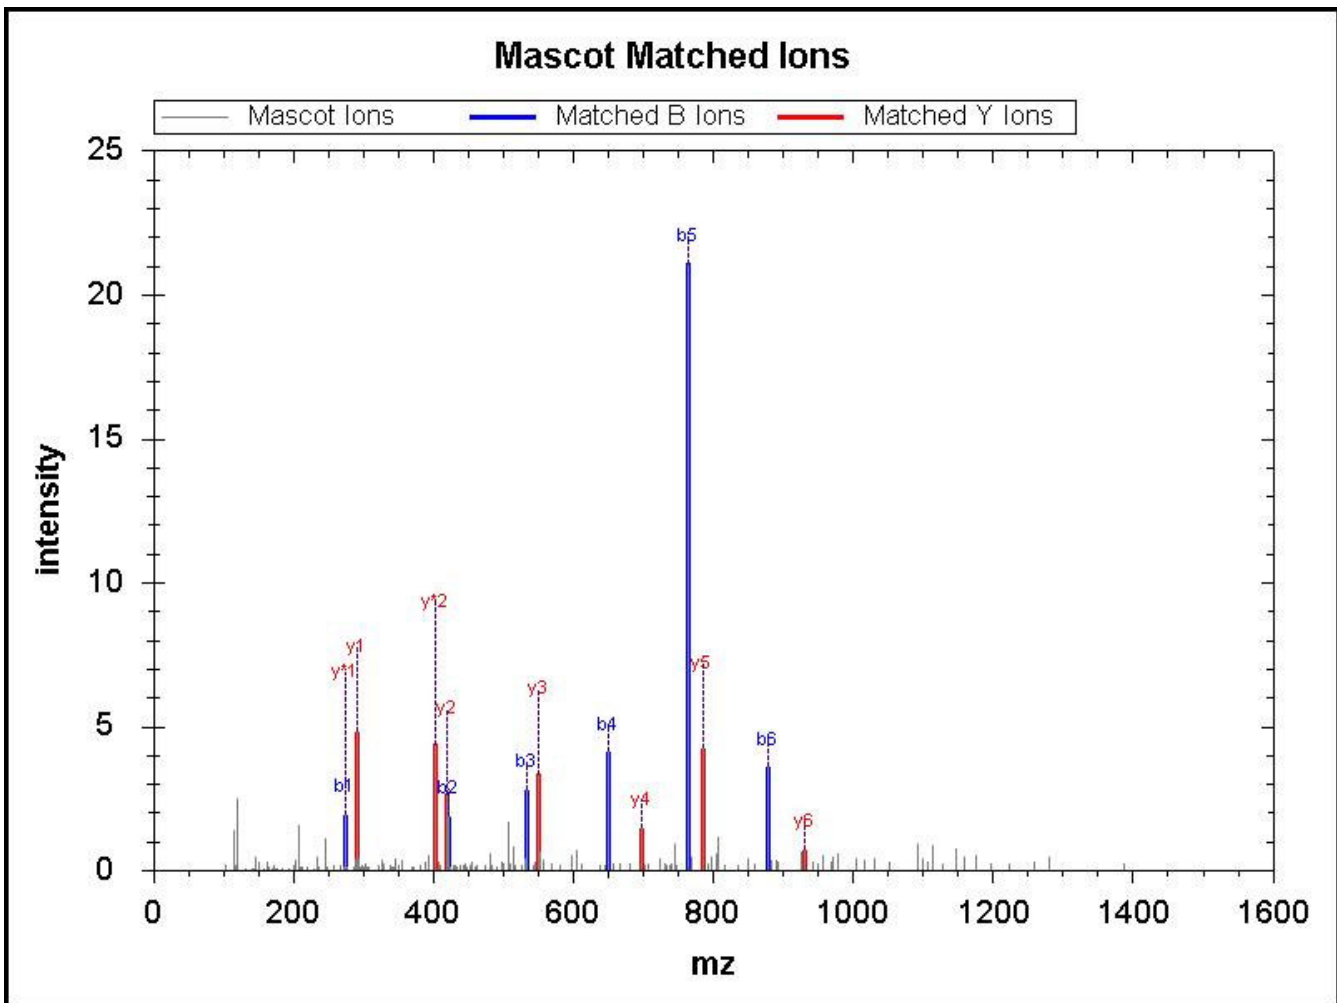

| No | b        | b++    | b*       | b*++   | b0       | b0++   | Seq | y        | y++    | y*       | y*++   | y0       | y0++   | RevNo |
|----|----------|--------|----------|--------|----------|--------|-----|----------|--------|----------|--------|----------|--------|-------|
| 1  | 274.15   | 137.58 |          |        | 256.14   | 128.57 | E   |          |        |          |        |          |        | 12    |
| 2  | 421.22   | 211.11 |          |        | 403.21   | 202.11 | F   | 1,534.77 | 767.89 | 1,517.75 | 759.38 | 1,516.76 | 758.89 | 11    |
| 3  | 534.30   | 267.66 |          |        | 516.29   | 258.65 | L   | 1,387.70 | 694.36 | 1,370.68 | 685.84 | 1,369.69 | 685.35 | 10    |
| 4  | 649.33   | 325.17 |          |        | 631.32   | 316.16 | D   | 1,274.62 | 637.81 | 1,257.59 | 629.30 | 1,256.61 | 628.81 | 9     |
| 5  | 764.36   | 382.68 |          |        | 746.35   | 373.68 | D   | 1,159.59 | 580.30 | 1,142.57 | 571.79 | 1,141.58 | 571.30 | 8     |
| 6  | 877.44   | 439.22 |          |        | 859.43   | 430.22 | L   | 1,044.57 | 522.79 | 1,027.54 | 514.27 | 1,026.56 | 513.78 | 7     |
| 7  | 1,024.51 | 512.76 |          |        | 1,006.50 | 503.75 | F   | 931.48   | 466.25 | 914.46   | 457.73 | 913.47   | 457.24 | 6     |
| 8  | 1,111.54 | 556.28 |          |        | 1,093.53 | 547.27 | S   | 784.41   | 392.71 | 767.39   | 384.20 | 766.40   | 383.71 | 5     |
| 9  | 1,258.61 | 629.81 |          |        | 1,240.60 | 620.80 | F   | 697.38   | 349.19 | 680.36   | 340.68 |          |        | 4     |
| 10 | 1,389.65 | 695.33 |          |        | 1,371.64 | 686.32 | M   | 550.31   | 275.66 | 533.29   | 267.15 |          |        | 3     |
| 11 | 1,517.71 | 759.36 | 1,500.68 | 750.85 | 1,499.70 | 750.35 | Q   | 419.27   | 210.14 | 402.25   | 201.63 |          |        | 2     |
| 12 |          |        |          |        |          |        | K   | 291.21   | 146.11 | 274.19   | 137.60 |          |        | 1     |

Query 89673 Hit 1

MS/MS Fragmentation of **QEELGDLVDKEMAATSAAIETATAR**

Found in **sp|O00291|HIP1\_HUMAN**, Huntingtin-interacting protein 1 OS=Homo sapiens GN=HIP1 PE=1 SV=5

Match to Query 89673: 2907.476from(727.8762,4+)

Title: 1002: Sum of 2 scans in range 2394 (rt=62.3887, f=4, i=663) to 2395 (rt=62.4141, f=4, i=664)

[D:\lab212\membrane\GraceJoyce\iTRAQ\_34\_1.raw]

Data File: Submitted from 20120508-1(merge) by Mascot Daemon on JOYCE-VAIO

Monoisotopic mass of neutral peptide Mr(calc): 2907.476

Variable modifications:

K10 iTRAQ4plex (K)

Ions Score: 47.36 Expect: 0.017





|    |          |          |          |          |          |          |   |        |        |        |        |  |  |   |
|----|----------|----------|----------|----------|----------|----------|---|--------|--------|--------|--------|--|--|---|
| 24 | 2,734.37 | 1,367.69 | 2,717.34 | 1,359.18 | 2,716.36 | 1,358.68 | A | 246.16 | 123.58 | 229.13 | 115.07 |  |  | 2 |
| 25 |          |          |          |          |          |          | R | 175.12 | 88.06  | 158.09 | 79.55  |  |  | 1 |

Query 75283 Hit 1

MS/MS Fragmentation of **GRPITMFIPSDVDNYDDIR**

Found in **sp|Q9HC35|EMAL4\_HUMAN**, Echinoderm microtubule-associated protein-like 4 OS=Homo sapiens GN=EML4 PE=1 SV=3

Match to Query 75283: 2367.161 from(790.061,3+)

Title: 738: Sum of 2 scans in range 1668 (rt=46.9589, f=4, i=495) to 1669 (rt=46.9843, f=4, i=496)

[D:\lab212\membrane\Grace\Joyce\iTRAQ\_35\_1.raw]

Data File: Submitted from 20120508-1(merge) by Mascot Daemon on JOYCE-VAIO

Monoisotopic mass of neutral peptide Mr(calc): 2367.161

Variable modifications:

Ions Score: 47.29 Expect: 0.017

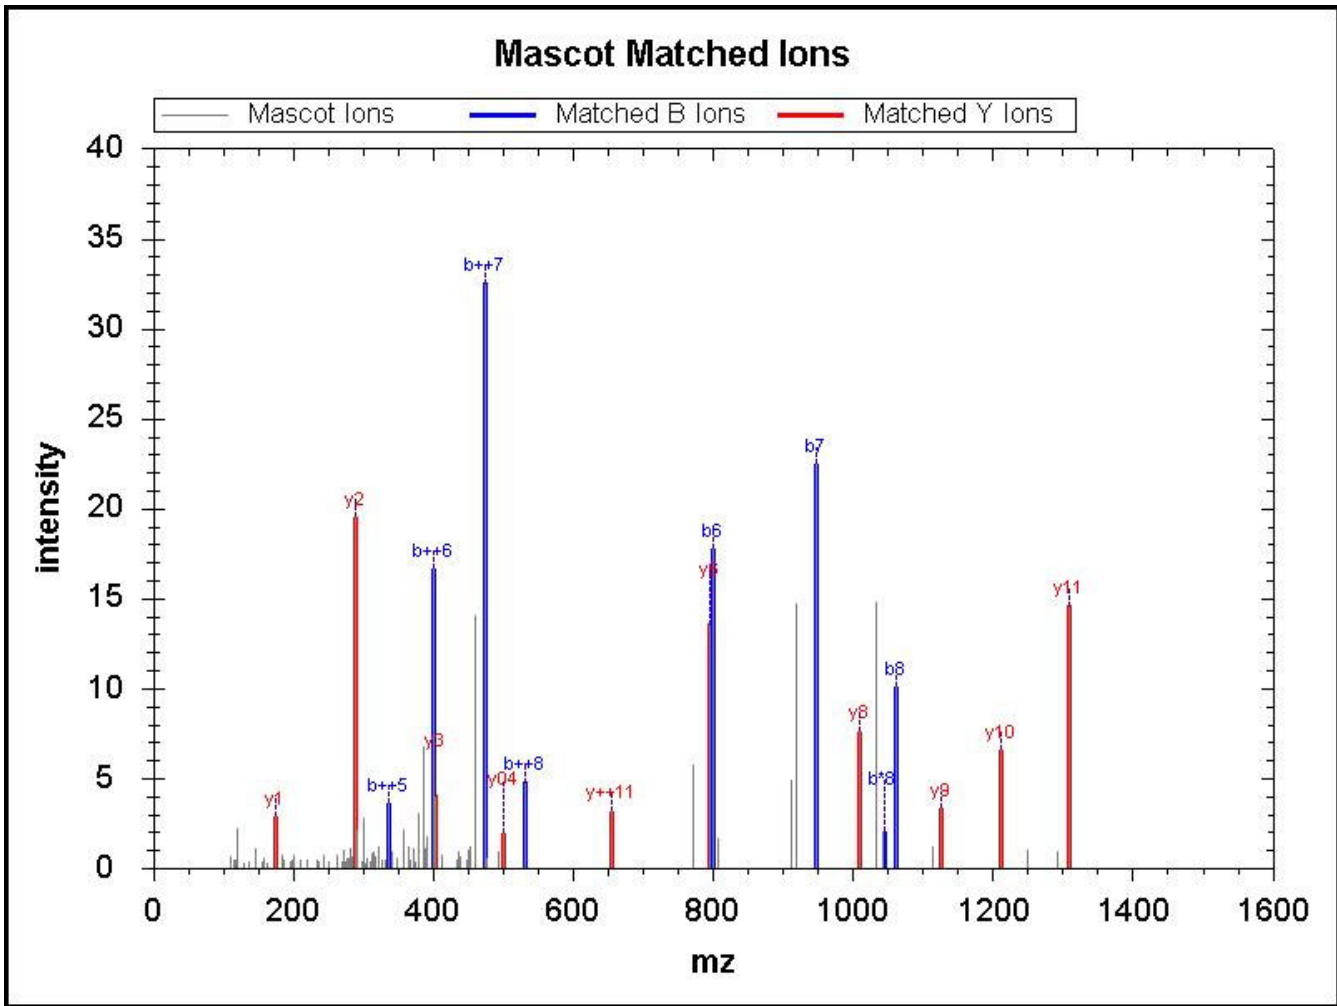

| No | b        | b++    | b*       | b*++   | b0       | b0++   | Seq | y        | y++      | y*       | y*++     | y0       | y0++     | RevNo |
|----|----------|--------|----------|--------|----------|--------|-----|----------|----------|----------|----------|----------|----------|-------|
| 1  | 202.13   | 101.57 |          |        |          |        | G   |          |          |          |          |          |          | 19    |
| 2  | 358.23   | 179.62 | 341.21   | 171.11 |          |        | R   | 2,167.05 | 1,084.03 | 2,150.02 | 1,075.51 | 2,149.04 | 1,075.02 | 18    |
| 3  | 455.28   | 228.15 | 438.26   | 219.63 |          |        | P   | 2,010.95 | 1,005.98 | 1,993.92 | 997.46   | 1,992.94 | 996.97   | 17    |
| 4  | 568.37   | 284.69 | 551.34   | 276.17 |          |        | I   | 1,913.90 | 957.45   | 1,896.87 | 948.94   | 1,895.88 | 948.45   | 16    |
| 5  | 669.42   | 335.21 | 652.39   | 326.70 | 651.41   | 326.21 | T   | 1,800.81 | 900.91   | 1,783.78 | 892.40   | 1,782.80 | 891.90   | 15    |
| 6  | 800.46   | 400.73 | 783.43   | 392.22 | 782.45   | 391.73 | M   | 1,699.76 | 850.39   | 1,682.74 | 841.87   | 1,681.75 | 841.38   | 14    |
| 7  | 947.53   | 474.27 | 930.50   | 465.75 | 929.51   | 465.26 | F   | 1,568.72 | 784.86   | 1,551.70 | 776.35   | 1,550.71 | 775.86   | 13    |
| 8  | 1,060.61 | 530.81 | 1,043.58 | 522.30 | 1,042.60 | 521.80 | I   | 1,421.65 | 711.33   | 1,404.63 | 702.82   | 1,403.64 | 702.33   | 12    |
| 9  | 1,157.66 | 579.33 | 1,140.64 | 570.82 | 1,139.65 | 570.33 | P   | 1,308.57 | 654.79   | 1,291.54 | 646.28   | 1,290.56 | 645.78   | 11    |
| 10 | 1,244.69 | 622.85 | 1,227.67 | 614.34 | 1,226.68 | 613.85 | S   | 1,211.52 | 606.26   | 1,194.49 | 597.75   | 1,193.51 | 597.26   | 10    |
| 11 | 1,359.72 | 680.36 | 1,342.69 | 671.85 | 1,341.71 | 671.36 | D   | 1,124.49 | 562.75   | 1,107.46 | 554.23   | 1,106.47 | 553.74   | 9     |

|    |          |          |          |          |          |          |   |          |        |        |        |        |        |   |
|----|----------|----------|----------|----------|----------|----------|---|----------|--------|--------|--------|--------|--------|---|
| 12 | 1,458.79 | 729.90   | 1,441.76 | 721.39   | 1,440.78 | 720.89   | V | 1,009.46 | 505.23 | 992.43 | 496.72 | 991.45 | 496.23 | 8 |
| 13 | 1,573.82 | 787.41   | 1,556.79 | 778.90   | 1,555.81 | 778.41   | D | 910.39   | 455.70 | 893.36 | 447.19 | 892.38 | 446.69 | 7 |
| 14 | 1,687.86 | 844.43   | 1,670.83 | 835.92   | 1,669.85 | 835.43   | N | 795.36   | 398.19 | 778.34 | 389.67 | 777.35 | 389.18 | 6 |
| 15 | 1,850.92 | 925.97   | 1,833.90 | 917.45   | 1,832.91 | 916.96   | Y | 681.32   | 341.16 | 664.29 | 332.65 | 663.31 | 332.16 | 5 |
| 16 | 1,965.95 | 983.48   | 1,948.92 | 974.97   | 1,947.94 | 974.47   | D | 518.26   | 259.63 | 501.23 | 251.12 | 500.25 | 250.63 | 4 |
| 17 | 2,080.98 | 1,040.99 | 2,063.95 | 1,032.48 | 2,062.97 | 1,031.99 | D | 403.23   | 202.12 | 386.20 | 193.61 | 385.22 | 193.11 | 3 |
| 18 | 2,194.06 | 1,097.53 | 2,177.03 | 1,089.02 | 2,176.05 | 1,088.53 | I | 288.20   | 144.61 | 271.18 | 136.09 |        |        | 2 |
| 19 |          |          |          |          |          |          | R | 175.12   | 88.06  | 158.09 | 79.55  |        |        | 1 |

Query 62204 Hit 1

MS/MS Fragmentation of **ELEELLESALDDFDK**

Found in **sp|P40855|PEX19\_HUMAN**, Peroxisomal biogenesis factor 19 OS=Homo sapiens GN=PEX19 PE=1 SV=1

Match to Query 62204: 2053.04from(685.354,3+)

Title: 1332: Sum of 2 scans in range 2953 (rt=75.8217, f=4, i=893) to 2954 (rt=75.8471, f=4, i=894)

[D:\lab212\membrane\Grace\Joyce\iTRAQ\_27\_1.raw]

Data File: Submitted from 20120508-1(merge) by Mascot Daemon on JOYCE-VAIO

Monoisotopic mass of neutral peptide Mr(calc): 2053.04

Variable modifications:

K15 iTRAQ4plex (K)

Ions Score: 47.27 Expect: 0.018

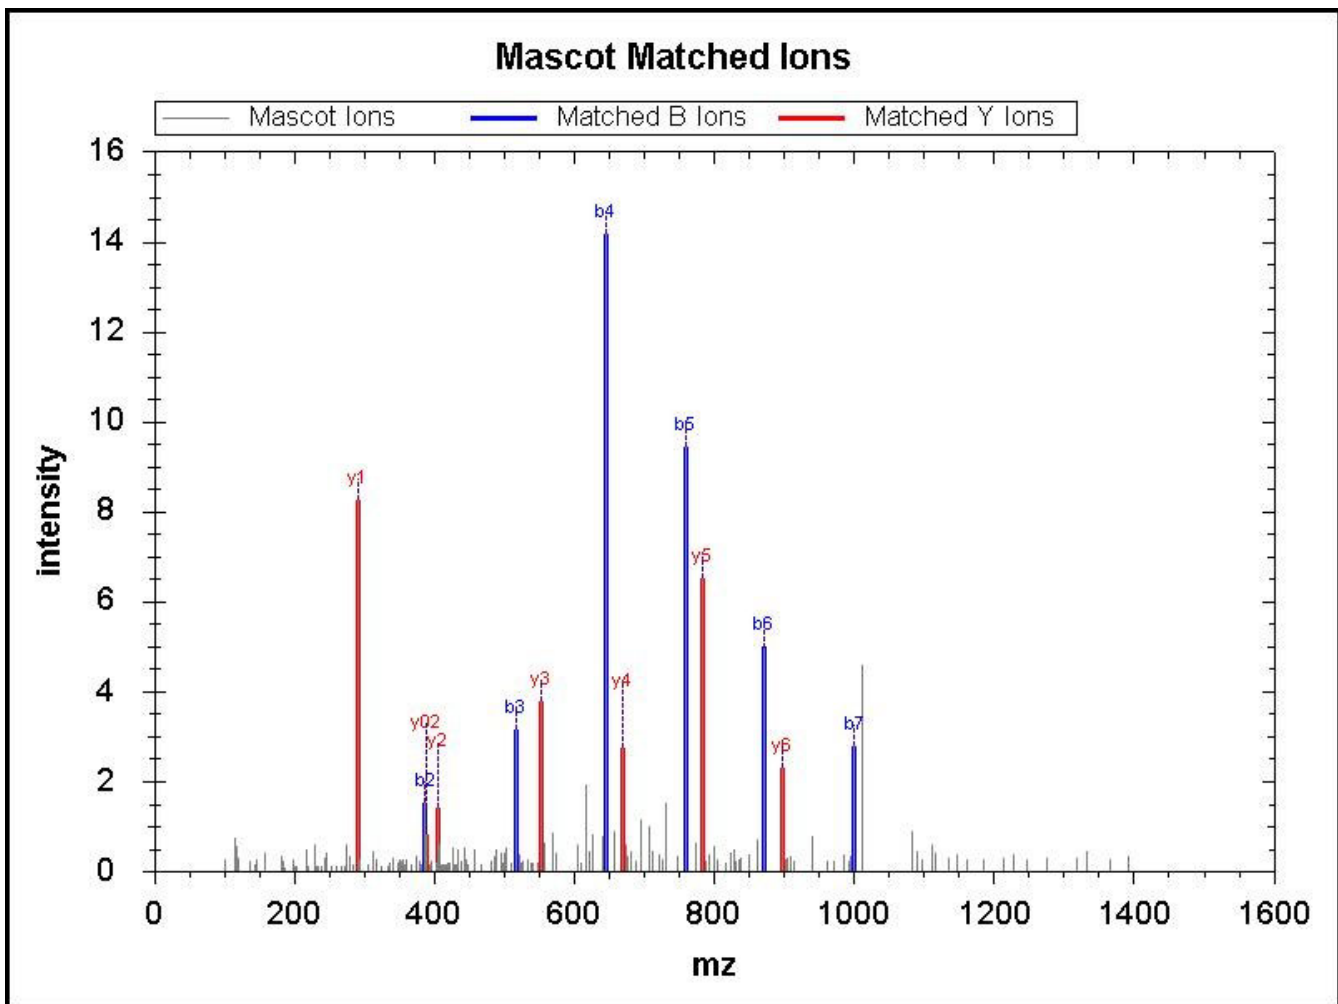

| No | b      | b++    | b0     | b0++   | Seq | y        | y++    | y*       | y*++   | y0       | y0++   | RevNo |
|----|--------|--------|--------|--------|-----|----------|--------|----------|--------|----------|--------|-------|
| 1  | 274.15 | 137.58 | 256.14 | 128.57 | E   |          |        |          |        |          |        | 15    |
| 2  | 387.24 | 194.12 | 369.23 | 185.12 | L   | 1,780.90 | 890.95 | 1,763.87 | 882.44 | 1,762.89 | 881.95 | 14    |
| 3  | 516.28 | 258.64 | 498.27 | 249.64 | E   | 1,667.81 | 834.41 | 1,650.79 | 825.90 | 1,649.80 | 825.40 | 13    |
| 4  | 645.32 | 323.16 | 627.31 | 314.16 | E   | 1,538.77 | 769.89 | 1,521.74 | 761.38 | 1,520.76 | 760.88 | 12    |

|    |          |        |          |        |   |          |        |          |        |          |        |    |
|----|----------|--------|----------|--------|---|----------|--------|----------|--------|----------|--------|----|
| 5  | 758.41   | 379.71 | 740.39   | 370.70 | L | 1,409.73 | 705.37 | 1,392.70 | 696.85 | 1,391.72 | 696.36 | 11 |
| 6  | 871.49   | 436.25 | 853.48   | 427.24 | L | 1,296.64 | 648.83 | 1,279.62 | 640.31 | 1,278.63 | 639.82 | 10 |
| 7  | 1,000.53 | 500.77 | 982.52   | 491.76 | E | 1,183.56 | 592.28 | 1,166.53 | 583.77 | 1,165.55 | 583.28 | 9  |
| 8  | 1,087.56 | 544.29 | 1,069.55 | 535.28 | S | 1,054.52 | 527.76 | 1,037.49 | 519.25 | 1,036.51 | 518.76 | 8  |
| 9  | 1,158.60 | 579.80 | 1,140.59 | 570.80 | A | 967.49   | 484.25 | 950.46   | 475.73 | 949.47   | 475.24 | 7  |
| 10 | 1,271.69 | 636.35 | 1,253.67 | 627.34 | L | 896.45   | 448.73 | 879.42   | 440.21 | 878.44   | 439.72 | 6  |
| 11 | 1,386.71 | 693.86 | 1,368.70 | 684.85 | D | 783.36   | 392.19 | 766.34   | 383.67 | 765.35   | 383.18 | 5  |
| 12 | 1,501.74 | 751.37 | 1,483.73 | 742.37 | D | 668.34   | 334.67 | 651.31   | 326.16 | 650.33   | 325.67 | 4  |
| 13 | 1,648.81 | 824.91 | 1,630.80 | 815.90 | F | 553.31   | 277.16 | 536.28   | 268.65 | 535.30   | 268.15 | 3  |
| 14 | 1,763.83 | 882.42 | 1,745.82 | 873.42 | D | 406.24   | 203.62 | 389.22   | 195.11 | 388.23   | 194.62 | 2  |
| 15 |          |        |          |        | K | 291.21   | 146.11 | 274.19   | 137.60 |          |        | 1  |

Query 65671 Hit 1

MS/MS Fragmentation of **VITSAWWVYHHQVSK**

Found in **sp|O60524|NEMF\_HUMAN**, Nuclear export mediator factor NEMF OS=Homo sapiens GN=NEMF PE=1 SV=4

Match to Query 65671: 2128.071 from (710.3641, 3+)

Title: 603: Sum of 2 scans in range 1323 (rt=39.496, f=4, i=403) to 1324 (rt=39.5214, f=4, i=404)

[D:\lab212\membrane\Grace\Joyce\iTRAQ\_50\_2.raw]

Data File: Submitted from 20120508-1(merge) by Mascot Daemon on JOYCE-VAIO

Monoisotopic mass of neutral peptide Mr(calc): 2128.071

Variable modifications:

K15 iTRAQ4plex (K)

Ions Score: 47.24 Expect: 0.018

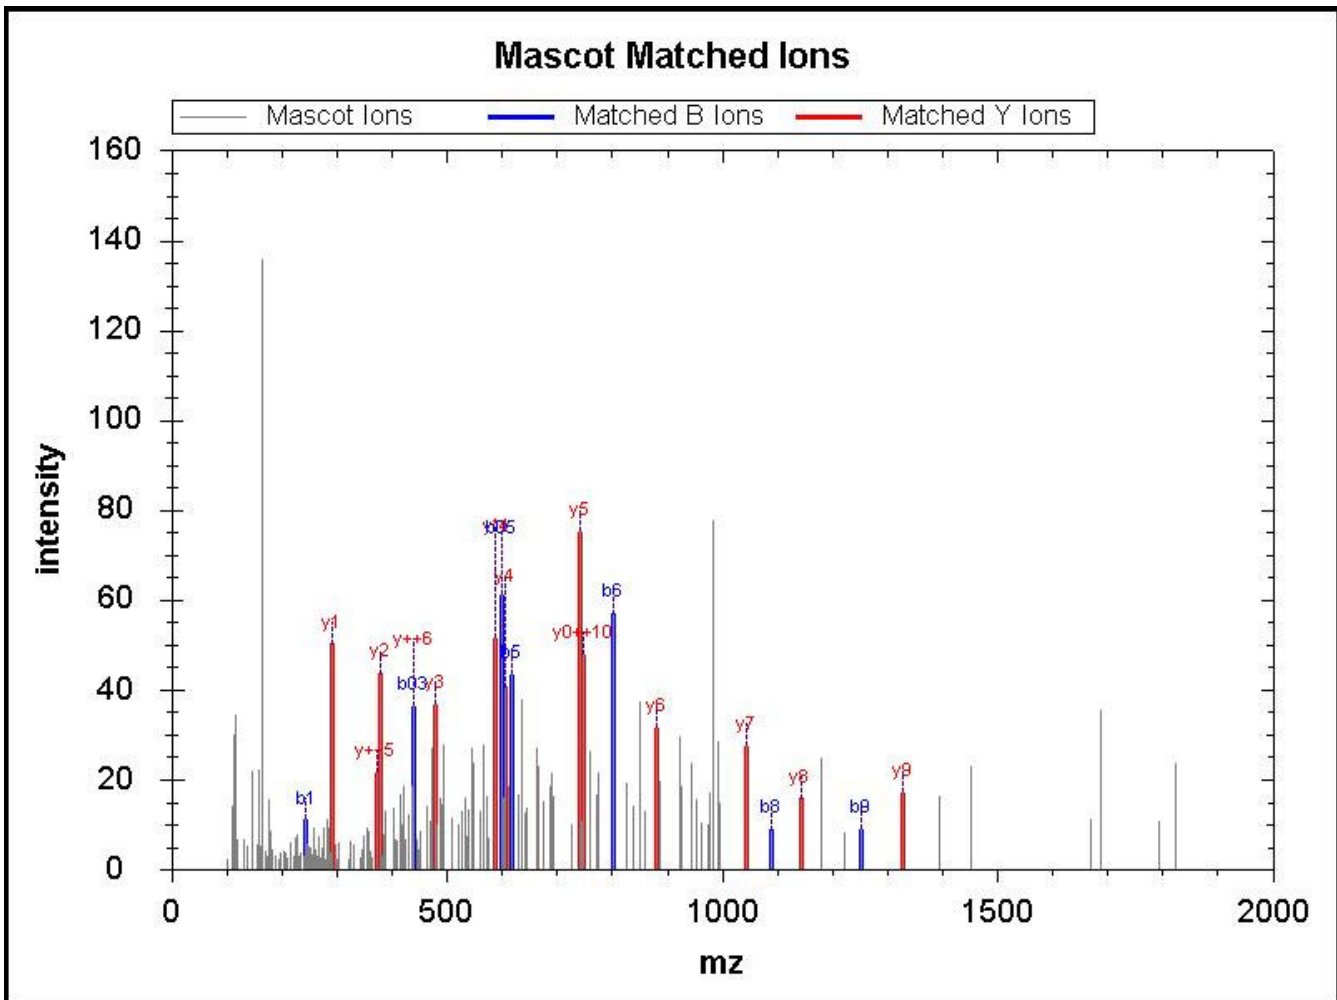

| No | b      | b++    | b* | b*++ | b0 | b0++ | Seq | y | y++ | y* | y*++ | y0 | y0++ | RevNo |
|----|--------|--------|----|------|----|------|-----|---|-----|----|------|----|------|-------|
| 1  | 244.18 | 122.59 |    |      |    |      | V   |   |     |    |      |    |      | 15    |

|    |          |        |          |        |          |        |   |          |        |          |        |          |        |    |
|----|----------|--------|----------|--------|----------|--------|---|----------|--------|----------|--------|----------|--------|----|
| 2  | 357.26   | 179.13 |          |        |          |        | I | 1,885.98 | 943.50 | 1,868.96 | 934.98 | 1,867.97 | 934.49 | 14 |
| 3  | 458.31   | 229.66 |          |        | 440.30   | 220.65 | T | 1,772.90 | 886.95 | 1,755.87 | 878.44 | 1,754.89 | 877.95 | 13 |
| 4  | 545.34   | 273.17 |          |        | 527.33   | 264.17 | S | 1,671.85 | 836.43 | 1,654.82 | 827.92 | 1,653.84 | 827.42 | 12 |
| 5  | 616.38   | 308.69 |          |        | 598.37   | 299.69 | A | 1,584.82 | 792.91 | 1,567.79 | 784.40 | 1,566.81 | 783.91 | 11 |
| 6  | 802.46   | 401.73 |          |        | 784.45   | 392.73 | W | 1,513.78 | 757.39 | 1,496.76 | 748.88 | 1,495.77 | 748.39 | 10 |
| 7  | 988.54   | 494.77 |          |        | 970.53   | 485.77 | W | 1,327.70 | 664.36 | 1,310.68 | 655.84 | 1,309.69 | 655.35 | 9  |
| 8  | 1,087.61 | 544.31 |          |        | 1,069.60 | 535.30 | V | 1,141.62 | 571.32 | 1,124.60 | 562.80 | 1,123.61 | 562.31 | 8  |
| 9  | 1,250.67 | 625.84 |          |        | 1,232.66 | 616.83 | Y | 1,042.56 | 521.78 | 1,025.53 | 513.27 | 1,024.54 | 512.78 | 7  |
| 10 | 1,387.73 | 694.37 |          |        | 1,369.72 | 685.36 | H | 879.49   | 440.25 | 862.47   | 431.74 | 861.48   | 431.24 | 6  |
| 11 | 1,524.79 | 762.90 |          |        | 1,506.78 | 753.89 | H | 742.43   | 371.72 | 725.41   | 363.21 | 724.42   | 362.71 | 5  |
| 12 | 1,652.85 | 826.93 | 1,635.82 | 818.41 | 1,634.83 | 817.92 | Q | 605.37   | 303.19 | 588.35   | 294.68 | 587.36   | 294.19 | 4  |
| 13 | 1,751.91 | 876.46 | 1,734.89 | 867.95 | 1,733.90 | 867.46 | V | 477.32   | 239.16 | 460.29   | 230.65 | 459.30   | 230.16 | 3  |
| 14 | 1,838.95 | 919.98 | 1,821.92 | 911.46 | 1,820.94 | 910.97 | S | 378.25   | 189.63 | 361.22   | 181.11 | 360.24   | 180.62 | 2  |
| 15 |          |        |          |        |          |        | K | 291.21   | 146.11 | 274.19   | 137.60 |          |        | 1  |

Query 17394 Hit 1

MS/MS Fragmentation of **LPLIFHLGR**

Found in [sp|P34059|GALNS\\_HUMAN](#), N-acetylgalactosamine-6-sulfatase OS=Homo sapiens GN=GALNS PE=1 SV=1

Match to Query 17394: 1208.752from(403.9246,3+)

Title: 846: Sum of 2 scans in range 1883 (rt=51.9289, f=4, i=565) to 1884 (rt=51.9543, f=4, i=566)

[D:\lab212\membrane\Grace\Joyce\iTRAQ\_39\_1.raw]

Data File: Submitted from 20120508-1(merge) by Mascot Daemon on JOYCE-VAIO

Monoisotopic mass of neutral peptide Mr(calc): 1208.752

Variable modifications:

Ions Score: 47.24 Expect: 0.008

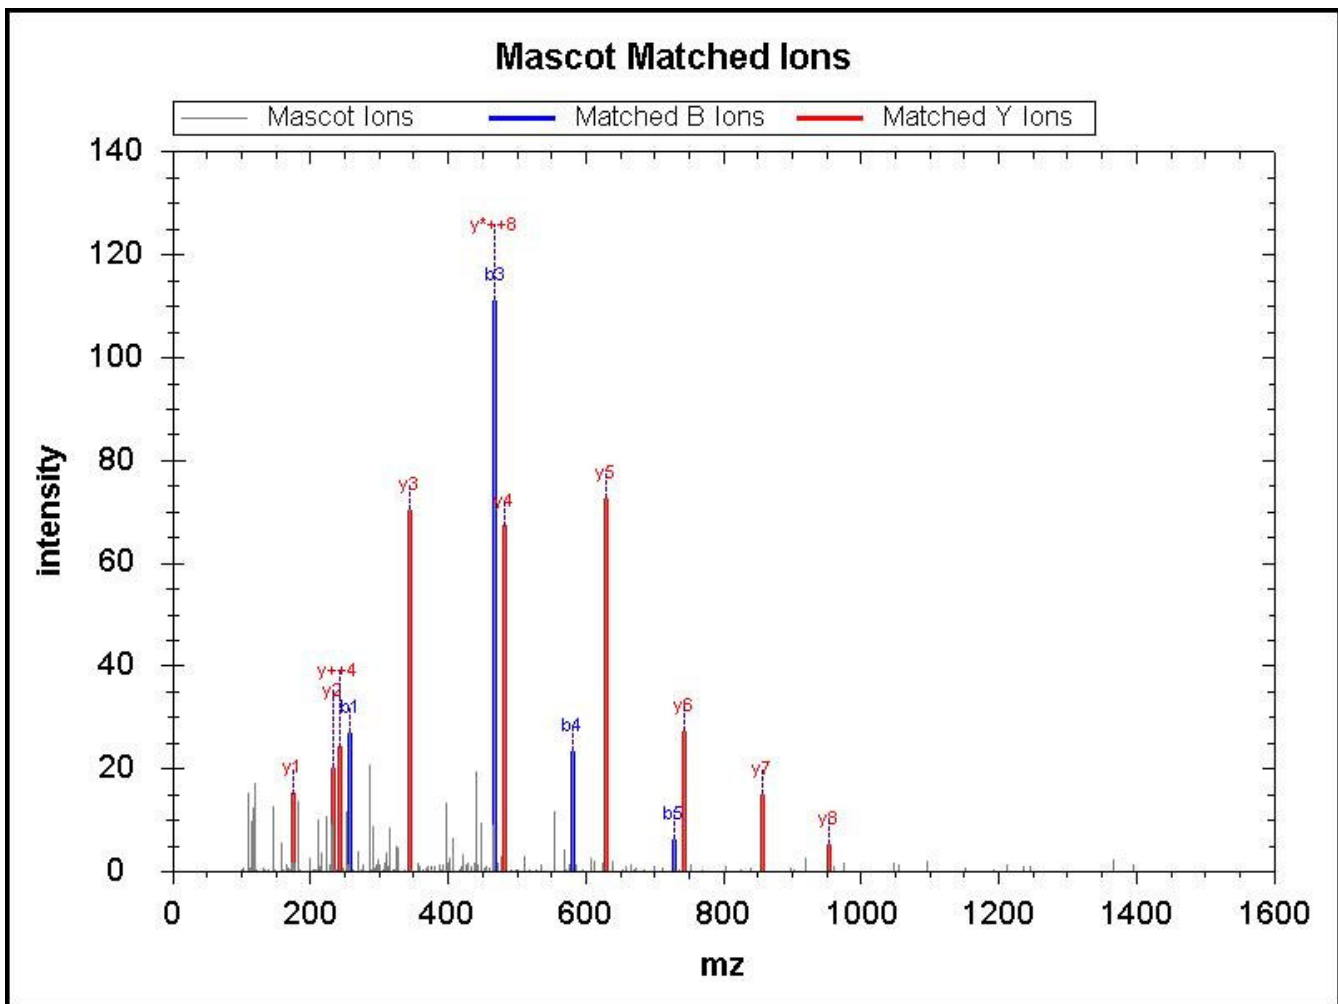

| No | b | b++ | Seq | y | y++ | y* | y*++ | RevNo |
|----|---|-----|-----|---|-----|----|------|-------|
|----|---|-----|-----|---|-----|----|------|-------|

|   |          |        |   |        |        |        |        |  |   |
|---|----------|--------|---|--------|--------|--------|--------|--|---|
| 1 | 258.19   | 129.60 | L |        |        |        |        |  | 9 |
| 2 | 355.25   | 178.13 | P | 952.57 | 476.79 | 935.55 | 468.28 |  | 8 |
| 3 | 468.33   | 234.67 | L | 855.52 | 428.26 | 838.49 | 419.75 |  | 7 |
| 4 | 581.41   | 291.21 | I | 742.44 | 371.72 | 725.41 | 363.21 |  | 6 |
| 5 | 728.48   | 364.74 | F | 629.35 | 315.18 | 612.33 | 306.67 |  | 5 |
| 6 | 865.54   | 433.27 | H | 482.28 | 241.65 | 465.26 | 233.13 |  | 4 |
| 7 | 978.63   | 489.82 | L | 345.22 | 173.12 | 328.20 | 164.60 |  | 3 |
| 8 | 1,035.65 | 518.33 | G | 232.14 | 116.57 | 215.11 | 108.06 |  | 2 |
| 9 |          |        | R | 175.12 | 88.06  | 158.09 | 79.55  |  | 1 |

Query 31050 Hit 1

MS/MS Fragmentation of **FDLLEELVAK**

Found in **sp|Q8WWC4|CB047\_HUMAN**, Uncharacterized protein C2orf47

Match to Query 31050: 1463.844from(732.9293,2+)

Title: 1033: Sum of 2 scans in range 2268 (rt=60.744, f=4, i=701) to 2269 (rt=60.7694, f=4, i=702)

[D:\lab212\membrane\Grace\Joyce\iTRAQ\_27\_2\_327.raw]

Data File: Submitted from 20120508-1(merge) by Mascot Daemon on JOYCE-VAIO

Monoisotopic mass of neutral peptide Mr(calc): 1463.844

Variable modifications:

K10 :iTRAQ4plex (K)

Ions Score: 47.2 Expect: 0.013

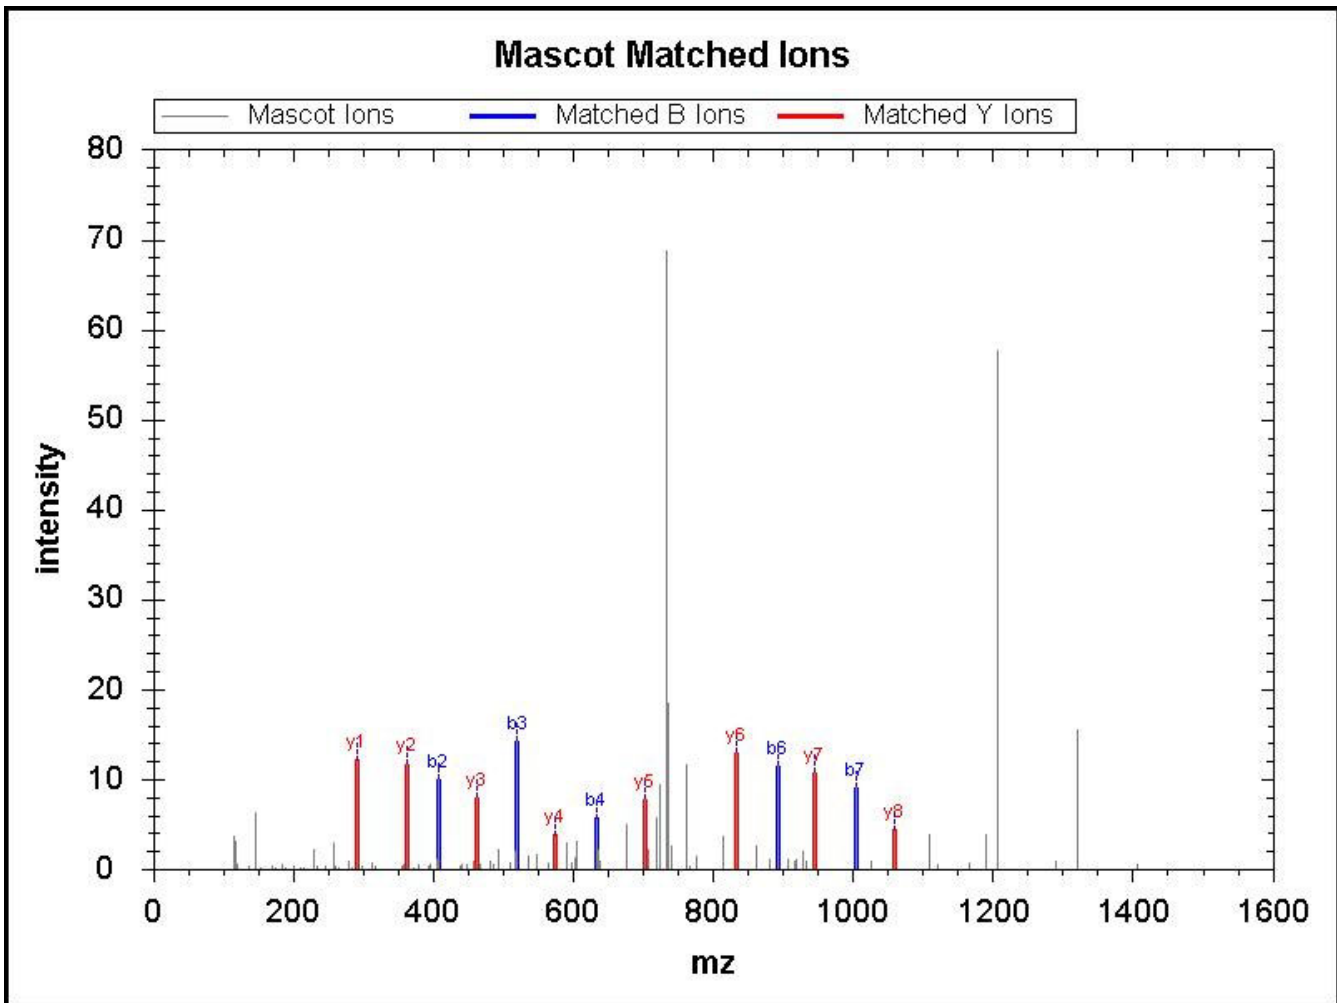

| No | b      | b++    | b0     | b0++   | Seq | y        | y++    | y*       | y*++   | y0       | y0++   | RevNo |
|----|--------|--------|--------|--------|-----|----------|--------|----------|--------|----------|--------|-------|
| 1  | 292.18 | 146.59 |        |        | F   |          |        |          |        |          |        | 10    |
| 2  | 407.20 | 204.11 | 389.19 | 195.10 | D   | 1,173.68 | 587.35 | 1,156.66 | 578.83 | 1,155.67 | 578.34 | 9     |
| 3  | 520.29 | 260.65 | 502.28 | 251.64 | L   | 1,058.66 | 529.83 | 1,041.63 | 521.32 | 1,040.65 | 520.83 | 8     |
| 4  | 633.37 | 317.19 | 615.36 | 308.18 | L   | 945.57   | 473.29 | 928.55   | 464.78 | 927.56   | 464.29 | 7     |

|    |          |        |          |        |   |        |        |        |        |        |        |   |
|----|----------|--------|----------|--------|---|--------|--------|--------|--------|--------|--------|---|
| 5  | 762.42   | 381.71 | 744.40   | 372.71 | E | 832.49 | 416.75 | 815.46 | 408.24 | 814.48 | 407.74 | 6 |
| 6  | 891.46   | 446.23 | 873.45   | 437.23 | E | 703.45 | 352.23 | 686.42 | 343.71 | 685.44 | 343.22 | 5 |
| 7  | 1,004.54 | 502.77 | 986.53   | 493.77 | L | 574.40 | 287.71 | 557.38 | 279.19 |        |        | 4 |
| 8  | 1,103.61 | 552.31 | 1,085.60 | 543.30 | V | 461.32 | 231.16 | 444.29 | 222.65 |        |        | 3 |
| 9  | 1,174.65 | 587.83 | 1,156.64 | 578.82 | A | 362.25 | 181.63 | 345.23 | 173.12 |        |        | 2 |
| 10 |          |        |          |        | K | 291.21 | 146.11 | 274.19 | 137.60 |        |        | 1 |

Query 35982 Hit 1

MS/MS Fragmentation of **RPEEVALGLHHR**

Found in **sp|Q96ER9|CCDC51\_HUMAN**, Coiled-coil domain-containing protein 51 OS=Homo sapiens GN=CCDC51 PE=1 SV=2

Match to Query 35982: 1556.863from(390.2231,4+)

Title: 195: Scan 462 (rt=20.2486, f=3, i=71) [D:\lab212\membrane\Grace\Joyce\iTRAQ\_56\_1\_330.raw]

Data File:Submitted from 20120508-1(merge) by Mascot Daemon on JOYCE-VAIO

Monoisotopic mass of neutral peptide Mr(calc): 1556.863

Variable modifications:

Ions Score: 47.2 Expect: 0.014

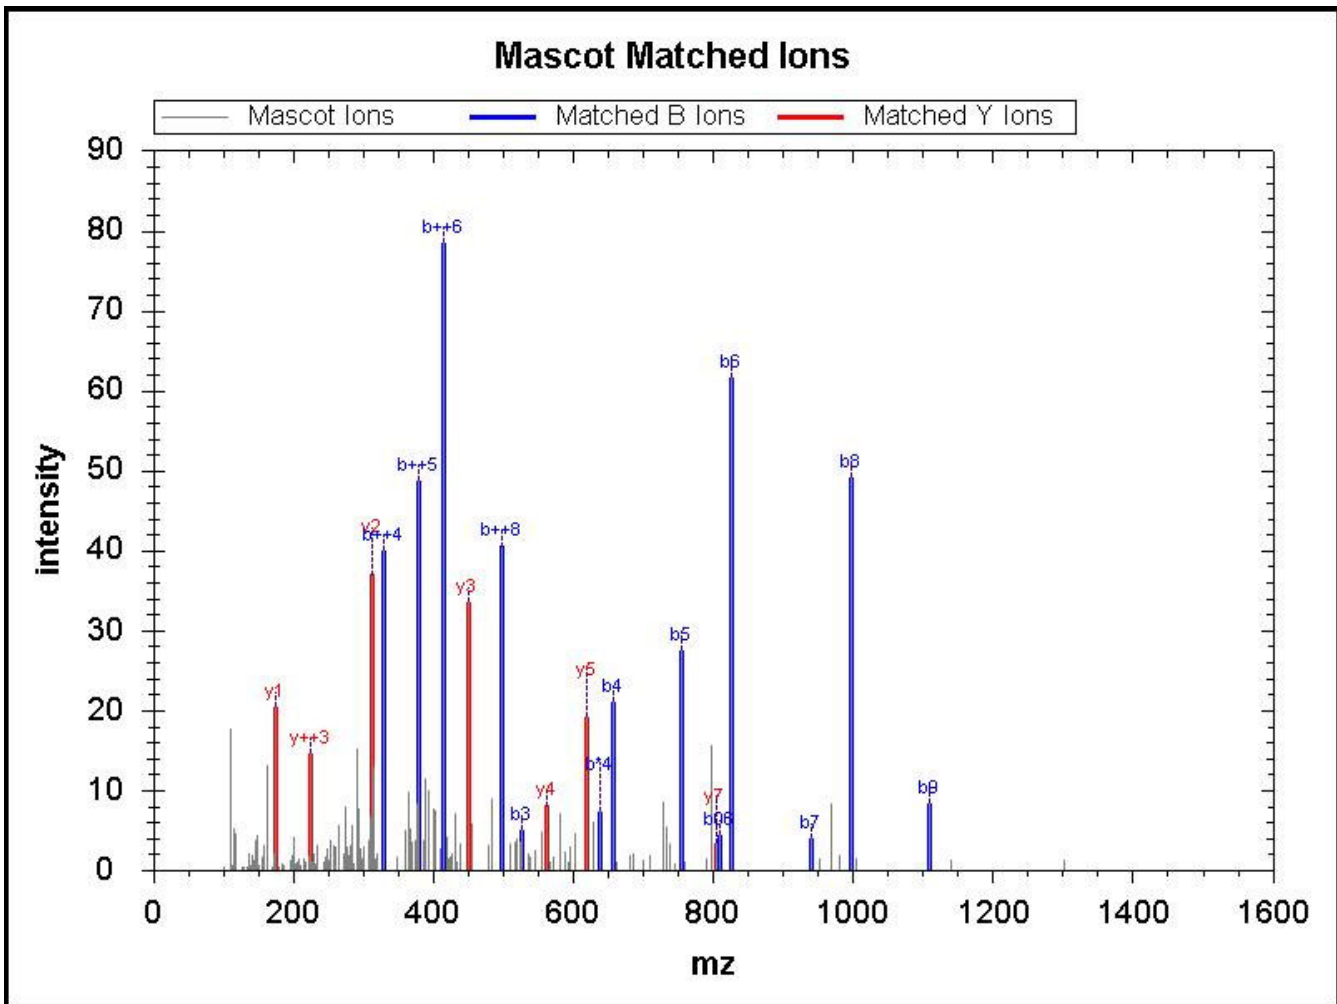

| No | b      | b++    | b*     | b*++   | b0     | b0++   | Seq | y        | y++    | y*       | y*++   | y0       | y0++   | RevNo |
|----|--------|--------|--------|--------|--------|--------|-----|----------|--------|----------|--------|----------|--------|-------|
| 1  | 301.21 | 151.11 | 284.18 | 142.60 |        |        | R   |          |        |          |        |          |        | 12    |
| 2  | 398.26 | 199.64 | 381.24 | 191.12 |        |        | P   | 1,257.67 | 629.34 | 1,240.64 | 620.83 | 1,239.66 | 620.33 | 11    |
| 3  | 527.31 | 264.16 | 510.28 | 255.64 | 509.30 | 255.15 | E   | 1,160.62 | 580.81 | 1,143.59 | 572.30 | 1,142.61 | 571.81 | 10    |
| 4  | 656.35 | 328.68 | 639.32 | 320.16 | 638.34 | 319.67 | E   | 1,031.57 | 516.29 | 1,014.55 | 507.78 | 1,013.56 | 507.29 | 9     |
| 5  | 755.42 | 378.21 | 738.39 | 369.70 | 737.41 | 369.21 | V   | 902.53   | 451.77 | 885.51   | 443.26 |          |        | 8     |
| 6  | 826.45 | 413.73 | 809.43 | 405.22 | 808.44 | 404.73 | A   | 803.46   | 402.24 | 786.44   | 393.72 |          |        | 7     |
| 7  | 939.54 | 470.27 | 922.51 | 461.76 | 921.53 | 461.27 | L   | 732.43   | 366.72 | 715.40   | 358.20 |          |        | 6     |
| 8  | 996.56 | 498.78 | 979.53 | 490.27 | 978.55 | 489.78 | G   | 619.34   | 310.17 | 602.32   | 301.66 |          |        | 5     |

|    |          |        |          |        |          |        |   |        |        |        |        |  |  |   |
|----|----------|--------|----------|--------|----------|--------|---|--------|--------|--------|--------|--|--|---|
| 9  | 1,109.64 | 555.33 | 1,092.62 | 546.81 | 1,091.63 | 546.32 | L | 562.32 | 281.66 | 545.29 | 273.15 |  |  | 4 |
| 10 | 1,246.70 | 623.85 | 1,229.68 | 615.34 | 1,228.69 | 614.85 | H | 449.24 | 225.12 | 432.21 | 216.61 |  |  | 3 |
| 11 | 1,383.76 | 692.38 | 1,366.73 | 683.87 | 1,365.75 | 683.38 | H | 312.18 | 156.59 | 295.15 | 148.08 |  |  | 2 |
| 12 |          |        |          |        |          |        | R | 175.12 | 88.06  | 158.09 | 79.55  |  |  | 1 |

Query 66724 Hit 1

MS/MS Fragmentation of **NIFHLFHDVVPTYHK**

Found in [sp|O43264|ZW10\\_HUMAN](#), Centromere/kinetochore protein zw10 homolog OS=Homo sapiens GN=ZW10 PE=1 SV=3

Match to Query 66724: 2154.167from(539.549,4+)

Title: 809: Scan 1727 (rt=48.5562, f=3, i=268) [D:\lab212\membrane\Grace\Joyce\54-2.raw]

Data File: Submitted from 20120508-1(merge) by Mascot Daemon on JOYCE-VAIO

Monoisotopic mass of neutral peptide Mr(calc): 2154.167

Variable modifications:

K15 iTRAQ4plex (K)

Ions Score: 47.2 Expect: 0.015

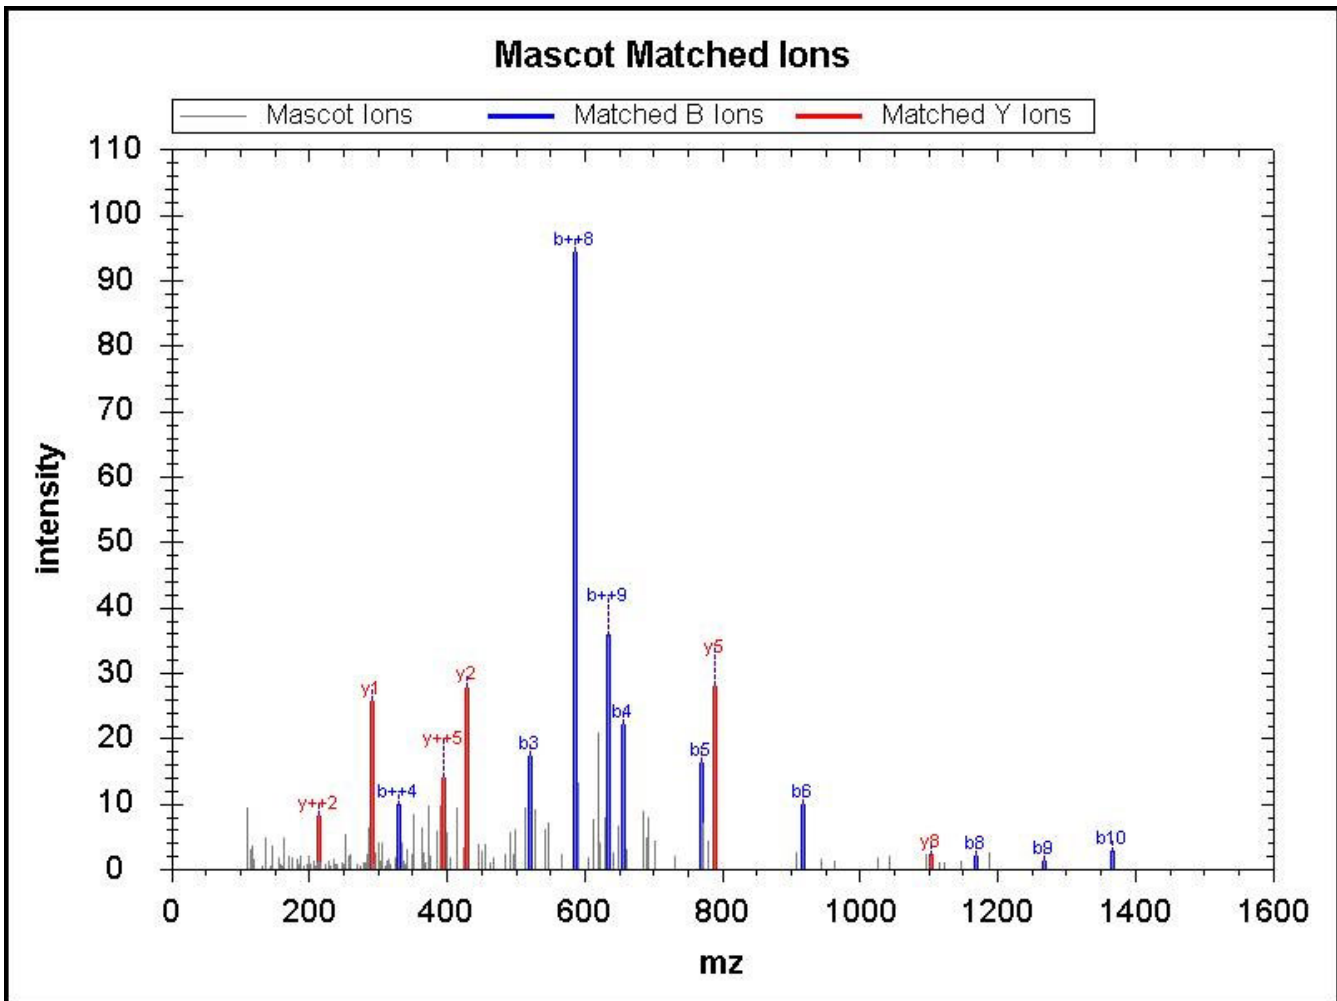

| No | b        | b++    | b*       | b*++   | b0       | b0++   | Seq | y        | y++    | y*       | y*++   | y0       | y0++   | RevNo |
|----|----------|--------|----------|--------|----------|--------|-----|----------|--------|----------|--------|----------|--------|-------|
| 1  | 259.15   | 130.08 | 242.13   | 121.57 |          |        | N   |          |        |          |        |          |        | 15    |
| 2  | 372.24   | 186.62 | 355.21   | 178.11 |          |        | I   | 1,897.02 | 949.02 | 1,880.00 | 940.50 | 1,879.01 | 940.01 | 14    |
| 3  | 519.30   | 260.16 | 502.28   | 251.64 |          |        | F   | 1,783.94 | 892.47 | 1,766.91 | 883.96 | 1,765.93 | 883.47 | 13    |
| 4  | 656.36   | 328.69 | 639.34   | 320.17 |          |        | H   | 1,636.87 | 818.94 | 1,619.85 | 810.43 | 1,618.86 | 809.93 | 12    |
| 5  | 769.45   | 385.23 | 752.42   | 376.71 |          |        | L   | 1,499.81 | 750.41 | 1,482.79 | 741.90 | 1,481.80 | 741.40 | 11    |
| 6  | 916.52   | 458.76 | 899.49   | 450.25 |          |        | F   | 1,386.73 | 693.87 | 1,369.70 | 685.35 | 1,368.72 | 684.86 | 10    |
| 7  | 1,053.58 | 527.29 | 1,036.55 | 518.78 |          |        | H   | 1,239.66 | 620.33 | 1,222.63 | 611.82 | 1,221.65 | 611.33 | 9     |
| 8  | 1,168.60 | 584.80 | 1,151.58 | 576.29 | 1,150.59 | 575.80 | D   | 1,102.60 | 551.80 | 1,085.57 | 543.29 | 1,084.59 | 542.80 | 8     |
| 9  | 1,267.67 | 634.34 | 1,250.64 | 625.83 | 1,249.66 | 625.33 | V   | 987.57   | 494.29 | 970.55   | 485.78 | 969.56   | 485.29 | 7     |
| 10 | 1,366.74 | 683.87 | 1,349.71 | 675.36 | 1,348.73 | 674.87 | V   | 888.51   | 444.76 | 871.48   | 436.24 | 870.50   | 435.75 | 6     |



|    |          |        |          |        |          |        |   |        |        |        |        |        |        |   |
|----|----------|--------|----------|--------|----------|--------|---|--------|--------|--------|--------|--------|--------|---|
| 11 | 1,463.79 | 732.40 | 1,446.77 | 723.89 | 1,445.78 | 723.39 | P | 789.44 | 395.22 | 772.41 | 386.71 | 771.43 | 386.22 | 5 |
| 12 | 1,564.84 | 782.92 | 1,547.81 | 774.41 | 1,546.83 | 773.92 | T | 692.38 | 346.70 | 675.36 | 338.18 | 674.37 | 337.69 | 4 |
| 13 | 1,727.90 | 864.45 | 1,710.88 | 855.94 | 1,709.89 | 855.45 | Y | 591.34 | 296.17 | 574.31 | 287.66 |        |        | 3 |
| 14 | 1,864.96 | 932.98 | 1,847.94 | 924.47 | 1,846.95 | 923.98 | H | 428.27 | 214.64 | 411.25 | 206.13 |        |        | 2 |
| 15 |          |        |          |        |          |        | K | 291.21 | 146.11 | 274.19 | 137.60 |        |        | 1 |

Query 41953 Hit 1

MS/MS Fragmentation of **TVHAGEVGS**AEVVK

Found in **sp|P00813|ADA\_HUMAN**, Adenosine deaminase OS=Homo sapiens GN=ADA PE=1 SV=3

Match to Query 41953: 1669.926from(557.6494,3+)

Title: 234: Sum of 2 scans in range 603 (rt=23.1192, f=4, i=153) to 604 (rt=23.1446, f=4, i=154)

[D:\lab212\membrane\GraceJoyce\iTRAQ\_41\_2.raw]

Data File:Submitted from 20120508-1(merge) by Mascot Daemon on JOYCE-VAIO

Monoisotopic mass of neutral peptide Mr(calc): 1669.926

Variable modifications:

K14 iTRAQ4plex (K)

Ions Score: 47.15 Expect: 0.014

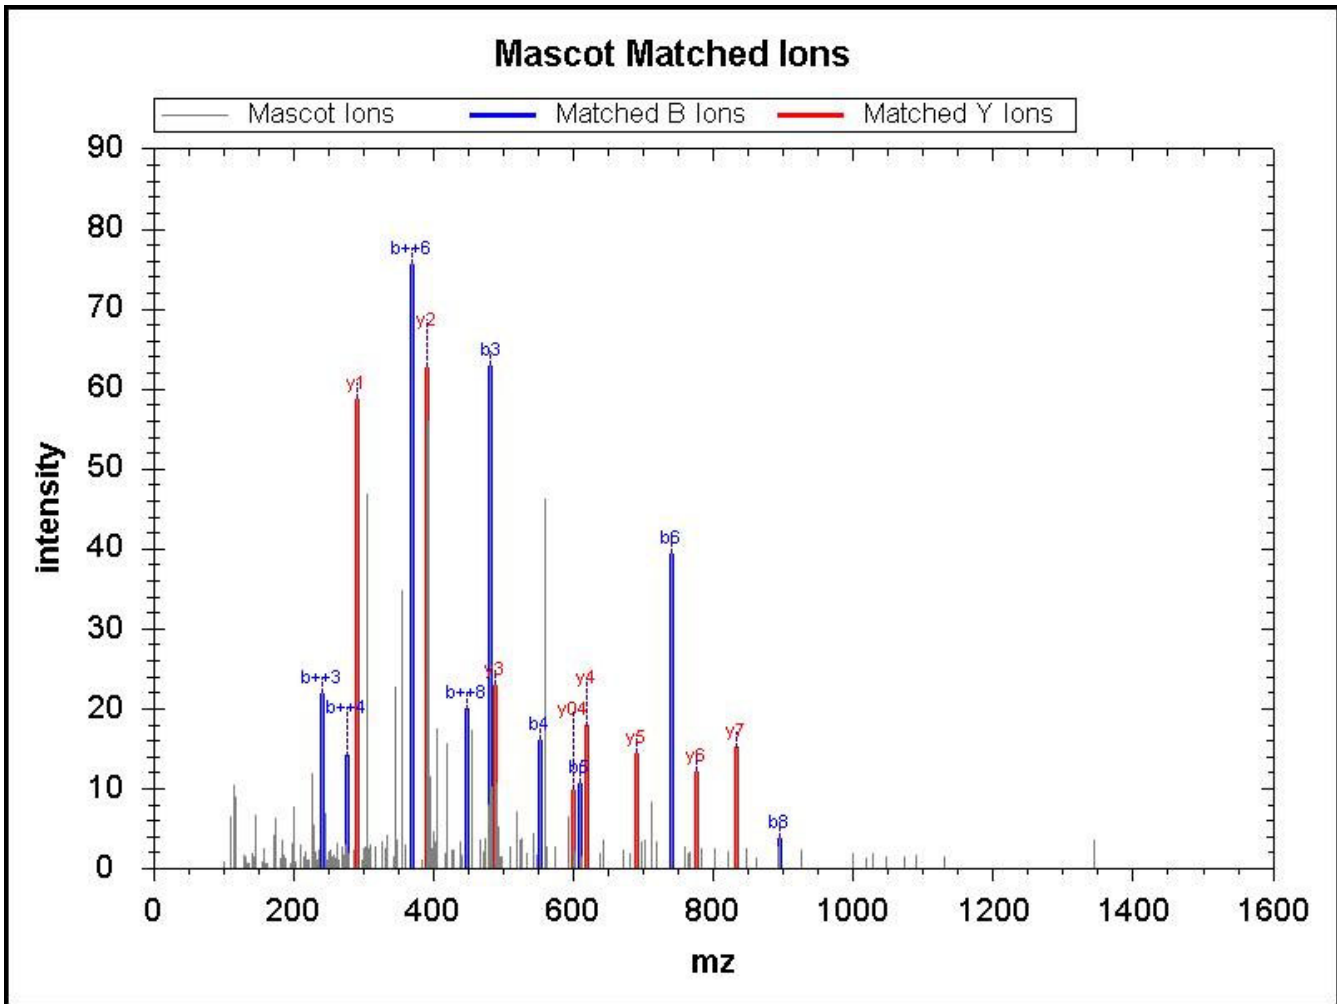

| No | b      | b++    | b0     | b0++   | Seq | y        | y++    | y*       | y*++   | y0       | y0++   | RevNo |
|----|--------|--------|--------|--------|-----|----------|--------|----------|--------|----------|--------|-------|
| 1  | 246.16 | 123.58 | 228.15 | 114.58 | T   |          |        |          |        |          |        | 14    |
| 2  | 345.23 | 173.12 | 327.21 | 164.11 | V   | 1,425.78 | 713.39 | 1,408.76 | 704.88 | 1,407.77 | 704.39 | 13    |
| 3  | 482.28 | 241.65 | 464.27 | 232.64 | H   | 1,326.71 | 663.86 | 1,309.69 | 655.35 | 1,308.70 | 654.86 | 12    |
| 4  | 553.32 | 277.16 | 535.31 | 268.16 | A   | 1,189.65 | 595.33 | 1,172.63 | 586.82 | 1,171.64 | 586.33 | 11    |
| 5  | 610.34 | 305.68 | 592.33 | 296.67 | G   | 1,118.62 | 559.81 | 1,101.59 | 551.30 | 1,100.61 | 550.81 | 10    |
| 6  | 739.39 | 370.20 | 721.38 | 361.19 | E   | 1,061.60 | 531.30 | 1,044.57 | 522.79 | 1,043.59 | 522.30 | 9     |
| 7  | 838.45 | 419.73 | 820.44 | 410.73 | V   | 932.55   | 466.78 | 915.53   | 458.27 | 914.54   | 457.78 | 8     |
| 8  | 895.48 | 448.24 | 877.46 | 439.24 | G   | 833.48   | 417.25 | 816.46   | 408.73 | 815.47   | 408.24 | 7     |

|    |          |        |          |        |   |        |        |        |        |        |        |   |
|----|----------|--------|----------|--------|---|--------|--------|--------|--------|--------|--------|---|
| 9  | 982.51   | 491.76 | 964.50   | 482.75 | S | 776.46 | 388.74 | 759.44 | 380.22 | 758.45 | 379.73 | 6 |
| 10 | 1,053.54 | 527.28 | 1,035.53 | 518.27 | A | 689.43 | 345.22 | 672.40 | 336.71 | 671.42 | 336.21 | 5 |
| 11 | 1,182.59 | 591.80 | 1,164.58 | 582.79 | E | 618.39 | 309.70 | 601.37 | 301.19 | 600.38 | 300.70 | 4 |
| 12 | 1,281.66 | 641.33 | 1,263.65 | 632.33 | V | 489.35 | 245.18 | 472.33 | 236.67 |        |        | 3 |
| 13 | 1,380.72 | 690.87 | 1,362.71 | 681.86 | V | 390.28 | 195.65 | 373.26 | 187.13 |        |        | 2 |
| 14 |          |        |          |        | K | 291.21 | 146.11 | 274.19 | 137.60 |        |        | 1 |

Query 27043 Hit 1

MS/MS Fragmentation of **DVINVFHHLR**

Found in **sp|Q9UK58|CCNL1\_HUMAN**, Cyclin-L1 OS=Homo sapiens GN=CCNL1 PE=1 SV=1

Match to Query 27043: 1392.782from(465.2679,3+)

Title: Sum of 2 scans in range 1229 (rt=36.361, f=4, i=295) to 1230 (rt=36.3864, f=4, i=296)

[D:\lab212\membrane\GraceJoyce\iTRAQ\_51\_2.raw]

Data File: Submitted from 20120508-1(merge) by Mascot Daemon on JOYCE-VAIO

Monoisotopic mass of neutral peptide Mr(calc): 1392.782

Variable modifications:

Ions Score: 47.02 Expect: 0.016

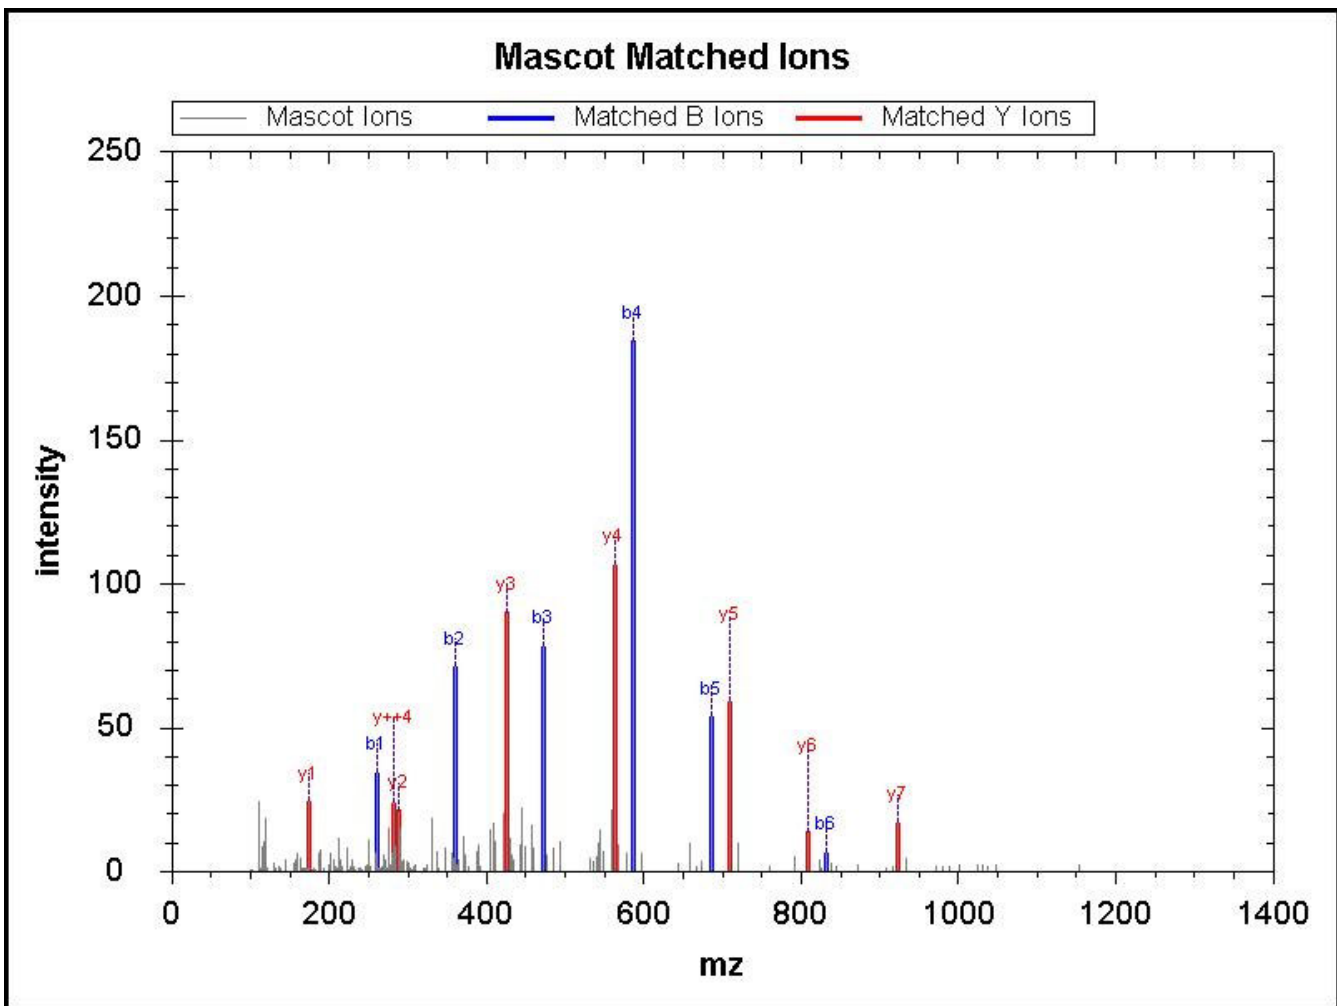

| No | b        | b++    | b*       | b*++   | b0       | b0++   | Seq | y        | y++    | y*       | y*++   | RevNo |
|----|----------|--------|----------|--------|----------|--------|-----|----------|--------|----------|--------|-------|
| 1  | 260.14   | 130.57 |          |        | 242.13   | 121.57 | D   |          |        |          |        | 10    |
| 2  | 359.20   | 180.11 |          |        | 341.19   | 171.10 | V   | 1,134.65 | 567.83 | 1,117.63 | 559.32 | 9     |
| 3  | 472.29   | 236.65 |          |        | 454.28   | 227.64 | I   | 1,035.58 | 518.30 | 1,018.56 | 509.78 | 8     |
| 4  | 586.33   | 293.67 | 569.31   | 285.16 | 568.32   | 284.66 | N   | 922.50   | 461.75 | 905.47   | 453.24 | 7     |
| 5  | 685.40   | 343.20 | 668.37   | 334.69 | 667.39   | 334.20 | V   | 808.46   | 404.73 | 791.43   | 396.22 | 6     |
| 6  | 832.47   | 416.74 | 815.44   | 408.22 | 814.46   | 407.73 | F   | 709.39   | 355.20 | 692.36   | 346.68 | 5     |
| 7  | 969.53   | 485.27 | 952.50   | 476.75 | 951.52   | 476.26 | H   | 562.32   | 281.66 | 545.29   | 273.15 | 4     |
| 8  | 1,106.59 | 553.80 | 1,089.56 | 545.28 | 1,088.58 | 544.79 | H   | 425.26   | 213.13 | 408.24   | 204.62 | 3     |

|    |          |        |          |        |          |        |   |        |        |        |        |   |
|----|----------|--------|----------|--------|----------|--------|---|--------|--------|--------|--------|---|
| 9  | 1,219.67 | 610.34 | 1,202.64 | 601.83 | 1,201.66 | 601.33 | L | 288.20 | 144.61 | 271.18 | 136.09 | 2 |
| 10 |          |        |          |        |          |        | R | 175.12 | 88.06  | 158.09 | 79.55  | 1 |

Query 38173 Hit 1

MS/MS Fragmentation of **KEDFSEATLK**

Found in **sp|Q53FA7|QORX\_HUMAN**, Quinone oxidoreductase PIG3 OS=Homo sapiens GN=TP53I3 PE=1 SV=2

Match to Query 38173: 1598.893from(533.9717,3+)

Title: 264: Sum of 2 scans in range 732 (rt=25.6894, f=4, i=171) to 733 (rt=25.7148, f=4, i=172)

[D:\lab212\membrane\Grace\Joyce\iTRAQ\_48\_2.raw]

Data File: Submitted from 20120508-1(merge) by Mascot Daemon on JOYCE-VAIO

Monoisotopic mass of neutral peptide Mr(calc): 1598.893

Variable modifications:

K1 iTRAQ4plex (K)

K10 iTRAQ4plex (K)

Ions Score: 46.98 Expect: 0.014

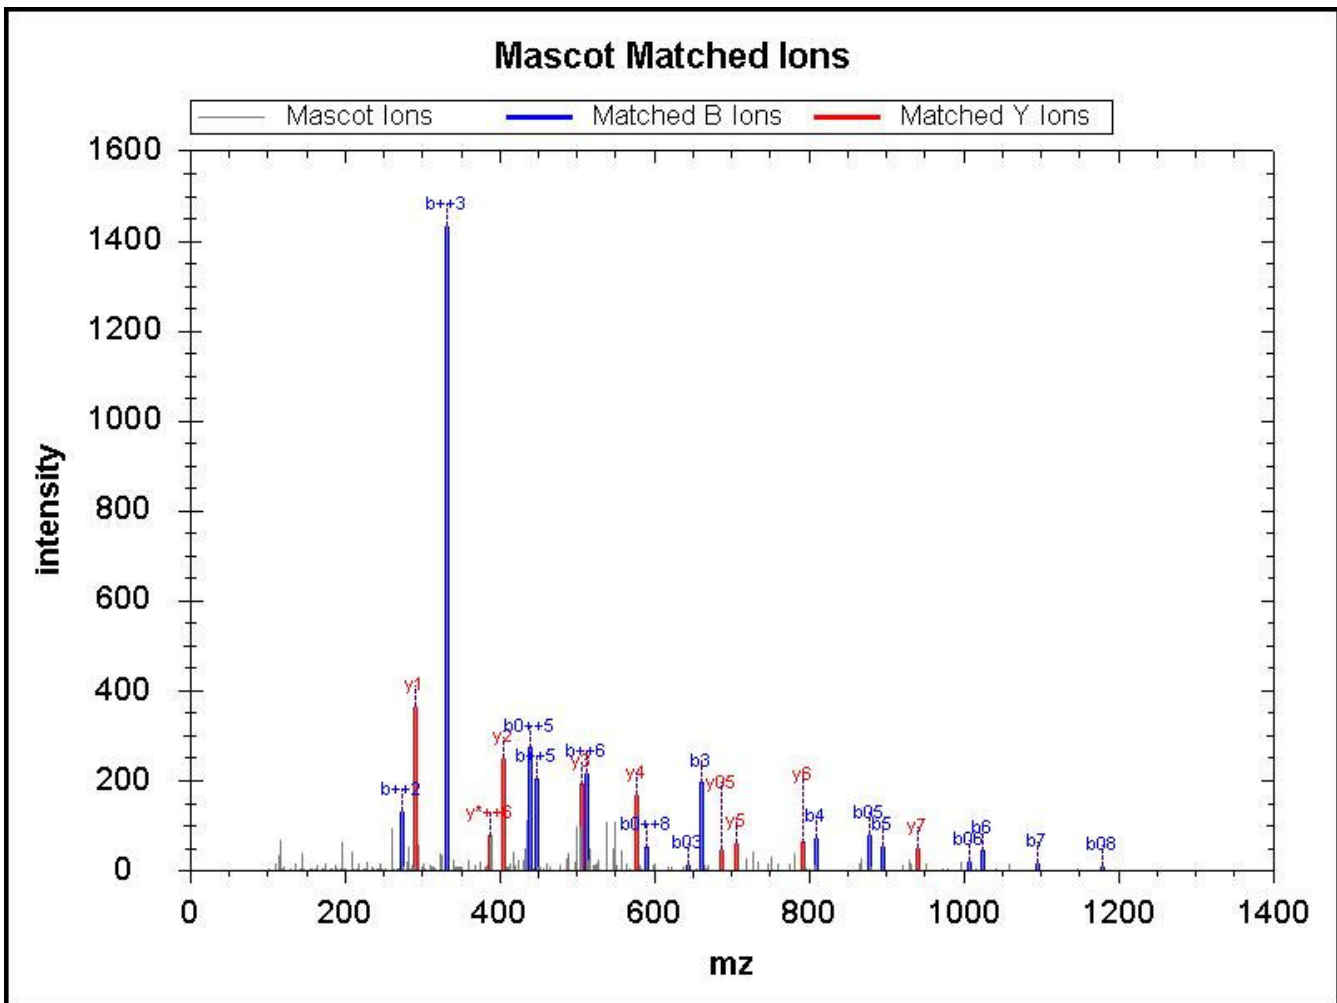

| No | b        | b++    | b*       | b*++   | b0       | b0++   | Seq | y        | y++    | y*       | y*++   | y0       | y0++   | RevNo |
|----|----------|--------|----------|--------|----------|--------|-----|----------|--------|----------|--------|----------|--------|-------|
| 1  | 417.31   | 209.16 | 400.28   | 200.64 |          |        | K   |          |        |          |        |          |        | 10    |
| 2  | 546.35   | 273.68 | 529.32   | 265.16 | 528.34   | 264.67 | E   | 1,183.60 | 592.30 | 1,166.57 | 583.79 | 1,165.59 | 583.30 | 9     |
| 3  | 661.38   | 331.19 | 644.35   | 322.68 | 643.37   | 322.19 | D   | 1,054.55 | 527.78 | 1,037.53 | 519.27 | 1,036.54 | 518.78 | 8     |
| 4  | 808.44   | 404.73 | 791.42   | 396.21 | 790.43   | 395.72 | F   | 939.53   | 470.27 | 922.50   | 461.75 | 921.52   | 461.26 | 7     |
| 5  | 895.48   | 448.24 | 878.45   | 439.73 | 877.47   | 439.24 | S   | 792.46   | 396.73 | 775.43   | 388.22 | 774.45   | 387.73 | 6     |
| 6  | 1,024.52 | 512.76 | 1,007.49 | 504.25 | 1,006.51 | 503.76 | E   | 705.43   | 353.22 | 688.40   | 344.70 | 687.42   | 344.21 | 5     |
| 7  | 1,095.56 | 548.28 | 1,078.53 | 539.77 | 1,077.55 | 539.28 | A   | 576.38   | 288.70 | 559.36   | 280.18 | 558.37   | 279.69 | 4     |
| 8  | 1,196.60 | 598.81 | 1,179.58 | 590.29 | 1,178.59 | 589.80 | T   | 505.35   | 253.18 | 488.32   | 244.66 | 487.34   | 244.17 | 3     |
| 9  | 1,309.69 | 655.35 | 1,292.66 | 646.83 | 1,291.68 | 646.34 | L   | 404.30   | 202.65 | 387.27   | 194.14 |          |        | 2     |
| 10 |          |        |          |        |          |        | K   | 291.21   | 146.11 | 274.19   | 137.60 |          |        | 1     |

Query 66530 Hit 1

MS/MS Fragmentation of **TWITNSPMADLFVVWAR**

Found in **sp|Q92947|GCDH\_HUMAN**, Glutaryl-CoA dehydrogenase

Match to Query 66530: 2150.119from(717.7136,3+)

Title: 1266: Sum of 2 scans in range 2957 (rt=75.5663, f=4, i=826) to 2958 (rt=75.5917, f=4, i=827)

[D:\lab212\membrane\GraceJoyce\20120320\_iTRAQ\_20-1.raw]

Data File:Submitted from 20120508-1(merge) by Mascot Daemon on JOYCE-VAIO

Monoisotopic mass of neutral peptide Mr(calc): 2150.119

Variable modifications:

Ions Score: 46.83 Expect: 0.019

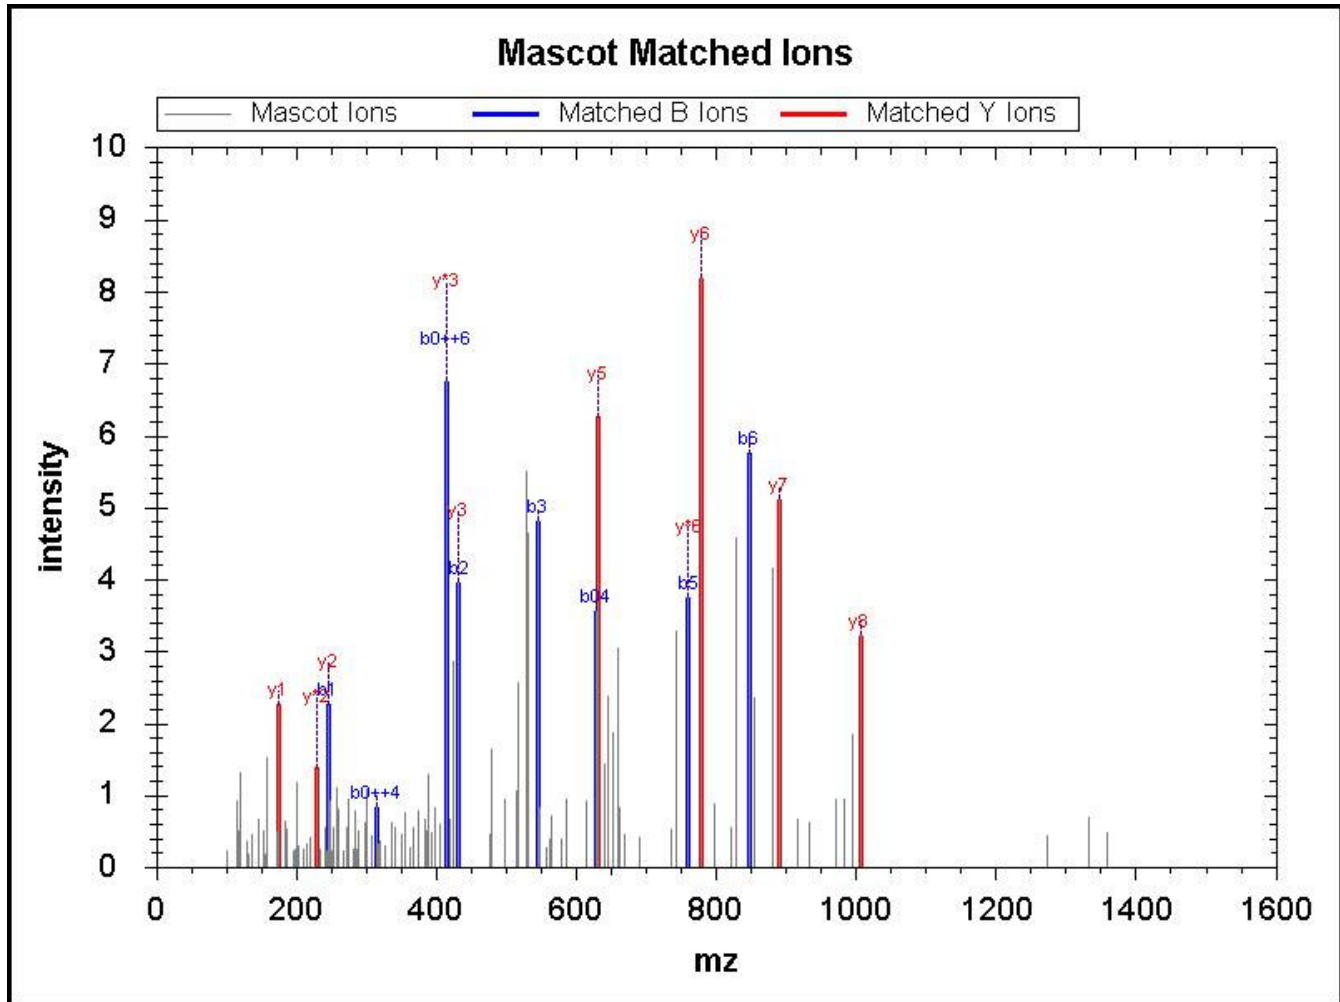

| No | b        | b++    | b*       | b*++   | b0       | b0++   | Seq | y        | y++    | y*       | y*++   | y0       | y0++   | RevNo |
|----|----------|--------|----------|--------|----------|--------|-----|----------|--------|----------|--------|----------|--------|-------|
| 1  | 246.16   | 123.58 |          |        | 228.15   | 114.58 | T   |          |        |          |        |          |        | 17    |
| 2  | 432.24   | 216.62 |          |        | 414.23   | 207.62 | W   | 1,905.97 | 953.49 | 1,888.94 | 944.97 | 1,887.96 | 944.48 | 16    |
| 3  | 545.32   | 273.16 |          |        | 527.31   | 264.16 | I   | 1,719.89 | 860.45 | 1,702.86 | 851.93 | 1,701.88 | 851.44 | 15    |
| 4  | 646.37   | 323.69 |          |        | 628.36   | 314.68 | T   | 1,606.80 | 803.91 | 1,589.78 | 795.39 | 1,588.79 | 794.90 | 14    |
| 5  | 760.41   | 380.71 | 743.38   | 372.20 | 742.40   | 371.70 | N   | 1,505.76 | 753.38 | 1,488.73 | 744.87 | 1,487.75 | 744.38 | 13    |
| 6  | 847.44   | 424.23 | 830.42   | 415.71 | 829.43   | 415.22 | S   | 1,391.71 | 696.36 | 1,374.69 | 687.85 | 1,373.70 | 687.36 | 12    |
| 7  | 944.50   | 472.75 | 927.47   | 464.24 | 926.49   | 463.75 | P   | 1,304.68 | 652.84 | 1,287.66 | 644.33 | 1,286.67 | 643.84 | 11    |
| 8  | 1,075.54 | 538.27 | 1,058.51 | 529.76 | 1,057.53 | 529.27 | M   | 1,207.63 | 604.32 | 1,190.60 | 595.81 | 1,189.62 | 595.31 | 10    |
| 9  | 1,146.57 | 573.79 | 1,129.55 | 565.28 | 1,128.56 | 564.79 | A   | 1,076.59 | 538.80 | 1,059.56 | 530.28 | 1,058.58 | 529.79 | 9     |
| 10 | 1,261.60 | 631.30 | 1,244.57 | 622.79 | 1,243.59 | 622.30 | D   | 1,005.55 | 503.28 | 988.53   | 494.77 | 987.54   | 494.27 | 8     |
| 11 | 1,374.68 | 687.85 | 1,357.66 | 679.33 | 1,356.67 | 678.84 | L   | 890.52   | 445.77 | 873.50   | 437.25 |          |        | 7     |
| 12 | 1,521.75 | 761.38 | 1,504.73 | 752.87 | 1,503.74 | 752.37 | F   | 777.44   | 389.22 | 760.41   | 380.71 |          |        | 6     |
| 13 | 1,620.82 | 810.91 | 1,603.79 | 802.40 | 1,602.81 | 801.91 | V   | 630.37   | 315.69 | 613.35   | 307.18 |          |        | 5     |
| 14 | 1,719.89 | 860.45 | 1,702.86 | 851.94 | 1,701.88 | 851.44 | V   | 531.30   | 266.16 | 514.28   | 257.64 |          |        | 4     |

|    |          |        |          |        |          |        |   |        |        |        |        |  |  |   |
|----|----------|--------|----------|--------|----------|--------|---|--------|--------|--------|--------|--|--|---|
| 15 | 1,905.97 | 953.49 | 1,888.94 | 944.97 | 1,887.96 | 944.48 | W | 432.24 | 216.62 | 415.21 | 208.11 |  |  | 3 |
| 16 | 1,977.01 | 989.01 | 1,959.98 | 980.49 | 1,959.00 | 980.00 | A | 246.16 | 123.58 | 229.13 | 115.07 |  |  | 2 |
| 17 |          |        |          |        |          |        | R | 175.12 | 88.06  | 158.09 | 79.55  |  |  | 1 |

Query 22644 Hit 1

MS/MS Fragmentation of **DTDSSVASEVR**

Found in **sp|Q86X29|LSR\_HUMAN**, Lipolysis-stimulated lipoprotein receptor OS=Homo sapiens GN=LSR PE=1 SV=4

Match to Query 22644: 1308.619from(655.3168,2+)

Title: 107: Scan 450 (rt=19.2209, f=3, i=56) [D:\lab212\membrane\Grace\Joyce\iTRAQ\_22\_1.raw]

Data File: Submitted from 20120508-1(merge) by Mascot Daemon on JOYCE-VAIO

Monoisotopic mass of neutral peptide Mr(calc): 1308.619

Variable modifications:

Ions Score: 46.75 Expect: 0.013

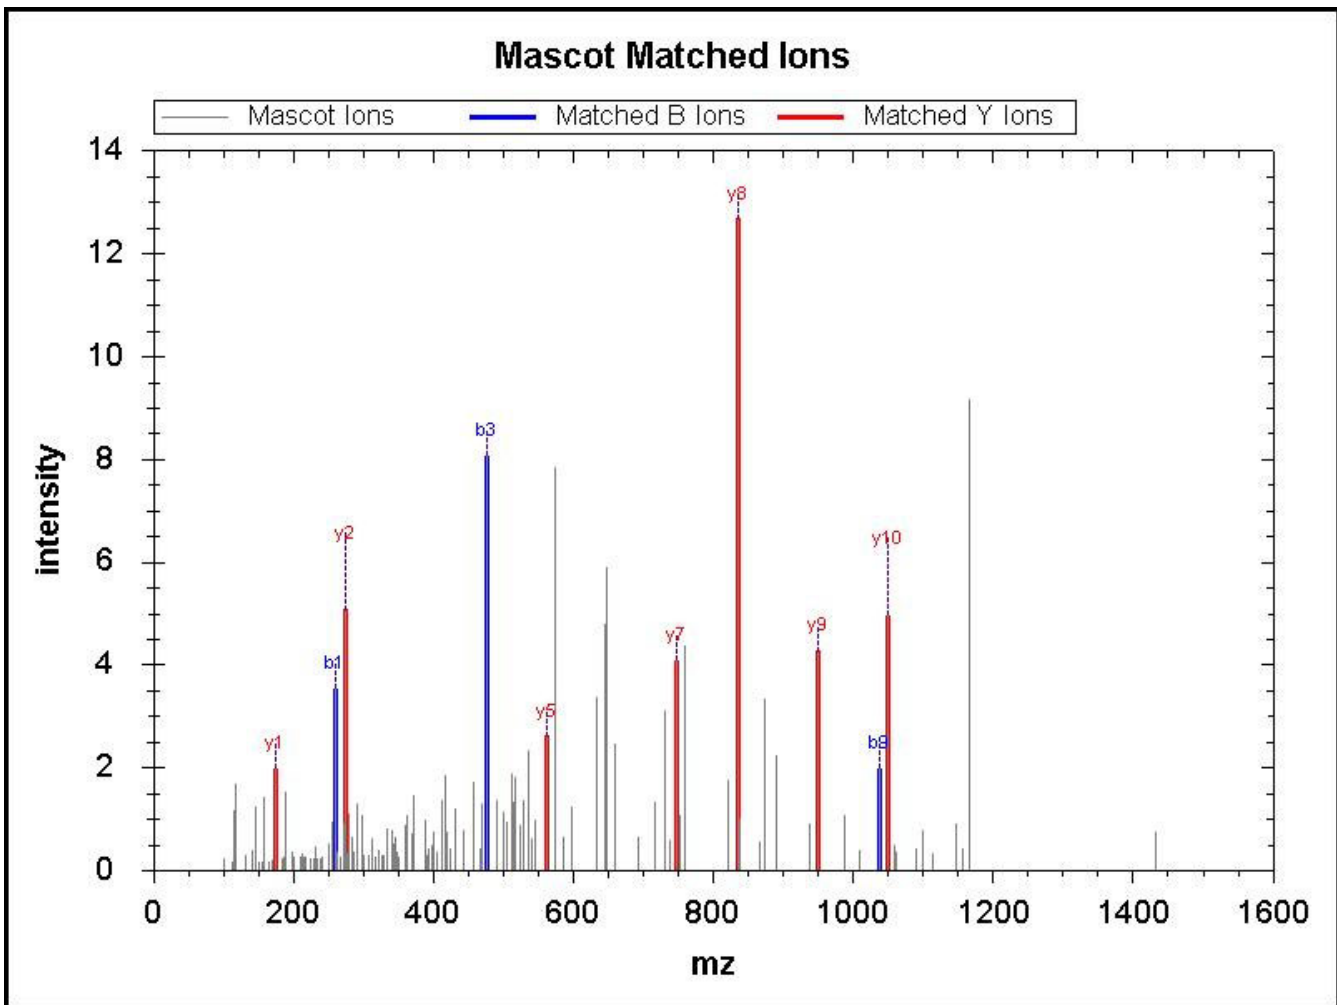

| No | b        | b++    | b0       | b0++   | Seq | y        | y++    | y*       | y*++   | y0       | y0++   | RevNo |
|----|----------|--------|----------|--------|-----|----------|--------|----------|--------|----------|--------|-------|
| 1  | 260.14   | 130.57 | 242.13   | 121.57 | D   |          |        |          |        |          |        | 11    |
| 2  | 361.18   | 181.10 | 343.17   | 172.09 | T   | 1,050.51 | 525.76 | 1,033.48 | 517.24 | 1,032.50 | 516.75 | 10    |
| 3  | 476.21   | 238.61 | 458.20   | 229.60 | D   | 949.46   | 475.23 | 932.43   | 466.72 | 931.45   | 466.23 | 9     |
| 4  | 563.24   | 282.13 | 545.23   | 273.12 | S   | 834.43   | 417.72 | 817.41   | 409.21 | 816.42   | 408.71 | 8     |
| 5  | 650.27   | 325.64 | 632.26   | 316.64 | S   | 747.40   | 374.20 | 730.37   | 365.69 | 729.39   | 365.20 | 7     |
| 6  | 749.34   | 375.18 | 731.33   | 366.17 | V   | 660.37   | 330.69 | 643.34   | 322.17 | 642.36   | 321.68 | 6     |
| 7  | 820.38   | 410.69 | 802.37   | 401.69 | A   | 561.30   | 281.15 | 544.27   | 272.64 | 543.29   | 272.15 | 5     |
| 8  | 907.41   | 454.21 | 889.40   | 445.20 | S   | 490.26   | 245.63 | 473.24   | 237.12 | 472.25   | 236.63 | 4     |
| 9  | 1,036.46 | 518.73 | 1,018.44 | 509.73 | E   | 403.23   | 202.12 | 386.20   | 193.61 | 385.22   | 193.11 | 3     |
| 10 | 1,135.52 | 568.27 | 1,117.51 | 559.26 | V   | 274.19   | 137.60 | 257.16   | 129.08 |          |        | 2     |
| 11 |          |        |          |        | R   | 175.12   | 88.06  | 158.09   | 79.55  |          |        | 1     |

Query 52734 Hit 1

MS/MS Fragmentation of **DLLVEGLAEILHQK**

Found in **sp|Q9Y3R5|DOP2\_HUMAN**, Protein dopey-2 OS=Homo sapiens GN=DOPEY2 PE=1 SV=5

Match to Query 52734: 1865.085from(622.7023,3+)

Title: 1103: Sum of 2 scans in range 2417 (rt=63.8596, f=3, i=378) to 2418 (rt=63.885, f=3, i=379)

[D:\lab212\membrane\Grace\Joyce\iTRAQ\_37\_1.raw]

Data File: Submitted from 20120508-1(merge) by Mascot Daemon on JOYCE-VAIO

Monoisotopic mass of neutral peptide Mr(calc): 1865.085

Variable modifications:

K14 iTRAQ4plex (K)

Ions Score: 46.74 Expect: 0.010

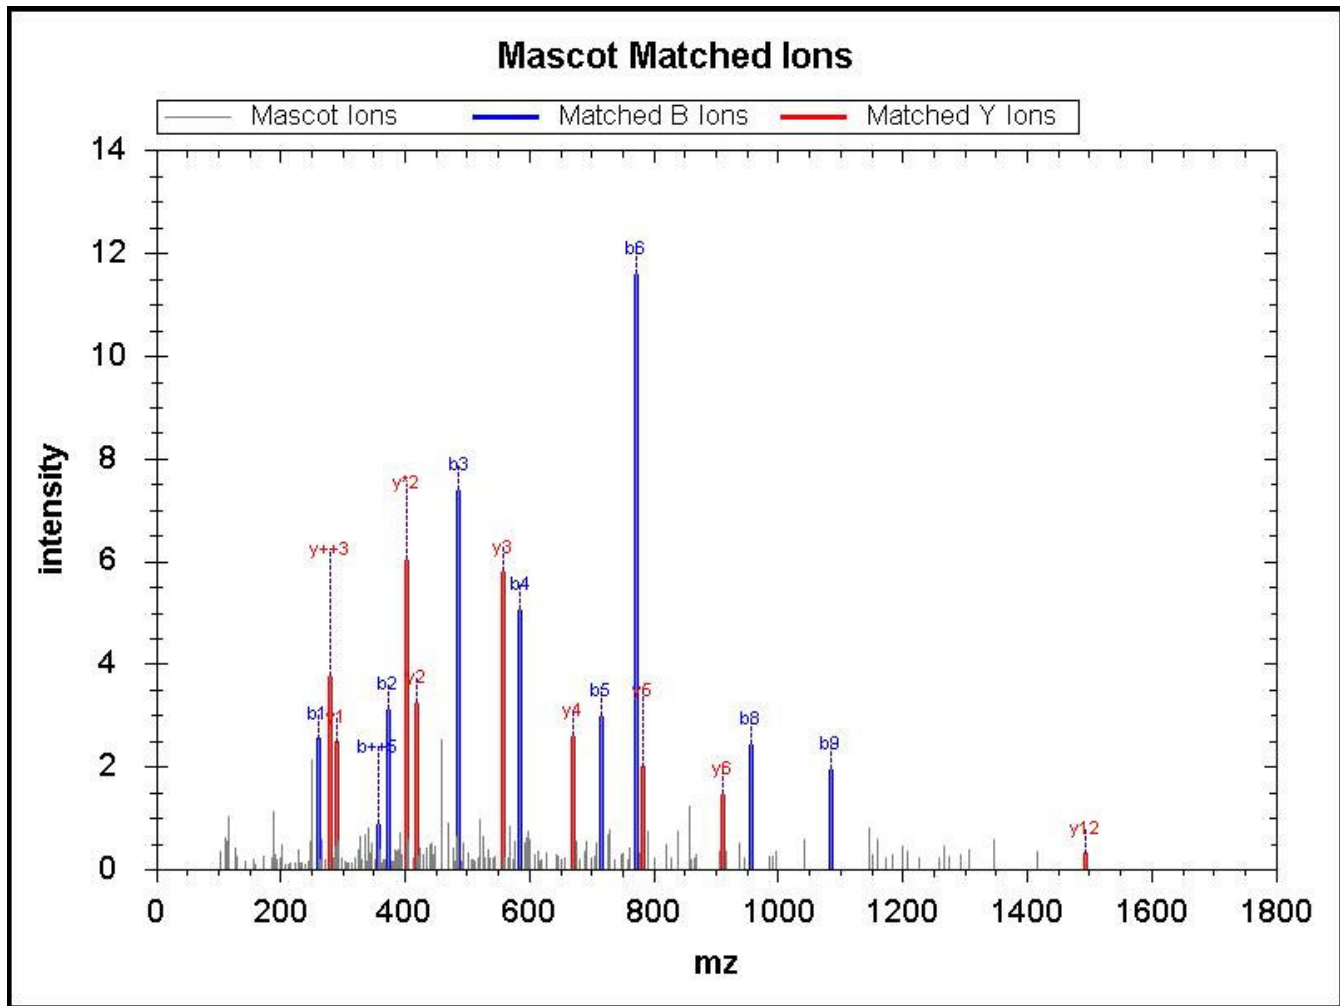

| No | b        | b++    | b*       | b*++   | b0       | b0++   | Seq | y        | y++    | y*       | y*++   | y0       | y0++   | RevNo |
|----|----------|--------|----------|--------|----------|--------|-----|----------|--------|----------|--------|----------|--------|-------|
| 1  | 260.14   | 130.57 |          |        | 242.13   | 121.57 | D   |          |        |          |        |          |        | 14    |
| 2  | 373.22   | 187.11 |          |        | 355.21   | 178.11 | L   | 1,606.96 | 803.99 | 1,589.94 | 795.47 | 1,588.95 | 794.98 | 13    |
| 3  | 486.30   | 243.66 |          |        | 468.29   | 234.65 | L   | 1,493.88 | 747.44 | 1,476.85 | 738.93 | 1,475.87 | 738.44 | 12    |
| 4  | 585.37   | 293.19 |          |        | 567.36   | 284.18 | V   | 1,380.80 | 690.90 | 1,363.77 | 682.39 | 1,362.79 | 681.90 | 11    |
| 5  | 714.42   | 357.71 |          |        | 696.40   | 348.71 | E   | 1,281.73 | 641.37 | 1,264.70 | 632.85 | 1,263.72 | 632.36 | 10    |
| 6  | 771.44   | 386.22 |          |        | 753.43   | 377.22 | G   | 1,152.69 | 576.85 | 1,135.66 | 568.33 | 1,134.68 | 567.84 | 9     |
| 7  | 884.52   | 442.76 |          |        | 866.51   | 433.76 | L   | 1,095.66 | 548.34 | 1,078.64 | 539.82 | 1,077.65 | 539.33 | 8     |
| 8  | 955.56   | 478.28 |          |        | 937.55   | 469.28 | A   | 982.58   | 491.79 | 965.55   | 483.28 | 964.57   | 482.79 | 7     |
| 9  | 1,084.60 | 542.80 |          |        | 1,066.59 | 533.80 | E   | 911.54   | 456.28 | 894.52   | 447.76 | 893.53   | 447.27 | 6     |
| 10 | 1,197.68 | 599.35 |          |        | 1,179.67 | 590.34 | I   | 782.50   | 391.75 | 765.47   | 383.24 |          |        | 5     |
| 11 | 1,310.77 | 655.89 |          |        | 1,292.76 | 646.88 | L   | 669.42   | 335.21 | 652.39   | 326.70 |          |        | 4     |
| 12 | 1,447.83 | 724.42 |          |        | 1,429.82 | 715.41 | H   | 556.33   | 278.67 | 539.31   | 270.16 |          |        | 3     |
| 13 | 1,575.89 | 788.45 | 1,558.86 | 779.93 | 1,557.88 | 779.44 | Q   | 419.27   | 210.14 | 402.25   | 201.63 |          |        | 2     |

Query 43479 Hit 1

MS/MS Fragmentation of **AALEAQNALHNMK**

Found in **sp|Q92879|CELFI\_HUMAN**, CUGBP Elav-like family member 1 OS=Homo sapiens GN=CELFI PE=1 SV=2

Match to Query 43479: 1697.91 from (566.9772,3+)

Title: 416: Scan 953 (rt=31.2394, f=3, i=148) [D:\lab212\membrane\Grace\Joyce\iTRAQ\_42\_2.raw]

Data File: Submitted from 20120508-1(merge) by Mascot Daemon on JOYCE-VAIO

Monoisotopic mass of neutral peptide Mr(calc): 1697.91

Variable modifications:

K13 iTRAQ4plex (K)

Ions Score: 46.7 Expect: 0.017

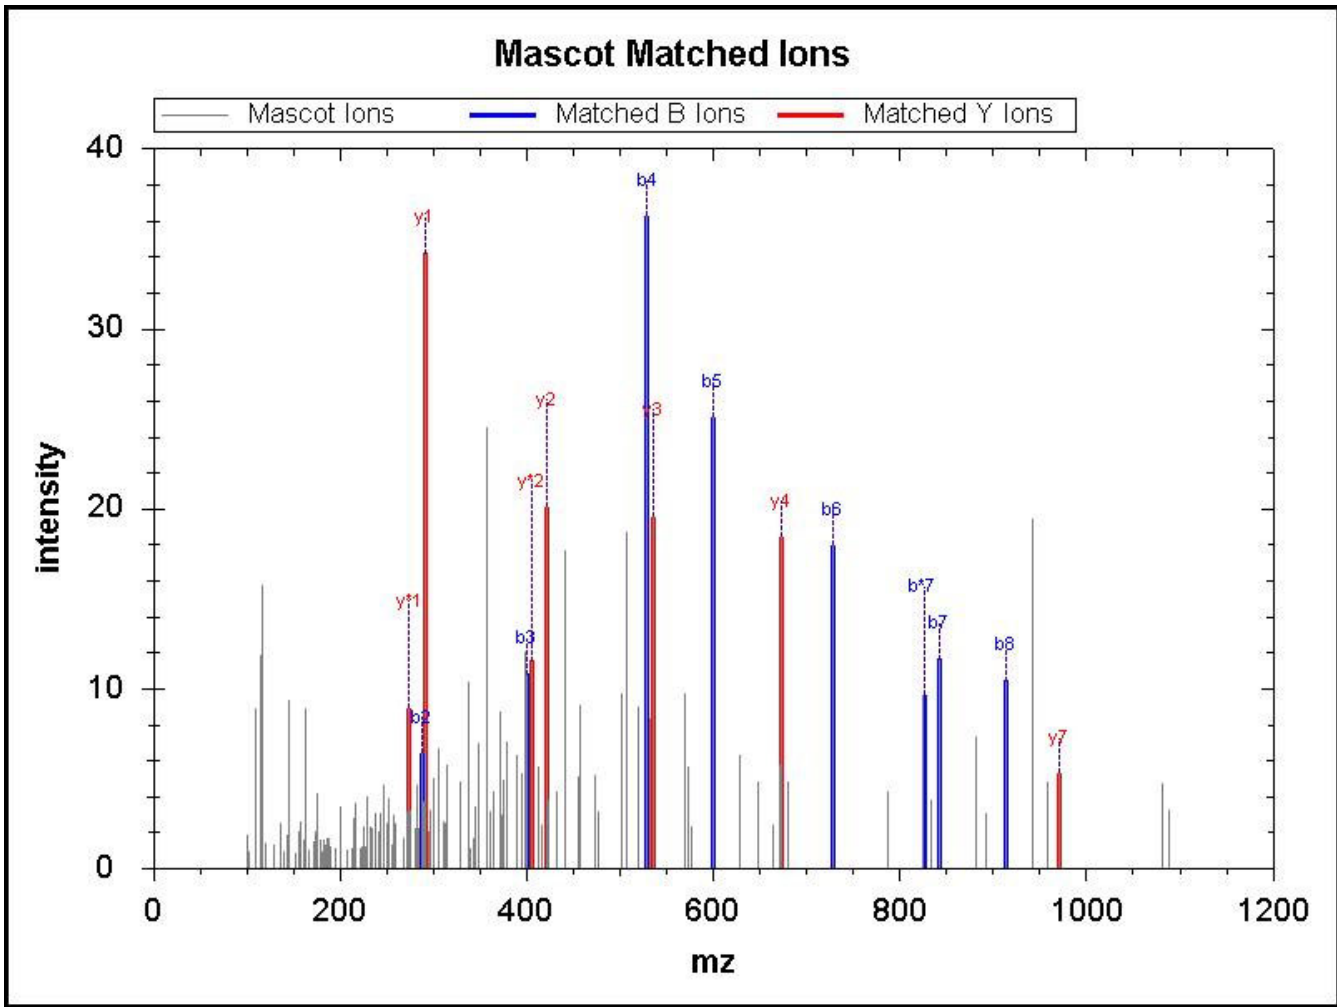

| No | b        | b++    | b*       | b*++   | b0       | b0++   | Seq | y        | y++    | y*       | y*++   | y0       | y0++   | RevNo |
|----|----------|--------|----------|--------|----------|--------|-----|----------|--------|----------|--------|----------|--------|-------|
| 1  | 216.15   | 108.58 |          |        |          |        | A   |          |        |          |        |          |        | 13    |
| 2  | 287.18   | 144.10 |          |        |          |        | A   | 1,483.78 | 742.39 | 1,466.75 | 733.88 | 1,465.77 | 733.39 | 12    |
| 3  | 400.27   | 200.64 |          |        |          |        | L   | 1,412.74 | 706.88 | 1,395.72 | 698.36 | 1,394.73 | 697.87 | 11    |
| 4  | 529.31   | 265.16 |          |        | 511.30   | 256.15 | E   | 1,299.66 | 650.33 | 1,282.63 | 641.82 | 1,281.65 | 641.33 | 10    |
| 5  | 600.35   | 300.68 |          |        | 582.34   | 291.67 | A   | 1,170.62 | 585.81 | 1,153.59 | 577.30 |          |        | 9     |
| 6  | 728.41   | 364.71 | 711.38   | 356.19 | 710.40   | 355.70 | Q   | 1,099.58 | 550.29 | 1,082.55 | 541.78 |          |        | 8     |
| 7  | 842.45   | 421.73 | 825.42   | 413.21 | 824.44   | 412.72 | N   | 971.52   | 486.26 | 954.49   | 477.75 |          |        | 7     |
| 8  | 913.49   | 457.25 | 896.46   | 448.73 | 895.48   | 448.24 | A   | 857.48   | 429.24 | 840.45   | 420.73 |          |        | 6     |
| 9  | 1,026.57 | 513.79 | 1,009.54 | 505.28 | 1,008.56 | 504.78 | L   | 786.44   | 393.72 | 769.41   | 385.21 |          |        | 5     |
| 10 | 1,163.63 | 582.32 | 1,146.60 | 573.80 | 1,145.62 | 573.31 | H   | 673.36   | 337.18 | 656.33   | 328.67 |          |        | 4     |
| 11 | 1,277.67 | 639.34 | 1,260.65 | 630.83 | 1,259.66 | 630.33 | N   | 536.30   | 268.65 | 519.27   | 260.14 |          |        | 3     |
| 12 | 1,408.71 | 704.86 | 1,391.69 | 696.35 | 1,390.70 | 695.85 | M   | 422.26   | 211.63 | 405.23   | 203.12 |          |        | 2     |
| 13 |          |        |          |        |          |        | K   | 291.21   | 146.11 | 274.19   | 137.60 |          |        | 1     |

Query 33779 Hit 1

MS/MS Fragmentation of **QVPDTSVQETDR**

Found in **sp|Q5J8M3|TMM85\_HUMAN**, Transmembrane protein 85 OS=Homo sapiens GN=TMEM85 PE=1 SV=2

Match to Query 33779: 1517.739from(759.8768,2+)

Title: 86: Sum of 2 scans in range 494 (rt=19.5161, f=4, i=41) to 495 (rt=19.5415, f=4, i=42)

[D:\lab212\membrane\GraceJoyce\iTRAQ\_23\_2.raw]

Data File:Submitted from 20120508-1(merge) by Mascot Daemon on JOYCE-VAIO

Monoisotopic mass of neutral peptide Mr(calc): 1517.739

Variable modifications:

Ions Score: 46.57 Expect: 0.016

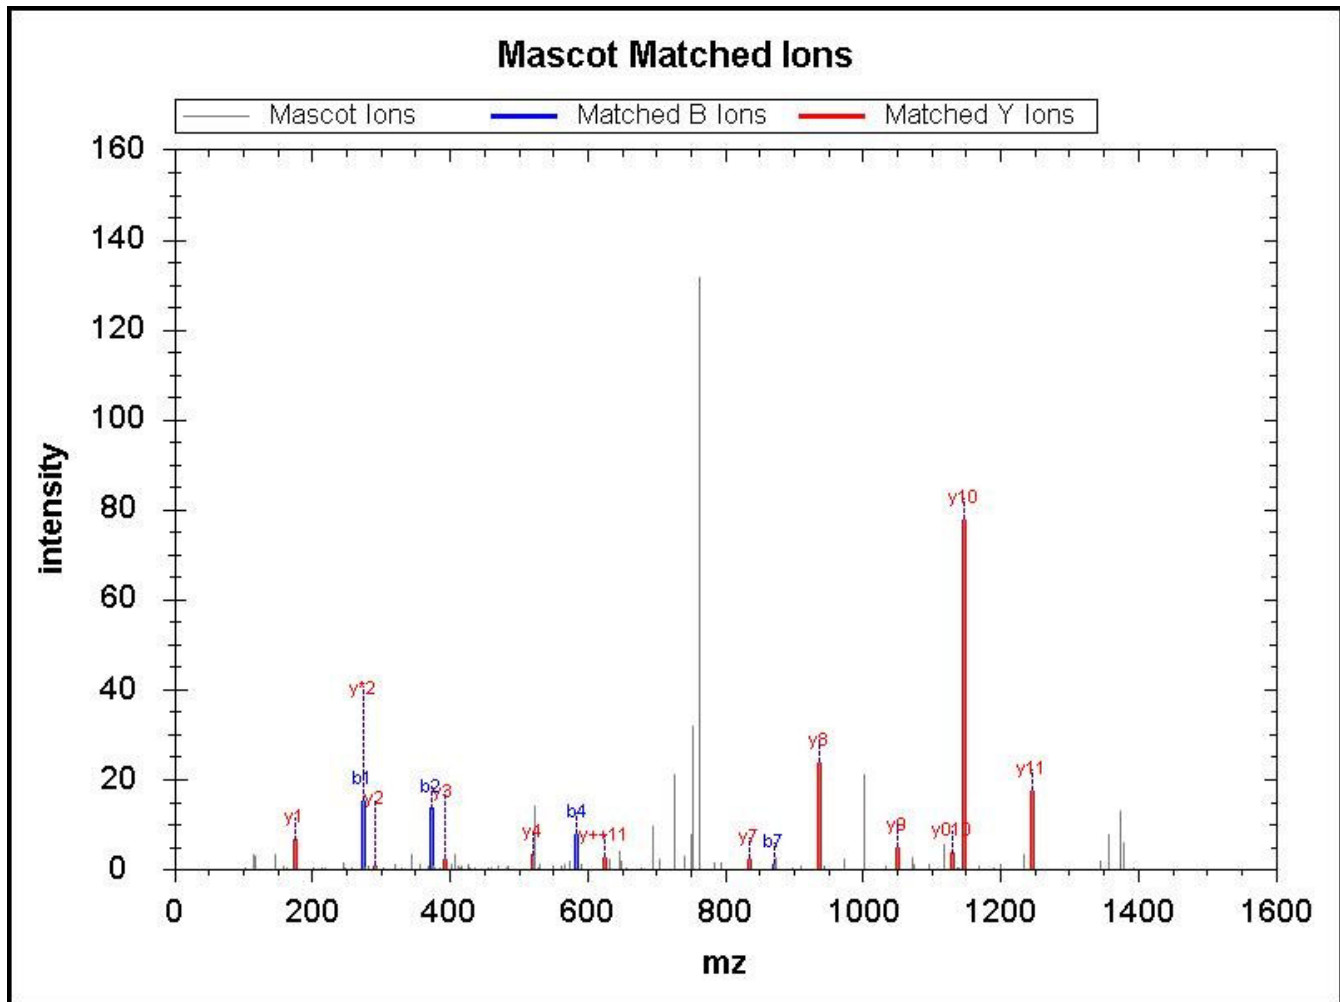

| No | b        | b++    | b*       | b*++   | b0       | b0++   | Seq | y        | y++    | y*       | y*++   | y0       | y0++   | RevNo |
|----|----------|--------|----------|--------|----------|--------|-----|----------|--------|----------|--------|----------|--------|-------|
| 1  | 273.17   | 137.09 | 256.14   | 128.57 |          |        | Q   |          |        |          |        |          |        | 12    |
| 2  | 372.24   | 186.62 | 355.21   | 178.11 |          |        | V   | 1,246.59 | 623.80 | 1,229.56 | 615.29 | 1,228.58 | 614.79 | 11    |
| 3  | 469.29   | 235.15 | 452.26   | 226.63 |          |        | P   | 1,147.52 | 574.26 | 1,130.50 | 565.75 | 1,129.51 | 565.26 | 10    |
| 4  | 584.32   | 292.66 | 567.29   | 284.15 | 566.31   | 283.66 | D   | 1,050.47 | 525.74 | 1,033.44 | 517.23 | 1,032.46 | 516.73 | 9     |
| 5  | 685.36   | 343.19 | 668.34   | 334.67 | 667.35   | 334.18 | T   | 935.44   | 468.23 | 918.42   | 459.71 | 917.43   | 459.22 | 8     |
| 6  | 772.40   | 386.70 | 755.37   | 378.19 | 754.39   | 377.70 | S   | 834.40   | 417.70 | 817.37   | 409.19 | 816.38   | 408.70 | 7     |
| 7  | 871.46   | 436.24 | 854.44   | 427.72 | 853.45   | 427.23 | V   | 747.36   | 374.19 | 730.34   | 365.67 | 729.35   | 365.18 | 6     |
| 8  | 999.52   | 500.27 | 982.50   | 491.75 | 981.51   | 491.26 | Q   | 648.29   | 324.65 | 631.27   | 316.14 | 630.28   | 315.65 | 5     |
| 9  | 1,128.57 | 564.79 | 1,111.54 | 556.27 | 1,110.55 | 555.78 | E   | 520.24   | 260.62 | 503.21   | 252.11 | 502.23   | 251.62 | 4     |
| 10 | 1,229.61 | 615.31 | 1,212.59 | 606.80 | 1,211.60 | 606.30 | T   | 391.19   | 196.10 | 374.17   | 187.59 | 373.18   | 187.10 | 3     |
| 11 | 1,344.64 | 672.82 | 1,327.61 | 664.31 | 1,326.63 | 663.82 | D   | 290.15   | 145.58 | 273.12   | 137.06 | 272.14   | 136.57 | 2     |
| 12 |          |        |          |        |          |        | R   | 175.12   | 88.06  | 158.09   | 79.55  |          |        | 1     |

Query 82374 Hit 1

MS/MS Fragmentation of **DALHLLVFTTDDVPHIALDGK**



Found in [sp|P18084|ITB5\\_HUMAN](#), Integrin beta-5 OS=Homo sapiens GN=ITGB5 PE=1 SV=1

Match to Query 82374: 2577.407 from (645.359, 4+)

Title: 1001: Scan 2187 (rt=58.8698, f=3, i=340) [D:\lab212\membrane\Grace\Joyce\iTRAQ\_44\_2.raw]

Data File: Submitted from 20120508-1 (merge) by Mascot Daemon on JOYCE-VAIO

Monoisotopic mass of neutral peptide Mr(calc): 2577.407

Variable modifications:

K21 iTRAQ4plex (K)

Ions Score: 46.55 Expect: 0.014

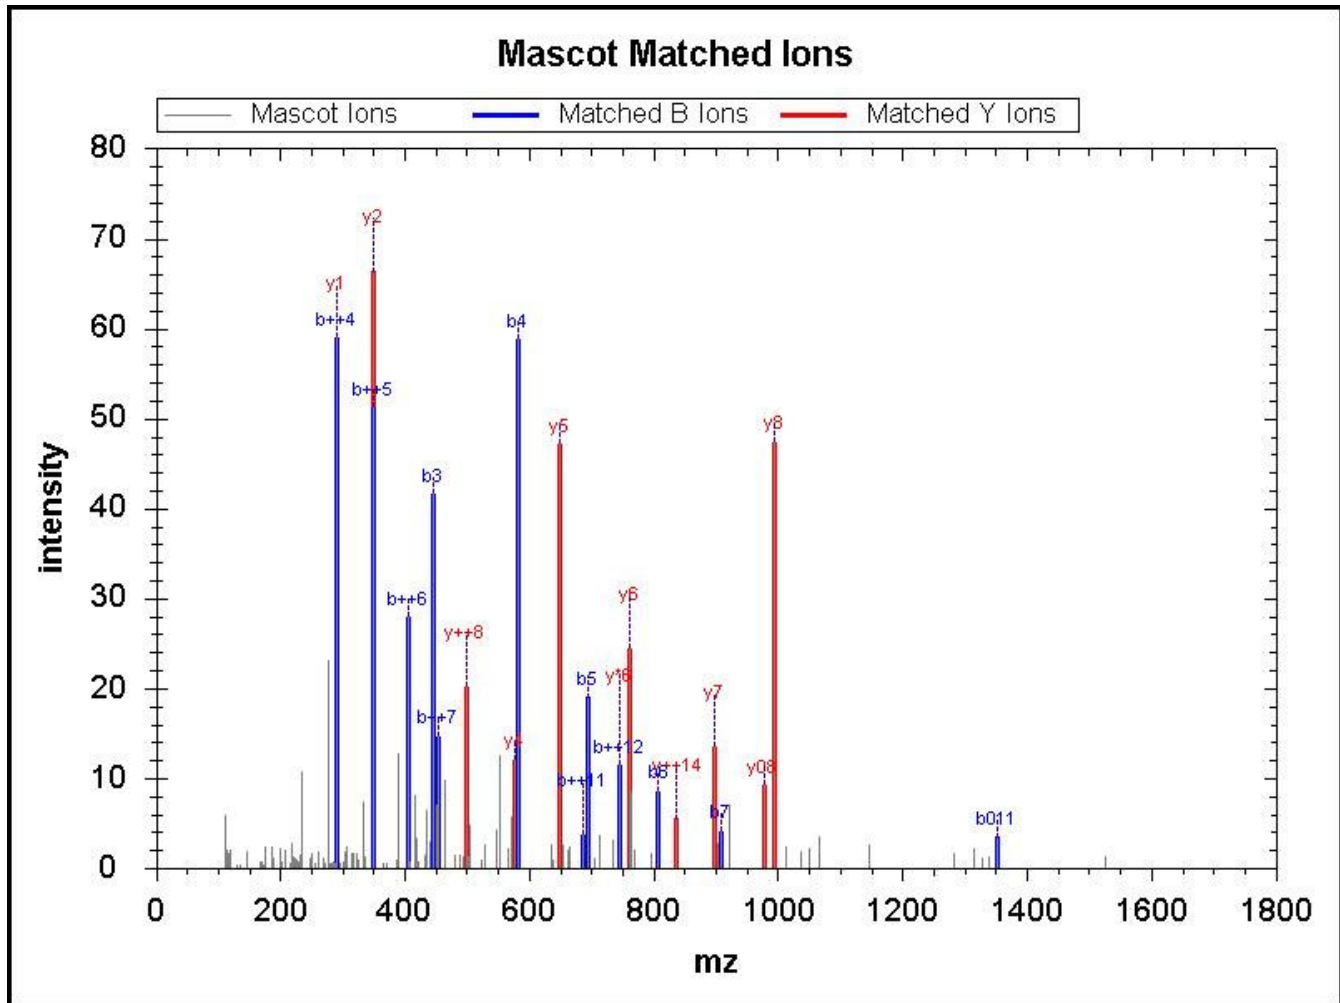

| No | b        | b++      | b0       | b0++   | Seq | y        | y++      | y*       | y*++     | y0       | y0++     | RevNo |
|----|----------|----------|----------|--------|-----|----------|----------|----------|----------|----------|----------|-------|
| 1  | 260.14   | 130.57   | 242.13   | 121.57 | D   |          |          |          |          |          |          | 21    |
| 2  | 331.17   | 166.09   | 313.16   | 157.09 | A   | 2,319.28 | 1,160.15 | 2,302.26 | 1,151.63 | 2,301.27 | 1,151.14 | 20    |
| 3  | 444.26   | 222.63   | 426.25   | 213.63 | L   | 2,248.25 | 1,124.63 | 2,231.22 | 1,116.11 | 2,230.24 | 1,115.62 | 19    |
| 4  | 581.32   | 291.16   | 563.31   | 282.16 | H   | 2,135.16 | 1,068.08 | 2,118.14 | 1,059.57 | 2,117.15 | 1,059.08 | 18    |
| 5  | 694.40   | 347.70   | 676.39   | 338.70 | L   | 1,998.10 | 999.56   | 1,981.08 | 991.04   | 1,980.09 | 990.55   | 17    |
| 6  | 807.48   | 404.25   | 789.47   | 395.24 | L   | 1,885.02 | 943.01   | 1,867.99 | 934.50   | 1,867.01 | 934.01   | 16    |
| 7  | 906.55   | 453.78   | 888.54   | 444.77 | V   | 1,771.93 | 886.47   | 1,754.91 | 877.96   | 1,753.92 | 877.47   | 15    |
| 8  | 1,053.62 | 527.31   | 1,035.61 | 518.31 | F   | 1,672.87 | 836.94   | 1,655.84 | 828.42   | 1,654.86 | 827.93   | 14    |
| 9  | 1,154.67 | 577.84   | 1,136.66 | 568.83 | T   | 1,525.80 | 763.40   | 1,508.77 | 754.89   | 1,507.79 | 754.40   | 13    |
| 10 | 1,255.72 | 628.36   | 1,237.71 | 619.36 | T   | 1,424.75 | 712.88   | 1,407.72 | 704.37   | 1,406.74 | 703.87   | 12    |
| 11 | 1,370.74 | 685.88   | 1,352.73 | 676.87 | D   | 1,323.70 | 662.35   | 1,306.68 | 653.84   | 1,305.69 | 653.35   | 11    |
| 12 | 1,485.77 | 743.39   | 1,467.76 | 734.38 | D   | 1,208.68 | 604.84   | 1,191.65 | 596.33   | 1,190.66 | 595.84   | 10    |
| 13 | 1,584.84 | 792.92   | 1,566.83 | 783.92 | V   | 1,093.65 | 547.33   | 1,076.62 | 538.81   | 1,075.64 | 538.32   | 9     |
| 14 | 1,681.89 | 841.45   | 1,663.88 | 832.44 | P   | 994.58   | 497.79   | 977.55   | 489.28   | 976.57   | 488.79   | 8     |
| 15 | 1,818.95 | 909.98   | 1,800.94 | 900.97 | H   | 897.53   | 449.27   | 880.50   | 440.75   | 879.52   | 440.26   | 7     |
| 16 | 1,932.03 | 966.52   | 1,914.02 | 957.52 | I   | 760.47   | 380.74   | 743.44   | 372.22   | 742.46   | 371.73   | 6     |
| 17 | 2,003.07 | 1,002.04 | 1,985.06 | 993.03 | A   | 647.38   | 324.20   | 630.36   | 315.68   | 629.37   | 315.19   | 5     |

|    |          |          |          |          |   |        |        |        |        |        |        |   |
|----|----------|----------|----------|----------|---|--------|--------|--------|--------|--------|--------|---|
| 18 | 2,116.16 | 1,058.58 | 2,098.15 | 1,049.58 | L | 576.35 | 288.68 | 559.32 | 280.16 | 558.34 | 279.67 | 4 |
| 19 | 2,231.18 | 1,116.10 | 2,213.17 | 1,107.09 | D | 463.26 | 232.14 | 446.24 | 223.62 | 445.25 | 223.13 | 3 |
| 20 | 2,288.20 | 1,144.61 | 2,270.19 | 1,135.60 | G | 348.24 | 174.62 | 331.21 | 166.11 |        |        | 2 |
| 21 |          |          |          |          | K | 291.21 | 146.11 | 274.19 | 137.60 |        |        | 1 |

Query 70127 Hit 1

MS/MS Fragmentation of **ETTGTGPNVYHENDTIAK**

Found in **sp|Q4G0F5|VP26B\_HUMAN**, Vacuolar protein sorting-associated protein 26B OS=Homo sapiens GN=VPS26B PE=1 SV=2

Match to Query 70127: 2234.11 from (745.7106,3+)

Title: 226: Scan 601 (rt=22.8682, f=3, i=80) [D:\lab212\membrane\Grace\Joyce\iTRAQ\_38\_1.raw]

Data File: Submitted from 20120508-1(merge) by Mascot Daemon on JOYCE-VAIO

Monoisotopic mass of neutral peptide Mr(calc): 2234.11

Variable modifications:

K18 iTRAQ4plex (K)

Ions Score: 46.51 Expect: 0.021

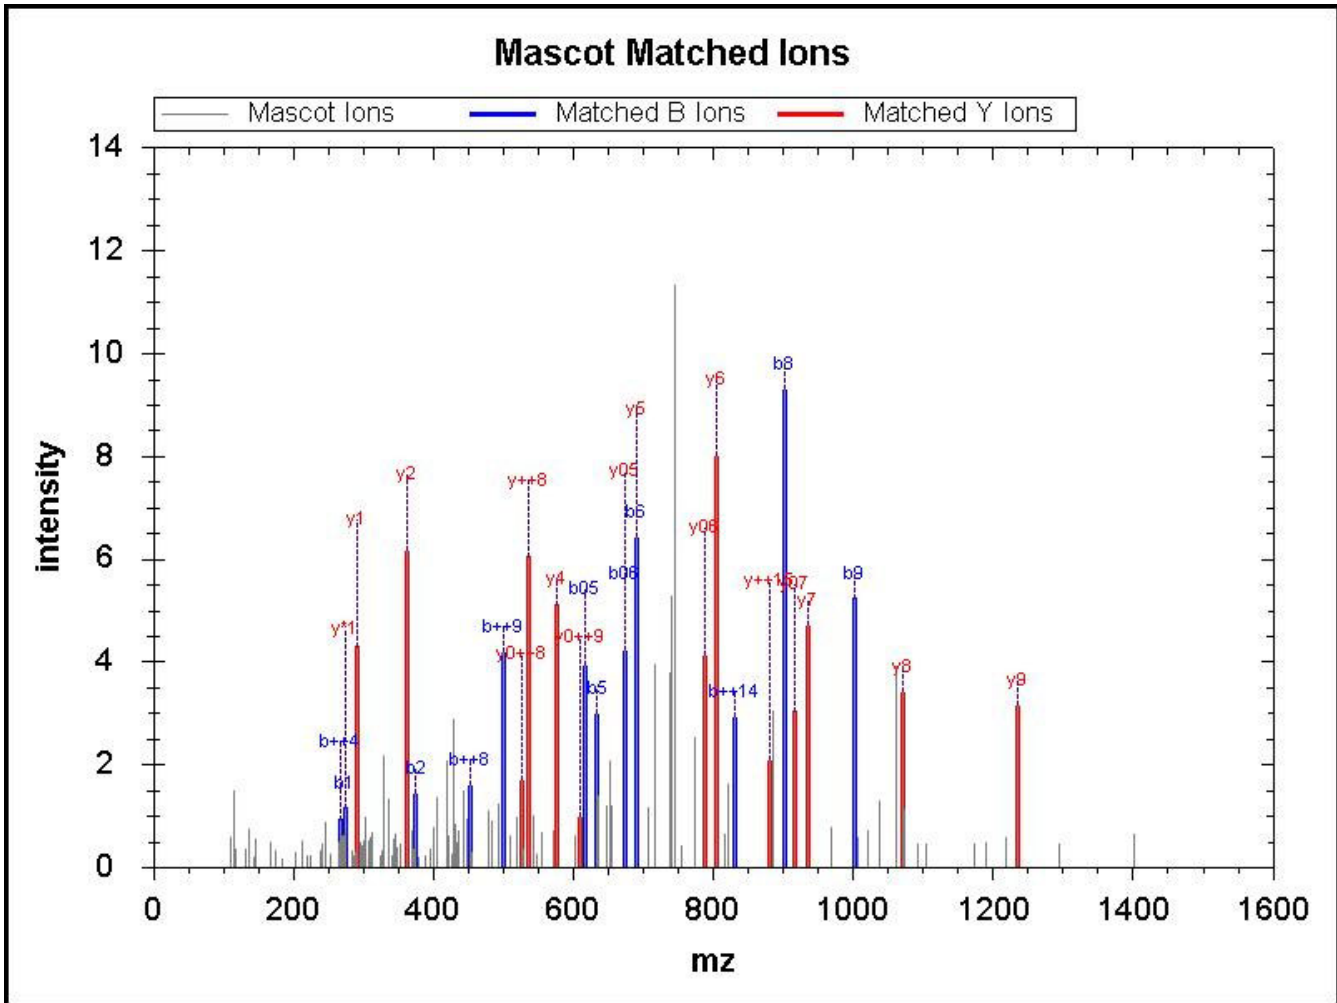

| No | b        | b++    | b*       | b*++   | b0       | b0++   | Seq | y        | y++    | y*       | y*++   | y0       | y0++   | RevNo |
|----|----------|--------|----------|--------|----------|--------|-----|----------|--------|----------|--------|----------|--------|-------|
| 1  | 274.15   | 137.58 |          |        | 256.14   | 128.57 | E   |          |        |          |        |          |        | 18    |
| 2  | 375.20   | 188.10 |          |        | 357.19   | 179.10 | T   | 1,961.97 | 981.49 | 1,944.94 | 972.97 | 1,943.96 | 972.48 | 17    |
| 3  | 476.25   | 238.63 |          |        | 458.24   | 229.62 | T   | 1,860.92 | 930.96 | 1,843.89 | 922.45 | 1,842.91 | 921.96 | 16    |
| 4  | 533.27   | 267.14 |          |        | 515.26   | 258.13 | G   | 1,759.87 | 880.44 | 1,742.85 | 871.93 | 1,741.86 | 871.43 | 15    |
| 5  | 634.32   | 317.66 |          |        | 616.31   | 308.66 | T   | 1,702.85 | 851.93 | 1,685.83 | 843.42 | 1,684.84 | 842.92 | 14    |
| 6  | 691.34   | 346.17 |          |        | 673.33   | 337.17 | G   | 1,601.80 | 801.41 | 1,584.78 | 792.89 | 1,583.79 | 792.40 | 13    |
| 7  | 788.39   | 394.70 |          |        | 770.38   | 385.69 | P   | 1,544.78 | 772.89 | 1,527.76 | 764.38 | 1,526.77 | 763.89 | 12    |
| 8  | 902.43   | 451.72 | 885.41   | 443.21 | 884.42   | 442.72 | N   | 1,447.73 | 724.37 | 1,430.70 | 715.86 | 1,429.72 | 715.36 | 11    |
| 9  | 1,001.50 | 501.25 | 984.48   | 492.74 | 983.49   | 492.25 | V   | 1,333.69 | 667.35 | 1,316.66 | 658.83 | 1,315.68 | 658.34 | 10    |
| 10 | 1,164.57 | 582.79 | 1,147.54 | 574.27 | 1,146.55 | 573.78 | Y   | 1,234.62 | 617.81 | 1,217.59 | 609.30 | 1,216.61 | 608.81 | 9     |

|    |          |        |          |        |          |        |   |          |        |          |        |          |        |   |
|----|----------|--------|----------|--------|----------|--------|---|----------|--------|----------|--------|----------|--------|---|
| 11 | 1,301.62 | 651.32 | 1,284.60 | 642.80 | 1,283.61 | 642.31 | H | 1,071.56 | 536.28 | 1,054.53 | 527.77 | 1,053.54 | 527.28 | 8 |
| 12 | 1,430.67 | 715.84 | 1,413.64 | 707.32 | 1,412.66 | 706.83 | E | 934.50   | 467.75 | 917.47   | 459.24 | 916.49   | 458.75 | 7 |
| 13 | 1,544.71 | 772.86 | 1,527.68 | 764.35 | 1,526.70 | 763.85 | N | 805.45   | 403.23 | 788.43   | 394.72 | 787.44   | 394.23 | 6 |
| 14 | 1,659.74 | 830.37 | 1,642.71 | 821.86 | 1,641.73 | 821.37 | D | 691.41   | 346.21 | 674.38   | 337.70 | 673.40   | 337.20 | 5 |
| 15 | 1,760.78 | 880.90 | 1,743.76 | 872.38 | 1,742.77 | 871.89 | T | 576.38   | 288.70 | 559.36   | 280.18 | 558.37   | 279.69 | 4 |
| 16 | 1,873.87 | 937.44 | 1,856.84 | 928.92 | 1,855.86 | 928.43 | I | 475.34   | 238.17 | 458.31   | 229.66 |          |        | 3 |
| 17 | 1,944.91 | 972.96 | 1,927.88 | 964.44 | 1,926.90 | 963.95 | A | 362.25   | 181.63 | 345.23   | 173.12 |          |        | 2 |
| 18 |          |        |          |        |          |        | K | 291.21   | 146.11 | 274.19   | 137.60 |          |        | 1 |

Query 70293 Hit 1

MS/MS Fragmentation of **ITELRPFNSWEALFTK**

Found in **sp|Q9H4L7|SMRCD\_HUMAN**, SWI/SNF-related matrix-associated actin-dependent regulator of chromatin subfamily A containing DEAD/H box 1 OS=Homo sapiens GN=SMARCAD1 PE=1 SV=2

Match to Query 70293: 2239.225from(747.4157,3+)

Title: 1049: Scan 2291 (rt=61.2141, f=3, i=360) [D:\lab212\membrane\Grace\Joyce\iTRAQ\_39\_2.raw]

Data File: Submitted from 20120508-1(merge) by Mascot Daemon on JOYCE-VAIO

Monoisotopic mass of neutral peptide Mr(calc): 2239.225

Variable modifications:

K16 iTRAQ4plex (K)

Ions Score: 46.47 Expect: 0.016

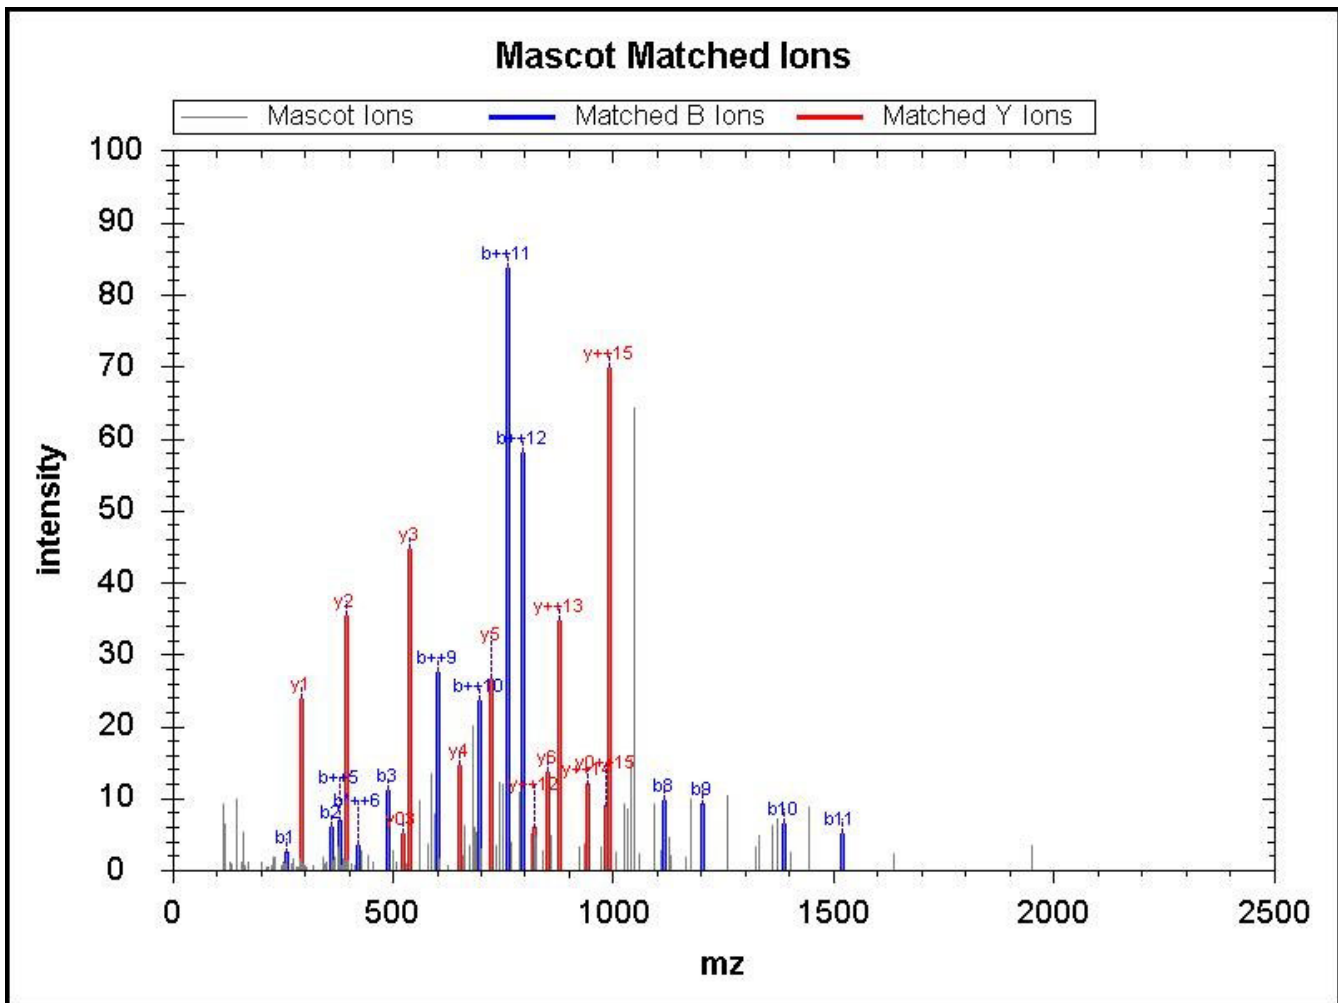

| No | b      | b++    | b*     | b*++   | b0     | b0++   | Seq | y        | y++    | y*       | y*++   | y0       | y0++   | RevNo |
|----|--------|--------|--------|--------|--------|--------|-----|----------|--------|----------|--------|----------|--------|-------|
| 1  | 258.19 | 129.60 |        |        |        |        | I   |          |        |          |        |          |        | 16    |
| 2  | 359.24 | 180.12 |        |        | 341.23 | 171.12 | T   | 1,983.05 | 992.03 | 1,966.02 | 983.51 | 1,965.03 | 983.02 | 15    |
| 3  | 488.28 | 244.65 |        |        | 470.27 | 235.64 | E   | 1,882.00 | 941.50 | 1,864.97 | 932.99 | 1,863.99 | 932.50 | 14    |
| 4  | 601.37 | 301.19 |        |        | 583.36 | 292.18 | L   | 1,752.96 | 876.98 | 1,735.93 | 868.47 | 1,734.94 | 867.98 | 13    |
| 5  | 757.47 | 379.24 | 740.44 | 370.72 | 739.46 | 370.23 | R   | 1,639.87 | 820.44 | 1,622.84 | 811.93 | 1,621.86 | 811.43 | 12    |

|    |          |        |          |        |          |        |   |          |        |          |        |          |        |    |
|----|----------|--------|----------|--------|----------|--------|---|----------|--------|----------|--------|----------|--------|----|
| 6  | 854.52   | 427.76 | 837.49   | 419.25 | 836.51   | 418.76 | P | 1,483.77 | 742.39 | 1,466.74 | 733.88 | 1,465.76 | 733.38 | 11 |
| 7  | 1,001.59 | 501.30 | 984.56   | 492.79 | 983.58   | 492.29 | F | 1,386.72 | 693.86 | 1,369.69 | 685.35 | 1,368.71 | 684.86 | 10 |
| 8  | 1,115.63 | 558.32 | 1,098.61 | 549.81 | 1,097.62 | 549.31 | N | 1,239.65 | 620.33 | 1,222.62 | 611.81 | 1,221.64 | 611.32 | 9  |
| 9  | 1,202.66 | 601.84 | 1,185.64 | 593.32 | 1,184.65 | 592.83 | S | 1,125.61 | 563.31 | 1,108.58 | 554.79 | 1,107.60 | 554.30 | 8  |
| 10 | 1,388.74 | 694.88 | 1,371.72 | 686.36 | 1,370.73 | 685.87 | W | 1,038.57 | 519.79 | 1,021.55 | 511.28 | 1,020.56 | 510.79 | 7  |
| 11 | 1,517.79 | 759.40 | 1,500.76 | 750.88 | 1,499.78 | 750.39 | E | 852.49   | 426.75 | 835.47   | 418.24 | 834.48   | 417.75 | 6  |
| 12 | 1,588.82 | 794.92 | 1,571.80 | 786.40 | 1,570.81 | 785.91 | A | 723.45   | 362.23 | 706.43   | 353.72 | 705.44   | 353.22 | 5  |
| 13 | 1,701.91 | 851.46 | 1,684.88 | 842.94 | 1,683.90 | 842.45 | L | 652.41   | 326.71 | 635.39   | 318.20 | 634.40   | 317.71 | 4  |
| 14 | 1,848.98 | 924.99 | 1,831.95 | 916.48 | 1,830.97 | 915.99 | F | 539.33   | 270.17 | 522.30   | 261.66 | 521.32   | 261.16 | 3  |
| 15 | 1,950.02 | 975.52 | 1,933.00 | 967.00 | 1,932.01 | 966.51 | T | 392.26   | 196.63 | 375.24   | 188.12 | 374.25   | 187.63 | 2  |
| 16 |          |        |          |        |          |        | K | 291.21   | 146.11 | 274.19   | 137.60 |          |        | 1  |

Query 74619 Hit 1

MS/MS Fragmentation of **DTPEDIVLEAPASGLAFHPAR**

Found in **sp|Q9H6Y2|WDR55\_HUMAN**, WD repeat-containing protein 55 OS=Homo sapiens GN=WDR55 PE=1 SV=2  
Match to Query 74619: 2349.209from(784.077,3+)

Title: 762: Sum of 2 scans in range 1769 (rt=49.0159, f=4, i=511) to 1770 (rt=49.0413, f=4, i=512)

[D:\lab212\membrane\GraceJoyce\iTRAQ\_30\_1.raw]

Data File: Submitted from 20120508-1(merge) by Mascot Daemon on JOYCE-VAIO

Monoisotopic mass of neutral peptide Mr(calc): 2349.209

Variable modifications:

Ions Score: 46.44 Expect: 0.022

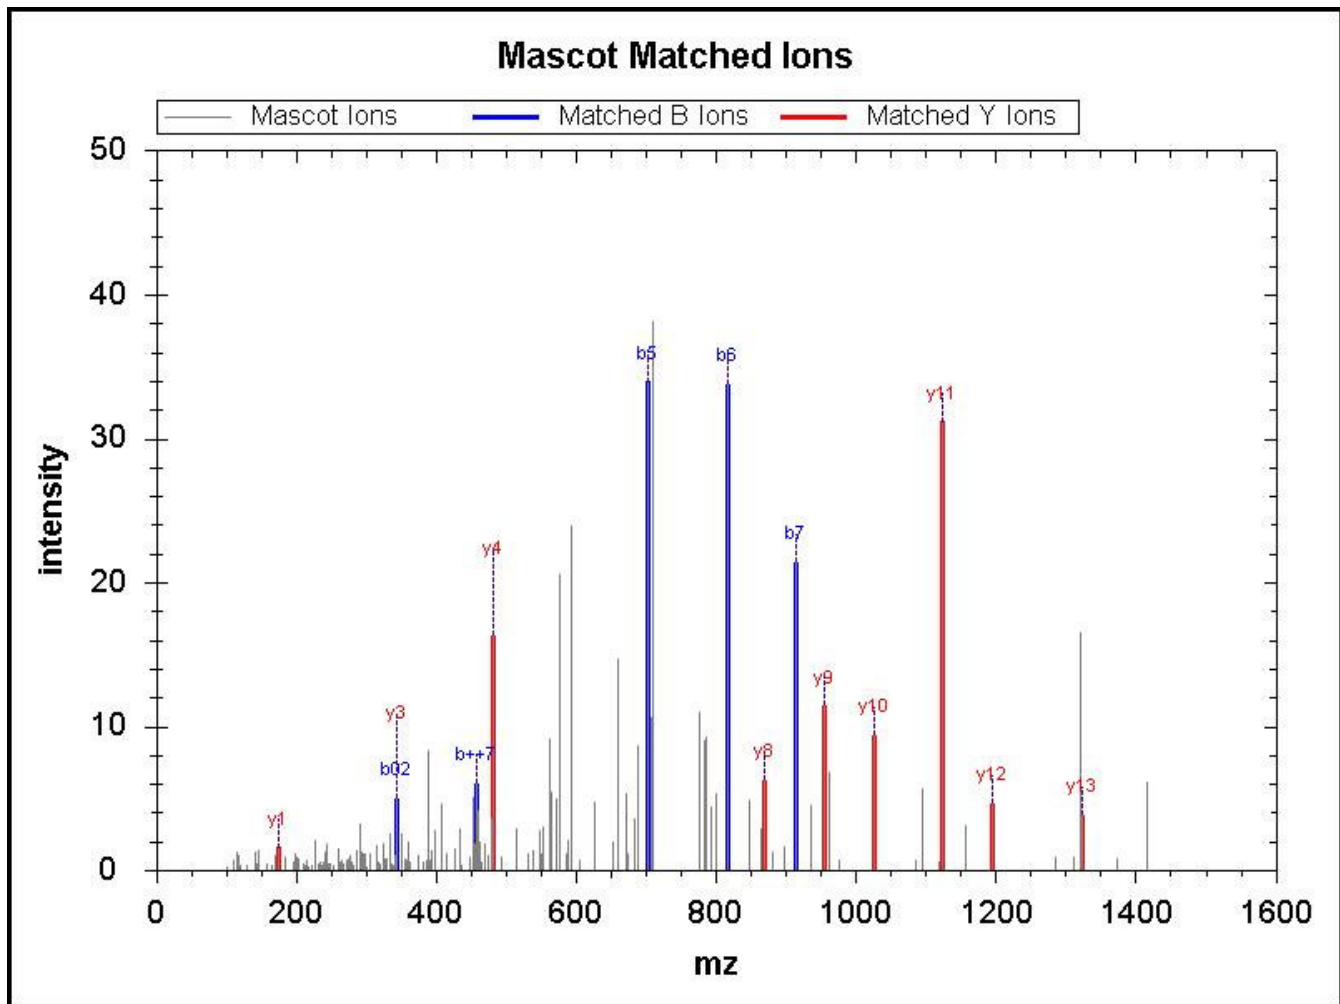

| No | b      | b++    | b0     | b0++   | Seq | y        | y++      | y*       | y*++     | y0       | y0++     | RevNo |
|----|--------|--------|--------|--------|-----|----------|----------|----------|----------|----------|----------|-------|
| 1  | 260.14 | 130.57 | 242.13 | 121.57 | D   |          |          |          |          |          |          | 21    |
| 2  | 361.18 | 181.10 | 343.17 | 172.09 | T   | 2,091.09 | 1,046.05 | 2,074.06 | 1,037.53 | 2,073.08 | 1,037.04 | 20    |
| 3  | 458.24 | 229.62 | 440.23 | 220.62 | P   | 1,990.04 | 995.52   | 1,973.01 | 987.01   | 1,972.03 | 986.52   | 19    |

|    |          |          |          |          |   |          |        |          |        |          |        |    |
|----|----------|----------|----------|----------|---|----------|--------|----------|--------|----------|--------|----|
| 4  | 587.28   | 294.14   | 569.27   | 285.14   | E | 1,892.99 | 947.00 | 1,875.96 | 938.48 | 1,874.98 | 937.99 | 18 |
| 5  | 702.31   | 351.66   | 684.30   | 342.65   | D | 1,763.94 | 882.48 | 1,746.92 | 873.96 | 1,745.93 | 873.47 | 17 |
| 6  | 815.39   | 408.20   | 797.38   | 399.19   | I | 1,648.92 | 824.96 | 1,631.89 | 816.45 | 1,630.91 | 815.96 | 16 |
| 7  | 914.46   | 457.73   | 896.45   | 448.73   | V | 1,535.83 | 768.42 | 1,518.81 | 759.91 | 1,517.82 | 759.41 | 15 |
| 8  | 1,027.54 | 514.28   | 1,009.53 | 505.27   | L | 1,436.76 | 718.89 | 1,419.74 | 710.37 | 1,418.75 | 709.88 | 14 |
| 9  | 1,156.59 | 578.80   | 1,138.57 | 569.79   | E | 1,323.68 | 662.34 | 1,306.65 | 653.83 | 1,305.67 | 653.34 | 13 |
| 10 | 1,227.62 | 614.31   | 1,209.61 | 605.31   | A | 1,194.64 | 597.82 | 1,177.61 | 589.31 | 1,176.63 | 588.82 | 12 |
| 11 | 1,324.68 | 662.84   | 1,306.66 | 653.84   | P | 1,123.60 | 562.30 | 1,106.57 | 553.79 | 1,105.59 | 553.30 | 11 |
| 12 | 1,395.71 | 698.36   | 1,377.70 | 689.35   | A | 1,026.55 | 513.78 | 1,009.52 | 505.26 | 1,008.54 | 504.77 | 10 |
| 13 | 1,482.74 | 741.88   | 1,464.73 | 732.87   | S | 955.51   | 478.26 | 938.48   | 469.75 | 937.50   | 469.25 | 9  |
| 14 | 1,539.77 | 770.39   | 1,521.76 | 761.38   | G | 868.48   | 434.74 | 851.45   | 426.23 |          |        | 8  |
| 15 | 1,652.85 | 826.93   | 1,634.84 | 817.92   | L | 811.46   | 406.23 | 794.43   | 397.72 |          |        | 7  |
| 16 | 1,723.89 | 862.45   | 1,705.88 | 853.44   | A | 698.37   | 349.69 | 681.35   | 341.18 |          |        | 6  |
| 17 | 1,870.96 | 935.98   | 1,852.94 | 926.98   | F | 627.34   | 314.17 | 610.31   | 305.66 |          |        | 5  |
| 18 | 2,008.01 | 1,004.51 | 1,990.00 | 995.51   | H | 480.27   | 240.64 | 463.24   | 232.12 |          |        | 4  |
| 19 | 2,105.07 | 1,053.04 | 2,087.06 | 1,044.03 | P | 343.21   | 172.11 | 326.18   | 163.59 |          |        | 3  |
| 20 | 2,176.10 | 1,088.56 | 2,158.09 | 1,079.55 | A | 246.16   | 123.58 | 229.13   | 115.07 |          |        | 2  |
| 21 |          |          |          |          | R | 175.12   | 88.06  | 158.09   | 79.55  |          |        | 1  |

Query 46595 Hit 1

MS/MS Fragmentation of EYQDIEEMIFHR

Found in sp|O70423|AOC3\_MOUSE, Membrane primary amine oxidase OS=Mus musculus GN=Aoc3 PE=2 SV=3

Match to Query 46595: 1752.831 from(585.2843,3+)

Title: 839: Sum of 2 scans in range 1866 (rt=51.4549, f=4, i=559) to 1867 (rt=51.4803, f=4, i=560)

[D:\lab212\membrane\Grace\Joyce\iTRAQ\_36\_2.raw]

Data File: Submitted from 20120508-1(merge) by Mascot Daemon on JOYCE-VAIO

Monoisotopic mass of neutral peptide Mr(calc): 1752.831

Variable modifications:

Ions Score: 46.32 Expect: 0.017

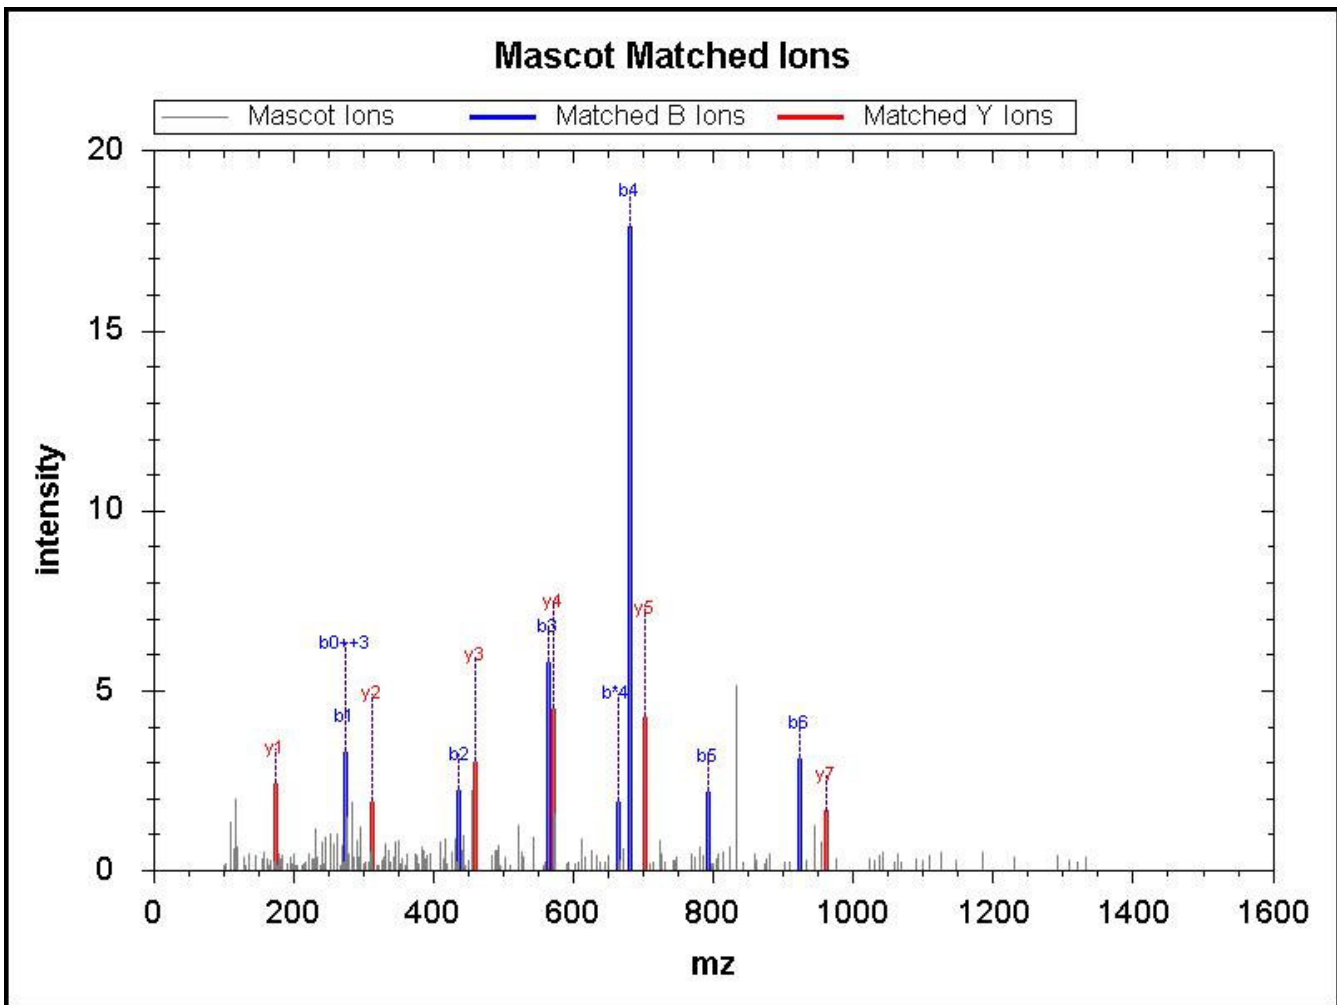

| No | b        | b++    | b*       | b*++   | b0       | b0++   | Seq | y        | y++    | y*       | y*++   | y0       | y0++   | RevNo |
|----|----------|--------|----------|--------|----------|--------|-----|----------|--------|----------|--------|----------|--------|-------|
| 1  | 274.15   | 137.58 |          |        | 256.14   | 128.57 | E   |          |        |          |        |          |        | 12    |
| 2  | 437.22   | 219.11 |          |        | 419.20   | 210.11 | Y   | 1,480.69 | 740.85 | 1,463.66 | 732.33 | 1,462.68 | 731.84 | 11    |
| 3  | 565.27   | 283.14 | 548.25   | 274.63 | 547.26   | 274.14 | Q   | 1,317.63 | 659.32 | 1,300.60 | 650.80 | 1,299.61 | 650.31 | 10    |
| 4  | 680.30   | 340.65 | 663.27   | 332.14 | 662.29   | 331.65 | D   | 1,189.57 | 595.29 | 1,172.54 | 586.77 | 1,171.56 | 586.28 | 9     |
| 5  | 793.38   | 397.20 | 776.36   | 388.68 | 775.37   | 388.19 | I   | 1,074.54 | 537.77 | 1,057.51 | 529.26 | 1,056.53 | 528.77 | 8     |
| 6  | 922.43   | 461.72 | 905.40   | 453.20 | 904.42   | 452.71 | E   | 961.46   | 481.23 | 944.43   | 472.72 | 943.45   | 472.23 | 7     |
| 7  | 1,051.47 | 526.24 | 1,034.44 | 517.73 | 1,033.46 | 517.23 | E   | 832.41   | 416.71 | 815.39   | 408.20 | 814.40   | 407.71 | 6     |
| 8  | 1,182.51 | 591.76 | 1,165.48 | 583.25 | 1,164.50 | 582.75 | M   | 703.37   | 352.19 | 686.34   | 343.68 |          |        | 5     |
| 9  | 1,295.59 | 648.30 | 1,278.57 | 639.79 | 1,277.58 | 639.30 | I   | 572.33   | 286.67 | 555.30   | 278.16 |          |        | 4     |
| 10 | 1,442.66 | 721.84 | 1,425.64 | 713.32 | 1,424.65 | 712.83 | F   | 459.25   | 230.13 | 442.22   | 221.61 |          |        | 3     |
| 11 | 1,579.72 | 790.36 | 1,562.70 | 781.85 | 1,561.71 | 781.36 | H   | 312.18   | 156.59 | 295.15   | 148.08 |          |        | 2     |
| 12 |          |        |          |        |          |        | R   | 175.12   | 88.06  | 158.09   | 79.55  |          |        | 1     |

Query 43336 Hit 1

MS/MS Fragmentation of **QGNVLVISHQAVMR**

Found in **sp|O60825|F262\_HUMAN**, 6-phosphofructo-2-kinase/fructose-2

Match to Query 43336: 1694.925from(565.9824,3+)

Title: 386: Scan 937 (rt=30.5082, f=2, i=142) [D:\lab212\membrane\Grace\Joyce\iTRAQ\_36\_1.raw]

Data File: Submitted from 20120508-1(merge) by Mascot Daemon on JOYCE-VAIO

Monoisotopic mass of neutral peptide Mr(calc): 1694.925

Variable modifications:

Ions Score: 46.17 Expect: 0.019

### Mascot Matched Ions

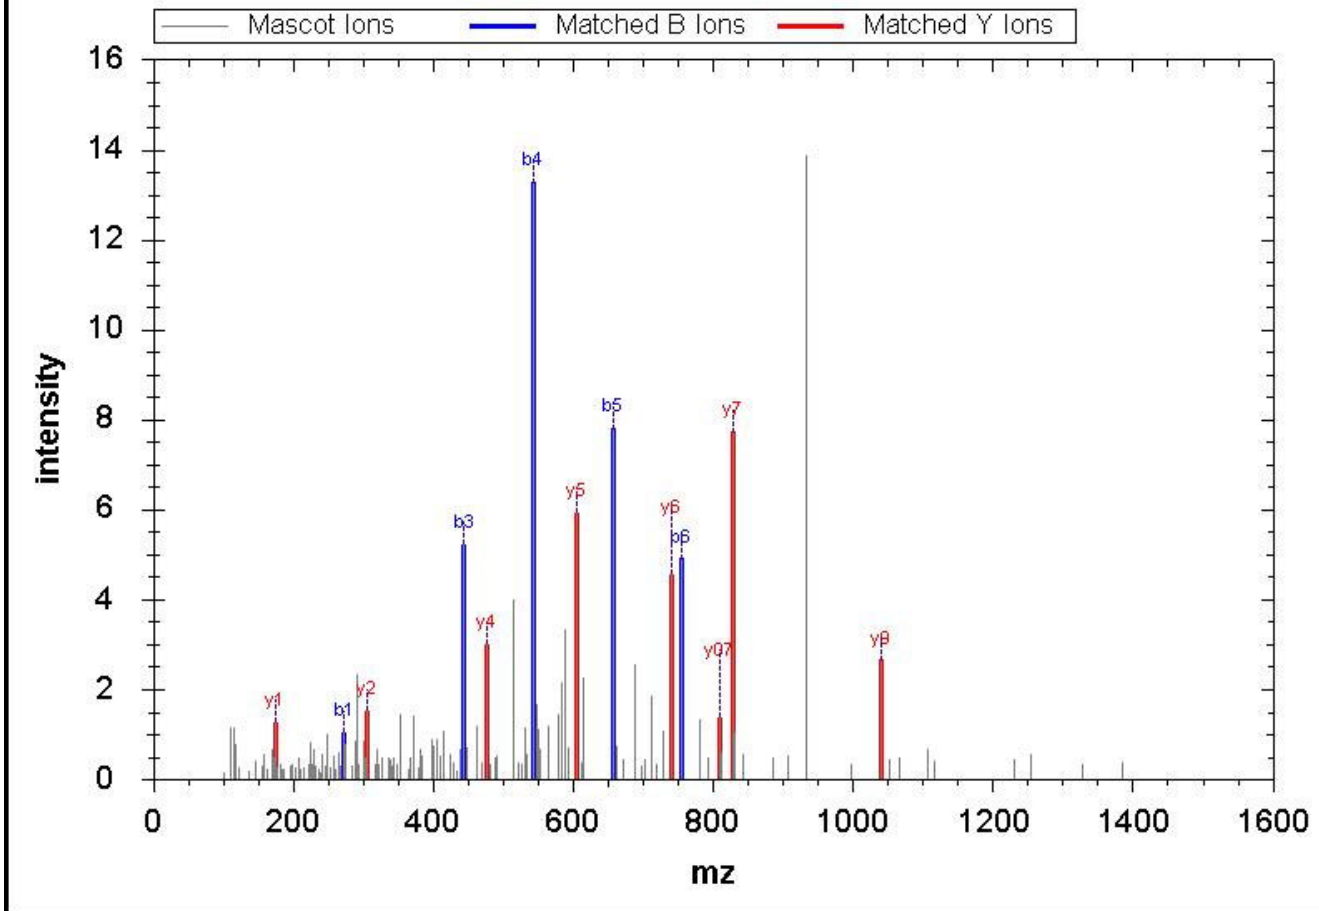

| No | b        | b++    | b*       | b*++   | b0       | b0++   | Seq | y        | y++    | y*       | y*++   | y0       | y0++   | RevNo |
|----|----------|--------|----------|--------|----------|--------|-----|----------|--------|----------|--------|----------|--------|-------|
| 1  | 273.17   | 137.09 | 256.14   | 128.57 |          |        | Q   |          |        |          |        |          |        | 14    |
| 2  | 330.19   | 165.60 | 313.16   | 157.09 |          |        | G   | 1,423.78 | 712.40 | 1,406.76 | 703.88 | 1,405.77 | 703.39 | 13    |
| 3  | 444.23   | 222.62 | 427.21   | 214.11 |          |        | N   | 1,366.76 | 683.88 | 1,349.74 | 675.37 | 1,348.75 | 674.88 | 12    |
| 4  | 543.30   | 272.15 | 526.27   | 263.64 |          |        | V   | 1,252.72 | 626.86 | 1,235.69 | 618.35 | 1,234.71 | 617.86 | 11    |
| 5  | 656.38   | 328.70 | 639.36   | 320.18 |          |        | L   | 1,153.65 | 577.33 | 1,136.62 | 568.82 | 1,135.64 | 568.32 | 10    |
| 6  | 755.45   | 378.23 | 738.43   | 369.72 |          |        | V   | 1,040.57 | 520.79 | 1,023.54 | 512.27 | 1,022.56 | 511.78 | 9     |
| 7  | 868.54   | 434.77 | 851.51   | 426.26 |          |        | I   | 941.50   | 471.25 | 924.47   | 462.74 | 923.49   | 462.25 | 8     |
| 8  | 955.57   | 478.29 | 938.54   | 469.77 | 937.56   | 469.28 | S   | 828.41   | 414.71 | 811.39   | 406.20 | 810.40   | 405.71 | 7     |
| 9  | 1,092.63 | 546.82 | 1,075.60 | 538.30 | 1,074.62 | 537.81 | H   | 741.38   | 371.19 | 724.36   | 362.68 |          |        | 6     |
| 10 | 1,220.69 | 610.85 | 1,203.66 | 602.33 | 1,202.68 | 601.84 | Q   | 604.32   | 302.67 | 587.30   | 294.15 |          |        | 5     |
| 11 | 1,291.72 | 646.37 | 1,274.70 | 637.85 | 1,273.71 | 637.36 | A   | 476.26   | 238.64 | 459.24   | 230.12 |          |        | 4     |
| 12 | 1,390.79 | 695.90 | 1,373.77 | 687.39 | 1,372.78 | 686.89 | V   | 405.23   | 203.12 | 388.20   | 194.60 |          |        | 3     |
| 13 | 1,521.83 | 761.42 | 1,504.81 | 752.91 | 1,503.82 | 752.41 | M   | 306.16   | 153.58 | 289.13   | 145.07 |          |        | 2     |
| 14 |          |        |          |        |          |        | R   | 175.12   | 88.06  | 158.09   | 79.55  |          |        | 1     |

Query 56454 Hit 1

MS/MS Fragmentation of **WKDTDEADLVLAK**

Found in [sp|P45973|CBX5\\_HUMAN](#), Chromobox protein homolog 5 OS=Homo sapiens GN=CBX5 PE=1 SV=1

Match to Query 56454: 1935.069from(646.0303,3+)

Title: 567: Sum of 2 scans in range 1255 (rt=37.9625, f=4, i=381) to 1256 (rt=37.9879, f=4, i=382)

[D:\lab212\membrane\GraceJoyce\iTRAQ\_45\_1.raw]

Data File: Submitted from 20120508-1(merge) by Mascot Daemon on JOYCE-VAIO

Monoisotopic mass of neutral peptide Mr(calc): 1935.069

Variable modifications:

K2 :iTRAQ4plex (K)

K13 :iTRAQ4plex (K)

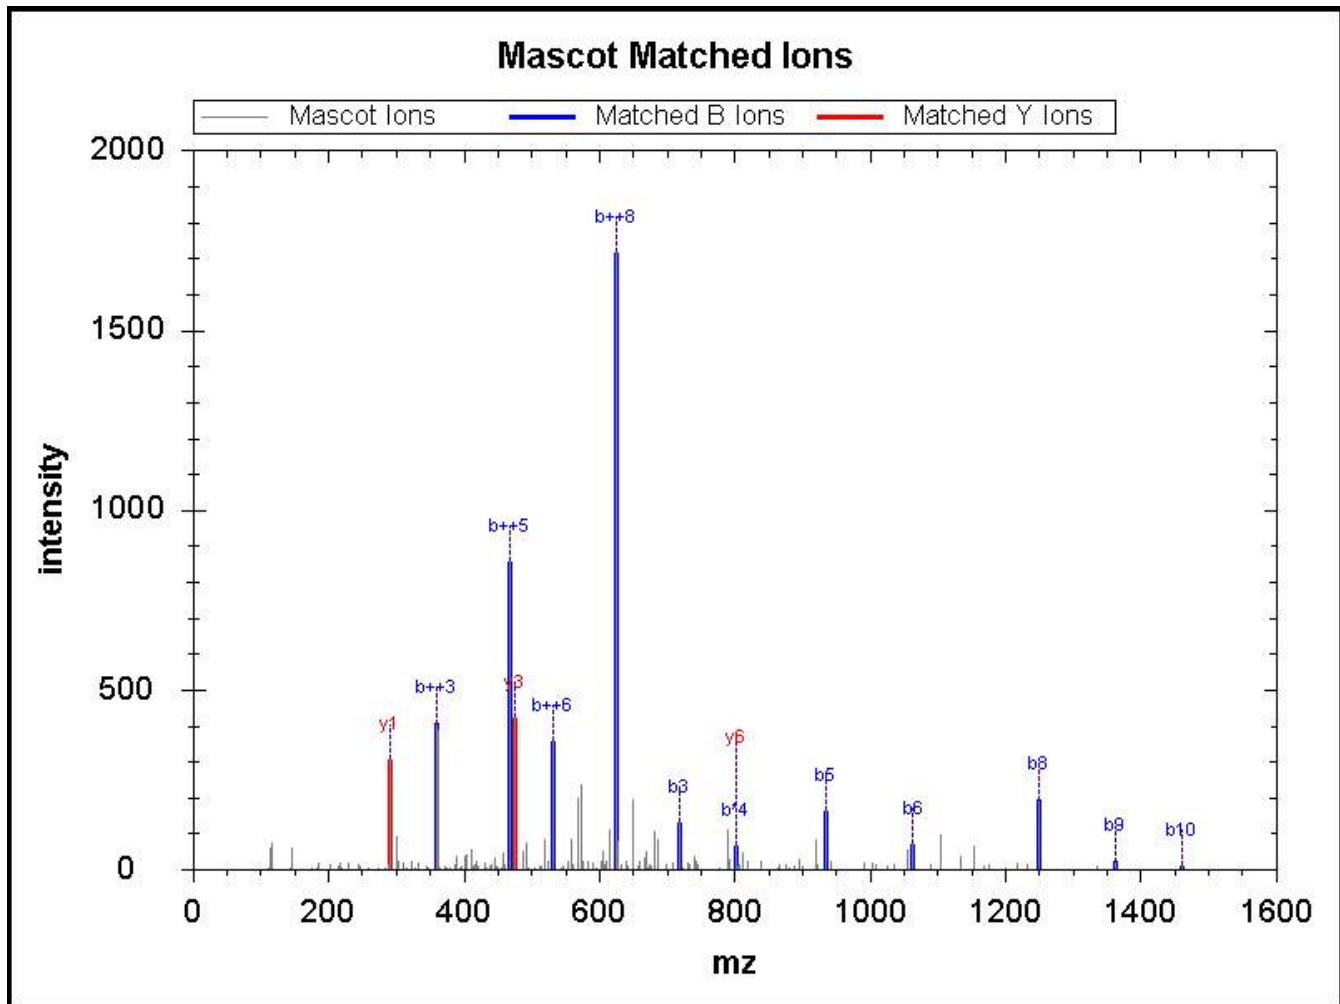

| No | b        | b++    | b*       | b*++   | b0       | b0++   | Seq | y        | y++    | y*       | y*++   | y0       | y0++   | RevNo |
|----|----------|--------|----------|--------|----------|--------|-----|----------|--------|----------|--------|----------|--------|-------|
| 1  | 331.19   | 166.10 |          |        |          |        | W   |          |        |          |        |          |        | 13    |
| 2  | 603.39   | 302.20 | 586.36   | 293.68 |          |        | K   | 1,605.89 | 803.45 | 1,588.87 | 794.94 | 1,587.88 | 794.45 | 12    |
| 3  | 718.41   | 359.71 | 701.39   | 351.20 | 700.40   | 350.70 | D   | 1,333.70 | 667.35 | 1,316.67 | 658.84 | 1,315.69 | 658.35 | 11    |
| 4  | 819.46   | 410.23 | 802.43   | 401.72 | 801.45   | 401.23 | T   | 1,218.67 | 609.84 | 1,201.64 | 601.33 | 1,200.66 | 600.83 | 10    |
| 5  | 934.49   | 467.75 | 917.46   | 459.23 | 916.48   | 458.74 | D   | 1,117.62 | 559.31 | 1,100.60 | 550.80 | 1,099.61 | 550.31 | 9     |
| 6  | 1,063.53 | 532.27 | 1,046.50 | 523.76 | 1,045.52 | 523.26 | E   | 1,002.60 | 501.80 | 985.57   | 493.29 | 984.58   | 492.80 | 8     |
| 7  | 1,134.57 | 567.79 | 1,117.54 | 559.27 | 1,116.56 | 558.78 | A   | 873.55   | 437.28 | 856.53   | 428.77 | 855.54   | 428.27 | 7     |
| 8  | 1,249.59 | 625.30 | 1,232.57 | 616.79 | 1,231.58 | 616.30 | D   | 802.52   | 401.76 | 785.49   | 393.25 | 784.50   | 392.76 | 6     |
| 9  | 1,362.68 | 681.84 | 1,345.65 | 673.33 | 1,344.67 | 672.84 | L   | 687.49   | 344.25 | 670.46   | 335.73 |          |        | 5     |
| 10 | 1,461.75 | 731.38 | 1,444.72 | 722.86 | 1,443.74 | 722.37 | V   | 574.40   | 287.71 | 557.38   | 279.19 |          |        | 4     |
| 11 | 1,574.83 | 787.92 | 1,557.80 | 779.41 | 1,556.82 | 778.91 | L   | 475.34   | 238.17 | 458.31   | 229.66 |          |        | 3     |
| 12 | 1,645.87 | 823.44 | 1,628.84 | 814.92 | 1,627.86 | 814.43 | A   | 362.25   | 181.63 | 345.23   | 173.12 |          |        | 2     |
| 13 |          |        |          |        |          |        | K   | 291.21   | 146.11 | 274.19   | 137.60 |          |        | 1     |

Query 69344 Hit 1

MS/MS Fragmentation of **SLEDLIFESLPENASHK**

Found in **sp|O95260|ATE1\_HUMAN**, Arginyl-tRNA--protein transferase 1 OS=Homo sapiens GN=ATE1 PE=1 SV=2

Match to Query 69344: 2216.161 from (739.7275,3+)

Title: 975: Sum of 2 scans in range 2140 (rt=57.6488, f=4, i=649) to 2141 (rt=57.6742, f=4, i=650)

[D:\lab212\membrane\GraceJoyce\iTRAQ\_37\_1.raw]

Data File: Submitted from 20120508-1(merge) by Mascot Daemon on JOYCE-VAIO

Monoisotopic mass of neutral peptide Mr(calc): 2216.161

Variable modifications:

K17 iTRAQ4plex (K)



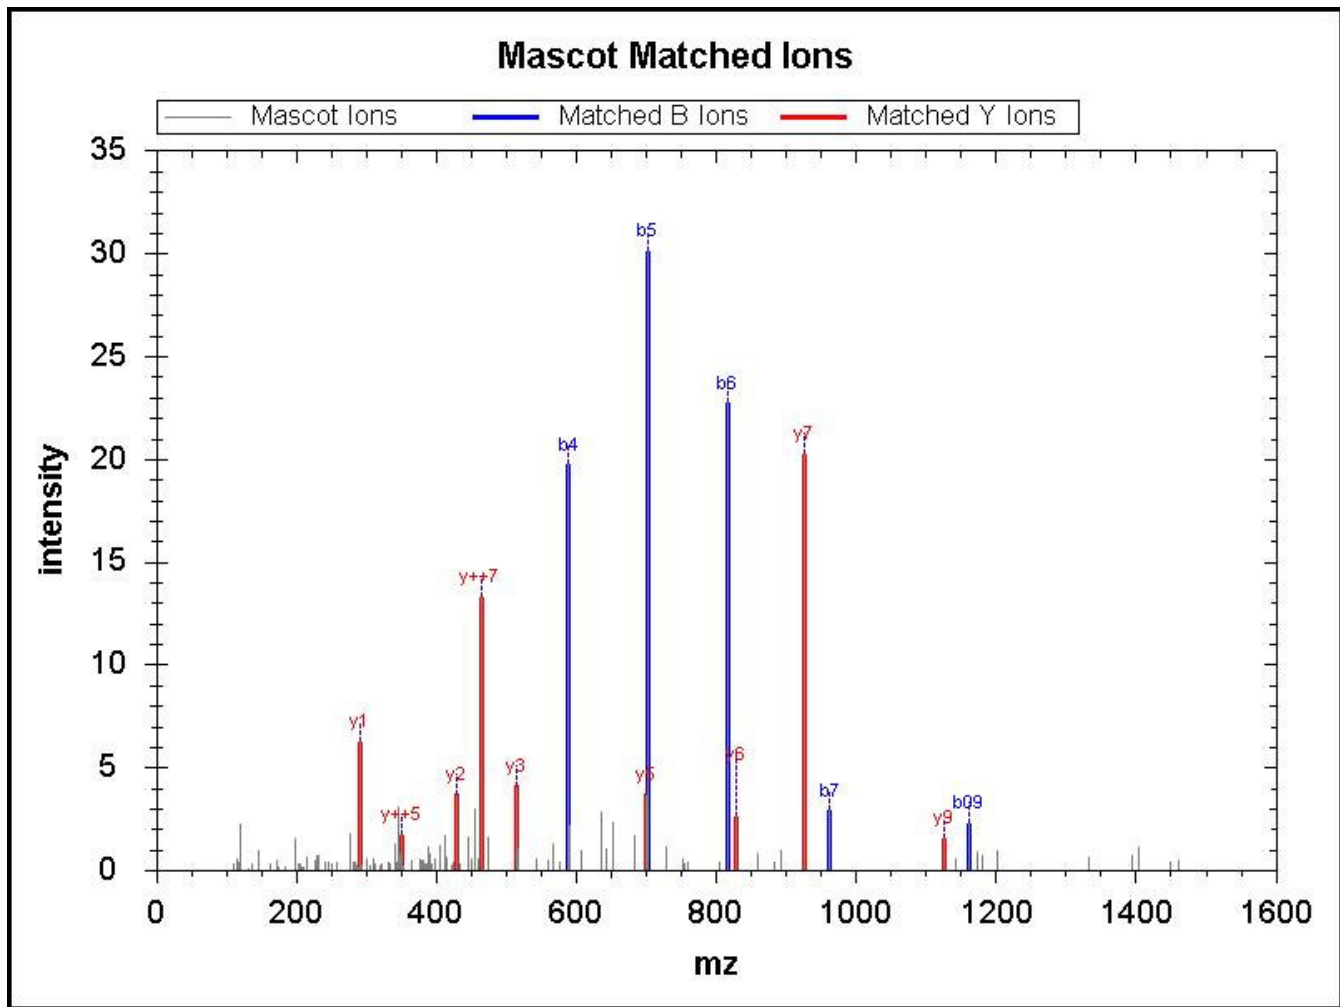

| No | b        | b++    | b*       | b*++   | b0       | b0++   | Seq | y        | y++    | y*       | y*++   | y0       | y0++   | RevNo |
|----|----------|--------|----------|--------|----------|--------|-----|----------|--------|----------|--------|----------|--------|-------|
| 1  | 232.14   | 116.57 |          |        | 214.13   | 107.57 | S   |          |        |          |        |          |        | 17    |
| 2  | 345.23   | 173.12 |          |        | 327.21   | 164.11 | L   | 1,986.03 | 993.52 | 1,969.00 | 985.01 | 1,968.02 | 984.51 | 16    |
| 3  | 474.27   | 237.64 |          |        | 456.26   | 228.63 | E   | 1,872.95 | 936.98 | 1,855.92 | 928.46 | 1,854.94 | 927.97 | 15    |
| 4  | 589.29   | 295.15 |          |        | 571.28   | 286.15 | D   | 1,743.90 | 872.46 | 1,726.88 | 863.94 | 1,725.89 | 863.45 | 14    |
| 5  | 702.38   | 351.69 |          |        | 684.37   | 342.69 | L   | 1,628.88 | 814.94 | 1,611.85 | 806.43 | 1,610.87 | 805.94 | 13    |
| 6  | 815.46   | 408.24 |          |        | 797.45   | 399.23 | I   | 1,515.79 | 758.40 | 1,498.77 | 749.89 | 1,497.78 | 749.39 | 12    |
| 7  | 962.53   | 481.77 |          |        | 944.52   | 472.76 | F   | 1,402.71 | 701.86 | 1,385.68 | 693.34 | 1,384.70 | 692.85 | 11    |
| 8  | 1,091.57 | 546.29 |          |        | 1,073.56 | 537.29 | E   | 1,255.64 | 628.32 | 1,238.61 | 619.81 | 1,237.63 | 619.32 | 10    |
| 9  | 1,178.61 | 589.81 |          |        | 1,160.60 | 580.80 | S   | 1,126.60 | 563.80 | 1,109.57 | 555.29 | 1,108.59 | 554.80 | 9     |
| 10 | 1,291.69 | 646.35 |          |        | 1,273.68 | 637.34 | L   | 1,039.57 | 520.29 | 1,022.54 | 511.77 | 1,021.55 | 511.28 | 8     |
| 11 | 1,388.74 | 694.88 |          |        | 1,370.73 | 685.87 | P   | 926.48   | 463.74 | 909.45   | 455.23 | 908.47   | 454.74 | 7     |
| 12 | 1,517.79 | 759.40 |          |        | 1,499.77 | 750.39 | E   | 829.43   | 415.22 | 812.40   | 406.70 | 811.42   | 406.21 | 6     |
| 13 | 1,631.83 | 816.42 | 1,614.80 | 807.90 | 1,613.82 | 807.41 | N   | 700.39   | 350.70 | 683.36   | 342.18 | 682.38   | 341.69 | 5     |
| 14 | 1,702.87 | 851.94 | 1,685.84 | 843.42 | 1,684.85 | 842.93 | A   | 586.34   | 293.68 | 569.32   | 285.16 | 568.33   | 284.67 | 4     |
| 15 | 1,789.90 | 895.45 | 1,772.87 | 886.94 | 1,771.89 | 886.45 | S   | 515.31   | 258.16 | 498.28   | 249.64 | 497.30   | 249.15 | 3     |
| 16 | 1,926.96 | 963.98 | 1,909.93 | 955.47 | 1,908.95 | 954.98 | H   | 428.27   | 214.64 | 411.25   | 206.13 |          |        | 2     |
| 17 |          |        |          |        |          |        | K   | 291.21   | 146.11 | 274.19   | 137.60 |          |        | 1     |

Query 42907 Hit 1

MS/MS Fragmentation of **LGVTNTIISHYDGR**

Found in [sp|P46087|NOP2\\_HUMAN](#), Putative ribosomal RNA methyltransferase NOP2 OS=Homo sapiens GN=NOP2 PE=1 SV=2  
Match to Query 42907: 1688.894from(563.9719,3+)

Title: 513: Scan 1201 (rt=36.4637, f=2, i=185) [D:\lab212\membrane\Grace\Joyce\iTRAQ\_36\_2.raw]

Data File: Submitted from 20120508-1(merge) by Mascot Daemon on JOYCE-VAIO

Monoisotopic mass of neutral peptide Mr(calc): 1688.894

Variable modifications:

Ions Score: 45.99 Expect: 0.022

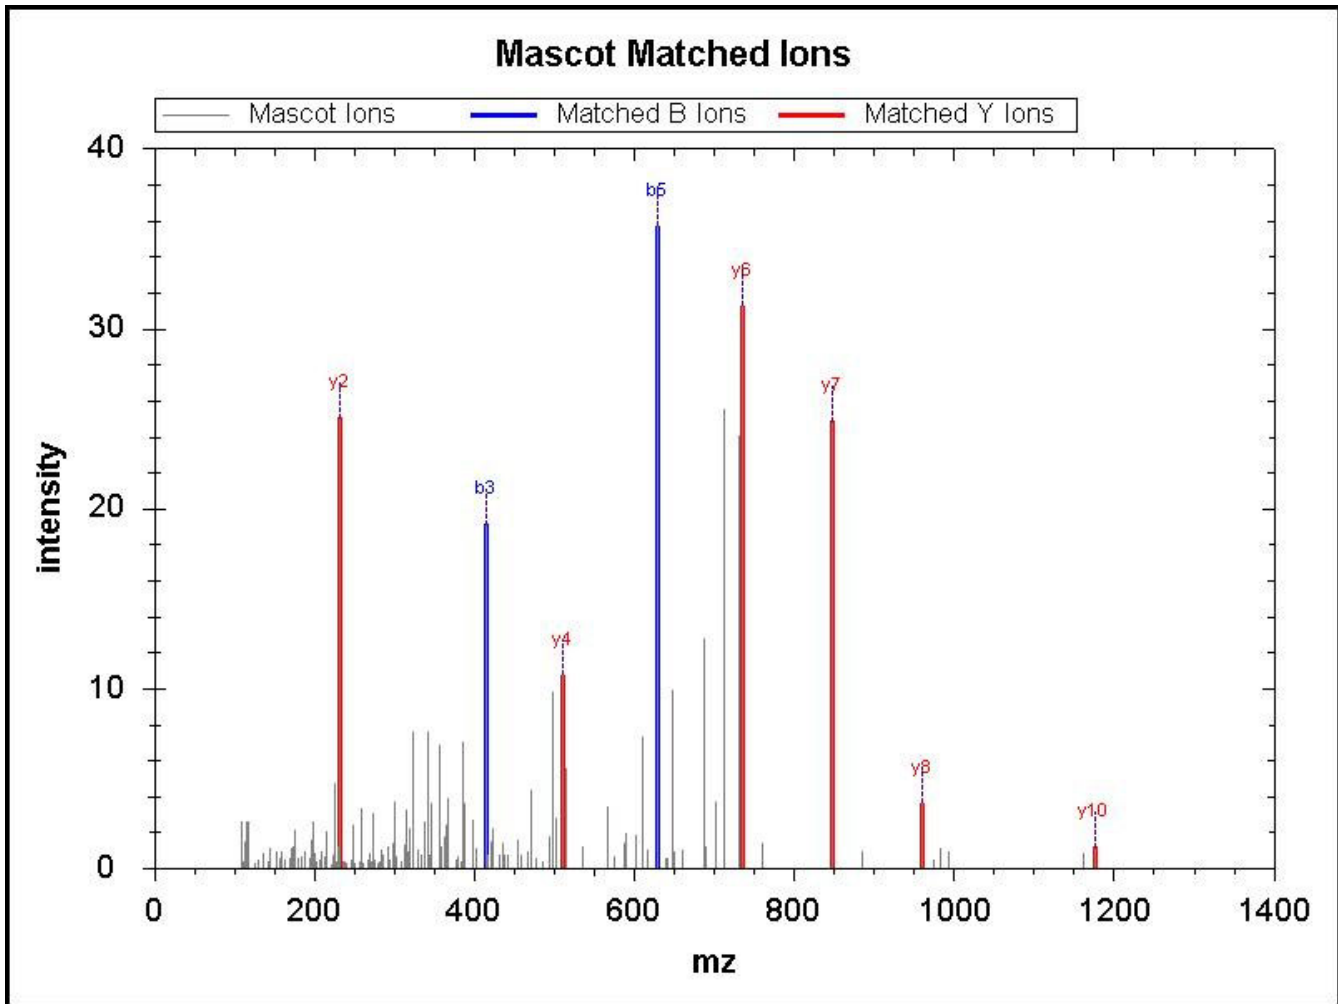

| No | b        | b++    | b*       | b*++   | b0       | b0++   | Seq | y        | y++    | y*       | y*++   | y0       | y0++   | RevNo |
|----|----------|--------|----------|--------|----------|--------|-----|----------|--------|----------|--------|----------|--------|-------|
| 1  | 258.19   | 129.60 |          |        |          |        | L   |          |        |          |        |          |        | 14    |
| 2  | 315.21   | 158.11 |          |        |          |        | G   | 1,432.72 | 716.86 | 1,415.69 | 708.35 | 1,414.71 | 707.86 | 13    |
| 3  | 414.28   | 207.65 |          |        |          |        | V   | 1,375.70 | 688.35 | 1,358.67 | 679.84 | 1,357.69 | 679.35 | 12    |
| 4  | 515.33   | 258.17 |          |        | 497.32   | 249.16 | T   | 1,276.63 | 638.82 | 1,259.60 | 630.30 | 1,258.62 | 629.81 | 11    |
| 5  | 629.37   | 315.19 | 612.35   | 306.68 | 611.36   | 306.19 | N   | 1,175.58 | 588.29 | 1,158.55 | 579.78 | 1,157.57 | 579.29 | 10    |
| 6  | 730.42   | 365.71 | 713.39   | 357.20 | 712.41   | 356.71 | T   | 1,061.54 | 531.27 | 1,044.51 | 522.76 | 1,043.53 | 522.27 | 9     |
| 7  | 843.51   | 422.26 | 826.48   | 413.74 | 825.49   | 413.25 | I   | 960.49   | 480.75 | 943.46   | 472.24 | 942.48   | 471.74 | 8     |
| 8  | 956.59   | 478.80 | 939.56   | 470.29 | 938.58   | 469.79 | I   | 847.41   | 424.21 | 830.38   | 415.69 | 829.40   | 415.20 | 7     |
| 9  | 1,043.62 | 522.31 | 1,026.60 | 513.80 | 1,025.61 | 513.31 | S   | 734.32   | 367.66 | 717.30   | 359.15 | 716.31   | 358.66 | 6     |
| 10 | 1,180.68 | 590.84 | 1,163.65 | 582.33 | 1,162.67 | 581.84 | H   | 647.29   | 324.15 | 630.26   | 315.64 | 629.28   | 315.14 | 5     |
| 11 | 1,343.74 | 672.38 | 1,326.72 | 663.86 | 1,325.73 | 663.37 | Y   | 510.23   | 255.62 | 493.20   | 247.11 | 492.22   | 246.61 | 4     |
| 12 | 1,458.77 | 729.89 | 1,441.74 | 721.38 | 1,440.76 | 720.88 | D   | 347.17   | 174.09 | 330.14   | 165.57 | 329.16   | 165.08 | 3     |
| 13 | 1,515.79 | 758.40 | 1,498.77 | 749.89 | 1,497.78 | 749.39 | G   | 232.14   | 116.57 | 215.11   | 108.06 |          |        | 2     |
| 14 |          |        |          |        |          |        | R   | 175.12   | 88.06  | 158.09   | 79.55  |          |        | 1     |

Query 51389 Hit 1

MS/MS Fragmentation of **KGVEGLIDIENPNR**

Found in **sp|Q13442|HAP28\_HUMAN**, 28 kDa heat- and acid-stable phosphoprotein OS=Homo sapiens GN=PDAP1 PE=1 SV=1

Match to Query 51389: 1841.03 from (614.6841, 3+)

Title: 560: Scan 1276 (rt=38.3412, f=3, i=193) [D:\lab212\membrane\Grace\Joyce\iTRAQ\_44\_2.raw]

Data File: Submitted from 20120508-1(merge) by Mascot Daemon on JOYCE-VAIO

Monoisotopic mass of neutral peptide Mr(calc): 1841.03

Variable modifications:

K1 iTRAQ4plex (K)

Ions Score: 45.92 Expect: 0.017

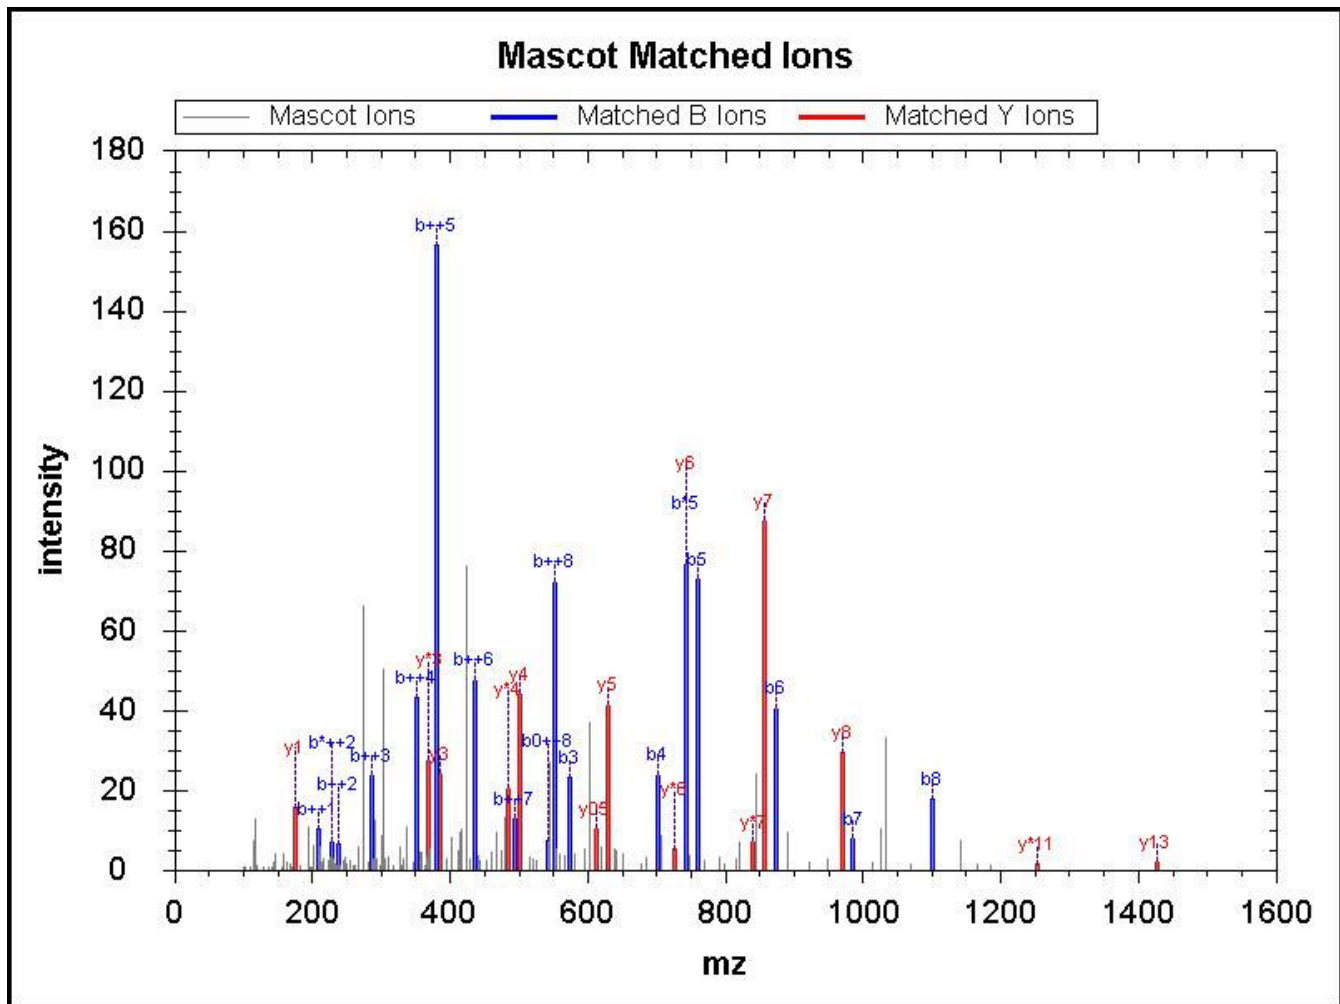

| No | b        | b++    | b*       | b*++   | b0       | b0++   | Seq | y        | y++    | y*       | y*++   | y0       | y0++   | RevNo |
|----|----------|--------|----------|--------|----------|--------|-----|----------|--------|----------|--------|----------|--------|-------|
| 1  | 417.31   | 209.16 | 400.28   | 200.64 |          |        | K   |          |        |          |        |          |        | 14    |
| 2  | 474.33   | 237.67 | 457.30   | 229.15 |          |        | G   | 1,425.73 | 713.37 | 1,408.71 | 704.86 | 1,407.72 | 704.36 | 13    |
| 3  | 573.40   | 287.20 | 556.37   | 278.69 |          |        | V   | 1,368.71 | 684.86 | 1,351.69 | 676.35 | 1,350.70 | 675.85 | 12    |
| 4  | 702.44   | 351.72 | 685.41   | 343.21 | 684.43   | 342.72 | E   | 1,269.64 | 635.33 | 1,252.62 | 626.81 | 1,251.63 | 626.32 | 11    |
| 5  | 759.46   | 380.23 | 742.43   | 371.72 | 741.45   | 371.23 | G   | 1,140.60 | 570.80 | 1,123.57 | 562.29 | 1,122.59 | 561.80 | 10    |
| 6  | 872.54   | 436.78 | 855.52   | 428.26 | 854.53   | 427.77 | L   | 1,083.58 | 542.29 | 1,066.55 | 533.78 | 1,065.57 | 533.29 | 9     |
| 7  | 985.63   | 493.32 | 968.60   | 484.80 | 967.62   | 484.31 | I   | 970.50   | 485.75 | 953.47   | 477.24 | 952.48   | 476.75 | 8     |
| 8  | 1,100.66 | 550.83 | 1,083.63 | 542.32 | 1,082.64 | 541.83 | D   | 857.41   | 429.21 | 840.38   | 420.70 | 839.40   | 420.20 | 7     |
| 9  | 1,213.74 | 607.37 | 1,196.71 | 598.86 | 1,195.73 | 598.37 | I   | 742.38   | 371.70 | 725.36   | 363.18 | 724.37   | 362.69 | 6     |
| 10 | 1,342.78 | 671.89 | 1,325.76 | 663.38 | 1,324.77 | 662.89 | E   | 629.30   | 315.15 | 612.27   | 306.64 | 611.29   | 306.15 | 5     |
| 11 | 1,456.83 | 728.92 | 1,439.80 | 720.40 | 1,438.81 | 719.91 | N   | 500.26   | 250.63 | 483.23   | 242.12 |          |        | 4     |
| 12 | 1,553.88 | 777.44 | 1,536.85 | 768.93 | 1,535.87 | 768.44 | P   | 386.21   | 193.61 | 369.19   | 185.10 |          |        | 3     |
| 13 | 1,667.92 | 834.46 | 1,650.89 | 825.95 | 1,649.91 | 825.46 | N   | 289.16   | 145.08 | 272.14   | 136.57 |          |        | 2     |
| 14 |          |        |          |        |          |        | R   | 175.12   | 88.06  | 158.09   | 79.55  |          |        | 1     |

Query 56949 Hit 1

MS/MS Fragmentation of **DILLELVEHHLTPK**

Found in **sp|Q9D8Y7|TP8L2\_MOUSE**, Tumor necrosis factor alpha-induced protein 8-like protein 2 OS=Mus musculus GN=Tnfaip8l2 PE=1 SV=1

Match to Query 56949: 1944.131 from(487.04,4+)

Title: 952: Sum of 2 scans in range 2158 (rt=58.0805, f=4, i=656) to 2159 (rt=58.1059, f=4, i=657)

[D:\lab212\membrane\GraceJoyce\47\_1.raw]

Data File: Submitted from 20120508-1(merge) by Mascot Daemon on JOYCE-VAIO

Monoisotopic mass of neutral peptide Mr(calc): 1944.131

Variable modifications:

K14 :iTRAQ4plex (K)

Ions Score: 45.89 Expect: 0.012

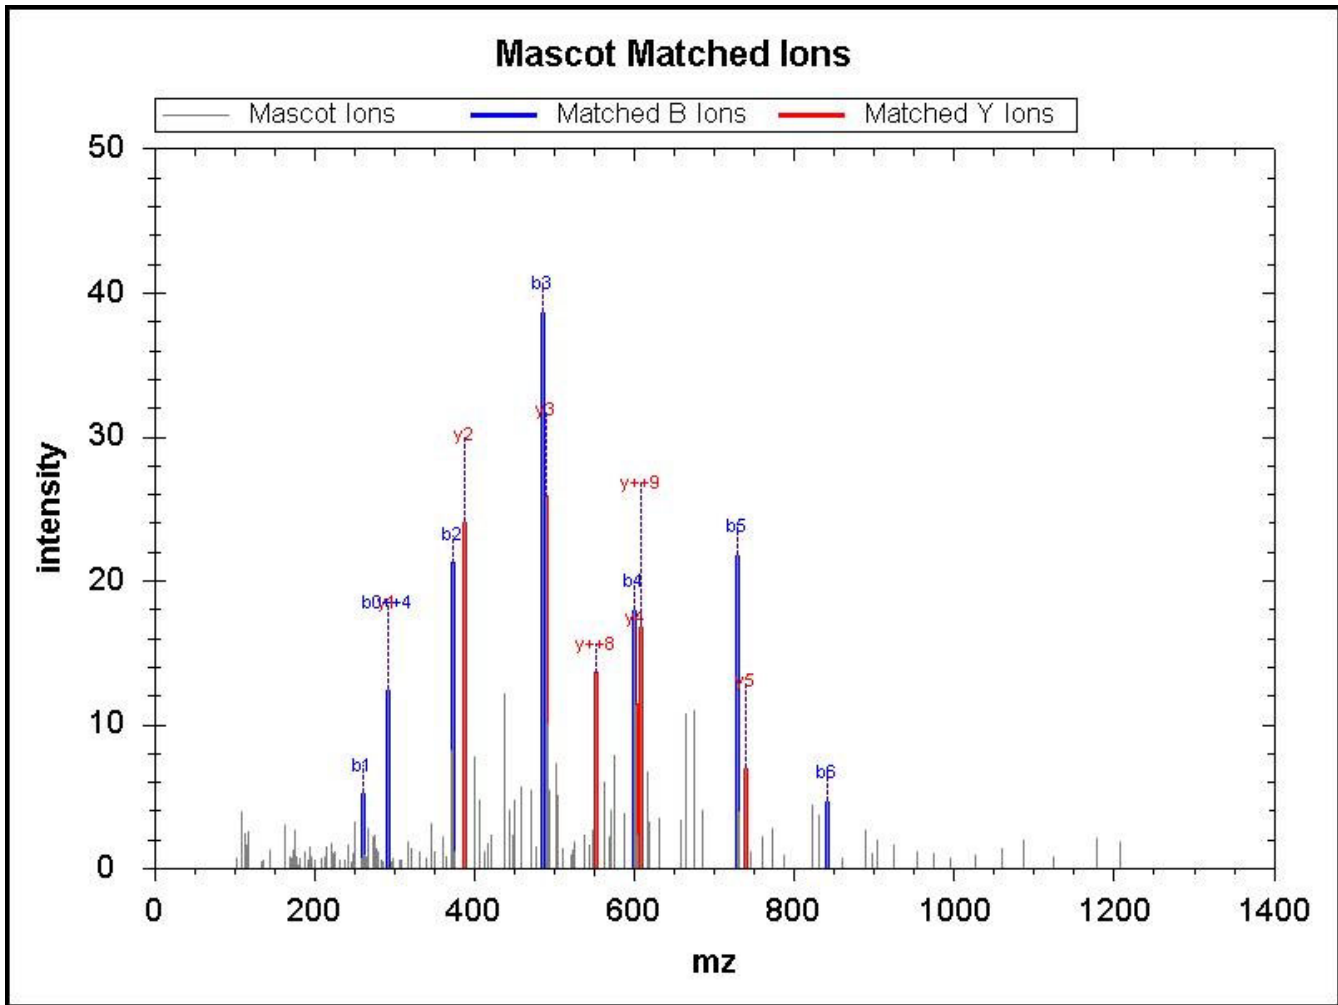

| No | b        | b++    | b0       | b0++   | Seq | y        | y++    | y*       | y*++   | y0       | y0++   | RevNo |
|----|----------|--------|----------|--------|-----|----------|--------|----------|--------|----------|--------|-------|
| 1  | 260.14   | 130.57 | 242.13   | 121.57 | D   |          |        |          |        |          |        | 14    |
| 2  | 373.22   | 187.11 | 355.21   | 178.11 | I   | 1,686.01 | 843.51 | 1,668.98 | 834.99 | 1,668.00 | 834.50 | 13    |
| 3  | 486.30   | 243.66 | 468.29   | 234.65 | L   | 1,572.92 | 786.97 | 1,555.90 | 778.45 | 1,554.91 | 777.96 | 12    |
| 4  | 599.39   | 300.20 | 581.38   | 291.19 | L   | 1,459.84 | 730.42 | 1,442.81 | 721.91 | 1,441.83 | 721.42 | 11    |
| 5  | 728.43   | 364.72 | 710.42   | 355.71 | E   | 1,346.75 | 673.88 | 1,329.73 | 665.37 | 1,328.74 | 664.88 | 10    |
| 6  | 841.52   | 421.26 | 823.50   | 412.26 | L   | 1,217.71 | 609.36 | 1,200.69 | 600.85 | 1,199.70 | 600.35 | 9     |
| 7  | 940.58   | 470.80 | 922.57   | 461.79 | V   | 1,104.63 | 552.82 | 1,087.60 | 544.30 | 1,086.62 | 543.81 | 8     |
| 8  | 1,069.63 | 535.32 | 1,051.62 | 526.31 | E   | 1,005.56 | 503.28 | 988.53   | 494.77 | 987.55   | 494.28 | 7     |
| 9  | 1,206.69 | 603.85 | 1,188.67 | 594.84 | H   | 876.52   | 438.76 | 859.49   | 430.25 | 858.51   | 429.76 | 6     |
| 10 | 1,343.74 | 672.38 | 1,325.73 | 663.37 | H   | 739.46   | 370.23 | 722.43   | 361.72 | 721.45   | 361.23 | 5     |
| 11 | 1,456.83 | 728.92 | 1,438.82 | 719.91 | L   | 602.40   | 301.70 | 585.37   | 293.19 | 584.39   | 292.70 | 4     |
| 12 | 1,557.88 | 779.44 | 1,539.87 | 770.44 | T   | 489.32   | 245.16 | 472.29   | 236.65 | 471.30   | 236.16 | 3     |
| 13 | 1,654.93 | 827.97 | 1,636.92 | 818.96 | P   | 388.27   | 194.64 | 371.24   | 186.12 |          |        | 2     |
| 14 |          |        |          |        | K   | 291.21   | 146.11 | 274.19   | 137.60 |          |        | 1     |

Query 61577 Hit 1

MS/MS Fragmentation of **DIFGLGPVLLLDATALK**

Found in **sp|Q12894|IFRD2\_HUMAN**, Interferon-related developmental regulator 2 OS=Homo sapiens GN=IFRD2 PE=2 SV=3

Match to Query 61577: 2043.223from(682.0815,3+)

Title: 1302: Scan 2963 (rt=75.553, f=3, i=444) [D:\lab212\membrane\Grace\Joyce\iTRAQ\_24\_1.raw]

Data File: Submitted from 20120508-1(merge) by Mascot Daemon on JOYCE-VAIO

Monoisotopic mass of neutral peptide Mr(calc): 2043.223

Variable modifications:

K17 :iTRAQ4plex (K)

Ions Score: 45.78 Expect: 0.006

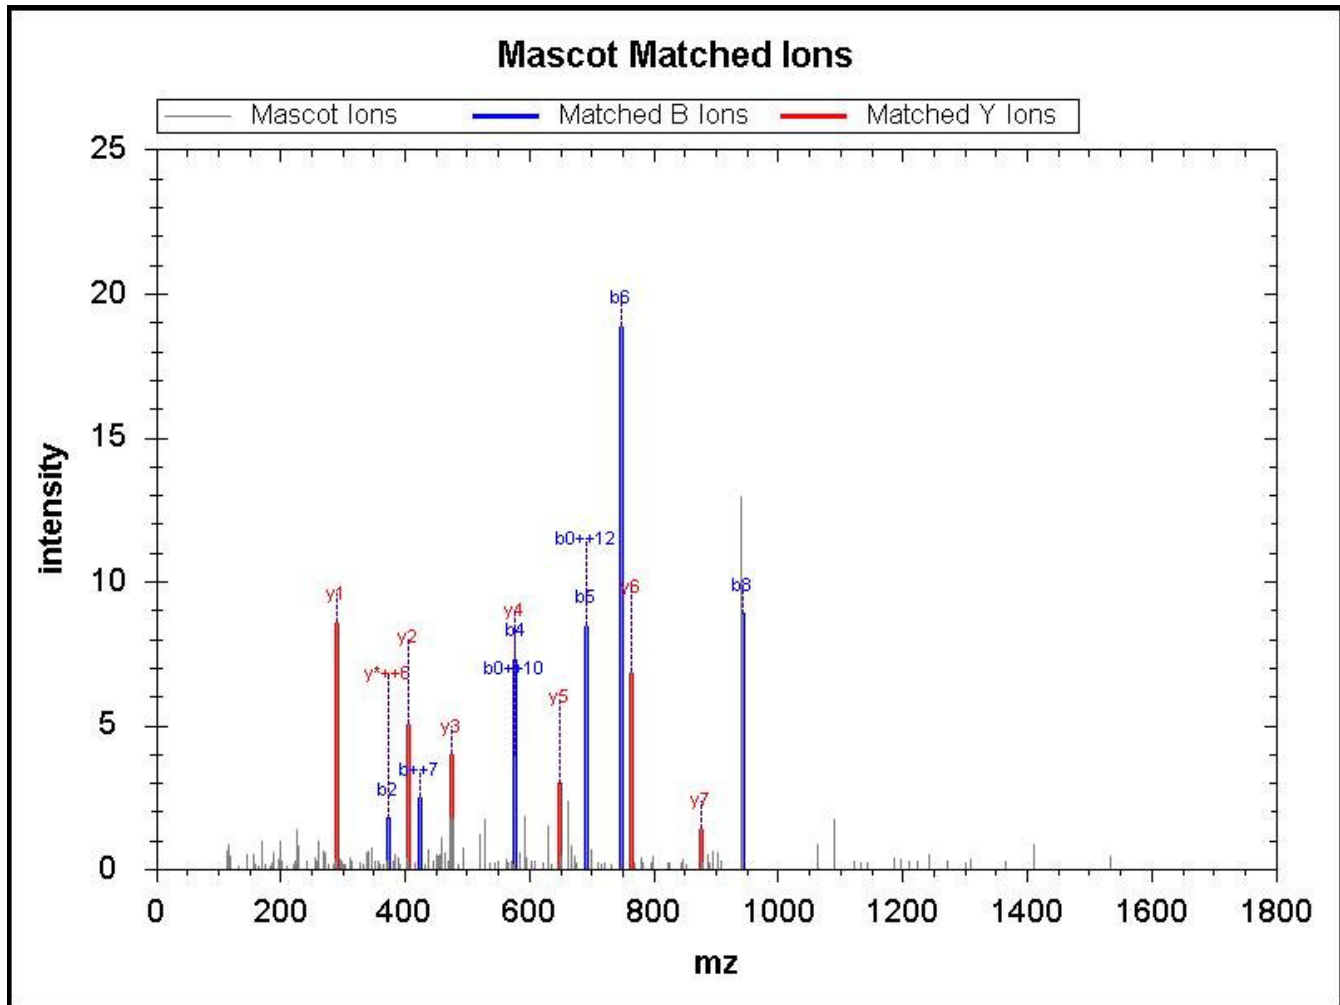

| No | b        | b++    | b0       | b0++   | Seq | y        | y++    | y*       | y*++   | y0       | y0++   | RevNo |
|----|----------|--------|----------|--------|-----|----------|--------|----------|--------|----------|--------|-------|
| 1  | 260.14   | 130.57 | 242.13   | 121.57 | D   |          |        |          |        |          |        | 17    |
| 2  | 373.22   | 187.11 | 355.21   | 178.11 | I   | 1,785.10 | 893.05 | 1,768.07 | 884.54 | 1,767.09 | 884.05 | 16    |
| 3  | 520.29   | 260.65 | 502.28   | 251.64 | F   | 1,672.02 | 836.51 | 1,654.99 | 828.00 | 1,654.01 | 827.51 | 15    |
| 4  | 577.31   | 289.16 | 559.30   | 280.15 | G   | 1,524.95 | 762.98 | 1,507.92 | 754.46 | 1,506.94 | 753.97 | 14    |
| 5  | 690.39   | 345.70 | 672.38   | 336.70 | L   | 1,467.93 | 734.47 | 1,450.90 | 725.95 | 1,449.92 | 725.46 | 13    |
| 6  | 747.42   | 374.21 | 729.41   | 365.21 | G   | 1,354.84 | 677.92 | 1,337.82 | 669.41 | 1,336.83 | 668.92 | 12    |
| 7  | 844.47   | 422.74 | 826.46   | 413.73 | P   | 1,297.82 | 649.41 | 1,280.79 | 640.90 | 1,279.81 | 640.41 | 11    |
| 8  | 943.54   | 472.27 | 925.53   | 463.27 | V   | 1,200.77 | 600.89 | 1,183.74 | 592.37 | 1,182.76 | 591.88 | 10    |
| 9  | 1,056.62 | 528.81 | 1,038.61 | 519.81 | L   | 1,101.70 | 551.35 | 1,084.67 | 542.84 | 1,083.69 | 542.35 | 9     |
| 10 | 1,169.71 | 585.36 | 1,151.69 | 576.35 | L   | 988.62   | 494.81 | 971.59   | 486.30 | 970.61   | 485.81 | 8     |
| 11 | 1,282.79 | 641.90 | 1,264.78 | 632.89 | L   | 875.53   | 438.27 | 858.51   | 429.76 | 857.52   | 429.26 | 7     |
| 12 | 1,397.82 | 699.41 | 1,379.81 | 690.41 | D   | 762.45   | 381.73 | 745.42   | 373.21 | 744.44   | 372.72 | 6     |
| 13 | 1,468.85 | 734.93 | 1,450.84 | 725.93 | A   | 647.42   | 324.21 | 630.39   | 315.70 | 629.41   | 315.21 | 5     |
| 14 | 1,569.90 | 785.45 | 1,551.89 | 776.45 | T   | 576.38   | 288.70 | 559.36   | 280.18 | 558.37   | 279.69 | 4     |
| 15 | 1,640.94 | 820.97 | 1,622.93 | 811.97 | A   | 475.34   | 238.17 | 458.31   | 229.66 |          |        | 3     |
| 16 | 1,754.02 | 877.51 | 1,736.01 | 868.51 | L   | 404.30   | 202.65 | 387.27   | 194.14 |          |        | 2     |
| 17 |          |        |          |        | K   | 291.21   | 146.11 | 274.19   | 137.60 |          |        | 1     |

Query 34518 Hit 1

MS/MS Fragmentation of **NVVALDTEVASNR**

Found in **sp|P01130|LDLR\_HUMAN**, Low-density lipoprotein receptor OS=Homo sapiens GN=LDLR PE=1 SV=1

Match to Query 34518: 1530.807from(766.4107,2+)

Title: 247: Sum of 2 scans in range 1104 (rt=32.1989, f=4, i=159) to 1105 (rt=32.2243, f=4, i=160)

[D:\lab212\membrane\GraceJoyce\20120320\_iTRAQ\_20-2.raw]

Data File:Submitted from 20120508-1(merge) by Mascot Daemon on JOYCE-VAIO

Monoisotopic mass of neutral peptide Mr(calc): 1530.807

Variable modifications:

Ions Score: 45.77 Expect: 0.022

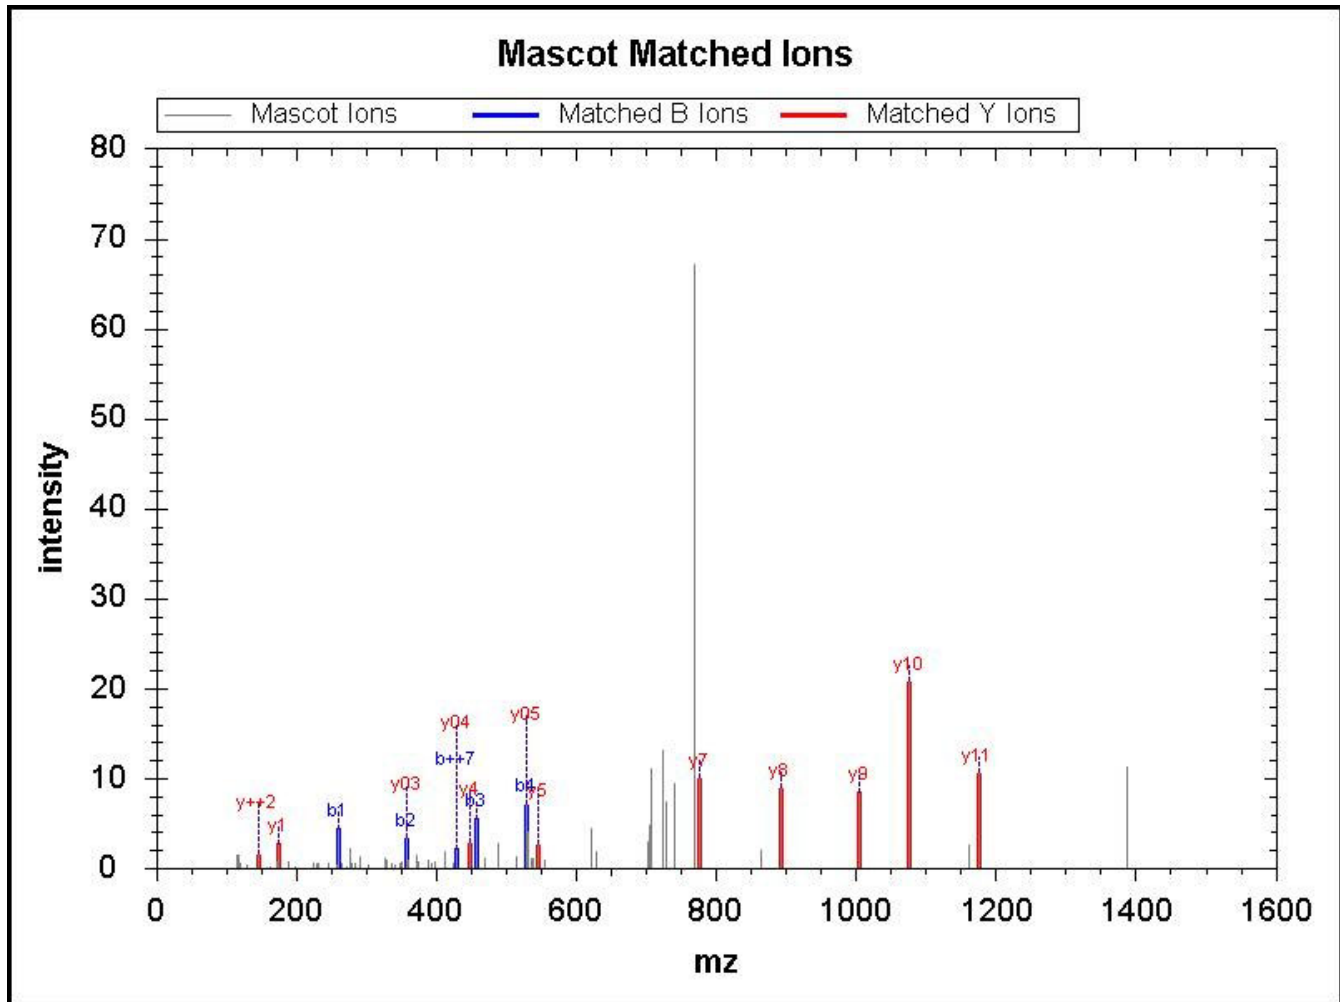

| No | b        | b++    | b*       | b*++   | b0       | b0++   | Seq | y        | y++    | y*       | y*++   | y0       | y0++   | RevNo |
|----|----------|--------|----------|--------|----------|--------|-----|----------|--------|----------|--------|----------|--------|-------|
| 1  | 259.15   | 130.08 | 242.13   | 121.57 |          |        | N   |          |        |          |        |          |        | 13    |
| 2  | 358.22   | 179.61 | 341.19   | 171.10 |          |        | V   | 1,273.67 | 637.34 | 1,256.65 | 628.83 | 1,255.66 | 628.34 | 12    |
| 3  | 457.29   | 229.15 | 440.26   | 220.63 |          |        | V   | 1,174.61 | 587.81 | 1,157.58 | 579.29 | 1,156.60 | 578.80 | 11    |
| 4  | 528.33   | 264.67 | 511.30   | 256.15 |          |        | A   | 1,075.54 | 538.27 | 1,058.51 | 529.76 | 1,057.53 | 529.27 | 10    |
| 5  | 641.41   | 321.21 | 624.38   | 312.70 |          |        | L   | 1,004.50 | 502.75 | 987.47   | 494.24 | 986.49   | 493.75 | 9     |
| 6  | 756.44   | 378.72 | 739.41   | 370.21 | 738.43   | 369.72 | D   | 891.42   | 446.21 | 874.39   | 437.70 | 873.41   | 437.21 | 8     |
| 7  | 857.48   | 429.25 | 840.46   | 420.73 | 839.47   | 420.24 | T   | 776.39   | 388.70 | 759.36   | 380.19 | 758.38   | 379.69 | 7     |
| 8  | 986.53   | 493.77 | 969.50   | 485.25 | 968.52   | 484.76 | E   | 675.34   | 338.17 | 658.32   | 329.66 | 657.33   | 329.17 | 6     |
| 9  | 1,085.60 | 543.30 | 1,068.57 | 534.79 | 1,067.59 | 534.30 | V   | 546.30   | 273.65 | 529.27   | 265.14 | 528.29   | 264.65 | 5     |
| 10 | 1,156.63 | 578.82 | 1,139.61 | 570.31 | 1,138.62 | 569.81 | A   | 447.23   | 224.12 | 430.20   | 215.61 | 429.22   | 215.11 | 4     |
| 11 | 1,243.67 | 622.34 | 1,226.64 | 613.82 | 1,225.65 | 613.33 | S   | 376.19   | 188.60 | 359.17   | 180.09 | 358.18   | 179.60 | 3     |
| 12 | 1,357.71 | 679.36 | 1,340.68 | 670.84 | 1,339.70 | 670.35 | N   | 289.16   | 145.08 | 272.14   | 136.57 |          |        | 2     |
| 13 |          |        |          |        |          |        | R   | 175.12   | 88.06  | 158.09   | 79.55  |          |        | 1     |

Query 72827 Hit 1

MS/MS Fragmentation of **SIFNSAMQEMEVYVENIR**

Found in **sp|Q9ULU4|PKCB1\_HUMAN**, Protein kinase C-binding protein 1 OS=Homo sapiens GN=ZMYND8 PE=1 SV=2

Match to Query 72827: 2303.105from(768.709,3+)

Title: 1233: Sum of 2 scans in range 2894 (rt=73.5931, f=4, i=815) to 2895 (rt=73.6185, f=4, i=816)

[D:\lab212\membrane\GraceJoyce\iTRAQ\_23\_2.raw]

Data File: Submitted from 20120508-1(merge) by Mascot Daemon on JOYCE-VAIO

Monoisotopic mass of neutral peptide Mr(calc): 2303.105

Variable modifications:

Ions Score: 45.66 Expect: 0.023

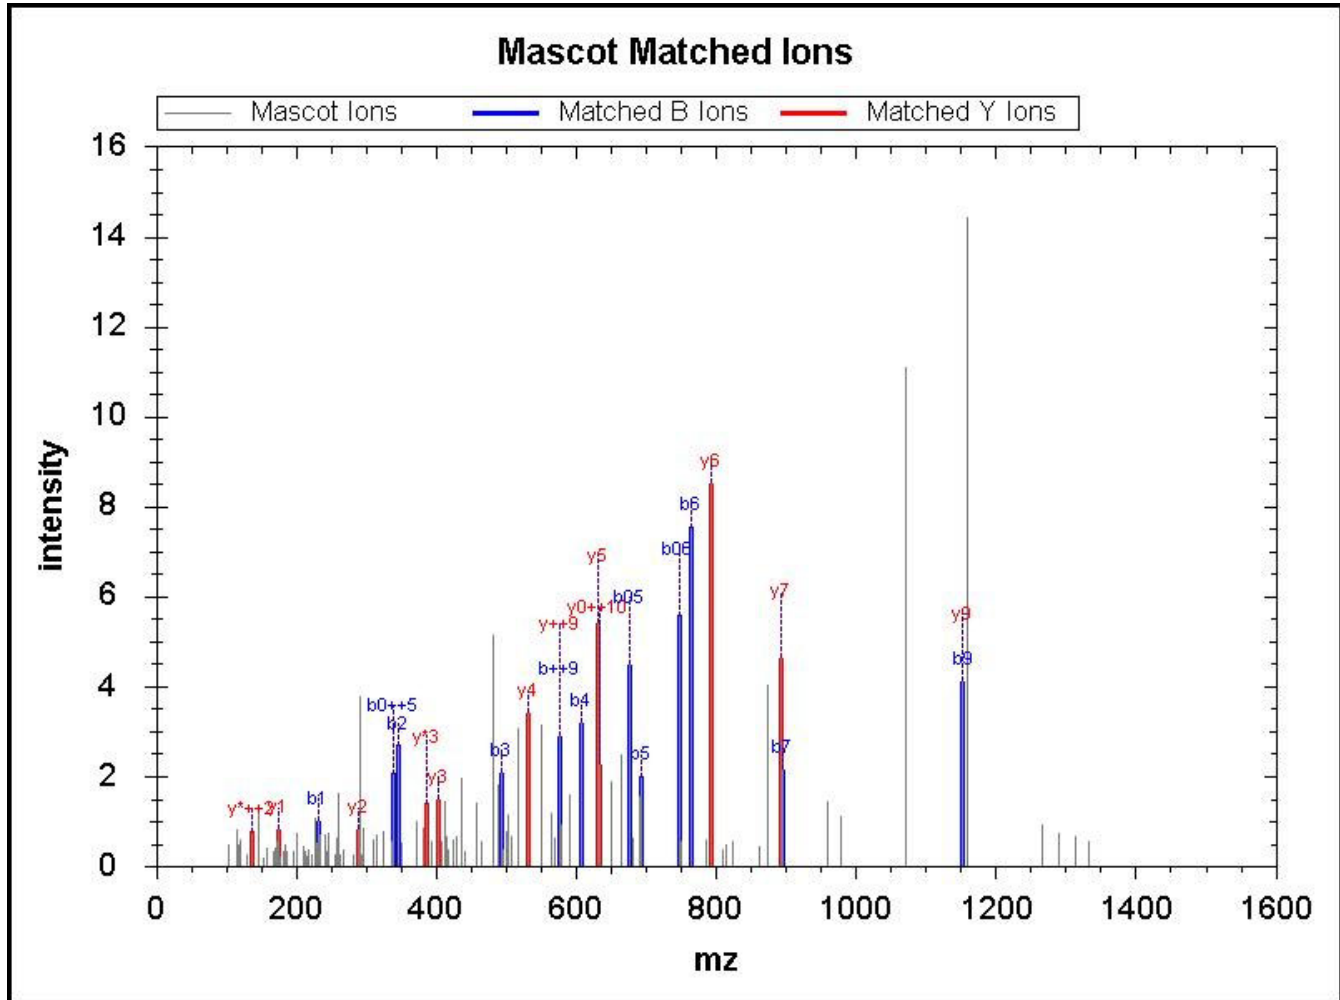

| No | b        | b++      | b*       | b*++     | b0       | b0++   | Seq | y        | y++      | y*       | y*++     | y0       | y0++     | RevNo |
|----|----------|----------|----------|----------|----------|--------|-----|----------|----------|----------|----------|----------|----------|-------|
| 1  | 232.14   | 116.57   |          |          | 214.13   | 107.57 | S   |          |          |          |          |          |          | 18    |
| 2  | 345.23   | 173.12   |          |          | 327.21   | 164.11 | I   | 2,072.98 | 1,036.99 | 2,055.95 | 1,028.48 | 2,054.97 | 1,027.99 | 17    |
| 3  | 492.29   | 246.65   |          |          | 474.28   | 237.65 | F   | 1,959.89 | 980.45   | 1,942.87 | 971.94   | 1,941.88 | 971.45   | 16    |
| 4  | 606.34   | 303.67   | 589.31   | 295.16   | 588.33   | 294.67 | N   | 1,812.83 | 906.92   | 1,795.80 | 898.40   | 1,794.81 | 897.91   | 15    |
| 5  | 693.37   | 347.19   | 676.34   | 338.67   | 675.36   | 338.18 | S   | 1,698.78 | 849.89   | 1,681.76 | 841.38   | 1,680.77 | 840.89   | 14    |
| 6  | 764.41   | 382.71   | 747.38   | 374.19   | 746.40   | 373.70 | A   | 1,611.75 | 806.38   | 1,594.72 | 797.87   | 1,593.74 | 797.37   | 13    |
| 7  | 895.45   | 448.23   | 878.42   | 439.71   | 877.44   | 439.22 | M   | 1,540.71 | 770.86   | 1,523.69 | 762.35   | 1,522.70 | 761.86   | 12    |
| 8  | 1,023.50 | 512.26   | 1,006.48 | 503.74   | 1,005.49 | 503.25 | Q   | 1,409.67 | 705.34   | 1,392.65 | 696.83   | 1,391.66 | 696.33   | 11    |
| 9  | 1,152.55 | 576.78   | 1,135.52 | 568.26   | 1,134.54 | 567.77 | E   | 1,281.61 | 641.31   | 1,264.59 | 632.80   | 1,263.60 | 632.31   | 10    |
| 10 | 1,283.59 | 642.30   | 1,266.56 | 633.78   | 1,265.58 | 633.29 | M   | 1,152.57 | 576.79   | 1,135.55 | 568.28   | 1,134.56 | 567.78   | 9     |
| 11 | 1,412.63 | 706.82   | 1,395.60 | 698.31   | 1,394.62 | 697.81 | E   | 1,021.53 | 511.27   | 1,004.50 | 502.76   | 1,003.52 | 502.26   | 8     |
| 12 | 1,511.70 | 756.35   | 1,494.67 | 747.84   | 1,493.69 | 747.35 | V   | 892.49   | 446.75   | 875.46   | 438.23   | 874.48   | 437.74   | 7     |
| 13 | 1,674.76 | 837.88   | 1,657.74 | 829.37   | 1,656.75 | 828.88 | Y   | 793.42   | 397.21   | 776.39   | 388.70   | 775.41   | 388.21   | 6     |
| 14 | 1,773.83 | 887.42   | 1,756.80 | 878.91   | 1,755.82 | 878.41 | V   | 630.36   | 315.68   | 613.33   | 307.17   | 612.35   | 306.68   | 5     |
| 15 | 1,902.87 | 951.94   | 1,885.85 | 943.43   | 1,884.86 | 942.94 | E   | 531.29   | 266.15   | 514.26   | 257.63   | 513.28   | 257.14   | 4     |
| 16 | 2,016.92 | 1,008.96 | 1,999.89 | 1,000.45 | 1,998.91 | 999.96 | N   | 402.25   | 201.63   | 385.22   | 193.11   |          |          | 3     |

|    |          |          |          |          |          |          |   |        |        |        |        |  |  |   |
|----|----------|----------|----------|----------|----------|----------|---|--------|--------|--------|--------|--|--|---|
| 17 | 2,130.00 | 1,065.50 | 2,112.97 | 1,056.99 | 2,111.99 | 1,056.50 | I | 288.20 | 144.61 | 271.18 | 136.09 |  |  | 2 |
| 18 |          |          |          |          |          |          | R | 175.12 | 88.06  | 158.09 | 79.55  |  |  | 1 |

Query 46275 Hit 1

MS/MS Fragmentation of **RVPVLGSLNLPGIR**

Found in **sp|Q9Y3E0|GOT1B\_HUMAN**, Vesicle transport protein GOT1B OS=Homo sapiens GN=GOLT1B PE=1 SV=1

Match to Query 46275: 1747.097from(583.3729,3+)

Title: 983: Sum of 2 scans in range 2169 (rt=58.3711, f=4, i=657) to 2170 (rt=58.3965, f=4, i=658)

[D:\lab212\membrane\GraceJoyce\iTRAQ\_39\_1.raw]

Data File:Submitted from 20120508-1(merge) by Mascot Daemon on JOYCE-VAIO

Monoisotopic mass of neutral peptide Mr(calc): 1747.097

Variable modifications:

Ions Score: 45.65 Expect: 0.005

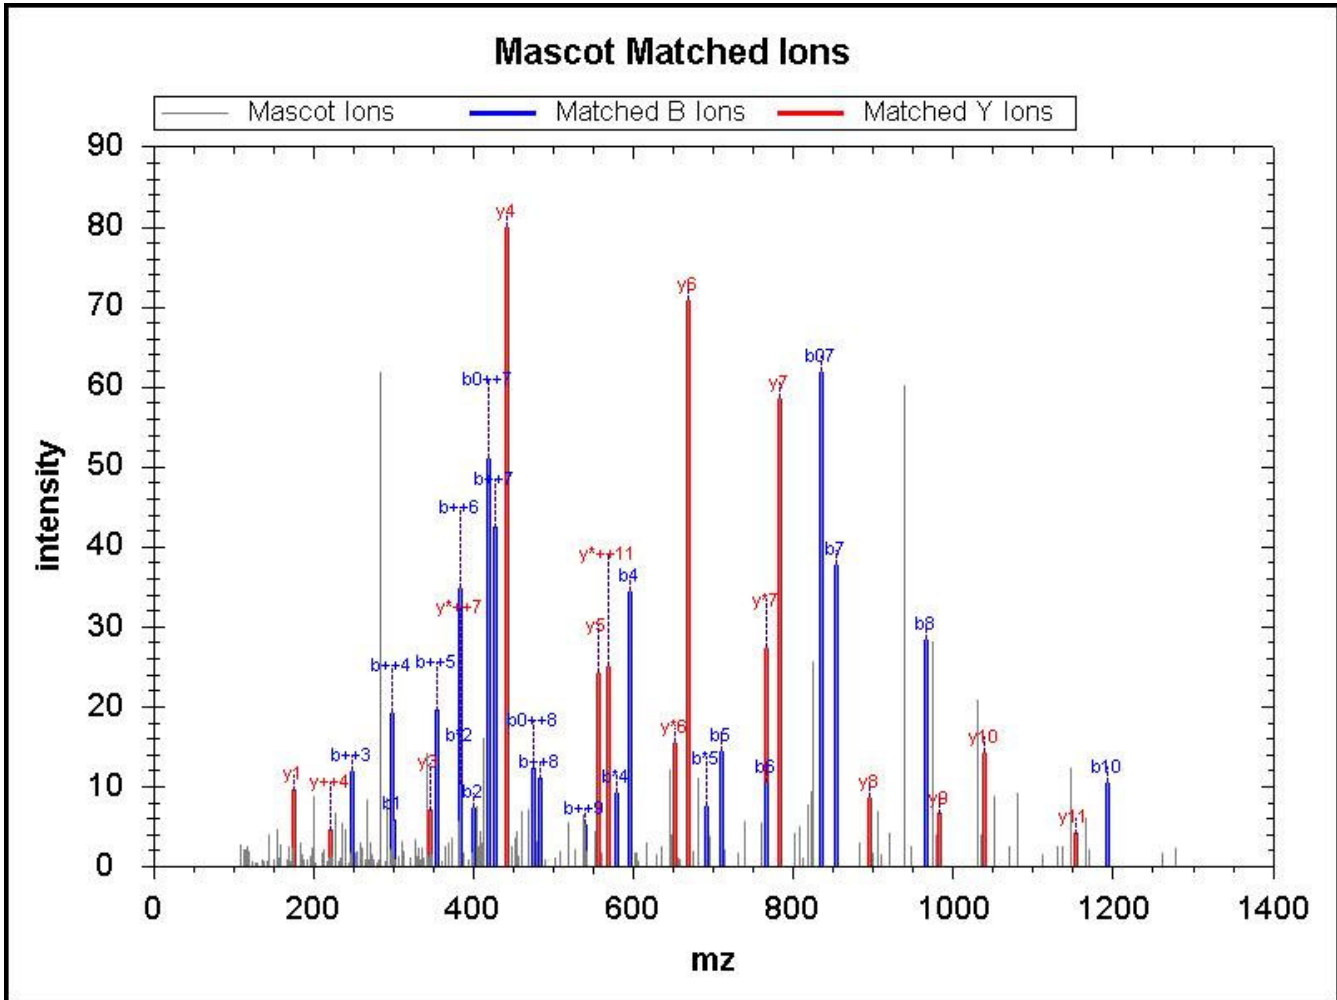



|    |          |        |          |        |          |        |   |        |        |        |        |  |  |   |
|----|----------|--------|----------|--------|----------|--------|---|--------|--------|--------|--------|--|--|---|
| 13 | 1,460.91 | 730.96 | 1,443.88 | 722.44 | 1,442.90 | 721.95 | G | 345.22 | 173.12 | 328.20 | 164.60 |  |  | 3 |
| 14 | 1,573.99 | 787.50 | 1,556.96 | 778.99 | 1,555.98 | 778.49 | I | 288.20 | 144.61 | 271.18 | 136.09 |  |  | 2 |
| 15 |          |        |          |        |          |        | R | 175.12 | 88.06  | 158.09 | 79.55  |  |  | 1 |

Query 67781 Hit 1

MS/MS Fragmentation of **VLGHVNNILISAVLPTAFR**

Found in **sp|Q8TB36|GDAP1\_HUMAN**, Ganglioside-induced differentiation-associated protein 1 OS=Homo sapiens GN=GDAP1 PE=1 SV=3

Match to Query 67781: 2177.28from(726.7671,3+)

Title: 1031: Scan 2230 (rt=59.9095, f=3, i=347) [D:\lab212\membrane\Grace\Joyce\iTRAQ\_33\_2.raw]

Data File:Submitted from 20120508-1(merge) by Mascot Daemon on JOYCE-VAIO

Monoisotopic mass of neutral peptide Mr(calc): 2177.28

Variable modifications:

Ions Score: 45.63 Expect: 0.008

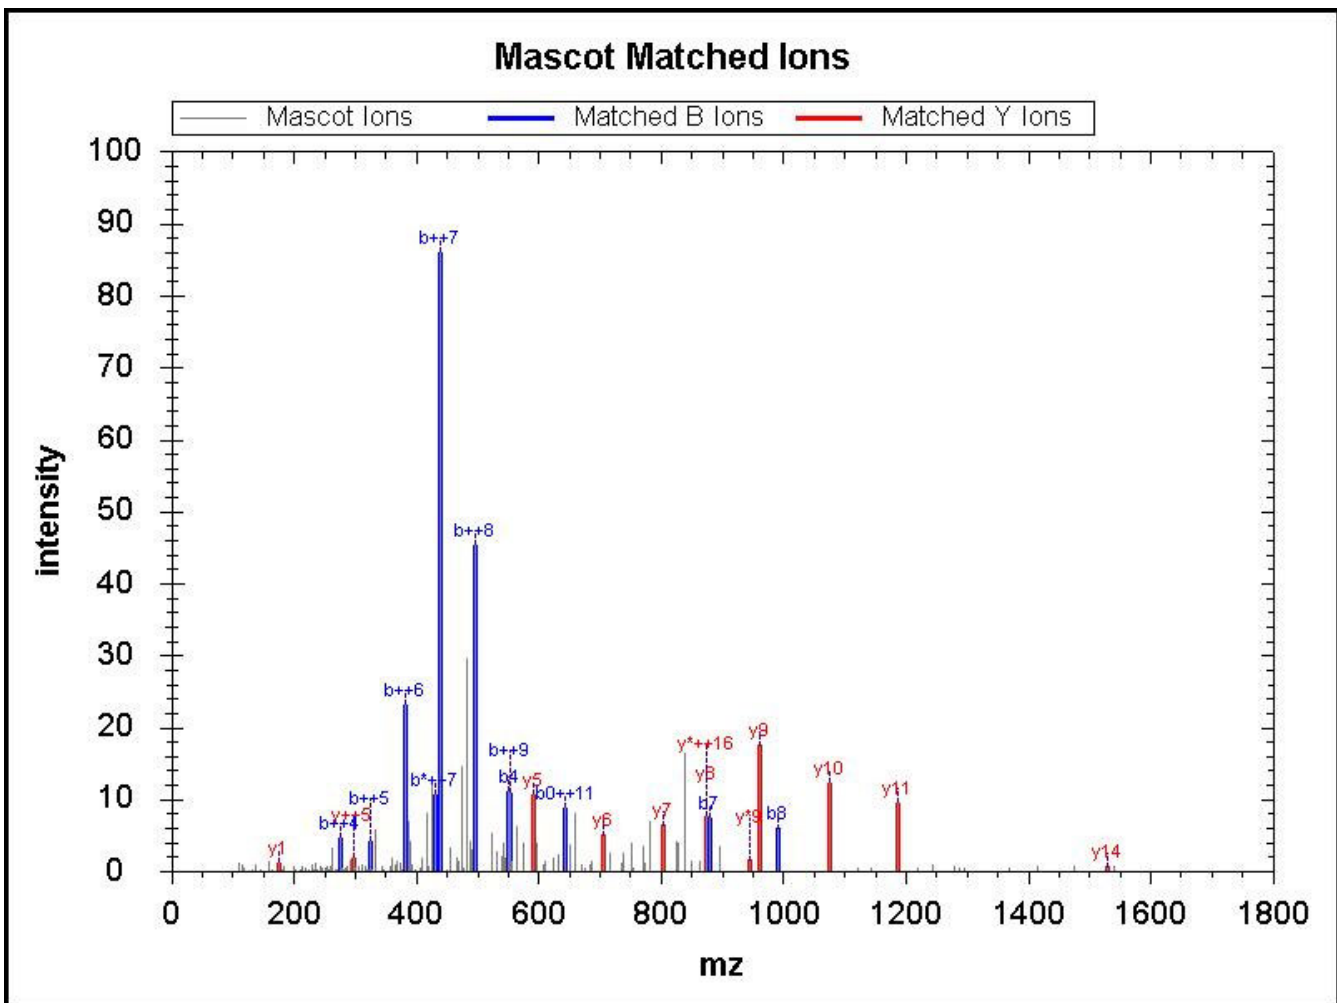

| No | b        | b++    | b*       | b*++   | b0 | b0++ | Seq | y        | y++    | y*       | y*++   | y0       | y0++   | RevNo |
|----|----------|--------|----------|--------|----|------|-----|----------|--------|----------|--------|----------|--------|-------|
| 1  | 244.18   | 122.59 |          |        |    |      | V   |          |        |          |        |          |        | 19    |
| 2  | 357.26   | 179.13 |          |        |    |      | L   | 1,935.12 | 968.06 | 1,918.09 | 959.55 | 1,917.11 | 959.06 | 18    |
| 3  | 414.28   | 207.65 |          |        |    |      | G   | 1,822.03 | 911.52 | 1,805.01 | 903.01 | 1,804.02 | 902.52 | 17    |
| 4  | 551.34   | 276.17 |          |        |    |      | H   | 1,765.01 | 883.01 | 1,747.99 | 874.50 | 1,747.00 | 874.00 | 16    |
| 5  | 650.41   | 325.71 |          |        |    |      | V   | 1,627.95 | 814.48 | 1,610.93 | 805.97 | 1,609.94 | 805.47 | 15    |
| 6  | 764.45   | 382.73 | 747.43   | 374.22 |    |      | N   | 1,528.88 | 764.95 | 1,511.86 | 756.43 | 1,510.87 | 755.94 | 14    |
| 7  | 878.50   | 439.75 | 861.47   | 431.24 |    |      | N   | 1,414.84 | 707.92 | 1,397.82 | 699.41 | 1,396.83 | 698.92 | 13    |
| 8  | 991.58   | 496.29 | 974.55   | 487.78 |    |      | I   | 1,300.80 | 650.90 | 1,283.77 | 642.39 | 1,282.79 | 641.90 | 12    |
| 9  | 1,104.66 | 552.84 | 1,087.64 | 544.32 |    |      | L   | 1,187.71 | 594.36 | 1,170.69 | 585.85 | 1,169.70 | 585.36 | 11    |
| 10 | 1,217.75 | 609.38 | 1,200.72 | 600.86 |    |      | I   | 1,074.63 | 537.82 | 1,057.60 | 529.31 | 1,056.62 | 528.81 | 10    |

|    |          |          |          |        |          |        |   |        |        |        |        |        |        |   |
|----|----------|----------|----------|--------|----------|--------|---|--------|--------|--------|--------|--------|--------|---|
| 11 | 1,304.78 | 652.89   | 1,287.75 | 644.38 | 1,286.77 | 643.89 | S | 961.55 | 481.28 | 944.52 | 472.76 | 943.54 | 472.27 | 9 |
| 12 | 1,375.82 | 688.41   | 1,358.79 | 679.90 | 1,357.81 | 679.41 | A | 874.51 | 437.76 | 857.49 | 429.25 | 856.50 | 428.76 | 8 |
| 13 | 1,474.89 | 737.95   | 1,457.86 | 729.43 | 1,456.88 | 728.94 | V | 803.48 | 402.24 | 786.45 | 393.73 | 785.47 | 393.24 | 7 |
| 14 | 1,587.97 | 794.49   | 1,570.94 | 785.98 | 1,569.96 | 785.48 | L | 704.41 | 352.71 | 687.38 | 344.19 | 686.40 | 343.70 | 6 |
| 15 | 1,685.02 | 843.02   | 1,668.00 | 834.50 | 1,667.01 | 834.01 | P | 591.32 | 296.17 | 574.30 | 287.65 | 573.31 | 287.16 | 5 |
| 16 | 1,786.07 | 893.54   | 1,769.04 | 885.03 | 1,768.06 | 884.53 | T | 494.27 | 247.64 | 477.25 | 239.13 | 476.26 | 238.63 | 4 |
| 17 | 1,857.11 | 929.06   | 1,840.08 | 920.54 | 1,839.10 | 920.05 | A | 393.22 | 197.12 | 376.20 | 188.60 |        |        | 3 |
| 18 | 2,004.18 | 1,002.59 | 1,987.15 | 994.08 | 1,986.17 | 993.59 | F | 322.19 | 161.60 | 305.16 | 153.08 |        |        | 2 |
| 19 |          |          |          |        |          |        | R | 175.12 | 88.06  | 158.09 | 79.55  |        |        | 1 |

Query 77791 Hit 1

MS/MS Fragmentation of **LWNKDPLTGILYQINSK**

Found in [sp|Q61830|MRC1\\_MOUSE](#), Macrophage mannose receptor 1 OS=Mus musculus GN=Mrc1 PE=1 SV=2

Match to Query 77791: 2434.392from(812.4713,3+)

Title: 738: Sum of 2 scans in range 2282 (rt=58.4707, f=4, i=479) to 2283 (rt=58.4962, f=4, i=480)

[D:\lab212\membrane\GraceJoyce\iTRAQ\_43\_2.raw]

Data File: Submitted from 20120508-1(merge) by Mascot Daemon on JOYCE-VAIO

Monoisotopic mass of neutral peptide Mr(calc): 2434.392

Variable modifications:

K4 :iTRAQ4plex (K)

K17 :iTRAQ4plex (K)

Ions Score: 45.6 Expect: 0.010

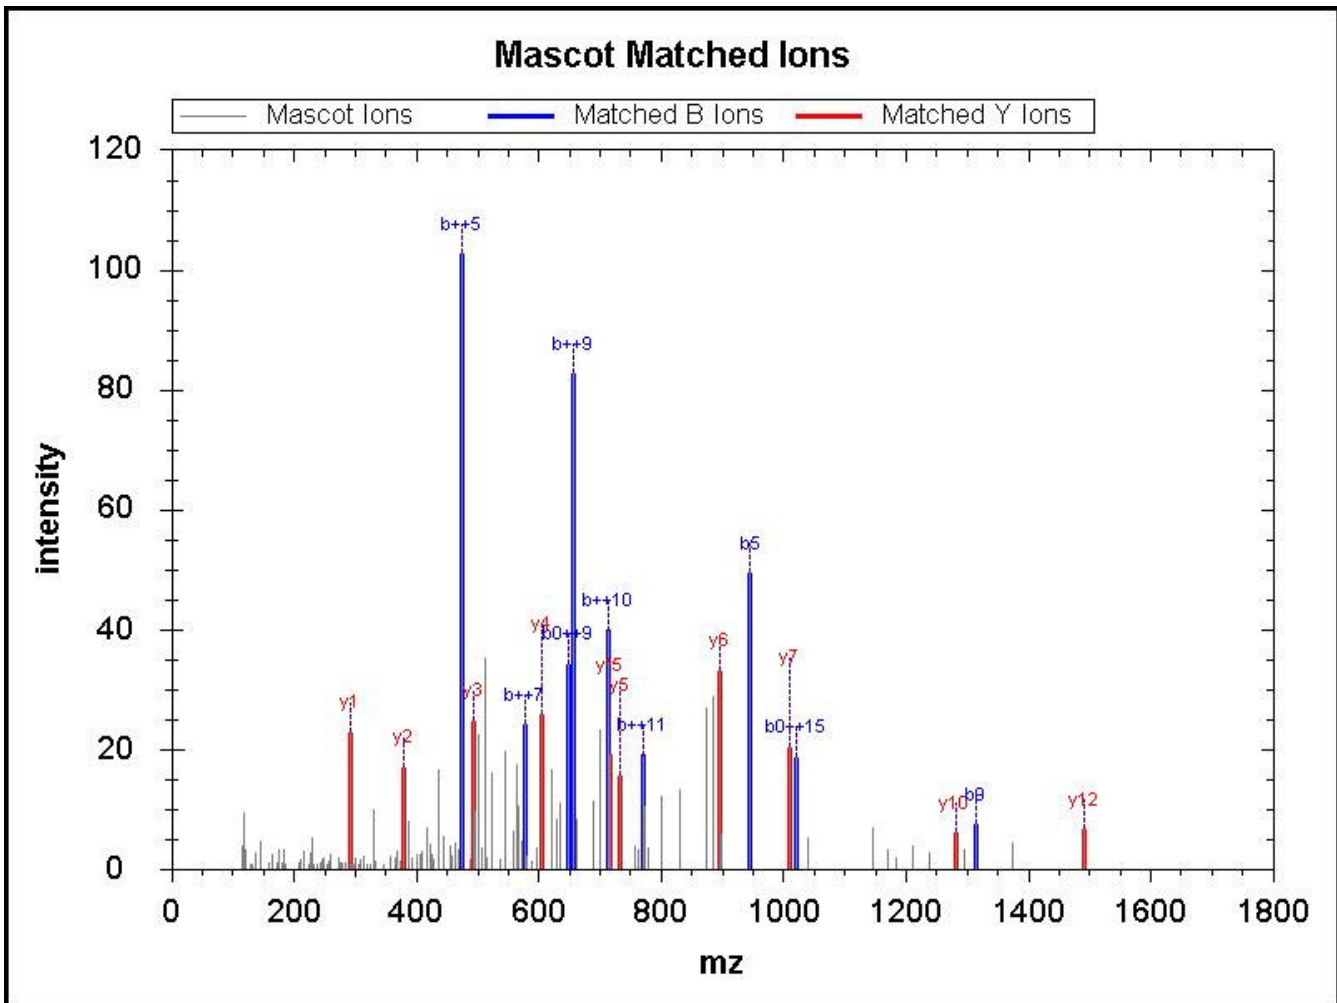

| No | b      | b++    | b*     | b*++   | b0 | b0++ | Seq | y        | y++      | y*       | y*++     | y0       | y0++     | RevNo |
|----|--------|--------|--------|--------|----|------|-----|----------|----------|----------|----------|----------|----------|-------|
| 1  | 258.19 | 129.60 |        |        |    |      | L   |          |          |          |          |          |          | 17    |
| 2  | 444.27 | 222.64 |        |        |    |      | W   | 2,178.22 | 1,089.61 | 2,161.19 | 1,081.10 | 2,160.21 | 1,080.61 | 16    |
| 3  | 558.32 | 279.66 | 541.29 | 271.15 |    |      | N   | 1,992.14 | 996.57   | 1,975.11 | 988.06   | 1,974.13 | 987.57   | 15    |
| 4  | 830.51 | 415.76 | 813.49 | 407.25 |    |      | K   | 1,878.09 | 939.55   | 1,861.07 | 931.04   | 1,860.08 | 930.55   | 14    |



|    |        |        |        |        |   |          |        |          |        |          |        |  |    |
|----|--------|--------|--------|--------|---|----------|--------|----------|--------|----------|--------|--|----|
| 1  | 88.04  | 44.52  | 70.03  | 35.52  | S |          |        |          |        |          |        |  | 10 |
| 2  | 145.06 | 73.03  | 127.05 | 64.03  | G | 1,059.65 | 530.33 | 1,042.63 | 521.82 | 1,041.64 | 521.32 |  | 9  |
| 3  | 258.14 | 129.58 | 240.13 | 120.57 | L | 1,002.63 | 501.82 | 985.60   | 493.31 | 984.62   | 492.81 |  | 8  |
| 4  | 345.18 | 173.09 | 327.17 | 164.09 | S | 889.55   | 445.28 | 872.52   | 436.76 | 871.54   | 436.27 |  | 7  |
| 5  | 460.20 | 230.61 | 442.19 | 221.60 | D | 802.52   | 401.76 | 785.49   | 393.25 | 784.50   | 392.76 |  | 6  |
| 6  | 573.29 | 287.15 | 555.28 | 278.14 | I | 687.49   | 344.25 | 670.46   | 335.73 |          |        |  | 5  |
| 7  | 686.37 | 343.69 | 668.36 | 334.68 | I | 574.40   | 287.71 | 557.38   | 279.19 |          |        |  | 4  |
| 8  | 799.46 | 400.23 | 781.45 | 391.23 | L | 461.32   | 231.16 | 444.29   | 222.65 |          |        |  | 3  |
| 9  | 856.48 | 428.74 | 838.47 | 419.74 | G | 348.24   | 174.62 | 331.21   | 166.11 |          |        |  | 2  |
| 10 |        |        |        |        | K | 291.21   | 146.11 | 274.19   | 137.60 |          |        |  | 1  |

Query 57686 Hit 1

MS/MS Fragmentation of **GMGLVNHVFTEDNLK**

Found in [sp|Q06203|PUR1\\_HUMAN](#), Amidophosphoribosyltransferase OS=Homo sapiens GN=PPAT PE=1 SV=1

Match to Query 57686: 1961.028from(654.6834,3+)

Title: 646: Scan 1431 (rt=41.9167, f=3, i=224) [D:\lab212\membrane\Grace\Joyce\iTRAQ\_40\_1.raw]

Data File: Submitted from 20120508-1(merge) by Mascot Daemon on JOYCE-VAIO

Monoisotopic mass of neutral peptide Mr(calc): 1961.028

Variable modifications:

K15 iTRAQ4plex (K)

Ions Score: 45.52 Expect: 0.026

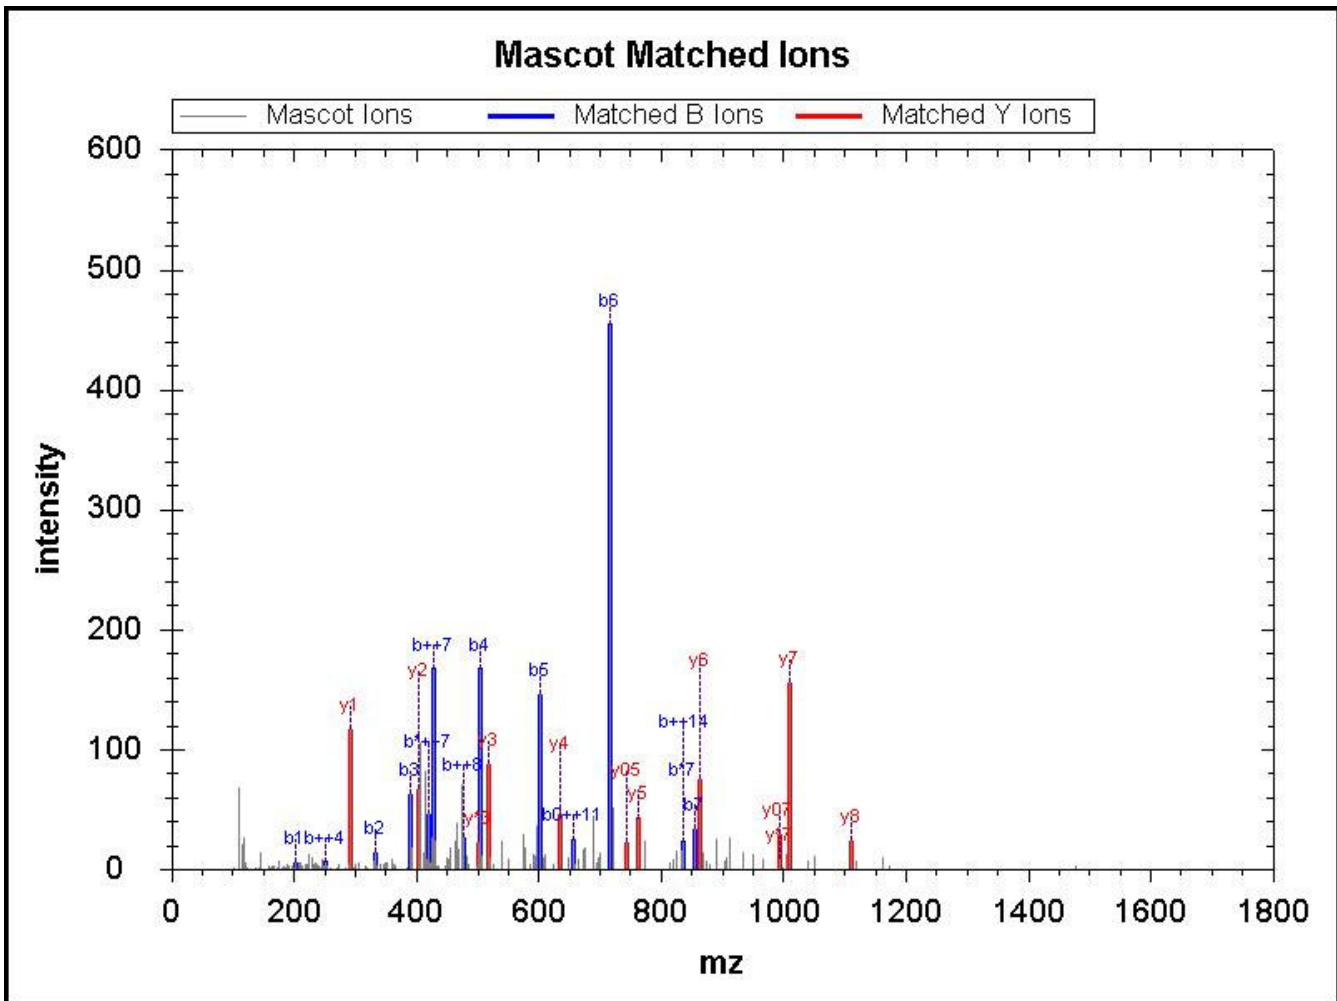

|    |          |        |          |        |          |        |   |          |        |          |        |          |        |    |
|----|----------|--------|----------|--------|----------|--------|---|----------|--------|----------|--------|----------|--------|----|
| 5  | 602.35   | 301.68 |          |        |          |        | V | 1,459.77 | 730.39 | 1,442.74 | 721.87 | 1,441.76 | 721.38 | 11 |
| 6  | 716.39   | 358.70 | 699.36   | 350.18 |          |        | N | 1,360.70 | 680.85 | 1,343.67 | 672.34 | 1,342.69 | 671.85 | 10 |
| 7  | 853.45   | 427.23 | 836.42   | 418.71 |          |        | H | 1,246.65 | 623.83 | 1,229.63 | 615.32 | 1,228.64 | 614.83 | 9  |
| 8  | 952.52   | 476.76 | 935.49   | 468.25 |          |        | V | 1,109.60 | 555.30 | 1,092.57 | 546.79 | 1,091.59 | 546.30 | 8  |
| 9  | 1,099.58 | 550.30 | 1,082.56 | 541.78 |          |        | F | 1,010.53 | 505.77 | 993.50   | 497.25 | 992.52   | 496.76 | 7  |
| 10 | 1,200.63 | 600.82 | 1,183.61 | 592.31 | 1,182.62 | 591.81 | T | 863.46   | 432.23 | 846.43   | 423.72 | 845.45   | 423.23 | 6  |
| 11 | 1,329.67 | 665.34 | 1,312.65 | 656.83 | 1,311.66 | 656.34 | E | 762.41   | 381.71 | 745.38   | 373.20 | 744.40   | 372.70 | 5  |
| 12 | 1,444.70 | 722.85 | 1,427.67 | 714.34 | 1,426.69 | 713.85 | D | 633.37   | 317.19 | 616.34   | 308.67 | 615.36   | 308.18 | 4  |
| 13 | 1,558.74 | 779.88 | 1,541.72 | 771.36 | 1,540.73 | 770.87 | N | 518.34   | 259.67 | 501.32   | 251.16 |          |        | 3  |
| 14 | 1,671.83 | 836.42 | 1,654.80 | 827.90 | 1,653.82 | 827.41 | L | 404.30   | 202.65 | 387.27   | 194.14 |          |        | 2  |
| 15 |          |        |          |        |          |        | K | 291.21   | 146.11 | 274.19   | 137.60 |          |        | 1  |

Query 79330 Hit 1

MS/MS Fragmentation of **QMNAFLEGFTELLPIDLIK**

Found in **sp|Q96PU5|NED4L\_HUMAN**, E3 ubiquitin-protein ligase NEDD4-like OS=Homo sapiens GN=NEDD4L PE=1 SV=2

Match to Query 79330: 2479.369from(827.4637,3+)

Title: 1216: Sum of 2 scans in range 3390 (rt=82.1473, f=2, i=467) to 3391 (rt=82.1727, f=2, i=468)

[D:\lab212\membrane\GraceJoyce\iTRAQ\_25\_1.raw]

Data File: Submitted from 20120508-1(merge) by Mascot Daemon on JOYCE-VAIO

Monoisotopic mass of neutral peptide Mr(calc): 2479.369

Variable modifications:

K19 iTRAQ4plex (K)

Ions Score: 45.51 Expect: 0.016

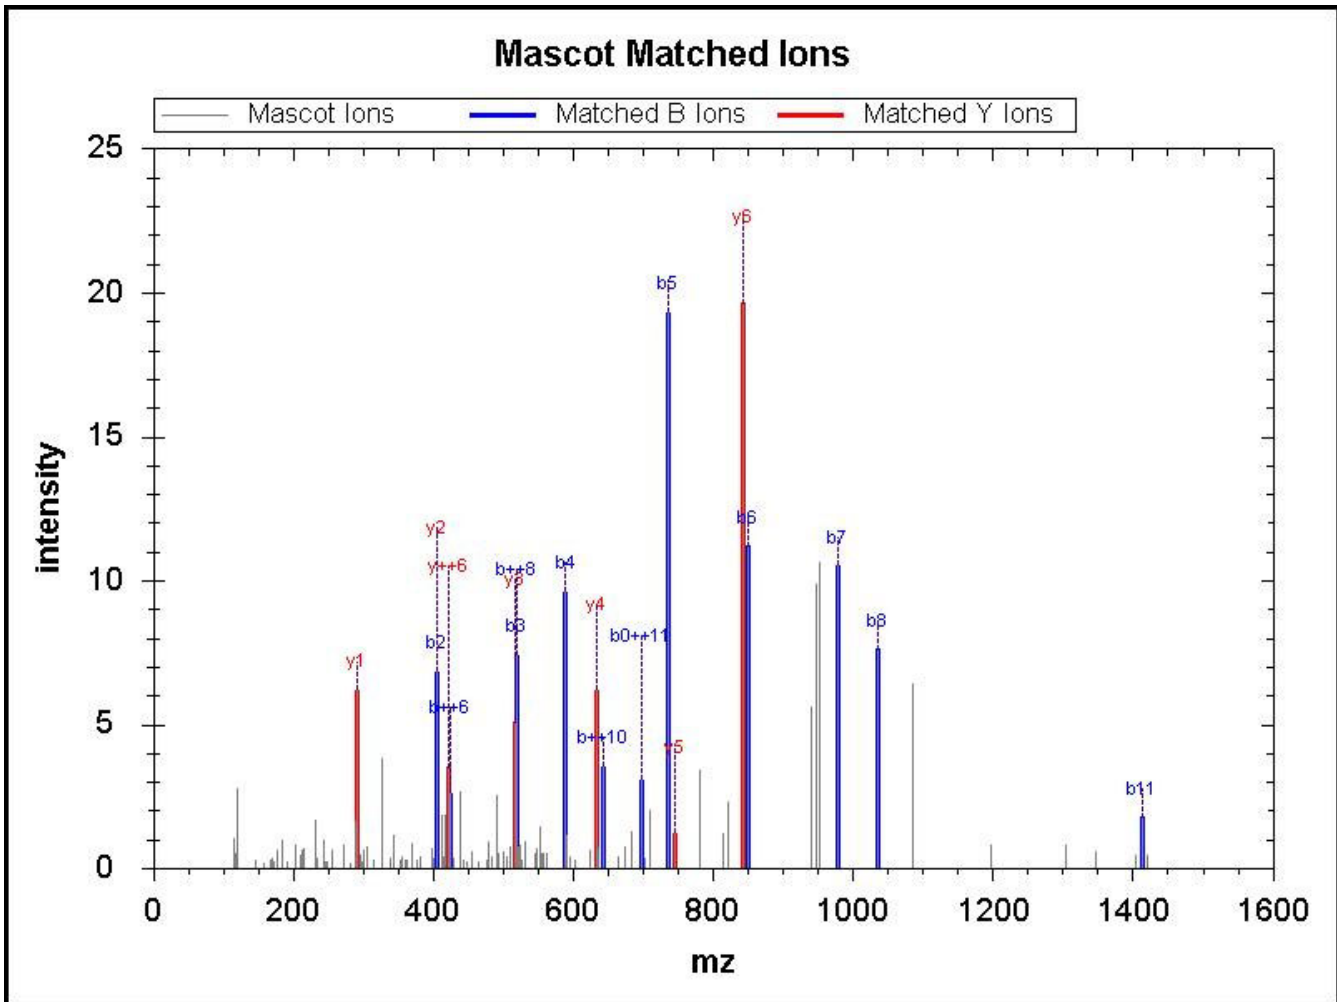

| No | b      | b++    | b*     | b*++   | b0 | b0++ | Seq | y        | y++      | y*       | y*++     | y0       | y0++     | RevNo |
|----|--------|--------|--------|--------|----|------|-----|----------|----------|----------|----------|----------|----------|-------|
| 1  | 273.17 | 137.09 | 256.14 | 128.57 |    |      | Q   |          |          |          |          |          |          | 19    |
| 2  | 404.21 | 202.61 | 387.18 | 194.09 |    |      | M   | 2,208.21 | 1,104.61 | 2,191.18 | 1,096.10 | 2,190.20 | 1,095.60 | 18    |

|    |          |          |          |          |          |          |   |          |          |          |          |          |          |    |
|----|----------|----------|----------|----------|----------|----------|---|----------|----------|----------|----------|----------|----------|----|
| 3  | 518.25   | 259.63   | 501.22   | 251.12   |          |          | N | 2,077.17 | 1,039.09 | 2,060.14 | 1,030.58 | 2,059.16 | 1,030.08 | 17 |
| 4  | 589.29   | 295.15   | 572.26   | 286.63   |          |          | A | 1,963.13 | 982.07   | 1,946.10 | 973.55   | 1,945.12 | 973.06   | 16 |
| 5  | 736.36   | 368.68   | 719.33   | 360.17   |          |          | F | 1,892.09 | 946.55   | 1,875.06 | 938.04   | 1,874.08 | 937.54   | 15 |
| 6  | 849.44   | 425.22   | 832.41   | 416.71   |          |          | L | 1,745.02 | 873.01   | 1,728.00 | 864.50   | 1,727.01 | 864.01   | 14 |
| 7  | 978.48   | 489.75   | 961.46   | 481.23   | 960.47   | 480.74   | E | 1,631.94 | 816.47   | 1,614.91 | 807.96   | 1,613.93 | 807.47   | 13 |
| 8  | 1,035.51 | 518.26   | 1,018.48 | 509.74   | 1,017.49 | 509.25   | G | 1,502.90 | 751.95   | 1,485.87 | 743.44   | 1,484.88 | 742.95   | 12 |
| 9  | 1,182.57 | 591.79   | 1,165.55 | 583.28   | 1,164.56 | 582.79   | F | 1,445.87 | 723.44   | 1,428.85 | 714.93   | 1,427.86 | 714.44   | 11 |
| 10 | 1,283.62 | 642.31   | 1,266.59 | 633.80   | 1,265.61 | 633.31   | T | 1,298.81 | 649.91   | 1,281.78 | 641.39   | 1,280.79 | 640.90   | 10 |
| 11 | 1,412.66 | 706.84   | 1,395.64 | 698.32   | 1,394.65 | 697.83   | E | 1,197.76 | 599.38   | 1,180.73 | 590.87   | 1,179.75 | 590.38   | 9  |
| 12 | 1,525.75 | 763.38   | 1,508.72 | 754.86   | 1,507.74 | 754.37   | L | 1,068.71 | 534.86   | 1,051.69 | 526.35   | 1,050.70 | 525.86   | 8  |
| 13 | 1,638.83 | 819.92   | 1,621.81 | 811.41   | 1,620.82 | 810.91   | L | 955.63   | 478.32   | 938.60   | 469.81   | 937.62   | 469.31   | 7  |
| 14 | 1,735.88 | 868.45   | 1,718.86 | 859.93   | 1,717.87 | 859.44   | P | 842.55   | 421.78   | 825.52   | 413.26   | 824.54   | 412.77   | 6  |
| 15 | 1,848.97 | 924.99   | 1,831.94 | 916.47   | 1,830.96 | 915.98   | I | 745.49   | 373.25   | 728.47   | 364.74   | 727.48   | 364.25   | 5  |
| 16 | 1,964.00 | 982.50   | 1,946.97 | 973.99   | 1,945.99 | 973.50   | D | 632.41   | 316.71   | 615.38   | 308.20   | 614.40   | 307.70   | 4  |
| 17 | 2,077.08 | 1,039.04 | 2,060.05 | 1,030.53 | 2,059.07 | 1,030.04 | L | 517.38   | 259.20   | 500.36   | 250.68   |          |          | 3  |
| 18 | 2,190.16 | 1,095.59 | 2,173.14 | 1,087.07 | 2,172.15 | 1,086.58 | I | 404.30   | 202.65   | 387.27   | 194.14   |          |          | 2  |
| 19 |          |          |          |          |          |          | K | 291.21   | 146.11   | 274.19   | 137.60   |          |          | 1  |

Query 27463 Hit 1

MS/MS Fragmentation of **YIFHNFMER**

Found in **sp|Q14624|ITIH4\_HUMAN**, Inter-alpha-trypsin inhibitor heavy chain H4 OS=Homo sapiens GN=ITIH4 PE=1 SV=4

Match to Query 27463: 1399.688from(467.5699,3+)

Title: 635: Scan 1422 (rt=41.6552, f=2, i=231) [D:\lab212\membrane\Grace\Joyce\iTRAQ\_41\_1.raw]

Data File: Submitted from 20120508-1(merge) by Mascot Daemon on JOYCE-VAIO

Monoisotopic mass of neutral peptide Mr(calc): 1399.688

Variable modifications:

Ions Score: 45.51 Expect: 0.018



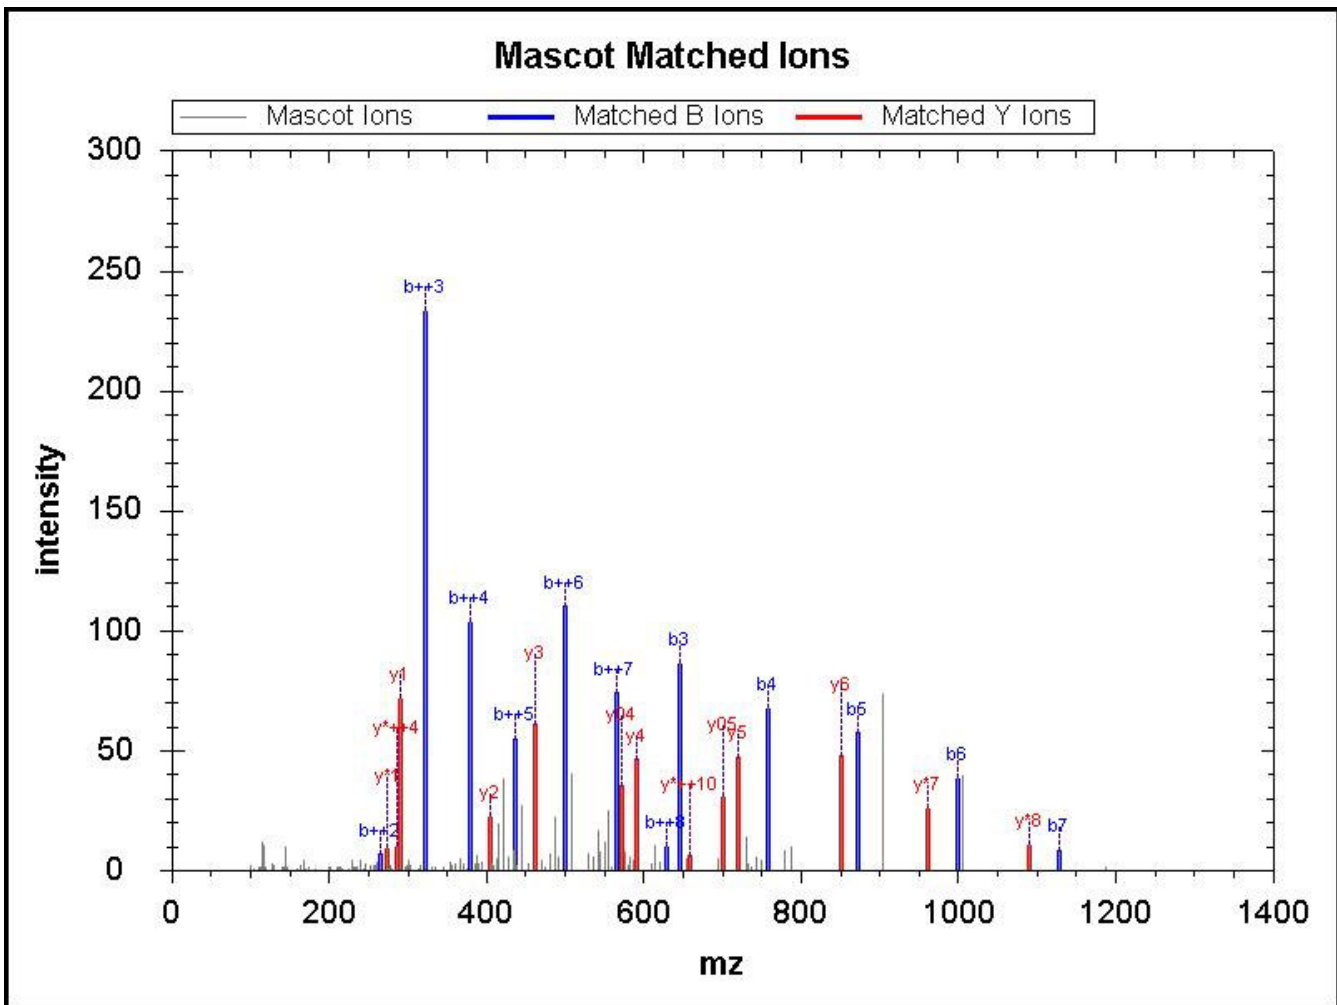

| No | b        | b++    | b*       | b*++   | b0       | b0++   | Seq | y        | y++    | y*       | y*++   | y0       | y0++   | RevNo |
|----|----------|--------|----------|--------|----------|--------|-----|----------|--------|----------|--------|----------|--------|-------|
| 1  | 258.19   | 129.60 |          |        |          |        | I   |          |        |          |        |          |        | 13    |
| 2  | 530.39   | 265.70 | 513.36   | 257.19 |          |        | K   | 1,719.96 | 860.48 | 1,702.93 | 851.97 | 1,701.94 | 851.48 | 12    |
| 3  | 645.42   | 323.21 | 628.39   | 314.70 | 627.41   | 314.21 | D   | 1,447.76 | 724.38 | 1,430.73 | 715.87 | 1,429.75 | 715.38 | 11    |
| 4  | 758.50   | 379.75 | 741.47   | 371.24 | 740.49   | 370.75 | L   | 1,332.73 | 666.87 | 1,315.70 | 658.36 | 1,314.72 | 657.86 | 10    |
| 5  | 871.59   | 436.30 | 854.56   | 427.78 | 853.57   | 427.29 | L   | 1,219.65 | 610.33 | 1,202.62 | 601.81 | 1,201.64 | 601.32 | 9     |
| 6  | 999.64   | 500.33 | 982.62   | 491.81 | 981.63   | 491.32 | Q   | 1,106.56 | 553.79 | 1,089.54 | 545.27 | 1,088.55 | 544.78 | 8     |
| 7  | 1,127.70 | 564.35 | 1,110.68 | 555.84 | 1,109.69 | 555.35 | Q   | 978.50   | 489.76 | 961.48   | 481.24 | 960.49   | 480.75 | 7     |
| 8  | 1,258.74 | 629.88 | 1,241.72 | 621.36 | 1,240.73 | 620.87 | M   | 850.45   | 425.73 | 833.42   | 417.21 | 832.44   | 416.72 | 6     |
| 9  | 1,387.79 | 694.40 | 1,370.76 | 685.88 | 1,369.78 | 685.39 | E   | 719.41   | 360.21 | 702.38   | 351.69 | 701.39   | 351.20 | 5     |
| 10 | 1,516.83 | 758.92 | 1,499.80 | 750.40 | 1,498.82 | 749.91 | E   | 590.36   | 295.69 | 573.34   | 287.17 | 572.35   | 286.68 | 4     |
| 11 | 1,573.85 | 787.43 | 1,556.82 | 778.92 | 1,555.84 | 778.42 | G   | 461.32   | 231.16 | 444.29   | 222.65 |          |        | 3     |
| 12 | 1,686.93 | 843.97 | 1,669.91 | 835.46 | 1,668.92 | 834.97 | L   | 404.30   | 202.65 | 387.27   | 194.14 |          |        | 2     |
| 13 |          |        |          |        |          |        | K   | 291.21   | 146.11 | 274.19   | 137.60 |          |        | 1     |

Query 36916 Hit 1

MS/MS Fragmentation of **AFVRPSGTEDVVR**

Found in [sp|O95394|AGM1\\_HUMAN](#), Phosphoacetylglucosamine mutase OS=Homo sapiens GN=PGM3 PE=1 SV=1

Match to Query 36916: 1575.844from(526.2888,3+)

Title: 283: Scan 719 (rt=25.5261, f=3, i=99) [D:\lab212\membrane\Grace\Joyce\iTRAQ\_38\_2.raw]

Data File: Submitted from 20120508-1(merge) by Mascot Daemon on JOYCE-VAIO

Monoisotopic mass of neutral peptide Mr(calc): 1575.844

Variable modifications:

Ions Score: 45.47 Expect: 0.025



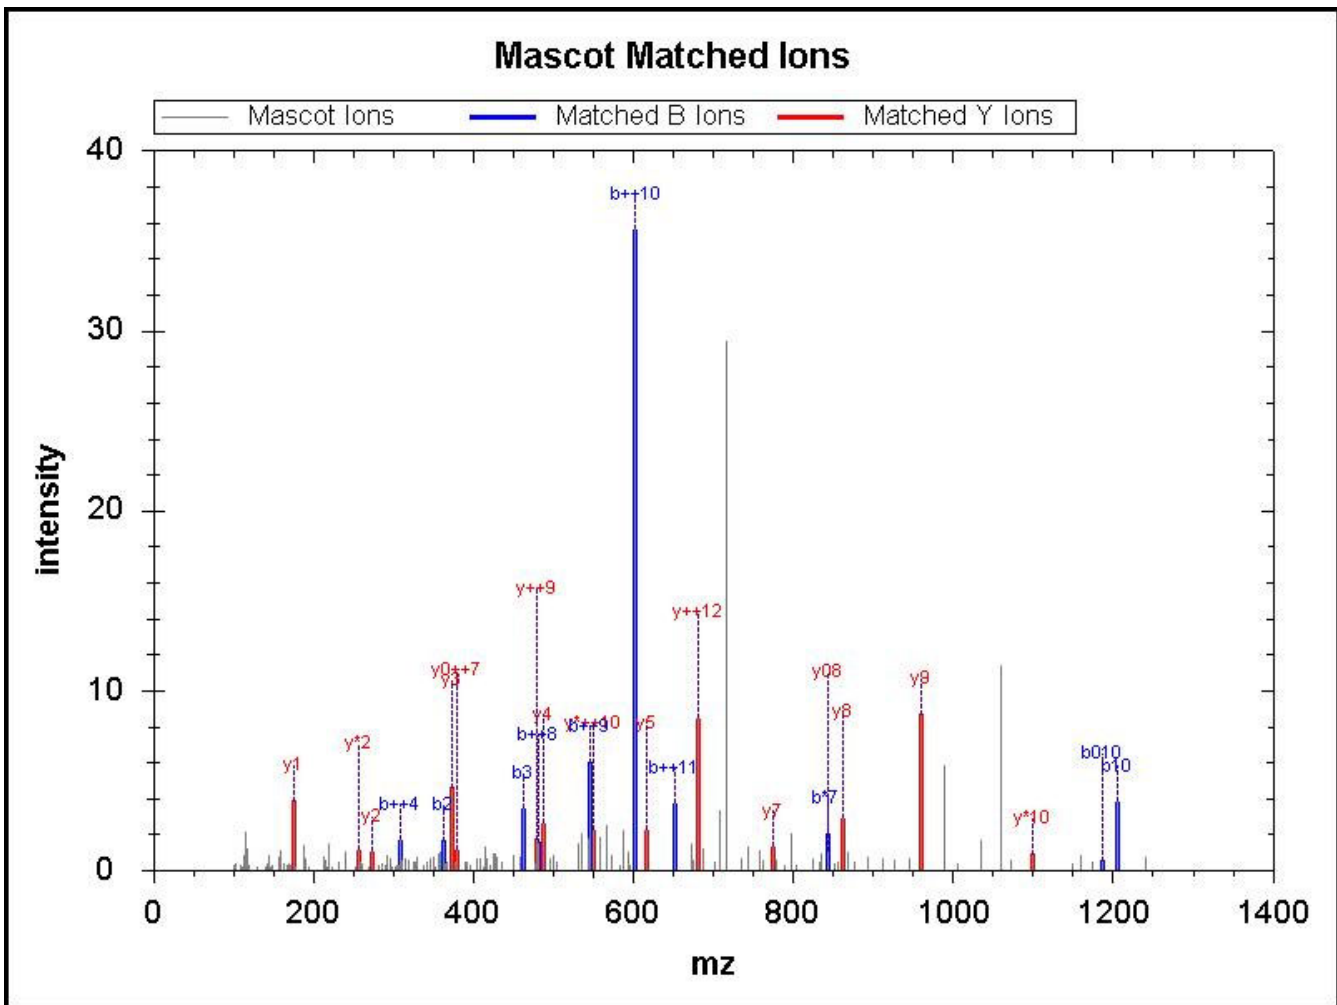

| No | b        | b++    | b*       | b*++   | b0       | b0++   | Seq | y        | y++    | y*       | y*++   | y0       | y0++   | RevNo |
|----|----------|--------|----------|--------|----------|--------|-----|----------|--------|----------|--------|----------|--------|-------|
| 1  | 216.15   | 108.58 |          |        |          |        | A   |          |        |          |        |          |        | 13    |
| 2  | 363.21   | 182.11 |          |        |          |        | F   | 1,361.72 | 681.36 | 1,344.69 | 672.85 | 1,343.71 | 672.36 | 12    |
| 3  | 462.28   | 231.65 |          |        |          |        | V   | 1,214.65 | 607.83 | 1,197.62 | 599.31 | 1,196.64 | 598.82 | 11    |
| 4  | 618.38   | 309.70 | 601.36   | 301.18 |          |        | R   | 1,115.58 | 558.29 | 1,098.55 | 549.78 | 1,097.57 | 549.29 | 10    |
| 5  | 715.44   | 358.22 | 698.41   | 349.71 |          |        | P   | 959.48   | 480.24 | 942.45   | 471.73 | 941.47   | 471.24 | 9     |
| 6  | 802.47   | 401.74 | 785.44   | 393.22 | 784.46   | 392.73 | S   | 862.43   | 431.72 | 845.40   | 423.20 | 844.42   | 422.71 | 8     |
| 7  | 859.49   | 430.25 | 842.46   | 421.74 | 841.48   | 421.24 | G   | 775.39   | 388.20 | 758.37   | 379.69 | 757.38   | 379.20 | 7     |
| 8  | 960.54   | 480.77 | 943.51   | 472.26 | 942.53   | 471.77 | T   | 718.37   | 359.69 | 701.35   | 351.18 | 700.36   | 350.68 | 6     |
| 9  | 1,089.58 | 545.29 | 1,072.55 | 536.78 | 1,071.57 | 536.29 | E   | 617.33   | 309.17 | 600.30   | 300.65 | 599.31   | 300.16 | 5     |
| 10 | 1,204.61 | 602.81 | 1,187.58 | 594.29 | 1,186.60 | 593.80 | D   | 488.28   | 244.65 | 471.26   | 236.13 | 470.27   | 235.64 | 4     |
| 11 | 1,303.68 | 652.34 | 1,286.65 | 643.83 | 1,285.67 | 643.34 | V   | 373.26   | 187.13 | 356.23   | 178.62 |          |        | 3     |
| 12 | 1,402.74 | 701.88 | 1,385.72 | 693.36 | 1,384.73 | 692.87 | V   | 274.19   | 137.60 | 257.16   | 129.08 |          |        | 2     |
| 13 |          |        |          |        |          |        | R   | 175.12   | 88.06  | 158.09   | 79.55  |          |        | 1     |

Query 46054 Hit 1

MS/MS Fragmentation of **EAFEEAGVLLLRPR**

Found in **sp|A8MXV4|NUD19\_HUMAN**, Nucleoside diphosphate-linked moiety X motif 19

Match to Query 46054: 1742.979 from (582.0001, 3+)

Title: 741: Sum of 2 scans in range 1674 (rt=47.0946, f=4, i=497) to 1675 (rt=47.12, f=4, i=498)

[D:\lab212\membrane\GraceJoyce\iTRAQ\_35\_1.raw]

Data File: Submitted from 20120508-1 (merge) by Mascot Daemon on JOYCE-VAIO

Monoisotopic mass of neutral peptide Mr(calc): 1742.979

Variable modifications:

Ions Score: 45.41 Expect: 0.020

### Mascot Matched Ions

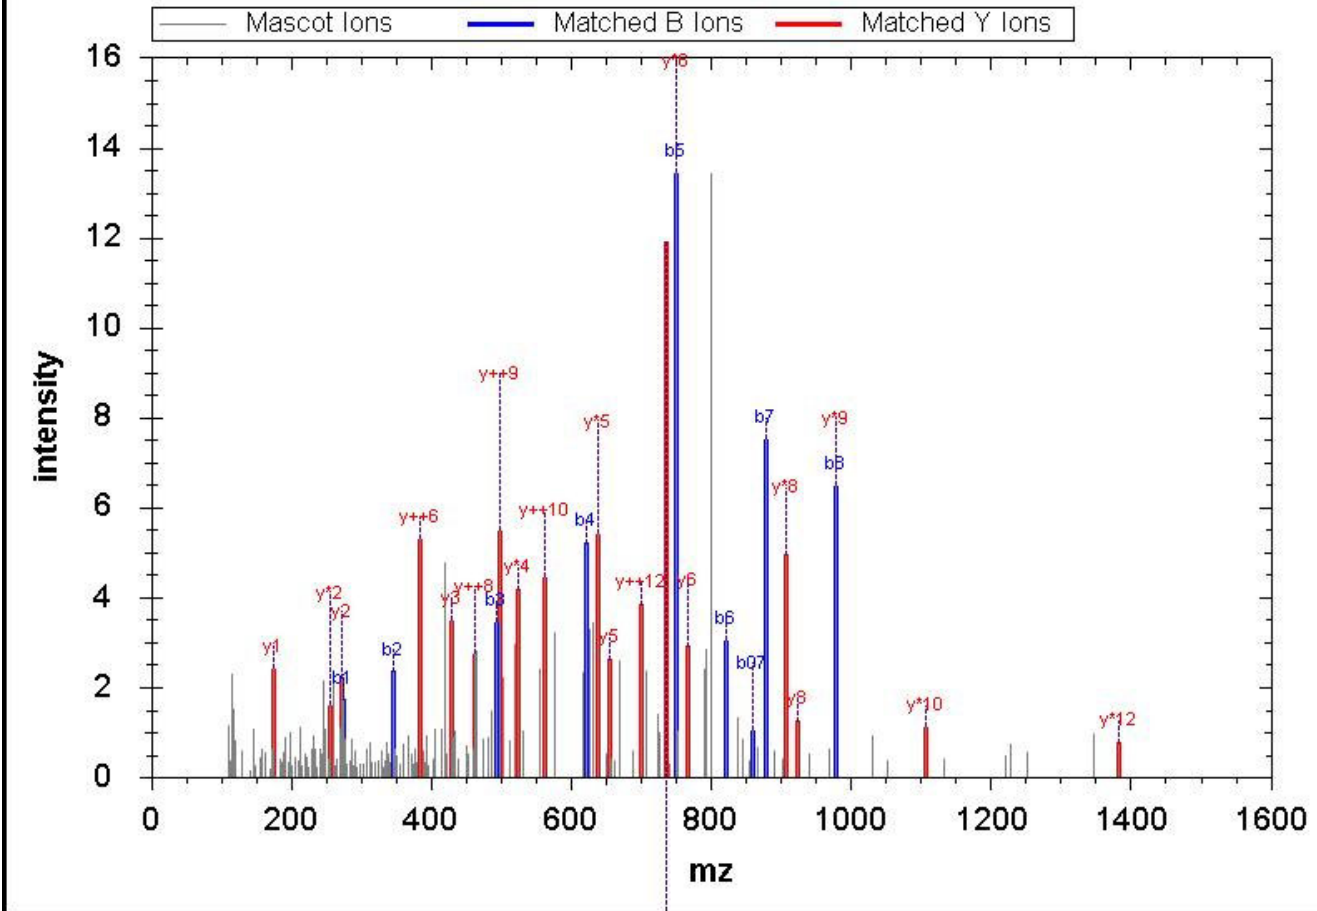

| No | b        | b++    | b*       | b*++   | b0       | b0++   | Seq | y        | y++    | y*       | y*++   | y0       | y0++   | RevNo |
|----|----------|--------|----------|--------|----------|--------|-----|----------|--------|----------|--------|----------|--------|-------|
| 1  | 274.15   | 137.58 |          |        | 256.14   | 128.57 | E   |          |        |          |        |          |        | 14    |
| 2  | 345.19   | 173.10 |          |        | 327.18   | 164.09 | A   | 1,470.84 | 735.93 | 1,453.82 | 727.41 | 1,452.83 | 726.92 | 13    |
| 3  | 492.26   | 246.63 |          |        | 474.25   | 237.63 | F   | 1,399.81 | 700.41 | 1,382.78 | 691.89 | 1,381.80 | 691.40 | 12    |
| 4  | 621.30   | 311.15 |          |        | 603.29   | 302.15 | E   | 1,252.74 | 626.87 | 1,235.71 | 618.36 | 1,234.73 | 617.87 | 11    |
| 5  | 750.34   | 375.67 |          |        | 732.33   | 366.67 | E   | 1,123.69 | 562.35 | 1,106.67 | 553.84 | 1,105.68 | 553.35 | 10    |
| 6  | 821.38   | 411.19 |          |        | 803.37   | 402.19 | A   | 994.65   | 497.83 | 977.63   | 489.32 |          |        | 9     |
| 7  | 878.40   | 439.70 |          |        | 860.39   | 430.70 | G   | 923.61   | 462.31 | 906.59   | 453.80 |          |        | 8     |
| 8  | 977.47   | 489.24 |          |        | 959.46   | 480.23 | V   | 866.59   | 433.80 | 849.57   | 425.29 |          |        | 7     |
| 9  | 1,090.55 | 545.78 |          |        | 1,072.54 | 536.78 | L   | 767.52   | 384.27 | 750.50   | 375.75 |          |        | 6     |
| 10 | 1,203.64 | 602.32 |          |        | 1,185.63 | 593.32 | L   | 654.44   | 327.72 | 637.41   | 319.21 |          |        | 5     |
| 11 | 1,316.72 | 658.86 |          |        | 1,298.71 | 649.86 | L   | 541.36   | 271.18 | 524.33   | 262.67 |          |        | 4     |
| 12 | 1,472.82 | 736.92 | 1,455.80 | 728.40 | 1,454.81 | 727.91 | R   | 428.27   | 214.64 | 411.25   | 206.13 |          |        | 3     |
| 13 | 1,569.88 | 785.44 | 1,552.85 | 776.93 | 1,551.87 | 776.44 | P   | 272.17   | 136.59 | 255.15   | 128.08 |          |        | 2     |
| 14 |          |        |          |        |          |        | R   | 175.12   | 88.06  | 158.09   | 79.55  |          |        | 1     |

Query 84451 Hit 1

MS/MS Fragmentation of **EVAQQAVDADVHAVGVSTLAAGHK**

Found in **sp|P16332|MUTA\_MOUSE**, Methylmalonyl-CoA mutase

Match to Query 84451: 2660.409from(666.1095,4+)

Title: 524: Scan 1211 (rt=36.8681, f=3, i=184) [D:\lab212\membrane\Grace\Joyce\iTRAQ\_44\_1.raw]

Data File: Submitted from 20120508-1(merge) by Mascot Daemon on JOYCE-VAIO

Monoisotopic mass of neutral peptide Mr(calc): 2660.409

Variable modifications:

K24 iTRAQ4plex (K)

Ions Score: 136.01 Expect: 0.000

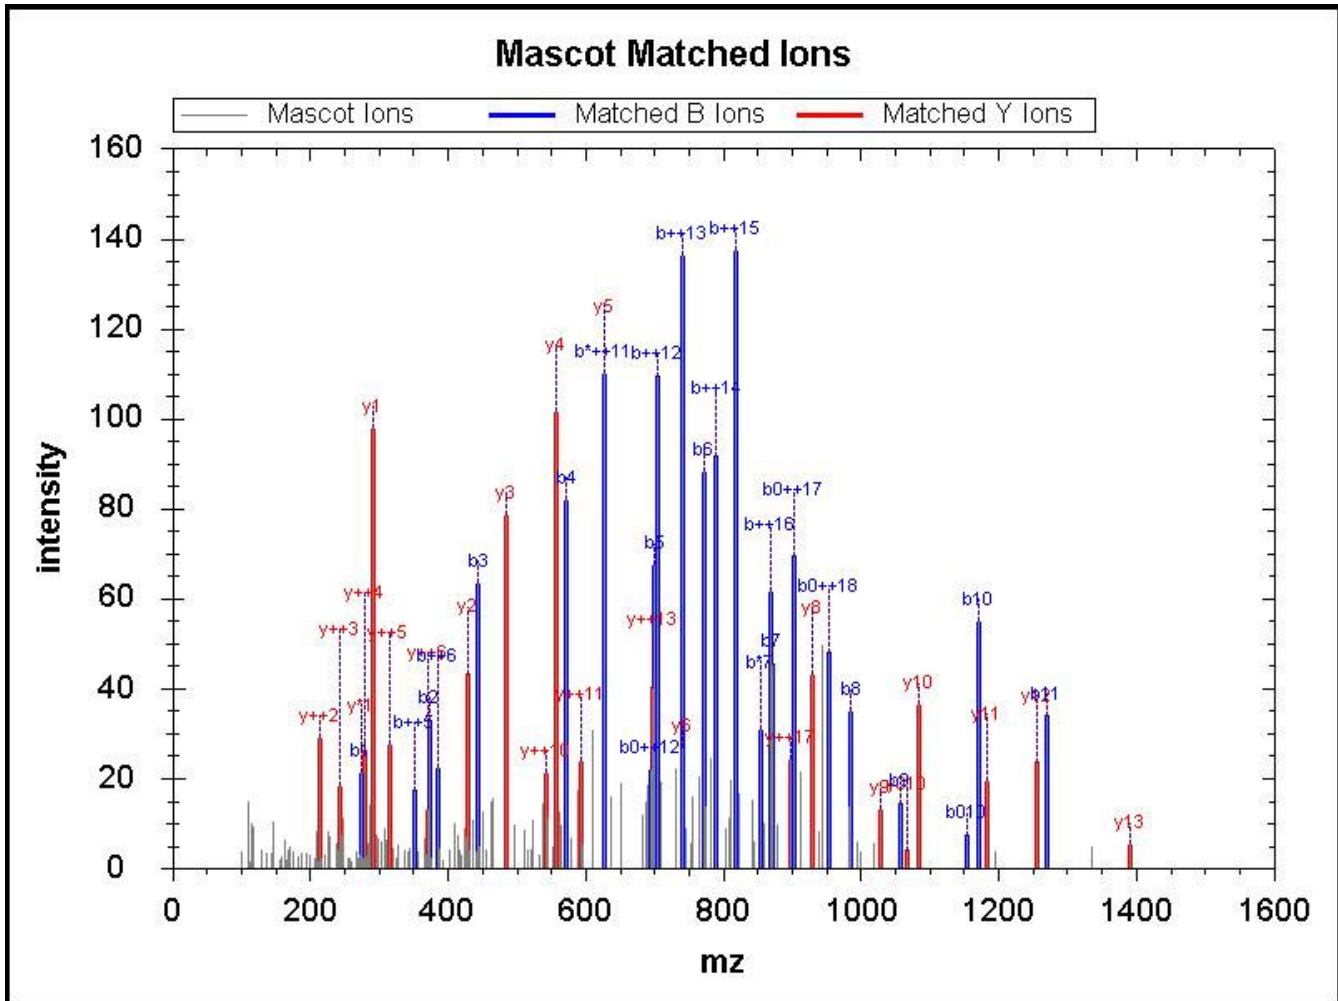

| No | b        | b++    | b*       | b*+    | b0       | b0++   | Seq | y        | y++      | y*       | y*+      | y0       | y0++     | RevNo |
|----|----------|--------|----------|--------|----------|--------|-----|----------|----------|----------|----------|----------|----------|-------|
| 1  | 274.15   | 137.58 |          |        | 256.14   | 128.57 | E   |          |          |          |          |          |          | 24    |
| 2  | 373.22   | 187.11 |          |        | 355.21   | 178.11 | V   | 2,388.27 | 1,194.64 | 2,371.25 | 1,186.13 | 2,370.26 | 1,185.64 | 23    |
| 3  | 444.26   | 222.63 |          |        | 426.25   | 213.63 | A   | 2,289.21 | 1,145.11 | 2,272.18 | 1,136.59 | 2,271.20 | 1,136.10 | 22    |
| 4  | 572.32   | 286.66 | 555.29   | 278.15 | 554.31   | 277.66 | Q   | 2,218.17 | 1,109.59 | 2,201.14 | 1,101.08 | 2,200.16 | 1,100.58 | 21    |
| 5  | 700.37   | 350.69 | 683.35   | 342.18 | 682.36   | 341.69 | Q   | 2,090.11 | 1,045.56 | 2,073.08 | 1,037.05 | 2,072.10 | 1,036.55 | 20    |
| 6  | 771.41   | 386.21 | 754.39   | 377.70 | 753.40   | 377.20 | A   | 1,962.05 | 981.53   | 1,945.03 | 973.02   | 1,944.04 | 972.52   | 19    |
| 7  | 870.48   | 435.74 | 853.45   | 427.23 | 852.47   | 426.74 | V   | 1,891.02 | 946.01   | 1,873.99 | 937.50   | 1,873.00 | 937.01   | 18    |
| 8  | 985.51   | 493.26 | 968.48   | 484.74 | 967.50   | 484.25 | D   | 1,791.95 | 896.48   | 1,774.92 | 887.96   | 1,773.94 | 887.47   | 17    |
| 9  | 1,056.54 | 528.78 | 1,039.52 | 520.26 | 1,038.53 | 519.77 | A   | 1,676.92 | 838.96   | 1,659.89 | 830.45   | 1,658.91 | 829.96   | 16    |
| 10 | 1,171.57 | 586.29 | 1,154.54 | 577.78 | 1,153.56 | 577.28 | D   | 1,605.88 | 803.45   | 1,588.86 | 794.93   | 1,587.87 | 794.44   | 15    |
| 11 | 1,270.64 | 635.82 | 1,253.61 | 627.31 | 1,252.63 | 626.82 | V   | 1,490.86 | 745.93   | 1,473.83 | 737.42   | 1,472.85 | 736.93   | 14    |
| 12 | 1,407.70 | 704.35 | 1,390.67 | 695.84 | 1,389.69 | 695.35 | H   | 1,391.79 | 696.40   | 1,374.76 | 687.88   | 1,373.78 | 687.39   | 13    |
| 13 | 1,478.74 | 739.87 | 1,461.71 | 731.36 | 1,460.73 | 730.87 | A   | 1,254.73 | 627.87   | 1,237.70 | 619.35   | 1,236.72 | 618.86   | 12    |
| 14 | 1,577.80 | 789.41 | 1,560.78 | 780.89 | 1,559.79 | 780.40 | V   | 1,183.69 | 592.35   | 1,166.66 | 583.84   | 1,165.68 | 583.34   | 11    |
| 15 | 1,634.83 | 817.92 | 1,617.80 | 809.40 | 1,616.81 | 808.91 | G   | 1,084.62 | 542.82   | 1,067.60 | 534.30   | 1,066.61 | 533.81   | 10    |

|    |          |          |          |          |          |          |   |          |        |          |        |          |        |   |
|----|----------|----------|----------|----------|----------|----------|---|----------|--------|----------|--------|----------|--------|---|
| 16 | 1,733.89 | 867.45   | 1,716.87 | 858.94   | 1,715.88 | 858.45   | V | 1,027.60 | 514.30 | 1,010.58 | 505.79 | 1,009.59 | 505.30 | 9 |
| 17 | 1,820.93 | 910.97   | 1,803.90 | 902.45   | 1,802.92 | 901.96   | S | 928.53   | 464.77 | 911.51   | 456.26 | 910.52   | 455.76 | 8 |
| 18 | 1,921.97 | 961.49   | 1,904.95 | 952.98   | 1,903.96 | 952.49   | T | 841.50   | 421.25 | 824.47   | 412.74 | 823.49   | 412.25 | 7 |
| 19 | 2,035.06 | 1,018.03 | 2,018.03 | 1,009.52 | 2,017.05 | 1,009.03 | L | 740.45   | 370.73 | 723.43   | 362.22 |          |        | 6 |
| 20 | 2,106.09 | 1,053.55 | 2,089.07 | 1,045.04 | 2,088.08 | 1,044.55 | A | 627.37   | 314.19 | 610.34   | 305.68 |          |        | 5 |
| 21 | 2,177.13 | 1,089.07 | 2,160.11 | 1,080.56 | 2,159.12 | 1,080.06 | A | 556.33   | 278.67 | 539.31   | 270.16 |          |        | 4 |
| 22 | 2,234.15 | 1,117.58 | 2,217.13 | 1,109.07 | 2,216.14 | 1,108.58 | G | 485.30   | 243.15 | 468.27   | 234.64 |          |        | 3 |
| 23 | 2,371.21 | 1,186.11 | 2,354.19 | 1,177.60 | 2,353.20 | 1,177.10 | H | 428.27   | 214.64 | 411.25   | 206.13 |          |        | 2 |
| 24 |          |          |          |          |          |          | K | 291.21   | 146.11 | 274.19   | 137.60 |          |        | 1 |

Query 38682 Hit 1

MS/MS Fragmentation of **DESTNVDMSLAQR**

Found in **sp|P50995|ANX11\_HUMAN**, Annexin A11 OS=Homo sapiens GN=ANXA11 PE=1 SV=1

Match to Query 38682: 1608.755from(805.3846,2+)

Title: 163: Scan 930 (rt=28.0072, f=3, i=57) [D:\lab212\membrane\Grace\Joyce\iTRAQ\_22\_2.raw]

Data File: Submitted from 20120508-1(merge) by Mascot Daemon on JOYCE-VAIO

Monoisotopic mass of neutral peptide Mr(calc): 1608.755

Variable modifications:

Ions Score: 106.56 Expect: 0.000

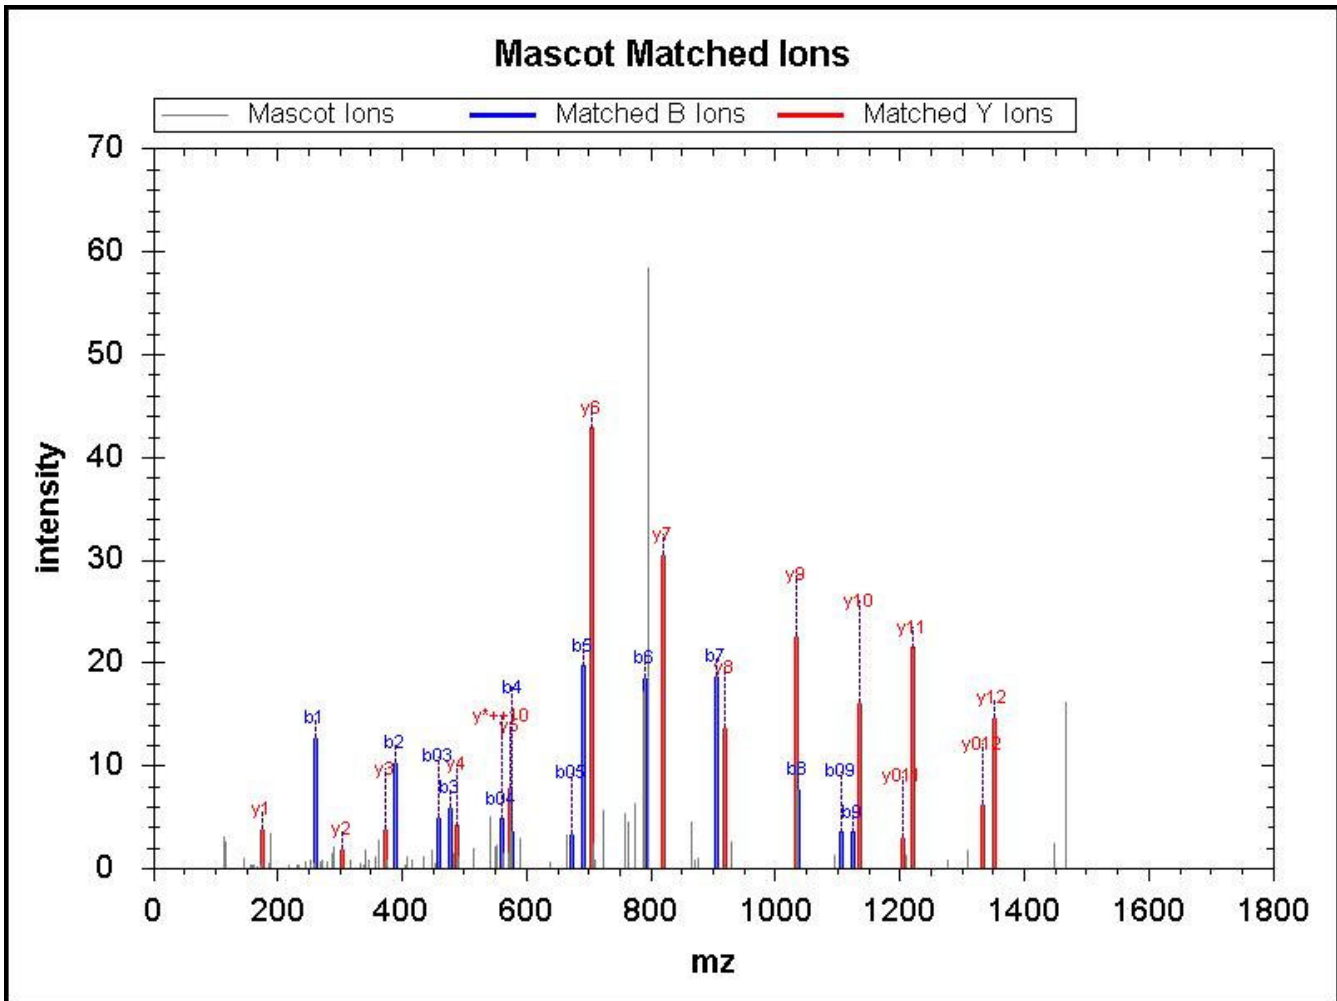

| No | b      | b++    | b*     | b*++   | b0     | b0++   | Seq | y        | y++    | y*       | y*++   | y0       | y0++   | RevNo |
|----|--------|--------|--------|--------|--------|--------|-----|----------|--------|----------|--------|----------|--------|-------|
| 1  | 260.14 | 130.57 |        |        | 242.13 | 121.57 | D   |          |        |          |        |          |        | 13    |
| 2  | 389.18 | 195.09 |        |        | 371.17 | 186.09 | E   | 1,350.63 | 675.82 | 1,333.61 | 667.31 | 1,332.62 | 666.81 | 12    |
| 3  | 476.21 | 238.61 |        |        | 458.20 | 229.60 | S   | 1,221.59 | 611.30 | 1,204.56 | 602.78 | 1,203.58 | 602.29 | 11    |
| 4  | 577.26 | 289.13 |        |        | 559.25 | 280.13 | T   | 1,134.56 | 567.78 | 1,117.53 | 559.27 | 1,116.55 | 558.78 | 10    |
| 5  | 691.30 | 346.15 | 674.27 | 337.64 | 673.29 | 337.15 | N   | 1,033.51 | 517.26 | 1,016.48 | 508.75 | 1,015.50 | 508.25 | 9     |
| 6  | 790.37 | 395.69 | 773.34 | 387.18 | 772.36 | 386.68 | V   | 919.47   | 460.24 | 902.44   | 451.72 | 901.46   | 451.23 | 8     |

|    |          |        |          |        |          |        |   |        |        |        |        |        |        |   |
|----|----------|--------|----------|--------|----------|--------|---|--------|--------|--------|--------|--------|--------|---|
| 7  | 905.40   | 453.20 | 888.37   | 444.69 | 887.39   | 444.20 | D | 820.40 | 410.70 | 803.37 | 402.19 | 802.39 | 401.70 | 7 |
| 8  | 1,036.44 | 518.72 | 1,019.41 | 510.21 | 1,018.43 | 509.72 | M | 705.37 | 353.19 | 688.34 | 344.68 | 687.36 | 344.18 | 6 |
| 9  | 1,123.47 | 562.24 | 1,106.44 | 553.73 | 1,105.46 | 553.23 | S | 574.33 | 287.67 | 557.30 | 279.16 | 556.32 | 278.66 | 5 |
| 10 | 1,236.55 | 618.78 | 1,219.53 | 610.27 | 1,218.54 | 609.78 | L | 487.30 | 244.15 | 470.27 | 235.64 |        |        | 4 |
| 11 | 1,307.59 | 654.30 | 1,290.56 | 645.79 | 1,289.58 | 645.29 | A | 374.21 | 187.61 | 357.19 | 179.10 |        |        | 3 |
| 12 | 1,435.65 | 718.33 | 1,418.62 | 709.82 | 1,417.64 | 709.32 | Q | 303.18 | 152.09 | 286.15 | 143.58 |        |        | 2 |
| 13 |          |        |          |        |          |        | R | 175.12 | 88.06  | 158.09 | 79.55  |        |        | 1 |

Query 85745 Hit 1

MS/MS Fragmentation of **IHSEVVEDTEAVSAVQQLLDDER**

Found in **sp|Q96GA7|SDSL\_HUMAN**, Serine dehydratase-like OS=Homo sapiens GN=SDSL PE=1 SV=1

Match to Query 85745: 2725.35 from (909.4572,3+)

Title: 908: Scan 2000 (rt=54.5787, f=2, i=316) [D:\lab212\membrane\Grace\Joyce\iTRAQ\_34\_2.raw]

Data File: Submitted from 20120508-1(merge) by Mascot Daemon on JOYCE-VAIO

Monoisotopic mass of neutral peptide Mr(calc): 2725.35

Variable modifications:

Ions Score: 105.8 Expect: 0.000

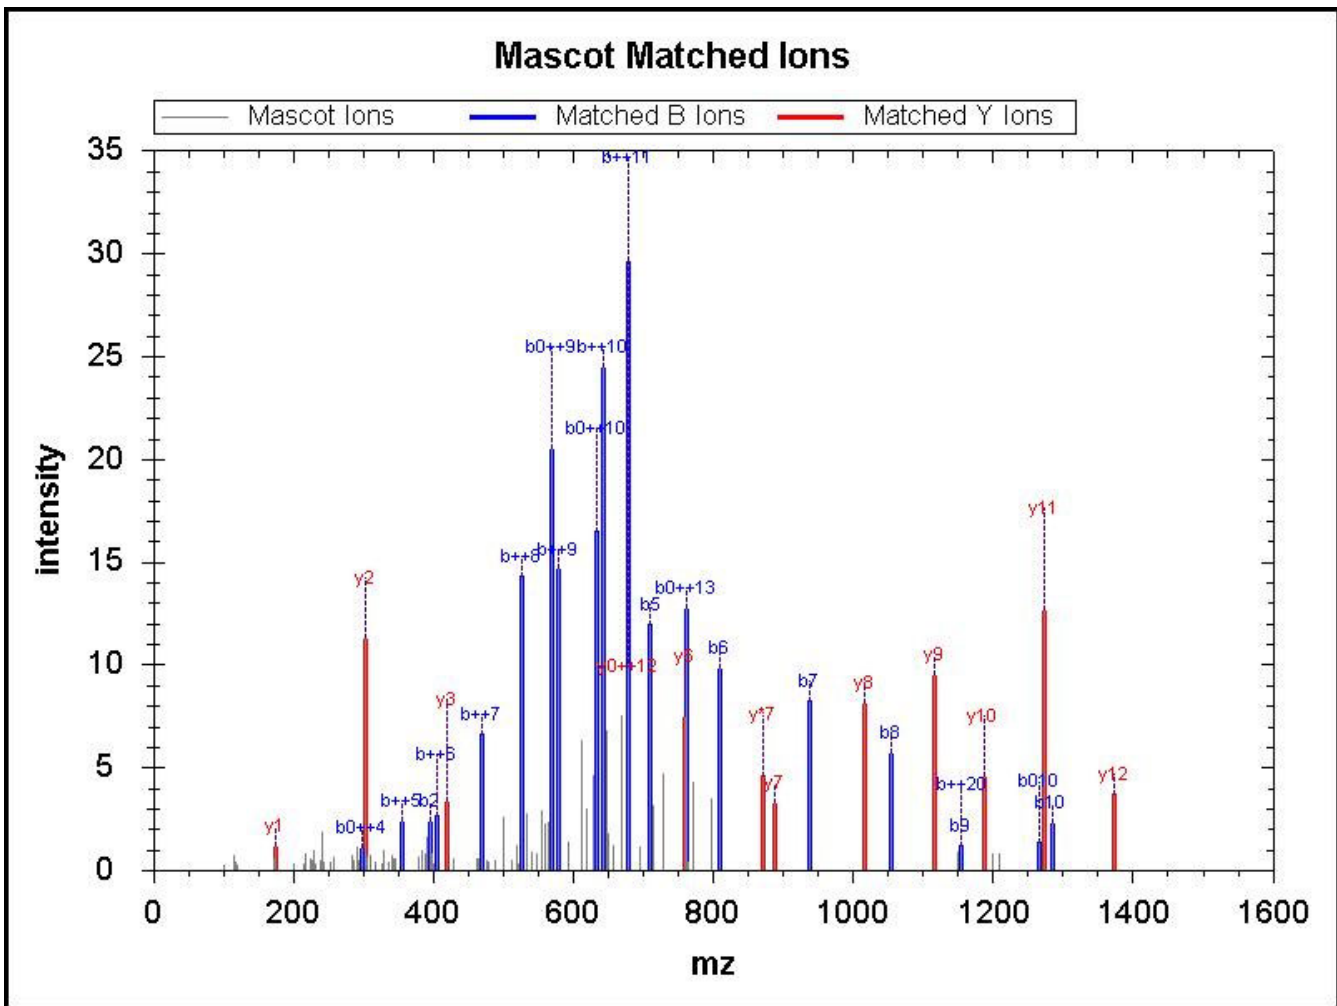

|    |          |          |          |          |          |          |   |          |        |          |        |          |        |    |
|----|----------|----------|----------|----------|----------|----------|---|----------|--------|----------|--------|----------|--------|----|
| 9  | 1,154.58 | 577.79   |          |          | 1,136.57 | 568.79   | T | 1,673.83 | 837.42 | 1,656.81 | 828.91 | 1,655.82 | 828.42 | 15 |
| 10 | 1,283.62 | 642.32   |          |          | 1,265.61 | 633.31   | E | 1,572.79 | 786.90 | 1,555.76 | 778.38 | 1,554.78 | 777.89 | 14 |
| 11 | 1,354.66 | 677.83   |          |          | 1,336.65 | 668.83   | A | 1,443.74 | 722.38 | 1,426.72 | 713.86 | 1,425.73 | 713.37 | 13 |
| 12 | 1,453.73 | 727.37   |          |          | 1,435.72 | 718.36   | V | 1,372.71 | 686.86 | 1,355.68 | 678.34 | 1,354.70 | 677.85 | 12 |
| 13 | 1,540.76 | 770.88   |          |          | 1,522.75 | 761.88   | S | 1,273.64 | 637.32 | 1,256.61 | 628.81 | 1,255.63 | 628.32 | 11 |
| 14 | 1,611.80 | 806.40   |          |          | 1,593.79 | 797.40   | A | 1,186.61 | 593.81 | 1,169.58 | 585.29 | 1,168.60 | 584.80 | 10 |
| 15 | 1,710.87 | 855.94   |          |          | 1,692.86 | 846.93   | V | 1,115.57 | 558.29 | 1,098.54 | 549.77 | 1,097.56 | 549.28 | 9  |
| 16 | 1,838.93 | 919.97   | 1,821.90 | 911.45   | 1,820.91 | 910.96   | Q | 1,016.50 | 508.75 | 999.47   | 500.24 | 998.49   | 499.75 | 8  |
| 17 | 1,966.98 | 984.00   | 1,949.96 | 975.48   | 1,948.97 | 974.99   | Q | 888.44   | 444.72 | 871.42   | 436.21 | 870.43   | 435.72 | 7  |
| 18 | 2,080.07 | 1,040.54 | 2,063.04 | 1,032.02 | 2,062.06 | 1,031.53 | L | 760.38   | 380.70 | 743.36   | 372.18 | 742.37   | 371.69 | 6  |
| 19 | 2,193.15 | 1,097.08 | 2,176.13 | 1,088.57 | 2,175.14 | 1,088.07 | L | 647.30   | 324.15 | 630.27   | 315.64 | 629.29   | 315.15 | 5  |
| 20 | 2,308.18 | 1,154.59 | 2,291.15 | 1,146.08 | 2,290.17 | 1,145.59 | D | 534.22   | 267.61 | 517.19   | 259.10 | 516.20   | 258.61 | 4  |
| 21 | 2,423.21 | 1,212.11 | 2,406.18 | 1,203.59 | 2,405.20 | 1,203.10 | D | 419.19   | 210.10 | 402.16   | 201.58 | 401.18   | 201.09 | 3  |
| 22 | 2,552.25 | 1,276.63 | 2,535.22 | 1,268.11 | 2,534.24 | 1,267.62 | E | 304.16   | 152.58 | 287.13   | 144.07 | 286.15   | 143.58 | 2  |
| 23 |          |          |          |          |          |          | R | 175.12   | 88.06  | 158.09   | 79.55  |          |        | 1  |

Query 53024 Hit 1

MS/MS Fragmentation of **SELEEQLTPVAEETR**

Found in **sp|P02649|APOE\_HUMAN**, Apolipoprotein E OS=Homo sapiens GN=APOE PE=1 SV=1

Match to Query 53024: 1873.943from(937.9787,2+)

Title: 198: Sum of 2 scans in range 1367 (rt=37.0315, f=4, i=160) to 1368 (rt=37.0569, f=4, i=161)

[D:\lab212\membrane\GraceJoyce\iTRAQ\_19\_2\_330.raw]

Data File: Submitted from 20120508-1(merge) by Mascot Daemon on JOYCE-VAIO

Monoisotopic mass of neutral peptide Mr(calc): 1873.943

Variable modifications:

Ions Score: 103.35 Expect: 0.000

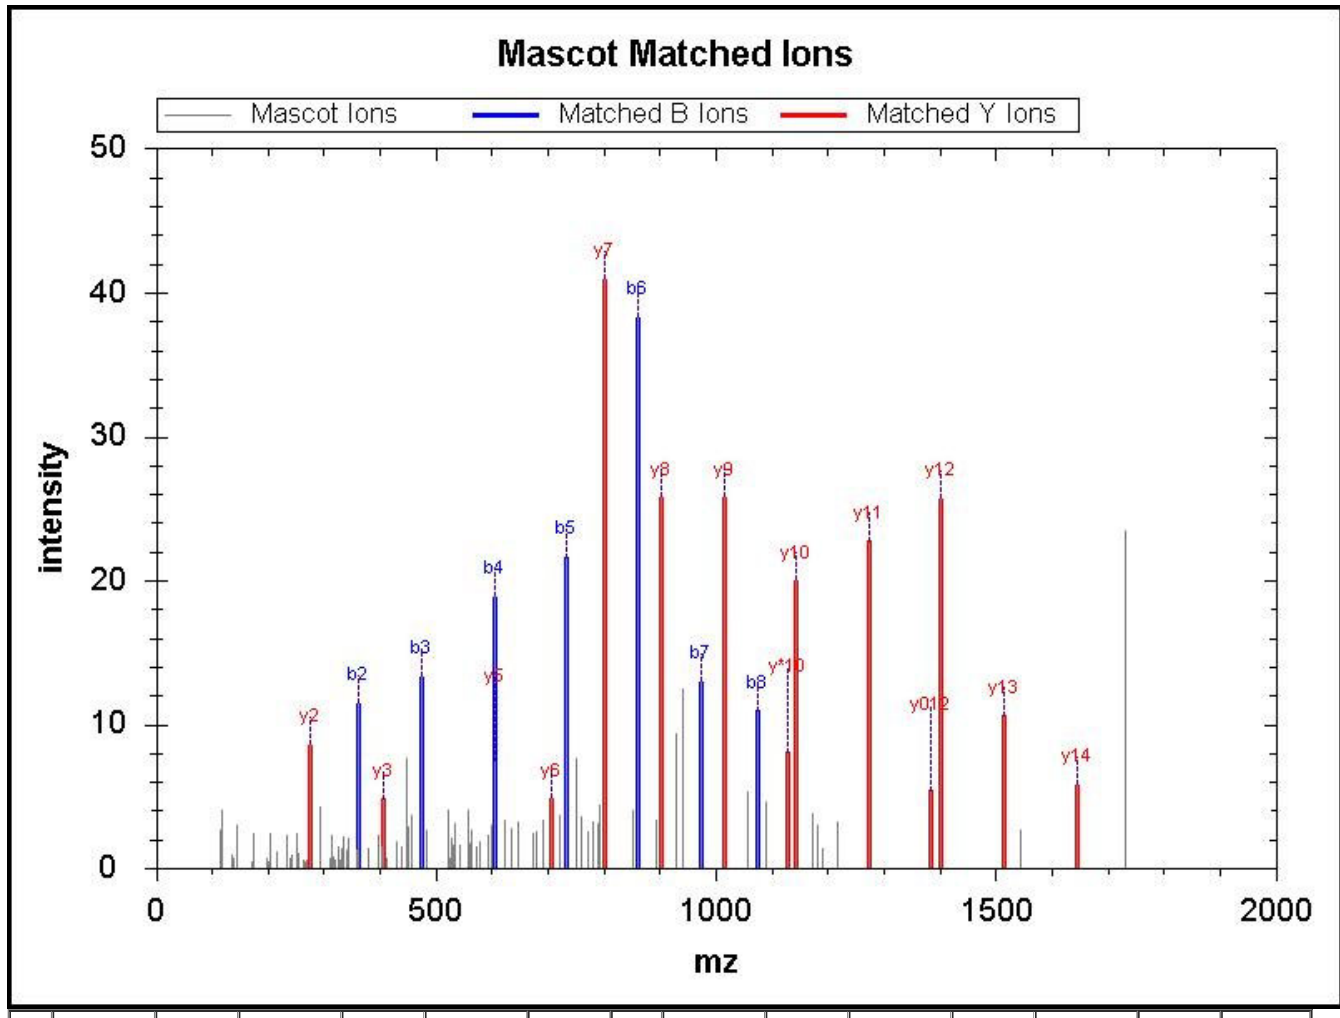

| No | b        | b++    | b*       | b*++   | b0       | b0++   | Seq | y        | y++    | y*       | y*++   | y0       | y0++   | RevNo |
|----|----------|--------|----------|--------|----------|--------|-----|----------|--------|----------|--------|----------|--------|-------|
| 1  | 232.14   | 116.57 |          |        | 214.13   | 107.57 | S   |          |        |          |        |          |        | 15    |
| 2  | 361.18   | 181.10 |          |        | 343.17   | 172.09 | E   | 1,643.81 | 822.41 | 1,626.79 | 813.90 | 1,625.80 | 813.40 | 14    |
| 3  | 474.27   | 237.64 |          |        | 456.26   | 228.63 | L   | 1,514.77 | 757.89 | 1,497.74 | 749.38 | 1,496.76 | 748.88 | 13    |
| 4  | 603.31   | 302.16 |          |        | 585.30   | 293.15 | E   | 1,401.69 | 701.35 | 1,384.66 | 692.83 | 1,383.67 | 692.34 | 12    |
| 5  | 732.35   | 366.68 |          |        | 714.34   | 357.67 | E   | 1,272.64 | 636.83 | 1,255.62 | 628.31 | 1,254.63 | 627.82 | 11    |
| 6  | 860.41   | 430.71 | 843.39   | 422.20 | 842.40   | 421.70 | Q   | 1,143.60 | 572.30 | 1,126.57 | 563.79 | 1,125.59 | 563.30 | 10    |
| 7  | 973.50   | 487.25 | 956.47   | 478.74 | 955.49   | 478.25 | L   | 1,015.54 | 508.27 | 998.52   | 499.76 | 997.53   | 499.27 | 9     |
| 8  | 1,074.54 | 537.78 | 1,057.52 | 529.26 | 1,056.53 | 528.77 | T   | 902.46   | 451.73 | 885.43   | 443.22 | 884.45   | 442.73 | 8     |
| 9  | 1,171.60 | 586.30 | 1,154.57 | 577.79 | 1,153.59 | 577.30 | P   | 801.41   | 401.21 | 784.38   | 392.70 | 783.40   | 392.20 | 7     |
| 10 | 1,270.66 | 635.84 | 1,253.64 | 627.32 | 1,252.65 | 626.83 | V   | 704.36   | 352.68 | 687.33   | 344.17 | 686.35   | 343.68 | 6     |
| 11 | 1,341.70 | 671.35 | 1,324.68 | 662.84 | 1,323.69 | 662.35 | A   | 605.29   | 303.15 | 588.26   | 294.63 | 587.28   | 294.14 | 5     |
| 12 | 1,470.74 | 735.88 | 1,453.72 | 727.36 | 1,452.73 | 726.87 | E   | 534.25   | 267.63 | 517.23   | 259.12 | 516.24   | 258.62 | 4     |
| 13 | 1,599.79 | 800.40 | 1,582.76 | 791.88 | 1,581.78 | 791.39 | E   | 405.21   | 203.11 | 388.18   | 194.59 | 387.20   | 194.10 | 3     |
| 14 | 1,700.83 | 850.92 | 1,683.81 | 842.41 | 1,682.82 | 841.92 | T   | 276.17   | 138.59 | 259.14   | 130.07 | 258.16   | 129.58 | 2     |
| 15 |          |        |          |        |          |        | R   | 175.12   | 88.06  | 158.09   | 79.55  |          |        | 1     |

Query 32852 Hit 1

MS/MS Fragmentation of **TLGDQLSLLGAR**

Found in **sp|Q9UBG0|MRC2\_HUMAN**, C-type mannose receptor 2 OS=Homo sapiens GN=MRC2 PE=1 SV=2

Match to Query 32852: 1499.875from(750.9446,2+)

Title: 972: Sum of 2 scans in range 2227 (rt=59.2248, f=4, i=633) to 2228 (rt=59.2503, f=4, i=634)

[D:\lab212\membrane\Grace\Joyce\iTRAQ\_23\_1.raw]

Data File: Submitted from 20120508-1(merge) by Mascot Daemon on JOYCE-VAIO

Monoisotopic mass of neutral peptide Mr(calc): 1499.875

Variable modifications:

Ions Score: 98.7 Expect: 0.000

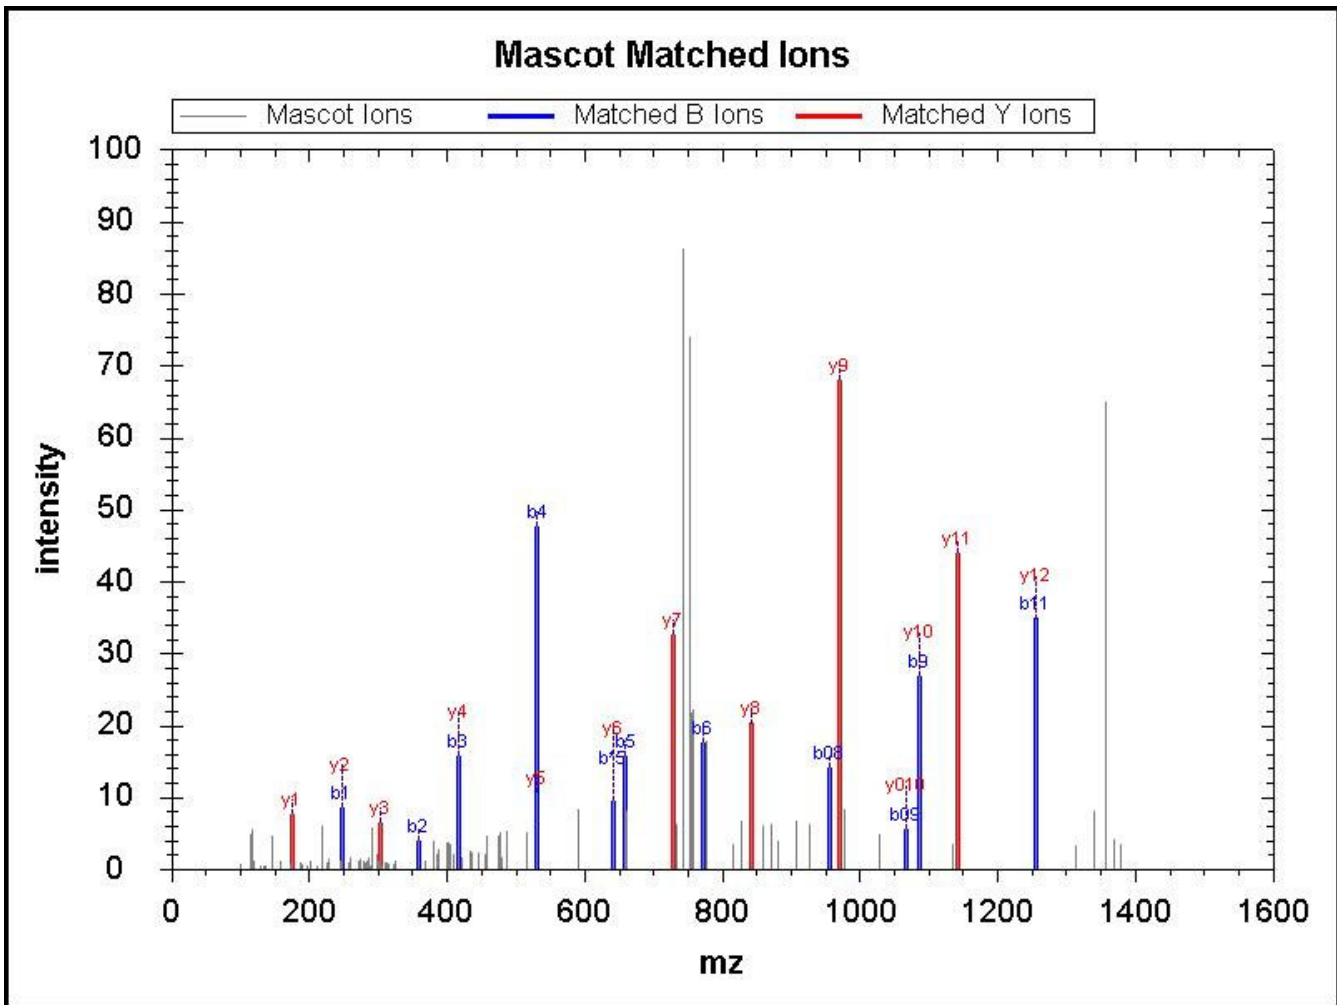

| No | b        | b++    | b*       | b*++   | b0       | b0++   | Seq | y        | y++    | y*       | y*++   | y0       | y0++   | RevNo |
|----|----------|--------|----------|--------|----------|--------|-----|----------|--------|----------|--------|----------|--------|-------|
| 1  | 246.16   | 123.58 |          |        | 228.15   | 114.58 | T   |          |        |          |        |          |        | 13    |
| 2  | 359.24   | 180.12 |          |        | 341.23   | 171.12 | L   | 1,255.74 | 628.37 | 1,238.71 | 619.86 | 1,237.73 | 619.37 | 12    |
| 3  | 416.26   | 208.63 |          |        | 398.25   | 199.63 | G   | 1,142.65 | 571.83 | 1,125.63 | 563.32 | 1,124.64 | 562.82 | 11    |
| 4  | 531.29   | 266.15 |          |        | 513.28   | 257.14 | D   | 1,085.63 | 543.32 | 1,068.60 | 534.81 | 1,067.62 | 534.31 | 10    |
| 5  | 659.35   | 330.18 | 642.32   | 321.66 | 641.34   | 321.17 | Q   | 970.60   | 485.81 | 953.58   | 477.29 | 952.59   | 476.80 | 9     |
| 6  | 772.43   | 386.72 | 755.41   | 378.21 | 754.42   | 377.71 | L   | 842.55   | 421.78 | 825.52   | 413.26 | 824.54   | 412.77 | 8     |
| 7  | 859.46   | 430.24 | 842.44   | 421.72 | 841.45   | 421.23 | S   | 729.46   | 365.23 | 712.44   | 356.72 | 711.45   | 356.23 | 7     |
| 8  | 972.55   | 486.78 | 955.52   | 478.26 | 954.54   | 477.77 | L   | 642.43   | 321.72 | 625.40   | 313.21 |          |        | 6     |
| 9  | 1,085.63 | 543.32 | 1,068.61 | 534.81 | 1,067.62 | 534.31 | L   | 529.35   | 265.18 | 512.32   | 256.66 |          |        | 5     |
| 10 | 1,198.72 | 599.86 | 1,181.69 | 591.35 | 1,180.71 | 590.86 | L   | 416.26   | 208.63 | 399.24   | 200.12 |          |        | 4     |
| 11 | 1,255.74 | 628.37 | 1,238.71 | 619.86 | 1,237.73 | 619.37 | G   | 303.18   | 152.09 | 286.15   | 143.58 |          |        | 3     |
| 12 | 1,326.78 | 663.89 | 1,309.75 | 655.38 | 1,308.76 | 654.89 | A   | 246.16   | 123.58 | 229.13   | 115.07 |          |        | 2     |
| 13 |          |        |          |        |          |        | R   | 175.12   | 88.06  | 158.09   | 79.55  |          |        | 1     |

Query 82496 Hit 1

MS/MS Fragmentation of **LVVTQEDVELAYQEAMMNMAR**

Found in **sp|P49903|SPS1\_HUMAN**, Selenide

Match to Query 82496: 2584.254from(862.4254,3+)

Title: 759: Scan 2544 (rt=63.5498, f=3, i=279) [D:\lab212\membrane\Grace\Joyce\iTRAQ\_19\_2\_330.raw]

Data File: Submitted from 20120508-1(merge) by Mascot Daemon on JOYCE-VAIO

Monoisotopic mass of neutral peptide Mr(calc): 2584.254

Variable modifications:

Ions Score: 95.44 Expect: 0.000



### Mascot Matched Ions

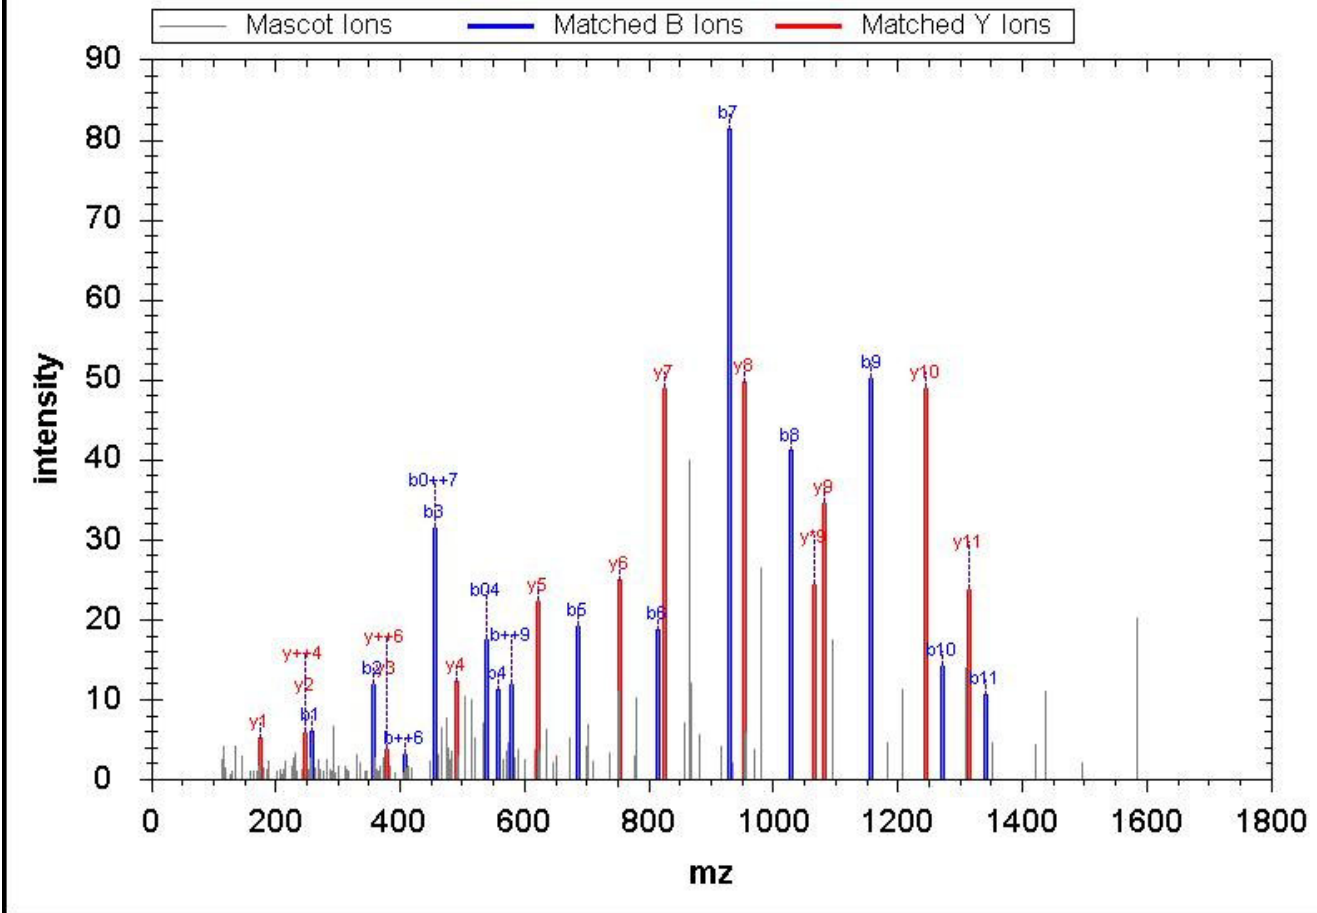

| No | b        | b++      | b*       | b***     | b0       | b0++     | Seq | y        | y++      | y*       | y***     | y0       | y0++     | RevNo |
|----|----------|----------|----------|----------|----------|----------|-----|----------|----------|----------|----------|----------|----------|-------|
| 1  | 258.19   | 129.60   |          |          |          |          | L   |          |          |          |          |          |          | 21    |
| 2  | 357.26   | 179.13   |          |          |          |          | V   | 2,328.07 | 1,164.54 | 2,311.04 | 1,156.02 | 2,310.06 | 1,155.53 | 20    |
| 3  | 456.33   | 228.67   |          |          |          |          | V   | 2,229.00 | 1,115.00 | 2,211.97 | 1,106.49 | 2,210.99 | 1,106.00 | 19    |
| 4  | 557.38   | 279.19   |          |          | 539.37   | 270.19   | T   | 2,129.93 | 1,065.47 | 2,112.90 | 1,056.96 | 2,111.92 | 1,056.46 | 18    |
| 5  | 685.44   | 343.22   | 668.41   | 334.71   | 667.43   | 334.22   | Q   | 2,028.88 | 1,014.94 | 2,011.86 | 1,006.43 | 2,010.87 | 1,005.94 | 17    |
| 6  | 814.48   | 407.74   | 797.45   | 399.23   | 796.47   | 398.74   | E   | 1,900.82 | 950.92   | 1,883.80 | 942.40   | 1,882.81 | 941.91   | 16    |
| 7  | 929.51   | 465.26   | 912.48   | 456.74   | 911.50   | 456.25   | D   | 1,771.78 | 886.39   | 1,754.75 | 877.88   | 1,753.77 | 877.39   | 15    |
| 8  | 1,028.57 | 514.79   | 1,011.55 | 506.28   | 1,010.56 | 505.79   | V   | 1,656.75 | 828.88   | 1,639.73 | 820.37   | 1,638.74 | 819.88   | 14    |
| 9  | 1,157.62 | 579.31   | 1,140.59 | 570.80   | 1,139.61 | 570.31   | E   | 1,557.69 | 779.35   | 1,540.66 | 770.83   | 1,539.68 | 770.34   | 13    |
| 10 | 1,270.70 | 635.85   | 1,253.67 | 627.34   | 1,252.69 | 626.85   | L   | 1,428.64 | 714.83   | 1,411.62 | 706.31   | 1,410.63 | 705.82   | 12    |
| 11 | 1,341.74 | 671.37   | 1,324.71 | 662.86   | 1,323.73 | 662.37   | A   | 1,315.56 | 658.28   | 1,298.53 | 649.77   | 1,297.55 | 649.28   | 11    |
| 12 | 1,504.80 | 752.90   | 1,487.78 | 744.39   | 1,486.79 | 743.90   | Y   | 1,244.52 | 622.76   | 1,227.50 | 614.25   | 1,226.51 | 613.76   | 10    |
| 13 | 1,632.86 | 816.93   | 1,615.83 | 808.42   | 1,614.85 | 807.93   | Q   | 1,081.46 | 541.23   | 1,064.43 | 532.72   | 1,063.45 | 532.23   | 9     |
| 14 | 1,761.90 | 881.46   | 1,744.88 | 872.94   | 1,743.89 | 872.45   | E   | 953.40   | 477.20   | 936.37   | 468.69   | 935.39   | 468.20   | 8     |
| 15 | 1,832.94 | 916.97   | 1,815.91 | 908.46   | 1,814.93 | 907.97   | A   | 824.36   | 412.68   | 807.33   | 404.17   |          |          | 7     |
| 16 | 1,963.98 | 982.49   | 1,946.95 | 973.98   | 1,945.97 | 973.49   | M   | 753.32   | 377.16   | 736.29   | 368.65   |          |          | 6     |
| 17 | 2,095.02 | 1,048.01 | 2,077.99 | 1,039.50 | 2,077.01 | 1,039.01 | M   | 622.28   | 311.64   | 605.25   | 303.13   |          |          | 5     |
| 18 | 2,209.06 | 1,105.04 | 2,192.04 | 1,096.52 | 2,191.05 | 1,096.03 | N   | 491.24   | 246.12   | 474.21   | 237.61   |          |          | 4     |
| 19 | 2,340.10 | 1,170.56 | 2,323.08 | 1,162.04 | 2,322.09 | 1,161.55 | M   | 377.20   | 189.10   | 360.17   | 180.59   |          |          | 3     |
| 20 | 2,411.14 | 1,206.07 | 2,394.11 | 1,197.56 | 2,393.13 | 1,197.07 | A   | 246.16   | 123.58   | 229.13   | 115.07   |          |          | 2     |
| 21 |          |          |          |          |          |          | R   | 175.12   | 88.06    | 158.09   | 79.55    |          |          | 1     |

Query 37987 Hit 1

MS/MS Fragmentation of DIFSEVGPVVSFR

Found in [sp|P33240|CSTF2\\_HUMAN](#), Cleavage stimulation factor subunit 2 OS=Homo sapiens GN=CSTF2 PE=1 SV=1  
 Match to Query 37987: 1594.846from(798.4301,2+)  
 Title: 843: Scan 2012 (rt=54.5108, f=3, i=304) [D:\lab212\membrane\Grace\Joyce\iTRAQ\_21\_2.raw]  
 Data File:Submitted from 20120508-1(merge) by Mascot Daemon on JOYCE-VAIO  
 Monoisotopic mass of neutral peptide Mr(calc): 1594.846  
 Variable modifications:  
 Ions Score: 92.95 Expect: 0.000

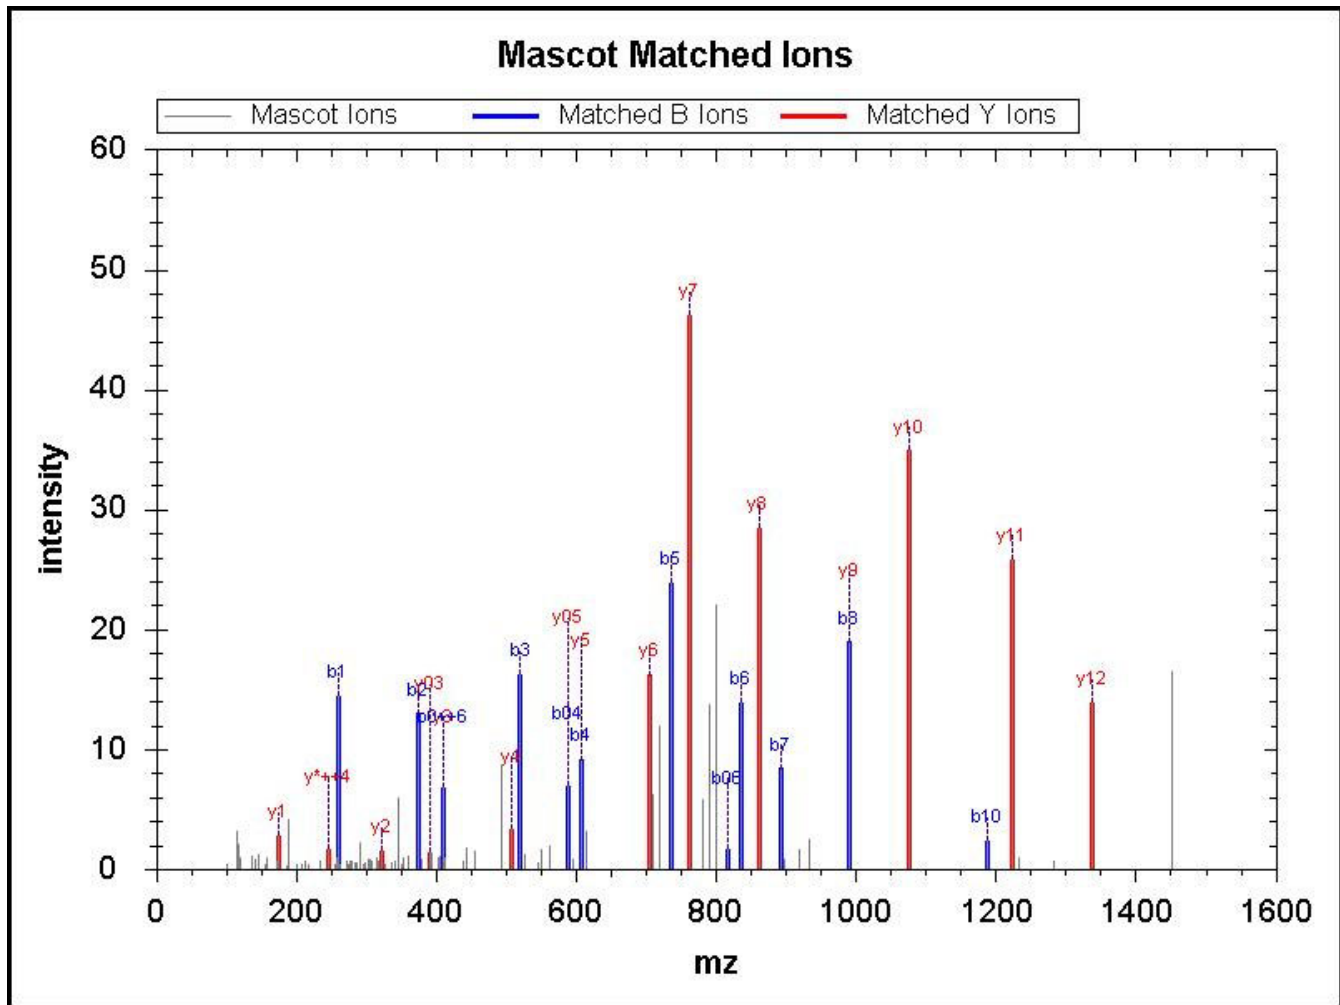

| No | b        | b++    | b0       | b0++   | Seq | y        | y++    | y*       | y*++   | y0       | y0++   | RevNo |
|----|----------|--------|----------|--------|-----|----------|--------|----------|--------|----------|--------|-------|
| 1  | 260.14   | 130.57 | 242.13   | 121.57 | D   |          |        |          |        |          |        | 13    |
| 2  | 373.22   | 187.11 | 355.21   | 178.11 | I   | 1,336.73 | 668.87 | 1,319.70 | 660.35 | 1,318.72 | 659.86 | 12    |
| 3  | 520.29   | 260.65 | 502.28   | 251.64 | F   | 1,223.64 | 612.32 | 1,206.62 | 603.81 | 1,205.63 | 603.32 | 11    |
| 4  | 607.32   | 304.16 | 589.31   | 295.16 | S   | 1,076.57 | 538.79 | 1,059.55 | 530.28 | 1,058.56 | 529.79 | 10    |
| 5  | 736.36   | 368.69 | 718.35   | 359.68 | E   | 989.54   | 495.27 | 972.51   | 486.76 | 971.53   | 486.27 | 9     |
| 6  | 835.43   | 418.22 | 817.42   | 409.21 | V   | 860.50   | 430.75 | 843.47   | 422.24 | 842.49   | 421.75 | 8     |
| 7  | 892.45   | 446.73 | 874.44   | 437.73 | G   | 761.43   | 381.22 | 744.40   | 372.71 | 743.42   | 372.21 | 7     |
| 8  | 989.51   | 495.26 | 971.50   | 486.25 | P   | 704.41   | 352.71 | 687.38   | 344.19 | 686.40   | 343.70 | 6     |
| 9  | 1,088.57 | 544.79 | 1,070.56 | 535.79 | V   | 607.36   | 304.18 | 590.33   | 295.67 | 589.35   | 295.18 | 5     |
| 10 | 1,187.64 | 594.33 | 1,169.63 | 585.32 | V   | 508.29   | 254.65 | 491.26   | 246.13 | 490.28   | 245.64 | 4     |
| 11 | 1,274.67 | 637.84 | 1,256.66 | 628.84 | S   | 409.22   | 205.11 | 392.19   | 196.60 | 391.21   | 196.11 | 3     |
| 12 | 1,421.74 | 711.38 | 1,403.73 | 702.37 | F   | 322.19   | 161.60 | 305.16   | 153.08 |          |        | 2     |
| 13 |          |        |          |        | R   | 175.12   | 88.06  | 158.09   | 79.55  |          |        | 1     |

Query 49554 Hit 1

MS/MS Fragmentation of [SAAMLGNSDHTALSR](#)

Found in [sp|O60749|SNX2\\_HUMAN](#), Sorting nexin-2 OS=Homo sapiens GN=SNX2 PE=1 SV=2  
 Match to Query 49554: 1802.871from(601.9642,3+)

Title: 262: Sum of 2 scans in range 672 (rt=24.5437, f=4, i=173) to 673 (rt=24.5691, f=4, i=174)

[D:\lab212\membrane\GraceJoyce\iTRAQ\_36\_1.raw]

Data File: Submitted from 20120508-1(merge) by Mascot Daemon on JOYCE-VAIO

Monoisotopic mass of neutral peptide Mr(calc): 1802.871

Variable modifications:

Ions Score: 92.22 Expect: 0.000

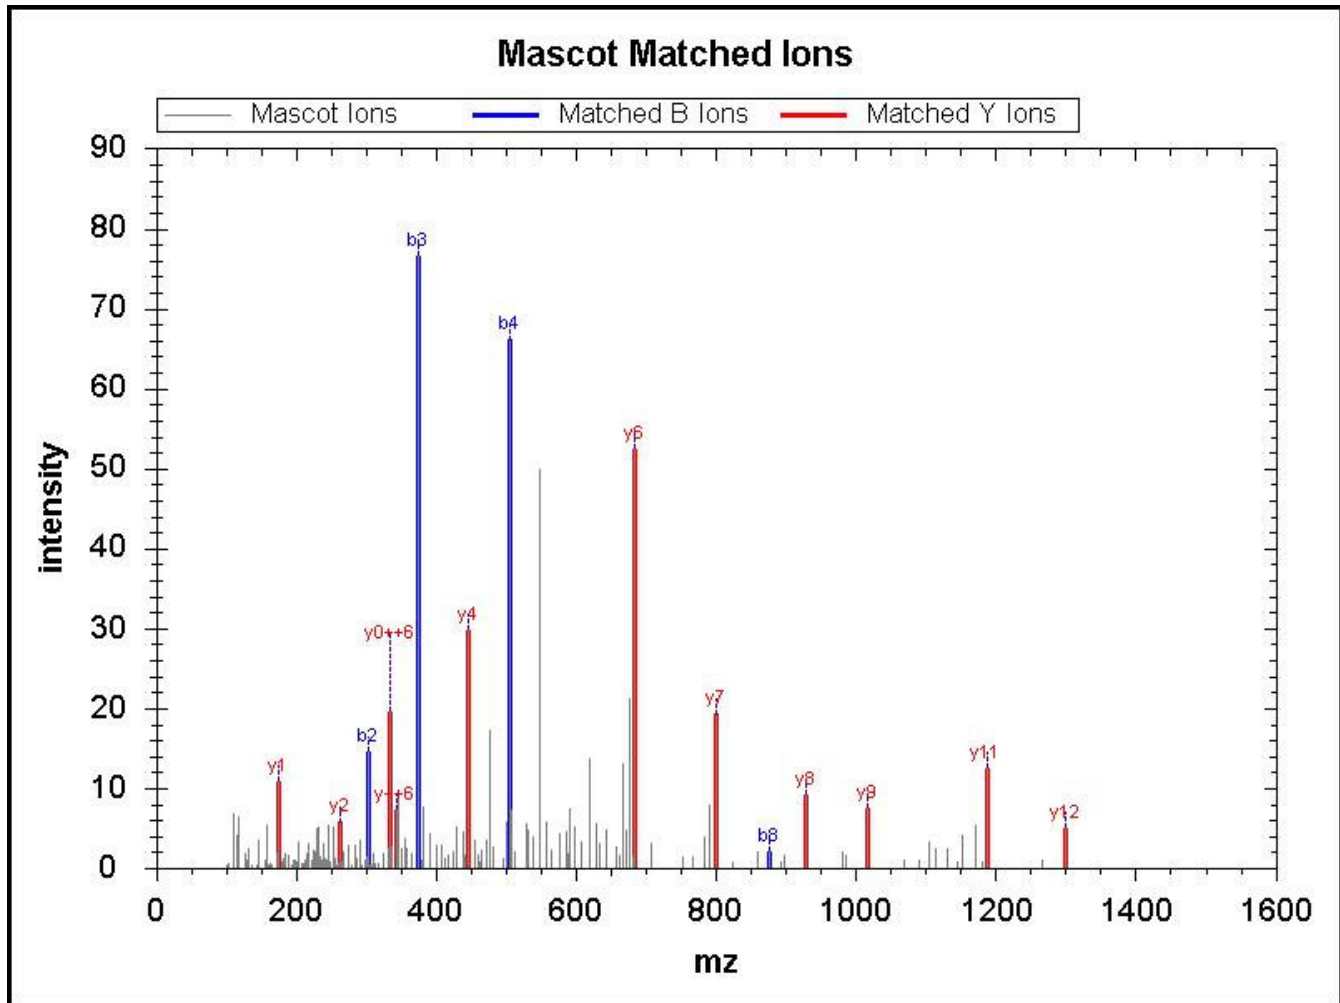

| No | b        | b++    | b*       | b*++   | b0       | b0++   | Seq | y        | y++    | y*       | y*++   | y0       | y0++   | RevNo |
|----|----------|--------|----------|--------|----------|--------|-----|----------|--------|----------|--------|----------|--------|-------|
| 1  | 232.14   | 116.57 |          |        | 214.13   | 107.57 | S   |          |        |          |        |          |        | 16    |
| 2  | 303.18   | 152.09 |          |        | 285.17   | 143.09 | A   | 1,572.74 | 786.88 | 1,555.72 | 778.36 | 1,554.73 | 777.87 | 15    |
| 3  | 374.22   | 187.61 |          |        | 356.21   | 178.61 | A   | 1,501.71 | 751.36 | 1,484.68 | 742.84 | 1,483.70 | 742.35 | 14    |
| 4  | 505.26   | 253.13 |          |        | 487.25   | 244.13 | M   | 1,430.67 | 715.84 | 1,413.64 | 707.33 | 1,412.66 | 706.83 | 13    |
| 5  | 618.34   | 309.67 |          |        | 600.33   | 300.67 | L   | 1,299.63 | 650.32 | 1,282.60 | 641.80 | 1,281.62 | 641.31 | 12    |
| 6  | 675.36   | 338.18 |          |        | 657.35   | 329.18 | G   | 1,186.54 | 593.78 | 1,169.52 | 585.26 | 1,168.53 | 584.77 | 11    |
| 7  | 789.40   | 395.21 | 772.38   | 386.69 | 771.39   | 386.20 | N   | 1,129.52 | 565.27 | 1,112.50 | 556.75 | 1,111.51 | 556.26 | 10    |
| 8  | 876.44   | 438.72 | 859.41   | 430.21 | 858.43   | 429.72 | S   | 1,015.48 | 508.24 | 998.45   | 499.73 | 997.47   | 499.24 | 9     |
| 9  | 1,005.48 | 503.24 | 988.45   | 494.73 | 987.47   | 494.24 | E   | 928.45   | 464.73 | 911.42   | 456.21 | 910.44   | 455.72 | 8     |
| 10 | 1,120.51 | 560.76 | 1,103.48 | 552.24 | 1,102.50 | 551.75 | D   | 799.41   | 400.21 | 782.38   | 391.69 | 781.40   | 391.20 | 7     |
| 11 | 1,257.57 | 629.29 | 1,240.54 | 620.77 | 1,239.55 | 620.28 | H   | 684.38   | 342.69 | 667.35   | 334.18 | 666.37   | 333.69 | 6     |
| 12 | 1,358.61 | 679.81 | 1,341.59 | 671.30 | 1,340.60 | 670.80 | T   | 547.32   | 274.16 | 530.29   | 265.65 | 529.31   | 265.16 | 5     |
| 13 | 1,429.65 | 715.33 | 1,412.62 | 706.82 | 1,411.64 | 706.32 | A   | 446.27   | 223.64 | 429.25   | 215.13 | 428.26   | 214.63 | 4     |
| 14 | 1,542.73 | 771.87 | 1,525.71 | 763.36 | 1,524.72 | 762.87 | L   | 375.24   | 188.12 | 358.21   | 179.61 | 357.22   | 179.12 | 3     |
| 15 | 1,629.77 | 815.39 | 1,612.74 | 806.87 | 1,611.76 | 806.38 | S   | 262.15   | 131.58 | 245.12   | 123.07 | 244.14   | 122.57 | 2     |
| 16 |          |        |          |        |          |        | R   | 175.12   | 88.06  | 158.09   | 79.55  |          |        | 1     |

MS/MS Fragmentation of **RPDVVENQPDAASQLNVDASGNLAK**

Found in **sp|Q9NZL9|MAT2B\_HUMAN**, Methionine adenosyltransferase 2 subunit beta OS=Homo sapiens GN=MAT2B PE=1 SV=1

Match to Query 89469: 2895.495from(724.881,4+)

Title: 411: Scan 986 (rt=31.5413, f=3, i=142) [D:\lab212\membrane\Grace\Joyce\iTRAQ\_38\_2.raw]

Data File: Submitted from 20120508-1(merge) by Mascot Daemon on JOYCE-VAIO

Monoisotopic mass of neutral peptide Mr(calc): 2895.495

Variable modifications:

K25 iTRAQ4plex (K)

Ions Score: 91.66 Expect: 0.000

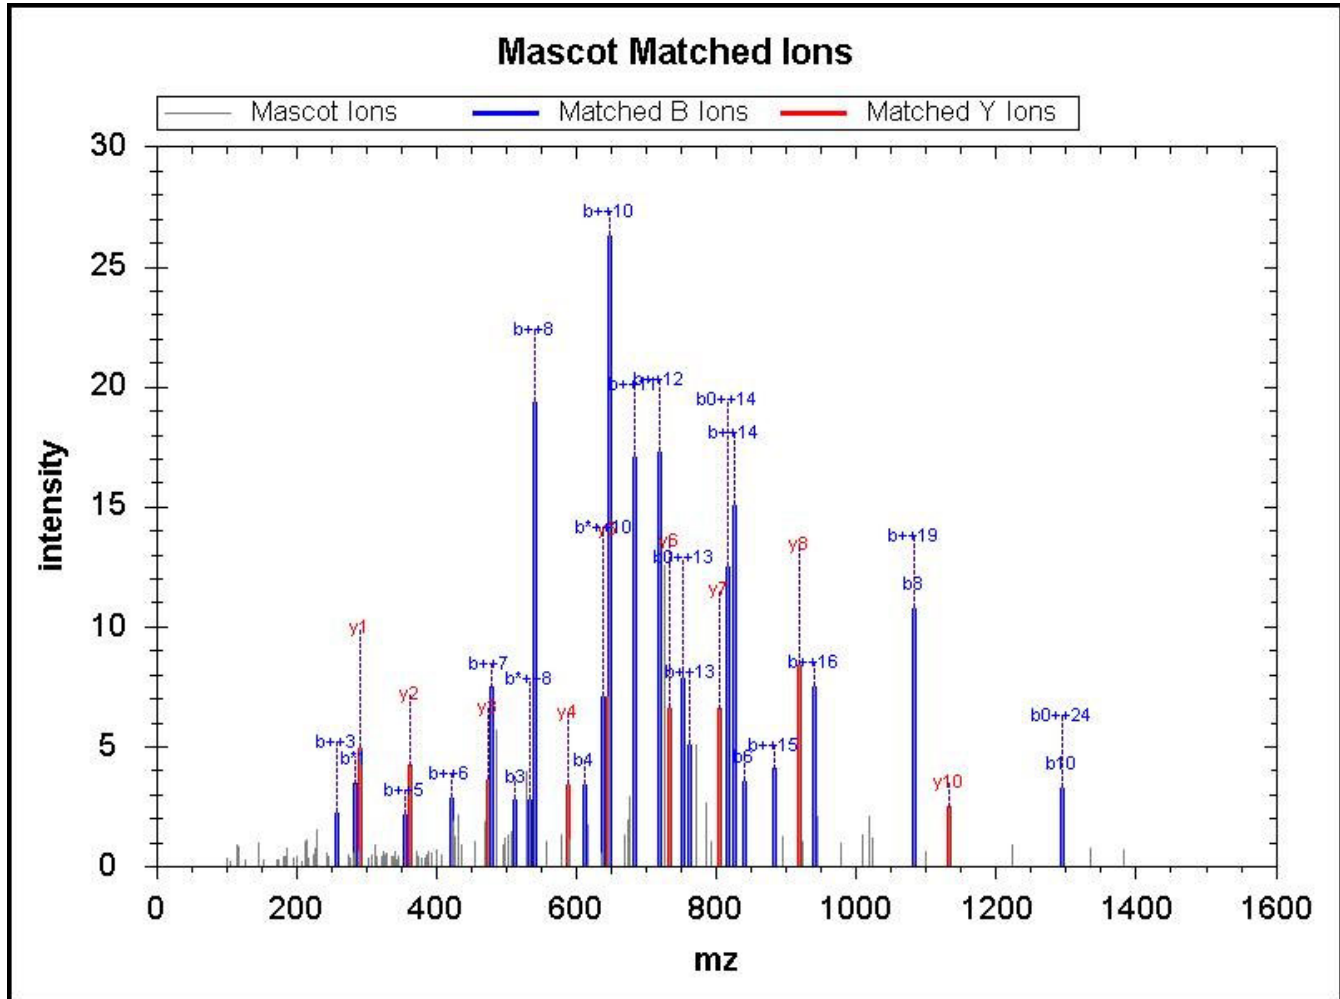

| No | b        | b++    | b*       | b*+    | b0       | b0++   | Seq | y        | y++      | y*       | y*+      | y0       | y0++     | RevNo |
|----|----------|--------|----------|--------|----------|--------|-----|----------|----------|----------|----------|----------|----------|-------|
| 1  | 301.21   | 151.11 | 284.18   | 142.60 |          |        | R   |          |          |          |          |          |          | 25    |
| 2  | 398.26   | 199.64 | 381.24   | 191.12 |          |        | P   | 2,596.30 | 1,298.65 | 2,579.27 | 1,290.14 | 2,578.29 | 1,289.65 | 24    |
| 3  | 513.29   | 257.15 | 496.26   | 248.64 | 495.28   | 248.14 | D   | 2,499.24 | 1,250.13 | 2,482.22 | 1,241.61 | 2,481.23 | 1,241.12 | 23    |
| 4  | 612.36   | 306.68 | 595.33   | 298.17 | 594.35   | 297.68 | V   | 2,384.22 | 1,192.61 | 2,367.19 | 1,184.10 | 2,366.21 | 1,183.61 | 22    |
| 5  | 711.43   | 356.22 | 694.40   | 347.70 | 693.42   | 347.21 | V   | 2,285.15 | 1,143.08 | 2,268.12 | 1,134.56 | 2,267.14 | 1,134.07 | 21    |
| 6  | 840.47   | 420.74 | 823.44   | 412.23 | 822.46   | 411.73 | E   | 2,186.08 | 1,093.54 | 2,169.05 | 1,085.03 | 2,168.07 | 1,084.54 | 20    |
| 7  | 954.51   | 477.76 | 937.49   | 469.25 | 936.50   | 468.75 | N   | 2,057.04 | 1,029.02 | 2,040.01 | 1,020.51 | 2,039.03 | 1,020.02 | 19    |
| 8  | 1,082.57 | 541.79 | 1,065.54 | 533.28 | 1,064.56 | 532.78 | Q   | 1,942.99 | 972.00   | 1,925.97 | 963.49   | 1,924.98 | 963.00   | 18    |
| 9  | 1,179.62 | 590.32 | 1,162.60 | 581.80 | 1,161.61 | 581.31 | P   | 1,814.94 | 907.97   | 1,797.91 | 899.46   | 1,796.93 | 898.97   | 17    |
| 10 | 1,294.65 | 647.83 | 1,277.62 | 639.32 | 1,276.64 | 638.82 | D   | 1,717.88 | 859.45   | 1,700.86 | 850.93   | 1,699.87 | 850.44   | 16    |
| 11 | 1,365.69 | 683.35 | 1,348.66 | 674.83 | 1,347.68 | 674.34 | A   | 1,602.86 | 801.93   | 1,585.83 | 793.42   | 1,584.85 | 792.93   | 15    |
| 12 | 1,436.73 | 718.87 | 1,419.70 | 710.35 | 1,418.71 | 709.86 | A   | 1,531.82 | 766.41   | 1,514.79 | 757.90   | 1,513.81 | 757.41   | 14    |
| 13 | 1,523.76 | 762.38 | 1,506.73 | 753.87 | 1,505.75 | 753.38 | S   | 1,460.78 | 730.89   | 1,443.76 | 722.38   | 1,442.77 | 721.89   | 13    |
| 14 | 1,651.82 | 826.41 | 1,634.79 | 817.90 | 1,633.81 | 817.41 | Q   | 1,373.75 | 687.38   | 1,356.72 | 678.87   | 1,355.74 | 678.37   | 12    |
| 15 | 1,764.90 | 882.95 | 1,747.87 | 874.44 | 1,746.89 | 873.95 | L   | 1,245.69 | 623.35   | 1,228.67 | 614.84   | 1,227.68 | 614.34   | 11    |
| 16 | 1,878.94 | 939.98 | 1,861.92 | 931.46 | 1,860.93 | 930.97 | N   | 1,132.61 | 566.81   | 1,115.58 | 558.29   | 1,114.60 | 557.80   | 10    |

|    |          |          |          |          |          |          |   |          |        |          |        |          |        |   |
|----|----------|----------|----------|----------|----------|----------|---|----------|--------|----------|--------|----------|--------|---|
| 17 | 1,978.01 | 989.51   | 1,960.98 | 981.00   | 1,960.00 | 980.50   | V | 1,018.56 | 509.79 | 1,001.54 | 501.27 | 1,000.55 | 500.78 | 9 |
| 18 | 2,093.04 | 1,047.02 | 2,076.01 | 1,038.51 | 2,075.03 | 1,038.02 | D | 919.50   | 460.25 | 902.47   | 451.74 | 901.49   | 451.25 | 8 |
| 19 | 2,164.08 | 1,082.54 | 2,147.05 | 1,074.03 | 2,146.06 | 1,073.54 | A | 804.47   | 402.74 | 787.44   | 394.23 | 786.46   | 393.73 | 7 |
| 20 | 2,251.11 | 1,126.06 | 2,234.08 | 1,117.54 | 2,233.10 | 1,117.05 | S | 733.43   | 367.22 | 716.41   | 358.71 | 715.42   | 358.21 | 6 |
| 21 | 2,308.13 | 1,154.57 | 2,291.10 | 1,146.05 | 2,290.12 | 1,145.56 | G | 646.40   | 323.70 | 629.37   | 315.19 |          |        | 5 |
| 22 | 2,422.17 | 1,211.59 | 2,405.15 | 1,203.08 | 2,404.16 | 1,202.58 | N | 589.38   | 295.19 | 572.35   | 286.68 |          |        | 4 |
| 23 | 2,535.26 | 1,268.13 | 2,518.23 | 1,259.62 | 2,517.25 | 1,259.13 | L | 475.34   | 238.17 | 458.31   | 229.66 |          |        | 3 |
| 24 | 2,606.29 | 1,303.65 | 2,589.27 | 1,295.14 | 2,588.28 | 1,294.64 | A | 362.25   | 181.63 | 345.23   | 173.12 |          |        | 2 |
| 25 |          |          |          |          |          |          | K | 291.21   | 146.11 | 274.19   | 137.60 |          |        | 1 |

Query 62397 Hit 1

MS/MS Fragmentation of ENLELILTQSVENVGVR

Found in sp|Q9BYD2|RM09\_HUMAN, 39S ribosomal protein L9

Match to Query 62397: 2056.126from(686.3827,3+)

Title: 829: Sum of 2 scans in range 2320 (rt=59.597, f=4, i=551) to 2321 (rt=59.6224, f=4, i=552)

[D:\lab212\membrane\GraceJoyce20120320\_iTRAQ\_20-2.raw]

Data File: Submitted from 20120508-1(merge) by Mascot Daemon on JOYCE-VAIO

Monoisotopic mass of neutral peptide Mr(calc): 2056.126

Variable modifications:

Ions Score: 90.38 Expect: 0.000

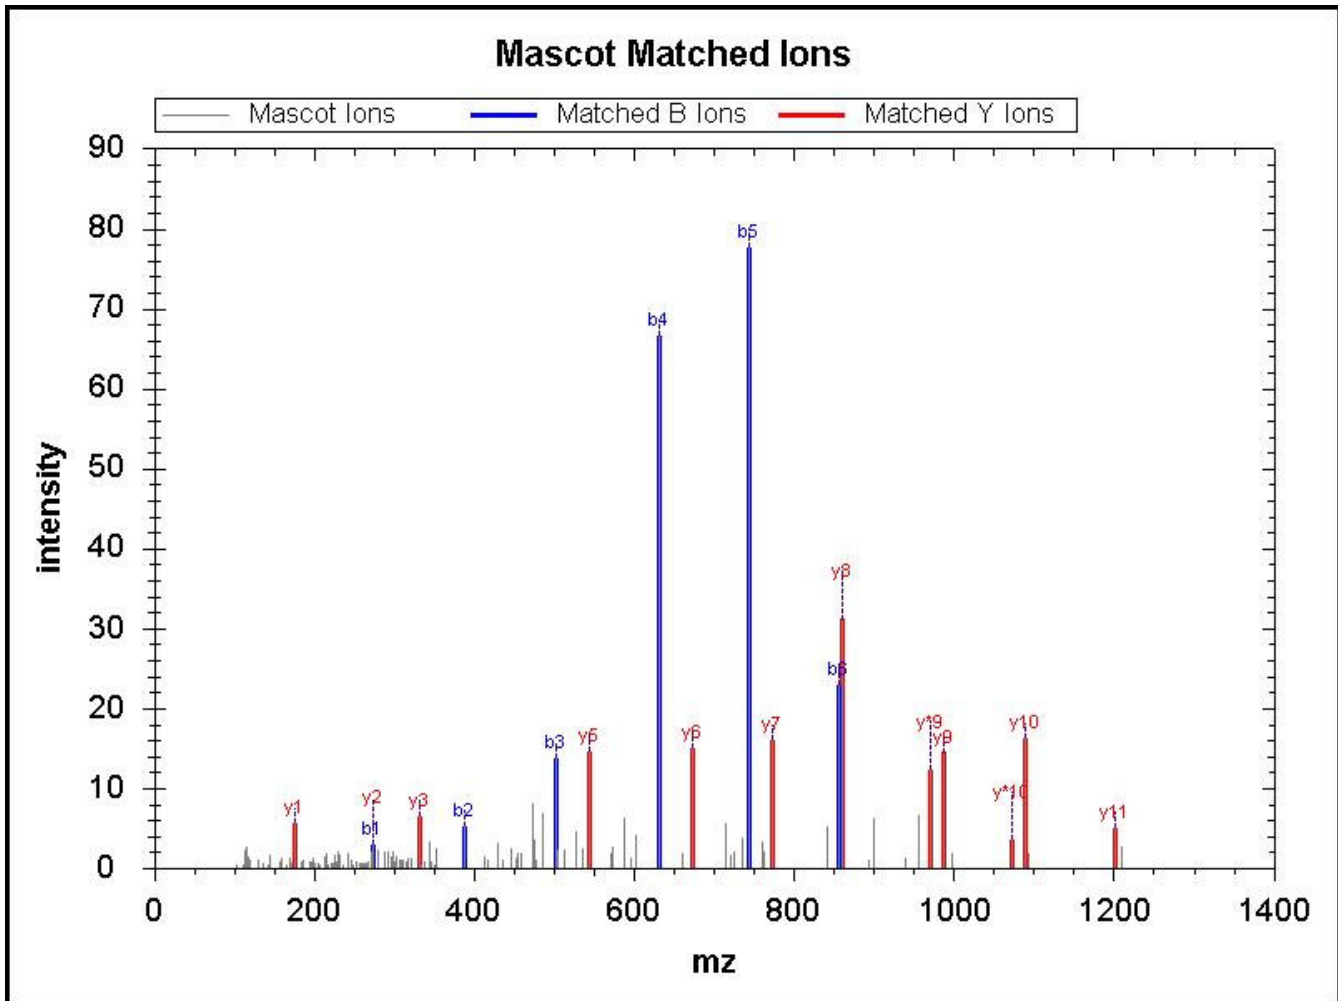

| No | b      | b++    | b*     | b*++   | b0     | b0++   | Seq | y        | y++    | y*       | y*++   | y0       | y0++   | RevNo |
|----|--------|--------|--------|--------|--------|--------|-----|----------|--------|----------|--------|----------|--------|-------|
| 1  | 274.15 | 137.58 |        |        | 256.14 | 128.57 | E   |          |        |          |        |          |        | 17    |
| 2  | 388.19 | 194.60 | 371.17 | 186.09 | 370.18 | 185.60 | N   | 1,783.99 | 892.50 | 1,766.96 | 883.99 | 1,765.98 | 883.49 | 16    |
| 3  | 501.28 | 251.14 | 484.25 | 242.63 | 483.27 | 242.14 | L   | 1,669.95 | 835.48 | 1,652.92 | 826.96 | 1,651.94 | 826.47 | 15    |
| 4  | 630.32 | 315.66 | 613.29 | 307.15 | 612.31 | 306.66 | E   | 1,556.86 | 778.94 | 1,539.84 | 770.42 | 1,538.85 | 769.93 | 14    |
| 5  | 743.41 | 372.21 | 726.38 | 363.69 | 725.40 | 363.20 | L   | 1,427.82 | 714.41 | 1,410.80 | 705.90 | 1,409.81 | 705.41 | 13    |

|    |          |        |          |        |          |        |   |          |        |          |        |          |        |    |
|----|----------|--------|----------|--------|----------|--------|---|----------|--------|----------|--------|----------|--------|----|
| 6  | 856.49   | 428.75 | 839.46   | 420.24 | 838.48   | 419.74 | I | 1,314.74 | 657.87 | 1,297.71 | 649.36 | 1,296.73 | 648.87 | 12 |
| 7  | 969.57   | 485.29 | 952.55   | 476.78 | 951.56   | 476.29 | L | 1,201.65 | 601.33 | 1,184.63 | 592.82 | 1,183.64 | 592.33 | 11 |
| 8  | 1,070.62 | 535.81 | 1,053.59 | 527.30 | 1,052.61 | 526.81 | T | 1,088.57 | 544.79 | 1,071.54 | 536.28 | 1,070.56 | 535.78 | 10 |
| 9  | 1,198.68 | 599.84 | 1,181.65 | 591.33 | 1,180.67 | 590.84 | Q | 987.52   | 494.26 | 970.50   | 485.75 | 969.51   | 485.26 | 9  |
| 10 | 1,285.71 | 643.36 | 1,268.69 | 634.85 | 1,267.70 | 634.35 | S | 859.46   | 430.24 | 842.44   | 421.72 | 841.45   | 421.23 | 8  |
| 11 | 1,384.78 | 692.89 | 1,367.75 | 684.38 | 1,366.77 | 683.89 | V | 772.43   | 386.72 | 755.40   | 378.21 | 754.42   | 377.71 | 7  |
| 12 | 1,513.82 | 757.42 | 1,496.80 | 748.90 | 1,495.81 | 748.41 | E | 673.36   | 337.18 | 656.34   | 328.67 | 655.35   | 328.18 | 6  |
| 13 | 1,627.87 | 814.44 | 1,610.84 | 805.92 | 1,609.86 | 805.43 | N | 544.32   | 272.66 | 527.29   | 264.15 |          |        | 5  |
| 14 | 1,726.93 | 863.97 | 1,709.91 | 855.46 | 1,708.92 | 854.97 | V | 430.28   | 215.64 | 413.25   | 207.13 |          |        | 4  |
| 15 | 1,783.96 | 892.48 | 1,766.93 | 883.97 | 1,765.95 | 883.48 | G | 331.21   | 166.11 | 314.18   | 157.59 |          |        | 3  |
| 16 | 1,883.02 | 942.02 | 1,866.00 | 933.50 | 1,865.01 | 933.01 | V | 274.19   | 137.60 | 257.16   | 129.08 |          |        | 2  |
| 17 |          |        |          |        |          |        | R | 175.12   | 88.06  | 158.09   | 79.55  |          |        | 1  |

Query 97263 Hit 1

MS/MS Fragmentation of **GNKPDFHLAMPTEQAEGFYNSFLEQLR**

Found in **sp|Q8TEA8|DTD1\_HUMAN**, D-tyrosyl-tRNA(Tyr) deacylase 1 OS=Homo sapiens GN=DTD1 PE=1 SV=2

Match to Query 97263: 3426.685from(857.6785,4+)

Title: 963: Sum of 2 scans in range 2316 (rt=60.901, f=4, i=643) to 2317 (rt=60.9264, f=4, i=644)

[D:\lab212\membrane\Grace\Joyce\iTRAQ\_46\_2.raw]

Data File: Submitted from 20120508-1(merge) by Mascot Daemon on JOYCE-VAIO

Monoisotopic mass of neutral peptide Mr(calc): 3426.685

Variable modifications:

K3 iTRAQ4plex (K)

Ions Score: 88.98 Expect: 0.000

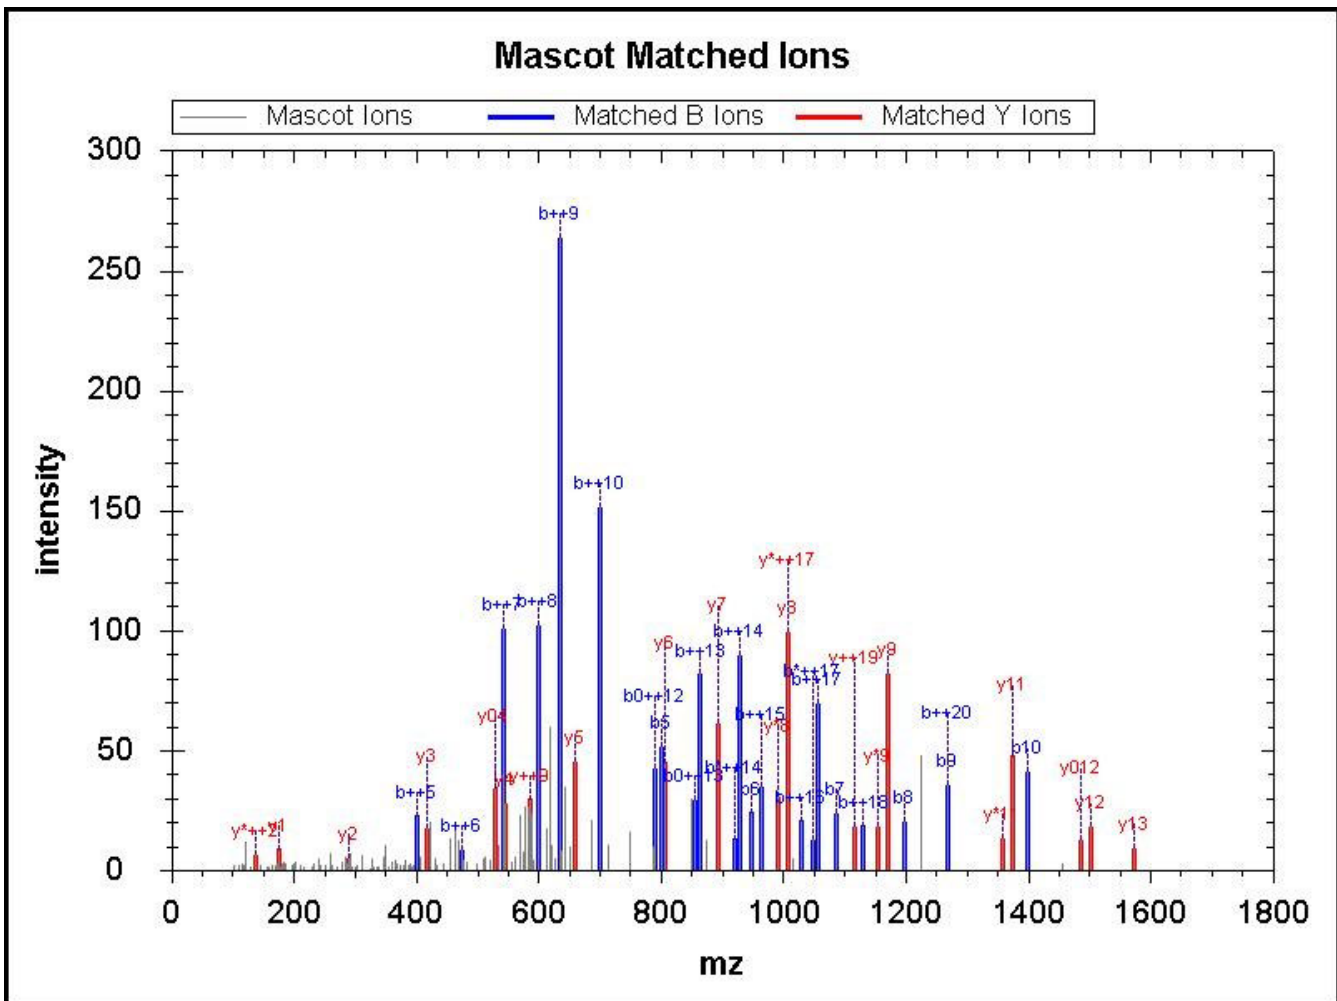

|    |          |          |          |          |          |          |   |          |          |          |          |          |          |    |
|----|----------|----------|----------|----------|----------|----------|---|----------|----------|----------|----------|----------|----------|----|
| 2  | 316.17   | 158.59   | 299.15   | 150.08   |          |          | N | 3,226.57 | 1,613.79 | 3,209.55 | 1,605.28 | 3,208.56 | 1,604.79 | 26 |
| 3  | 588.37   | 294.69   | 571.34   | 286.18   |          |          | K | 3,112.53 | 1,556.77 | 3,095.50 | 1,548.26 | 3,094.52 | 1,547.76 | 25 |
| 4  | 685.42   | 343.22   | 668.40   | 334.70   |          |          | P | 2,840.33 | 1,420.67 | 2,823.31 | 1,412.16 | 2,822.32 | 1,411.67 | 24 |
| 5  | 800.45   | 400.73   | 783.42   | 392.22   | 782.44   | 391.72   | D | 2,743.28 | 1,372.14 | 2,726.26 | 1,363.63 | 2,725.27 | 1,363.14 | 23 |
| 6  | 947.52   | 474.26   | 930.49   | 465.75   | 929.51   | 465.26   | F | 2,628.25 | 1,314.63 | 2,611.23 | 1,306.12 | 2,610.24 | 1,305.63 | 22 |
| 7  | 1,084.58 | 542.79   | 1,067.55 | 534.28   | 1,066.57 | 533.79   | H | 2,481.19 | 1,241.10 | 2,464.16 | 1,232.58 | 2,463.18 | 1,232.09 | 21 |
| 8  | 1,197.66 | 599.33   | 1,180.64 | 590.82   | 1,179.65 | 590.33   | L | 2,344.13 | 1,172.57 | 2,327.10 | 1,164.05 | 2,326.12 | 1,163.56 | 20 |
| 9  | 1,268.70 | 634.85   | 1,251.67 | 626.34   | 1,250.69 | 625.85   | A | 2,231.04 | 1,116.03 | 2,214.02 | 1,107.51 | 2,213.03 | 1,107.02 | 19 |
| 10 | 1,399.74 | 700.37   | 1,382.71 | 691.86   | 1,381.73 | 691.37   | M | 2,160.01 | 1,080.51 | 2,142.98 | 1,071.99 | 2,142.00 | 1,071.50 | 18 |
| 11 | 1,496.79 | 748.90   | 1,479.77 | 740.39   | 1,478.78 | 739.89   | P | 2,028.97 | 1,014.99 | 2,011.94 | 1,006.47 | 2,010.96 | 1,005.98 | 17 |
| 12 | 1,597.84 | 799.42   | 1,580.81 | 790.91   | 1,579.83 | 790.42   | T | 1,931.91 | 966.46   | 1,914.89 | 957.95   | 1,913.90 | 957.46   | 16 |
| 13 | 1,726.88 | 863.95   | 1,709.86 | 855.43   | 1,708.87 | 854.94   | E | 1,830.87 | 915.94   | 1,813.84 | 907.42   | 1,812.86 | 906.93   | 15 |
| 14 | 1,854.94 | 927.97   | 1,837.91 | 919.46   | 1,836.93 | 918.97   | Q | 1,701.82 | 851.42   | 1,684.80 | 842.90   | 1,683.81 | 842.41   | 14 |
| 15 | 1,925.98 | 963.49   | 1,908.95 | 954.98   | 1,907.97 | 954.49   | A | 1,573.76 | 787.39   | 1,556.74 | 778.87   | 1,555.75 | 778.38   | 13 |
| 16 | 2,055.02 | 1,028.01 | 2,037.99 | 1,019.50 | 2,037.01 | 1,019.01 | E | 1,502.73 | 751.87   | 1,485.70 | 743.35   | 1,484.72 | 742.86   | 12 |
| 17 | 2,112.04 | 1,056.52 | 2,095.02 | 1,048.01 | 2,094.03 | 1,047.52 | G | 1,373.68 | 687.35   | 1,356.66 | 678.83   | 1,355.67 | 678.34   | 11 |
| 18 | 2,259.11 | 1,130.06 | 2,242.08 | 1,121.55 | 2,241.10 | 1,121.05 | F | 1,316.66 | 658.84   | 1,299.64 | 650.32   | 1,298.65 | 649.83   | 10 |
| 19 | 2,422.17 | 1,211.59 | 2,405.15 | 1,203.08 | 2,404.16 | 1,202.59 | Y | 1,169.59 | 585.30   | 1,152.57 | 576.79   | 1,151.58 | 576.30   | 9  |
| 20 | 2,536.22 | 1,268.61 | 2,519.19 | 1,260.10 | 2,518.21 | 1,259.61 | N | 1,006.53 | 503.77   | 989.51   | 495.26   | 988.52   | 494.76   | 8  |
| 21 | 2,623.25 | 1,312.13 | 2,606.22 | 1,303.61 | 2,605.24 | 1,303.12 | S | 892.49   | 446.75   | 875.46   | 438.23   | 874.48   | 437.74   | 7  |
| 22 | 2,770.32 | 1,385.66 | 2,753.29 | 1,377.15 | 2,752.31 | 1,376.66 | F | 805.46   | 403.23   | 788.43   | 394.72   | 787.45   | 394.23   | 6  |
| 23 | 2,883.40 | 1,442.20 | 2,866.37 | 1,433.69 | 2,865.39 | 1,433.20 | L | 658.39   | 329.70   | 641.36   | 321.18   | 640.38   | 320.69   | 5  |
| 24 | 3,012.44 | 1,506.73 | 2,995.42 | 1,498.21 | 2,994.43 | 1,497.72 | E | 545.30   | 273.16   | 528.28   | 264.64   | 527.29   | 264.15   | 4  |
| 25 | 3,140.50 | 1,570.75 | 3,123.48 | 1,562.24 | 3,122.49 | 1,561.75 | Q | 416.26   | 208.63   | 399.24   | 200.12   |          |          | 3  |
| 26 | 3,253.59 | 1,627.30 | 3,236.56 | 1,618.78 | 3,235.58 | 1,618.29 | L | 288.20   | 144.61   | 271.18   | 136.09   |          |          | 2  |
| 27 |          |          |          |          |          |          | R | 175.12   | 88.06    | 158.09   | 79.55    |          |          | 1  |

Query 77140 Hit 1

MS/MS Fragmentation of **DLLEQMM AEMIGEPDLHR**

Found in **sp|Q9H4I3|TRABD\_HUMAN**, TraB domain-containing protein OS=Homo sapiens GN=TRABD PE=2 SV=1

Match to Query 77140: 2418.153from(807.0583,3+)

Title: 1243: Sum of 2 scans in range 3182 (rt=78.9956, f=2, i=555) to 3183 (rt=79.021, f=2, i=556)

[D:\lab212\membrane\GraceJoyce\TRAQ\_31\_1.raw]

Data File:Submitted from 20120508-1(merge) by Mascot Daemon on JOYCE-VAIO

Monoisotopic mass of neutral peptide Mr(calc): 2418.153

Variable modifications:

Ions Score: 88.71 Expect: 0.000

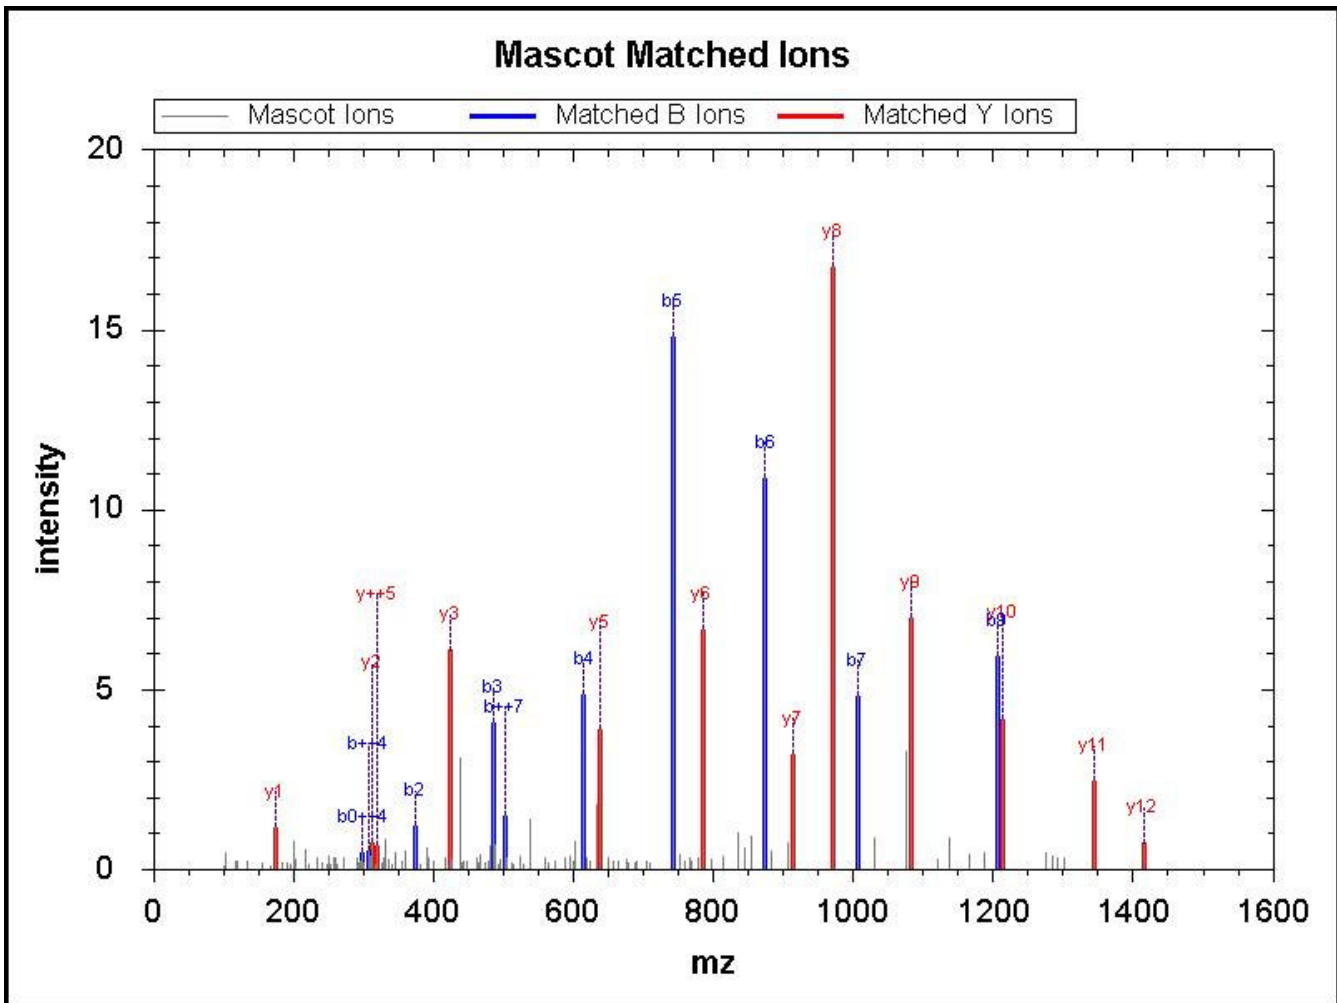

| No | b        | b++      | b*       | b*++     | b0       | b0++     | Seq | y        | y++      | y*       | y*++     | y0       | y0++     | RevNo |
|----|----------|----------|----------|----------|----------|----------|-----|----------|----------|----------|----------|----------|----------|-------|
| 1  | 260.14   | 130.57   |          |          | 242.13   | 121.57   | D   |          |          |          |          |          |          | 19    |
| 2  | 373.22   | 187.11   |          |          | 355.21   | 178.11   | L   | 2,160.03 | 1,080.52 | 2,143.00 | 1,072.00 | 2,142.02 | 1,071.51 | 18    |
| 3  | 486.30   | 243.66   |          |          | 468.29   | 234.65   | L   | 2,046.94 | 1,023.98 | 2,029.92 | 1,015.46 | 2,028.93 | 1,014.97 | 17    |
| 4  | 615.35   | 308.18   |          |          | 597.34   | 299.17   | E   | 1,933.86 | 967.43   | 1,916.83 | 958.92   | 1,915.85 | 958.43   | 16    |
| 5  | 743.41   | 372.21   | 726.38   | 363.69   | 725.40   | 363.20   | Q   | 1,804.82 | 902.91   | 1,787.79 | 894.40   | 1,786.81 | 893.91   | 15    |
| 6  | 874.45   | 437.73   | 857.42   | 429.21   | 856.44   | 428.72   | M   | 1,676.76 | 838.88   | 1,659.73 | 830.37   | 1,658.75 | 829.88   | 14    |
| 7  | 1,005.49 | 503.25   | 988.46   | 494.73   | 987.48   | 494.24   | M   | 1,545.72 | 773.36   | 1,528.69 | 764.85   | 1,527.71 | 764.36   | 13    |
| 8  | 1,076.52 | 538.77   | 1,059.50 | 530.25   | 1,058.51 | 529.76   | A   | 1,414.68 | 707.84   | 1,397.65 | 699.33   | 1,396.67 | 698.84   | 12    |
| 9  | 1,205.57 | 603.29   | 1,188.54 | 594.77   | 1,187.56 | 594.28   | E   | 1,343.64 | 672.32   | 1,326.61 | 663.81   | 1,325.63 | 663.32   | 11    |
| 10 | 1,336.61 | 668.81   | 1,319.58 | 660.29   | 1,318.60 | 659.80   | M   | 1,214.60 | 607.80   | 1,197.57 | 599.29   | 1,196.59 | 598.80   | 10    |
| 11 | 1,449.69 | 725.35   | 1,432.66 | 716.84   | 1,431.68 | 716.34   | I   | 1,083.56 | 542.28   | 1,066.53 | 533.77   | 1,065.55 | 533.28   | 9     |
| 12 | 1,506.71 | 753.86   | 1,489.69 | 745.35   | 1,488.70 | 744.85   | G   | 970.47   | 485.74   | 953.45   | 477.23   | 952.46   | 476.74   | 8     |
| 13 | 1,635.76 | 818.38   | 1,618.73 | 809.87   | 1,617.74 | 809.38   | E   | 913.45   | 457.23   | 896.43   | 448.72   | 895.44   | 448.22   | 7     |
| 14 | 1,782.82 | 891.92   | 1,765.80 | 883.40   | 1,764.81 | 882.91   | F   | 784.41   | 392.71   | 767.38   | 384.20   | 766.40   | 383.70   | 6     |
| 15 | 1,879.88 | 940.44   | 1,862.85 | 931.93   | 1,861.87 | 931.44   | P   | 637.34   | 319.17   | 620.32   | 310.66   | 619.33   | 310.17   | 5     |
| 16 | 1,994.90 | 997.96   | 1,977.88 | 989.44   | 1,976.89 | 988.95   | D   | 540.29   | 270.65   | 523.26   | 262.13   | 522.28   | 261.64   | 4     |
| 17 | 2,107.99 | 1,054.50 | 2,090.96 | 1,045.98 | 2,089.98 | 1,045.49 | L   | 425.26   | 213.13   | 408.24   | 204.62   |          |          | 3     |
| 18 | 2,245.05 | 1,123.03 | 2,228.02 | 1,114.51 | 2,227.04 | 1,114.02 | H   | 312.18   | 156.59   | 295.15   | 148.08   |          |          | 2     |
| 19 |          |          |          |          |          |          | R   | 175.12   | 88.06    | 158.09   | 79.55    |          |          | 1     |

Query 60468 Hit 1

MS/MS Fragmentation of **ENIASVLENYHTESK**

Found in **sp|Q6NVY1|HIBCH\_HUMAN**, 3-hydroxyisobutyryl-CoA hydrolase

Match to Query 60468: 2021.006from(674.6758,3+)



Title: 575: Sum of 2 scans in range 1275 (rt=38.4732, f=4, i=391) to 1276 (rt=38.4986, f=4, i=392)  
 [D:\lab212\membrane\GraceJoyce\iTRAQ40.raw]  
 Data File: Submitted from 20120508-1(merge) by Mascot Daemon on JOYCE-VAIO  
 Monoisotopic mass of neutral peptide Mr(calc): 2021.006  
 Variable modifications:  
 K15 iTRAQ4plex (K)  
 Ions Score: 87.95 Expect: 0.000

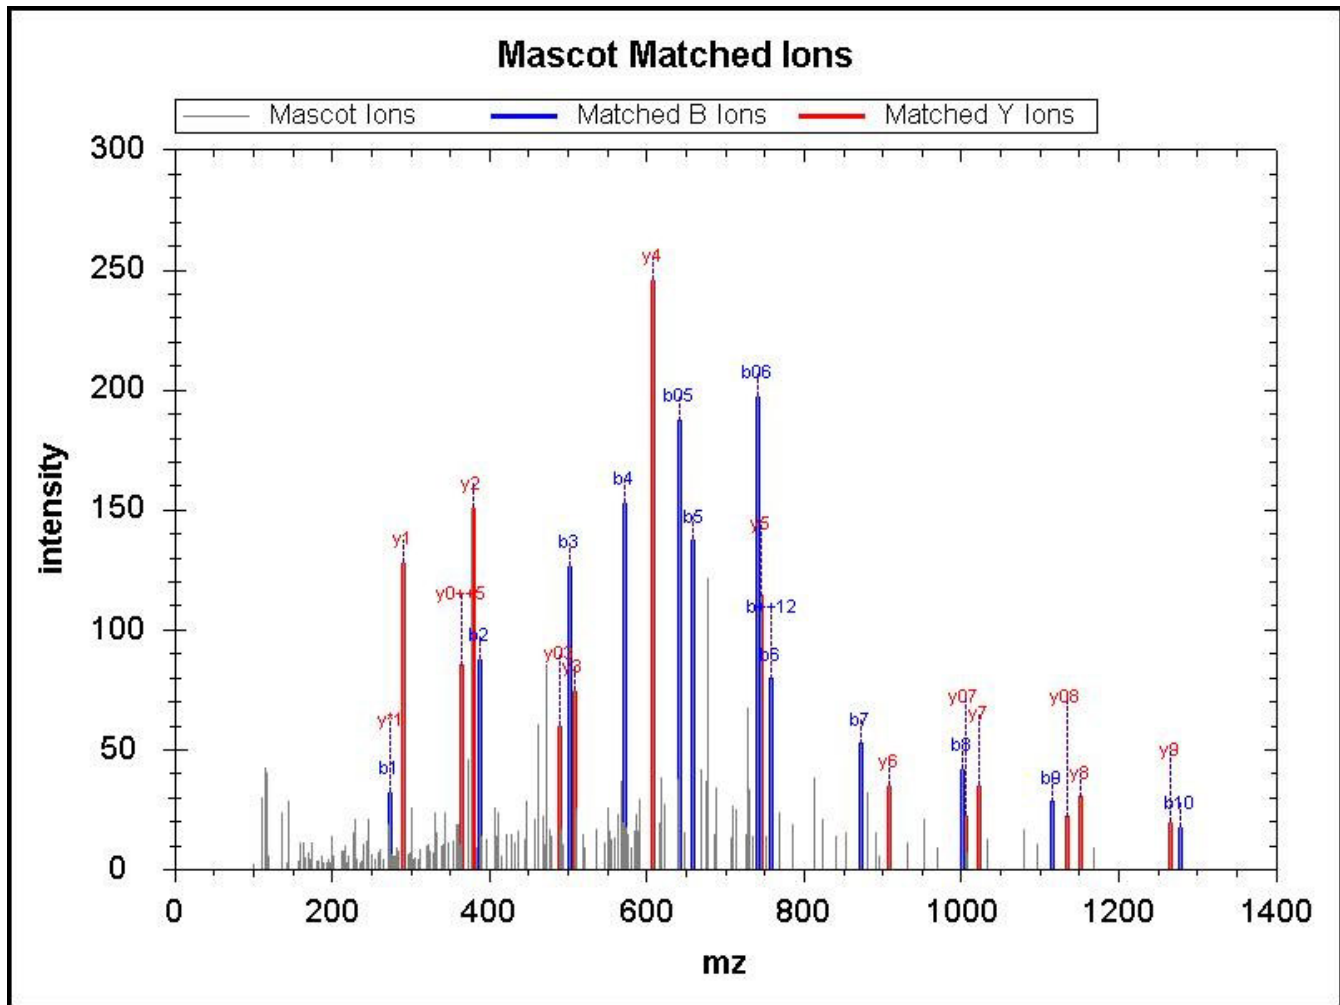

| No | b        | b++    | b*       | b*++   | b0       | b0++   | Seq | y        | y++    | y*       | y*++   | y0       | y0++   | RevNo |
|----|----------|--------|----------|--------|----------|--------|-----|----------|--------|----------|--------|----------|--------|-------|
| 1  | 274.15   | 137.58 |          |        | 256.14   | 128.57 | E   |          |        |          |        |          |        | 15    |
| 2  | 388.19   | 194.60 | 371.17   | 186.09 | 370.18   | 185.60 | N   | 1,748.89 | 874.95 | 1,731.87 | 866.44 | 1,730.88 | 865.95 | 14    |
| 3  | 501.28   | 251.14 | 484.25   | 242.63 | 483.27   | 242.14 | I   | 1,634.85 | 817.93 | 1,617.82 | 809.42 | 1,616.84 | 808.92 | 13    |
| 4  | 572.32   | 286.66 | 555.29   | 278.15 | 554.31   | 277.66 | A   | 1,521.77 | 761.39 | 1,504.74 | 752.87 | 1,503.76 | 752.38 | 12    |
| 5  | 659.35   | 330.18 | 642.32   | 321.66 | 641.34   | 321.17 | S   | 1,450.73 | 725.87 | 1,433.70 | 717.36 | 1,432.72 | 716.86 | 11    |
| 6  | 758.42   | 379.71 | 741.39   | 371.20 | 740.41   | 370.71 | V   | 1,363.70 | 682.35 | 1,346.67 | 673.84 | 1,345.69 | 673.35 | 10    |
| 7  | 871.50   | 436.25 | 854.47   | 427.74 | 853.49   | 427.25 | L   | 1,264.63 | 632.82 | 1,247.60 | 624.30 | 1,246.62 | 623.81 | 9     |
| 8  | 1,000.54 | 500.78 | 983.52   | 492.26 | 982.53   | 491.77 | E   | 1,151.54 | 576.28 | 1,134.52 | 567.76 | 1,133.53 | 567.27 | 8     |
| 9  | 1,114.59 | 557.80 | 1,097.56 | 549.28 | 1,096.58 | 548.79 | N   | 1,022.50 | 511.75 | 1,005.48 | 503.24 | 1,004.49 | 502.75 | 7     |
| 10 | 1,277.65 | 639.33 | 1,260.62 | 630.82 | 1,259.64 | 630.32 | Y   | 908.46   | 454.73 | 891.43   | 446.22 | 890.45   | 445.73 | 6     |
| 11 | 1,414.71 | 707.86 | 1,397.68 | 699.34 | 1,396.70 | 698.85 | H   | 745.40   | 373.20 | 728.37   | 364.69 | 727.39   | 364.20 | 5     |
| 12 | 1,515.76 | 758.38 | 1,498.73 | 749.87 | 1,497.75 | 749.38 | T   | 608.34   | 304.67 | 591.31   | 296.16 | 590.33   | 295.67 | 4     |
| 13 | 1,644.80 | 822.90 | 1,627.77 | 814.39 | 1,626.79 | 813.90 | E   | 507.29   | 254.15 | 490.26   | 245.64 | 489.28   | 245.14 | 3     |
| 14 | 1,731.83 | 866.42 | 1,714.80 | 857.91 | 1,713.82 | 857.41 | S   | 378.25   | 189.63 | 361.22   | 181.11 | 360.24   | 180.62 | 2     |
| 15 |          |        |          |        |          |        | K   | 291.21   | 146.11 | 274.19   | 137.60 |          |        | 1     |

MS/MS Fragmentation of **FYPGQAPSLAENFAEHVLR**

Found in **sp|Q9Y276|BCS1\_HUMAN**, Mitochondrial chaperone BCS1 OS=Homo sapiens GN=BCS1L PE=1 SV=1

Match to Query 72333: 2289.163from(764.0615,3+)

Title: 974: Sum of 2 scans in range 2160 (rt=58.0317, f=4, i=647) to 2161 (rt=58.0571, f=4, i=648)

[D:\lab212\membrane\GraceJoyce\iTRAQ\_31\_1.raw]

Data File:Submitted from 20120508-1(merge) by Mascot Daemon on JOYCE-VAIO

Monoisotopic mass of neutral peptide Mr(calc): 2289.163

Variable modifications:

Ions Score: 87.95 Expect: 0.000

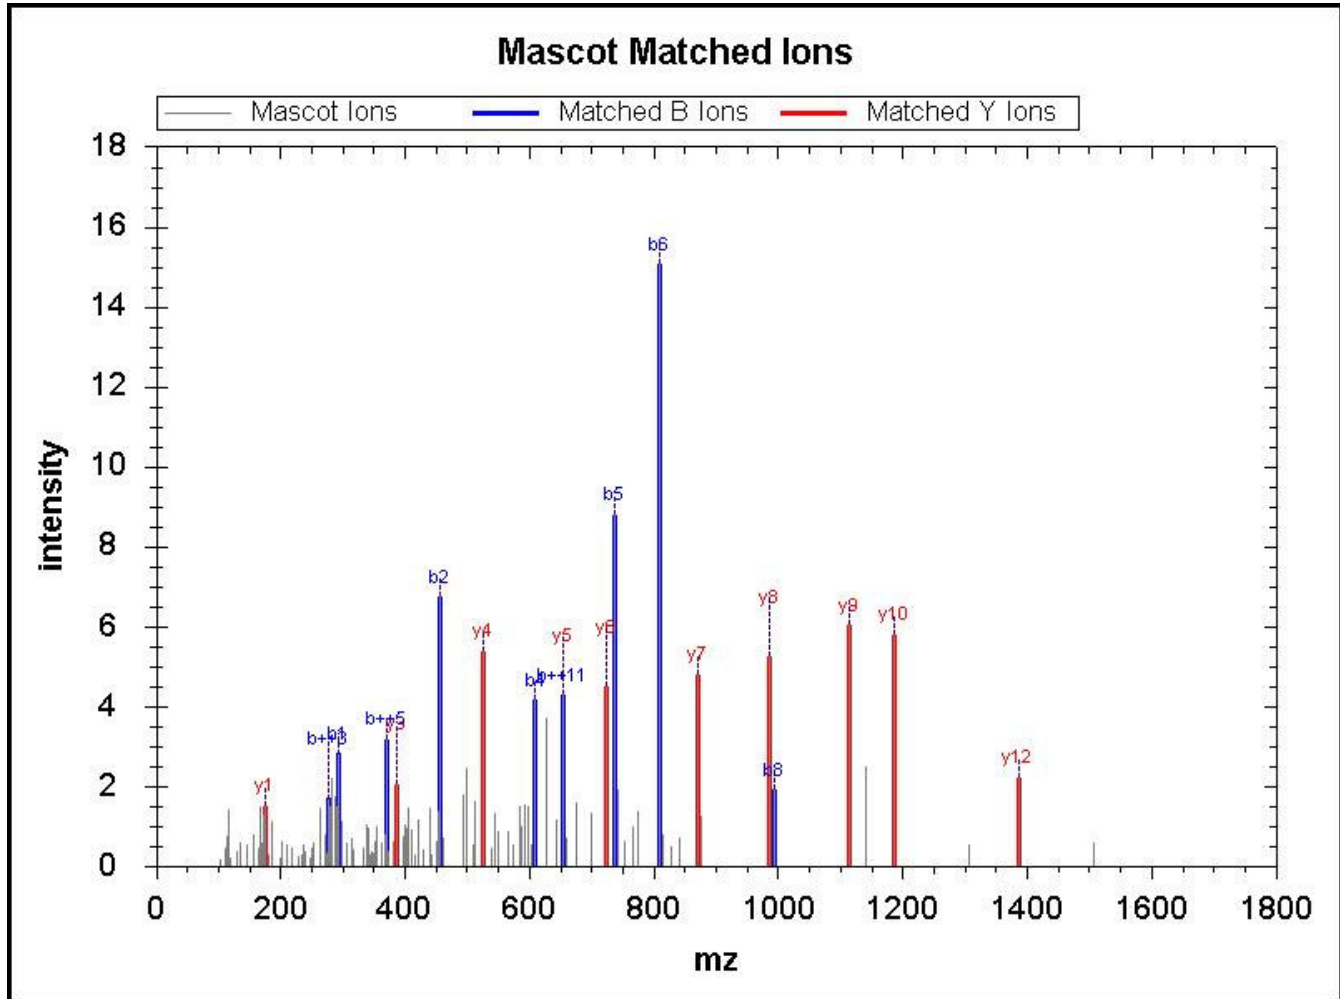

| No | b        | b++    | b*       | b*++   | b0       | b0++   | Seq | y        | y++      | y*       | y*++   | y0       | y0++   | RevNo |
|----|----------|--------|----------|--------|----------|--------|-----|----------|----------|----------|--------|----------|--------|-------|
| 1  | 292.18   | 146.59 |          |        |          |        | F   |          |          |          |        |          |        | 19    |
| 2  | 455.24   | 228.12 |          |        |          |        | Y   | 1,999.00 | 1,000.01 | 1,981.98 | 991.49 | 1,980.99 | 991.00 | 18    |
| 3  | 552.29   | 276.65 |          |        |          |        | P   | 1,835.94 | 918.47   | 1,818.91 | 909.96 | 1,817.93 | 909.47 | 17    |
| 4  | 609.32   | 305.16 |          |        |          |        | G   | 1,738.89 | 869.95   | 1,721.86 | 861.43 | 1,720.88 | 860.94 | 16    |
| 5  | 737.37   | 369.19 | 720.35   | 360.68 |          |        | Q   | 1,681.87 | 841.44   | 1,664.84 | 832.92 | 1,663.85 | 832.43 | 15    |
| 6  | 808.41   | 404.71 | 791.38   | 396.20 |          |        | A   | 1,553.81 | 777.41   | 1,536.78 | 768.89 | 1,535.80 | 768.40 | 14    |
| 7  | 905.46   | 453.24 | 888.44   | 444.72 |          |        | P   | 1,482.77 | 741.89   | 1,465.74 | 733.38 | 1,464.76 | 732.88 | 13    |
| 8  | 992.50   | 496.75 | 975.47   | 488.24 | 974.49   | 487.75 | S   | 1,385.72 | 693.36   | 1,368.69 | 684.85 | 1,367.71 | 684.36 | 12    |
| 9  | 1,105.58 | 553.29 | 1,088.55 | 544.78 | 1,087.57 | 544.29 | L   | 1,298.69 | 649.85   | 1,281.66 | 641.33 | 1,280.67 | 640.84 | 11    |
| 10 | 1,176.62 | 588.81 | 1,159.59 | 580.30 | 1,158.61 | 579.81 | A   | 1,185.60 | 593.30   | 1,168.57 | 584.79 | 1,167.59 | 584.30 | 10    |
| 11 | 1,305.66 | 653.33 | 1,288.63 | 644.82 | 1,287.65 | 644.33 | E   | 1,114.56 | 557.79   | 1,097.54 | 549.27 | 1,096.55 | 548.78 | 9     |
| 12 | 1,419.70 | 710.35 | 1,402.68 | 701.84 | 1,401.69 | 701.35 | N   | 985.52   | 493.26   | 968.49   | 484.75 | 967.51   | 484.26 | 8     |
| 13 | 1,566.77 | 783.89 | 1,549.74 | 775.38 | 1,548.76 | 774.88 | F   | 871.48   | 436.24   | 854.45   | 427.73 | 853.47   | 427.24 | 7     |
| 14 | 1,637.81 | 819.41 | 1,620.78 | 810.89 | 1,619.80 | 810.40 | A   | 724.41   | 362.71   | 707.38   | 354.20 | 706.40   | 353.70 | 6     |
| 15 | 1,766.85 | 883.93 | 1,749.82 | 875.42 | 1,748.84 | 874.92 | E   | 653.37   | 327.19   | 636.35   | 318.68 | 635.36   | 318.18 | 5     |
| 16 | 1,903.91 | 952.46 | 1,886.88 | 943.95 | 1,885.90 | 943.45 | H   | 524.33   | 262.67   | 507.30   | 254.16 |          |        | 4     |

|    |          |          |          |          |          |          |   |        |        |        |        |  |  |   |
|----|----------|----------|----------|----------|----------|----------|---|--------|--------|--------|--------|--|--|---|
| 17 | 2,002.98 | 1,001.99 | 1,985.95 | 993.48   | 1,984.97 | 992.99   | V | 387.27 | 194.14 | 370.24 | 185.63 |  |  | 3 |
| 18 | 2,116.06 | 1,058.53 | 2,099.04 | 1,050.02 | 2,098.05 | 1,049.53 | L | 288.20 | 144.61 | 271.18 | 136.09 |  |  | 2 |
| 19 |          |          |          |          |          |          | R | 175.12 | 88.06  | 158.09 | 79.55  |  |  | 1 |

Query 85886 Hit 1

MS/MS Fragmentation of **LLFGHSTEGDILELVDGHFDK**

Found in **sp|Q9UHY7|ENOPH\_HUMAN**, Enolase-phosphatase E1 OS=Homo sapiens GN=ENOPH1 PE=1 SV=1

Match to Query 85886: 2730.415from(911.1454,3+)

Title: 770: Scan 2291 (rt=59.0828, f=3, i=288) [D:\lab212\membrane\Grace\Joyce\iTRAQ\_46\_1.raw]

Data File: Submitted from 20120508-1(merge) by Mascot Daemon on JOYCE-VAIO

Monoisotopic mass of neutral peptide Mr(calc): 2730.415

Variable modifications:

K22 iTRAQ4plex (K)

Ions Score: 85.64 Expect: 0.000

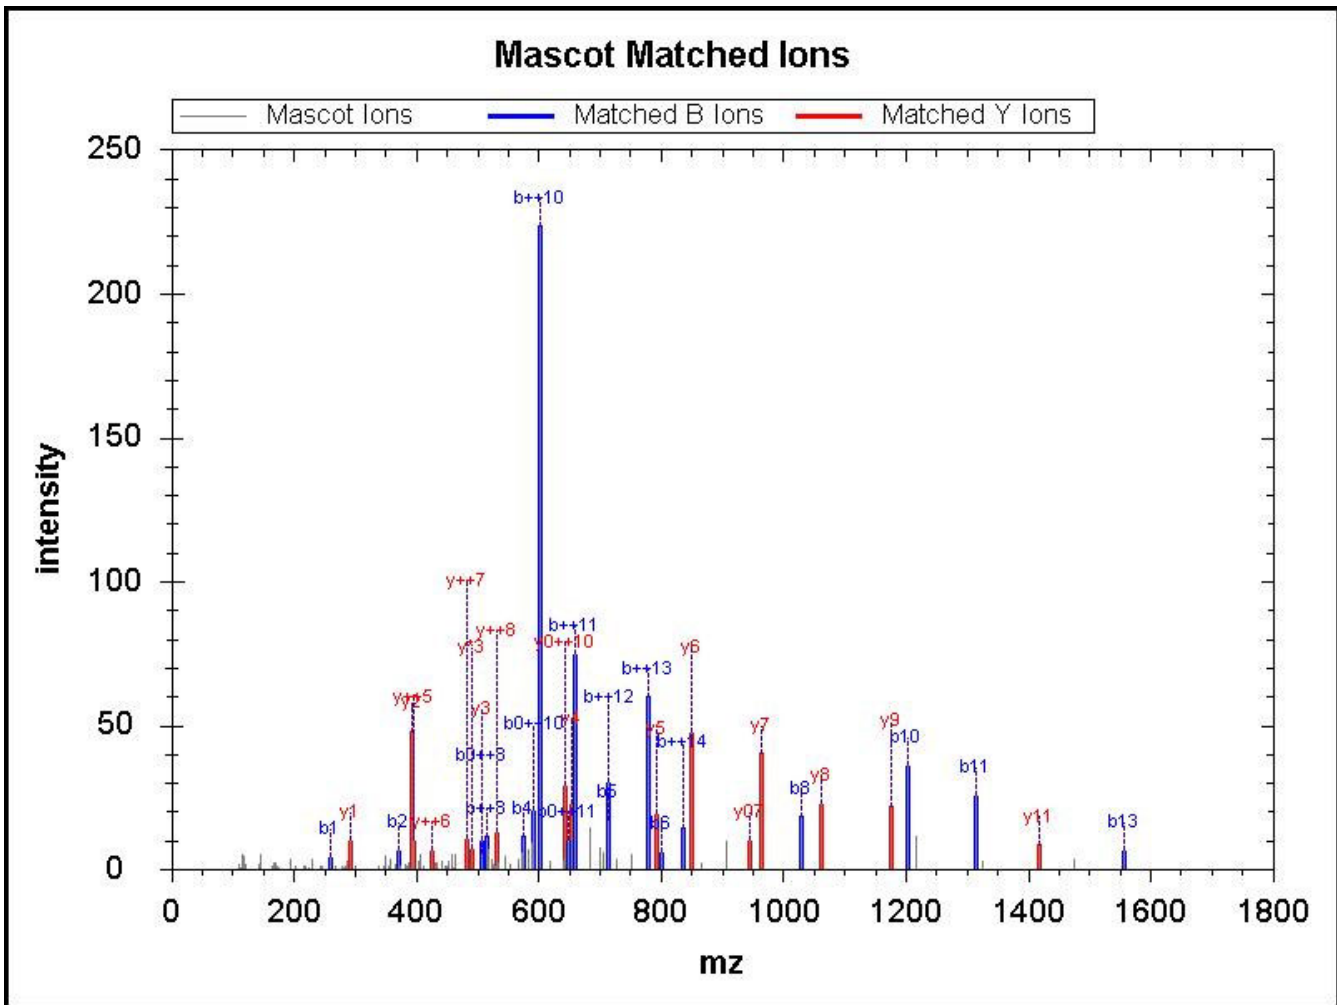

| No | b        | b++    | b0       | b0++   | Seq | y        | y++      | y*       | y*++     | y0       | y0++     | RevNo |
|----|----------|--------|----------|--------|-----|----------|----------|----------|----------|----------|----------|-------|
| 1  | 258.19   | 129.60 |          |        | L   |          |          |          |          |          |          | 22    |
| 2  | 371.28   | 186.14 |          |        | L   | 2,474.23 | 1,237.62 | 2,457.21 | 1,229.11 | 2,456.22 | 1,228.61 | 21    |
| 3  | 518.35   | 259.68 |          |        | F   | 2,361.15 | 1,181.08 | 2,344.12 | 1,172.56 | 2,343.14 | 1,172.07 | 20    |
| 4  | 575.37   | 288.19 |          |        | G   | 2,214.08 | 1,107.54 | 2,197.05 | 1,099.03 | 2,196.07 | 1,098.54 | 19    |
| 5  | 712.43   | 356.72 |          |        | H   | 2,157.06 | 1,079.03 | 2,140.03 | 1,070.52 | 2,139.05 | 1,070.03 | 18    |
| 6  | 799.46   | 400.23 | 781.45   | 391.23 | S   | 2,020.00 | 1,010.50 | 2,002.97 | 1,001.99 | 2,001.99 | 1,001.50 | 17    |
| 7  | 900.51   | 450.76 | 882.50   | 441.75 | T   | 1,932.97 | 966.99   | 1,915.94 | 958.47   | 1,914.96 | 957.98   | 16    |
| 8  | 1,029.55 | 515.28 | 1,011.54 | 506.27 | E   | 1,831.92 | 916.46   | 1,814.89 | 907.95   | 1,813.91 | 907.46   | 15    |
| 9  | 1,086.57 | 543.79 | 1,068.56 | 534.78 | G   | 1,702.88 | 851.94   | 1,685.85 | 843.43   | 1,684.87 | 842.94   | 14    |
| 10 | 1,201.60 | 601.30 | 1,183.59 | 592.30 | D   | 1,645.86 | 823.43   | 1,628.83 | 814.92   | 1,627.84 | 814.43   | 13    |
| 11 | 1,314.68 | 657.84 | 1,296.67 | 648.84 | I   | 1,530.83 | 765.92   | 1,513.80 | 757.40   | 1,512.82 | 756.91   | 12    |

|    |          |          |          |          |   |          |        |          |        |          |        |    |
|----|----------|----------|----------|----------|---|----------|--------|----------|--------|----------|--------|----|
| 12 | 1,427.77 | 714.39   | 1,409.75 | 705.38   | L | 1,417.74 | 709.38 | 1,400.72 | 700.86 | 1,399.73 | 700.37 | 11 |
| 13 | 1,556.81 | 778.91   | 1,538.80 | 769.90   | E | 1,304.66 | 652.83 | 1,287.63 | 644.32 | 1,286.65 | 643.83 | 10 |
| 14 | 1,669.89 | 835.45   | 1,651.88 | 826.44   | L | 1,175.62 | 588.31 | 1,158.59 | 579.80 | 1,157.61 | 579.31 | 9  |
| 15 | 1,768.96 | 884.98   | 1,750.95 | 875.98   | V | 1,062.53 | 531.77 | 1,045.51 | 523.26 | 1,044.52 | 522.77 | 8  |
| 16 | 1,883.99 | 942.50   | 1,865.98 | 933.49   | D | 963.47   | 482.24 | 946.44   | 473.72 | 945.45   | 473.23 | 7  |
| 17 | 1,941.01 | 971.01   | 1,923.00 | 962.00   | G | 848.44   | 424.72 | 831.41   | 416.21 | 830.43   | 415.72 | 6  |
| 18 | 2,078.07 | 1,039.54 | 2,060.06 | 1,030.53 | H | 791.42   | 396.21 | 774.39   | 387.70 | 773.41   | 387.21 | 5  |
| 19 | 2,225.14 | 1,113.07 | 2,207.13 | 1,104.07 | F | 654.36   | 327.68 | 637.33   | 319.17 | 636.35   | 318.68 | 4  |
| 20 | 2,340.16 | 1,170.59 | 2,322.15 | 1,161.58 | D | 507.29   | 254.15 | 490.26   | 245.64 | 489.28   | 245.14 | 3  |
| 21 | 2,441.21 | 1,221.11 | 2,423.20 | 1,212.10 | T | 392.26   | 196.63 | 375.24   | 188.12 | 374.25   | 187.63 | 2  |
| 22 |          |          |          |          | K | 291.21   | 146.11 | 274.19   | 137.60 |          |        | 1  |

Query 91440 Hit 1

MS/MS Fragmentation of **TKEEVAGTLEAVQTIQSITQALQK**

Found in **sp|Q0JRZ9|FCHO2\_HUMAN**, FCH domain only protein 2 OS=Homo sapiens GN=FCHO2 PE=1 SV=2

Match to Query 91440: 3017.702from(755.4329,4+)

Title: 1095: Scan 2403 (rt=63.6431, f=3, i=367) [D:\lab212\membrane\Grace\Joyce\iTRAQ\_39\_1.raw]

Data File: Submitted from 20120508-1(merge) by Mascot Daemon on JOYCE-VAIO

Monoisotopic mass of neutral peptide Mr(calc): 3017.702

Variable modifications:

K2 :iTRAQ4plex (K)

K24 :iTRAQ4plex (K)

Ions Score: 85.42 Expect: 0.000

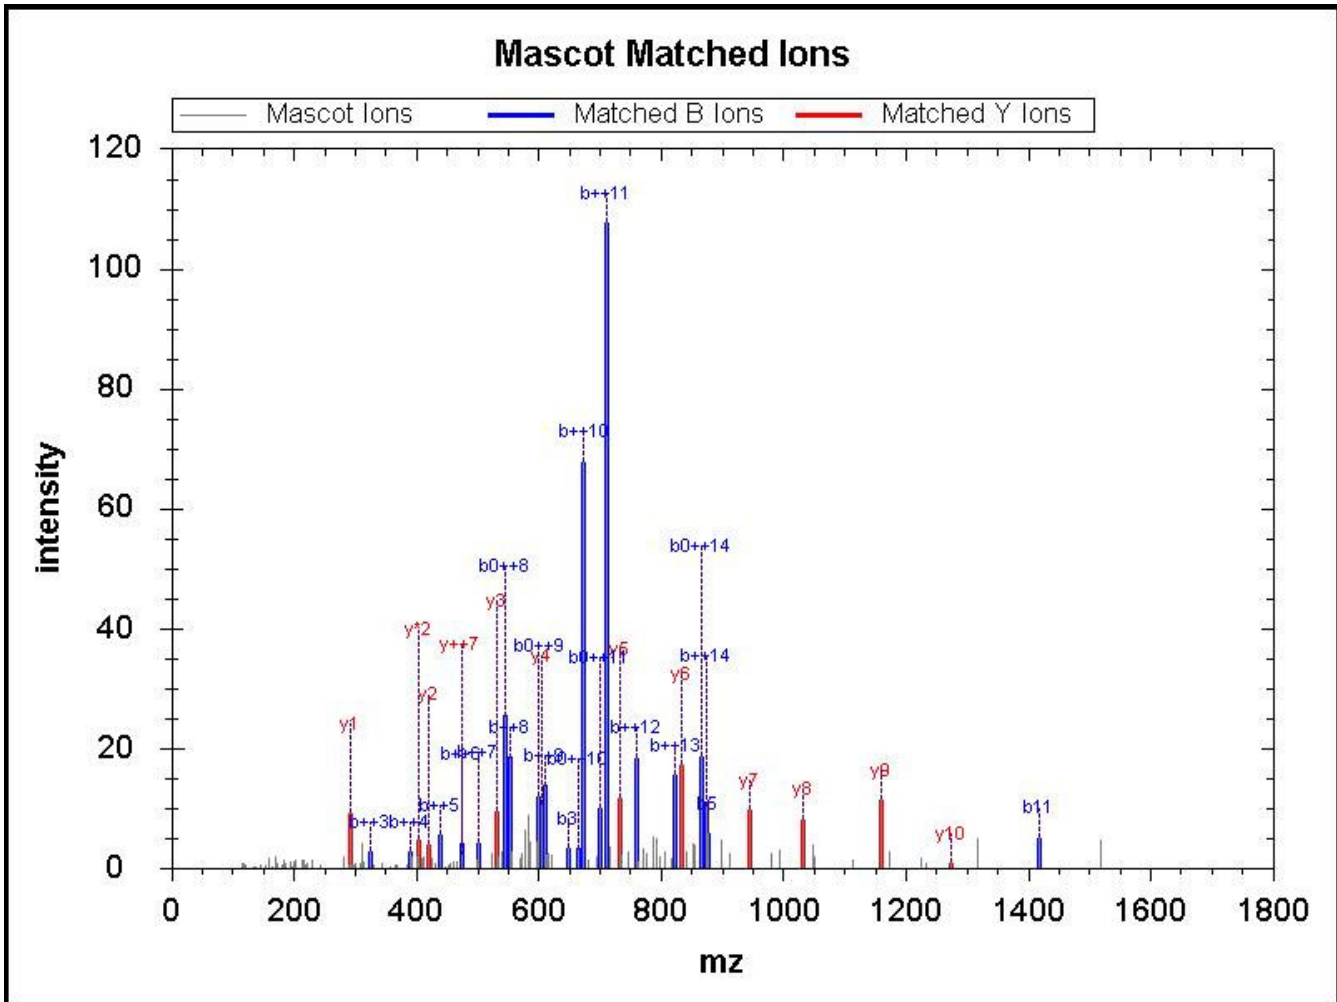

| No | b      | b++    | b*     | b*+    | b0     | b0++   | Seq | y        | y++      | y*       | y*+      | y0       | y0++     | RevNo |
|----|--------|--------|--------|--------|--------|--------|-----|----------|----------|----------|----------|----------|----------|-------|
| 1  | 246.16 | 123.58 |        |        | 228.15 | 114.58 | T   |          |          |          |          |          |          | 24    |
| 2  | 518.35 | 259.68 | 501.33 | 251.17 | 500.34 | 250.68 | K   | 2,773.55 | 1,387.28 | 2,756.53 | 1,378.77 | 2,755.54 | 1,378.28 | 23    |

|    |          |          |          |          |          |          |   |          |          |          |          |          |          |    |
|----|----------|----------|----------|----------|----------|----------|---|----------|----------|----------|----------|----------|----------|----|
| 3  | 647.40   | 324.20   | 630.37   | 315.69   | 629.39   | 315.20   | E | 2,501.36 | 1,251.18 | 2,484.33 | 1,242.67 | 2,483.35 | 1,242.18 | 22 |
| 4  | 776.44   | 388.72   | 759.41   | 380.21   | 758.43   | 379.72   | E | 2,372.32 | 1,186.66 | 2,355.29 | 1,178.15 | 2,354.30 | 1,177.66 | 21 |
| 5  | 875.51   | 438.26   | 858.48   | 429.74   | 857.50   | 429.25   | V | 2,243.27 | 1,122.14 | 2,226.25 | 1,113.63 | 2,225.26 | 1,113.13 | 20 |
| 6  | 946.54   | 473.78   | 929.52   | 465.26   | 928.53   | 464.77   | A | 2,144.20 | 1,072.61 | 2,127.18 | 1,064.09 | 2,126.19 | 1,063.60 | 19 |
| 7  | 1,003.57 | 502.29   | 986.54   | 493.77   | 985.56   | 493.28   | G | 2,073.17 | 1,037.09 | 2,056.14 | 1,028.57 | 2,055.16 | 1,028.08 | 18 |
| 8  | 1,104.61 | 552.81   | 1,087.59 | 544.30   | 1,086.60 | 543.81   | T | 2,016.15 | 1,008.58 | 1,999.12 | 1,000.06 | 1,998.14 | 999.57   | 17 |
| 9  | 1,217.70 | 609.35   | 1,200.67 | 600.84   | 1,199.69 | 600.35   | L | 1,915.10 | 958.05   | 1,898.07 | 949.54   | 1,897.09 | 949.05   | 16 |
| 10 | 1,346.74 | 673.87   | 1,329.71 | 665.36   | 1,328.73 | 664.87   | E | 1,802.01 | 901.51   | 1,784.99 | 893.00   | 1,784.00 | 892.51   | 15 |
| 11 | 1,417.78 | 709.39   | 1,400.75 | 700.88   | 1,399.77 | 700.39   | A | 1,672.97 | 836.99   | 1,655.94 | 828.48   | 1,654.96 | 827.98   | 14 |
| 12 | 1,516.85 | 758.93   | 1,499.82 | 750.41   | 1,498.84 | 749.92   | V | 1,601.93 | 801.47   | 1,584.91 | 792.96   | 1,583.92 | 792.47   | 13 |
| 13 | 1,644.90 | 822.96   | 1,627.88 | 814.44   | 1,626.89 | 813.95   | Q | 1,502.87 | 751.94   | 1,485.84 | 743.42   | 1,484.86 | 742.93   | 12 |
| 14 | 1,745.95 | 873.48   | 1,728.93 | 864.97   | 1,727.94 | 864.47   | T | 1,374.81 | 687.91   | 1,357.78 | 679.39   | 1,356.80 | 678.90   | 11 |
| 15 | 1,859.04 | 930.02   | 1,842.01 | 921.51   | 1,841.03 | 921.02   | I | 1,273.76 | 637.38   | 1,256.73 | 628.87   | 1,255.75 | 628.38   | 10 |
| 16 | 1,987.10 | 994.05   | 1,970.07 | 985.54   | 1,969.08 | 985.05   | Q | 1,160.68 | 580.84   | 1,143.65 | 572.33   | 1,142.66 | 571.84   | 9  |
| 17 | 2,074.13 | 1,037.57 | 2,057.10 | 1,029.05 | 2,056.12 | 1,028.56 | S | 1,032.62 | 516.81   | 1,015.59 | 508.30   | 1,014.61 | 507.81   | 8  |
| 18 | 2,187.21 | 1,094.11 | 2,170.18 | 1,085.60 | 2,169.20 | 1,085.10 | I | 945.58   | 473.30   | 928.56   | 464.78   | 927.57   | 464.29   | 7  |
| 19 | 2,288.26 | 1,144.63 | 2,271.23 | 1,136.12 | 2,270.25 | 1,135.63 | T | 832.50   | 416.75   | 815.47   | 408.24   | 814.49   | 407.75   | 6  |
| 20 | 2,416.32 | 1,208.66 | 2,399.29 | 1,200.15 | 2,398.31 | 1,199.66 | Q | 731.45   | 366.23   | 714.43   | 357.72   |          |          | 5  |
| 21 | 2,487.35 | 1,244.18 | 2,470.33 | 1,235.67 | 2,469.34 | 1,235.18 | A | 603.39   | 302.20   | 586.37   | 293.69   |          |          | 4  |
| 22 | 2,600.44 | 1,300.72 | 2,583.41 | 1,292.21 | 2,582.43 | 1,291.72 | L | 532.36   | 266.68   | 515.33   | 258.17   |          |          | 3  |
| 23 | 2,728.50 | 1,364.75 | 2,711.47 | 1,356.24 | 2,710.49 | 1,355.75 | Q | 419.27   | 210.14   | 402.25   | 201.63   |          |          | 2  |
| 24 |          |          |          |          |          |          | K | 291.21   | 146.11   | 274.19   | 137.60   |          |          | 1  |

Query 85432 Hit 1

MS/MS Fragmentation of **DLNLAGTAEVGLAGYFMDHTVAFR**

Found in **sp|Q9NP81|SYSM\_HUMAN**, Serine--tRNA ligase

Match to Query 85432: 2711.352from(904.7912,3+)

Title: 1080: Scan 2450 (rt=64.1411, f=3, i=362) [D:\lab212\membrane\Grace\Joyce\iTRAQ\_29\_1.raw]

Data File: Submitted from 20120508-1(merge) by Mascot Daemon on JOYCE-VAIO

Monoisotopic mass of neutral peptide Mr(calc): 2711.352

Variable modifications:

Ions Score: 85.27 Expect: 0.000

### Mascot Matched Ions

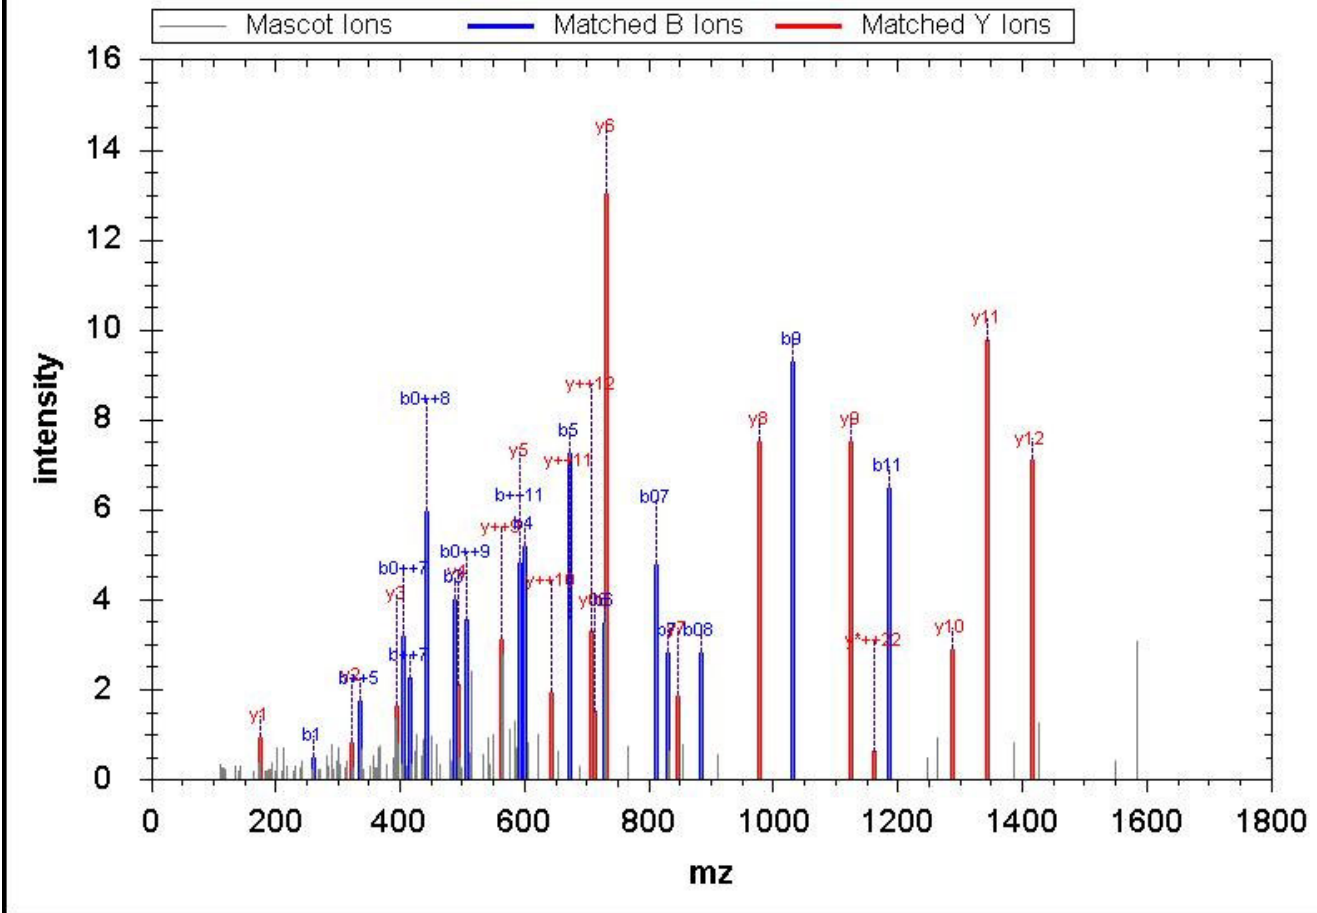

| No | b        | b++      | b*       | b*++     | b0       | b0++     | Seq | y        | y++      | y*       | y*++     | y0       | y0++     | RevNo |
|----|----------|----------|----------|----------|----------|----------|-----|----------|----------|----------|----------|----------|----------|-------|
| 1  | 260.14   | 130.57   |          |          | 242.13   | 121.57   | D   |          |          |          |          |          |          | 24    |
| 2  | 373.22   | 187.11   |          |          | 355.21   | 178.11   | L   | 2,453.23 | 1,227.12 | 2,436.20 | 1,218.60 | 2,435.22 | 1,218.11 | 23    |
| 3  | 487.26   | 244.14   | 470.24   | 235.62   | 469.25   | 235.13   | N   | 2,340.14 | 1,170.58 | 2,323.12 | 1,162.06 | 2,322.13 | 1,161.57 | 22    |
| 4  | 600.35   | 300.68   | 583.32   | 292.16   | 582.34   | 291.67   | L   | 2,226.10 | 1,113.55 | 2,209.07 | 1,105.04 | 2,208.09 | 1,104.55 | 21    |
| 5  | 671.38   | 336.20   | 654.36   | 327.68   | 653.37   | 327.19   | A   | 2,113.02 | 1,057.01 | 2,095.99 | 1,048.50 | 2,095.01 | 1,048.01 | 20    |
| 6  | 728.41   | 364.71   | 711.38   | 356.19   | 710.40   | 355.70   | G   | 2,041.98 | 1,021.49 | 2,024.95 | 1,012.98 | 2,023.97 | 1,012.49 | 19    |
| 7  | 829.45   | 415.23   | 812.43   | 406.72   | 811.44   | 406.23   | T   | 1,984.96 | 992.98   | 1,967.93 | 984.47   | 1,966.95 | 983.98   | 18    |
| 8  | 900.49   | 450.75   | 883.46   | 442.24   | 882.48   | 441.74   | A   | 1,883.91 | 942.46   | 1,866.88 | 933.95   | 1,865.90 | 933.45   | 17    |
| 9  | 1,029.53 | 515.27   | 1,012.51 | 506.76   | 1,011.52 | 506.27   | E   | 1,812.87 | 906.94   | 1,795.85 | 898.43   | 1,794.86 | 897.94   | 16    |
| 10 | 1,128.60 | 564.80   | 1,111.58 | 556.29   | 1,110.59 | 555.80   | V   | 1,683.83 | 842.42   | 1,666.80 | 833.91   | 1,665.82 | 833.41   | 15    |
| 11 | 1,185.62 | 593.32   | 1,168.60 | 584.80   | 1,167.61 | 584.31   | G   | 1,584.76 | 792.89   | 1,567.74 | 784.37   | 1,566.75 | 783.88   | 14    |
| 12 | 1,298.71 | 649.86   | 1,281.68 | 641.34   | 1,280.70 | 640.85   | L   | 1,527.74 | 764.37   | 1,510.71 | 755.86   | 1,509.73 | 755.37   | 13    |
| 13 | 1,369.74 | 685.38   | 1,352.72 | 676.86   | 1,351.73 | 676.37   | A   | 1,414.66 | 707.83   | 1,397.63 | 699.32   | 1,396.65 | 698.83   | 12    |
| 14 | 1,426.77 | 713.89   | 1,409.74 | 705.37   | 1,408.76 | 704.88   | G   | 1,343.62 | 672.31   | 1,326.59 | 663.80   | 1,325.61 | 663.31   | 11    |
| 15 | 1,589.83 | 795.42   | 1,572.80 | 786.91   | 1,571.82 | 786.41   | Y   | 1,286.60 | 643.80   | 1,269.57 | 635.29   | 1,268.59 | 634.80   | 10    |
| 16 | 1,736.90 | 868.95   | 1,719.87 | 860.44   | 1,718.89 | 859.95   | F   | 1,123.54 | 562.27   | 1,106.51 | 553.76   | 1,105.52 | 553.27   | 9     |
| 17 | 1,867.94 | 934.47   | 1,850.91 | 925.96   | 1,849.93 | 925.47   | M   | 976.47   | 488.74   | 959.44   | 480.22   | 958.46   | 479.73   | 8     |
| 18 | 1,982.97 | 991.99   | 1,965.94 | 983.47   | 1,964.95 | 982.98   | D   | 845.43   | 423.22   | 828.40   | 414.70   | 827.42   | 414.21   | 7     |
| 19 | 2,120.02 | 1,060.52 | 2,103.00 | 1,052.00 | 2,102.01 | 1,051.51 | H   | 730.40   | 365.70   | 713.37   | 357.19   | 712.39   | 356.70   | 6     |
| 20 | 2,221.07 | 1,111.04 | 2,204.05 | 1,102.53 | 2,203.06 | 1,102.03 | T   | 593.34   | 297.17   | 576.31   | 288.66   | 575.33   | 288.17   | 5     |
| 21 | 2,320.14 | 1,160.57 | 2,303.11 | 1,152.06 | 2,302.13 | 1,151.57 | V   | 492.29   | 246.65   | 475.27   | 238.14   |          |          | 4     |
| 22 | 2,391.18 | 1,196.09 | 2,374.15 | 1,187.58 | 2,373.17 | 1,187.09 | A   | 393.22   | 197.12   | 376.20   | 188.60   |          |          | 3     |
| 23 | 2,538.25 | 1,269.63 | 2,521.22 | 1,261.11 | 2,520.24 | 1,260.62 | F   | 322.19   | 161.60   | 305.16   | 153.08   |          |          | 2     |

|    |  |  |  |  |   |        |       |        |       |  |  |  |  |   |
|----|--|--|--|--|---|--------|-------|--------|-------|--|--|--|--|---|
| 24 |  |  |  |  | R | 175.12 | 88.06 | 158.09 | 79.55 |  |  |  |  | 1 |
|----|--|--|--|--|---|--------|-------|--------|-------|--|--|--|--|---|

Query 90123 Hit 1

MS/MS Fragmentation of **EVTSHFQVTLNDIQLQMEQHNER**

Found in **sp|P40222|TXLNA\_HUMAN**, Alpha-taxilin OS=Homo sapiens GN=TXLNA PE=1 SV=3

Match to Query 90123: 2939.437from(735.8665,4+)

Title: 743: Scan 1669 (rt=47.1845, f=2, i=270) [D:\lab212\membrane\Grace\Joyce\iTRAQ\_44\_1.raw]

Data File: Submitted from 20120508-1(merge) by Mascot Daemon on JOYCE-VAIO

Monoisotopic mass of neutral peptide Mr(calc): 2939.437

Variable modifications:

Ions Score: 85.16 Expect: 0.000

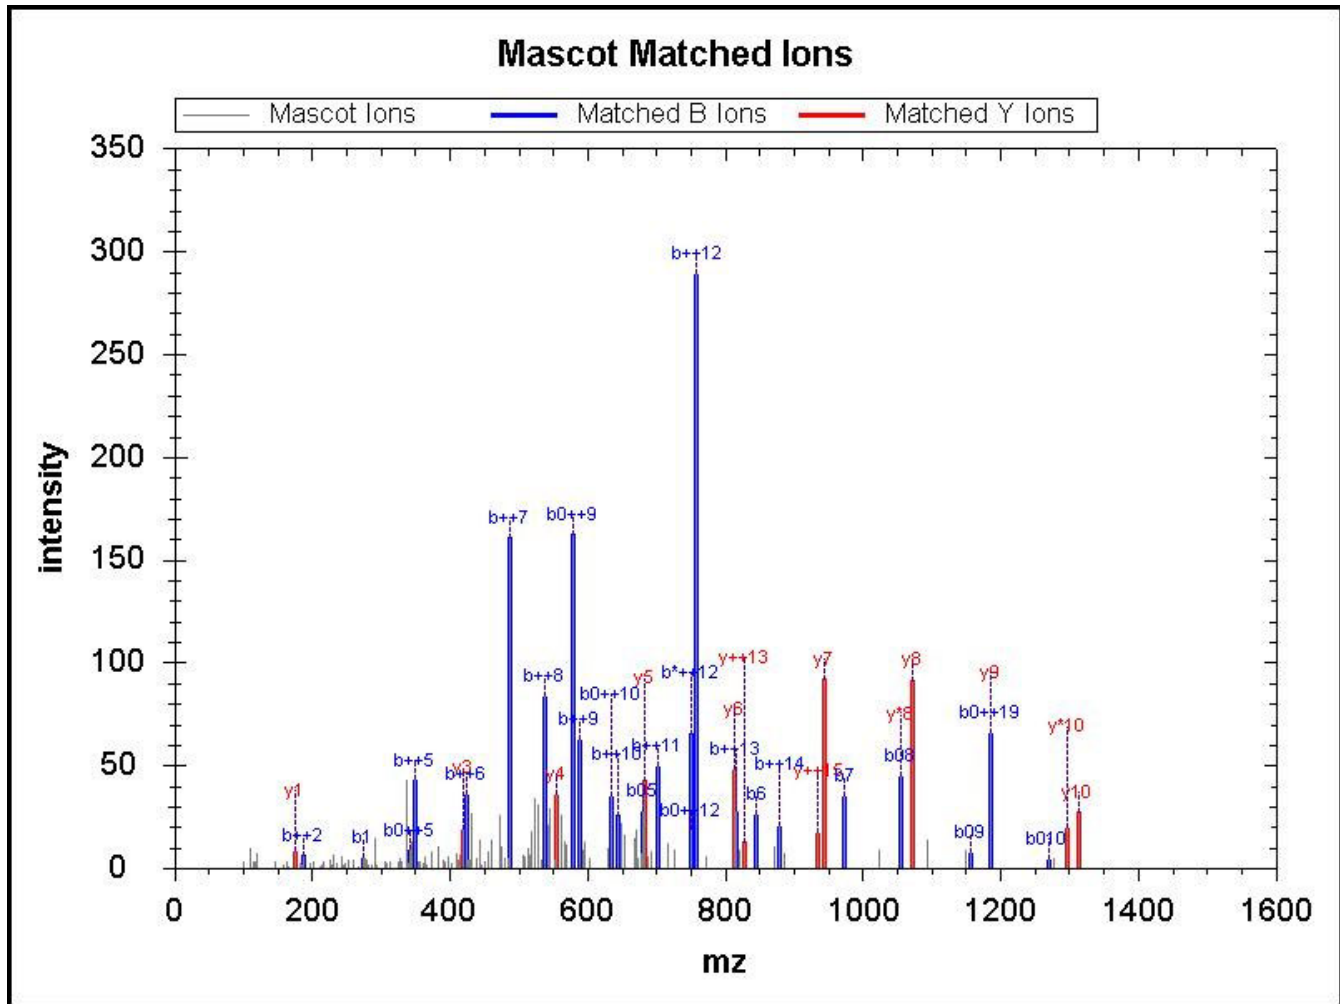

| No | b        | b++    | b*       | b*++   | b0       | b0++   | Seq | y        | y++      | y*       | y*++     | y0       | y0++     | RevNo |
|----|----------|--------|----------|--------|----------|--------|-----|----------|----------|----------|----------|----------|----------|-------|
| 1  | 274.15   | 137.58 |          |        | 256.14   | 128.57 | E   |          |          |          |          |          |          | 23    |
| 2  | 373.22   | 187.11 |          |        | 355.21   | 178.11 | V   | 2,667.29 | 1,334.15 | 2,650.27 | 1,325.64 | 2,649.28 | 1,325.15 | 22    |
| 3  | 474.27   | 237.64 |          |        | 456.26   | 228.63 | T   | 2,568.23 | 1,284.62 | 2,551.20 | 1,276.10 | 2,550.22 | 1,275.61 | 21    |
| 4  | 561.30   | 281.15 |          |        | 543.29   | 272.15 | S   | 2,467.18 | 1,234.09 | 2,450.15 | 1,225.58 | 2,449.17 | 1,225.09 | 20    |
| 5  | 698.36   | 349.68 |          |        | 680.35   | 340.68 | H   | 2,380.15 | 1,190.58 | 2,363.12 | 1,182.06 | 2,362.14 | 1,181.57 | 19    |
| 6  | 845.43   | 423.22 |          |        | 827.42   | 414.21 | F   | 2,243.09 | 1,122.05 | 2,226.06 | 1,113.53 | 2,225.08 | 1,113.04 | 18    |
| 7  | 973.49   | 487.25 | 956.46   | 478.73 | 955.48   | 478.24 | Q   | 2,096.02 | 1,048.51 | 2,078.99 | 1,040.00 | 2,078.01 | 1,039.51 | 17    |
| 8  | 1,072.55 | 536.78 | 1,055.53 | 528.27 | 1,054.54 | 527.78 | V   | 1,967.96 | 984.48   | 1,950.93 | 975.97   | 1,949.95 | 975.48   | 16    |
| 9  | 1,173.60 | 587.30 | 1,156.58 | 578.79 | 1,155.59 | 578.30 | T   | 1,868.89 | 934.95   | 1,851.87 | 926.44   | 1,850.88 | 925.94   | 15    |
| 10 | 1,286.69 | 643.85 | 1,269.66 | 635.33 | 1,268.68 | 634.84 | L   | 1,767.84 | 884.43   | 1,750.82 | 875.91   | 1,749.83 | 875.42   | 14    |
| 11 | 1,400.73 | 700.87 | 1,383.70 | 692.36 | 1,382.72 | 691.86 | N   | 1,654.76 | 827.88   | 1,637.73 | 819.37   | 1,636.75 | 818.88   | 13    |
| 12 | 1,515.76 | 758.38 | 1,498.73 | 749.87 | 1,497.75 | 749.38 | D   | 1,540.72 | 770.86   | 1,523.69 | 762.35   | 1,522.71 | 761.86   | 12    |
| 13 | 1,628.84 | 814.92 | 1,611.81 | 806.41 | 1,610.83 | 805.92 | I   | 1,425.69 | 713.35   | 1,408.66 | 704.84   | 1,407.68 | 704.34   | 11    |

|    |          |          |          |          |          |          |   |          |        |          |        |          |        |    |
|----|----------|----------|----------|----------|----------|----------|---|----------|--------|----------|--------|----------|--------|----|
| 14 | 1,756.90 | 878.95   | 1,739.87 | 870.44   | 1,738.89 | 869.95   | Q | 1,312.61 | 656.81 | 1,295.58 | 648.29 | 1,294.60 | 647.80 | 10 |
| 15 | 1,869.98 | 935.50   | 1,852.96 | 926.98   | 1,851.97 | 926.49   | L | 1,184.55 | 592.78 | 1,167.52 | 584.26 | 1,166.54 | 583.77 | 9  |
| 16 | 1,998.04 | 999.52   | 1,981.02 | 991.01   | 1,980.03 | 990.52   | Q | 1,071.46 | 536.24 | 1,054.44 | 527.72 | 1,053.45 | 527.23 | 8  |
| 17 | 2,129.08 | 1,065.04 | 2,112.06 | 1,056.53 | 2,111.07 | 1,056.04 | M | 943.41   | 472.21 | 926.38   | 463.69 | 925.39   | 463.20 | 7  |
| 18 | 2,258.12 | 1,129.57 | 2,241.10 | 1,121.05 | 2,240.11 | 1,120.56 | E | 812.36   | 406.69 | 795.34   | 398.17 | 794.35   | 397.68 | 6  |
| 19 | 2,386.18 | 1,193.60 | 2,369.16 | 1,185.08 | 2,368.17 | 1,184.59 | Q | 683.32   | 342.16 | 666.30   | 333.65 | 665.31   | 333.16 | 5  |
| 20 | 2,523.24 | 1,262.12 | 2,506.22 | 1,253.61 | 2,505.23 | 1,253.12 | H | 555.26   | 278.14 | 538.24   | 269.62 | 537.25   | 269.13 | 4  |
| 21 | 2,637.28 | 1,319.15 | 2,620.26 | 1,310.63 | 2,619.27 | 1,310.14 | N | 418.20   | 209.61 | 401.18   | 201.09 | 400.19   | 200.60 | 3  |
| 22 | 2,766.33 | 1,383.67 | 2,749.30 | 1,375.15 | 2,748.32 | 1,374.66 | E | 304.16   | 152.58 | 287.13   | 144.07 | 286.15   | 143.58 | 2  |
| 23 |          |          |          |          |          |          | R | 175.12   | 88.06  | 158.09   | 79.55  |          |        | 1  |

Query 58674 Hit 1

MS/MS Fragmentation of **QGTFHSQQALEYGTK**

Found in **sp|P53597|SUCA\_HUMAN**, Succinyl-CoA ligase [ADP/GDP-forming] subunit alpha

Match to Query 58674: 1982.015from(661.6788,3+)

Title: 54: Scan 848 (rt=26.1519, f=2, i=125) [D:\lab212\membrane\GraceJoyce\iTRAQ\_43\_2.raw]

Data File: Submitted from 20120508-1(merge) by Mascot Daemon on JOYCE-VAIO

Monoisotopic mass of neutral peptide Mr(calc): 1982.015

Variable modifications:

K15 iTRAQ4plex (K)

Ions Score: 83.82 Expect: 0.000

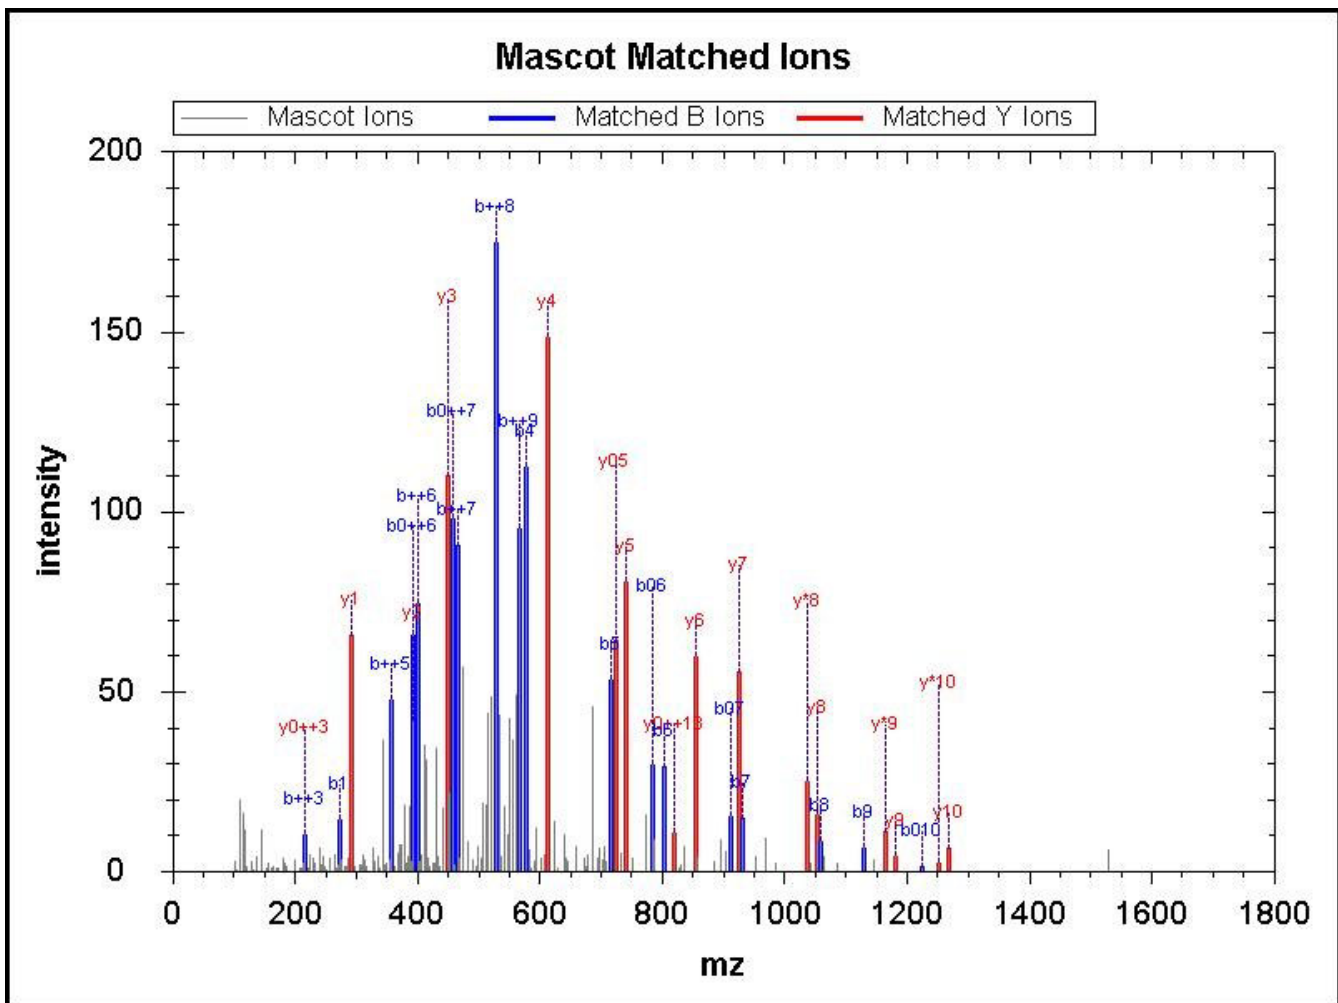

| No | b      | b++    | b*     | b*++   | b0     | b0++   | Seq | y        | y++    | y*       | y*++   | y0       | y0++   | RevNo |
|----|--------|--------|--------|--------|--------|--------|-----|----------|--------|----------|--------|----------|--------|-------|
| 1  | 273.17 | 137.09 | 256.14 | 128.57 |        |        | Q   |          |        |          |        |          |        | 15    |
| 2  | 330.19 | 165.60 | 313.16 | 157.09 |        |        | G   | 1,710.86 | 855.93 | 1,693.83 | 847.42 | 1,692.85 | 846.93 | 14    |
| 3  | 431.24 | 216.12 | 414.21 | 207.61 | 413.23 | 207.12 | T   | 1,653.84 | 827.42 | 1,636.81 | 818.91 | 1,635.82 | 818.42 | 13    |
| 4  | 578.31 | 289.66 | 561.28 | 281.14 | 560.29 | 280.65 | F   | 1,552.79 | 776.90 | 1,535.76 | 768.38 | 1,534.78 | 767.89 | 12    |



|    |          |        |          |        |          |        |   |          |        |          |        |          |        |    |
|----|----------|--------|----------|--------|----------|--------|---|----------|--------|----------|--------|----------|--------|----|
| 5  | 715.36   | 358.19 | 698.34   | 349.67 | 697.35   | 349.18 | H | 1,405.72 | 703.36 | 1,388.69 | 694.85 | 1,387.71 | 694.36 | 11 |
| 6  | 802.40   | 401.70 | 785.37   | 393.19 | 784.39   | 392.70 | S | 1,268.66 | 634.83 | 1,251.63 | 626.32 | 1,250.65 | 625.83 | 10 |
| 7  | 930.46   | 465.73 | 913.43   | 457.22 | 912.44   | 456.73 | Q | 1,181.63 | 591.32 | 1,164.60 | 582.80 | 1,163.62 | 582.31 | 9  |
| 8  | 1,058.51 | 529.76 | 1,041.49 | 521.25 | 1,040.50 | 520.76 | Q | 1,053.57 | 527.29 | 1,036.54 | 518.78 | 1,035.56 | 518.28 | 8  |
| 9  | 1,129.55 | 565.28 | 1,112.52 | 556.77 | 1,111.54 | 556.27 | A | 925.51   | 463.26 | 908.48   | 454.75 | 907.50   | 454.25 | 7  |
| 10 | 1,242.63 | 621.82 | 1,225.61 | 613.31 | 1,224.62 | 612.82 | L | 854.47   | 427.74 | 837.45   | 419.23 | 836.46   | 418.74 | 6  |
| 11 | 1,371.68 | 686.34 | 1,354.65 | 677.83 | 1,353.67 | 677.34 | E | 741.39   | 371.20 | 724.36   | 362.69 | 723.38   | 362.19 | 5  |
| 12 | 1,534.74 | 767.87 | 1,517.71 | 759.36 | 1,516.73 | 758.87 | Y | 612.35   | 306.68 | 595.32   | 298.16 | 594.34   | 297.67 | 4  |
| 13 | 1,591.76 | 796.38 | 1,574.74 | 787.87 | 1,573.75 | 787.38 | G | 449.28   | 225.15 | 432.26   | 216.63 | 431.27   | 216.14 | 3  |
| 14 | 1,692.81 | 846.91 | 1,675.78 | 838.40 | 1,674.80 | 837.90 | T | 392.26   | 196.63 | 375.24   | 188.12 | 374.25   | 187.63 | 2  |
| 15 |          |        |          |        |          |        | K | 291.21   | 146.11 | 274.19   | 137.60 |          |        | 1  |

Query 87723 Hit 1

MS/MS Fragmentation of **IFHDLDMMLTTVQEENEPVIYNR**

Found in **sp|P83111|LACTB\_HUMAN**, Serine beta-lactamase-like protein LACTB

Match to Query 87723: 2819.386from(940.8027,3+)

Title: 886: Sum of 2 scans in range 1927 (rt=53.0853, f=4, i=595) to 1928 (rt=53.1107, f=4, i=596)

[D:\lab212\membrane\GraceJoyce\iTRAQ\_33\_2.raw]

Data File: Submitted from 20120508-1(merge) by Mascot Daemon on JOYCE-VAIO

Monoisotopic mass of neutral peptide Mr(calc): 2819.386

Variable modifications:

Ions Score: 83.6 Expect: 0.000

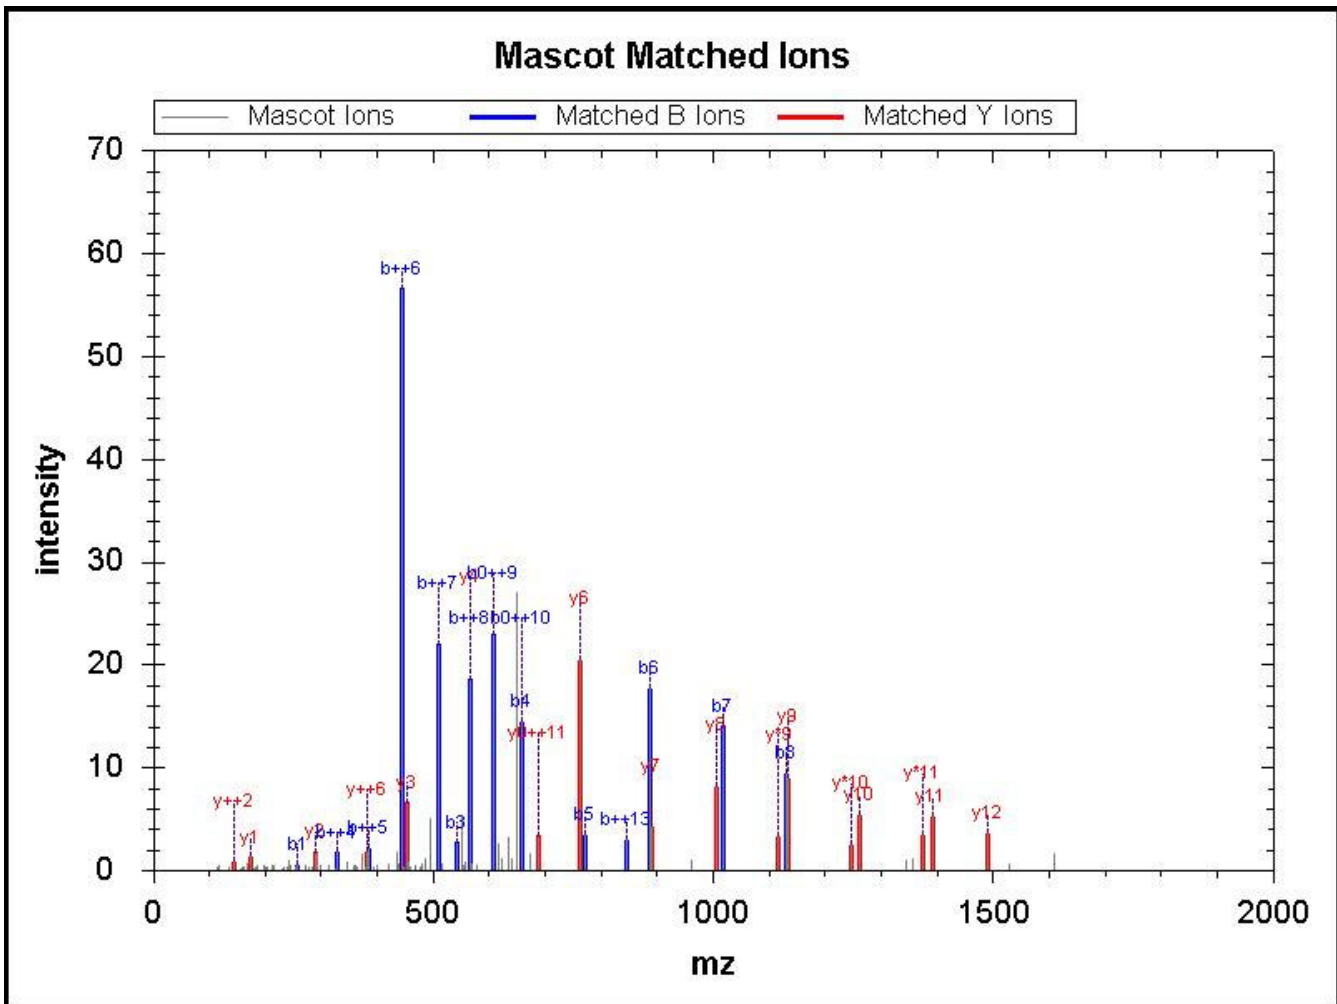

| No | b      | b++    | b* | b*+ | b0 | b0++ | Seq | y        | y++      | y*       | y*+      | y0       | y0++     | RevNo |
|----|--------|--------|----|-----|----|------|-----|----------|----------|----------|----------|----------|----------|-------|
| 1  | 258.19 | 129.60 |    |     |    |      | I   |          |          |          |          |          |          | 22    |
| 2  | 405.26 | 203.13 |    |     |    |      | F   | 2,563.21 | 1,282.11 | 2,546.19 | 1,273.60 | 2,545.20 | 1,273.10 | 21    |

|    |          |          |          |          |          |          |   |          |          |          |          |          |          |    |
|----|----------|----------|----------|----------|----------|----------|---|----------|----------|----------|----------|----------|----------|----|
| 3  | 542.32   | 271.66   |          |          |          |          | H | 2,416.14 | 1,208.58 | 2,399.12 | 1,200.06 | 2,398.13 | 1,199.57 | 20 |
| 4  | 657.35   | 329.18   |          |          | 639.34   | 320.17   | D | 2,279.09 | 1,140.05 | 2,262.06 | 1,131.53 | 2,261.08 | 1,131.04 | 19 |
| 5  | 770.43   | 385.72   |          |          | 752.42   | 376.71   | L | 2,164.06 | 1,082.53 | 2,147.03 | 1,074.02 | 2,146.05 | 1,073.53 | 18 |
| 6  | 885.46   | 443.23   |          |          | 867.45   | 434.23   | D | 2,050.98 | 1,025.99 | 2,033.95 | 1,017.48 | 2,032.96 | 1,016.99 | 17 |
| 7  | 1,016.50 | 508.75   |          |          | 998.49   | 499.75   | M | 1,935.95 | 968.48   | 1,918.92 | 959.96   | 1,917.94 | 959.47   | 16 |
| 8  | 1,129.58 | 565.30   |          |          | 1,111.57 | 556.29   | L | 1,804.91 | 902.96   | 1,787.88 | 894.44   | 1,786.90 | 893.95   | 15 |
| 9  | 1,230.63 | 615.82   |          |          | 1,212.62 | 606.81   | T | 1,691.82 | 846.42   | 1,674.80 | 837.90   | 1,673.81 | 837.41   | 14 |
| 10 | 1,331.68 | 666.34   |          |          | 1,313.67 | 657.34   | T | 1,590.78 | 795.89   | 1,573.75 | 787.38   | 1,572.77 | 786.89   | 13 |
| 11 | 1,430.75 | 715.88   |          |          | 1,412.74 | 706.87   | V | 1,489.73 | 745.37   | 1,472.70 | 736.85   | 1,471.72 | 736.36   | 12 |
| 12 | 1,558.81 | 779.91   | 1,541.78 | 771.39   | 1,540.80 | 770.90   | Q | 1,390.66 | 695.83   | 1,373.63 | 687.32   | 1,372.65 | 686.83   | 11 |
| 13 | 1,687.85 | 844.43   | 1,670.82 | 835.91   | 1,669.84 | 835.42   | E | 1,262.60 | 631.80   | 1,245.57 | 623.29   | 1,244.59 | 622.80   | 10 |
| 14 | 1,816.89 | 908.95   | 1,799.86 | 900.44   | 1,798.88 | 899.94   | E | 1,133.56 | 567.28   | 1,116.53 | 558.77   | 1,115.55 | 558.28   | 9  |
| 15 | 1,930.93 | 965.97   | 1,913.91 | 957.46   | 1,912.92 | 956.97   | N | 1,004.52 | 502.76   | 987.49   | 494.25   | 986.51   | 493.76   | 8  |
| 16 | 2,059.98 | 1,030.49 | 2,042.95 | 1,021.98 | 2,041.97 | 1,021.49 | E | 890.47   | 445.74   | 873.45   | 437.23   | 872.46   | 436.73   | 7  |
| 17 | 2,157.03 | 1,079.02 | 2,140.00 | 1,070.50 | 2,139.02 | 1,070.01 | P | 761.43   | 381.22   | 744.40   | 372.71   |          |          | 6  |
| 18 | 2,256.10 | 1,128.55 | 2,239.07 | 1,120.04 | 2,238.09 | 1,119.55 | V | 664.38   | 332.69   | 647.35   | 324.18   |          |          | 5  |
| 19 | 2,369.18 | 1,185.09 | 2,352.15 | 1,176.58 | 2,351.17 | 1,176.09 | I | 565.31   | 283.16   | 548.28   | 274.64   |          |          | 4  |
| 20 | 2,532.24 | 1,266.63 | 2,515.22 | 1,258.11 | 2,514.23 | 1,257.62 | Y | 452.23   | 226.62   | 435.20   | 218.10   |          |          | 3  |
| 21 | 2,646.29 | 1,323.65 | 2,629.26 | 1,315.13 | 2,628.28 | 1,314.64 | N | 289.16   | 145.08   | 272.14   | 136.57   |          |          | 2  |
| 22 |          |          |          |          |          |          | R | 175.12   | 88.06    | 158.09   | 79.55    |          |          | 1  |

Query 47910 Hit 1

MS/MS Fragmentation of **HTLADNFPVSEER**

Found in **sp|P20645|MPRD\_HUMAN**, Cation-dependent mannose-6-phosphate receptor OS=Homo sapiens GN=M6PR PE=1 SV=1

Match to Query 47910: 1771.863from(591.6283,3+)

Title: 423: Scan 1002 (rt=32.0729, f=3, i=141) [D:\lab212\membrane\Grace\Joyce\iTRAQ\_39\_1.raw]

Data File: Submitted from 20120508-1(merge) by Mascot Daemon on JOYCE-VAIO

Monoisotopic mass of neutral peptide Mr(calc): 1771.863

Variable modifications:

Ions Score: 83.43 Expect: 0.000

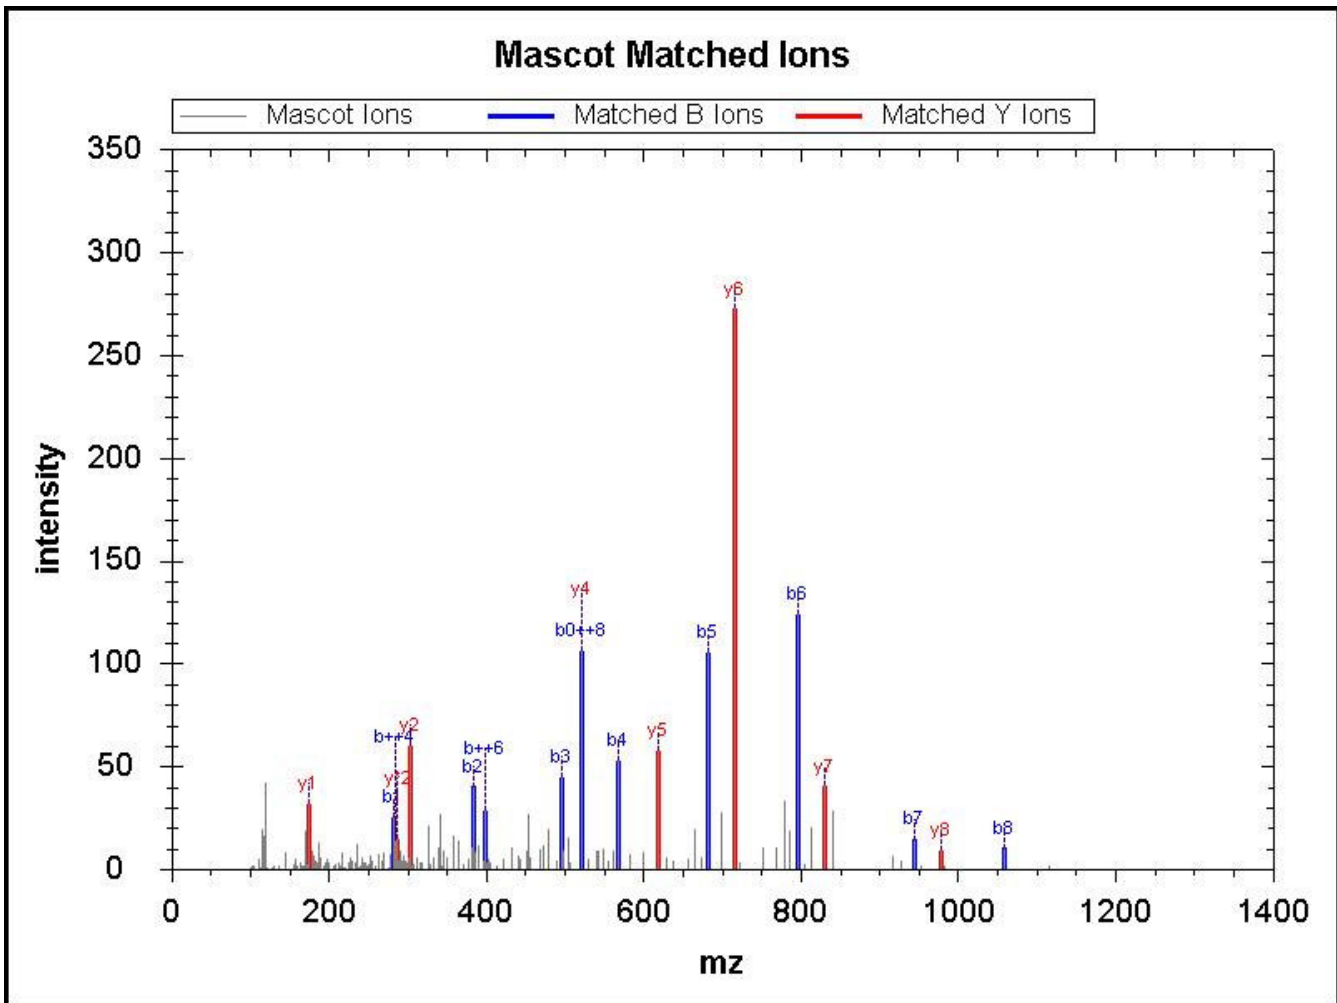

| No | b        | b++    | b*       | b*++   | b0       | b0++   | Seq | y        | y++    | y*       | y*++   | y0       | y0++   | RevNo |
|----|----------|--------|----------|--------|----------|--------|-----|----------|--------|----------|--------|----------|--------|-------|
| 1  | 282.17   | 141.59 |          |        |          |        | H   |          |        |          |        |          |        | 14    |
| 2  | 383.22   | 192.11 |          |        | 365.21   | 183.11 | T   | 1,491.71 | 746.36 | 1,474.68 | 737.84 | 1,473.70 | 737.35 | 13    |
| 3  | 496.30   | 248.65 |          |        | 478.29   | 239.65 | L   | 1,390.66 | 695.83 | 1,373.63 | 687.32 | 1,372.65 | 686.83 | 12    |
| 4  | 567.34   | 284.17 |          |        | 549.33   | 275.17 | A   | 1,277.58 | 639.29 | 1,260.55 | 630.78 | 1,259.57 | 630.29 | 11    |
| 5  | 682.36   | 341.69 |          |        | 664.35   | 332.68 | D   | 1,206.54 | 603.77 | 1,189.51 | 595.26 | 1,188.53 | 594.77 | 10    |
| 6  | 796.41   | 398.71 | 779.38   | 390.19 | 778.40   | 389.70 | N   | 1,091.51 | 546.26 | 1,074.49 | 537.75 | 1,073.50 | 537.25 | 9     |
| 7  | 943.48   | 472.24 | 926.45   | 463.73 | 925.46   | 463.24 | F   | 977.47   | 489.24 | 960.44   | 480.72 | 959.46   | 480.23 | 8     |
| 8  | 1,057.52 | 529.26 | 1,040.49 | 520.75 | 1,039.51 | 520.26 | N   | 830.40   | 415.70 | 813.37   | 407.19 | 812.39   | 406.70 | 7     |
| 9  | 1,154.57 | 577.79 | 1,137.54 | 569.28 | 1,136.56 | 568.78 | P   | 716.36   | 358.68 | 699.33   | 350.17 | 698.35   | 349.68 | 6     |
| 10 | 1,253.64 | 627.32 | 1,236.61 | 618.81 | 1,235.63 | 618.32 | V   | 619.30   | 310.16 | 602.28   | 301.64 | 601.29   | 301.15 | 5     |
| 11 | 1,340.67 | 670.84 | 1,323.64 | 662.33 | 1,322.66 | 661.83 | S   | 520.24   | 260.62 | 503.21   | 252.11 | 502.23   | 251.62 | 4     |
| 12 | 1,469.71 | 735.36 | 1,452.69 | 726.85 | 1,451.70 | 726.36 | E   | 433.20   | 217.11 | 416.18   | 208.59 | 415.19   | 208.10 | 3     |
| 13 | 1,598.76 | 799.88 | 1,581.73 | 791.37 | 1,580.75 | 790.88 | E   | 304.16   | 152.58 | 287.13   | 144.07 | 286.15   | 143.58 | 2     |
| 14 |          |        |          |        |          |        | R   | 175.12   | 88.06  | 158.09   | 79.55  |          |        | 1     |

Query 36661 Hit 1

MS/MS Fragmentation of **VAELVHFLLLK**

Found in **sp|P43357|MAGA3\_HUMAN**, Melanoma-associated antigen 3 OS=Homo sapiens GN=MAGEA3 PE=1 SV=1

Match to Query 36661: 1568.99from(785.5024,2+)

Title: 1111: Sum of 2 scans in range 2384 (rt=63.4657, f=4, i=749) to 2385 (rt=63.4911, f=4, i=750)

[D:\lab212\membrane\GraceJoyce\iTRAQ40.raw]

Data File: Submitted from 20120508-1(merge) by Mascot Daemon on JOYCE-VAIO

Monoisotopic mass of neutral peptide Mr(calc): 1568.99

Variable modifications:

K11 iTRAQ4plex (K)

Ions Score: 83.27 Expect: 0.000

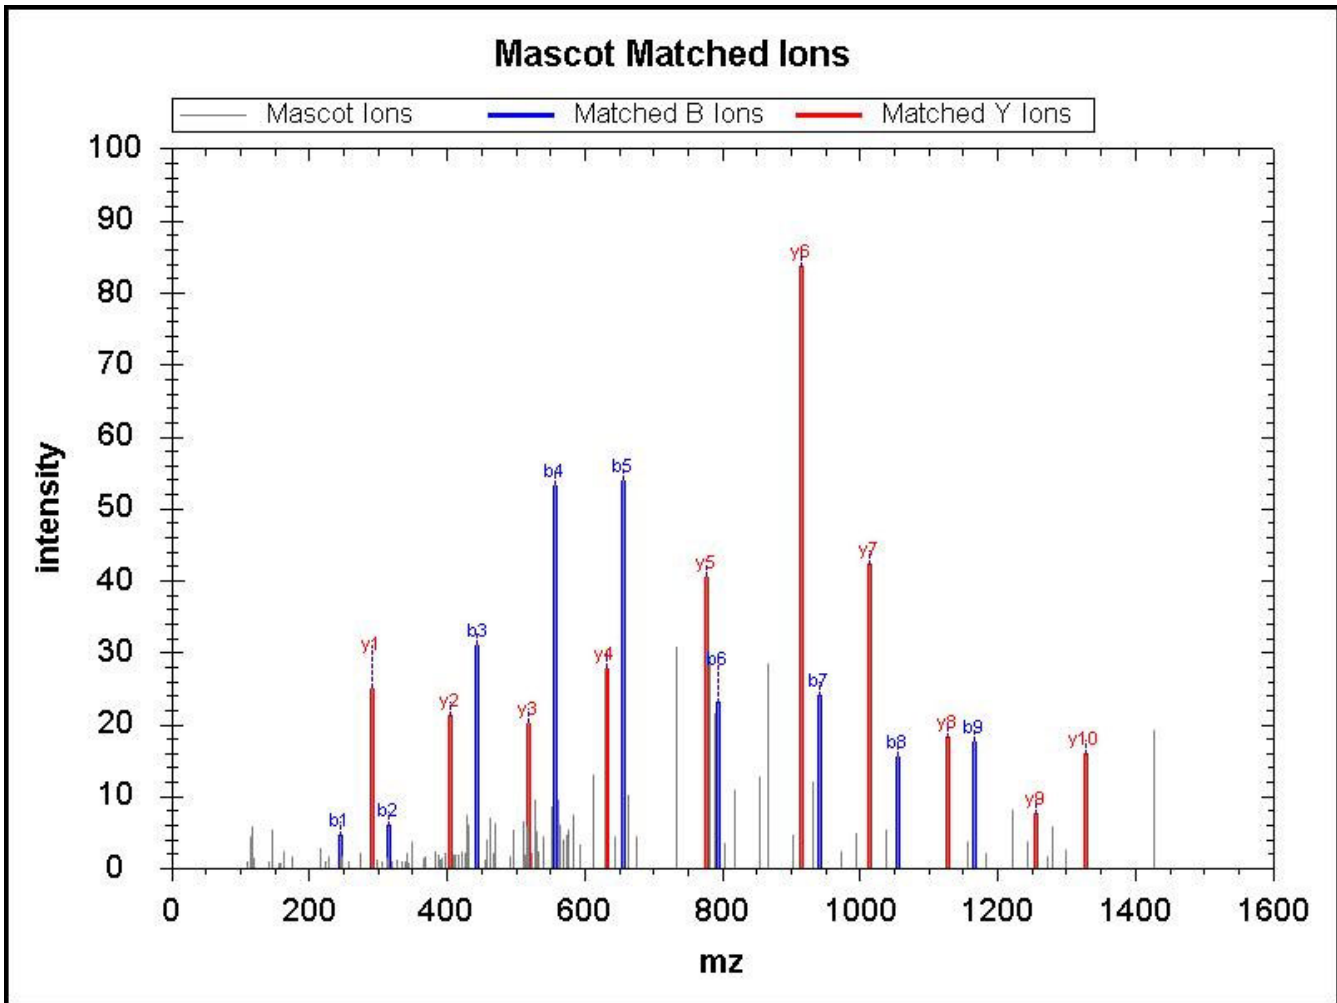

| No | b        | b++    | b0       | b0++   | Seq | y        | y++    | y*       | y*++   | y0       | y0++   | RevNo |
|----|----------|--------|----------|--------|-----|----------|--------|----------|--------|----------|--------|-------|
| 1  | 244.18   | 122.59 |          |        | V   |          |        |          |        |          |        | 11    |
| 2  | 315.21   | 158.11 |          |        | A   | 1,326.83 | 663.92 | 1,309.80 | 655.40 | 1,308.82 | 654.91 | 10    |
| 3  | 444.26   | 222.63 | 426.25   | 213.63 | E   | 1,255.79 | 628.40 | 1,238.76 | 619.89 | 1,237.78 | 619.39 | 9     |
| 4  | 557.34   | 279.17 | 539.33   | 270.17 | L   | 1,126.75 | 563.88 | 1,109.72 | 555.36 |          |        | 8     |
| 5  | 656.41   | 328.71 | 638.40   | 319.70 | V   | 1,013.66 | 507.33 | 996.64   | 498.82 |          |        | 7     |
| 6  | 793.47   | 397.24 | 775.46   | 388.23 | H   | 914.59   | 457.80 | 897.57   | 449.29 |          |        | 6     |
| 7  | 940.54   | 470.77 | 922.53   | 461.77 | F   | 777.54   | 389.27 | 760.51   | 380.76 |          |        | 5     |
| 8  | 1,053.62 | 527.31 | 1,035.61 | 518.31 | L   | 630.47   | 315.74 | 613.44   | 307.22 |          |        | 4     |
| 9  | 1,166.71 | 583.86 | 1,148.69 | 574.85 | L   | 517.38   | 259.20 | 500.36   | 250.68 |          |        | 3     |
| 10 | 1,279.79 | 640.40 | 1,261.78 | 631.39 | L   | 404.30   | 202.65 | 387.27   | 194.14 |          |        | 2     |
| 11 |          |        |          |        | K   | 291.21   | 146.11 | 274.19   | 137.60 |          |        | 1     |

Query 61915 Hit 1

MS/MS Fragmentation of **DKPVVLQFMDWILR**

Found in **sp|Q8VHL0|UT1\_MOUSE**, Urea transporter 1 OS=Mus musculus GN=Slc14a1 PE=1 SV=2

Match to Query 61915: 2047.158from(683.3932,3+)

Title: 1310: Sum of 2 scans in range 3070 (rt=77.8649, f=2, i=528) to 3071 (rt=77.8903, f=2, i=529)

[D:\lab212\membrane\GraceJoyce\iTRAQ\_39\_1.raw]

Data File:Submitted from 20120508-1(merge) by Mascot Daemon on JOYCE-VAIO

Monoisotopic mass of neutral peptide Mr(calc): 2047.158

Variable modifications:

K2 iTRAQ4plex (K)

Ions Score: 82.55 Expect: 0.000

### Mascot Matched Ions

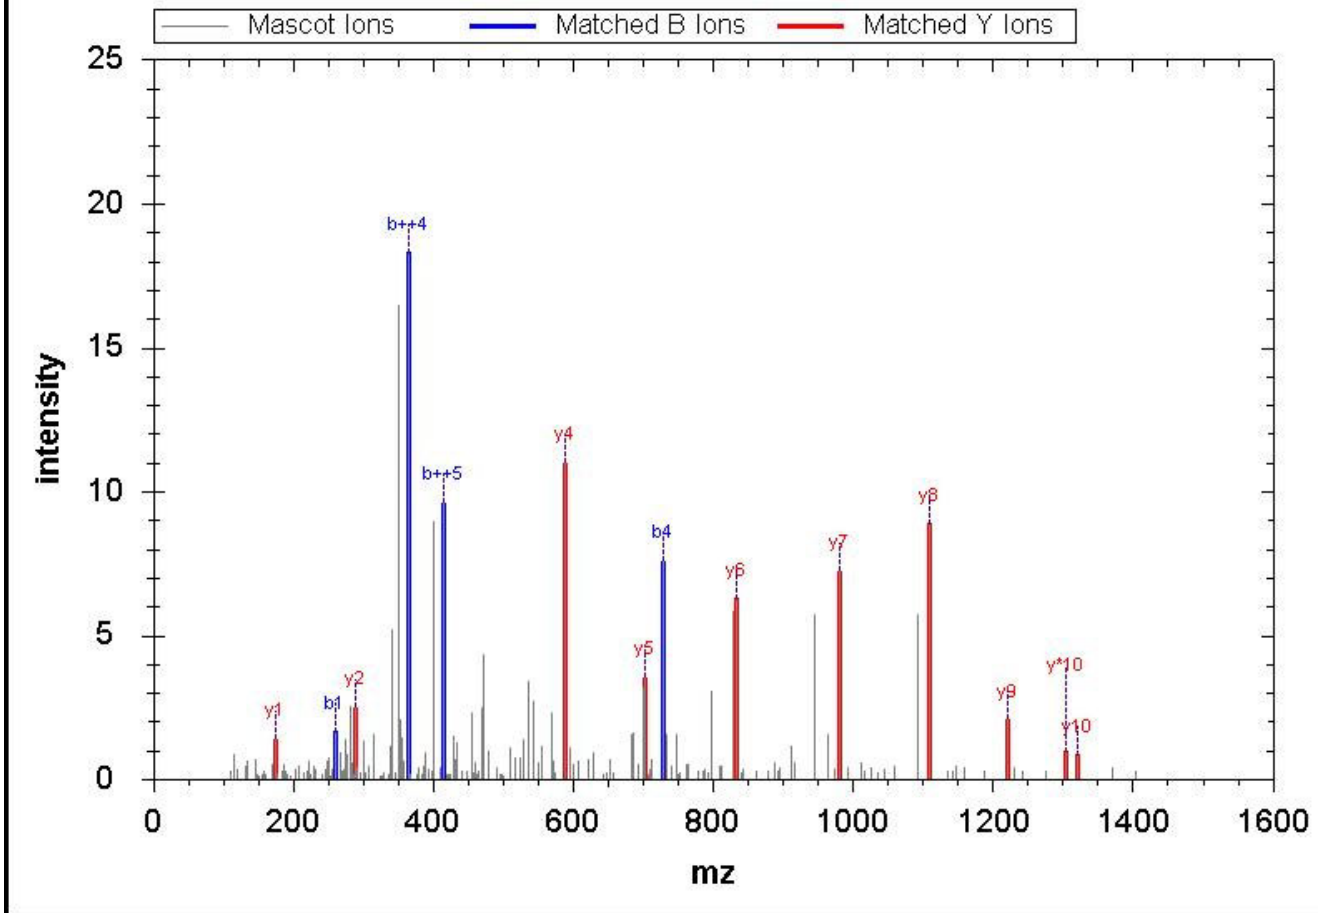

| No | b        | b++    | b*       | b*++   | b0       | b0++   | Seq | y        | y++    | y*       | y*++   | y0       | y0++   | RevNo |
|----|----------|--------|----------|--------|----------|--------|-----|----------|--------|----------|--------|----------|--------|-------|
| 1  | 260.14   | 130.57 |          |        | 242.13   | 121.57 | D   |          |        |          |        |          |        | 14    |
| 2  | 532.33   | 266.67 | 515.31   | 258.16 | 514.32   | 257.67 | K   | 1,789.03 | 895.02 | 1,772.00 | 886.51 | 1,771.02 | 886.01 | 13    |
| 3  | 629.39   | 315.20 | 612.36   | 306.68 | 611.38   | 306.19 | P   | 1,516.83 | 758.92 | 1,499.81 | 750.41 | 1,498.82 | 749.92 | 12    |
| 4  | 728.45   | 364.73 | 711.43   | 356.22 | 710.44   | 355.73 | V   | 1,419.78 | 710.39 | 1,402.76 | 701.88 | 1,401.77 | 701.39 | 11    |
| 5  | 827.52   | 414.27 | 810.50   | 405.75 | 809.51   | 405.26 | V   | 1,320.71 | 660.86 | 1,303.69 | 652.35 | 1,302.70 | 651.85 | 10    |
| 6  | 940.61   | 470.81 | 923.58   | 462.29 | 922.60   | 461.80 | L   | 1,221.64 | 611.33 | 1,204.62 | 602.81 | 1,203.63 | 602.32 | 9     |
| 7  | 1,068.67 | 534.84 | 1,051.64 | 526.32 | 1,050.65 | 525.83 | Q   | 1,108.56 | 554.78 | 1,091.53 | 546.27 | 1,090.55 | 545.78 | 8     |
| 8  | 1,215.73 | 608.37 | 1,198.71 | 599.86 | 1,197.72 | 599.37 | F   | 980.50   | 490.75 | 963.48   | 482.24 | 962.49   | 481.75 | 7     |
| 9  | 1,346.77 | 673.89 | 1,329.75 | 665.38 | 1,328.76 | 664.89 | M   | 833.43   | 417.22 | 816.41   | 408.71 | 815.42   | 408.22 | 6     |
| 10 | 1,461.80 | 731.40 | 1,444.77 | 722.89 | 1,443.79 | 722.40 | D   | 702.39   | 351.70 | 685.37   | 343.19 | 684.38   | 342.69 | 5     |
| 11 | 1,647.88 | 824.44 | 1,630.85 | 815.93 | 1,629.87 | 815.44 | W   | 587.37   | 294.19 | 570.34   | 285.67 |          |        | 4     |
| 12 | 1,760.96 | 880.99 | 1,743.94 | 872.47 | 1,742.95 | 871.98 | I   | 401.29   | 201.15 | 384.26   | 192.63 |          |        | 3     |
| 13 | 1,874.05 | 937.53 | 1,857.02 | 929.01 | 1,856.04 | 928.52 | L   | 288.20   | 144.61 | 271.18   | 136.09 |          |        | 2     |
| 14 |          |        |          |        |          |        | R   | 175.12   | 88.06  | 158.09   | 79.55  |          |        | 1     |

Query 80933 Hit 1

MS/MS Fragmentation of **LDAITDEENDMLDLAYGLTDR**

Found in **sp|P10109|ADX\_HUMAN**, Adrenodoxin

Match to Query 80933: 2526.199from(843.0737,3+)

Title: 860: Sum of 2 scans in range 2756 (rt=68.3293, f=4, i=608) to 2757 (rt=68.3547, f=4, i=609)

[D:\lab212\membrane\Grace\Joyce\iTRAQ\_19\_2\_330.raw]

Data File: Submitted from 20120508-1(merge) by Mascot Daemon on JOYCE-VAIO

Monoisotopic mass of neutral peptide Mr(calc): 2526.199

Variable modifications:

Ions Score: 82.45 Expect: 0.000

### Mascot Matched Ions

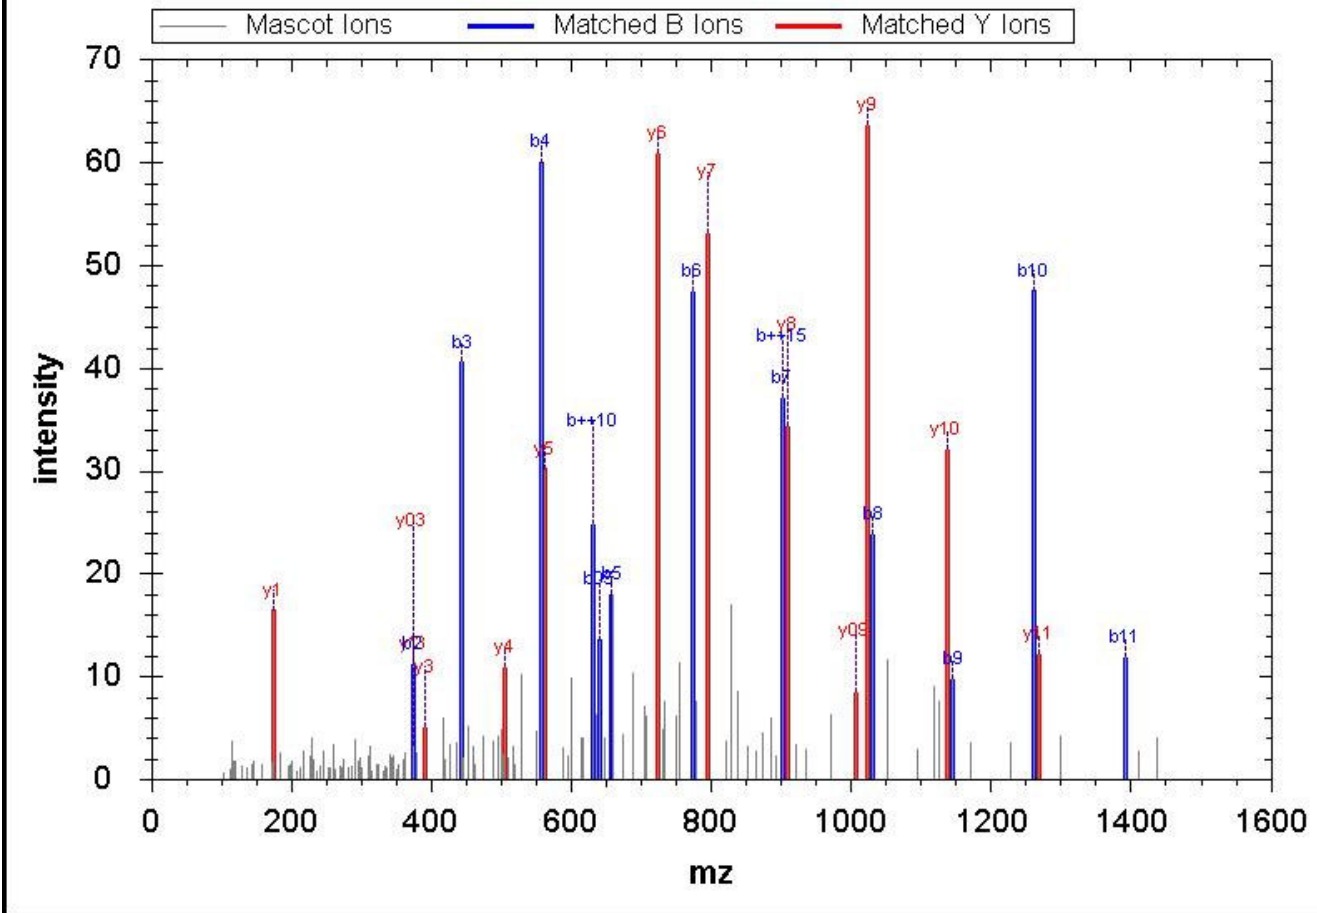

| No | b        | b++      | b*       | b***     | b0       | b0++     | Seq | y        | y++      | y*       | y***     | y0       | y0++     | RevNo |
|----|----------|----------|----------|----------|----------|----------|-----|----------|----------|----------|----------|----------|----------|-------|
| 1  | 258.19   | 129.60   |          |          |          |          | L   |          |          |          |          |          |          | 21    |
| 2  | 373.22   | 187.11   |          |          | 355.21   | 178.11   | D   | 2,270.01 | 1,135.51 | 2,252.99 | 1,127.00 | 2,252.00 | 1,126.50 | 20    |
| 3  | 444.26   | 222.63   |          |          | 426.25   | 213.63   | A   | 2,154.99 | 1,078.00 | 2,137.96 | 1,069.48 | 2,136.98 | 1,068.99 | 19    |
| 4  | 557.34   | 279.17   |          |          | 539.33   | 270.17   | I   | 2,083.95 | 1,042.48 | 2,066.92 | 1,033.96 | 2,065.94 | 1,033.47 | 18    |
| 5  | 658.39   | 329.70   |          |          | 640.38   | 320.69   | T   | 1,970.86 | 985.94   | 1,953.84 | 977.42   | 1,952.85 | 976.93   | 17    |
| 6  | 773.42   | 387.21   |          |          | 755.41   | 378.21   | D   | 1,869.82 | 935.41   | 1,852.79 | 926.90   | 1,851.81 | 926.41   | 16    |
| 7  | 902.46   | 451.73   |          |          | 884.45   | 442.73   | E   | 1,754.79 | 877.90   | 1,737.76 | 869.39   | 1,736.78 | 868.89   | 15    |
| 8  | 1,031.50 | 516.25   |          |          | 1,013.49 | 507.25   | E   | 1,625.75 | 813.38   | 1,608.72 | 804.86   | 1,607.74 | 804.37   | 14    |
| 9  | 1,145.54 | 573.28   | 1,128.52 | 564.76   | 1,127.53 | 564.27   | N   | 1,496.71 | 748.86   | 1,479.68 | 740.34   | 1,478.69 | 739.85   | 13    |
| 10 | 1,260.57 | 630.79   | 1,243.54 | 622.28   | 1,242.56 | 621.78   | D   | 1,382.66 | 691.83   | 1,365.64 | 683.32   | 1,364.65 | 682.83   | 12    |
| 11 | 1,391.61 | 696.31   | 1,374.59 | 687.80   | 1,373.60 | 687.30   | M   | 1,267.64 | 634.32   | 1,250.61 | 625.81   | 1,249.62 | 625.32   | 11    |
| 12 | 1,504.70 | 752.85   | 1,487.67 | 744.34   | 1,486.69 | 743.85   | L   | 1,136.59 | 568.80   | 1,119.57 | 560.29   | 1,118.58 | 559.80   | 10    |
| 13 | 1,619.72 | 810.37   | 1,602.70 | 801.85   | 1,601.71 | 801.36   | D   | 1,023.51 | 512.26   | 1,006.48 | 503.75   | 1,005.50 | 503.25   | 9     |
| 14 | 1,732.81 | 866.91   | 1,715.78 | 858.39   | 1,714.80 | 857.90   | L   | 908.48   | 454.75   | 891.46   | 446.23   | 890.47   | 445.74   | 8     |
| 15 | 1,803.84 | 902.43   | 1,786.82 | 893.91   | 1,785.83 | 893.42   | A   | 795.40   | 398.20   | 778.37   | 389.69   | 777.39   | 389.20   | 7     |
| 16 | 1,966.91 | 983.96   | 1,949.88 | 975.44   | 1,948.90 | 974.95   | Y   | 724.36   | 362.68   | 707.34   | 354.17   | 706.35   | 353.68   | 6     |
| 17 | 2,023.93 | 1,012.47 | 2,006.90 | 1,003.95 | 2,005.92 | 1,003.46 | G   | 561.30   | 281.15   | 544.27   | 272.64   | 543.29   | 272.15   | 5     |
| 18 | 2,137.01 | 1,069.01 | 2,119.99 | 1,060.50 | 2,119.00 | 1,060.00 | L   | 504.28   | 252.64   | 487.25   | 244.13   | 486.27   | 243.64   | 4     |
| 19 | 2,238.06 | 1,119.53 | 2,221.03 | 1,111.02 | 2,220.05 | 1,110.53 | T   | 391.19   | 196.10   | 374.17   | 187.59   | 373.18   | 187.10   | 3     |
| 20 | 2,353.09 | 1,177.05 | 2,336.06 | 1,168.53 | 2,335.08 | 1,168.04 | D   | 290.15   | 145.58   | 273.12   | 137.06   | 272.14   | 136.57   | 2     |
| 21 |          |          |          |          |          |          | R   | 175.12   | 88.06    | 158.09   | 79.55    |          |          | 1     |

MS/MS Fragmentation of **FVADEELVHLLLDEVVASAALR**

Found in **sp|Q9UID3|FFR\_HUMAN**, Protein fat-free homolog OS=Homo sapiens GN=FFR PE=1 SV=2

Match to Query 81684: 2552.398from(851.8067,3+)

Title: 1266: Sum of 2 scans in range 3230 (rt=80.0027, f=2, i=539) to 3231 (rt=80.0281, f=2, i=540)

[D:\lab212\membrane\GraceJoyce\iTRAQ\_29\_1.raw]

Data File:Submitted from 20120508-1(merge) by Mascot Daemon on JOYCE-VAIO

Monoisotopic mass of neutral peptide Mr(calc): 2552.398

Variable modifications:

Ions Score: 82.01 Expect: 0.000

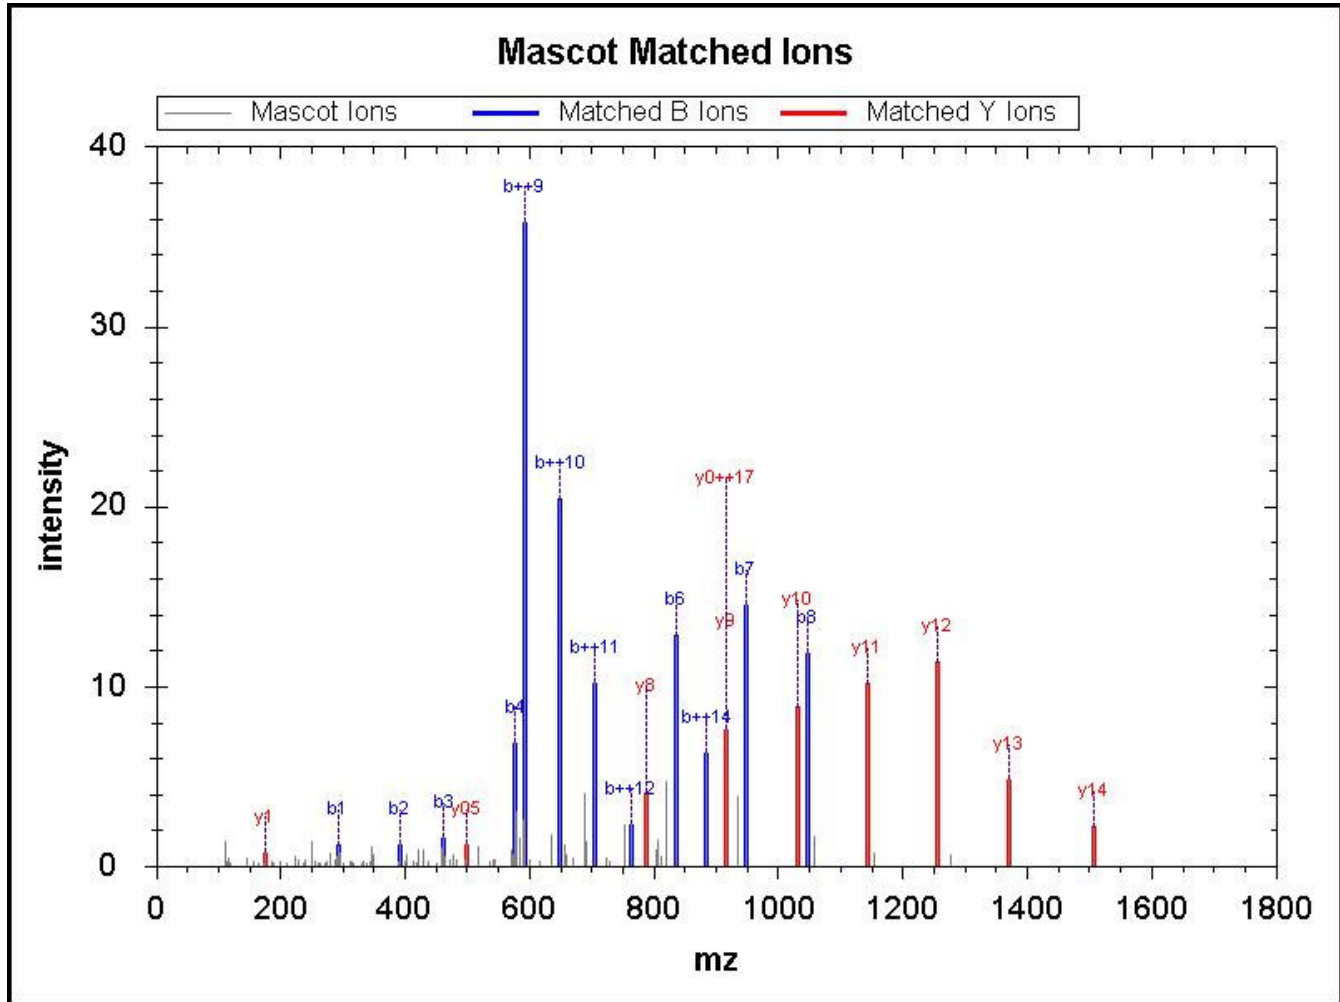

| No | b        | b++    | b0       | b0++   | Seq | y        | y++      | y*       | y*++     | y0       | y0++     | RevNo |
|----|----------|--------|----------|--------|-----|----------|----------|----------|----------|----------|----------|-------|
| 1  | 292.18   | 146.59 |          |        | F   |          |          |          |          |          |          | 22    |
| 2  | 391.25   | 196.13 |          |        | V   | 2,262.23 | 1,131.62 | 2,245.21 | 1,123.11 | 2,244.22 | 1,122.62 | 21    |
| 3  | 462.28   | 231.65 |          |        | A   | 2,163.17 | 1,082.09 | 2,146.14 | 1,073.57 | 2,145.16 | 1,073.08 | 20    |
| 4  | 577.31   | 289.16 | 559.30   | 280.15 | D   | 2,092.13 | 1,046.57 | 2,075.10 | 1,038.05 | 2,074.12 | 1,037.56 | 19    |
| 5  | 706.35   | 353.68 | 688.34   | 344.67 | E   | 1,977.10 | 989.05   | 1,960.08 | 980.54   | 1,959.09 | 980.05   | 18    |
| 6  | 835.40   | 418.20 | 817.38   | 409.20 | E   | 1,848.06 | 924.53   | 1,831.03 | 916.02   | 1,830.05 | 915.53   | 17    |
| 7  | 948.48   | 474.74 | 930.47   | 465.74 | L   | 1,719.02 | 860.01   | 1,701.99 | 851.50   | 1,701.01 | 851.01   | 16    |
| 8  | 1,047.55 | 524.28 | 1,029.54 | 515.27 | V   | 1,605.93 | 803.47   | 1,588.91 | 794.96   | 1,587.92 | 794.46   | 15    |
| 9  | 1,184.61 | 592.81 | 1,166.60 | 583.80 | H   | 1,506.86 | 753.94   | 1,489.84 | 745.42   | 1,488.85 | 744.93   | 14    |
| 10 | 1,297.69 | 649.35 | 1,279.68 | 640.34 | L   | 1,369.81 | 685.41   | 1,352.78 | 676.89   | 1,351.79 | 676.40   | 13    |
| 11 | 1,410.78 | 705.89 | 1,392.76 | 696.89 | L   | 1,256.72 | 628.86   | 1,239.69 | 620.35   | 1,238.71 | 619.86   | 12    |
| 12 | 1,523.86 | 762.43 | 1,505.85 | 753.43 | L   | 1,143.64 | 572.32   | 1,126.61 | 563.81   | 1,125.63 | 563.32   | 11    |
| 13 | 1,638.89 | 819.95 | 1,620.88 | 810.94 | D   | 1,030.55 | 515.78   | 1,013.53 | 507.27   | 1,012.54 | 506.77   | 10    |
| 14 | 1,767.93 | 884.47 | 1,749.92 | 875.46 | E   | 915.53   | 458.27   | 898.50   | 449.75   | 897.52   | 449.26   | 9     |
| 15 | 1,867.00 | 934.00 | 1,848.99 | 925.00 | V   | 786.48   | 393.75   | 769.46   | 385.23   | 768.47   | 384.74   | 8     |
| 16 | 1,966.07 | 983.54 | 1,948.05 | 974.53 | V   | 687.41   | 344.21   | 670.39   | 335.70   | 669.40   | 335.21   | 7     |

|    |          |          |          |          |   |        |        |        |        |        |        |   |
|----|----------|----------|----------|----------|---|--------|--------|--------|--------|--------|--------|---|
| 17 | 2,037.10 | 1,019.05 | 2,019.09 | 1,010.05 | A | 588.35 | 294.68 | 571.32 | 286.16 | 570.34 | 285.67 | 6 |
| 18 | 2,124.13 | 1,062.57 | 2,106.12 | 1,053.57 | S | 517.31 | 259.16 | 500.28 | 250.64 | 499.30 | 250.15 | 5 |
| 19 | 2,195.17 | 1,098.09 | 2,177.16 | 1,089.08 | A | 430.28 | 215.64 | 413.25 | 207.13 |        |        | 4 |
| 20 | 2,266.21 | 1,133.61 | 2,248.20 | 1,124.60 | A | 359.24 | 180.12 | 342.21 | 171.61 |        |        | 3 |
| 21 | 2,379.29 | 1,190.15 | 2,361.28 | 1,181.14 | L | 288.20 | 144.61 | 271.18 | 136.09 |        |        | 2 |
| 22 |          |          |          |          | R | 175.12 | 88.06  | 158.09 | 79.55  |        |        | 1 |

Query 63653 Hit 1

MS/MS Fragmentation of **GAHLTALEMLTAFASHIR**

Found in **sp|Q96EL3|RM53\_HUMAN**, 39S ribosomal protein L53

Match to Query 63653: 2082.113from(521.5355,4+)

Title: 1116: Sum of 2 scans in range 2499 (rt=65.764, f=4, i=766) to 2500 (rt=65.7894, f=4, i=767)

[D:\lab212\membrane\Grace\Joyce\47\_1.raw]

Data File: Submitted from 20120508-1(merge) by Mascot Daemon on JOYCE-VAIO

Monoisotopic mass of neutral peptide Mr(calc): 2082.113

Variable modifications:

Ions Score: 81.07 Expect: 0.000

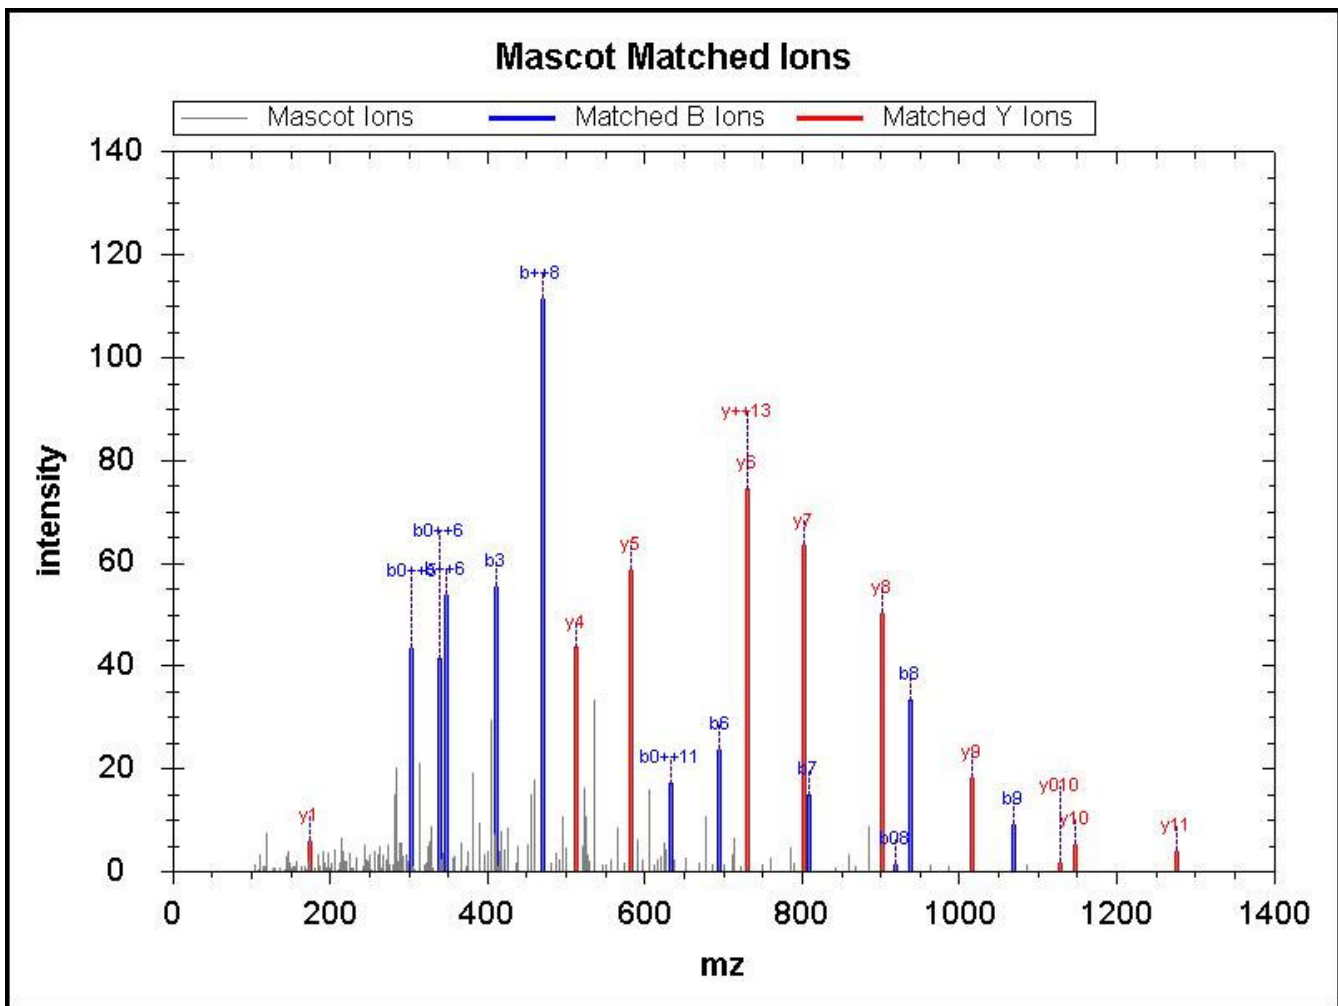

| No | b      | b++    | b0     | b0++   | Seq | y        | y++    | y*       | y*++   | y0       | y0++   | RevNo |
|----|--------|--------|--------|--------|-----|----------|--------|----------|--------|----------|--------|-------|
| 1  | 202.13 | 101.57 |        |        | G   |          |        |          |        |          |        | 18    |
| 2  | 273.17 | 137.09 |        |        | A   | 1,882.00 | 941.50 | 1,864.97 | 932.99 | 1,863.99 | 932.50 | 17    |
| 3  | 410.23 | 205.62 |        |        | H   | 1,810.96 | 905.99 | 1,793.94 | 897.47 | 1,792.95 | 896.98 | 16    |
| 4  | 523.31 | 262.16 |        |        | L   | 1,673.90 | 837.46 | 1,656.88 | 828.94 | 1,655.89 | 828.45 | 15    |
| 5  | 624.36 | 312.68 | 606.35 | 303.68 | T   | 1,560.82 | 780.91 | 1,543.79 | 772.40 | 1,542.81 | 771.91 | 14    |
| 6  | 695.40 | 348.20 | 677.39 | 339.20 | A   | 1,459.77 | 730.39 | 1,442.75 | 721.88 | 1,441.76 | 721.38 | 13    |
| 7  | 808.48 | 404.74 | 790.47 | 395.74 | L   | 1,388.74 | 694.87 | 1,371.71 | 686.36 | 1,370.72 | 685.87 | 12    |
| 8  | 937.52 | 469.26 | 919.51 | 460.26 | E   | 1,275.65 | 638.33 | 1,258.62 | 629.82 | 1,257.64 | 629.32 | 11    |



|    |          |        |          |        |   |          |        |          |        |          |        |    |
|----|----------|--------|----------|--------|---|----------|--------|----------|--------|----------|--------|----|
| 9  | 1,068.56 | 534.79 | 1,050.55 | 525.78 | M | 1,146.61 | 573.81 | 1,129.58 | 565.29 | 1,128.60 | 564.80 | 10 |
| 10 | 1,181.65 | 591.33 | 1,163.64 | 582.32 | L | 1,015.57 | 508.29 | 998.54   | 499.77 | 997.56   | 499.28 | 9  |
| 11 | 1,282.69 | 641.85 | 1,264.68 | 632.85 | T | 902.48   | 451.75 | 885.46   | 443.23 | 884.47   | 442.74 | 8  |
| 12 | 1,353.73 | 677.37 | 1,335.72 | 668.36 | A | 801.44   | 401.22 | 784.41   | 392.71 | 783.43   | 392.22 | 7  |
| 13 | 1,500.80 | 750.90 | 1,482.79 | 741.90 | F | 730.40   | 365.70 | 713.37   | 357.19 | 712.39   | 356.70 | 6  |
| 14 | 1,571.84 | 786.42 | 1,553.83 | 777.42 | A | 583.33   | 292.17 | 566.30   | 283.66 | 565.32   | 283.16 | 5  |
| 15 | 1,658.87 | 829.94 | 1,640.86 | 820.93 | S | 512.29   | 256.65 | 495.27   | 248.14 | 494.28   | 247.65 | 4  |
| 16 | 1,795.93 | 898.47 | 1,777.92 | 889.46 | H | 425.26   | 213.13 | 408.24   | 204.62 |          |        | 3  |
| 17 | 1,909.01 | 955.01 | 1,891.00 | 946.00 | I | 288.20   | 144.61 | 271.18   | 136.09 |          |        | 2  |
| 18 |          |        |          |        | R | 175.12   | 88.06  | 158.09   | 79.55  |          |        | 1  |

Query 72108 Hit 1

MS/MS Fragmentation of **VLYFGDHLYSDLADMLR**

Found in **sp|Q9H857|NT5D2\_HUMAN**, 5'-nucleotidase domain-containing protein 2 OS=Homo sapiens GN=NT5DC2 PE=1 SV=1

Match to Query 72108: 2284.168from(762.3968,3+)

Title: 1206: Sum of 2 scans in range 2722 (rt=70.3926, f=2, i=453) to 2723 (rt=70.418, f=2, i=454)

[D:\lab212\membrane\GraceJoyce\iTRAQ\_32\_1.raw]

Data File:Submitted from 20120508-1(merge) by Mascot Daemon on JOYCE-VAIO

Monoisotopic mass of neutral peptide Mr(calc): 2284.168

Variable modifications:

Ions Score: 79.58 Expect: 0.000

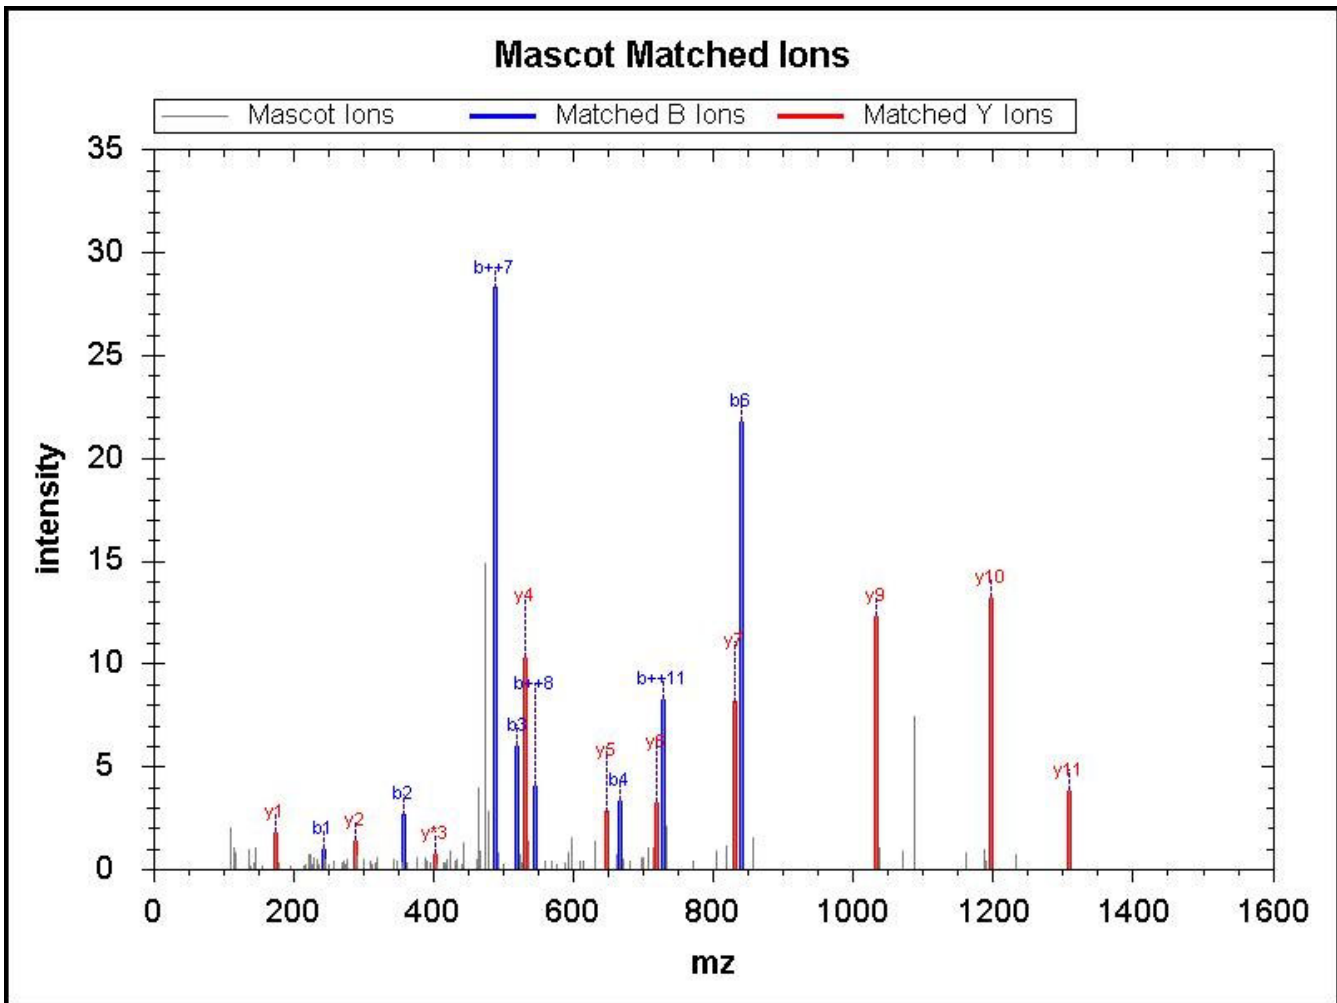

| No | b      | b++    | b0 | b0++ | Seq | y        | y++      | y*       | y*++     | y0       | y0++     | RevNo |
|----|--------|--------|----|------|-----|----------|----------|----------|----------|----------|----------|-------|
| 1  | 244.18 | 122.59 |    |      | V   |          |          |          |          |          |          | 18    |
| 2  | 357.26 | 179.13 |    |      | L   | 2,042.01 | 1,021.51 | 2,024.98 | 1,012.99 | 2,023.99 | 1,012.50 | 17    |
| 3  | 520.33 | 260.67 |    |      | Y   | 1,928.92 | 964.96   | 1,911.89 | 956.45   | 1,910.91 | 955.96   | 16    |

|    |          |          |          |          |   |          |        |          |        |          |        |    |
|----|----------|----------|----------|----------|---|----------|--------|----------|--------|----------|--------|----|
| 4  | 667.39   | 334.20   |          |          | F | 1,765.86 | 883.43 | 1,748.83 | 874.92 | 1,747.85 | 874.43 | 15 |
| 5  | 724.42   | 362.71   |          |          | G | 1,618.79 | 809.90 | 1,601.76 | 801.39 | 1,600.78 | 800.89 | 14 |
| 6  | 839.44   | 420.22   | 821.43   | 411.22   | D | 1,561.77 | 781.39 | 1,544.74 | 772.87 | 1,543.76 | 772.38 | 13 |
| 7  | 976.50   | 488.75   | 958.49   | 479.75   | H | 1,446.74 | 723.87 | 1,429.71 | 715.36 | 1,428.73 | 714.87 | 12 |
| 8  | 1,089.58 | 545.30   | 1,071.57 | 536.29   | L | 1,309.68 | 655.34 | 1,292.66 | 646.83 | 1,291.67 | 646.34 | 11 |
| 9  | 1,252.65 | 626.83   | 1,234.64 | 617.82   | Y | 1,196.60 | 598.80 | 1,179.57 | 590.29 | 1,178.59 | 589.80 | 10 |
| 10 | 1,339.68 | 670.34   | 1,321.67 | 661.34   | S | 1,033.53 | 517.27 | 1,016.51 | 508.76 | 1,015.52 | 508.27 | 9  |
| 11 | 1,454.71 | 727.86   | 1,436.70 | 718.85   | D | 946.50   | 473.75 | 929.48   | 465.24 | 928.49   | 464.75 | 8  |
| 12 | 1,567.79 | 784.40   | 1,549.78 | 775.39   | L | 831.48   | 416.24 | 814.45   | 407.73 | 813.47   | 407.24 | 7  |
| 13 | 1,638.83 | 819.92   | 1,620.82 | 810.91   | A | 718.39   | 359.70 | 701.36   | 351.19 | 700.38   | 350.69 | 6  |
| 14 | 1,753.86 | 877.43   | 1,735.84 | 868.43   | D | 647.35   | 324.18 | 630.33   | 315.67 | 629.34   | 315.18 | 5  |
| 15 | 1,866.94 | 933.97   | 1,848.93 | 924.97   | L | 532.33   | 266.67 | 515.30   | 258.15 |          |        | 4  |
| 16 | 1,997.98 | 999.49   | 1,979.97 | 990.49   | M | 419.24   | 210.13 | 402.22   | 201.61 |          |        | 3  |
| 17 | 2,111.06 | 1,056.04 | 2,093.05 | 1,047.03 | L | 288.20   | 144.61 | 271.18   | 136.09 |          |        | 2  |
| 18 |          |          |          |          | R | 175.12   | 88.06  | 158.09   | 79.55  |          |        | 1  |

Query 63485 Hit 1

MS/MS Fragmentation of **EVLEYLGNPANYPVSIR**

Found in **sp|Q9Y296|TPPC4\_HUMAN**, Trafficking protein particle complex subunit 4 OS=Homo sapiens GN=TRAPPC4 PE=1 SV=1

Match to Query 63485: 2077.102from(693.3746,3+)

Title: 593: Sum of 2 scans in range 2198 (rt=55.7559, f=4, i=428) to 2199 (rt=55.7813, f=4, i=429)

[D:\lab212\membrane\Grace\Joyce\iTRAQ\_19\_2\_330.raw]

Data File: Submitted from 20120508-1(merge) by Mascot Daemon on JOYCE-VAIO

Monoisotopic mass of neutral peptide Mr(calc): 2077.102

Variable modifications:

Ions Score: 79.46 Expect: 0.000

### Mascot Matched Ions

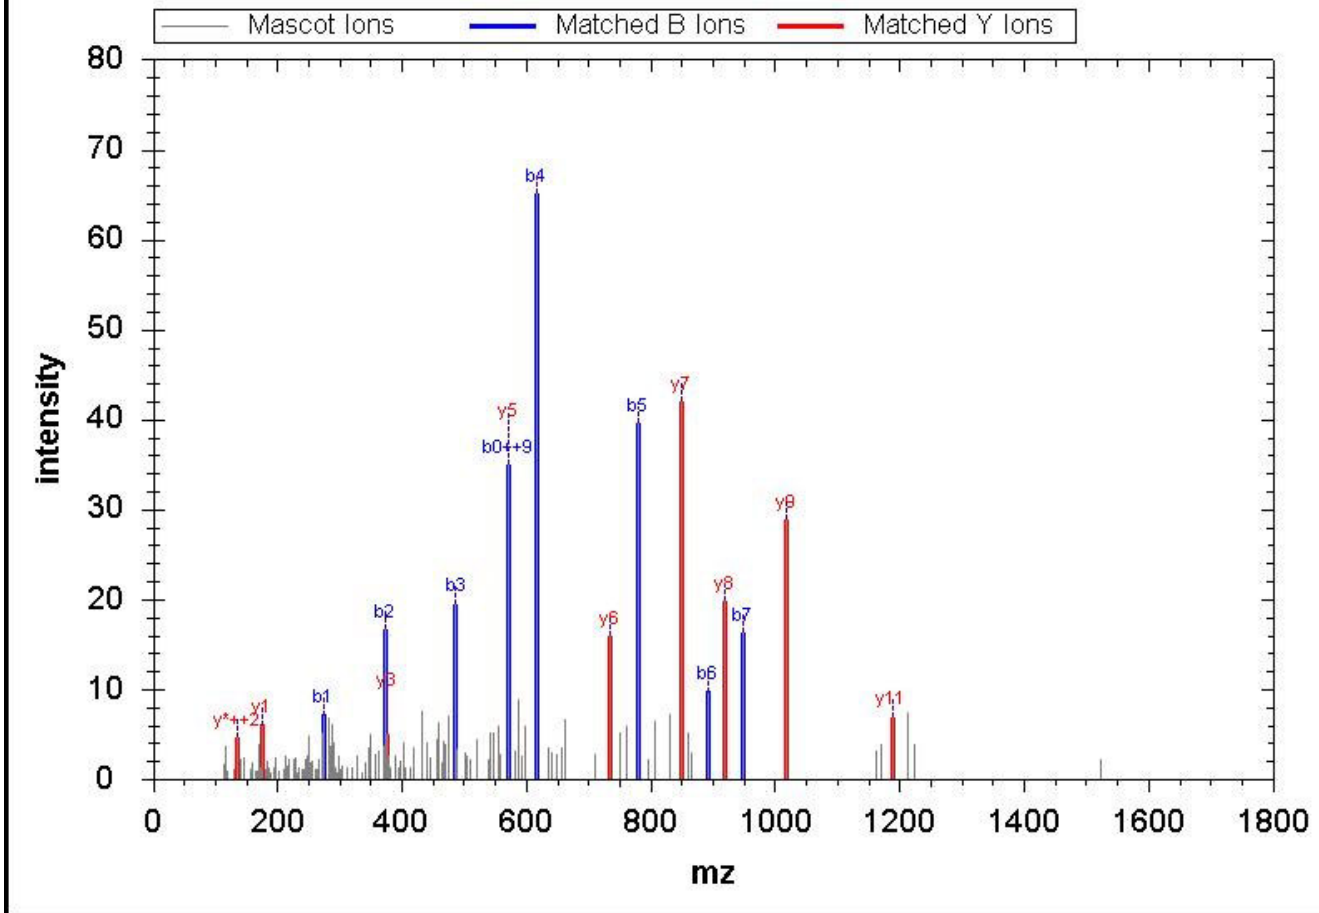

| No | b        | b++    | b*       | b*++   | b0       | b0++   | Seq | y        | y++    | y*       | y*++   | y0       | y0++   | RevNo |
|----|----------|--------|----------|--------|----------|--------|-----|----------|--------|----------|--------|----------|--------|-------|
| 1  | 274.15   | 137.58 |          |        | 256.14   | 128.57 | E   |          |        |          |        |          |        | 17    |
| 2  | 373.22   | 187.11 |          |        | 355.21   | 178.11 | V   | 1,804.96 | 902.98 | 1,787.93 | 894.47 | 1,786.95 | 893.98 | 16    |
| 3  | 486.30   | 243.66 |          |        | 468.29   | 234.65 | L   | 1,705.89 | 853.45 | 1,688.86 | 844.94 | 1,687.88 | 844.44 | 15    |
| 4  | 615.35   | 308.18 |          |        | 597.34   | 299.17 | E   | 1,592.81 | 796.91 | 1,575.78 | 788.39 | 1,574.80 | 787.90 | 14    |
| 5  | 778.41   | 389.71 |          |        | 760.40   | 380.70 | Y   | 1,463.76 | 732.39 | 1,446.74 | 723.87 | 1,445.75 | 723.38 | 13    |
| 6  | 891.49   | 446.25 |          |        | 873.48   | 437.25 | L   | 1,300.70 | 650.85 | 1,283.67 | 642.34 | 1,282.69 | 641.85 | 12    |
| 7  | 948.52   | 474.76 |          |        | 930.51   | 465.76 | G   | 1,187.62 | 594.31 | 1,170.59 | 585.80 | 1,169.61 | 585.31 | 11    |
| 8  | 1,062.56 | 531.78 | 1,045.53 | 523.27 | 1,044.55 | 522.78 | N   | 1,130.60 | 565.80 | 1,113.57 | 557.29 | 1,112.58 | 556.80 | 10    |
| 9  | 1,159.61 | 580.31 | 1,142.59 | 571.80 | 1,141.60 | 571.30 | P   | 1,016.55 | 508.78 | 999.53   | 500.27 | 998.54   | 499.77 | 9     |
| 10 | 1,230.65 | 615.83 | 1,213.62 | 607.31 | 1,212.64 | 606.82 | A   | 919.50   | 460.25 | 902.47   | 451.74 | 901.49   | 451.25 | 8     |
| 11 | 1,344.69 | 672.85 | 1,327.67 | 664.34 | 1,326.68 | 663.84 | N   | 848.46   | 424.73 | 831.44   | 416.22 | 830.45   | 415.73 | 7     |
| 12 | 1,507.76 | 754.38 | 1,490.73 | 745.87 | 1,489.74 | 745.38 | Y   | 734.42   | 367.71 | 717.39   | 359.20 | 716.41   | 358.71 | 6     |
| 13 | 1,604.81 | 802.91 | 1,587.78 | 794.39 | 1,586.80 | 793.90 | P   | 571.36   | 286.18 | 554.33   | 277.67 | 553.35   | 277.18 | 5     |
| 14 | 1,703.88 | 852.44 | 1,686.85 | 843.93 | 1,685.87 | 843.44 | V   | 474.30   | 237.66 | 457.28   | 229.14 | 456.29   | 228.65 | 4     |
| 15 | 1,790.91 | 895.96 | 1,773.88 | 887.44 | 1,772.90 | 886.95 | S   | 375.24   | 188.12 | 358.21   | 179.61 | 357.22   | 179.12 | 3     |
| 16 | 1,903.99 | 952.50 | 1,886.97 | 943.99 | 1,885.98 | 943.49 | I   | 288.20   | 144.61 | 271.18   | 136.09 |          |        | 2     |
| 17 |          |        |          |        |          |        | R   | 175.12   | 88.06  | 158.09   | 79.55  |          |        | 1     |

Query 59379 Hit 1

MS/MS Fragmentation of **AALEAIDELDLFGAHGGR**

Found in **sp|P46019|KPB2\_HUMAN**, Phosphorylase b kinase regulatory subunit alpha

Match to Query 59379: 1998.028from(667.0167,3+)

Title: 928: Sum of 2 scans in range 2039 (rt=55.4638, f=4, i=621) to 2040 (rt=55.4893, f=4, i=622)

[D:\lab212\membrane\GraceJoyce\iTRAQ\_34\_2.raw]

Data File: Submitted from 20120508-1(merge) by Mascot Daemon on JOYCE-VAIO

Monoisotopic mass of neutral peptide Mr(calc): 1998.028

Variable modifications:

Ions Score: 78.95 Expect: 0.000

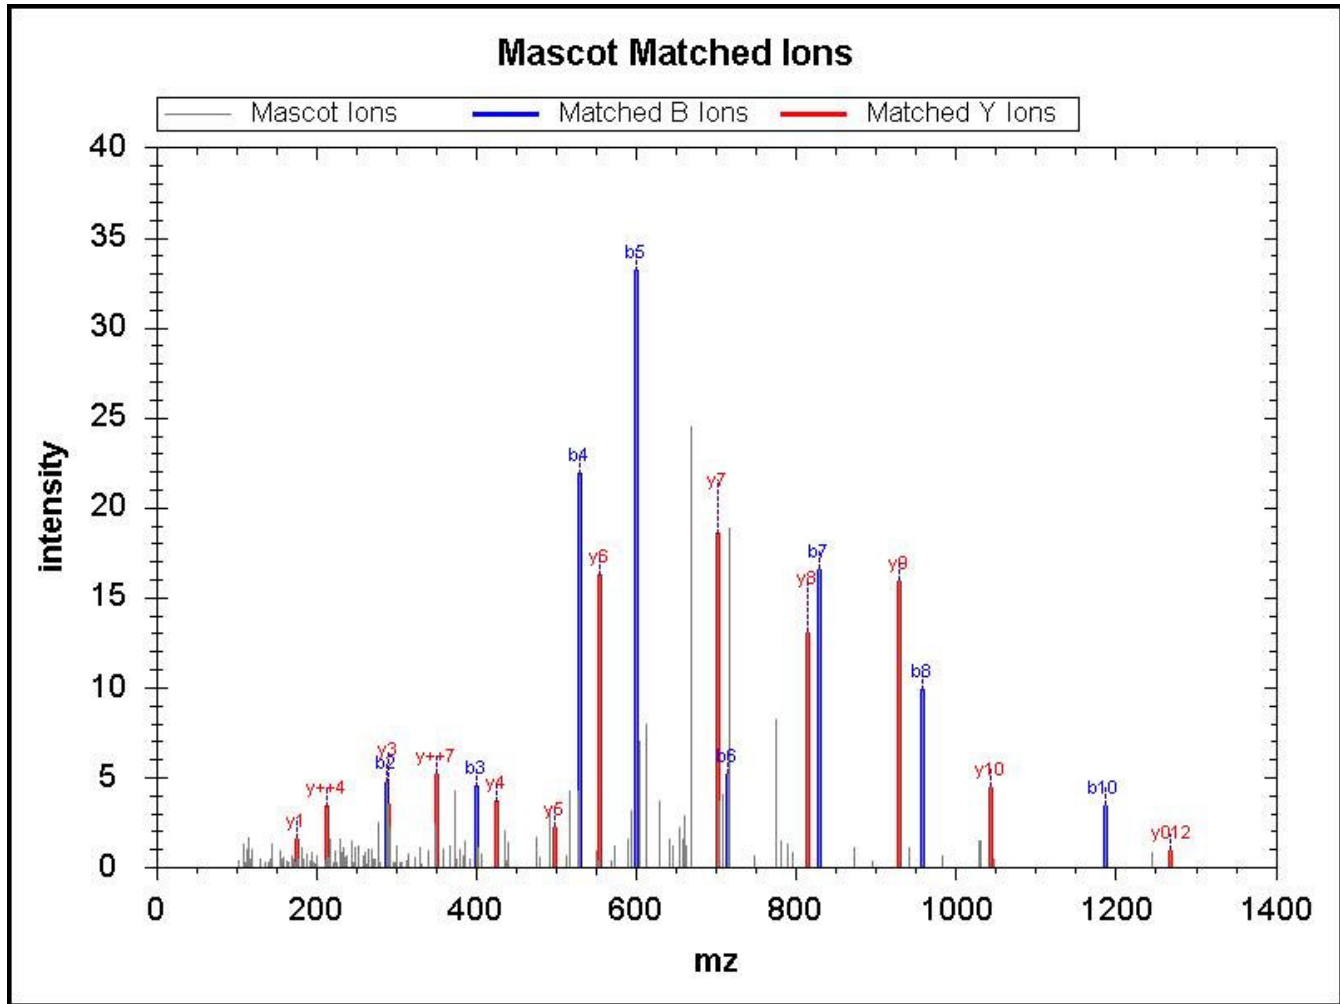

| No | b        | b++    | b0       | b0++   | Seq | y        | y++    | y*       | y*++   | y0       | y0++   | RevNo |
|----|----------|--------|----------|--------|-----|----------|--------|----------|--------|----------|--------|-------|
| 1  | 216.15   | 108.58 |          |        | A   |          |        |          |        |          |        | 18    |
| 2  | 287.18   | 144.10 |          |        | A   | 1,783.90 | 892.45 | 1,766.87 | 883.94 | 1,765.89 | 883.45 | 17    |
| 3  | 400.27   | 200.64 |          |        | L   | 1,712.86 | 856.93 | 1,695.83 | 848.42 | 1,694.85 | 847.93 | 16    |
| 4  | 529.31   | 265.16 | 511.30   | 256.15 | E   | 1,599.78 | 800.39 | 1,582.75 | 791.88 | 1,581.77 | 791.39 | 15    |
| 5  | 600.35   | 300.68 | 582.34   | 291.67 | A   | 1,470.73 | 735.87 | 1,453.71 | 727.36 | 1,452.72 | 726.87 | 14    |
| 6  | 713.43   | 357.22 | 695.42   | 348.21 | I   | 1,399.70 | 700.35 | 1,382.67 | 691.84 | 1,381.69 | 691.35 | 13    |
| 7  | 828.46   | 414.73 | 810.45   | 405.73 | D   | 1,286.61 | 643.81 | 1,269.59 | 635.30 | 1,268.60 | 634.80 | 12    |
| 8  | 957.50   | 479.25 | 939.49   | 470.25 | E   | 1,171.59 | 586.30 | 1,154.56 | 577.78 | 1,153.57 | 577.29 | 11    |
| 9  | 1,070.59 | 535.80 | 1,052.57 | 526.79 | L   | 1,042.54 | 521.78 | 1,025.52 | 513.26 | 1,024.53 | 512.77 | 10    |
| 10 | 1,185.61 | 593.31 | 1,167.60 | 584.30 | D   | 929.46   | 465.23 | 912.43   | 456.72 | 911.45   | 456.23 | 9     |
| 11 | 1,298.70 | 649.85 | 1,280.69 | 640.85 | L   | 814.43   | 407.72 | 797.41   | 399.21 |          |        | 8     |
| 12 | 1,445.76 | 723.39 | 1,427.75 | 714.38 | F   | 701.35   | 351.18 | 684.32   | 342.66 |          |        | 7     |
| 13 | 1,502.79 | 751.90 | 1,484.78 | 742.89 | G   | 554.28   | 277.64 | 537.25   | 269.13 |          |        | 6     |
| 14 | 1,573.82 | 787.42 | 1,555.81 | 778.41 | A   | 497.26   | 249.13 | 480.23   | 240.62 |          |        | 5     |
| 15 | 1,710.88 | 855.94 | 1,692.87 | 846.94 | H   | 426.22   | 213.61 | 409.19   | 205.10 |          |        | 4     |
| 16 | 1,767.90 | 884.46 | 1,749.89 | 875.45 | G   | 289.16   | 145.08 | 272.14   | 136.57 |          |        | 3     |
| 17 | 1,824.93 | 912.97 | 1,806.91 | 903.96 | G   | 232.14   | 116.57 | 215.11   | 108.06 |          |        | 2     |
| 18 |          |        |          |        | R   | 175.12   | 88.06  | 158.09   | 79.55  |          |        | 1     |

MS/MS Fragmentation of **NTFWDVDGSMVPPEWHR**

Found in **sp|Q9UI09|NDUAC\_HUMAN**, NADH dehydrogenase [ubiquinone] 1 alpha subcomplex subunit 12 OS=Homo sapiens

GN=NDUFA12 PE=1 SV=1

Match to Query 69319: 2216.029 from (739.6837,3+)

Title: 792: Scan 1779 (rt=49.4788, f=2, i=279) [D:\lab212\membrane\Grace\Joyce\iTRAQ\_35\_2.raw]

Data File: Submitted from 20120508-1(merge) by Mascot Daemon on JOYCE-VAIO

Monoisotopic mass of neutral peptide Mr(calc): 2216.029

Variable modifications:

Ions Score: 78.01 Expect: 0.000

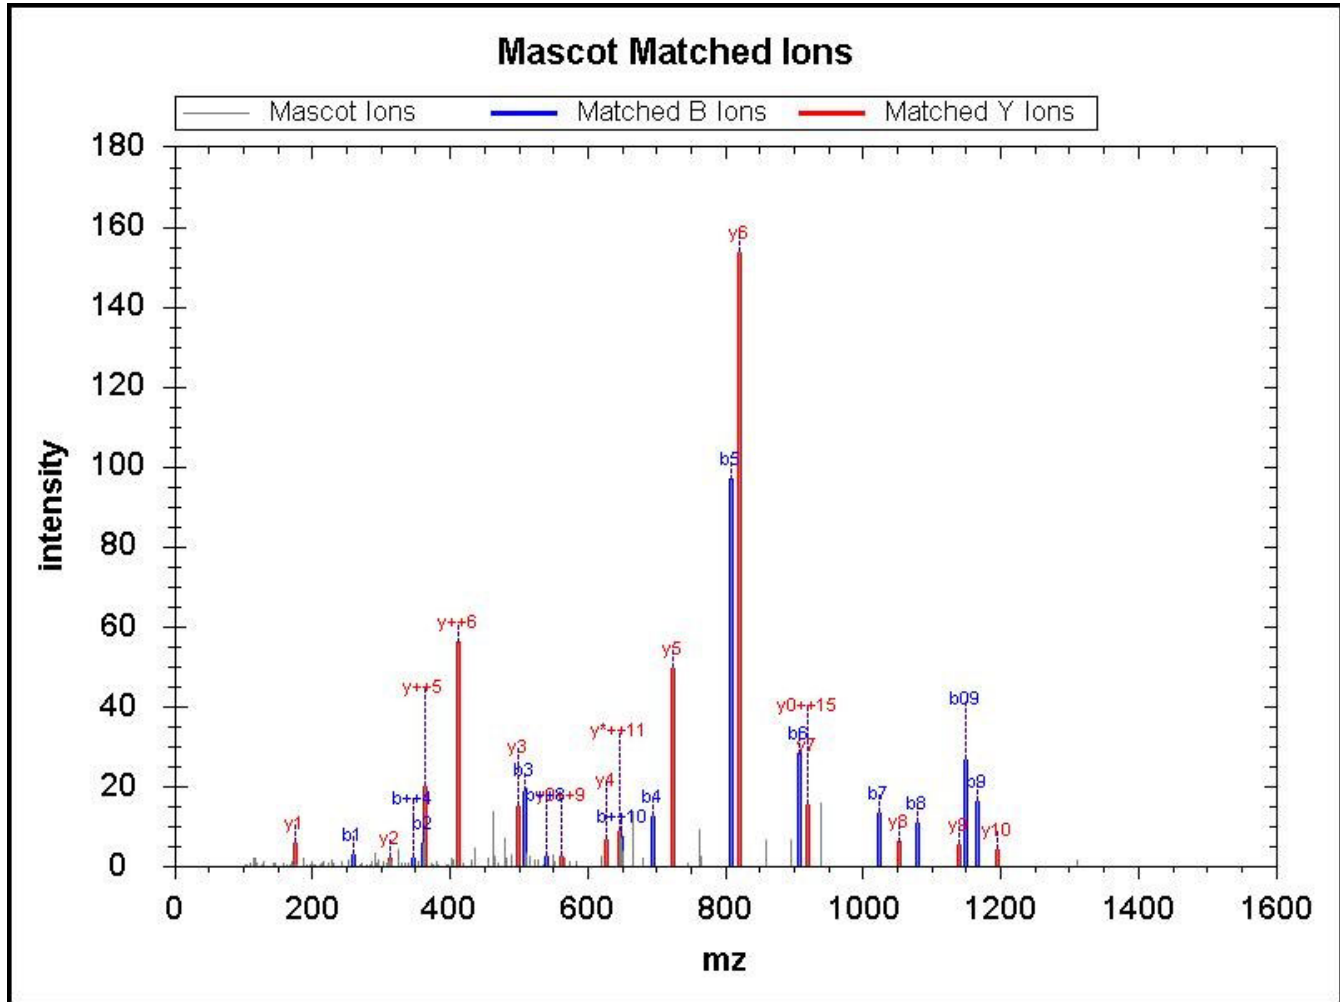

| No | b        | b++      | b*       | b*++     | b0       | b0++     | Seq | y        | y++    | y*       | y*++   | y0       | y0++   | RevNo |
|----|----------|----------|----------|----------|----------|----------|-----|----------|--------|----------|--------|----------|--------|-------|
| 1  | 259.15   | 130.08   | 242.13   | 121.57   |          |          | N   |          |        |          |        |          |        | 17    |
| 2  | 360.20   | 180.60   | 343.17   | 172.09   | 342.19   | 171.60   | T   | 1,958.89 | 979.95 | 1,941.86 | 971.43 | 1,940.87 | 970.94 | 16    |
| 3  | 507.27   | 254.14   | 490.24   | 245.62   | 489.26   | 245.13   | F   | 1,857.84 | 929.42 | 1,840.81 | 920.91 | 1,839.83 | 920.42 | 15    |
| 4  | 693.35   | 347.18   | 676.32   | 338.66   | 675.34   | 338.17   | W   | 1,710.77 | 855.89 | 1,693.74 | 847.38 | 1,692.76 | 846.88 | 14    |
| 5  | 808.37   | 404.69   | 791.35   | 396.18   | 790.36   | 395.69   | D   | 1,524.69 | 762.85 | 1,507.66 | 754.34 | 1,506.68 | 753.84 | 13    |
| 6  | 907.44   | 454.23   | 890.42   | 445.71   | 889.43   | 445.22   | V   | 1,409.66 | 705.34 | 1,392.64 | 696.82 | 1,391.65 | 696.33 | 12    |
| 7  | 1,022.47 | 511.74   | 1,005.44 | 503.23   | 1,004.46 | 502.73   | D   | 1,310.59 | 655.80 | 1,293.57 | 647.29 | 1,292.58 | 646.80 | 11    |
| 8  | 1,079.49 | 540.25   | 1,062.46 | 531.74   | 1,061.48 | 531.24   | G   | 1,195.57 | 598.29 | 1,178.54 | 589.77 | 1,177.56 | 589.28 | 10    |
| 9  | 1,166.52 | 583.77   | 1,149.50 | 575.25   | 1,148.51 | 574.76   | S   | 1,138.55 | 569.78 | 1,121.52 | 561.26 | 1,120.54 | 560.77 | 9     |
| 10 | 1,297.56 | 649.29   | 1,280.54 | 640.77   | 1,279.55 | 640.28   | M   | 1,051.51 | 526.26 | 1,034.49 | 517.75 | 1,033.50 | 517.26 | 8     |
| 11 | 1,396.63 | 698.82   | 1,379.61 | 690.31   | 1,378.62 | 689.81   | V   | 920.47   | 460.74 | 903.45   | 452.23 | 902.46   | 451.74 | 7     |
| 12 | 1,493.69 | 747.35   | 1,476.66 | 738.83   | 1,475.67 | 738.34   | P   | 821.41   | 411.21 | 804.38   | 402.69 | 803.39   | 402.20 | 6     |
| 13 | 1,590.74 | 795.87   | 1,573.71 | 787.36   | 1,572.73 | 786.87   | P   | 724.35   | 362.68 | 707.33   | 354.17 | 706.34   | 353.67 | 5     |
| 14 | 1,719.78 | 860.39   | 1,702.75 | 851.88   | 1,701.77 | 851.39   | E   | 627.30   | 314.15 | 610.27   | 305.64 | 609.29   | 305.15 | 4     |
| 15 | 1,905.86 | 953.43   | 1,888.83 | 944.92   | 1,887.85 | 944.43   | W   | 498.26   | 249.63 | 481.23   | 241.12 |          |        | 3     |
| 16 | 2,042.92 | 1,021.96 | 2,025.89 | 1,013.45 | 2,024.91 | 1,012.96 | H   | 312.18   | 156.59 | 295.15   | 148.08 |          |        | 2     |



|    |          |          |          |          |          |          |   |          |        |          |        |          |        |   |
|----|----------|----------|----------|----------|----------|----------|---|----------|--------|----------|--------|----------|--------|---|
| 13 | 1,439.76 | 720.38   | 1,422.73 | 711.87   | 1,421.75 | 711.38   | Q | 1,104.65 | 552.83 | 1,087.63 | 544.32 | 1,086.64 | 543.83 | 8 |
| 14 | 1,625.84 | 813.42   | 1,608.81 | 804.91   | 1,607.83 | 804.42   | W | 976.59   | 488.80 | 959.57   | 480.29 | 958.58   | 479.80 | 7 |
| 15 | 1,738.92 | 869.97   | 1,721.90 | 861.45   | 1,720.91 | 860.96   | L | 790.52   | 395.76 | 773.49   | 387.25 | 772.50   | 386.76 | 6 |
| 16 | 1,852.01 | 926.51   | 1,834.98 | 917.99   | 1,834.00 | 917.50   | L | 677.43   | 339.22 | 660.40   | 330.71 | 659.42   | 330.21 | 5 |
| 17 | 1,953.06 | 977.03   | 1,936.03 | 968.52   | 1,935.05 | 968.03   | T | 564.35   | 282.68 | 547.32   | 274.16 | 546.34   | 273.67 | 4 |
| 18 | 2,054.10 | 1,027.56 | 2,037.08 | 1,019.04 | 2,036.09 | 1,018.55 | T | 463.30   | 232.15 | 446.27   | 223.64 | 445.29   | 223.15 | 3 |
| 19 | 2,125.14 | 1,063.07 | 2,108.11 | 1,054.56 | 2,107.13 | 1,054.07 | A | 362.25   | 181.63 | 345.23   | 173.12 |          |        | 2 |
| 20 |          |          |          |          |          |          | K | 291.21   | 146.11 | 274.19   | 137.60 |          |        | 1 |

Query 89707 Hit 1

MS/MS Fragmentation of **LHGGTPANFLDVGGGATVHQVTEAFK**

Found in **sp|Q9P2R7|SUCB1\_HUMAN**, Succinyl-CoA ligase [ADP-forming] subunit beta

Match to Query 89707: 2910.527from(728.639,4+)

Title: 529: Scan 1782 (rt=47.6093, f=2, i=321) [D:\lab212\membrane\Grace\Joyce\iTRAQ\_46\_1.raw]

Data File: Submitted from 20120508-1(merge) by Mascot Daemon on JOYCE-VAIO

Monoisotopic mass of neutral peptide Mr(calc): 2910.527

Variable modifications:

K26 iTRAQ4plex (K)

Ions Score: 77.71 Expect: 0.000

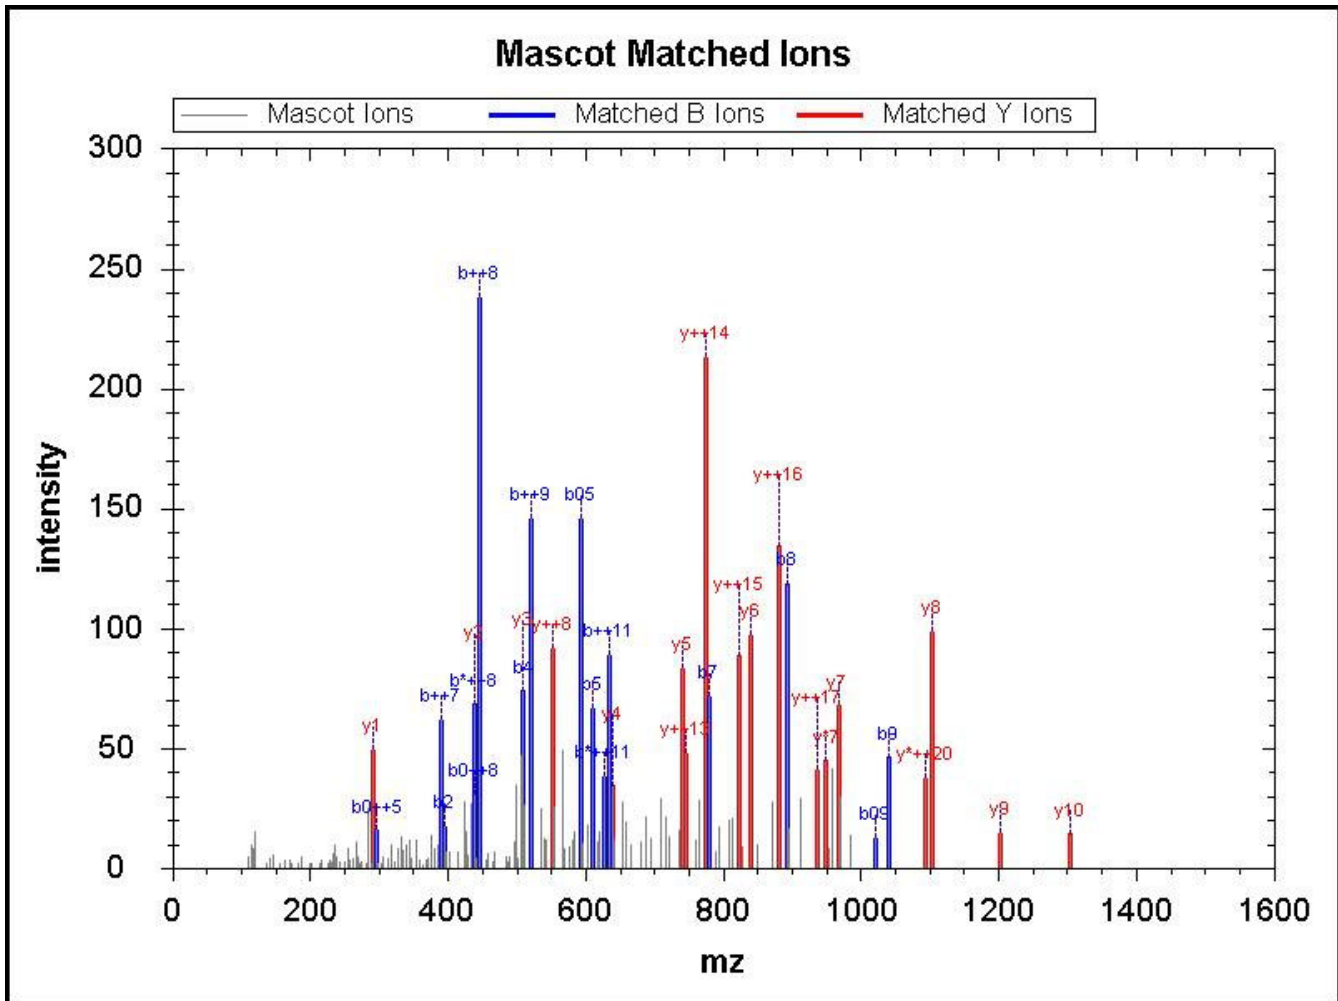

| No | b      | b++    | b* | b*++ | b0     | b0++   | Seq | y        | y++      | y*       | y*++     | y0       | y0++     | RevNo |
|----|--------|--------|----|------|--------|--------|-----|----------|----------|----------|----------|----------|----------|-------|
| 1  | 258.19 | 129.60 |    |      |        |        | L   |          |          |          |          |          |          | 26    |
| 2  | 395.25 | 198.13 |    |      |        |        | H   | 2,654.34 | 1,327.68 | 2,637.32 | 1,319.16 | 2,636.33 | 1,318.67 | 25    |
| 3  | 452.27 | 226.64 |    |      |        |        | G   | 2,517.29 | 1,259.15 | 2,500.26 | 1,250.63 | 2,499.27 | 1,250.14 | 24    |
| 4  | 509.30 | 255.15 |    |      |        |        | G   | 2,460.26 | 1,230.64 | 2,443.24 | 1,222.12 | 2,442.25 | 1,221.63 | 23    |
| 5  | 610.34 | 305.68 |    |      | 592.33 | 296.67 | T   | 2,403.24 | 1,202.12 | 2,386.22 | 1,193.61 | 2,385.23 | 1,193.12 | 22    |
| 6  | 707.40 | 354.20 |    |      | 689.39 | 345.20 | P   | 2,302.19 | 1,151.60 | 2,285.17 | 1,143.09 | 2,284.18 | 1,142.60 | 21    |

|    |          |          |          |          |          |          |   |          |          |          |          |          |          |    |
|----|----------|----------|----------|----------|----------|----------|---|----------|----------|----------|----------|----------|----------|----|
| 7  | 778.43   | 389.72   |          |          | 760.42   | 380.71   | A | 2,205.14 | 1,103.07 | 2,188.12 | 1,094.56 | 2,187.13 | 1,094.07 | 20 |
| 8  | 892.48   | 446.74   | 875.45   | 438.23   | 874.47   | 437.74   | N | 2,134.10 | 1,067.56 | 2,117.08 | 1,059.04 | 2,116.09 | 1,058.55 | 19 |
| 9  | 1,039.54 | 520.28   | 1,022.52 | 511.76   | 1,021.53 | 511.27   | F | 2,020.06 | 1,010.53 | 2,003.04 | 1,002.02 | 2,002.05 | 1,001.53 | 18 |
| 10 | 1,152.63 | 576.82   | 1,135.60 | 568.30   | 1,134.62 | 567.81   | L | 1,872.99 | 937.00   | 1,855.97 | 928.49   | 1,854.98 | 928.00   | 17 |
| 11 | 1,267.66 | 634.33   | 1,250.63 | 625.82   | 1,249.64 | 625.33   | D | 1,759.91 | 880.46   | 1,742.88 | 871.95   | 1,741.90 | 871.45   | 16 |
| 12 | 1,366.72 | 683.87   | 1,349.70 | 675.35   | 1,348.71 | 674.86   | V | 1,644.88 | 822.94   | 1,627.86 | 814.43   | 1,626.87 | 813.94   | 15 |
| 13 | 1,423.75 | 712.38   | 1,406.72 | 703.86   | 1,405.73 | 703.37   | G | 1,545.81 | 773.41   | 1,528.79 | 764.90   | 1,527.80 | 764.41   | 14 |
| 14 | 1,480.77 | 740.89   | 1,463.74 | 732.37   | 1,462.76 | 731.88   | G | 1,488.79 | 744.90   | 1,471.77 | 736.39   | 1,470.78 | 735.89   | 13 |
| 15 | 1,537.79 | 769.40   | 1,520.76 | 760.88   | 1,519.78 | 760.39   | G | 1,431.77 | 716.39   | 1,414.74 | 707.88   | 1,413.76 | 707.38   | 12 |
| 16 | 1,608.83 | 804.92   | 1,591.80 | 796.40   | 1,590.81 | 795.91   | A | 1,374.75 | 687.88   | 1,357.72 | 679.37   | 1,356.74 | 678.87   | 11 |
| 17 | 1,709.87 | 855.44   | 1,692.85 | 846.93   | 1,691.86 | 846.43   | T | 1,303.71 | 652.36   | 1,286.69 | 643.85   | 1,285.70 | 643.35   | 10 |
| 18 | 1,808.94 | 904.97   | 1,791.91 | 896.46   | 1,790.93 | 895.97   | V | 1,202.66 | 601.84   | 1,185.64 | 593.32   | 1,184.65 | 592.83   | 9  |
| 19 | 1,946.00 | 973.50   | 1,928.97 | 964.99   | 1,927.99 | 964.50   | H | 1,103.60 | 552.30   | 1,086.57 | 543.79   | 1,085.59 | 543.30   | 8  |
| 20 | 2,074.06 | 1,037.53 | 2,057.03 | 1,029.02 | 2,056.05 | 1,028.53 | Q | 966.54   | 483.77   | 949.51   | 475.26   | 948.53   | 474.77   | 7  |
| 21 | 2,173.13 | 1,087.07 | 2,156.10 | 1,078.55 | 2,155.12 | 1,078.06 | V | 838.48   | 419.74   | 821.45   | 411.23   | 820.47   | 410.74   | 6  |
| 22 | 2,274.17 | 1,137.59 | 2,257.15 | 1,129.08 | 2,256.16 | 1,128.59 | T | 739.41   | 370.21   | 722.38   | 361.70   | 721.40   | 361.20   | 5  |
| 23 | 2,403.22 | 1,202.11 | 2,386.19 | 1,193.60 | 2,385.21 | 1,193.11 | E | 638.36   | 319.69   | 621.34   | 311.17   | 620.35   | 310.68   | 4  |
| 24 | 2,474.25 | 1,237.63 | 2,457.23 | 1,229.12 | 2,456.24 | 1,228.63 | A | 509.32   | 255.16   | 492.29   | 246.65   |          |          | 3  |
| 25 | 2,621.32 | 1,311.17 | 2,604.30 | 1,302.65 | 2,603.31 | 1,302.16 | F | 438.28   | 219.65   | 421.26   | 211.13   |          |          | 2  |
| 26 |          |          |          |          |          |          | K | 291.21   | 146.11   | 274.19   | 137.60   |          |          | 1  |

Query 85540 Hit 1

MS/MS Fragmentation of **DG~~N~~L~~P~~D~~I~~V~~N~~S~~G~~S~~L~~H~~E~~F~~L~~V~~N~~L~~H~~E~~R~~**

Found in **sp|Q6UW02|CP20A\_HUMAN**, Cytochrome P450 20A1 OS=Homo sapiens GN=CYP20A1 PE=1 SV=1

Match to Query 85540: 2718.386from(680.6038,4+)

Title: 935: Sum of 2 scans in range 2061 (rt=56.0249, f=4, i=628) to 2062 (rt=56.0504, f=4, i=629)

[D:\lab212\membrane\Grace\Joyce\iTRAQ\_44\_1.raw]

Data File: Submitted from 20120508-1(merge) by Mascot Daemon on JOYCE-VAIO

Monoisotopic mass of neutral peptide Mr(calc): 2718.386

Variable modifications:

Ions Score: 77.63 Expect: 0.000



### Mascot Matched Ions

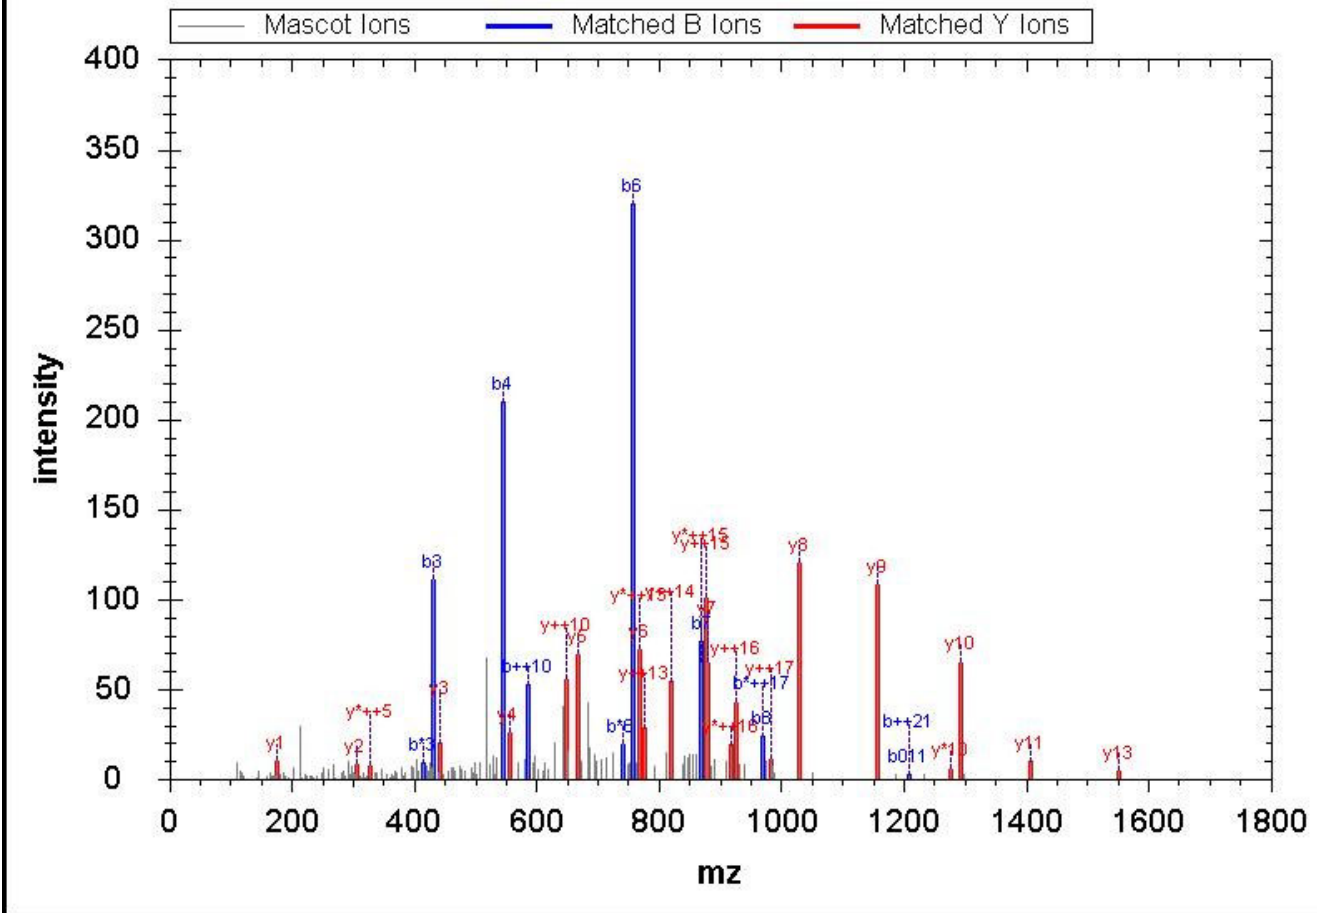

| No | b        | b++      | b*       | b*++     | b0       | b0++     | Seq | y        | y++      | y*       | y*++     | y0       | y0++     | RevNo |
|----|----------|----------|----------|----------|----------|----------|-----|----------|----------|----------|----------|----------|----------|-------|
| 1  | 260.14   | 130.57   |          |          | 242.13   | 121.57   | D   |          |          |          |          |          |          | 23    |
| 2  | 317.16   | 159.08   |          |          | 299.15   | 150.08   | G   | 2,460.26 | 1,230.64 | 2,443.24 | 1,222.12 | 2,442.25 | 1,221.63 | 22    |
| 3  | 431.20   | 216.10   | 414.17   | 207.59   | 413.19   | 207.10   | N   | 2,403.24 | 1,202.12 | 2,386.21 | 1,193.61 | 2,385.23 | 1,193.12 | 21    |
| 4  | 544.28   | 272.65   | 527.26   | 264.13   | 526.27   | 263.64   | L   | 2,289.20 | 1,145.10 | 2,272.17 | 1,136.59 | 2,271.19 | 1,136.10 | 20    |
| 5  | 641.34   | 321.17   | 624.31   | 312.66   | 623.33   | 312.17   | P   | 2,176.11 | 1,088.56 | 2,159.09 | 1,080.05 | 2,158.10 | 1,079.56 | 19    |
| 6  | 756.36   | 378.69   | 739.34   | 370.17   | 738.35   | 369.68   | D   | 2,079.06 | 1,040.03 | 2,062.04 | 1,031.52 | 2,061.05 | 1,031.03 | 18    |
| 7  | 869.45   | 435.23   | 852.42   | 426.71   | 851.44   | 426.22   | I   | 1,964.03 | 982.52   | 1,947.01 | 974.01   | 1,946.02 | 973.52   | 17    |
| 8  | 968.52   | 484.76   | 951.49   | 476.25   | 950.51   | 475.76   | V   | 1,850.95 | 925.98   | 1,833.92 | 917.47   | 1,832.94 | 916.97   | 16    |
| 9  | 1,082.56 | 541.78   | 1,065.53 | 533.27   | 1,064.55 | 532.78   | N   | 1,751.88 | 876.44   | 1,734.86 | 867.93   | 1,733.87 | 867.44   | 15    |
| 10 | 1,169.59 | 585.30   | 1,152.57 | 576.79   | 1,151.58 | 576.29   | S   | 1,637.84 | 819.42   | 1,620.81 | 810.91   | 1,619.83 | 810.42   | 14    |
| 11 | 1,226.61 | 613.81   | 1,209.59 | 605.30   | 1,208.60 | 604.80   | G   | 1,550.81 | 775.91   | 1,533.78 | 767.39   | 1,532.80 | 766.90   | 13    |
| 12 | 1,313.65 | 657.33   | 1,296.62 | 648.81   | 1,295.63 | 648.32   | S   | 1,493.79 | 747.40   | 1,476.76 | 738.88   | 1,475.78 | 738.39   | 12    |
| 13 | 1,426.73 | 713.87   | 1,409.70 | 705.36   | 1,408.72 | 704.86   | L   | 1,406.75 | 703.88   | 1,389.73 | 695.37   | 1,388.74 | 694.88   | 11    |
| 14 | 1,563.79 | 782.40   | 1,546.76 | 773.88   | 1,545.78 | 773.39   | H   | 1,293.67 | 647.34   | 1,276.64 | 638.83   | 1,275.66 | 638.33   | 10    |
| 15 | 1,692.83 | 846.92   | 1,675.80 | 838.41   | 1,674.82 | 837.91   | E   | 1,156.61 | 578.81   | 1,139.58 | 570.30   | 1,138.60 | 569.80   | 9     |
| 16 | 1,839.90 | 920.45   | 1,822.87 | 911.94   | 1,821.89 | 911.45   | F   | 1,027.57 | 514.29   | 1,010.54 | 505.77   | 1,009.56 | 505.28   | 8     |
| 17 | 1,952.98 | 977.00   | 1,935.96 | 968.48   | 1,934.97 | 967.99   | L   | 880.50   | 440.75   | 863.47   | 432.24   | 862.49   | 431.75   | 7     |
| 18 | 2,052.05 | 1,026.53 | 2,035.03 | 1,018.02 | 2,034.04 | 1,017.52 | V   | 767.42   | 384.21   | 750.39   | 375.70   | 749.41   | 375.21   | 6     |
| 19 | 2,166.09 | 1,083.55 | 2,149.07 | 1,075.04 | 2,148.08 | 1,074.55 | N   | 668.35   | 334.68   | 651.32   | 326.16   | 650.34   | 325.67   | 5     |
| 20 | 2,279.18 | 1,140.09 | 2,262.15 | 1,131.58 | 2,261.17 | 1,131.09 | L   | 554.30   | 277.66   | 537.28   | 269.14   | 536.29   | 268.65   | 4     |
| 21 | 2,416.24 | 1,208.62 | 2,399.21 | 1,200.11 | 2,398.23 | 1,199.62 | H   | 441.22   | 221.11   | 424.19   | 212.60   | 423.21   | 212.11   | 3     |
| 22 | 2,545.28 | 1,273.14 | 2,528.25 | 1,264.63 | 2,527.27 | 1,264.14 | E   | 304.16   | 152.58   | 287.13   | 144.07   | 286.15   | 143.58   | 2     |
| 23 |          |          |          |          |          |          | R   | 175.12   | 88.06    | 158.09   | 79.55    |          |          | 1     |

Query 37126 Hit 1

MS/MS Fragmentation of **TLAYIITELDER**

Found in **sp|Q9Y5K8|VATD\_HUMAN**, V-type proton ATPase subunit D OS=Homo sapiens GN=ATP6V1D PE=1 SV=1

Match to Query 37126: 1579.856from(790.9355,2+)

Title: 735: Sum of 2 scans in range 2462 (rt=62.8229, f=3, i=331) to 2463 (rt=62.8483, f=3, i=332)

[D:\lab212\membrane\Grace\Joyce\iTRAQ19.raw]

Data File: Submitted from 20120508-1(merge) by Mascot Daemon on JOYCE-VAIO

Monoisotopic mass of neutral peptide Mr(calc): 1579.856

Variable modifications:

Ions Score: 77.57 Expect: 0.000

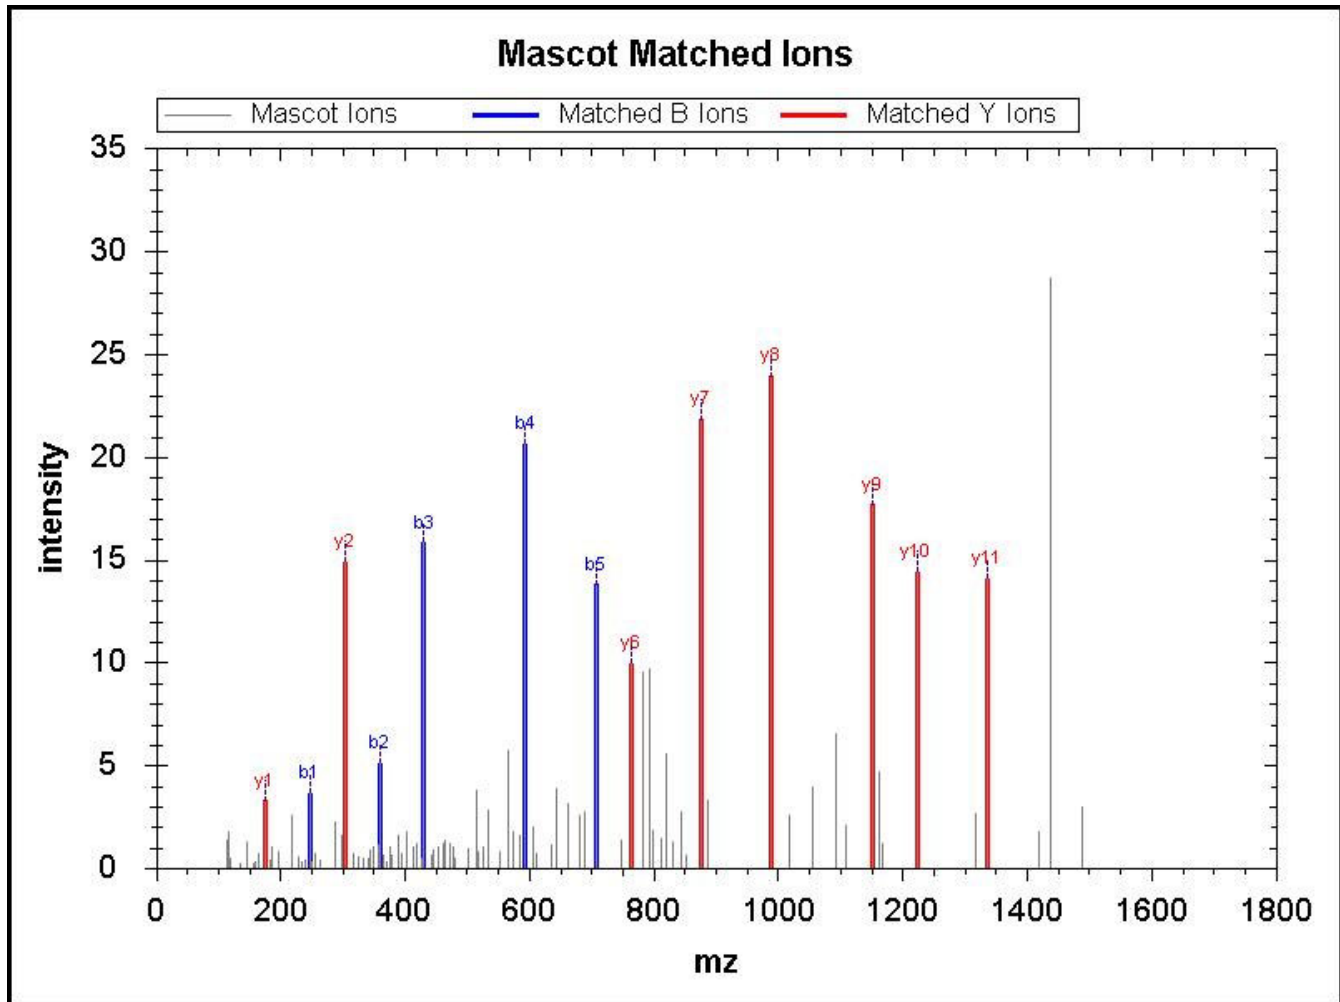

| No | b        | b++    | b0       | b0++   | Seq | y        | y++    | y*       | y*++   | y0       | y0++   | RevNo |
|----|----------|--------|----------|--------|-----|----------|--------|----------|--------|----------|--------|-------|
| 1  | 246.16   | 123.58 | 228.15   | 114.58 | T   |          |        |          |        |          |        | 12    |
| 2  | 359.24   | 180.12 | 341.23   | 171.12 | L   | 1,335.72 | 668.36 | 1,318.69 | 659.85 | 1,317.70 | 659.36 | 11    |
| 3  | 430.28   | 215.64 | 412.27   | 206.64 | A   | 1,222.63 | 611.82 | 1,205.60 | 603.31 | 1,204.62 | 602.81 | 10    |
| 4  | 593.34   | 297.17 | 575.33   | 288.17 | Y   | 1,151.59 | 576.30 | 1,134.57 | 567.79 | 1,133.58 | 567.30 | 9     |
| 5  | 706.43   | 353.72 | 688.41   | 344.71 | I   | 988.53   | 494.77 | 971.50   | 486.26 | 970.52   | 485.76 | 8     |
| 6  | 819.51   | 410.26 | 801.50   | 401.25 | I   | 875.45   | 438.23 | 858.42   | 429.71 | 857.44   | 429.22 | 7     |
| 7  | 920.56   | 460.78 | 902.55   | 451.78 | T   | 762.36   | 381.69 | 745.34   | 373.17 | 744.35   | 372.68 | 6     |
| 8  | 1,049.60 | 525.30 | 1,031.59 | 516.30 | E   | 661.32   | 331.16 | 644.29   | 322.65 | 643.30   | 322.16 | 5     |
| 9  | 1,162.68 | 581.85 | 1,144.67 | 572.84 | L   | 532.27   | 266.64 | 515.25   | 258.13 | 514.26   | 257.63 | 4     |
| 10 | 1,277.71 | 639.36 | 1,259.70 | 630.35 | D   | 419.19   | 210.10 | 402.16   | 201.58 | 401.18   | 201.09 | 3     |
| 11 | 1,406.75 | 703.88 | 1,388.74 | 694.88 | E   | 304.16   | 152.58 | 287.13   | 144.07 | 286.15   | 143.58 | 2     |
| 12 |          |        |          |        | R   | 175.12   | 88.06  | 158.09   | 79.55  |          |        | 1     |

Query 88288 Hit 1

MS/MS Fragmentation of **EIENMILNDPDFQHEDLNFLTR**

Found in [sp|Q15067|ACOX1\\_HUMAN](#), Peroxisomal acyl-coenzyme A oxidase 1 OS=Homo sapiens GN=ACOX1 PE=1 SV=3  
 Match to Query 88288: 2846.373from(949.7982,3+)  
 Title: 927: Scan 2115 (rt=56.8103, f=3, i=314) [D:\lab212\membrane\Grace\Joyce\iTRAQ\_30\_1.raw]  
 Data File:Submitted from 20120508-1(merge) by Mascot Daemon on JOYCE-VAIO  
 Monoisotopic mass of neutral peptide Mr(calc): 2846.373  
 Variable modifications:  
 Ions Score: 76.94 Expect: 0.000

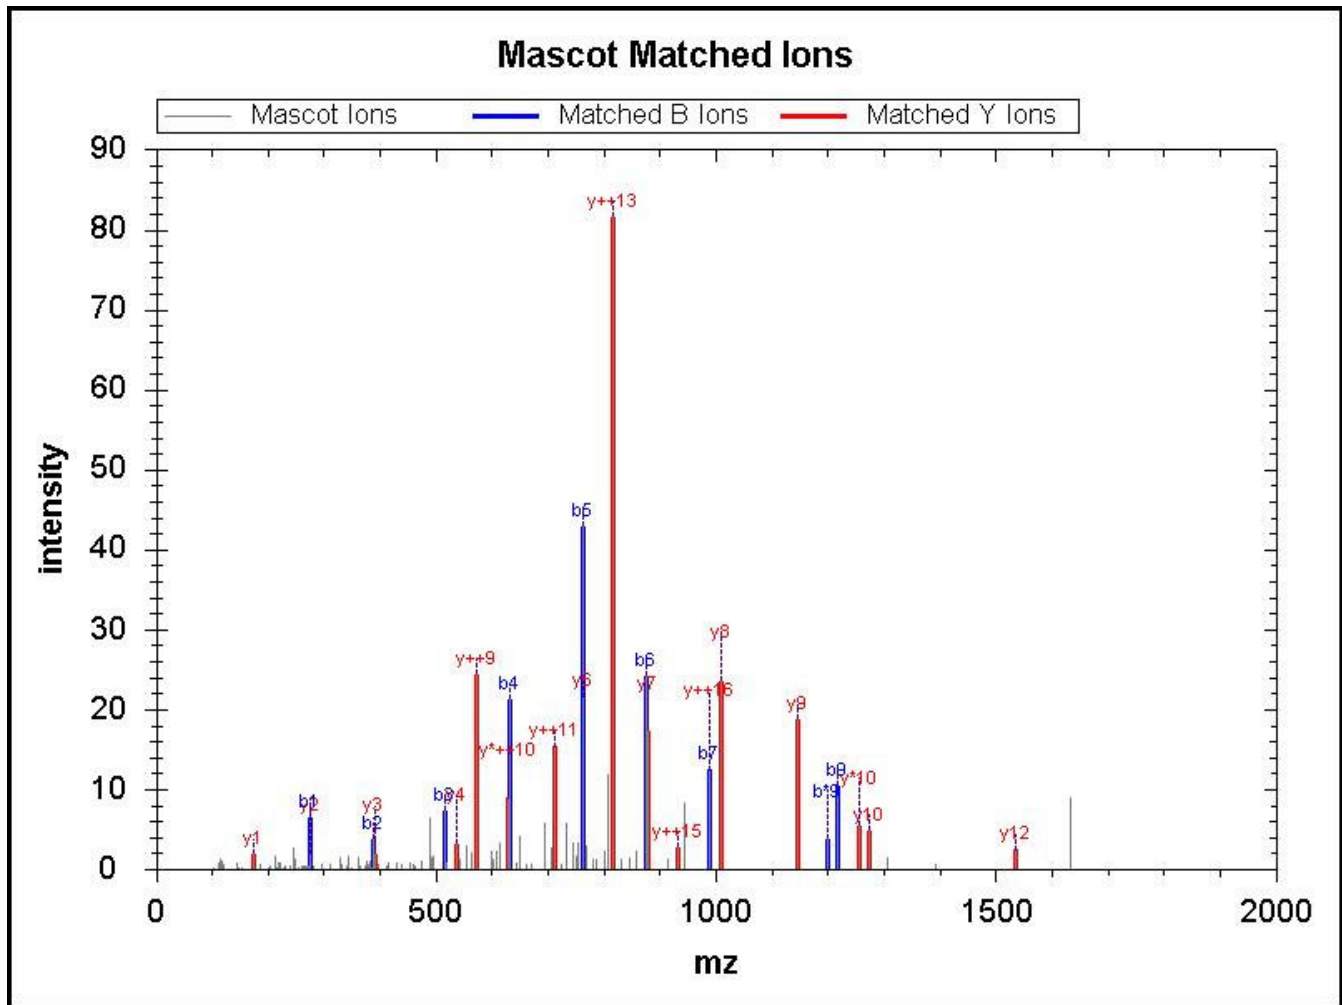

| No | b        | b++      | b*       | b*++     | b0       | b0++     | Seq | y        | y++      | y*       | y*++     | y0       | y0++     | RevNo |
|----|----------|----------|----------|----------|----------|----------|-----|----------|----------|----------|----------|----------|----------|-------|
| 1  | 274.15   | 137.58   |          |          | 256.14   | 128.57   | E   |          |          |          |          |          |          | 22    |
| 2  | 387.24   | 194.12   |          |          | 369.23   | 185.12   | I   | 2,574.23 | 1,287.62 | 2,557.20 | 1,279.10 | 2,556.22 | 1,278.61 | 21    |
| 3  | 516.28   | 258.64   |          |          | 498.27   | 249.64   | E   | 2,461.15 | 1,231.08 | 2,444.12 | 1,222.56 | 2,443.13 | 1,222.07 | 20    |
| 4  | 630.32   | 315.66   | 613.29   | 307.15   | 612.31   | 306.66   | N   | 2,332.10 | 1,166.56 | 2,315.08 | 1,158.04 | 2,314.09 | 1,157.55 | 19    |
| 5  | 761.36   | 381.18   | 744.34   | 372.67   | 743.35   | 372.18   | M   | 2,218.06 | 1,109.53 | 2,201.03 | 1,101.02 | 2,200.05 | 1,100.53 | 18    |
| 6  | 874.45   | 437.73   | 857.42   | 429.21   | 856.44   | 428.72   | I   | 2,087.02 | 1,044.01 | 2,069.99 | 1,035.50 | 2,069.01 | 1,035.01 | 17    |
| 7  | 987.53   | 494.27   | 970.50   | 485.76   | 969.52   | 485.26   | L   | 1,973.94 | 987.47   | 1,956.91 | 978.96   | 1,955.92 | 978.47   | 16    |
| 8  | 1,101.57 | 551.29   | 1,084.55 | 542.78   | 1,083.56 | 542.28   | N   | 1,860.85 | 930.93   | 1,843.82 | 922.42   | 1,842.84 | 921.92   | 15    |
| 9  | 1,216.60 | 608.80   | 1,199.57 | 600.29   | 1,198.59 | 599.80   | D   | 1,746.81 | 873.91   | 1,729.78 | 865.39   | 1,728.80 | 864.90   | 14    |
| 10 | 1,313.65 | 657.33   | 1,296.63 | 648.82   | 1,295.64 | 648.32   | P   | 1,631.78 | 816.39   | 1,614.75 | 807.88   | 1,613.77 | 807.39   | 13    |
| 11 | 1,428.68 | 714.84   | 1,411.65 | 706.33   | 1,410.67 | 705.84   | D   | 1,534.73 | 767.87   | 1,517.70 | 759.35   | 1,516.72 | 758.86   | 12    |
| 12 | 1,575.75 | 788.38   | 1,558.72 | 779.86   | 1,557.74 | 779.37   | F   | 1,419.70 | 710.35   | 1,402.67 | 701.84   | 1,401.69 | 701.35   | 11    |
| 13 | 1,703.81 | 852.41   | 1,686.78 | 843.89   | 1,685.80 | 843.40   | Q   | 1,272.63 | 636.82   | 1,255.61 | 628.31   | 1,254.62 | 627.81   | 10    |
| 14 | 1,840.87 | 920.94   | 1,823.84 | 912.42   | 1,822.85 | 911.93   | H   | 1,144.57 | 572.79   | 1,127.55 | 564.28   | 1,126.56 | 563.79   | 9     |
| 15 | 1,969.91 | 985.46   | 1,952.88 | 976.94   | 1,951.90 | 976.45   | E   | 1,007.52 | 504.26   | 990.49   | 495.75   | 989.51   | 495.26   | 8     |
| 16 | 2,084.94 | 1,042.97 | 2,067.91 | 1,034.46 | 2,066.92 | 1,033.97 | D   | 878.47   | 439.74   | 861.45   | 431.23   | 860.46   | 430.73   | 7     |
| 17 | 2,198.02 | 1,099.51 | 2,180.99 | 1,091.00 | 2,180.01 | 1,090.51 | L   | 763.45   | 382.23   | 746.42   | 373.71   | 745.44   | 373.22   | 6     |
| 18 | 2,312.06 | 1,156.53 | 2,295.04 | 1,148.02 | 2,294.05 | 1,147.53 | N   | 650.36   | 325.68   | 633.34   | 317.17   | 632.35   | 316.68   | 5     |

|    |          |          |          |          |          |          |   |        |        |        |        |        |        |   |
|----|----------|----------|----------|----------|----------|----------|---|--------|--------|--------|--------|--------|--------|---|
| 19 | 2,459.13 | 1,230.07 | 2,442.10 | 1,221.56 | 2,441.12 | 1,221.06 | F | 536.32 | 268.66 | 519.29 | 260.15 | 518.31 | 259.66 | 4 |
| 20 | 2,572.21 | 1,286.61 | 2,555.19 | 1,278.10 | 2,554.20 | 1,277.61 | L | 389.25 | 195.13 | 372.22 | 186.62 | 371.24 | 186.12 | 3 |
| 21 | 2,673.26 | 1,337.13 | 2,656.24 | 1,328.62 | 2,655.25 | 1,328.13 | T | 276.17 | 138.59 | 259.14 | 130.07 | 258.16 | 129.58 | 2 |
| 22 |          |          |          |          |          |          | R | 175.12 | 88.06  | 158.09 | 79.55  |        |        | 1 |

Query 41527 Hit 1

MS/MS Fragmentation of **LEDILESINSIK**

Found in **sp|Q9Y3A6|TMED5\_HUMAN**, Transmembrane emp24 domain-containing protein 5 OS=Homo sapiens GN=TMED5 PE=1 SV=1

Match to Query 41527: 1660.946from(831.4803,2+)

Title: 1020: Sum of 2 scans in range 2232 (rt=59.7608, f=4, i=683) to 2233 (rt=59.7862, f=4, i=684)

[D:\lab212\membrane\Grace\Joyce\iTRAQ\_28\_2\_327.raw]

Data File: Submitted from 20120508-1(merge) by Mascot Daemon on JOYCE-VAIO

Monoisotopic mass of neutral peptide Mr(calc): 1660.946

Variable modifications:

K12 iTRAQ4plex (K)

Ions Score: 76.82 Expect: 0.000

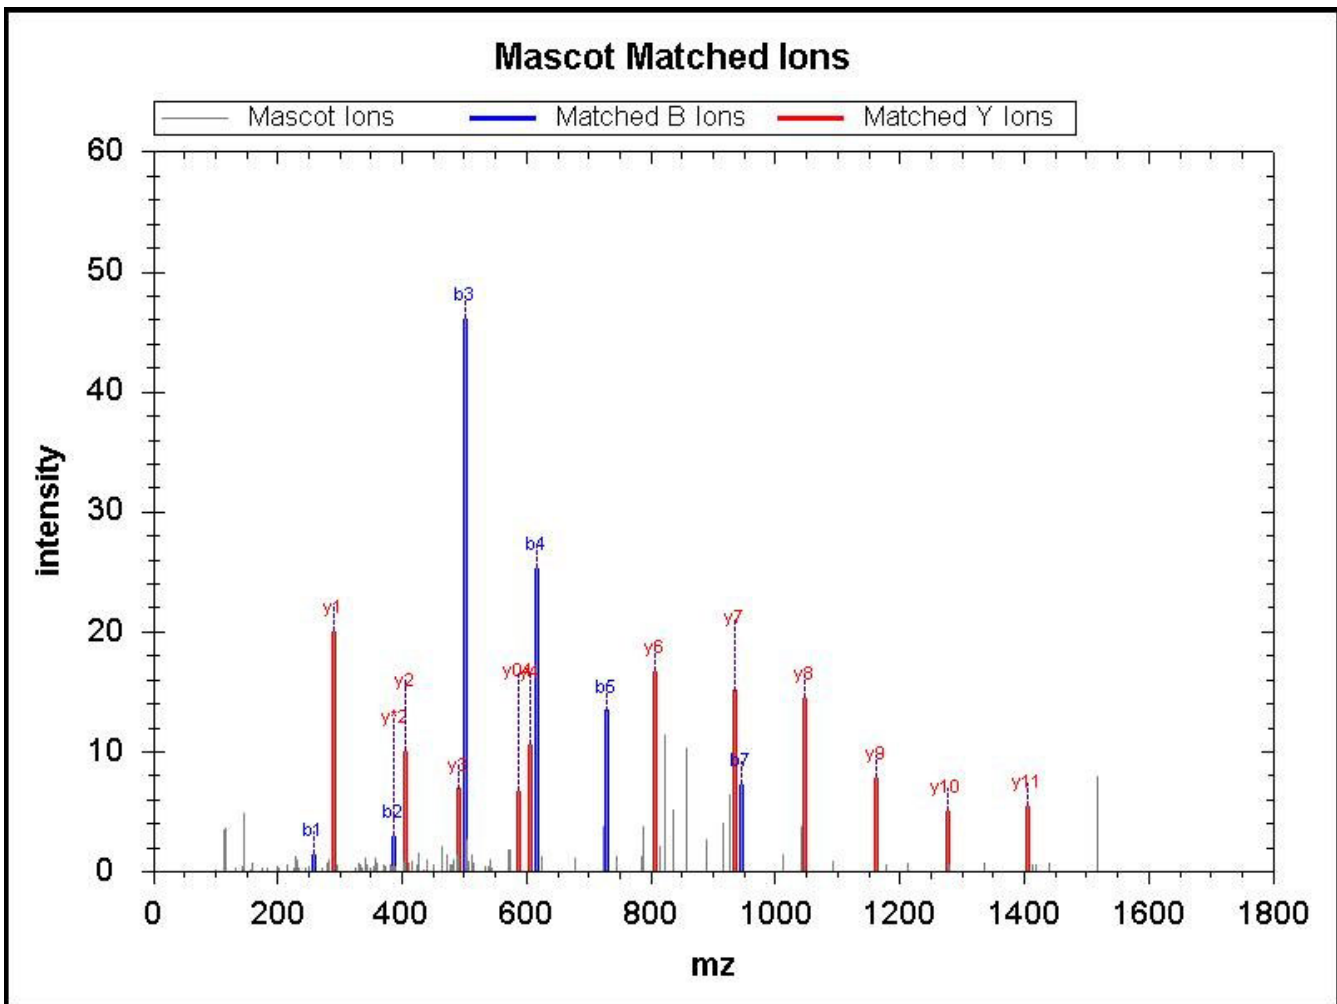

| No | b        | b++    | b*       | b*++   | b0       | b0++   | Seq | y        | y++    | y*       | y*++   | y0       | y0++   | RevNo |
|----|----------|--------|----------|--------|----------|--------|-----|----------|--------|----------|--------|----------|--------|-------|
| 1  | 258.19   | 129.60 |          |        |          |        | L   |          |        |          |        |          |        | 12    |
| 2  | 387.24   | 194.12 |          |        | 369.23   | 185.12 | E   | 1,404.77 | 702.89 | 1,387.74 | 694.38 | 1,386.76 | 693.88 | 11    |
| 3  | 502.26   | 251.64 |          |        | 484.25   | 242.63 | D   | 1,275.73 | 638.37 | 1,258.70 | 629.85 | 1,257.72 | 629.36 | 10    |
| 4  | 615.35   | 308.18 |          |        | 597.34   | 299.17 | I   | 1,160.70 | 580.85 | 1,143.67 | 572.34 | 1,142.69 | 571.85 | 9     |
| 5  | 728.43   | 364.72 |          |        | 710.42   | 355.71 | L   | 1,047.62 | 524.31 | 1,030.59 | 515.80 | 1,029.61 | 515.31 | 8     |
| 6  | 857.47   | 429.24 |          |        | 839.46   | 420.24 | E   | 934.53   | 467.77 | 917.51   | 459.26 | 916.52   | 458.76 | 7     |
| 7  | 944.51   | 472.76 |          |        | 926.50   | 463.75 | S   | 805.49   | 403.25 | 788.46   | 394.74 | 787.48   | 394.24 | 6     |
| 8  | 1,057.59 | 529.30 |          |        | 1,039.58 | 520.29 | I   | 718.46   | 359.73 | 701.43   | 351.22 | 700.45   | 350.73 | 5     |
| 9  | 1,171.63 | 586.32 | 1,154.61 | 577.81 | 1,153.62 | 577.31 | N   | 605.37   | 303.19 | 588.35   | 294.68 | 587.36   | 294.19 | 4     |

|    |          |        |          |        |          |        |   |        |        |        |        |        |        |   |
|----|----------|--------|----------|--------|----------|--------|---|--------|--------|--------|--------|--------|--------|---|
| 10 | 1,258.66 | 629.84 | 1,241.64 | 621.32 | 1,240.65 | 620.83 | S | 491.33 | 246.17 | 474.30 | 237.66 | 473.32 | 237.16 | 3 |
| 11 | 1,371.75 | 686.38 | 1,354.72 | 677.86 | 1,353.74 | 677.37 | I | 404.30 | 202.65 | 387.27 | 194.14 |        |        | 2 |
| 12 |          |        |          |        |          |        | K | 291.21 | 146.11 | 274.19 | 137.60 |        |        | 1 |

Query 66321 Hit 1

MS/MS Fragmentation of **ILDSFAAAPVPTTTLVLK**

Found in **sp|P18583|SON\_HUMAN**, Protein SON OS=Homo sapiens GN=SON PE=1 SV=4

Match to Query 66321: 2144.268 from (715.7632, 3+)

Title: 711: Scan 2213 (rt=56.0954, f=3, i=231) [D:\lab212\membrane\Grace\Joyce\iTRAQ\_24\_2.raw]

Data File: Submitted from 20120508-1(merge) by Mascot Daemon on JOYCE-VAIO

Monoisotopic mass of neutral peptide Mr(calc): 2144.268

Variable modifications:

K18 :iTRAQ4plex (K)

Ions Score: 76.43 Expect: 0.000

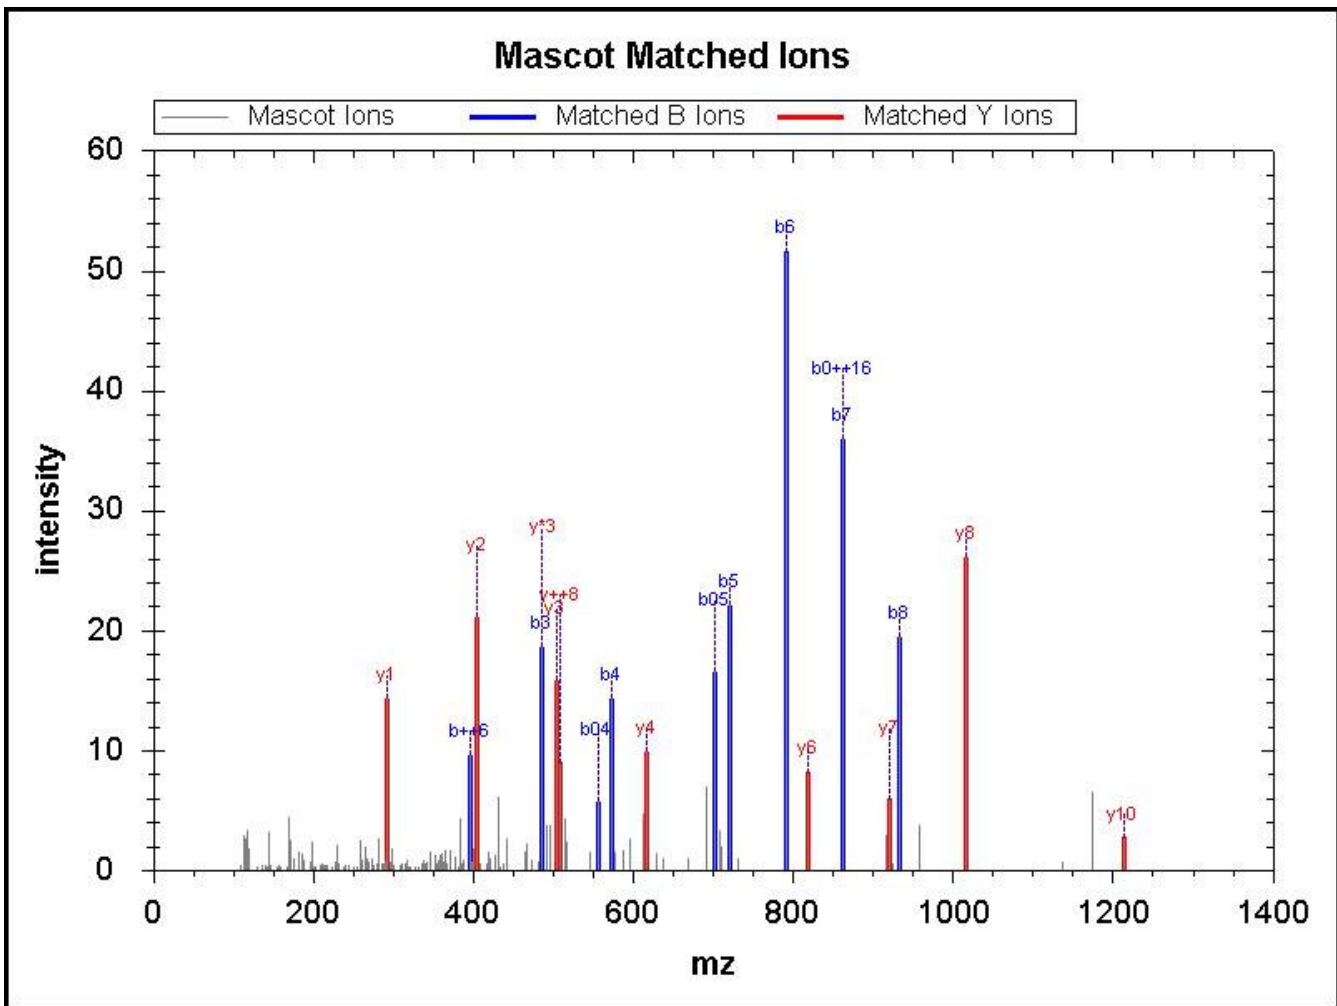

| No | b        | b++    | b0       | b0++   | Seq | y        | y++    | y*       | y*++   | y0       | y0++   | RevNo |
|----|----------|--------|----------|--------|-----|----------|--------|----------|--------|----------|--------|-------|
| 1  | 258.19   | 129.60 |          |        | I   |          |        |          |        |          |        | 18    |
| 2  | 371.28   | 186.14 |          |        | L   | 1,888.09 | 944.55 | 1,871.06 | 936.04 | 1,870.08 | 935.54 | 17    |
| 3  | 486.30   | 243.66 | 468.29   | 234.65 | D   | 1,775.01 | 888.01 | 1,757.98 | 879.49 | 1,757.00 | 879.00 | 16    |
| 4  | 573.34   | 287.17 | 555.33   | 278.17 | S   | 1,659.98 | 830.49 | 1,642.95 | 821.98 | 1,641.97 | 821.49 | 15    |
| 5  | 720.40   | 360.71 | 702.39   | 351.70 | F   | 1,572.95 | 786.98 | 1,555.92 | 778.46 | 1,554.94 | 777.97 | 14    |
| 6  | 791.44   | 396.22 | 773.43   | 387.22 | A   | 1,425.88 | 713.44 | 1,408.85 | 704.93 | 1,407.87 | 704.44 | 13    |
| 7  | 862.48   | 431.74 | 844.47   | 422.74 | A   | 1,354.84 | 677.92 | 1,337.82 | 669.41 | 1,336.83 | 668.92 | 12    |
| 8  | 933.52   | 467.26 | 915.51   | 458.26 | A   | 1,283.81 | 642.41 | 1,266.78 | 633.89 | 1,265.79 | 633.40 | 11    |
| 9  | 1,030.57 | 515.79 | 1,012.56 | 506.78 | P   | 1,212.77 | 606.89 | 1,195.74 | 598.37 | 1,194.76 | 597.88 | 10    |
| 10 | 1,129.64 | 565.32 | 1,111.63 | 556.32 | V   | 1,115.72 | 558.36 | 1,098.69 | 549.85 | 1,097.70 | 549.36 | 9     |
| 11 | 1,226.69 | 613.85 | 1,208.68 | 604.84 | P   | 1,016.65 | 508.83 | 999.62   | 500.31 | 998.64   | 499.82 | 8     |

|    |          |        |          |        |   |        |        |        |        |        |        |   |
|----|----------|--------|----------|--------|---|--------|--------|--------|--------|--------|--------|---|
| 12 | 1,327.74 | 664.37 | 1,309.73 | 655.37 | T | 919.59 | 460.30 | 902.57 | 451.79 | 901.58 | 451.30 | 7 |
| 13 | 1,428.79 | 714.90 | 1,410.77 | 705.89 | T | 818.55 | 409.78 | 801.52 | 401.26 | 800.54 | 400.77 | 6 |
| 14 | 1,529.83 | 765.42 | 1,511.82 | 756.41 | T | 717.50 | 359.25 | 700.47 | 350.74 | 699.49 | 350.25 | 5 |
| 15 | 1,642.92 | 821.96 | 1,624.91 | 812.96 | L | 616.45 | 308.73 | 599.42 | 300.22 |        |        | 4 |
| 16 | 1,741.99 | 871.50 | 1,723.98 | 862.49 | V | 503.37 | 252.19 | 486.34 | 243.67 |        |        | 3 |
| 17 | 1,855.07 | 928.04 | 1,837.06 | 919.03 | L | 404.30 | 202.65 | 387.27 | 194.14 |        |        | 2 |
| 18 |          |        |          |        | K | 291.21 | 146.11 | 274.19 | 137.60 |        |        | 1 |

Query 73795 Hit 1

MS/MS Fragmentation of **AQVLVEDISDILEEHAEK**

Found in **sp|Q5VV41|ARHGG\_HUMAN**, Rho guanine nucleotide exchange factor 16 OS=Homo sapiens GN=ARHGEF16 PE=1 SV=1  
Match to Query 73795: 2325.229from(776.0835,3+)

Title: 1057: Sum of 2 scans in range 2325 (rt=61.764, f=4, i=707) to 2326 (rt=61.7894, f=4, i=708)

[D:\lab212\membrane\GraceJoyce\iTRAQ\_35\_1.raw]

Data File: Submitted from 20120508-1(merge) by Mascot Daemon on JOYCE-VAIO

Monoisotopic mass of neutral peptide Mr(calc): 2325.229

Variable modifications:

K18 :iTRAQ4plex (K)

Ions Score: 76.08 Expect: 0.000

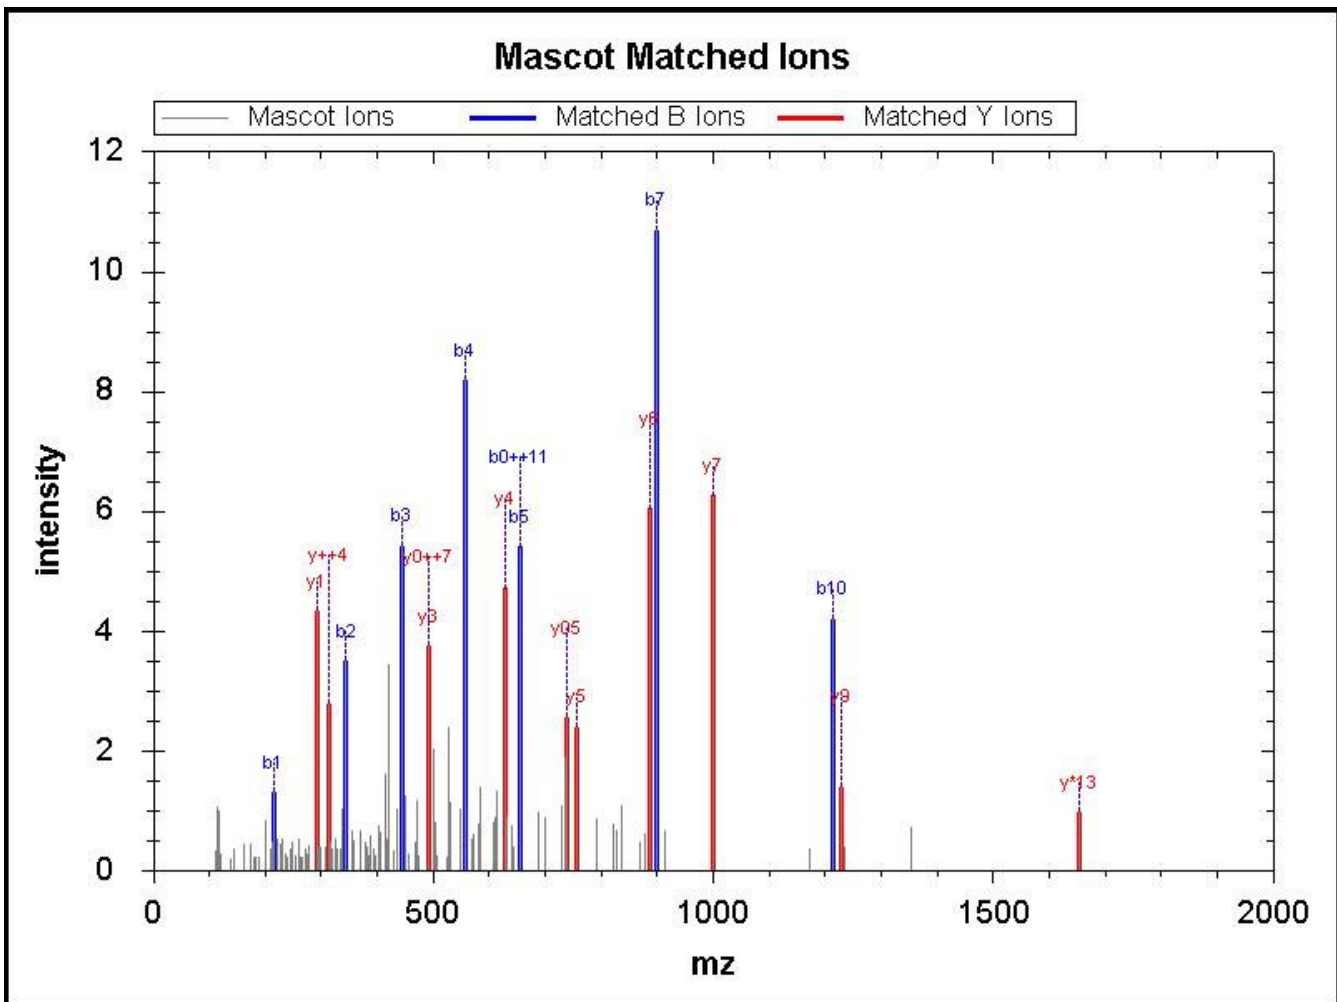

| No | b      | b++    | b*     | b*++   | b0     | b0++   | Seq | y        | y++      | y*       | y*++     | y0       | y0++     | RevNo |
|----|--------|--------|--------|--------|--------|--------|-----|----------|----------|----------|----------|----------|----------|-------|
| 1  | 216.15 | 108.58 |        |        |        |        | A   |          |          |          |          |          |          | 18    |
| 2  | 344.21 | 172.61 | 327.18 | 164.09 |        |        | Q   | 2,111.10 | 1,056.05 | 2,094.07 | 1,047.54 | 2,093.09 | 1,047.05 | 17    |
| 3  | 443.27 | 222.14 | 426.25 | 213.63 |        |        | V   | 1,983.04 | 992.02   | 1,966.01 | 983.51   | 1,965.03 | 983.02   | 16    |
| 4  | 556.36 | 278.68 | 539.33 | 270.17 |        |        | L   | 1,883.97 | 942.49   | 1,866.95 | 933.98   | 1,865.96 | 933.48   | 15    |
| 5  | 655.43 | 328.22 | 638.40 | 319.70 |        |        | V   | 1,770.89 | 885.95   | 1,753.86 | 877.43   | 1,752.88 | 876.94   | 14    |
| 6  | 784.47 | 392.74 | 767.44 | 384.22 | 766.46 | 383.73 | E   | 1,671.82 | 836.41   | 1,654.79 | 827.90   | 1,653.81 | 827.41   | 13    |

|    |          |          |          |          |          |          |   |          |        |          |        |          |        |    |
|----|----------|----------|----------|----------|----------|----------|---|----------|--------|----------|--------|----------|--------|----|
| 7  | 899.50   | 450.25   | 882.47   | 441.74   | 881.48   | 441.25   | D | 1,542.78 | 771.89 | 1,525.75 | 763.38 | 1,524.77 | 762.89 | 12 |
| 8  | 1,012.58 | 506.79   | 995.55   | 498.28   | 994.57   | 497.79   | I | 1,427.75 | 714.38 | 1,410.72 | 705.87 | 1,409.74 | 705.37 | 11 |
| 9  | 1,099.61 | 550.31   | 1,082.59 | 541.80   | 1,081.60 | 541.30   | S | 1,314.67 | 657.84 | 1,297.64 | 649.32 | 1,296.66 | 648.83 | 10 |
| 10 | 1,214.64 | 607.82   | 1,197.61 | 599.31   | 1,196.63 | 598.82   | D | 1,227.63 | 614.32 | 1,210.61 | 605.81 | 1,209.62 | 605.32 | 9  |
| 11 | 1,327.72 | 664.36   | 1,310.70 | 655.85   | 1,309.71 | 655.36   | I | 1,112.61 | 556.81 | 1,095.58 | 548.29 | 1,094.60 | 547.80 | 8  |
| 12 | 1,440.81 | 720.91   | 1,423.78 | 712.39   | 1,422.80 | 711.90   | L | 999.52   | 500.26 | 982.50   | 491.75 | 981.51   | 491.26 | 7  |
| 13 | 1,569.85 | 785.43   | 1,552.82 | 776.92   | 1,551.84 | 776.42   | E | 886.44   | 443.72 | 869.41   | 435.21 | 868.43   | 434.72 | 6  |
| 14 | 1,698.89 | 849.95   | 1,681.87 | 841.44   | 1,680.88 | 840.94   | E | 757.40   | 379.20 | 740.37   | 370.69 | 739.39   | 370.20 | 5  |
| 15 | 1,835.95 | 918.48   | 1,818.92 | 909.97   | 1,817.94 | 909.47   | H | 628.35   | 314.68 | 611.33   | 306.17 | 610.34   | 305.68 | 4  |
| 16 | 1,906.99 | 954.00   | 1,889.96 | 945.48   | 1,888.98 | 944.99   | A | 491.29   | 246.15 | 474.27   | 237.64 | 473.28   | 237.15 | 3  |
| 17 | 2,036.03 | 1,018.52 | 2,019.00 | 1,010.01 | 2,018.02 | 1,009.51 | E | 420.26   | 210.63 | 403.23   | 202.12 | 402.25   | 201.63 | 2  |
| 18 |          |          |          |          |          |          | K | 291.21   | 146.11 | 274.19   | 137.60 |          |        | 1  |

Query 58806 Hit 1

MS/MS Fragmentation of **LGVPFQVLVATHAGLYR**

Found in **sp|Q96T60|PNKP\_HUMAN**, Bifunctional polynucleotide phosphatase/kinase OS=Homo sapiens GN=PNKP PE=1 SV=1  
Match to Query 58806: 1984.135from(662.3854,3+)

Title: 910: Sum of 2 scans in range 2002 (rt=54.6296, f=4, i=609) to 2003 (rt=54.655, f=4, i=610)

[D:\lab212\membrane\Grace\Joyce\iTRAQ\_34\_2.raw]

Data File: Submitted from 20120508-1(merge) by Mascot Daemon on JOYCE-VAIO

Monoisotopic mass of neutral peptide Mr(calc): 1984.135

Variable modifications:

Ions Score: 74.84 Expect: 0.000

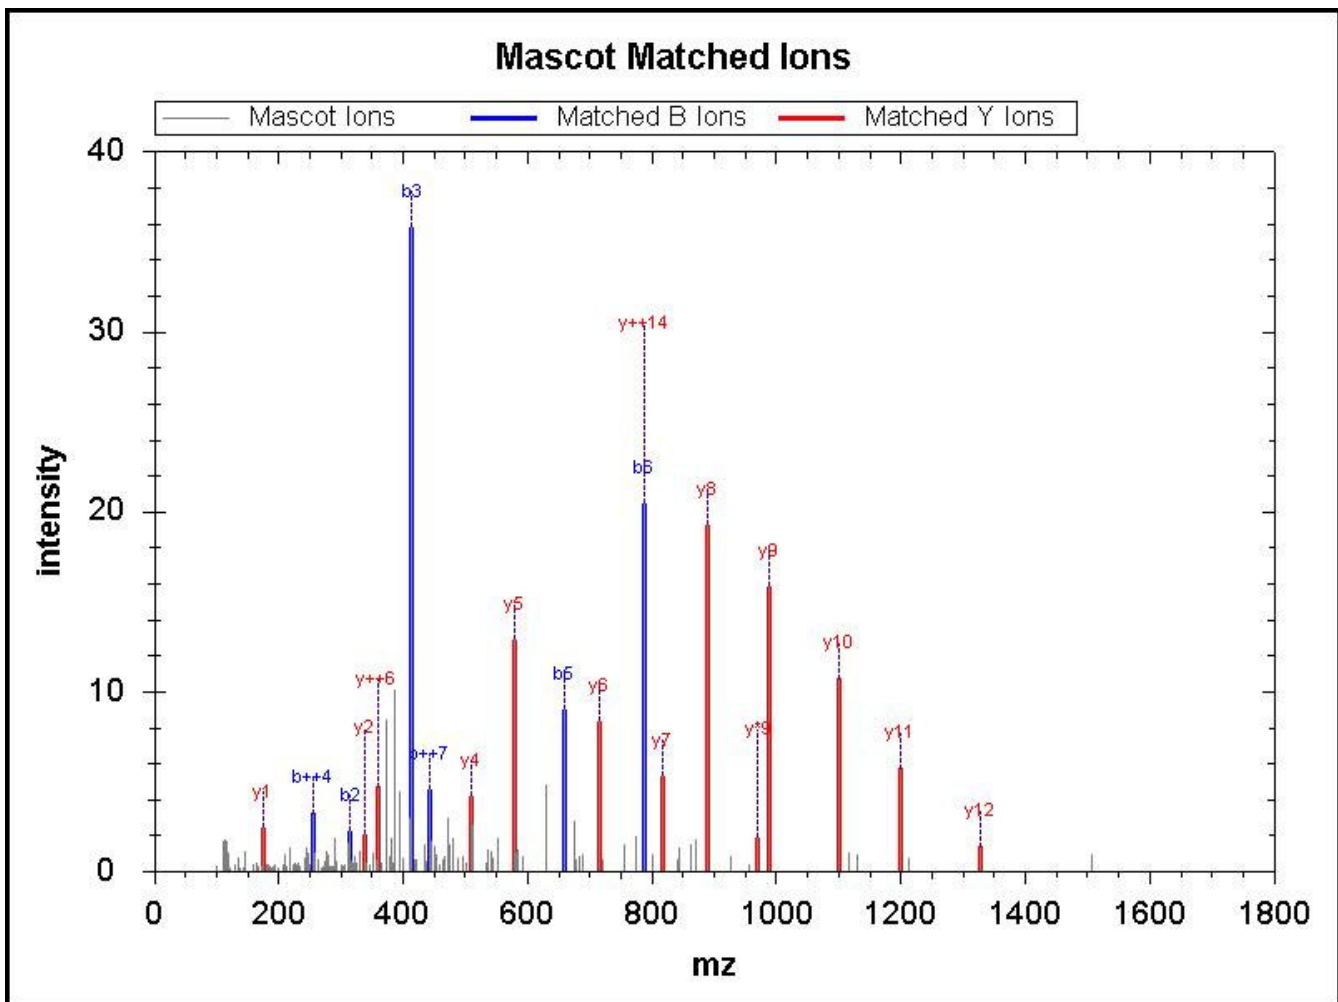

| No | b      | b++    | b* | b*++ | b0 | b0++ | Seq | y | y++ | y* | y*++ | y0 | y0++ | RevNo |
|----|--------|--------|----|------|----|------|-----|---|-----|----|------|----|------|-------|
| 1  | 258.19 | 129.60 |    |      |    |      | L   |   |     |    |      |    |      | 17    |

|    |          |        |          |        |          |        |   |          |        |          |        |          |        |    |
|----|----------|--------|----------|--------|----------|--------|---|----------|--------|----------|--------|----------|--------|----|
| 2  | 315.21   | 158.11 |          |        |          |        | G | 1,727.96 | 864.48 | 1,710.93 | 855.97 | 1,709.95 | 855.48 | 16 |
| 3  | 414.28   | 207.65 |          |        |          |        | V | 1,670.94 | 835.97 | 1,653.91 | 827.46 | 1,652.93 | 826.97 | 15 |
| 4  | 511.34   | 256.17 |          |        |          |        | P | 1,571.87 | 786.44 | 1,554.84 | 777.92 | 1,553.86 | 777.43 | 14 |
| 5  | 658.40   | 329.71 |          |        |          |        | F | 1,474.82 | 737.91 | 1,457.79 | 729.40 | 1,456.81 | 728.91 | 13 |
| 6  | 786.46   | 393.74 | 769.44   | 385.22 |          |        | Q | 1,327.75 | 664.38 | 1,310.72 | 655.86 | 1,309.74 | 655.37 | 12 |
| 7  | 885.53   | 443.27 | 868.50   | 434.76 |          |        | V | 1,199.69 | 600.35 | 1,182.66 | 591.84 | 1,181.68 | 591.34 | 11 |
| 8  | 998.62   | 499.81 | 981.59   | 491.30 |          |        | L | 1,100.62 | 550.81 | 1,083.59 | 542.30 | 1,082.61 | 541.81 | 10 |
| 9  | 1,097.68 | 549.35 | 1,080.66 | 540.83 |          |        | V | 987.54   | 494.27 | 970.51   | 485.76 | 969.53   | 485.27 | 9  |
| 10 | 1,168.72 | 584.86 | 1,151.69 | 576.35 |          |        | A | 888.47   | 444.74 | 871.44   | 436.22 | 870.46   | 435.73 | 8  |
| 11 | 1,269.77 | 635.39 | 1,252.74 | 626.87 | 1,251.76 | 626.38 | T | 817.43   | 409.22 | 800.40   | 400.71 | 799.42   | 400.21 | 7  |
| 12 | 1,406.83 | 703.92 | 1,389.80 | 695.40 | 1,388.82 | 694.91 | H | 716.38   | 358.70 | 699.36   | 350.18 |          |        | 6  |
| 13 | 1,477.86 | 739.44 | 1,460.84 | 730.92 | 1,459.85 | 730.43 | A | 579.32   | 290.17 | 562.30   | 281.65 |          |        | 5  |
| 14 | 1,534.89 | 767.95 | 1,517.86 | 759.43 | 1,516.88 | 758.94 | G | 508.29   | 254.65 | 491.26   | 246.13 |          |        | 4  |
| 15 | 1,647.97 | 824.49 | 1,630.94 | 815.98 | 1,629.96 | 815.48 | L | 451.27   | 226.14 | 434.24   | 217.62 |          |        | 3  |
| 16 | 1,811.03 | 906.02 | 1,794.01 | 897.51 | 1,793.02 | 897.02 | Y | 338.18   | 169.59 | 321.16   | 161.08 |          |        | 2  |
| 17 |          |        |          |        |          |        | R | 175.12   | 88.06  | 158.09   | 79.55  |          |        | 1  |

Query 66682 Hit 1

MS/MS Fragmentation of **VGLIHMLTHLAEALHQAR**

Found in **sp|Q9BWS9|CHID1\_HUMAN**, Chitinase domain-containing protein 1 OS=Homo sapiens GN=CHID1 PE=1 SV=1

Match to Query 66682: 2153.201 from (718.7408, 3+)

Title: 819: Scan 2435 (rt=61.2623, f=2, i=360) [D:\lab212\membrane\Grace\Joyce\iTRAQ\_52\_2.raw]

Data File: Submitted from 20120508-1(merge) by Mascot Daemon on JOYCE-VAIO

Monoisotopic mass of neutral peptide Mr(calc): 2153.201

Variable modifications:

Ions Score: 74.17 Expect: 0.000



### Mascot Matched Ions

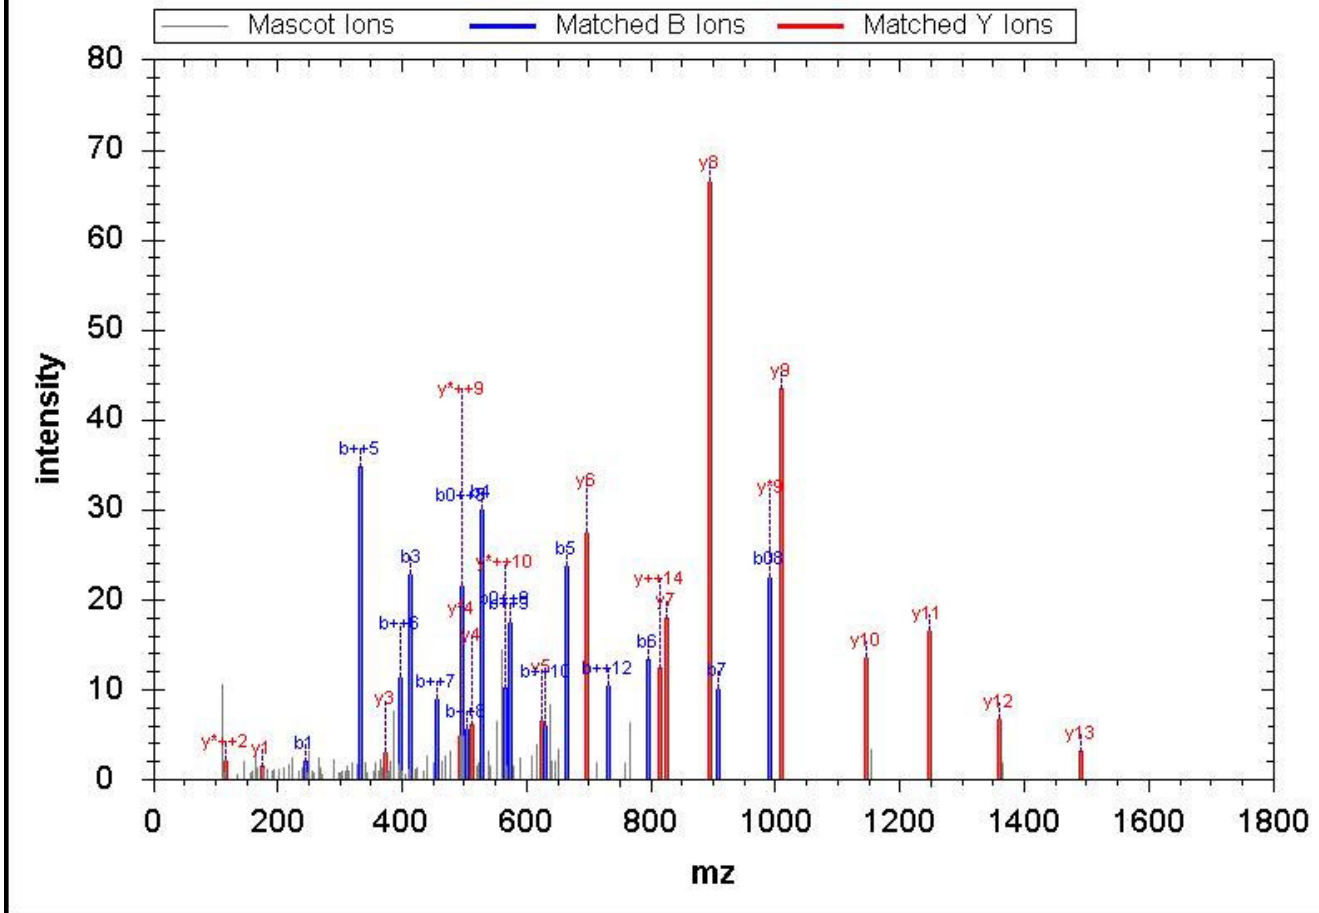

| No | b        | b++    | b*       | b*++   | b0       | b0++   | Seq | y        | y++    | y*       | y*++   | y0       | y0++   | RevNo |
|----|----------|--------|----------|--------|----------|--------|-----|----------|--------|----------|--------|----------|--------|-------|
| 1  | 244.18   | 122.59 |          |        |          |        | V   |          |        |          |        |          |        | 18    |
| 2  | 301.20   | 151.10 |          |        |          |        | G   | 1,911.04 | 956.02 | 1,894.01 | 947.51 | 1,893.03 | 947.02 | 17    |
| 3  | 414.28   | 207.65 |          |        |          |        | L   | 1,854.02 | 927.51 | 1,836.99 | 919.00 | 1,836.01 | 918.51 | 16    |
| 4  | 527.37   | 264.19 |          |        |          |        | I   | 1,740.93 | 870.97 | 1,723.91 | 862.46 | 1,722.92 | 861.96 | 15    |
| 5  | 664.43   | 332.72 |          |        |          |        | H   | 1,627.85 | 814.43 | 1,610.82 | 805.91 | 1,609.84 | 805.42 | 14    |
| 6  | 795.47   | 398.24 |          |        |          |        | M   | 1,490.79 | 745.90 | 1,473.76 | 737.39 | 1,472.78 | 736.89 | 13    |
| 7  | 908.55   | 454.78 |          |        |          |        | L   | 1,359.75 | 680.38 | 1,342.72 | 671.86 | 1,341.74 | 671.37 | 12    |
| 8  | 1,009.60 | 505.30 |          |        | 991.59   | 496.30 | T   | 1,246.67 | 623.84 | 1,229.64 | 615.32 | 1,228.65 | 614.83 | 11    |
| 9  | 1,146.66 | 573.83 |          |        | 1,128.65 | 564.83 | H   | 1,145.62 | 573.31 | 1,128.59 | 564.80 | 1,127.61 | 564.31 | 10    |
| 10 | 1,259.74 | 630.37 |          |        | 1,241.73 | 621.37 | L   | 1,008.56 | 504.78 | 991.53   | 496.27 | 990.55   | 495.78 | 9     |
| 11 | 1,330.78 | 665.89 |          |        | 1,312.77 | 656.89 | A   | 895.47   | 448.24 | 878.45   | 439.73 | 877.46   | 439.24 | 8     |
| 12 | 1,459.82 | 730.41 |          |        | 1,441.81 | 721.41 | E   | 824.44   | 412.72 | 807.41   | 404.21 | 806.43   | 403.72 | 7     |
| 13 | 1,530.86 | 765.93 |          |        | 1,512.85 | 756.93 | A   | 695.39   | 348.20 | 678.37   | 339.69 |          |        | 6     |
| 14 | 1,643.94 | 822.47 |          |        | 1,625.93 | 813.47 | L   | 624.36   | 312.68 | 607.33   | 304.17 |          |        | 5     |
| 15 | 1,781.00 | 891.00 |          |        | 1,762.99 | 882.00 | H   | 511.27   | 256.14 | 494.25   | 247.63 |          |        | 4     |
| 16 | 1,909.06 | 955.03 | 1,892.03 | 946.52 | 1,891.05 | 946.03 | Q   | 374.21   | 187.61 | 357.19   | 179.10 |          |        | 3     |
| 17 | 1,980.10 | 990.55 | 1,963.07 | 982.04 | 1,962.09 | 981.55 | A   | 246.16   | 123.58 | 229.13   | 115.07 |          |        | 2     |
| 18 |          |        |          |        |          |        | R   | 175.12   | 88.06  | 158.09   | 79.55  |          |        | 1     |

Query 40396 Hit 1

MS/MS Fragmentation of **DPAAPEPEEQEER**

Found in **sp|Q969T4|UB2E3\_HUMAN**, Ubiquitin-conjugating enzyme E2 E3 OS=Homo sapiens GN=UBE2E3 PE=1 SV=1  
Match to Query 40396: 1639.742from(820.8785,2+)

Title: 87: Sum of 2 scans in range 395 (rt=18.0766, f=4, i=43) to 396 (rt=18.102, f=4, i=44)

[D:\lab212\membrane\Grace\Joyce\iTRAQ\_21\_2.raw]

Data File: Submitted from 20120508-1(merge) by Mascot Daemon on JOYCE-VAIO

Monoisotopic mass of neutral peptide Mr(calc): 1639.742

Variable modifications:

Ions Score: 74.13 Expect: 0.000

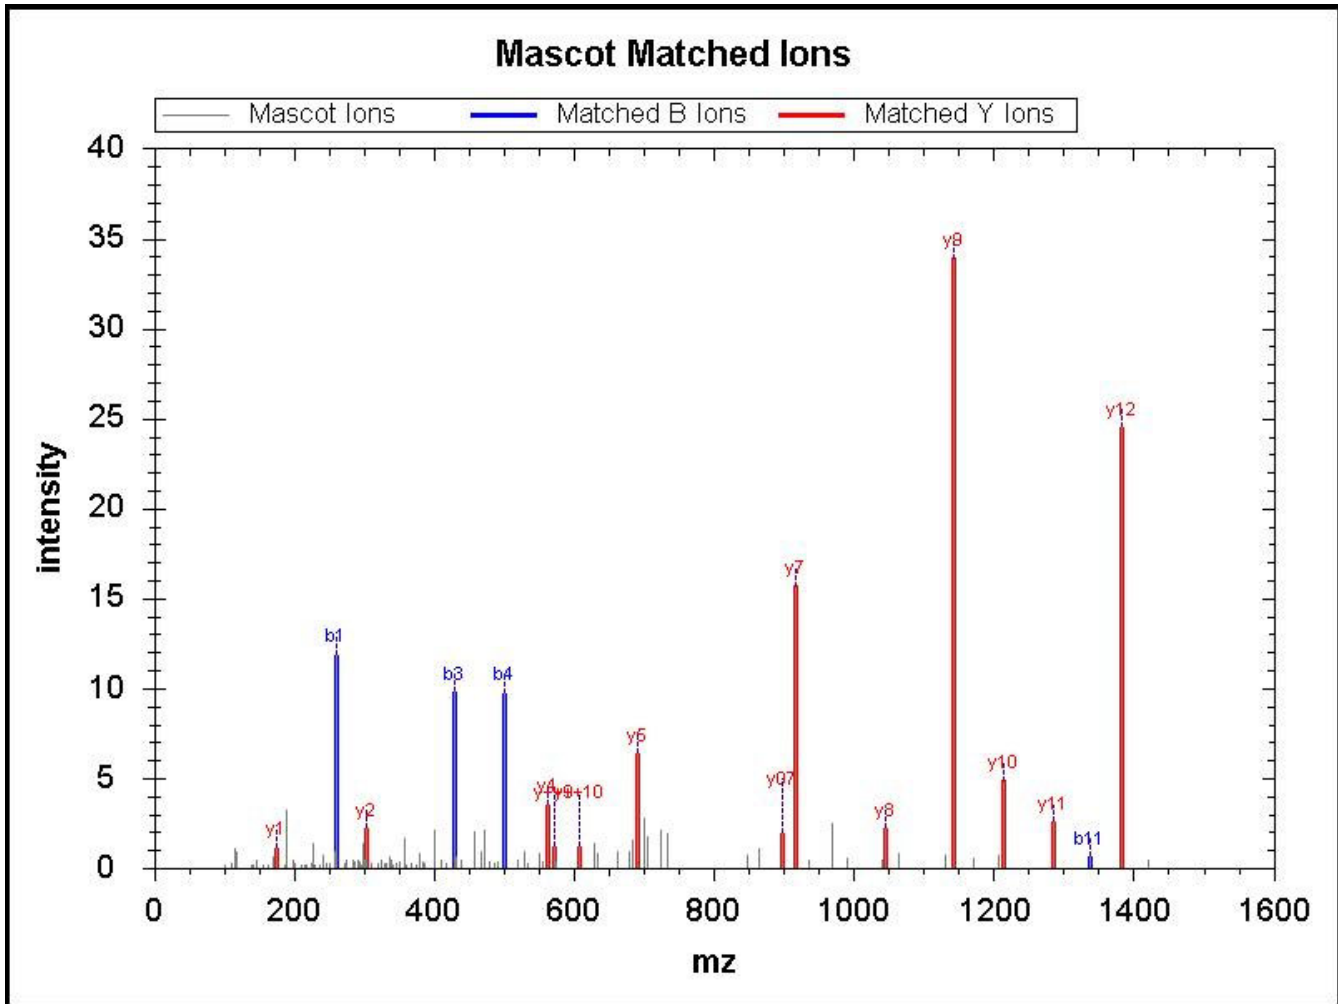

| No | b        | b++    | b*       | b*++   | b0       | b0++   | Seq | y        | y++    | y*       | y*++   | y0       | y0++   | RevNo |
|----|----------|--------|----------|--------|----------|--------|-----|----------|--------|----------|--------|----------|--------|-------|
| 1  | 260.14   | 130.57 |          |        | 242.13   | 121.57 | D   |          |        |          |        |          |        | 13    |
| 2  | 357.19   | 179.10 |          |        | 339.18   | 170.09 | P   | 1,381.62 | 691.32 | 1,364.60 | 682.80 | 1,363.61 | 682.31 | 12    |
| 3  | 428.23   | 214.62 |          |        | 410.22   | 205.61 | A   | 1,284.57 | 642.79 | 1,267.54 | 634.28 | 1,266.56 | 633.78 | 11    |
| 4  | 499.26   | 250.14 |          |        | 481.25   | 241.13 | A   | 1,213.53 | 607.27 | 1,196.51 | 598.76 | 1,195.52 | 598.26 | 10    |
| 5  | 596.32   | 298.66 |          |        | 578.31   | 289.66 | P   | 1,142.50 | 571.75 | 1,125.47 | 563.24 | 1,124.49 | 562.75 | 9     |
| 6  | 725.36   | 363.18 |          |        | 707.35   | 354.18 | E   | 1,045.44 | 523.23 | 1,028.42 | 514.71 | 1,027.43 | 514.22 | 8     |
| 7  | 822.41   | 411.71 |          |        | 804.40   | 402.70 | P   | 916.40   | 458.70 | 899.37   | 450.19 | 898.39   | 449.70 | 7     |
| 8  | 951.45   | 476.23 |          |        | 933.44   | 467.23 | E   | 819.35   | 410.18 | 802.32   | 401.66 | 801.34   | 401.17 | 6     |
| 9  | 1,080.50 | 540.75 |          |        | 1,062.49 | 531.75 | E   | 690.31   | 345.66 | 673.28   | 337.14 | 672.29   | 336.65 | 5     |
| 10 | 1,208.56 | 604.78 | 1,191.53 | 596.27 | 1,190.54 | 595.78 | Q   | 561.26   | 281.13 | 544.24   | 272.62 | 543.25   | 272.13 | 4     |
| 11 | 1,337.60 | 669.30 | 1,320.57 | 660.79 | 1,319.59 | 660.30 | E   | 433.20   | 217.11 | 416.18   | 208.59 | 415.19   | 208.10 | 3     |
| 12 | 1,466.64 | 733.82 | 1,449.61 | 725.31 | 1,448.63 | 724.82 | E   | 304.16   | 152.58 | 287.13   | 144.07 | 286.15   | 143.58 | 2     |
| 13 |          |        |          |        |          |        | R   | 175.12   | 88.06  | 158.09   | 79.55  |          |        | 1     |

Query 56384 Hit 1

MS/MS Fragmentation of AIGIEPSLATYHHIIR

Found in sp|Q96EY7|PTCD3\_HUMAN, Pentatricopeptide repeat-containing protein 3

Match to Query 56384: 1934.087from(484.529,4+)

Title: 575: Scan 1370 (rt=40.3204, f=3, i=210) [D:\lab212\membrane\Grace\Joyce\47\_1.raw]

Data File: Submitted from 20120508-1(merge) by Mascot Daemon on JOYCE-VAIO

Monoisotopic mass of neutral peptide Mr(calc): 1934.087

Variable modifications:

Ions Score: 73.94 Expect: 0.000

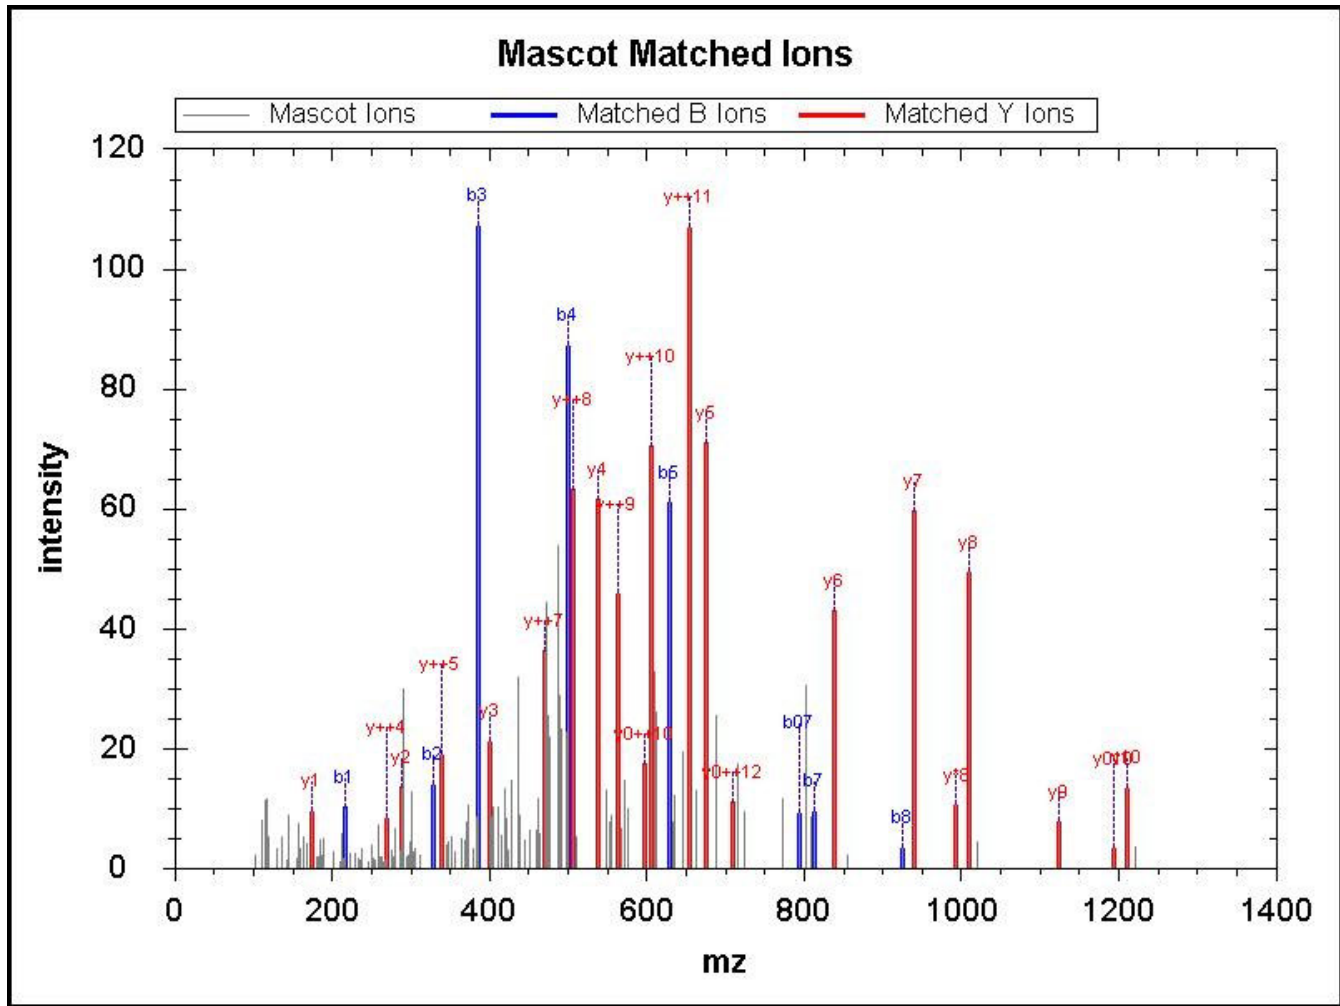

| No | b        | b++    | b0       | b0++   | Seq | y        | y++    | y*       | y*++   | y0       | y0++   | RevNo |
|----|----------|--------|----------|--------|-----|----------|--------|----------|--------|----------|--------|-------|
| 1  | 216.15   | 108.58 |          |        | A   |          |        |          |        |          |        | 16    |
| 2  | 329.23   | 165.12 |          |        | I   | 1,719.95 | 860.48 | 1,702.93 | 851.97 | 1,701.94 | 851.48 | 15    |
| 3  | 386.25   | 193.63 |          |        | G   | 1,606.87 | 803.94 | 1,589.84 | 795.43 | 1,588.86 | 794.93 | 14    |
| 4  | 499.34   | 250.17 |          |        | I   | 1,549.85 | 775.43 | 1,532.82 | 766.91 | 1,531.84 | 766.42 | 13    |
| 5  | 628.38   | 314.69 | 610.37   | 305.69 | E   | 1,436.76 | 718.89 | 1,419.74 | 710.37 | 1,418.75 | 709.88 | 12    |
| 6  | 725.43   | 363.22 | 707.42   | 354.21 | P   | 1,307.72 | 654.36 | 1,290.70 | 645.85 | 1,289.71 | 645.36 | 11    |
| 7  | 812.46   | 406.74 | 794.45   | 397.73 | S   | 1,210.67 | 605.84 | 1,193.64 | 597.32 | 1,192.66 | 596.83 | 10    |
| 8  | 925.55   | 463.28 | 907.54   | 454.27 | L   | 1,123.64 | 562.32 | 1,106.61 | 553.81 | 1,105.63 | 553.32 | 9     |
| 9  | 996.58   | 498.80 | 978.57   | 489.79 | A   | 1,010.55 | 505.78 | 993.53   | 497.27 | 992.54   | 496.77 | 8     |
| 10 | 1,097.63 | 549.32 | 1,079.62 | 540.31 | T   | 939.52   | 470.26 | 922.49   | 461.75 | 921.51   | 461.26 | 7     |
| 11 | 1,260.70 | 630.85 | 1,242.69 | 621.85 | Y   | 838.47   | 419.74 | 821.44   | 411.22 |          |        | 6     |
| 12 | 1,397.75 | 699.38 | 1,379.74 | 690.38 | H   | 675.40   | 338.21 | 658.38   | 329.69 |          |        | 5     |
| 13 | 1,534.81 | 767.91 | 1,516.80 | 758.91 | H   | 538.35   | 269.68 | 521.32   | 261.16 |          |        | 4     |
| 14 | 1,647.90 | 824.45 | 1,629.89 | 815.45 | I   | 401.29   | 201.15 | 384.26   | 192.63 |          |        | 3     |
| 15 | 1,760.98 | 880.99 | 1,742.97 | 871.99 | I   | 288.20   | 144.61 | 271.18   | 136.09 |          |        | 2     |
| 16 |          |        |          |        | R   | 175.12   | 88.06  | 158.09   | 79.55  |          |        | 1     |

Query 70132 Hit 1

MS/MS Fragmentation of FNSVVTNPQGHYNPSTGK

Found in sp|Q02105|C1QC\_MOUSE, Complement C1q subcomponent subunit C OS=Mus musculus GN=C1qc PE=2 SV=1

Match to Query 70132: 2234.125from(745.7156,3+)

Title: 319: Scan 793 (rt=27.1951, f=3, i=111) [D:\lab212\membrane\Grace\Joyce\iTRAQ\_38\_1.raw]

Data File: Submitted from 20120508-1(merge) by Mascot Daemon on JOYCE-VAIO

Monoisotopic mass of neutral peptide Mr(calc): 2234.125

Variable modifications:

K18 :iTRAQ4plex (K)

Ions Score: 73.48 Expect: 0.000

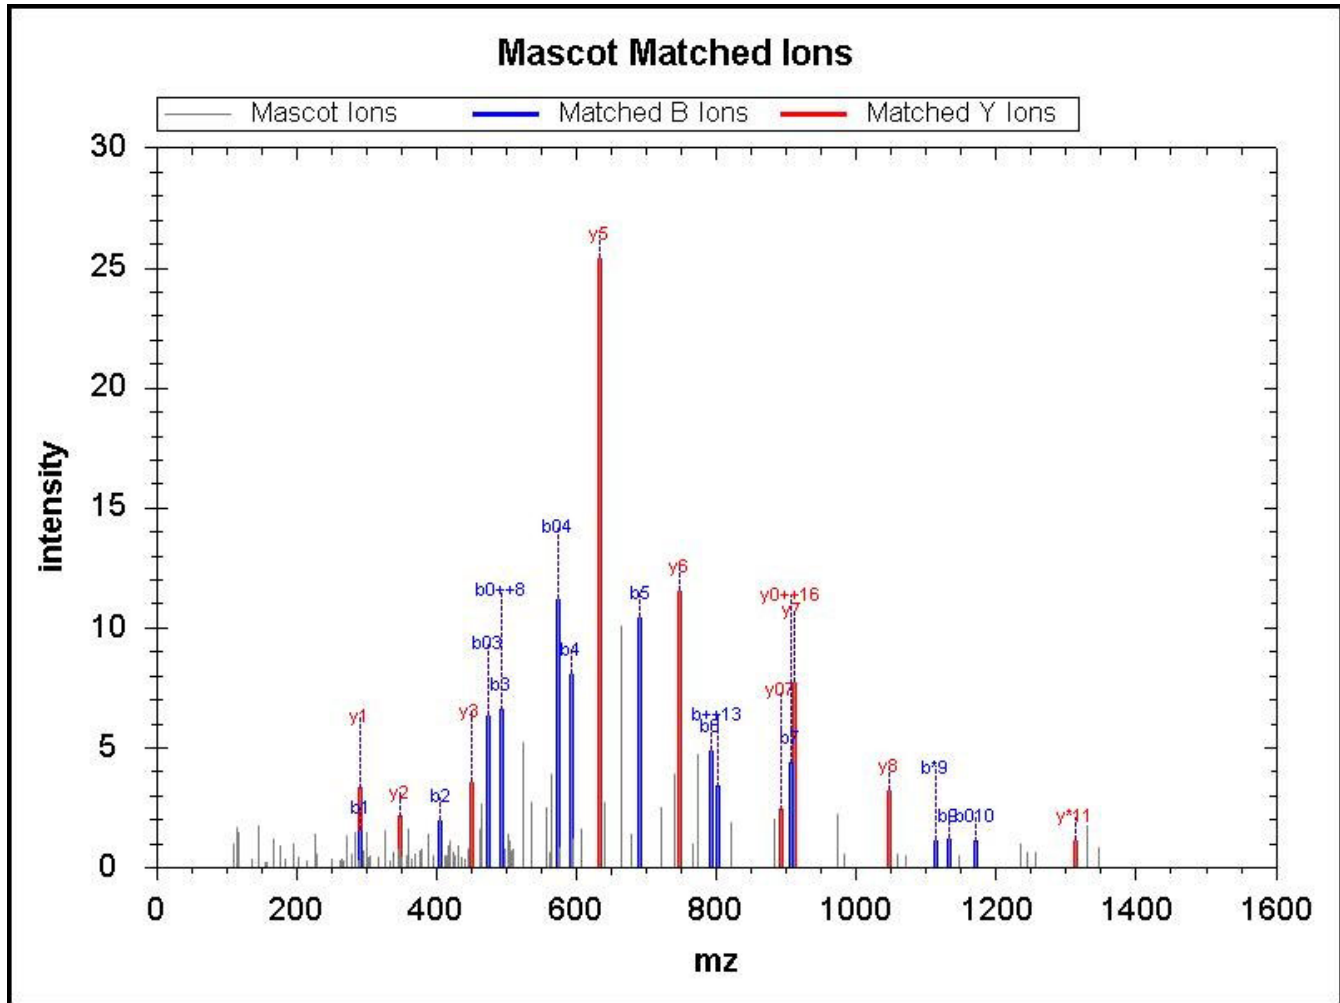

| No | b        | b++    | b*       | b*++   | b0       | b0++   | Seq | y        | y++    | y*       | y*++   | y0       | y0++   | RevNo |
|----|----------|--------|----------|--------|----------|--------|-----|----------|--------|----------|--------|----------|--------|-------|
| 1  | 292.18   | 146.59 |          |        |          |        | F   |          |        |          |        |          |        | 18    |
| 2  | 406.22   | 203.61 | 389.19   | 195.10 |          |        | N   | 1,943.97 | 972.49 | 1,926.94 | 963.97 | 1,925.96 | 963.48 | 17    |
| 3  | 493.25   | 247.13 | 476.23   | 238.62 | 475.24   | 238.12 | S   | 1,829.93 | 915.47 | 1,812.90 | 906.95 | 1,811.92 | 906.46 | 16    |
| 4  | 592.32   | 296.66 | 575.29   | 288.15 | 574.31   | 287.66 | V   | 1,742.89 | 871.95 | 1,725.87 | 863.44 | 1,724.88 | 862.95 | 15    |
| 5  | 691.39   | 346.20 | 674.36   | 337.69 | 673.38   | 337.19 | V   | 1,643.83 | 822.42 | 1,626.80 | 813.90 | 1,625.82 | 813.41 | 14    |
| 6  | 792.44   | 396.72 | 775.41   | 388.21 | 774.43   | 387.72 | T   | 1,544.76 | 772.88 | 1,527.73 | 764.37 | 1,526.75 | 763.88 | 13    |
| 7  | 906.48   | 453.74 | 889.45   | 445.23 | 888.47   | 444.74 | N   | 1,443.71 | 722.36 | 1,426.68 | 713.85 | 1,425.70 | 713.35 | 12    |
| 8  | 1,003.53 | 502.27 | 986.51   | 493.76 | 985.52   | 493.26 | P   | 1,329.67 | 665.34 | 1,312.64 | 656.82 | 1,311.66 | 656.33 | 11    |
| 9  | 1,131.59 | 566.30 | 1,114.57 | 557.79 | 1,113.58 | 557.29 | Q   | 1,232.61 | 616.81 | 1,215.59 | 608.30 | 1,214.60 | 607.81 | 10    |
| 10 | 1,188.61 | 594.81 | 1,171.59 | 586.30 | 1,170.60 | 585.80 | G   | 1,104.56 | 552.78 | 1,087.53 | 544.27 | 1,086.54 | 543.78 | 9     |
| 11 | 1,325.67 | 663.34 | 1,308.65 | 654.83 | 1,307.66 | 654.33 | H   | 1,047.53 | 524.27 | 1,030.51 | 515.76 | 1,029.52 | 515.27 | 8     |
| 12 | 1,488.74 | 744.87 | 1,471.71 | 736.36 | 1,470.72 | 735.87 | Y   | 910.47   | 455.74 | 893.45   | 447.23 | 892.46   | 446.74 | 7     |
| 13 | 1,602.78 | 801.89 | 1,585.75 | 793.38 | 1,584.77 | 792.89 | N   | 747.41   | 374.21 | 730.39   | 365.70 | 729.40   | 365.20 | 6     |
| 14 | 1,699.83 | 850.42 | 1,682.80 | 841.91 | 1,681.82 | 841.41 | P   | 633.37   | 317.19 | 616.34   | 308.67 | 615.36   | 308.18 | 5     |
| 15 | 1,786.86 | 893.94 | 1,769.84 | 885.42 | 1,768.85 | 884.93 | S   | 536.32   | 268.66 | 519.29   | 260.15 | 518.31   | 259.66 | 4     |
| 16 | 1,887.91 | 944.46 | 1,870.88 | 935.95 | 1,869.90 | 935.45 | T   | 449.28   | 225.15 | 432.26   | 216.63 | 431.27   | 216.14 | 3     |
| 17 | 1,944.93 | 972.97 | 1,927.91 | 964.46 | 1,926.92 | 963.96 | G   | 348.24   | 174.62 | 331.21   | 166.11 |          |        | 2     |
| 18 |          |        |          |        |          |        | K   | 291.21   | 146.11 | 274.19   | 137.60 |          |        | 1     |

Query 30729 Hit 1

MS/MS Fragmentation of **EILVEESNVQR**

Found in **sp|P60510|PP4C\_HUMAN**, Serine/threonine-protein phosphatase 4 catalytic subunit OS=Homo sapiens GN=PPP4C PE=1 SV=1

Match to Query 30729: 1458.781 from (730.3979,2+)

Title: 192: Scan 991 (rt=29.3788, f=2, i=105) [D:\lab212\membrane\Grace\Joyce\iTRAQ\_22\_2.raw]

Data File: Submitted from 20120508-1(merge) by Mascot Daemon on JOYCE-VAIO

Monoisotopic mass of neutral peptide Mr(calc): 1458.781

Variable modifications:

Ions Score: 73.28 Expect: 0.000

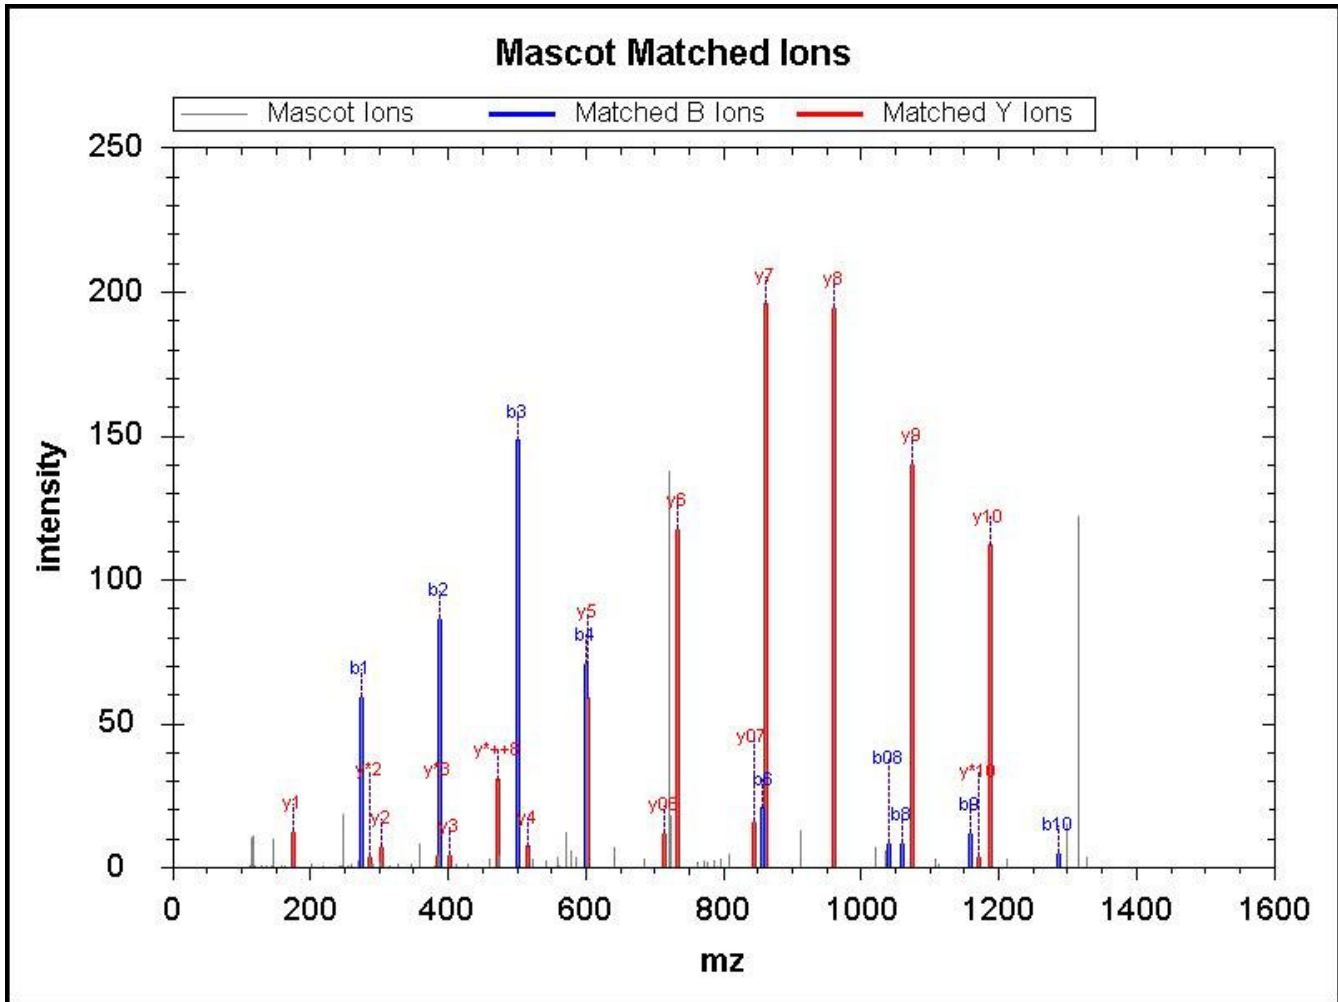

| No | b        | b++    | b*       | b*++   | b0       | b0++   | Seq | y        | y++    | y*       | y*++   | y0       | y0++   | RevNo |
|----|----------|--------|----------|--------|----------|--------|-----|----------|--------|----------|--------|----------|--------|-------|
| 1  | 274.15   | 137.58 |          |        | 256.14   | 128.57 | E   |          |        |          |        |          |        | 11    |
| 2  | 387.24   | 194.12 |          |        | 369.23   | 185.12 | I   | 1,186.64 | 593.83 | 1,169.62 | 585.31 | 1,168.63 | 584.82 | 10    |
| 3  | 500.32   | 250.66 |          |        | 482.31   | 241.66 | L   | 1,073.56 | 537.28 | 1,056.53 | 528.77 | 1,055.55 | 528.28 | 9     |
| 4  | 599.39   | 300.20 |          |        | 581.38   | 291.19 | V   | 960.47   | 480.74 | 943.45   | 472.23 | 942.46   | 471.74 | 8     |
| 5  | 728.43   | 364.72 |          |        | 710.42   | 355.71 | E   | 861.41   | 431.21 | 844.38   | 422.69 | 843.40   | 422.20 | 7     |
| 6  | 857.47   | 429.24 |          |        | 839.46   | 420.24 | E   | 732.36   | 366.69 | 715.34   | 358.17 | 714.35   | 357.68 | 6     |
| 7  | 944.51   | 472.76 |          |        | 926.50   | 463.75 | S   | 603.32   | 302.16 | 586.29   | 293.65 | 585.31   | 293.16 | 5     |
| 8  | 1,058.55 | 529.78 | 1,041.52 | 521.26 | 1,040.54 | 520.77 | N   | 516.29   | 258.65 | 499.26   | 250.13 |          |        | 4     |
| 9  | 1,157.62 | 579.31 | 1,140.59 | 570.80 | 1,139.61 | 570.31 | V   | 402.25   | 201.63 | 385.22   | 193.11 |          |        | 3     |
| 10 | 1,285.68 | 643.34 | 1,268.65 | 634.83 | 1,267.67 | 634.34 | Q   | 303.18   | 152.09 | 286.15   | 143.58 |          |        | 2     |
| 11 |          |        |          |        |          |        | R   | 175.12   | 88.06  | 158.09   | 79.55  |          |        | 1     |

Query 74205 Hit 1

MS/MS Fragmentation of **VGLTSEILNSFEHEFLSK**

Found in **sp|Q14181|DPOA2\_HUMAN**, DNA polymerase alpha subunit B OS=Homo sapiens GN=POLA2 PE=1 SV=2

Match to Query 74205: 2337.247from(780.0897,3+)

Title: 1159: Sum of 2 scans in range 2590 (rt=67.6027, f=2, i=430) to 2591 (rt=67.6281, f=2, i=431)

[D:\lab212\membrane\GraceJoyce\iTRAQ\_36\_2.raw]

Data File: Submitted from 20120508-1(merge) by Mascot Daemon on JOYCE-VAIO

Monoisotopic mass of neutral peptide Mr(calc): 2337.247

Variable modifications:

K18 iTRAQ4plex (K)

Ions Score: 73.28 Expect: 0.000

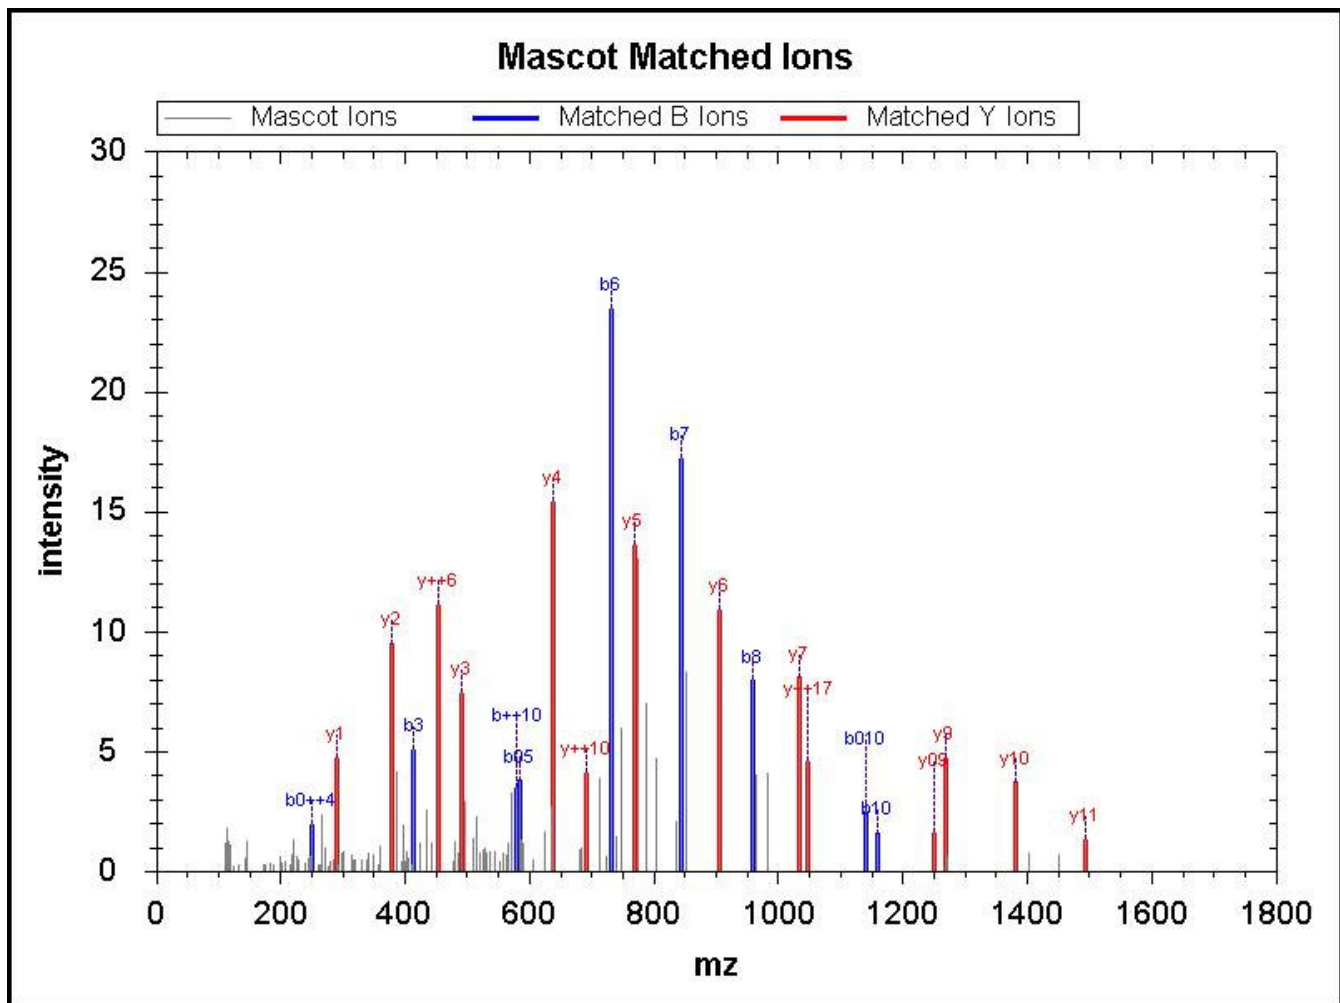

| No | b        | b++      | b*       | b*++     | b0       | b0++     | Seq | y        | y++      | y*       | y*++     | y0       | y0++     | RevNo |
|----|----------|----------|----------|----------|----------|----------|-----|----------|----------|----------|----------|----------|----------|-------|
| 1  | 244.18   | 122.59   |          |          |          |          | V   |          |          |          |          |          |          | 18    |
| 2  | 301.20   | 151.10   |          |          |          |          | G   | 2,095.08 | 1,048.05 | 2,078.06 | 1,039.53 | 2,077.07 | 1,039.04 | 17    |
| 3  | 414.28   | 207.65   |          |          |          |          | L   | 2,038.06 | 1,019.53 | 2,021.03 | 1,011.02 | 2,020.05 | 1,010.53 | 16    |
| 4  | 515.33   | 258.17   |          |          | 497.32   | 249.16   | T   | 1,924.98 | 962.99   | 1,907.95 | 954.48   | 1,906.97 | 953.99   | 15    |
| 5  | 602.36   | 301.69   |          |          | 584.35   | 292.68   | S   | 1,823.93 | 912.47   | 1,806.90 | 903.96   | 1,805.92 | 903.46   | 14    |
| 6  | 731.41   | 366.21   |          |          | 713.40   | 357.20   | E   | 1,736.90 | 868.95   | 1,719.87 | 860.44   | 1,718.89 | 859.95   | 13    |
| 7  | 844.49   | 422.75   |          |          | 826.48   | 413.74   | I   | 1,607.85 | 804.43   | 1,590.83 | 795.92   | 1,589.84 | 795.43   | 12    |
| 8  | 957.57   | 479.29   |          |          | 939.56   | 470.29   | L   | 1,494.77 | 747.89   | 1,477.74 | 739.38   | 1,476.76 | 738.88   | 11    |
| 9  | 1,071.62 | 536.31   | 1,054.59 | 527.80   | 1,053.61 | 527.31   | N   | 1,381.69 | 691.35   | 1,364.66 | 682.83   | 1,363.68 | 682.34   | 10    |
| 10 | 1,158.65 | 579.83   | 1,141.62 | 571.31   | 1,140.64 | 570.82   | S   | 1,267.64 | 634.33   | 1,250.62 | 625.81   | 1,249.63 | 625.32   | 9     |
| 11 | 1,305.72 | 653.36   | 1,288.69 | 644.85   | 1,287.71 | 644.36   | F   | 1,180.61 | 590.81   | 1,163.59 | 582.30   | 1,162.60 | 581.80   | 8     |
| 12 | 1,434.76 | 717.88   | 1,417.73 | 709.37   | 1,416.75 | 708.88   | E   | 1,033.54 | 517.28   | 1,016.52 | 508.76   | 1,015.53 | 508.27   | 7     |
| 13 | 1,571.82 | 786.41   | 1,554.79 | 777.90   | 1,553.81 | 777.41   | H   | 904.50   | 452.75   | 887.47   | 444.24   | 886.49   | 443.75   | 6     |
| 14 | 1,700.86 | 850.93   | 1,683.83 | 842.42   | 1,682.85 | 841.93   | E   | 767.44   | 384.22   | 750.42   | 375.71   | 749.43   | 375.22   | 5     |
| 15 | 1,847.93 | 924.47   | 1,830.90 | 915.96   | 1,829.92 | 915.46   | F   | 638.40   | 319.70   | 621.37   | 311.19   | 620.39   | 310.70   | 4     |
| 16 | 1,961.01 | 981.01   | 1,943.99 | 972.50   | 1,943.00 | 972.01   | L   | 491.33   | 246.17   | 474.30   | 237.66   | 473.32   | 237.16   | 3     |
| 17 | 2,048.05 | 1,024.53 | 2,031.02 | 1,016.01 | 2,030.04 | 1,015.52 | S   | 378.25   | 189.63   | 361.22   | 181.11   | 360.24   | 180.62   | 2     |



|    |          |          |          |          |          |          |   |        |        |        |        |        |        |   |
|----|----------|----------|----------|----------|----------|----------|---|--------|--------|--------|--------|--------|--------|---|
| 15 | 1,982.05 | 991.53   | 1,965.03 | 983.02   | 1,964.04 | 982.53   | M | 550.23 | 275.62 | 533.20 | 267.10 | 532.22 | 266.61 | 4 |
| 16 | 2,097.08 | 1,049.04 | 2,080.05 | 1,040.53 | 2,079.07 | 1,040.04 | D | 419.19 | 210.10 | 402.16 | 201.58 | 401.18 | 201.09 | 3 |
| 17 | 2,226.12 | 1,113.57 | 2,209.10 | 1,105.05 | 2,208.11 | 1,104.56 | E | 304.16 | 152.58 | 287.13 | 144.07 | 286.15 | 143.58 | 2 |
| 18 |          |          |          |          |          |          | R | 175.12 | 88.06  | 158.09 | 79.55  |        |        | 1 |

Query 88597 Hit 1

MS/MS Fragmentation of **DFVEAPSQMLENWWVEQEPLLR**

Found in [sp|P52888|THOP1\\_HUMAN](#), Thimet oligopeptidase OS=Homo sapiens GN=THOP1 PE=1 SV=2

Match to Query 88597: 2859.406from(954.1427,3+)

Title: 1204: Sum of 2 scans in range 2827 (rt=72.6365, f=4, i=784) to 2828 (rt=72.6619, f=4, i=785)

[D:\lab212\membrane\Grace\Joyce\20120320\_iTRAQ\_20-1.raw]

Data File: Submitted from 20120508-1(merge) by Mascot Daemon on JOYCE-VAIO

Monoisotopic mass of neutral peptide Mr(calc): 2859.406

Variable modifications:

Ions Score: 72.65 Expect: 0.000

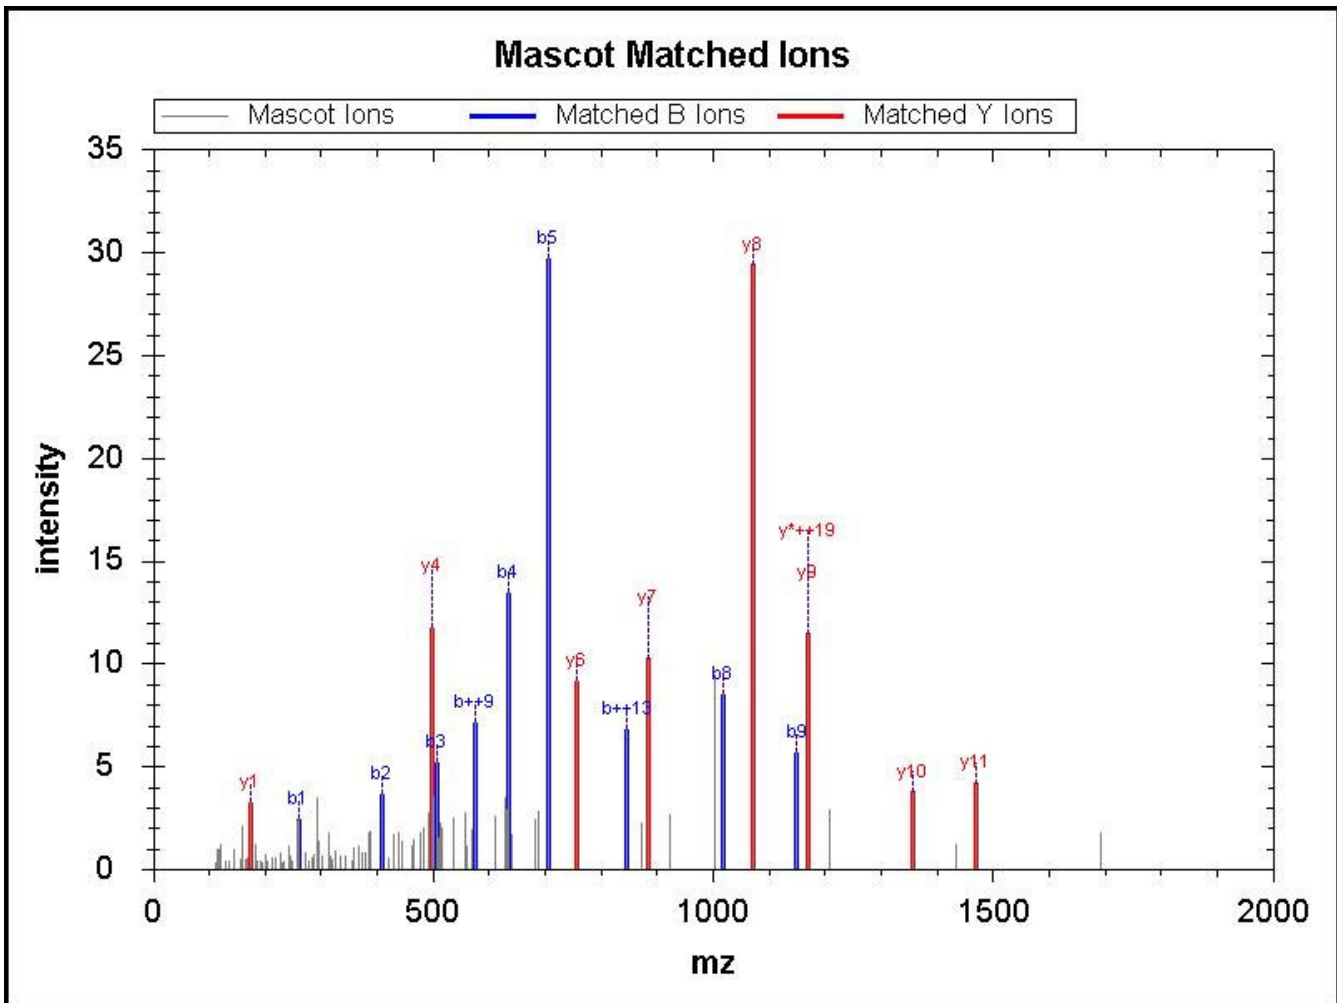

| No | b        | b++    | b*       | b*++   | b0       | b0++   | Seq | y        | y++      | y*       | y*++     | y0       | y0++     | RevNo |
|----|----------|--------|----------|--------|----------|--------|-----|----------|----------|----------|----------|----------|----------|-------|
| 1  | 260.14   | 130.57 |          |        | 242.13   | 121.57 | D   |          |          |          |          |          |          | 22    |
| 2  | 407.20   | 204.11 |          |        | 389.19   | 195.10 | F   | 2,601.28 | 1,301.14 | 2,584.25 | 1,292.63 | 2,583.27 | 1,292.14 | 21    |
| 3  | 506.27   | 253.64 |          |        | 488.26   | 244.63 | V   | 2,454.21 | 1,227.61 | 2,437.19 | 1,219.10 | 2,436.20 | 1,218.60 | 20    |
| 4  | 635.32   | 318.16 |          |        | 617.31   | 309.16 | E   | 2,355.14 | 1,178.08 | 2,338.12 | 1,169.56 | 2,337.13 | 1,169.07 | 19    |
| 5  | 706.35   | 353.68 |          |        | 688.34   | 344.67 | A   | 2,226.10 | 1,113.55 | 2,209.07 | 1,105.04 | 2,208.09 | 1,104.55 | 18    |
| 6  | 803.41   | 402.21 |          |        | 785.40   | 393.20 | P   | 2,155.06 | 1,078.04 | 2,138.04 | 1,069.52 | 2,137.05 | 1,069.03 | 17    |
| 7  | 890.44   | 445.72 |          |        | 872.43   | 436.72 | S   | 2,058.01 | 1,029.51 | 2,040.98 | 1,021.00 | 2,040.00 | 1,020.50 | 16    |
| 8  | 1,018.50 | 509.75 | 1,001.47 | 501.24 | 1,000.49 | 500.75 | Q   | 1,970.98 | 985.99   | 1,953.95 | 977.48   | 1,952.97 | 976.99   | 15    |
| 9  | 1,149.54 | 575.27 | 1,132.51 | 566.76 | 1,131.53 | 566.27 | M   | 1,842.92 | 921.96   | 1,825.89 | 913.45   | 1,824.91 | 912.96   | 14    |
| 10 | 1,262.62 | 631.81 | 1,245.59 | 623.30 | 1,244.61 | 622.81 | L   | 1,711.88 | 856.44   | 1,694.85 | 847.93   | 1,693.87 | 847.44   | 13    |



|    |          |          |          |          |          |          |   |          |        |          |        |          |        |    |
|----|----------|----------|----------|----------|----------|----------|---|----------|--------|----------|--------|----------|--------|----|
| 11 | 1,391.66 | 696.34   | 1,374.64 | 687.82   | 1,373.65 | 687.33   | E | 1,598.80 | 799.90 | 1,581.77 | 791.39 | 1,580.79 | 790.90 | 12 |
| 12 | 1,505.71 | 753.36   | 1,488.68 | 744.84   | 1,487.70 | 744.35   | N | 1,469.75 | 735.38 | 1,452.73 | 726.87 | 1,451.74 | 726.38 | 11 |
| 13 | 1,691.79 | 846.40   | 1,674.76 | 837.88   | 1,673.78 | 837.39   | W | 1,355.71 | 678.36 | 1,338.68 | 669.85 | 1,337.70 | 669.35 | 10 |
| 14 | 1,790.85 | 895.93   | 1,773.83 | 887.42   | 1,772.84 | 886.93   | V | 1,169.63 | 585.32 | 1,152.60 | 576.81 | 1,151.62 | 576.31 | 9  |
| 15 | 1,976.93 | 988.97   | 1,959.91 | 980.46   | 1,958.92 | 979.97   | W | 1,070.56 | 535.79 | 1,053.54 | 527.27 | 1,052.55 | 526.78 | 8  |
| 16 | 2,105.98 | 1,053.49 | 2,088.95 | 1,044.98 | 2,087.97 | 1,044.49 | E | 884.48   | 442.75 | 867.46   | 434.23 | 866.47   | 433.74 | 7  |
| 17 | 2,234.03 | 1,117.52 | 2,217.01 | 1,109.01 | 2,216.02 | 1,108.52 | Q | 755.44   | 378.22 | 738.41   | 369.71 | 737.43   | 369.22 | 6  |
| 18 | 2,363.08 | 1,182.04 | 2,346.05 | 1,173.53 | 2,345.07 | 1,173.04 | E | 627.38   | 314.19 | 610.36   | 305.68 | 609.37   | 305.19 | 5  |
| 19 | 2,460.13 | 1,230.57 | 2,443.10 | 1,222.06 | 2,442.12 | 1,221.56 | P | 498.34   | 249.67 | 481.31   | 241.16 |          |        | 4  |
| 20 | 2,573.21 | 1,287.11 | 2,556.19 | 1,278.60 | 2,555.20 | 1,278.11 | L | 401.29   | 201.15 | 384.26   | 192.63 |          |        | 3  |
| 21 | 2,686.30 | 1,343.65 | 2,669.27 | 1,335.14 | 2,668.29 | 1,334.65 | L | 288.20   | 144.61 | 271.18   | 136.09 |          |        | 2  |
| 22 |          |          |          |          |          |          | R | 175.12   | 88.06  | 158.09   | 79.55  |          |        | 1  |

Query 72806 Hit 1

MS/MS Fragmentation of **DVQFAVQQVLQEEHFDAR**

Found in **sp|Q8R146|APEH\_MOUSE**, Acylamino-acid-releasing enzyme OS=Mus musculus GN=Apeh PE=2 SV=2

Match to Query 72806: 2302.143from(768.3881,3+)

Title: 872: Sum of 2 scans in range 1927 (rt=52.8858, f=4, i=583) to 1928 (rt=52.9112, f=4, i=584)

[D:\lab212\membrane\GraceJoyce\iTRAQ\_32\_1.raw]

Data File:Submitted from 20120508-1(merge) by Mascot Daemon on JOYCE-VAIO

Monoisotopic mass of neutral peptide Mr(calc): 2302.143

Variable modifications:

Ions Score: 72.6 Expect: 0.000

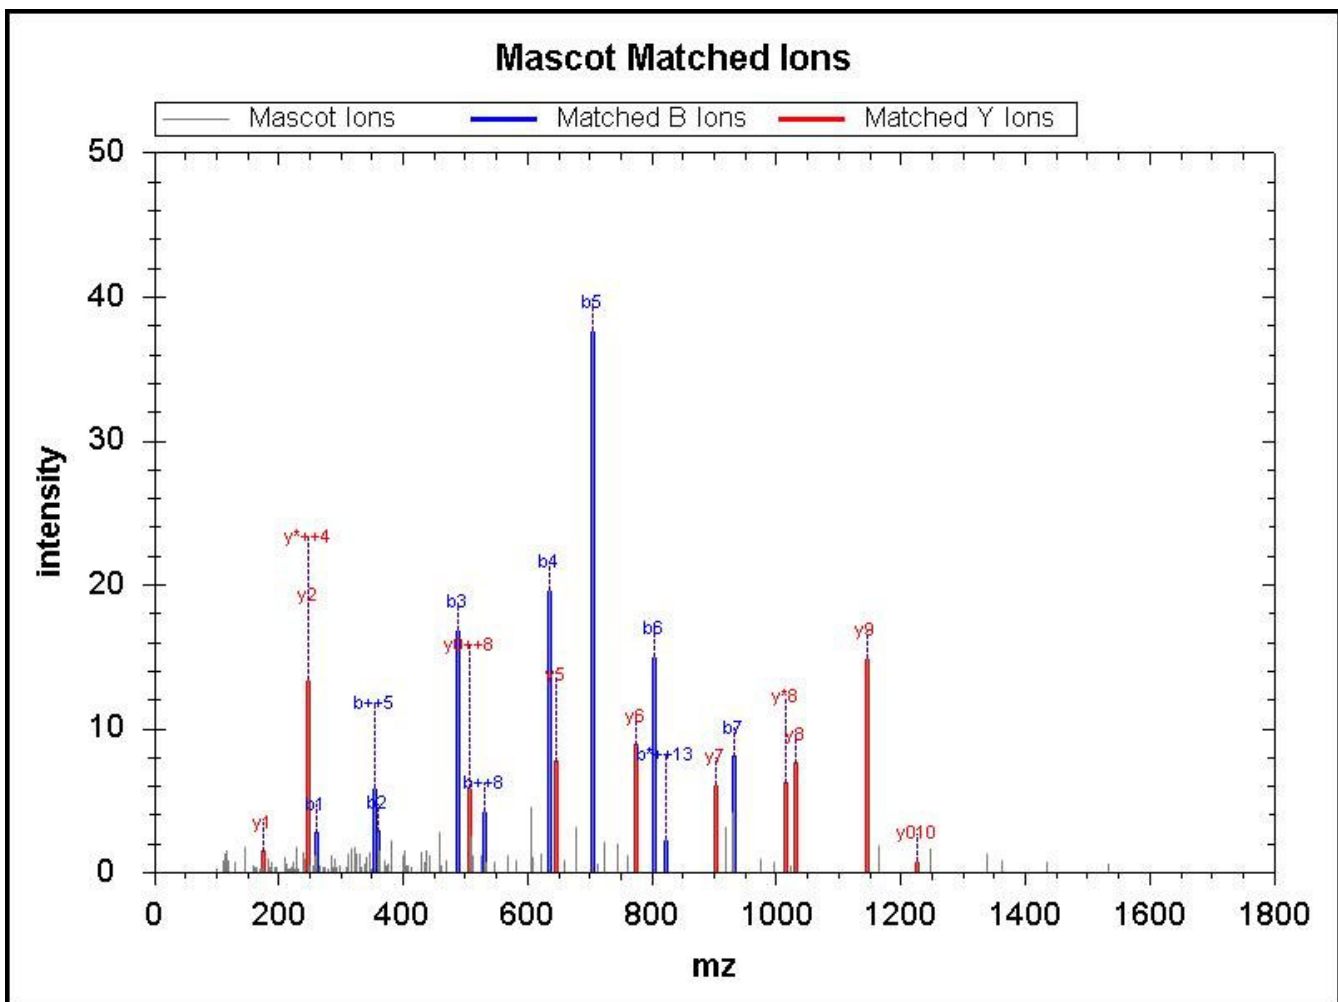

| No | b      | b++    | b* | b*++ | b0     | b0++   | Seq | y        | y++      | y*       | y*++     | y0       | y0++     | RevNo |
|----|--------|--------|----|------|--------|--------|-----|----------|----------|----------|----------|----------|----------|-------|
| 1  | 260.14 | 130.57 |    |      | 242.13 | 121.57 | D   |          |          |          |          |          |          | 18    |
| 2  | 359.20 | 180.11 |    |      | 341.19 | 171.10 | V   | 2,044.02 | 1,022.52 | 2,027.00 | 1,014.00 | 2,026.01 | 1,013.51 | 17    |

|    |          |          |          |          |          |          |   |          |        |          |        |          |        |    |
|----|----------|----------|----------|----------|----------|----------|---|----------|--------|----------|--------|----------|--------|----|
| 3  | 487.26   | 244.14   | 470.24   | 235.62   | 469.25   | 235.13   | Q | 1,944.96 | 972.98 | 1,927.93 | 964.47 | 1,926.95 | 963.98 | 16 |
| 4  | 634.33   | 317.67   | 617.31   | 309.16   | 616.32   | 308.66   | F | 1,816.90 | 908.95 | 1,799.87 | 900.44 | 1,798.89 | 899.95 | 15 |
| 5  | 705.37   | 353.19   | 688.34   | 344.67   | 687.36   | 344.18   | A | 1,669.83 | 835.42 | 1,652.80 | 826.91 | 1,651.82 | 826.41 | 14 |
| 6  | 804.44   | 402.72   | 787.41   | 394.21   | 786.43   | 393.72   | V | 1,598.79 | 799.90 | 1,581.77 | 791.39 | 1,580.78 | 790.89 | 13 |
| 7  | 932.50   | 466.75   | 915.47   | 458.24   | 914.49   | 457.75   | Q | 1,499.72 | 750.37 | 1,482.70 | 741.85 | 1,481.71 | 741.36 | 12 |
| 8  | 1,060.55 | 530.78   | 1,043.53 | 522.27   | 1,042.54 | 521.78   | Q | 1,371.67 | 686.34 | 1,354.64 | 677.82 | 1,353.65 | 677.33 | 11 |
| 9  | 1,159.62 | 580.32   | 1,142.60 | 571.80   | 1,141.61 | 571.31   | V | 1,243.61 | 622.31 | 1,226.58 | 613.79 | 1,225.60 | 613.30 | 10 |
| 10 | 1,272.71 | 636.86   | 1,255.68 | 628.34   | 1,254.70 | 627.85   | L | 1,144.54 | 572.77 | 1,127.51 | 564.26 | 1,126.53 | 563.77 | 9  |
| 11 | 1,400.77 | 700.89   | 1,383.74 | 692.37   | 1,382.75 | 691.88   | Q | 1,031.45 | 516.23 | 1,014.43 | 507.72 | 1,013.44 | 507.23 | 8  |
| 12 | 1,529.81 | 765.41   | 1,512.78 | 756.89   | 1,511.80 | 756.40   | E | 903.40   | 452.20 | 886.37   | 443.69 | 885.38   | 443.20 | 7  |
| 13 | 1,658.85 | 829.93   | 1,641.82 | 821.42   | 1,640.84 | 820.92   | E | 774.35   | 387.68 | 757.33   | 379.17 | 756.34   | 378.67 | 6  |
| 14 | 1,795.91 | 898.46   | 1,778.88 | 889.95   | 1,777.90 | 889.45   | H | 645.31   | 323.16 | 628.28   | 314.65 | 627.30   | 314.15 | 5  |
| 15 | 1,942.98 | 971.99   | 1,925.95 | 963.48   | 1,924.97 | 962.99   | F | 508.25   | 254.63 | 491.22   | 246.12 | 490.24   | 245.62 | 4  |
| 16 | 2,058.00 | 1,029.51 | 2,040.98 | 1,020.99 | 2,039.99 | 1,020.50 | D | 361.18   | 181.10 | 344.16   | 172.58 | 343.17   | 172.09 | 3  |
| 17 | 2,129.04 | 1,065.02 | 2,112.02 | 1,056.51 | 2,111.03 | 1,056.02 | A | 246.16   | 123.58 | 229.13   | 115.07 |          |        | 2  |
| 18 |          |          |          |          |          |          | R | 175.12   | 88.06  | 158.09   | 79.55  |          |        | 1  |

Query 64045 Hit 1

MS/MS Fragmentation of **SAFLLQNLLVGHPEHK**

Found in **sp|Q9NZL4|HBPB1\_HUMAN**, Hsp70-binding protein 1 OS=Homo sapiens GN=HSPBP1 PE=1 SV=1

Match to Query 64045: 2090.196from(697.7391,3+)

Title: 652: Scan 1803 (rt=48.8846, f=2, i=316) [D:\lab212\membrane\Grace\Joyce\iTRAQ\_48\_1.raw]

Data File: Submitted from 20120508-1(merge) by Mascot Daemon on JOYCE-VAIO

Monoisotopic mass of neutral peptide Mr(calc): 2090.196

Variable modifications:

K16 iTRAQ4plex (K)

Ions Score: 72.32 Expect: 0.000



Variable modifications:  
 K18 iTRAQ4plex (K)  
 Ions Score: 72.24 Expect: 0.000

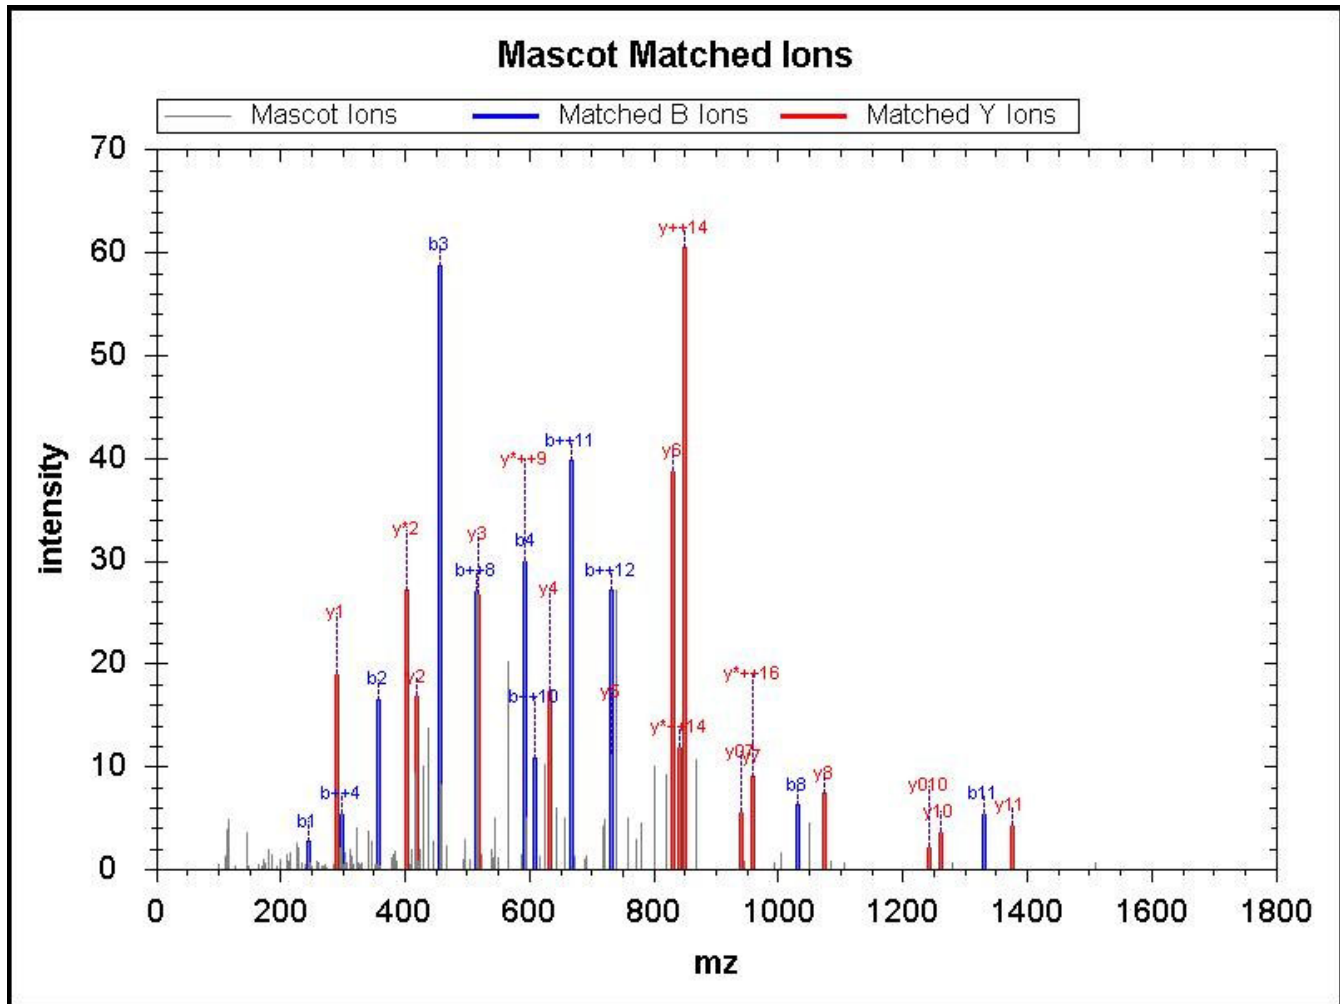

| No | b        | b++      | b*       | b*++   | b0       | b0++   | Seq | y        | y++      | y*       | y*++     | y0       | y0++     | RevNo |
|----|----------|----------|----------|--------|----------|--------|-----|----------|----------|----------|----------|----------|----------|-------|
| 1  | 244.18   | 122.59   |          |        |          |        | V   |          |          |          |          |          |          | 18    |
| 2  | 357.26   | 179.13   |          |        |          |        | L   | 2,046.06 | 1,023.53 | 2,029.04 | 1,015.02 | 2,028.05 | 1,014.53 | 17    |
| 3  | 456.33   | 228.67   |          |        |          |        | V   | 1,932.98 | 966.99   | 1,915.95 | 958.48   | 1,914.97 | 957.99   | 16    |
| 4  | 593.39   | 297.20   |          |        |          |        | H   | 1,833.91 | 917.46   | 1,816.88 | 908.95   | 1,815.90 | 908.45   | 15    |
| 5  | 690.44   | 345.72   |          |        |          |        | P   | 1,696.85 | 848.93   | 1,679.82 | 840.42   | 1,678.84 | 839.92   | 14    |
| 6  | 787.49   | 394.25   |          |        |          |        | P   | 1,599.80 | 800.40   | 1,582.77 | 791.89   | 1,581.79 | 791.40   | 13    |
| 7  | 915.55   | 458.28   | 898.53   | 449.77 |          |        | Q   | 1,502.75 | 751.88   | 1,485.72 | 743.36   | 1,484.73 | 742.87   | 12    |
| 8  | 1,030.58 | 515.79   | 1,013.55 | 507.28 | 1,012.57 | 506.79 | D   | 1,374.69 | 687.85   | 1,357.66 | 679.33   | 1,356.68 | 678.84   | 11    |
| 9  | 1,087.60 | 544.30   | 1,070.58 | 535.79 | 1,069.59 | 535.30 | G   | 1,259.66 | 630.33   | 1,242.63 | 621.82   | 1,241.65 | 621.33   | 10    |
| 10 | 1,216.64 | 608.83   | 1,199.62 | 600.31 | 1,198.63 | 599.82 | E   | 1,202.64 | 601.82   | 1,185.61 | 593.31   | 1,184.63 | 592.82   | 9     |
| 11 | 1,331.67 | 666.34   | 1,314.64 | 657.83 | 1,313.66 | 657.33 | D   | 1,073.60 | 537.30   | 1,056.57 | 528.79   | 1,055.59 | 528.30   | 8     |
| 12 | 1,460.71 | 730.86   | 1,443.69 | 722.35 | 1,442.70 | 721.86 | E   | 958.57   | 479.79   | 941.54   | 471.27   | 940.56   | 470.78   | 7     |
| 13 | 1,557.77 | 779.39   | 1,540.74 | 770.87 | 1,539.76 | 770.38 | P   | 829.53   | 415.27   | 812.50   | 406.75   | 811.52   | 406.26   | 6     |
| 14 | 1,658.81 | 829.91   | 1,641.79 | 821.40 | 1,640.80 | 820.91 | T   | 732.47   | 366.74   | 715.45   | 358.23   | 714.46   | 357.74   | 5     |
| 15 | 1,771.90 | 886.45   | 1,754.87 | 877.94 | 1,753.89 | 877.45 | L   | 631.43   | 316.22   | 614.40   | 307.70   |          |          | 4     |
| 16 | 1,870.97 | 935.99   | 1,853.94 | 927.47 | 1,852.96 | 926.98 | V   | 518.34   | 259.67   | 501.32   | 251.16   |          |          | 3     |
| 17 | 1,999.03 | 1,000.02 | 1,982.00 | 991.50 | 1,981.01 | 991.01 | Q   | 419.27   | 210.14   | 402.25   | 201.63   |          |          | 2     |
| 18 |          |          |          |        |          |        | K   | 291.21   | 146.11   | 274.19   | 137.60   |          |          | 1     |

Query 12562 Hit 1

MS/MS Fragmentation of **SMLALLGR**



Ions Score: 71.7 Expect: 0.000

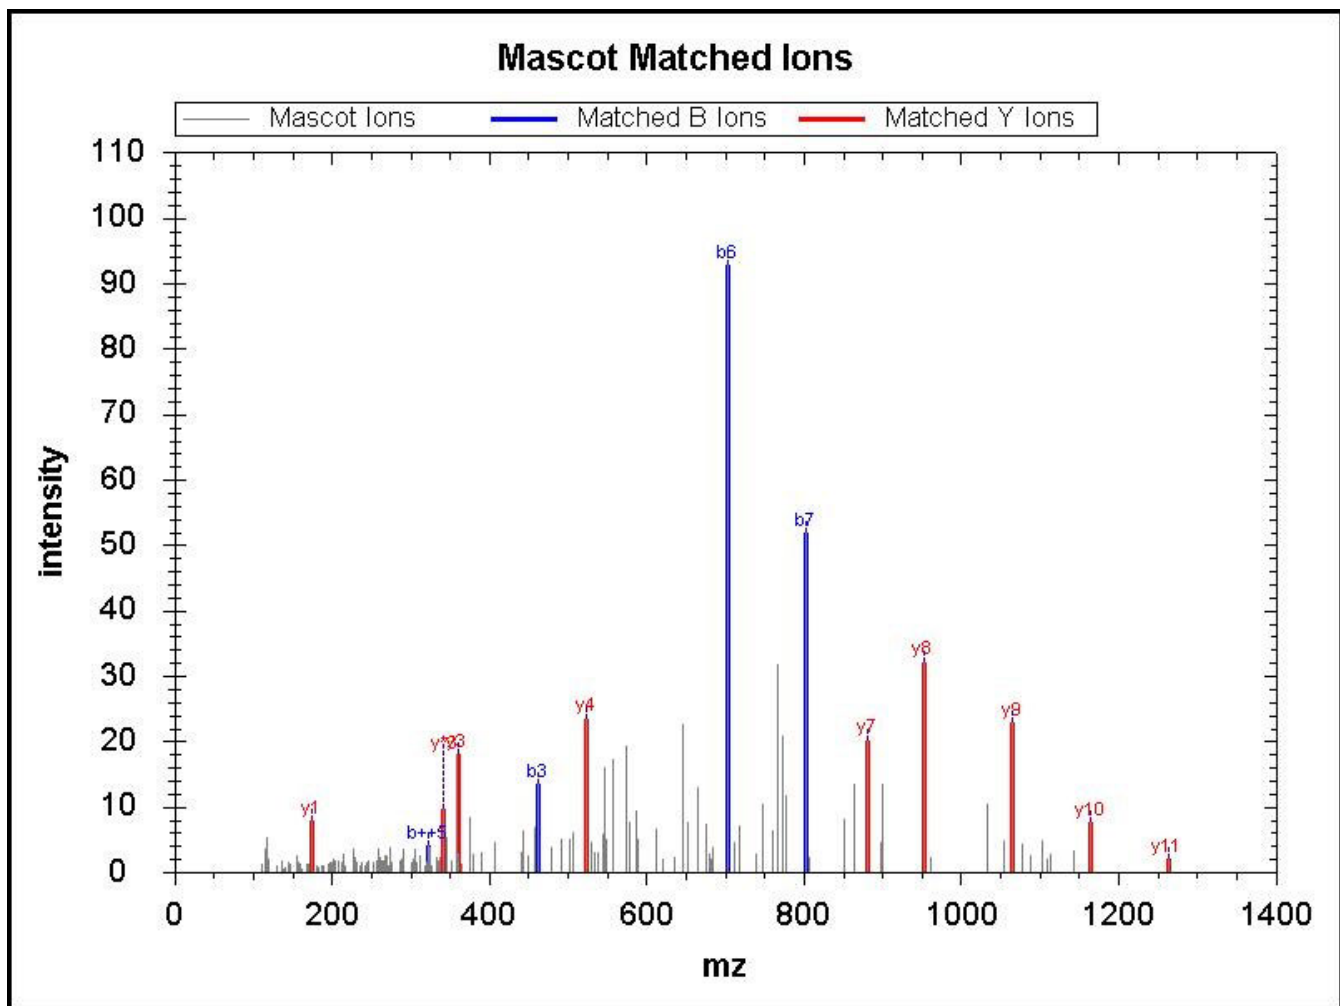

| No | b        | b++    | b*       | b*++   | b0       | b0++   | Seq | y        | y++    | y*       | y*++   | y0       | y0++   | RevNo |
|----|----------|--------|----------|--------|----------|--------|-----|----------|--------|----------|--------|----------|--------|-------|
| 1  | 259.15   | 130.08 | 242.13   | 121.57 |          |        | N   |          |        |          |        |          |        | 17    |
| 2  | 374.18   | 187.59 | 357.15   | 179.08 | 356.17   | 178.59 | D   | 1,705.84 | 853.42 | 1,688.81 | 844.91 | 1,687.83 | 844.42 | 16    |
| 3  | 461.21   | 231.11 | 444.18   | 222.60 | 443.20   | 222.10 | S   | 1,590.81 | 795.91 | 1,573.79 | 787.40 | 1,572.80 | 786.90 | 15    |
| 4  | 574.30   | 287.65 | 557.27   | 279.14 | 556.28   | 278.65 | L   | 1,503.78 | 752.39 | 1,486.75 | 743.88 | 1,485.77 | 743.39 | 14    |
| 5  | 645.33   | 323.17 | 628.31   | 314.66 | 627.32   | 314.16 | A   | 1,390.70 | 695.85 | 1,373.67 | 687.34 | 1,372.69 | 686.85 | 13    |
| 6  | 702.35   | 351.68 | 685.33   | 343.17 | 684.34   | 342.68 | G   | 1,319.66 | 660.33 | 1,302.63 | 651.82 | 1,301.65 | 651.33 | 12    |
| 7  | 801.42   | 401.21 | 784.40   | 392.70 | 783.41   | 392.21 | V   | 1,262.64 | 631.82 | 1,245.61 | 623.31 | 1,244.63 | 622.82 | 11    |
| 8  | 900.49   | 450.75 | 883.46   | 442.24 | 882.48   | 441.74 | V   | 1,163.57 | 582.29 | 1,146.54 | 573.77 | 1,145.56 | 573.28 | 10    |
| 9  | 1,013.57 | 507.29 | 996.55   | 498.78 | 995.56   | 498.29 | I   | 1,064.50 | 532.75 | 1,047.47 | 524.24 | 1,046.49 | 523.75 | 9     |
| 10 | 1,084.61 | 542.81 | 1,067.59 | 534.30 | 1,066.60 | 533.80 | A   | 951.42   | 476.21 | 934.39   | 467.70 | 933.41   | 467.21 | 8     |
| 11 | 1,199.64 | 600.32 | 1,182.61 | 591.81 | 1,181.63 | 591.32 | D   | 880.38   | 440.69 | 863.35   | 432.18 | 862.37   | 431.69 | 7     |
| 12 | 1,313.68 | 657.34 | 1,296.66 | 648.83 | 1,295.67 | 648.34 | N   | 765.35   | 383.18 | 748.33   | 374.67 | 747.34   | 374.17 | 6     |
| 13 | 1,442.72 | 721.87 | 1,425.70 | 713.35 | 1,424.71 | 712.86 | E   | 651.31   | 326.16 | 634.28   | 317.65 | 633.30   | 317.15 | 5     |
| 14 | 1,605.79 | 803.40 | 1,588.76 | 794.88 | 1,587.78 | 794.39 | Y   | 522.27   | 261.64 | 505.24   | 253.12 | 504.26   | 252.63 | 4     |
| 15 | 1,702.84 | 851.92 | 1,685.81 | 843.41 | 1,684.83 | 842.92 | P   | 359.20   | 180.11 | 342.18   | 171.59 | 341.19   | 171.10 | 3     |
| 16 | 1,789.87 | 895.44 | 1,772.85 | 886.93 | 1,771.86 | 886.43 | S   | 262.15   | 131.58 | 245.12   | 123.07 | 244.14   | 122.57 | 2     |
| 17 |          |        |          |        |          |        | R   | 175.12   | 88.06  | 158.09   | 79.55  |          |        | 1     |

Query 74286 Hit 1

MS/MS Fragmentation of **QLLGHMEDLEGDAQSVLDAR**

Found in **sp|Q9NX46|ARHL2\_HUMAN**, Poly(ADP-ribose) glycohydrolase ARH3 OS=Homo sapiens GN=ADPRHL2 PE=1 SV=1  
 Match to Query 74286: 2340.152from(781.058,3+)

Title: 846: Scan 1900 (rt=52.1799, f=2, i=296) [D:\lab212\membrane\Grace\Joyce\iTRAQ\_33\_1.raw]

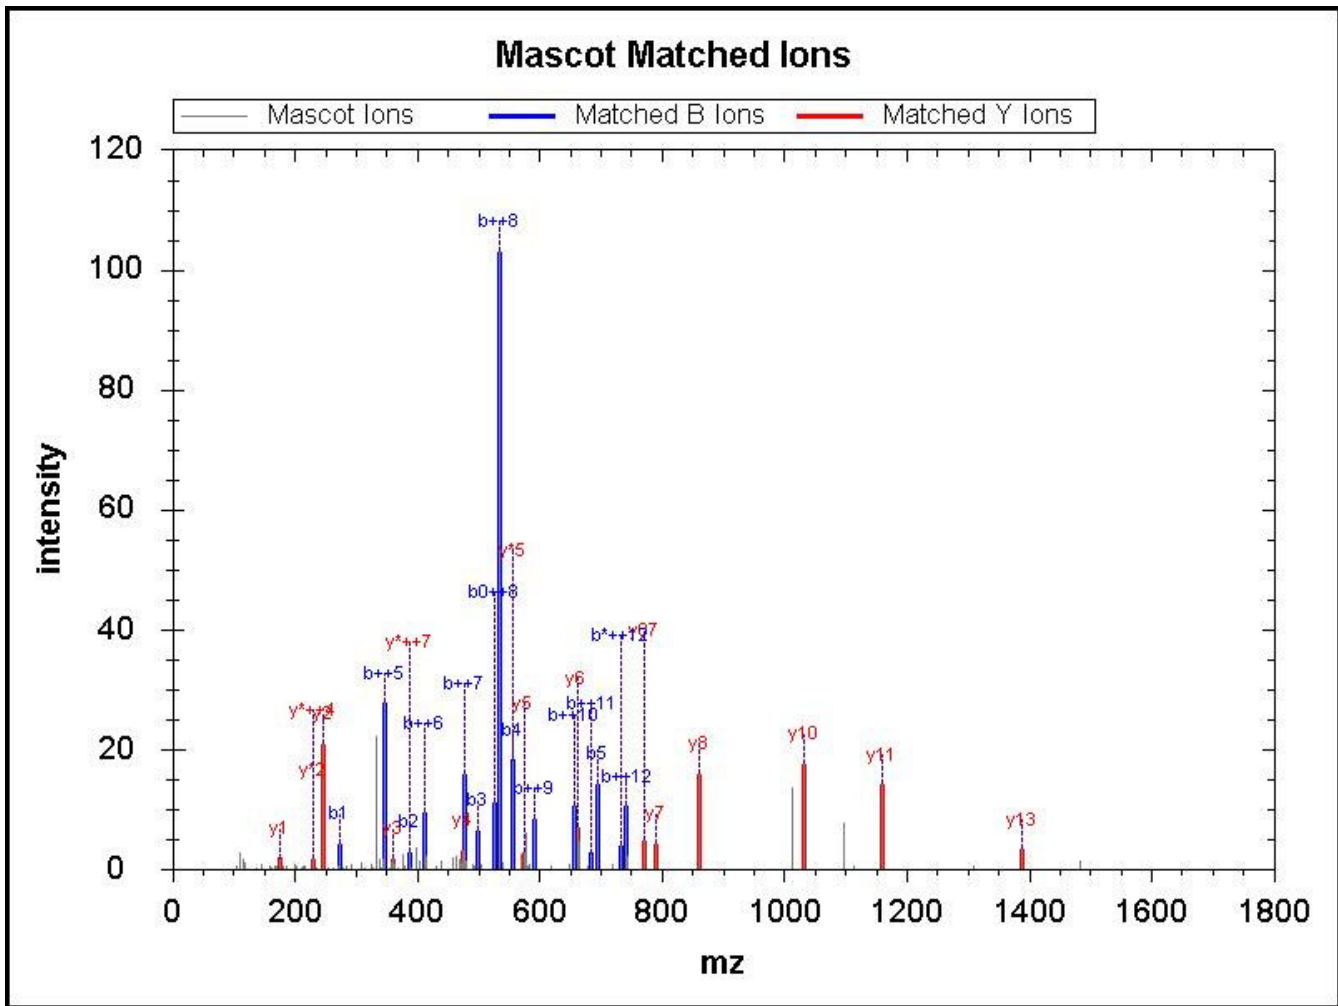

| No | b        | b++      | b*       | b*++     | b0       | b0++     | Seq | y        | y++      | y*       | y*++     | y0       | y0++     | RevNo |
|----|----------|----------|----------|----------|----------|----------|-----|----------|----------|----------|----------|----------|----------|-------|
| 1  | 273.17   | 137.09   | 256.14   | 128.57   |          |          | Q   |          |          |          |          |          |          | 20    |
| 2  | 386.25   | 193.63   | 369.23   | 185.12   |          |          | L   | 2,069.00 | 1,035.00 | 2,051.97 | 1,026.49 | 2,050.99 | 1,026.00 | 19    |
| 3  | 499.34   | 250.17   | 482.31   | 241.66   |          |          | L   | 1,955.91 | 978.46   | 1,938.89 | 969.95   | 1,937.90 | 969.45   | 18    |
| 4  | 556.36   | 278.68   | 539.33   | 270.17   |          |          | G   | 1,842.83 | 921.92   | 1,825.80 | 913.40   | 1,824.82 | 912.91   | 17    |
| 5  | 693.42   | 347.21   | 676.39   | 338.70   |          |          | H   | 1,785.81 | 893.41   | 1,768.78 | 884.89   | 1,767.80 | 884.40   | 16    |
| 6  | 824.46   | 412.73   | 807.43   | 404.22   |          |          | M   | 1,648.75 | 824.88   | 1,631.72 | 816.36   | 1,630.74 | 815.87   | 15    |
| 7  | 953.50   | 477.25   | 936.47   | 468.74   | 935.49   | 468.25   | E   | 1,517.71 | 759.36   | 1,500.68 | 750.84   | 1,499.70 | 750.35   | 14    |
| 8  | 1,068.53 | 534.77   | 1,051.50 | 526.25   | 1,050.52 | 525.76   | D   | 1,388.67 | 694.84   | 1,371.64 | 686.32   | 1,370.65 | 685.83   | 13    |
| 9  | 1,181.61 | 591.31   | 1,164.58 | 582.80   | 1,163.60 | 582.30   | L   | 1,273.64 | 637.32   | 1,256.61 | 628.81   | 1,255.63 | 628.32   | 12    |
| 10 | 1,310.65 | 655.83   | 1,293.63 | 647.32   | 1,292.64 | 646.82   | E   | 1,160.55 | 580.78   | 1,143.53 | 572.27   | 1,142.54 | 571.78   | 11    |
| 11 | 1,367.67 | 684.34   | 1,350.65 | 675.83   | 1,349.66 | 675.34   | G   | 1,031.51 | 516.26   | 1,014.49 | 507.75   | 1,013.50 | 507.25   | 10    |
| 12 | 1,482.70 | 741.85   | 1,465.68 | 733.34   | 1,464.69 | 732.85   | D   | 974.49   | 487.75   | 957.46   | 479.24   | 956.48   | 478.74   | 9     |
| 13 | 1,553.74 | 777.37   | 1,536.71 | 768.86   | 1,535.73 | 768.37   | A   | 859.46   | 430.24   | 842.44   | 421.72   | 841.45   | 421.23   | 8     |
| 14 | 1,681.80 | 841.40   | 1,664.77 | 832.89   | 1,663.79 | 832.40   | Q   | 788.43   | 394.72   | 771.40   | 386.20   | 770.42   | 385.71   | 7     |
| 15 | 1,768.83 | 884.92   | 1,751.80 | 876.41   | 1,750.82 | 875.91   | S   | 660.37   | 330.69   | 643.34   | 322.17   | 642.36   | 321.68   | 6     |
| 16 | 1,867.90 | 934.45   | 1,850.87 | 925.94   | 1,849.89 | 925.45   | V   | 573.34   | 287.17   | 556.31   | 278.66   | 555.32   | 278.17   | 5     |
| 17 | 1,980.98 | 990.99   | 1,963.96 | 982.48   | 1,962.97 | 981.99   | L   | 474.27   | 237.64   | 457.24   | 229.12   | 456.26   | 228.63   | 4     |
| 18 | 2,096.01 | 1,048.51 | 2,078.98 | 1,039.99 | 2,078.00 | 1,039.50 | D   | 361.18   | 181.10   | 344.16   | 172.58   | 343.17   | 172.09   | 3     |
| 19 | 2,167.05 | 1,084.03 | 2,150.02 | 1,075.51 | 2,149.04 | 1,075.02 | A   | 246.16   | 123.58   | 229.13   | 115.07   |          |          | 2     |
| 20 |          |          |          |          |          |          | R   | 175.12   | 88.06    | 158.09   | 79.55    |          |          | 1     |
