# Supplementary material for: Quantitative Proteomic Analysis of Human Lung Tumor Xenografts Treated with the Ectopic ATP Synthase Inhibitor Citreoviridin
Source: PubMed Central journal article supplement (PMC3749231; doi:10.1371/journal.pone.0070642), 2013-08-21
Supplement: pone.0070642.s022.pdf [file pone.0070642.s022.pdf]

Spectra S5: The information of single-peptide-based protein identifications in the large-scale experiment (part 3).

Query 54670 Hit 1

MS/MS Fragmentation of **EGHLPDLLSMIHIER**

Found in **sp|Q92536|YLAT2\_HUMAN**, Y+L amino acid transporter 2 OS=Homo sapiens GN=SLC7A6 PE=1 SV=3

Match to Query 54670: 1903.011 from(476.76,4+)

Title: 922: Sum of 2 scans in range 2096 (rt=56.6834, f=4, i=636) to 2097 (rt=56.7089, f=4, i=637)

[D:\lab212\membrane\GraceJoyce\47\_1.raw]

Data File:Submitted from 20120508-1(merge) by Mascot Daemon on JOYCE-VAIO

Monoisotopic mass of neutral peptide Mr(calc): 1903.011

Variable modifications:

Ions Score: 70.93 Expect: 0.000

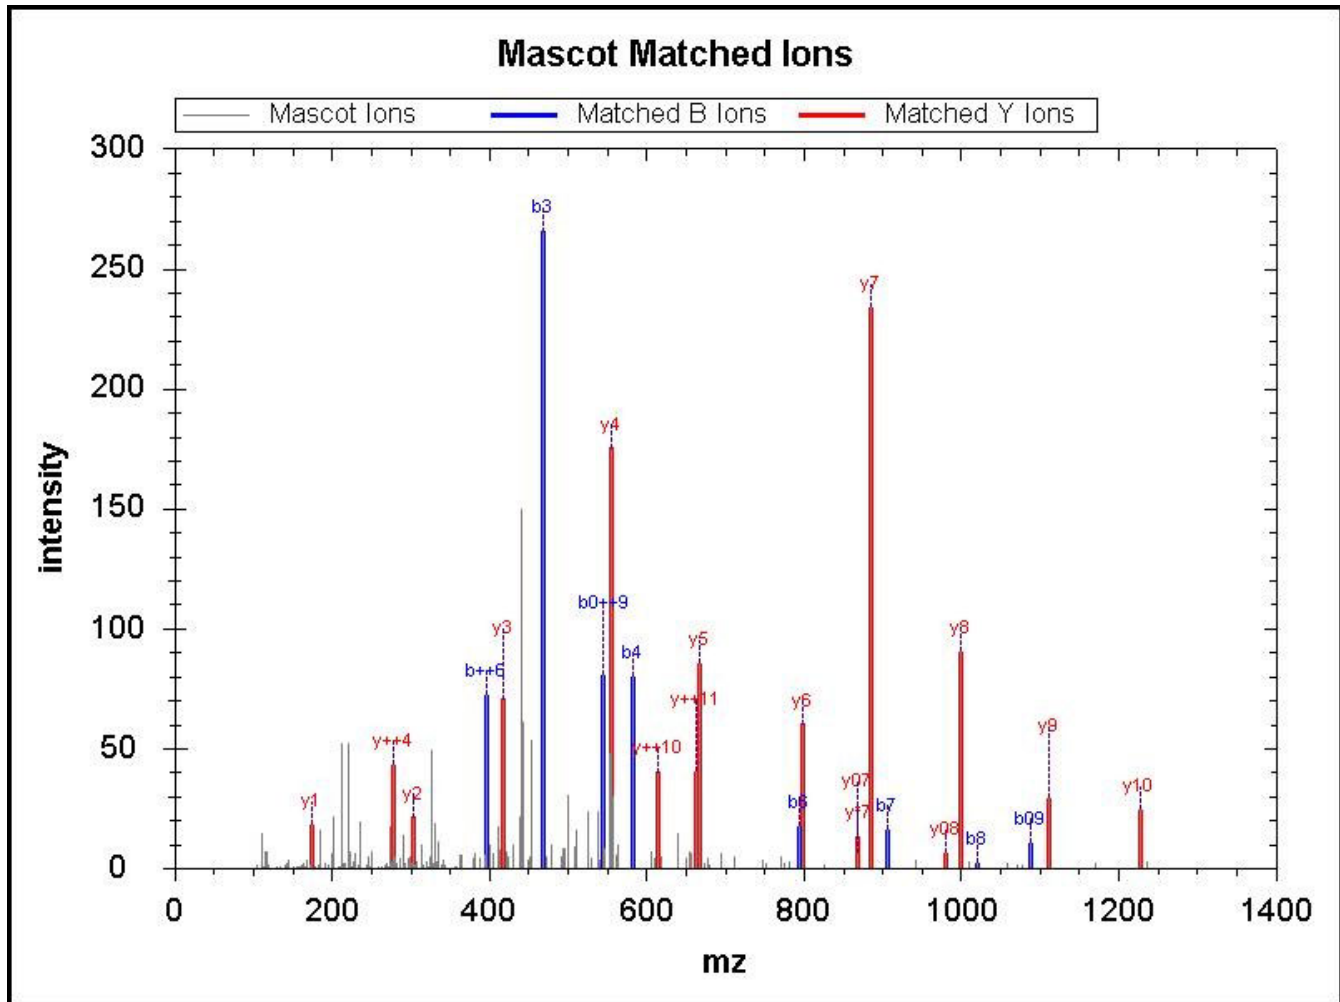

| No | b        | b++    | b0       | b0++   | Seq | y        | y++    | y*       | y*++   | y0       | y0++   | RevNo |
|----|----------|--------|----------|--------|-----|----------|--------|----------|--------|----------|--------|-------|
| 1  | 274.15   | 137.58 | 256.14   | 128.57 | E   |          |        |          |        |          |        | 15    |
| 2  | 331.17   | 166.09 | 313.16   | 157.09 | G   | 1,630.87 | 815.94 | 1,613.85 | 807.43 | 1,612.86 | 806.94 | 14    |
| 3  | 468.23   | 234.62 | 450.22   | 225.61 | H   | 1,573.85 | 787.43 | 1,556.83 | 778.92 | 1,555.84 | 778.42 | 13    |
| 4  | 581.32   | 291.16 | 563.31   | 282.16 | L   | 1,436.79 | 718.90 | 1,419.77 | 710.39 | 1,418.78 | 709.89 | 12    |
| 5  | 678.37   | 339.69 | 660.36   | 330.68 | P   | 1,323.71 | 662.36 | 1,306.68 | 653.84 | 1,305.70 | 653.35 | 11    |
| 6  | 793.40   | 397.20 | 775.39   | 388.20 | D   | 1,226.66 | 613.83 | 1,209.63 | 605.32 | 1,208.65 | 604.83 | 10    |
| 7  | 906.48   | 453.74 | 888.47   | 444.74 | L   | 1,111.63 | 556.32 | 1,094.60 | 547.80 | 1,093.62 | 547.31 | 9     |
| 8  | 1,019.56 | 510.29 | 1,001.55 | 501.28 | L   | 998.55   | 499.78 | 981.52   | 491.26 | 980.53   | 490.77 | 8     |
| 9  | 1,106.60 | 553.80 | 1,088.59 | 544.80 | S   | 885.46   | 443.23 | 868.43   | 434.72 | 867.45   | 434.23 | 7     |
| 10 | 1,237.64 | 619.32 | 1,219.63 | 610.32 | M   | 798.43   | 399.72 | 781.40   | 391.20 | 780.42   | 390.71 | 6     |
| 11 | 1,350.72 | 675.86 | 1,332.71 | 666.86 | I   | 667.39   | 334.20 | 650.36   | 325.68 | 649.38   | 325.19 | 5     |
| 12 | 1,487.78 | 744.39 | 1,469.77 | 735.39 | H   | 554.30   | 277.66 | 537.28   | 269.14 | 536.29   | 268.65 | 4     |
| 13 | 1,600.86 | 800.94 | 1,582.85 | 791.93 | I   | 417.25   | 209.13 | 400.22   | 200.61 | 399.24   | 200.12 | 3     |
| 14 | 1,729.91 | 865.46 | 1,711.90 | 856.45 | E   | 304.16   | 152.58 | 287.13   | 144.07 | 286.15   | 143.58 | 2     |

Query 85369 Hit 1

MS/MS Fragmentation of **LDAVSEVLHSESSVFGQIENHLR**

Found in **sp|P20585|MSH3\_HUMAN**, DNA mismatch repair protein Msh3 OS=Homo sapiens GN=MSH3 PE=1 SV=4

Match to Query 85369: 2709.388from(904.1367,3+)

Title: 1122: Scan 2424 (rt=64.3459, f=2, i=393) [D:\lab212\membrane\Grace\Joyce\iTRAQ\_43\_1.raw]

Data File:Submitted from 20120508-1(merge) by Mascot Daemon on JOYCE-VAIO

Monoisotopic mass of neutral peptide Mr(calc): 2709.388

Variable modifications:

Ions Score: 70.85 Expect: 0.000

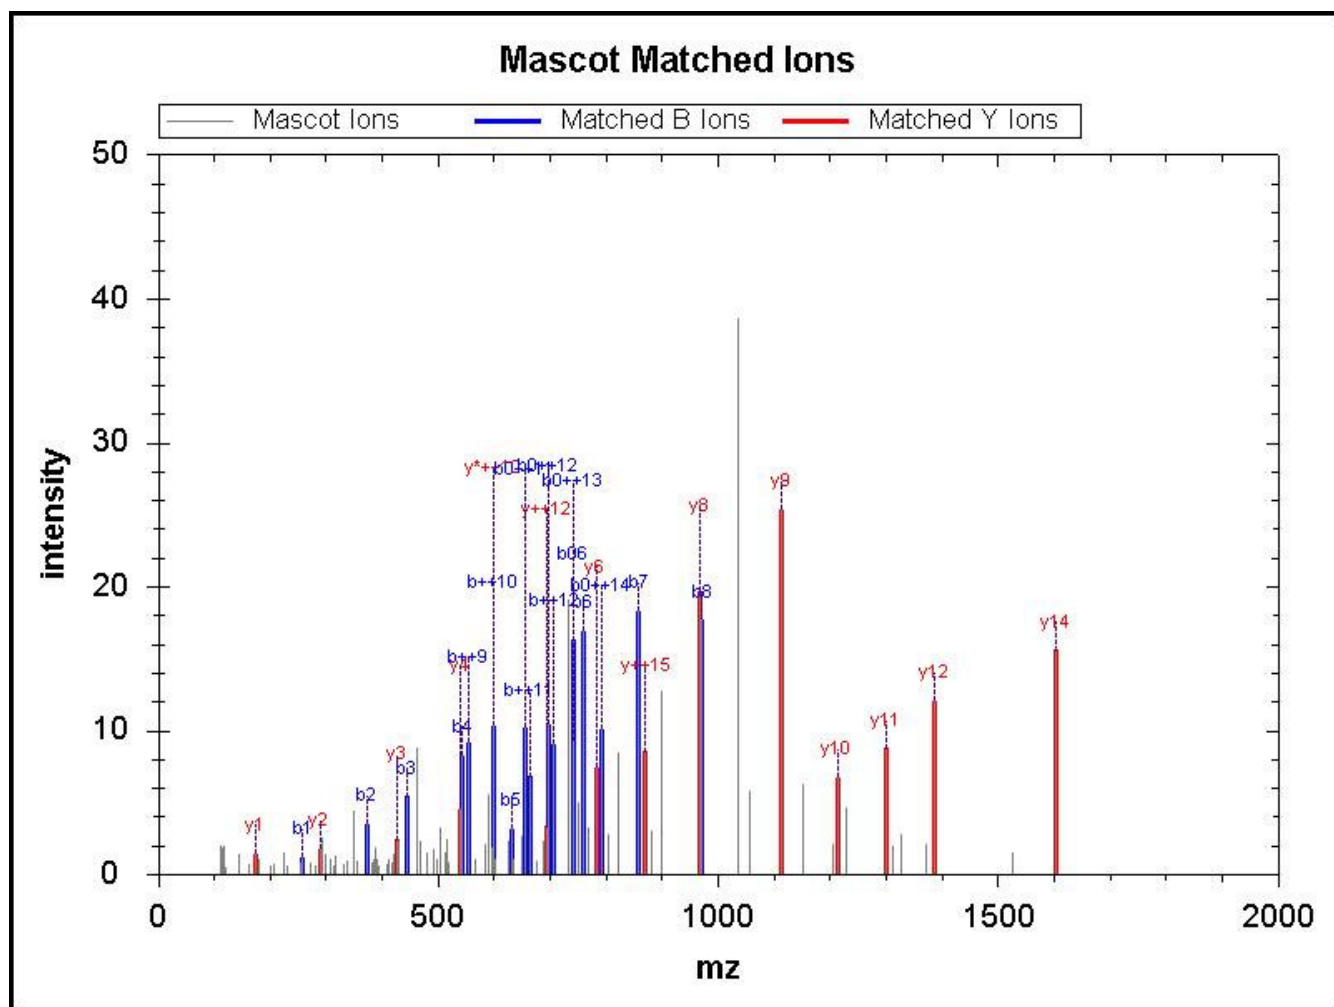

| No | b        | b++    | b* | b*++ | b0       | b0++   | Seq | y        | y++      | y*       | y*++     | y0       | y0++     | RevNo |
|----|----------|--------|----|------|----------|--------|-----|----------|----------|----------|----------|----------|----------|-------|
| 1  | 258.19   | 129.60 |    |      |          |        | L   |          |          |          |          |          |          | 23    |
| 2  | 373.22   | 187.11 |    |      | 355.21   | 178.11 | D   | 2,453.21 | 1,227.11 | 2,436.18 | 1,218.59 | 2,435.19 | 1,218.10 | 22    |
| 3  | 444.26   | 222.63 |    |      | 426.25   | 213.63 | A   | 2,338.18 | 1,169.59 | 2,321.15 | 1,161.08 | 2,320.17 | 1,160.59 | 21    |
| 4  | 543.33   | 272.17 |    |      | 525.32   | 263.16 | V   | 2,267.14 | 1,134.07 | 2,250.11 | 1,125.56 | 2,249.13 | 1,125.07 | 20    |
| 5  | 630.36   | 315.68 |    |      | 612.35   | 306.68 | S   | 2,168.07 | 1,084.54 | 2,151.05 | 1,076.03 | 2,150.06 | 1,075.53 | 19    |
| 6  | 759.40   | 380.20 |    |      | 741.39   | 371.20 | E   | 2,081.04 | 1,041.02 | 2,064.01 | 1,032.51 | 2,063.03 | 1,032.02 | 18    |
| 7  | 858.47   | 429.74 |    |      | 840.46   | 420.73 | V   | 1,952.00 | 976.50   | 1,934.97 | 967.99   | 1,933.99 | 967.50   | 17    |
| 8  | 971.55   | 486.28 |    |      | 953.54   | 477.27 | L   | 1,852.93 | 926.97   | 1,835.90 | 918.46   | 1,834.92 | 917.96   | 16    |
| 9  | 1,108.61 | 554.81 |    |      | 1,090.60 | 545.80 | H   | 1,739.85 | 870.43   | 1,722.82 | 861.91   | 1,721.84 | 861.42   | 15    |
| 10 | 1,195.64 | 598.33 |    |      | 1,177.63 | 589.32 | S   | 1,602.79 | 801.90   | 1,585.76 | 793.38   | 1,584.78 | 792.89   | 14    |
| 11 | 1,324.69 | 662.85 |    |      | 1,306.68 | 653.84 | E   | 1,515.75 | 758.38   | 1,498.73 | 749.87   | 1,497.74 | 749.38   | 13    |
| 12 | 1,411.72 | 706.36 |    |      | 1,393.71 | 697.36 | S   | 1,386.71 | 693.86   | 1,369.69 | 685.35   | 1,368.70 | 684.85   | 12    |
| 13 | 1,498.75 | 749.88 |    |      | 1,480.74 | 740.87 | S   | 1,299.68 | 650.34   | 1,282.65 | 641.83   | 1,281.67 | 641.34   | 11    |

|    |          |          |          |          |          |          |   |          |        |          |        |          |        |    |
|----|----------|----------|----------|----------|----------|----------|---|----------|--------|----------|--------|----------|--------|----|
| 14 | 1,597.82 | 799.41   |          |          | 1,579.81 | 790.41   | V | 1,212.65 | 606.83 | 1,195.62 | 598.31 | 1,194.64 | 597.82 | 10 |
| 15 | 1,744.89 | 872.95   |          |          | 1,726.88 | 863.94   | F | 1,113.58 | 557.29 | 1,096.55 | 548.78 | 1,095.57 | 548.29 | 9  |
| 16 | 1,801.91 | 901.46   |          |          | 1,783.90 | 892.45   | G | 966.51   | 483.76 | 949.48   | 475.25 | 948.50   | 474.75 | 8  |
| 17 | 1,929.97 | 965.49   | 1,912.94 | 956.97   | 1,911.96 | 956.48   | Q | 909.49   | 455.25 | 892.46   | 446.74 | 891.48   | 446.24 | 7  |
| 18 | 2,043.05 | 1,022.03 | 2,026.02 | 1,013.52 | 2,025.04 | 1,013.02 | I | 781.43   | 391.22 | 764.40   | 382.71 | 763.42   | 382.21 | 6  |
| 19 | 2,172.09 | 1,086.55 | 2,155.07 | 1,078.04 | 2,154.08 | 1,077.55 | E | 668.35   | 334.68 | 651.32   | 326.16 | 650.34   | 325.67 | 5  |
| 20 | 2,286.14 | 1,143.57 | 2,269.11 | 1,135.06 | 2,268.13 | 1,134.57 | N | 539.30   | 270.16 | 522.28   | 261.64 |          |        | 4  |
| 21 | 2,423.20 | 1,212.10 | 2,406.17 | 1,203.59 | 2,405.19 | 1,203.10 | H | 425.26   | 213.13 | 408.24   | 204.62 |          |        | 3  |
| 22 | 2,536.28 | 1,268.64 | 2,519.25 | 1,260.13 | 2,518.27 | 1,259.64 | L | 288.20   | 144.61 | 271.18   | 136.09 |          |        | 2  |
| 23 |          |          |          |          |          |          | R | 175.12   | 88.06  | 158.09   | 79.55  |          |        | 1  |

Query 70304 Hit 1

MS/MS Fragmentation of **ERDEDEDGDDGDDGATGK**

Found in **sp|P50579|AMPM2\_HUMAN**, Methionine aminopeptidase 2 OS=Homo sapiens GN=METAP2 PE=1 SV=1

Match to Query 70304: 2239.923from(747.6484,3+)

Title: 24: Sum of 2 scans in range 149 (rt=12.9478, f=4, i=12) to 150 (rt=12.9732, f=4, i=13)

[D:\lab212\membrane\GraceJoyce\iTRAQ\_44\_2.raw]

Data File: Submitted from 20120508-1(merge) by Mascot Daemon on JOYCE-VAIO

Monoisotopic mass of neutral peptide Mr(calc): 2239.923

Variable modifications:

K19 iTRAQ4plex (K)

Ions Score: 70.2 Expect: 0.000

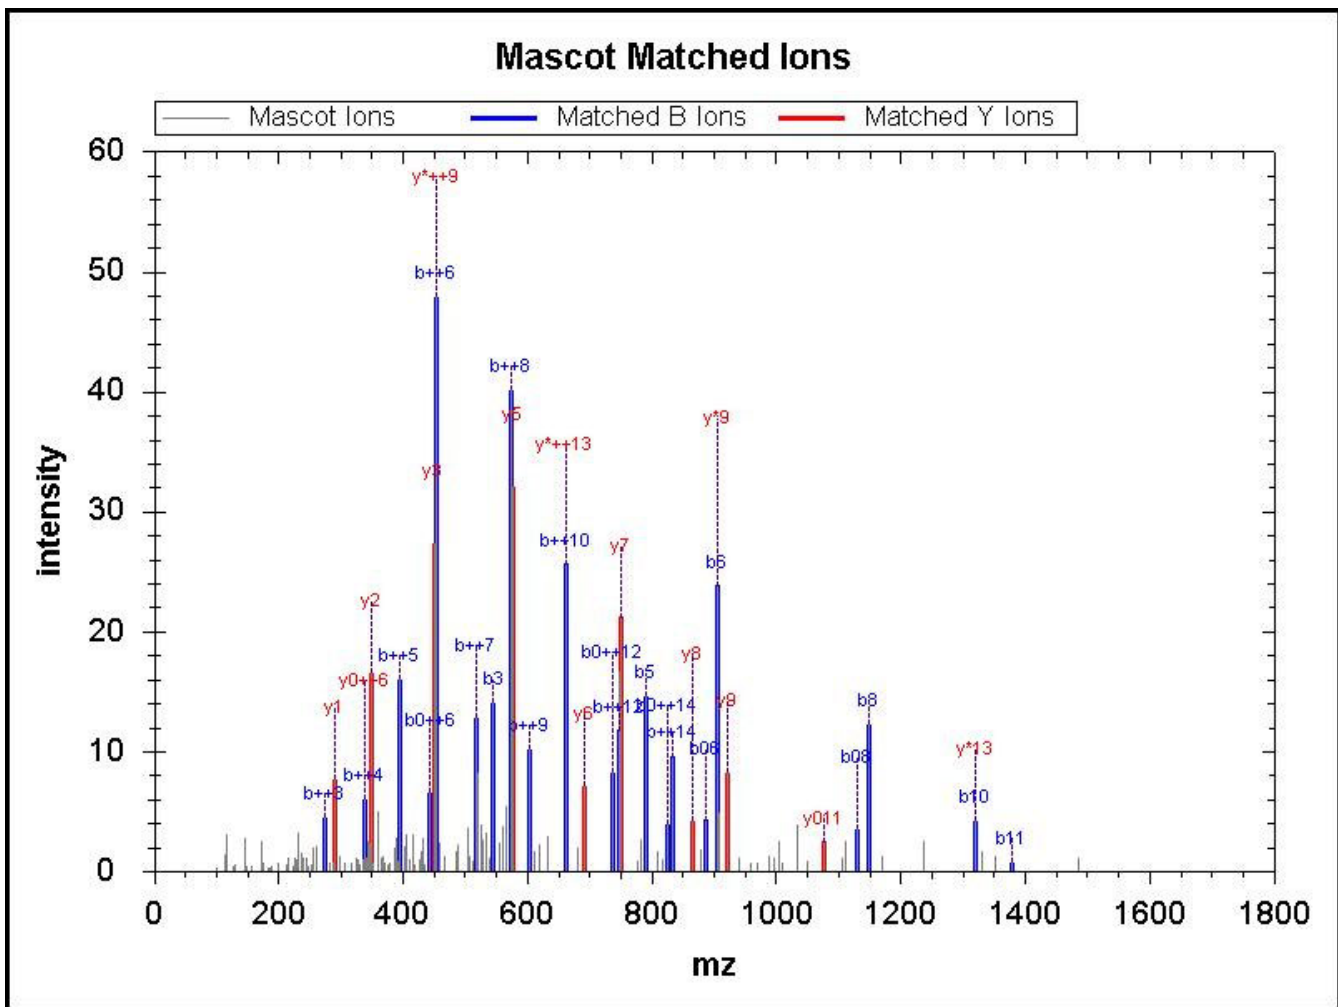

| No | b      | b++    | b*     | b*++   | b0     | b0++   | Seq | y        | y++    | y*       | y*++   | y0       | y0++   | RevNo |
|----|--------|--------|--------|--------|--------|--------|-----|----------|--------|----------|--------|----------|--------|-------|
| 1  | 274.15 | 137.58 |        |        | 256.14 | 128.57 | E   |          |        |          |        |          |        | 19    |
| 2  | 430.25 | 215.63 | 413.23 | 207.12 | 412.24 | 206.62 | R   | 1,967.78 | 984.39 | 1,950.76 | 975.88 | 1,949.77 | 975.39 | 18    |
| 3  | 545.28 | 273.14 | 528.25 | 264.63 | 527.27 | 264.14 | D   | 1,811.68 | 906.34 | 1,794.65 | 897.83 | 1,793.67 | 897.34 | 17    |

|    |          |        |          |        |          |        |   |          |        |          |        |          |        |    |
|----|----------|--------|----------|--------|----------|--------|---|----------|--------|----------|--------|----------|--------|----|
| 4  | 674.32   | 337.66 | 657.30   | 329.15 | 656.31   | 328.66 | E | 1,696.65 | 848.83 | 1,679.63 | 840.32 | 1,678.64 | 839.83 | 16 |
| 5  | 789.35   | 395.18 | 772.32   | 386.67 | 771.34   | 386.17 | D | 1,567.61 | 784.31 | 1,550.58 | 775.80 | 1,549.60 | 775.30 | 15 |
| 6  | 904.38   | 452.69 | 887.35   | 444.18 | 886.37   | 443.69 | D | 1,452.58 | 726.80 | 1,435.56 | 718.28 | 1,434.57 | 717.79 | 14 |
| 7  | 1,033.42 | 517.21 | 1,016.39 | 508.70 | 1,015.41 | 508.21 | E | 1,337.56 | 669.28 | 1,320.53 | 660.77 | 1,319.55 | 660.28 | 13 |
| 8  | 1,148.45 | 574.73 | 1,131.42 | 566.21 | 1,130.44 | 565.72 | D | 1,208.51 | 604.76 | 1,191.49 | 596.25 | 1,190.50 | 595.76 | 12 |
| 9  | 1,205.47 | 603.24 | 1,188.44 | 594.72 | 1,187.46 | 594.23 | G | 1,093.49 | 547.25 | 1,076.46 | 538.73 | 1,075.48 | 538.24 | 11 |
| 10 | 1,320.49 | 660.75 | 1,303.47 | 652.24 | 1,302.48 | 651.75 | D | 1,036.47 | 518.74 | 1,019.44 | 510.22 | 1,018.46 | 509.73 | 10 |
| 11 | 1,377.52 | 689.26 | 1,360.49 | 680.75 | 1,359.51 | 680.26 | G | 921.44   | 461.22 | 904.41   | 452.71 | 903.43   | 452.22 | 9  |
| 12 | 1,492.54 | 746.78 | 1,475.52 | 738.26 | 1,474.53 | 737.77 | D | 864.42   | 432.71 | 847.39   | 424.20 | 846.41   | 423.71 | 8  |
| 13 | 1,549.56 | 775.29 | 1,532.54 | 766.77 | 1,531.55 | 766.28 | G | 749.39   | 375.20 | 732.36   | 366.69 | 731.38   | 366.19 | 7  |
| 14 | 1,664.59 | 832.80 | 1,647.56 | 824.29 | 1,646.58 | 823.79 | D | 692.37   | 346.69 | 675.34   | 338.18 | 674.36   | 337.68 | 6  |
| 15 | 1,721.61 | 861.31 | 1,704.59 | 852.80 | 1,703.60 | 852.30 | G | 577.34   | 289.17 | 560.32   | 280.66 | 559.33   | 280.17 | 5  |
| 16 | 1,792.65 | 896.83 | 1,775.62 | 888.32 | 1,774.64 | 887.82 | A | 520.32   | 260.66 | 503.29   | 252.15 | 502.31   | 251.66 | 4  |
| 17 | 1,893.70 | 947.35 | 1,876.67 | 938.84 | 1,875.69 | 938.35 | T | 449.28   | 225.15 | 432.26   | 216.63 | 431.27   | 216.14 | 3  |
| 18 | 1,950.72 | 975.86 | 1,933.69 | 967.35 | 1,932.71 | 966.86 | G | 348.24   | 174.62 | 331.21   | 166.11 |          |        | 2  |
| 19 |          |        |          |        |          |        | K | 291.21   | 146.11 | 274.19   | 137.60 |          |        | 1  |

Query 60599 Hit 1

MS/MS Fragmentation of **IPEEFNVFNLIQEMR**

Found in **sp|Q05209|PTN12\_HUMAN**, Tyrosine-protein phosphatase non-receptor type 12 OS=Homo sapiens GN=PTPN12 PE=1 SV=3

Match to Query 60599: 2022.039from(1012.027,2+)

Title: 1261: Sum of 2 scans in range 2881 (rt=74.0959, f=4, i=845) to 2882 (rt=74.1214, f=4, i=846)

[D:\lab212\membrane\Grace\Joyce\iTRAQ\_21\_2.raw]

Data File: Submitted from 20120508-1(merge) by Mascot Daemon on JOYCE-VAIO

Monoisotopic mass of neutral peptide Mr(calc): 2022.039

Variable modifications:

Ions Score: 70.06 Expect: 0.000

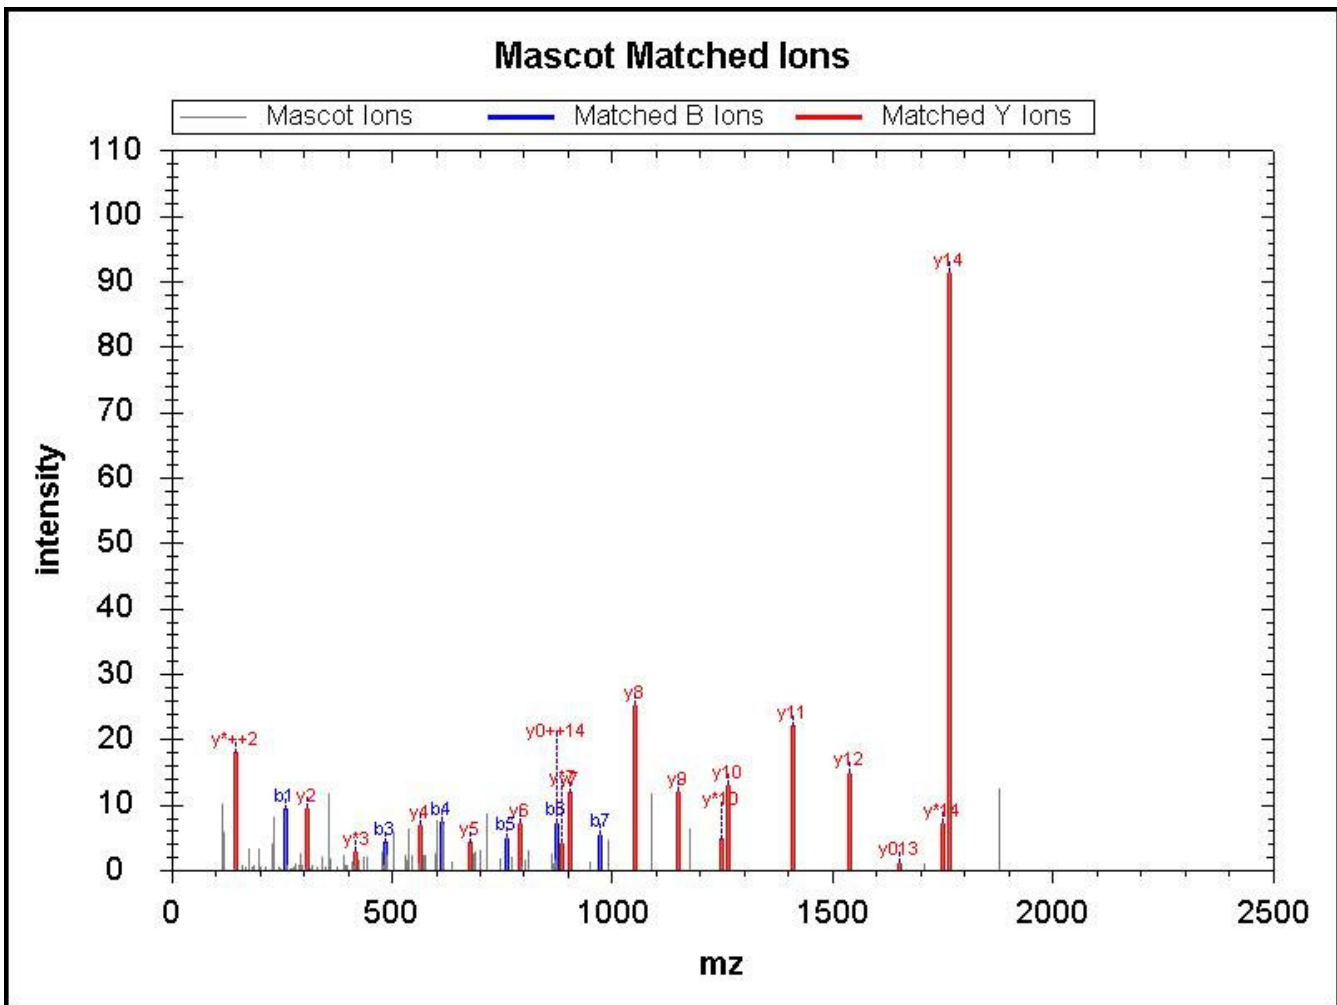

| No | b        | b++    | b*       | b*++   | b0       | b0++   | Seq | y        | y++    | y*       | y*++   | y0       | y0++   | RevNo |
|----|----------|--------|----------|--------|----------|--------|-----|----------|--------|----------|--------|----------|--------|-------|
| 1  | 258.19   | 129.60 |          |        |          |        | I   |          |        |          |        |          |        | 15    |
| 2  | 355.25   | 178.13 |          |        |          |        | P   | 1,765.86 | 883.43 | 1,748.83 | 874.92 | 1,747.85 | 874.43 | 14    |
| 3  | 484.29   | 242.65 |          |        | 466.28   | 233.64 | E   | 1,668.80 | 834.91 | 1,651.78 | 826.39 | 1,650.79 | 825.90 | 13    |
| 4  | 613.33   | 307.17 |          |        | 595.32   | 298.16 | E   | 1,539.76 | 770.38 | 1,522.74 | 761.87 | 1,521.75 | 761.38 | 12    |
| 5  | 760.40   | 380.70 |          |        | 742.39   | 371.70 | F   | 1,410.72 | 705.86 | 1,393.69 | 697.35 | 1,392.71 | 696.86 | 11    |
| 6  | 874.44   | 437.72 | 857.42   | 429.21 | 856.43   | 428.72 | N   | 1,263.65 | 632.33 | 1,246.62 | 623.82 | 1,245.64 | 623.32 | 10    |
| 7  | 973.51   | 487.26 | 956.48   | 478.75 | 955.50   | 478.25 | V   | 1,149.61 | 575.31 | 1,132.58 | 566.79 | 1,131.60 | 566.30 | 9     |
| 8  | 1,120.58 | 560.79 | 1,103.55 | 552.28 | 1,102.57 | 551.79 | F   | 1,050.54 | 525.77 | 1,033.51 | 517.26 | 1,032.53 | 516.77 | 8     |
| 9  | 1,234.62 | 617.81 | 1,217.60 | 609.30 | 1,216.61 | 608.81 | N   | 903.47   | 452.24 | 886.45   | 443.73 | 885.46   | 443.23 | 7     |
| 10 | 1,347.71 | 674.36 | 1,330.68 | 665.84 | 1,329.70 | 665.35 | L   | 789.43   | 395.22 | 772.40   | 386.70 | 771.42   | 386.21 | 6     |
| 11 | 1,460.79 | 730.90 | 1,443.76 | 722.39 | 1,442.78 | 721.89 | I   | 676.34   | 338.68 | 659.32   | 330.16 | 658.33   | 329.67 | 5     |
| 12 | 1,588.85 | 794.93 | 1,571.82 | 786.42 | 1,570.84 | 785.92 | Q   | 563.26   | 282.13 | 546.23   | 273.62 | 545.25   | 273.13 | 4     |
| 13 | 1,717.89 | 859.45 | 1,700.87 | 850.94 | 1,699.88 | 850.44 | E   | 435.20   | 218.10 | 418.18   | 209.59 | 417.19   | 209.10 | 3     |
| 14 | 1,848.93 | 924.97 | 1,831.91 | 916.46 | 1,830.92 | 915.96 | M   | 306.16   | 153.58 | 289.13   | 145.07 |          |        | 2     |
| 15 |          |        |          |        |          |        | R   | 175.12   | 88.06  | 158.09   | 79.55  |          |        | 1     |

Query 73526 Hit 1

MS/MS Fragmentation of **DVEGQDVVEAILAHLNTVPR**

Found in **sp|Q9UNSI|TIM\_HUMAN**, Protein timeless homolog OS=Homo sapiens GN=TIMELESS PE=1 SV=2

Match to Query 73526: 2318.232from(773.7515,3+)

Title: 1113: Sum of 2 scans in range 2514 (rt=65.7559, f=3, i=381) to 2515 (rt=65.7813, f=3, i=382)

[D:\lab212\membrane\GraceJoyce\iTRAQ\_30\_1.raw]

Data File: Submitted from 20120508-1(merge) by Mascot Daemon on JOYCE-VAIO

Monoisotopic mass of neutral peptide Mr(calc): 2318.232

Variable modifications:

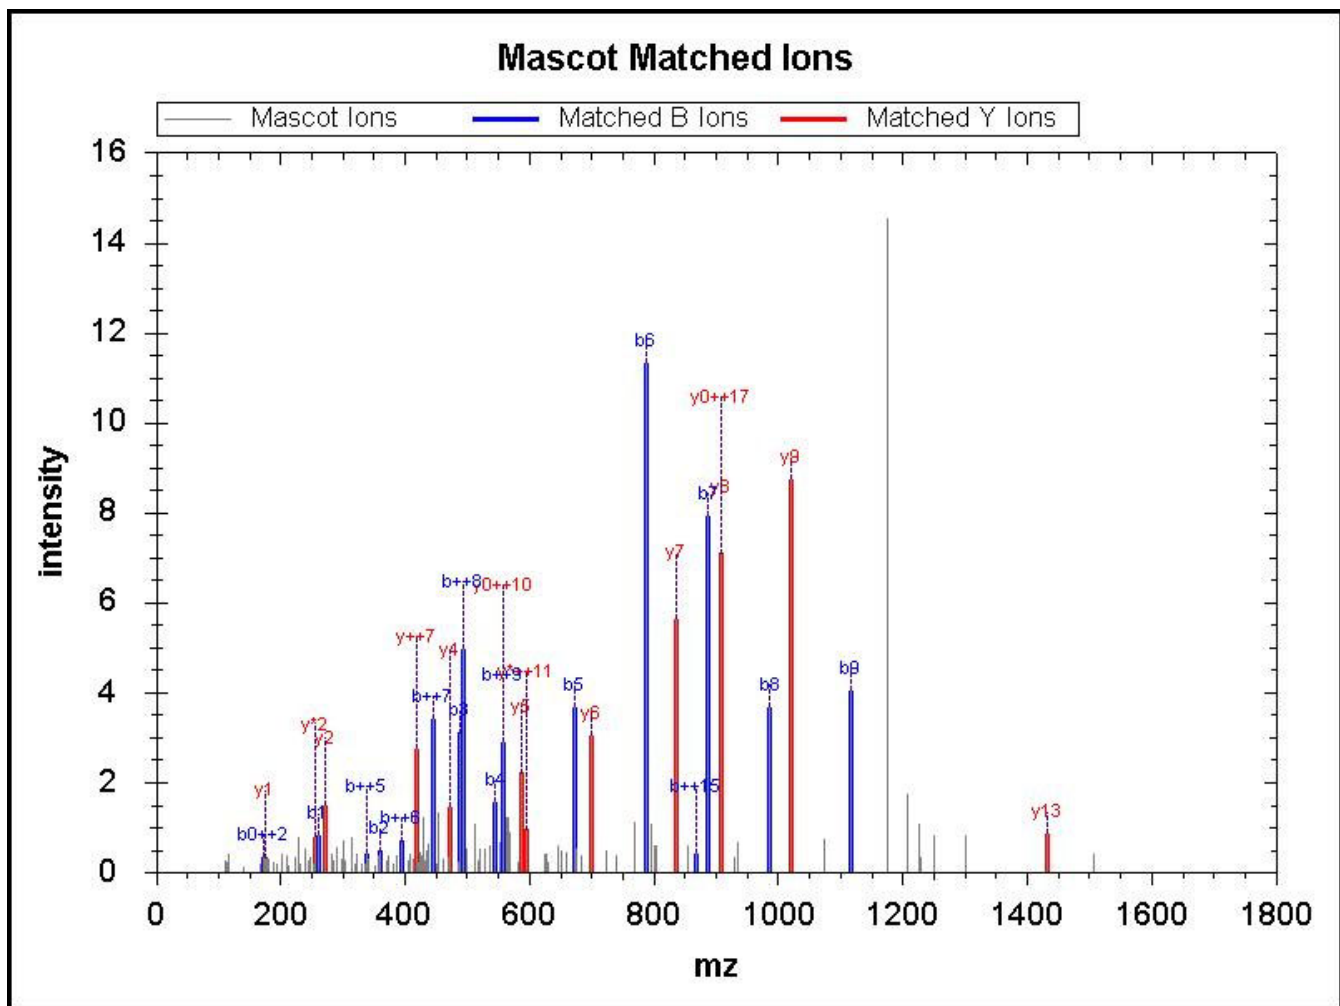

| No | b        | b++      | b*       | b***     | b0       | b0++     | Seq | y        | y++      | y*       | y***     | y0       | y0++     | RevNo |
|----|----------|----------|----------|----------|----------|----------|-----|----------|----------|----------|----------|----------|----------|-------|
| 1  | 260.14   | 130.57   |          |          | 242.13   | 121.57   | D   |          |          |          |          |          |          | 20    |
| 2  | 359.20   | 180.11   |          |          | 341.19   | 171.10   | V   | 2,060.11 | 1,030.56 | 2,043.09 | 1,022.05 | 2,042.10 | 1,021.55 | 19    |
| 3  | 488.25   | 244.63   |          |          | 470.24   | 235.62   | E   | 1,961.04 | 981.03   | 1,944.02 | 972.51   | 1,943.03 | 972.02   | 18    |
| 4  | 545.27   | 273.14   |          |          | 527.26   | 264.13   | G   | 1,832.00 | 916.50   | 1,814.98 | 907.99   | 1,813.99 | 907.50   | 17    |
| 5  | 673.33   | 337.17   | 656.30   | 328.65   | 655.32   | 328.16   | Q   | 1,774.98 | 887.99   | 1,757.95 | 879.48   | 1,756.97 | 878.99   | 16    |
| 6  | 788.35   | 394.68   | 771.33   | 386.17   | 770.34   | 385.68   | D   | 1,646.92 | 823.96   | 1,629.90 | 815.45   | 1,628.91 | 814.96   | 15    |
| 7  | 887.42   | 444.21   | 870.40   | 435.70   | 869.41   | 435.21   | V   | 1,531.90 | 766.45   | 1,514.87 | 757.94   | 1,513.88 | 757.45   | 14    |
| 8  | 986.49   | 493.75   | 969.46   | 485.24   | 968.48   | 484.74   | V   | 1,432.83 | 716.92   | 1,415.80 | 708.40   | 1,414.82 | 707.91   | 13    |
| 9  | 1,115.53 | 558.27   | 1,098.51 | 549.76   | 1,097.52 | 549.27   | E   | 1,333.76 | 667.38   | 1,316.73 | 658.87   | 1,315.75 | 658.38   | 12    |
| 10 | 1,186.57 | 593.79   | 1,169.54 | 585.28   | 1,168.56 | 584.78   | A   | 1,204.72 | 602.86   | 1,187.69 | 594.35   | 1,186.71 | 593.86   | 11    |
| 11 | 1,299.65 | 650.33   | 1,282.63 | 641.82   | 1,281.64 | 641.33   | I   | 1,133.68 | 567.34   | 1,116.65 | 558.83   | 1,115.67 | 558.34   | 10    |
| 12 | 1,412.74 | 706.87   | 1,395.71 | 698.36   | 1,394.73 | 697.87   | L   | 1,020.59 | 510.80   | 1,003.57 | 502.29   | 1,002.58 | 501.80   | 9     |
| 13 | 1,483.78 | 742.39   | 1,466.75 | 733.88   | 1,465.77 | 733.39   | A   | 907.51   | 454.26   | 890.48   | 445.75   | 889.50   | 445.25   | 8     |
| 14 | 1,620.84 | 810.92   | 1,603.81 | 802.41   | 1,602.82 | 801.92   | H   | 836.47   | 418.74   | 819.45   | 410.23   | 818.46   | 409.74   | 7     |
| 15 | 1,733.92 | 867.46   | 1,716.89 | 858.95   | 1,715.91 | 858.46   | L   | 699.41   | 350.21   | 682.39   | 341.70   | 681.40   | 341.21   | 6     |
| 16 | 1,847.96 | 924.48   | 1,830.94 | 915.97   | 1,829.95 | 915.48   | N   | 586.33   | 293.67   | 569.30   | 285.16   | 568.32   | 284.66   | 5     |
| 17 | 1,949.01 | 975.01   | 1,931.98 | 966.50   | 1,931.00 | 966.00   | T   | 472.29   | 236.65   | 455.26   | 228.13   | 454.28   | 227.64   | 4     |
| 18 | 2,048.08 | 1,024.54 | 2,031.05 | 1,016.03 | 2,030.07 | 1,015.54 | V   | 371.24   | 186.12   | 354.21   | 177.61   |          |          | 3     |
| 19 | 2,145.13 | 1,073.07 | 2,128.10 | 1,064.56 | 2,127.12 | 1,064.06 | P   | 272.17   | 136.59   | 255.15   | 128.08   |          |          | 2     |
| 20 |          |          |          |          |          |          | R   | 175.12   | 88.06    | 158.09   | 79.55    |          |          | 1     |

MS/MS Fragmentation of **EKEKEDDEEEEDASGGDQDQEER**

Found in **sp|O60216|RAD21\_HUMAN**, Double-strand-break repair protein rad21 homolog OS=Homo sapiens GN=RAD21 PE=1 SV=2

Match to Query 96608: 3371.417from(843.8616,4+)

Title: 6: Sum of 2 scans in range 281 (rt=15.0451, f=2, i=25) to 282 (rt=15.0705, f=2, i=26)

[D:\lab212\membrane\Grace\Joyce\iTRAQ\_51\_2.raw]

Data File:Submitted from 20120508-1(merge) by Mascot Daemon on JOYCE-VAIO

Monoisotopic mass of neutral peptide Mr(calc): 3371.417

Variable modifications:

K2 iTRAQ4plex (K)

K4 iTRAQ4plex (K)

Ions Score: 69.77 Expect: 0.000

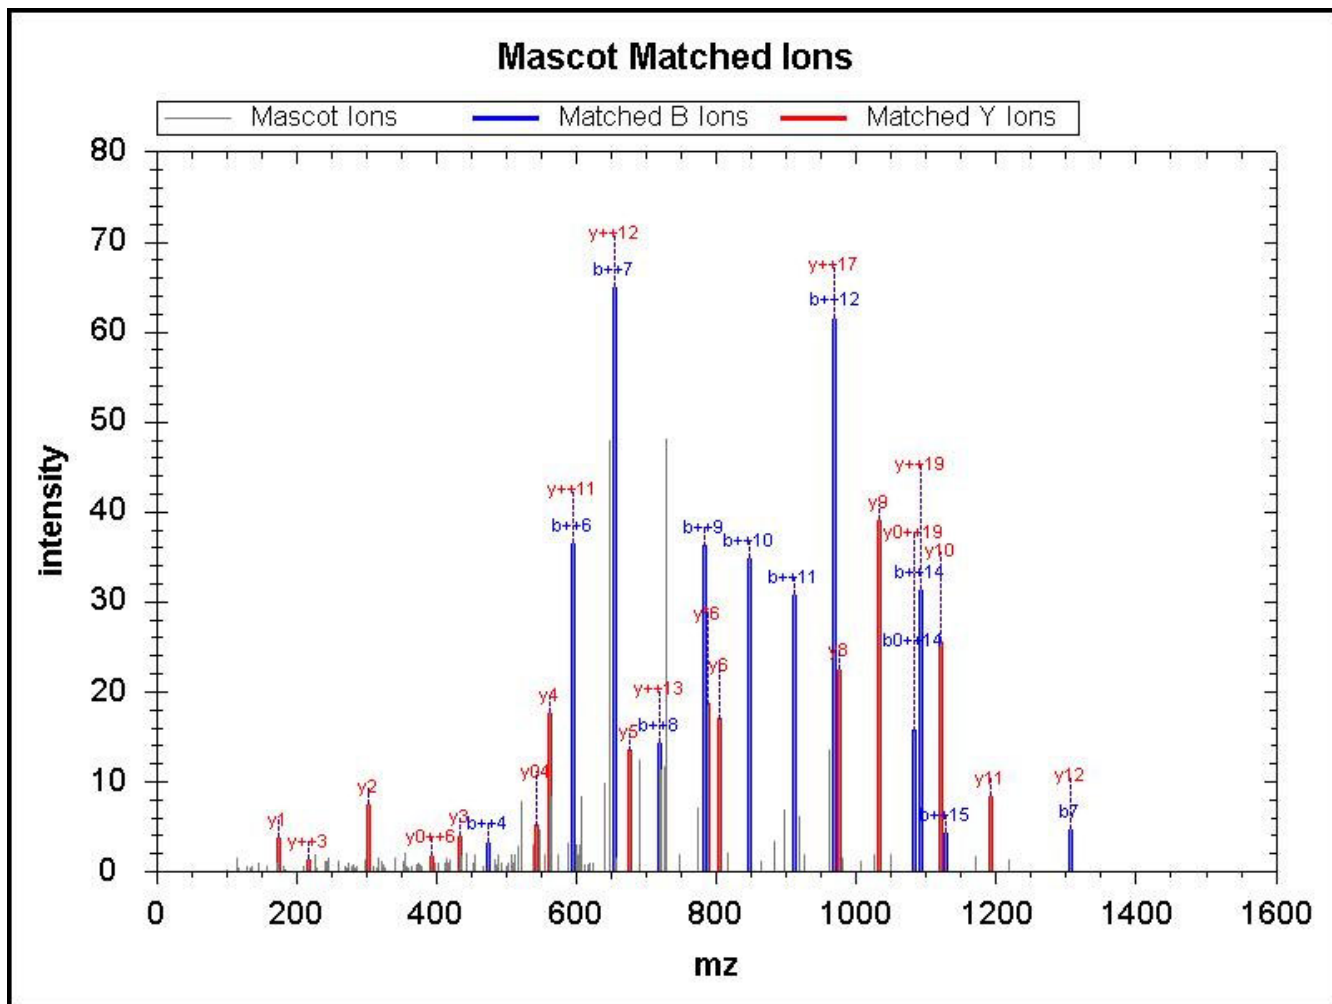



|    |          |          |          |          |          |          |   |          |        |          |        |          |        |    |
|----|----------|----------|----------|----------|----------|----------|---|----------|--------|----------|--------|----------|--------|----|
| 15 | 2,252.99 | 1,127.00 | 2,235.96 | 1,118.48 | 2,234.98 | 1,117.99 | A | 1,191.49 | 596.25 | 1,174.46 | 587.73 | 1,173.48 | 587.24 | 11 |
| 16 | 2,340.02 | 1,170.51 | 2,322.99 | 1,162.00 | 2,322.01 | 1,161.51 | S | 1,120.45 | 560.73 | 1,103.42 | 552.22 | 1,102.44 | 551.72 | 10 |
| 17 | 2,397.04 | 1,199.02 | 2,380.02 | 1,190.51 | 2,379.03 | 1,190.02 | G | 1,033.42 | 517.21 | 1,016.39 | 508.70 | 1,015.41 | 508.21 | 9  |
| 18 | 2,454.06 | 1,227.54 | 2,437.04 | 1,219.02 | 2,436.05 | 1,218.53 | G | 976.40   | 488.70 | 959.37   | 480.19 | 958.39   | 479.70 | 8  |
| 19 | 2,569.09 | 1,285.05 | 2,552.06 | 1,276.54 | 2,551.08 | 1,276.04 | D | 919.38   | 460.19 | 902.35   | 451.68 | 901.36   | 451.19 | 7  |
| 20 | 2,697.15 | 1,349.08 | 2,680.12 | 1,340.57 | 2,679.14 | 1,340.07 | Q | 804.35   | 402.68 | 787.32   | 394.16 | 786.34   | 393.67 | 6  |
| 21 | 2,812.18 | 1,406.59 | 2,795.15 | 1,398.08 | 2,794.17 | 1,397.59 | D | 676.29   | 338.65 | 659.26   | 330.14 | 658.28   | 329.64 | 5  |
| 22 | 2,940.23 | 1,470.62 | 2,923.21 | 1,462.11 | 2,922.22 | 1,461.62 | Q | 561.26   | 281.13 | 544.24   | 272.62 | 543.25   | 272.13 | 4  |
| 23 | 3,069.28 | 1,535.14 | 3,052.25 | 1,526.63 | 3,051.27 | 1,526.14 | E | 433.20   | 217.11 | 416.18   | 208.59 | 415.19   | 208.10 | 3  |
| 24 | 3,198.32 | 1,599.66 | 3,181.29 | 1,591.15 | 3,180.31 | 1,590.66 | E | 304.16   | 152.58 | 287.13   | 144.07 | 286.15   | 143.58 | 2  |
| 25 |          |          |          |          |          |          | R | 175.12   | 88.06  | 158.09   | 79.55  |          |        | 1  |

Query 60047 Hit 1

MS/MS Fragmentation of **GDAFDNFVALQDHF**K

Found in **sp|Q9NVZ3|NECAP2\_HUMAN**, Adaptin ear-binding coat-associated protein 2 OS=Homo sapiens GN=NECAP2 PE=1 SV=1

Match to Query 60047: 2011.009from(671.3436,3+)

Title: 765: Scan 1715 (rt=48.1393, f=3, i=256) [D:\lab212\membrane\Grace\Joyce\iTRAQ\_39\_1.raw]

Data File: Submitted from 20120508-1(merge) by Mascot Daemon on JOYCE-VAIO

Monoisotopic mass of neutral peptide Mr(calc): 2011.009

Variable modifications:

K15 iTRAQ4plex (K)

Ions Score: 69.76 Expect: 0.000

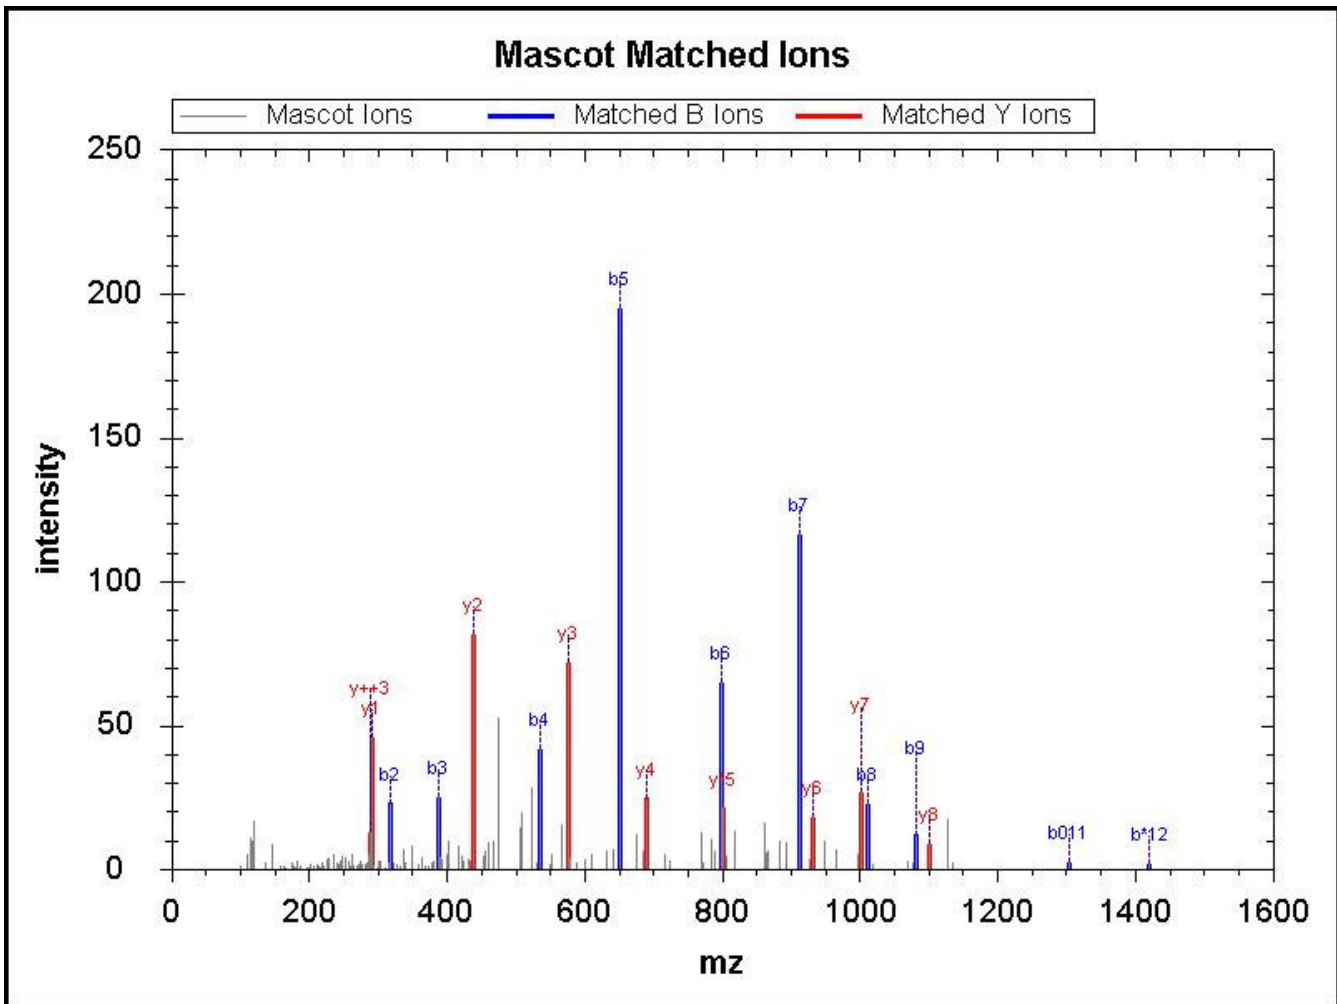

| No | b      | b++    | b* | b*++ | b0     | b0++   | Seq | y        | y++    | y*       | y*++   | y0       | y0++   | RevNo |
|----|--------|--------|----|------|--------|--------|-----|----------|--------|----------|--------|----------|--------|-------|
| 1  | 202.13 | 101.57 |    |      |        |        | G   |          |        |          |        |          |        | 15    |
| 2  | 317.16 | 159.08 |    |      | 299.15 | 150.08 | D   | 1,810.89 | 905.95 | 1,793.86 | 897.43 | 1,792.88 | 896.94 | 14    |
| 3  | 388.19 | 194.60 |    |      | 370.18 | 185.60 | A   | 1,695.86 | 848.43 | 1,678.83 | 839.92 | 1,677.85 | 839.43 | 13    |

|    |          |        |          |        |          |        |   |          |        |          |        |          |        |    |
|----|----------|--------|----------|--------|----------|--------|---|----------|--------|----------|--------|----------|--------|----|
| 4  | 535.26   | 268.14 |          |        | 517.25   | 259.13 | F | 1,624.82 | 812.92 | 1,607.80 | 804.40 | 1,606.81 | 803.91 | 12 |
| 5  | 650.29   | 325.65 |          |        | 632.28   | 316.64 | D | 1,477.76 | 739.38 | 1,460.73 | 730.87 | 1,459.74 | 730.38 | 11 |
| 6  | 797.36   | 399.18 |          |        | 779.35   | 390.18 | F | 1,362.73 | 681.87 | 1,345.70 | 673.35 | 1,344.72 | 672.86 | 10 |
| 7  | 911.40   | 456.20 | 894.37   | 447.69 | 893.39   | 447.20 | N | 1,215.66 | 608.33 | 1,198.63 | 599.82 | 1,197.65 | 599.33 | 9  |
| 8  | 1,010.47 | 505.74 | 993.44   | 497.23 | 992.46   | 496.73 | V | 1,101.62 | 551.31 | 1,084.59 | 542.80 | 1,083.61 | 542.31 | 8  |
| 9  | 1,081.51 | 541.26 | 1,064.48 | 532.74 | 1,063.50 | 532.25 | A | 1,002.55 | 501.78 | 985.52   | 493.26 | 984.54   | 492.77 | 7  |
| 10 | 1,194.59 | 597.80 | 1,177.56 | 589.29 | 1,176.58 | 588.79 | L | 931.51   | 466.26 | 914.49   | 457.75 | 913.50   | 457.25 | 6  |
| 11 | 1,322.65 | 661.83 | 1,305.62 | 653.32 | 1,304.64 | 652.82 | Q | 818.43   | 409.72 | 801.40   | 401.20 | 800.42   | 400.71 | 5  |
| 12 | 1,437.68 | 719.34 | 1,420.65 | 710.83 | 1,419.67 | 710.34 | D | 690.37   | 345.69 | 673.34   | 337.17 | 672.36   | 336.68 | 4  |
| 13 | 1,574.74 | 787.87 | 1,557.71 | 779.36 | 1,556.73 | 778.87 | H | 575.34   | 288.17 | 558.32   | 279.66 |          |        | 3  |
| 14 | 1,721.80 | 861.41 | 1,704.78 | 852.89 | 1,703.79 | 852.40 | F | 438.28   | 219.65 | 421.26   | 211.13 |          |        | 2  |
| 15 |          |        |          |        |          |        | K | 291.21   | 146.11 | 274.19   | 137.60 |          |        | 1  |

Query 85974 Hit 1

MS/MS Fragmentation of **EKYPDLANFWHELHFVEK**

Found in **sp|Q81VF7|FMNL3\_HUMAN**, Formin-like protein 3 OS=Homo sapiens GN=FMNL3 PE=1 SV=3

Match to Query 85974: 2733.436from(547.6944,5+)

Title: 1003: Sum of 2 scans in range 2075 (rt=56.4013, f=4, i=634) to 2076 (rt=56.4267, f=4, i=635)

[D:\lab212\membrane\GraceJoyce\54-2.raw]

Data File: Submitted from 20120508-1(merge) by Mascot Daemon on JOYCE-VAIO

Monoisotopic mass of neutral peptide Mr(calc): 2733.436

Variable modifications:

K2 :iTRAQ4plex (K)

K18 :iTRAQ4plex (K)

Ions Score: 69.23 Expect: 0.000

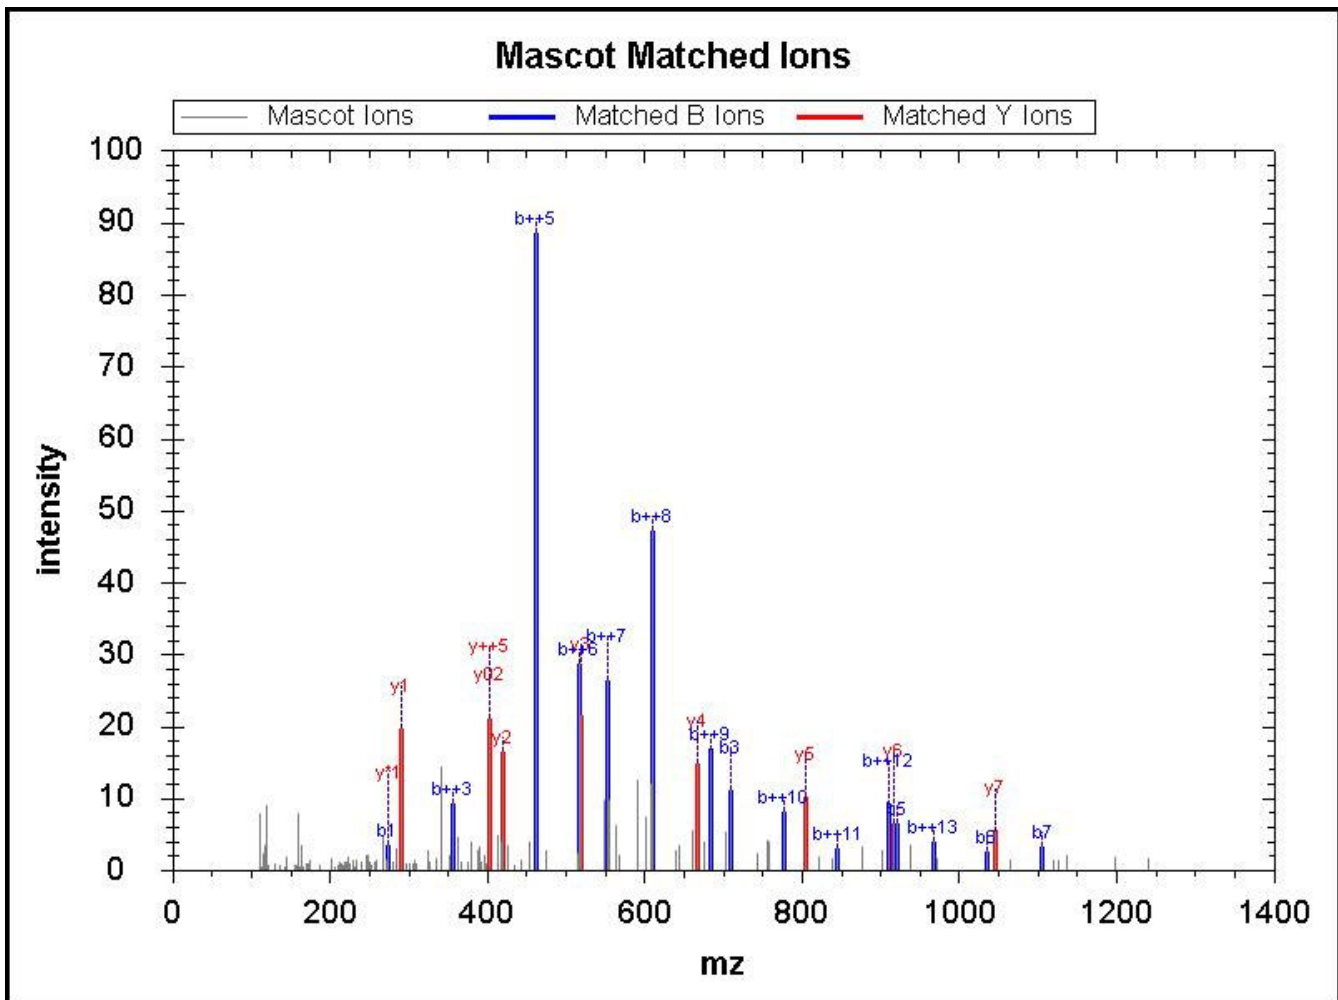

| No | b | b++ | b* | b*++ | b0 | b0++ | Seq | y | y++ | y* | y*++ | y0 | y0++ | RevNo |
|----|---|-----|----|------|----|------|-----|---|-----|----|------|----|------|-------|
|----|---|-----|----|------|----|------|-----|---|-----|----|------|----|------|-------|

|    |          |          |          |          |          |          |   |          |          |          |          |          |          |    |
|----|----------|----------|----------|----------|----------|----------|---|----------|----------|----------|----------|----------|----------|----|
| 1  | 274.15   | 137.58   |          |          | 256.14   | 128.57   | E |          |          |          |          |          |          | 18 |
| 2  | 546.35   | 273.68   | 529.32   | 265.16   | 528.34   | 264.67   | K | 2,461.29 | 1,231.15 | 2,444.26 | 1,222.64 | 2,443.28 | 1,222.14 | 17 |
| 3  | 709.41   | 355.21   | 692.39   | 346.70   | 691.40   | 346.20   | Y | 2,189.09 | 1,095.05 | 2,172.07 | 1,086.54 | 2,171.08 | 1,086.05 | 16 |
| 4  | 806.47   | 403.74   | 789.44   | 395.22   | 788.45   | 394.73   | P | 2,026.03 | 1,013.52 | 2,009.00 | 1,005.01 | 2,008.02 | 1,004.51 | 15 |
| 5  | 921.49   | 461.25   | 904.47   | 452.74   | 903.48   | 452.24   | D | 1,928.98 | 964.99   | 1,911.95 | 956.48   | 1,910.97 | 955.99   | 14 |
| 6  | 1,034.58 | 517.79   | 1,017.55 | 509.28   | 1,016.57 | 508.79   | L | 1,813.95 | 907.48   | 1,796.92 | 898.97   | 1,795.94 | 898.47   | 13 |
| 7  | 1,105.61 | 553.31   | 1,088.59 | 544.80   | 1,087.60 | 544.30   | A | 1,700.87 | 850.94   | 1,683.84 | 842.42   | 1,682.86 | 841.93   | 12 |
| 8  | 1,219.66 | 610.33   | 1,202.63 | 601.82   | 1,201.65 | 601.33   | N | 1,629.83 | 815.42   | 1,612.80 | 806.91   | 1,611.82 | 806.41   | 11 |
| 9  | 1,366.72 | 683.87   | 1,349.70 | 675.35   | 1,348.71 | 674.86   | F | 1,515.79 | 758.40   | 1,498.76 | 749.88   | 1,497.78 | 749.39   | 10 |
| 10 | 1,552.80 | 776.91   | 1,535.78 | 768.39   | 1,534.79 | 767.90   | W | 1,368.72 | 684.86   | 1,351.69 | 676.35   | 1,350.71 | 675.86   | 9  |
| 11 | 1,689.86 | 845.44   | 1,672.84 | 836.92   | 1,671.85 | 836.43   | H | 1,182.64 | 591.82   | 1,165.61 | 583.31   | 1,164.63 | 582.82   | 8  |
| 12 | 1,818.91 | 909.96   | 1,801.88 | 901.44   | 1,800.89 | 900.95   | E | 1,045.58 | 523.29   | 1,028.55 | 514.78   | 1,027.57 | 514.29   | 7  |
| 13 | 1,931.99 | 966.50   | 1,914.96 | 957.99   | 1,913.98 | 957.49   | L | 916.54   | 458.77   | 899.51   | 450.26   | 898.53   | 449.77   | 6  |
| 14 | 2,069.05 | 1,035.03 | 2,052.02 | 1,026.51 | 2,051.04 | 1,026.02 | H | 803.45   | 402.23   | 786.43   | 393.72   | 785.44   | 393.22   | 5  |
| 15 | 2,216.12 | 1,108.56 | 2,199.09 | 1,100.05 | 2,198.11 | 1,099.56 | F | 666.39   | 333.70   | 649.37   | 325.19   | 648.38   | 324.70   | 4  |
| 16 | 2,315.19 | 1,158.10 | 2,298.16 | 1,149.58 | 2,297.17 | 1,149.09 | V | 519.33   | 260.17   | 502.30   | 251.65   | 501.32   | 251.16   | 3  |
| 17 | 2,444.23 | 1,222.62 | 2,427.20 | 1,214.10 | 2,426.22 | 1,213.61 | E | 420.26   | 210.63   | 403.23   | 202.12   | 402.25   | 201.63   | 2  |
| 18 |          |          |          |          |          |          | K | 291.21   | 146.11   | 274.19   | 137.60   |          |          | 1  |

Query 51306 Hit 1

MS/MS Fragmentation of **ALLADAQIMLDHLK**

Found in **sp|Q9JMH9|MY18A\_MOUSE**, Unconventional myosin-XVIIIa OS=Mus musculus GN=Myo18a PE=1 SV=2

Match to Query 51306: 1839.053from(614.025,3+)

Title: 1039: Sum of 2 scans in range 2318 (rt=61.5113, f=4, i=681) to 2319 (rt=61.5368, f=4, i=682)

[D:\lab212\membrane\Grace\Joyce\iTRAQ\_38\_1.raw]

Data File: Submitted from 20120508-1(merge) by Mascot Daemon on JOYCE-VAIO

Monoisotopic mass of neutral peptide Mr(calc): 1839.053

Variable modifications:

K14 iTRAQ4plex (K)

Ions Score: 69.21 Expect: 0.000

### Mascot Matched Ions

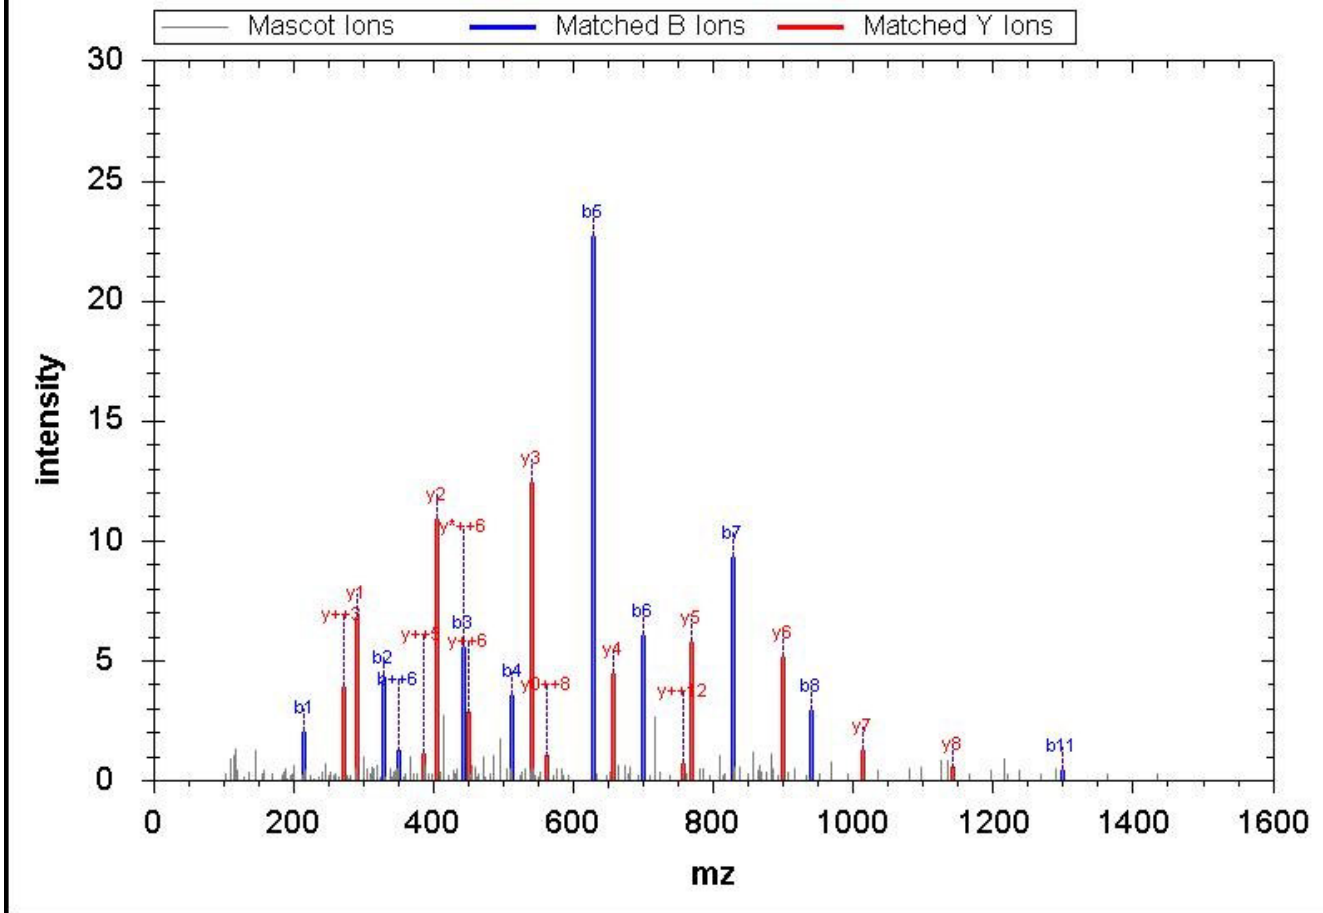

| No | b        | b++    | b*       | b*++   | b0       | b0++   | Seq | y        | y++    | y*       | y*++   | y0       | y0++   | RevNo |
|----|----------|--------|----------|--------|----------|--------|-----|----------|--------|----------|--------|----------|--------|-------|
| 1  | 216.15   | 108.58 |          |        |          |        | A   |          |        |          |        |          |        | 14    |
| 2  | 329.23   | 165.12 |          |        |          |        | L   | 1,624.92 | 812.96 | 1,607.89 | 804.45 | 1,606.91 | 803.96 | 13    |
| 3  | 442.31   | 221.66 |          |        |          |        | L   | 1,511.84 | 756.42 | 1,494.81 | 747.91 | 1,493.83 | 747.42 | 12    |
| 4  | 513.35   | 257.18 |          |        |          |        | A   | 1,398.75 | 699.88 | 1,381.73 | 691.37 | 1,380.74 | 690.87 | 11    |
| 5  | 628.38   | 314.69 |          |        | 610.37   | 305.69 | D   | 1,327.72 | 664.36 | 1,310.69 | 655.85 | 1,309.71 | 655.36 | 10    |
| 6  | 699.42   | 350.21 |          |        | 681.41   | 341.21 | A   | 1,212.69 | 606.85 | 1,195.66 | 598.33 | 1,194.68 | 597.84 | 9     |
| 7  | 827.47   | 414.24 | 810.45   | 405.73 | 809.46   | 405.24 | Q   | 1,141.65 | 571.33 | 1,124.63 | 562.82 | 1,123.64 | 562.32 | 8     |
| 8  | 940.56   | 470.78 | 923.53   | 462.27 | 922.55   | 461.78 | I   | 1,013.59 | 507.30 | 996.57   | 498.79 | 995.58   | 498.29 | 7     |
| 9  | 1,071.60 | 536.30 | 1,054.57 | 527.79 | 1,053.59 | 527.30 | M   | 900.51   | 450.76 | 883.48   | 442.24 | 882.50   | 441.75 | 6     |
| 10 | 1,184.68 | 592.85 | 1,167.66 | 584.33 | 1,166.67 | 583.84 | L   | 769.47   | 385.24 | 752.44   | 376.72 | 751.46   | 376.23 | 5     |
| 11 | 1,299.71 | 650.36 | 1,282.68 | 641.85 | 1,281.70 | 641.35 | D   | 656.38   | 328.70 | 639.36   | 320.18 | 638.37   | 319.69 | 4     |
| 12 | 1,436.77 | 718.89 | 1,419.74 | 710.37 | 1,418.76 | 709.88 | H   | 541.36   | 271.18 | 524.33   | 262.67 |          |        | 3     |
| 13 | 1,549.85 | 775.43 | 1,532.83 | 766.92 | 1,531.84 | 766.42 | L   | 404.30   | 202.65 | 387.27   | 194.14 |          |        | 2     |
| 14 |          |        |          |        |          |        | K   | 291.21   | 146.11 | 274.19   | 137.60 |          |        | 1     |

Query 22641 Hit 1

MS/MS Fragmentation of **VVGALLHALK**

Found in **sp|P49222|EPB42\_MOUSE**, Erythrocyte membrane protein band 4.2 OS=Mus musculus GN=Epb42 PE=2 SV=3

Match to Query 22641: 1307.858from(654.9363,2+)

Title: 788: Sum of 2 scans in range 1770 (rt=49.4419, f=4, i=532) to 1771 (rt=49.4674, f=4, i=533)

[D:\lab212\membrane\Grace\Joyce\iTRAQ\_42\_1.raw]

Data File: Submitted from 20120508-1(merge) by Mascot Daemon on JOYCE-VAIO

Monoisotopic mass of neutral peptide Mr(calc): 1307.858

Variable modifications:

K10 iTRAQ4plex (K)

Ions Score: 69.14 Expect: 0.000

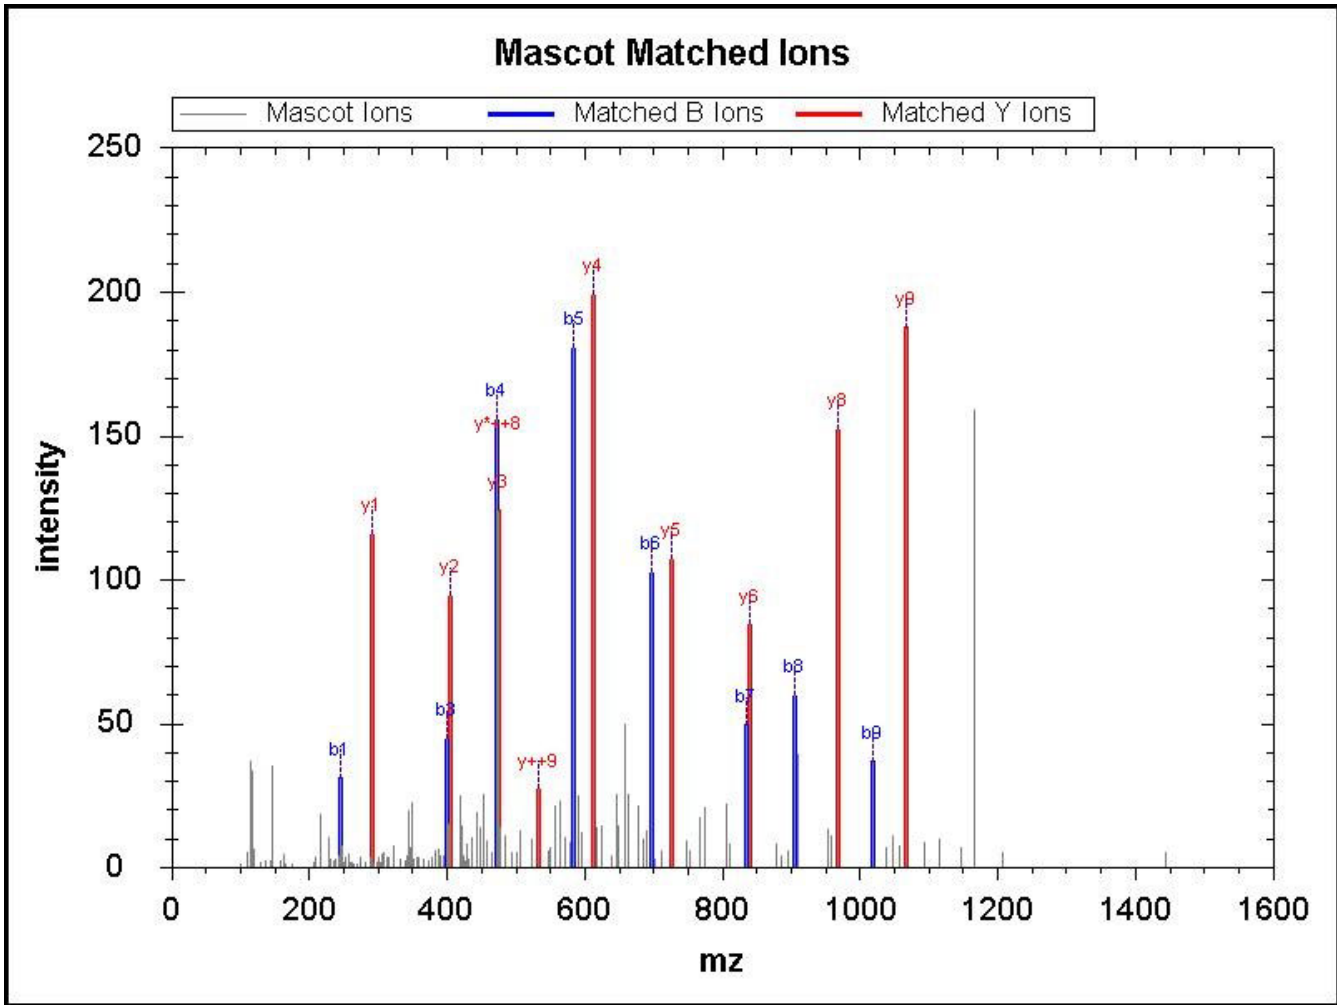

| No | b        | b++    | Seq | y        | y++    | y*       | y*++   | RevNo |
|----|----------|--------|-----|----------|--------|----------|--------|-------|
| 1  | 244.18   | 122.59 | V   |          |        |          |        | 10    |
| 2  | 343.25   | 172.13 | V   | 1,065.69 | 533.35 | 1,048.66 | 524.84 | 9     |
| 3  | 400.27   | 200.64 | G   | 966.62   | 483.81 | 949.60   | 475.30 | 8     |
| 4  | 471.30   | 236.16 | A   | 909.60   | 455.30 | 892.57   | 446.79 | 7     |
| 5  | 584.39   | 292.70 | L   | 838.56   | 419.79 | 821.54   | 411.27 | 6     |
| 6  | 697.47   | 349.24 | L   | 725.48   | 363.24 | 708.45   | 354.73 | 5     |
| 7  | 834.53   | 417.77 | H   | 612.39   | 306.70 | 595.37   | 298.19 | 4     |
| 8  | 905.57   | 453.29 | A   | 475.34   | 238.17 | 458.31   | 229.66 | 3     |
| 9  | 1,018.65 | 509.83 | L   | 404.30   | 202.65 | 387.27   | 194.14 | 2     |
| 10 |          |        | K   | 291.21   | 146.11 | 274.19   | 137.60 | 1     |

Query 96552 Hit 1

MS/MS Fragmentation of **FSLQGELLAPDVDLPTHLGLHHHGEEAER**

Found in **sp|Q9BWH6|RPAP1\_HUMAN**, RNA polymerase II-associated protein 1 OS=Homo sapiens GN=RPAP1 PE=1 SV=3

Match to Query 96552: 3360.709from(673.1491,5+)

Title: 846: Scan 1777 (rt=49.6535, f=3, i=277) [D:\lab212\membrane\Grace\Joyce\54-1.raw]

Data File: Submitted from 20120508-1(merge) by Mascot Daemon on JOYCE-VAIO

Monoisotopic mass of neutral peptide Mr(calc): 3360.709

Variable modifications:

Ions Score: 68.98 Expect: 0.000

### Mascot Matched Ions

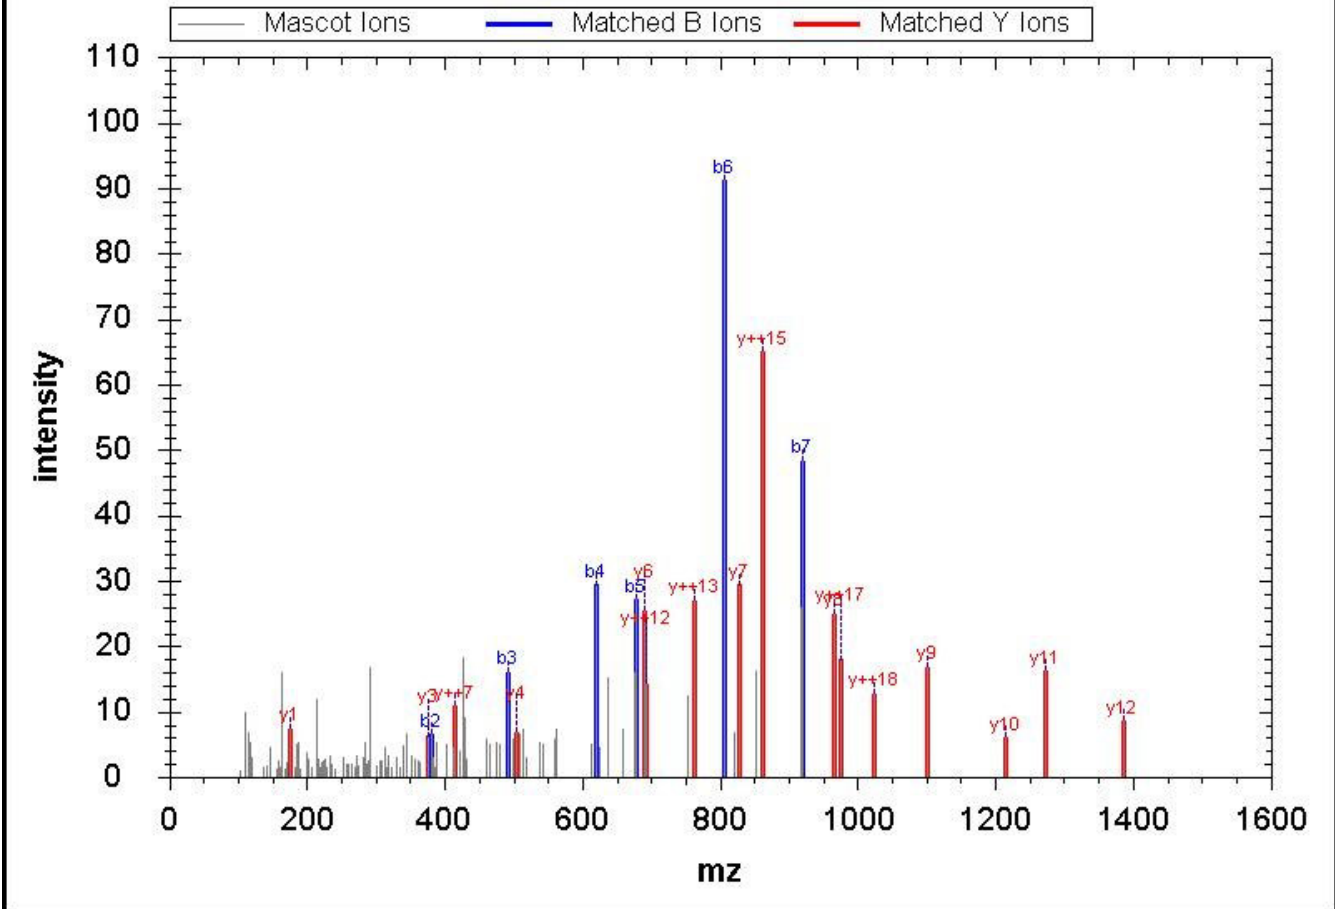

| No | b        | b++      | b*       | b*++     | b0       | b0++     | Seq | y        | y++      | y*       | y*++     | y0       | y0++     | RevNo |
|----|----------|----------|----------|----------|----------|----------|-----|----------|----------|----------|----------|----------|----------|-------|
| 1  | 292.18   | 146.59   |          |          |          |          | F   |          |          |          |          |          |          | 29    |
| 2  | 379.21   | 190.11   |          |          | 361.20   | 181.10   | S   | 3,070.53 | 1,535.77 | 3,053.51 | 1,527.26 | 3,052.52 | 1,526.77 | 28    |
| 3  | 492.29   | 246.65   |          |          | 474.28   | 237.65   | L   | 2,983.50 | 1,492.25 | 2,966.48 | 1,483.74 | 2,965.49 | 1,483.25 | 27    |
| 4  | 620.35   | 310.68   | 603.33   | 302.17   | 602.34   | 301.67   | Q   | 2,870.42 | 1,435.71 | 2,853.39 | 1,427.20 | 2,852.41 | 1,426.71 | 26    |
| 5  | 677.37   | 339.19   | 660.35   | 330.68   | 659.36   | 330.19   | G   | 2,742.36 | 1,371.68 | 2,725.33 | 1,363.17 | 2,724.35 | 1,362.68 | 25    |
| 6  | 806.42   | 403.71   | 789.39   | 395.20   | 788.41   | 394.71   | E   | 2,685.34 | 1,343.17 | 2,668.31 | 1,334.66 | 2,667.33 | 1,334.17 | 24    |
| 7  | 919.50   | 460.25   | 902.47   | 451.74   | 901.49   | 451.25   | L   | 2,556.30 | 1,278.65 | 2,539.27 | 1,270.14 | 2,538.28 | 1,269.65 | 23    |
| 8  | 1,032.58 | 516.80   | 1,015.56 | 508.28   | 1,014.57 | 507.79   | L   | 2,443.21 | 1,222.11 | 2,426.18 | 1,213.60 | 2,425.20 | 1,213.10 | 22    |
| 9  | 1,103.62 | 552.31   | 1,086.60 | 543.80   | 1,085.61 | 543.31   | A   | 2,330.13 | 1,165.57 | 2,313.10 | 1,157.05 | 2,312.12 | 1,156.56 | 21    |
| 10 | 1,200.67 | 600.84   | 1,183.65 | 592.33   | 1,182.66 | 591.84   | P   | 2,259.09 | 1,130.05 | 2,242.06 | 1,121.54 | 2,241.08 | 1,121.04 | 20    |
| 11 | 1,315.70 | 658.35   | 1,298.68 | 649.84   | 1,297.69 | 649.35   | D   | 2,162.04 | 1,081.52 | 2,145.01 | 1,073.01 | 2,144.03 | 1,072.52 | 19    |
| 12 | 1,414.77 | 707.89   | 1,397.74 | 699.38   | 1,396.76 | 698.88   | V   | 2,047.01 | 1,024.01 | 2,029.98 | 1,015.50 | 2,029.00 | 1,015.00 | 18    |
| 13 | 1,529.80 | 765.40   | 1,512.77 | 756.89   | 1,511.79 | 756.40   | D   | 1,947.94 | 974.47   | 1,930.92 | 965.96   | 1,929.93 | 965.47   | 17    |
| 14 | 1,642.88 | 821.94   | 1,625.85 | 813.43   | 1,624.87 | 812.94   | L   | 1,832.92 | 916.96   | 1,815.89 | 908.45   | 1,814.90 | 907.96   | 16    |
| 15 | 1,739.93 | 870.47   | 1,722.91 | 861.96   | 1,721.92 | 861.47   | P   | 1,719.83 | 860.42   | 1,702.80 | 851.91   | 1,701.82 | 851.41   | 15    |
| 16 | 1,840.98 | 920.99   | 1,823.95 | 912.48   | 1,822.97 | 911.99   | T   | 1,622.78 | 811.89   | 1,605.75 | 803.38   | 1,604.77 | 802.89   | 14    |
| 17 | 1,978.04 | 989.52   | 1,961.01 | 981.01   | 1,960.03 | 980.52   | H   | 1,521.73 | 761.37   | 1,504.70 | 752.86   | 1,503.72 | 752.36   | 13    |
| 18 | 2,091.12 | 1,046.07 | 2,074.10 | 1,037.55 | 2,073.11 | 1,037.06 | L   | 1,384.67 | 692.84   | 1,367.65 | 684.33   | 1,366.66 | 683.83   | 12    |
| 19 | 2,148.15 | 1,074.58 | 2,131.12 | 1,066.06 | 2,130.14 | 1,065.57 | G   | 1,271.59 | 636.30   | 1,254.56 | 627.78   | 1,253.58 | 627.29   | 11    |
| 20 | 2,261.23 | 1,131.12 | 2,244.20 | 1,122.61 | 2,243.22 | 1,122.11 | L   | 1,214.57 | 607.79   | 1,197.54 | 599.27   | 1,196.56 | 598.78   | 10    |
| 21 | 2,398.29 | 1,199.65 | 2,381.26 | 1,191.13 | 2,380.28 | 1,190.64 | H   | 1,101.48 | 551.24   | 1,084.46 | 542.73   | 1,083.47 | 542.24   | 9     |
| 22 | 2,535.35 | 1,268.18 | 2,518.32 | 1,259.66 | 2,517.34 | 1,259.17 | H   | 964.42   | 482.72   | 947.40   | 474.20   | 946.41   | 473.71   | 8     |
| 23 | 2,672.41 | 1,336.71 | 2,655.38 | 1,328.19 | 2,654.40 | 1,327.70 | H   | 827.36   | 414.19   | 810.34   | 405.67   | 809.35   | 405.18   | 7     |

|    |          |          |          |          |          |          |   |        |        |        |        |        |        |   |
|----|----------|----------|----------|----------|----------|----------|---|--------|--------|--------|--------|--------|--------|---|
| 24 | 2,729.43 | 1,365.22 | 2,712.40 | 1,356.70 | 2,711.42 | 1,356.21 | G | 690.31 | 345.66 | 673.28 | 337.14 | 672.29 | 336.65 | 6 |
| 25 | 2,858.47 | 1,429.74 | 2,841.44 | 1,421.23 | 2,840.46 | 1,420.73 | E | 633.28 | 317.15 | 616.26 | 308.63 | 615.27 | 308.14 | 5 |
| 26 | 2,987.51 | 1,494.26 | 2,970.49 | 1,485.75 | 2,969.50 | 1,485.25 | E | 504.24 | 252.62 | 487.21 | 244.11 | 486.23 | 243.62 | 4 |
| 27 | 3,058.55 | 1,529.78 | 3,041.52 | 1,521.27 | 3,040.54 | 1,520.77 | A | 375.20 | 188.10 | 358.17 | 179.59 | 357.19 | 179.10 | 3 |
| 28 | 3,187.59 | 1,594.30 | 3,170.57 | 1,585.79 | 3,169.58 | 1,585.29 | E | 304.16 | 152.58 | 287.13 | 144.07 | 286.15 | 143.58 | 2 |
| 29 |          |          |          |          |          |          | R | 175.12 | 88.06  | 158.09 | 79.55  |        |        | 1 |

Query 86056 Hit 1

MS/MS Fragmentation of **EPGLFDVVIINDSLDQAYAE LK**

Found in **sp|Q16774|KGUA\_HUMAN**, Guanylate kinase OS=Homo sapiens GN=GUK1 PE=1 SV=2

Match to Query 86056: 2736.452from(913.158,3+)

Title: 1221: Sum of 2 scans in range 2792 (rt=71.7096, f=4, i=803) to 2793 (rt=71.735, f=4, i=804)

[D:\lab212\membrane\Grace\Joyce\iTRAQ\_24\_1.raw]

Data File: Submitted from 20120508-1(merge) by Mascot Daemon on JOYCE-VAIO

Monoisotopic mass of neutral peptide Mr(calc): 2736.452

Variable modifications:

K22 iTRAQ4plex (K)

Ions Score: 68.95 Expect: 0.000

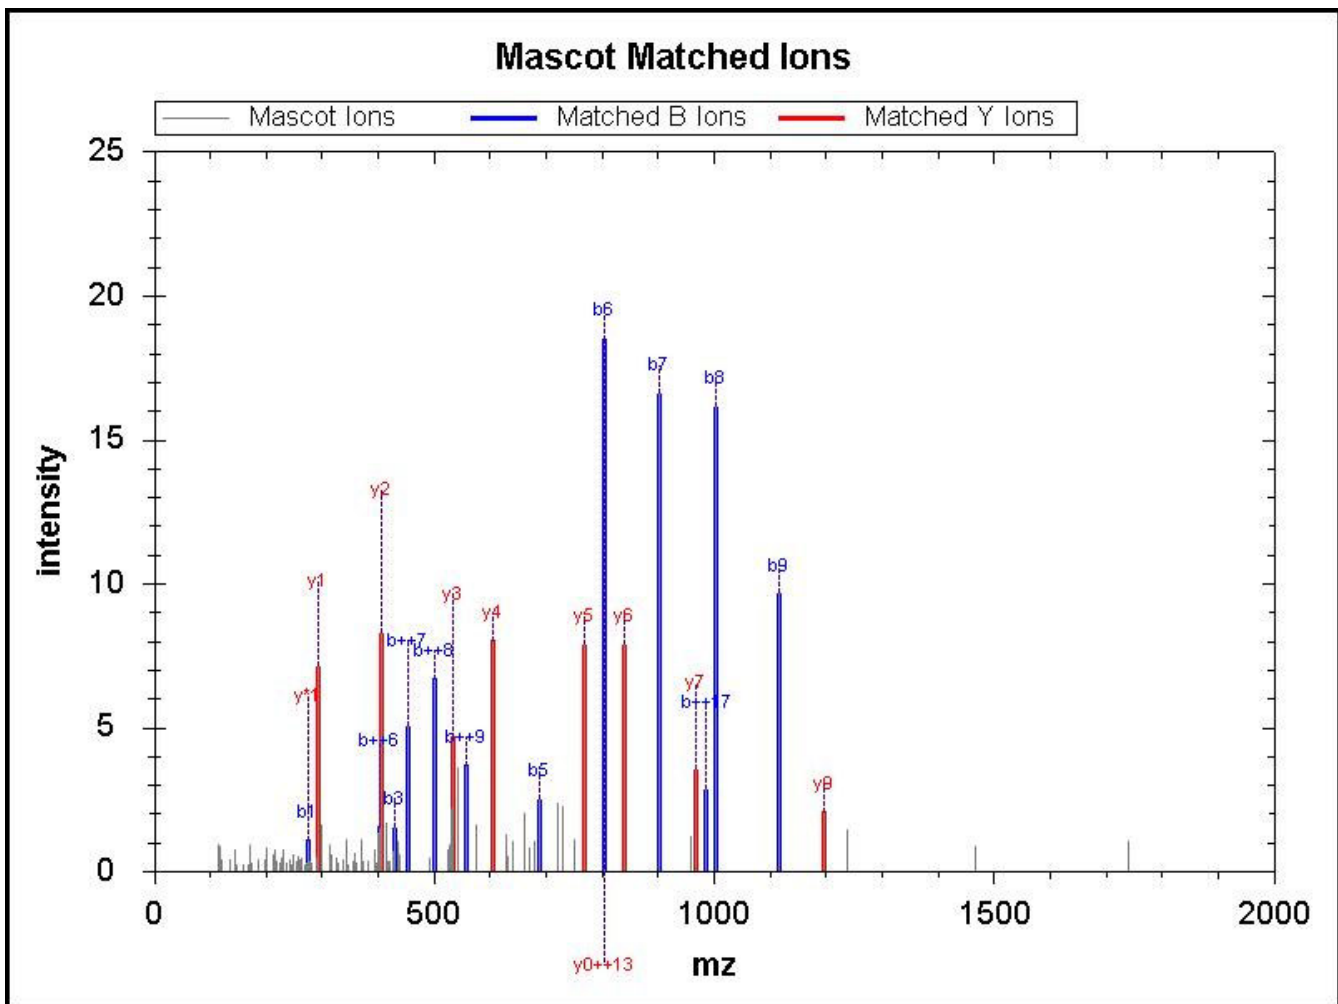

| No | b      | b++    | b* | b*** | b0     | b0++   | Seq | y        | y++      | y*       | y***     | y0       | y0++     | RevNo |
|----|--------|--------|----|------|--------|--------|-----|----------|----------|----------|----------|----------|----------|-------|
| 1  | 274.15 | 137.58 |    |      | 256.14 | 128.57 | E   |          |          |          |          |          |          | 22    |
| 2  | 371.20 | 186.11 |    |      | 353.19 | 177.10 | P   | 2,464.31 | 1,232.66 | 2,447.28 | 1,224.14 | 2,446.30 | 1,223.65 | 21    |
| 3  | 428.23 | 214.62 |    |      | 410.22 | 205.61 | G   | 2,367.26 | 1,184.13 | 2,350.23 | 1,175.62 | 2,349.25 | 1,175.13 | 20    |
| 4  | 541.31 | 271.16 |    |      | 523.30 | 262.15 | L   | 2,310.23 | 1,155.62 | 2,293.21 | 1,147.11 | 2,292.22 | 1,146.62 | 19    |
| 5  | 688.38 | 344.69 |    |      | 670.37 | 335.69 | F   | 2,197.15 | 1,099.08 | 2,180.12 | 1,090.57 | 2,179.14 | 1,090.07 | 18    |
| 6  | 803.41 | 402.21 |    |      | 785.39 | 393.20 | D   | 2,050.08 | 1,025.54 | 2,033.06 | 1,017.03 | 2,032.07 | 1,016.54 | 17    |
| 7  | 902.47 | 451.74 |    |      | 884.46 | 442.74 | V   | 1,935.06 | 968.03   | 1,918.03 | 959.52   | 1,917.04 | 959.03   | 16    |

|    |          |          |          |          |          |          |   |          |        |          |        |          |        |    |
|----|----------|----------|----------|----------|----------|----------|---|----------|--------|----------|--------|----------|--------|----|
| 8  | 1,001.54 | 501.27   |          |          | 983.53   | 492.27   | V | 1,835.99 | 918.50 | 1,818.96 | 909.98 | 1,817.98 | 909.49 | 15 |
| 9  | 1,114.63 | 557.82   |          |          | 1,096.62 | 548.81   | I | 1,736.92 | 868.96 | 1,719.89 | 860.45 | 1,718.91 | 859.96 | 14 |
| 10 | 1,227.71 | 614.36   |          |          | 1,209.70 | 605.35   | I | 1,623.83 | 812.42 | 1,606.81 | 803.91 | 1,605.82 | 803.42 | 13 |
| 11 | 1,341.75 | 671.38   | 1,324.73 | 662.87   | 1,323.74 | 662.38   | N | 1,510.75 | 755.88 | 1,493.72 | 747.37 | 1,492.74 | 746.87 | 12 |
| 12 | 1,456.78 | 728.89   | 1,439.75 | 720.38   | 1,438.77 | 719.89   | D | 1,396.71 | 698.86 | 1,379.68 | 690.34 | 1,378.70 | 689.85 | 11 |
| 13 | 1,543.81 | 772.41   | 1,526.79 | 763.90   | 1,525.80 | 763.40   | S | 1,281.68 | 641.34 | 1,264.65 | 632.83 | 1,263.67 | 632.34 | 10 |
| 14 | 1,656.90 | 828.95   | 1,639.87 | 820.44   | 1,638.89 | 819.95   | L | 1,194.65 | 597.83 | 1,177.62 | 589.31 | 1,176.64 | 588.82 | 9  |
| 15 | 1,771.92 | 886.47   | 1,754.90 | 877.95   | 1,753.91 | 877.46   | D | 1,081.56 | 541.29 | 1,064.54 | 532.77 | 1,063.55 | 532.28 | 8  |
| 16 | 1,899.98 | 950.49   | 1,882.96 | 941.98   | 1,881.97 | 941.49   | Q | 966.54   | 483.77 | 949.51   | 475.26 | 948.53   | 474.77 | 7  |
| 17 | 1,971.02 | 986.01   | 1,953.99 | 977.50   | 1,953.01 | 977.01   | A | 838.48   | 419.74 | 821.45   | 411.23 | 820.47   | 410.74 | 6  |
| 18 | 2,134.08 | 1,067.54 | 2,117.06 | 1,059.03 | 2,116.07 | 1,058.54 | Y | 767.44   | 384.22 | 750.42   | 375.71 | 749.43   | 375.22 | 5  |
| 19 | 2,205.12 | 1,103.06 | 2,188.09 | 1,094.55 | 2,187.11 | 1,094.06 | A | 604.38   | 302.69 | 587.35   | 294.18 | 586.37   | 293.69 | 4  |
| 20 | 2,334.16 | 1,167.58 | 2,317.14 | 1,159.07 | 2,316.15 | 1,158.58 | E | 533.34   | 267.17 | 516.31   | 258.66 | 515.33   | 258.17 | 3  |
| 21 | 2,447.25 | 1,224.13 | 2,430.22 | 1,215.61 | 2,429.24 | 1,215.12 | L | 404.30   | 202.65 | 387.27   | 194.14 |          |        | 2  |
| 22 |          |          |          |          |          |          | K | 291.21   | 146.11 | 274.19   | 137.60 |          |        | 1  |

Query 36868 Hit 1

MS/MS Fragmentation of **AQAELVGTADEATR**

Found in [sp|P30049|ATPD\\_HUMAN](#), ATP synthase subunit delta

Match to Query 36868: 1574.799from(788.4069,2+)

Title: 160: Scan 923 (rt=27.846, f=2, i=94) [D:\lab212\membrane\GraceJoyce\iTRAQ\_22\_2.raw]

Data File: Submitted from 20120508-1(merge) by Mascot Daemon on JOYCE-VAIO

Monoisotopic mass of neutral peptide Mr(calc): 1574.799

Variable modifications:

Ions Score: 68.9 Expect: 0.000

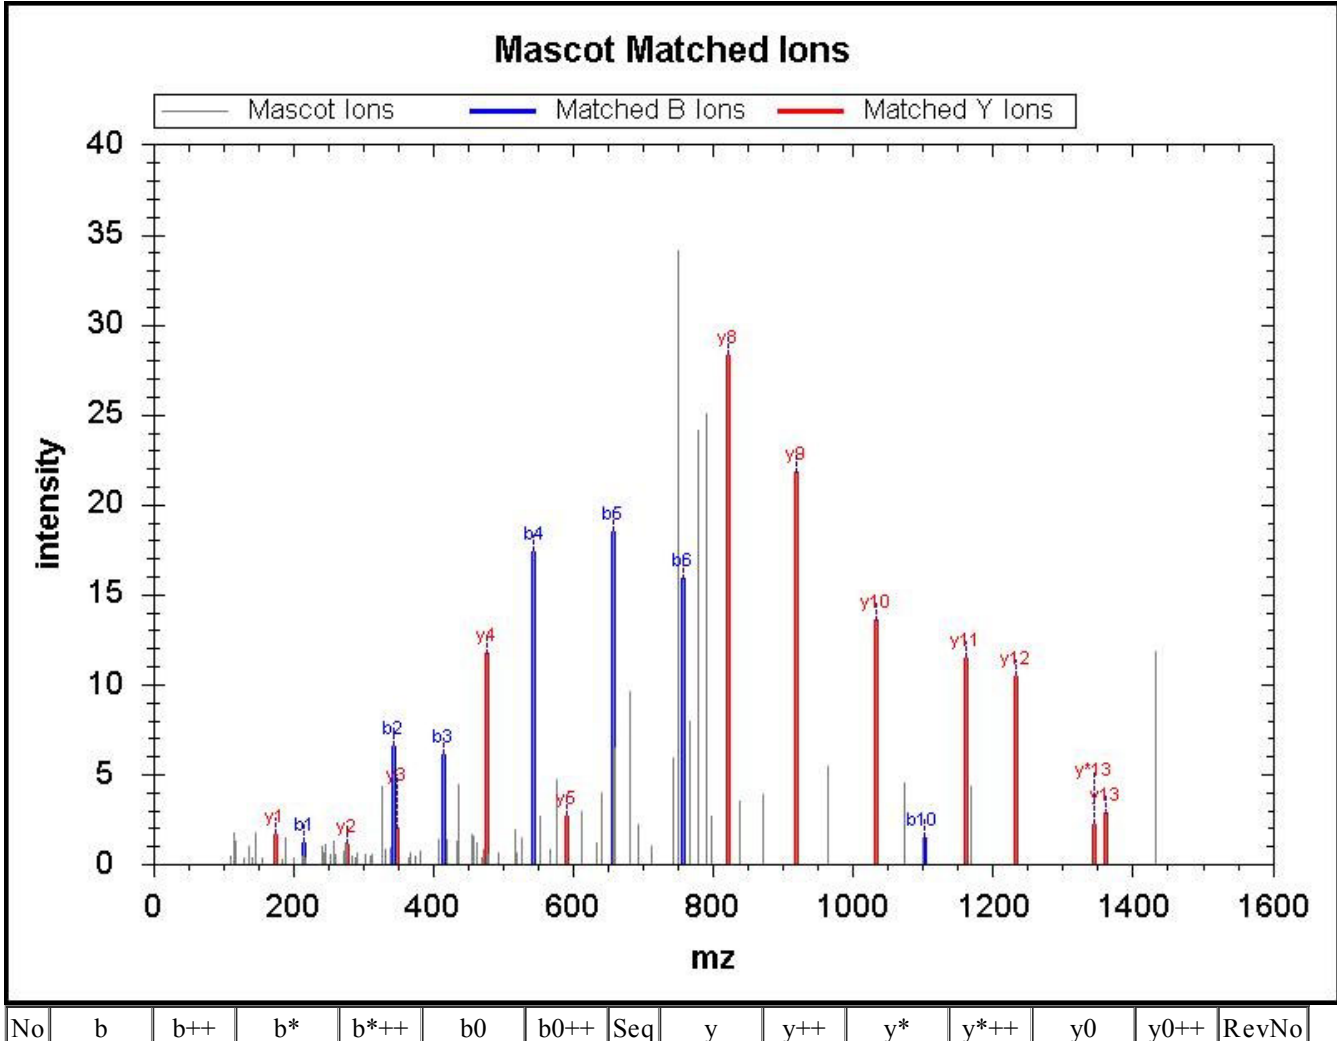



|    |          |        |          |        |          |        |   |          |        |          |        |          |        |    |
|----|----------|--------|----------|--------|----------|--------|---|----------|--------|----------|--------|----------|--------|----|
| 1  | 216.15   | 108.58 |          |        |          |        | A |          |        |          |        |          | 14     |    |
| 2  | 344.21   | 172.61 | 327.18   | 164.09 |          |        | Q | 1,360.67 | 680.84 | 1,343.64 | 672.33 | 1,342.66 | 671.83 | 13 |
| 3  | 415.24   | 208.12 | 398.22   | 199.61 |          |        | A | 1,232.61 | 616.81 | 1,215.59 | 608.30 | 1,214.60 | 607.80 | 12 |
| 4  | 544.28   | 272.65 | 527.26   | 264.13 | 526.27   | 263.64 | E | 1,161.57 | 581.29 | 1,144.55 | 572.78 | 1,143.56 | 572.29 | 11 |
| 5  | 657.37   | 329.19 | 640.34   | 320.67 | 639.36   | 320.18 | L | 1,032.53 | 516.77 | 1,015.51 | 508.26 | 1,014.52 | 507.76 | 10 |
| 6  | 756.44   | 378.72 | 739.41   | 370.21 | 738.43   | 369.72 | V | 919.45   | 460.23 | 902.42   | 451.71 | 901.44   | 451.22 | 9  |
| 7  | 813.46   | 407.23 | 796.43   | 398.72 | 795.45   | 398.23 | G | 820.38   | 410.69 | 803.35   | 402.18 | 802.37   | 401.69 | 8  |
| 8  | 914.51   | 457.76 | 897.48   | 449.24 | 896.50   | 448.75 | T | 763.36   | 382.18 | 746.33   | 373.67 | 745.35   | 373.18 | 7  |
| 9  | 985.54   | 493.28 | 968.52   | 484.76 | 967.53   | 484.27 | A | 662.31   | 331.66 | 645.28   | 323.15 | 644.30   | 322.65 | 6  |
| 10 | 1,100.57 | 550.79 | 1,083.54 | 542.28 | 1,082.56 | 541.78 | D | 591.27   | 296.14 | 574.25   | 287.63 | 573.26   | 287.13 | 5  |
| 11 | 1,229.61 | 615.31 | 1,212.59 | 606.80 | 1,211.60 | 606.30 | E | 476.25   | 238.63 | 459.22   | 230.11 | 458.24   | 229.62 | 4  |
| 12 | 1,300.65 | 650.83 | 1,283.62 | 642.32 | 1,282.64 | 641.82 | A | 347.20   | 174.11 | 330.18   | 165.59 | 329.19   | 165.10 | 3  |
| 13 | 1,401.70 | 701.35 | 1,384.67 | 692.84 | 1,383.69 | 692.35 | T | 276.17   | 138.59 | 259.14   | 130.07 | 258.16   | 129.58 | 2  |
| 14 |          |        |          |        |          |        | R | 175.12   | 88.06  | 158.09   | 79.55  |          |        | 1  |

Query 78294 Hit 1

MS/MS Fragmentation of **GLQVLLTPVLANILEADQEK**

Found in **sp|Q9UHD2|TBK1\_HUMAN**, Serine/threonine-protein kinase TBK1 OS=Homo sapiens GN=TBK1 PE=1 SV=1

Match to Query 78294: 2451.419from(818.147,3+)

Title: 1077: Sum of 2 scans in range 2982 (rt=73.4282, f=4, i=705) to 2983 (rt=73.4536, f=4, i=706)

[D:\lab212\membrane\GraceJoyce\iTRAQ\_24\_2.raw]

Data File:Submitted from 20120508-1(merge) by Mascot Daemon on JOYCE-VAIO

Monoisotopic mass of neutral peptide Mr(calc): 2451.419

Variable modifications:

K20 iTRAQ4plex (K)

Ions Score: 68.83 Expect: 0.000

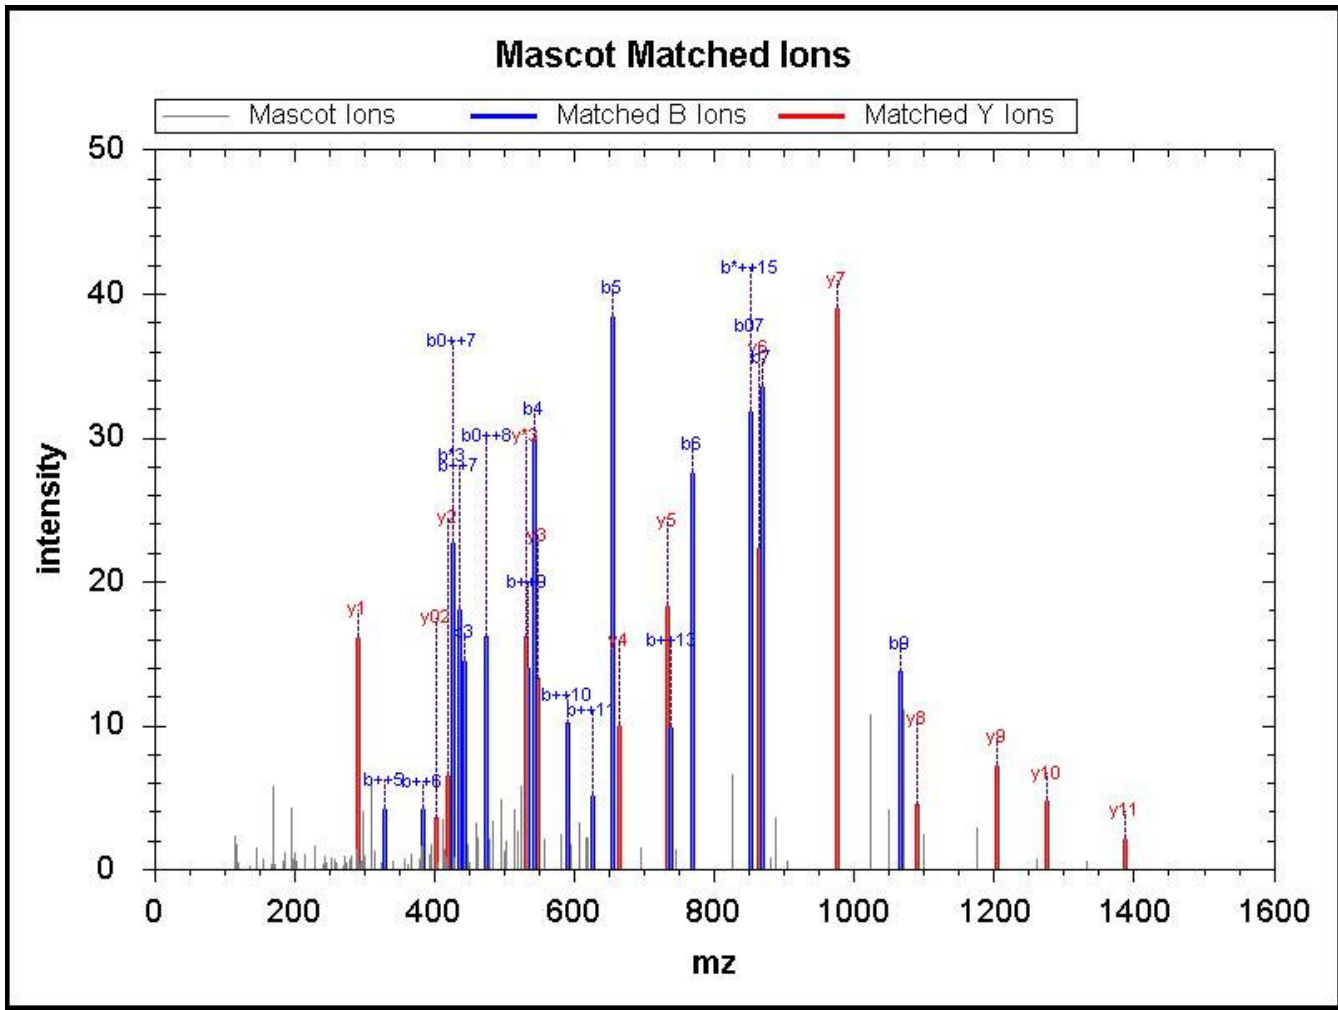

| No | b        | b++      | b*       | b*++     | b0       | b0++     | Seq | y        | y++      | y*       | y*++     | y0       | y0++     | RevNo |
|----|----------|----------|----------|----------|----------|----------|-----|----------|----------|----------|----------|----------|----------|-------|
| 1  | 202.13   | 101.57   |          |          |          |          | G   |          |          |          |          |          |          | 20    |
| 2  | 315.21   | 158.11   |          |          |          |          | L   | 2,251.30 | 1,126.16 | 2,234.28 | 1,117.64 | 2,233.29 | 1,117.15 | 19    |
| 3  | 443.27   | 222.14   | 426.25   | 213.63   |          |          | Q   | 2,138.22 | 1,069.61 | 2,121.19 | 1,061.10 | 2,120.21 | 1,060.61 | 18    |
| 4  | 542.34   | 271.67   | 525.32   | 263.16   |          |          | V   | 2,010.16 | 1,005.58 | 1,993.13 | 997.07   | 1,992.15 | 996.58   | 17    |
| 5  | 655.43   | 328.22   | 638.40   | 319.70   |          |          | L   | 1,911.09 | 956.05   | 1,894.07 | 947.54   | 1,893.08 | 947.04   | 16    |
| 6  | 768.51   | 384.76   | 751.48   | 376.25   |          |          | L   | 1,798.01 | 899.51   | 1,780.98 | 890.99   | 1,780.00 | 890.50   | 15    |
| 7  | 869.56   | 435.28   | 852.53   | 426.77   | 851.55   | 426.28   | T   | 1,684.92 | 842.97   | 1,667.90 | 834.45   | 1,666.91 | 833.96   | 14    |
| 8  | 966.61   | 483.81   | 949.58   | 475.30   | 948.60   | 474.80   | P   | 1,583.88 | 792.44   | 1,566.85 | 783.93   | 1,565.87 | 783.44   | 13    |
| 9  | 1,065.68 | 533.34   | 1,048.65 | 524.83   | 1,047.67 | 524.34   | V   | 1,486.82 | 743.92   | 1,469.80 | 735.40   | 1,468.81 | 734.91   | 12    |
| 10 | 1,178.76 | 589.89   | 1,161.74 | 581.37   | 1,160.75 | 580.88   | L   | 1,387.76 | 694.38   | 1,370.73 | 685.87   | 1,369.74 | 685.38   | 11    |
| 11 | 1,249.80 | 625.40   | 1,232.77 | 616.89   | 1,231.79 | 616.40   | A   | 1,274.67 | 637.84   | 1,257.64 | 629.33   | 1,256.66 | 628.83   | 10    |
| 12 | 1,363.84 | 682.43   | 1,346.82 | 673.91   | 1,345.83 | 673.42   | N   | 1,203.63 | 602.32   | 1,186.61 | 593.81   | 1,185.62 | 593.32   | 9     |
| 13 | 1,476.93 | 738.97   | 1,459.90 | 730.45   | 1,458.92 | 729.96   | I   | 1,089.59 | 545.30   | 1,072.56 | 536.79   | 1,071.58 | 536.29   | 8     |
| 14 | 1,590.01 | 795.51   | 1,572.98 | 787.00   | 1,572.00 | 786.50   | L   | 976.51   | 488.76   | 959.48   | 480.24   | 958.50   | 479.75   | 7     |
| 15 | 1,719.05 | 860.03   | 1,702.03 | 851.52   | 1,701.04 | 851.03   | E   | 863.42   | 432.21   | 846.40   | 423.70   | 845.41   | 423.21   | 6     |
| 16 | 1,790.09 | 895.55   | 1,773.06 | 887.04   | 1,772.08 | 886.54   | A   | 734.38   | 367.69   | 717.35   | 359.18   | 716.37   | 358.69   | 5     |
| 17 | 1,905.12 | 953.06   | 1,888.09 | 944.55   | 1,887.11 | 944.06   | D   | 663.34   | 332.18   | 646.32   | 323.66   | 645.33   | 323.17   | 4     |
| 18 | 2,033.18 | 1,017.09 | 2,016.15 | 1,008.58 | 2,015.17 | 1,008.09 | Q   | 548.32   | 274.66   | 531.29   | 266.15   | 530.31   | 265.66   | 3     |
| 19 | 2,162.22 | 1,081.61 | 2,145.19 | 1,073.10 | 2,144.21 | 1,072.61 | E   | 420.26   | 210.63   | 403.23   | 202.12   | 402.25   | 201.63   | 2     |
| 20 |          |          |          |          |          |          | K   | 291.21   | 146.11   | 274.19   | 137.60   |          |          | 1     |

Query 80791 Hit 1

MS/MS Fragmentation of **YKGESVQGALILAELLSAVK**

Found in **sp|Q8NBN3|TM87A\_HUMAN**, Transmembrane protein 87A OS=Homo sapiens GN=TMEM87A PE=1 SV=3

Match to Query 80791: 2520.493from(841.1717,3+)

Title: 1201: Scan 2600 (rt=68.124, f=2, i=428) [D:\lab212\membrane\Grace\Joyce\iTRAQ\_41\_1.raw]

Data File: Submitted from 20120508-1(merge) by Mascot Daemon on JOYCE-VAIO

Monoisotopic mass of neutral peptide Mr(calc): 2520.493

Variable modifications:

K2 :iTRAQ4plex (K)

K20 :iTRAQ4plex (K)

Ions Score: 68.71 Expect: 0.000



Match to Query 93886: 3159.674from(790.9257,4+)

Title: 1068: Sum of 3 scans in range 2404 (rt=63.6177, f=2, i=376) to 2414 (rt=63.8493, f=4, i=739)

[D:\lab212\membrane\GraceJoyce\47\_1.raw]

Data File:Submitted from 20120508-1(merge) by Mascot Daemon on JOYCE-VAIO

Monoisotopic mass of neutral peptide Mr(calc): 3159.674

Variable modifications:

K26 iTRAQ4plex (K)

Ions Score: 68.52 Expect: 0.000

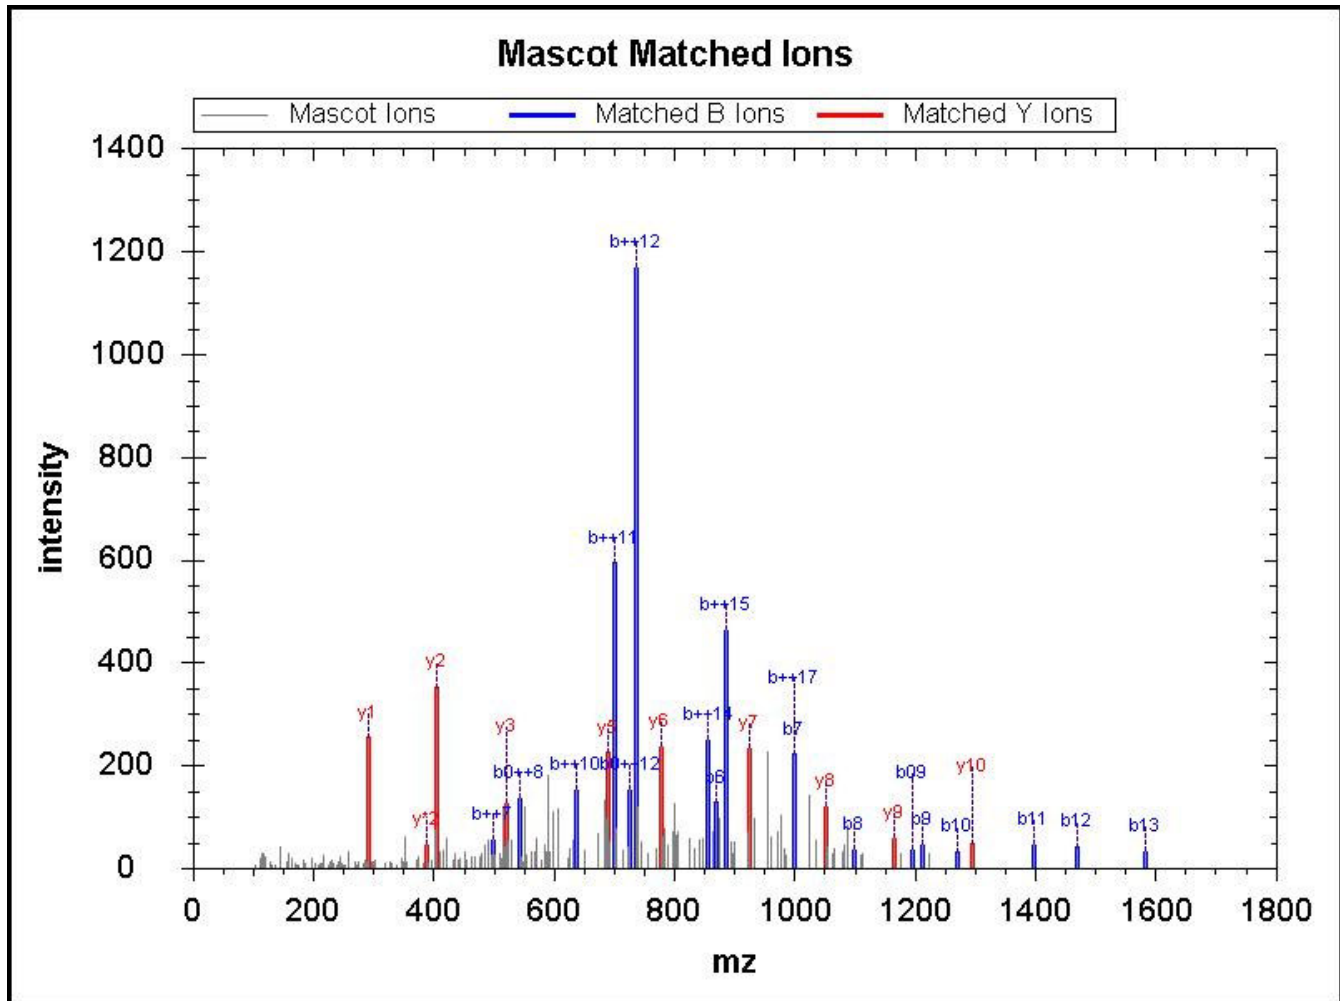

| No | b        | b++    | b*       | b*++   | b0       | b0++   | Seq | y        | y++      | y*       | y*++     | y0       | y0++     | RevNo |
|----|----------|--------|----------|--------|----------|--------|-----|----------|----------|----------|----------|----------|----------|-------|
| 1  | 232.14   | 116.57 |          |        | 214.13   | 107.57 | S   |          |          |          |          |          |          | 26    |
| 2  | 345.23   | 173.12 |          |        | 327.21   | 164.11 | I   | 2,929.51 | 1,465.26 | 2,912.48 | 1,456.74 | 2,911.50 | 1,456.25 | 25    |
| 3  | 432.26   | 216.63 |          |        | 414.25   | 207.63 | S   | 2,816.42 | 1,408.71 | 2,799.40 | 1,400.20 | 2,798.41 | 1,399.71 | 24    |
| 4  | 569.32   | 285.16 |          |        | 551.31   | 276.16 | H   | 2,729.39 | 1,365.20 | 2,712.36 | 1,356.69 | 2,711.38 | 1,356.19 | 23    |
| 5  | 732.38   | 366.69 |          |        | 714.37   | 357.69 | Y   | 2,592.33 | 1,296.67 | 2,575.30 | 1,288.16 | 2,574.32 | 1,287.66 | 22    |
| 6  | 869.44   | 435.22 |          |        | 851.43   | 426.22 | H   | 2,429.27 | 1,215.14 | 2,412.24 | 1,206.62 | 2,411.26 | 1,206.13 | 21    |
| 7  | 998.48   | 499.74 |          |        | 980.47   | 490.74 | E   | 2,292.21 | 1,146.61 | 2,275.18 | 1,138.09 | 2,274.20 | 1,137.60 | 20    |
| 8  | 1,099.53 | 550.27 |          |        | 1,081.52 | 541.26 | T   | 2,163.17 | 1,082.09 | 2,146.14 | 1,073.57 | 2,145.16 | 1,073.08 | 19    |
| 9  | 1,212.61 | 606.81 |          |        | 1,194.60 | 597.80 | L   | 2,062.12 | 1,031.56 | 2,045.09 | 1,023.05 | 2,044.11 | 1,022.56 | 18    |
| 10 | 1,269.63 | 635.32 |          |        | 1,251.62 | 626.32 | G   | 1,949.03 | 975.02   | 1,932.01 | 966.51   | 1,931.02 | 966.02   | 17    |
| 11 | 1,398.68 | 699.84 |          |        | 1,380.67 | 690.84 | E   | 1,892.01 | 946.51   | 1,874.99 | 938.00   | 1,874.00 | 937.51   | 16    |
| 12 | 1,469.71 | 735.36 |          |        | 1,451.70 | 726.36 | A   | 1,762.97 | 881.99   | 1,745.94 | 873.48   | 1,744.96 | 872.98   | 15    |
| 13 | 1,582.80 | 791.90 |          |        | 1,564.79 | 782.90 | L   | 1,691.93 | 846.47   | 1,674.91 | 837.96   | 1,673.92 | 837.47   | 14    |
| 14 | 1,710.86 | 855.93 | 1,693.83 | 847.42 | 1,692.85 | 846.93 | Q   | 1,578.85 | 789.93   | 1,561.82 | 781.42   | 1,560.84 | 780.92   | 13    |
| 15 | 1,767.88 | 884.44 | 1,750.85 | 875.93 | 1,749.87 | 875.44 | G   | 1,450.79 | 725.90   | 1,433.76 | 717.39   | 1,432.78 | 716.89   | 12    |
| 16 | 1,866.95 | 933.98 | 1,849.92 | 925.46 | 1,848.94 | 924.97 | V   | 1,393.77 | 697.39   | 1,376.74 | 688.88   | 1,375.76 | 688.38   | 11    |
| 17 | 1,995.99 | 998.50 | 1,978.96 | 989.99 | 1,977.98 | 989.49 | E   | 1,294.70 | 647.85   | 1,277.67 | 639.34   | 1,276.69 | 638.85   | 10    |

|    |          |          |          |          |          |          |   |          |        |          |        |          |        |   |
|----|----------|----------|----------|----------|----------|----------|---|----------|--------|----------|--------|----------|--------|---|
| 18 | 2,109.07 | 1,055.04 | 2,092.05 | 1,046.53 | 2,091.06 | 1,046.04 | L | 1,165.66 | 583.33 | 1,148.63 | 574.82 | 1,147.65 | 574.33 | 9 |
| 19 | 2,238.12 | 1,119.56 | 2,221.09 | 1,111.05 | 2,220.11 | 1,110.56 | E | 1,052.57 | 526.79 | 1,035.55 | 518.28 | 1,034.56 | 517.79 | 8 |
| 20 | 2,385.18 | 1,193.10 | 2,368.16 | 1,184.58 | 2,367.17 | 1,184.09 | F | 923.53   | 462.27 | 906.51   | 453.76 | 905.52   | 453.26 | 7 |
| 21 | 2,472.22 | 1,236.61 | 2,455.19 | 1,228.10 | 2,454.21 | 1,227.61 | S | 776.46   | 388.74 | 759.44   | 380.22 | 758.45   | 379.73 | 6 |
| 22 | 2,529.24 | 1,265.12 | 2,512.21 | 1,256.61 | 2,511.23 | 1,256.12 | G | 689.43   | 345.22 | 672.40   | 336.71 | 671.42   | 336.21 | 5 |
| 23 | 2,642.32 | 1,321.66 | 2,625.30 | 1,313.15 | 2,624.31 | 1,312.66 | L | 632.41   | 316.71 | 615.38   | 308.20 | 614.40   | 307.70 | 4 |
| 24 | 2,757.35 | 1,379.18 | 2,740.32 | 1,370.66 | 2,739.34 | 1,370.17 | D | 519.33   | 260.17 | 502.30   | 251.65 | 501.32   | 251.16 | 3 |
| 25 | 2,870.43 | 1,435.72 | 2,853.41 | 1,427.21 | 2,852.42 | 1,426.71 | I | 404.30   | 202.65 | 387.27   | 194.14 |          |        | 2 |
| 26 |          |          |          |          |          |          | K | 291.21   | 146.11 | 274.19   | 137.60 |          |        | 1 |

Query 80672 Hit 1

MS/MS Fragmentation of **GIGGIFFDDLSPSKEEVFR**

Found in **sp|P36551|HEM6\_HUMAN**, Coproporphyrinogen-III oxidase

Match to Query 80672: 2515.287 from (839.4363,3+)

Title: 907: Scan 2008 (rt=54.6505, f=3, i=307) [D:\lab212\membrane\Grace\Joyce\iTRAQ\_36\_2.raw]

Data File: Submitted from 20120508-1(merge) by Mascot Daemon on JOYCE-VAIO

Monoisotopic mass of neutral peptide Mr(calc): 2515.287

Variable modifications:

K15 :iTRAQ4plex (K)

Ions Score: 68.47 Expect: 0.000

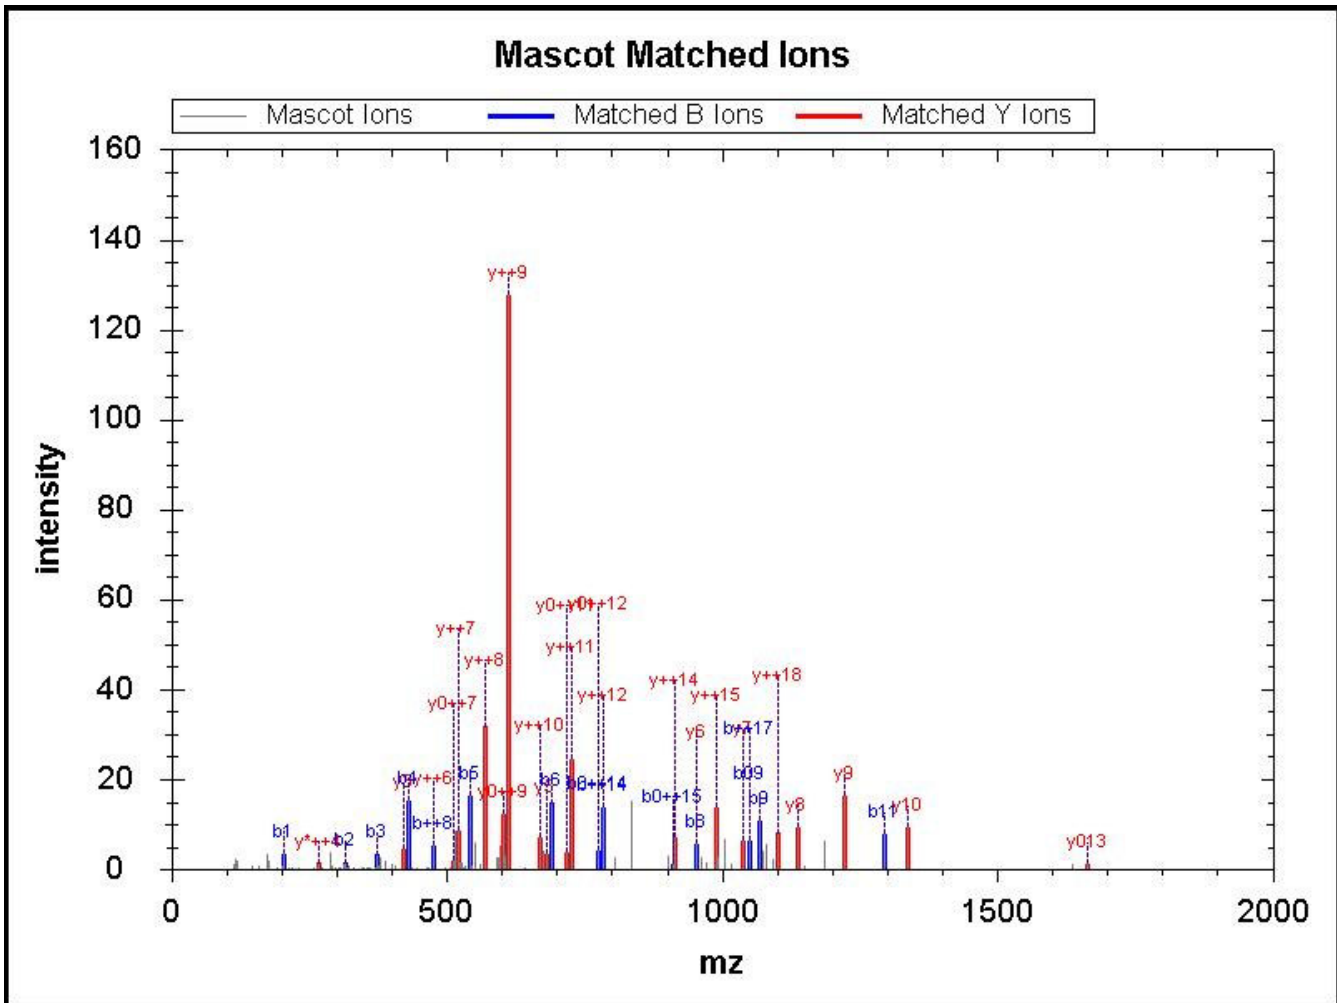

| No | b      | b++    | b* | b*++ | b0 | b0++ | Seq | y        | y++      | y*       | y*++     | y0       | y0++     | RevNo |
|----|--------|--------|----|------|----|------|-----|----------|----------|----------|----------|----------|----------|-------|
| 1  | 202.13 | 101.57 |    |      |    |      | G   |          |          |          |          |          |          | 20    |
| 2  | 315.21 | 158.11 |    |      |    |      | I   | 2,315.17 | 1,158.09 | 2,298.14 | 1,149.57 | 2,297.16 | 1,149.08 | 19    |
| 3  | 372.24 | 186.62 |    |      |    |      | G   | 2,202.08 | 1,101.55 | 2,185.06 | 1,093.03 | 2,184.07 | 1,092.54 | 18    |
| 4  | 429.26 | 215.13 |    |      |    |      | G   | 2,145.06 | 1,073.03 | 2,128.04 | 1,064.52 | 2,127.05 | 1,064.03 | 17    |
| 5  | 542.34 | 271.67 |    |      |    |      | I   | 2,088.04 | 1,044.52 | 2,071.01 | 1,036.01 | 2,070.03 | 1,035.52 | 16    |

|    |          |          |          |          |          |          |   |          |        |          |        |          |        |    |
|----|----------|----------|----------|----------|----------|----------|---|----------|--------|----------|--------|----------|--------|----|
| 6  | 689.41   | 345.21   |          |          |          |          | F | 1,974.96 | 987.98 | 1,957.93 | 979.47 | 1,956.95 | 978.98 | 15 |
| 7  | 836.48   | 418.74   |          |          |          |          | F | 1,827.89 | 914.45 | 1,810.86 | 905.93 | 1,809.88 | 905.44 | 14 |
| 8  | 951.51   | 476.26   |          |          | 933.49   | 467.25   | D | 1,680.82 | 840.91 | 1,663.79 | 832.40 | 1,662.81 | 831.91 | 13 |
| 9  | 1,066.53 | 533.77   |          |          | 1,048.52 | 524.76   | D | 1,565.79 | 783.40 | 1,548.77 | 774.89 | 1,547.78 | 774.39 | 12 |
| 10 | 1,179.62 | 590.31   |          |          | 1,161.61 | 581.31   | L | 1,450.77 | 725.89 | 1,433.74 | 717.37 | 1,432.76 | 716.88 | 11 |
| 11 | 1,294.64 | 647.83   |          |          | 1,276.63 | 638.82   | D | 1,337.68 | 669.34 | 1,320.66 | 660.83 | 1,319.67 | 660.34 | 10 |
| 12 | 1,381.68 | 691.34   |          |          | 1,363.67 | 682.34   | S | 1,222.65 | 611.83 | 1,205.63 | 603.32 | 1,204.64 | 602.83 | 9  |
| 13 | 1,478.73 | 739.87   |          |          | 1,460.72 | 730.86   | P | 1,135.62 | 568.32 | 1,118.60 | 559.80 | 1,117.61 | 559.31 | 8  |
| 14 | 1,565.76 | 783.38   |          |          | 1,547.75 | 774.38   | S | 1,038.57 | 519.79 | 1,021.54 | 511.28 | 1,020.56 | 510.78 | 7  |
| 15 | 1,837.96 | 919.48   | 1,820.93 | 910.97   | 1,819.95 | 910.48   | K | 951.54   | 476.27 | 934.51   | 467.76 | 933.53   | 467.27 | 6  |
| 16 | 1,967.00 | 984.00   | 1,949.97 | 975.49   | 1,948.99 | 975.00   | E | 679.34   | 340.17 | 662.31   | 331.66 | 661.33   | 331.17 | 5  |
| 17 | 2,096.04 | 1,048.52 | 2,079.02 | 1,040.01 | 2,078.03 | 1,039.52 | E | 550.30   | 275.65 | 533.27   | 267.14 | 532.29   | 266.65 | 4  |
| 18 | 2,195.11 | 1,098.06 | 2,178.08 | 1,089.55 | 2,177.10 | 1,089.05 | V | 421.26   | 211.13 | 404.23   | 202.62 |          |        | 3  |
| 19 | 2,342.18 | 1,171.59 | 2,325.15 | 1,163.08 | 2,324.17 | 1,162.59 | F | 322.19   | 161.60 | 305.16   | 153.08 |          |        | 2  |
| 20 |          |          |          |          |          |          | R | 175.12   | 88.06  | 158.09   | 79.55  |          |        | 1  |

Query 74215 Hit 1

MS/MS Fragmentation of **IDFSDIMVLGDINTKPK**

Found in **sp|P55011|S12A2\_HUMAN**, Solute carrier family 12 member 2 OS=Homo sapiens GN=SLC12A2 PE=1 SV=1

Match to Query 74215: 2337.306 from (780.1094, 3+)

Title: 973: Sum of 2 scans in range 2108 (rt=57.1074, f=4, i=646) to 2109 (rt=57.1329, f=4, i=647)

[D:\lab212\membrane\Grace\Joyce\iTRAQ\_41\_1.raw]

Data File: Submitted from 20120508-1(merge) by Mascot Daemon on JOYCE-VAIO

Monoisotopic mass of neutral peptide Mr(calc): 2337.306

Variable modifications:

K15 iTRAQ4plex (K)

K17 iTRAQ4plex (K)

Ions Score: 68.46 Expect: 0.000

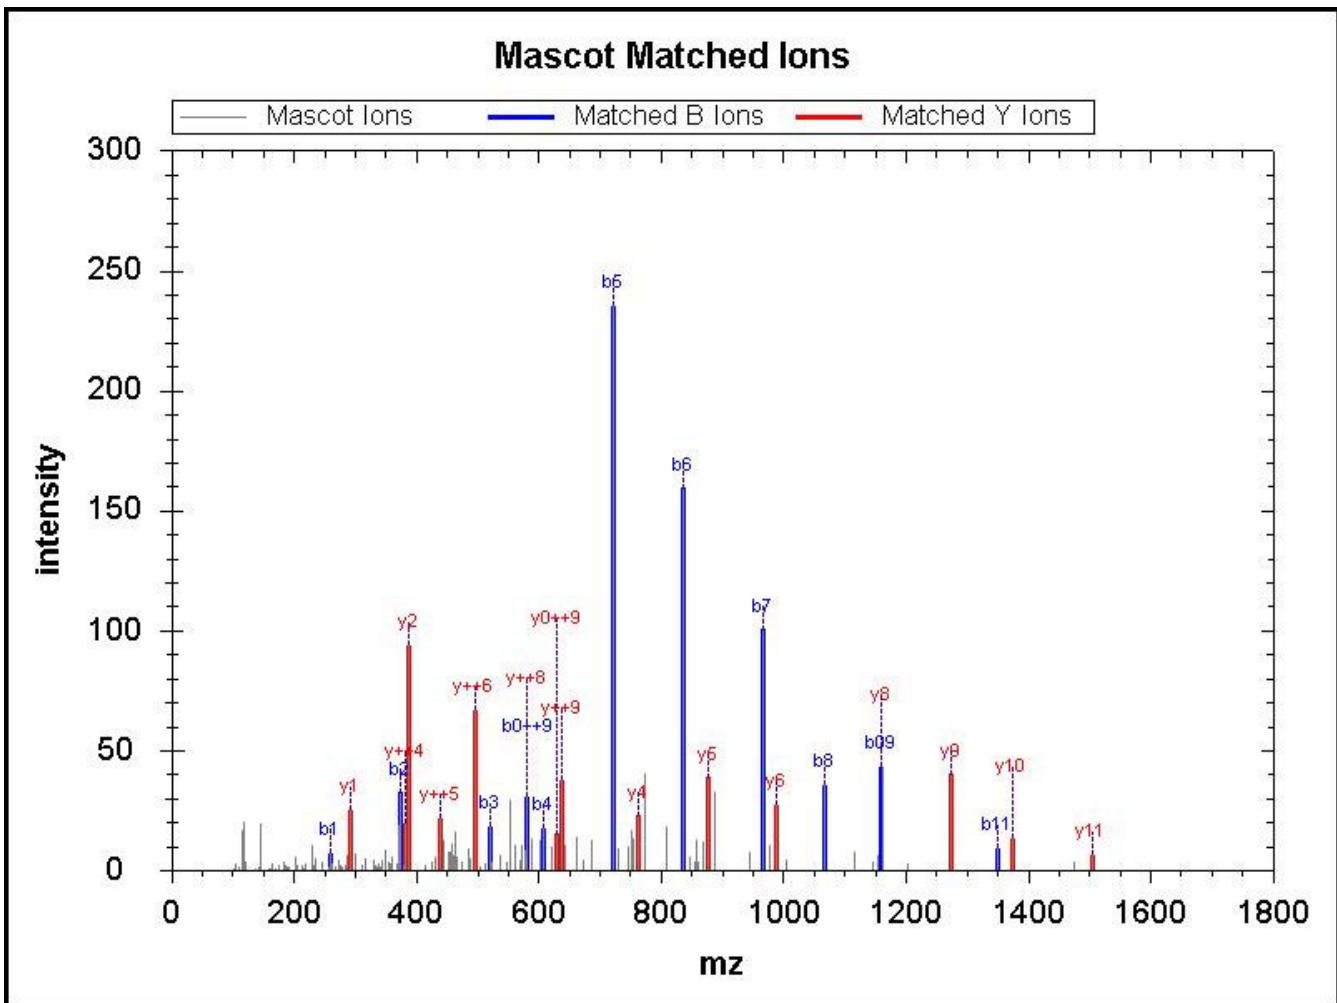

| No | b        | b++      | b*       | b*++     | b0       | b0++     | Seq | y        | y++      | y*       | y*++     | y0       | y0++     | RevNo |
|----|----------|----------|----------|----------|----------|----------|-----|----------|----------|----------|----------|----------|----------|-------|
| 1  | 258.19   | 129.60   |          |          |          |          | I   |          |          |          |          |          |          | 17    |
| 2  | 373.22   | 187.11   |          |          | 355.21   | 178.11   | D   | 2,081.12 | 1,041.06 | 2,064.09 | 1,032.55 | 2,063.11 | 1,032.06 | 16    |
| 3  | 520.29   | 260.65   |          |          | 502.28   | 251.64   | F   | 1,966.09 | 983.55   | 1,949.07 | 975.04   | 1,948.08 | 974.54   | 15    |
| 4  | 607.32   | 304.16   |          |          | 589.31   | 295.16   | S   | 1,819.02 | 910.02   | 1,802.00 | 901.50   | 1,801.01 | 901.01   | 14    |
| 5  | 722.35   | 361.68   |          |          | 704.34   | 352.67   | D   | 1,731.99 | 866.50   | 1,714.97 | 857.99   | 1,713.98 | 857.49   | 13    |
| 6  | 835.43   | 418.22   |          |          | 817.42   | 409.21   | I   | 1,616.96 | 808.99   | 1,599.94 | 800.47   | 1,598.95 | 799.98   | 12    |
| 7  | 966.47   | 483.74   |          |          | 948.46   | 474.73   | M   | 1,503.88 | 752.44   | 1,486.85 | 743.93   | 1,485.87 | 743.44   | 11    |
| 8  | 1,065.54 | 533.27   |          |          | 1,047.53 | 524.27   | V   | 1,372.84 | 686.92   | 1,355.81 | 678.41   | 1,354.83 | 677.92   | 10    |
| 9  | 1,178.62 | 589.82   |          |          | 1,160.61 | 580.81   | L   | 1,273.77 | 637.39   | 1,256.75 | 628.88   | 1,255.76 | 628.38   | 9     |
| 10 | 1,235.65 | 618.33   |          |          | 1,217.64 | 609.32   | G   | 1,160.69 | 580.85   | 1,143.66 | 572.33   | 1,142.68 | 571.84   | 8     |
| 11 | 1,350.67 | 675.84   |          |          | 1,332.66 | 666.83   | D   | 1,103.67 | 552.34   | 1,086.64 | 543.82   | 1,085.66 | 543.33   | 7     |
| 12 | 1,463.76 | 732.38   |          |          | 1,445.75 | 723.38   | I   | 988.64   | 494.82   | 971.61   | 486.31   | 970.63   | 485.82   | 6     |
| 13 | 1,577.80 | 789.40   | 1,560.77 | 780.89   | 1,559.79 | 780.40   | N   | 875.56   | 438.28   | 858.53   | 429.77   | 857.54   | 429.28   | 5     |
| 14 | 1,678.85 | 839.93   | 1,661.82 | 831.41   | 1,660.84 | 830.92   | T   | 761.51   | 381.26   | 744.49   | 372.75   | 743.50   | 372.25   | 4     |
| 15 | 1,951.05 | 976.03   | 1,934.02 | 967.51   | 1,933.03 | 967.02   | K   | 660.46   | 330.74   | 643.44   | 322.22   |          |          | 3     |
| 16 | 2,048.10 | 1,024.55 | 2,031.07 | 1,016.04 | 2,030.09 | 1,015.55 | P   | 388.27   | 194.64   | 371.24   | 186.12   |          |          | 2     |
| 17 |          |          |          |          |          |          | K   | 291.21   | 146.11   | 274.19   | 137.60   |          |          | 1     |

Query 98837 Hit 1

MS/MS Fragmentation of **KLMHQALLGGLIQDAPNYGWEVAQPVPDWR**

Found in **sp|Q9NNW7|TRXR2\_HUMAN**, Thioredoxin reductase 2

Match to Query 98837: 3625.833from(907.4654,4+)

Title: 1023: Sum of 2 scans in range 2253 (rt=60.327, f=4, i=688) to 2254 (rt=60.3524, f=4, i=689)

[D:\lab212\membrane\Grace\Joyce\TRAQ\_42\_1.raw]

Data File: Submitted from 20120508-1(merge) by Mascot Daemon on JOYCE-VAIO

Monoisotopic mass of neutral peptide Mr(calc): 3625.833

Variable modifications:

M3 :Oxidation (M), 63.99828

Ions Score: 68.33 Expect: 0.000

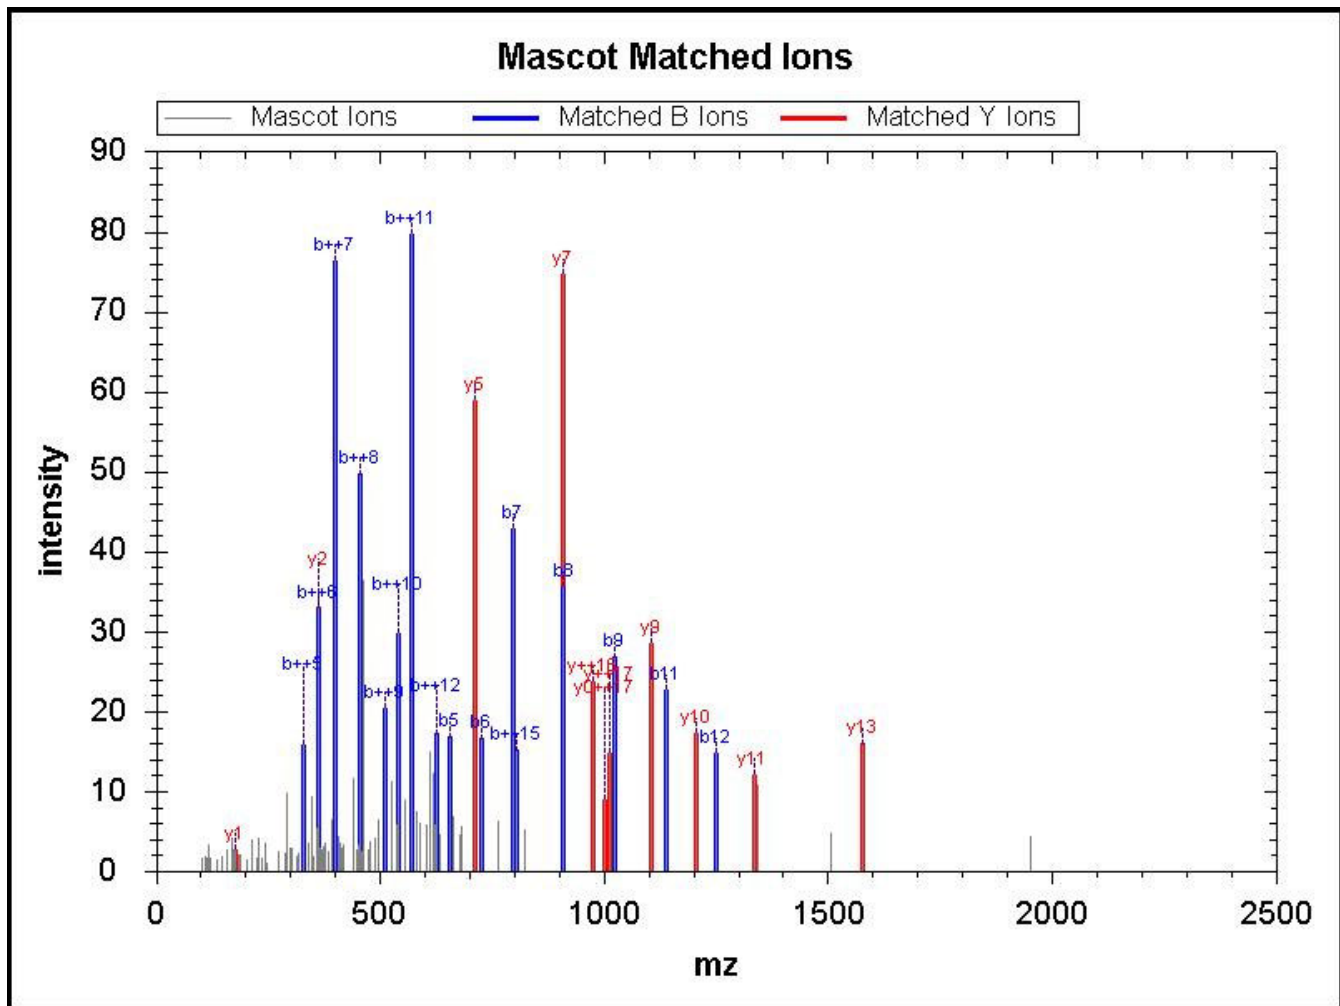

| No | b        | b++      | b*       | b***     | b0       | b0++     | Seq | y        | y++      | y*       | y***     | y0       | y0++     | RevNo |
|----|----------|----------|----------|----------|----------|----------|-----|----------|----------|----------|----------|----------|----------|-------|
| 1  | 129.10   | 65.05    | 112.08   | 56.54    |          |          | K   |          |          |          |          |          |          | 32    |
| 2  | 242.19   | 121.60   | 225.16   | 113.08   |          |          | L   | 3,498.74 | 1,749.87 | 3,481.71 | 1,741.36 | 3,480.73 | 1,740.87 | 31    |
| 3  | 389.22   | 195.11   | 372.20   | 186.60   |          |          | M   | 3,385.65 | 1,693.33 | 3,368.63 | 1,684.82 | 3,367.64 | 1,684.33 | 30    |
| 4  | 526.28   | 263.64   | 509.25   | 255.13   |          |          | H   | 3,238.62 | 1,619.81 | 3,221.59 | 1,611.30 | 3,220.61 | 1,610.81 | 29    |
| 5  | 654.34   | 327.67   | 637.31   | 319.16   |          |          | Q   | 3,101.56 | 1,551.28 | 3,084.53 | 1,542.77 | 3,083.55 | 1,542.28 | 28    |
| 6  | 725.38   | 363.19   | 708.35   | 354.68   |          |          | A   | 2,973.50 | 1,487.25 | 2,956.47 | 1,478.74 | 2,955.49 | 1,478.25 | 27    |
| 7  | 796.41   | 398.71   | 779.39   | 390.20   |          |          | A   | 2,902.46 | 1,451.74 | 2,885.44 | 1,443.22 | 2,884.45 | 1,442.73 | 26    |
| 8  | 909.50   | 455.25   | 892.47   | 446.74   |          |          | L   | 2,831.43 | 1,416.22 | 2,814.40 | 1,407.70 | 2,813.42 | 1,407.21 | 25    |
| 9  | 1,022.58 | 511.79   | 1,005.55 | 503.28   |          |          | L   | 2,718.34 | 1,359.67 | 2,701.32 | 1,351.16 | 2,700.33 | 1,350.67 | 24    |
| 10 | 1,079.60 | 540.31   | 1,062.58 | 531.79   |          |          | G   | 2,605.26 | 1,303.13 | 2,588.23 | 1,294.62 | 2,587.25 | 1,294.13 | 23    |
| 11 | 1,136.62 | 568.82   | 1,119.60 | 560.30   |          |          | G   | 2,548.24 | 1,274.62 | 2,531.21 | 1,266.11 | 2,530.23 | 1,265.62 | 22    |
| 12 | 1,249.71 | 625.36   | 1,232.68 | 616.84   |          |          | L   | 2,491.22 | 1,246.11 | 2,474.19 | 1,237.60 | 2,473.20 | 1,237.11 | 21    |
| 13 | 1,362.79 | 681.90   | 1,345.77 | 673.39   |          |          | I   | 2,378.13 | 1,189.57 | 2,361.10 | 1,181.06 | 2,360.12 | 1,180.56 | 20    |
| 14 | 1,490.85 | 745.93   | 1,473.82 | 737.42   |          |          | Q   | 2,265.05 | 1,133.03 | 2,248.02 | 1,124.51 | 2,247.04 | 1,124.02 | 19    |
| 15 | 1,605.88 | 803.44   | 1,588.85 | 794.93   | 1,587.87 | 794.44   | D   | 2,136.99 | 1,069.00 | 2,119.96 | 1,060.48 | 2,118.98 | 1,059.99 | 18    |
| 16 | 1,676.92 | 838.96   | 1,659.89 | 830.45   | 1,658.90 | 829.96   | A   | 2,021.96 | 1,011.48 | 2,004.94 | 1,002.97 | 2,003.95 | 1,002.48 | 17    |
| 17 | 1,773.97 | 887.49   | 1,756.94 | 878.97   | 1,755.96 | 878.48   | P   | 1,950.92 | 975.97   | 1,933.90 | 967.45   | 1,932.91 | 966.96   | 16    |
| 18 | 1,888.01 | 944.51   | 1,870.98 | 936.00   | 1,870.00 | 935.50   | N   | 1,853.87 | 927.44   | 1,836.85 | 918.93   | 1,835.86 | 918.43   | 15    |
| 19 | 2,051.07 | 1,026.04 | 2,034.05 | 1,017.53 | 2,033.06 | 1,017.04 | Y   | 1,739.83 | 870.42   | 1,722.80 | 861.90   | 1,721.82 | 861.41   | 14    |
| 20 | 2,108.10 | 1,054.55 | 2,091.07 | 1,046.04 | 2,090.09 | 1,045.55 | G   | 1,576.77 | 788.89   | 1,559.74 | 780.37   | 1,558.76 | 779.88   | 13    |



|    |          |          |          |          |          |          |   |          |        |          |        |          |        |    |
|----|----------|----------|----------|----------|----------|----------|---|----------|--------|----------|--------|----------|--------|----|
| 21 | 2,294.18 | 1,147.59 | 2,277.15 | 1,139.08 | 2,276.16 | 1,138.59 | W | 1,519.74 | 760.38 | 1,502.72 | 751.86 | 1,501.73 | 751.37 | 12 |
| 22 | 2,423.22 | 1,212.11 | 2,406.19 | 1,203.60 | 2,405.21 | 1,203.11 | E | 1,333.66 | 667.34 | 1,316.64 | 658.82 | 1,315.65 | 658.33 | 11 |
| 23 | 2,522.29 | 1,261.65 | 2,505.26 | 1,253.13 | 2,504.28 | 1,252.64 | V | 1,204.62 | 602.81 | 1,187.60 | 594.30 | 1,186.61 | 593.81 | 10 |
| 24 | 2,593.32 | 1,297.17 | 2,576.30 | 1,288.65 | 2,575.31 | 1,288.16 | A | 1,105.55 | 553.28 | 1,088.53 | 544.77 | 1,087.54 | 544.28 | 9  |
| 25 | 2,721.38 | 1,361.19 | 2,704.36 | 1,352.68 | 2,703.37 | 1,352.19 | Q | 1,034.52 | 517.76 | 1,017.49 | 509.25 | 1,016.51 | 508.76 | 8  |
| 26 | 2,818.43 | 1,409.72 | 2,801.41 | 1,401.21 | 2,800.42 | 1,400.72 | P | 906.46   | 453.73 | 889.43   | 445.22 | 888.45   | 444.73 | 7  |
| 27 | 2,917.50 | 1,459.26 | 2,900.48 | 1,450.74 | 2,899.49 | 1,450.25 | V | 809.41   | 405.21 | 792.38   | 396.69 | 791.39   | 396.20 | 6  |
| 28 | 3,014.56 | 1,507.78 | 2,997.53 | 1,499.27 | 2,996.55 | 1,498.78 | P | 710.34   | 355.67 | 693.31   | 347.16 | 692.33   | 346.67 | 5  |
| 29 | 3,151.61 | 1,576.31 | 3,134.59 | 1,567.80 | 3,133.60 | 1,567.31 | H | 613.28   | 307.15 | 596.26   | 298.63 | 595.27   | 298.14 | 4  |
| 30 | 3,266.64 | 1,633.82 | 3,249.61 | 1,625.31 | 3,248.63 | 1,624.82 | D | 476.23   | 238.62 | 459.20   | 230.10 | 458.21   | 229.61 | 3  |
| 31 | 3,452.72 | 1,726.86 | 3,435.69 | 1,718.35 | 3,434.71 | 1,717.86 | W | 361.20   | 181.10 | 344.17   | 172.59 |          |        | 2  |
| 32 |          |          |          |          |          |          | R | 175.12   | 88.06  | 158.09   | 79.55  |          |        | 1  |

Query 20253 Hit 1

MS/MS Fragmentation of **GIAWWTDK**

Found in [sp|Q9NV96|CC50A\\_HUMAN](#), Cell cycle control protein 50A OS=Homo sapiens GN=TMEM30A PE=1 SV=1

Match to Query 20253: 1263.686from(632.8505,2+)

Title: 658: Sum of 2 scans in range 1505 (rt=43.2853, f=4, i=443) to 1506 (rt=43.3107, f=4, i=444)

[D:\lab212\membrane\GraceJoyce\iTRAQ\_33\_1.raw]

Data File: Submitted from 20120508-1(merge) by Mascot Daemon on JOYCE-VAIO

Monoisotopic mass of neutral peptide Mr(calc): 1263.686

Variable modifications:

K8 iTRAQ4plex (K)

Ions Score: 68.21 Expect: 0.000

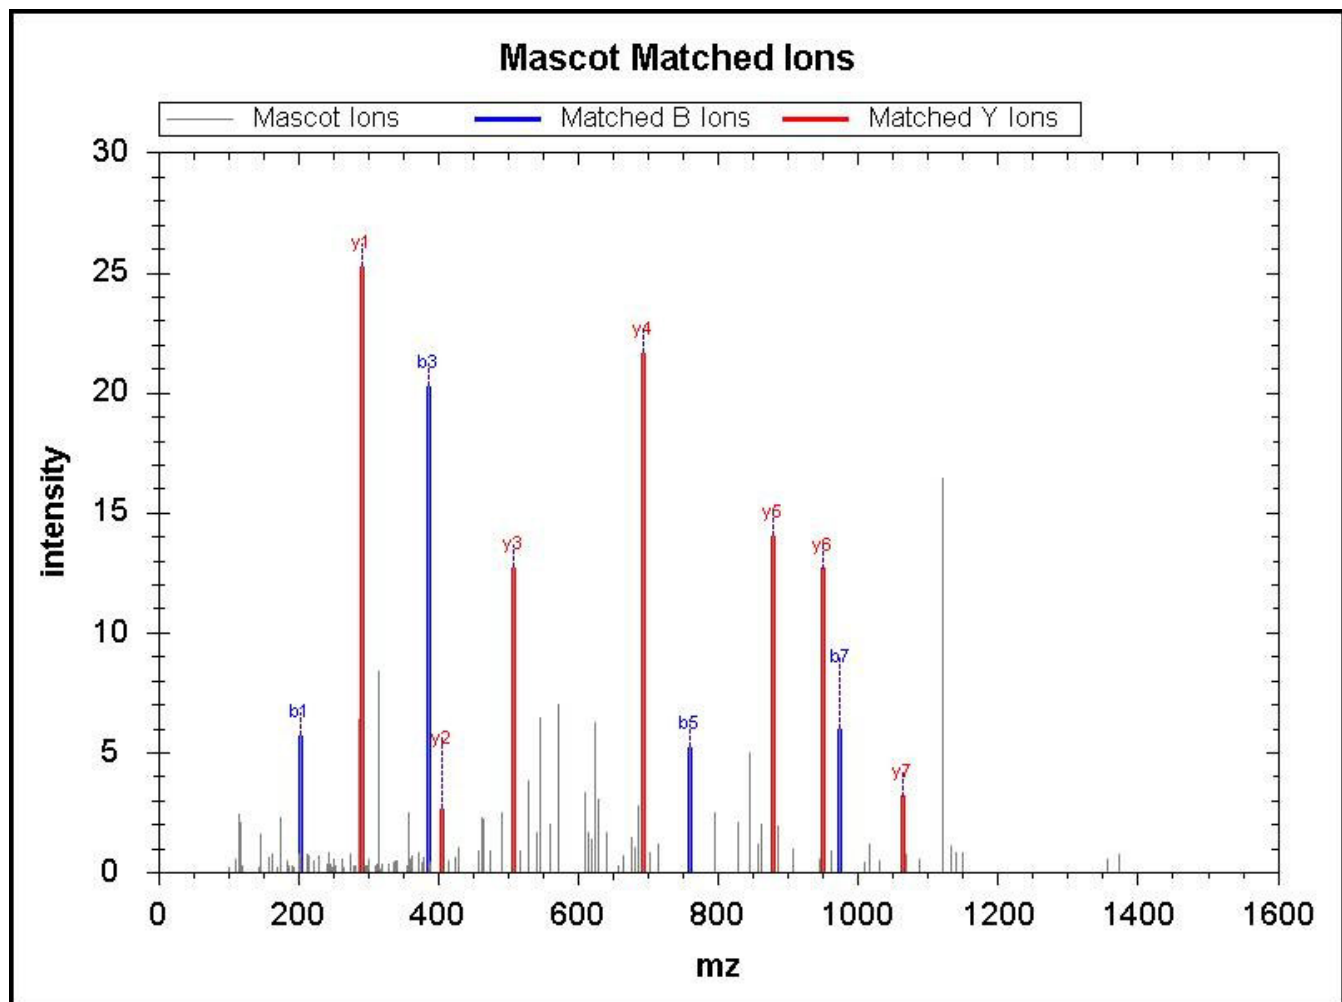

| No | b      | b++    | b0 | b0++ | Seq | y | y++ | y* | y*++ | y0 | y0++ | RevNo |
|----|--------|--------|----|------|-----|---|-----|----|------|----|------|-------|
| 1  | 202.13 | 101.57 |    |      | G   |   |     |    |      |    |      | 8     |

|   |        |        |        |        |   |          |        |          |        |          |        |   |
|---|--------|--------|--------|--------|---|----------|--------|----------|--------|----------|--------|---|
| 2 | 315.21 | 158.11 |        |        | I | 1,063.57 | 532.29 | 1,046.54 | 523.78 | 1,045.56 | 523.28 | 7 |
| 3 | 386.25 | 193.63 |        |        | A | 950.49   | 475.75 | 933.46   | 467.23 | 932.47   | 466.74 | 6 |
| 4 | 572.33 | 286.67 |        |        | W | 879.45   | 440.23 | 862.42   | 431.71 | 861.44   | 431.22 | 5 |
| 5 | 758.41 | 379.71 |        |        | W | 693.37   | 347.19 | 676.34   | 338.67 | 675.36   | 338.18 | 4 |
| 6 | 859.46 | 430.23 | 841.45 | 421.23 | T | 507.29   | 254.15 | 490.26   | 245.64 | 489.28   | 245.14 | 3 |
| 7 | 974.49 | 487.75 | 956.47 | 478.74 | D | 406.24   | 203.62 | 389.22   | 195.11 | 388.23   | 194.62 | 2 |
| 8 |        |        |        |        | K | 291.21   | 146.11 | 274.19   | 137.60 |          |        | 1 |

Query 82709 Hit 1

MS/MS Fragmentation of **GQIQEAIALINSLHPELLDTNR**

Found in [sp|Q9NWU2|CT011\\_HUMAN](#), Protein C20orf11 OS=Homo sapiens GN=C20orf11 PE=1 SV=1

Match to Query 82709: 2588.411from(863.8108,3+)

Title: 1100: Scan 2508 (rt=65.5539, f=2, i=400) [D:\lab212\membrane\Grace\Joyce\iTRAQ\_30\_2.raw]

Data File: Submitted from 20120508-1(merge) by Mascot Daemon on JOYCE-VAIO

Monoisotopic mass of neutral peptide Mr(calc): 2588.411

Variable modifications:

Ions Score: 68 Expect: 0.000

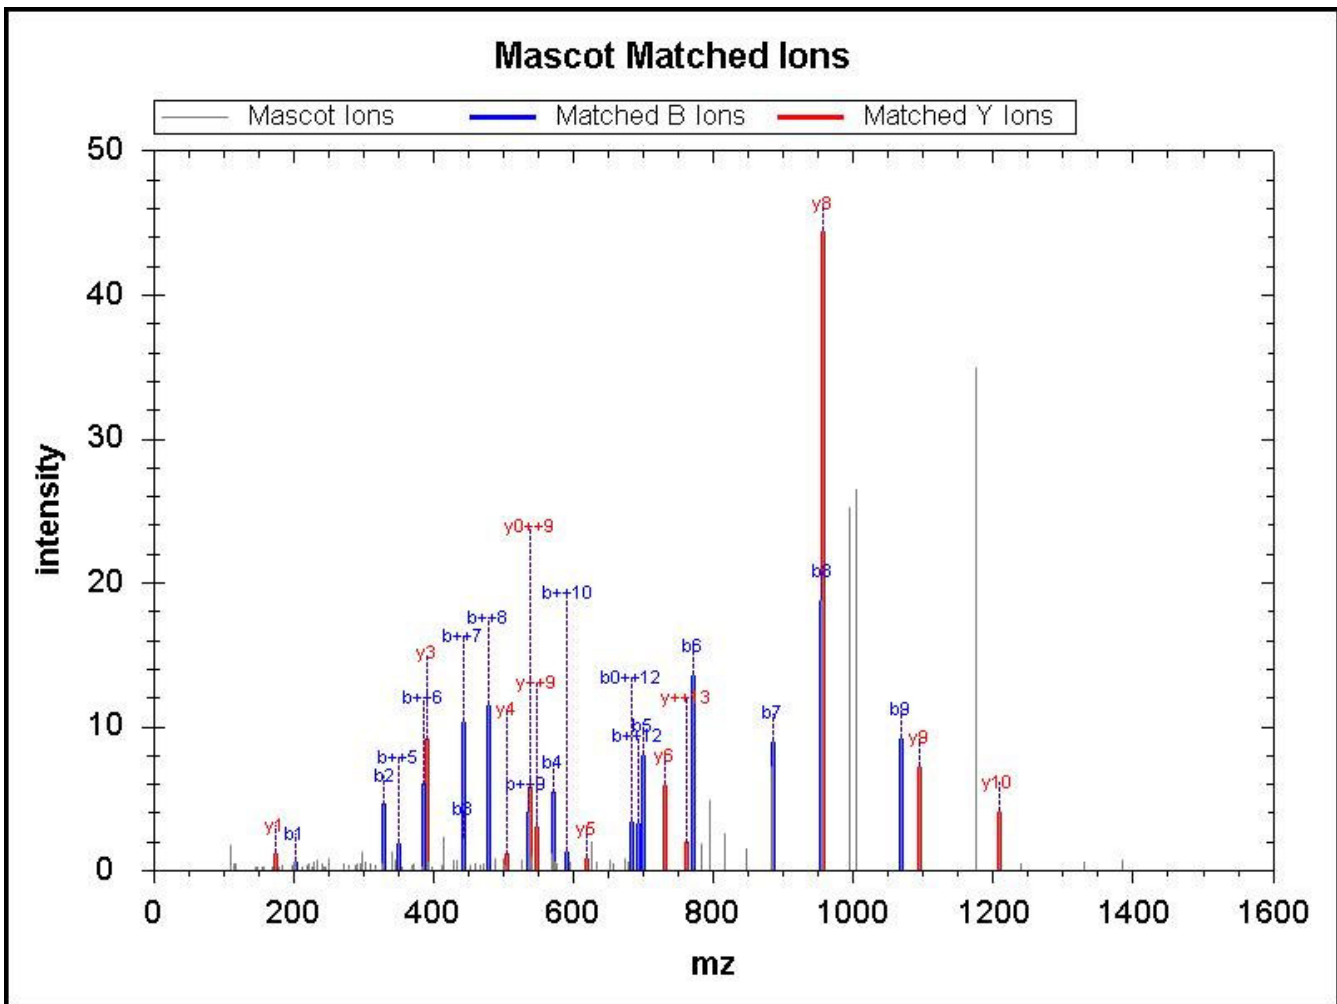

| No | b      | b++    | b*     | b*++   | b0     | b0++   | Seq | y        | y++      | y*       | y*++     | y0       | y0++     | RevNo |
|----|--------|--------|--------|--------|--------|--------|-----|----------|----------|----------|----------|----------|----------|-------|
| 1  | 202.13 | 101.57 |        |        |        |        | G   |          |          |          |          |          |          | 22    |
| 2  | 330.19 | 165.60 | 313.16 | 157.09 |        |        | Q   | 2,388.29 | 1,194.65 | 2,371.26 | 1,186.13 | 2,370.28 | 1,185.64 | 21    |
| 3  | 443.27 | 222.14 | 426.25 | 213.63 |        |        | I   | 2,260.23 | 1,130.62 | 2,243.20 | 1,122.11 | 2,242.22 | 1,121.61 | 20    |
| 4  | 571.33 | 286.17 | 554.31 | 277.66 |        |        | Q   | 2,147.15 | 1,074.08 | 2,130.12 | 1,065.56 | 2,129.14 | 1,065.07 | 19    |
| 5  | 700.37 | 350.69 | 683.35 | 342.18 | 682.36 | 341.69 | E   | 2,019.09 | 1,010.05 | 2,002.06 | 1,001.53 | 2,001.08 | 1,001.04 | 18    |
| 6  | 771.41 | 386.21 | 754.39 | 377.70 | 753.40 | 377.20 | A   | 1,890.04 | 945.53   | 1,873.02 | 937.01   | 1,872.03 | 936.52   | 17    |

|    |          |          |          |          |          |          |   |          |        |          |        |          |        |    |
|----|----------|----------|----------|----------|----------|----------|---|----------|--------|----------|--------|----------|--------|----|
| 7  | 884.50   | 442.75   | 867.47   | 434.24   | 866.49   | 433.75   | I | 1,819.01 | 910.01 | 1,801.98 | 901.49 | 1,801.00 | 901.00 | 16 |
| 8  | 955.53   | 478.27   | 938.51   | 469.76   | 937.52   | 469.26   | A | 1,705.92 | 853.47 | 1,688.90 | 844.95 | 1,687.91 | 844.46 | 15 |
| 9  | 1,068.62 | 534.81   | 1,051.59 | 526.30   | 1,050.61 | 525.81   | L | 1,634.89 | 817.95 | 1,617.86 | 809.43 | 1,616.88 | 808.94 | 14 |
| 10 | 1,181.70 | 591.35   | 1,164.67 | 582.84   | 1,163.69 | 582.35   | I | 1,521.80 | 761.40 | 1,504.78 | 752.89 | 1,503.79 | 752.40 | 13 |
| 11 | 1,295.74 | 648.38   | 1,278.72 | 639.86   | 1,277.73 | 639.37   | N | 1,408.72 | 704.86 | 1,391.69 | 696.35 | 1,390.71 | 695.86 | 12 |
| 12 | 1,382.78 | 691.89   | 1,365.75 | 683.38   | 1,364.77 | 682.89   | S | 1,294.68 | 647.84 | 1,277.65 | 639.33 | 1,276.66 | 638.84 | 11 |
| 13 | 1,495.86 | 748.43   | 1,478.83 | 739.92   | 1,477.85 | 739.43   | L | 1,207.64 | 604.33 | 1,190.62 | 595.81 | 1,189.63 | 595.32 | 10 |
| 14 | 1,632.92 | 816.96   | 1,615.89 | 808.45   | 1,614.91 | 807.96   | H | 1,094.56 | 547.78 | 1,077.53 | 539.27 | 1,076.55 | 538.78 | 9  |
| 15 | 1,729.97 | 865.49   | 1,712.95 | 856.98   | 1,711.96 | 856.48   | P | 957.50   | 479.25 | 940.47   | 470.74 | 939.49   | 470.25 | 8  |
| 16 | 1,859.01 | 930.01   | 1,841.99 | 921.50   | 1,841.00 | 921.01   | E | 860.45   | 430.73 | 843.42   | 422.21 | 842.44   | 421.72 | 7  |
| 17 | 1,972.10 | 986.55   | 1,955.07 | 978.04   | 1,954.09 | 977.55   | L | 731.40   | 366.21 | 714.38   | 357.69 | 713.39   | 357.20 | 6  |
| 18 | 2,085.18 | 1,043.09 | 2,068.16 | 1,034.58 | 2,067.17 | 1,034.09 | L | 618.32   | 309.66 | 601.29   | 301.15 | 600.31   | 300.66 | 5  |
| 19 | 2,200.21 | 1,100.61 | 2,183.18 | 1,092.10 | 2,182.20 | 1,091.60 | D | 505.24   | 253.12 | 488.21   | 244.61 | 487.23   | 244.12 | 4  |
| 20 | 2,301.26 | 1,151.13 | 2,284.23 | 1,142.62 | 2,283.25 | 1,142.13 | T | 390.21   | 195.61 | 373.18   | 187.10 | 372.20   | 186.60 | 3  |
| 21 | 2,415.30 | 1,208.15 | 2,398.27 | 1,199.64 | 2,397.29 | 1,199.15 | N | 289.16   | 145.08 | 272.14   | 136.57 |          |        | 2  |
| 22 |          |          |          |          |          |          | R | 175.12   | 88.06  | 158.09   | 79.55  |          |        | 1  |

Query 94533 Hit 1

MS/MS Fragmentation of **SISQYLHAGPPVYFVLEEGHDYTSSK**

Found in **sp|O15118|NPC1\_HUMAN**, Niemann-Pick C1 protein OS=Homo sapiens GN=NPC1 PE=1 SV=2

Match to Query 94533: 3211.609 from (803.9096,4+)

Title: 885: Sum of 2 scans in range 1962 (rt=53.7937, f=4, i=596) to 1963 (rt=53.819, f=4, i=597)

[D:\lab212\membrane\Grace\Joyce\iTRAQ\_44\_1.raw]

Data File: Submitted from 20120508-1(merge) by Mascot Daemon on JOYCE-VAIO

Monoisotopic mass of neutral peptide Mr(calc): 3211.609

Variable modifications:

K26 iTRAQ4plex (K)

Ions Score: 67.64 Expect: 0.000

### Mascot Matched Ions

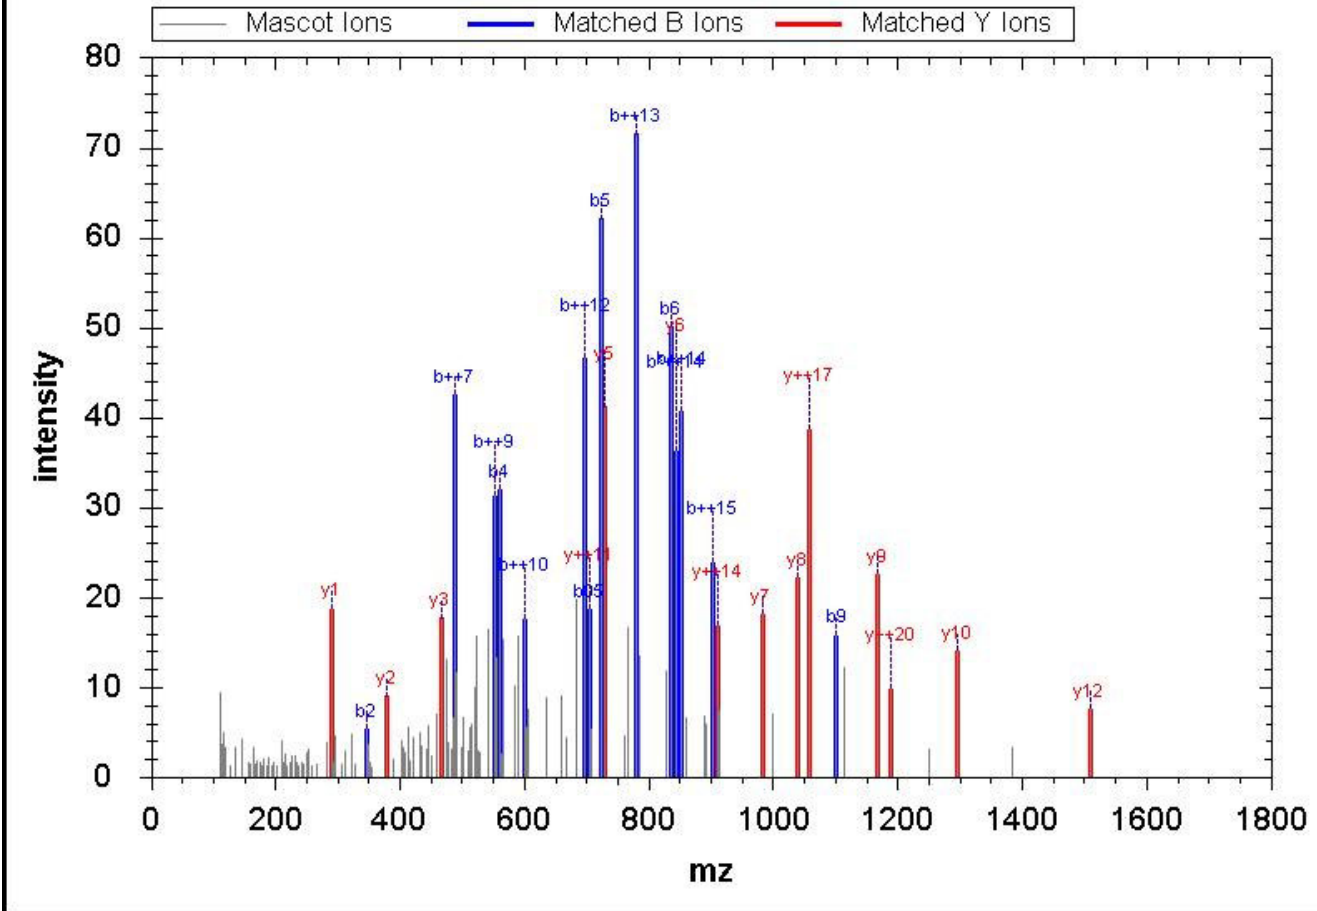

| No | b        | b++      | b*       | b*++     | b0       | b0++     | Seq | y        | y++      | y*       | y*++     | y0       | y0++     | RevNo |
|----|----------|----------|----------|----------|----------|----------|-----|----------|----------|----------|----------|----------|----------|-------|
| 1  | 232.14   | 116.57   |          |          | 214.13   | 107.57   | S   |          |          |          |          |          |          | 26    |
| 2  | 345.23   | 173.12   |          |          | 327.21   | 164.11   | I   | 2,981.48 | 1,491.24 | 2,964.45 | 1,482.73 | 2,963.47 | 1,482.24 | 25    |
| 3  | 432.26   | 216.63   |          |          | 414.25   | 207.63   | S   | 2,868.40 | 1,434.70 | 2,851.37 | 1,426.19 | 2,850.39 | 1,425.70 | 24    |
| 4  | 560.32   | 280.66   | 543.29   | 272.15   | 542.31   | 271.66   | Q   | 2,781.36 | 1,391.19 | 2,764.34 | 1,382.67 | 2,763.35 | 1,382.18 | 23    |
| 5  | 723.38   | 362.19   | 706.35   | 353.68   | 705.37   | 353.19   | Y   | 2,653.31 | 1,327.16 | 2,636.28 | 1,318.64 | 2,635.29 | 1,318.15 | 22    |
| 6  | 836.46   | 418.74   | 819.44   | 410.22   | 818.45   | 409.73   | L   | 2,490.24 | 1,245.62 | 2,473.22 | 1,237.11 | 2,472.23 | 1,236.62 | 21    |
| 7  | 973.52   | 487.26   | 956.50   | 478.75   | 955.51   | 478.26   | H   | 2,377.16 | 1,189.08 | 2,360.13 | 1,180.57 | 2,359.15 | 1,180.08 | 20    |
| 8  | 1,044.56 | 522.78   | 1,027.53 | 514.27   | 1,026.55 | 513.78   | A   | 2,240.10 | 1,120.55 | 2,223.07 | 1,112.04 | 2,222.09 | 1,111.55 | 19    |
| 9  | 1,101.58 | 551.29   | 1,084.55 | 542.78   | 1,083.57 | 542.29   | G   | 2,169.06 | 1,085.03 | 2,152.04 | 1,076.52 | 2,151.05 | 1,076.03 | 18    |
| 10 | 1,198.63 | 599.82   | 1,181.61 | 591.31   | 1,180.62 | 590.82   | P   | 2,112.04 | 1,056.52 | 2,095.01 | 1,048.01 | 2,094.03 | 1,047.52 | 17    |
| 11 | 1,295.69 | 648.35   | 1,278.66 | 639.83   | 1,277.68 | 639.34   | P   | 2,014.99 | 1,008.00 | 1,997.96 | 999.48   | 1,996.98 | 998.99   | 16    |
| 12 | 1,394.75 | 697.88   | 1,377.73 | 689.37   | 1,376.74 | 688.88   | V   | 1,917.93 | 959.47   | 1,900.91 | 950.96   | 1,899.92 | 950.47   | 15    |
| 13 | 1,557.82 | 779.41   | 1,540.79 | 770.90   | 1,539.81 | 770.41   | Y   | 1,818.87 | 909.94   | 1,801.84 | 901.42   | 1,800.86 | 900.93   | 14    |
| 14 | 1,704.89 | 852.95   | 1,687.86 | 844.43   | 1,686.88 | 843.94   | F   | 1,655.80 | 828.41   | 1,638.78 | 819.89   | 1,637.79 | 819.40   | 13    |
| 15 | 1,803.95 | 902.48   | 1,786.93 | 893.97   | 1,785.94 | 893.48   | V   | 1,508.73 | 754.87   | 1,491.71 | 746.36   | 1,490.72 | 745.87   | 12    |
| 16 | 1,917.04 | 959.02   | 1,900.01 | 950.51   | 1,899.03 | 950.02   | L   | 1,409.67 | 705.34   | 1,392.64 | 696.82   | 1,391.66 | 696.33   | 11    |
| 17 | 2,046.08 | 1,023.54 | 2,029.06 | 1,015.03 | 2,028.07 | 1,014.54 | E   | 1,296.58 | 648.79   | 1,279.56 | 640.28   | 1,278.57 | 639.79   | 10    |
| 18 | 2,175.12 | 1,088.07 | 2,158.10 | 1,079.55 | 2,157.11 | 1,079.06 | E   | 1,167.54 | 584.27   | 1,150.51 | 575.76   | 1,149.53 | 575.27   | 9     |
| 19 | 2,232.15 | 1,116.58 | 2,215.12 | 1,108.06 | 2,214.14 | 1,107.57 | G   | 1,038.50 | 519.75   | 1,021.47 | 511.24   | 1,020.49 | 510.75   | 8     |
| 20 | 2,369.20 | 1,185.11 | 2,352.18 | 1,176.59 | 2,351.19 | 1,176.10 | H   | 981.48   | 491.24   | 964.45   | 482.73   | 963.47   | 482.24   | 7     |
| 21 | 2,484.23 | 1,242.62 | 2,467.20 | 1,234.11 | 2,466.22 | 1,233.61 | D   | 844.42   | 422.71   | 827.39   | 414.20   | 826.41   | 413.71   | 6     |
| 22 | 2,647.29 | 1,324.15 | 2,630.27 | 1,315.64 | 2,629.28 | 1,315.15 | Y   | 729.39   | 365.20   | 712.36   | 356.69   | 711.38   | 356.19   | 5     |
| 23 | 2,748.34 | 1,374.67 | 2,731.32 | 1,366.16 | 2,730.33 | 1,365.67 | T   | 566.33   | 283.67   | 549.30   | 275.15   | 548.32   | 274.66   | 4     |

|    |          |          |          |          |          |          |   |        |        |        |        |        |        |   |
|----|----------|----------|----------|----------|----------|----------|---|--------|--------|--------|--------|--------|--------|---|
| 24 | 2,835.37 | 1,418.19 | 2,818.35 | 1,409.68 | 2,817.36 | 1,409.19 | S | 465.28 | 233.14 | 448.25 | 224.63 | 447.27 | 224.14 | 3 |
| 25 | 2,922.41 | 1,461.71 | 2,905.38 | 1,453.19 | 2,904.40 | 1,452.70 | S | 378.25 | 189.63 | 361.22 | 181.11 | 360.24 | 180.62 | 2 |
| 26 |          |          |          |          |          |          | K | 291.21 | 146.11 | 274.19 | 137.60 |        |        | 1 |

Query 40192 Hit 1

MS/MS Fragmentation of **TFGIWTLSSVIR**

Found in **sp|Q9UKR5|ERG28\_HUMAN**, Probable ergosterol biosynthetic protein 28 OS=Homo sapiens GN=C14orf1 PE=1 SV=1  
 Match to Query 40192: 1635.945from(818.9797,2+)

Title: 1385: Scan 3194 (rt=80.892, f=3, i=498) [D:\lab212\membrane\Grace\Joyce\iTRAQ\_22\_1.raw]

Data File:Submitted from 20120508-1(merge) by Mascot Daemon on JOYCE-VAIO

Monoisotopic mass of neutral peptide Mr(calc): 1635.945

Variable modifications:

Ions Score: 67.35 Expect: 0.000

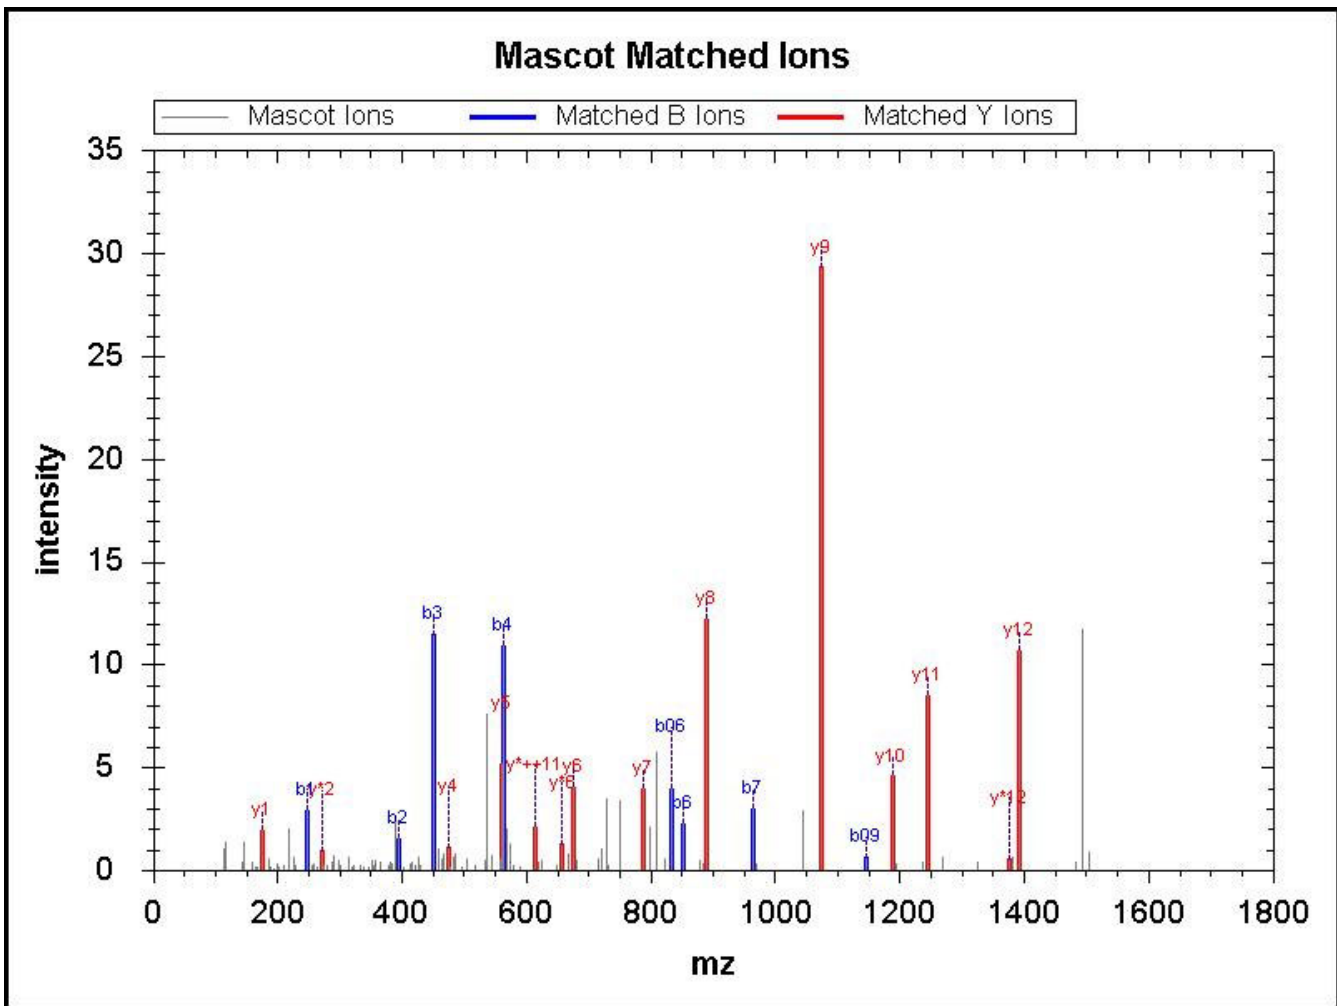

| No | b        | b++    | b0       | b0++   | Seq | y        | y++    | y*       | y*++   | y0       | y0++   | RevNo |
|----|----------|--------|----------|--------|-----|----------|--------|----------|--------|----------|--------|-------|
| 1  | 246.16   | 123.58 | 228.15   | 114.58 | T   |          |        |          |        |          |        | 13    |
| 2  | 393.23   | 197.12 | 375.21   | 188.11 | F   | 1,391.80 | 696.41 | 1,374.78 | 687.89 | 1,373.79 | 687.40 | 12    |
| 3  | 450.25   | 225.63 | 432.24   | 216.62 | G   | 1,244.74 | 622.87 | 1,227.71 | 614.36 | 1,226.73 | 613.87 | 11    |
| 4  | 563.33   | 282.17 | 545.32   | 273.16 | I   | 1,187.71 | 594.36 | 1,170.69 | 585.85 | 1,169.70 | 585.36 | 10    |
| 5  | 749.41   | 375.21 | 731.40   | 366.20 | W   | 1,074.63 | 537.82 | 1,057.60 | 529.31 | 1,056.62 | 528.81 | 9     |
| 6  | 850.46   | 425.73 | 832.45   | 416.73 | T   | 888.55   | 444.78 | 871.52   | 436.27 | 870.54   | 435.77 | 8     |
| 7  | 963.54   | 482.27 | 945.53   | 473.27 | L   | 787.50   | 394.26 | 770.48   | 385.74 | 769.49   | 385.25 | 7     |
| 8  | 1,076.63 | 538.82 | 1,058.62 | 529.81 | L   | 674.42   | 337.71 | 657.39   | 329.20 | 656.41   | 328.71 | 6     |
| 9  | 1,163.66 | 582.33 | 1,145.65 | 573.33 | S   | 561.34   | 281.17 | 544.31   | 272.66 | 543.32   | 272.17 | 5     |
| 10 | 1,250.69 | 625.85 | 1,232.68 | 616.84 | S   | 474.30   | 237.66 | 457.28   | 229.14 | 456.29   | 228.65 | 4     |
| 11 | 1,349.76 | 675.38 | 1,331.75 | 666.38 | V   | 387.27   | 194.14 | 370.24   | 185.63 |          |        | 3     |

|    |          |        |          |        |   |        |        |        |        |  |  |   |
|----|----------|--------|----------|--------|---|--------|--------|--------|--------|--|--|---|
| 12 | 1,462.84 | 731.92 | 1,444.83 | 722.92 | I | 288.20 | 144.61 | 271.18 | 136.09 |  |  | 2 |
| 13 |          |        |          |        | R | 175.12 | 88.06  | 158.09 | 79.55  |  |  | 1 |

Query 42592 Hit 1

MS/MS Fragmentation of **VILHGEHAVVHGK**

Found in [sp|Q03426|KIME\\_HUMAN](#), Mevalonate kinase OS=Homo sapiens GN=MVK PE=1 SV=1

Match to Query 42592: 1682.983from(562.0017,3+)

Title: 171: Scan 396 (rt=18.7496, f=2, i=67) [D:\lab212\membrane\Grace\Joyce\iTRAQ\_55\_2\_330.raw]

Data File: Submitted from 20120508-1(merge) by Mascot Daemon on JOYCE-VAIO

Monoisotopic mass of neutral peptide Mr(calc): 1682.983

Variable modifications:

K13 :iTRAQ4plex (K)

Ions Score: 67.26 Expect: 0.000

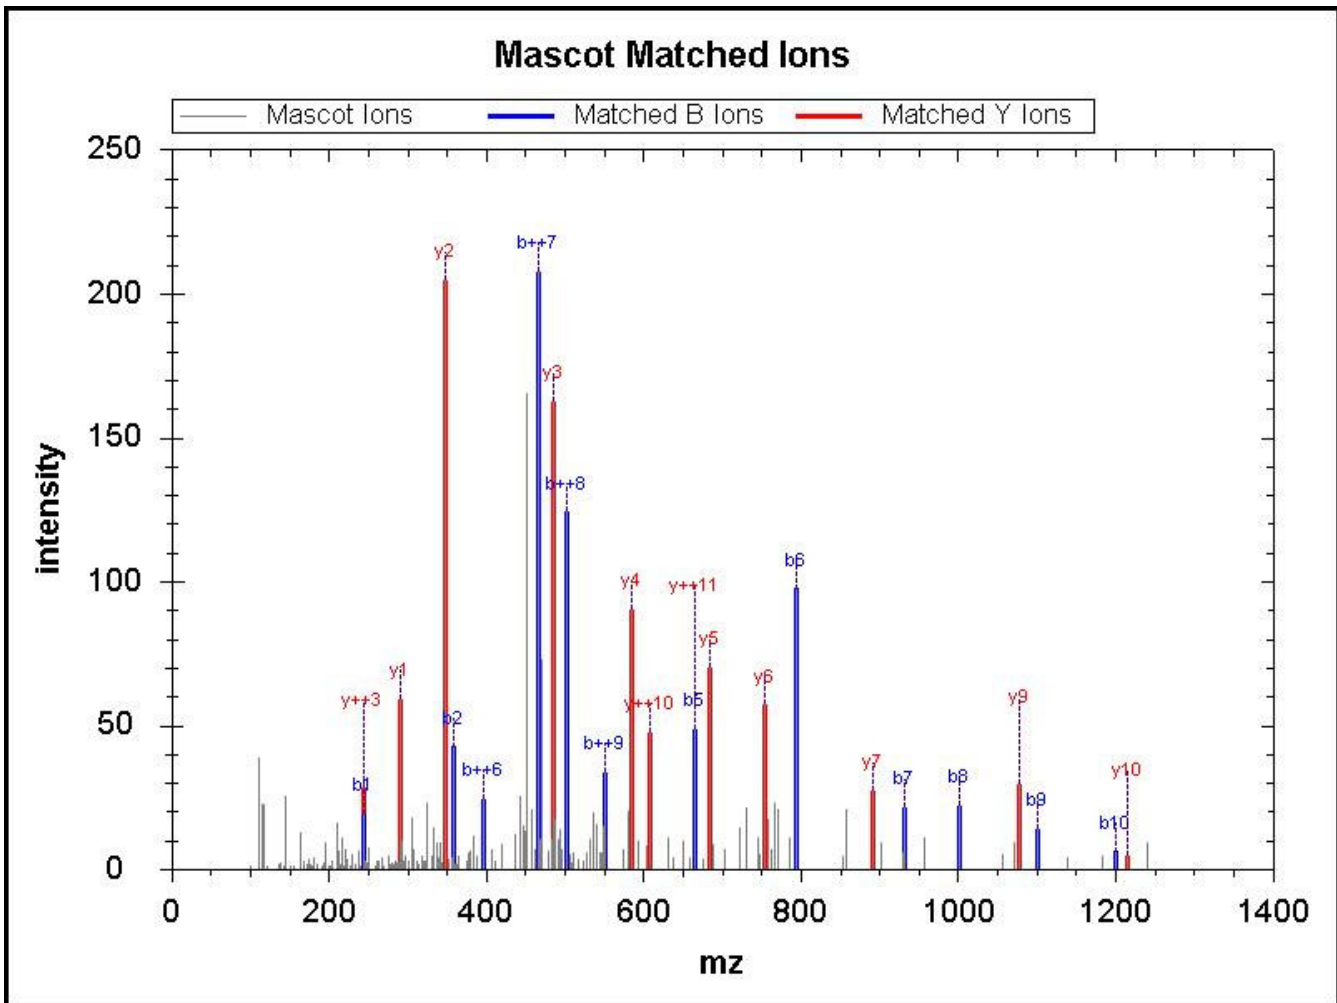

| No | b        | b++    | b0       | b0++   | Seq | y        | y++    | y*       | y*++   | y0       | y0++   | RevNo |
|----|----------|--------|----------|--------|-----|----------|--------|----------|--------|----------|--------|-------|
| 1  | 244.18   | 122.59 |          |        | V   |          |        |          |        |          |        | 13    |
| 2  | 357.26   | 179.13 |          |        | I   | 1,440.82 | 720.91 | 1,423.79 | 712.40 | 1,422.81 | 711.91 | 12    |
| 3  | 470.35   | 235.68 |          |        | L   | 1,327.74 | 664.37 | 1,310.71 | 655.86 | 1,309.72 | 655.37 | 11    |
| 4  | 607.40   | 304.21 |          |        | H   | 1,214.65 | 607.83 | 1,197.62 | 599.32 | 1,196.64 | 598.82 | 10    |
| 5  | 664.43   | 332.72 |          |        | G   | 1,077.59 | 539.30 | 1,060.57 | 530.79 | 1,059.58 | 530.29 | 9     |
| 6  | 793.47   | 397.24 | 775.46   | 388.23 | E   | 1,020.57 | 510.79 | 1,003.54 | 502.28 | 1,002.56 | 501.78 | 8     |
| 7  | 930.53   | 465.77 | 912.52   | 456.76 | H   | 891.53   | 446.27 | 874.50   | 437.75 |          |        | 7     |
| 8  | 1,001.56 | 501.29 | 983.55   | 492.28 | A   | 754.47   | 377.74 | 737.44   | 369.22 |          |        | 6     |
| 9  | 1,100.63 | 550.82 | 1,082.62 | 541.82 | V   | 683.43   | 342.22 | 666.41   | 333.71 |          |        | 5     |
| 10 | 1,199.70 | 600.35 | 1,181.69 | 591.35 | V   | 584.36   | 292.69 | 567.34   | 284.17 |          |        | 4     |
| 11 | 1,336.76 | 668.88 | 1,318.75 | 659.88 | H   | 485.30   | 243.15 | 468.27   | 234.64 |          |        | 3     |

|    |          |        |          |        |   |        |        |        |        |  |  |   |
|----|----------|--------|----------|--------|---|--------|--------|--------|--------|--|--|---|
| 12 | 1,393.78 | 697.39 | 1,375.77 | 688.39 | G | 348.24 | 174.62 | 331.21 | 166.11 |  |  | 2 |
| 13 |          |        |          |        | K | 291.21 | 146.11 | 274.19 | 137.60 |  |  | 1 |

Query 94374 Hit 1

MS/MS Fragmentation of **AADHLEALAAIEDFFLEHEALGISMAK**

Found in **sp|Q13144|EI2BE\_HUMAN**, Translation initiation factor eIF-2B subunit epsilon OS=Homo sapiens GN=EIF2B5 PE=1 SV=3

Match to Query 94374: 3199.65from(800.9197,4+)

Title: 1270: Scan 2787 (rt=72.332, f=2, i=458) [D:\lab212\membrane\Grace\Joyce\iTRAQ\_45\_1.raw]

Data File:Submitted from 20120508-1(merge) by Mascot Daemon on JOYCE-VAIO

Monoisotopic mass of neutral peptide Mr(calc): 3199.65

Variable modifications:

K27 :iTRAQ4plex (K)

Ions Score: 67.18 Expect: 0.000

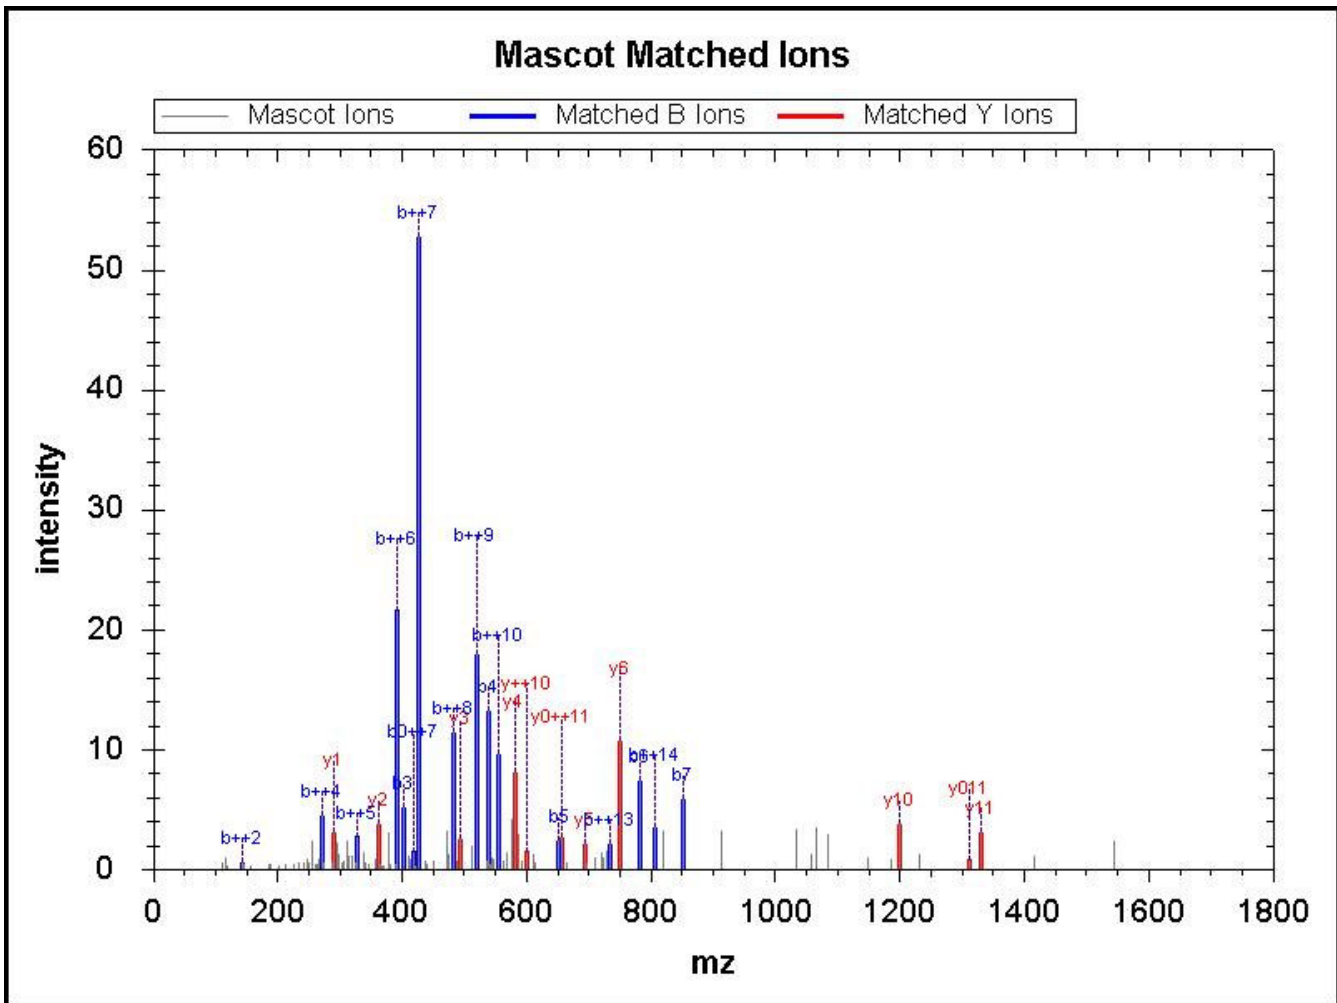

| No | b        | b++    | b0       | b0++   | Seq | y        | y++      | y*       | y*++     | y0       | y0++     | RevNo |
|----|----------|--------|----------|--------|-----|----------|----------|----------|----------|----------|----------|-------|
| 1  | 216.15   | 108.58 |          |        | A   |          |          |          |          |          |          | 27    |
| 2  | 287.18   | 144.10 |          |        | A   | 2,985.51 | 1,493.26 | 2,968.49 | 1,484.75 | 2,967.50 | 1,484.26 | 26    |
| 3  | 402.21   | 201.61 | 384.20   | 192.60 | D   | 2,914.48 | 1,457.74 | 2,897.45 | 1,449.23 | 2,896.47 | 1,448.74 | 25    |
| 4  | 539.27   | 270.14 | 521.26   | 261.13 | H   | 2,799.45 | 1,400.23 | 2,782.42 | 1,391.72 | 2,781.44 | 1,391.22 | 24    |
| 5  | 652.35   | 326.68 | 634.34   | 317.68 | L   | 2,662.39 | 1,331.70 | 2,645.36 | 1,323.19 | 2,644.38 | 1,322.69 | 23    |
| 6  | 781.40   | 391.20 | 763.39   | 382.20 | E   | 2,549.31 | 1,275.16 | 2,532.28 | 1,266.64 | 2,531.30 | 1,266.15 | 22    |
| 7  | 852.43   | 426.72 | 834.42   | 417.71 | A   | 2,420.27 | 1,210.64 | 2,403.24 | 1,202.12 | 2,402.25 | 1,201.63 | 21    |
| 8  | 965.52   | 483.26 | 947.51   | 474.26 | L   | 2,349.23 | 1,175.12 | 2,332.20 | 1,166.60 | 2,331.22 | 1,166.11 | 20    |
| 9  | 1,036.55 | 518.78 | 1,018.54 | 509.78 | A   | 2,236.14 | 1,118.58 | 2,219.12 | 1,110.06 | 2,218.13 | 1,109.57 | 19    |
| 10 | 1,107.59 | 554.30 | 1,089.58 | 545.29 | A   | 2,165.11 | 1,083.06 | 2,148.08 | 1,074.54 | 2,147.10 | 1,074.05 | 18    |
| 11 | 1,220.68 | 610.84 | 1,202.67 | 601.84 | I   | 2,094.07 | 1,047.54 | 2,077.04 | 1,039.03 | 2,076.06 | 1,038.53 | 17    |

|    |          |          |          |          |   |          |        |          |        |          |        |    |
|----|----------|----------|----------|----------|---|----------|--------|----------|--------|----------|--------|----|
| 12 | 1,349.72 | 675.36   | 1,331.71 | 666.36   | E | 1,980.99 | 991.00 | 1,963.96 | 982.48 | 1,962.98 | 981.99 | 16 |
| 13 | 1,464.75 | 732.88   | 1,446.73 | 723.87   | D | 1,851.94 | 926.48 | 1,834.92 | 917.96 | 1,833.93 | 917.47 | 15 |
| 14 | 1,611.81 | 806.41   | 1,593.80 | 797.41   | F | 1,736.92 | 868.96 | 1,719.89 | 860.45 | 1,718.91 | 859.96 | 14 |
| 15 | 1,758.88 | 879.94   | 1,740.87 | 870.94   | F | 1,589.85 | 795.43 | 1,572.82 | 786.91 | 1,571.84 | 786.42 | 13 |
| 16 | 1,871.97 | 936.49   | 1,853.96 | 927.48   | L | 1,442.78 | 721.89 | 1,425.75 | 713.38 | 1,424.77 | 712.89 | 12 |
| 17 | 2,001.01 | 1,001.01 | 1,983.00 | 992.00   | E | 1,329.70 | 665.35 | 1,312.67 | 656.84 | 1,311.68 | 656.35 | 11 |
| 18 | 2,138.07 | 1,069.54 | 2,120.06 | 1,060.53 | H | 1,200.65 | 600.83 | 1,183.63 | 592.32 | 1,182.64 | 591.82 | 10 |
| 19 | 2,267.11 | 1,134.06 | 2,249.10 | 1,125.05 | E | 1,063.59 | 532.30 | 1,046.57 | 523.79 | 1,045.58 | 523.30 | 9  |
| 20 | 2,338.15 | 1,169.58 | 2,320.14 | 1,160.57 | A | 934.55   | 467.78 | 917.52   | 459.27 | 916.54   | 458.77 | 8  |
| 21 | 2,451.23 | 1,226.12 | 2,433.22 | 1,217.11 | L | 863.51   | 432.26 | 846.49   | 423.75 | 845.50   | 423.26 | 7  |
| 22 | 2,508.25 | 1,254.63 | 2,490.24 | 1,245.62 | G | 750.43   | 375.72 | 733.40   | 367.21 | 732.42   | 366.71 | 6  |
| 23 | 2,621.34 | 1,311.17 | 2,603.33 | 1,302.17 | I | 693.41   | 347.21 | 676.38   | 338.69 | 675.40   | 338.20 | 5  |
| 24 | 2,708.37 | 1,354.69 | 2,690.36 | 1,345.68 | S | 580.32   | 290.67 | 563.30   | 282.15 | 562.31   | 281.66 | 4  |
| 25 | 2,839.41 | 1,420.21 | 2,821.40 | 1,411.20 | M | 493.29   | 247.15 | 476.27   | 238.64 |          |        | 3  |
| 26 | 2,910.45 | 1,455.73 | 2,892.44 | 1,446.72 | A | 362.25   | 181.63 | 345.23   | 173.12 |          |        | 2  |
| 27 |          |          |          |          | K | 291.21   | 146.11 | 274.19   | 137.60 |          |        | 1  |

Query 36271 Hit 1

MS/MS Fragmentation of **KIEQELTAAK**

Found in **sp|Q9H444|CHM4B\_HUMAN**, Charged multivesicular body protein 4b OS=Homo sapiens GN=CHMP4B PE=1 SV=1

Match to Query 36271: 1561.94from(521.654,3+)

Title: 338: Scan 874 (rt=29.144, f=3, i=130) [D:\lab212\membrane\Grace\Joyce\47\_1.raw]

Data File:Submitted from 20120508-1(merge) by Mascot Daemon on JOYCE-VAIO

Monoisotopic mass of neutral peptide Mr(calc): 1561.94

Variable modifications:

K1 :iTRAQ4plex (K)

K10 :iTRAQ4plex (K)

Ions Score: 66.91 Expect: 0.000





### Mascot Matched Ions

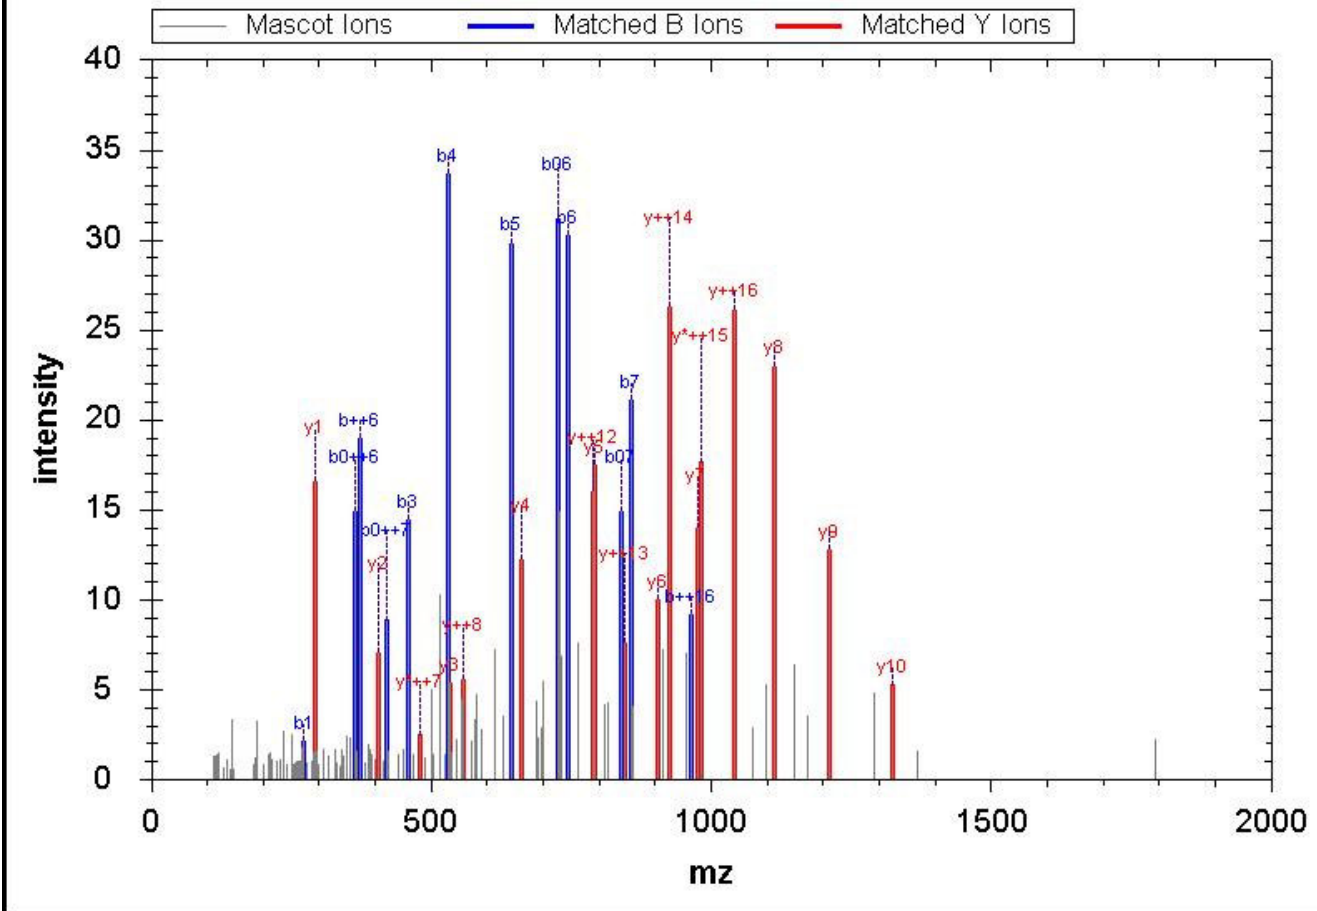

| No | b        | b++      | b*       | b*++     | b0       | b0++     | Seq | y        | y++      | y*       | y*++     | y0       | y0++     | RevNo |
|----|----------|----------|----------|----------|----------|----------|-----|----------|----------|----------|----------|----------|----------|-------|
| 1  | 273.17   | 137.09   | 256.14   | 128.57   |          |          | Q   |          |          |          |          |          |          | 24    |
| 2  | 330.19   | 165.60   | 313.16   | 157.09   |          |          | G   | 2,763.52 | 1,382.26 | 2,746.49 | 1,373.75 | 2,745.51 | 1,373.26 | 23    |
| 3  | 458.25   | 229.63   | 441.22   | 221.11   |          |          | Q   | 2,706.49 | 1,353.75 | 2,689.47 | 1,345.24 | 2,688.48 | 1,344.75 | 22    |
| 4  | 529.29   | 265.15   | 512.26   | 256.63   |          |          | A   | 2,578.44 | 1,289.72 | 2,561.41 | 1,281.21 | 2,560.43 | 1,280.72 | 21    |
| 5  | 642.37   | 321.69   | 625.34   | 313.17   |          |          | I   | 2,507.40 | 1,254.20 | 2,490.37 | 1,245.69 | 2,489.39 | 1,245.20 | 20    |
| 6  | 743.42   | 372.21   | 726.39   | 363.70   | 725.41   | 363.21   | T   | 2,394.31 | 1,197.66 | 2,377.29 | 1,189.15 | 2,376.30 | 1,188.66 | 19    |
| 7  | 856.50   | 428.75   | 839.47   | 420.24   | 838.49   | 419.75   | L   | 2,293.27 | 1,147.14 | 2,276.24 | 1,138.62 | 2,275.26 | 1,138.13 | 18    |
| 8  | 955.57   | 478.29   | 938.54   | 469.77   | 937.56   | 469.28   | V   | 2,180.18 | 1,090.60 | 2,163.16 | 1,082.08 | 2,162.17 | 1,081.59 | 17    |
| 9  | 1,056.62 | 528.81   | 1,039.59 | 520.30   | 1,038.61 | 519.81   | T   | 2,081.11 | 1,041.06 | 2,064.09 | 1,032.55 | 2,063.10 | 1,032.06 | 16    |
| 10 | 1,184.68 | 592.84   | 1,167.65 | 584.33   | 1,166.66 | 583.84   | Q   | 1,980.07 | 990.54   | 1,963.04 | 982.02   | 1,962.06 | 981.53   | 15    |
| 11 | 1,347.74 | 674.37   | 1,330.71 | 665.86   | 1,329.73 | 665.37   | Y   | 1,852.01 | 926.51   | 1,834.98 | 917.99   | 1,834.00 | 917.50   | 14    |
| 12 | 1,462.77 | 731.89   | 1,445.74 | 723.37   | 1,444.76 | 722.88   | D   | 1,688.95 | 844.98   | 1,671.92 | 836.46   | 1,670.93 | 835.97   | 13    |
| 13 | 1,575.85 | 788.43   | 1,558.82 | 779.92   | 1,557.84 | 779.42   | I   | 1,573.92 | 787.46   | 1,556.89 | 778.95   | 1,555.91 | 778.46   | 12    |
| 14 | 1,712.91 | 856.96   | 1,695.88 | 848.44   | 1,694.90 | 847.95   | H   | 1,460.83 | 730.92   | 1,443.81 | 722.41   | 1,442.82 | 721.92   | 11    |
| 15 | 1,825.99 | 913.50   | 1,808.97 | 904.99   | 1,807.98 | 904.49   | L   | 1,323.78 | 662.39   | 1,306.75 | 653.88   | 1,305.76 | 653.39   | 10    |
| 16 | 1,925.06 | 963.03   | 1,908.03 | 954.52   | 1,907.05 | 954.03   | V   | 1,210.69 | 605.85   | 1,193.66 | 597.34   | 1,192.68 | 596.84   | 9     |
| 17 | 2,062.12 | 1,031.56 | 2,045.09 | 1,023.05 | 2,044.11 | 1,022.56 | H   | 1,111.62 | 556.32   | 1,094.60 | 547.80   | 1,093.61 | 547.31   | 8     |
| 18 | 2,133.16 | 1,067.08 | 2,116.13 | 1,058.57 | 2,115.15 | 1,058.08 | A   | 974.56   | 487.79   | 957.54   | 479.27   | 956.55   | 478.78   | 7     |
| 19 | 2,246.24 | 1,123.62 | 2,229.21 | 1,115.11 | 2,228.23 | 1,114.62 | I   | 903.53   | 452.27   | 886.50   | 443.75   | 885.52   | 443.26   | 6     |
| 20 | 2,375.28 | 1,188.15 | 2,358.26 | 1,179.63 | 2,357.27 | 1,179.14 | E   | 790.44   | 395.72   | 773.42   | 387.21   | 772.43   | 386.72   | 5     |
| 21 | 2,504.33 | 1,252.67 | 2,487.30 | 1,244.15 | 2,486.32 | 1,243.66 | E   | 661.40   | 331.20   | 644.37   | 322.69   | 643.39   | 322.20   | 4     |
| 22 | 2,632.39 | 1,316.70 | 2,615.36 | 1,308.18 | 2,614.37 | 1,307.69 | Q   | 532.36   | 266.68   | 515.33   | 258.17   |          |          | 3     |
| 23 | 2,745.47 | 1,373.24 | 2,728.44 | 1,364.72 | 2,727.46 | 1,364.23 | I   | 404.30   | 202.65   | 387.27   | 194.14   |          |          | 2     |
| 24 |          |          |          |          |          |          | K   | 291.21   | 146.11   | 274.19   | 137.60   |          |          | 1     |

Query 65874 Hit 1

MS/MS Fragmentation of **ASLAAILEHSLFSTEKQ**

Found in **sp|Q14149|MORC3\_HUMAN**, MORC family CW-type zinc finger protein 3 OS=Homo sapiens GN=MORC3 PE=1 SV=3

Match to Query 65874: 2132.173from(711.7318,3+)

Title: 1057: Scan 2308 (rt=61.5961, f=2, i=376) [D:\lab212\membrane\Grace\Joyce\iTRAQ\_39\_2.raw]

Data File: Submitted from 20120508-1(merge) by Mascot Daemon on JOYCE-VAIO

Monoisotopic mass of neutral peptide Mr(calc): 2132.173

Variable modifications:

K17 :iTRAQ4plex (K)

Ions Score: 66.51 Expect: 0.000

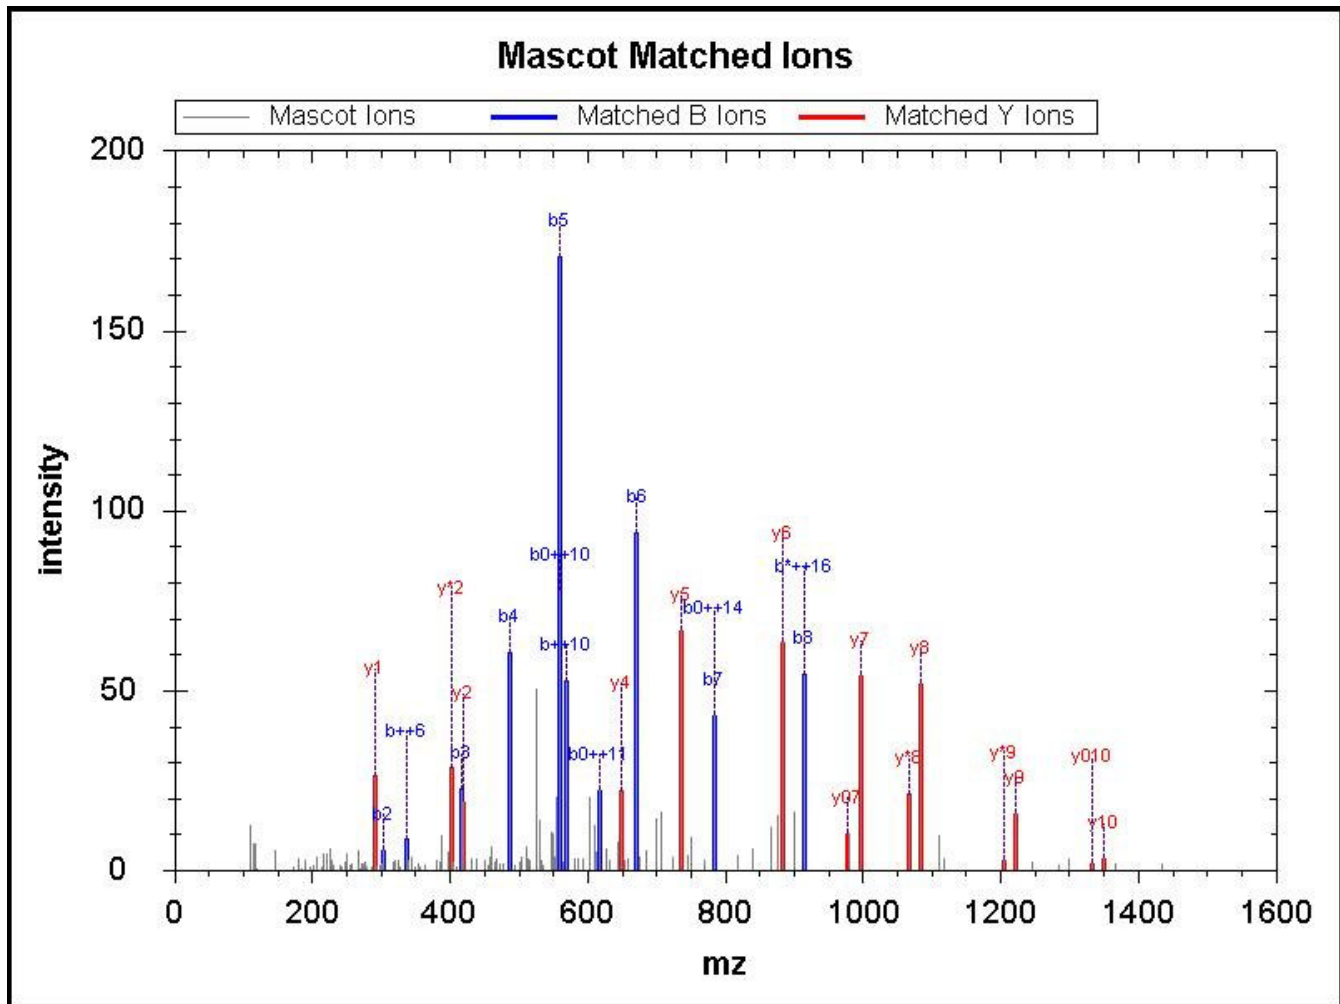

| No | b        | b++    | b* | b*++ | b0       | b0++   | Seq | y        | y++    | y*       | y*++   | y0       | y0++   | RevNo |
|----|----------|--------|----|------|----------|--------|-----|----------|--------|----------|--------|----------|--------|-------|
| 1  | 216.15   | 108.58 |    |      |          |        | A   |          |        |          |        |          |        | 17    |
| 2  | 303.18   | 152.09 |    |      | 285.17   | 143.09 | S   | 1,918.04 | 959.52 | 1,901.01 | 951.01 | 1,900.03 | 950.52 | 16    |
| 3  | 416.26   | 208.63 |    |      | 398.25   | 199.63 | L   | 1,831.01 | 916.01 | 1,813.98 | 907.49 | 1,813.00 | 907.00 | 15    |
| 4  | 487.30   | 244.15 |    |      | 469.29   | 235.15 | A   | 1,717.92 | 859.47 | 1,700.90 | 850.95 | 1,699.91 | 850.46 | 14    |
| 5  | 558.34   | 279.67 |    |      | 540.33   | 270.67 | A   | 1,646.89 | 823.95 | 1,629.86 | 815.43 | 1,628.88 | 814.94 | 13    |
| 6  | 671.42   | 336.21 |    |      | 653.41   | 327.21 | I   | 1,575.85 | 788.43 | 1,558.82 | 779.92 | 1,557.84 | 779.42 | 12    |
| 7  | 784.50   | 392.76 |    |      | 766.49   | 383.75 | L   | 1,462.77 | 731.89 | 1,445.74 | 723.37 | 1,444.76 | 722.88 | 11    |
| 8  | 913.55   | 457.28 |    |      | 895.54   | 448.27 | E   | 1,349.68 | 675.34 | 1,332.66 | 666.83 | 1,331.67 | 666.34 | 10    |
| 9  | 1,050.61 | 525.81 |    |      | 1,032.60 | 516.80 | H   | 1,220.64 | 610.82 | 1,203.61 | 602.31 | 1,202.63 | 601.82 | 9     |
| 10 | 1,137.64 | 569.32 |    |      | 1,119.63 | 560.32 | S   | 1,083.58 | 542.29 | 1,066.55 | 533.78 | 1,065.57 | 533.29 | 8     |
| 11 | 1,250.72 | 625.86 |    |      | 1,232.71 | 616.86 | L   | 996.55   | 498.78 | 979.52   | 490.26 | 978.54   | 489.77 | 7     |
| 12 | 1,397.79 | 699.40 |    |      | 1,379.78 | 690.39 | F   | 883.46   | 442.24 | 866.44   | 433.72 | 865.45   | 433.23 | 6     |
| 13 | 1,484.82 | 742.92 |    |      | 1,466.81 | 733.91 | S   | 736.40   | 368.70 | 719.37   | 360.19 | 718.39   | 359.70 | 5     |
| 14 | 1,585.87 | 793.44 |    |      | 1,567.86 | 784.43 | T   | 649.36   | 325.19 | 632.34   | 316.67 | 631.35   | 316.18 | 4     |

|    |          |        |          |        |          |        |   |        |        |        |        |        |        |   |
|----|----------|--------|----------|--------|----------|--------|---|--------|--------|--------|--------|--------|--------|---|
| 15 | 1,714.91 | 857.96 |          |        | 1,696.90 | 848.96 | E | 548.32 | 274.66 | 531.29 | 266.15 | 530.31 | 265.66 | 3 |
| 16 | 1,842.97 | 921.99 | 1,825.95 | 913.48 | 1,824.96 | 912.98 | Q | 419.27 | 210.14 | 402.25 | 201.63 |        |        | 2 |
| 17 |          |        |          |        |          |        | K | 291.21 | 146.11 | 274.19 | 137.60 |        |        | 1 |

Query 36723 Hit 1

MS/MS Fragmentation of **IIADIFEYTAK**

Found in **sp|P22033|MUTA\_HUMAN**, Methylmalonyl-CoA mutase

Match to Query 36723: 1570.884from(786.4494,2+)

Title: 938: Scan 2099 (rt=56.6345, f=3, i=318) [D:\lab212\membrane\Grace\Joyce\iTRAQ\_28\_1\_327.raw]

Data File: Submitted from 20120508-1(merge) by Mascot Daemon on JOYCE-VAIO

Monoisotopic mass of neutral peptide Mr(calc): 1570.884

Variable modifications:

K11 iTRAQ4plex (K)

Ions Score: 66.41 Expect: 0.000

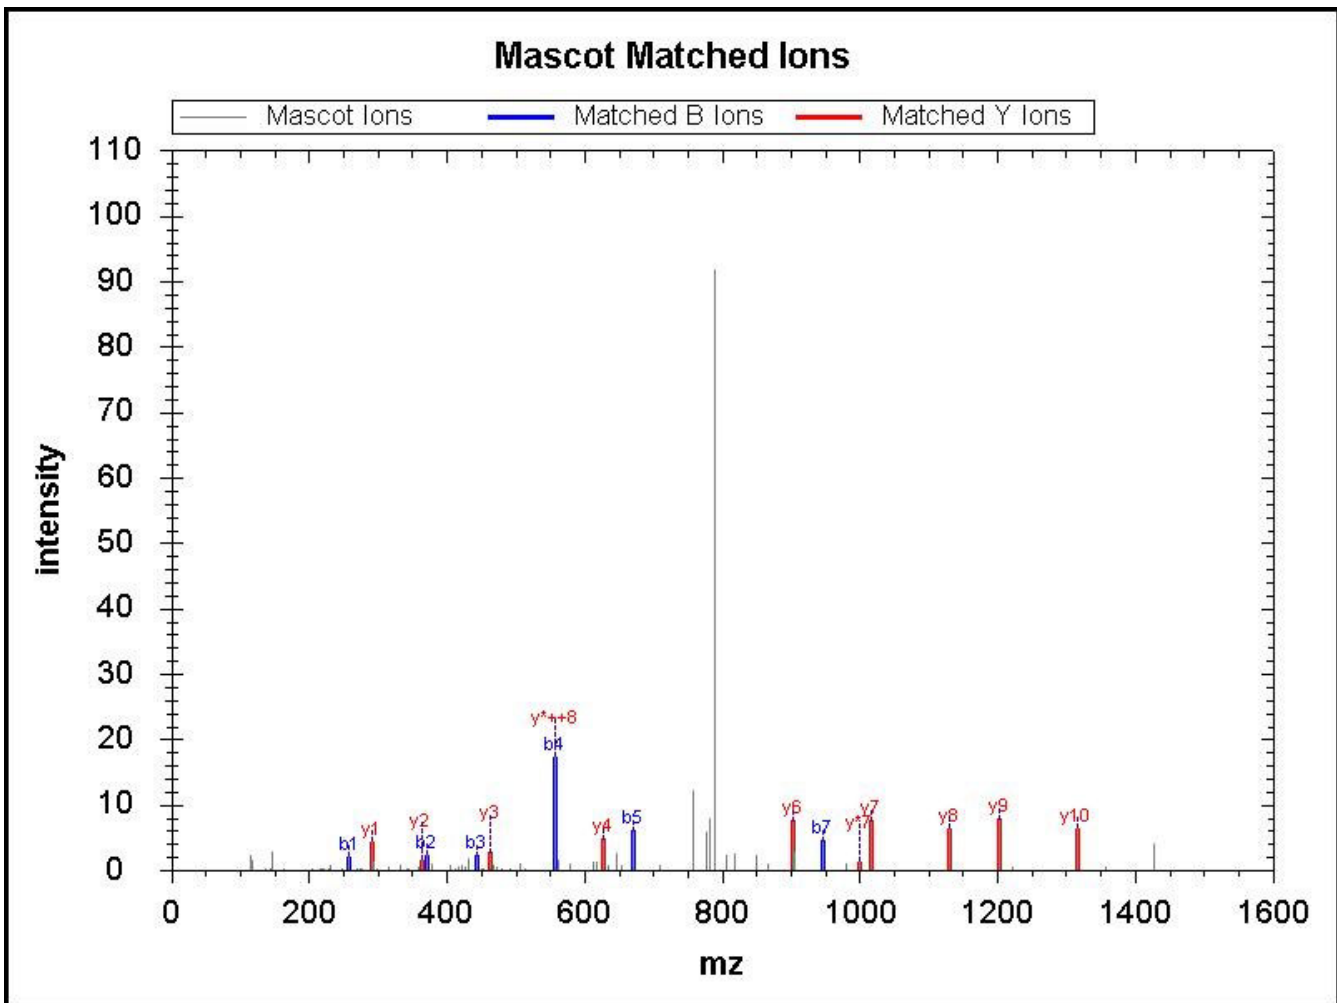

| No | b        | b++    | b0       | b0++   | Seq | y        | y++    | y*       | y*++   | y0       | y0++   | RevNo |
|----|----------|--------|----------|--------|-----|----------|--------|----------|--------|----------|--------|-------|
| 1  | 258.19   | 129.60 |          |        | I   |          |        |          |        |          |        | 11    |
| 2  | 371.28   | 186.14 |          |        | I   | 1,314.71 | 657.86 | 1,297.68 | 649.34 | 1,296.70 | 648.85 | 10    |
| 3  | 442.31   | 221.66 |          |        | A   | 1,201.62 | 601.31 | 1,184.60 | 592.80 | 1,183.61 | 592.31 | 9     |
| 4  | 557.34   | 279.17 | 539.33   | 270.17 | D   | 1,130.58 | 565.80 | 1,113.56 | 557.28 | 1,112.57 | 556.79 | 8     |
| 5  | 670.43   | 335.72 | 652.41   | 326.71 | I   | 1,015.56 | 508.28 | 998.53   | 499.77 | 997.55   | 499.28 | 7     |
| 6  | 817.49   | 409.25 | 799.48   | 400.25 | F   | 902.47   | 451.74 | 885.45   | 443.23 | 884.46   | 442.74 | 6     |
| 7  | 946.54   | 473.77 | 928.53   | 464.77 | E   | 755.41   | 378.21 | 738.38   | 369.69 | 737.39   | 369.20 | 5     |
| 8  | 1,109.60 | 555.30 | 1,091.59 | 546.30 | Y   | 626.36   | 313.69 | 609.34   | 305.17 | 608.35   | 304.68 | 4     |
| 9  | 1,210.65 | 605.83 | 1,192.64 | 596.82 | T   | 463.30   | 232.15 | 446.27   | 223.64 | 445.29   | 223.15 | 3     |
| 10 | 1,281.68 | 641.35 | 1,263.67 | 632.34 | A   | 362.25   | 181.63 | 345.23   | 173.12 |          |        | 2     |

Query 87153 Hit 1

MS/MS Fragmentation of **HLAGYEQQDAHEFLIAALDVLHR**

Found in **sp|Q9UPT9|UBP22\_HUMAN**, Ubiquitin carboxyl-terminal hydrolase 22 OS=Homo sapiens GN=USP22 PE=1 SV=2

Match to Query 87153: 2789.443from(698.368,4+)

Title: 1039: Scan 2214 (rt=59.5665, f=3, i=349) [D:\lab212\membrane\Grace\Joyce\iTRAQ\_50\_2.raw]

Data File: Submitted from 20120508-1(merge) by Mascot Daemon on JOYCE-VAIO

Monoisotopic mass of neutral peptide Mr(calc): 2789.443

Variable modifications:

Ions Score: 66.23 Expect: 0.000

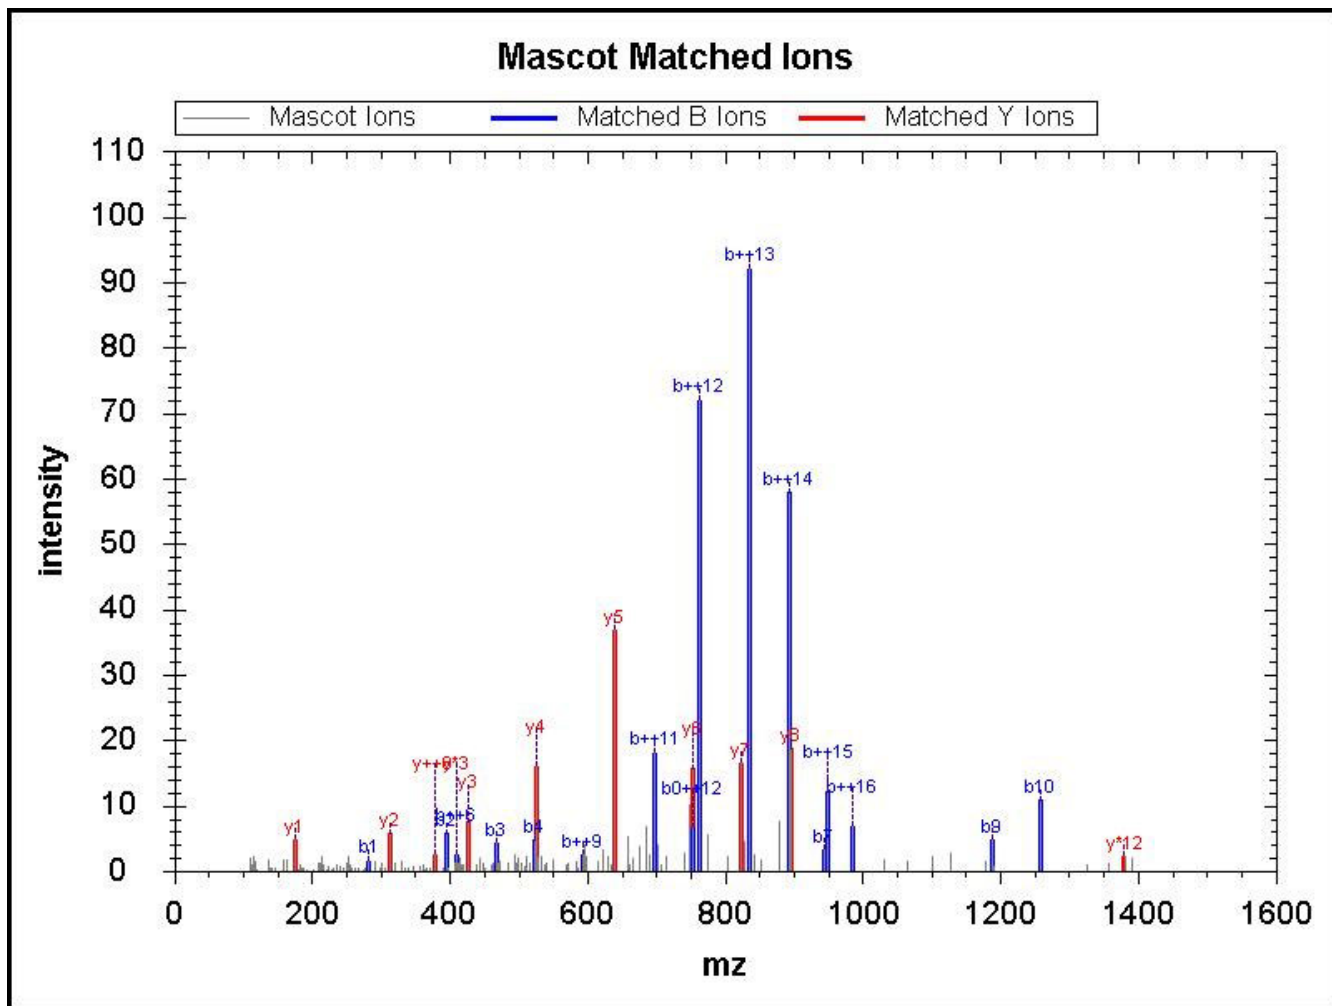

| No | b        | b++    | b*       | b*++   | b0       | b0++   | Seq | y        | y++      | y*       | y*++     | y0       | y0++     | RevNo |
|----|----------|--------|----------|--------|----------|--------|-----|----------|----------|----------|----------|----------|----------|-------|
| 1  | 282.17   | 141.59 |          |        |          |        | H   |          |          |          |          |          |          | 23    |
| 2  | 395.25   | 198.13 |          |        |          |        | L   | 2,509.28 | 1,255.15 | 2,492.26 | 1,246.63 | 2,491.27 | 1,246.14 | 22    |
| 3  | 466.29   | 233.65 |          |        |          |        | A   | 2,396.20 | 1,198.60 | 2,379.17 | 1,190.09 | 2,378.19 | 1,189.60 | 21    |
| 4  | 523.31   | 262.16 |          |        |          |        | G   | 2,325.16 | 1,163.08 | 2,308.14 | 1,154.57 | 2,307.15 | 1,154.08 | 20    |
| 5  | 686.37   | 343.69 |          |        |          |        | Y   | 2,268.14 | 1,134.57 | 2,251.11 | 1,126.06 | 2,250.13 | 1,125.57 | 19    |
| 6  | 815.42   | 408.21 |          |        | 797.41   | 399.21 | E   | 2,105.08 | 1,053.04 | 2,088.05 | 1,044.53 | 2,087.07 | 1,044.04 | 18    |
| 7  | 943.48   | 472.24 | 926.45   | 463.73 | 925.46   | 463.24 | Q   | 1,976.03 | 988.52   | 1,959.01 | 980.01   | 1,958.02 | 979.52   | 17    |
| 8  | 1,071.53 | 536.27 | 1,054.51 | 527.76 | 1,053.52 | 527.27 | Q   | 1,847.98 | 924.49   | 1,830.95 | 915.98   | 1,829.97 | 915.49   | 16    |
| 9  | 1,186.56 | 593.78 | 1,169.53 | 585.27 | 1,168.55 | 584.78 | D   | 1,719.92 | 860.46   | 1,702.89 | 851.95   | 1,701.91 | 851.46   | 15    |
| 10 | 1,257.60 | 629.30 | 1,240.57 | 620.79 | 1,239.59 | 620.30 | A   | 1,604.89 | 802.95   | 1,587.86 | 794.44   | 1,586.88 | 793.94   | 14    |
| 11 | 1,394.66 | 697.83 | 1,377.63 | 689.32 | 1,376.65 | 688.83 | H   | 1,533.85 | 767.43   | 1,516.83 | 758.92   | 1,515.84 | 758.43   | 13    |
| 12 | 1,523.70 | 762.35 | 1,506.67 | 753.84 | 1,505.69 | 753.35 | E   | 1,396.79 | 698.90   | 1,379.77 | 690.39   | 1,378.78 | 689.90   | 12    |
| 13 | 1,670.77 | 835.89 | 1,653.74 | 827.37 | 1,652.76 | 826.88 | F   | 1,267.75 | 634.38   | 1,250.73 | 625.87   | 1,249.74 | 625.37   | 11    |
| 14 | 1,783.85 | 892.43 | 1,766.83 | 883.92 | 1,765.84 | 883.42 | L   | 1,120.68 | 560.85   | 1,103.66 | 552.33   | 1,102.67 | 551.84   | 10    |

|    |          |          |          |          |          |          |   |          |        |        |        |        |        |   |
|----|----------|----------|----------|----------|----------|----------|---|----------|--------|--------|--------|--------|--------|---|
| 15 | 1,896.94 | 948.97   | 1,879.91 | 940.46   | 1,878.93 | 939.97   | I | 1,007.60 | 504.30 | 990.57 | 495.79 | 989.59 | 495.30 | 9 |
| 16 | 1,967.97 | 984.49   | 1,950.95 | 975.98   | 1,949.96 | 975.49   | A | 894.52   | 447.76 | 877.49 | 439.25 | 876.50 | 438.76 | 8 |
| 17 | 2,039.01 | 1,020.01 | 2,021.98 | 1,011.50 | 2,021.00 | 1,011.00 | A | 823.48   | 412.24 | 806.45 | 403.73 | 805.47 | 403.24 | 7 |
| 18 | 2,152.09 | 1,076.55 | 2,135.07 | 1,068.04 | 2,134.08 | 1,067.55 | L | 752.44   | 376.72 | 735.41 | 368.21 | 734.43 | 367.72 | 6 |
| 19 | 2,267.12 | 1,134.06 | 2,250.09 | 1,125.55 | 2,249.11 | 1,125.06 | D | 639.36   | 320.18 | 622.33 | 311.67 | 621.35 | 311.18 | 5 |
| 20 | 2,366.19 | 1,183.60 | 2,349.16 | 1,175.09 | 2,348.18 | 1,174.59 | V | 524.33   | 262.67 | 507.30 | 254.16 |        |        | 4 |
| 21 | 2,479.27 | 1,240.14 | 2,462.25 | 1,231.63 | 2,461.26 | 1,231.14 | L | 425.26   | 213.13 | 408.24 | 204.62 |        |        | 3 |
| 22 | 2,616.33 | 1,308.67 | 2,599.31 | 1,300.16 | 2,598.32 | 1,299.66 | H | 312.18   | 156.59 | 295.15 | 148.08 |        |        | 2 |
| 23 |          |          |          |          |          |          | R | 175.12   | 88.06  | 158.09 | 79.55  |        |        | 1 |

Query 76347 Hit 1

MS/MS Fragmentation of **QLAENLVVIGGTSMLPGFLHR**

Found in **sp|Q9NZ32|ARP10\_HUMAN**, Actin-related protein 10 OS=Homo sapiens GN=ACTR10 PE=1 SV=1

Match to Query 76347: 2395.311 from(799.4443,3+)

Title: 998: Sum of 2 scans in range 2213 (rt=59.216, f=4, i=669) to 2214 (rt=59.2414, f=4, i=670)

[D:\lab212\membrane\GraceJoyce\iTRAQ\_31\_2.raw]

Data File: Submitted from 20120508-1(merge) by Mascot Daemon on JOYCE-VAIO

Monoisotopic mass of neutral peptide Mr(calc): 2395.311

Variable modifications:

Ions Score: 66.1 Expect: 0.000

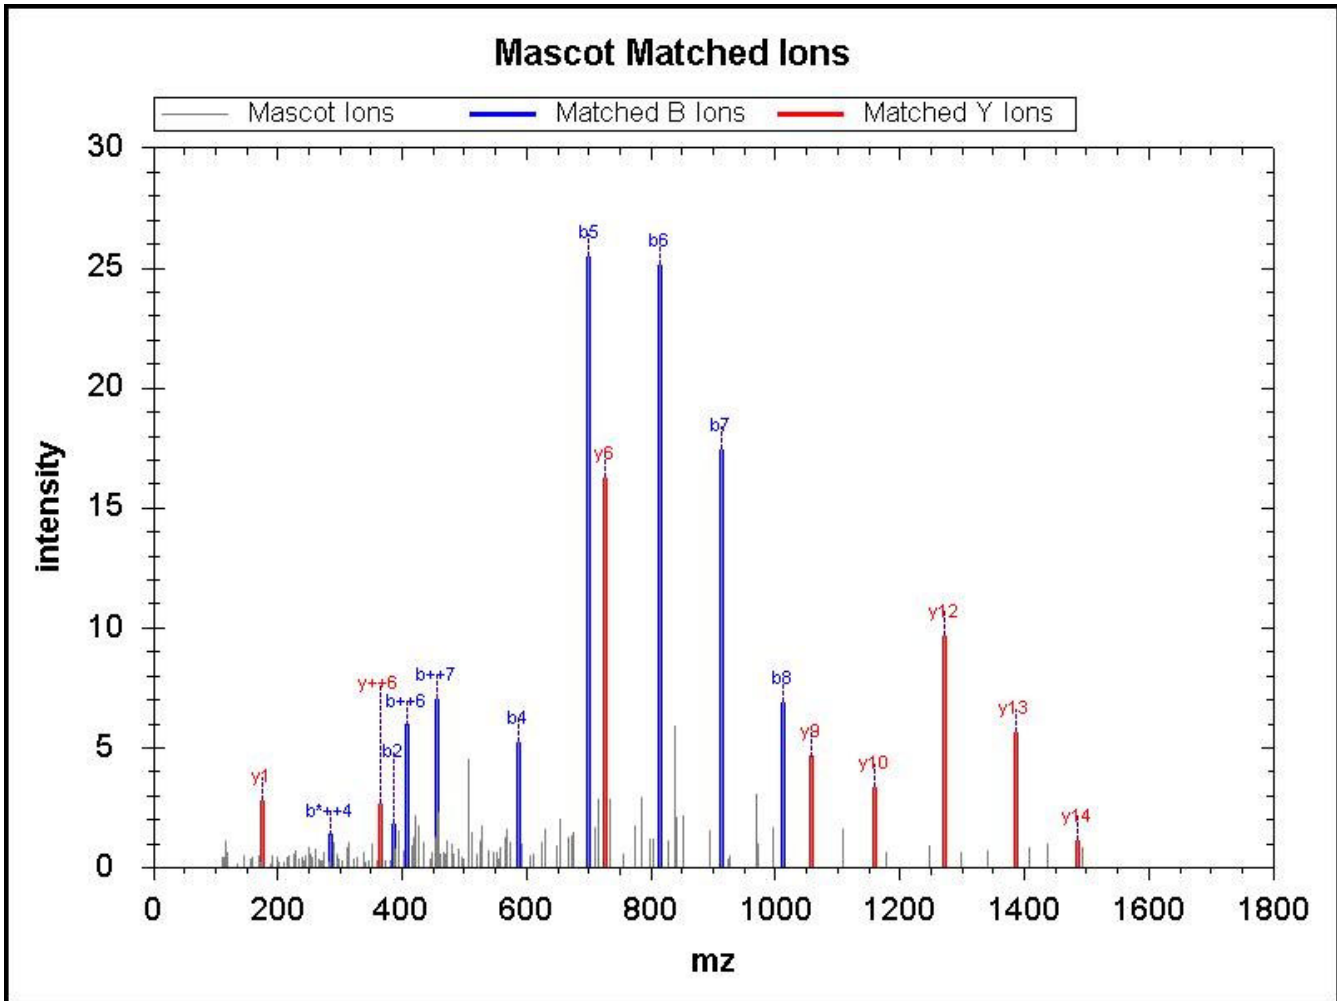

| No | b      | b++    | b*     | b*++   | b0     | b0++   | Seq | y        | y++      | y*       | y*++     | y0       | y0++     | RevNo |
|----|--------|--------|--------|--------|--------|--------|-----|----------|----------|----------|----------|----------|----------|-------|
| 1  | 273.17 | 137.09 | 256.14 | 128.57 |        |        | Q   |          |          |          |          |          |          | 21    |
| 2  | 386.25 | 193.63 | 369.23 | 185.12 |        |        | L   | 2,124.16 | 1,062.59 | 2,107.14 | 1,054.07 | 2,106.15 | 1,053.58 | 20    |
| 3  | 457.29 | 229.15 | 440.26 | 220.63 |        |        | A   | 2,011.08 | 1,006.04 | 1,994.05 | 997.53   | 1,993.07 | 997.04   | 19    |
| 4  | 586.33 | 293.67 | 569.31 | 285.16 | 568.32 | 284.66 | E   | 1,940.04 | 970.52   | 1,923.02 | 962.01   | 1,922.03 | 961.52   | 18    |
| 5  | 700.37 | 350.69 | 683.35 | 342.18 | 682.36 | 341.69 | N   | 1,811.00 | 906.00   | 1,793.97 | 897.49   | 1,792.99 | 897.00   | 17    |

|    |          |          |          |          |          |          |   |          |        |          |        |          |        |    |
|----|----------|----------|----------|----------|----------|----------|---|----------|--------|----------|--------|----------|--------|----|
| 6  | 813.46   | 407.23   | 796.43   | 398.72   | 795.45   | 398.23   | L | 1,696.96 | 848.98 | 1,679.93 | 840.47 | 1,678.95 | 839.98 | 16 |
| 7  | 912.53   | 456.77   | 895.50   | 448.25   | 894.52   | 447.76   | V | 1,583.87 | 792.44 | 1,566.85 | 783.93 | 1,565.86 | 783.43 | 15 |
| 8  | 1,011.60 | 506.30   | 994.57   | 497.79   | 993.58   | 497.30   | V | 1,484.80 | 742.91 | 1,467.78 | 734.39 | 1,466.79 | 733.90 | 14 |
| 9  | 1,124.68 | 562.84   | 1,107.65 | 554.33   | 1,106.67 | 553.84   | I | 1,385.74 | 693.37 | 1,368.71 | 684.86 | 1,367.73 | 684.37 | 13 |
| 10 | 1,181.70 | 591.35   | 1,164.67 | 582.84   | 1,163.69 | 582.35   | G | 1,272.65 | 636.83 | 1,255.63 | 628.32 | 1,254.64 | 627.82 | 12 |
| 11 | 1,238.72 | 619.86   | 1,221.70 | 611.35   | 1,220.71 | 610.86   | G | 1,215.63 | 608.32 | 1,198.60 | 599.81 | 1,197.62 | 599.31 | 11 |
| 12 | 1,339.77 | 670.39   | 1,322.74 | 661.88   | 1,321.76 | 661.38   | T | 1,158.61 | 579.81 | 1,141.58 | 571.29 | 1,140.60 | 570.80 | 10 |
| 13 | 1,426.80 | 713.90   | 1,409.78 | 705.39   | 1,408.79 | 704.90   | S | 1,057.56 | 529.28 | 1,040.53 | 520.77 | 1,039.55 | 520.28 | 9  |
| 14 | 1,557.84 | 779.43   | 1,540.82 | 770.91   | 1,539.83 | 770.42   | M | 970.53   | 485.77 | 953.50   | 477.25 |          |        | 8  |
| 15 | 1,670.93 | 835.97   | 1,653.90 | 827.45   | 1,652.92 | 826.96   | L | 839.49   | 420.25 | 822.46   | 411.73 |          |        | 7  |
| 16 | 1,767.98 | 884.49   | 1,750.95 | 875.98   | 1,749.97 | 875.49   | P | 726.40   | 363.71 | 709.38   | 355.19 |          |        | 6  |
| 17 | 1,825.00 | 913.00   | 1,807.97 | 904.49   | 1,806.99 | 904.00   | G | 629.35   | 315.18 | 612.33   | 306.67 |          |        | 5  |
| 18 | 1,972.07 | 986.54   | 1,955.04 | 978.03   | 1,954.06 | 977.53   | F | 572.33   | 286.67 | 555.30   | 278.16 |          |        | 4  |
| 19 | 2,085.15 | 1,043.08 | 2,068.13 | 1,034.57 | 2,067.14 | 1,034.08 | L | 425.26   | 213.13 | 408.24   | 204.62 |          |        | 3  |
| 20 | 2,222.21 | 1,111.61 | 2,205.19 | 1,103.10 | 2,204.20 | 1,102.60 | H | 312.18   | 156.59 | 295.15   | 148.08 |          |        | 2  |
| 21 |          |          |          |          |          |          | R | 175.12   | 88.06  | 158.09   | 79.55  |          |        | 1  |

Query 19052 Hit 1

MS/MS Fragmentation of **MDAEHPELR**

Found in **sp|Q12765|SCRN1\_HUMAN**, Secernin-1 OS=Homo sapiens GN=SCRN1 PE=1 SV=2

Match to Query 19052: 1240.515 from (414.5121, 3+)

Title: 211: Sum of 2 scans in range 500 (rt=21.0105, f=4, i=141) to 501 (rt=21.0359, f=4, i=142)

[D:\lab212\membrane\Grace\Joyce\iTRAQ40.raw]

Data File: Submitted from 20120508-1(merge) by Mascot Daemon on JOYCE-VAIO

Monoisotopic mass of neutral peptide Mr(calc): 1240.515

Variable modifications:

Ions Score: 65.93 Expect: 0.000

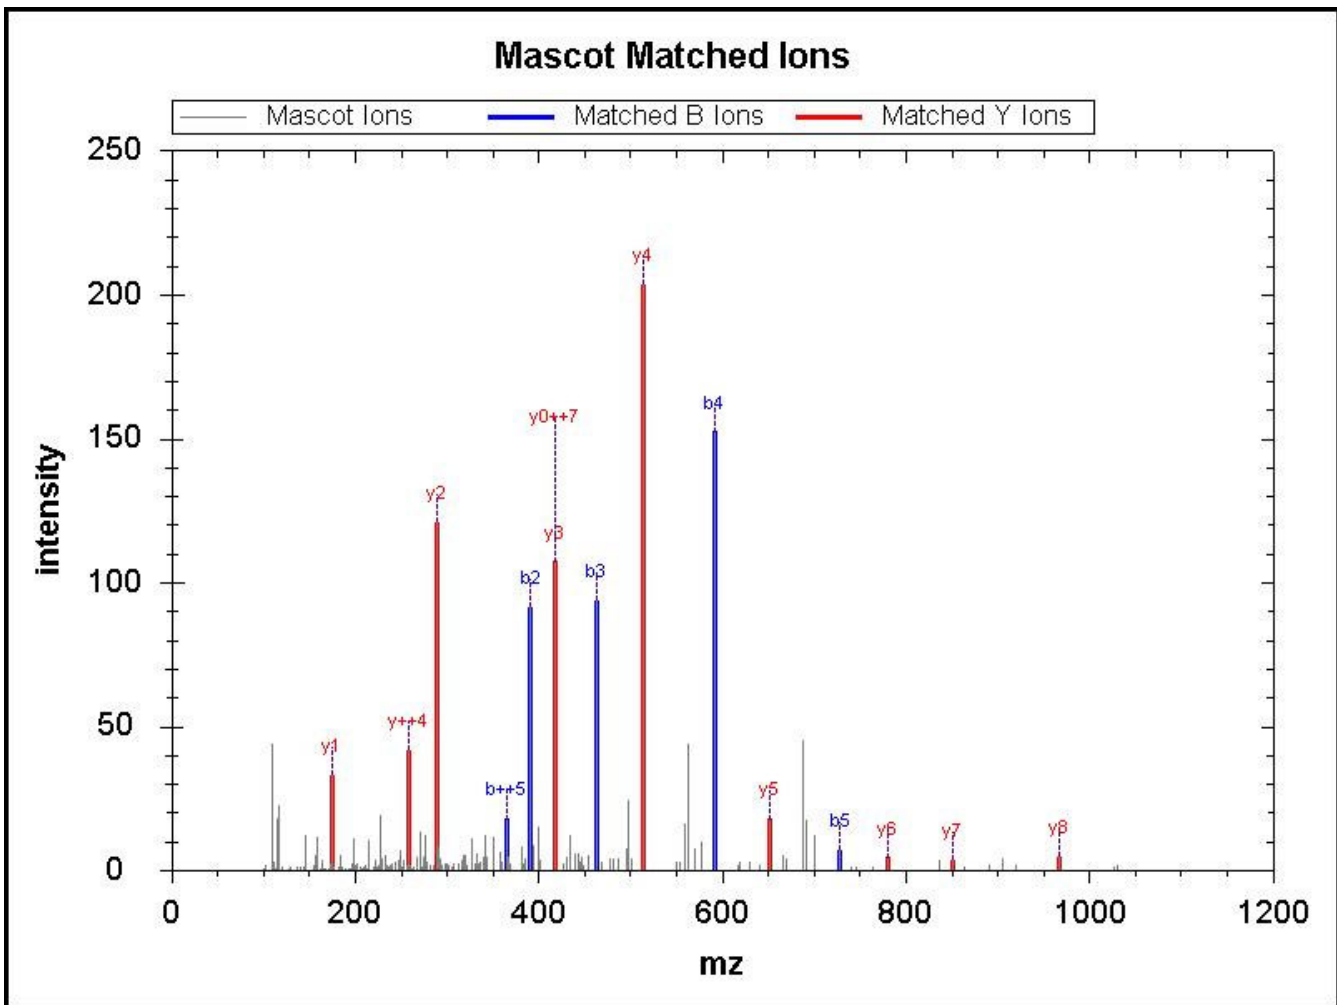

| No | b        | b++    | b0       | b0++   | Seq | y      | y++    | y*     | y*++   | y0     | y0++   | RevNo |
|----|----------|--------|----------|--------|-----|--------|--------|--------|--------|--------|--------|-------|
| 1  | 276.15   | 138.58 |          |        | M   |        |        |        |        |        |        | 9     |
| 2  | 391.18   | 196.09 | 373.17   | 187.09 | D   | 966.46 | 483.74 | 949.44 | 475.22 | 948.45 | 474.73 | 8     |
| 3  | 462.21   | 231.61 | 444.20   | 222.61 | A   | 851.44 | 426.22 | 834.41 | 417.71 | 833.43 | 417.22 | 7     |
| 4  | 591.26   | 296.13 | 573.25   | 287.13 | E   | 780.40 | 390.70 | 763.37 | 382.19 | 762.39 | 381.70 | 6     |
| 5  | 728.32   | 364.66 | 710.30   | 355.66 | H   | 651.36 | 326.18 | 634.33 | 317.67 | 633.35 | 317.18 | 5     |
| 6  | 825.37   | 413.19 | 807.36   | 404.18 | P   | 514.30 | 257.65 | 497.27 | 249.14 | 496.29 | 248.65 | 4     |
| 7  | 954.41   | 477.71 | 936.40   | 468.70 | E   | 417.25 | 209.13 | 400.22 | 200.61 | 399.24 | 200.12 | 3     |
| 8  | 1,067.49 | 534.25 | 1,049.48 | 525.25 | L   | 288.20 | 144.61 | 271.18 | 136.09 |        |        | 2     |
| 9  |          |        |          |        | R   | 175.12 | 88.06  | 158.09 | 79.55  |        |        | 1     |

Query 56590 Hit 1

MS/MS Fragmentation of **AHEGEIEDLALGPDGK**

Found in **sp|Q9HCU5|PREB\_HUMAN**, Prolactin regulatory element-binding protein OS=Homo sapiens GN=PREB PE=1 SV=2

Match to Query 56590: 1937.996from(647.0059,3+)

Title: 474: Sum of 2 scans in range 1072 (rt=33.9237, f=4, i=328) to 1073 (rt=33.9491, f=4, i=329)

[D:\lab212\membrane\GraceJoyce\iTRAQ\_42\_2.raw]

Data File: Submitted from 20120508-1(merge) by Mascot Daemon on JOYCE-VAIO

Monoisotopic mass of neutral peptide Mr(calc): 1937.996

Variable modifications:

K16 iTRAQ4plex (K)

Ions Score: 65.86 Expect: 0.000



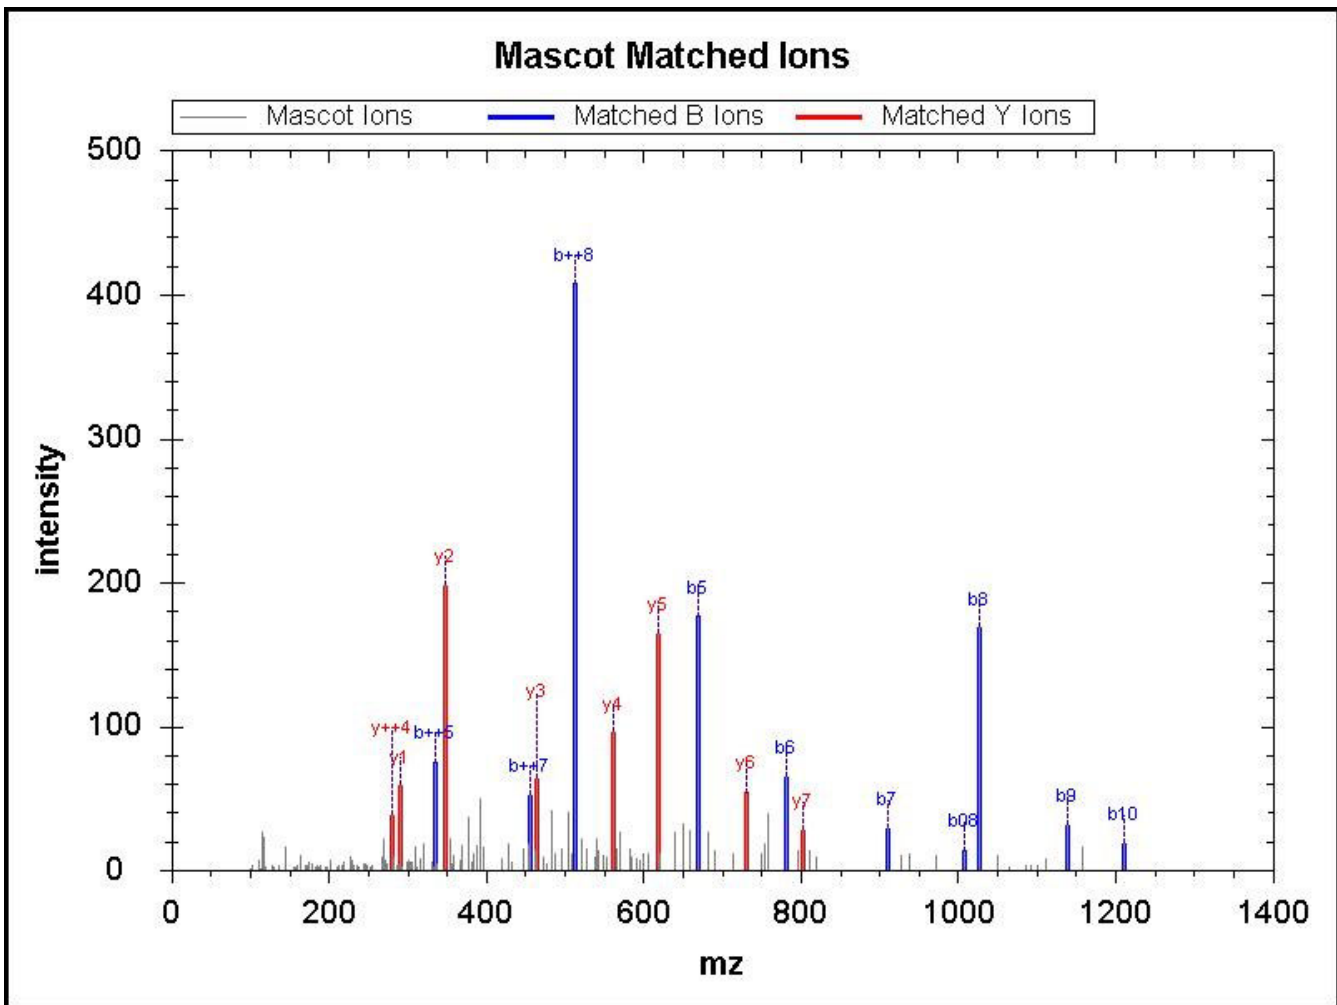

| No | b        | b++    | b0       | b0++   | Seq | y        | y++    | y*       | y*++   | y0       | y0++   | RevNo |
|----|----------|--------|----------|--------|-----|----------|--------|----------|--------|----------|--------|-------|
| 1  | 216.15   | 108.58 |          |        | A   |          |        |          |        |          |        | 16    |
| 2  | 353.21   | 177.11 |          |        | H   | 1,723.86 | 862.43 | 1,706.84 | 853.92 | 1,705.85 | 853.43 | 15    |
| 3  | 482.25   | 241.63 | 464.24   | 232.62 | E   | 1,586.80 | 793.91 | 1,569.78 | 785.39 | 1,568.79 | 784.90 | 14    |
| 4  | 539.27   | 270.14 | 521.26   | 261.13 | G   | 1,457.76 | 729.38 | 1,440.73 | 720.87 | 1,439.75 | 720.38 | 13    |
| 5  | 668.31   | 334.66 | 650.30   | 325.65 | E   | 1,400.74 | 700.87 | 1,383.71 | 692.36 | 1,382.73 | 691.87 | 12    |
| 6  | 781.40   | 391.20 | 763.39   | 382.20 | I   | 1,271.70 | 636.35 | 1,254.67 | 627.84 | 1,253.69 | 627.35 | 11    |
| 7  | 910.44   | 455.72 | 892.43   | 446.72 | E   | 1,158.61 | 579.81 | 1,141.59 | 571.30 | 1,140.60 | 570.80 | 10    |
| 8  | 1,025.47 | 513.24 | 1,007.46 | 504.23 | D   | 1,029.57 | 515.29 | 1,012.54 | 506.78 | 1,011.56 | 506.28 | 9     |
| 9  | 1,138.55 | 569.78 | 1,120.54 | 560.77 | L   | 914.54   | 457.77 | 897.52   | 449.26 | 896.53   | 448.77 | 8     |
| 10 | 1,209.59 | 605.30 | 1,191.58 | 596.29 | A   | 801.46   | 401.23 | 784.43   | 392.72 | 783.45   | 392.23 | 7     |
| 11 | 1,322.67 | 661.84 | 1,304.66 | 652.83 | L   | 730.42   | 365.71 | 713.40   | 357.20 | 712.41   | 356.71 | 6     |
| 12 | 1,379.69 | 690.35 | 1,361.68 | 681.34 | G   | 617.34   | 309.17 | 600.31   | 300.66 | 599.33   | 300.17 | 5     |
| 13 | 1,476.75 | 738.88 | 1,458.73 | 729.87 | P   | 560.32   | 280.66 | 543.29   | 272.15 | 542.31   | 271.66 | 4     |
| 14 | 1,591.77 | 796.39 | 1,573.76 | 787.38 | D   | 463.26   | 232.14 | 446.24   | 223.62 | 445.25   | 223.13 | 3     |
| 15 | 1,648.79 | 824.90 | 1,630.78 | 815.90 | G   | 348.24   | 174.62 | 331.21   | 166.11 |          |        | 2     |
| 16 |          |        |          |        | K   | 291.21   | 146.11 | 274.19   | 137.60 |          |        | 1     |

Query 85971 Hit 1

MS/MS Fragmentation of **ITHEVDEL TQIIADVSQDPTLPR**

Found in **sp|P36954|RPB9\_HUMAN**, DNA-directed RNA polymerase II subunit RPB9 OS=Homo sapiens GN=POLR2I PE=1 SV=1

Match to Query 85971: 2733.428from(912.15,3+)

Title: 1128: Scan 2499 (rt=65.683, f=2, i=401) [D:\lab212\membrane\Grace\Joyce\iTRAQ\_32\_2.raw]

Data File: Submitted from 20120508-1(merge) by Mascot Daemon on JOYCE-VAIO

Monoisotopic mass of neutral peptide Mr(calc): 2733.428

Variable modifications:

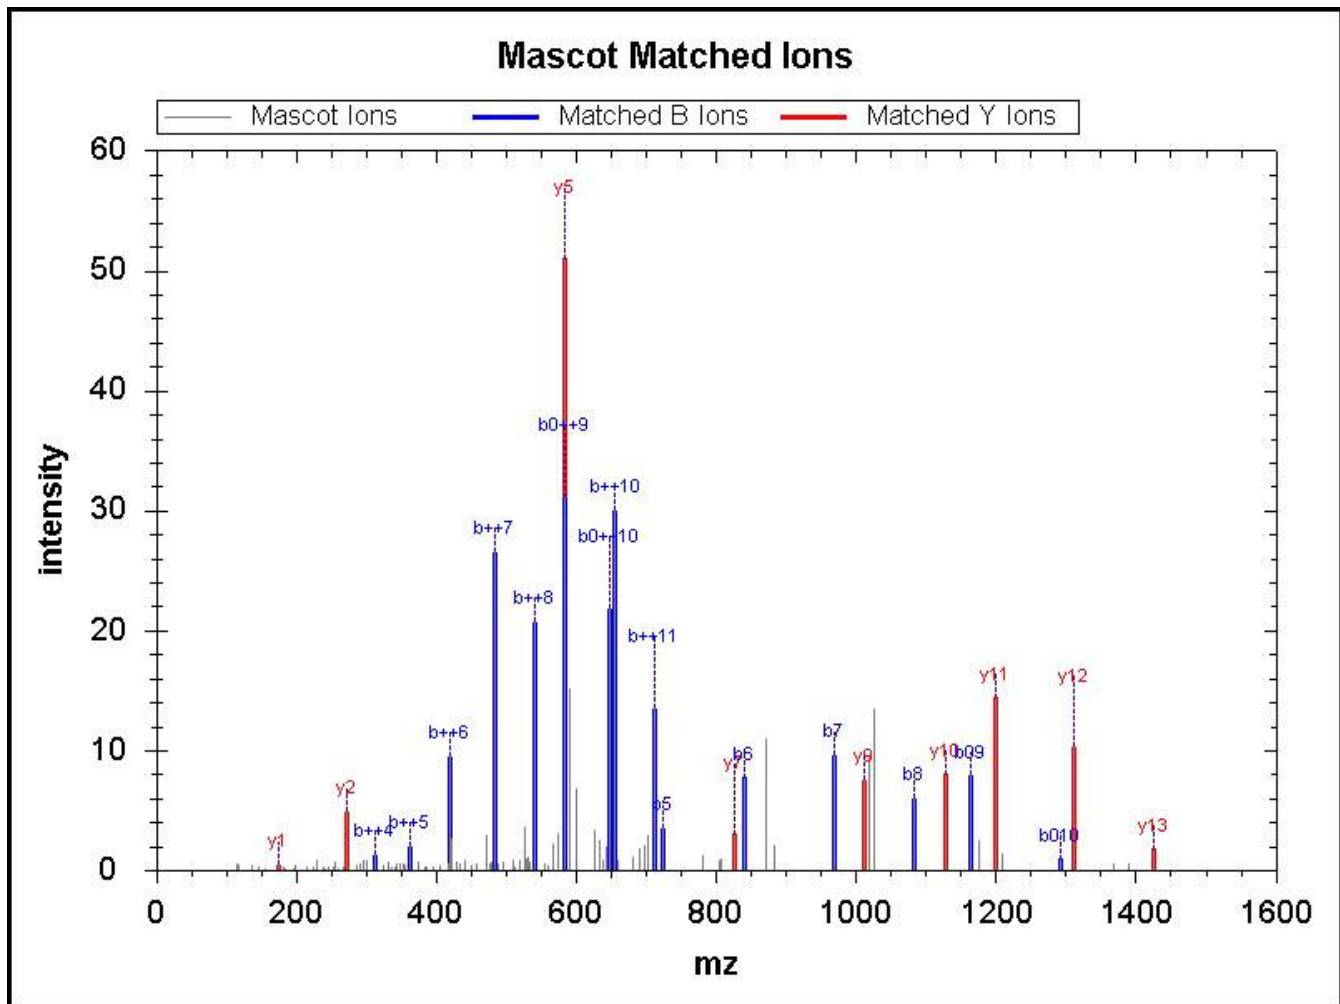

| No | b        | b++      | b*       | b*++     | b0       | b0++     | Seq | y        | y++      | y*       | y*++     | y0       | y0++     | RevNo |
|----|----------|----------|----------|----------|----------|----------|-----|----------|----------|----------|----------|----------|----------|-------|
| 1  | 258.19   | 129.60   |          |          |          |          | I   |          |          |          |          |          |          | 23    |
| 2  | 359.24   | 180.12   |          |          | 341.23   | 171.12   | T   | 2,477.25 | 1,239.13 | 2,460.23 | 1,230.62 | 2,459.24 | 1,230.12 | 22    |
| 3  | 496.30   | 248.65   |          |          | 478.29   | 239.65   | H   | 2,376.20 | 1,188.61 | 2,359.18 | 1,180.09 | 2,358.19 | 1,179.60 | 21    |
| 4  | 625.34   | 313.17   |          |          | 607.33   | 304.17   | E   | 2,239.15 | 1,120.08 | 2,222.12 | 1,111.56 | 2,221.13 | 1,111.07 | 20    |
| 5  | 724.41   | 362.71   |          |          | 706.40   | 353.70   | V   | 2,110.10 | 1,055.56 | 2,093.08 | 1,047.04 | 2,092.09 | 1,046.55 | 19    |
| 6  | 839.44   | 420.22   |          |          | 821.43   | 411.22   | D   | 2,011.03 | 1,006.02 | 1,994.01 | 997.51   | 1,993.02 | 997.02   | 18    |
| 7  | 968.48   | 484.74   |          |          | 950.47   | 475.74   | E   | 1,896.01 | 948.51   | 1,878.98 | 939.99   | 1,878.00 | 939.50   | 17    |
| 8  | 1,081.56 | 541.29   |          |          | 1,063.55 | 532.28   | L   | 1,766.96 | 883.99   | 1,749.94 | 875.47   | 1,748.95 | 874.98   | 16    |
| 9  | 1,182.61 | 591.81   |          |          | 1,164.60 | 582.80   | T   | 1,653.88 | 827.44   | 1,636.85 | 818.93   | 1,635.87 | 818.44   | 15    |
| 10 | 1,310.67 | 655.84   | 1,293.64 | 647.33   | 1,292.66 | 646.83   | Q   | 1,552.83 | 776.92   | 1,535.81 | 768.41   | 1,534.82 | 767.91   | 14    |
| 11 | 1,423.76 | 712.38   | 1,406.73 | 703.87   | 1,405.74 | 703.38   | I   | 1,424.77 | 712.89   | 1,407.75 | 704.38   | 1,406.76 | 703.89   | 13    |
| 12 | 1,536.84 | 768.92   | 1,519.81 | 760.41   | 1,518.83 | 759.92   | I   | 1,311.69 | 656.35   | 1,294.66 | 647.84   | 1,293.68 | 647.34   | 12    |
| 13 | 1,607.88 | 804.44   | 1,590.85 | 795.93   | 1,589.87 | 795.44   | A   | 1,198.61 | 599.81   | 1,181.58 | 591.29   | 1,180.60 | 590.80   | 11    |
| 14 | 1,722.90 | 861.96   | 1,705.88 | 853.44   | 1,704.89 | 852.95   | D   | 1,127.57 | 564.29   | 1,110.54 | 555.77   | 1,109.56 | 555.28   | 10    |
| 15 | 1,821.97 | 911.49   | 1,804.95 | 902.98   | 1,803.96 | 902.48   | V   | 1,012.54 | 506.77   | 995.52   | 498.26   | 994.53   | 497.77   | 9     |
| 16 | 1,909.00 | 955.01   | 1,891.98 | 946.49   | 1,890.99 | 946.00   | S   | 913.47   | 457.24   | 896.45   | 448.73   | 895.46   | 448.24   | 8     |
| 17 | 2,037.06 | 1,019.03 | 2,020.04 | 1,010.52 | 2,019.05 | 1,010.03 | Q   | 826.44   | 413.72   | 809.42   | 405.21   | 808.43   | 404.72   | 7     |
| 18 | 2,152.09 | 1,076.55 | 2,135.06 | 1,068.03 | 2,134.08 | 1,067.54 | D   | 698.38   | 349.70   | 681.36   | 341.18   | 680.37   | 340.69   | 6     |
| 19 | 2,249.14 | 1,125.07 | 2,232.12 | 1,116.56 | 2,231.13 | 1,116.07 | P   | 583.36   | 292.18   | 566.33   | 283.67   | 565.35   | 283.18   | 5     |
| 20 | 2,350.19 | 1,175.60 | 2,333.16 | 1,167.09 | 2,332.18 | 1,166.59 | T   | 486.30   | 243.66   | 469.28   | 235.14   | 468.29   | 234.65   | 4     |
| 21 | 2,463.27 | 1,232.14 | 2,446.25 | 1,223.63 | 2,445.26 | 1,223.14 | L   | 385.26   | 193.13   | 368.23   | 184.62   |          |          | 3     |
| 22 | 2,560.33 | 1,280.67 | 2,543.30 | 1,272.15 | 2,542.32 | 1,271.66 | P   | 272.17   | 136.59   | 255.15   | 128.08   |          |          | 2     |

Query 55984 Hit 1

MS/MS Fragmentation of **ETSSDVALASHILTALR**

Found in [sp|O00273|DFFA\\_HUMAN](#), DNA fragmentation factor subunit alpha OS=Homo sapiens GN=DFFA PE=1 SV=1

Match to Query 55984: 1927.048from(643.3566,3+)

Title: 861: Scan 1928 (rt=52.852, f=3, i=296) [D:\lab212\membrane\Grace\Joyce\iTRAQ\_32\_2.raw]

Data File: Submitted from 20120508-1(merge) by Mascot Daemon on JOYCE-VAIO

Monoisotopic mass of neutral peptide Mr(calc): 1927.048

Variable modifications:

Ions Score: 64.71 Expect: 0.000

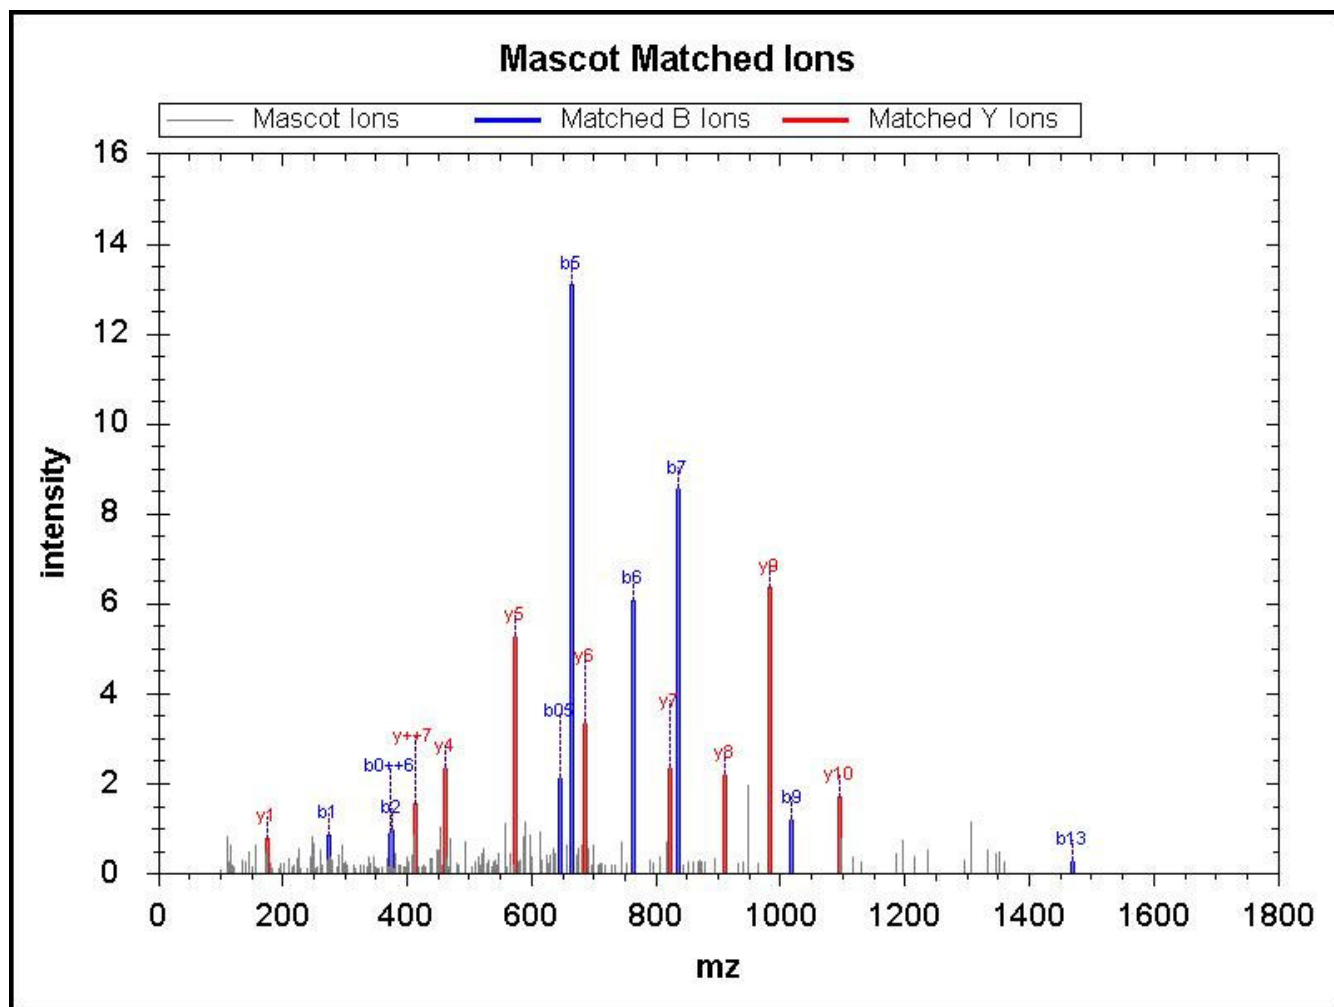

|    |          |        |          |        |   |        |        |        |        |  |  |   |
|----|----------|--------|----------|--------|---|--------|--------|--------|--------|--|--|---|
| 15 | 1,640.86 | 820.93 | 1,622.85 | 811.93 | A | 359.24 | 180.12 | 342.21 | 171.61 |  |  | 3 |
| 16 | 1,753.95 | 877.48 | 1,735.93 | 868.47 | L | 288.20 | 144.61 | 271.18 | 136.09 |  |  | 2 |
| 17 |          |        |          |        | R | 175.12 | 88.06  | 158.09 | 79.55  |  |  | 1 |

Query 56161 Hit 1

MS/MS Fragmentation of **WSLALGLPLPLGEHAGR**

Found in **sp|Q96F86|EDC3\_HUMAN**, Enhancer of mRNA-decapping protein 3 OS=Homo sapiens GN=EDC3 PE=1 SV=1

Match to Query 56161: 1930.088from(644.3699,3+)

Title: 990: Scan 2143 (rt=57.9495, f=3, i=333) [D:\lab212\membrane\Grace\Joyce\iTRAQ\_33\_2.raw]

Data File: Submitted from 20120508-1(merge) by Mascot Daemon on JOYCE-VAIO

Monoisotopic mass of neutral peptide Mr(calc): 1930.088

Variable modifications:

Ions Score: 64.57 Expect: 0.000

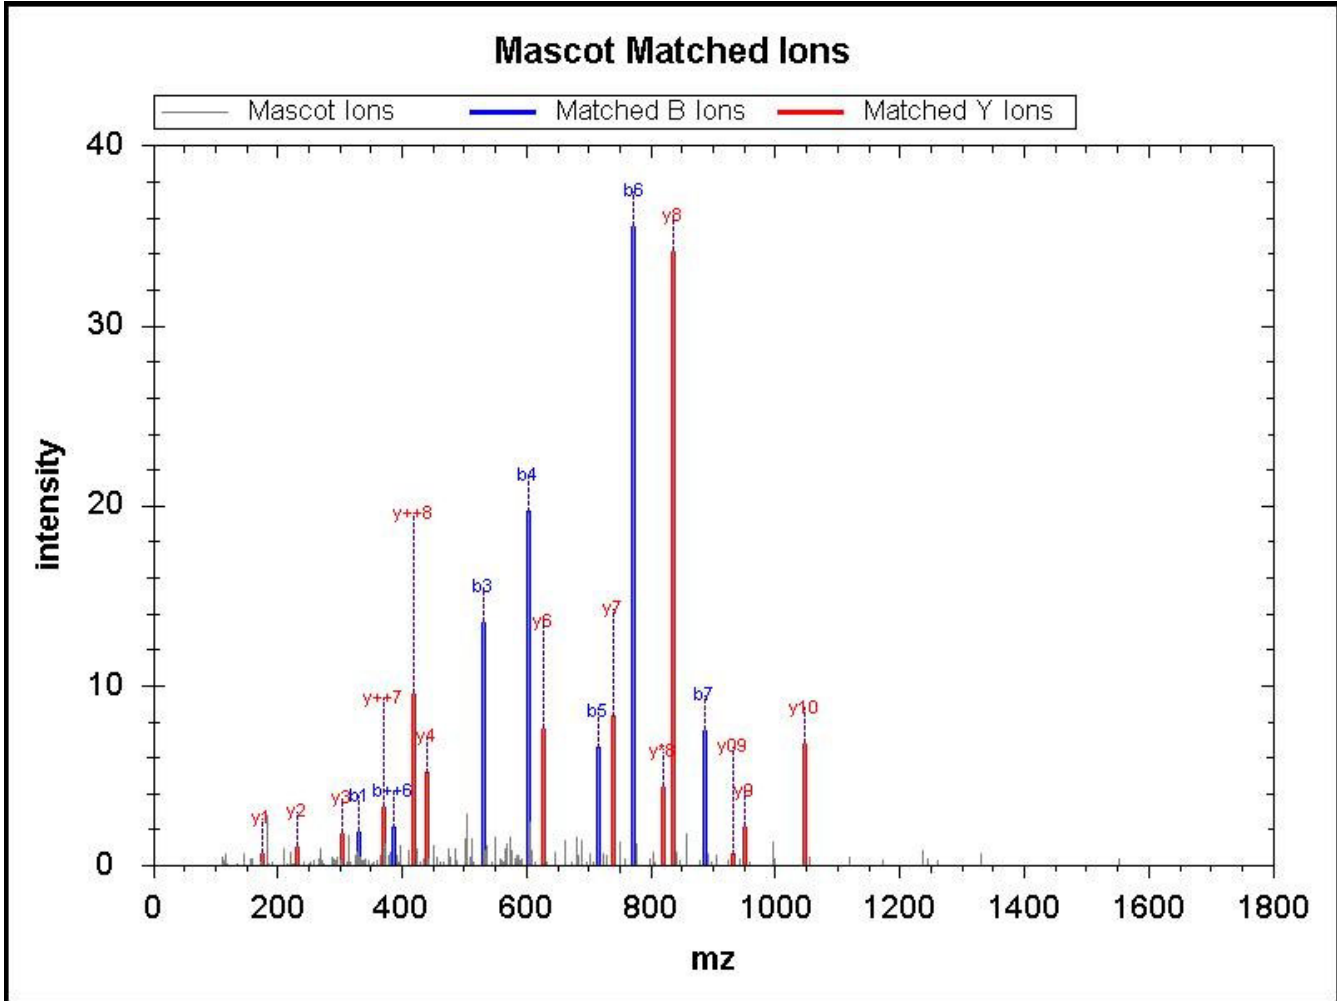

| No | b        | b++    | b0       | b0++   | Seq | y        | y++    | y*       | y*++   | y0       | y0++   | RevNo |
|----|----------|--------|----------|--------|-----|----------|--------|----------|--------|----------|--------|-------|
| 1  | 331.19   | 166.10 |          |        | W   |          |        |          |        |          |        | 17    |
| 2  | 418.22   | 209.61 | 400.21   | 200.61 | S   | 1,600.92 | 800.96 | 1,583.89 | 792.45 | 1,582.91 | 791.96 | 16    |
| 3  | 531.30   | 266.16 | 513.29   | 257.15 | L   | 1,513.89 | 757.45 | 1,496.86 | 748.93 | 1,495.87 | 748.44 | 15    |
| 4  | 602.34   | 301.67 | 584.33   | 292.67 | A   | 1,400.80 | 700.90 | 1,383.77 | 692.39 | 1,382.79 | 691.90 | 14    |
| 5  | 715.43   | 358.22 | 697.42   | 349.21 | L   | 1,329.76 | 665.39 | 1,312.74 | 656.87 | 1,311.75 | 656.38 | 13    |
| 6  | 772.45   | 386.73 | 754.44   | 377.72 | G   | 1,216.68 | 608.84 | 1,199.65 | 600.33 | 1,198.67 | 599.84 | 12    |
| 7  | 885.53   | 443.27 | 867.52   | 434.26 | L   | 1,159.66 | 580.33 | 1,142.63 | 571.82 | 1,141.65 | 571.33 | 11    |
| 8  | 982.58   | 491.80 | 964.57   | 482.79 | P   | 1,046.57 | 523.79 | 1,029.55 | 515.28 | 1,028.56 | 514.79 | 10    |
| 9  | 1,095.67 | 548.34 | 1,077.66 | 539.33 | L   | 949.52   | 475.26 | 932.49   | 466.75 | 931.51   | 466.26 | 9     |
| 10 | 1,192.72 | 596.86 | 1,174.71 | 587.86 | P   | 836.44   | 418.72 | 819.41   | 410.21 | 818.43   | 409.72 | 8     |
| 11 | 1,305.81 | 653.41 | 1,287.79 | 644.40 | L   | 739.38   | 370.20 | 722.36   | 361.68 | 721.37   | 361.19 | 7     |

|    |          |        |          |        |   |        |        |        |        |        |        |   |
|----|----------|--------|----------|--------|---|--------|--------|--------|--------|--------|--------|---|
| 12 | 1,362.83 | 681.92 | 1,344.82 | 672.91 | G | 626.30 | 313.65 | 609.27 | 305.14 | 608.29 | 304.65 | 6 |
| 13 | 1,491.87 | 746.44 | 1,473.86 | 737.43 | E | 569.28 | 285.14 | 552.25 | 276.63 | 551.27 | 276.14 | 5 |
| 14 | 1,628.93 | 814.97 | 1,610.92 | 805.96 | H | 440.24 | 220.62 | 423.21 | 212.11 |        |        | 4 |
| 15 | 1,699.97 | 850.49 | 1,681.95 | 841.48 | A | 303.18 | 152.09 | 286.15 | 143.58 |        |        | 3 |
| 16 | 1,756.99 | 879.00 | 1,738.98 | 869.99 | G | 232.14 | 116.57 | 215.11 | 108.06 |        |        | 2 |
| 17 |          |        |          |        | R | 175.12 | 88.06  | 158.09 | 79.55  |        |        | 1 |

Query 75173 Hit 1

MS/MS Fragmentation of **AYQIDTVINLNVPFVEIK**

Found in **sp|Q9UIJ7|KAD3\_HUMAN**, GTP:AMP phosphotransferase

Match to Query 75173: 2363.321 from(788.781,3+)

Title: 1055: Sum of 2 scans in range 2363 (rt=62.5901, f=4, i=703) to 2364 (rt=62.6155, f=4, i=704)

[D:\lab212\membrane\GraceJoyce\iTRAQ\_25\_2.raw]

Data File: Submitted from 20120508-1(merge) by Mascot Daemon on JOYCE-VAIO

Monoisotopic mass of neutral peptide Mr(calc): 2363.321

Variable modifications:

K18 :iTRAQ4plex (K)

Ions Score: 64.51 Expect: 0.000

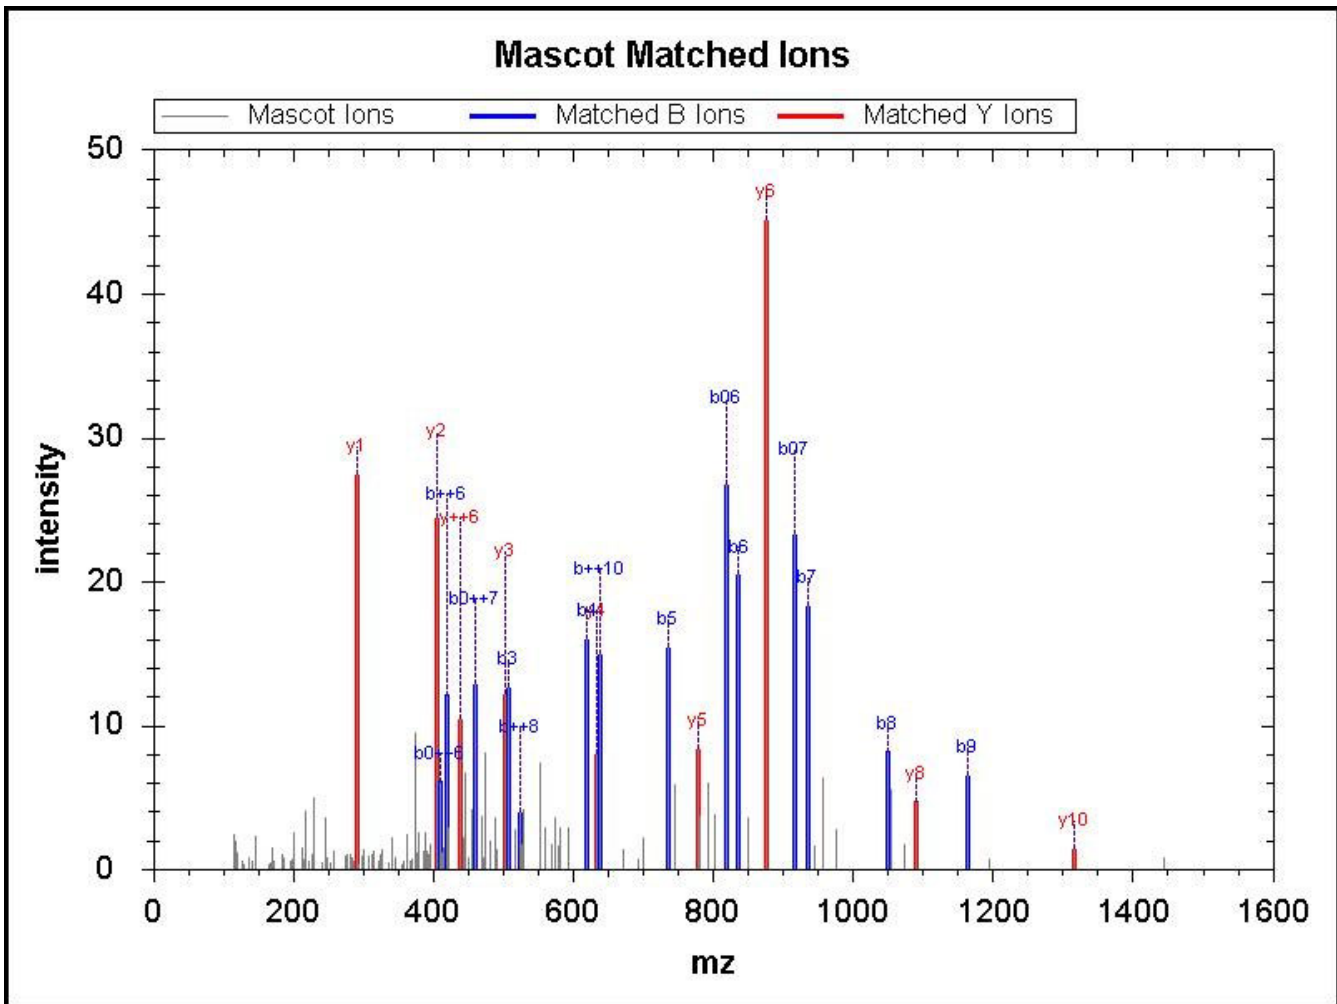

|    |          |          |          |          |          |          |   |          |        |          |        |          |        |    |
|----|----------|----------|----------|----------|----------|----------|---|----------|--------|----------|--------|----------|--------|----|
| 8  | 1,048.58 | 524.79   | 1,031.55 | 516.28   | 1,030.57 | 515.79   | I | 1,429.85 | 715.43 | 1,412.83 | 706.92 | 1,411.84 | 706.43 | 11 |
| 9  | 1,162.62 | 581.81   | 1,145.60 | 573.30   | 1,144.61 | 572.81   | N | 1,316.77 | 658.89 | 1,299.74 | 650.38 | 1,298.76 | 649.88 | 10 |
| 10 | 1,275.71 | 638.36   | 1,258.68 | 629.84   | 1,257.70 | 629.35   | L | 1,202.73 | 601.87 | 1,185.70 | 593.35 | 1,184.72 | 592.86 | 9  |
| 11 | 1,389.75 | 695.38   | 1,372.72 | 686.87   | 1,371.74 | 686.37   | N | 1,089.64 | 545.32 | 1,072.62 | 536.81 | 1,071.63 | 536.32 | 8  |
| 12 | 1,488.82 | 744.91   | 1,471.79 | 736.40   | 1,470.81 | 735.91   | V | 975.60   | 488.30 | 958.57   | 479.79 | 957.59   | 479.30 | 7  |
| 13 | 1,585.87 | 793.44   | 1,568.84 | 784.93   | 1,567.86 | 784.43   | P | 876.53   | 438.77 | 859.50   | 430.26 | 858.52   | 429.76 | 6  |
| 14 | 1,732.94 | 866.97   | 1,715.91 | 858.46   | 1,714.93 | 857.97   | F | 779.48   | 390.24 | 762.45   | 381.73 | 761.47   | 381.24 | 5  |
| 15 | 1,861.98 | 931.49   | 1,844.96 | 922.98   | 1,843.97 | 922.49   | E | 632.41   | 316.71 | 615.38   | 308.20 | 614.40   | 307.70 | 4  |
| 16 | 1,961.05 | 981.03   | 1,944.02 | 972.52   | 1,943.04 | 972.02   | V | 503.37   | 252.19 | 486.34   | 243.67 |          |        | 3  |
| 17 | 2,074.13 | 1,037.57 | 2,057.11 | 1,029.06 | 2,056.12 | 1,028.57 | I | 404.30   | 202.65 | 387.27   | 194.14 |          |        | 2  |
| 18 |          |          |          |          |          |          | K | 291.21   | 146.11 | 274.19   | 137.60 |          |        | 1  |

Query 40209 Hit 1

MS/MS Fragmentation of **TEESPASDEAGEK**

Found in [sp|P05114|HMGNI\\_HUMAN](#), Non-histone chromosomal protein HMG-14 OS=Homo sapiens GN=HMGN1 PE=1 SV=3

Match to Query 40209: 1636.772from(819.3934,2+)

Title: 11: Scan 218 (rt=13.8644, f=2, i=11) [D:\lab212\membrane\Grace\Joyce\iTRAQ\_29\_1.raw]

Data File: Submitted from 20120508-1(merge) by Mascot Daemon on JOYCE-VAIO

Monoisotopic mass of neutral peptide Mr(calc): 1636.772

Variable modifications:

K13 iTRAQ4plex (K)

Ions Score: 64.45 Expect: 0.000

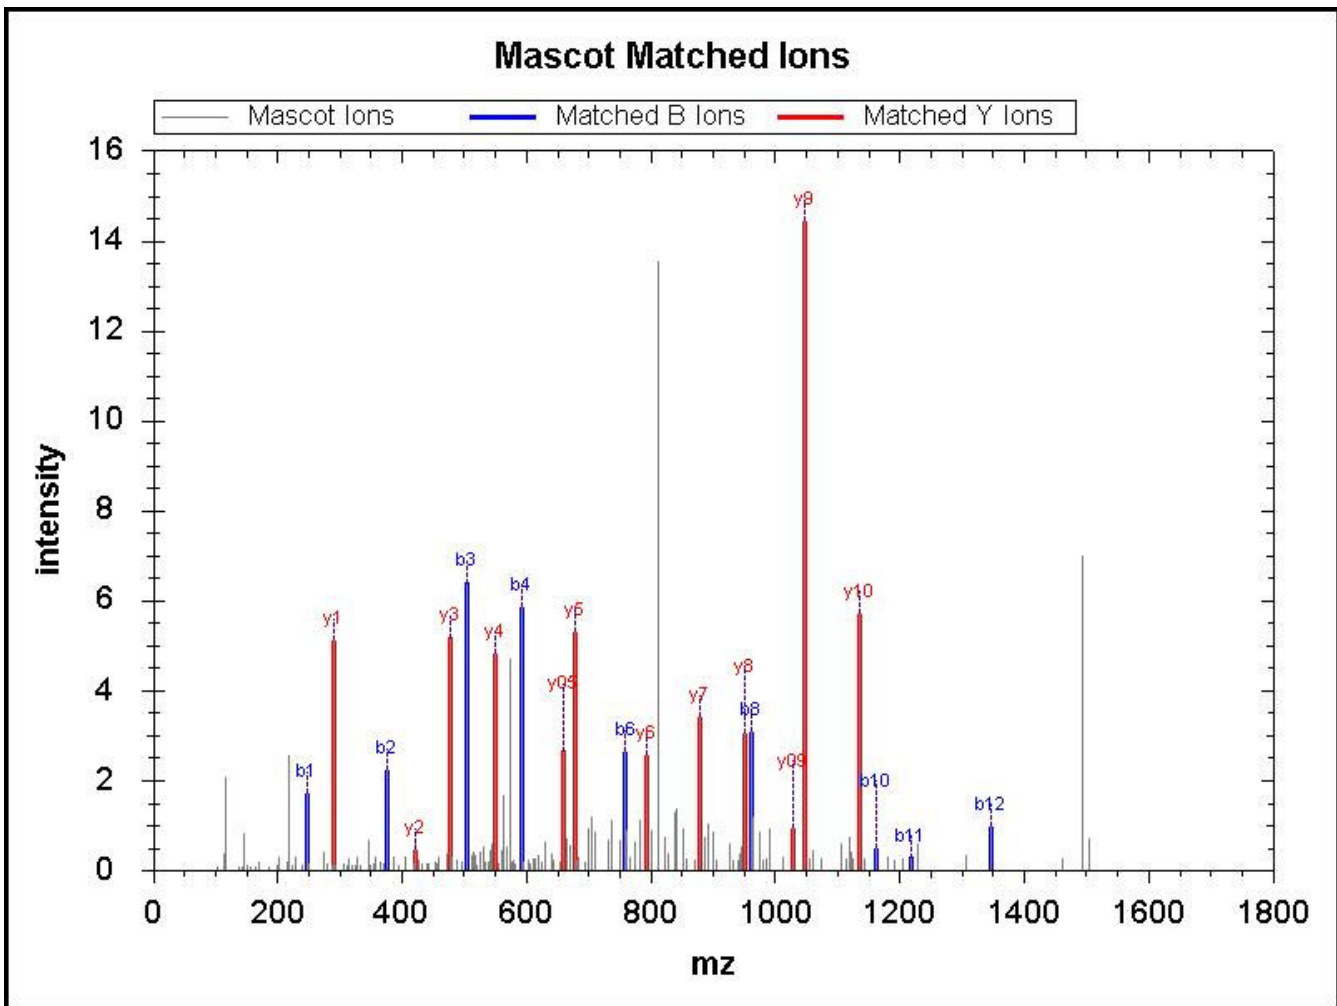

| No | b      | b++    | b0     | b0++   | Seq | y        | y++    | y*       | y*++   | y0       | y0++   | RevNo |
|----|--------|--------|--------|--------|-----|----------|--------|----------|--------|----------|--------|-------|
| 1  | 246.16 | 123.58 | 228.15 | 114.58 | T   |          |        |          |        |          |        | 13    |
| 2  | 375.20 | 188.10 | 357.19 | 179.10 | E   | 1,392.62 | 696.82 | 1,375.60 | 688.30 | 1,374.61 | 687.81 | 12    |

|    |          |        |          |        |   |          |        |          |        |          |        |    |
|----|----------|--------|----------|--------|---|----------|--------|----------|--------|----------|--------|----|
| 3  | 504.24   | 252.62 | 486.23   | 243.62 | E | 1,263.58 | 632.29 | 1,246.56 | 623.78 | 1,245.57 | 623.29 | 11 |
| 4  | 591.27   | 296.14 | 573.26   | 287.14 | S | 1,134.54 | 567.77 | 1,117.51 | 559.26 | 1,116.53 | 558.77 | 10 |
| 5  | 688.33   | 344.67 | 670.32   | 335.66 | P | 1,047.51 | 524.26 | 1,030.48 | 515.74 | 1,029.50 | 515.25 | 9  |
| 6  | 759.36   | 380.19 | 741.35   | 371.18 | A | 950.45   | 475.73 | 933.43   | 467.22 | 932.44   | 466.73 | 8  |
| 7  | 846.40   | 423.70 | 828.39   | 414.70 | S | 879.42   | 440.21 | 862.39   | 431.70 | 861.41   | 431.21 | 7  |
| 8  | 961.42   | 481.22 | 943.41   | 472.21 | D | 792.39   | 396.70 | 775.36   | 388.18 | 774.38   | 387.69 | 6  |
| 9  | 1,090.47 | 545.74 | 1,072.46 | 536.73 | E | 677.36   | 339.18 | 660.33   | 330.67 | 659.35   | 330.18 | 5  |
| 10 | 1,161.50 | 581.26 | 1,143.49 | 572.25 | A | 548.32   | 274.66 | 531.29   | 266.15 | 530.31   | 265.66 | 4  |
| 11 | 1,218.52 | 609.77 | 1,200.51 | 600.76 | G | 477.28   | 239.14 | 460.25   | 230.63 | 459.27   | 230.14 | 3  |
| 12 | 1,347.57 | 674.29 | 1,329.56 | 665.28 | E | 420.26   | 210.63 | 403.23   | 202.12 | 402.25   | 201.63 | 2  |
| 13 |          |        |          |        | K | 291.21   | 146.11 | 274.19   | 137.60 |          |        | 1  |

Query 59487 Hit 1

MS/MS Fragmentation of **HPNILAYIDGLETEK**

Found in **sp|Q96KG9|NTKL\_HUMAN**, N-terminal kinase-like protein OS=Homo sapiens GN=SCYL1 PE=1 SV=1

Match to Query 59487: 2000.084from(667.702,3+)

Title: 872: Sum of 2 scans in range 1937 (rt=53.206, f=4, i=586) to 1938 (rt=53.2314, f=4, i=587)

[D:\lab212\membrane\GraceJoyce\iTRAQ\_42\_1.raw]

Data File: Submitted from 20120508-1(merge) by Mascot Daemon on JOYCE-VAIO

Monoisotopic mass of neutral peptide Mr(calc): 2000.084

Variable modifications:

K15 iTRAQ4plex (K)

Ions Score: 64.38 Expect: 0.000

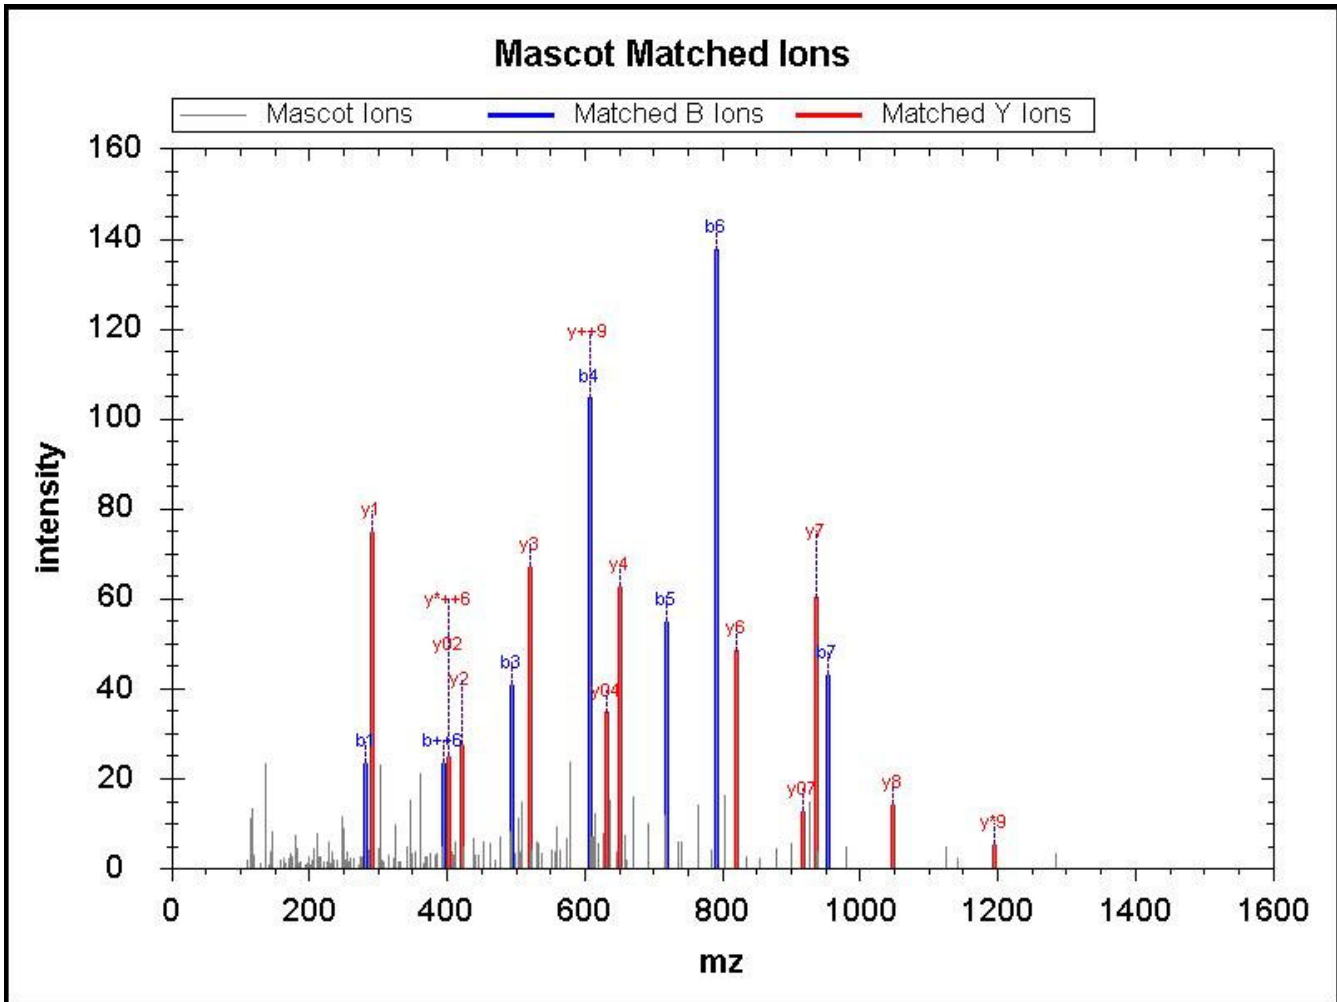

| No | b      | b++    | b* | b*++ | b0 | b0++ | Seq | y        | y++    | y*       | y*++   | y0       | y0++   | RevNo |
|----|--------|--------|----|------|----|------|-----|----------|--------|----------|--------|----------|--------|-------|
| 1  | 282.17 | 141.59 |    |      |    |      | H   |          |        |          |        |          |        | 15    |
| 2  | 379.22 | 190.11 |    |      |    |      | P   | 1,719.93 | 860.47 | 1,702.90 | 851.95 | 1,701.92 | 851.46 | 14    |





|    |          |          |          |          |          |          |   |          |          |          |          |          |          |    |
|----|----------|----------|----------|----------|----------|----------|---|----------|----------|----------|----------|----------|----------|----|
| 1  | 246.16   | 123.58   |          |          | 228.15   | 114.58   | T |          |          |          |          |          |          | 18 |
| 2  | 374.22   | 187.61   | 357.19   | 179.10   | 356.21   | 178.61   | Q | 2,045.99 | 1,023.50 | 2,028.97 | 1,014.99 | 2,027.98 | 1,014.49 | 17 |
| 3  | 445.25   | 223.13   | 428.23   | 214.62   | 427.24   | 214.12   | A | 1,917.93 | 959.47   | 1,900.91 | 950.96   | 1,899.92 | 950.47   | 16 |
| 4  | 544.32   | 272.66   | 527.29   | 264.15   | 526.31   | 263.66   | V | 1,846.90 | 923.95   | 1,829.87 | 915.44   | 1,828.89 | 914.95   | 15 |
| 5  | 691.39   | 346.20   | 674.36   | 337.69   | 673.38   | 337.19   | F | 1,747.83 | 874.42   | 1,730.80 | 865.90   | 1,729.82 | 865.41   | 14 |
| 6  | 805.43   | 403.22   | 788.41   | 394.71   | 787.42   | 394.21   | N | 1,600.76 | 800.88   | 1,583.73 | 792.37   | 1,582.75 | 791.88   | 13 |
| 7  | 942.49   | 471.75   | 925.46   | 463.24   | 924.48   | 462.74   | H | 1,486.72 | 743.86   | 1,469.69 | 735.35   | 1,468.71 | 734.86   | 12 |
| 8  | 1,043.54 | 522.27   | 1,026.51 | 513.76   | 1,025.53 | 513.27   | T | 1,349.66 | 675.33   | 1,332.63 | 666.82   | 1,331.65 | 666.33   | 11 |
| 9  | 1,172.58 | 586.79   | 1,155.56 | 578.28   | 1,154.57 | 577.79   | E | 1,248.61 | 624.81   | 1,231.58 | 616.30   | 1,230.60 | 615.80   | 10 |
| 10 | 1,287.61 | 644.31   | 1,270.58 | 635.79   | 1,269.60 | 635.30   | D | 1,119.57 | 560.29   | 1,102.54 | 551.77   | 1,101.56 | 551.28   | 9  |
| 11 | 1,450.67 | 725.84   | 1,433.65 | 717.33   | 1,432.66 | 716.83   | Y | 1,004.54 | 502.77   | 987.51   | 494.26   | 986.53   | 493.77   | 8  |
| 12 | 1,549.74 | 775.37   | 1,532.71 | 766.86   | 1,531.73 | 766.37   | V | 841.48   | 421.24   | 824.45   | 412.73   | 823.47   | 412.24   | 7  |
| 13 | 1,662.82 | 831.92   | 1,645.80 | 823.40   | 1,644.81 | 822.91   | L | 742.41   | 371.71   | 725.38   | 363.20   | 724.40   | 362.70   | 6  |
| 14 | 1,775.91 | 888.46   | 1,758.88 | 879.94   | 1,757.90 | 879.45   | L | 629.33   | 315.17   | 612.30   | 306.65   | 611.31   | 306.16   | 5  |
| 15 | 1,872.96 | 936.98   | 1,855.93 | 928.47   | 1,854.95 | 927.98   | P | 516.24   | 258.62   | 499.21   | 250.11   | 498.23   | 249.62   | 4  |
| 16 | 1,987.99 | 994.50   | 1,970.96 | 985.98   | 1,969.98 | 985.49   | D | 419.19   | 210.10   | 402.16   | 201.58   | 401.18   | 201.09   | 3  |
| 17 | 2,117.03 | 1,059.02 | 2,100.00 | 1,050.51 | 2,099.02 | 1,050.01 | E | 304.16   | 152.58   | 287.13   | 144.07   | 286.15   | 143.58   | 2  |
| 18 |          |          |          |          |          |          | R | 175.12   | 88.06    | 158.09   | 79.55    |          |          | 1  |

Query 78098 Hit 1

MS/MS Fragmentation of **IEEYNHVLIEETDQLWK**

Found in [sp|Q14241|ELOA1\\_HUMAN](#), Transcription elongation factor B polypeptide 3 OS=Homo sapiens GN=TCEB3 PE=1 SV=2

Match to Query 78098: 2446.264from(816.4286,3+)

Title: 881: Scan 1957 (rt=53.5917, f=3, i=295) [D:\lab212\membrane\Grace\Joyce\iTRAQ\_39\_1.raw]

Data File: Submitted from 20120508-1(merge) by Mascot Daemon on JOYCE-VAIO

Monoisotopic mass of neutral peptide Mr(calc): 2446.264

Variable modifications:

K17 :iTRAQ4plex (K)

Ions Score: 63.85 Expect: 0.000

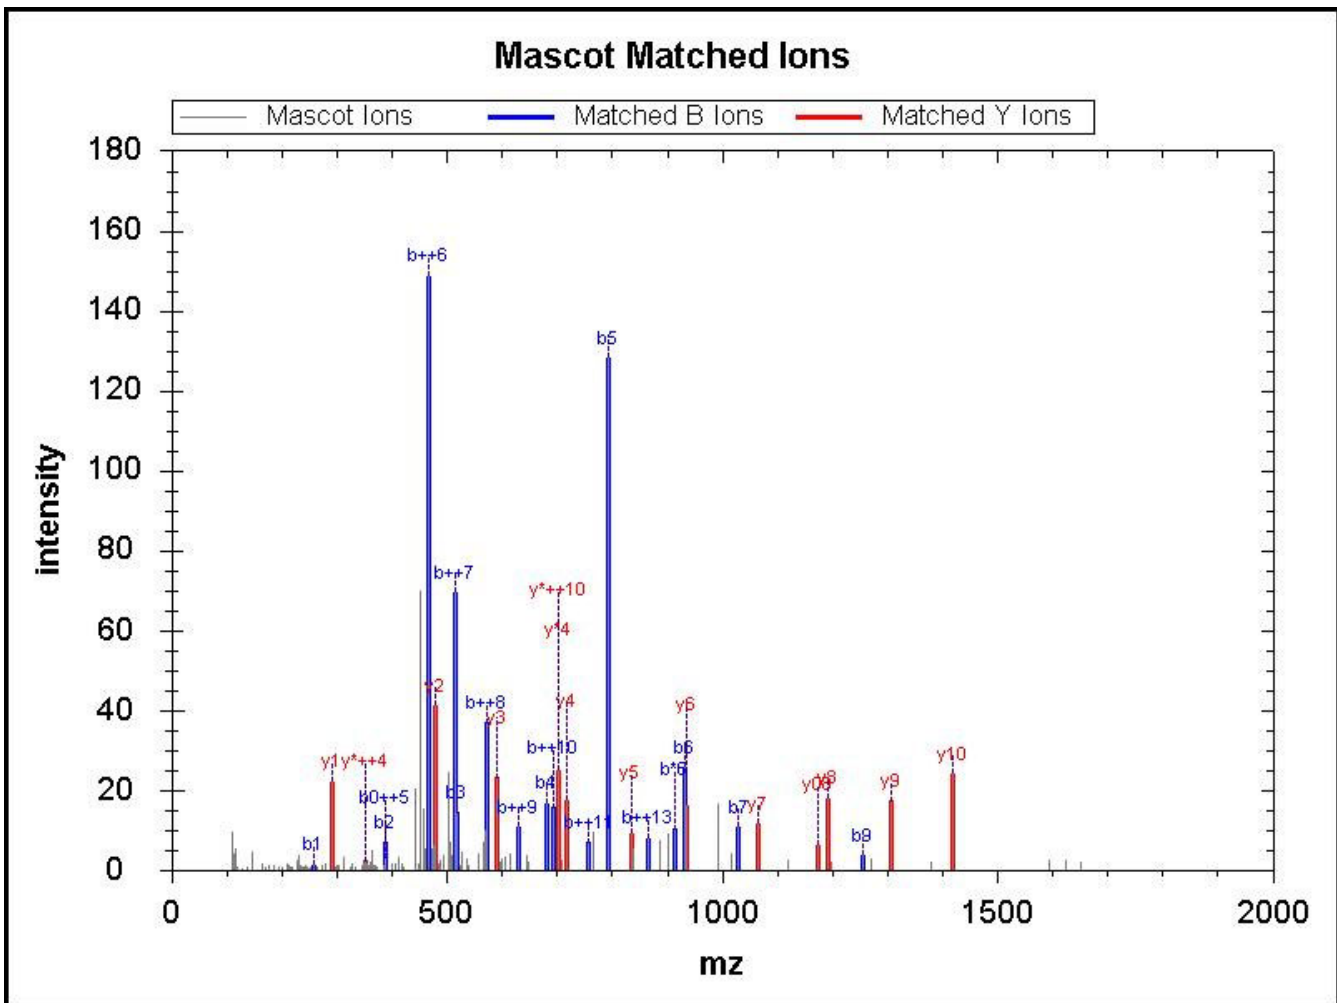

| No | b        | b++      | b*       | b*++     | b0       | b0++     | Seq | y        | y++      | y*       | y*++     | y0       | y0++     | RevNo |
|----|----------|----------|----------|----------|----------|----------|-----|----------|----------|----------|----------|----------|----------|-------|
| 1  | 258.19   | 129.60   |          |          |          |          | I   |          |          |          |          |          |          | 17    |
| 2  | 387.24   | 194.12   |          |          | 369.23   | 185.12   | E   | 2,190.08 | 1,095.55 | 2,173.06 | 1,087.03 | 2,172.07 | 1,086.54 | 16    |
| 3  | 516.28   | 258.64   |          |          | 498.27   | 249.64   | E   | 2,061.04 | 1,031.02 | 2,044.01 | 1,022.51 | 2,043.03 | 1,022.02 | 15    |
| 4  | 679.34   | 340.17   |          |          | 661.33   | 331.17   | Y   | 1,932.00 | 966.50   | 1,914.97 | 957.99   | 1,913.99 | 957.50   | 14    |
| 5  | 793.38   | 397.20   | 776.36   | 388.68   | 775.37   | 388.19   | N   | 1,768.94 | 884.97   | 1,751.91 | 876.46   | 1,750.92 | 875.97   | 13    |
| 6  | 930.44   | 465.73   | 913.42   | 457.21   | 912.43   | 456.72   | H   | 1,654.89 | 827.95   | 1,637.87 | 819.44   | 1,636.88 | 818.94   | 12    |
| 7  | 1,029.51 | 515.26   | 1,012.49 | 506.75   | 1,011.50 | 506.25   | V   | 1,517.83 | 759.42   | 1,500.81 | 750.91   | 1,499.82 | 750.41   | 11    |
| 8  | 1,142.60 | 571.80   | 1,125.57 | 563.29   | 1,124.59 | 562.80   | L   | 1,418.76 | 709.89   | 1,401.74 | 701.37   | 1,400.75 | 700.88   | 10    |
| 9  | 1,255.68 | 628.34   | 1,238.65 | 619.83   | 1,237.67 | 619.34   | I   | 1,305.68 | 653.34   | 1,288.65 | 644.83   | 1,287.67 | 644.34   | 9     |
| 10 | 1,384.72 | 692.87   | 1,367.70 | 684.35   | 1,366.71 | 683.86   | E   | 1,192.60 | 596.80   | 1,175.57 | 588.29   | 1,174.59 | 587.80   | 8     |
| 11 | 1,513.77 | 757.39   | 1,496.74 | 748.87   | 1,495.75 | 748.38   | E   | 1,063.55 | 532.28   | 1,046.53 | 523.77   | 1,045.54 | 523.28   | 7     |
| 12 | 1,614.81 | 807.91   | 1,597.79 | 799.40   | 1,596.80 | 798.90   | T   | 934.51   | 467.76   | 917.48   | 459.25   | 916.50   | 458.75   | 6     |
| 13 | 1,729.84 | 865.42   | 1,712.81 | 856.91   | 1,711.83 | 856.42   | D   | 833.46   | 417.24   | 816.44   | 408.72   | 815.45   | 408.23   | 5     |
| 14 | 1,857.90 | 929.45   | 1,840.87 | 920.94   | 1,839.89 | 920.45   | Q   | 718.44   | 359.72   | 701.41   | 351.21   |          |          | 4     |
| 15 | 1,970.98 | 986.00   | 1,953.96 | 977.48   | 1,952.97 | 976.99   | L   | 590.38   | 295.69   | 573.35   | 287.18   |          |          | 3     |
| 16 | 2,157.06 | 1,079.03 | 2,140.04 | 1,070.52 | 2,139.05 | 1,070.03 | W   | 477.29   | 239.15   | 460.27   | 230.64   |          |          | 2     |
| 17 |          |          |          |          |          |          | K   | 291.21   | 146.11   | 274.19   | 137.60   |          |          | 1     |

Query 62484 Hit 1

MS/MS Fragmentation of **GSLDPESIFEMMETGK**

Found in **sp|Q15024|EXOS7\_HUMAN**, Exosome complex component RRP42 OS=Homo sapiens GN=EXOSC7 PE=1 SV=3

Match to Query 62484: 2057.99from(687.004,3+)

Title: 1071: Sum of 2 scans in range 2394 (rt=63.2646, f=4, i=723) to 2395 (rt=63.29, f=4, i=724)

[D:\lab212\membrane\Grace\Joyce\iTRAQ\_27\_1.raw]

Data File: Submitted from 20120508-1(merge) by Mascot Daemon on JOYCE-VAIO

Monoisotopic mass of neutral peptide Mr(calc): 2057.99

Variable modifications:

K16 iTRAQ4plex (K)

Ions Score: 63.64 Expect: 0.000

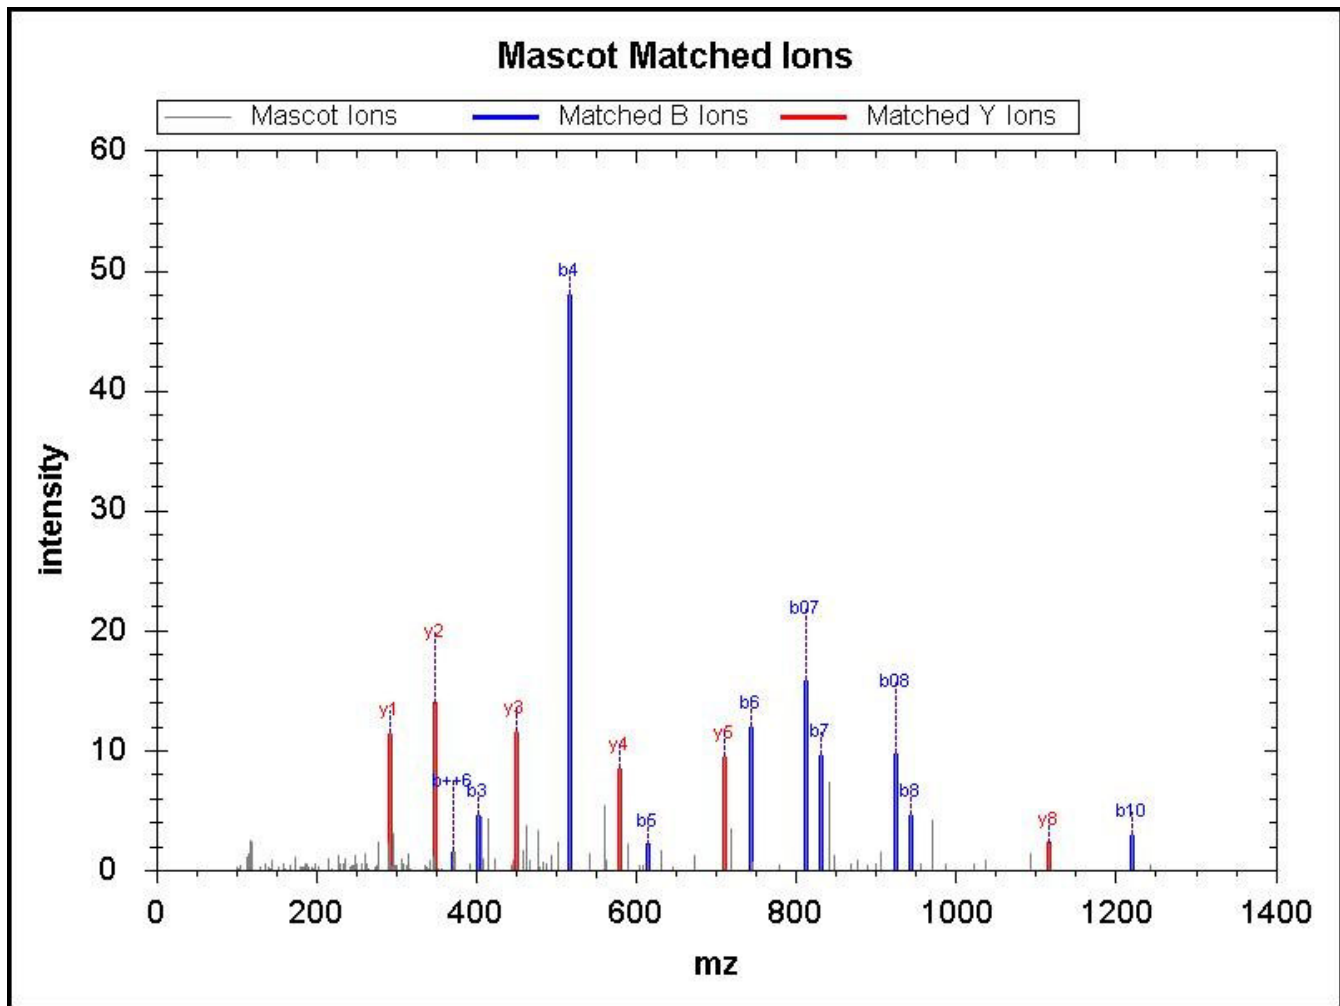

| No | b        | b++    | b0       | b0++   | Seq | y        | y++    | y*       | y*++   | y0       | y0++   | RevNo |
|----|----------|--------|----------|--------|-----|----------|--------|----------|--------|----------|--------|-------|
| 1  | 202.13   | 101.57 |          |        | G   |          |        |          |        |          |        | 16    |
| 2  | 289.16   | 145.09 | 271.15   | 136.08 | S   | 1,857.87 | 929.44 | 1,840.85 | 920.93 | 1,839.86 | 920.43 | 15    |
| 3  | 402.25   | 201.63 | 384.24   | 192.62 | L   | 1,770.84 | 885.92 | 1,753.81 | 877.41 | 1,752.83 | 876.92 | 14    |
| 4  | 517.27   | 259.14 | 499.26   | 250.14 | D   | 1,657.76 | 829.38 | 1,640.73 | 820.87 | 1,639.75 | 820.38 | 13    |
| 5  | 614.33   | 307.67 | 596.32   | 298.66 | P   | 1,542.73 | 771.87 | 1,525.70 | 763.36 | 1,524.72 | 762.86 | 12    |
| 6  | 743.37   | 372.19 | 725.36   | 363.18 | E   | 1,445.68 | 723.34 | 1,428.65 | 714.83 | 1,427.67 | 714.34 | 11    |
| 7  | 830.40   | 415.70 | 812.39   | 406.70 | S   | 1,316.63 | 658.82 | 1,299.61 | 650.31 | 1,298.62 | 649.82 | 10    |
| 8  | 943.49   | 472.25 | 925.47   | 463.24 | I   | 1,229.60 | 615.30 | 1,212.58 | 606.79 | 1,211.59 | 606.30 | 9     |
| 9  | 1,090.55 | 545.78 | 1,072.54 | 536.78 | F   | 1,116.52 | 558.76 | 1,099.49 | 550.25 | 1,098.51 | 549.76 | 8     |
| 10 | 1,219.60 | 610.30 | 1,201.59 | 601.30 | E   | 969.45   | 485.23 | 952.42   | 476.72 | 951.44   | 476.22 | 7     |
| 11 | 1,350.64 | 675.82 | 1,332.63 | 666.82 | M   | 840.41   | 420.71 | 823.38   | 412.19 | 822.40   | 411.70 | 6     |
| 12 | 1,481.68 | 741.34 | 1,463.67 | 732.34 | M   | 709.37   | 355.19 | 692.34   | 346.67 | 691.36   | 346.18 | 5     |
| 13 | 1,610.72 | 805.86 | 1,592.71 | 796.86 | E   | 578.33   | 289.67 | 561.30   | 281.15 | 560.32   | 280.66 | 4     |
| 14 | 1,711.77 | 856.39 | 1,693.76 | 847.38 | T   | 449.28   | 225.15 | 432.26   | 216.63 | 431.27   | 216.14 | 3     |
| 15 | 1,768.79 | 884.90 | 1,750.78 | 875.89 | G   | 348.24   | 174.62 | 331.21   | 166.11 |          |        | 2     |
| 16 |          |        |          |        | K   | 291.21   | 146.11 | 274.19   | 137.60 |          |        | 1     |

Query 86508 Hit 1

MS/MS Fragmentation of VLHNQLVLFHNAIAAYFAGNQK

Found in sp|P53367|ARFP1\_HUMAN, Arfaptin-1 OS=Homo sapiens GN=ARFIP1 PE=1 SV=2

Match to Query 86508: 2755.524from(689.8882,4+)

Title: 878: Scan 2274 (rt=59.4983, f=2, i=392) [D:\lab212\membrane\Grace\Joyce\iTRAQ\_48\_1.raw]

Data File: Submitted from 20120508-1(merge) by Mascot Daemon on JOYCE-VAIO

Monoisotopic mass of neutral peptide Mr(calc): 2755.524

Variable modifications:

K22 :iTRAQ4plex (K)

Ions Score: 63.51 Expect: 0.000

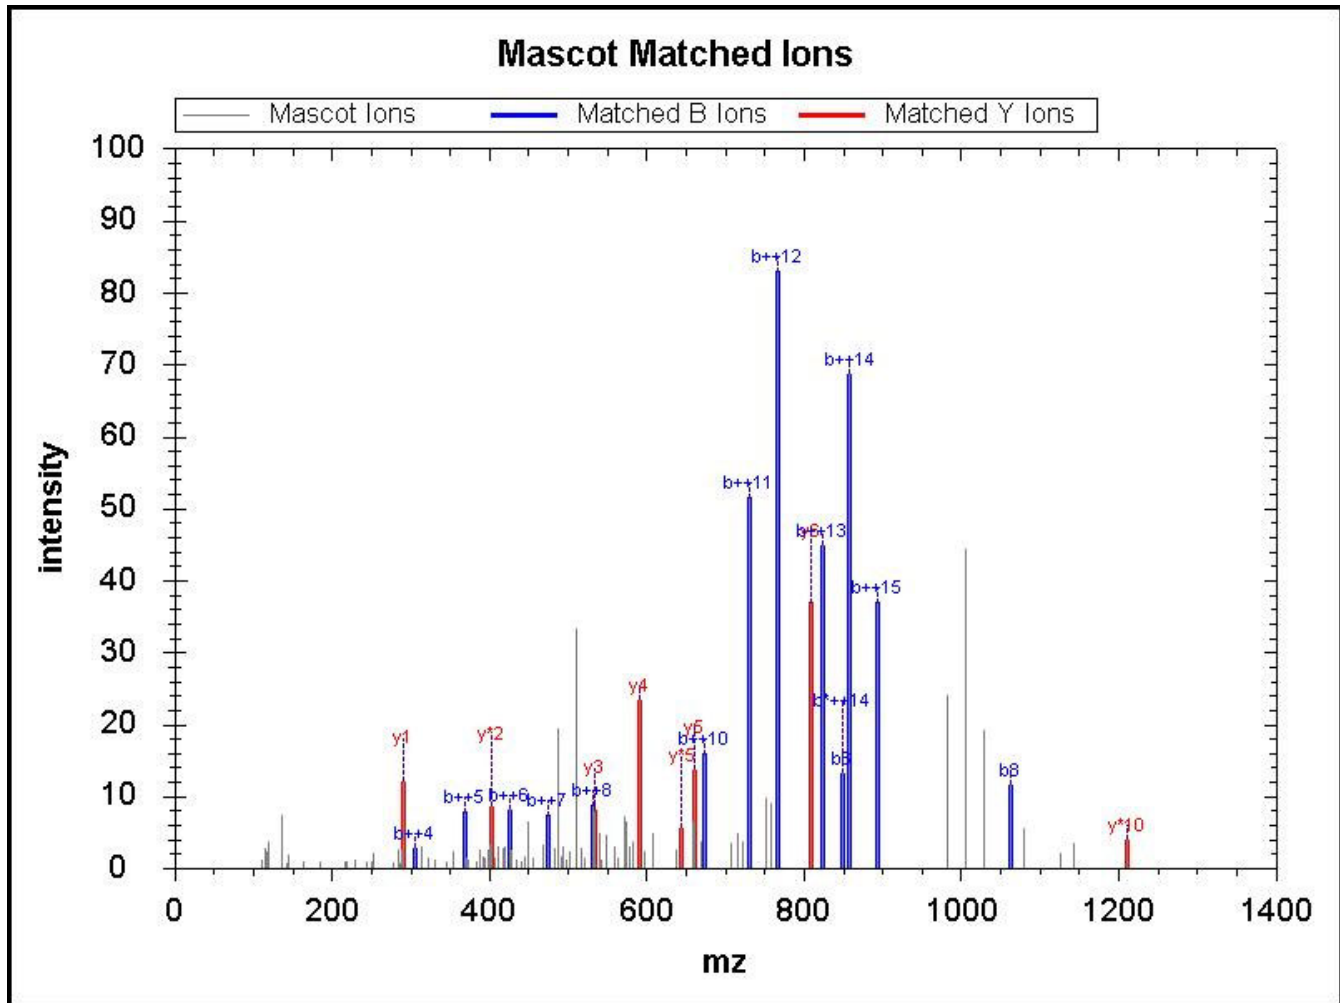

| No | b        | b++      | b*       | b*++     | Seq | y        | y++      | y*       | y*++     | RevNo |
|----|----------|----------|----------|----------|-----|----------|----------|----------|----------|-------|
| 1  | 244.18   | 122.59   |          |          | V   |          |          |          |          | 22    |
| 2  | 357.26   | 179.13   |          |          | L   | 2,513.35 | 1,257.18 | 2,496.33 | 1,248.67 | 21    |
| 3  | 494.32   | 247.66   |          |          | H   | 2,400.27 | 1,200.64 | 2,383.24 | 1,192.13 | 20    |
| 4  | 608.36   | 304.69   | 591.34   | 296.17   | N   | 2,263.21 | 1,132.11 | 2,246.18 | 1,123.60 | 19    |
| 5  | 736.42   | 368.71   | 719.40   | 360.20   | Q   | 2,149.17 | 1,075.09 | 2,132.14 | 1,066.57 | 18    |
| 6  | 849.51   | 425.26   | 832.48   | 416.74   | L   | 2,021.11 | 1,011.06 | 2,004.08 | 1,002.54 | 17    |
| 7  | 948.57   | 474.79   | 931.55   | 466.28   | V   | 1,908.03 | 954.52   | 1,891.00 | 946.00   | 16    |
| 8  | 1,061.66 | 531.33   | 1,044.63 | 522.82   | L   | 1,808.96 | 904.98   | 1,791.93 | 896.47   | 15    |
| 9  | 1,208.73 | 604.87   | 1,191.70 | 596.35   | F   | 1,695.87 | 848.44   | 1,678.85 | 839.93   | 14    |
| 10 | 1,345.79 | 673.40   | 1,328.76 | 664.88   | H   | 1,548.80 | 774.91   | 1,531.78 | 766.39   | 13    |
| 11 | 1,459.83 | 730.42   | 1,442.80 | 721.91   | N   | 1,411.75 | 706.38   | 1,394.72 | 697.86   | 12    |
| 12 | 1,530.87 | 765.94   | 1,513.84 | 757.42   | A   | 1,297.70 | 649.35   | 1,280.68 | 640.84   | 11    |
| 13 | 1,643.95 | 822.48   | 1,626.92 | 813.97   | I   | 1,226.67 | 613.84   | 1,209.64 | 605.32   | 10    |
| 14 | 1,714.99 | 858.00   | 1,697.96 | 849.48   | A   | 1,113.58 | 557.29   | 1,096.55 | 548.78   | 9     |
| 15 | 1,786.02 | 893.52   | 1,769.00 | 885.00   | A   | 1,042.54 | 521.78   | 1,025.52 | 513.26   | 8     |
| 16 | 1,949.09 | 975.05   | 1,932.06 | 966.53   | Y   | 971.51   | 486.26   | 954.48   | 477.74   | 7     |
| 17 | 2,096.16 | 1,048.58 | 2,079.13 | 1,040.07 | F   | 808.44   | 404.73   | 791.42   | 396.21   | 6     |

|    |          |          |          |          |   |        |        |        |        |   |
|----|----------|----------|----------|----------|---|--------|--------|--------|--------|---|
| 18 | 2,167.19 | 1,084.10 | 2,150.17 | 1,075.59 | A | 661.37 | 331.19 | 644.35 | 322.68 | 5 |
| 19 | 2,224.22 | 1,112.61 | 2,207.19 | 1,104.10 | G | 590.34 | 295.67 | 573.31 | 287.16 | 4 |
| 20 | 2,338.26 | 1,169.63 | 2,321.23 | 1,161.12 | N | 533.32 | 267.16 | 516.29 | 258.65 | 3 |
| 21 | 2,466.32 | 1,233.66 | 2,449.29 | 1,225.15 | Q | 419.27 | 210.14 | 402.25 | 201.63 | 2 |
| 22 |          |          |          |          | K | 291.21 | 146.11 | 274.19 | 137.60 | 1 |

Query 33737 Hit 1

MS/MS Fragmentation of **EVLLAQDMAVR**

Found in **sp|Q9NWU5|RM22\_HUMAN**, 39S ribosomal protein L22

Match to Query 33737: 1516.808from(759.4111,2+)

Title: 444: Scan 1519 (rt=41.5458, f=3, i=155) [D:\lab212\membrane\Grace\Joyce\20120320\_iTRAQ\_20-2.raw]

Data File: Submitted from 20120508-1(merge) by Mascot Daemon on JOYCE-VAIO

Monoisotopic mass of neutral peptide Mr(calc): 1516.808

Variable modifications:

Ions Score: 63.43 Expect: 0.000

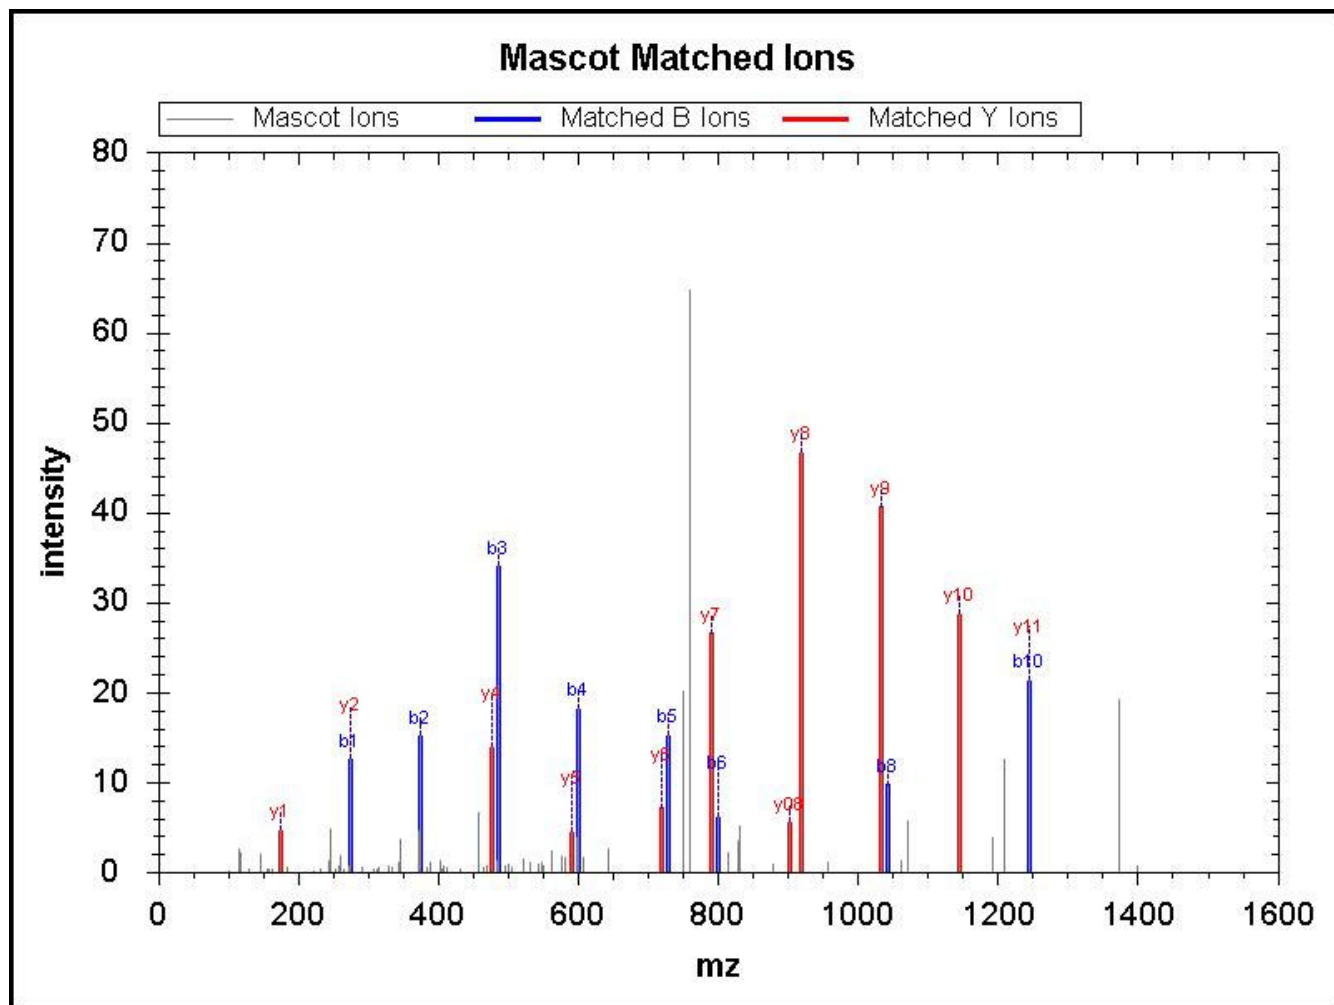

| No | b        | b++    | b*       | b*++   | b0       | b0++   | Seq | y        | y++    | y*       | y*++   | y0       | y0++   | RevNo |
|----|----------|--------|----------|--------|----------|--------|-----|----------|--------|----------|--------|----------|--------|-------|
| 1  | 274.15   | 137.58 |          |        | 256.14   | 128.57 | E   |          |        |          |        |          |        | 12    |
| 2  | 373.22   | 187.11 |          |        | 355.21   | 178.11 | V   | 1,244.67 | 622.84 | 1,227.64 | 614.32 | 1,226.66 | 613.83 | 11    |
| 3  | 486.30   | 243.66 |          |        | 468.29   | 234.65 | L   | 1,145.60 | 573.30 | 1,128.57 | 564.79 | 1,127.59 | 564.30 | 10    |
| 4  | 599.39   | 300.20 |          |        | 581.38   | 291.19 | L   | 1,032.51 | 516.76 | 1,015.49 | 508.25 | 1,014.50 | 507.76 | 9     |
| 5  | 728.43   | 364.72 |          |        | 710.42   | 355.71 | E   | 919.43   | 460.22 | 902.40   | 451.71 | 901.42   | 451.21 | 8     |
| 6  | 799.47   | 400.24 |          |        | 781.46   | 391.23 | A   | 790.39   | 395.70 | 773.36   | 387.18 | 772.38   | 386.69 | 7     |
| 7  | 927.53   | 464.27 | 910.50   | 455.75 | 909.52   | 455.26 | Q   | 719.35   | 360.18 | 702.32   | 351.67 | 701.34   | 351.17 | 6     |
| 8  | 1,042.55 | 521.78 | 1,025.53 | 513.27 | 1,024.54 | 512.78 | D   | 591.29   | 296.15 | 574.27   | 287.64 | 573.28   | 287.14 | 5     |
| 9  | 1,173.59 | 587.30 | 1,156.57 | 578.79 | 1,155.58 | 578.30 | M   | 476.26   | 238.64 | 459.24   | 230.12 |          |        | 4     |
| 10 | 1,244.63 | 622.82 | 1,227.60 | 614.31 | 1,226.62 | 613.81 | A   | 345.22   | 173.12 | 328.20   | 164.60 |          |        | 3     |

|    |          |        |          |        |          |        |   |        |        |        |        |  |  |   |
|----|----------|--------|----------|--------|----------|--------|---|--------|--------|--------|--------|--|--|---|
| 11 | 1,343.70 | 672.35 | 1,326.67 | 663.84 | 1,325.69 | 663.35 | V | 274.19 | 137.60 | 257.16 | 129.08 |  |  | 2 |
| 12 |          |        |          |        |          |        | R | 175.12 | 88.06  | 158.09 | 79.55  |  |  | 1 |

Query 34186 Hit 1

MS/MS Fragmentation of **QGLQTTQAHLER**

Found in **sp|Q14C86|GAPD1\_HUMAN**, GTPase-activating protein and VPS9 domain-containing protein 1 OS=Homo sapiens  
 GN=GAPVD1 PE=1 SV=2

Match to Query 34186: 1524.822from(509.2813,3+)

Title: 175: Scan 486 (rt=20.4445, f=2, i=84) [D:\lab212\membrane\Grace\Joyce\iTRAQ\_39\_1.raw]

Data File: Submitted from 20120508-1(merge) by Mascot Daemon on JOYCE-VAIO

Monoisotopic mass of neutral peptide Mr(calc): 1524.822

Variable modifications:

Ions Score: 63.17 Expect: 0.000

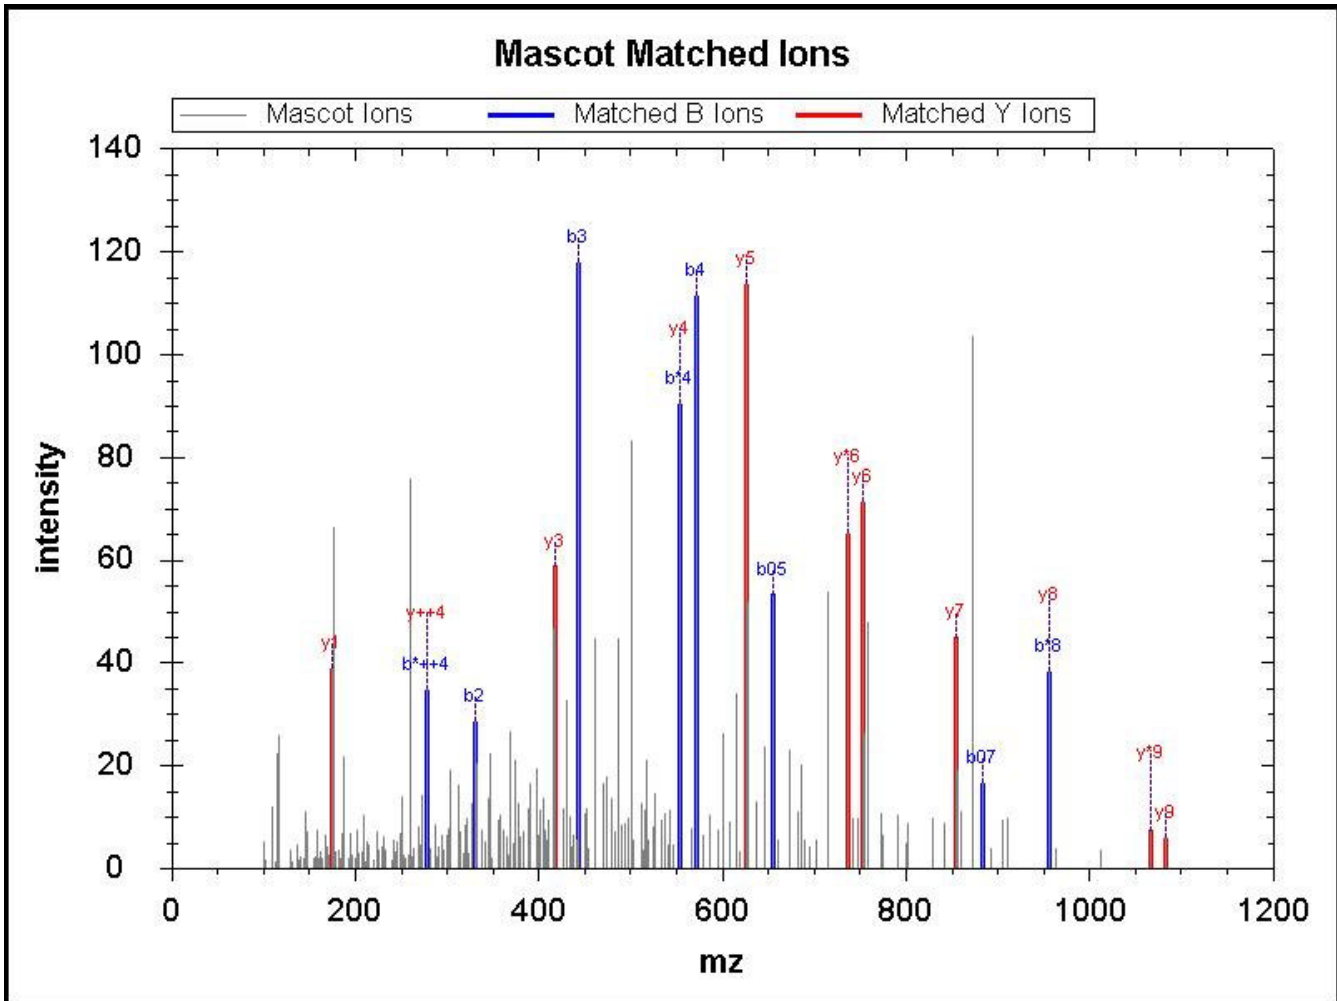

| No | b        | b++    | b*       | b*++   | b0       | b0++   | Seq | y        | y++    | y*       | y*++   | y0       | y0++   | RevNo |
|----|----------|--------|----------|--------|----------|--------|-----|----------|--------|----------|--------|----------|--------|-------|
| 1  | 273.17   | 137.09 | 256.14   | 128.57 |          |        | Q   |          |        |          |        |          |        | 12    |
| 2  | 330.19   | 165.60 | 313.16   | 157.09 |          |        | G   | 1,253.66 | 627.33 | 1,236.63 | 618.82 | 1,235.65 | 618.33 | 11    |
| 3  | 443.27   | 222.14 | 426.25   | 213.63 |          |        | L   | 1,196.64 | 598.82 | 1,179.61 | 590.31 | 1,178.63 | 589.82 | 10    |
| 4  | 571.33   | 286.17 | 554.31   | 277.66 |          |        | Q   | 1,083.55 | 542.28 | 1,066.53 | 533.77 | 1,065.54 | 533.28 | 9     |
| 5  | 672.38   | 336.69 | 655.35   | 328.18 | 654.37   | 327.69 | T   | 955.50   | 478.25 | 938.47   | 469.74 | 937.48   | 469.25 | 8     |
| 6  | 773.43   | 387.22 | 756.40   | 378.70 | 755.42   | 378.21 | T   | 854.45   | 427.73 | 837.42   | 419.21 | 836.44   | 418.72 | 7     |
| 7  | 901.49   | 451.25 | 884.46   | 442.73 | 883.48   | 442.24 | Q   | 753.40   | 377.20 | 736.37   | 368.69 | 735.39   | 368.20 | 6     |
| 8  | 972.52   | 486.77 | 955.50   | 478.25 | 954.51   | 477.76 | A   | 625.34   | 313.17 | 608.32   | 304.66 | 607.33   | 304.17 | 5     |
| 9  | 1,109.58 | 555.29 | 1,092.56 | 546.78 | 1,091.57 | 546.29 | H   | 554.30   | 277.66 | 537.28   | 269.14 | 536.29   | 268.65 | 4     |
| 10 | 1,222.67 | 611.84 | 1,205.64 | 603.32 | 1,204.66 | 602.83 | L   | 417.25   | 209.13 | 400.22   | 200.61 | 399.24   | 200.12 | 3     |
| 11 | 1,351.71 | 676.36 | 1,334.68 | 667.84 | 1,333.70 | 667.35 | E   | 304.16   | 152.58 | 287.13   | 144.07 | 286.15   | 143.58 | 2     |
| 12 |          |        |          |        |          |        | R   | 175.12   | 88.06  | 158.09   | 79.55  |          |        | 1     |

Query 40894 Hit 1

MS/MS Fragmentation of **LPPVLSHPIFDNR**

Found in **sp|Q04206|TF65\_HUMAN**, Transcription factor p65 OS=Homo sapiens GN=RELA PE=1 SV=2

Match to Query 40894: 1647.923from(550.3148,3+)

Title: 703: Scan 1594 (rt=45.3132, f=3, i=239) [D:\lab212\membrane\Grace\Joyce\iTRAQ\_35\_2.raw]

Data File: Submitted from 20120508-1(merge) by Mascot Daemon on JOYCE-VAIO

Monoisotopic mass of neutral peptide Mr(calc): 1647.923

Variable modifications:

Ions Score: 62.94 Expect: 0.000

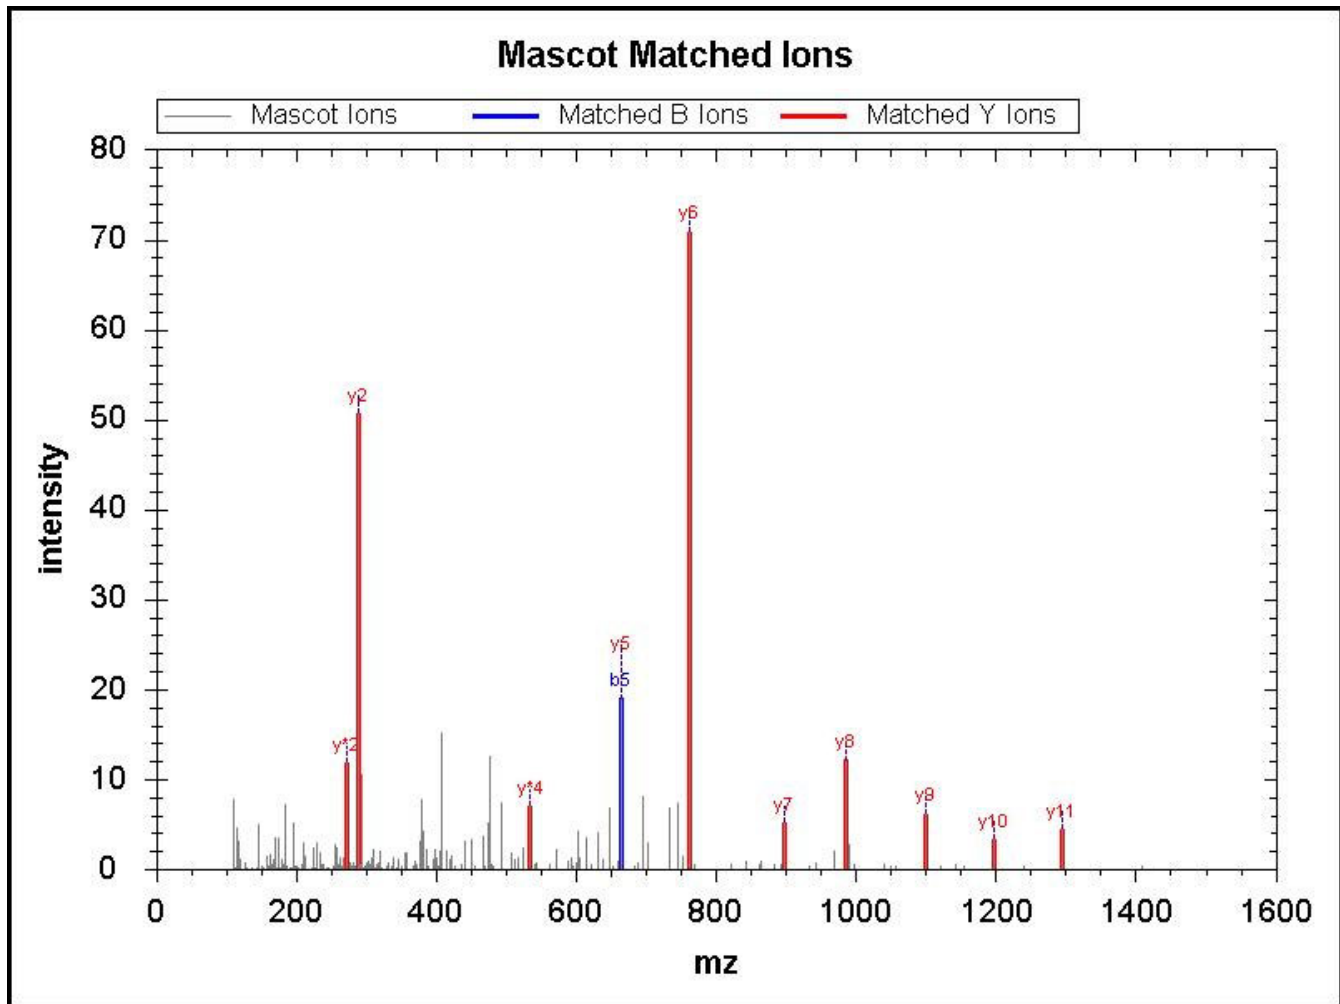

| No | b        | b++    | b*       | b*++   | b0       | b0++   | Seq | y        | y++    | y*       | y*++   | y0       | y0++   | RevNo |
|----|----------|--------|----------|--------|----------|--------|-----|----------|--------|----------|--------|----------|--------|-------|
| 1  | 258.19   | 129.60 |          |        |          |        | L   |          |        |          |        |          |        | 13    |
| 2  | 355.25   | 178.13 |          |        |          |        | P   | 1,391.74 | 696.38 | 1,374.72 | 687.86 | 1,373.73 | 687.37 | 12    |
| 3  | 452.30   | 226.65 |          |        |          |        | P   | 1,294.69 | 647.85 | 1,277.66 | 639.34 | 1,276.68 | 638.84 | 11    |
| 4  | 551.37   | 276.19 |          |        |          |        | V   | 1,197.64 | 599.32 | 1,180.61 | 590.81 | 1,179.63 | 590.32 | 10    |
| 5  | 664.45   | 332.73 |          |        |          |        | L   | 1,098.57 | 549.79 | 1,081.54 | 541.27 | 1,080.56 | 540.78 | 9     |
| 6  | 751.48   | 376.25 |          |        | 733.47   | 367.24 | S   | 985.48   | 493.25 | 968.46   | 484.73 | 967.47   | 484.24 | 8     |
| 7  | 888.54   | 444.77 |          |        | 870.53   | 435.77 | H   | 898.45   | 449.73 | 881.43   | 441.22 | 880.44   | 440.72 | 7     |
| 8  | 985.60   | 493.30 |          |        | 967.58   | 484.30 | P   | 761.39   | 381.20 | 744.37   | 372.69 | 743.38   | 372.20 | 6     |
| 9  | 1,098.68 | 549.84 |          |        | 1,080.67 | 540.84 | I   | 664.34   | 332.67 | 647.31   | 324.16 | 646.33   | 323.67 | 5     |
| 10 | 1,245.75 | 623.38 |          |        | 1,227.74 | 614.37 | F   | 551.26   | 276.13 | 534.23   | 267.62 | 533.25   | 267.13 | 4     |
| 11 | 1,360.77 | 680.89 |          |        | 1,342.76 | 671.89 | D   | 404.19   | 202.60 | 387.16   | 194.08 | 386.18   | 193.59 | 3     |
| 12 | 1,474.82 | 737.91 | 1,457.79 | 729.40 | 1,456.81 | 728.91 | N   | 289.16   | 145.08 | 272.14   | 136.57 |          |        | 2     |
| 13 |          |        |          |        |          |        | R   | 175.12   | 88.06  | 158.09   | 79.55  |          |        | 1     |

Query 68822 Hit 1

MS/MS Fragmentation of **LPPEVANFMQLVELDVSR**

Found in [sp|Q14160|SCRIB\\_HUMAN](#), Protein scribble homolog OS=Homo sapiens GN=SCRIB PE=1 SV=4

Match to Query 68822: 2200.166from(734.3958,3+)

Title: 1317: Sum of 2 scans in range 3033 (rt=77.3954, f=4, i=877) to 3034 (rt=77.4208, f=4, i=878)

[D:\lab212\membrane\GraceJoyce\iTRAQ\_21\_1.raw]

Data File: Submitted from 20120508-1(merge) by Mascot Daemon on JOYCE-VAIO

Monoisotopic mass of neutral peptide Mr(calc): 2200.166

Variable modifications:

Ions Score: 62.77 Expect: 0.000

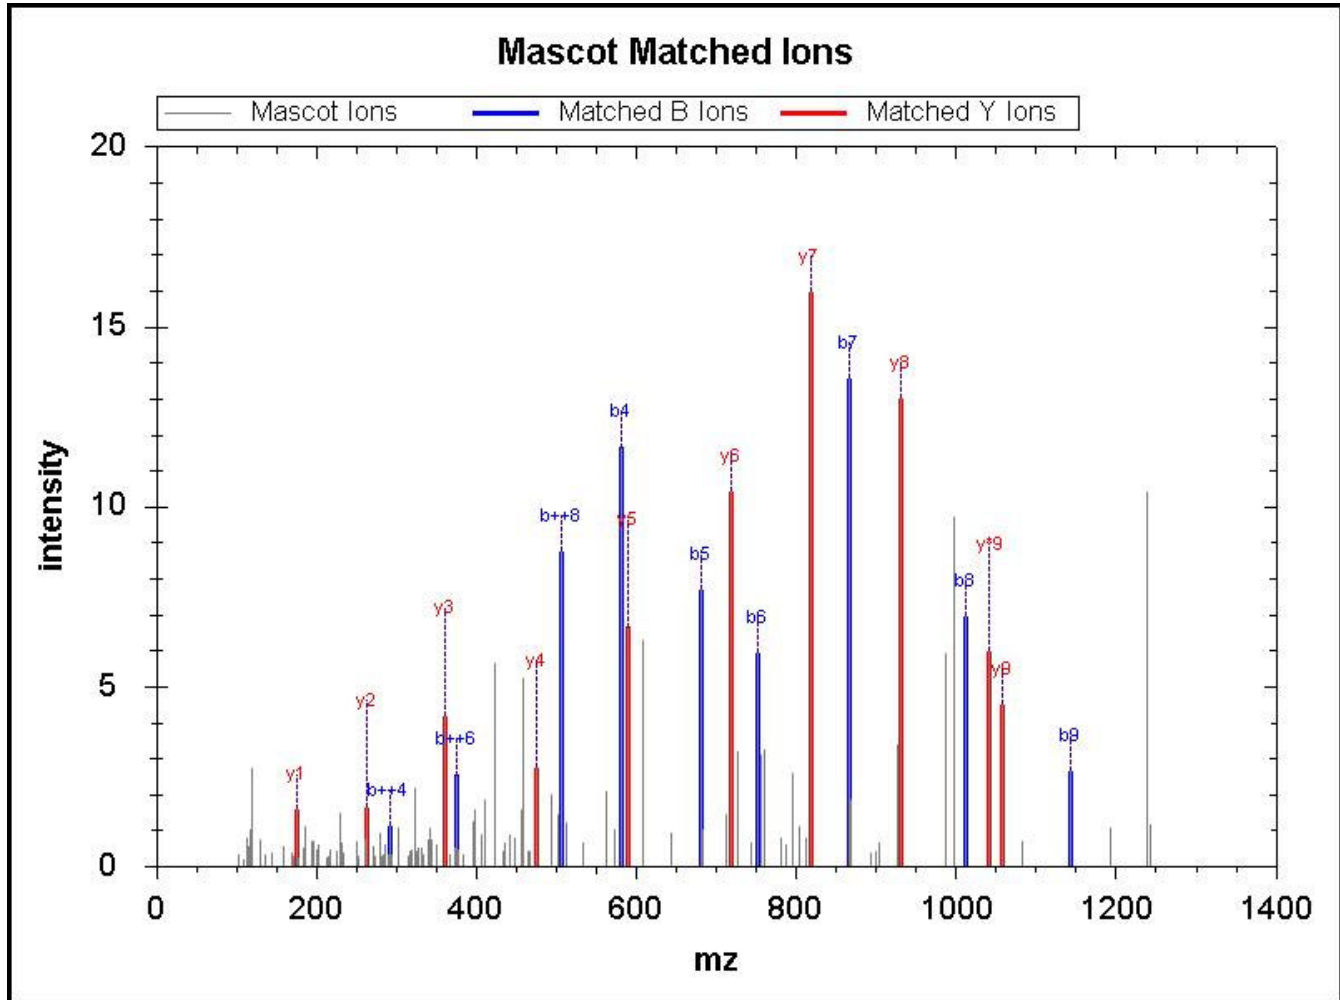

| No | b        | b++    | b*       | b*++   | b0       | b0++   | Seq | y        | y++    | y*       | y*++   | y0       | y0++   | RevNo |
|----|----------|--------|----------|--------|----------|--------|-----|----------|--------|----------|--------|----------|--------|-------|
| 1  | 258.19   | 129.60 |          |        |          |        | L   |          |        |          |        |          |        | 18    |
| 2  | 355.25   | 178.13 |          |        |          |        | P   | 1,943.99 | 972.50 | 1,926.96 | 963.99 | 1,925.98 | 963.49 | 17    |
| 3  | 452.30   | 226.65 |          |        |          |        | P   | 1,846.94 | 923.97 | 1,829.91 | 915.46 | 1,828.93 | 914.97 | 16    |
| 4  | 581.34   | 291.17 |          |        | 563.33   | 282.17 | E   | 1,749.88 | 875.45 | 1,732.86 | 866.93 | 1,731.87 | 866.44 | 15    |
| 5  | 680.41   | 340.71 |          |        | 662.40   | 331.70 | V   | 1,620.84 | 810.92 | 1,603.81 | 802.41 | 1,602.83 | 801.92 | 14    |
| 6  | 751.45   | 376.23 |          |        | 733.44   | 367.22 | A   | 1,521.77 | 761.39 | 1,504.75 | 752.88 | 1,503.76 | 752.38 | 13    |
| 7  | 865.49   | 433.25 | 848.46   | 424.74 | 847.48   | 424.24 | N   | 1,450.74 | 725.87 | 1,433.71 | 717.36 | 1,432.73 | 716.87 | 12    |
| 8  | 1,012.56 | 506.78 | 995.53   | 498.27 | 994.55   | 497.78 | F   | 1,336.69 | 668.85 | 1,319.67 | 660.34 | 1,318.68 | 659.84 | 11    |
| 9  | 1,143.60 | 572.30 | 1,126.57 | 563.79 | 1,125.59 | 563.30 | M   | 1,189.62 | 595.32 | 1,172.60 | 586.80 | 1,171.61 | 586.31 | 10    |
| 10 | 1,271.66 | 636.33 | 1,254.63 | 627.82 | 1,253.65 | 627.33 | Q   | 1,058.58 | 529.80 | 1,041.56 | 521.28 | 1,040.57 | 520.79 | 9     |
| 11 | 1,384.74 | 692.87 | 1,367.72 | 684.36 | 1,366.73 | 683.87 | L   | 930.53   | 465.77 | 913.50   | 457.25 | 912.51   | 456.76 | 8     |
| 12 | 1,483.81 | 742.41 | 1,466.78 | 733.90 | 1,465.80 | 733.40 | V   | 817.44   | 409.22 | 800.41   | 400.71 | 799.43   | 400.22 | 7     |
| 13 | 1,612.85 | 806.93 | 1,595.83 | 798.42 | 1,594.84 | 797.92 | E   | 718.37   | 359.69 | 701.35   | 351.18 | 700.36   | 350.68 | 6     |
| 14 | 1,725.94 | 863.47 | 1,708.91 | 854.96 | 1,707.93 | 854.47 | L   | 589.33   | 295.17 | 572.30   | 286.66 | 571.32   | 286.16 | 5     |
| 15 | 1,840.96 | 920.99 | 1,823.94 | 912.47 | 1,822.95 | 911.98 | D   | 476.25   | 238.63 | 459.22   | 230.11 | 458.24   | 229.62 | 4     |
| 16 | 1,940.03 | 970.52 | 1,923.01 | 962.01 | 1,922.02 | 961.51 | V   | 361.22   | 181.11 | 344.19   | 172.60 | 343.21   | 172.11 | 3     |



|    |          |          |          |          |          |          |   |        |        |        |        |        |        |   |
|----|----------|----------|----------|----------|----------|----------|---|--------|--------|--------|--------|--------|--------|---|
| 17 | 2,027.06 | 1,014.04 | 2,010.04 | 1,005.52 | 2,009.05 | 1,005.03 | S | 262.15 | 131.58 | 245.12 | 123.07 | 244.14 | 122.57 | 2 |
| 18 |          |          |          |          |          |          | R | 175.12 | 88.06  | 158.09 | 79.55  |        |        | 1 |

Query 85667 Hit 1

MS/MS Fragmentation of **TPEDLNTIYSYLHGMEILSNLR**

Found in **sp|Q8TEU7|RPGF6\_HUMAN**, Rap guanine nucleotide exchange factor 6 OS=Homo sapiens GN=RAPGEF6 PE=1 SV=2

Match to Query 85667: 2722.372from(908.4647,3+)

Title: 1118: Sum of 2 scans in range 2538 (rt=66.2348, f=2, i=400) to 2539 (rt=66.2603, f=2, i=401)

[D:\lab212\membrane\GraceJoyce\iTRAQ\_30\_1.raw]

Data File:Submitted from 20120508-1(merge) by Mascot Daemon on JOYCE-VAIO

Monoisotopic mass of neutral peptide Mr(calc): 2722.372

Variable modifications:

Ions Score: 62.57 Expect: 0.001

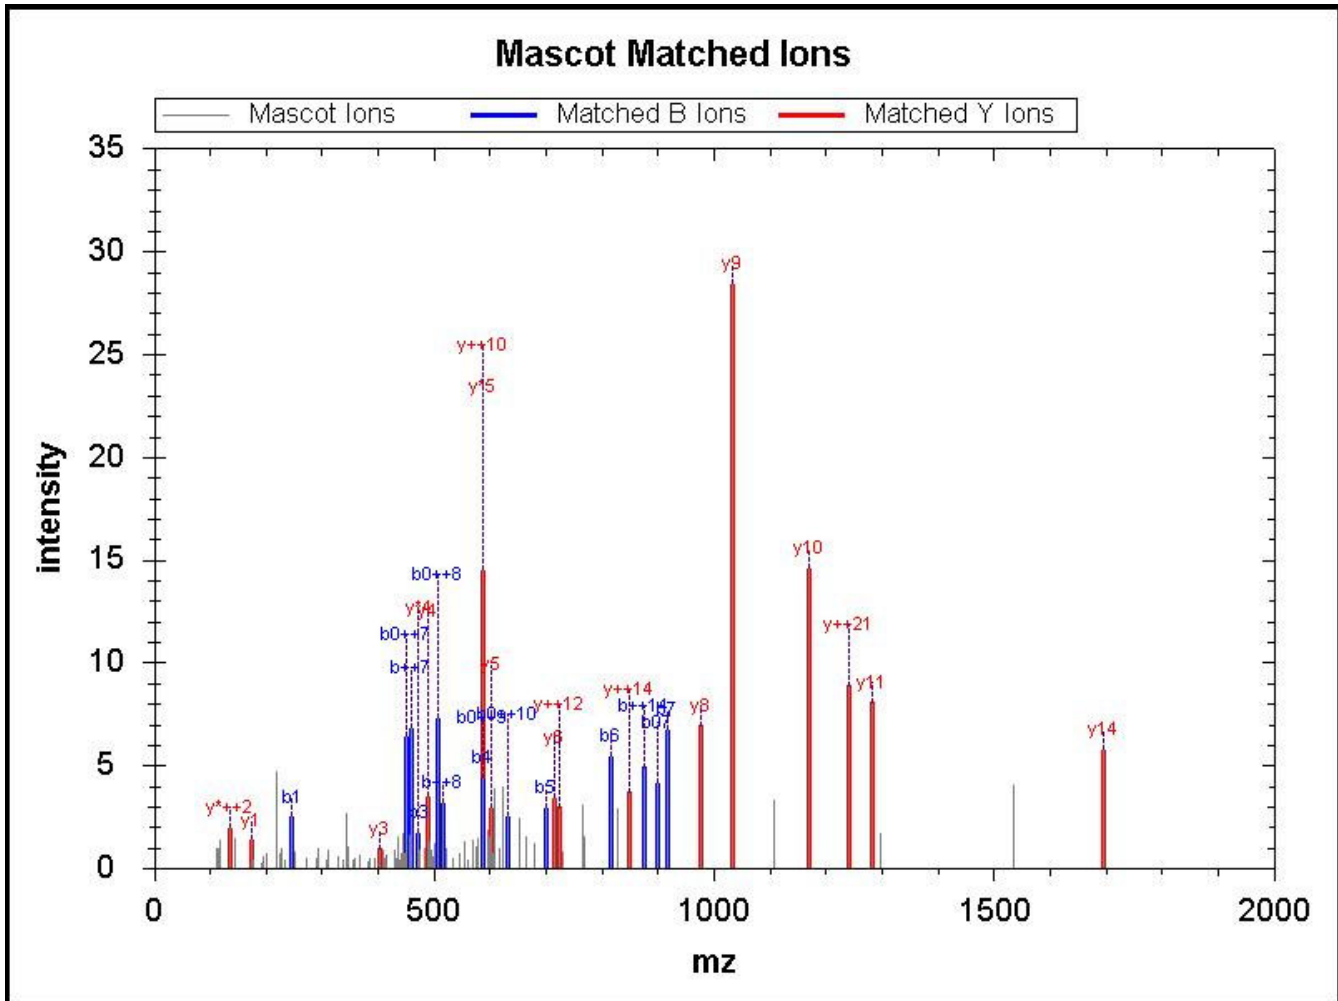

|    |          |          |          |          |          |          |   |        |        |        |        |        |        |   |
|----|----------|----------|----------|----------|----------|----------|---|--------|--------|--------|--------|--------|--------|---|
| 15 | 1,879.90 | 940.45   | 1,862.88 | 931.94   | 1,861.89 | 931.45   | M | 975.53 | 488.27 | 958.50 | 479.75 | 957.52 | 479.26 | 8 |
| 16 | 2,008.94 | 1,004.98 | 1,991.92 | 996.46   | 1,990.93 | 995.97   | E | 844.49 | 422.75 | 827.46 | 414.23 | 826.48 | 413.74 | 7 |
| 17 | 2,122.03 | 1,061.52 | 2,105.00 | 1,053.00 | 2,104.02 | 1,052.51 | I | 715.45 | 358.23 | 698.42 | 349.71 | 697.44 | 349.22 | 6 |
| 18 | 2,235.11 | 1,118.06 | 2,218.09 | 1,109.55 | 2,217.10 | 1,109.05 | L | 602.36 | 301.68 | 585.34 | 293.17 | 584.35 | 292.68 | 5 |
| 19 | 2,322.14 | 1,161.58 | 2,305.12 | 1,153.06 | 2,304.13 | 1,152.57 | S | 489.28 | 245.14 | 472.25 | 236.63 | 471.27 | 236.14 | 4 |
| 20 | 2,436.19 | 1,218.60 | 2,419.16 | 1,210.08 | 2,418.18 | 1,209.59 | N | 402.25 | 201.63 | 385.22 | 193.11 |        |        | 3 |
| 21 | 2,549.27 | 1,275.14 | 2,532.24 | 1,266.63 | 2,531.26 | 1,266.13 | L | 288.20 | 144.61 | 271.18 | 136.09 |        |        | 2 |
| 22 |          |          |          |          |          |          | R | 175.12 | 88.06  | 158.09 | 79.55  |        |        | 1 |

Query 54815 Hit 1

MS/MS Fragmentation of **NPEISHLLNPDIMR**

Found in **sp|Q9UHD9|UBQL2\_HUMAN**, Ubiquilin-2 OS=Homo sapiens GN=UBQLN2 PE=1 SV=2

Match to Query 54815: 1905.989 from (636.3369,3+)

Title: 617: Scan 1414 (rt=41.2579, f=3, i=210) [D:\lab212\membrane\Grace\Joyce\iTRAQ\_35\_2.raw]

Data File: Submitted from 20120508-1(merge) by Mascot Daemon on JOYCE-VAIO

Monoisotopic mass of neutral peptide Mr(calc): 1905.989

Variable modifications:

Ions Score: 62.12 Expect: 0.001

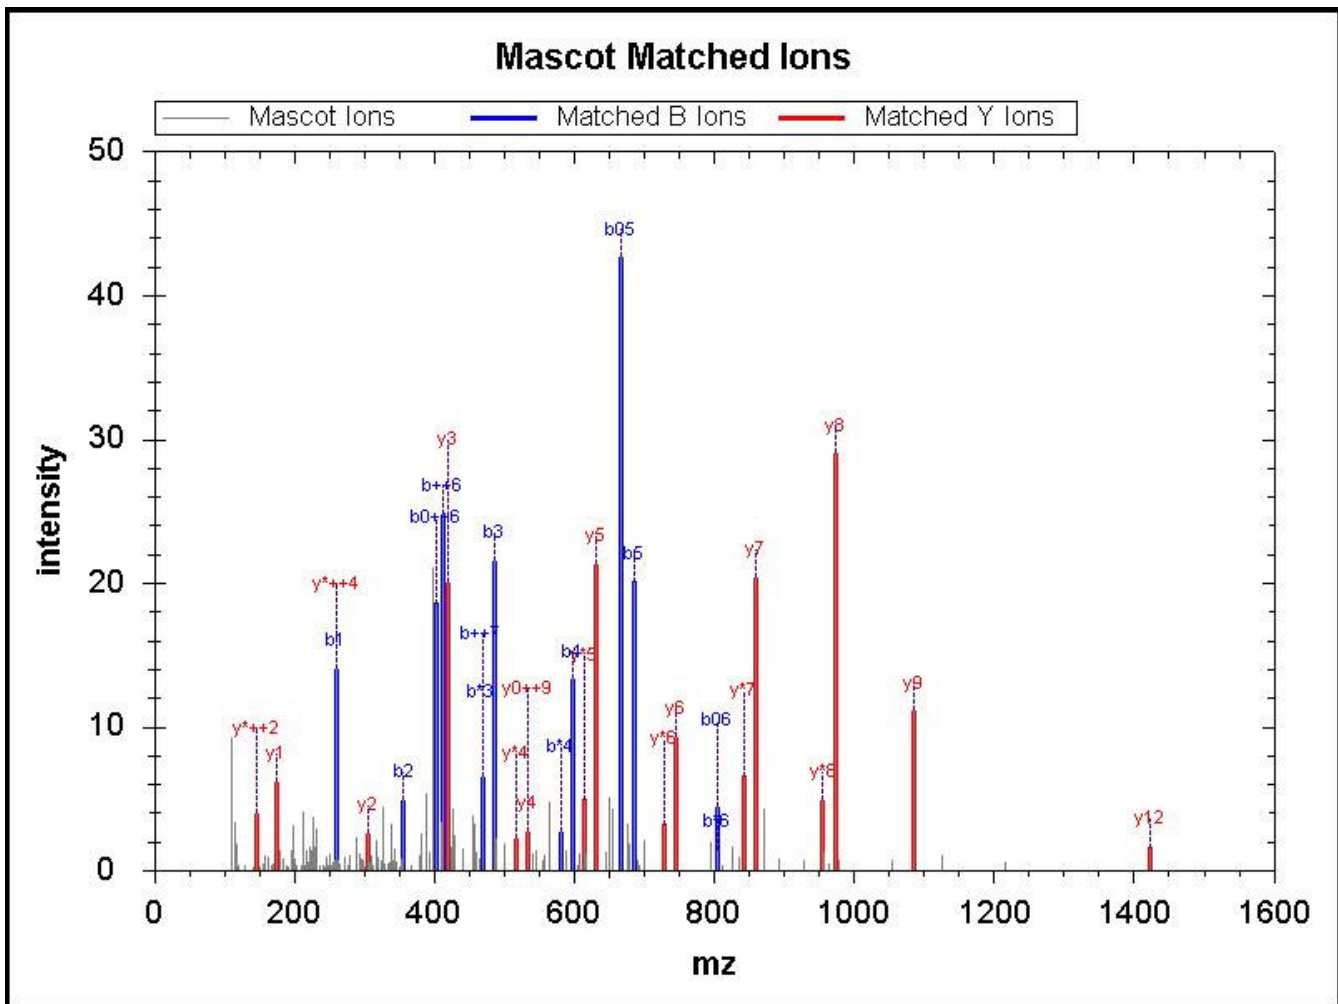

| No | b      | b++    | b*     | b*++   | b0     | b0++   | Seq | y        | y++    | y*       | y*++   | y0       | y0++   | RevNo |
|----|--------|--------|--------|--------|--------|--------|-----|----------|--------|----------|--------|----------|--------|-------|
| 1  | 259.15 | 130.08 | 242.13 | 121.57 |        |        | N   |          |        |          |        |          |        | 15    |
| 2  | 356.21 | 178.61 | 339.18 | 170.09 |        |        | P   | 1,648.85 | 824.93 | 1,631.82 | 816.41 | 1,630.84 | 815.92 | 14    |
| 3  | 485.25 | 243.13 | 468.22 | 234.61 | 467.24 | 234.12 | E   | 1,551.79 | 776.40 | 1,534.77 | 767.89 | 1,533.78 | 767.40 | 13    |
| 4  | 598.33 | 299.67 | 581.31 | 291.16 | 580.32 | 290.66 | I   | 1,422.75 | 711.88 | 1,405.73 | 703.37 | 1,404.74 | 702.87 | 12    |
| 5  | 685.36 | 343.19 | 668.34 | 334.67 | 667.35 | 334.18 | S   | 1,309.67 | 655.34 | 1,292.64 | 646.82 | 1,291.66 | 646.33 | 11    |
| 6  | 822.42 | 411.71 | 805.40 | 403.20 | 804.41 | 402.71 | H   | 1,222.64 | 611.82 | 1,205.61 | 603.31 | 1,204.63 | 602.82 | 10    |

|    |          |        |          |        |          |        |   |          |        |          |        |          |        |   |
|----|----------|--------|----------|--------|----------|--------|---|----------|--------|----------|--------|----------|--------|---|
| 7  | 935.51   | 468.26 | 918.48   | 459.74 | 917.50   | 459.25 | L | 1,085.58 | 543.29 | 1,068.55 | 534.78 | 1,067.57 | 534.29 | 9 |
| 8  | 1,048.59 | 524.80 | 1,031.56 | 516.29 | 1,030.58 | 515.79 | L | 972.49   | 486.75 | 955.47   | 478.24 | 954.48   | 477.74 | 8 |
| 9  | 1,162.63 | 581.82 | 1,145.61 | 573.31 | 1,144.62 | 572.82 | N | 859.41   | 430.21 | 842.38   | 421.69 | 841.40   | 421.20 | 7 |
| 10 | 1,276.68 | 638.84 | 1,259.65 | 630.33 | 1,258.67 | 629.84 | N | 745.37   | 373.19 | 728.34   | 364.67 | 727.36   | 364.18 | 6 |
| 11 | 1,373.73 | 687.37 | 1,356.70 | 678.86 | 1,355.72 | 678.36 | P | 631.32   | 316.17 | 614.30   | 307.65 | 613.31   | 307.16 | 5 |
| 12 | 1,488.76 | 744.88 | 1,471.73 | 736.37 | 1,470.75 | 735.88 | D | 534.27   | 267.64 | 517.24   | 259.13 | 516.26   | 258.63 | 4 |
| 13 | 1,601.84 | 801.42 | 1,584.81 | 792.91 | 1,583.83 | 792.42 | I | 419.24   | 210.13 | 402.22   | 201.61 |          |        | 3 |
| 14 | 1,732.88 | 866.94 | 1,715.85 | 858.43 | 1,714.87 | 857.94 | M | 306.16   | 153.58 | 289.13   | 145.07 |          |        | 2 |
| 15 |          |        |          |        |          |        | R | 175.12   | 88.06  | 158.09   | 79.55  |          |        | 1 |

Query 65641 Hit 1

MS/MS Fragmentation of **EVFLPSTPGLGMHVEVK**

Found in **sp|Q7Z7H5|TMED4\_HUMAN**, Transmembrane emp24 domain-containing protein 4 OS=Homo sapiens GN=TMED4 PE=1 SV=1

Match to Query 65641: 2127.164from(710.0618,3+)

Title: 687: Sum of 2 scans in range 1562 (rt=44.5722, f=4, i=461) to 1563 (rt=44.5976, f=4, i=462)

[D:\lab212\membrane\GraceJoyce\iTRAQ\_35\_1.raw]

Data File: Submitted from 20120508-1(merge) by Mascot Daemon on JOYCE-VAIO

Monoisotopic mass of neutral peptide Mr(calc): 2127.164

Variable modifications:

K17 iTRAQ4plex (K)

Ions Score: 61.78 Expect: 0.000

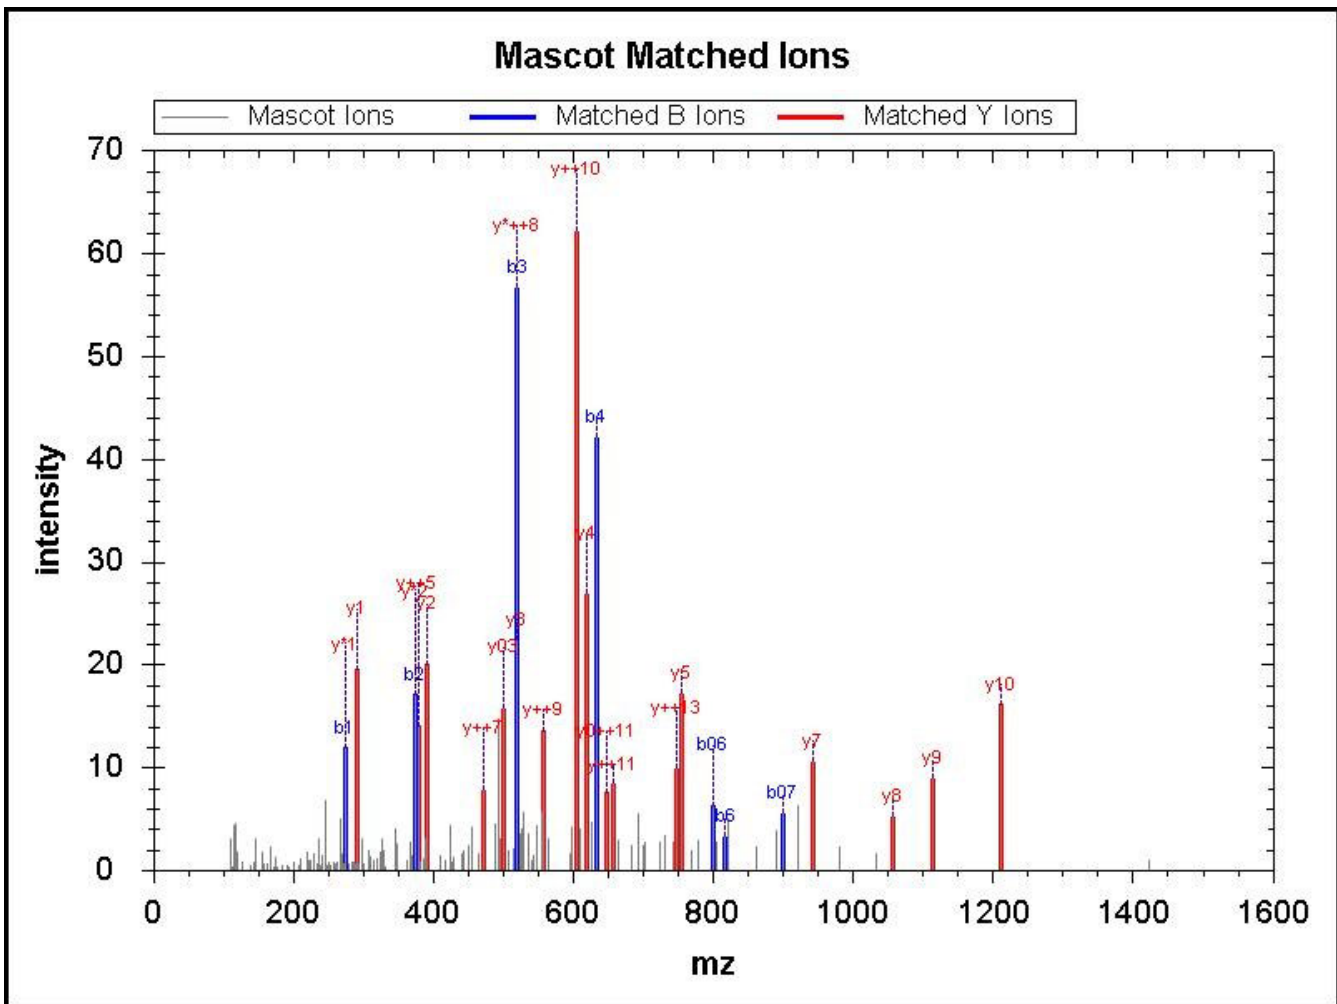

| No | b      | b++    | b0     | b0++   | Seq | y        | y++    | y*       | y*++   | y0       | y0++   | RevNo |
|----|--------|--------|--------|--------|-----|----------|--------|----------|--------|----------|--------|-------|
| 1  | 274.15 | 137.58 | 256.14 | 128.57 | E   |          |        |          |        |          |        | 17    |
| 2  | 373.22 | 187.11 | 355.21 | 178.11 | V   | 1,855.03 | 928.02 | 1,838.00 | 919.50 | 1,837.02 | 919.01 | 16    |

|    |          |        |          |        |   |          |        |          |        |          |        |    |
|----|----------|--------|----------|--------|---|----------|--------|----------|--------|----------|--------|----|
| 3  | 520.29   | 260.65 | 502.28   | 251.64 | F | 1,755.96 | 878.48 | 1,738.93 | 869.97 | 1,737.95 | 869.48 | 15 |
| 4  | 633.37   | 317.19 | 615.36   | 308.18 | L | 1,608.89 | 804.95 | 1,591.86 | 796.44 | 1,590.88 | 795.94 | 14 |
| 5  | 730.43   | 365.72 | 712.42   | 356.71 | P | 1,495.81 | 748.41 | 1,478.78 | 739.89 | 1,477.80 | 739.40 | 13 |
| 6  | 817.46   | 409.23 | 799.45   | 400.23 | S | 1,398.75 | 699.88 | 1,381.73 | 691.37 | 1,380.74 | 690.87 | 12 |
| 7  | 918.51   | 459.76 | 900.49   | 450.75 | T | 1,311.72 | 656.36 | 1,294.69 | 647.85 | 1,293.71 | 647.36 | 11 |
| 8  | 1,015.56 | 508.28 | 997.55   | 499.28 | P | 1,210.67 | 605.84 | 1,193.65 | 597.33 | 1,192.66 | 596.84 | 10 |
| 9  | 1,072.58 | 536.79 | 1,054.57 | 527.79 | G | 1,113.62 | 557.31 | 1,096.59 | 548.80 | 1,095.61 | 548.31 | 9  |
| 10 | 1,185.66 | 593.34 | 1,167.65 | 584.33 | L | 1,056.60 | 528.80 | 1,039.57 | 520.29 | 1,038.59 | 519.80 | 8  |
| 11 | 1,242.69 | 621.85 | 1,224.67 | 612.84 | G | 943.52   | 472.26 | 926.49   | 463.75 | 925.50   | 463.26 | 7  |
| 12 | 1,373.73 | 687.37 | 1,355.72 | 678.36 | M | 886.49   | 443.75 | 869.47   | 435.24 | 868.48   | 434.75 | 6  |
| 13 | 1,510.78 | 755.90 | 1,492.77 | 746.89 | H | 755.45   | 378.23 | 738.43   | 369.72 | 737.44   | 369.22 | 5  |
| 14 | 1,609.85 | 805.43 | 1,591.84 | 796.42 | V | 618.39   | 309.70 | 601.37   | 301.19 | 600.38   | 300.70 | 4  |
| 15 | 1,738.90 | 869.95 | 1,720.89 | 860.95 | E | 519.33   | 260.17 | 502.30   | 251.65 | 501.32   | 251.16 | 3  |
| 16 | 1,837.96 | 919.49 | 1,819.95 | 910.48 | V | 390.28   | 195.65 | 373.26   | 187.13 |          |        | 2  |
| 17 |          |        |          |        | K | 291.21   | 146.11 | 274.19   | 137.60 |          |        | 1  |

Query 69569 Hit 1

MS/MS Fragmentation of **EVEVQLLPELEEMILHR**

Found in **sp|Q14667|K0100\_HUMAN**, UPF0378 protein KIAA0100 OS=Homo sapiens GN=KIAA0100 PE=1 SV=3

Match to Query 69569: 2220.195from(741.0722,3+)

Title: 1137: Sum of 2 scans in range 2624 (rt=68.0281, f=2, i=432) to 2625 (rt=68.0535, f=2, i=433)

[D:\lab212\membrane\GraceJoyce\TRAQ\_30\_2.raw]

Data File: Submitted from 20120508-1(merge) by Mascot Daemon on JOYCE-VAIO

Monoisotopic mass of neutral peptide Mr(calc): 2220.195

Variable modifications:

Ions Score: 61.77 Expect: 0.001

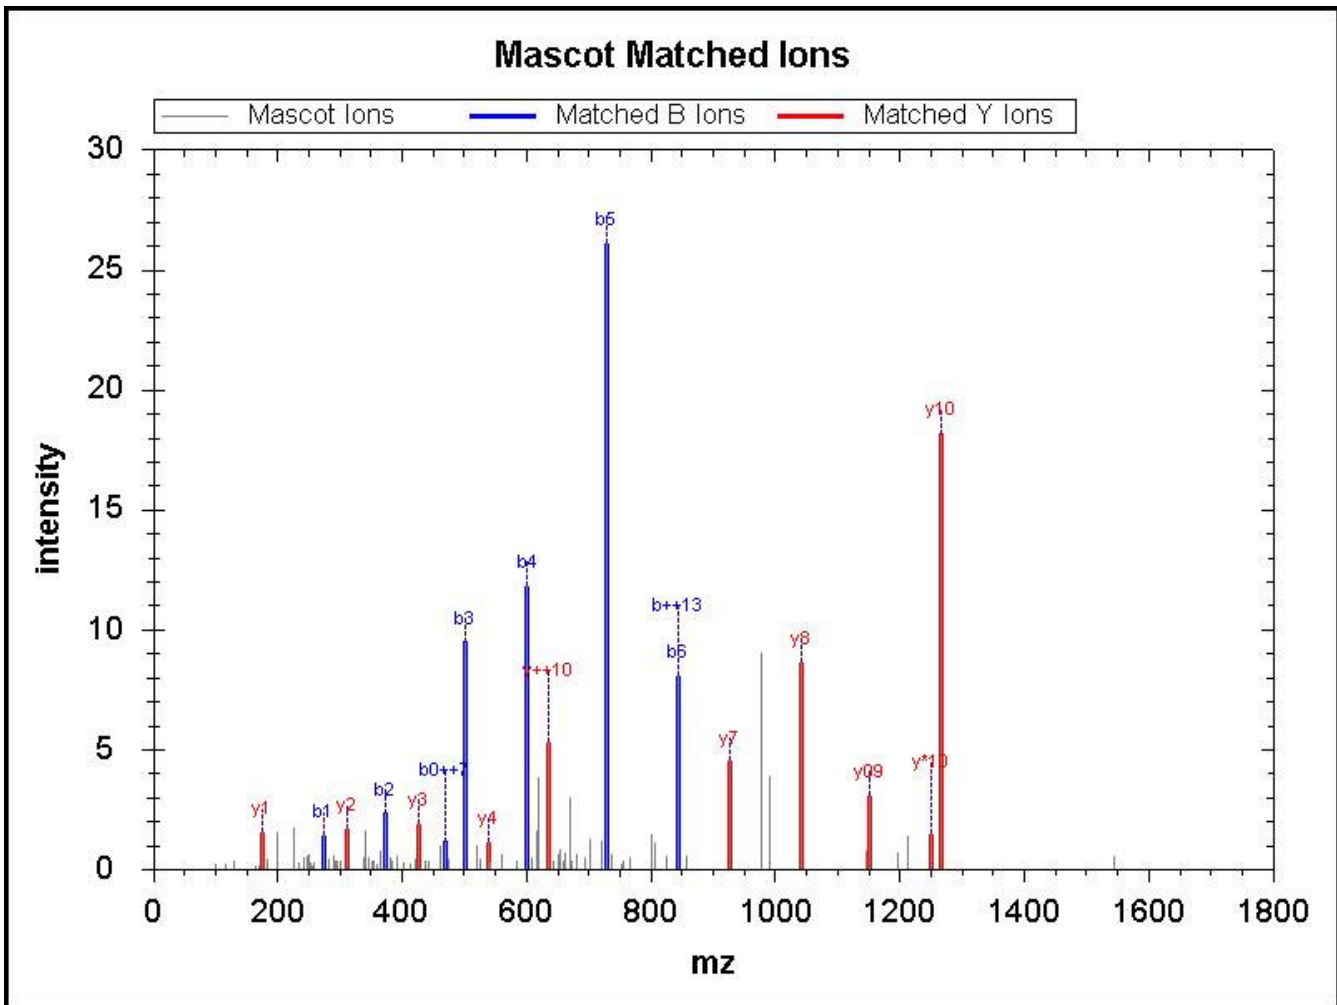

| No | b        | b++      | b*       | b*++     | b0       | b0++     | Seq | y        | y++    | y*       | y*++   | y0       | y0++   | RevNo |
|----|----------|----------|----------|----------|----------|----------|-----|----------|--------|----------|--------|----------|--------|-------|
| 1  | 274.15   | 137.58   |          |          | 256.14   | 128.57   | E   |          |        |          |        |          |        | 17    |
| 2  | 373.22   | 187.11   |          |          | 355.21   | 178.11   | V   | 1,948.06 | 974.53 | 1,931.03 | 966.02 | 1,930.05 | 965.53 | 16    |
| 3  | 502.26   | 251.64   |          |          | 484.25   | 242.63   | E   | 1,848.99 | 925.00 | 1,831.96 | 916.48 | 1,830.98 | 915.99 | 15    |
| 4  | 601.33   | 301.17   |          |          | 583.32   | 292.16   | V   | 1,719.95 | 860.48 | 1,702.92 | 851.96 | 1,701.94 | 851.47 | 14    |
| 5  | 729.39   | 365.20   | 712.36   | 356.69   | 711.38   | 356.19   | Q   | 1,620.88 | 810.94 | 1,603.85 | 802.43 | 1,602.87 | 801.94 | 13    |
| 6  | 842.47   | 421.74   | 825.45   | 413.23   | 824.46   | 412.74   | L   | 1,492.82 | 746.91 | 1,475.79 | 738.40 | 1,474.81 | 737.91 | 12    |
| 7  | 955.56   | 478.28   | 938.53   | 469.77   | 937.55   | 469.28   | L   | 1,379.74 | 690.37 | 1,362.71 | 681.86 | 1,361.72 | 681.37 | 11    |
| 8  | 1,052.61 | 526.81   | 1,035.58 | 518.30   | 1,034.60 | 517.80   | P   | 1,266.65 | 633.83 | 1,249.62 | 625.32 | 1,248.64 | 624.82 | 10    |
| 9  | 1,181.65 | 591.33   | 1,164.63 | 582.82   | 1,163.64 | 582.33   | E   | 1,169.60 | 585.30 | 1,152.57 | 576.79 | 1,151.59 | 576.30 | 9     |
| 10 | 1,294.74 | 647.87   | 1,277.71 | 639.36   | 1,276.73 | 638.87   | L   | 1,040.56 | 520.78 | 1,023.53 | 512.27 | 1,022.55 | 511.78 | 8     |
| 11 | 1,423.78 | 712.39   | 1,406.75 | 703.88   | 1,405.77 | 703.39   | E   | 927.47   | 464.24 | 910.45   | 455.73 | 909.46   | 455.23 | 7     |
| 12 | 1,552.82 | 776.92   | 1,535.80 | 768.40   | 1,534.81 | 767.91   | E   | 798.43   | 399.72 | 781.40   | 391.20 | 780.42   | 390.71 | 6     |
| 13 | 1,683.86 | 842.44   | 1,666.84 | 833.92   | 1,665.85 | 833.43   | M   | 669.39   | 335.20 | 652.36   | 326.68 |          |        | 5     |
| 14 | 1,796.95 | 898.98   | 1,779.92 | 890.46   | 1,778.94 | 889.97   | I   | 538.35   | 269.68 | 521.32   | 261.16 |          |        | 4     |
| 15 | 1,910.03 | 955.52   | 1,893.01 | 947.01   | 1,892.02 | 946.51   | L   | 425.26   | 213.13 | 408.24   | 204.62 |          |        | 3     |
| 16 | 2,047.09 | 1,024.05 | 2,030.06 | 1,015.54 | 2,029.08 | 1,015.04 | H   | 312.18   | 156.59 | 295.15   | 148.08 |          |        | 2     |
| 17 |          |          |          |          |          |          | R   | 175.12   | 88.06  | 158.09   | 79.55  |          |        | 1     |

Query 62282 Hit 1

MS/MS Fragmentation of **TFTDHMLMVEWNDK**

Found in **sp|O15382|BCAT2\_HUMAN**, Branched-chain-amino-acid aminotransferase

Match to Query 62282: 2053.991 from (685.6708, 3+)

Title: 758: Scan 1665 (rt=47.2806, f=2, i=267) [D:\lab212\membrane\Grace\Joyce\iTRAQ\_42\_2.raw]

Data File: Submitted from 20120508-1 (merge) by Mascot Daemon on JOYCE-VAIO

Monoisotopic mass of neutral peptide Mr(calc): 2053.991

Variable modifications:  
 K14 iTRAQ4plex (K)  
 Ions Score: 61.62 Expect: 0.001

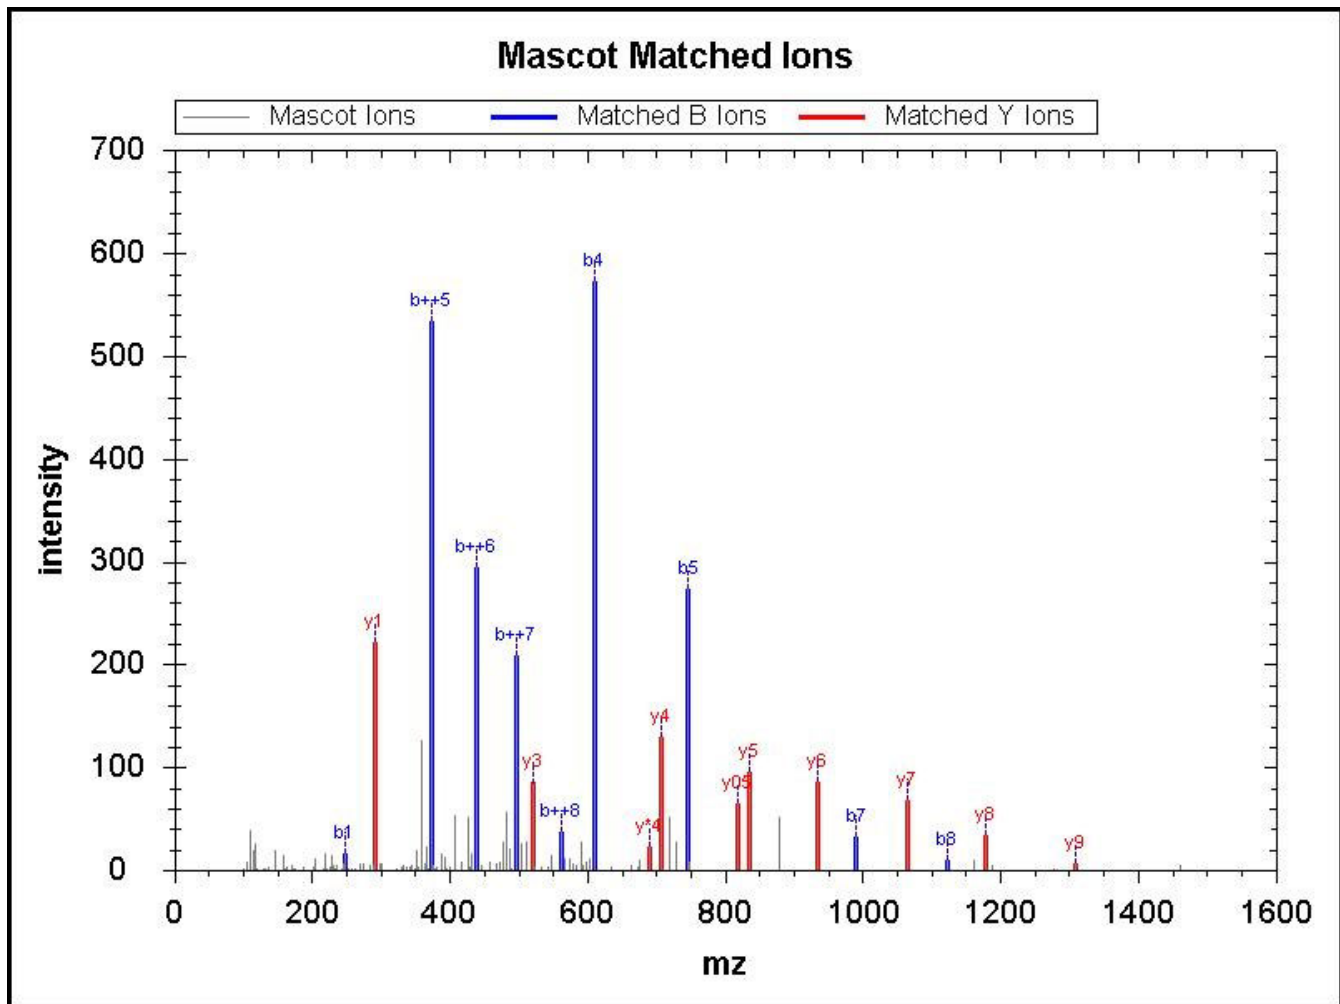

| No | b        | b++    | b*       | b*++   | b0       | b0++   | Seq | y        | y++    | y*       | y*++   | y0       | y0++   | RevNo |
|----|----------|--------|----------|--------|----------|--------|-----|----------|--------|----------|--------|----------|--------|-------|
| 1  | 246.16   | 123.58 |          |        | 228.15   | 114.58 | T   |          |        |          |        |          |        | 14    |
| 2  | 393.23   | 197.12 |          |        | 375.21   | 188.11 | F   | 1,809.84 | 905.42 | 1,792.82 | 896.91 | 1,791.83 | 896.42 | 13    |
| 3  | 494.27   | 247.64 |          |        | 476.26   | 238.63 | T   | 1,662.77 | 831.89 | 1,645.75 | 823.38 | 1,644.76 | 822.89 | 12    |
| 4  | 609.30   | 305.15 |          |        | 591.29   | 296.15 | D   | 1,561.73 | 781.37 | 1,544.70 | 772.85 | 1,543.72 | 772.36 | 11    |
| 5  | 746.36   | 373.68 |          |        | 728.35   | 364.68 | H   | 1,446.70 | 723.85 | 1,429.67 | 715.34 | 1,428.69 | 714.85 | 10    |
| 6  | 877.40   | 439.20 |          |        | 859.39   | 430.20 | M   | 1,309.64 | 655.32 | 1,292.61 | 646.81 | 1,291.63 | 646.32 | 9     |
| 7  | 990.48   | 495.75 |          |        | 972.47   | 486.74 | L   | 1,178.60 | 589.80 | 1,161.57 | 581.29 | 1,160.59 | 580.80 | 8     |
| 8  | 1,121.52 | 561.27 |          |        | 1,103.51 | 552.26 | M   | 1,065.52 | 533.26 | 1,048.49 | 524.75 | 1,047.50 | 524.26 | 7     |
| 9  | 1,220.59 | 610.80 |          |        | 1,202.58 | 601.79 | V   | 934.48   | 467.74 | 917.45   | 459.23 | 916.46   | 458.74 | 6     |
| 10 | 1,349.64 | 675.32 |          |        | 1,331.62 | 666.32 | E   | 835.41   | 418.21 | 818.38   | 409.69 | 817.40   | 409.20 | 5     |
| 11 | 1,535.71 | 768.36 |          |        | 1,517.70 | 759.36 | W   | 706.36   | 353.69 | 689.34   | 345.17 | 688.35   | 344.68 | 4     |
| 12 | 1,649.76 | 825.38 | 1,632.73 | 816.87 | 1,631.75 | 816.38 | N   | 520.28   | 260.65 | 503.26   | 252.13 | 502.27   | 251.64 | 3     |
| 13 | 1,764.78 | 882.90 | 1,747.76 | 874.38 | 1,746.77 | 873.89 | D   | 406.24   | 203.62 | 389.22   | 195.11 | 388.23   | 194.62 | 2     |
| 14 |          |        |          |        |          |        | K   | 291.21   | 146.11 | 274.19   | 137.60 |          |        | 1     |

Query 97565 Hit 1

MS/MS Fragmentation of **WYQADSPADLLLTEEEFLSFLHPEHSR**

Found in **sp|Q9BRK5|CAB45\_HUMAN**, 45 kDa calcium-binding protein OS=Homo sapiens GN=SDF4 PE=1 SV=1

Match to Query 97565: 3470.694from(868.6807,4+)

Title: 1303: Sum of 2 scans in range 2918 (rt=75.0288, f=4, i=847) to 2919 (rt=75.0542, f=4, i=848)

[D:\lab212\membrane\GraceJoyce\iTRAQ\_39\_2.raw]

Data File:Submitted from 20120508-1(merge) by Mascot Daemon on JOYCE-VAIO

Monoisotopic mass of neutral peptide Mr(calc): 3470.694

Variable modifications:

Ions Score: 61.61 Expect: 0.001

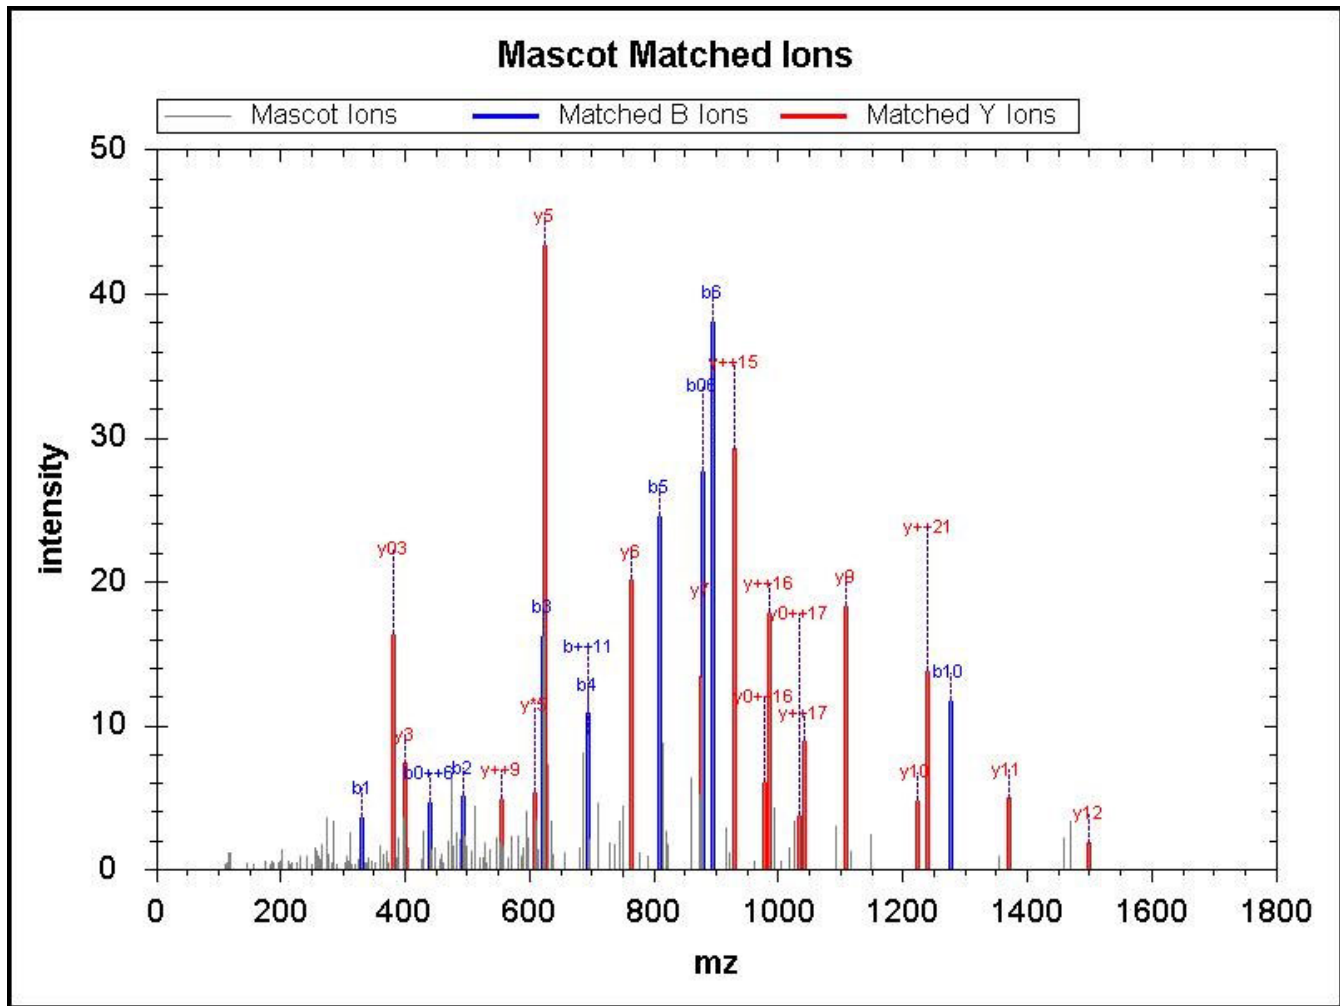

| No | b        | b++      | b*       | b*++     | b0       | b0++     | Seq | y        | y++      | y*       | y*++     | y0       | y0++     | RevNo |
|----|----------|----------|----------|----------|----------|----------|-----|----------|----------|----------|----------|----------|----------|-------|
| 1  | 331.19   | 166.10   |          |          |          |          | W   |          |          |          |          |          |          | 28    |
| 2  | 494.25   | 247.63   |          |          |          |          | Y   | 3,141.52 | 1,571.26 | 3,124.49 | 1,562.75 | 3,123.51 | 1,562.26 | 27    |
| 3  | 622.31   | 311.66   | 605.28   | 303.15   |          |          | Q   | 2,978.45 | 1,489.73 | 2,961.43 | 1,481.22 | 2,960.44 | 1,480.72 | 26    |
| 4  | 693.35   | 347.18   | 676.32   | 338.66   |          |          | A   | 2,850.39 | 1,425.70 | 2,833.37 | 1,417.19 | 2,832.38 | 1,416.70 | 25    |
| 5  | 808.37   | 404.69   | 791.35   | 396.18   | 790.36   | 395.69   | D   | 2,779.36 | 1,390.18 | 2,762.33 | 1,381.67 | 2,761.35 | 1,381.18 | 24    |
| 6  | 895.41   | 448.21   | 878.38   | 439.69   | 877.40   | 439.20   | S   | 2,664.33 | 1,332.67 | 2,647.30 | 1,324.16 | 2,646.32 | 1,323.66 | 23    |
| 7  | 992.46   | 496.73   | 975.43   | 488.22   | 974.45   | 487.73   | P   | 2,577.30 | 1,289.15 | 2,560.27 | 1,280.64 | 2,559.29 | 1,280.15 | 22    |
| 8  | 1,089.51 | 545.26   | 1,072.49 | 536.75   | 1,071.50 | 536.25   | P   | 2,480.25 | 1,240.63 | 2,463.22 | 1,232.11 | 2,462.24 | 1,231.62 | 21    |
| 9  | 1,160.55 | 580.78   | 1,143.52 | 572.27   | 1,142.54 | 571.77   | A   | 2,383.19 | 1,192.10 | 2,366.17 | 1,183.59 | 2,365.18 | 1,183.09 | 20    |
| 10 | 1,275.58 | 638.29   | 1,258.55 | 629.78   | 1,257.57 | 629.29   | D   | 2,312.16 | 1,156.58 | 2,295.13 | 1,148.07 | 2,294.15 | 1,147.58 | 19    |
| 11 | 1,388.66 | 694.83   | 1,371.63 | 686.32   | 1,370.65 | 685.83   | L   | 2,197.13 | 1,099.07 | 2,180.10 | 1,090.55 | 2,179.12 | 1,090.06 | 18    |
| 12 | 1,501.74 | 751.38   | 1,484.72 | 742.86   | 1,483.73 | 742.37   | L   | 2,084.04 | 1,042.53 | 2,067.02 | 1,034.01 | 2,066.03 | 1,033.52 | 17    |
| 13 | 1,614.83 | 807.92   | 1,597.80 | 799.40   | 1,596.82 | 798.91   | L   | 1,970.96 | 985.98   | 1,953.93 | 977.47   | 1,952.95 | 976.98   | 16    |
| 14 | 1,715.88 | 858.44   | 1,698.85 | 849.93   | 1,697.87 | 849.44   | T   | 1,857.88 | 929.44   | 1,840.85 | 920.93   | 1,839.87 | 920.44   | 15    |
| 15 | 1,844.92 | 922.96   | 1,827.89 | 914.45   | 1,826.91 | 913.96   | E   | 1,756.83 | 878.92   | 1,739.80 | 870.40   | 1,738.82 | 869.91   | 14    |
| 16 | 1,973.96 | 987.48   | 1,956.94 | 978.97   | 1,955.95 | 978.48   | E   | 1,627.79 | 814.40   | 1,610.76 | 805.88   | 1,609.78 | 805.39   | 13    |
| 17 | 2,103.00 | 1,052.01 | 2,085.98 | 1,043.49 | 2,084.99 | 1,043.00 | E   | 1,498.74 | 749.88   | 1,481.72 | 741.36   | 1,480.73 | 740.87   | 12    |
| 18 | 2,250.07 | 1,125.54 | 2,233.05 | 1,117.03 | 2,232.06 | 1,116.53 | F   | 1,369.70 | 685.35   | 1,352.67 | 676.84   | 1,351.69 | 676.35   | 11    |
| 19 | 2,363.16 | 1,182.08 | 2,346.13 | 1,173.57 | 2,345.15 | 1,173.08 | L   | 1,222.63 | 611.82   | 1,205.61 | 603.31   | 1,204.62 | 602.81   | 10    |
| 20 | 2,450.19 | 1,225.60 | 2,433.16 | 1,217.08 | 2,432.18 | 1,216.59 | S   | 1,109.55 | 555.28   | 1,092.52 | 546.76   | 1,091.54 | 546.27   | 9     |



|    |          |          |          |          |          |          |   |          |        |          |        |          |        |   |
|----|----------|----------|----------|----------|----------|----------|---|----------|--------|----------|--------|----------|--------|---|
| 21 | 2,597.26 | 1,299.13 | 2,580.23 | 1,290.62 | 2,579.25 | 1,290.13 | F | 1,022.52 | 511.76 | 1,005.49 | 503.25 | 1,004.51 | 502.76 | 8 |
| 22 | 2,710.34 | 1,355.67 | 2,693.31 | 1,347.16 | 2,692.33 | 1,346.67 | L | 875.45   | 438.23 | 858.42   | 429.71 | 857.44   | 429.22 | 7 |
| 23 | 2,847.40 | 1,424.20 | 2,830.37 | 1,415.69 | 2,829.39 | 1,415.20 | H | 762.36   | 381.69 | 745.34   | 373.17 | 744.35   | 372.68 | 6 |
| 24 | 2,944.45 | 1,472.73 | 2,927.43 | 1,464.22 | 2,926.44 | 1,463.72 | P | 625.31   | 313.16 | 608.28   | 304.64 | 607.29   | 304.15 | 5 |
| 25 | 3,073.49 | 1,537.25 | 3,056.47 | 1,528.74 | 3,055.48 | 1,528.25 | E | 528.25   | 264.63 | 511.23   | 256.12 | 510.24   | 255.62 | 4 |
| 26 | 3,210.55 | 1,605.78 | 3,193.53 | 1,597.27 | 3,192.54 | 1,596.78 | H | 399.21   | 200.11 | 382.18   | 191.60 | 381.20   | 191.10 | 3 |
| 27 | 3,297.59 | 1,649.30 | 3,280.56 | 1,640.78 | 3,279.58 | 1,640.29 | S | 262.15   | 131.58 | 245.12   | 123.07 | 244.14   | 122.57 | 2 |
| 28 |          |          |          |          |          |          | R | 175.12   | 88.06  | 158.09   | 79.55  |          |        | 1 |

Query 27994 Hit 1

MS/MS Fragmentation of **SVIDYQTHFR**

Found in **sp|Q9Y3B3|TMED7\_HUMAN**, Transmembrane emp24 domain-containing protein 7 OS=Homo sapiens GN=TMED7 PE=1 SV=2

Match to Query 27994: 1408.724from(470.5819,3+)

Title: 403: Scan 921 (rt=30.424, f=2, i=148) [D:\lab212\membrane\GraceJoyce\iTRAQ\_40\_1.raw]

Data File:Submitted from 20120508-1(merge) by Mascot Daemon on JOYCE-VAIO

Monoisotopic mass of neutral peptide Mr(calc): 1408.724

Variable modifications:

Ions Score: 61.6 Expect: 0.001

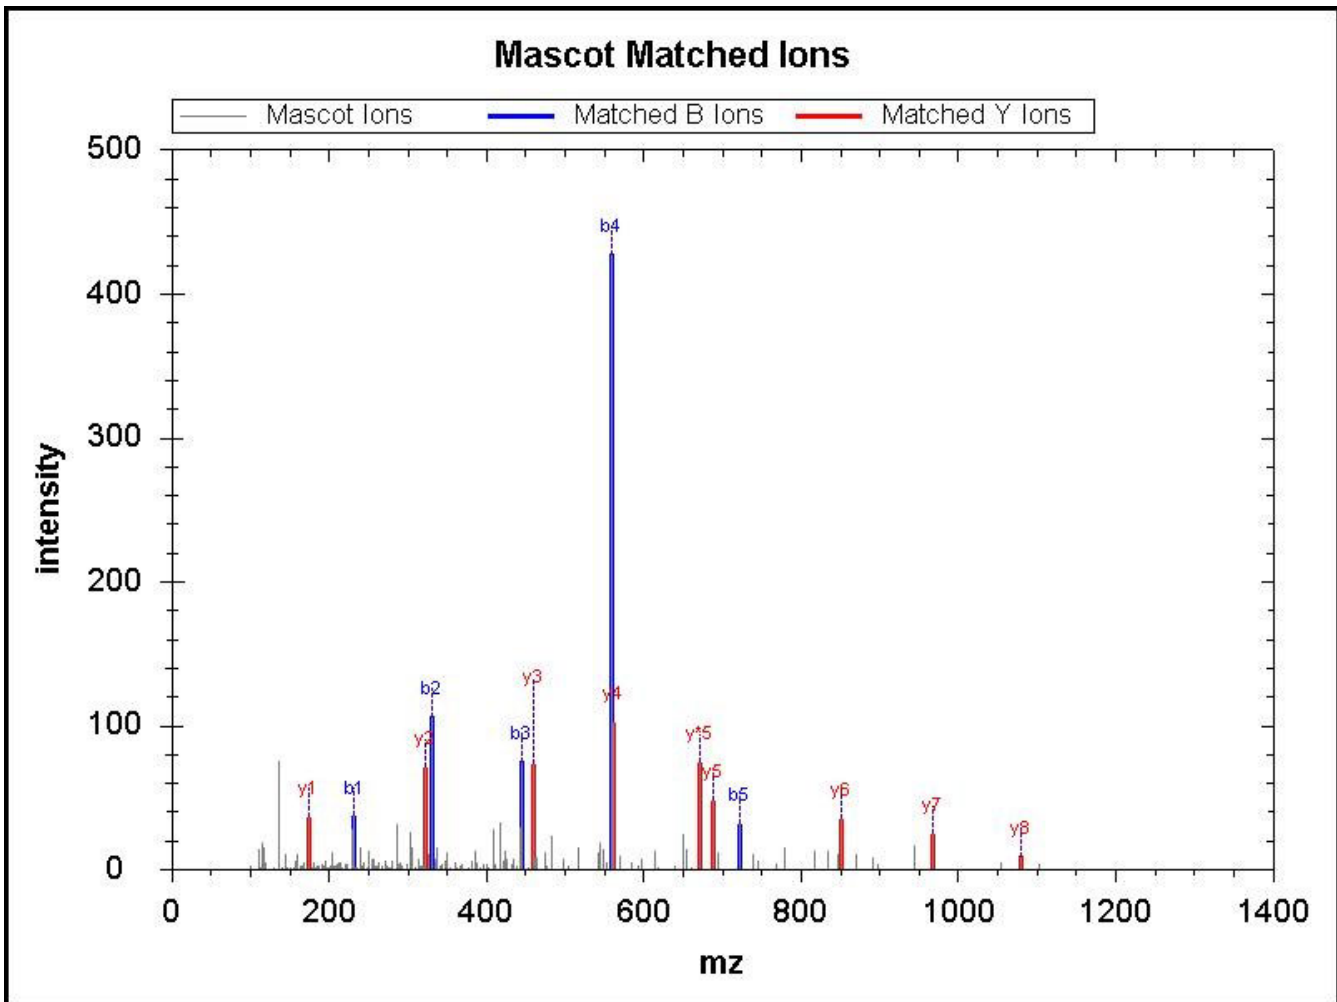

| No | b      | b++    | b*     | b*++   | b0     | b0++   | Seq | y        | y++    | y*       | y*++   | y0       | y0++   | RevNo |
|----|--------|--------|--------|--------|--------|--------|-----|----------|--------|----------|--------|----------|--------|-------|
| 1  | 232.14 | 116.57 |        |        | 214.13 | 107.57 | S   |          |        |          |        |          |        | 10    |
| 2  | 331.21 | 166.11 |        |        | 313.20 | 157.10 | V   | 1,178.60 | 589.80 | 1,161.57 | 581.29 | 1,160.58 | 580.80 | 9     |
| 3  | 444.29 | 222.65 |        |        | 426.28 | 213.65 | I   | 1,079.53 | 540.27 | 1,062.50 | 531.75 | 1,061.52 | 531.26 | 8     |
| 4  | 559.32 | 280.16 |        |        | 541.31 | 271.16 | D   | 966.44   | 483.73 | 949.42   | 475.21 | 948.43   | 474.72 | 7     |
| 5  | 722.38 | 361.70 |        |        | 704.37 | 352.69 | Y   | 851.42   | 426.21 | 834.39   | 417.70 | 833.41   | 417.21 | 6     |
| 6  | 850.44 | 425.72 | 833.42 | 417.21 | 832.43 | 416.72 | Q   | 688.35   | 344.68 | 671.33   | 336.17 | 670.34   | 335.67 | 5     |

|    |          |        |          |        |          |        |   |        |        |        |        |        |        |   |
|----|----------|--------|----------|--------|----------|--------|---|--------|--------|--------|--------|--------|--------|---|
| 7  | 951.49   | 476.25 | 934.46   | 467.74 | 933.48   | 467.24 | T | 560.29 | 280.65 | 543.27 | 272.14 | 542.28 | 271.65 | 4 |
| 8  | 1,088.55 | 544.78 | 1,071.52 | 536.27 | 1,070.54 | 535.77 | H | 459.25 | 230.13 | 442.22 | 221.61 |        |        | 3 |
| 9  | 1,235.62 | 618.31 | 1,218.59 | 609.80 | 1,217.61 | 609.31 | F | 322.19 | 161.60 | 305.16 | 153.08 |        |        | 2 |
| 10 |          |        |          |        |          |        | R | 175.12 | 88.06  | 158.09 | 79.55  |        |        | 1 |

Query 37436 Hit 1

MS/MS Fragmentation of **NLLHQDAVDLFR**

Found in **sp|P57105|SYJ2B\_HUMAN**, Synaptojanin-2-binding protein OS=Homo sapiens GN=SYNJ2BP PE=1 SV=2

Match to Query 37436: 1583.848from(528.9565,3+)

Title: 623: Scan 1407 (rt=41.1296, f=3, i=213) [D:\lab212\membrane\Grace\Joyce\iTRAQ\_37\_1.raw]

Data File: Submitted from 20120508-1(merge) by Mascot Daemon on JOYCE-VAIO

Monoisotopic mass of neutral peptide Mr(calc): 1583.848

Variable modifications:

Ions Score: 61.37 Expect: 0.001

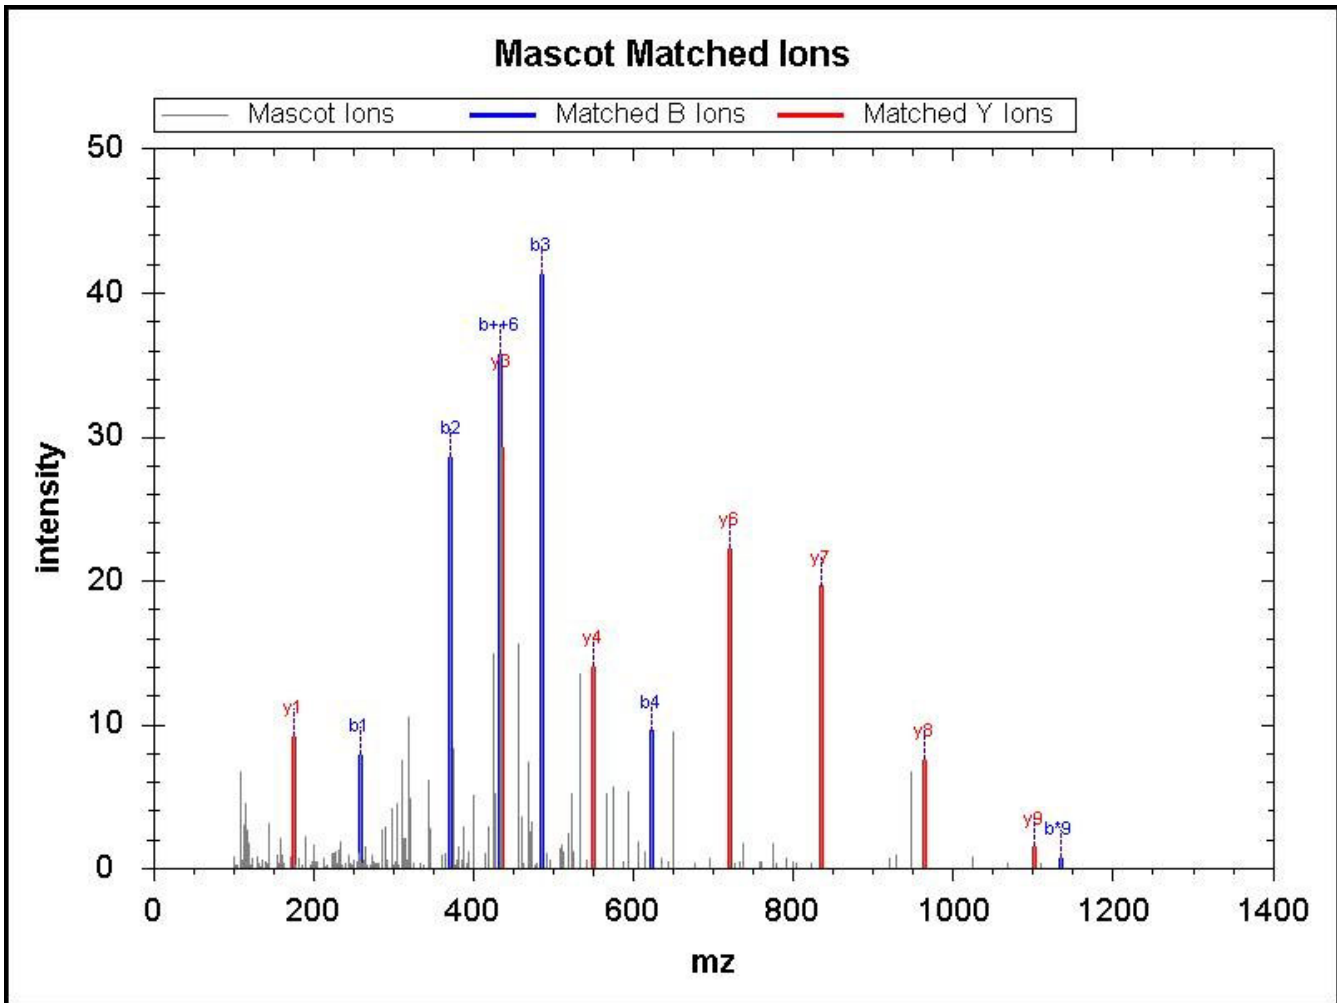

| No | b        | b++    | b*       | b*++   | b0       | b0++   | Seq | y        | y++    | y*       | y*++   | y0       | y0++   | RevNo |
|----|----------|--------|----------|--------|----------|--------|-----|----------|--------|----------|--------|----------|--------|-------|
| 1  | 259.15   | 130.08 | 242.13   | 121.57 |          |        | N   |          |        |          |        |          |        | 12    |
| 2  | 372.24   | 186.62 | 355.21   | 178.11 |          |        | L   | 1,326.72 | 663.86 | 1,309.69 | 655.35 | 1,308.71 | 654.86 | 11    |
| 3  | 485.32   | 243.16 | 468.29   | 234.65 |          |        | L   | 1,213.63 | 607.32 | 1,196.61 | 598.81 | 1,195.62 | 598.31 | 10    |
| 4  | 622.38   | 311.69 | 605.35   | 303.18 |          |        | H   | 1,100.55 | 550.78 | 1,083.52 | 542.26 | 1,082.54 | 541.77 | 9     |
| 5  | 750.44   | 375.72 | 733.41   | 367.21 |          |        | Q   | 963.49   | 482.25 | 946.46   | 473.74 | 945.48   | 473.24 | 8     |
| 6  | 865.46   | 433.24 | 848.44   | 424.72 | 847.45   | 424.23 | D   | 835.43   | 418.22 | 818.40   | 409.71 | 817.42   | 409.21 | 7     |
| 7  | 936.50   | 468.75 | 919.48   | 460.24 | 918.49   | 459.75 | A   | 720.40   | 360.71 | 703.38   | 352.19 | 702.39   | 351.70 | 6     |
| 8  | 1,035.57 | 518.29 | 1,018.54 | 509.78 | 1,017.56 | 509.28 | V   | 649.37   | 325.19 | 632.34   | 316.67 | 631.36   | 316.18 | 5     |
| 9  | 1,150.60 | 575.80 | 1,133.57 | 567.29 | 1,132.59 | 566.80 | D   | 550.30   | 275.65 | 533.27   | 267.14 | 532.29   | 266.65 | 4     |
| 10 | 1,263.68 | 632.34 | 1,246.65 | 623.83 | 1,245.67 | 623.34 | L   | 435.27   | 218.14 | 418.24   | 209.63 |          |        | 3     |

|    |          |        |          |        |          |        |   |        |        |        |        |  |  |   |
|----|----------|--------|----------|--------|----------|--------|---|--------|--------|--------|--------|--|--|---|
| 11 | 1,410.75 | 705.88 | 1,393.72 | 697.37 | 1,392.74 | 696.87 | F | 322.19 | 161.60 | 305.16 | 153.08 |  |  | 2 |
| 12 |          |        |          |        |          |        | R | 175.12 | 88.06  | 158.09 | 79.55  |  |  | 1 |

Query 81111 Hit 1

MS/MS Fragmentation of **KGPNVVG**PYGLLQPFADAMK

Found in **sp|P03886|NU1M\_HUMAN**, NADH-ubiquinone oxidoreductase chain 1 OS=Homo sapiens GN=MT-ND1 PE=1 SV=1  
Match to Query 81111: 2533.41 from (634.3597,4+)

Title: 997: Scan 2163 (rt=58.4665, f=2, i=351) [D:\lab212\membrane\Grace\Joyce\iTRAQ\_43\_1.raw]

Data File: Submitted from 20120508-1(merge) by Mascot Daemon on JOYCE-VAIO

Monoisotopic mass of neutral peptide Mr(calc): 2533.41

Variable modifications:

K1 :iTRAQ4plex (K)

K20 :iTRAQ4plex (K)

Ions Score: 61.22 Expect: 0.000

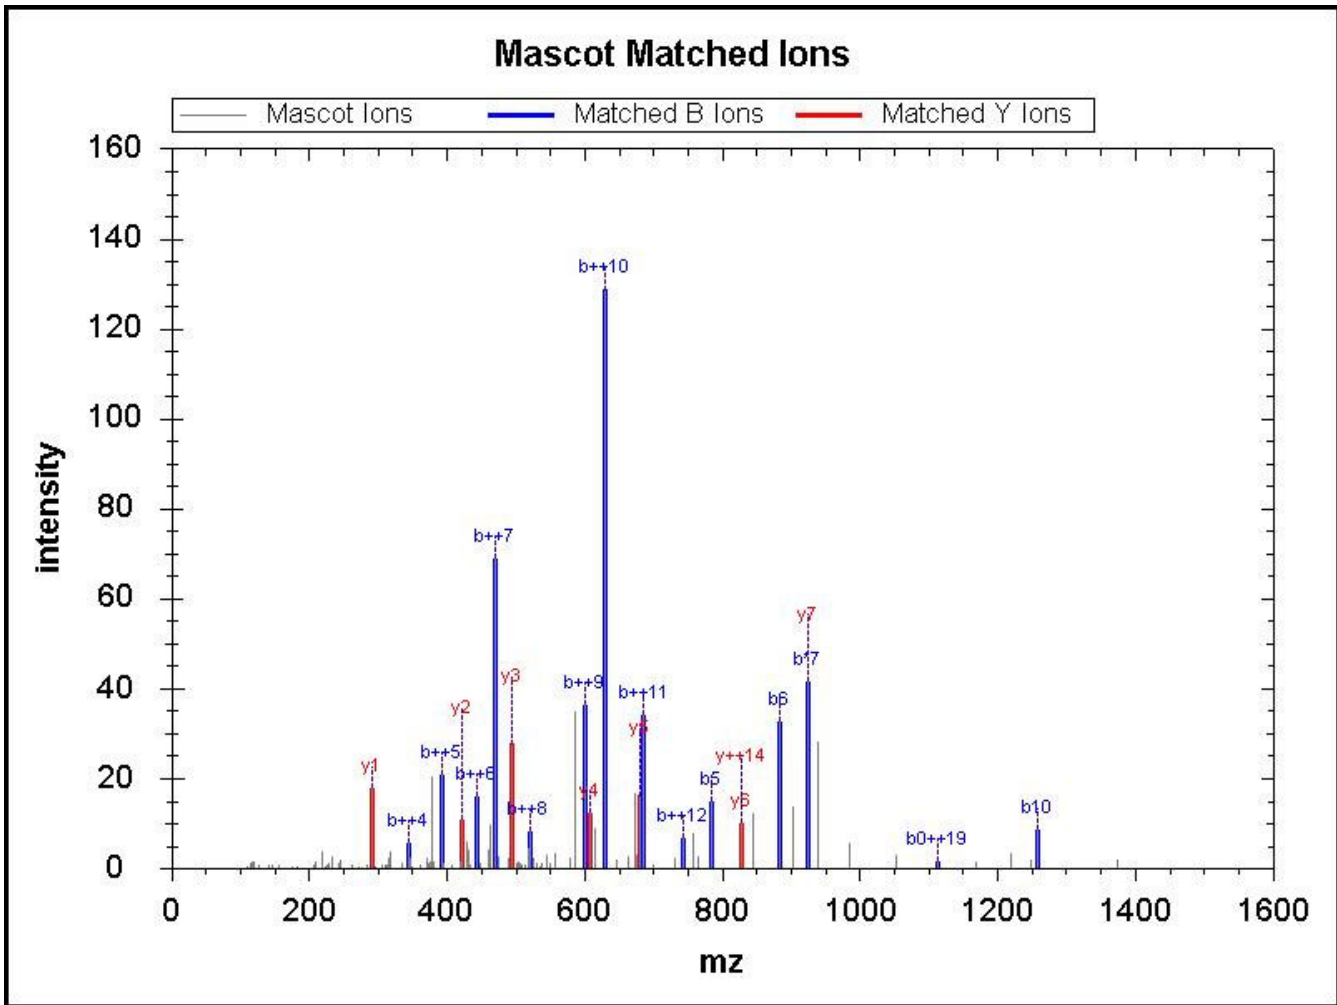

| No | b        | b++    | b*       | b*++   | b0 | b0++ | Seq | y        | y++      | y*       | y*++     | y0       | y0++     | RevNo |
|----|----------|--------|----------|--------|----|------|-----|----------|----------|----------|----------|----------|----------|-------|
| 1  | 417.31   | 209.16 | 400.28   | 200.64 |    |      | K   |          |          |          |          |          |          | 20    |
| 2  | 474.33   | 237.67 | 457.30   | 229.15 |    |      | G   | 2,118.12 | 1,059.56 | 2,101.09 | 1,051.05 | 2,100.11 | 1,050.56 | 19    |
| 3  | 571.38   | 286.19 | 554.35   | 277.68 |    |      | P   | 2,061.10 | 1,031.05 | 2,044.07 | 1,022.54 | 2,043.09 | 1,022.05 | 18    |
| 4  | 685.42   | 343.22 | 668.40   | 334.70 |    |      | N   | 1,964.04 | 982.53   | 1,947.02 | 974.01   | 1,946.03 | 973.52   | 17    |
| 5  | 784.49   | 392.75 | 767.47   | 384.24 |    |      | V   | 1,850.00 | 925.50   | 1,832.97 | 916.99   | 1,831.99 | 916.50   | 16    |
| 6  | 883.56   | 442.28 | 866.53   | 433.77 |    |      | V   | 1,750.93 | 875.97   | 1,733.91 | 867.46   | 1,732.92 | 866.96   | 15    |
| 7  | 940.58   | 470.79 | 923.56   | 462.28 |    |      | G   | 1,651.86 | 826.44   | 1,634.84 | 817.92   | 1,633.85 | 817.43   | 14    |
| 8  | 1,037.63 | 519.32 | 1,020.61 | 510.81 |    |      | P   | 1,594.84 | 797.92   | 1,577.82 | 789.41   | 1,576.83 | 788.92   | 13    |
| 9  | 1,200.70 | 600.85 | 1,183.67 | 592.34 |    |      | Y   | 1,497.79 | 749.40   | 1,480.76 | 740.89   | 1,479.78 | 740.39   | 12    |
| 10 | 1,257.72 | 629.36 | 1,240.69 | 620.85 |    |      | G   | 1,334.73 | 667.87   | 1,317.70 | 659.35   | 1,316.72 | 658.86   | 11    |
| 11 | 1,370.80 | 685.91 | 1,353.78 | 677.39 |    |      | L   | 1,277.70 | 639.36   | 1,260.68 | 630.84   | 1,259.69 | 630.35   | 10    |

|    |          |          |          |          |          |          |   |          |        |          |        |          |        |   |
|----|----------|----------|----------|----------|----------|----------|---|----------|--------|----------|--------|----------|--------|---|
| 12 | 1,483.89 | 742.45   | 1,466.86 | 733.93   |          |          | L | 1,164.62 | 582.81 | 1,147.59 | 574.30 | 1,146.61 | 573.81 | 9 |
| 13 | 1,611.95 | 806.48   | 1,594.92 | 797.96   |          |          | Q | 1,051.54 | 526.27 | 1,034.51 | 517.76 | 1,033.53 | 517.27 | 8 |
| 14 | 1,709.00 | 855.00   | 1,691.97 | 846.49   |          |          | P | 923.48   | 462.24 | 906.45   | 453.73 | 905.47   | 453.24 | 7 |
| 15 | 1,856.07 | 928.54   | 1,839.04 | 920.02   |          |          | F | 826.42   | 413.72 | 809.40   | 405.20 | 808.41   | 404.71 | 6 |
| 16 | 1,927.10 | 964.06   | 1,910.08 | 955.54   |          |          | A | 679.36   | 340.18 | 662.33   | 331.67 | 661.35   | 331.18 | 5 |
| 17 | 2,042.13 | 1,021.57 | 2,025.10 | 1,013.06 | 2,024.12 | 1,012.56 | D | 608.32   | 304.66 | 591.29   | 296.15 | 590.31   | 295.66 | 4 |
| 18 | 2,113.17 | 1,057.09 | 2,096.14 | 1,048.57 | 2,095.16 | 1,048.08 | A | 493.29   | 247.15 | 476.27   | 238.64 |          |        | 3 |
| 19 | 2,244.21 | 1,122.61 | 2,227.18 | 1,114.09 | 2,226.20 | 1,113.60 | M | 422.26   | 211.63 | 405.23   | 203.12 |          |        | 2 |
| 20 |          |          |          |          |          |          | K | 291.21   | 146.11 | 274.19   | 137.60 |          |        | 1 |

Query 76676 Hit 1

MS/MS Fragmentation of **ELHVGENQIEMLEAEHLK**

Found in **sp|Q9H9A6|LRC40\_HUMAN**, Leucine-rich repeat-containing protein 40 OS=Homo sapiens GN=LRC40 PE=1 SV=1

Match to Query 76676: 2406.256from(602.5714,4+)

Title: 467: Scan 1413 (rt=40.1009, f=3, i=158) [D:\lab212\membrane\Grace\Joyce\iTRAQ\_48\_1.raw]

Data File: Submitted from 20120508-1(merge) by Mascot Daemon on JOYCE-VAIO

Monoisotopic mass of neutral peptide Mr(calc): 2406.256

Variable modifications:

K18 iTRAQ4plex (K)

Ions Score: 61.04 Expect: 0.001

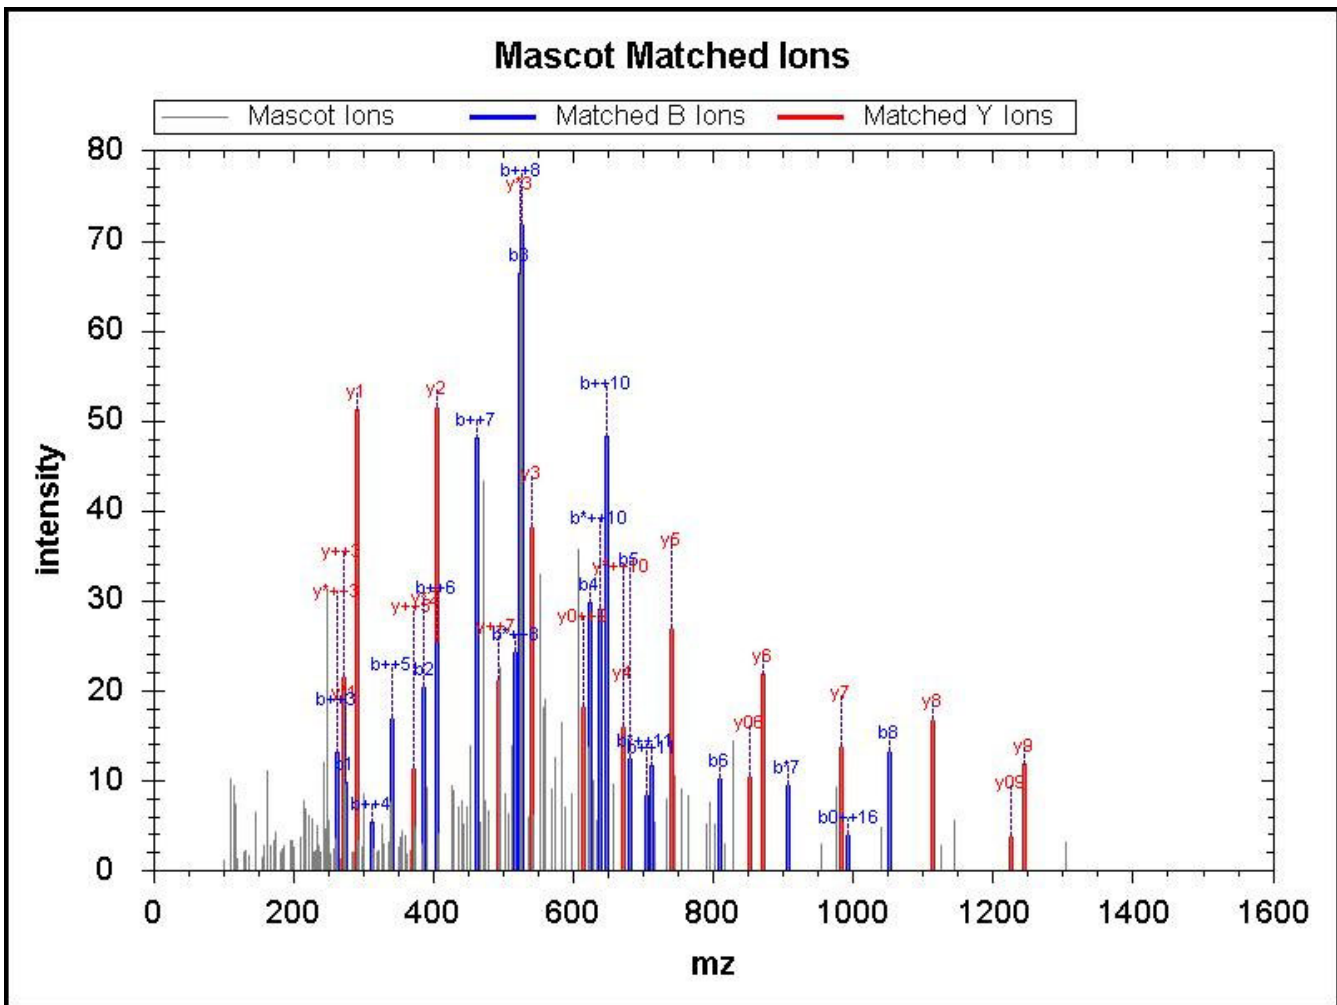

| No | b      | b++    | b* | b*++ | b0     | b0++   | Seq | y        | y++      | y*       | y*++     | y0       | y0++     | RevNo |
|----|--------|--------|----|------|--------|--------|-----|----------|----------|----------|----------|----------|----------|-------|
| 1  | 274.15 | 137.58 |    |      | 256.14 | 128.57 | E   |          |          |          |          |          |          | 18    |
| 2  | 387.24 | 194.12 |    |      | 369.23 | 185.12 | L   | 2,134.11 | 1,067.56 | 2,117.08 | 1,059.04 | 2,116.10 | 1,058.55 | 17    |
| 3  | 524.29 | 262.65 |    |      | 506.28 | 253.65 | H   | 2,021.02 | 1,011.02 | 2,004.00 | 1,002.50 | 2,003.01 | 1,002.01 | 16    |
| 4  | 623.36 | 312.19 |    |      | 605.35 | 303.18 | V   | 1,883.97 | 942.49   | 1,866.94 | 933.97   | 1,865.95 | 933.48   | 15    |
| 5  | 680.38 | 340.70 |    |      | 662.37 | 331.69 | G   | 1,784.90 | 892.95   | 1,767.87 | 884.44   | 1,766.89 | 883.95   | 14    |

|    |          |          |          |          |          |          |   |          |        |          |        |          |        |    |
|----|----------|----------|----------|----------|----------|----------|---|----------|--------|----------|--------|----------|--------|----|
| 6  | 809.43   | 405.22   |          |          | 791.42   | 396.21   | E | 1,727.88 | 864.44 | 1,710.85 | 855.93 | 1,709.86 | 855.44 | 13 |
| 7  | 923.47   | 462.24   | 906.44   | 453.73   | 905.46   | 453.23   | N | 1,598.83 | 799.92 | 1,581.81 | 791.41 | 1,580.82 | 790.91 | 12 |
| 8  | 1,051.53 | 526.27   | 1,034.50 | 517.75   | 1,033.52 | 517.26   | Q | 1,484.79 | 742.90 | 1,467.76 | 734.39 | 1,466.78 | 733.89 | 11 |
| 9  | 1,164.61 | 582.81   | 1,147.59 | 574.30   | 1,146.60 | 573.80   | I | 1,356.73 | 678.87 | 1,339.70 | 670.36 | 1,338.72 | 669.86 | 10 |
| 10 | 1,293.66 | 647.33   | 1,276.63 | 638.82   | 1,275.65 | 638.33   | E | 1,243.65 | 622.33 | 1,226.62 | 613.81 | 1,225.64 | 613.32 | 9  |
| 11 | 1,424.70 | 712.85   | 1,407.67 | 704.34   | 1,406.69 | 703.85   | M | 1,114.60 | 557.81 | 1,097.58 | 549.29 | 1,096.59 | 548.80 | 8  |
| 12 | 1,537.78 | 769.39   | 1,520.75 | 760.88   | 1,519.77 | 760.39   | L | 983.56   | 492.29 | 966.54   | 483.77 | 965.55   | 483.28 | 7  |
| 13 | 1,666.82 | 833.92   | 1,649.80 | 825.40   | 1,648.81 | 824.91   | E | 870.48   | 435.74 | 853.45   | 427.23 | 852.47   | 426.74 | 6  |
| 14 | 1,737.86 | 869.43   | 1,720.83 | 860.92   | 1,719.85 | 860.43   | A | 741.44   | 371.22 | 724.41   | 362.71 | 723.43   | 362.22 | 5  |
| 15 | 1,866.90 | 933.95   | 1,849.88 | 925.44   | 1,848.89 | 924.95   | E | 670.40   | 335.70 | 653.37   | 327.19 | 652.39   | 326.70 | 4  |
| 16 | 2,003.96 | 1,002.48 | 1,986.94 | 993.97   | 1,985.95 | 993.48   | H | 541.36   | 271.18 | 524.33   | 262.67 |          |        | 3  |
| 17 | 2,117.05 | 1,059.03 | 2,100.02 | 1,050.51 | 2,099.04 | 1,050.02 | L | 404.30   | 202.65 | 387.27   | 194.14 |          |        | 2  |
| 18 |          |          |          |          |          |          | K | 291.21   | 146.11 | 274.19   | 137.60 |          |        | 1  |

Query 65517 Hit 1

MS/MS Fragmentation of **VTYVDFLVYDVLDQHR**

Found in **sp|P15626|GSTM2\_MOUSE**, Glutathione S-transferase Mu 2 OS=Mus musculus GN=Gstm2 PE=1 SV=2

Match to Query 65517: 2125.097from(709.3729,3+)

Title: 1126: Scan 2479 (rt=65.2564, f=3, i=387) [D:\lab212\membrane\Grace\Joyce\iTRAQ\_32\_1.raw]

Data File: Submitted from 20120508-1(merge) by Mascot Daemon on JOYCE-VAIO

Monoisotopic mass of neutral peptide Mr(calc): 2125.097

Variable modifications:

Ions Score: 60.9 Expect: 0.001

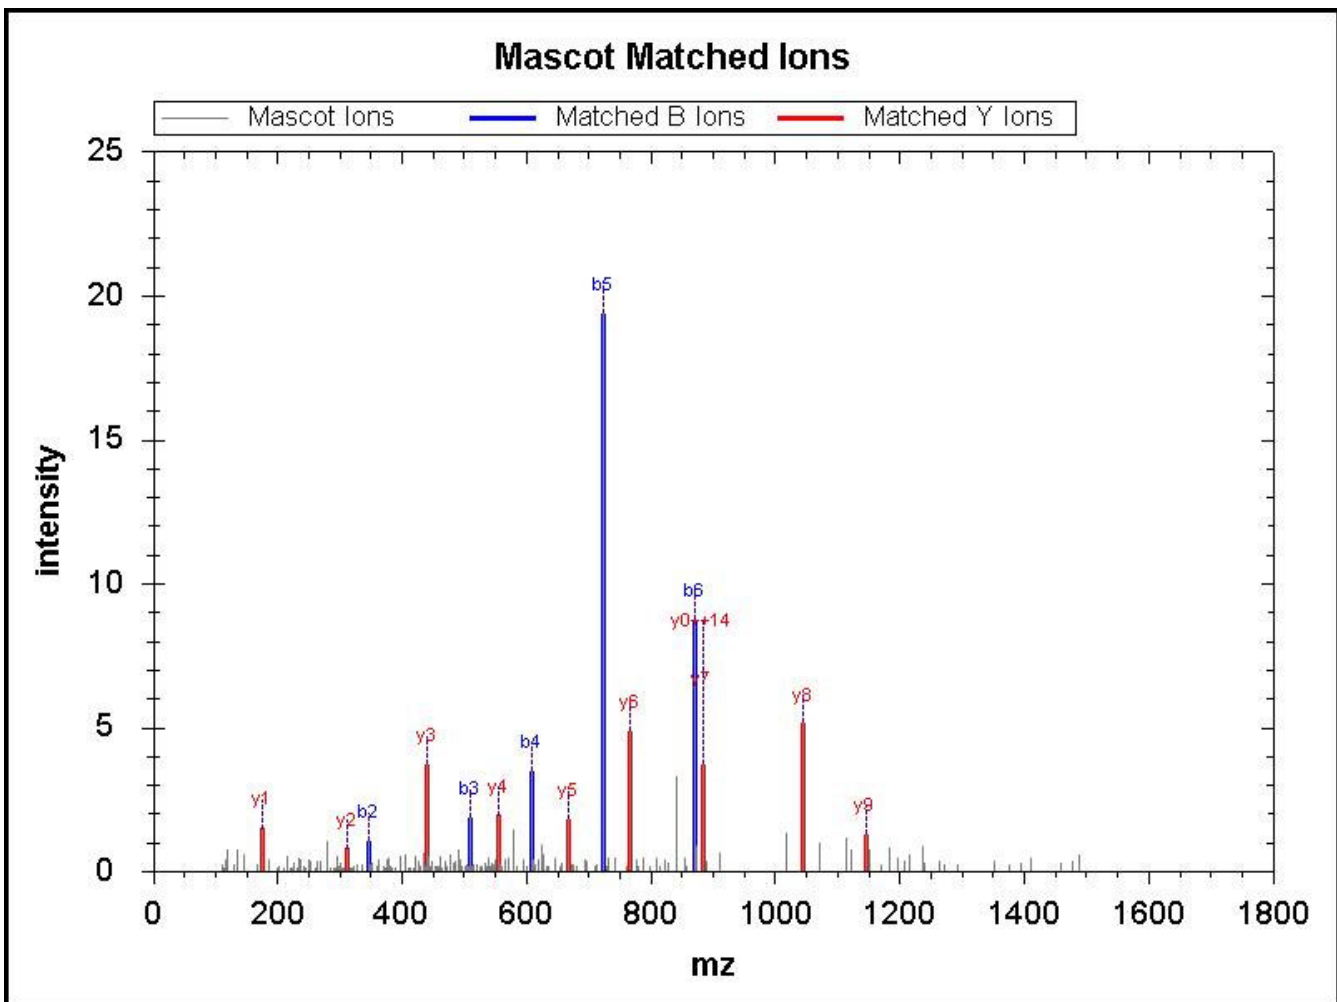

| No | b      | b++    | b* | b*++ | b0     | b0++   | Seq | y        | y++    | y*       | y*++   | y0       | y0++   | RevNo |
|----|--------|--------|----|------|--------|--------|-----|----------|--------|----------|--------|----------|--------|-------|
| 1  | 244.18 | 122.59 |    |      |        |        | V   |          |        |          |        |          |        | 16    |
| 2  | 345.23 | 173.12 |    |      | 327.21 | 164.11 | T   | 1,882.93 | 941.97 | 1,865.91 | 933.46 | 1,864.92 | 932.97 | 15    |

|    |          |        |          |        |          |        |   |          |        |          |        |          |        |    |
|----|----------|--------|----------|--------|----------|--------|---|----------|--------|----------|--------|----------|--------|----|
| 3  | 508.29   | 254.65 |          |        | 490.28   | 245.64 | Y | 1,781.89 | 891.45 | 1,764.86 | 882.93 | 1,763.88 | 882.44 | 14 |
| 4  | 607.36   | 304.18 |          |        | 589.35   | 295.18 | V | 1,618.82 | 809.91 | 1,601.80 | 801.40 | 1,600.81 | 800.91 | 13 |
| 5  | 722.38   | 361.70 |          |        | 704.37   | 352.69 | D | 1,519.75 | 760.38 | 1,502.73 | 751.87 | 1,501.74 | 751.38 | 12 |
| 6  | 869.45   | 435.23 |          |        | 851.44   | 426.22 | F | 1,404.73 | 702.87 | 1,387.70 | 694.35 | 1,386.72 | 693.86 | 11 |
| 7  | 982.54   | 491.77 |          |        | 964.53   | 482.77 | L | 1,257.66 | 629.33 | 1,240.63 | 620.82 | 1,239.65 | 620.33 | 10 |
| 8  | 1,081.60 | 541.31 |          |        | 1,063.59 | 532.30 | V | 1,144.57 | 572.79 | 1,127.55 | 564.28 | 1,126.56 | 563.79 | 9  |
| 9  | 1,244.67 | 622.84 |          |        | 1,226.66 | 613.83 | Y | 1,045.51 | 523.26 | 1,028.48 | 514.74 | 1,027.50 | 514.25 | 8  |
| 10 | 1,359.70 | 680.35 |          |        | 1,341.68 | 671.35 | D | 882.44   | 441.73 | 865.42   | 433.21 | 864.43   | 432.72 | 7  |
| 11 | 1,458.76 | 729.89 |          |        | 1,440.75 | 720.88 | V | 767.42   | 384.21 | 750.39   | 375.70 | 749.41   | 375.21 | 6  |
| 12 | 1,571.85 | 786.43 |          |        | 1,553.84 | 777.42 | L | 668.35   | 334.68 | 651.32   | 326.16 | 650.34   | 325.67 | 5  |
| 13 | 1,686.87 | 843.94 |          |        | 1,668.86 | 834.94 | D | 555.26   | 278.14 | 538.24   | 269.62 | 537.25   | 269.13 | 4  |
| 14 | 1,814.93 | 907.97 | 1,797.91 | 899.46 | 1,796.92 | 898.97 | Q | 440.24   | 220.62 | 423.21   | 212.11 |          |        | 3  |
| 15 | 1,951.99 | 976.50 | 1,934.97 | 967.99 | 1,933.98 | 967.49 | H | 312.18   | 156.59 | 295.15   | 148.08 |          |        | 2  |
| 16 |          |        |          |        |          |        | R | 175.12   | 88.06  | 158.09   | 79.55  |          |        | 1  |

Query 89789 Hit 1

MS/MS Fragmentation of **HLMELNALDKQEELPLGVHLAR**

Found in **sp|Q9H2U1|DHX36\_HUMAN**, Probable ATP-dependent RNA helicase DHX36 OS=Homo sapiens GN=DHX36 PE=1 SV=2

Match to Query 89789: 2914.592 from (729.6553, 4+)

Title: 657: Scan 1661 (rt=46.0892, f=2, i=254) [D:\lab212\membrane\Grace\Joyce\iTRAQ\_51\_2.raw]

Data File: Submitted from 20120508-1(merge) by Mascot Daemon on JOYCE-VAIO

Monoisotopic mass of neutral peptide Mr(calc): 2914.592

Variable modifications:

K10 iTRAQ4plex (K)

Ions Score: 60.88 Expect: 0.000

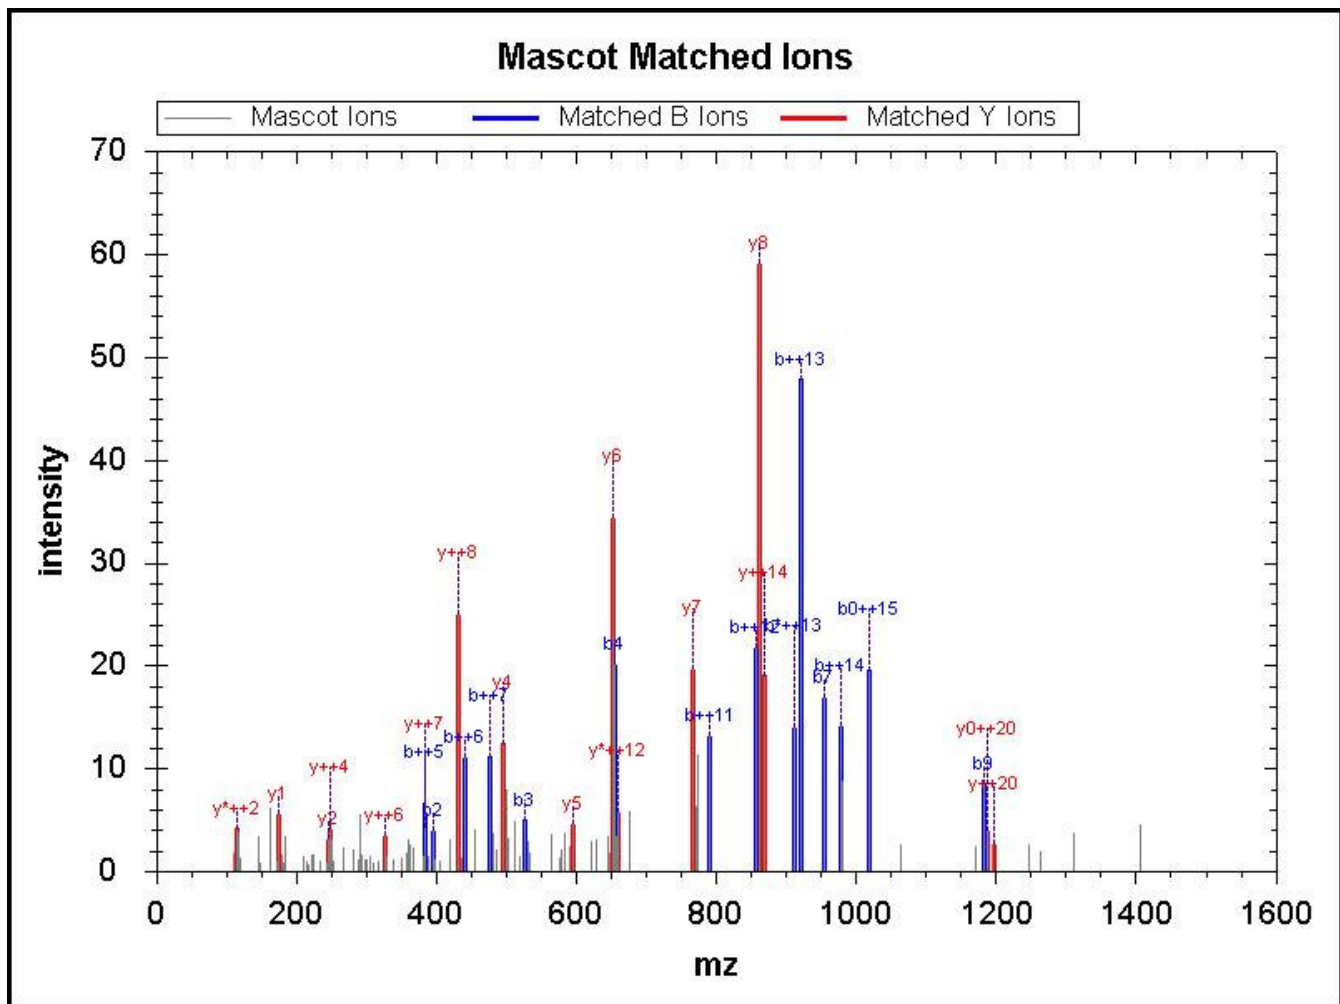

| No | b | b++ | b* | b*++ | b0 | b0++ | Seq | y | y++ | y* | y*++ | y0 | y0++ | RevNo |
|----|---|-----|----|------|----|------|-----|---|-----|----|------|----|------|-------|
|----|---|-----|----|------|----|------|-----|---|-----|----|------|----|------|-------|

|    |          |          |          |          |          |          |   |          |          |          |          |          |          |    |
|----|----------|----------|----------|----------|----------|----------|---|----------|----------|----------|----------|----------|----------|----|
| 1  | 282.17   | 141.59   |          |          |          |          | H |          |          |          |          |          |          | 23 |
| 2  | 395.25   | 198.13   |          |          |          |          | L | 2,634.44 | 1,317.72 | 2,617.41 | 1,309.21 | 2,616.43 | 1,308.72 | 22 |
| 3  | 526.29   | 263.65   |          |          |          |          | M | 2,521.36 | 1,261.18 | 2,504.33 | 1,252.67 | 2,503.35 | 1,252.18 | 21 |
| 4  | 655.34   | 328.17   |          |          | 637.32   | 319.17   | E | 2,390.32 | 1,195.66 | 2,373.29 | 1,187.15 | 2,372.31 | 1,186.66 | 20 |
| 5  | 768.42   | 384.71   |          |          | 750.41   | 375.71   | L | 2,261.27 | 1,131.14 | 2,244.25 | 1,122.63 | 2,243.26 | 1,122.14 | 19 |
| 6  | 882.46   | 441.73   | 865.44   | 433.22   | 864.45   | 432.73   | N | 2,148.19 | 1,074.60 | 2,131.16 | 1,066.09 | 2,130.18 | 1,065.59 | 18 |
| 7  | 953.50   | 477.25   | 936.47   | 468.74   | 935.49   | 468.25   | A | 2,034.15 | 1,017.58 | 2,017.12 | 1,009.06 | 2,016.14 | 1,008.57 | 17 |
| 8  | 1,066.58 | 533.80   | 1,049.56 | 525.28   | 1,048.57 | 524.79   | L | 1,963.11 | 982.06   | 1,946.08 | 973.55   | 1,945.10 | 973.05   | 16 |
| 9  | 1,181.61 | 591.31   | 1,164.58 | 582.80   | 1,163.60 | 582.30   | D | 1,850.03 | 925.52   | 1,833.00 | 917.00   | 1,832.01 | 916.51   | 15 |
| 10 | 1,453.81 | 727.41   | 1,436.78 | 718.89   | 1,435.80 | 718.40   | K | 1,735.00 | 868.00   | 1,717.97 | 859.49   | 1,716.99 | 859.00   | 14 |
| 11 | 1,581.87 | 791.44   | 1,564.84 | 782.92   | 1,563.86 | 782.43   | Q | 1,462.80 | 731.90   | 1,445.77 | 723.39   | 1,444.79 | 722.90   | 13 |
| 12 | 1,710.91 | 855.96   | 1,693.88 | 847.44   | 1,692.90 | 846.95   | E | 1,334.74 | 667.88   | 1,317.72 | 659.36   | 1,316.73 | 658.87   | 12 |
| 13 | 1,839.95 | 920.48   | 1,822.92 | 911.97   | 1,821.94 | 911.47   | E | 1,205.70 | 603.35   | 1,188.67 | 594.84   | 1,187.69 | 594.35   | 11 |
| 14 | 1,953.04 | 977.02   | 1,936.01 | 968.51   | 1,935.02 | 968.02   | L | 1,076.66 | 538.83   | 1,059.63 | 530.32   | 1,058.65 | 529.83   | 10 |
| 15 | 2,054.08 | 1,027.55 | 2,037.06 | 1,019.03 | 2,036.07 | 1,018.54 | T | 963.57   | 482.29   | 946.55   | 473.78   | 945.56   | 473.29   | 9  |
| 16 | 2,151.14 | 1,076.07 | 2,134.11 | 1,067.56 | 2,133.13 | 1,067.07 | P | 862.53   | 431.77   | 845.50   | 423.25   |          |          | 8  |
| 17 | 2,264.22 | 1,132.61 | 2,247.19 | 1,124.10 | 2,246.21 | 1,123.61 | L | 765.47   | 383.24   | 748.45   | 374.73   |          |          | 7  |
| 18 | 2,321.24 | 1,161.12 | 2,304.21 | 1,152.61 | 2,303.23 | 1,152.12 | G | 652.39   | 326.70   | 635.36   | 318.18   |          |          | 6  |
| 19 | 2,420.31 | 1,210.66 | 2,403.28 | 1,202.15 | 2,402.30 | 1,201.65 | V | 595.37   | 298.19   | 578.34   | 289.67   |          |          | 5  |
| 20 | 2,557.37 | 1,279.19 | 2,540.34 | 1,270.67 | 2,539.36 | 1,270.18 | H | 496.30   | 248.65   | 479.27   | 240.14   |          |          | 4  |
| 21 | 2,670.45 | 1,335.73 | 2,653.43 | 1,327.22 | 2,652.44 | 1,326.72 | L | 359.24   | 180.12   | 342.21   | 171.61   |          |          | 3  |
| 22 | 2,741.49 | 1,371.25 | 2,724.46 | 1,362.74 | 2,723.48 | 1,362.24 | A | 246.16   | 123.58   | 229.13   | 115.07   |          |          | 2  |
| 23 |          |          |          |          |          |          | R | 175.12   | 88.06    | 158.09   | 79.55    |          |          | 1  |

Query 100052 Hit 1

MS/MS Fragmentation of **LNLLQSHPQEVMYFQPGPEFGSVEDDHIPFLR**

Found in **sp|Q9NXS2|QPCTL\_HUMAN**, Glutaminyl-peptide cyclotransferase-like protein OS=Homo sapiens GN=QPCTL PE=1 SV=2

Match to Query 100052: 3882.913from(971.7357,4+)

Title: 1018: Sum of 2 scans in range 2246 (rt=60.0071, f=3, i=346) to 2247 (rt=60.0325, f=3, i=347)

[D:\lab212\membrane\GraceJoyce\iTRAQ\_36\_2.raw]

Data File:Submitted from 20120508-1(merge) by Mascot Daemon on JOYCE-VAIO

Monoisotopic mass of neutral peptide Mr(calc): 3882.913

Variable modifications:

Ions Score: 60.61 Expect: 0.001

### Mascot Matched Ions

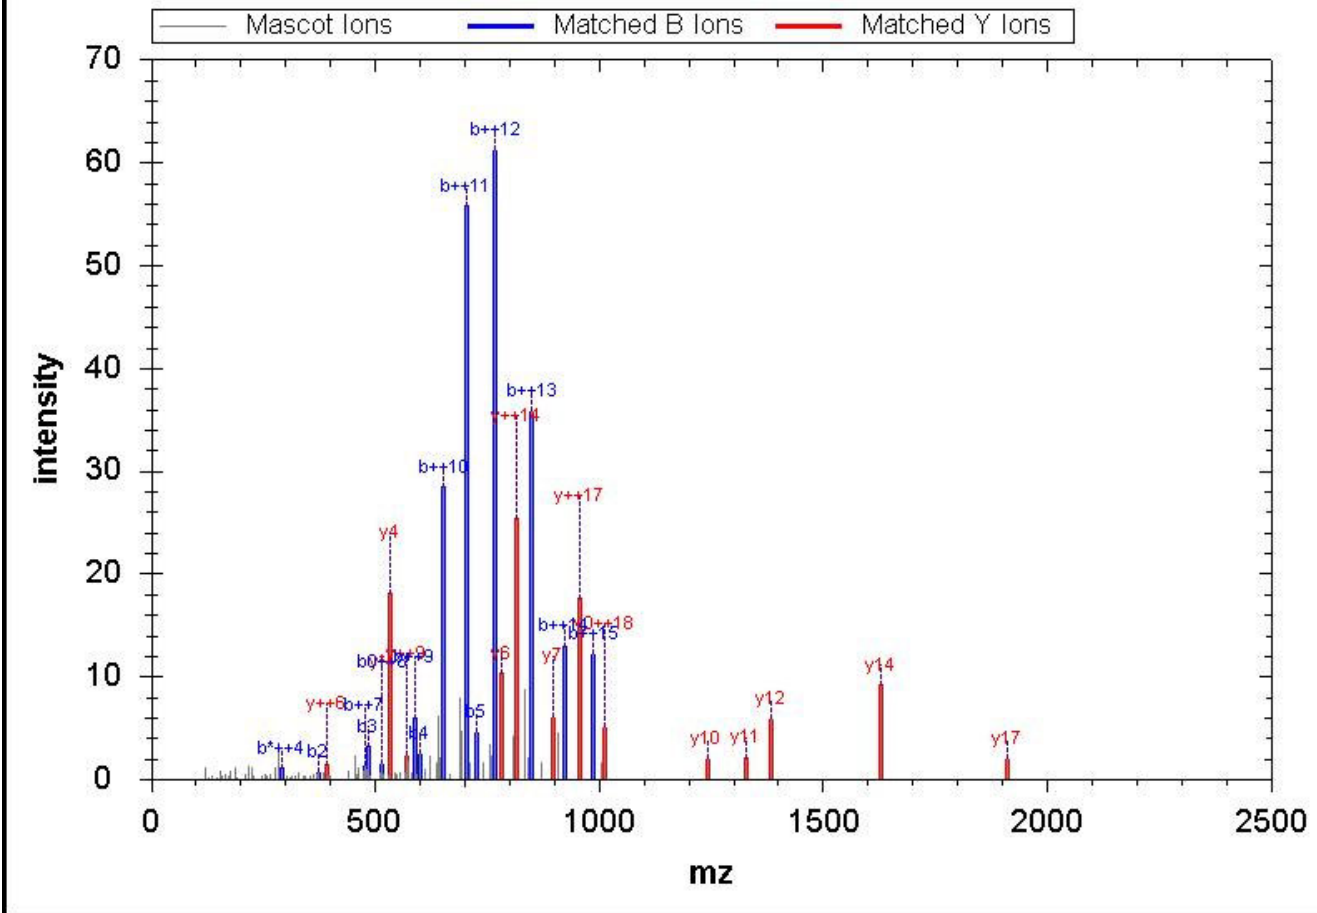

| No | b        | b++      | b*       | b*++     | b0       | b0++     | Seq | y        | y++      | y*       | y*++     | y0       | y0++     | RevNo |
|----|----------|----------|----------|----------|----------|----------|-----|----------|----------|----------|----------|----------|----------|-------|
| 1  | 258.19   | 129.60   |          |          |          |          | L   |          |          |          |          |          |          | 32    |
| 2  | 372.24   | 186.62   | 355.21   | 178.11   |          |          | N   | 3,626.74 | 1,813.87 | 3,609.71 | 1,805.36 | 3,608.73 | 1,804.87 | 31    |
| 3  | 485.32   | 243.16   | 468.29   | 234.65   |          |          | L   | 3,512.69 | 1,756.85 | 3,495.67 | 1,748.34 | 3,494.68 | 1,747.85 | 30    |
| 4  | 598.40   | 299.71   | 581.38   | 291.19   |          |          | L   | 3,399.61 | 1,700.31 | 3,382.58 | 1,691.80 | 3,381.60 | 1,691.30 | 29    |
| 5  | 726.46   | 363.74   | 709.44   | 355.22   |          |          | Q   | 3,286.53 | 1,643.77 | 3,269.50 | 1,635.25 | 3,268.52 | 1,634.76 | 28    |
| 6  | 813.50   | 407.25   | 796.47   | 398.74   | 795.48   | 398.25   | S   | 3,158.47 | 1,579.74 | 3,141.44 | 1,571.22 | 3,140.46 | 1,570.73 | 27    |
| 7  | 950.55   | 475.78   | 933.53   | 467.27   | 932.54   | 466.78   | H   | 3,071.44 | 1,536.22 | 3,054.41 | 1,527.71 | 3,053.42 | 1,527.22 | 26    |
| 8  | 1,047.61 | 524.31   | 1,030.58 | 515.79   | 1,029.60 | 515.30   | P   | 2,934.38 | 1,467.69 | 2,917.35 | 1,459.18 | 2,916.37 | 1,458.69 | 25    |
| 9  | 1,175.67 | 588.34   | 1,158.64 | 579.82   | 1,157.65 | 579.33   | Q   | 2,837.32 | 1,419.17 | 2,820.30 | 1,410.65 | 2,819.31 | 1,410.16 | 24    |
| 10 | 1,304.71 | 652.86   | 1,287.68 | 644.34   | 1,286.70 | 643.85   | E   | 2,709.27 | 1,355.14 | 2,692.24 | 1,346.62 | 2,691.25 | 1,346.13 | 23    |
| 11 | 1,403.78 | 702.39   | 1,386.75 | 693.88   | 1,385.77 | 693.39   | V   | 2,580.22 | 1,290.61 | 2,563.20 | 1,282.10 | 2,562.21 | 1,281.61 | 22    |
| 12 | 1,534.82 | 767.91   | 1,517.79 | 759.40   | 1,516.81 | 758.91   | M   | 2,481.15 | 1,241.08 | 2,464.13 | 1,232.57 | 2,463.14 | 1,232.08 | 21    |
| 13 | 1,697.88 | 849.44   | 1,680.85 | 840.93   | 1,679.87 | 840.44   | Y   | 2,350.11 | 1,175.56 | 2,333.09 | 1,167.05 | 2,332.10 | 1,166.56 | 20    |
| 14 | 1,844.95 | 922.98   | 1,827.92 | 914.46   | 1,826.94 | 913.97   | F   | 2,187.05 | 1,094.03 | 2,170.02 | 1,085.52 | 2,169.04 | 1,085.02 | 19    |
| 15 | 1,973.01 | 987.01   | 1,955.98 | 978.49   | 1,955.00 | 978.00   | Q   | 2,039.98 | 1,020.49 | 2,022.96 | 1,011.98 | 2,021.97 | 1,011.49 | 18    |
| 16 | 2,070.06 | 1,035.53 | 2,053.03 | 1,027.02 | 2,052.05 | 1,026.53 | P   | 1,911.92 | 956.47   | 1,894.90 | 947.95   | 1,893.91 | 947.46   | 17    |
| 17 | 2,127.08 | 1,064.04 | 2,110.05 | 1,055.53 | 2,109.07 | 1,055.04 | G   | 1,814.87 | 907.94   | 1,797.84 | 899.43   | 1,796.86 | 898.93   | 16    |
| 18 | 2,256.12 | 1,128.57 | 2,239.10 | 1,120.05 | 2,238.11 | 1,119.56 | E   | 1,757.85 | 879.43   | 1,740.82 | 870.92   | 1,739.84 | 870.42   | 15    |
| 19 | 2,353.18 | 1,177.09 | 2,336.15 | 1,168.58 | 2,335.17 | 1,168.09 | P   | 1,628.81 | 814.91   | 1,611.78 | 806.39   | 1,610.80 | 805.90   | 14    |
| 20 | 2,500.25 | 1,250.63 | 2,483.22 | 1,242.11 | 2,482.23 | 1,241.62 | F   | 1,531.75 | 766.38   | 1,514.73 | 757.87   | 1,513.74 | 757.38   | 13    |
| 21 | 2,557.27 | 1,279.14 | 2,540.24 | 1,270.62 | 2,539.26 | 1,270.13 | G   | 1,384.69 | 692.85   | 1,367.66 | 684.33   | 1,366.67 | 683.84   | 12    |
| 22 | 2,644.30 | 1,322.65 | 2,627.27 | 1,314.14 | 2,626.29 | 1,313.65 | S   | 1,327.66 | 664.34   | 1,310.64 | 655.82   | 1,309.65 | 655.33   | 11    |
| 23 | 2,743.37 | 1,372.19 | 2,726.34 | 1,363.67 | 2,725.36 | 1,363.18 | V   | 1,240.63 | 620.82   | 1,223.61 | 612.31   | 1,222.62 | 611.81   | 10    |



|    |          |          |          |          |          |          |   |          |        |          |        |          |        |   |
|----|----------|----------|----------|----------|----------|----------|---|----------|--------|----------|--------|----------|--------|---|
| 24 | 2,872.41 | 1,436.71 | 2,855.38 | 1,428.20 | 2,854.40 | 1,427.70 | E | 1,141.56 | 571.29 | 1,124.54 | 562.77 | 1,123.55 | 562.28 | 9 |
| 25 | 2,987.44 | 1,494.22 | 2,970.41 | 1,485.71 | 2,969.43 | 1,485.22 | D | 1,012.52 | 506.76 | 995.49   | 498.25 | 994.51   | 497.76 | 8 |
| 26 | 3,102.46 | 1,551.74 | 3,085.44 | 1,543.22 | 3,084.45 | 1,542.73 | D | 897.49   | 449.25 | 880.47   | 440.74 | 879.48   | 440.25 | 7 |
| 27 | 3,239.52 | 1,620.26 | 3,222.50 | 1,611.75 | 3,221.51 | 1,611.26 | H | 782.47   | 391.74 | 765.44   | 383.22 |          |        | 6 |
| 28 | 3,352.61 | 1,676.81 | 3,335.58 | 1,668.29 | 3,334.60 | 1,667.80 | I | 645.41   | 323.21 | 628.38   | 314.69 |          |        | 5 |
| 29 | 3,449.66 | 1,725.33 | 3,432.63 | 1,716.82 | 3,431.65 | 1,716.33 | P | 532.32   | 266.67 | 515.30   | 258.15 |          |        | 4 |
| 30 | 3,596.73 | 1,798.87 | 3,579.70 | 1,790.35 | 3,578.72 | 1,789.86 | F | 435.27   | 218.14 | 418.24   | 209.63 |          |        | 3 |
| 31 | 3,709.81 | 1,855.41 | 3,692.78 | 1,846.90 | 3,691.80 | 1,846.40 | L | 288.20   | 144.61 | 271.18   | 136.09 |          |        | 2 |
| 32 |          |          |          |          |          |          | R | 175.12   | 88.06  | 158.09   | 79.55  |          |        | 1 |

Query 23131 Hit 1

MS/MS Fragmentation of **EALGDAQQSVR**

Found in **sp|Q99615|DNJC7\_HUMAN**, DnaJ homolog subfamily C member 7 OS=Homo sapiens GN=DNAJC7 PE=1 SV=2

Match to Query 23131: 1316.683from(659.3486,2+)

Title: 135: Scan 522 (rt=20.556, f=3, i=48) [D:\lab212\membrane\GraceJoyce\iTRAQ\_24\_1.raw]

Data File: Submitted from 20120508-1(merge) by Mascot Daemon on JOYCE-VAIO

Monoisotopic mass of neutral peptide Mr(calc): 1316.683

Variable modifications:

Ions Score: 60.43 Expect: 0.001

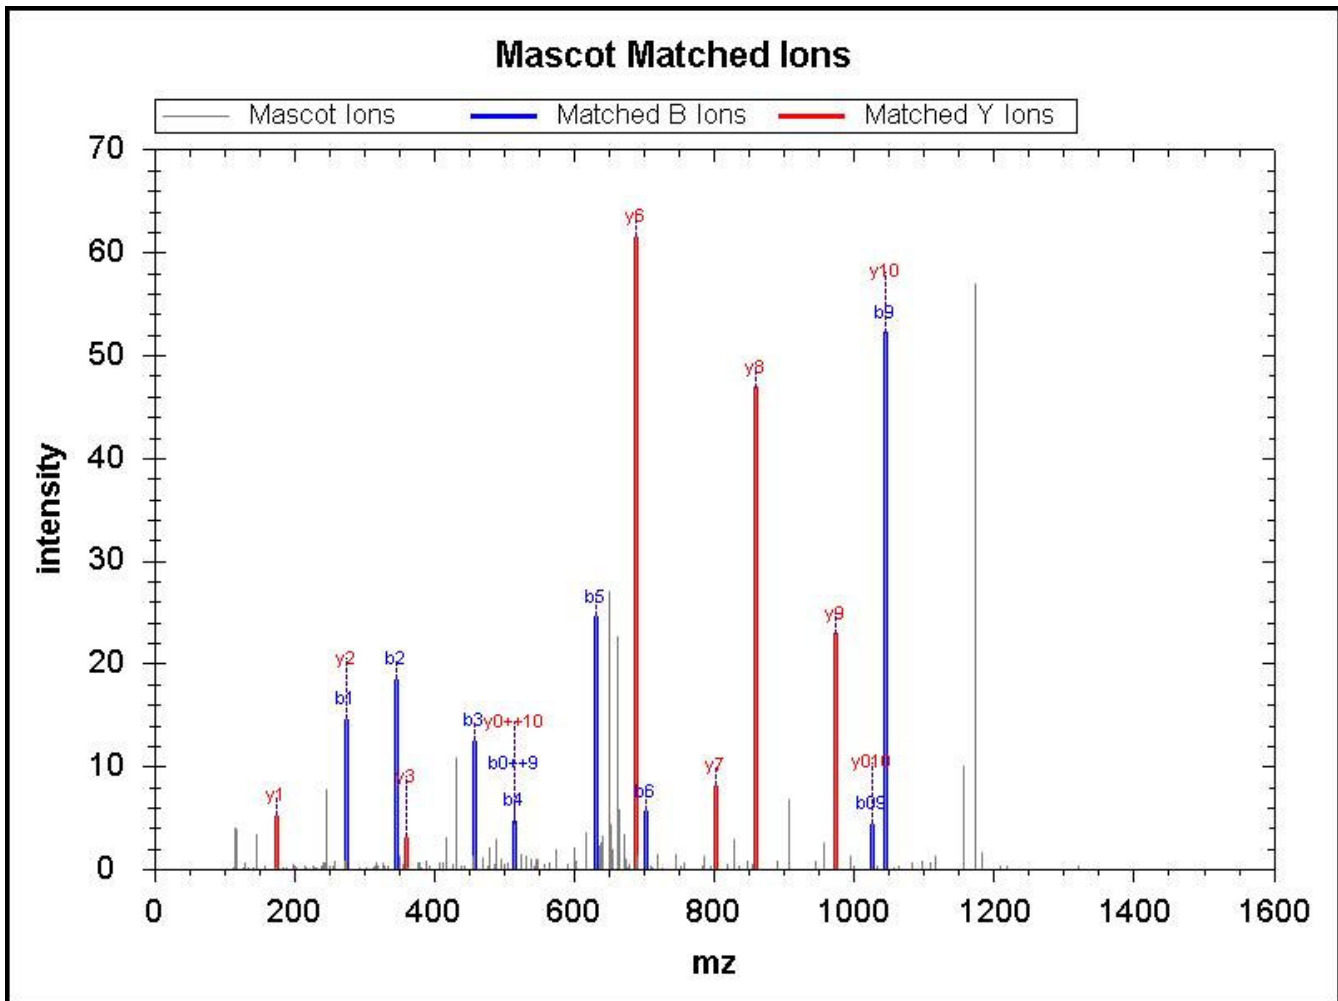

| No | b      | b++    | b* | b*++ | b0     | b0++   | Seq | y        | y++    | y*       | y*++   | y0       | y0++   | RevNo |
|----|--------|--------|----|------|--------|--------|-----|----------|--------|----------|--------|----------|--------|-------|
| 1  | 274.15 | 137.58 |    |      | 256.14 | 128.57 | E   |          |        |          |        |          |        | 11    |
| 2  | 345.19 | 173.10 |    |      | 327.18 | 164.09 | A   | 1,044.54 | 522.78 | 1,027.52 | 514.26 | 1,026.53 | 513.77 | 10    |
| 3  | 458.27 | 229.64 |    |      | 440.26 | 220.63 | L   | 973.51   | 487.26 | 956.48   | 478.74 | 955.50   | 478.25 | 9     |
| 4  | 515.29 | 258.15 |    |      | 497.28 | 249.15 | G   | 860.42   | 430.71 | 843.40   | 422.20 | 842.41   | 421.71 | 8     |
| 5  | 630.32 | 315.66 |    |      | 612.31 | 306.66 | D   | 803.40   | 402.20 | 786.37   | 393.69 | 785.39   | 393.20 | 7     |

|    |          |        |          |        |          |        |   |        |        |        |        |        |        |   |
|----|----------|--------|----------|--------|----------|--------|---|--------|--------|--------|--------|--------|--------|---|
| 6  | 701.36   | 351.18 |          |        | 683.35   | 342.18 | A | 688.37 | 344.69 | 671.35 | 336.18 | 670.36 | 335.69 | 6 |
| 7  | 829.42   | 415.21 | 812.39   | 406.70 | 811.41   | 406.21 | Q | 617.34 | 309.17 | 600.31 | 300.66 | 599.33 | 300.17 | 5 |
| 8  | 957.48   | 479.24 | 940.45   | 470.73 | 939.47   | 470.24 | Q | 489.28 | 245.14 | 472.25 | 236.63 | 471.27 | 236.14 | 4 |
| 9  | 1,044.51 | 522.76 | 1,027.48 | 514.24 | 1,026.50 | 513.75 | S | 361.22 | 181.11 | 344.19 | 172.60 | 343.21 | 172.11 | 3 |
| 10 | 1,143.58 | 572.29 | 1,126.55 | 563.78 | 1,125.57 | 563.29 | V | 274.19 | 137.60 | 257.16 | 129.08 |        |        | 2 |
| 11 |          |        |          |        |          |        | R | 175.12 | 88.06  | 158.09 | 79.55  |        |        | 1 |

Query 85743 Hit 1

MS/MS Fragmentation of **QAFLELESSDLPVALLLAQHK**

Found in [sp|P51948|MAT1\\_HUMAN](#), CDK-activating kinase assembly factor MAT1 OS=Homo sapiens GN=MNAT1 PE=1 SV=1

Match to Query 85743: 2724.495from(909.1722,3+)

Title: 1078: Scan 2570 (rt=66.3008, f=2, i=388) [D:\lab212\membrane\Grace\Joyce\iTRAQ\_34\_1.raw]

Data File: Submitted from 20120508-1(merge) by Mascot Daemon on JOYCE-VAIO

Monoisotopic mass of neutral peptide Mr(calc): 2724.495

Variable modifications:

K22 iTRAQ4plex (K)

Ions Score: 60.1 Expect: 0.000

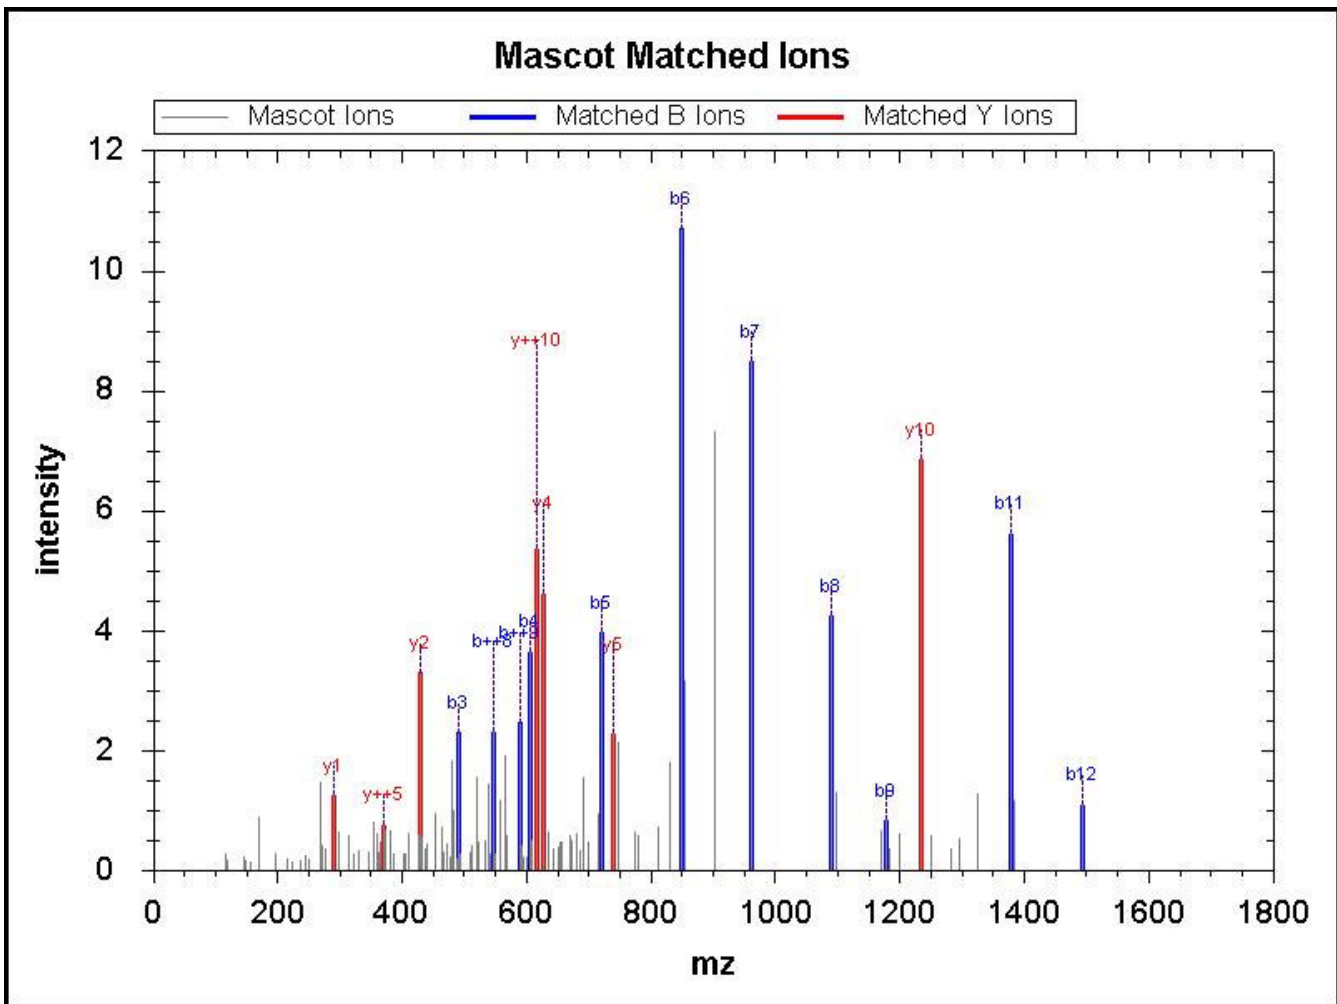

| No | b        | b++    | b*       | b*++   | b0       | b0++   | Seq | y        | y++      | y*       | y*++     | y0       | y0++     | RevNo |
|----|----------|--------|----------|--------|----------|--------|-----|----------|----------|----------|----------|----------|----------|-------|
| 1  | 273.17   | 137.09 | 256.14   | 128.57 |          |        | Q   |          |          |          |          |          |          | 22    |
| 2  | 344.21   | 172.61 | 327.18   | 164.09 |          |        | A   | 2,453.34 | 1,227.17 | 2,436.31 | 1,218.66 | 2,435.33 | 1,218.17 | 21    |
| 3  | 491.27   | 246.14 | 474.25   | 237.63 |          |        | F   | 2,382.30 | 1,191.66 | 2,365.28 | 1,183.14 | 2,364.29 | 1,182.65 | 20    |
| 4  | 604.36   | 302.68 | 587.33   | 294.17 |          |        | L   | 2,235.24 | 1,118.12 | 2,218.21 | 1,109.61 | 2,217.22 | 1,109.12 | 19    |
| 5  | 719.38   | 360.20 | 702.36   | 351.68 | 701.37   | 351.19 | D   | 2,122.15 | 1,061.58 | 2,105.12 | 1,053.07 | 2,104.14 | 1,052.57 | 18    |
| 6  | 848.43   | 424.72 | 831.40   | 416.20 | 830.42   | 415.71 | E   | 2,007.12 | 1,004.07 | 1,990.10 | 995.55   | 1,989.11 | 995.06   | 17    |
| 7  | 961.51   | 481.26 | 944.48   | 472.75 | 943.50   | 472.25 | L   | 1,878.08 | 939.54   | 1,861.06 | 931.03   | 1,860.07 | 930.54   | 16    |
| 8  | 1,090.55 | 545.78 | 1,073.53 | 537.27 | 1,072.54 | 536.78 | E   | 1,765.00 | 883.00   | 1,747.97 | 874.49   | 1,746.99 | 874.00   | 15    |



|    |          |        |          |        |          |        |   |          |        |          |        |          |        |    |
|----|----------|--------|----------|--------|----------|--------|---|----------|--------|----------|--------|----------|--------|----|
| 1  | 202.13   | 101.57 |          |        |          |        | G |          |        |          |        |          |        | 15 |
| 2  | 301.20   | 151.10 |          |        |          |        | V | 1,641.82 | 821.41 | 1,624.79 | 812.90 | 1,623.81 | 812.41 | 14 |
| 3  | 430.24   | 215.62 |          |        | 412.23   | 206.62 | E | 1,542.75 | 771.88 | 1,525.73 | 763.37 | 1,524.74 | 762.87 | 13 |
| 4  | 529.31   | 265.16 |          |        | 511.30   | 256.15 | V | 1,413.71 | 707.36 | 1,396.68 | 698.84 | 1,395.70 | 698.35 | 12 |
| 5  | 630.36   | 315.68 |          |        | 612.35   | 306.68 | T | 1,314.64 | 657.82 | 1,297.61 | 649.31 | 1,296.63 | 648.82 | 11 |
| 6  | 729.43   | 365.22 |          |        | 711.42   | 356.21 | V | 1,213.59 | 607.30 | 1,196.57 | 598.79 | 1,195.58 | 598.29 | 10 |
| 7  | 786.45   | 393.73 |          |        | 768.44   | 384.72 | G | 1,114.52 | 557.77 | 1,097.50 | 549.25 | 1,096.51 | 548.76 | 9  |
| 8  | 923.51   | 462.26 |          |        | 905.50   | 453.25 | H | 1,057.50 | 529.26 | 1,040.48 | 520.74 | 1,039.49 | 520.25 | 8  |
| 9  | 1,052.55 | 526.78 |          |        | 1,034.54 | 517.77 | E | 920.44   | 460.73 | 903.42   | 452.21 | 902.43   | 451.72 | 7  |
| 10 | 1,180.61 | 590.81 | 1,163.58 | 582.29 | 1,162.60 | 581.80 | Q | 791.40   | 396.20 | 774.38   | 387.69 | 773.39   | 387.20 | 6  |
| 11 | 1,309.65 | 655.33 | 1,292.62 | 646.82 | 1,291.64 | 646.32 | E | 663.34   | 332.18 | 646.32   | 323.66 | 645.33   | 323.17 | 5  |
| 12 | 1,438.69 | 719.85 | 1,421.67 | 711.34 | 1,420.68 | 710.84 | E | 534.30   | 267.65 | 517.27   | 259.14 | 516.29   | 258.65 | 4  |
| 13 | 1,495.71 | 748.36 | 1,478.69 | 739.85 | 1,477.70 | 739.36 | G | 405.26   | 203.13 | 388.23   | 194.62 |          |        | 3  |
| 14 | 1,552.74 | 776.87 | 1,535.71 | 768.36 | 1,534.73 | 767.87 | G | 348.24   | 174.62 | 331.21   | 166.11 |          |        | 2  |
| 15 |          |        |          |        |          |        | K | 291.21   | 146.11 | 274.19   | 137.60 |          |        | 1  |

Query 77710 Hit 1

MS/MS Fragmentation of **LSLQDSVATLALSHVTPHDER**

Found in **sp|Q8R2Y2|MUC18\_MOUSE**, Cell surface glycoprotein MUC18 OS=Mus musculus GN=Mcam PE=1 SV=1

Match to Query 77710: 2432.28 from (609.0773, 4+)

Title: 785: Scan 1746 (rt=48.9294, f=2, i=284) [D:\lab212\membrane\Grace\Joyce\iTRAQ\_44\_2.raw]

Data File: Submitted from 20120508-1(merge) by Mascot Daemon on JOYCE-VAIO

Monoisotopic mass of neutral peptide Mr(calc): 2432.28

Variable modifications:

Ions Score: 59.96 Expect: 0.001

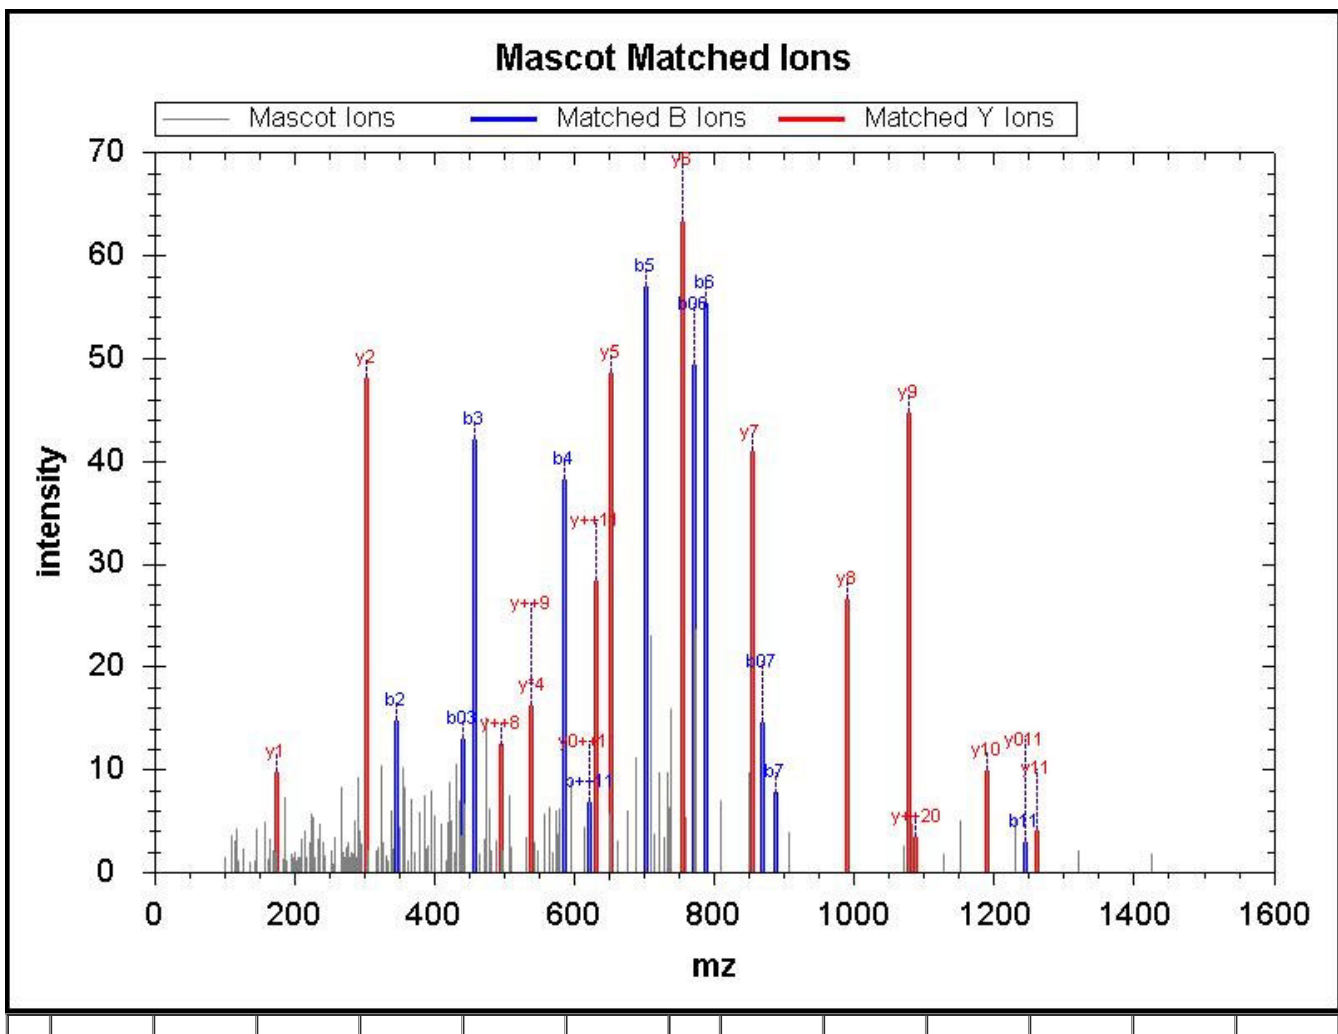

| No | b        | b++      | b*       | b*++     | b0       | b0++     | Seq | y        | y++      | y*       | y*++     | y0       | y0++     | RevNo |
|----|----------|----------|----------|----------|----------|----------|-----|----------|----------|----------|----------|----------|----------|-------|
| 1  | 258.19   | 129.60   |          |          |          |          | L   |          |          |          |          |          |          | 21    |
| 2  | 345.23   | 173.12   |          |          | 327.21   | 164.11   | S   | 2,176.10 | 1,088.55 | 2,159.07 | 1,080.04 | 2,158.09 | 1,079.55 | 20    |
| 3  | 458.31   | 229.66   |          |          | 440.30   | 220.65   | L   | 2,089.07 | 1,045.04 | 2,072.04 | 1,036.52 | 2,071.06 | 1,036.03 | 19    |
| 4  | 586.37   | 293.69   | 569.34   | 285.17   | 568.36   | 284.68   | Q   | 1,975.98 | 988.50   | 1,958.96 | 979.98   | 1,957.97 | 979.49   | 18    |
| 5  | 701.39   | 351.20   | 684.37   | 342.69   | 683.38   | 342.20   | D   | 1,847.92 | 924.47   | 1,830.90 | 915.95   | 1,829.91 | 915.46   | 17    |
| 6  | 788.43   | 394.72   | 771.40   | 386.20   | 770.42   | 385.71   | S   | 1,732.90 | 866.95   | 1,715.87 | 858.44   | 1,714.89 | 857.95   | 16    |
| 7  | 887.50   | 444.25   | 870.47   | 435.74   | 869.48   | 435.25   | V   | 1,645.87 | 823.44   | 1,628.84 | 814.92   | 1,627.86 | 814.43   | 15    |
| 8  | 958.53   | 479.77   | 941.51   | 471.26   | 940.52   | 470.76   | A   | 1,546.80 | 773.90   | 1,529.77 | 765.39   | 1,528.79 | 764.90   | 14    |
| 9  | 1,059.58 | 530.29   | 1,042.55 | 521.78   | 1,041.57 | 521.29   | T   | 1,475.76 | 738.38   | 1,458.73 | 729.87   | 1,457.75 | 729.38   | 13    |
| 10 | 1,172.66 | 586.84   | 1,155.64 | 578.32   | 1,154.65 | 577.83   | L   | 1,374.71 | 687.86   | 1,357.69 | 679.35   | 1,356.70 | 678.85   | 12    |
| 11 | 1,243.70 | 622.35   | 1,226.68 | 613.84   | 1,225.69 | 613.35   | A   | 1,261.63 | 631.32   | 1,244.60 | 622.80   | 1,243.62 | 622.31   | 11    |
| 12 | 1,356.79 | 678.90   | 1,339.76 | 670.38   | 1,338.78 | 669.89   | L   | 1,190.59 | 595.80   | 1,173.56 | 587.29   | 1,172.58 | 586.79   | 10    |
| 13 | 1,443.82 | 722.41   | 1,426.79 | 713.90   | 1,425.81 | 713.41   | S   | 1,077.51 | 539.26   | 1,060.48 | 530.74   | 1,059.50 | 530.25   | 9     |
| 14 | 1,580.88 | 790.94   | 1,563.85 | 782.43   | 1,562.87 | 781.94   | H   | 990.48   | 495.74   | 973.45   | 487.23   | 972.46   | 486.74   | 8     |
| 15 | 1,679.94 | 840.48   | 1,662.92 | 831.96   | 1,661.93 | 831.47   | V   | 853.42   | 427.21   | 836.39   | 418.70   | 835.41   | 418.21   | 7     |
| 16 | 1,780.99 | 891.00   | 1,763.97 | 882.49   | 1,762.98 | 881.99   | T   | 754.35   | 377.68   | 737.32   | 369.16   | 736.34   | 368.67   | 6     |
| 17 | 1,878.05 | 939.53   | 1,861.02 | 931.01   | 1,860.03 | 930.52   | P   | 653.30   | 327.15   | 636.27   | 318.64   | 635.29   | 318.15   | 5     |
| 18 | 2,015.10 | 1,008.06 | 1,998.08 | 999.54   | 1,997.09 | 999.05   | H   | 556.25   | 278.63   | 539.22   | 270.11   | 538.24   | 269.62   | 4     |
| 19 | 2,130.13 | 1,065.57 | 2,113.10 | 1,057.06 | 2,112.12 | 1,056.56 | D   | 419.19   | 210.10   | 402.16   | 201.58   | 401.18   | 201.09   | 3     |
| 20 | 2,259.17 | 1,130.09 | 2,242.15 | 1,121.58 | 2,241.16 | 1,121.09 | E   | 304.16   | 152.58   | 287.13   | 144.07   | 286.15   | 143.58   | 2     |
| 21 |          |          |          |          |          |          | R   | 175.12   | 88.06    | 158.09   | 79.55    |          |          | 1     |

Query 92041 Hit 1

MS/MS Fragmentation of **ESQELAQHAAEIGADGIAVIAPFFFK**

Found in **sp|Q9DCJ9|NPL\_MOUSE**, N-acetylneuraminase OS=Mus musculus GN=Npl PE=2 SV=1

Match to Query 92041: 3046.603 from (762.658, 4+)

Title: 1224: Sum of 2 scans in range 2748 (rt=71.1388, f=3, i=425) to 2749 (rt=71.1642, f=3, i=426)

[D:\lab212\membrane\Grace\Joyce\iTRAQ\_33\_2.raw]

Data File: Submitted from 20120508-1 (merge) by Mascot Daemon on JOYCE-VAIO

Monoisotopic mass of neutral peptide Mr(calc): 3046.603

Variable modifications:

K26 iTRAQ4plex (K)

Ions Score: 59.82 Expect: 0.001



|    |          |          |          |          |          |          |   |        |        |        |        |  |  |   |
|----|----------|----------|----------|----------|----------|----------|---|--------|--------|--------|--------|--|--|---|
| 24 | 2,610.33 | 1,305.67 | 2,593.31 | 1,297.16 | 2,592.32 | 1,296.66 | F | 585.35 | 293.18 | 568.33 | 284.67 |  |  | 3 |
| 25 | 2,757.40 | 1,379.20 | 2,740.37 | 1,370.69 | 2,739.39 | 1,370.20 | F | 438.28 | 219.65 | 421.26 | 211.13 |  |  | 2 |
| 26 |          |          |          |          |          |          | K | 291.21 | 146.11 | 274.19 | 137.60 |  |  | 1 |

Query 26012 Hit 1

MS/MS Fragmentation of **SLDIYFSIK**

Found in **sp|Q9NR50|EI2BG\_HUMAN**, Translation initiation factor eIF-2B subunit gamma OS=Homo sapiens GN=EIF2B3 PE=1 SV=1

Match to Query 26012: 1372.784from(687.3993,2+)

Title: 632: Sum of 2 scans in range 2022 (rt=51.8335, f=4, i=411) to 2023 (rt=51.8589, f=4, i=412)

[D:\lab212\membrane\GraceJoyce\iTRAQ\_29\_2.raw]

Data File:Submitted from 20120508-1(merge) by Mascot Daemon on JOYCE-VAIO

Monoisotopic mass of neutral peptide Mr(calc): 1372.784

Variable modifications:

K9 iTRAQ4plex (K)

Ions Score: 59.75 Expect: 0.001

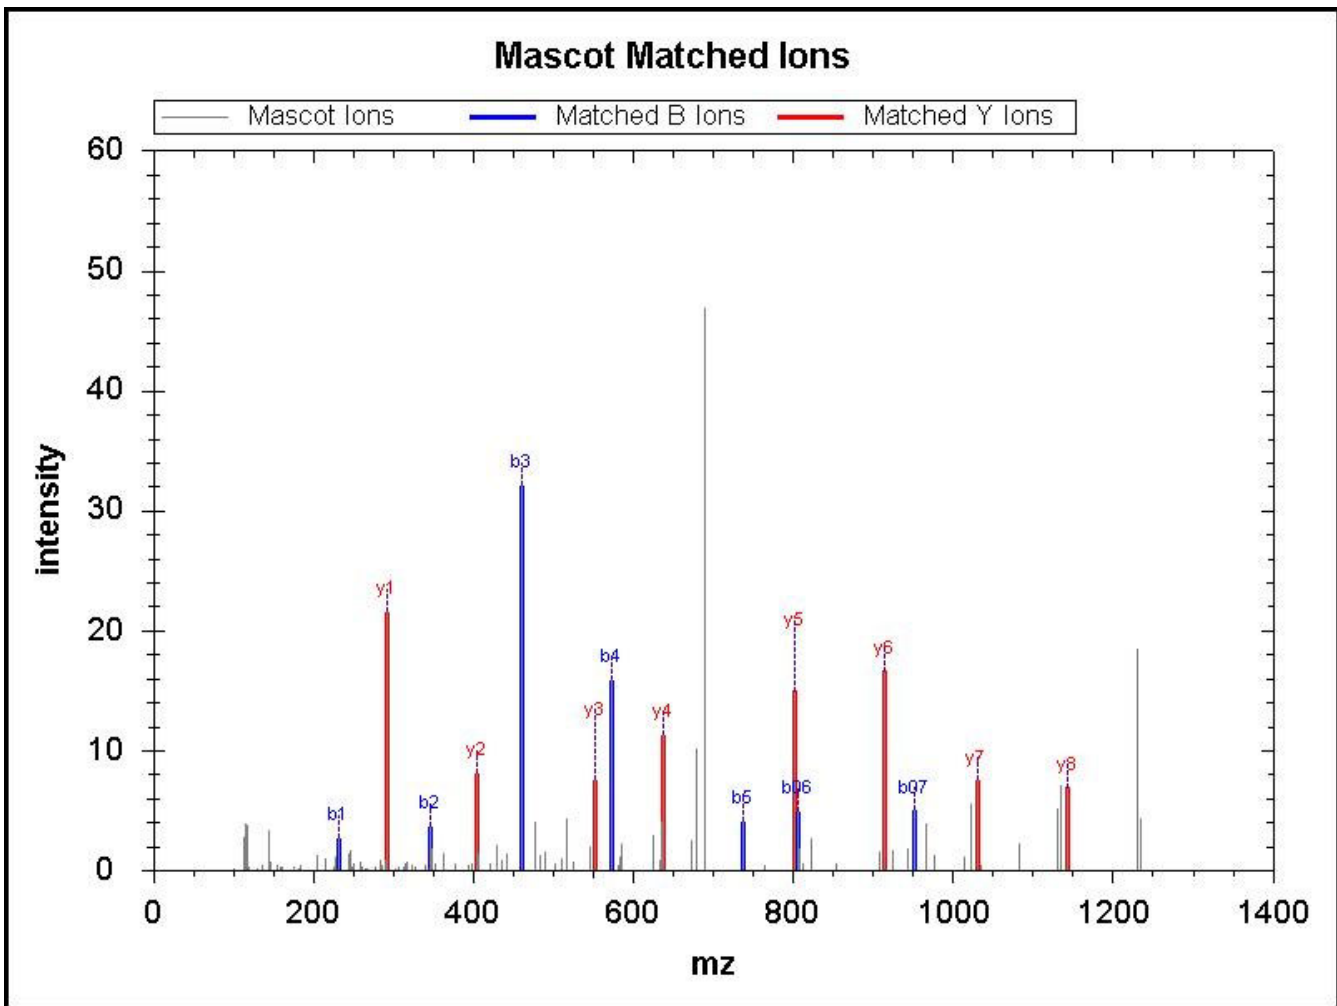

| No | b        | b++    | b0       | b0++   | Seq | y        | y++    | y*       | y*++   | y0       | y0++   | RevNo |
|----|----------|--------|----------|--------|-----|----------|--------|----------|--------|----------|--------|-------|
| 1  | 232.14   | 116.57 | 214.13   | 107.57 | S   |          |        |          |        |          |        | 9     |
| 2  | 345.23   | 173.12 | 327.21   | 164.11 | L   | 1,142.66 | 571.83 | 1,125.63 | 563.32 | 1,124.65 | 562.83 | 8     |
| 3  | 460.25   | 230.63 | 442.24   | 221.62 | D   | 1,029.57 | 515.29 | 1,012.55 | 506.78 | 1,011.56 | 506.29 | 7     |
| 4  | 573.34   | 287.17 | 555.33   | 278.17 | I   | 914.55   | 457.78 | 897.52   | 449.26 | 896.54   | 448.77 | 6     |
| 5  | 736.40   | 368.70 | 718.39   | 359.70 | Y   | 801.46   | 401.23 | 784.44   | 392.72 | 783.45   | 392.23 | 5     |
| 6  | 823.43   | 412.22 | 805.42   | 403.21 | S   | 638.40   | 319.70 | 621.37   | 311.19 | 620.39   | 310.70 | 4     |
| 7  | 970.50   | 485.75 | 952.49   | 476.75 | F   | 551.37   | 276.19 | 534.34   | 267.67 |          |        | 3     |
| 8  | 1,083.58 | 542.30 | 1,065.57 | 533.29 | I   | 404.30   | 202.65 | 387.27   | 194.14 |          |        | 2     |
| 9  |          |        |          |        | K   | 291.21   | 146.11 | 274.19   | 137.60 |          |        | 1     |

Query 68299 Hit 1

MS/MS Fragmentation of **AAPEINNLIIEEATEFIK**

Found in **sp|Q81VP5|FUND1\_HUMAN**, FUN14 domain-containing protein 1 OS=Homo sapiens GN=FUNDC1 PE=1 SV=1

Match to Query 68299: 2189.179from(730.7336,3+)

Title: 1231: Scan 2687 (rt=70.1812, f=2, i=432) [D:\lab212\membrane\Grace\Joyce\iTRAQ\_27\_2\_327.raw]

Data File: Submitted from 20120508-1(merge) by Mascot Daemon on JOYCE-VAIO

Monoisotopic mass of neutral peptide Mr(calc): 2189.179

Variable modifications:

K17 iTRAQ4plex (K)

Ions Score: 59.63 Expect: 0.001

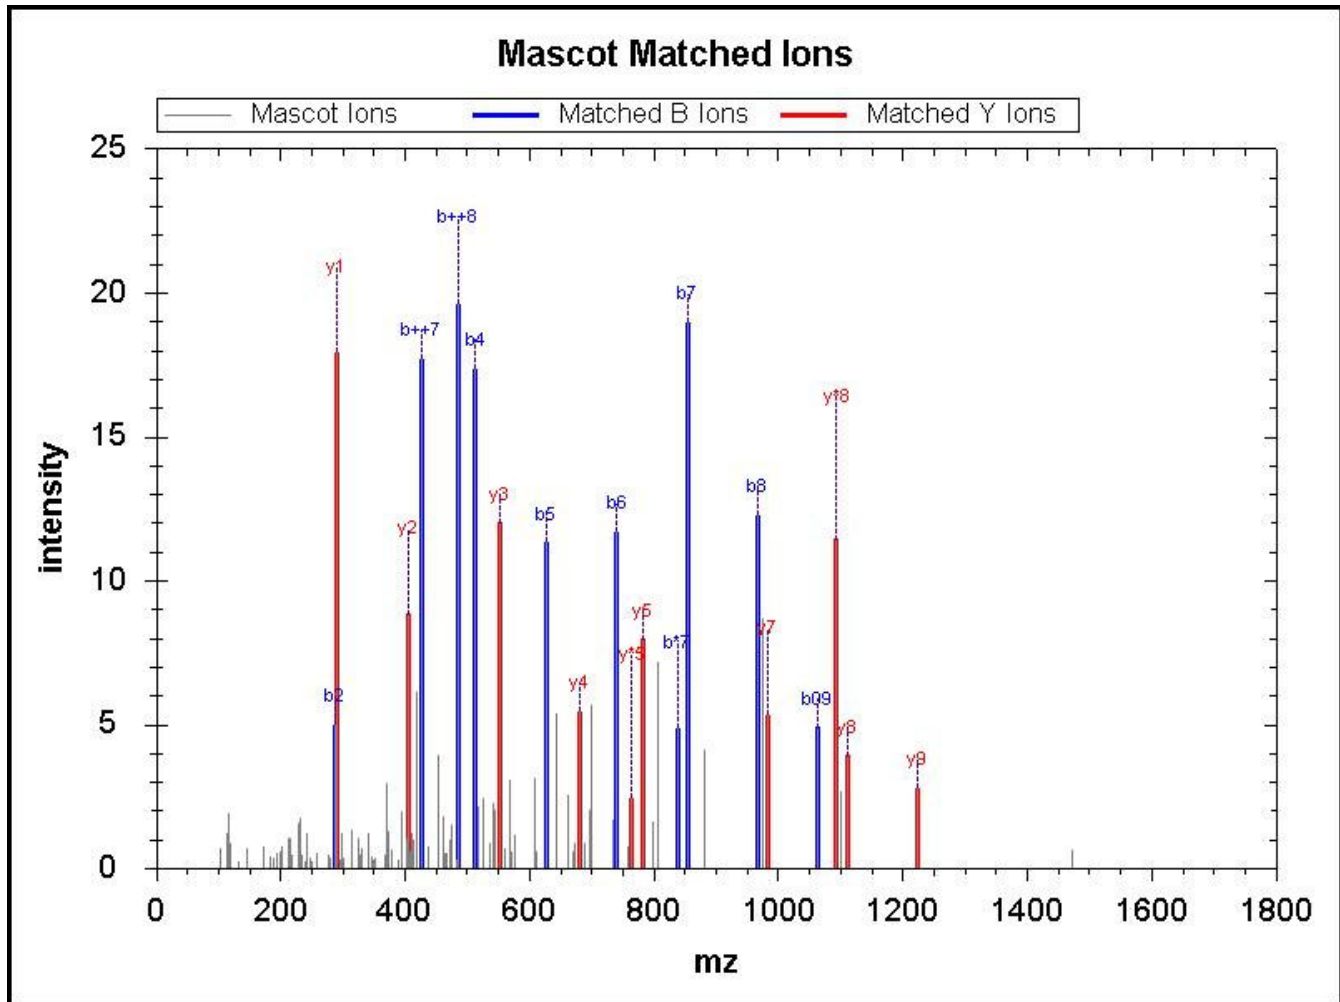



|    |          |        |          |        |          |        |   |        |        |        |        |  |  |   |
|----|----------|--------|----------|--------|----------|--------|---|--------|--------|--------|--------|--|--|---|
| 15 | 1,786.90 | 893.95 | 1,769.87 | 885.44 | 1,768.89 | 884.95 | F | 551.37 | 276.19 | 534.34 | 267.67 |  |  | 3 |
| 16 | 1,899.98 | 950.49 | 1,882.96 | 941.98 | 1,881.97 | 941.49 | I | 404.30 | 202.65 | 387.27 | 194.14 |  |  | 2 |
| 17 |          |        |          |        |          |        | K | 291.21 | 146.11 | 274.19 | 137.60 |  |  | 1 |

Query 23385 Hit 1

MS/MS Fragmentation of **AFLLESLLK**

Found in **sp|Q96JM3|CHAPI\_HUMAN**, Chromosome alignment-maintaining phosphoprotein 1 OS=Homo sapiens GN=CHAPI PE=1 SV=2

Match to Query 23385: 1320.825from(661.4197,2+)

Title: 995: Sum of 2 scans in range 2271 (rt=60.1113, f=4, i=661) to 2272 (rt=60.1367, f=4, i=662)

[D:\lab212\membrane\GraceJoyce\iTRAQ\_29\_1.raw]

Data File: Submitted from 20120508-1(merge) by Mascot Daemon on JOYCE-VAIO

Monoisotopic mass of neutral peptide Mr(calc): 1320.825

Variable modifications:

K9 iTRAQ4plex (K)

Ions Score: 59.58 Expect: 0.000

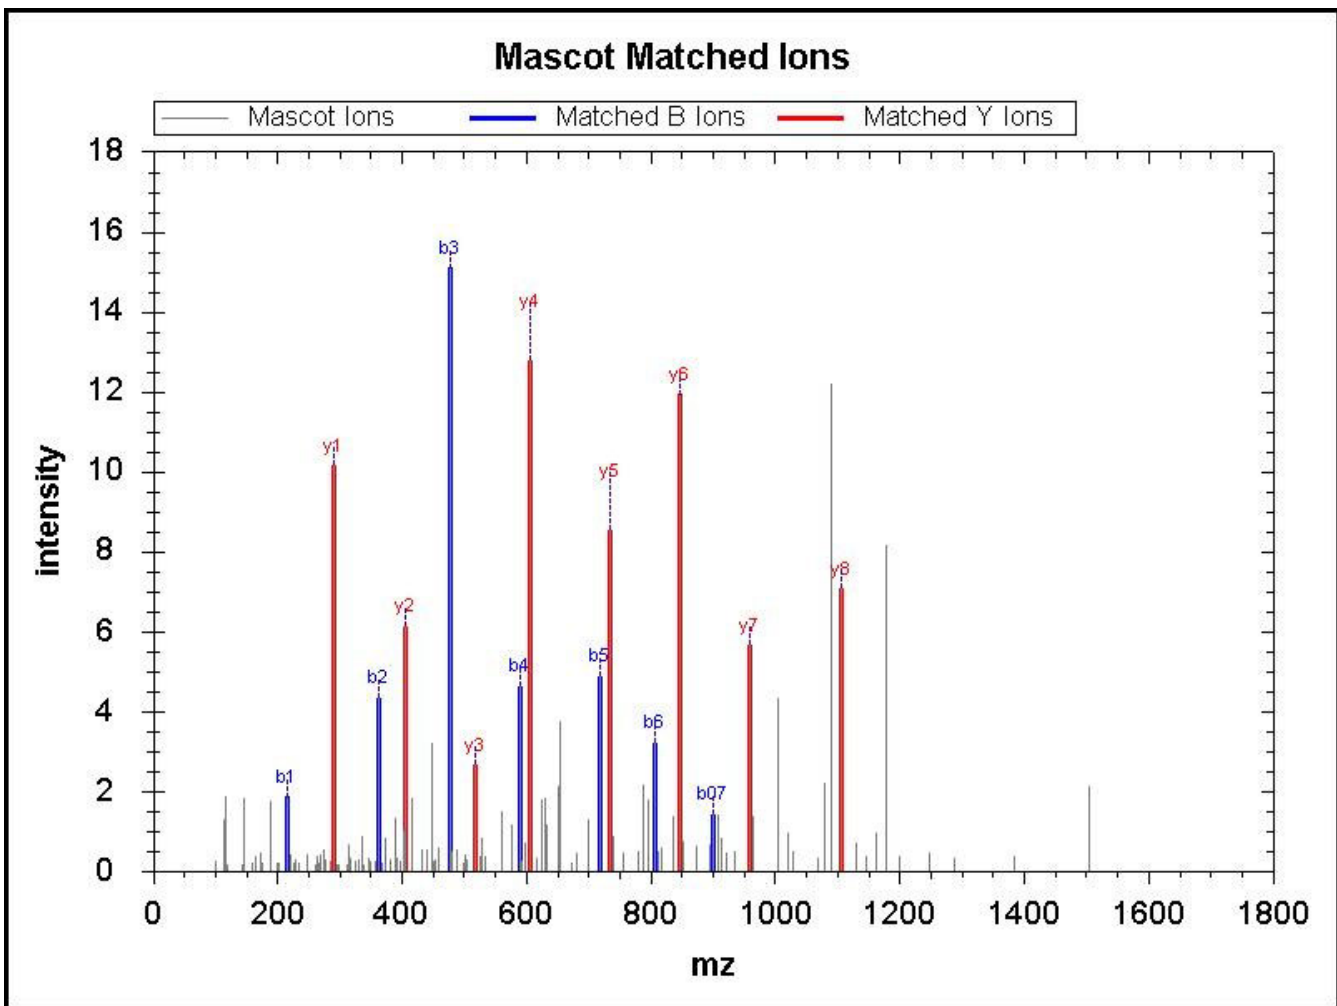

| No | b        | b++    | b0       | b0++   | Seq | y        | y++    | y*       | y*++   | y0       | y0++   | RevNo |
|----|----------|--------|----------|--------|-----|----------|--------|----------|--------|----------|--------|-------|
| 1  | 216.15   | 108.58 |          |        | A   |          |        |          |        |          |        | 9     |
| 2  | 363.21   | 182.11 |          |        | F   | 1,106.69 | 553.85 | 1,089.67 | 545.34 | 1,088.68 | 544.85 | 8     |
| 3  | 476.30   | 238.65 |          |        | L   | 959.63   | 480.32 | 942.60   | 471.80 | 941.62   | 471.31 | 7     |
| 4  | 589.38   | 295.20 |          |        | L   | 846.54   | 423.77 | 829.52   | 415.26 | 828.53   | 414.77 | 6     |
| 5  | 718.43   | 359.72 | 700.42   | 350.71 | E   | 733.46   | 367.23 | 716.43   | 358.72 | 715.45   | 358.23 | 5     |
| 6  | 805.46   | 403.23 | 787.45   | 394.23 | S   | 604.41   | 302.71 | 587.39   | 294.20 | 586.40   | 293.71 | 4     |
| 7  | 918.54   | 459.77 | 900.53   | 450.77 | L   | 517.38   | 259.20 | 500.36   | 250.68 |          |        | 3     |
| 8  | 1,031.63 | 516.32 | 1,013.62 | 507.31 | L   | 404.30   | 202.65 | 387.27   | 194.14 |          |        | 2     |
| 9  |          |        |          |        | K   | 291.21   | 146.11 | 274.19   | 137.60 |          |        | 1     |

MS/MS Fragmentation of **ALNQAESFIGEHHL DHLK**

Found in **sp|P16383|GCFC2\_HUMAN**, GC-rich sequence DNA-binding factor 2 OS=Homo sapiens GN=GCFC2 PE=1 SV=2

Match to Query 74496: 2346.241 from(587.5676,4+)

Title: 630: Scan 1378 (rt=40.792, f=2, i=220) [D:\lab212\membrane\Grace\Joyce\iTRAQ\_54\_1.raw]

Data File: Submitted from 20120508-1(merge) by Mascot Daemon on JOYCE-VAIO

Monoisotopic mass of neutral peptide Mr(calc): 2346.241

Variable modifications:

K18 iTRAQ4plex (K)

Ions Score: 59.57 Expect: 0.001

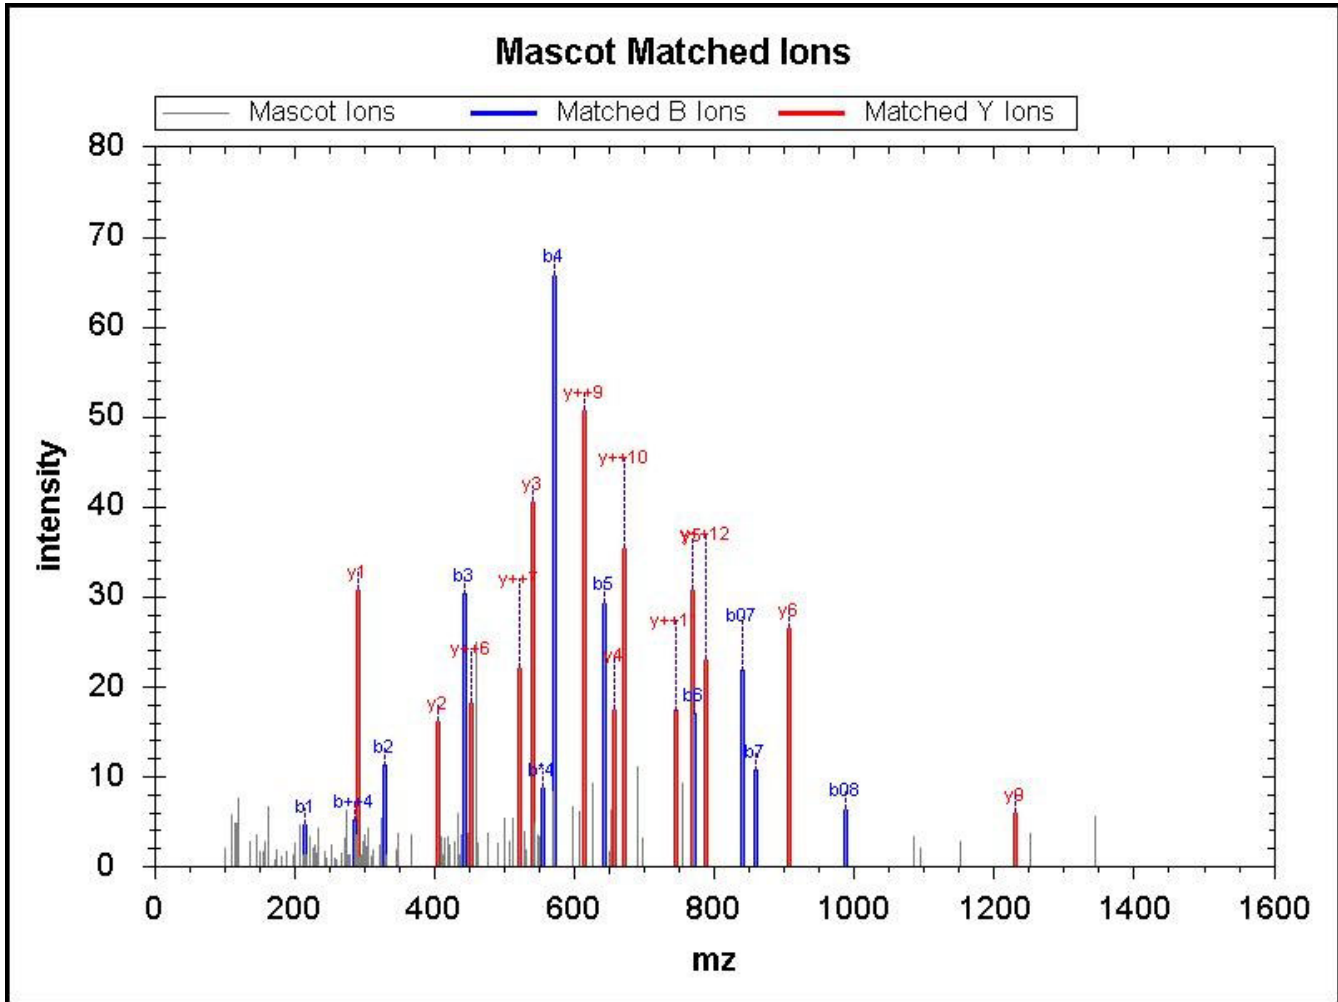

| No | b        | b++    | b*       | b*++   | b0       | b0++   | Seq | y        | y++      | y*       | y*++     | y0       | y0++     | RevNo |
|----|----------|--------|----------|--------|----------|--------|-----|----------|----------|----------|----------|----------|----------|-------|
| 1  | 216.15   | 108.58 |          |        |          |        | A   |          |          |          |          |          |          | 18    |
| 2  | 329.23   | 165.12 |          |        |          |        | L   | 2,132.10 | 1,066.55 | 2,115.07 | 1,058.04 | 2,114.09 | 1,057.55 | 17    |
| 3  | 443.27   | 222.14 | 426.25   | 213.63 |          |        | N   | 2,019.02 | 1,010.01 | 2,001.99 | 1,001.50 | 2,001.01 | 1,001.01 | 16    |
| 4  | 571.33   | 286.17 | 554.31   | 277.66 |          |        | Q   | 1,904.97 | 952.99   | 1,887.95 | 944.48   | 1,886.96 | 943.99   | 15    |
| 5  | 642.37   | 321.69 | 625.34   | 313.17 |          |        | A   | 1,776.91 | 888.96   | 1,759.89 | 880.45   | 1,758.90 | 879.96   | 14    |
| 6  | 771.41   | 386.21 | 754.39   | 377.70 | 753.40   | 377.20 | E   | 1,705.88 | 853.44   | 1,688.85 | 844.93   | 1,687.87 | 844.44   | 13    |
| 7  | 858.44   | 429.73 | 841.42   | 421.21 | 840.43   | 420.72 | S   | 1,576.84 | 788.92   | 1,559.81 | 780.41   | 1,558.82 | 779.92   | 12    |
| 8  | 1,005.51 | 503.26 | 988.49   | 494.75 | 987.50   | 494.25 | F   | 1,489.80 | 745.41   | 1,472.78 | 736.89   | 1,471.79 | 736.40   | 11    |
| 9  | 1,118.60 | 559.80 | 1,101.57 | 551.29 | 1,100.59 | 550.80 | I   | 1,342.73 | 671.87   | 1,325.71 | 663.36   | 1,324.72 | 662.87   | 10    |
| 10 | 1,175.62 | 588.31 | 1,158.59 | 579.80 | 1,157.61 | 579.31 | G   | 1,229.65 | 615.33   | 1,212.62 | 606.82   | 1,211.64 | 606.32   | 9     |
| 11 | 1,304.66 | 652.83 | 1,287.63 | 644.32 | 1,286.65 | 643.83 | E   | 1,172.63 | 586.82   | 1,155.60 | 578.30   | 1,154.62 | 577.81   | 8     |
| 12 | 1,441.72 | 721.36 | 1,424.69 | 712.85 | 1,423.71 | 712.36 | H   | 1,043.59 | 522.30   | 1,026.56 | 513.78   | 1,025.58 | 513.29   | 7     |
| 13 | 1,578.78 | 789.89 | 1,561.75 | 781.38 | 1,560.77 | 780.89 | H   | 906.53   | 453.77   | 889.50   | 445.25   | 888.52   | 444.76   | 6     |
| 14 | 1,691.86 | 846.43 | 1,674.84 | 837.92 | 1,673.85 | 837.43 | L   | 769.47   | 385.24   | 752.44   | 376.72   | 751.46   | 376.23   | 5     |
| 15 | 1,806.89 | 903.95 | 1,789.86 | 895.44 | 1,788.88 | 894.94 | D   | 656.38   | 328.70   | 639.36   | 320.18   | 638.37   | 319.69   | 4     |

|    |          |          |          |          |          |          |   |        |        |        |        |  |  |   |
|----|----------|----------|----------|----------|----------|----------|---|--------|--------|--------|--------|--|--|---|
| 16 | 1,943.95 | 972.48   | 1,926.92 | 963.96   | 1,925.94 | 963.47   | H | 541.36 | 271.18 | 524.33 | 262.67 |  |  | 3 |
| 17 | 2,057.03 | 1,029.02 | 2,040.01 | 1,020.51 | 2,039.02 | 1,020.01 | L | 404.30 | 202.65 | 387.27 | 194.14 |  |  | 2 |
| 18 |          |          |          |          |          |          | K | 291.21 | 146.11 | 274.19 | 137.60 |  |  | 1 |

Query 34142 Hit 1

MS/MS Fragmentation of **VLLDFLMEEK**

Found in **sp|Q9BSJ2|GCP2\_HUMAN**, Gamma-tubulin complex component 2 OS=Homo sapiens GN=TUBGCP2 PE=1 SV=2

Match to Query 34142: 1523.855from(762.9347,2+)

Title: 1043: Scan 2316 (rt=61.5244, f=3, i=353) [D:\lab212\membrane\Grace\Joyce\iTRAQ\_28\_1\_327.raw]

Data File: Submitted from 20120508-1(merge) by Mascot Daemon on JOYCE-VAIO

Monoisotopic mass of neutral peptide Mr(calc): 1523.855

Variable modifications:

K10 iTRAQ4plex (K)

Ions Score: 59.53 Expect: 0.001

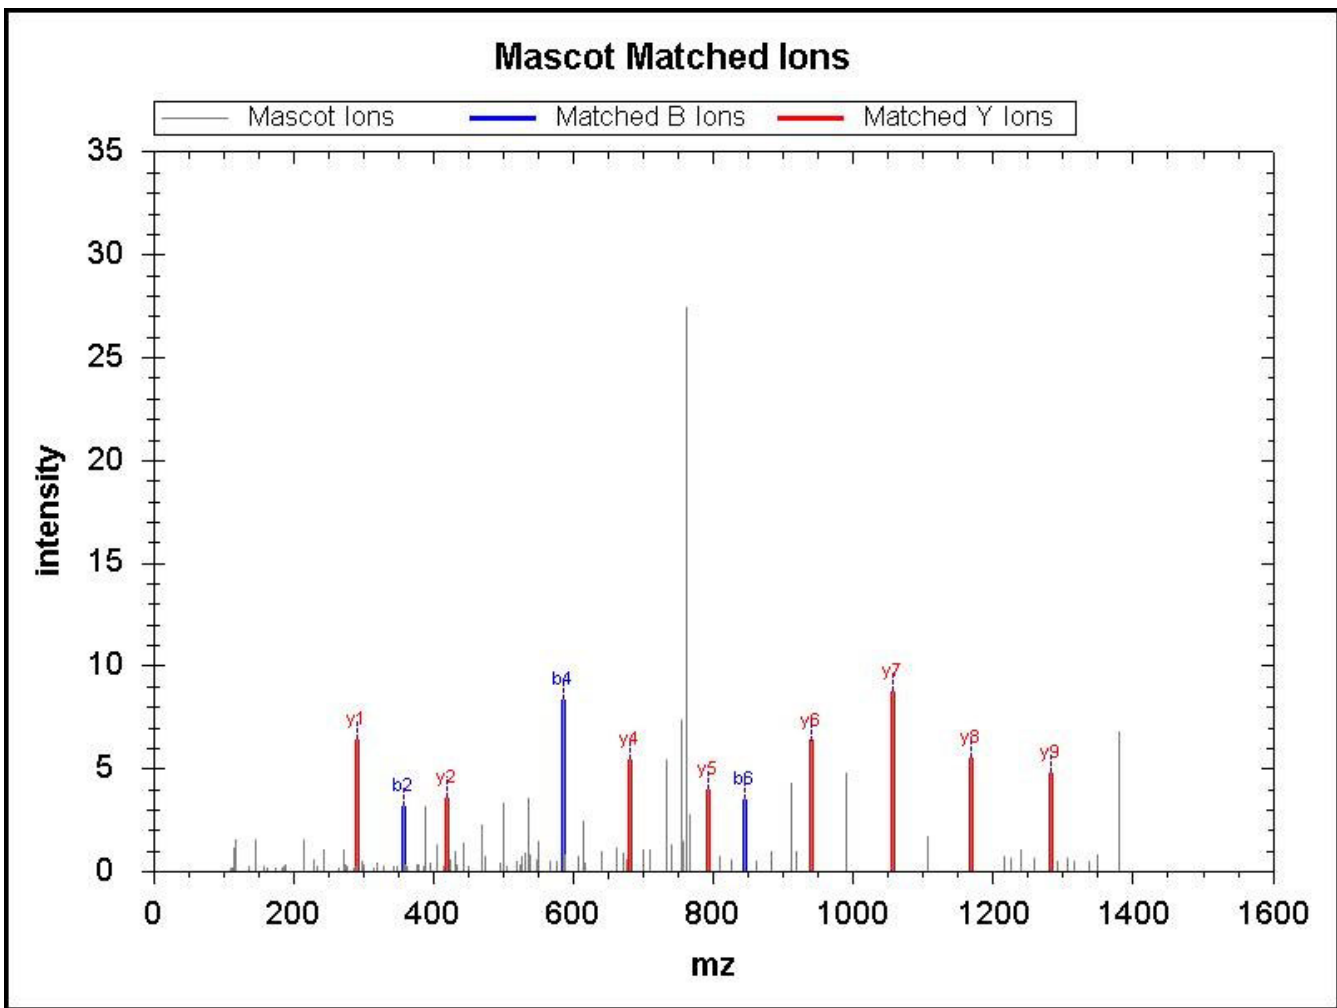

| No | b        | b++    | b0       | b0++   | Seq | y        | y++    | y*       | y*++   | y0       | y0++   | RevNo |
|----|----------|--------|----------|--------|-----|----------|--------|----------|--------|----------|--------|-------|
| 1  | 244.18   | 122.59 |          |        | V   |          |        |          |        |          |        | 10    |
| 2  | 357.26   | 179.13 |          |        | L   | 1,281.69 | 641.35 | 1,264.66 | 632.83 | 1,263.68 | 632.34 | 9     |
| 3  | 470.35   | 235.68 |          |        | L   | 1,168.60 | 584.81 | 1,151.58 | 576.29 | 1,150.59 | 575.80 | 8     |
| 4  | 585.37   | 293.19 | 567.36   | 284.18 | D   | 1,055.52 | 528.26 | 1,038.49 | 519.75 | 1,037.51 | 519.26 | 7     |
| 5  | 732.44   | 366.72 | 714.43   | 357.72 | F   | 940.49   | 470.75 | 923.47   | 462.24 | 922.48   | 461.74 | 6     |
| 6  | 845.53   | 423.27 | 827.51   | 414.26 | L   | 793.42   | 397.22 | 776.40   | 388.70 | 775.41   | 388.21 | 5     |
| 7  | 976.57   | 488.79 | 958.56   | 479.78 | M   | 680.34   | 340.67 | 663.31   | 332.16 | 662.33   | 331.67 | 4     |
| 8  | 1,105.61 | 553.31 | 1,087.60 | 544.30 | E   | 549.30   | 275.15 | 532.27   | 266.64 | 531.29   | 266.15 | 3     |
| 9  | 1,234.65 | 617.83 | 1,216.64 | 608.82 | E   | 420.26   | 210.63 | 403.23   | 202.12 | 402.25   | 201.63 | 2     |
| 10 |          |        |          |        | K   | 291.21   | 146.11 | 274.19   | 137.60 |          |        | 1     |

Query 77986 Hit 1

MS/MS Fragmentation of **IMGLDLPDGGHLTHGFMTDK**

Found in **sp|P34896|GLYC\_HUMAN**, Serine hydroxymethyltransferase

Match to Query 77986: 2442.235from(611.566,4+)

Title: 782: Scan 1804 (rt=50.0998, f=3, i=280) [D:\lab212\membrane\Grace\Joyce\47\_1.raw]

Data File: Submitted from 20120508-1(merge) by Mascot Daemon on JOYCE-VAIO

Monoisotopic mass of neutral peptide Mr(calc): 2442.235

Variable modifications:

K20 iTRAQ4plex (K)

Ions Score: 59.48 Expect: 0.001

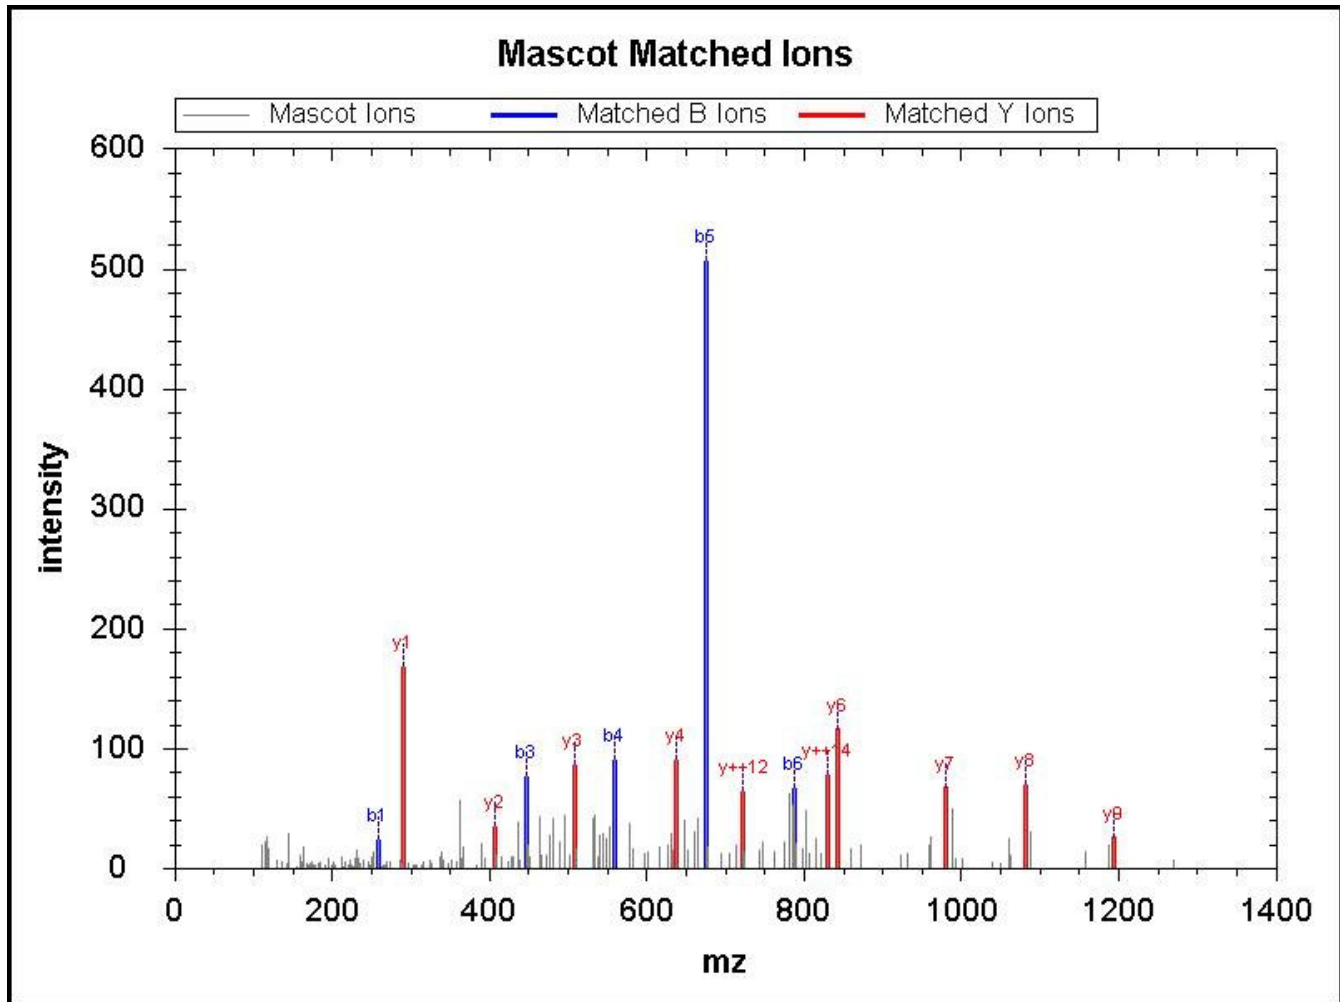

| No | b        | b++    | b0       | b0++   | Seq | y        | y++      | y*       | y*++     | y0       | y0++     | RevNo |
|----|----------|--------|----------|--------|-----|----------|----------|----------|----------|----------|----------|-------|
| 1  | 258.19   | 129.60 |          |        | I   |          |          |          |          |          |          | 20    |
| 2  | 389.23   | 195.12 |          |        | M   | 2,186.05 | 1,093.53 | 2,169.02 | 1,085.02 | 2,168.04 | 1,084.52 | 19    |
| 3  | 446.26   | 223.63 |          |        | G   | 2,055.01 | 1,028.01 | 2,037.98 | 1,019.49 | 2,037.00 | 1,019.00 | 18    |
| 4  | 559.34   | 280.17 |          |        | L   | 1,997.99 | 999.50   | 1,980.96 | 990.98   | 1,979.98 | 990.49   | 17    |
| 5  | 674.37   | 337.69 | 656.36   | 328.68 | D   | 1,884.90 | 942.96   | 1,867.88 | 934.44   | 1,866.89 | 933.95   | 16    |
| 6  | 787.45   | 394.23 | 769.44   | 385.22 | L   | 1,769.88 | 885.44   | 1,752.85 | 876.93   | 1,751.87 | 876.44   | 15    |
| 7  | 884.50   | 442.76 | 866.49   | 433.75 | P   | 1,656.79 | 828.90   | 1,639.77 | 820.39   | 1,638.78 | 819.89   | 14    |
| 8  | 999.53   | 500.27 | 981.52   | 491.26 | D   | 1,559.74 | 780.37   | 1,542.71 | 771.86   | 1,541.73 | 771.37   | 13    |
| 9  | 1,056.55 | 528.78 | 1,038.54 | 519.77 | G   | 1,444.71 | 722.86   | 1,427.69 | 714.35   | 1,426.70 | 713.85   | 12    |
| 10 | 1,113.57 | 557.29 | 1,095.56 | 548.28 | G   | 1,387.69 | 694.35   | 1,370.66 | 685.84   | 1,369.68 | 685.34   | 11    |
| 11 | 1,250.63 | 625.82 | 1,232.62 | 616.81 | H   | 1,330.67 | 665.84   | 1,313.64 | 657.33   | 1,312.66 | 656.83   | 10    |
| 12 | 1,363.72 | 682.36 | 1,345.71 | 673.36 | L   | 1,193.61 | 597.31   | 1,176.58 | 588.80   | 1,175.60 | 588.30   | 9     |
| 13 | 1,464.76 | 732.89 | 1,446.75 | 723.88 | T   | 1,080.53 | 540.77   | 1,063.50 | 532.25   | 1,062.52 | 531.76   | 8     |
| 14 | 1,601.82 | 801.42 | 1,583.81 | 792.41 | H   | 979.48   | 490.24   | 962.45   | 481.73   | 961.47   | 481.24   | 7     |

|    |          |          |          |          |   |        |        |        |        |        |        |   |
|----|----------|----------|----------|----------|---|--------|--------|--------|--------|--------|--------|---|
| 15 | 1,658.84 | 829.93   | 1,640.83 | 820.92   | G | 842.42 | 421.71 | 825.39 | 413.20 | 824.41 | 412.71 | 6 |
| 16 | 1,805.91 | 903.46   | 1,787.90 | 894.45   | F | 785.40 | 393.20 | 768.37 | 384.69 | 767.39 | 384.20 | 5 |
| 17 | 1,936.95 | 968.98   | 1,918.94 | 959.97   | M | 638.33 | 319.67 | 621.30 | 311.16 | 620.32 | 310.66 | 4 |
| 18 | 2,038.00 | 1,019.50 | 2,019.99 | 1,010.50 | T | 507.29 | 254.15 | 490.26 | 245.64 | 489.28 | 245.14 | 3 |
| 19 | 2,153.03 | 1,077.02 | 2,135.02 | 1,068.01 | D | 406.24 | 203.62 | 389.22 | 195.11 | 388.23 | 194.62 | 2 |
| 20 |          |          |          |          | K | 291.21 | 146.11 | 274.19 | 137.60 |        |        | 1 |

Query 54669 Hit 1

MS/MS Fragmentation of **LLSAGEDTFVHIWK**

Found in [sp|Q9H977|WDR54\\_HUMAN](#), WD repeat-containing protein 54 OS=Homo sapiens GN=WDR54 PE=1 SV=1

Match to Query 54669: 1903.008from(635.3433,3+)

Title: 890: Sum of 2 scans in range 1926 (rt=53.1424, f=4, i=601) to 1927 (rt=53.1679, f=4, i=602)

[D:\lab212\membrane\GraceJoyce\iTRAQ40.raw]

Data File: Submitted from 20120508-1(merge) by Mascot Daemon on JOYCE-VAIO

Monoisotopic mass of neutral peptide Mr(calc): 1903.008

Variable modifications:

K14 :iTRAQ4plex (K)

Ions Score: 59.33 Expect: 0.001

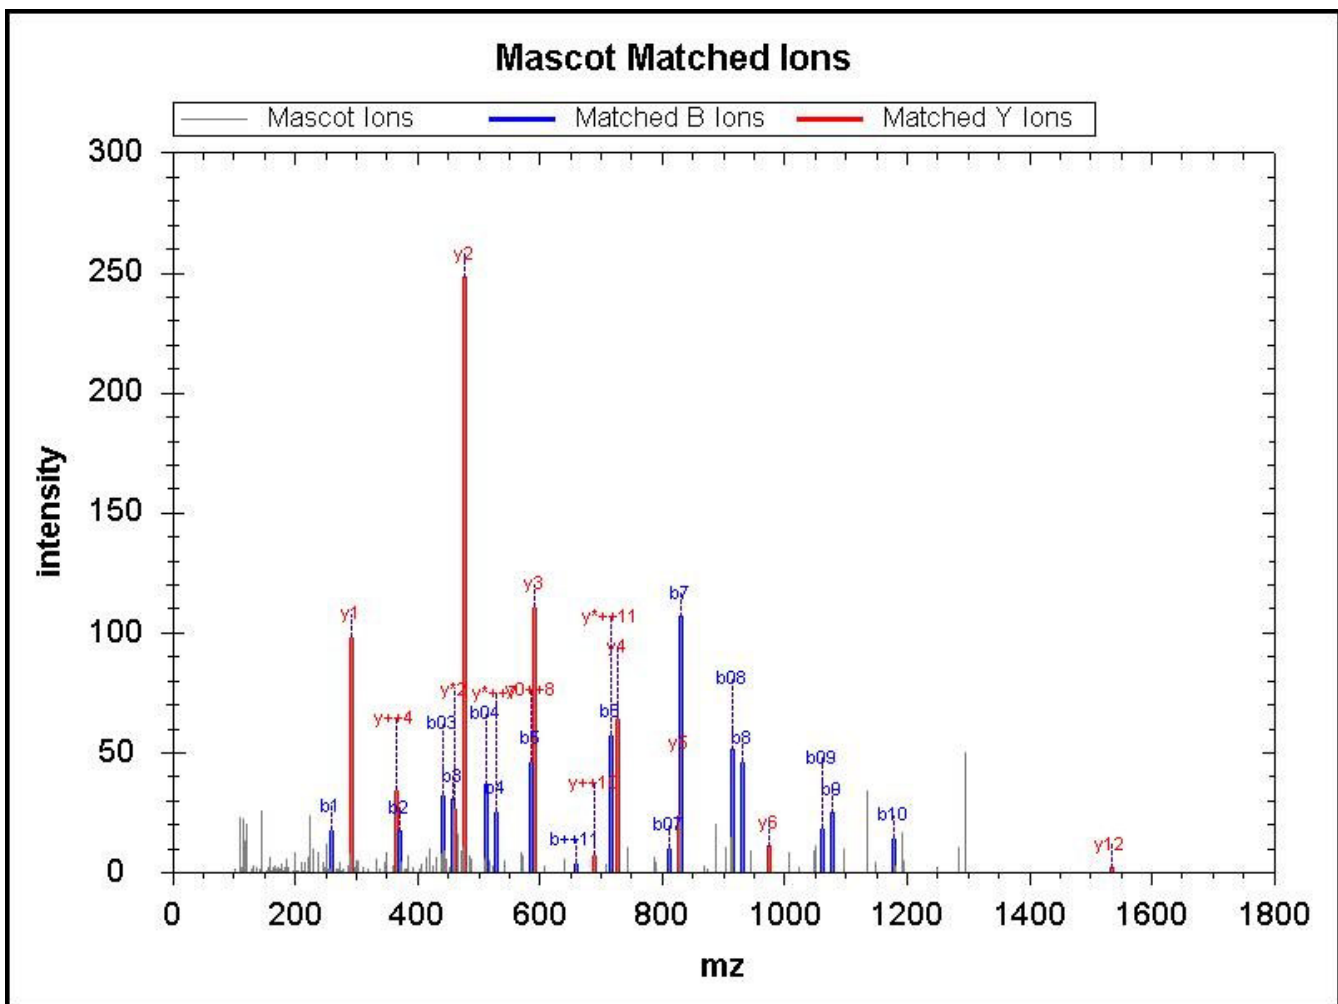

|    |          |        |          |        |   |          |        |          |        |          |        |   |
|----|----------|--------|----------|--------|---|----------|--------|----------|--------|----------|--------|---|
| 8  | 931.49   | 466.25 | 913.47   | 457.24 | T | 1,074.62 | 537.81 | 1,057.60 | 529.30 | 1,056.61 | 528.81 | 7 |
| 9  | 1,078.55 | 539.78 | 1,060.54 | 530.78 | F | 973.57   | 487.29 | 956.55   | 478.78 |          |        | 6 |
| 10 | 1,177.62 | 589.31 | 1,159.61 | 580.31 | V | 826.51   | 413.76 | 809.48   | 405.24 |          |        | 5 |
| 11 | 1,314.68 | 657.84 | 1,296.67 | 648.84 | H | 727.44   | 364.22 | 710.41   | 355.71 |          |        | 4 |
| 12 | 1,427.77 | 714.39 | 1,409.75 | 705.38 | I | 590.38   | 295.69 | 573.35   | 287.18 |          |        | 3 |
| 13 | 1,613.84 | 807.43 | 1,595.83 | 798.42 | W | 477.29   | 239.15 | 460.27   | 230.64 |          |        | 2 |
| 14 |          |        |          |        | K | 291.21   | 146.11 | 274.19   | 137.60 |          |        | 1 |

Query 69833 Hit 1

MS/MS Fragmentation of ALLEAFDNLKDEMFR

Found in sp|P82094|TMF1\_HUMAN, TATA element modulatory factor OS=Homo sapiens GN=TMF1 PE=1 SV=2

Match to Query 69833: 2228.143from(743.7216,3+)

Title: 1162: Sum of 2 scans in range 2670 (rt=69.0854, f=2, i=449) to 2671 (rt=69.1108, f=2, i=450)

[D:\lab212\membrane\GraceJoyce\iTRAQ\_38\_1.raw]

Data File: Submitted from 20120508-1(merge) by Mascot Daemon on JOYCE-VAIO

Monoisotopic mass of neutral peptide Mr(calc): 2228.143

Variable modifications:

K11 iTRAQ4plex (K)

Ions Score: 59.27 Expect: 0.001

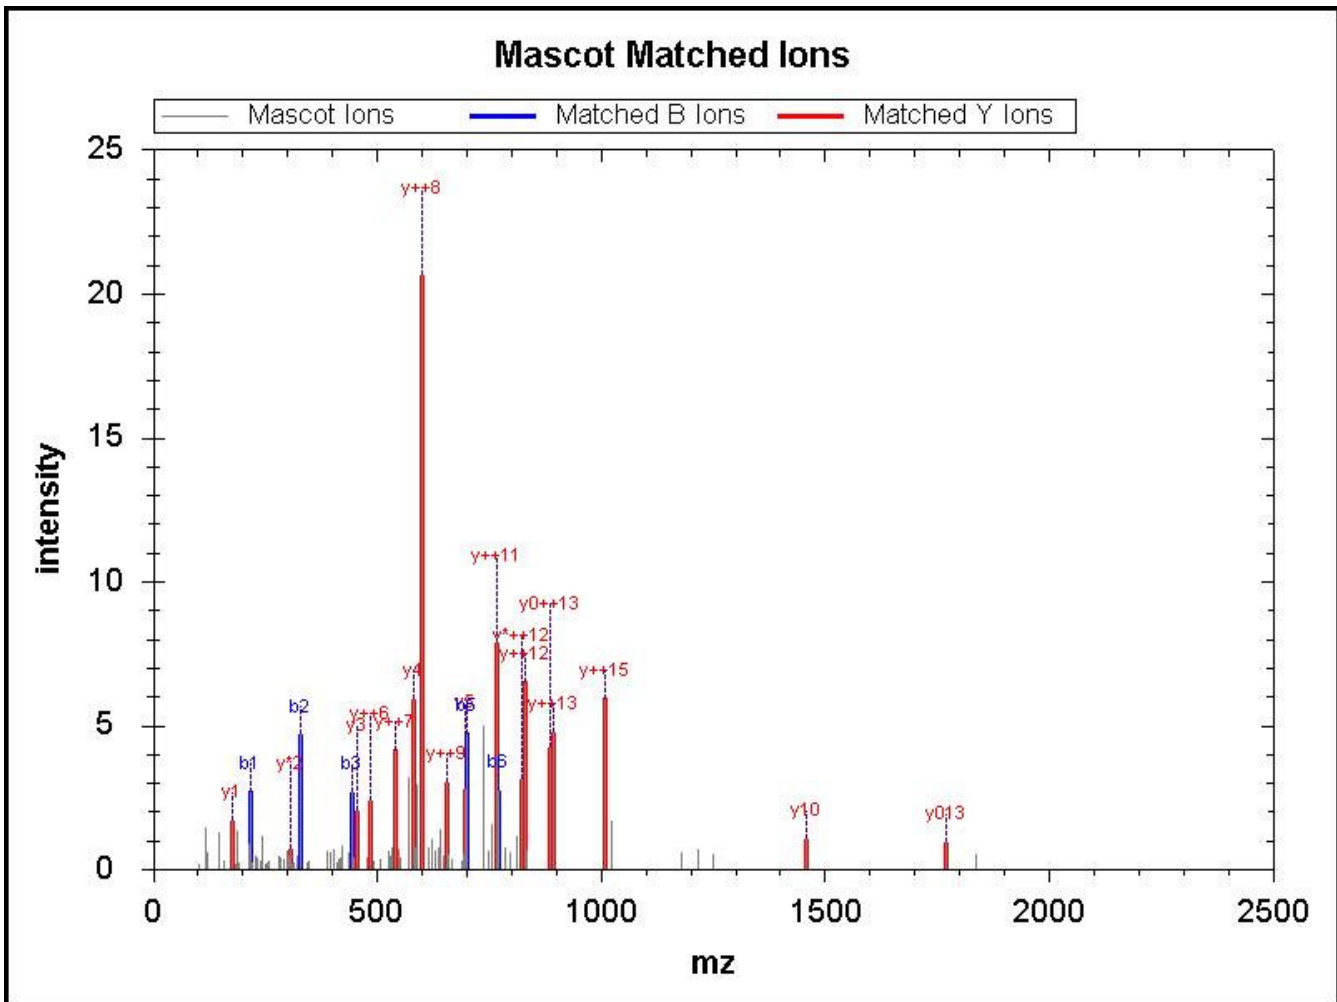

| No | b      | b++    | b* | b*++ | b0     | b0++   | Seq | y        | y++      | y*       | y*++   | y0       | y0++   | RevNo |
|----|--------|--------|----|------|--------|--------|-----|----------|----------|----------|--------|----------|--------|-------|
| 1  | 216.15 | 108.58 |    |      |        |        | A   |          |          |          |        |          |        | 16    |
| 2  | 329.23 | 165.12 |    |      |        |        | L   | 2,014.01 | 1,007.51 | 1,996.98 | 998.99 | 1,996.00 | 998.50 | 15    |
| 3  | 442.31 | 221.66 |    |      |        |        | L   | 1,900.92 | 950.97   | 1,883.90 | 942.45 | 1,882.91 | 941.96 | 14    |
| 4  | 571.36 | 286.18 |    |      | 553.35 | 277.18 | E   | 1,787.84 | 894.42   | 1,770.81 | 885.91 | 1,769.83 | 885.42 | 13    |
| 5  | 700.40 | 350.70 |    |      | 682.39 | 341.70 | E   | 1,658.80 | 829.90   | 1,641.77 | 821.39 | 1,640.79 | 820.90 | 12    |
| 6  | 771.44 | 386.22 |    |      | 753.43 | 377.22 | A   | 1,529.75 | 765.38   | 1,512.73 | 756.87 | 1,511.74 | 756.38 | 11    |

|    |          |          |          |          |          |          |   |          |        |          |        |          |        |    |
|----|----------|----------|----------|----------|----------|----------|---|----------|--------|----------|--------|----------|--------|----|
| 7  | 918.51   | 459.76   |          |          | 900.49   | 450.75   | F | 1,458.72 | 729.86 | 1,441.69 | 721.35 | 1,440.71 | 720.86 | 10 |
| 8  | 1,033.53 | 517.27   |          |          | 1,015.52 | 508.26   | D | 1,311.65 | 656.33 | 1,294.62 | 647.81 | 1,293.64 | 647.32 | 9  |
| 9  | 1,147.58 | 574.29   | 1,130.55 | 565.78   | 1,129.56 | 565.29   | N | 1,196.62 | 598.81 | 1,179.59 | 590.30 | 1,178.61 | 589.81 | 8  |
| 10 | 1,260.66 | 630.83   | 1,243.63 | 622.32   | 1,242.65 | 621.83   | L | 1,082.58 | 541.79 | 1,065.55 | 533.28 | 1,064.57 | 532.79 | 7  |
| 11 | 1,532.86 | 766.93   | 1,515.83 | 758.42   | 1,514.85 | 757.93   | K | 969.49   | 485.25 | 952.47   | 476.74 | 951.48   | 476.25 | 6  |
| 12 | 1,647.88 | 824.45   | 1,630.86 | 815.93   | 1,629.87 | 815.44   | D | 697.30   | 349.15 | 680.27   | 340.64 | 679.29   | 340.15 | 5  |
| 13 | 1,776.93 | 888.97   | 1,759.90 | 880.45   | 1,758.92 | 879.96   | E | 582.27   | 291.64 | 565.24   | 283.13 | 564.26   | 282.63 | 4  |
| 14 | 1,907.97 | 954.49   | 1,890.94 | 945.97   | 1,889.96 | 945.48   | M | 453.23   | 227.12 | 436.20   | 218.60 |          |        | 3  |
| 15 | 2,055.03 | 1,028.02 | 2,038.01 | 1,019.51 | 2,037.02 | 1,019.02 | F | 322.19   | 161.60 | 305.16   | 153.08 |          |        | 2  |
| 16 |          |          |          |          |          |          | R | 175.12   | 88.06  | 158.09   | 79.55  |          |        | 1  |

Query 23952 Hit 1

MS/MS Fragmentation of **MIETAQVDER**

Found in **sp|Q9UL25|RAB21\_HUMAN**, Ras-related protein Rab-21 OS=Homo sapiens GN=RAB21 PE=1 SV=3

Match to Query 23952: 1334.665from(668.3398,2+)

Title: 63: Scan 860 (rt=25.6063, f=2, i=72) [D:\lab212\membrane\GraceJoyce\iTRAQ\_24\_2.raw]

Data File: Submitted from 20120508-1(merge) by Mascot Daemon on JOYCE-VAIO

Monoisotopic mass of neutral peptide Mr(calc): 1334.665

Variable modifications:

Ions Score: 59.13 Expect: 0.001

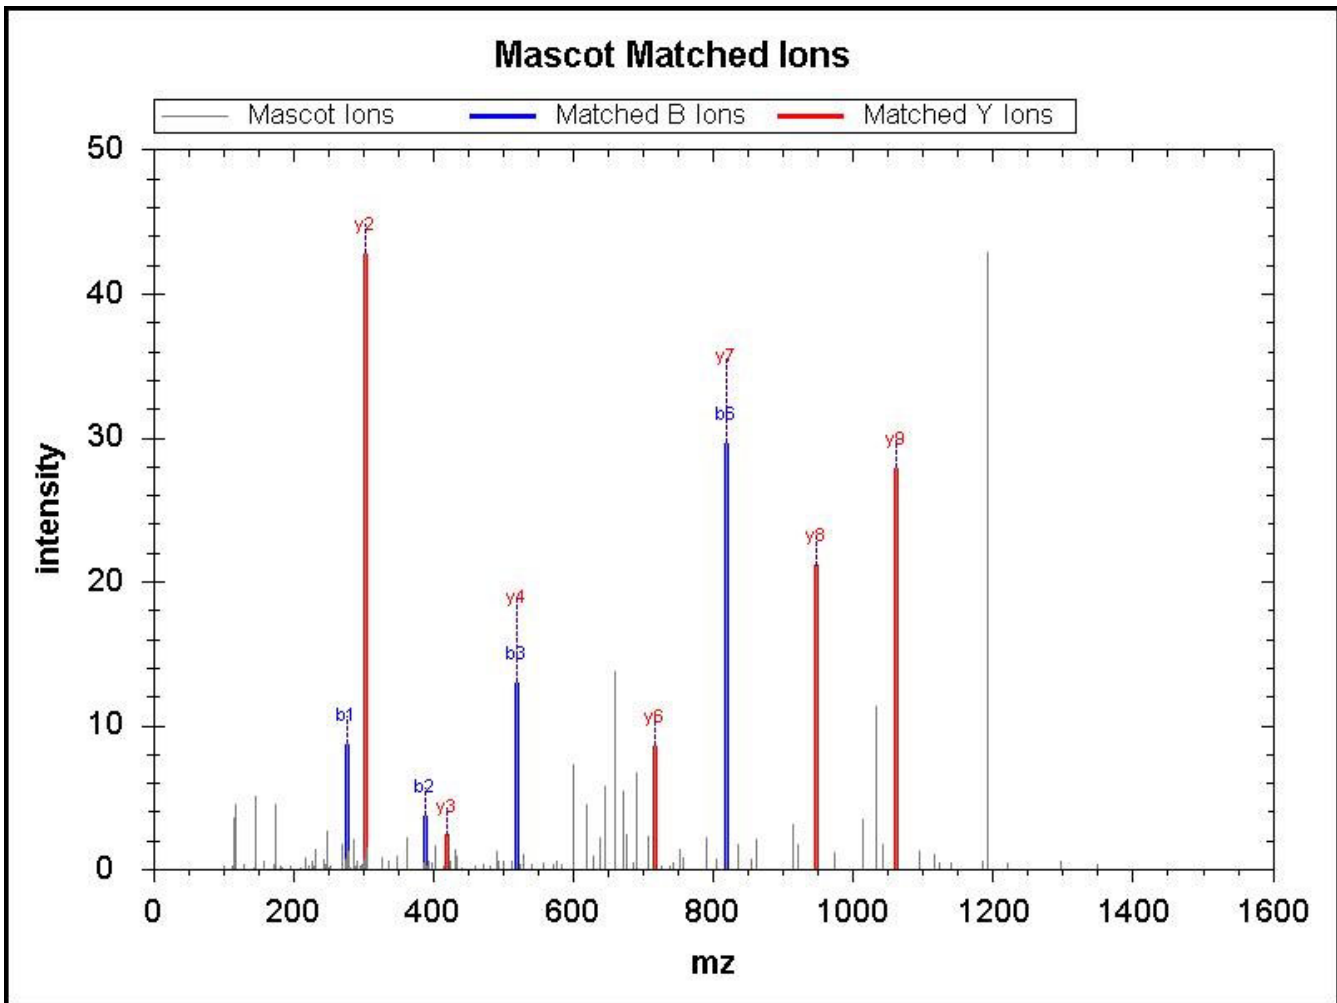

| No | b      | b++    | b* | b*++ | b0     | b0++   | Seq | y        | y++    | y*       | y*++   | y0       | y0++   | RevNo |
|----|--------|--------|----|------|--------|--------|-----|----------|--------|----------|--------|----------|--------|-------|
| 1  | 276.15 | 138.58 |    |      |        |        | M   |          |        |          |        |          |        | 10    |
| 2  | 389.23 | 195.12 |    |      |        |        | I   | 1,060.53 | 530.77 | 1,043.50 | 522.25 | 1,042.52 | 521.76 | 9     |
| 3  | 518.28 | 259.64 |    |      | 500.27 | 250.64 | E   | 947.44   | 474.23 | 930.42   | 465.71 | 929.43   | 465.22 | 8     |
| 4  | 619.32 | 310.17 |    |      | 601.31 | 301.16 | T   | 818.40   | 409.70 | 801.37   | 401.19 | 800.39   | 400.70 | 7     |
| 5  | 690.36 | 345.68 |    |      | 672.35 | 336.68 | A   | 717.35   | 359.18 | 700.33   | 350.67 | 699.34   | 350.17 | 6     |

|    |          |        |          |        |          |        |   |        |        |        |        |        |        |   |
|----|----------|--------|----------|--------|----------|--------|---|--------|--------|--------|--------|--------|--------|---|
| 6  | 818.42   | 409.71 | 801.39   | 401.20 | 800.41   | 400.71 | Q | 646.32 | 323.66 | 629.29 | 315.15 | 628.30 | 314.66 | 5 |
| 7  | 917.49   | 459.25 | 900.46   | 450.73 | 899.48   | 450.24 | V | 518.26 | 259.63 | 501.23 | 251.12 | 500.25 | 250.63 | 4 |
| 8  | 1,032.52 | 516.76 | 1,015.49 | 508.25 | 1,014.50 | 507.76 | D | 419.19 | 210.10 | 402.16 | 201.58 | 401.18 | 201.09 | 3 |
| 9  | 1,161.56 | 581.28 | 1,144.53 | 572.77 | 1,143.55 | 572.28 | E | 304.16 | 152.58 | 287.13 | 144.07 | 286.15 | 143.58 | 2 |
| 10 |          |        |          |        |          |        | R | 175.12 | 88.06  | 158.09 | 79.55  |        |        | 1 |

Query 59445 Hit 1

MS/MS Fragmentation of **NPHPSSAFLNLIGFVSR**

Found in **sp|P53004|BIEA\_HUMAN**, Biliverdin reductase A OS=Homo sapiens GN=BLVRA PE=1 SV=2

Match to Query 59445: 1999.068from(667.3633,3+)

Title: 981: Sum of 2 scans in range 2168 (rt=58.2533, f=4, i=655) to 2169 (rt=58.2788, f=4, i=656)

[D:\lab212\membrane\GraceJoyce\iTRAQ\_36\_2.raw]

Data File: Submitted from 20120508-1(merge) by Mascot Daemon on JOYCE-VAIO

Monoisotopic mass of neutral peptide Mr(calc): 1999.068

Variable modifications:

Ions Score: 58.9 Expect: 0.001

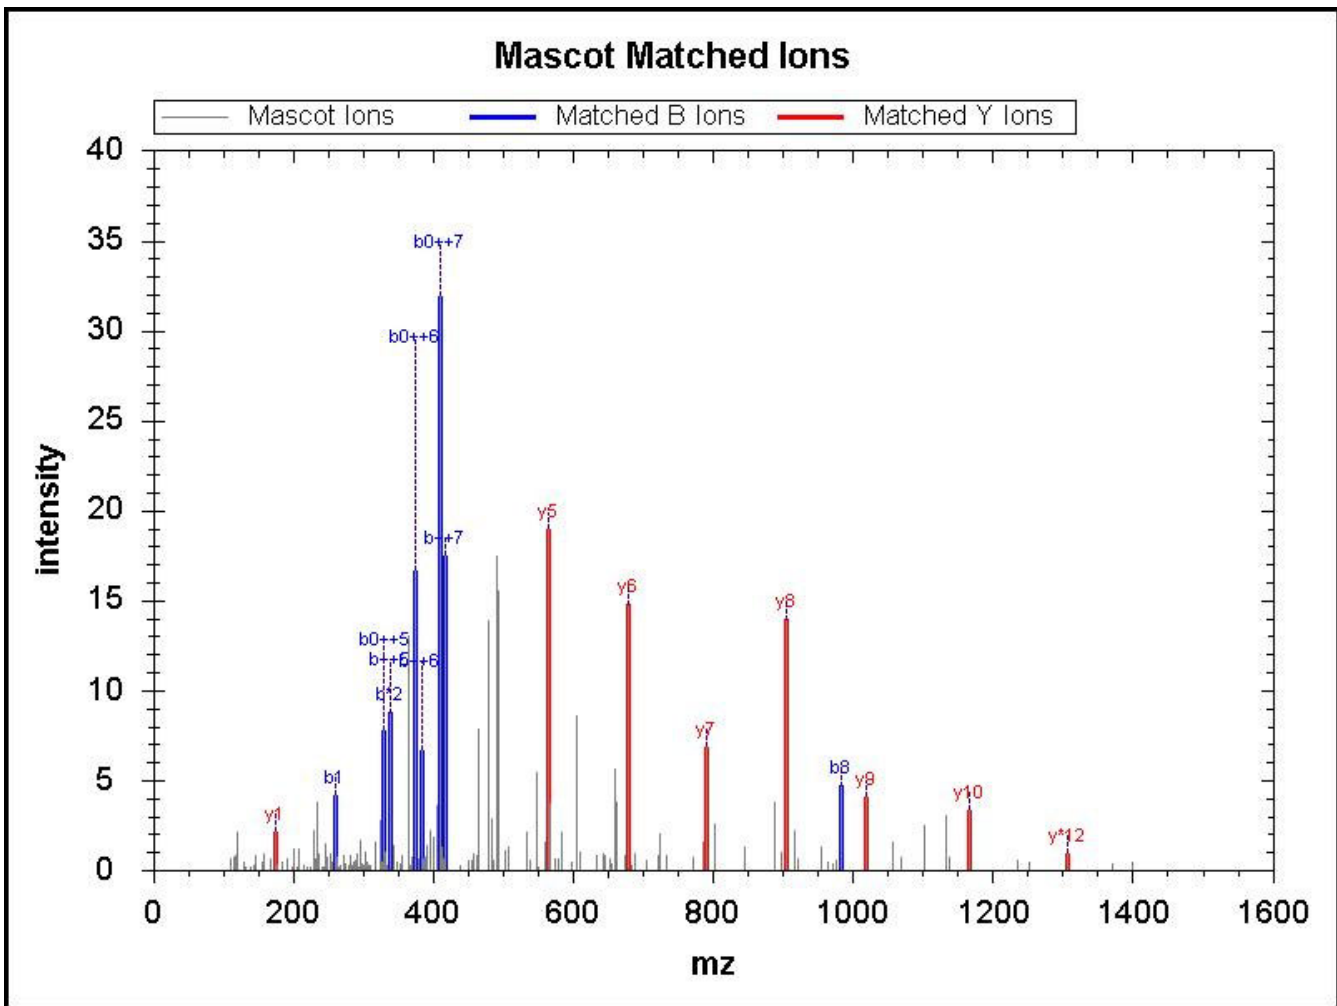

| No | b      | b++    | b*     | b*++   | b0     | b0++   | Seq | y        | y++    | y*       | y*++   | y0       | y0++   | RevNo |
|----|--------|--------|--------|--------|--------|--------|-----|----------|--------|----------|--------|----------|--------|-------|
| 1  | 259.15 | 130.08 | 242.13 | 121.57 |        |        | N   |          |        |          |        |          |        | 17    |
| 2  | 356.21 | 178.61 | 339.18 | 170.09 |        |        | P   | 1,741.94 | 871.47 | 1,724.91 | 862.96 | 1,723.93 | 862.47 | 16    |
| 3  | 493.26 | 247.14 | 476.24 | 238.62 |        |        | H   | 1,644.89 | 822.95 | 1,627.86 | 814.43 | 1,626.87 | 813.94 | 15    |
| 4  | 590.32 | 295.66 | 573.29 | 287.15 |        |        | P   | 1,507.83 | 754.42 | 1,490.80 | 745.90 | 1,489.82 | 745.41 | 14    |
| 5  | 677.35 | 339.18 | 660.32 | 330.66 | 659.34 | 330.17 | S   | 1,410.77 | 705.89 | 1,393.75 | 697.38 | 1,392.76 | 696.89 | 13    |
| 6  | 764.38 | 382.69 | 747.35 | 374.18 | 746.37 | 373.69 | S   | 1,323.74 | 662.37 | 1,306.72 | 653.86 | 1,305.73 | 653.37 | 12    |
| 7  | 835.42 | 418.21 | 818.39 | 409.70 | 817.41 | 409.21 | A   | 1,236.71 | 618.86 | 1,219.68 | 610.35 | 1,218.70 | 609.85 | 11    |
| 8  | 982.49 | 491.75 | 965.46 | 483.23 | 964.48 | 482.74 | F   | 1,165.67 | 583.34 | 1,148.65 | 574.83 | 1,147.66 | 574.33 | 10    |



|    |          |        |          |        |          |        |   |          |        |          |        |          |        |   |
|----|----------|--------|----------|--------|----------|--------|---|----------|--------|----------|--------|----------|--------|---|
| 9  | 1,095.57 | 548.29 | 1,078.54 | 539.78 | 1,077.56 | 539.28 | L | 1,018.60 | 509.81 | 1,001.58 | 501.29 | 1,000.59 | 500.80 | 9 |
| 10 | 1,209.61 | 605.31 | 1,192.59 | 596.80 | 1,191.60 | 596.31 | N | 905.52   | 453.26 | 888.49   | 444.75 | 887.51   | 444.26 | 8 |
| 11 | 1,322.70 | 661.85 | 1,305.67 | 653.34 | 1,304.69 | 652.85 | L | 791.48   | 396.24 | 774.45   | 387.73 | 773.47   | 387.24 | 7 |
| 12 | 1,435.78 | 718.39 | 1,418.76 | 709.88 | 1,417.77 | 709.39 | I | 678.39   | 339.70 | 661.37   | 331.19 | 660.38   | 330.70 | 6 |
| 13 | 1,492.80 | 746.91 | 1,475.78 | 738.39 | 1,474.79 | 737.90 | G | 565.31   | 283.16 | 548.28   | 274.64 | 547.30   | 274.15 | 5 |
| 14 | 1,639.87 | 820.44 | 1,622.85 | 811.93 | 1,621.86 | 811.43 | F | 508.29   | 254.65 | 491.26   | 246.13 | 490.28   | 245.64 | 4 |
| 15 | 1,738.94 | 869.97 | 1,721.91 | 861.46 | 1,720.93 | 860.97 | V | 361.22   | 181.11 | 344.19   | 172.60 | 343.21   | 172.11 | 3 |
| 16 | 1,825.97 | 913.49 | 1,808.95 | 904.98 | 1,807.96 | 904.48 | S | 262.15   | 131.58 | 245.12   | 123.07 | 244.14   | 122.57 | 2 |
| 17 |          |        |          |        |          |        | R | 175.12   | 88.06  | 158.09   | 79.55  |          |        | 1 |

Query 65678 Hit 1

MS/MS Fragmentation of **TVLGSINWAF LGVDEAHR**

Found in **sp|O14647|CHD2\_HUMAN**, Chromodomain-helicase-DNA-binding protein 2 OS=Homo sapiens GN=CHD2 PE=1 SV=2

Match to Query 65678: 2128.118from(710.3798,3+)

Title: 1020: Sum of 2 scans in range 2206 (rt=59.372, f=4, i=685) to 2207 (rt=59.3974, f=4, i=686)

[D:\lab212\membrane\Grace\Joyce\iTRAQ\_33\_2.raw]

Data File: Submitted from 20120508-1(merge) by Mascot Daemon on JOYCE-VAIO

Monoisotopic mass of neutral peptide Mr(calc): 2128.118

Variable modifications:

Ions Score: 58.89 Expect: 0.001

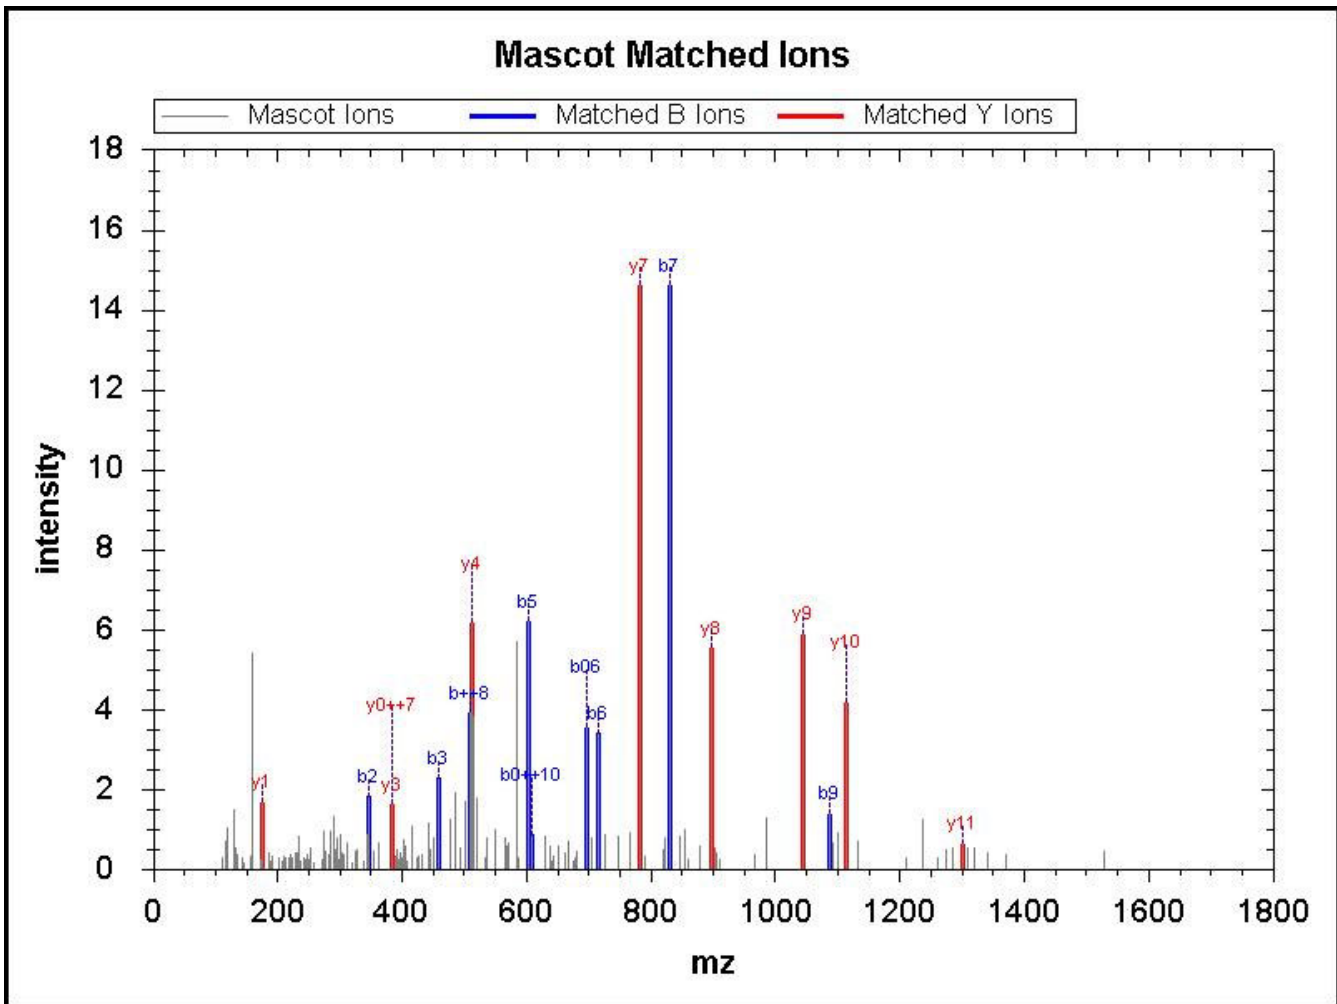

| No | b      | b++    | b* | b*++ | b0     | b0++   | Seq | y        | y++    | y*       | y*++   | y0       | y0++   | RevNo |
|----|--------|--------|----|------|--------|--------|-----|----------|--------|----------|--------|----------|--------|-------|
| 1  | 246.16 | 123.58 |    |      | 228.15 | 114.58 | T   |          |        |          |        |          |        | 18    |
| 2  | 345.23 | 173.12 |    |      | 327.21 | 164.11 | V   | 1,883.98 | 942.49 | 1,866.95 | 933.98 | 1,865.97 | 933.49 | 17    |
| 3  | 458.31 | 229.66 |    |      | 440.30 | 220.65 | L   | 1,784.91 | 892.96 | 1,767.88 | 884.44 | 1,766.90 | 883.95 | 16    |
| 4  | 515.33 | 258.17 |    |      | 497.32 | 249.16 | G   | 1,671.82 | 836.42 | 1,654.80 | 827.90 | 1,653.81 | 827.41 | 15    |

|    |          |        |          |        |          |        |   |          |        |          |        |          |        |    |
|----|----------|--------|----------|--------|----------|--------|---|----------|--------|----------|--------|----------|--------|----|
| 5  | 602.36   | 301.69 |          |        | 584.35   | 292.68 | S | 1,614.80 | 807.90 | 1,597.78 | 799.39 | 1,596.79 | 798.90 | 14 |
| 6  | 715.45   | 358.23 |          |        | 697.44   | 349.22 | I | 1,527.77 | 764.39 | 1,510.74 | 755.88 | 1,509.76 | 755.38 | 13 |
| 7  | 829.49   | 415.25 | 812.46   | 406.74 | 811.48   | 406.24 | N | 1,414.69 | 707.85 | 1,397.66 | 699.33 | 1,396.68 | 698.84 | 12 |
| 8  | 1,015.57 | 508.29 | 998.54   | 499.77 | 997.56   | 499.28 | W | 1,300.64 | 650.83 | 1,283.62 | 642.31 | 1,282.63 | 641.82 | 11 |
| 9  | 1,086.61 | 543.81 | 1,069.58 | 535.29 | 1,068.60 | 534.80 | A | 1,114.56 | 557.79 | 1,097.54 | 549.27 | 1,096.55 | 548.78 | 10 |
| 10 | 1,233.67 | 617.34 | 1,216.65 | 608.83 | 1,215.66 | 608.34 | F | 1,043.53 | 522.27 | 1,026.50 | 513.75 | 1,025.52 | 513.26 | 9  |
| 11 | 1,346.76 | 673.88 | 1,329.73 | 665.37 | 1,328.75 | 664.88 | L | 896.46   | 448.73 | 879.43   | 440.22 | 878.45   | 439.73 | 8  |
| 12 | 1,403.78 | 702.39 | 1,386.75 | 693.88 | 1,385.77 | 693.39 | G | 783.37   | 392.19 | 766.35   | 383.68 | 765.36   | 383.19 | 7  |
| 13 | 1,502.85 | 751.93 | 1,485.82 | 743.41 | 1,484.84 | 742.92 | V | 726.35   | 363.68 | 709.33   | 355.17 | 708.34   | 354.67 | 6  |
| 14 | 1,617.88 | 809.44 | 1,600.85 | 800.93 | 1,599.87 | 800.44 | D | 627.28   | 314.15 | 610.26   | 305.63 | 609.27   | 305.14 | 5  |
| 15 | 1,746.92 | 873.96 | 1,729.89 | 865.45 | 1,728.91 | 864.96 | E | 512.26   | 256.63 | 495.23   | 248.12 | 494.25   | 247.63 | 4  |
| 16 | 1,817.96 | 909.48 | 1,800.93 | 900.97 | 1,799.94 | 900.48 | A | 383.21   | 192.11 | 366.19   | 183.60 |          |        | 3  |
| 17 | 1,955.01 | 978.01 | 1,937.99 | 969.50 | 1,937.00 | 969.01 | H | 312.18   | 156.59 | 295.15   | 148.08 |          |        | 2  |
| 18 |          |        |          |        |          |        | R | 175.12   | 88.06  | 158.09   | 79.55  |          |        | 1  |

Query 58360 Hit 1

MS/MS Fragmentation of **EVPIPEHIDIYHLTR**

Found in **sp|Q9UG63|ABCF2\_HUMAN**, ATP-binding cassette sub-family F member 2 OS=Homo sapiens GN=ABCF2 PE=1 SV=2

Match to Query 58360: 1975.069from(494.7746,4+)

Title: 437: Scan 1590 (rt=43.2821, f=2, i=290) [D:\lab212\membrane\Grace\Joyce\iTRAQ\_46\_1.raw]

Data File: Submitted from 20120508-1(merge) by Mascot Daemon on JOYCE-VAIO

Monoisotopic mass of neutral peptide Mr(calc): 1975.069

Variable modifications:

Ions Score: 58.76 Expect: 0.001

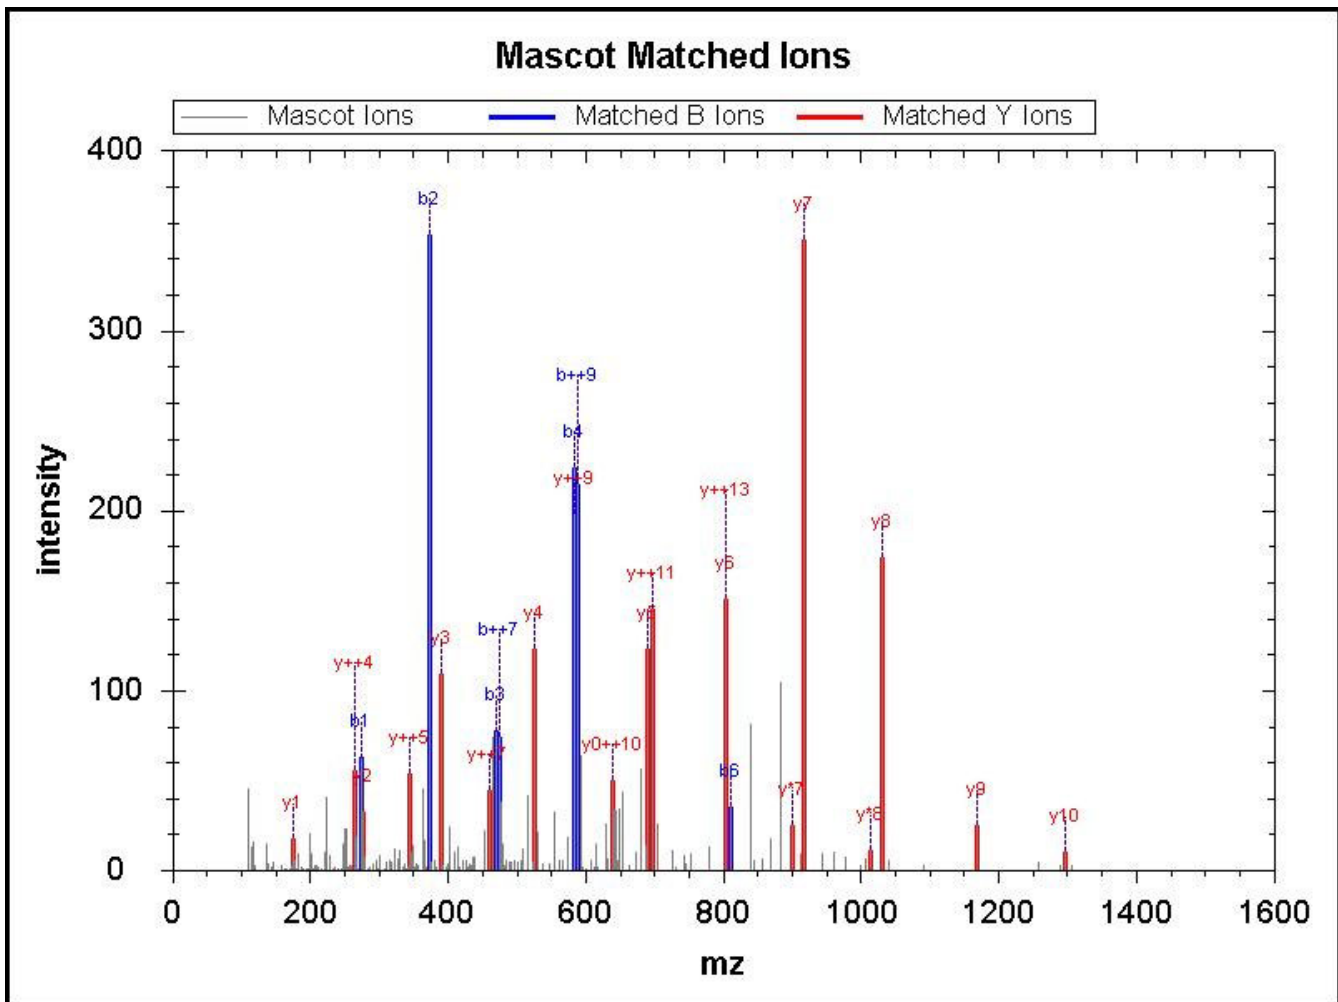

| No | b | b++ | b0 | b0++ | Seq | y | y++ | y* | y*++ | y0 | y0++ | RevNo |
|----|---|-----|----|------|-----|---|-----|----|------|----|------|-------|
|----|---|-----|----|------|-----|---|-----|----|------|----|------|-------|

|    |          |        |          |        |   |          |        |          |        |          |        |    |
|----|----------|--------|----------|--------|---|----------|--------|----------|--------|----------|--------|----|
| 1  | 274.15   | 137.58 | 256.14   | 128.57 | E |          |        |          |        |          |        | 15 |
| 2  | 373.22   | 187.11 | 355.21   | 178.11 | V | 1,702.93 | 851.97 | 1,685.90 | 843.45 | 1,684.92 | 842.96 | 14 |
| 3  | 470.27   | 235.64 | 452.26   | 226.63 | P | 1,603.86 | 802.43 | 1,586.83 | 793.92 | 1,585.85 | 793.43 | 13 |
| 4  | 583.36   | 292.18 | 565.35   | 283.18 | I | 1,506.81 | 753.91 | 1,489.78 | 745.39 | 1,488.80 | 744.90 | 12 |
| 5  | 680.41   | 340.71 | 662.40   | 331.70 | P | 1,393.72 | 697.36 | 1,376.70 | 688.85 | 1,375.71 | 688.36 | 11 |
| 6  | 809.45   | 405.23 | 791.44   | 396.22 | E | 1,296.67 | 648.84 | 1,279.64 | 640.33 | 1,278.66 | 639.83 | 10 |
| 7  | 946.51   | 473.76 | 928.50   | 464.75 | H | 1,167.63 | 584.32 | 1,150.60 | 575.80 | 1,149.62 | 575.31 | 9  |
| 8  | 1,059.60 | 530.30 | 1,041.58 | 521.30 | I | 1,030.57 | 515.79 | 1,013.54 | 507.27 | 1,012.56 | 506.78 | 8  |
| 9  | 1,174.62 | 587.81 | 1,156.61 | 578.81 | D | 917.48   | 459.25 | 900.46   | 450.73 | 899.47   | 450.24 | 7  |
| 10 | 1,287.71 | 644.36 | 1,269.70 | 635.35 | I | 802.46   | 401.73 | 785.43   | 393.22 | 784.45   | 392.73 | 6  |
| 11 | 1,450.77 | 725.89 | 1,432.76 | 716.88 | Y | 689.37   | 345.19 | 672.35   | 336.68 | 671.36   | 336.18 | 5  |
| 12 | 1,587.83 | 794.42 | 1,569.82 | 785.41 | H | 526.31   | 263.66 | 509.28   | 255.15 | 508.30   | 254.65 | 4  |
| 13 | 1,700.91 | 850.96 | 1,682.90 | 841.95 | L | 389.25   | 195.13 | 372.22   | 186.62 | 371.24   | 186.12 | 3  |
| 14 | 1,801.96 | 901.48 | 1,783.95 | 892.48 | T | 276.17   | 138.59 | 259.14   | 130.07 | 258.16   | 129.58 | 2  |
| 15 |          |        |          |        | R | 175.12   | 88.06  | 158.09   | 79.55  |          |        | 1  |

Query 64660 Hit 1

MS/MS Fragmentation of **AIIEEMLDLLEQSEGK**

Found in **sp|Q9NXJ5|PGPI\_HUMAN**, Pyroglutamyl-peptidase 1 OS=Homo sapiens GN=PGPEP1 PE=1 SV=1

Match to Query 64660: 2105.12 from (702.7139,3+)

Title: 1370: Sum of 2 scans in range 3008 (rt=77.2983, f=2, i=491) to 3009 (rt=77.3237, f=2, i=492)

[D:\lab212\membrane\GraceJoyce\iTRAQ\_27\_2\_327.raw]

Data File: Submitted from 20120508-1(merge) by Mascot Daemon on JOYCE-VAIO

Monoisotopic mass of neutral peptide Mr(calc): 2105.12

Variable modifications:

K16 :iTRAQ4plex (K)

Ions Score: 58.63 Expect: 0.001

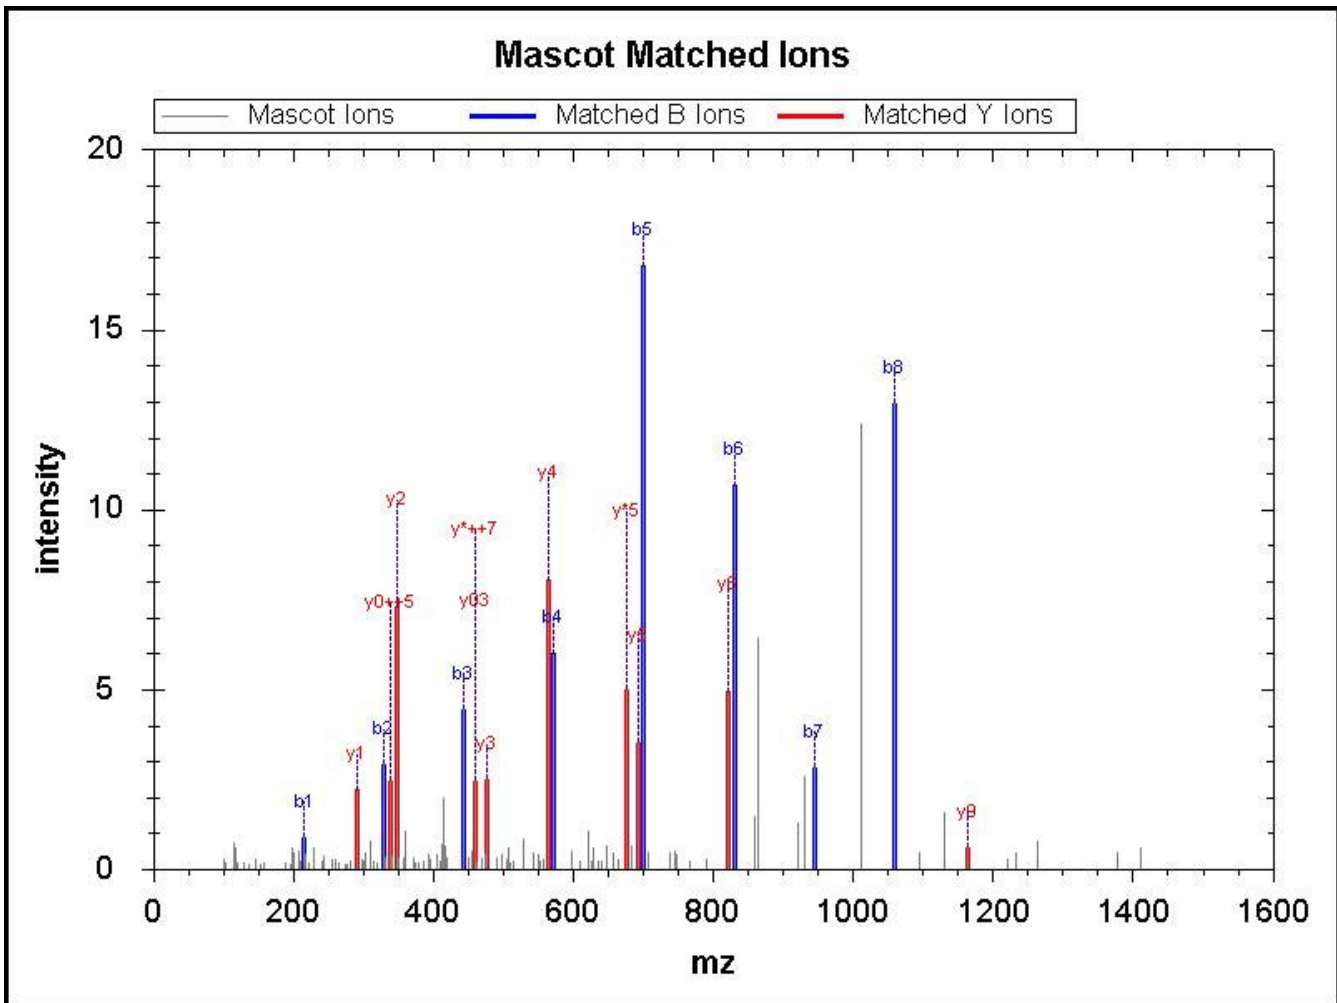

| No | b        | b++    | b*       | b*++   | b0       | b0++   | Seq | y        | y++    | y*       | y*++   | y0       | y0++   | RevNo |
|----|----------|--------|----------|--------|----------|--------|-----|----------|--------|----------|--------|----------|--------|-------|
| 1  | 216.15   | 108.58 |          |        |          |        | A   |          |        |          |        |          |        | 16    |
| 2  | 329.23   | 165.12 |          |        |          |        | I   | 1,890.99 | 946.00 | 1,873.96 | 937.48 | 1,872.97 | 936.99 | 15    |
| 3  | 442.31   | 221.66 |          |        |          |        | I   | 1,777.90 | 889.45 | 1,760.87 | 880.94 | 1,759.89 | 880.45 | 14    |
| 4  | 571.36   | 286.18 |          |        | 553.35   | 277.18 | E   | 1,664.82 | 832.91 | 1,647.79 | 824.40 | 1,646.81 | 823.91 | 13    |
| 5  | 700.40   | 350.70 |          |        | 682.39   | 341.70 | E   | 1,535.77 | 768.39 | 1,518.75 | 759.88 | 1,517.76 | 759.39 | 12    |
| 6  | 831.44   | 416.22 |          |        | 813.43   | 407.22 | M   | 1,406.73 | 703.87 | 1,389.71 | 695.36 | 1,388.72 | 694.86 | 11    |
| 7  | 944.52   | 472.77 |          |        | 926.51   | 463.76 | L   | 1,275.69 | 638.35 | 1,258.66 | 629.84 | 1,257.68 | 629.34 | 10    |
| 8  | 1,059.55 | 530.28 |          |        | 1,041.54 | 521.27 | D   | 1,162.61 | 581.81 | 1,145.58 | 573.29 | 1,144.60 | 572.80 | 9     |
| 9  | 1,172.64 | 586.82 |          |        | 1,154.62 | 577.82 | L   | 1,047.58 | 524.29 | 1,030.55 | 515.78 | 1,029.57 | 515.29 | 8     |
| 10 | 1,285.72 | 643.36 |          |        | 1,267.71 | 634.36 | L   | 934.50   | 467.75 | 917.47   | 459.24 | 916.49   | 458.75 | 7     |
| 11 | 1,414.76 | 707.88 |          |        | 1,396.75 | 698.88 | E   | 821.41   | 411.21 | 804.39   | 402.70 | 803.40   | 402.20 | 6     |
| 12 | 1,542.82 | 771.91 | 1,525.79 | 763.40 | 1,524.81 | 762.91 | Q   | 692.37   | 346.69 | 675.34   | 338.18 | 674.36   | 337.68 | 5     |
| 13 | 1,629.85 | 815.43 | 1,612.83 | 806.92 | 1,611.84 | 806.42 | S   | 564.31   | 282.66 | 547.28   | 274.15 | 546.30   | 273.65 | 4     |
| 14 | 1,758.90 | 879.95 | 1,741.87 | 871.44 | 1,740.88 | 870.95 | E   | 477.28   | 239.14 | 460.25   | 230.63 | 459.27   | 230.14 | 3     |
| 15 | 1,815.92 | 908.46 | 1,798.89 | 899.95 | 1,797.91 | 899.46 | G   | 348.24   | 174.62 | 331.21   | 166.11 |          |        | 2     |
| 16 |          |        |          |        |          |        | K   | 291.21   | 146.11 | 274.19   | 137.60 |          |        | 1     |

Query 32472 Hit 1

MS/MS Fragmentation of **ASVDELFAEIVR**

Found in **sp|P61225|RAP2B\_HUMAN**, Ras-related protein Rap-2b OS=Homo sapiens GN=RAP2B PE=1 SV=1

Match to Query 32472: 1491.806from(746.9101,2+)

Title: 942: Scan 2285 (rt=59.8691, f=3, i=322) [D:\lab212\membrane\Grace\Joyce\iTRAQ\_23\_2.raw]

Data File: Submitted from 20120508-1(merge) by Mascot Daemon on JOYCE-VAIO

Monoisotopic mass of neutral peptide Mr(calc): 1491.806

Variable modifications:

Ions Score: 58.58 Expect: 0.001

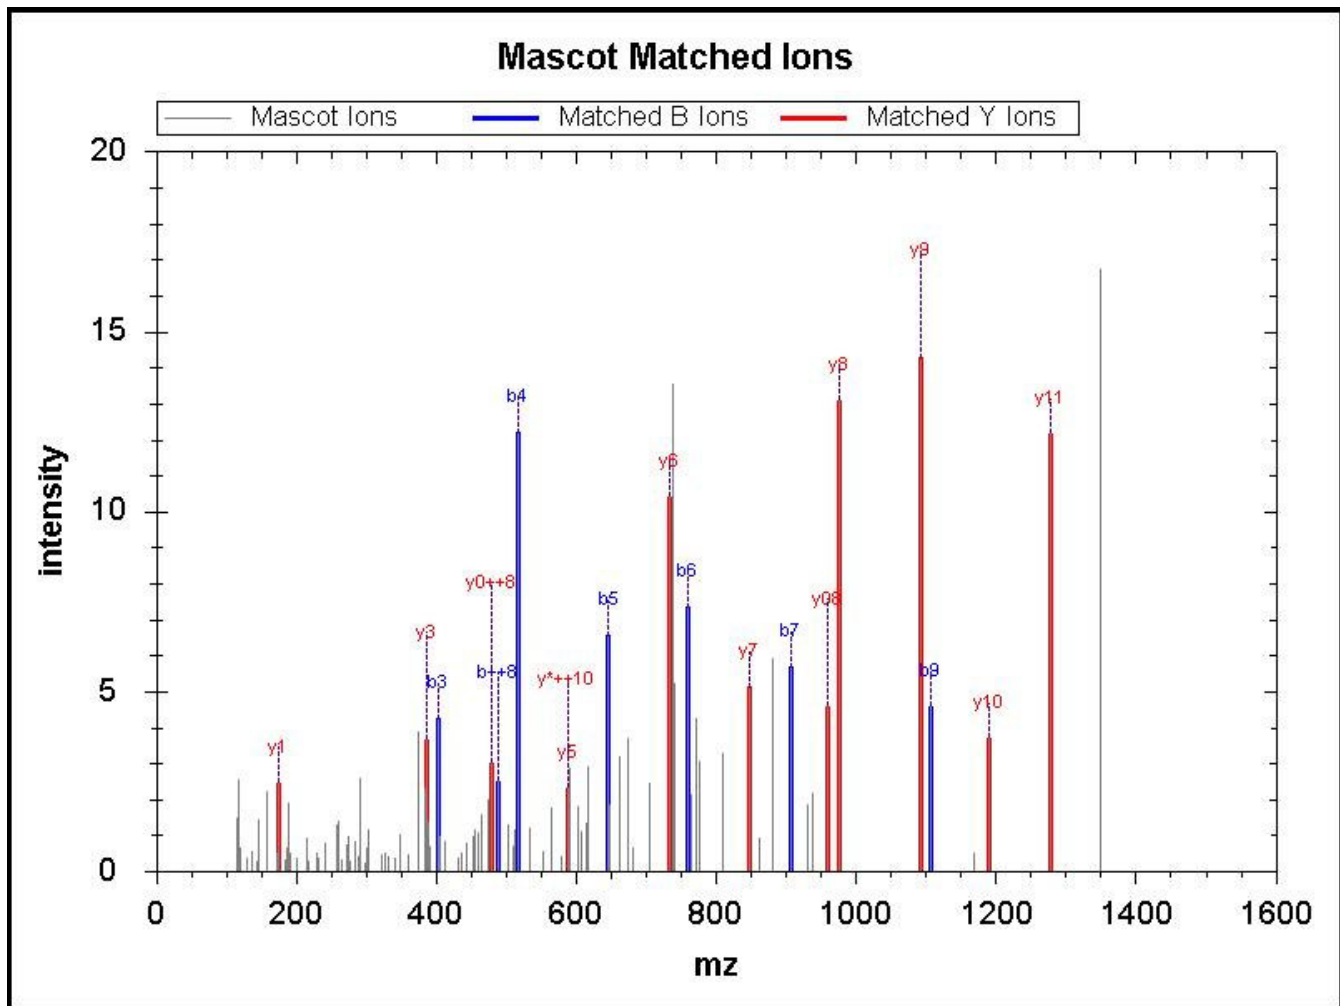

| No | b        | b++    | b0       | b0++   | Seq | y        | y++    | y*       | y*++   | y0       | y0++   | RevNo |
|----|----------|--------|----------|--------|-----|----------|--------|----------|--------|----------|--------|-------|
| 1  | 216.15   | 108.58 |          |        | A   |          |        |          |        |          |        | 12    |
| 2  | 303.18   | 152.09 | 285.17   | 143.09 | S   | 1,277.67 | 639.34 | 1,260.65 | 630.83 | 1,259.66 | 630.34 | 11    |
| 3  | 402.25   | 201.63 | 384.24   | 192.62 | V   | 1,190.64 | 595.82 | 1,173.61 | 587.31 | 1,172.63 | 586.82 | 10    |
| 4  | 517.27   | 259.14 | 499.26   | 250.14 | D   | 1,091.57 | 546.29 | 1,074.55 | 537.78 | 1,073.56 | 537.28 | 9     |
| 5  | 646.32   | 323.66 | 628.31   | 314.66 | E   | 976.55   | 488.78 | 959.52   | 480.26 | 958.54   | 479.77 | 8     |
| 6  | 759.40   | 380.20 | 741.39   | 371.20 | L   | 847.50   | 424.26 | 830.48   | 415.74 | 829.49   | 415.25 | 7     |
| 7  | 906.47   | 453.74 | 888.46   | 444.73 | F   | 734.42   | 367.71 | 717.39   | 359.20 | 716.41   | 358.71 | 6     |
| 8  | 977.51   | 489.26 | 959.50   | 480.25 | A   | 587.35   | 294.18 | 570.32   | 285.67 | 569.34   | 285.17 | 5     |
| 9  | 1,106.55 | 553.78 | 1,088.54 | 544.77 | E   | 516.31   | 258.66 | 499.29   | 250.15 | 498.30   | 249.66 | 4     |
| 10 | 1,219.63 | 610.32 | 1,201.62 | 601.31 | I   | 387.27   | 194.14 | 370.24   | 185.63 |          |        | 3     |
| 11 | 1,318.70 | 659.85 | 1,300.69 | 650.85 | V   | 274.19   | 137.60 | 257.16   | 129.08 |          |        | 2     |
| 12 |          |        |          |        | R   | 175.12   | 88.06  | 158.09   | 79.55  |          |        | 1     |

Query 63637 Hit 1

MS/MS Fragmentation of **EFWEIVHSFTDEQK**

Found in **sp|Q05086|UBE3A\_HUMAN**, Ubiquitin-protein ligase E3A OS=Homo sapiens GN=UBE3A PE=1 SV=4

Match to Query 63637: 2082.012from(695.0114,3+)

Title: 984: Scan 2122 (rt=57.5546, f=2, i=342) [D:\lab212\membrane\Grace\Joyce\iTRAQ40.raw]

Data File: Submitted from 20120508-1(merge) by Mascot Daemon on JOYCE-VAIO

Monoisotopic mass of neutral peptide Mr(calc): 2082.012

Variable modifications:

K14 iTRAQ4plex (K)

Ions Score: 58.56 Expect: 0.001

### Mascot Matched Ions

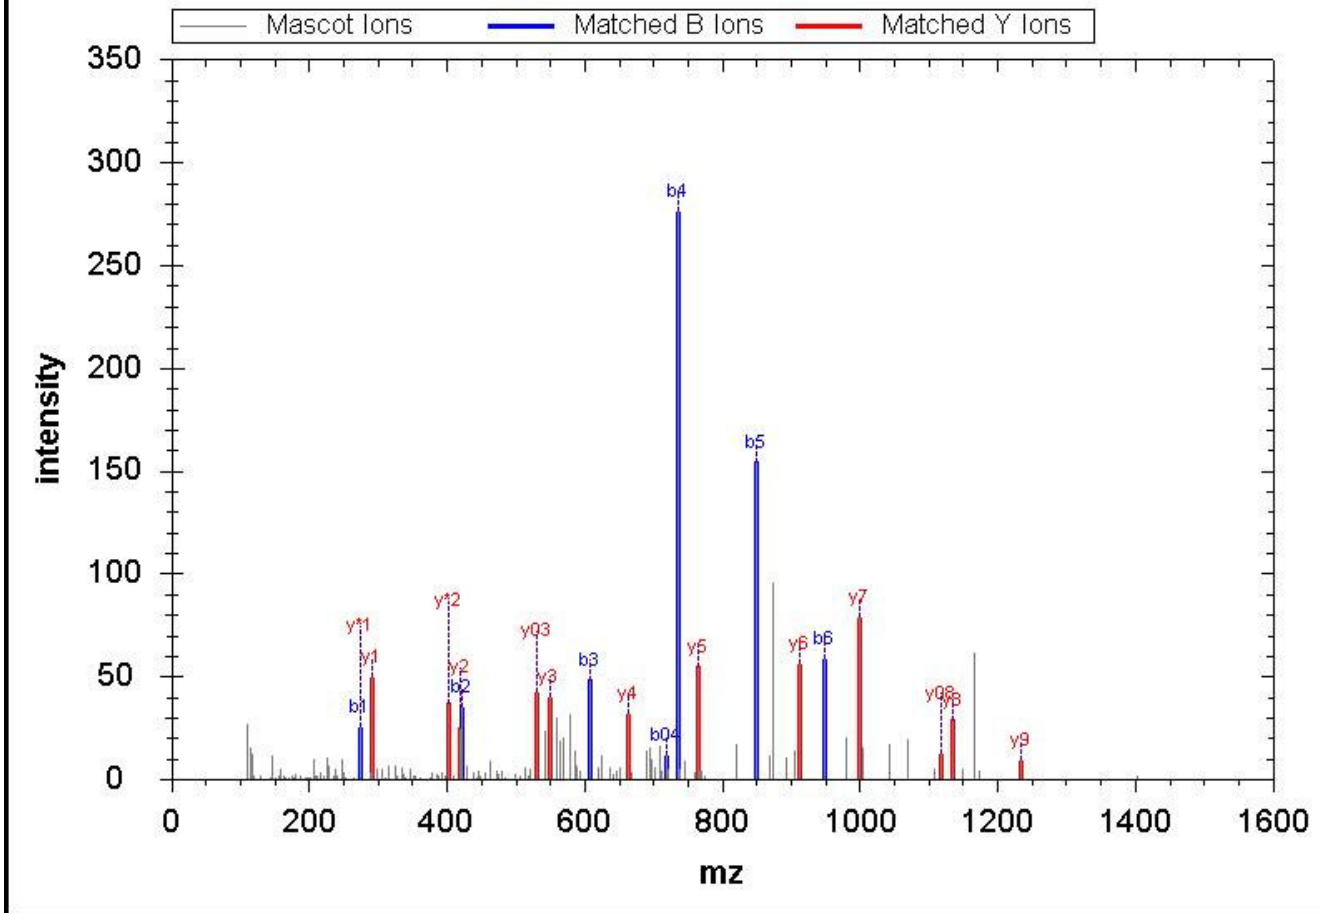

| No | b        | b++    | b*       | b*++   | b0       | b0++   | Seq | y        | y++    | y*       | y*++   | y0       | y0++   | RevNo |
|----|----------|--------|----------|--------|----------|--------|-----|----------|--------|----------|--------|----------|--------|-------|
| 1  | 274.15   | 137.58 |          |        | 256.14   | 128.57 | E   |          |        |          |        |          |        | 14    |
| 2  | 421.22   | 211.11 |          |        | 403.21   | 202.11 | F   | 1,809.89 | 905.45 | 1,792.87 | 896.94 | 1,791.88 | 896.44 | 13    |
| 3  | 607.30   | 304.15 |          |        | 589.29   | 295.15 | W   | 1,662.82 | 831.92 | 1,645.80 | 823.40 | 1,644.81 | 822.91 | 12    |
| 4  | 736.34   | 368.67 |          |        | 718.33   | 359.67 | E   | 1,476.75 | 738.88 | 1,459.72 | 730.36 | 1,458.73 | 729.87 | 11    |
| 5  | 849.43   | 425.22 |          |        | 831.42   | 416.21 | I   | 1,347.70 | 674.35 | 1,330.68 | 665.84 | 1,329.69 | 665.35 | 10    |
| 6  | 948.49   | 474.75 |          |        | 930.48   | 465.75 | V   | 1,234.62 | 617.81 | 1,217.59 | 609.30 | 1,216.61 | 608.81 | 9     |
| 7  | 1,085.55 | 543.28 |          |        | 1,067.54 | 534.28 | H   | 1,135.55 | 568.28 | 1,118.52 | 559.77 | 1,117.54 | 559.27 | 8     |
| 8  | 1,172.59 | 586.80 |          |        | 1,154.58 | 577.79 | S   | 998.49   | 499.75 | 981.46   | 491.24 | 980.48   | 490.74 | 7     |
| 9  | 1,319.65 | 660.33 |          |        | 1,301.64 | 651.33 | F   | 911.46   | 456.23 | 894.43   | 447.72 | 893.45   | 447.23 | 6     |
| 10 | 1,420.70 | 710.85 |          |        | 1,402.69 | 701.85 | T   | 764.39   | 382.70 | 747.36   | 374.19 | 746.38   | 373.69 | 5     |
| 11 | 1,535.73 | 768.37 |          |        | 1,517.72 | 759.36 | D   | 663.34   | 332.18 | 646.32   | 323.66 | 645.33   | 323.17 | 4     |
| 12 | 1,664.77 | 832.89 |          |        | 1,646.76 | 823.88 | E   | 548.32   | 274.66 | 531.29   | 266.15 | 530.31   | 265.66 | 3     |
| 13 | 1,792.83 | 896.92 | 1,775.80 | 888.41 | 1,774.82 | 887.91 | Q   | 419.27   | 210.14 | 402.25   | 201.63 |          |        | 2     |
| 14 |          |        |          |        |          |        | K   | 291.21   | 146.11 | 274.19   | 137.60 |          |        | 1     |

Query 69312 Hit 1

MS/MS Fragmentation of **KPIDYTLDDIGHGVK**

Found in **sp|Q9NYB9|ABI2\_HUMAN**, Abl interactor 2 OS=Homo sapiens GN=ABI2 PE=1 SV=1

Match to Query 69312: 2215.264from(554.8232,4+)

Title: 702: Scan 1532 (rt=44.1989, f=2, i=245) [D:\lab212\membrane\Grace\Joyce\iTRAQ\_50\_2.raw]

Data File: Submitted from 20120508-1(merge) by Mascot Daemon on JOYCE-VAIO

Monoisotopic mass of neutral peptide Mr(calc): 2215.264

Variable modifications:

K1 iTRAQ4plex (K)

K16 iTRAQ4plex (K)

Ions Score: 58.56 Expect: 0.001

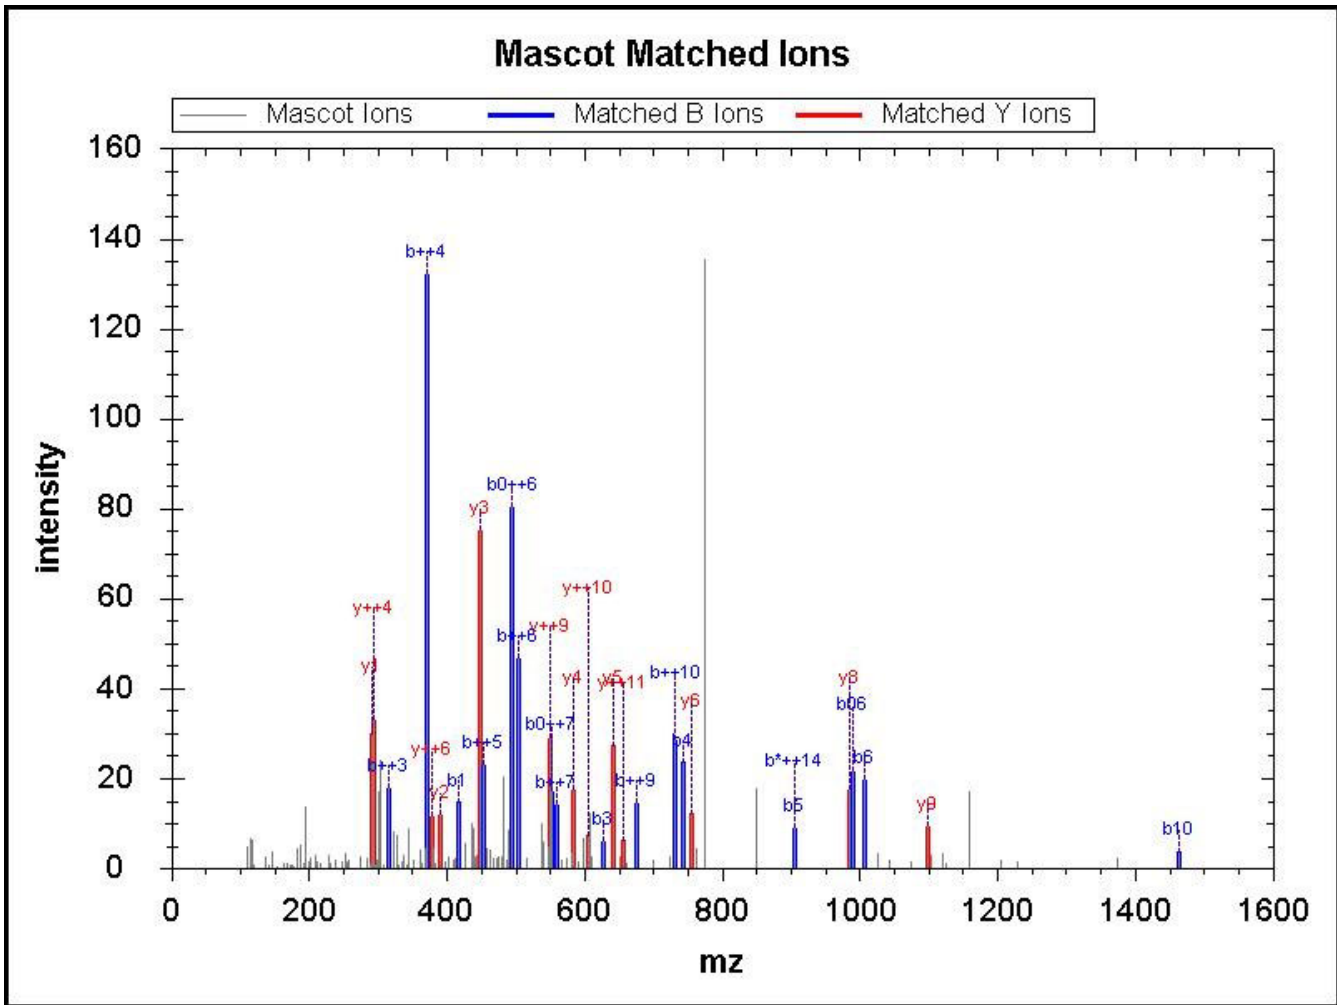

| No | b        | b++    | b*       | b*++   | b0       | b0++   | Seq | y        | y++    | y*       | y*++   | y0       | y0++   | RevNo |
|----|----------|--------|----------|--------|----------|--------|-----|----------|--------|----------|--------|----------|--------|-------|
| 1  | 417.31   | 209.16 | 400.28   | 200.64 |          |        | K   |          |        |          |        |          |        | 16    |
| 2  | 514.36   | 257.68 | 497.33   | 249.17 |          |        | P   | 1,799.97 | 900.49 | 1,782.94 | 891.97 | 1,781.96 | 891.48 | 15    |
| 3  | 627.44   | 314.23 | 610.42   | 305.71 |          |        | I   | 1,702.91 | 851.96 | 1,685.89 | 843.45 | 1,684.90 | 842.96 | 14    |
| 4  | 742.47   | 371.74 | 725.44   | 363.23 | 724.46   | 362.73 | D   | 1,589.83 | 795.42 | 1,572.80 | 786.91 | 1,571.82 | 786.41 | 13    |
| 5  | 905.53   | 453.27 | 888.51   | 444.76 | 887.52   | 444.27 | Y   | 1,474.80 | 737.90 | 1,457.78 | 729.39 | 1,456.79 | 728.90 | 12    |
| 6  | 1,006.58 | 503.79 | 989.55   | 495.28 | 988.57   | 494.79 | T   | 1,311.74 | 656.37 | 1,294.71 | 647.86 | 1,293.73 | 647.37 | 11    |
| 7  | 1,119.67 | 560.34 | 1,102.64 | 551.82 | 1,101.65 | 551.33 | I   | 1,210.69 | 605.85 | 1,193.66 | 597.34 | 1,192.68 | 596.84 | 10    |
| 8  | 1,232.75 | 616.88 | 1,215.72 | 608.37 | 1,214.74 | 607.87 | L   | 1,097.61 | 549.31 | 1,080.58 | 540.79 | 1,079.60 | 540.30 | 9     |
| 9  | 1,347.78 | 674.39 | 1,330.75 | 665.88 | 1,329.77 | 665.39 | D   | 984.52   | 492.77 | 967.50   | 484.25 | 966.51   | 483.76 | 8     |
| 10 | 1,462.80 | 731.91 | 1,445.78 | 723.39 | 1,444.79 | 722.90 | D   | 869.50   | 435.25 | 852.47   | 426.74 | 851.49   | 426.25 | 7     |
| 11 | 1,575.89 | 788.45 | 1,558.86 | 779.93 | 1,557.88 | 779.44 | I   | 754.47   | 377.74 | 737.44   | 369.22 |          |        | 6     |
| 12 | 1,632.91 | 816.96 | 1,615.88 | 808.44 | 1,614.90 | 807.95 | G   | 641.39   | 321.20 | 624.36   | 312.68 |          |        | 5     |
| 13 | 1,769.97 | 885.49 | 1,752.94 | 876.97 | 1,751.96 | 876.48 | H   | 584.36   | 292.69 | 567.34   | 284.17 |          |        | 4     |
| 14 | 1,826.99 | 914.00 | 1,809.96 | 905.49 | 1,808.98 | 904.99 | G   | 447.30   | 224.16 | 430.28   | 215.64 |          |        | 3     |
| 15 | 1,926.06 | 963.53 | 1,909.03 | 955.02 | 1,908.05 | 954.53 | V   | 390.28   | 195.65 | 373.26   | 187.13 |          |        | 2     |
| 16 |          |        |          |        |          |        | K   | 291.21   | 146.11 | 274.19   | 137.60 |          |        | 1     |

Query 70180 Hit 1

MS/MS Fragmentation of **HYLLSQGWDEEQEK**

Found in **sp|P12694|ODBA\_HUMAN**, 2-oxoisovalerate dehydrogenase subunit alpha

Match to Query 70180: 2235.086from(746.036,3+)

Title: 711: Scan 1601 (rt=45.6575, f=3, i=247) [D:\lab212\membrane\Grace\Joyce\iTRAQ\_44\_1.raw]

Data File: Submitted from 20120508-1(merge) by Mascot Daemon on JOYCE-VAIO

Monoisotopic mass of neutral peptide Mr(calc): 2235.086

Variable modifications:  
 K15 iTRAQ4plex (K)  
 Ions Score: 58.47 Expect: 0.001

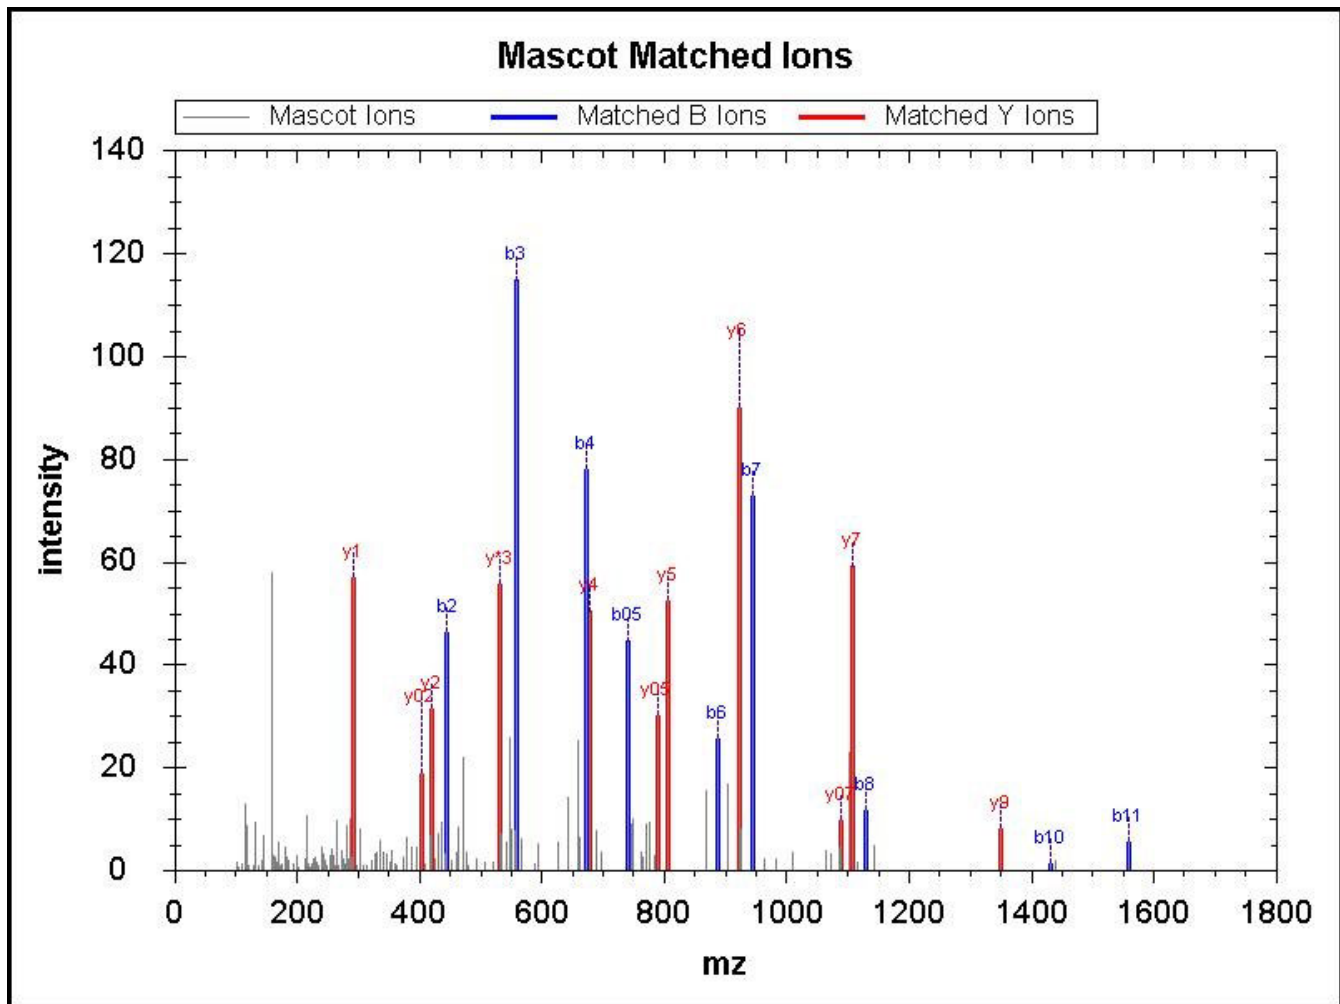

| No | b        | b++    | b*       | b*++   | b0       | b0++   | Seq | y        | y++    | y*       | y*++   | y0       | y0++   | RevNo |
|----|----------|--------|----------|--------|----------|--------|-----|----------|--------|----------|--------|----------|--------|-------|
| 1  | 282.17   | 141.59 |          |        |          |        | H   |          |        |          |        |          |        | 15    |
| 2  | 445.23   | 223.12 |          |        |          |        | Y   | 1,954.93 | 977.97 | 1,937.90 | 969.46 | 1,936.92 | 968.96 | 14    |
| 3  | 558.32   | 279.66 |          |        |          |        | L   | 1,791.87 | 896.44 | 1,774.84 | 887.92 | 1,773.86 | 887.43 | 13    |
| 4  | 671.40   | 336.20 |          |        |          |        | L   | 1,678.78 | 839.90 | 1,661.76 | 831.38 | 1,660.77 | 830.89 | 12    |
| 5  | 758.43   | 379.72 |          |        | 740.42   | 370.71 | S   | 1,565.70 | 783.35 | 1,548.67 | 774.84 | 1,547.69 | 774.35 | 11    |
| 6  | 886.49   | 443.75 | 869.46   | 435.24 | 868.48   | 434.74 | Q   | 1,478.67 | 739.84 | 1,461.64 | 731.32 | 1,460.66 | 730.83 | 10    |
| 7  | 943.51   | 472.26 | 926.49   | 463.75 | 925.50   | 463.25 | G   | 1,350.61 | 675.81 | 1,333.58 | 667.29 | 1,332.60 | 666.80 | 9     |
| 8  | 1,129.59 | 565.30 | 1,112.56 | 556.79 | 1,111.58 | 556.29 | W   | 1,293.59 | 647.30 | 1,276.56 | 638.78 | 1,275.58 | 638.29 | 8     |
| 9  | 1,315.67 | 658.34 | 1,298.64 | 649.83 | 1,297.66 | 649.33 | W   | 1,107.51 | 554.26 | 1,090.48 | 545.74 | 1,089.50 | 545.25 | 7     |
| 10 | 1,430.70 | 715.85 | 1,413.67 | 707.34 | 1,412.69 | 706.85 | D   | 921.43   | 461.22 | 904.40   | 452.70 | 903.42   | 452.21 | 6     |
| 11 | 1,559.74 | 780.37 | 1,542.71 | 771.86 | 1,541.73 | 771.37 | E   | 806.40   | 403.70 | 789.37   | 395.19 | 788.39   | 394.70 | 5     |
| 12 | 1,688.78 | 844.90 | 1,671.76 | 836.38 | 1,670.77 | 835.89 | E   | 677.36   | 339.18 | 660.33   | 330.67 | 659.35   | 330.18 | 4     |
| 13 | 1,816.84 | 908.92 | 1,799.81 | 900.41 | 1,798.83 | 899.92 | Q   | 548.32   | 274.66 | 531.29   | 266.15 | 530.31   | 265.66 | 3     |
| 14 | 1,945.88 | 973.45 | 1,928.86 | 964.93 | 1,927.87 | 964.44 | E   | 420.26   | 210.63 | 403.23   | 202.12 | 402.25   | 201.63 | 2     |
| 15 |          |        |          |        |          |        | K   | 291.21   | 146.11 | 274.19   | 137.60 |          |        | 1     |

Query 77146 Hit 1

MS/MS Fragmentation of **HQLGGPMWAEPIDLDLVGR**

Found in **sp|Q9NXH9|TRM1\_HUMAN**, tRNA (guanine(26)-N(2))-dimethyltransferase OS=Homo sapiens GN=TRMT1 PE=1 SV=1  
 Match to Query 77146: 2418.207from(605.5591,4+)

Title: 599: Sum of 2 scans in range 1926 (rt=50.8615, f=4, i=367) to 1927 (rt=50.8869, f=4, i=368)





Query 21672 Hit 1

MS/MS Fragmentation of **QVAQASHSYR**

Found in **sp|O43819|SCO2\_HUMAN**, Protein SCO2 homolog

Match to Query 21672: 1289.66from(430.8941,3+)

Title: 48: Scan 160 (rt=13.3691, f=3, i=20) [D:\lab212\membrane\GraceJoyce\iTRAQ\_42\_2.raw]

Data File: Submitted from 20120508-1(merge) by Mascot Daemon on JOYCE-VAIO

Monoisotopic mass of neutral peptide Mr(calc): 1289.66

Variable modifications:

Ions Score: 58.24 Expect: 0.001

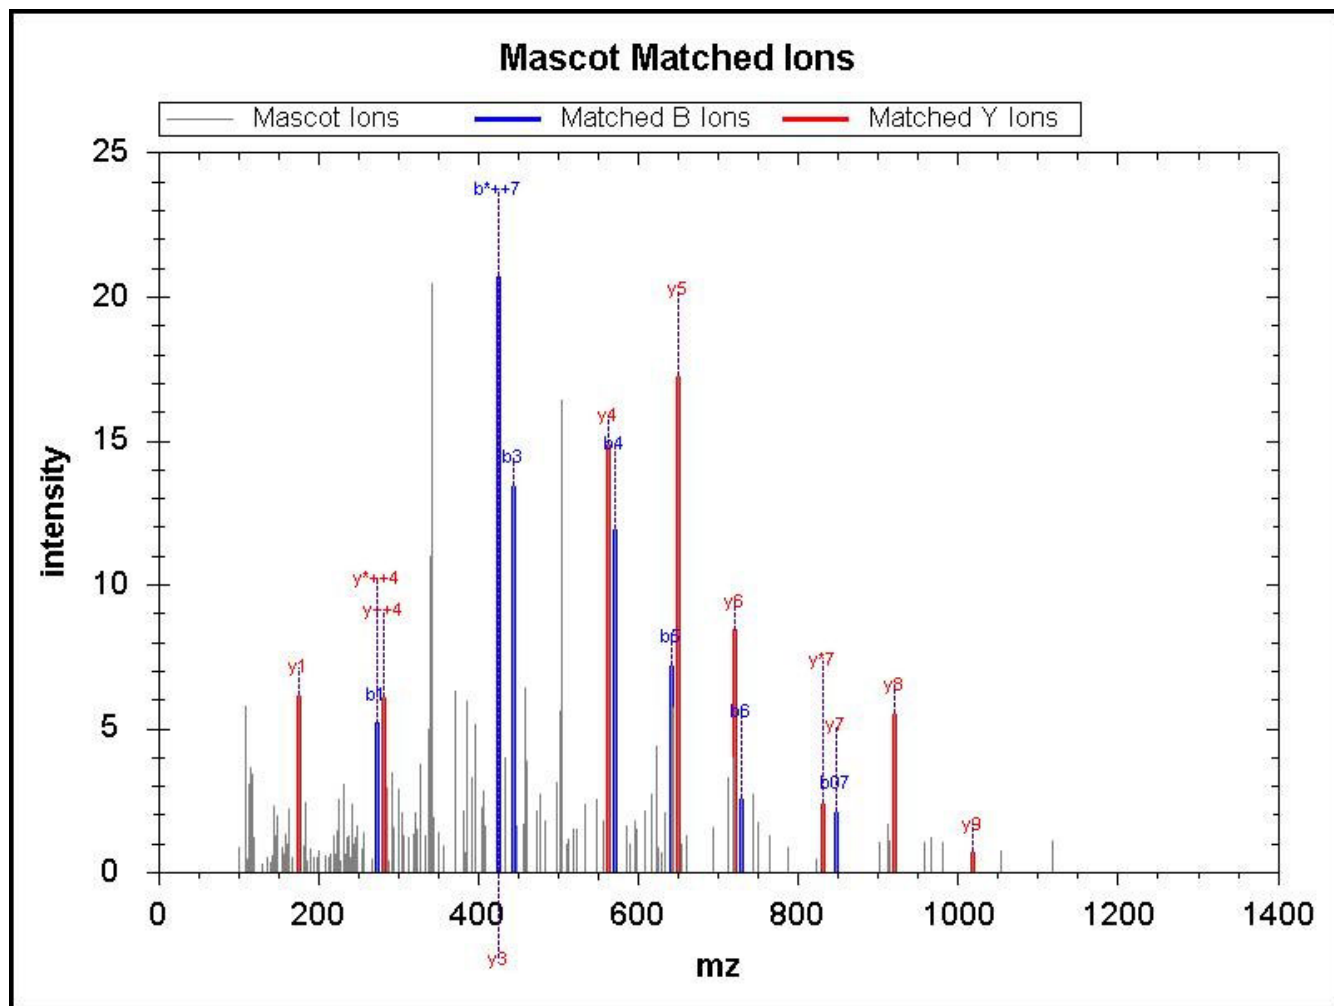

| No | b        | b++    | b*       | b*++   | b0       | b0++   | Seq | y        | y++    | y*       | y*++   | y0       | y0++   | RevNo |
|----|----------|--------|----------|--------|----------|--------|-----|----------|--------|----------|--------|----------|--------|-------|
| 1  | 273.17   | 137.09 | 256.14   | 128.57 |          |        | Q   |          |        |          |        |          |        | 10    |
| 2  | 372.24   | 186.62 | 355.21   | 178.11 |          |        | V   | 1,018.51 | 509.76 | 1,001.48 | 501.24 | 1,000.50 | 500.75 | 9     |
| 3  | 443.27   | 222.14 | 426.25   | 213.63 |          |        | A   | 919.44   | 460.22 | 902.41   | 451.71 | 901.43   | 451.22 | 8     |
| 4  | 571.33   | 286.17 | 554.31   | 277.66 |          |        | Q   | 848.40   | 424.70 | 831.37   | 416.19 | 830.39   | 415.70 | 7     |
| 5  | 642.37   | 321.69 | 625.34   | 313.17 |          |        | A   | 720.34   | 360.67 | 703.32   | 352.16 | 702.33   | 351.67 | 6     |
| 6  | 729.40   | 365.20 | 712.37   | 356.69 | 711.39   | 356.20 | S   | 649.31   | 325.16 | 632.28   | 316.64 | 631.29   | 316.15 | 5     |
| 7  | 866.46   | 433.73 | 849.43   | 425.22 | 848.45   | 424.73 | H   | 562.27   | 281.64 | 545.25   | 273.13 | 544.26   | 272.63 | 4     |
| 8  | 953.49   | 477.25 | 936.47   | 468.74 | 935.48   | 468.24 | S   | 425.21   | 213.11 | 408.19   | 204.60 | 407.20   | 204.11 | 3     |
| 9  | 1,116.56 | 558.78 | 1,099.53 | 550.27 | 1,098.54 | 549.78 | Y   | 338.18   | 169.59 | 321.16   | 161.08 |          |        | 2     |
| 10 |          |        |          |        |          |        | R   | 175.12   | 88.06  | 158.09   | 79.55  |          |        | 1     |

Query 71888 Hit 1

MS/MS Fragmentation of **ILEAHQNVAQLSLTEAQLR**

Found in **sp|Q8K1B8|URP2\_MOUSE**, Fermitin family homolog 3 OS=Mus musculus GN=Fermt3 PE=1 SV=1

Match to Query 71888: 2277.256from(760.0926,3+)

Title: 617: Scan 1423 (rt=41.43, f=2, i=219) [D:\lab212\membrane\Grace\Joyce\iTRAQ\_33\_1.raw]

Data File: Submitted from 20120508-1(merge) by Mascot Daemon on JOYCE-VAIO

Monoisotopic mass of neutral peptide Mr(calc): 2277.256

Variable modifications:

Ions Score: 58.12 Expect: 0.001

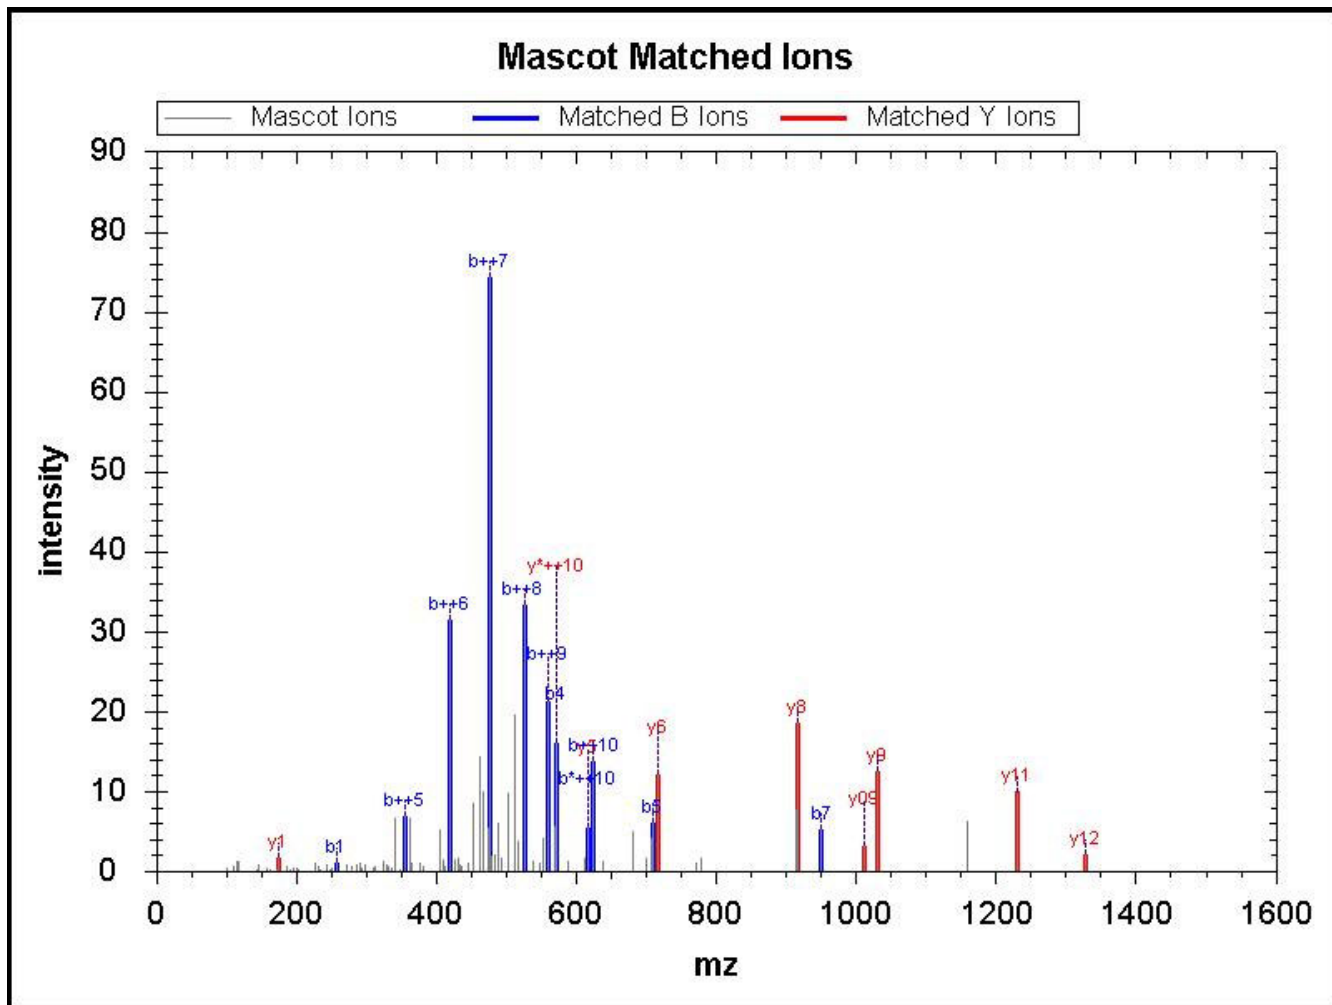

| No | b        | b++      | b*       | b*++     | b0       | b0++     | Seq | y        | y++      | y*       | y*++     | y0       | y0++     | RevNo |
|----|----------|----------|----------|----------|----------|----------|-----|----------|----------|----------|----------|----------|----------|-------|
| 1  | 258.19   | 129.60   |          |          |          |          | I   |          |          |          |          |          |          | 19    |
| 2  | 371.28   | 186.14   |          |          |          |          | L   | 2,021.08 | 1,011.04 | 2,004.05 | 1,002.53 | 2,003.07 | 1,002.04 | 18    |
| 3  | 500.32   | 250.66   |          |          | 482.31   | 241.66   | E   | 1,907.99 | 954.50   | 1,890.97 | 945.99   | 1,889.98 | 945.50   | 17    |
| 4  | 571.36   | 286.18   |          |          | 553.35   | 277.18   | A   | 1,778.95 | 889.98   | 1,761.92 | 881.47   | 1,760.94 | 880.97   | 16    |
| 5  | 708.42   | 354.71   |          |          | 690.41   | 345.71   | H   | 1,707.91 | 854.46   | 1,690.89 | 845.95   | 1,689.90 | 845.46   | 15    |
| 6  | 836.47   | 418.74   | 819.45   | 410.23   | 818.46   | 409.74   | Q   | 1,570.85 | 785.93   | 1,553.83 | 777.42   | 1,552.84 | 776.93   | 14    |
| 7  | 950.52   | 475.76   | 933.49   | 467.25   | 932.51   | 466.76   | N   | 1,442.80 | 721.90   | 1,425.77 | 713.39   | 1,424.79 | 712.90   | 13    |
| 8  | 1,049.59 | 525.30   | 1,032.56 | 516.78   | 1,031.58 | 516.29   | V   | 1,328.75 | 664.88   | 1,311.73 | 656.37   | 1,310.74 | 655.87   | 12    |
| 9  | 1,120.62 | 560.82   | 1,103.60 | 552.30   | 1,102.61 | 551.81   | A   | 1,229.68 | 615.35   | 1,212.66 | 606.83   | 1,211.67 | 606.34   | 11    |
| 10 | 1,248.68 | 624.84   | 1,231.66 | 616.33   | 1,230.67 | 615.84   | Q   | 1,158.65 | 579.83   | 1,141.62 | 571.31   | 1,140.64 | 570.82   | 10    |
| 11 | 1,361.77 | 681.39   | 1,344.74 | 672.87   | 1,343.76 | 672.38   | L   | 1,030.59 | 515.80   | 1,013.56 | 507.28   | 1,012.58 | 506.79   | 9     |
| 12 | 1,448.80 | 724.90   | 1,431.77 | 716.39   | 1,430.79 | 715.90   | S   | 917.51   | 459.26   | 900.48   | 450.74   | 899.49   | 450.25   | 8     |
| 13 | 1,561.88 | 781.44   | 1,544.86 | 772.93   | 1,543.87 | 772.44   | L   | 830.47   | 415.74   | 813.45   | 407.23   | 812.46   | 406.73   | 7     |
| 14 | 1,662.93 | 831.97   | 1,645.90 | 823.46   | 1,644.92 | 822.96   | T   | 717.39   | 359.20   | 700.36   | 350.68   | 699.38   | 350.19   | 6     |
| 15 | 1,791.97 | 896.49   | 1,774.95 | 887.98   | 1,773.96 | 887.48   | E   | 616.34   | 308.67   | 599.31   | 300.16   | 598.33   | 299.67   | 5     |
| 16 | 1,863.01 | 932.01   | 1,845.98 | 923.50   | 1,845.00 | 923.00   | A   | 487.30   | 244.15   | 470.27   | 235.64   |          |          | 4     |
| 17 | 1,991.07 | 996.04   | 1,974.04 | 987.52   | 1,973.06 | 987.03   | Q   | 416.26   | 208.63   | 399.24   | 200.12   |          |          | 3     |
| 18 | 2,104.15 | 1,052.58 | 2,087.13 | 1,044.07 | 2,086.14 | 1,043.57 | L   | 288.20   | 144.61   | 271.18   | 136.09   |          |          | 2     |

Query 76034 Hit 1

MS/MS Fragmentation of **L**SLVDVSQVSVVHTL**Q**TDFR

Found in **sp|Q8WW59|SPRY4\_HUMAN**, SPRY domain-containing protein 4 OS=Homo sapiens GN=SPRYD4 PE=1 SV=2

Match to Query 76034: 2386.287from(796.4363,3+)

Title: 958: Scan 2128 (rt=57.3078, f=3, i=327) [D:\lab212\membrane\Grace\Joyce\TRAQ\_31\_1.raw]

Data File: Submitted from 20120508-1(merge) by Mascot Daemon on JOYCE-VAIO

Monoisotopic mass of neutral peptide Mr(calc): 2386.287

Variable modifications:

Ions Score: 58.03 Expect: 0.001

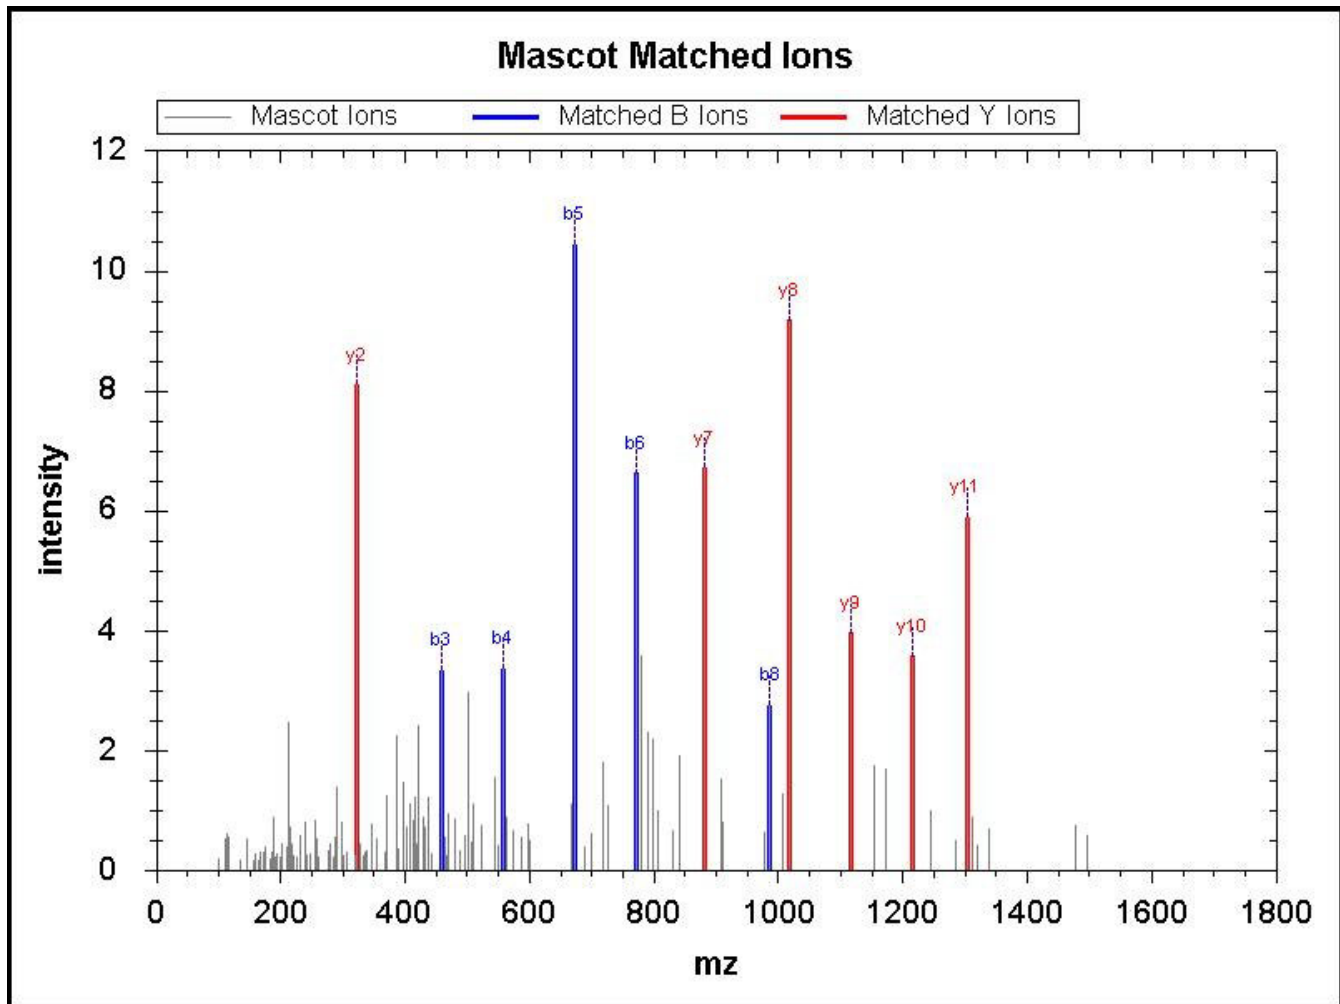

| No | b        | b++    | b*       | b*++   | b0       | b0++   | Seq | y        | y++      | y*       | y*++     | y0       | y0++     | RevNo |
|----|----------|--------|----------|--------|----------|--------|-----|----------|----------|----------|----------|----------|----------|-------|
| 1  | 258.19   | 129.60 |          |        |          |        | L   |          |          |          |          |          |          | 20    |
| 2  | 345.23   | 173.12 |          |        | 327.21   | 164.11 | S   | 2,130.12 | 1,065.56 | 2,113.09 | 1,057.05 | 2,112.11 | 1,056.56 | 19    |
| 3  | 458.31   | 229.66 |          |        | 440.30   | 220.65 | L   | 2,043.09 | 1,022.05 | 2,026.06 | 1,013.53 | 2,025.08 | 1,013.04 | 18    |
| 4  | 557.38   | 279.19 |          |        | 539.37   | 270.19 | V   | 1,930.00 | 965.50   | 1,912.98 | 956.99   | 1,911.99 | 956.50   | 17    |
| 5  | 672.40   | 336.71 |          |        | 654.39   | 327.70 | D   | 1,830.93 | 915.97   | 1,813.91 | 907.46   | 1,812.92 | 906.97   | 16    |
| 6  | 771.47   | 386.24 |          |        | 753.46   | 377.23 | V   | 1,715.91 | 858.46   | 1,698.88 | 849.94   | 1,697.90 | 849.45   | 15    |
| 7  | 858.51   | 429.76 |          |        | 840.49   | 420.75 | S   | 1,616.84 | 808.92   | 1,599.81 | 800.41   | 1,598.83 | 799.92   | 14    |
| 8  | 986.56   | 493.79 | 969.54   | 485.27 | 968.55   | 484.78 | Q   | 1,529.81 | 765.41   | 1,512.78 | 756.89   | 1,511.80 | 756.40   | 13    |
| 9  | 1,085.63 | 543.32 | 1,068.61 | 534.81 | 1,067.62 | 534.31 | V   | 1,401.75 | 701.38   | 1,384.72 | 692.86   | 1,383.74 | 692.37   | 12    |
| 10 | 1,172.66 | 586.84 | 1,155.64 | 578.32 | 1,154.65 | 577.83 | S   | 1,302.68 | 651.84   | 1,285.65 | 643.33   | 1,284.67 | 642.84   | 11    |
| 11 | 1,271.73 | 636.37 | 1,254.71 | 627.86 | 1,253.72 | 627.36 | V   | 1,215.65 | 608.33   | 1,198.62 | 599.81   | 1,197.64 | 599.32   | 10    |
| 12 | 1,370.80 | 685.90 | 1,353.77 | 677.39 | 1,352.79 | 676.90 | V   | 1,116.58 | 558.79   | 1,099.55 | 550.28   | 1,098.57 | 549.79   | 9     |
| 13 | 1,507.86 | 754.43 | 1,490.83 | 745.92 | 1,489.85 | 745.43 | H   | 1,017.51 | 509.26   | 1,000.48 | 500.75   | 999.50   | 500.25   | 8     |
| 14 | 1,608.91 | 804.96 | 1,591.88 | 796.44 | 1,590.90 | 795.95 | T   | 880.45   | 440.73   | 863.43   | 432.22   | 862.44   | 431.72   | 7     |

|    |          |          |          |          |          |          |   |        |        |        |        |        |        |   |
|----|----------|----------|----------|----------|----------|----------|---|--------|--------|--------|--------|--------|--------|---|
| 15 | 1,721.99 | 861.50   | 1,704.97 | 852.99   | 1,703.98 | 852.49   | L | 779.40 | 390.21 | 762.38 | 381.69 | 761.39 | 381.20 | 6 |
| 16 | 1,850.05 | 925.53   | 1,833.02 | 917.02   | 1,832.04 | 916.52   | Q | 666.32 | 333.66 | 649.29 | 325.15 | 648.31 | 324.66 | 5 |
| 17 | 1,951.10 | 976.05   | 1,934.07 | 967.54   | 1,933.09 | 967.05   | T | 538.26 | 269.63 | 521.24 | 261.12 | 520.25 | 260.63 | 4 |
| 18 | 2,066.13 | 1,033.57 | 2,049.10 | 1,025.05 | 2,048.11 | 1,024.56 | D | 437.21 | 219.11 | 420.19 | 210.60 | 419.20 | 210.11 | 3 |
| 19 | 2,213.19 | 1,107.10 | 2,196.17 | 1,098.59 | 2,195.18 | 1,098.10 | F | 322.19 | 161.60 | 305.16 | 153.08 |        |        | 2 |
| 20 |          |          |          |          |          |          | R | 175.12 | 88.06  | 158.09 | 79.55  |        |        | 1 |

Query 17889 Hit 1

MS/MS Fragmentation of **AFLLSLAALR**

Found in **sp|Q81V08|PLD3\_HUMAN**, Phospholipase D3 OS=Homo sapiens GN=PLD3 PE=1 SV=1

Match to Query 17889: 1217.763from(609.8889,2+)

Title: 983: Scan 2251 (rt=59.7623, f=3, i=339) [D:\lab212\membrane\Grace\Joyce\iTRAQ\_23\_1.raw]

Data File: Submitted from 20120508-1(merge) by Mascot Daemon on JOYCE-VAIO

Monoisotopic mass of neutral peptide Mr(calc): 1217.763

Variable modifications:

Ions Score: 57.94 Expect: 0.001

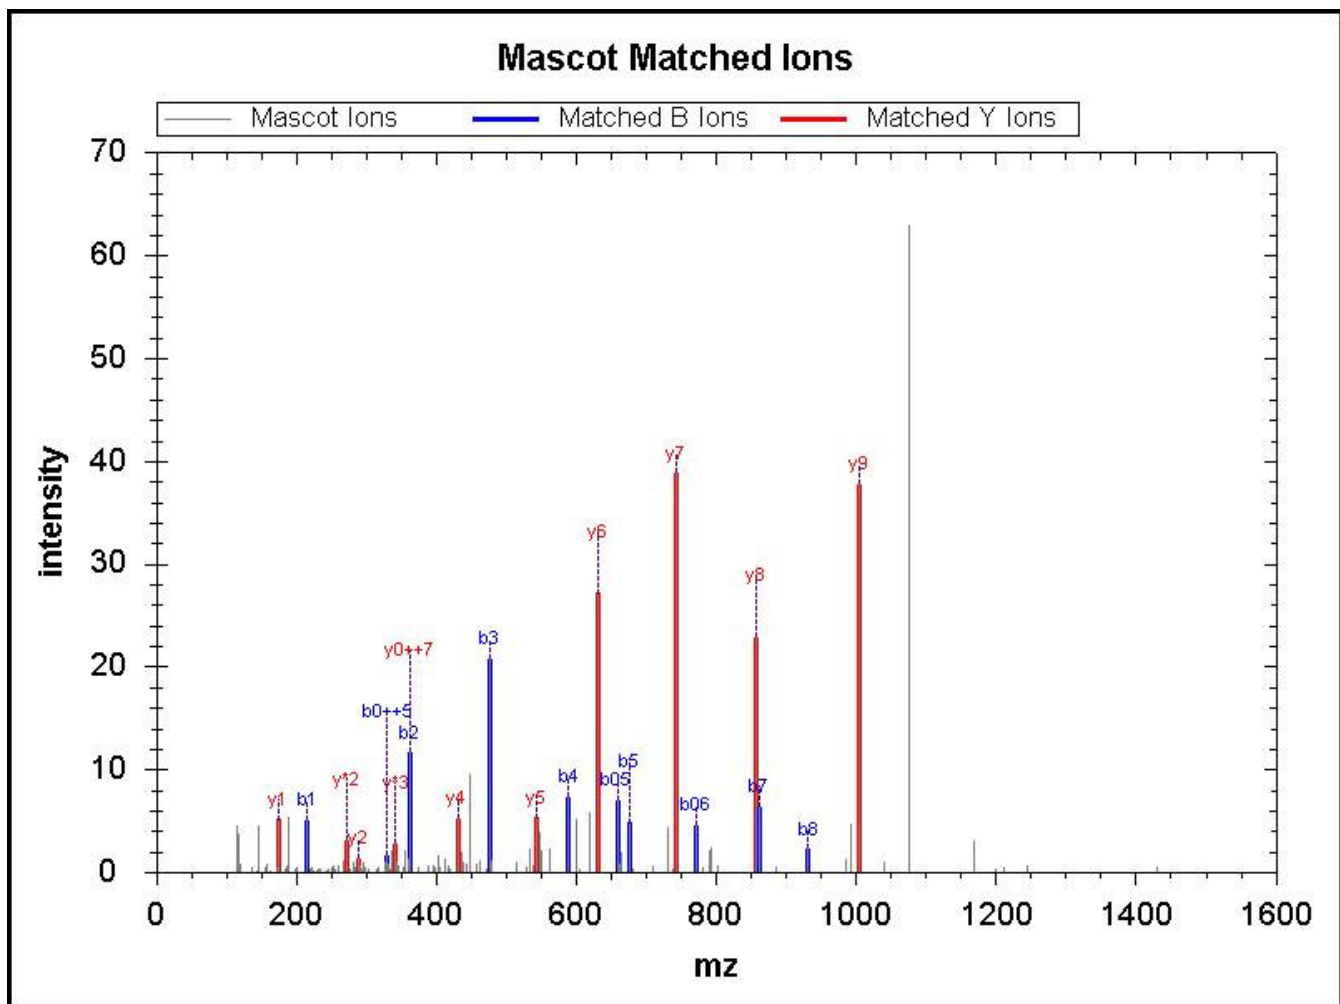

| No | b        | b++    | b0       | b0++   | Seq | y        | y++    | y*     | y*++   | y0     | y0++   | RevNo |
|----|----------|--------|----------|--------|-----|----------|--------|--------|--------|--------|--------|-------|
| 1  | 216.15   | 108.58 |          |        | A   |          |        |        |        |        |        | 10    |
| 2  | 363.21   | 182.11 |          |        | F   | 1,003.63 | 502.32 | 986.60 | 493.81 | 985.62 | 493.31 | 9     |
| 3  | 476.30   | 238.65 |          |        | L   | 856.56   | 428.78 | 839.53 | 420.27 | 838.55 | 419.78 | 8     |
| 4  | 589.38   | 295.20 |          |        | L   | 743.48   | 372.24 | 726.45 | 363.73 | 725.47 | 363.24 | 7     |
| 5  | 676.42   | 338.71 | 658.40   | 329.71 | S   | 630.39   | 315.70 | 613.37 | 307.19 | 612.38 | 306.70 | 6     |
| 6  | 789.50   | 395.25 | 771.49   | 386.25 | L   | 543.36   | 272.18 | 526.33 | 263.67 |        |        | 5     |
| 7  | 860.54   | 430.77 | 842.53   | 421.77 | A   | 430.28   | 215.64 | 413.25 | 207.13 |        |        | 4     |
| 8  | 931.57   | 466.29 | 913.56   | 457.29 | A   | 359.24   | 180.12 | 342.21 | 171.61 |        |        | 3     |
| 9  | 1,044.66 | 522.83 | 1,026.65 | 513.83 | L   | 288.20   | 144.61 | 271.18 | 136.09 |        |        | 2     |

|    |  |  |  |   |        |       |        |       |  |  |   |
|----|--|--|--|---|--------|-------|--------|-------|--|--|---|
| 10 |  |  |  | R | 175.12 | 88.06 | 158.09 | 79.55 |  |  | 1 |
|----|--|--|--|---|--------|-------|--------|-------|--|--|---|

Query 83695 Hit 1

MS/MS Fragmentation of **DKEWQEQLIPNLALIDK**

Found in **sp|Q9UFN0|NPS3A\_HUMAN**, Protein NipSnap homolog 3A OS=Homo sapiens GN=NIPSNAP3A PE=1 SV=2

Match to Query 83695: 2631.465from(878.1622,3+)

Title: 997: Sum of 2 scans in range 2198 (rt=59.0853, f=4, i=670) to 2199 (rt=59.1107, f=4, i=671)

[D:\lab212\membrane\Grace\Joyce\iTRAQ\_42\_1.raw]

Data File: Submitted from 20120508-1(merge) by Mascot Daemon on JOYCE-VAIO

Monoisotopic mass of neutral peptide Mr(calc): 2631.465

Variable modifications:

K2 iTRAQ4plex (K)

K18 iTRAQ4plex (K)

Ions Score: 57.94 Expect: 0.001

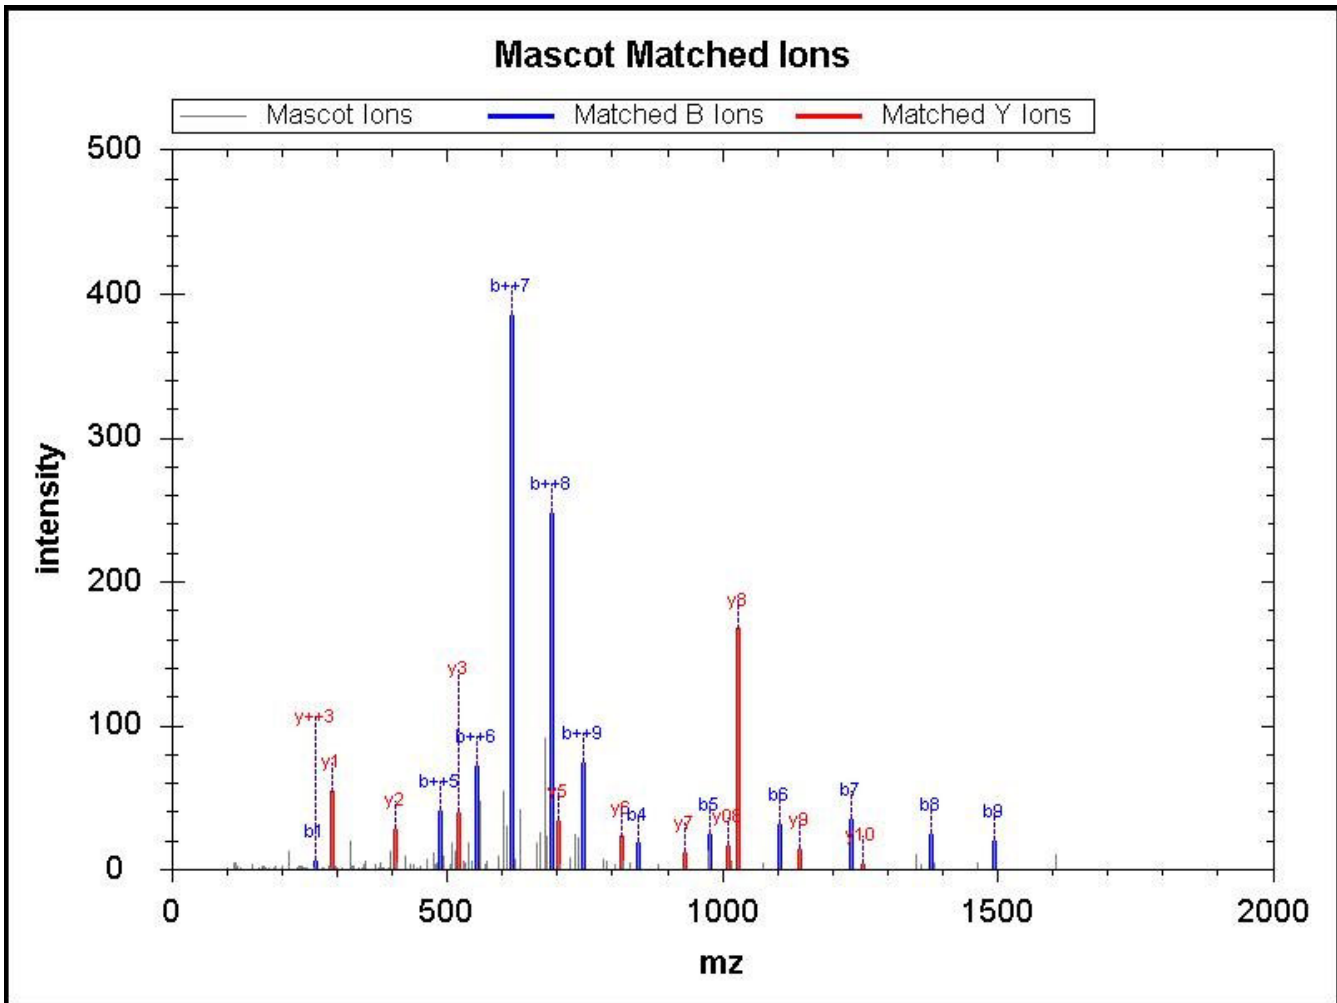

| No | b        | b++    | b*       | b*++   | b0       | b0++   | Seq | y        | y++      | y*       | y*++     | y0       | y0++     | RevNo |
|----|----------|--------|----------|--------|----------|--------|-----|----------|----------|----------|----------|----------|----------|-------|
| 1  | 260.14   | 130.57 |          |        | 242.13   | 121.57 | D   |          |          |          |          |          |          | 18    |
| 2  | 532.33   | 266.67 | 515.31   | 258.16 | 514.32   | 257.67 | K   | 2,373.34 | 1,187.17 | 2,356.32 | 1,178.66 | 2,355.33 | 1,178.17 | 17    |
| 3  | 661.38   | 331.19 | 644.35   | 322.68 | 643.37   | 322.19 | E   | 2,101.15 | 1,051.08 | 2,084.12 | 1,042.56 | 2,083.13 | 1,042.07 | 16    |
| 4  | 847.46   | 424.23 | 830.43   | 415.72 | 829.44   | 415.23 | W   | 1,972.10 | 986.55   | 1,955.08 | 978.04   | 1,954.09 | 977.55   | 15    |
| 5  | 975.51   | 488.26 | 958.49   | 479.75 | 957.50   | 479.26 | Q   | 1,786.02 | 893.52   | 1,769.00 | 885.00   | 1,768.01 | 884.51   | 14    |
| 6  | 1,104.56 | 552.78 | 1,087.53 | 544.27 | 1,086.55 | 543.78 | E   | 1,657.96 | 829.49   | 1,640.94 | 820.97   | 1,639.95 | 820.48   | 13    |
| 7  | 1,232.62 | 616.81 | 1,215.59 | 608.30 | 1,214.60 | 607.81 | Q   | 1,528.92 | 764.96   | 1,511.90 | 756.45   | 1,510.91 | 755.96   | 12    |
| 8  | 1,379.68 | 690.35 | 1,362.66 | 681.83 | 1,361.67 | 681.34 | F   | 1,400.86 | 700.94   | 1,383.84 | 692.42   | 1,382.85 | 691.93   | 11    |
| 9  | 1,492.77 | 746.89 | 1,475.74 | 738.37 | 1,474.76 | 737.88 | L   | 1,253.79 | 627.40   | 1,236.77 | 618.89   | 1,235.78 | 618.40   | 10    |
| 10 | 1,605.85 | 803.43 | 1,588.83 | 794.92 | 1,587.84 | 794.42 | I   | 1,140.71 | 570.86   | 1,123.68 | 562.35   | 1,122.70 | 561.85   | 9     |
| 11 | 1,702.90 | 851.96 | 1,685.88 | 843.44 | 1,684.89 | 842.95 | P   | 1,027.63 | 514.32   | 1,010.60 | 505.80   | 1,009.62 | 505.31   | 8     |

|    |          |          |          |          |          |          |   |        |        |        |        |        |        |   |
|----|----------|----------|----------|----------|----------|----------|---|--------|--------|--------|--------|--------|--------|---|
| 12 | 1,816.95 | 908.98   | 1,799.92 | 900.46   | 1,798.94 | 899.97   | N | 930.57 | 465.79 | 913.55 | 457.28 | 912.56 | 456.79 | 7 |
| 13 | 1,930.03 | 965.52   | 1,913.01 | 957.01   | 1,912.02 | 956.51   | L | 816.53 | 408.77 | 799.50 | 400.26 | 798.52 | 399.76 | 6 |
| 14 | 2,001.07 | 1,001.04 | 1,984.04 | 992.52   | 1,983.06 | 992.03   | A | 703.45 | 352.23 | 686.42 | 343.71 | 685.44 | 343.22 | 5 |
| 15 | 2,114.15 | 1,057.58 | 2,097.13 | 1,049.07 | 2,096.14 | 1,048.57 | L | 632.41 | 316.71 | 615.38 | 308.20 | 614.40 | 307.70 | 4 |
| 16 | 2,227.24 | 1,114.12 | 2,210.21 | 1,105.61 | 2,209.23 | 1,105.12 | I | 519.33 | 260.17 | 502.30 | 251.65 | 501.32 | 251.16 | 3 |
| 17 | 2,342.26 | 1,171.64 | 2,325.24 | 1,163.12 | 2,324.25 | 1,162.63 | D | 406.24 | 203.62 | 389.22 | 195.11 | 388.23 | 194.62 | 2 |
| 18 |          |          |          |          |          |          | K | 291.21 | 146.11 | 274.19 | 137.60 |        |        | 1 |

Query 27637 Hit 1

MS/MS Fragmentation of **LWNLLMPTK**

Found in **sp|Q8IZ81|ELMD2\_HUMAN**, ELMO domain-containing protein 2 OS=Homo sapiens GN=ELMOD2 PE=1 SV=1

Match to Query 27637: 1402.823from(702.4189,2+)

Title: 931: Scan 2140 (rt=57.156, f=3, i=312) [D:\lab212\membrane\Grace\Joyce\iTRAQ\_29\_1.raw]

Data File: Submitted from 20120508-1(merge) by Mascot Daemon on JOYCE-VAIO

Monoisotopic mass of neutral peptide Mr(calc): 1402.823

Variable modifications:

K9 iTRAQ4plex (K)

Ions Score: 57.77 Expect: 0.001

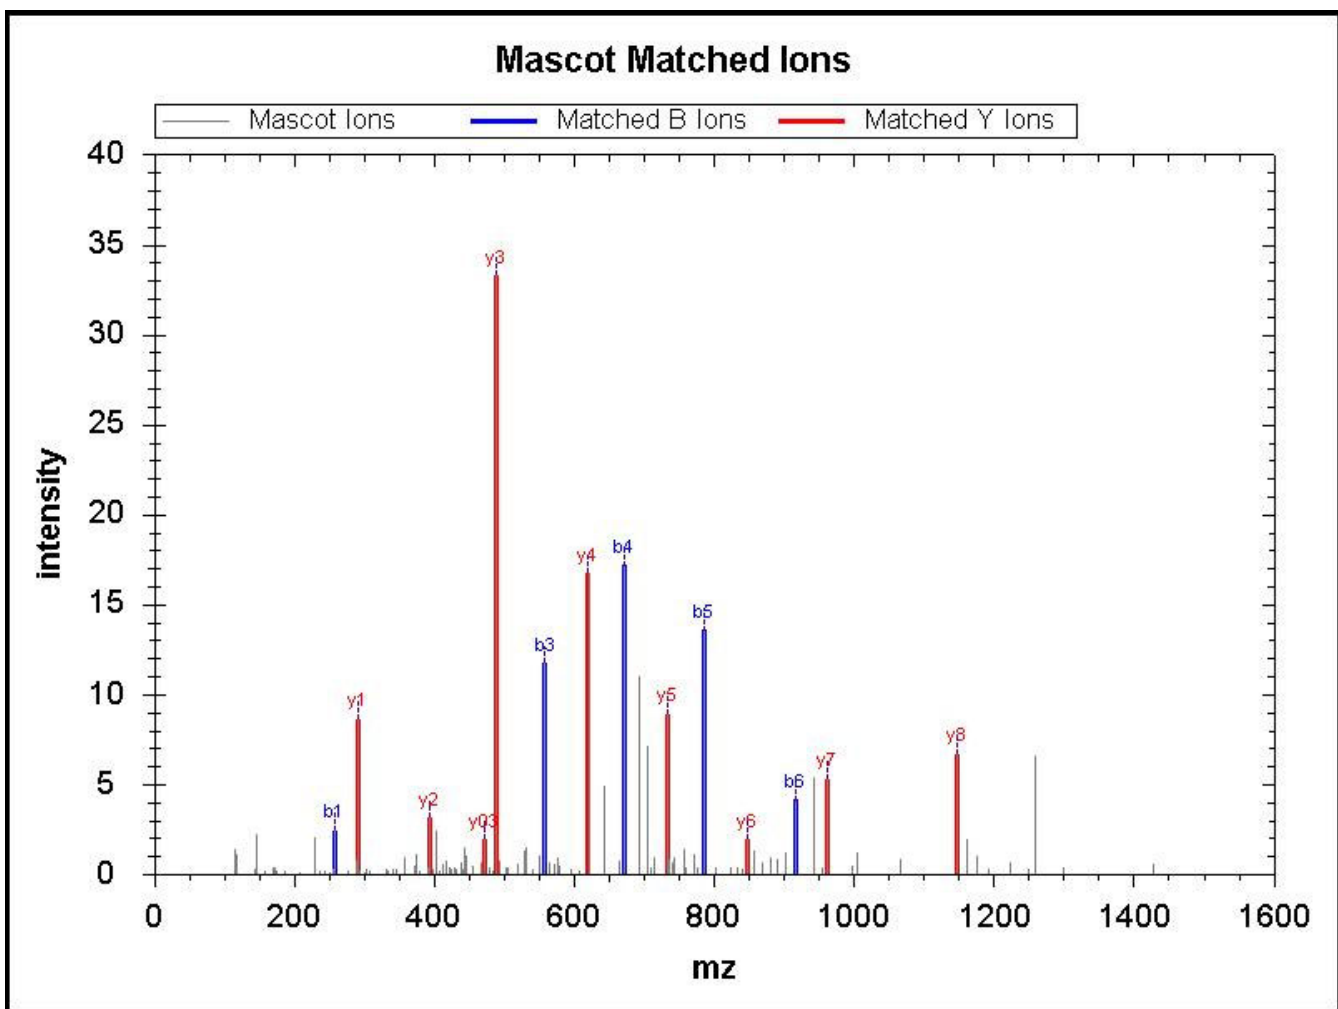

| No | b        | b++    | b*     | b*++   | b0 | b0++ | Seq | y        | y++    | y*       | y*++   | y0       | y0++   | RevNo |
|----|----------|--------|--------|--------|----|------|-----|----------|--------|----------|--------|----------|--------|-------|
| 1  | 258.19   | 129.60 |        |        |    |      | L   |          |        |          |        |          |        | 9     |
| 2  | 444.27   | 222.64 |        |        |    |      | W   | 1,146.65 | 573.83 | 1,129.62 | 565.31 | 1,128.64 | 564.82 | 8     |
| 3  | 558.32   | 279.66 | 541.29 | 271.15 |    |      | N   | 960.57   | 480.79 | 943.54   | 472.27 | 942.56   | 471.78 | 7     |
| 4  | 671.40   | 336.20 | 654.37 | 327.69 |    |      | L   | 846.52   | 423.77 | 829.50   | 415.25 | 828.51   | 414.76 | 6     |
| 5  | 784.48   | 392.75 | 767.46 | 384.23 |    |      | L   | 733.44   | 367.22 | 716.41   | 358.71 | 715.43   | 358.22 | 5     |
| 6  | 915.52   | 458.27 | 898.50 | 449.75 |    |      | M   | 620.36   | 310.68 | 603.33   | 302.17 | 602.35   | 301.68 | 4     |
| 7  | 1,012.58 | 506.79 | 995.55 | 498.28 |    |      | P   | 489.32   | 245.16 | 472.29   | 236.65 | 471.30   | 236.16 | 3     |

|   |          |        |          |        |          |        |   |        |        |        |        |        |        |   |
|---|----------|--------|----------|--------|----------|--------|---|--------|--------|--------|--------|--------|--------|---|
| 8 | 1,113.62 | 557.32 | 1,096.60 | 548.80 | 1,095.61 | 548.31 | T | 392.26 | 196.63 | 375.24 | 188.12 | 374.25 | 187.63 | 2 |
| 9 |          |        |          |        |          |        | K | 291.21 | 146.11 | 274.19 | 137.60 |        |        | 1 |

Query 71343 Hit 1

MS/MS Fragmentation of **GANIQLLDLPGIIEGAAQGK**

Found in **sp|P55039|DRG2\_HUMAN**, Developmentally-regulated GTP-binding protein 2 OS=Homo sapiens GN=DRG2 PE=1 SV=1

Match to Query 71343: 2265.292from(756.1047,3+)

Title: 1107: Sum of 2 scans in range 2431 (rt=64.1646, f=4, i=731) to 2432 (rt=64.19, f=4, i=732)

[D:\lab212\membrane\GraceJoyce\iTRAQ\_26\_2.raw]

Data File: Submitted from 20120508-1(merge) by Mascot Daemon on JOYCE-VAIO

Monoisotopic mass of neutral peptide Mr(calc): 2265.292

Variable modifications:

K20 iTRAQ4plex (K)

Ions Score: 57.6 Expect: 0.001

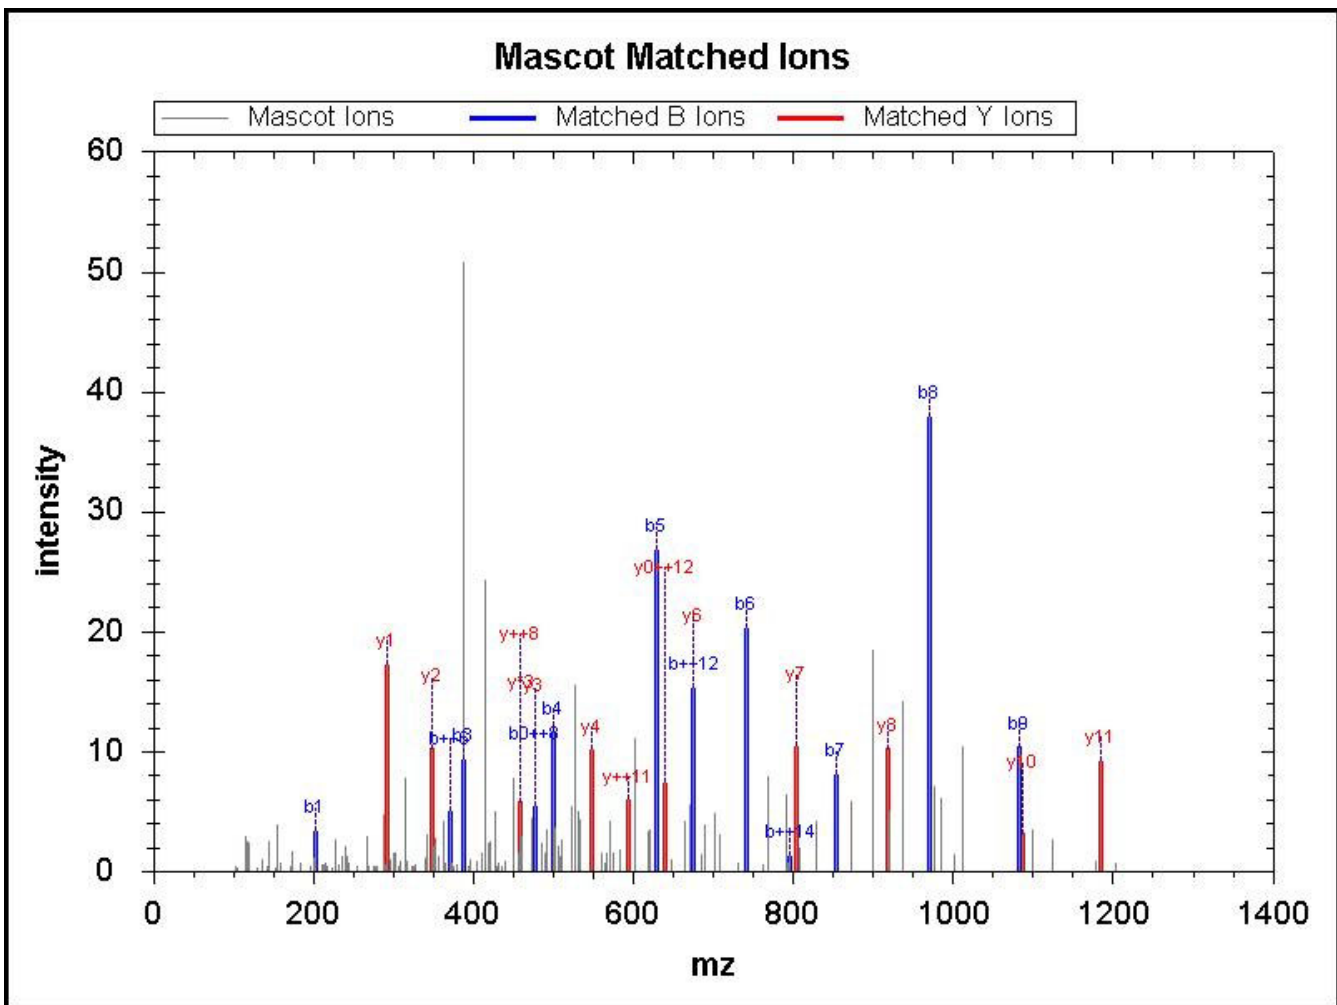

| No | b        | b++    | b*       | b*++   | b0       | b0++   | Seq | y        | y++      | y*       | y*++     | y0       | y0++     | RevNo |
|----|----------|--------|----------|--------|----------|--------|-----|----------|----------|----------|----------|----------|----------|-------|
| 1  | 202.13   | 101.57 |          |        |          |        | G   |          |          |          |          |          |          | 20    |
| 2  | 273.17   | 137.09 |          |        |          |        | A   | 2,065.18 | 1,033.09 | 2,048.15 | 1,024.58 | 2,047.17 | 1,024.09 | 19    |
| 3  | 387.21   | 194.11 | 370.18   | 185.60 |          |        | N   | 1,994.14 | 997.57   | 1,977.11 | 989.06   | 1,976.13 | 988.57   | 18    |
| 4  | 500.29   | 250.65 | 483.27   | 242.14 |          |        | I   | 1,880.10 | 940.55   | 1,863.07 | 932.04   | 1,862.09 | 931.55   | 17    |
| 5  | 628.35   | 314.68 | 611.33   | 306.17 |          |        | Q   | 1,767.01 | 884.01   | 1,749.99 | 875.50   | 1,749.00 | 875.01   | 16    |
| 6  | 741.44   | 371.22 | 724.41   | 362.71 |          |        | L   | 1,638.95 | 819.98   | 1,621.93 | 811.47   | 1,620.94 | 810.98   | 15    |
| 7  | 854.52   | 427.76 | 837.50   | 419.25 |          |        | L   | 1,525.87 | 763.44   | 1,508.84 | 754.93   | 1,507.86 | 754.43   | 14    |
| 8  | 969.55   | 485.28 | 952.52   | 476.76 | 951.54   | 476.27 | D   | 1,412.79 | 706.90   | 1,395.76 | 698.38   | 1,394.78 | 697.89   | 13    |
| 9  | 1,082.63 | 541.82 | 1,065.61 | 533.31 | 1,064.62 | 532.81 | L   | 1,297.76 | 649.38   | 1,280.73 | 640.87   | 1,279.75 | 640.38   | 12    |
| 10 | 1,179.69 | 590.35 | 1,162.66 | 581.83 | 1,161.67 | 581.34 | P   | 1,184.68 | 592.84   | 1,167.65 | 584.33   | 1,166.66 | 583.84   | 11    |
| 11 | 1,236.71 | 618.86 | 1,219.68 | 610.34 | 1,218.70 | 609.85 | G   | 1,087.62 | 544.32   | 1,070.60 | 535.80   | 1,069.61 | 535.31   | 10    |



|    |          |        |          |        |          |        |   |          |        |          |        |          |        |   |
|----|----------|--------|----------|--------|----------|--------|---|----------|--------|----------|--------|----------|--------|---|
| 12 | 1,349.79 | 675.40 | 1,332.76 | 666.89 | 1,331.78 | 666.39 | I | 1,030.60 | 515.80 | 1,013.57 | 507.29 | 1,012.59 | 506.80 | 9 |
| 13 | 1,462.88 | 731.94 | 1,445.85 | 723.43 | 1,444.86 | 722.94 | I | 917.52   | 459.26 | 900.49   | 450.75 | 899.51   | 450.26 | 8 |
| 14 | 1,591.92 | 796.46 | 1,574.89 | 787.95 | 1,573.91 | 787.46 | E | 804.43   | 402.72 | 787.41   | 394.21 | 786.42   | 393.71 | 7 |
| 15 | 1,648.94 | 824.97 | 1,631.91 | 816.46 | 1,630.93 | 815.97 | G | 675.39   | 338.20 | 658.36   | 329.69 |          |        | 6 |
| 16 | 1,719.98 | 860.49 | 1,702.95 | 851.98 | 1,701.97 | 851.49 | A | 618.37   | 309.69 | 601.34   | 301.17 |          |        | 5 |
| 17 | 1,791.01 | 896.01 | 1,773.99 | 887.50 | 1,773.00 | 887.01 | A | 547.33   | 274.17 | 530.31   | 265.66 |          |        | 4 |
| 18 | 1,919.07 | 960.04 | 1,902.05 | 951.53 | 1,901.06 | 951.03 | Q | 476.29   | 238.65 | 459.27   | 230.14 |          |        | 3 |
| 19 | 1,976.09 | 988.55 | 1,959.07 | 980.04 | 1,958.08 | 979.55 | G | 348.24   | 174.62 | 331.21   | 166.11 |          |        | 2 |
| 20 |          |        |          |        |          |        | K | 291.21   | 146.11 | 274.19   | 137.60 |          |        | 1 |

Query 87223 Hit 1

MS/MS Fragmentation of **VTNVGSLLLTPQENESLFTFLGK**

Found in **sp|O00401|WASL\_HUMAN**, Neural Wiskott-Aldrich syndrome protein OS=Homo sapiens GN=WASL PE=1 SV=2

Match to Query 87223: 2794.528from(932.5166,3+)

Title: 1149: Scan 2641 (rt=68.302, f=2, i=418) [D:\lab212\membrane\Grace\Joyce\iTRAQ\_24\_1.raw]

Data File: Submitted from 20120508-1(merge) by Mascot Daemon on JOYCE-VAIO

Monoisotopic mass of neutral peptide Mr(calc): 2794.528

Variable modifications:

K23 iTRAQ4plex (K)

Ions Score: 57.44 Expect: 0.001

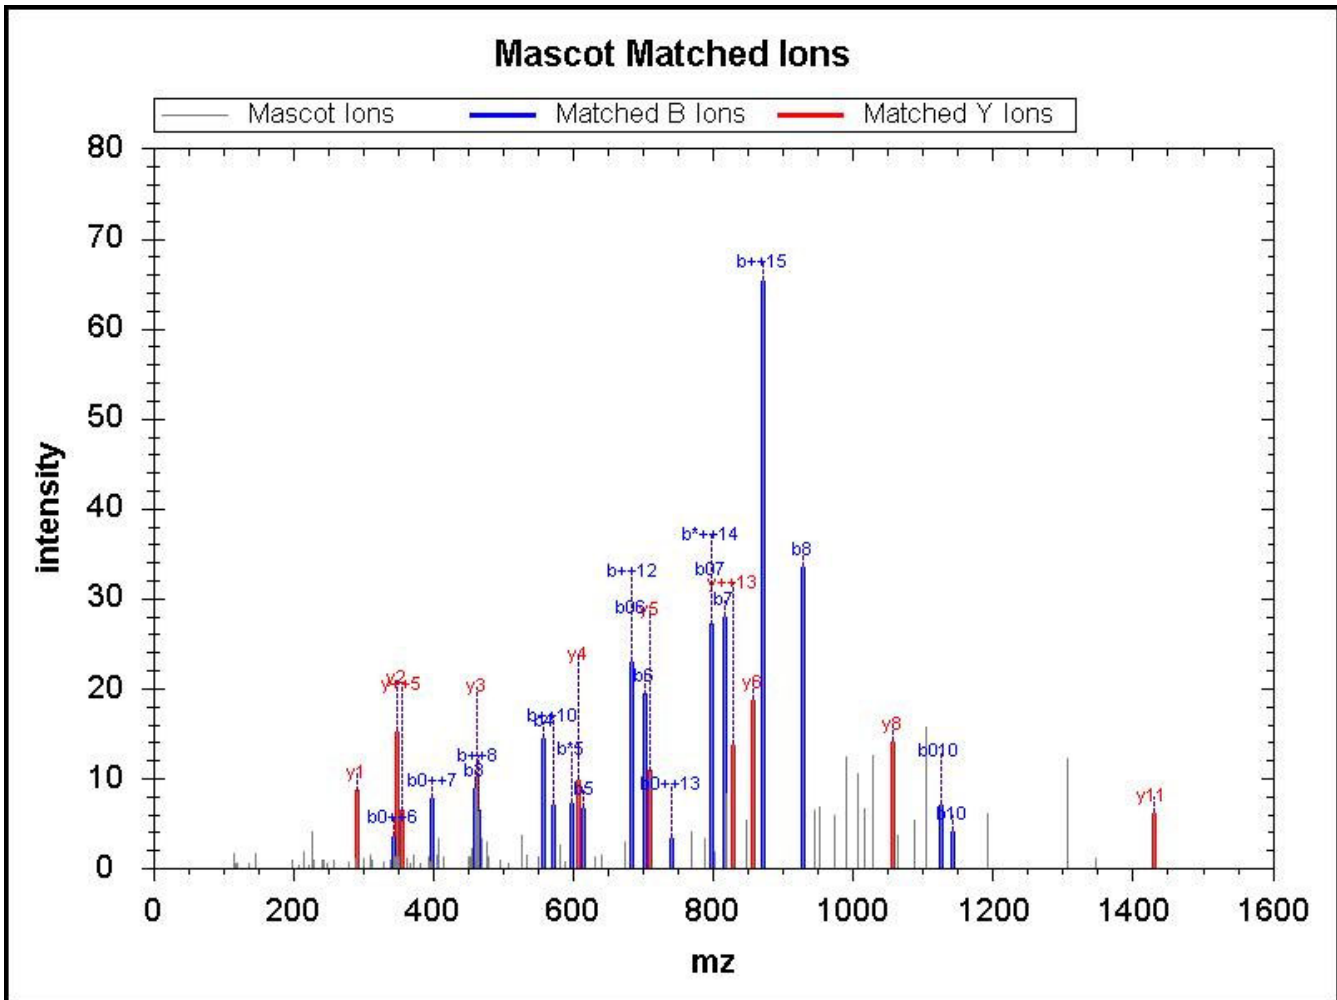

| No | b      | b++    | b*     | b*++   | b0     | b0++   | Seq | y        | y++      | y*       | y*++     | y0       | y0++     | RevNo |
|----|--------|--------|--------|--------|--------|--------|-----|----------|----------|----------|----------|----------|----------|-------|
| 1  | 244.18 | 122.59 |        |        |        |        | V   |          |          |          |          |          |          | 23    |
| 2  | 345.23 | 173.12 |        |        | 327.21 | 164.11 | T   | 2,552.37 | 1,276.69 | 2,535.35 | 1,268.18 | 2,534.36 | 1,267.68 | 22    |
| 3  | 459.27 | 230.14 | 442.24 | 221.62 | 441.26 | 221.13 | N   | 2,451.33 | 1,226.17 | 2,434.30 | 1,217.65 | 2,433.31 | 1,217.16 | 21    |
| 4  | 558.34 | 279.67 | 541.31 | 271.16 | 540.33 | 270.67 | V   | 2,337.28 | 1,169.14 | 2,320.26 | 1,160.63 | 2,319.27 | 1,160.14 | 20    |
| 5  | 615.36 | 308.18 | 598.33 | 299.67 | 597.35 | 299.18 | G   | 2,238.21 | 1,119.61 | 2,221.19 | 1,111.10 | 2,220.20 | 1,110.61 | 19    |

|    |          |          |          |          |          |          |   |          |          |          |          |          |          |    |
|----|----------|----------|----------|----------|----------|----------|---|----------|----------|----------|----------|----------|----------|----|
| 6  | 702.39   | 351.70   | 685.36   | 343.19   | 684.38   | 342.69   | S | 2,181.19 | 1,091.10 | 2,164.17 | 1,082.59 | 2,163.18 | 1,082.09 | 18 |
| 7  | 815.47   | 408.24   | 798.45   | 399.73   | 797.46   | 399.24   | L | 2,094.16 | 1,047.58 | 2,077.13 | 1,039.07 | 2,076.15 | 1,038.58 | 17 |
| 8  | 928.56   | 464.78   | 911.53   | 456.27   | 910.55   | 455.78   | L | 1,981.08 | 991.04   | 1,964.05 | 982.53   | 1,963.07 | 982.04   | 16 |
| 9  | 1,041.64 | 521.32   | 1,024.62 | 512.81   | 1,023.63 | 512.32   | L | 1,867.99 | 934.50   | 1,850.97 | 925.99   | 1,849.98 | 925.49   | 15 |
| 10 | 1,142.69 | 571.85   | 1,125.66 | 563.34   | 1,124.68 | 562.84   | T | 1,754.91 | 877.96   | 1,737.88 | 869.44   | 1,736.90 | 868.95   | 14 |
| 11 | 1,239.74 | 620.38   | 1,222.72 | 611.86   | 1,221.73 | 611.37   | P | 1,653.86 | 827.43   | 1,636.83 | 818.92   | 1,635.85 | 818.43   | 13 |
| 12 | 1,367.80 | 684.40   | 1,350.78 | 675.89   | 1,349.79 | 675.40   | Q | 1,556.81 | 778.91   | 1,539.78 | 770.39   | 1,538.80 | 769.90   | 12 |
| 13 | 1,496.84 | 748.93   | 1,479.82 | 740.41   | 1,478.83 | 739.92   | E | 1,428.75 | 714.88   | 1,411.72 | 706.36   | 1,410.74 | 705.87   | 11 |
| 14 | 1,610.89 | 805.95   | 1,593.86 | 797.43   | 1,592.88 | 796.94   | N | 1,299.71 | 650.36   | 1,282.68 | 641.84   | 1,281.70 | 641.35   | 10 |
| 15 | 1,739.93 | 870.47   | 1,722.90 | 861.96   | 1,721.92 | 861.46   | E | 1,185.66 | 593.34   | 1,168.64 | 584.82   | 1,167.65 | 584.33   | 9  |
| 16 | 1,826.96 | 913.98   | 1,809.94 | 905.47   | 1,808.95 | 904.98   | S | 1,056.62 | 528.81   | 1,039.59 | 520.30   | 1,038.61 | 519.81   | 8  |
| 17 | 1,940.05 | 970.53   | 1,923.02 | 962.01   | 1,922.04 | 961.52   | L | 969.59   | 485.30   | 952.56   | 476.78   | 951.58   | 476.29   | 7  |
| 18 | 2,087.11 | 1,044.06 | 2,070.09 | 1,035.55 | 2,069.10 | 1,035.06 | F | 856.50   | 428.76   | 839.48   | 420.24   | 838.49   | 419.75   | 6  |
| 19 | 2,188.16 | 1,094.58 | 2,171.14 | 1,086.07 | 2,170.15 | 1,085.58 | T | 709.44   | 355.22   | 692.41   | 346.71   | 691.43   | 346.22   | 5  |
| 20 | 2,335.23 | 1,168.12 | 2,318.20 | 1,159.61 | 2,317.22 | 1,159.11 | F | 608.39   | 304.70   | 591.36   | 296.18   |          |          | 4  |
| 21 | 2,448.31 | 1,224.66 | 2,431.29 | 1,216.15 | 2,430.30 | 1,215.66 | L | 461.32   | 231.16   | 444.29   | 222.65   |          |          | 3  |
| 22 | 2,505.34 | 1,253.17 | 2,488.31 | 1,244.66 | 2,487.33 | 1,244.17 | G | 348.24   | 174.62   | 331.21   | 166.11   |          |          | 2  |
| 23 |          |          |          |          |          |          | K | 291.21   | 146.11   | 274.19   | 137.60   |          |          | 1  |

Query 73337 Hit 1

MS/MS Fragmentation of **SIVQELQQWAHEFADVK**

Found in **sp|E9Q555|RN213\_MOUSE**, E3 ubiquitin-protein ligase RNF213 OS=Mus musculus GN=Rnf213 PE=2 SV=1

Match to Query 73337: 2315.219from(772.747,3+)

Title: 1246: Scan 2738 (rt=71.1743, f=3, i=425) [D:\lab212\membrane\Grace\Joyce\iTRAQ\_39\_1.raw]

Data File: Submitted from 20120508-1(merge) by Mascot Daemon on JOYCE-VAIO

Monoisotopic mass of neutral peptide Mr(calc): 2315.219

Variable modifications:

K17 iTRAQ4plex (K)

Ions Score: 57.35 Expect: 0.002

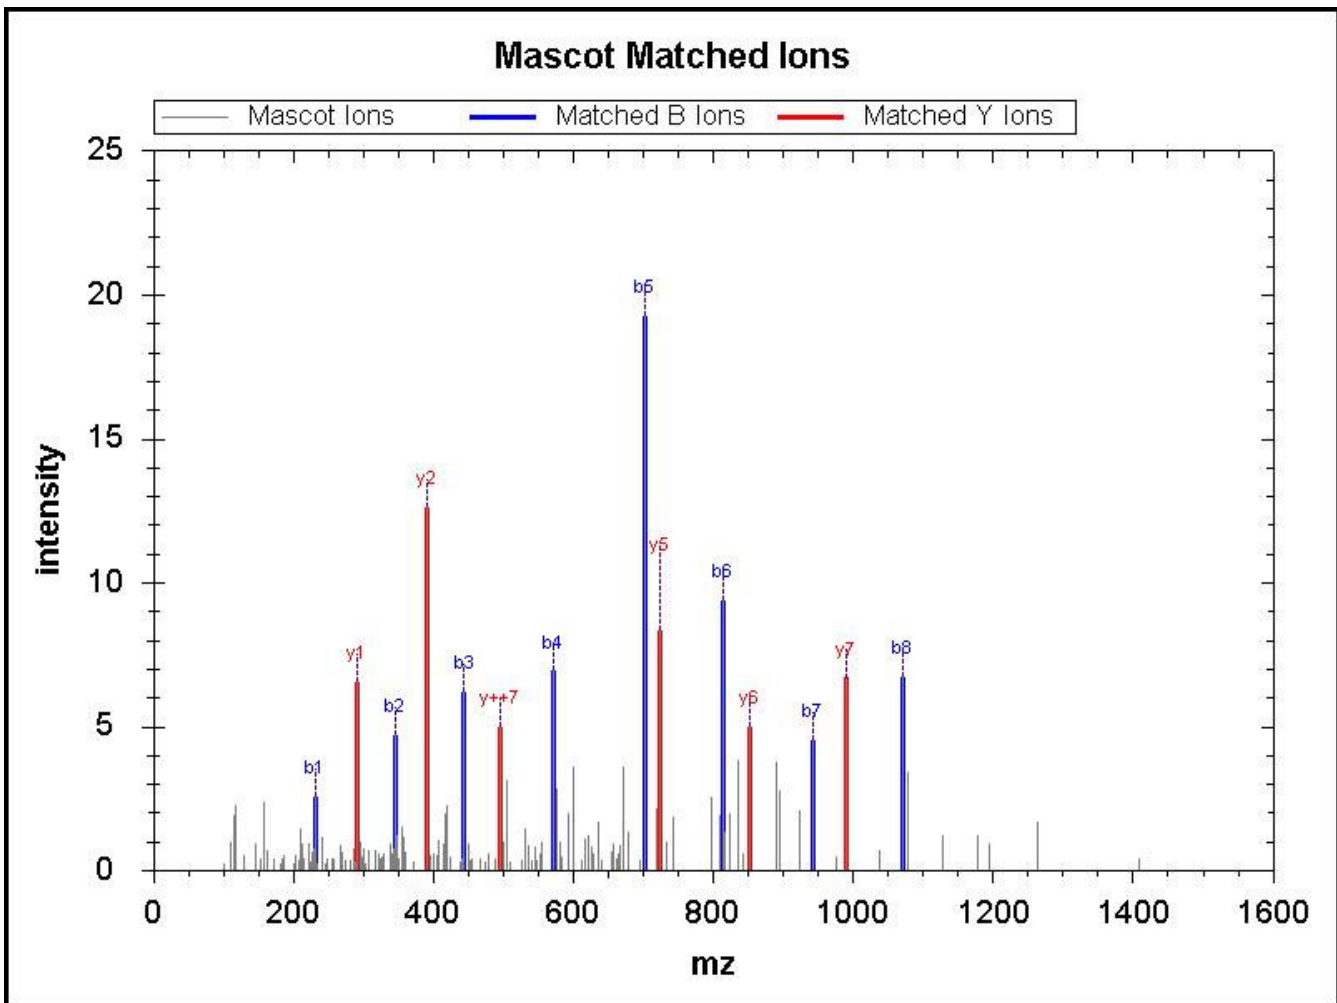

| No | b        | b++      | b*       | b*++     | b0       | b0++     | Seq | y        | y++      | y*       | y*++     | y0       | y0++     | RevNo |
|----|----------|----------|----------|----------|----------|----------|-----|----------|----------|----------|----------|----------|----------|-------|
| 1  | 232.14   | 116.57   |          |          | 214.13   | 107.57   | S   |          |          |          |          |          |          | 17    |
| 2  | 345.23   | 173.12   |          |          | 327.21   | 164.11   | I   | 2,085.09 | 1,043.05 | 2,068.06 | 1,034.53 | 2,067.08 | 1,034.04 | 16    |
| 3  | 444.29   | 222.65   |          |          | 426.28   | 213.65   | V   | 1,972.00 | 986.51   | 1,954.98 | 977.99   | 1,953.99 | 977.50   | 15    |
| 4  | 572.35   | 286.68   | 555.33   | 278.17   | 554.34   | 277.67   | Q   | 1,872.94 | 936.97   | 1,855.91 | 928.46   | 1,854.93 | 927.97   | 14    |
| 5  | 701.40   | 351.20   | 684.37   | 342.69   | 683.38   | 342.20   | E   | 1,744.88 | 872.94   | 1,727.85 | 864.43   | 1,726.87 | 863.94   | 13    |
| 6  | 814.48   | 407.74   | 797.45   | 399.23   | 796.47   | 398.74   | L   | 1,615.84 | 808.42   | 1,598.81 | 799.91   | 1,597.82 | 799.42   | 12    |
| 7  | 942.54   | 471.77   | 925.51   | 463.26   | 924.53   | 462.77   | Q   | 1,502.75 | 751.88   | 1,485.72 | 743.37   | 1,484.74 | 742.87   | 11    |
| 8  | 1,070.60 | 535.80   | 1,053.57 | 527.29   | 1,052.59 | 526.80   | Q   | 1,374.69 | 687.85   | 1,357.67 | 679.34   | 1,356.68 | 678.84   | 10    |
| 9  | 1,256.68 | 628.84   | 1,239.65 | 620.33   | 1,238.67 | 619.84   | W   | 1,246.63 | 623.82   | 1,229.61 | 615.31   | 1,228.62 | 614.82   | 9     |
| 10 | 1,327.71 | 664.36   | 1,310.69 | 655.85   | 1,309.70 | 655.35   | A   | 1,060.55 | 530.78   | 1,043.53 | 522.27   | 1,042.54 | 521.78   | 8     |
| 11 | 1,464.77 | 732.89   | 1,447.75 | 724.38   | 1,446.76 | 723.88   | H   | 989.52   | 495.26   | 972.49   | 486.75   | 971.51   | 486.26   | 7     |
| 12 | 1,593.81 | 797.41   | 1,576.79 | 788.90   | 1,575.80 | 788.41   | E   | 852.46   | 426.73   | 835.43   | 418.22   | 834.45   | 417.73   | 6     |
| 13 | 1,740.88 | 870.95   | 1,723.86 | 862.43   | 1,722.87 | 861.94   | F   | 723.42   | 362.21   | 706.39   | 353.70   | 705.41   | 353.21   | 5     |
| 14 | 1,811.92 | 906.46   | 1,794.89 | 897.95   | 1,793.91 | 897.46   | A   | 576.35   | 288.68   | 559.32   | 280.16   | 558.34   | 279.67   | 4     |
| 15 | 1,926.95 | 963.98   | 1,909.92 | 955.46   | 1,908.94 | 954.97   | D   | 505.31   | 253.16   | 488.28   | 244.65   | 487.30   | 244.15   | 3     |
| 16 | 2,026.02 | 1,013.51 | 2,008.99 | 1,005.00 | 2,008.00 | 1,004.51 | V   | 390.28   | 195.65   | 373.26   | 187.13   |          |          | 2     |
| 17 |          |          |          |          |          |          | K   | 291.21   | 146.11   | 274.19   | 137.60   |          |          | 1     |

Query 83357 Hit 1

MS/MS Fragmentation of **RLEGDTALQGVSHIIVDEVHER**

Found in **sp|Q6P158|DHX57\_HUMAN**, Putative ATP-dependent RNA helicase DHX57 OS=Homo sapiens GN=DHX57 PE=1 SV=2  
 Match to Query 83357: 2616.379from(524.2831,5+)

Title: 741: Scan 1620 (rt=46.1591, f=3, i=253) [D:\lab212\membrane\Grace\Joyce\iTRAQ\_51\_1.raw]

Data File: Submitted from 20120508-1(merge) by Mascot Daemon on JOYCE-VAIO

Monoisotopic mass of neutral peptide Mr(calc): 2616.379

Variable modifications:  
 Ions Score: 57.34 Expect: 0.002

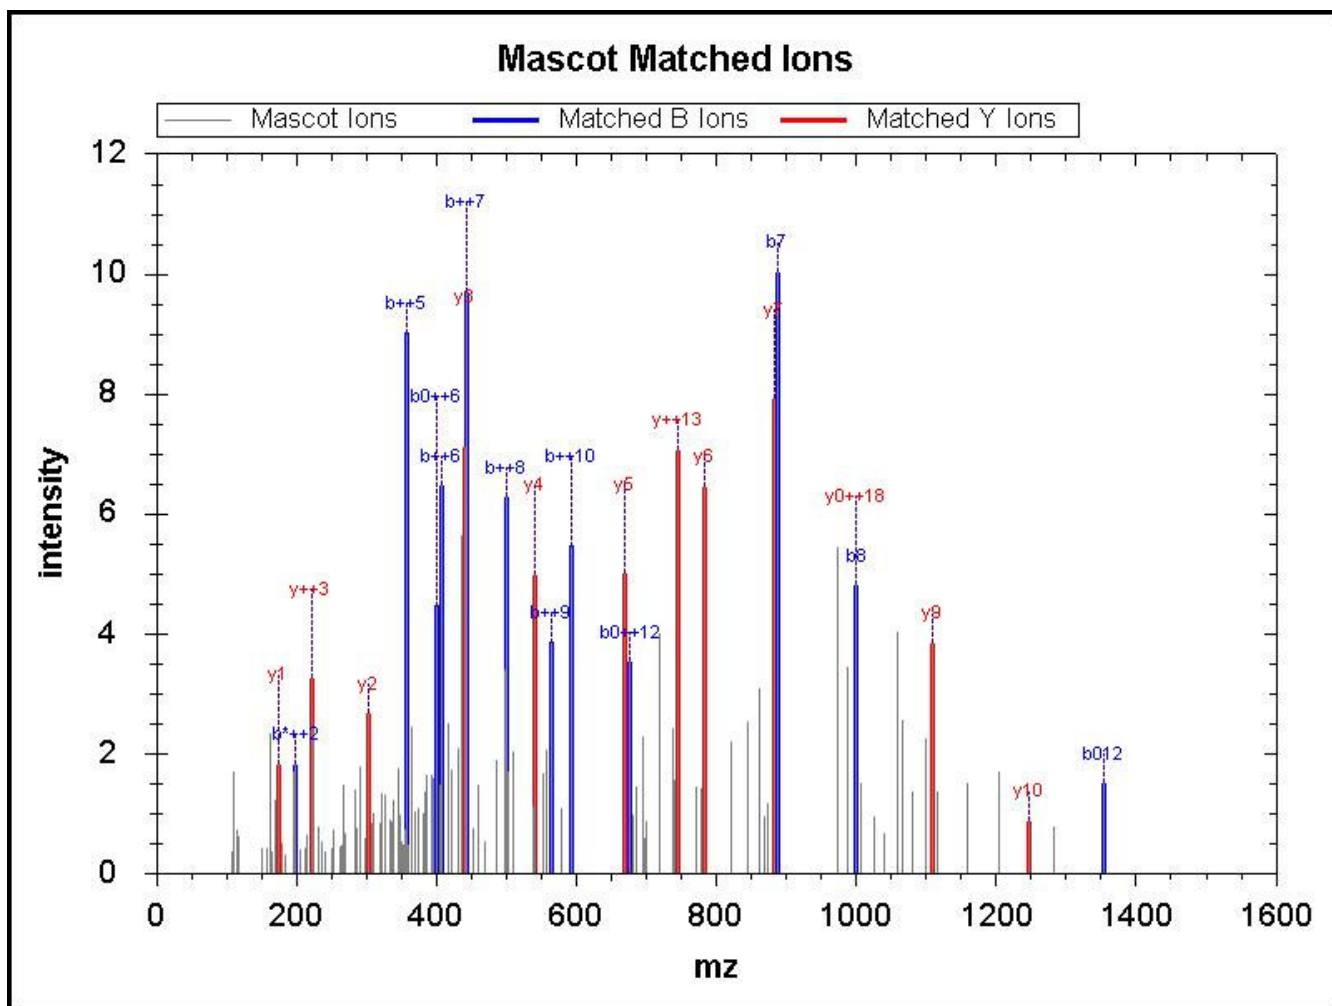

| No | b        | b++      | b*       | b***     | b0       | b0++     | Seq | y        | y++      | y*       | y***     | y0       | y0++     | RevNo |
|----|----------|----------|----------|----------|----------|----------|-----|----------|----------|----------|----------|----------|----------|-------|
| 1  | 301.21   | 151.11   | 284.18   | 142.60   |          |          | R   |          |          |          |          |          |          | 22    |
| 2  | 414.29   | 207.65   | 397.27   | 199.14   |          |          | L   | 2,317.18 | 1,159.09 | 2,300.15 | 1,150.58 | 2,299.17 | 1,150.09 | 21    |
| 3  | 543.34   | 272.17   | 526.31   | 263.66   | 525.33   | 263.17   | E   | 2,204.09 | 1,102.55 | 2,187.07 | 1,094.04 | 2,186.08 | 1,093.55 | 20    |
| 4  | 600.36   | 300.68   | 583.33   | 292.17   | 582.35   | 291.68   | G   | 2,075.05 | 1,038.03 | 2,058.02 | 1,029.52 | 2,057.04 | 1,029.02 | 19    |
| 5  | 715.39   | 358.20   | 698.36   | 349.68   | 697.37   | 349.19   | D   | 2,018.03 | 1,009.52 | 2,001.00 | 1,001.01 | 2,000.02 | 1,000.51 | 18    |
| 6  | 816.43   | 408.72   | 799.41   | 400.21   | 798.42   | 399.71   | T   | 1,903.00 | 952.01   | 1,885.98 | 943.49   | 1,884.99 | 943.00   | 17    |
| 7  | 887.47   | 444.24   | 870.44   | 435.73   | 869.46   | 435.23   | A   | 1,801.96 | 901.48   | 1,784.93 | 892.97   | 1,783.94 | 892.48   | 16    |
| 8  | 1,000.55 | 500.78   | 983.53   | 492.27   | 982.54   | 491.78   | L   | 1,730.92 | 865.96   | 1,713.89 | 857.45   | 1,712.91 | 856.96   | 15    |
| 9  | 1,128.61 | 564.81   | 1,111.59 | 556.30   | 1,110.60 | 555.80   | Q   | 1,617.83 | 809.42   | 1,600.81 | 800.91   | 1,599.82 | 800.42   | 14    |
| 10 | 1,185.63 | 593.32   | 1,168.61 | 584.81   | 1,167.62 | 584.32   | G   | 1,489.78 | 745.39   | 1,472.75 | 736.88   | 1,471.77 | 736.39   | 13    |
| 11 | 1,284.70 | 642.86   | 1,267.68 | 634.34   | 1,266.69 | 633.85   | V   | 1,432.75 | 716.88   | 1,415.73 | 708.37   | 1,414.74 | 707.88   | 12    |
| 12 | 1,371.73 | 686.37   | 1,354.71 | 677.86   | 1,353.72 | 677.37   | S   | 1,333.69 | 667.35   | 1,316.66 | 658.83   | 1,315.68 | 658.34   | 11    |
| 13 | 1,508.79 | 754.90   | 1,491.77 | 746.39   | 1,490.78 | 745.90   | H   | 1,246.65 | 623.83   | 1,229.63 | 615.32   | 1,228.64 | 614.83   | 10    |
| 14 | 1,621.88 | 811.44   | 1,604.85 | 802.93   | 1,603.87 | 802.44   | I   | 1,109.59 | 555.30   | 1,092.57 | 546.79   | 1,091.58 | 546.30   | 9     |
| 15 | 1,734.96 | 867.98   | 1,717.94 | 859.47   | 1,716.95 | 858.98   | I   | 996.51   | 498.76   | 979.48   | 490.25   | 978.50   | 489.75   | 8     |
| 16 | 1,834.03 | 917.52   | 1,817.00 | 909.01   | 1,816.02 | 908.51   | V   | 883.43   | 442.22   | 866.40   | 433.70   | 865.42   | 433.21   | 7     |
| 17 | 1,949.06 | 975.03   | 1,932.03 | 966.52   | 1,931.05 | 966.03   | D   | 784.36   | 392.68   | 767.33   | 384.17   | 766.35   | 383.68   | 6     |
| 18 | 2,078.10 | 1,039.55 | 2,061.07 | 1,031.04 | 2,060.09 | 1,030.55 | E   | 669.33   | 335.17   | 652.30   | 326.66   | 651.32   | 326.16   | 5     |
| 19 | 2,177.17 | 1,089.09 | 2,160.14 | 1,080.57 | 2,159.16 | 1,080.08 | V   | 540.29   | 270.65   | 523.26   | 262.13   | 522.28   | 261.64   | 4     |
| 20 | 2,314.23 | 1,157.62 | 2,297.20 | 1,149.10 | 2,296.22 | 1,148.61 | H   | 441.22   | 221.11   | 424.19   | 212.60   | 423.21   | 212.11   | 3     |
| 21 | 2,443.27 | 1,222.14 | 2,426.24 | 1,213.63 | 2,425.26 | 1,213.13 | E   | 304.16   | 152.58   | 287.13   | 144.07   | 286.15   | 143.58   | 2     |



Query 96192 Hit 1

MS/MS Fragmentation of **LAASEAATAISHQAIQILGGMGYVTEMPAER**

Found in **sp|P16219|ACADS\_HUMAN**, Short-chain specific acyl-CoA dehydrogenase

Match to Query 96192: 3329.687from(833.429,4+)

Title: 1178: Sum of 2 scans in range 2596 (rt=67.8367, f=4, i=791) to 2597 (rt=67.8621, f=4, i=792)

[D:\lab212\membrane\GraceJoyce\iTRAQ\_28\_1\_327.raw]

Data File:Submitted from 20120508-1(merge) by Mascot Daemon on JOYCE-VAIO

Monoisotopic mass of neutral peptide Mr(calc): 3329.687

Variable modifications:

Ions Score: 56.88 Expect: 0.002

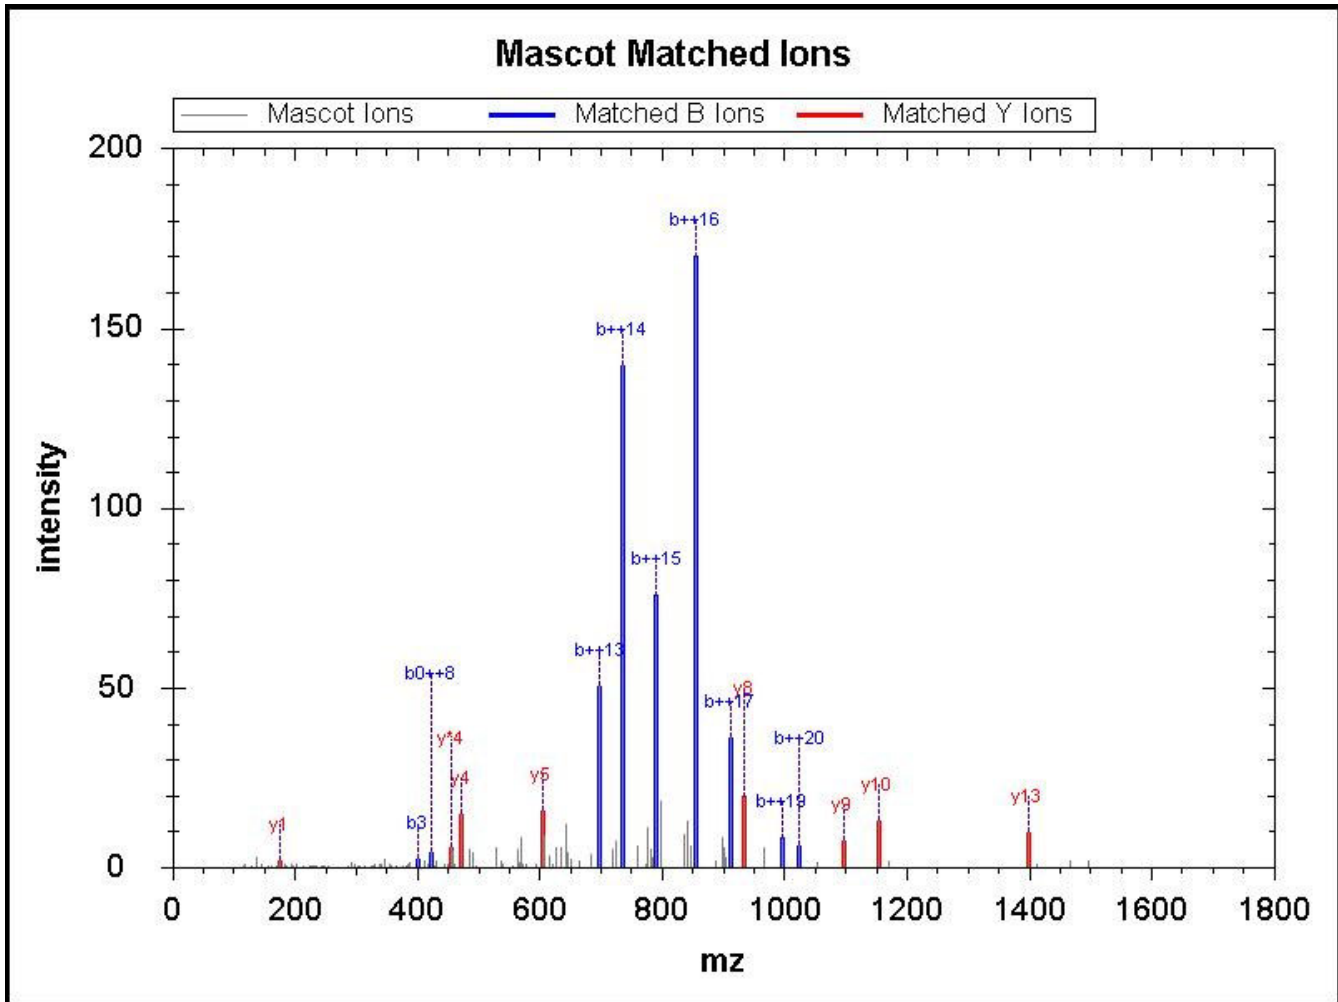

| No | b        | b++    | b*       | b*++   | b0       | b0++   | Seq | y        | y++      | y*       | y*++     | y0       | y0++     | RevNo |
|----|----------|--------|----------|--------|----------|--------|-----|----------|----------|----------|----------|----------|----------|-------|
| 1  | 258.19   | 129.60 |          |        |          |        | L   |          |          |          |          |          |          | 31    |
| 2  | 329.23   | 165.12 |          |        |          |        | A   | 3,073.51 | 1,537.26 | 3,056.48 | 1,528.74 | 3,055.50 | 1,528.25 | 30    |
| 3  | 400.27   | 200.64 |          |        |          |        | A   | 3,002.47 | 1,501.74 | 2,985.44 | 1,493.23 | 2,984.46 | 1,492.73 | 29    |
| 4  | 487.30   | 244.15 |          |        | 469.29   | 235.15 | S   | 2,931.43 | 1,466.22 | 2,914.41 | 1,457.71 | 2,913.42 | 1,457.22 | 28    |
| 5  | 616.34   | 308.67 |          |        | 598.33   | 299.67 | E   | 2,844.40 | 1,422.70 | 2,827.38 | 1,414.19 | 2,826.39 | 1,413.70 | 27    |
| 6  | 687.38   | 344.19 |          |        | 669.37   | 335.19 | A   | 2,715.36 | 1,358.18 | 2,698.33 | 1,349.67 | 2,697.35 | 1,349.18 | 26    |
| 7  | 758.42   | 379.71 |          |        | 740.41   | 370.71 | A   | 2,644.32 | 1,322.66 | 2,627.30 | 1,314.15 | 2,626.31 | 1,313.66 | 25    |
| 8  | 859.46   | 430.24 |          |        | 841.45   | 421.23 | T   | 2,573.29 | 1,287.15 | 2,556.26 | 1,278.63 | 2,555.27 | 1,278.14 | 24    |
| 9  | 930.50   | 465.75 |          |        | 912.49   | 456.75 | A   | 2,472.24 | 1,236.62 | 2,455.21 | 1,228.11 | 2,454.23 | 1,227.62 | 23    |
| 10 | 1,043.59 | 522.30 |          |        | 1,025.57 | 513.29 | I   | 2,401.20 | 1,201.10 | 2,384.17 | 1,192.59 | 2,383.19 | 1,192.10 | 22    |
| 11 | 1,130.62 | 565.81 |          |        | 1,112.61 | 556.81 | S   | 2,288.12 | 1,144.56 | 2,271.09 | 1,136.05 | 2,270.11 | 1,135.56 | 21    |
| 12 | 1,267.68 | 634.34 |          |        | 1,249.67 | 625.34 | H   | 2,201.08 | 1,101.05 | 2,184.06 | 1,092.53 | 2,183.07 | 1,092.04 | 20    |
| 13 | 1,395.73 | 698.37 | 1,378.71 | 689.86 | 1,377.72 | 689.37 | Q   | 2,064.03 | 1,032.52 | 2,047.00 | 1,024.00 | 2,046.02 | 1,023.51 | 19    |
| 14 | 1,466.77 | 733.89 | 1,449.75 | 725.38 | 1,448.76 | 724.88 | A   | 1,935.97 | 968.49   | 1,918.94 | 959.97   | 1,917.96 | 959.48   | 18    |
| 15 | 1,579.86 | 790.43 | 1,562.83 | 781.92 | 1,561.85 | 781.43 | I   | 1,864.93 | 932.97   | 1,847.90 | 924.46   | 1,846.92 | 923.96   | 17    |

|    |          |          |          |          |          |          |   |          |        |          |        |          |        |    |
|----|----------|----------|----------|----------|----------|----------|---|----------|--------|----------|--------|----------|--------|----|
| 16 | 1,707.91 | 854.46   | 1,690.89 | 845.95   | 1,689.90 | 845.46   | Q | 1,751.85 | 876.43 | 1,734.82 | 867.91 | 1,733.84 | 867.42 | 16 |
| 17 | 1,821.00 | 911.00   | 1,803.97 | 902.49   | 1,802.99 | 902.00   | I | 1,623.79 | 812.40 | 1,606.76 | 803.88 | 1,605.78 | 803.39 | 15 |
| 18 | 1,934.08 | 967.55   | 1,917.06 | 959.03   | 1,916.07 | 958.54   | L | 1,510.70 | 755.86 | 1,493.68 | 747.34 | 1,492.69 | 746.85 | 14 |
| 19 | 1,991.10 | 996.06   | 1,974.08 | 987.54   | 1,973.09 | 987.05   | G | 1,397.62 | 699.31 | 1,380.59 | 690.80 | 1,379.61 | 690.31 | 13 |
| 20 | 2,048.13 | 1,024.57 | 2,031.10 | 1,016.05 | 2,030.12 | 1,015.56 | G | 1,340.60 | 670.80 | 1,323.57 | 662.29 | 1,322.59 | 661.80 | 12 |
| 21 | 2,179.17 | 1,090.09 | 2,162.14 | 1,081.57 | 2,161.16 | 1,081.08 | M | 1,283.58 | 642.29 | 1,266.55 | 633.78 | 1,265.57 | 633.29 | 11 |
| 22 | 2,236.19 | 1,118.60 | 2,219.16 | 1,110.08 | 2,218.18 | 1,109.59 | G | 1,152.54 | 576.77 | 1,135.51 | 568.26 | 1,134.52 | 567.77 | 10 |
| 23 | 2,399.25 | 1,200.13 | 2,382.22 | 1,191.62 | 2,381.24 | 1,191.12 | Y | 1,095.51 | 548.26 | 1,078.49 | 539.75 | 1,077.50 | 539.26 | 9  |
| 24 | 2,498.32 | 1,249.66 | 2,481.29 | 1,241.15 | 2,480.31 | 1,240.66 | V | 932.45   | 466.73 | 915.42   | 458.22 | 914.44   | 457.72 | 8  |
| 25 | 2,599.37 | 1,300.19 | 2,582.34 | 1,291.67 | 2,581.36 | 1,291.18 | T | 833.38   | 417.19 | 816.36   | 408.68 | 815.37   | 408.19 | 7  |
| 26 | 2,728.41 | 1,364.71 | 2,711.38 | 1,356.20 | 2,710.40 | 1,355.70 | E | 732.33   | 366.67 | 715.31   | 358.16 | 714.32   | 357.67 | 6  |
| 27 | 2,859.45 | 1,430.23 | 2,842.42 | 1,421.72 | 2,841.44 | 1,421.22 | M | 603.29   | 302.15 | 586.27   | 293.64 | 585.28   | 293.14 | 5  |
| 28 | 2,956.50 | 1,478.76 | 2,939.48 | 1,470.24 | 2,938.49 | 1,469.75 | P | 472.25   | 236.63 | 455.22   | 228.12 | 454.24   | 227.62 | 4  |
| 29 | 3,027.54 | 1,514.27 | 3,010.51 | 1,505.76 | 3,009.53 | 1,505.27 | A | 375.20   | 188.10 | 358.17   | 179.59 | 357.19   | 179.10 | 3  |
| 30 | 3,156.58 | 1,578.79 | 3,139.56 | 1,570.28 | 3,138.57 | 1,569.79 | E | 304.16   | 152.58 | 287.13   | 144.07 | 286.15   | 143.58 | 2  |
| 31 |          |          |          |          |          |          | R | 175.12   | 88.06  | 158.09   | 79.55  |          |        | 1  |

Query 70984 Hit 1

MS/MS Fragmentation of **QLDNILAAVHDVLNESSK**

Found in **sp|Q96Q15|SMG1\_HUMAN**, Serine/threonine-protein kinase SMG1 OS=Homo sapiens GN=SMG1 PE=1 SV=3

Match to Query 70984: 2253.214from(752.0787,3+)

Title: 1109: Sum of 2 scans in range 2425 (rt=64.0622, f=4, i=731) to 2426 (rt=64.0877, f=4, i=732)

[D:\lab212\membrane\Grace\Joyce\iTRAQ\_37\_2.raw]

Data File:Submitted from 20120508-1(merge) by Mascot Daemon on JOYCE-VAIO

Monoisotopic mass of neutral peptide Mr(calc): 2253.214

Variable modifications:

K18 iTRAQ4plex (K)

Ions Score: 56.88 Expect: 0.002

### Mascot Matched Ions

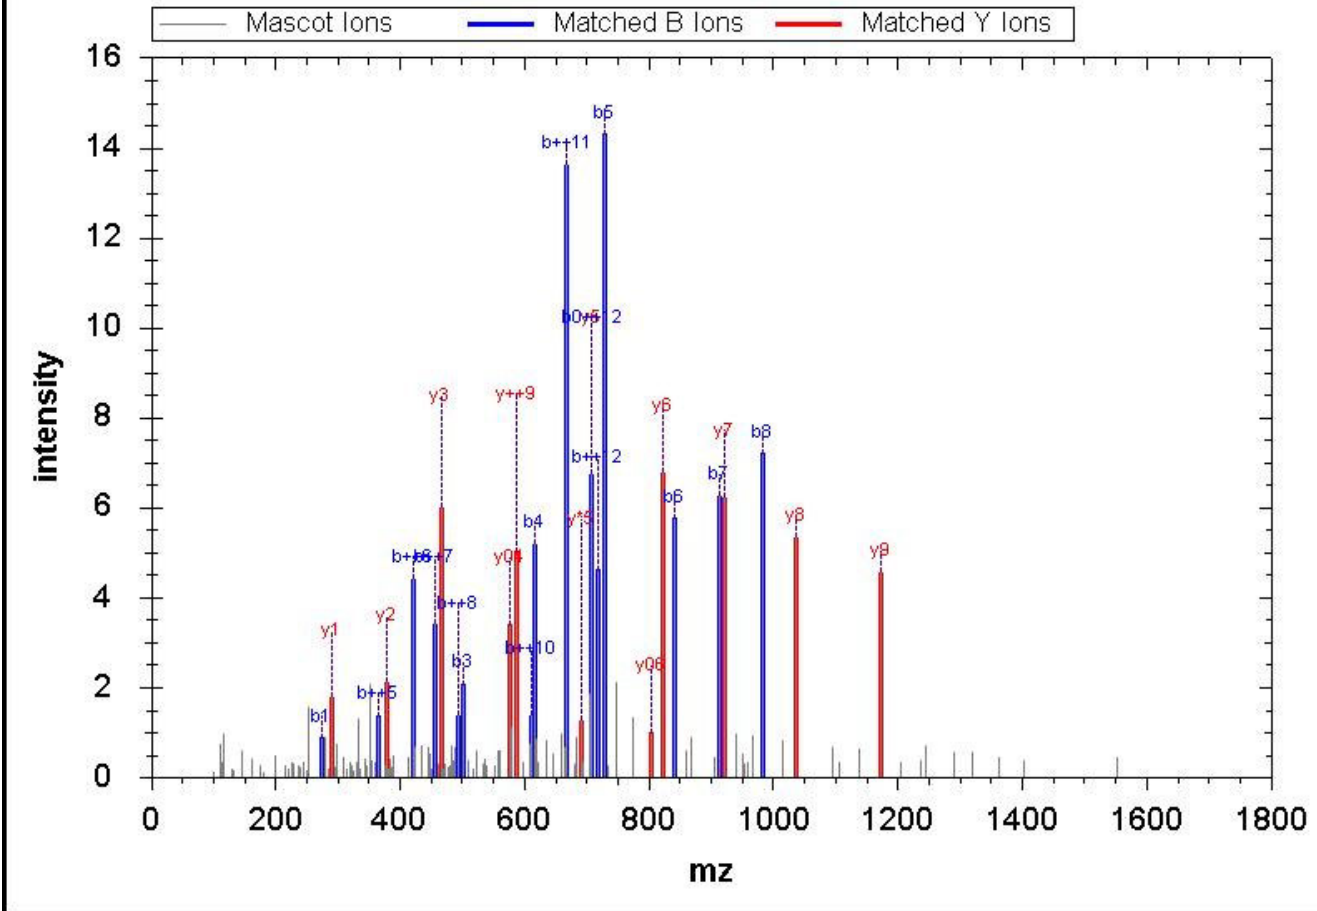

| No | b        | b++    | b*       | b*++   | b0       | b0++   | Seq | y        | y++    | y*       | y*++   | y0       | y0++   | RevNo |
|----|----------|--------|----------|--------|----------|--------|-----|----------|--------|----------|--------|----------|--------|-------|
| 1  | 273.17   | 137.09 | 256.14   | 128.57 |          |        | Q   |          |        |          |        |          |        | 18    |
| 2  | 386.25   | 193.63 | 369.23   | 185.12 |          |        | L   | 1,982.07 | 991.54 | 1,965.04 | 983.02 | 1,964.06 | 982.53 | 17    |
| 3  | 501.28   | 251.14 | 484.25   | 242.63 | 483.27   | 242.14 | D   | 1,868.98 | 935.00 | 1,851.96 | 926.48 | 1,850.97 | 925.99 | 16    |
| 4  | 615.32   | 308.16 | 598.30   | 299.65 | 597.31   | 299.16 | N   | 1,753.96 | 877.48 | 1,736.93 | 868.97 | 1,735.95 | 868.48 | 15    |
| 5  | 728.41   | 364.71 | 711.38   | 356.19 | 710.40   | 355.70 | I   | 1,639.91 | 820.46 | 1,622.89 | 811.95 | 1,621.90 | 811.46 | 14    |
| 6  | 841.49   | 421.25 | 824.46   | 412.74 | 823.48   | 412.24 | L   | 1,526.83 | 763.92 | 1,509.80 | 755.41 | 1,508.82 | 754.91 | 13    |
| 7  | 912.53   | 456.77 | 895.50   | 448.25 | 894.52   | 447.76 | A   | 1,413.75 | 707.38 | 1,396.72 | 698.86 | 1,395.73 | 698.37 | 12    |
| 8  | 983.56   | 492.29 | 966.54   | 483.77 | 965.55   | 483.28 | A   | 1,342.71 | 671.86 | 1,325.68 | 663.34 | 1,324.70 | 662.85 | 11    |
| 9  | 1,082.63 | 541.82 | 1,065.61 | 533.31 | 1,064.62 | 532.81 | V   | 1,271.67 | 636.34 | 1,254.64 | 627.83 | 1,253.66 | 627.33 | 10    |
| 10 | 1,219.69 | 610.35 | 1,202.67 | 601.84 | 1,201.68 | 601.34 | H   | 1,172.60 | 586.81 | 1,155.58 | 578.29 | 1,154.59 | 577.80 | 9     |
| 11 | 1,334.72 | 667.86 | 1,317.69 | 659.35 | 1,316.71 | 658.86 | D   | 1,035.54 | 518.28 | 1,018.52 | 509.76 | 1,017.53 | 509.27 | 8     |
| 12 | 1,433.79 | 717.40 | 1,416.76 | 708.88 | 1,415.78 | 708.39 | V   | 920.52   | 460.76 | 903.49   | 452.25 | 902.51   | 451.76 | 7     |
| 13 | 1,546.87 | 773.94 | 1,529.84 | 765.43 | 1,528.86 | 764.93 | L   | 821.45   | 411.23 | 804.42   | 402.71 | 803.44   | 402.22 | 6     |
| 14 | 1,660.91 | 830.96 | 1,643.89 | 822.45 | 1,642.90 | 821.96 | N   | 708.36   | 354.69 | 691.34   | 346.17 | 690.35   | 345.68 | 5     |
| 15 | 1,789.96 | 895.48 | 1,772.93 | 886.97 | 1,771.95 | 886.48 | E   | 594.32   | 297.66 | 577.29   | 289.15 | 576.31   | 288.66 | 4     |
| 16 | 1,876.99 | 939.00 | 1,859.96 | 930.48 | 1,858.98 | 929.99 | S   | 465.28   | 233.14 | 448.25   | 224.63 | 447.27   | 224.14 | 3     |
| 17 | 1,964.02 | 982.51 | 1,946.99 | 974.00 | 1,946.01 | 973.51 | S   | 378.25   | 189.63 | 361.22   | 181.11 | 360.24   | 180.62 | 2     |
| 18 |          |        |          |        |          |        | K   | 291.21   | 146.11 | 274.19   | 137.60 |          |        | 1     |

Query 44604 Hit 1

MS/MS Fragmentation of **LGWGSQWDVLLPK**

Found in **sp|Q99575|POP1\_HUMAN**, Ribonucleases P/MRP protein subunit POP1 OS=Homo sapiens GN=POP1 PE=1 SV=2  
Match to Query 44604: 1714.966from(858.4901,2+)

Title: 986: Sum of 2 scans in range 2253 (rt=59.7039, f=4, i=655) to 2254 (rt=59.7294, f=4, i=656)



[D:\lab212\membrane\Grace\Joyce\iTRAQ\_29\_1.raw]

Data File: Submitted from 20120508-1(merge) by Mascot Daemon on JOYCE-VAIO

Monoisotopic mass of neutral peptide Mr(calc): 1714.966

Variable modifications:

K13 iTRAQ4plex (K)

Ions Score: 56.4 Expect: 0.002

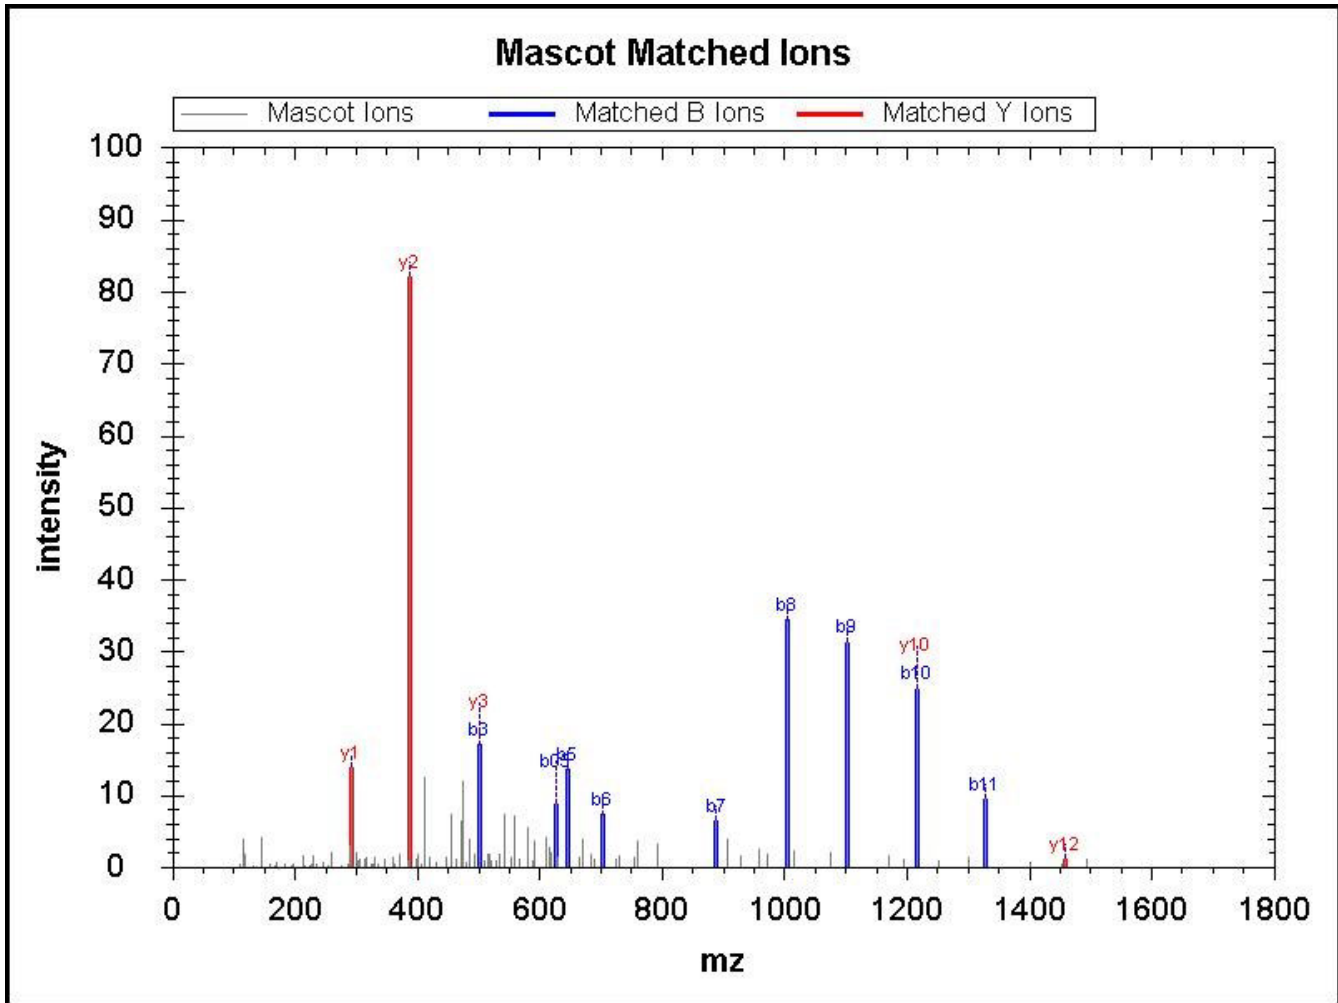

| No | b        | b++    | b0       | b0++   | Seq | y        | y++    | y*       | y*++   | y0       | y0++   | RevNo |
|----|----------|--------|----------|--------|-----|----------|--------|----------|--------|----------|--------|-------|
| 1  | 258.19   | 129.60 |          |        | L   |          |        |          |        |          |        | 13    |
| 2  | 315.21   | 158.11 |          |        | G   | 1,458.79 | 729.90 | 1,441.76 | 721.38 | 1,440.78 | 720.89 | 12    |
| 3  | 501.29   | 251.15 |          |        | W   | 1,401.76 | 701.39 | 1,384.74 | 692.87 | 1,383.75 | 692.38 | 11    |
| 4  | 558.32   | 279.66 |          |        | G   | 1,215.69 | 608.35 | 1,198.66 | 599.83 | 1,197.67 | 599.34 | 10    |
| 5  | 645.35   | 323.18 | 627.34   | 314.17 | S   | 1,158.66 | 579.84 | 1,141.64 | 571.32 | 1,140.65 | 570.83 | 9     |
| 6  | 702.37   | 351.69 | 684.36   | 342.68 | G   | 1,071.63 | 536.32 | 1,054.61 | 527.81 | 1,053.62 | 527.31 | 8     |
| 7  | 888.45   | 444.73 | 870.44   | 435.72 | W   | 1,014.61 | 507.81 | 997.58   | 499.30 | 996.60   | 498.80 | 7     |
| 8  | 1,003.48 | 502.24 | 985.46   | 493.24 | D   | 828.53   | 414.77 | 811.50   | 406.26 | 810.52   | 405.76 | 6     |
| 9  | 1,102.54 | 551.78 | 1,084.53 | 542.77 | V   | 713.50   | 357.26 | 696.48   | 348.74 |          |        | 5     |
| 10 | 1,215.63 | 608.32 | 1,197.62 | 599.31 | L   | 614.44   | 307.72 | 597.41   | 299.21 |          |        | 4     |
| 11 | 1,328.71 | 664.86 | 1,310.70 | 655.85 | L   | 501.35   | 251.18 | 484.33   | 242.67 |          |        | 3     |
| 12 | 1,425.76 | 713.39 | 1,407.75 | 704.38 | P   | 388.27   | 194.64 | 371.24   | 186.12 |          |        | 2     |
| 13 |          |        |          |        | K   | 291.21   | 146.11 | 274.19   | 137.60 |          |        | 1     |

Query 56950 Hit 1

MS/MS Fragmentation of **LVISHEEELIPLHK**

Found in [sp|O14646|CHD1\\_HUMAN](#), Chromodomain-helicase-DNA-binding protein 1 OS=Homo sapiens GN=CHD1 PE=1 SV=2

Match to Query 56950: 1944.131from(649.051,3+)

Title: 612: Scan 1373 (rt=40.5718, f=2, i=219) [D:\lab212\membrane\Grace\Joyce\iTRAQ\_54\_2.raw]

Data File:Submitted from 20120508-1(merge) by Mascot Daemon on JOYCE-VAIO  
 Monoisotopic mass of neutral peptide Mr(calc): 1944.131  
 Variable modifications:  
 K14 :iTRAQ4plex (K)  
 Ions Score: 56.36 Expect: 0.001

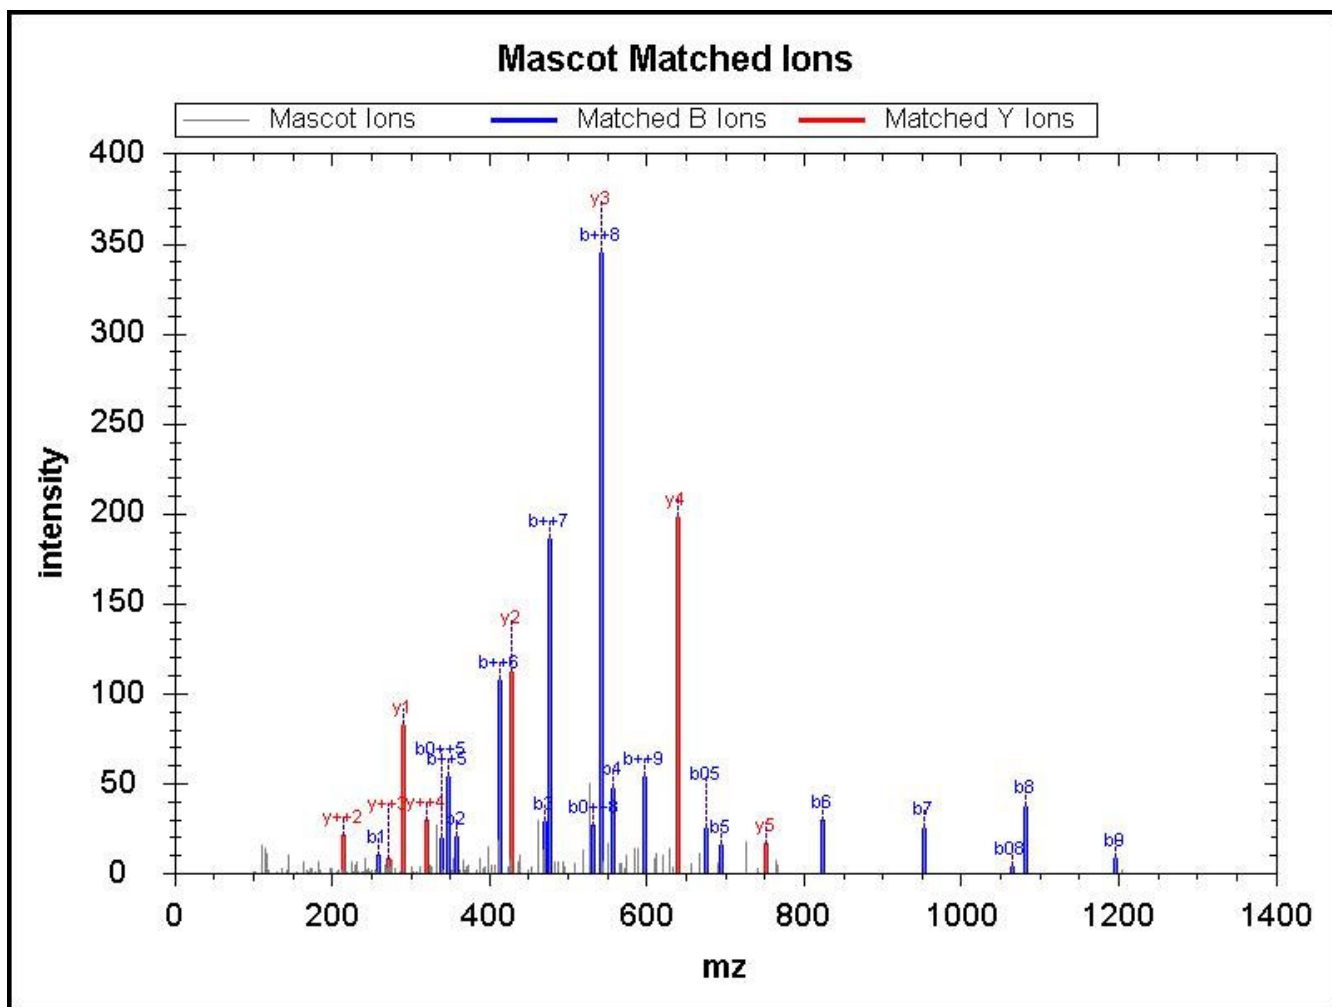

| No | b        | b++    | b0       | b0++   | Seq | y        | y++    | y*       | y*++   | y0       | y0++   | RevNo |
|----|----------|--------|----------|--------|-----|----------|--------|----------|--------|----------|--------|-------|
| 1  | 258.19   | 129.60 |          |        | L   |          |        |          |        |          |        | 14    |
| 2  | 357.26   | 179.13 |          |        | V   | 1,687.95 | 844.48 | 1,670.92 | 835.97 | 1,669.94 | 835.47 | 13    |
| 3  | 470.35   | 235.68 |          |        | I   | 1,588.88 | 794.94 | 1,571.85 | 786.43 | 1,570.87 | 785.94 | 12    |
| 4  | 557.38   | 279.19 | 539.37   | 270.19 | S   | 1,475.80 | 738.40 | 1,458.77 | 729.89 | 1,457.79 | 729.40 | 11    |
| 5  | 694.44   | 347.72 | 676.43   | 338.72 | H   | 1,388.77 | 694.89 | 1,371.74 | 686.37 | 1,370.75 | 685.88 | 10    |
| 6  | 823.48   | 412.24 | 805.47   | 403.24 | E   | 1,251.71 | 626.36 | 1,234.68 | 617.84 | 1,233.70 | 617.35 | 9     |
| 7  | 952.52   | 476.76 | 934.51   | 467.76 | E   | 1,122.66 | 561.84 | 1,105.64 | 553.32 | 1,104.65 | 552.83 | 8     |
| 8  | 1,081.56 | 541.29 | 1,063.55 | 532.28 | E   | 993.62   | 497.31 | 976.59   | 488.80 | 975.61   | 488.31 | 7     |
| 9  | 1,194.65 | 597.83 | 1,176.64 | 588.82 | L   | 864.58   | 432.79 | 847.55   | 424.28 |          |        | 6     |
| 10 | 1,307.73 | 654.37 | 1,289.72 | 645.36 | I   | 751.49   | 376.25 | 734.47   | 367.74 |          |        | 5     |
| 11 | 1,404.79 | 702.90 | 1,386.78 | 693.89 | P   | 638.41   | 319.71 | 621.38   | 311.20 |          |        | 4     |
| 12 | 1,517.87 | 759.44 | 1,499.86 | 750.43 | L   | 541.36   | 271.18 | 524.33   | 262.67 |          |        | 3     |
| 13 | 1,654.93 | 827.97 | 1,636.92 | 818.96 | H   | 428.27   | 214.64 | 411.25   | 206.13 |          |        | 2     |
| 14 |          |        |          |        | K   | 291.21   | 146.11 | 274.19   | 137.60 |          |        | 1     |

Query 38852 Hit 1

MS/MS Fragmentation of **KDVLETFTVK**

Found in **sp|P21926|CD9\_HUMAN**, CD9 antigen OS=Homo sapiens GN=CD9 PE=1 SV=4

Match to Query 38852: 1610.965from(537.9957,3+)

Title: 563: Scan 1257 (rt=37.9892, f=3, i=193) [D:\lab212\membrane\Grace\Joyce\iTRAQ\_47\_1.raw]  
 Data File: Submitted from 20120508-1(merge) by Mascot Daemon on JOYCE-VAIO  
 Monoisotopic mass of neutral peptide Mr(calc): 1610.965  
 Variable modifications:  
 K1 :iTRAQ4plex (K)  
 K10 :iTRAQ4plex (K)  
 Ions Score: 56.19 Expect: 0.001

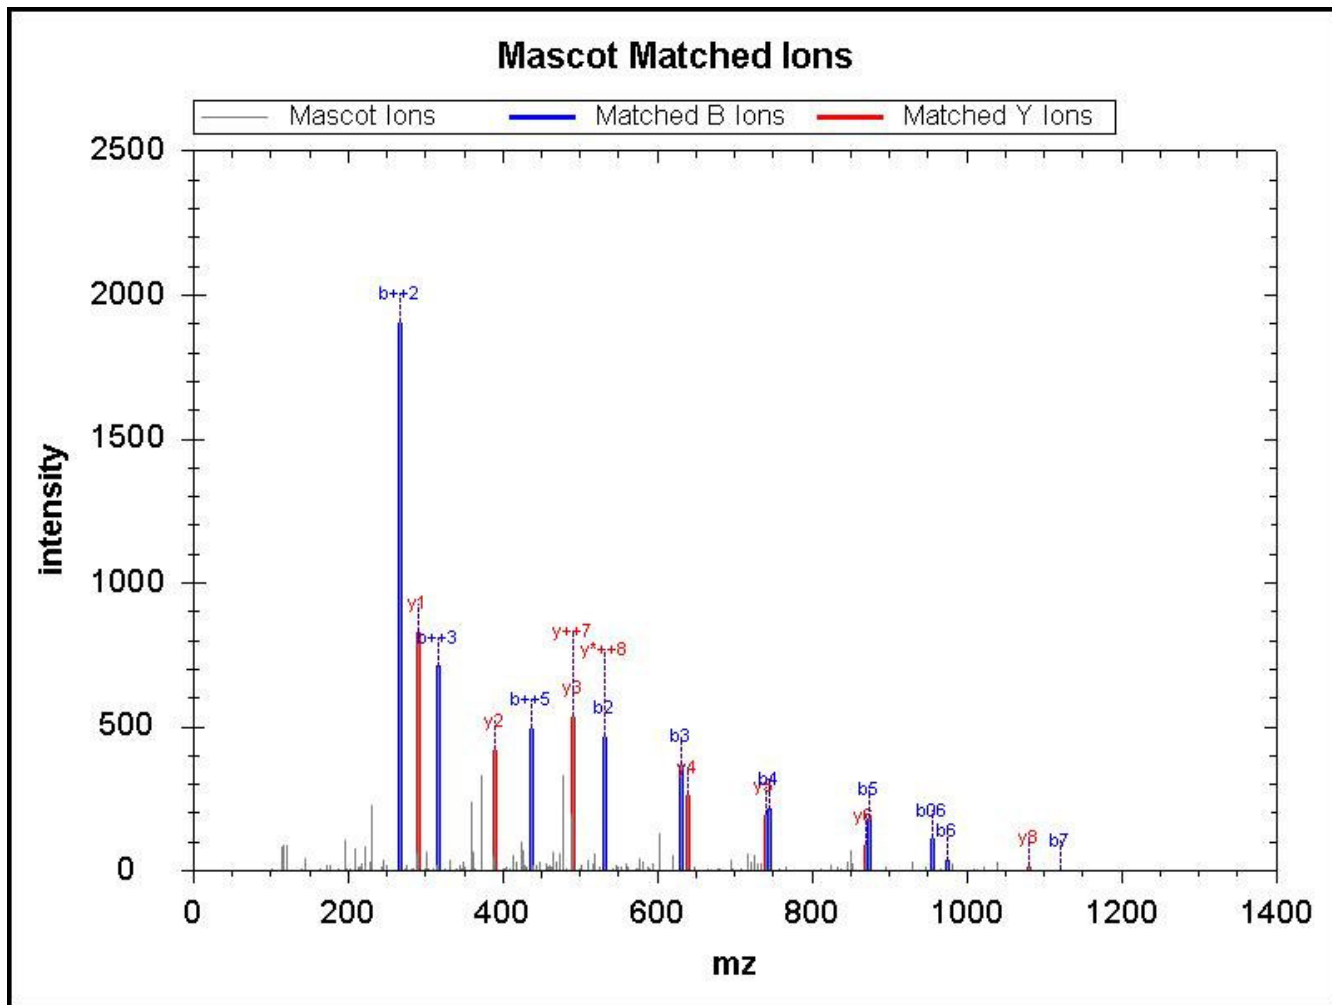

| No | b        | b++    | b*       | b*++   | b0       | b0++   | Seq | y        | y++    | y*       | y*++   | y0       | y0++   | RevNo |
|----|----------|--------|----------|--------|----------|--------|-----|----------|--------|----------|--------|----------|--------|-------|
| 1  | 417.31   | 209.16 | 400.28   | 200.64 |          |        | K   |          |        |          |        |          |        | 10    |
| 2  | 532.33   | 266.67 | 515.31   | 258.16 | 514.32   | 257.66 | D   | 1,195.67 | 598.34 | 1,178.64 | 589.82 | 1,177.66 | 589.33 | 9     |
| 3  | 631.40   | 316.20 | 614.38   | 307.69 | 613.39   | 307.20 | V   | 1,080.64 | 540.82 | 1,063.62 | 532.31 | 1,062.63 | 531.82 | 8     |
| 4  | 744.49   | 372.75 | 727.46   | 364.23 | 726.48   | 363.74 | L   | 981.57   | 491.29 | 964.55   | 482.78 | 963.56   | 482.29 | 7     |
| 5  | 873.53   | 437.27 | 856.50   | 428.75 | 855.52   | 428.26 | E   | 868.49   | 434.75 | 851.46   | 426.24 | 850.48   | 425.74 | 6     |
| 6  | 974.58   | 487.79 | 957.55   | 479.28 | 956.57   | 478.79 | T   | 739.45   | 370.23 | 722.42   | 361.71 | 721.44   | 361.22 | 5     |
| 7  | 1,121.64 | 561.33 | 1,104.62 | 552.81 | 1,103.63 | 552.32 | F   | 638.40   | 319.70 | 621.37   | 311.19 | 620.39   | 310.70 | 4     |
| 8  | 1,222.69 | 611.85 | 1,205.67 | 603.34 | 1,204.68 | 602.84 | T   | 491.33   | 246.17 | 474.30   | 237.66 | 473.32   | 237.16 | 3     |
| 9  | 1,321.76 | 661.38 | 1,304.73 | 652.87 | 1,303.75 | 652.38 | V   | 390.28   | 195.65 | 373.26   | 187.13 |          |        | 2     |
| 10 |          |        |          |        |          |        | K   | 291.21   | 146.11 | 274.19   | 137.60 |          |        | 1     |

Query 72045 Hit 1

MS/MS Fragmentation of **LASGEITQDDFLVVDHQR**

Found in **sp|O94913|PCF11\_HUMAN**, Pre-mRNA cleavage complex 2 protein Pcf1 OS=Homo sapiens GN=PCF11 PE=1 SV=3  
 Match to Query 72045: 2283.224from(762.0819,3+)

Title: 849: Sum of 3 scans in range 1902 (rt=52.2638, f=2, i=297) to 1905 (rt=52.34, f=4, i=572)

[D:\lab212\membrane\Grace\Joyce\iTRAQ\_32\_2.raw]

Data File: Submitted from 20120508-1(merge) by Mascot Daemon on JOYCE-VAIO

Monoisotopic mass of neutral peptide Mr(calc): 2283.224

Variable modifications:  
 Ions Score: 56.09 Expect: 0.002

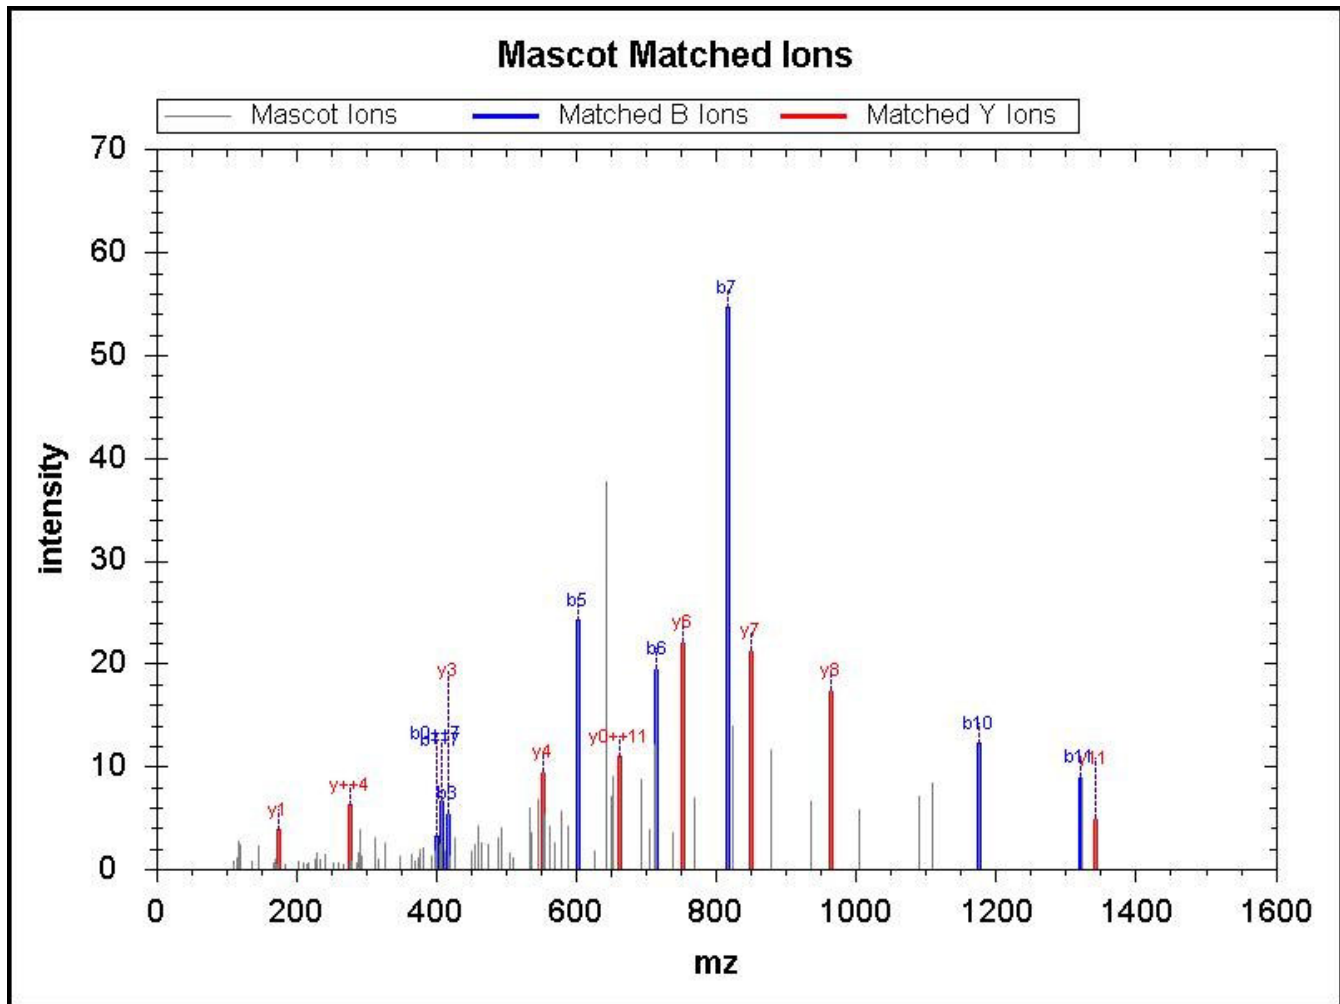

| No | b        | b++      | b*       | b***     | b0       | b0++     | Seq | y        | y++      | y*       | y***     | y0       | y0++     | RevNo |
|----|----------|----------|----------|----------|----------|----------|-----|----------|----------|----------|----------|----------|----------|-------|
| 1  | 258.19   | 129.60   |          |          |          |          | L   |          |          |          |          |          |          | 19    |
| 2  | 329.23   | 165.12   |          |          |          |          | A   | 2,027.06 | 1,014.03 | 2,010.03 | 1,005.52 | 2,009.05 | 1,005.03 | 18    |
| 3  | 416.26   | 208.63   |          |          | 398.25   | 199.63   | S   | 1,956.02 | 978.51   | 1,938.99 | 970.00   | 1,938.01 | 969.51   | 17    |
| 4  | 473.28   | 237.15   |          |          | 455.27   | 228.14   | G   | 1,868.99 | 935.00   | 1,851.96 | 926.48   | 1,850.98 | 925.99   | 16    |
| 5  | 602.33   | 301.67   |          |          | 584.32   | 292.66   | E   | 1,811.97 | 906.49   | 1,794.94 | 897.97   | 1,793.95 | 897.48   | 15    |
| 6  | 715.41   | 358.21   |          |          | 697.40   | 349.20   | I   | 1,682.92 | 841.96   | 1,665.90 | 833.45   | 1,664.91 | 832.96   | 14    |
| 7  | 816.46   | 408.73   |          |          | 798.45   | 399.73   | T   | 1,569.84 | 785.42   | 1,552.81 | 776.91   | 1,551.83 | 776.42   | 13    |
| 8  | 944.52   | 472.76   | 927.49   | 464.25   | 926.51   | 463.76   | Q   | 1,468.79 | 734.90   | 1,451.76 | 726.39   | 1,450.78 | 725.89   | 12    |
| 9  | 1,059.54 | 530.28   | 1,042.52 | 521.76   | 1,041.53 | 521.27   | D   | 1,340.73 | 670.87   | 1,323.71 | 662.36   | 1,322.72 | 661.86   | 11    |
| 10 | 1,174.57 | 587.79   | 1,157.54 | 579.28   | 1,156.56 | 578.78   | D   | 1,225.71 | 613.36   | 1,208.68 | 604.84   | 1,207.69 | 604.35   | 10    |
| 11 | 1,321.64 | 661.32   | 1,304.61 | 652.81   | 1,303.63 | 652.32   | F   | 1,110.68 | 555.84   | 1,093.65 | 547.33   |          |          | 9     |
| 12 | 1,434.72 | 717.87   | 1,417.70 | 709.35   | 1,416.71 | 708.86   | L   | 963.61   | 482.31   | 946.58   | 473.80   |          |          | 8     |
| 13 | 1,533.79 | 767.40   | 1,516.77 | 758.89   | 1,515.78 | 758.39   | V   | 850.53   | 425.77   | 833.50   | 417.25   |          |          | 7     |
| 14 | 1,632.86 | 816.93   | 1,615.83 | 808.42   | 1,614.85 | 807.93   | V   | 751.46   | 376.23   | 734.43   | 367.72   |          |          | 6     |
| 15 | 1,731.93 | 866.47   | 1,714.90 | 857.95   | 1,713.92 | 857.46   | V   | 652.39   | 326.70   | 635.36   | 318.18   |          |          | 5     |
| 16 | 1,868.99 | 935.00   | 1,851.96 | 926.48   | 1,850.98 | 925.99   | H   | 553.32   | 277.16   | 536.29   | 268.65   |          |          | 4     |
| 17 | 1,997.05 | 999.03   | 1,980.02 | 990.51   | 1,979.04 | 990.02   | Q   | 416.26   | 208.63   | 399.24   | 200.12   |          |          | 3     |
| 18 | 2,110.13 | 1,055.57 | 2,093.10 | 1,047.06 | 2,092.12 | 1,046.56 | I   | 288.20   | 144.61   | 271.18   | 136.09   |          |          | 2     |
| 19 |          |          |          |          |          |          | R   | 175.12   | 88.06    | 158.09   | 79.55    |          |          | 1     |

MS/MS Fragmentation of **HTAAPTDPADGPV**

Found in **sp|Q04941|PLP2\_HUMAN**, Proteolipid protein 2 OS=Homo sapiens GN=PLP2 PE=1 SV=1

Match to Query 26944: 1391.685from(696.8498,2+)

Title: 202: Scan 552 (rt=21.7533, f=3, i=73) [D:\lab212\membrane\Grace\Joyce\iTRAQ\_27\_1.raw]

Data File: Submitted from 20120508-1(merge) by Mascot Daemon on JOYCE-VAIO

Monoisotopic mass of neutral peptide Mr(calc): 1391.685

Variable modifications:

Ions Score: 56 Expect: 0.002

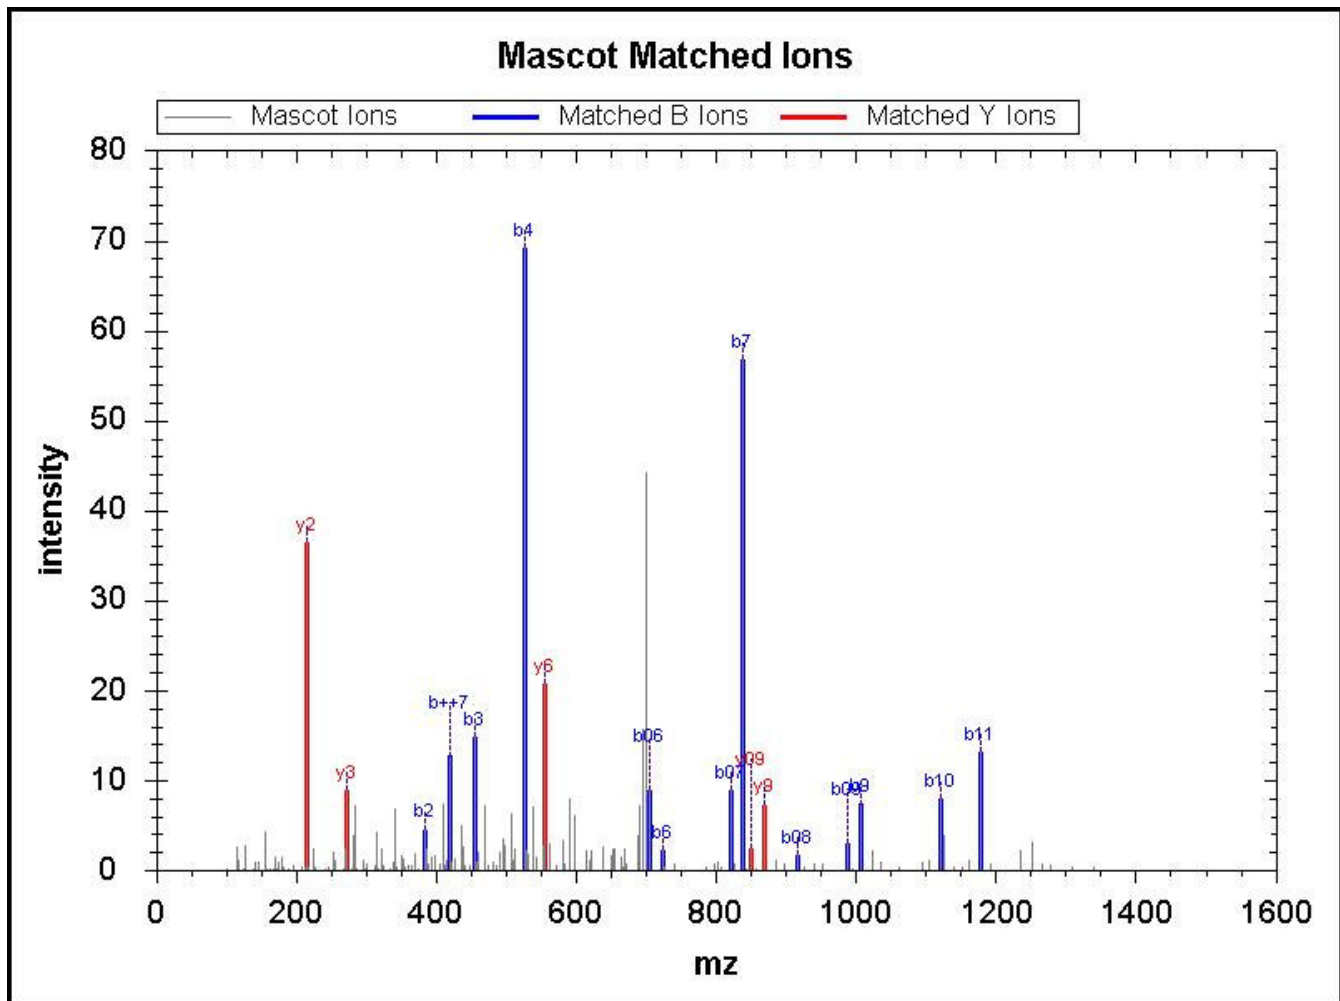

| No | b        | b++    | b0       | b0++   | Seq | y        | y++    | y0       | y0++   | RevNo |
|----|----------|--------|----------|--------|-----|----------|--------|----------|--------|-------|
| 1  | 282.17   | 141.59 |          |        | H   |          |        |          |        | 13    |
| 2  | 383.22   | 192.11 | 365.21   | 183.11 | T   | 1,111.53 | 556.27 | 1,093.52 | 547.26 | 12    |
| 3  | 454.25   | 227.63 | 436.24   | 218.62 | A   | 1,010.48 | 505.74 | 992.47   | 496.74 | 11    |
| 4  | 525.29   | 263.15 | 507.28   | 254.14 | A   | 939.44   | 470.22 | 921.43   | 461.22 | 10    |
| 5  | 622.34   | 311.68 | 604.33   | 302.67 | P   | 868.40   | 434.71 | 850.39   | 425.70 | 9     |
| 6  | 723.39   | 362.20 | 705.38   | 353.19 | T   | 771.35   | 386.18 | 753.34   | 377.17 | 8     |
| 7  | 838.42   | 419.71 | 820.41   | 410.71 | D   | 670.30   | 335.66 | 652.29   | 326.65 | 7     |
| 8  | 935.47   | 468.24 | 917.46   | 459.23 | P   | 555.28   | 278.14 | 537.27   | 269.14 | 6     |
| 9  | 1,006.51 | 503.76 | 988.50   | 494.75 | A   | 458.22   | 229.62 | 440.21   | 220.61 | 5     |
| 10 | 1,121.53 | 561.27 | 1,103.52 | 552.27 | D   | 387.19   | 194.10 | 369.18   | 185.09 | 4     |
| 11 | 1,178.56 | 589.78 | 1,160.55 | 580.78 | G   | 272.16   | 136.58 |          |        | 3     |
| 12 | 1,275.61 | 638.31 | 1,257.60 | 629.30 | P   | 215.14   | 108.07 |          |        | 2     |
| 13 |          |        |          |        | V   | 118.09   | 59.55  |          |        | 1     |

Query 70699 Hit 1

MS/MS Fragmentation of **HGYNMEQALGMLFWHK**

Found in **sp|Q9UKL0|RCOR1\_HUMAN**, REST corepressor 1 OS=Homo sapiens GN=RCOR1 PE=1 SV=1

Match to Query 70699: 2249.11 from (750.7108, 3+)

Title: 1018: Sum of 2 scans in range 2179 (rt=58.7672, f=4, i=677) to 2180 (rt=58.7925, f=4, i=678)

[D:\lab212\membrane\GraceJoyce\iTRAQ\_50\_1.raw]

Data File: Submitted from 20120508-1 (merge) by Mascot Daemon on JOYCE-VAIO

Monoisotopic mass of neutral peptide Mr(calc): 2249.11

Variable modifications:

K16 iTRAQ4plex (K)

Ions Score: 55.93 Expect: 0.002

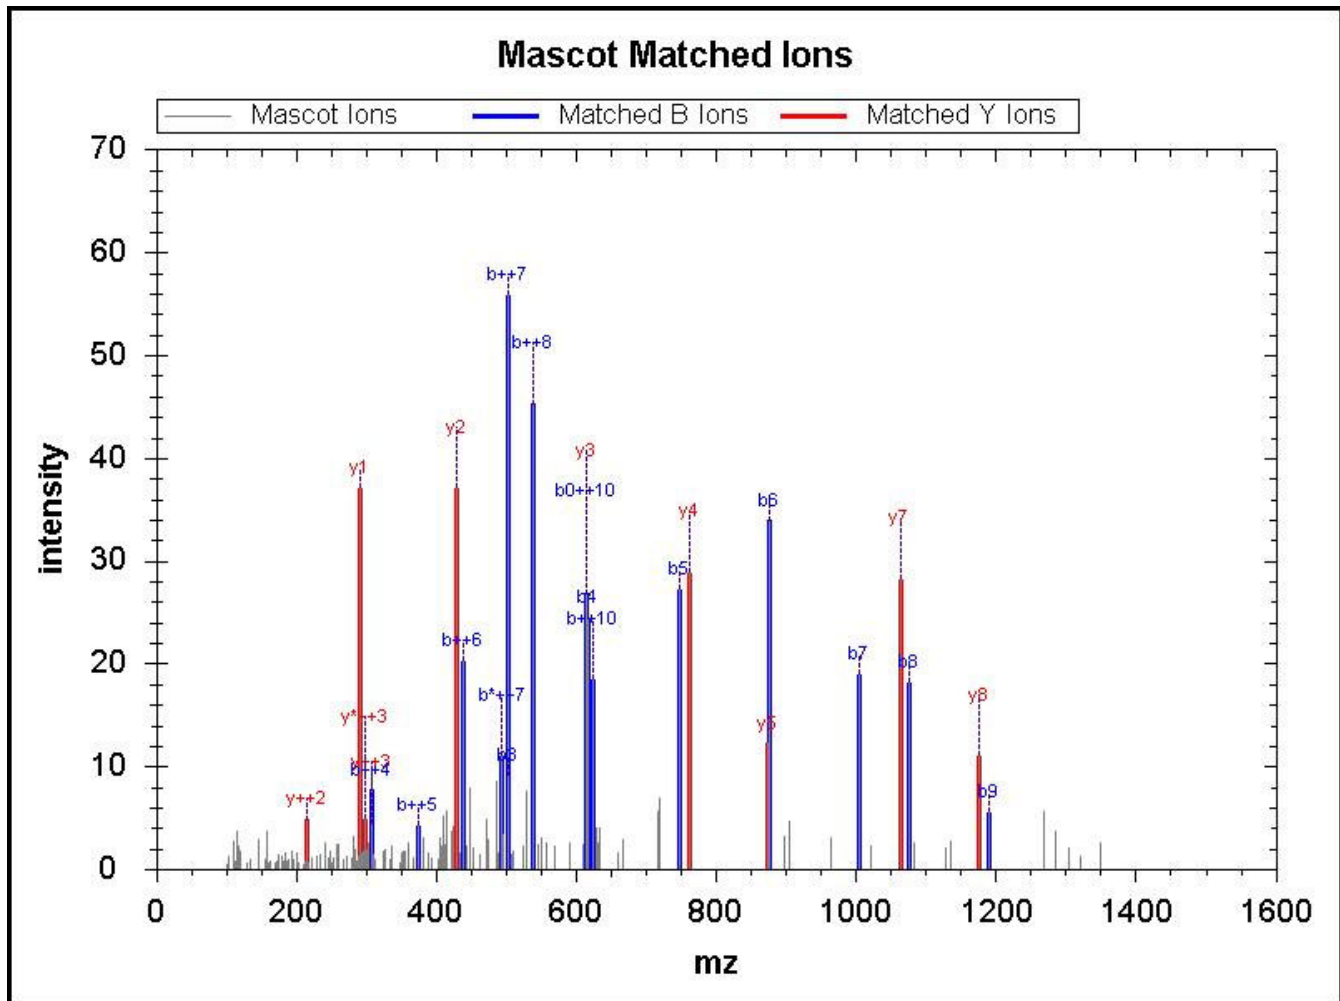

| No | b        | b++    | b*       | b*++   | b0       | b0++   | Seq | y        | y++    | y*       | y*++   | y0       | y0++   | RevNo |
|----|----------|--------|----------|--------|----------|--------|-----|----------|--------|----------|--------|----------|--------|-------|
| 1  | 282.17   | 141.59 |          |        |          |        | H   |          |        |          |        |          |        | 16    |
| 2  | 339.19   | 170.10 |          |        |          |        | G   | 1,968.96 | 984.98 | 1,951.93 | 976.47 | 1,950.95 | 975.98 | 15    |
| 3  | 502.25   | 251.63 |          |        |          |        | Y   | 1,911.94 | 956.47 | 1,894.91 | 947.96 | 1,893.93 | 947.47 | 14    |
| 4  | 616.30   | 308.65 | 599.27   | 300.14 |          |        | N   | 1,748.87 | 874.94 | 1,731.85 | 866.43 | 1,730.86 | 865.93 | 13    |
| 5  | 747.34   | 374.17 | 730.31   | 365.66 |          |        | M   | 1,634.83 | 817.92 | 1,617.80 | 809.41 | 1,616.82 | 808.91 | 12    |
| 6  | 876.38   | 438.69 | 859.35   | 430.18 | 858.37   | 429.69 | E   | 1,503.79 | 752.40 | 1,486.76 | 743.89 | 1,485.78 | 743.39 | 11    |
| 7  | 1,004.44 | 502.72 | 987.41   | 494.21 | 986.43   | 493.72 | Q   | 1,374.75 | 687.88 | 1,357.72 | 679.36 |          |        | 10    |
| 8  | 1,075.47 | 538.24 | 1,058.45 | 529.73 | 1,057.46 | 529.24 | A   | 1,246.69 | 623.85 | 1,229.66 | 615.33 |          |        | 9     |
| 9  | 1,188.56 | 594.78 | 1,171.53 | 586.27 | 1,170.55 | 585.78 | L   | 1,175.65 | 588.33 | 1,158.63 | 579.82 |          |        | 8     |
| 10 | 1,245.58 | 623.29 | 1,228.55 | 614.78 | 1,227.57 | 614.29 | G   | 1,062.57 | 531.79 | 1,045.54 | 523.27 |          |        | 7     |
| 11 | 1,376.62 | 688.81 | 1,359.59 | 680.30 | 1,358.61 | 679.81 | M   | 1,005.55 | 503.28 | 988.52   | 494.76 |          |        | 6     |
| 12 | 1,489.71 | 745.36 | 1,472.68 | 736.84 | 1,471.69 | 736.35 | L   | 874.51   | 437.76 | 857.48   | 429.24 |          |        | 5     |
| 13 | 1,636.77 | 818.89 | 1,619.75 | 810.38 | 1,618.76 | 809.89 | F   | 761.42   | 381.21 | 744.39   | 372.70 |          |        | 4     |
| 14 | 1,822.85 | 911.93 | 1,805.83 | 903.42 | 1,804.84 | 902.92 | W   | 614.35   | 307.68 | 597.33   | 299.17 |          |        | 3     |
| 15 | 1,959.91 | 980.46 | 1,942.89 | 971.95 | 1,941.90 | 971.45 | H   | 428.27   | 214.64 | 411.25   | 206.13 |          |        | 2     |
| 16 |          |        |          |        |          |        | K   | 291.21   | 146.11 | 274.19   | 137.60 |          |        | 1     |

Query 46037 Hit 1

MS/MS Fragmentation of **KGEETEETSSSK**

Found in **sp|Q9UEE9|CFDPI\_HUMAN**, Craniofacial development protein 1 OS=Homo sapiens GN=CFDPI PE=1 SV=1

Match to Query 46037: 1742.89 from (581.9708,3+)

Title: 7: Sum of 2 scans in range 102 (rt=11.9238, f=2, i=16) to 103 (rt=11.9492, f=2, i=17)

[D:\lab212\membrane\Grace\Joyce\iTRAQ\_49\_2.raw]

Data File: Submitted from 20120508-1(merge) by Mascot Daemon on JOYCE-VAIO

Monoisotopic mass of neutral peptide Mr(calc): 1742.89

Variable modifications:

K1 :iTRAQ4plex (K)

K12 :iTRAQ4plex (K)

Ions Score: 55.82 Expect: 0.002

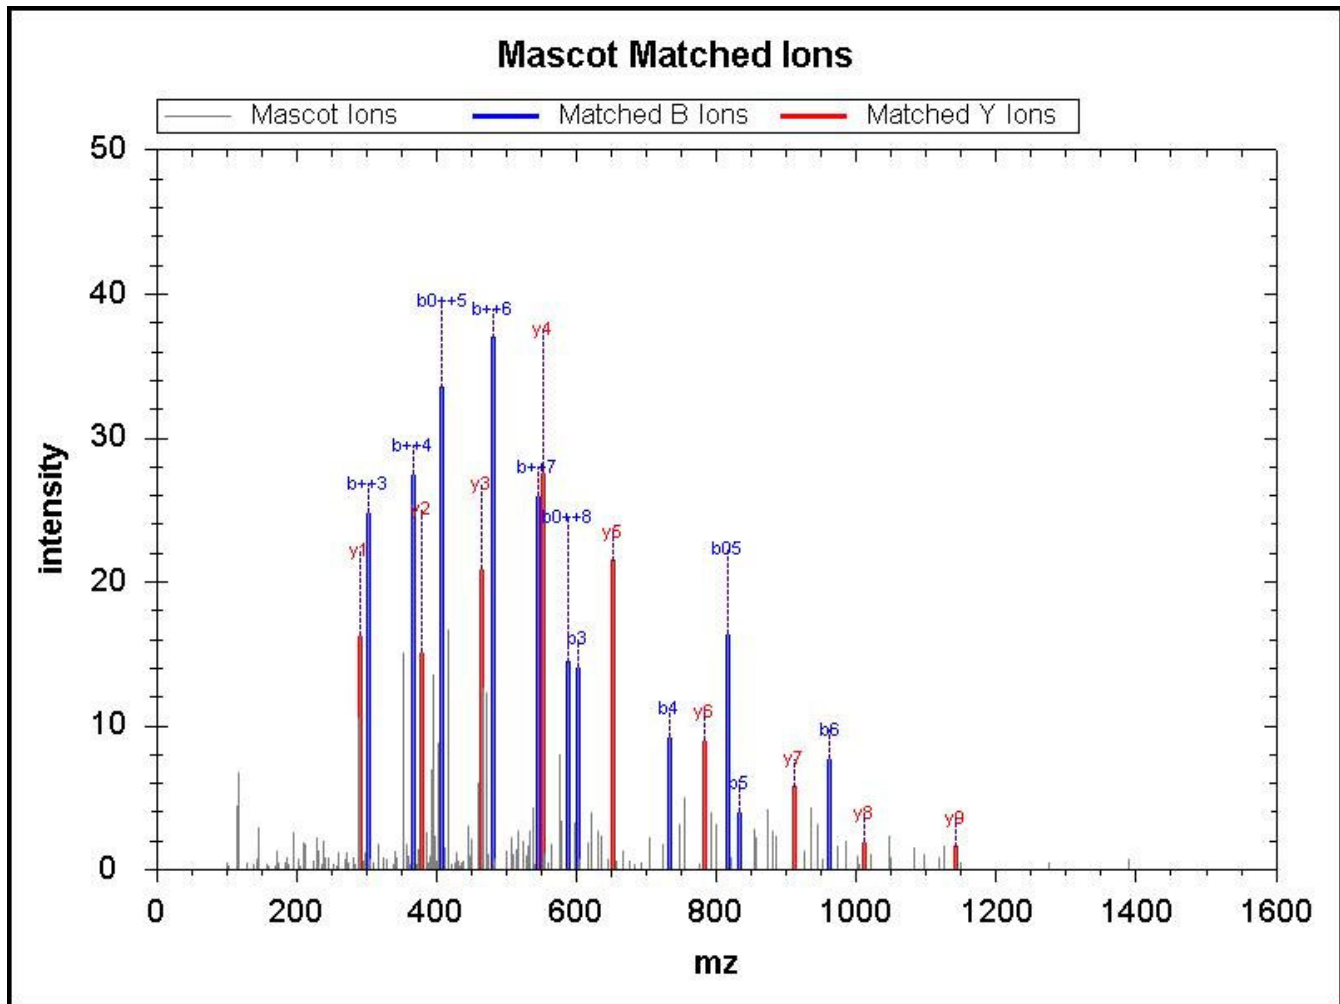

| No | b        | b++    | b*       | b*++   | b0       | b0++   | Seq | y        | y++    | y*       | y*++   | y0       | y0++   | RevNo |
|----|----------|--------|----------|--------|----------|--------|-----|----------|--------|----------|--------|----------|--------|-------|
| 1  | 417.31   | 209.16 | 400.28   | 200.64 |          |        | K   |          |        |          |        |          |        | 12    |
| 2  | 474.33   | 237.67 | 457.30   | 229.15 |          |        | G   | 1,327.60 | 664.30 | 1,310.57 | 655.79 | 1,309.59 | 655.30 | 11    |
| 3  | 603.37   | 302.19 | 586.34   | 293.68 | 585.36   | 293.18 | E   | 1,270.58 | 635.79 | 1,253.55 | 627.28 | 1,252.57 | 626.79 | 10    |
| 4  | 732.41   | 366.71 | 715.39   | 358.20 | 714.40   | 357.70 | E   | 1,141.53 | 571.27 | 1,124.51 | 562.76 | 1,123.52 | 562.27 | 9     |
| 5  | 833.46   | 417.23 | 816.43   | 408.72 | 815.45   | 408.23 | T   | 1,012.49 | 506.75 | 995.46   | 498.24 | 994.48   | 497.74 | 8     |
| 6  | 962.50   | 481.76 | 945.48   | 473.24 | 944.49   | 472.75 | E   | 911.44   | 456.23 | 894.42   | 447.71 | 893.43   | 447.22 | 7     |
| 7  | 1,091.55 | 546.28 | 1,074.52 | 537.76 | 1,073.54 | 537.27 | E   | 782.40   | 391.70 | 765.37   | 383.19 | 764.39   | 382.70 | 6     |
| 8  | 1,192.59 | 596.80 | 1,175.57 | 588.29 | 1,174.58 | 587.80 | T   | 653.36   | 327.18 | 636.33   | 318.67 | 635.35   | 318.18 | 5     |
| 9  | 1,279.63 | 640.32 | 1,262.60 | 631.80 | 1,261.61 | 631.31 | S   | 552.31   | 276.66 | 535.28   | 268.15 | 534.30   | 267.65 | 4     |
| 10 | 1,366.66 | 683.83 | 1,349.63 | 675.32 | 1,348.65 | 674.83 | S   | 465.28   | 233.14 | 448.25   | 224.63 | 447.27   | 224.14 | 3     |
| 11 | 1,453.69 | 727.35 | 1,436.66 | 718.84 | 1,435.68 | 718.34 | S   | 378.25   | 189.63 | 361.22   | 181.11 | 360.24   | 180.62 | 2     |
| 12 |          |        |          |        |          |        | K   | 291.21   | 146.11 | 274.19   | 137.60 |          |        | 1     |

Query 50363 Hit 1

MS/MS Fragmentation of **LYHILTPVPEELR**

Found in **sp|Q5SY16|NOL9\_HUMAN**, Polynucleotide 5'-hydroxyl-kinase NOL9 OS=Homo sapiens GN=NOL9 PE=1 SV=1

Match to Query 50363: 1820.034 from (607.6852, 3+)

Title: 654: Sum of 2 scans in range 1463 (rt=42.483, f=4, i=435) to 1464 (rt=42.5084, f=4, i=436)

[D:\lab212\membrane\GraceJoyce\iTRAQ\_34\_2.raw]

Data File: Submitted from 20120508-1(merge) by Mascot Daemon on JOYCE-VAIO

Monoisotopic mass of neutral peptide Mr(calc): 1820.034

Variable modifications:

Ions Score: 55.33 Expect: 0.002

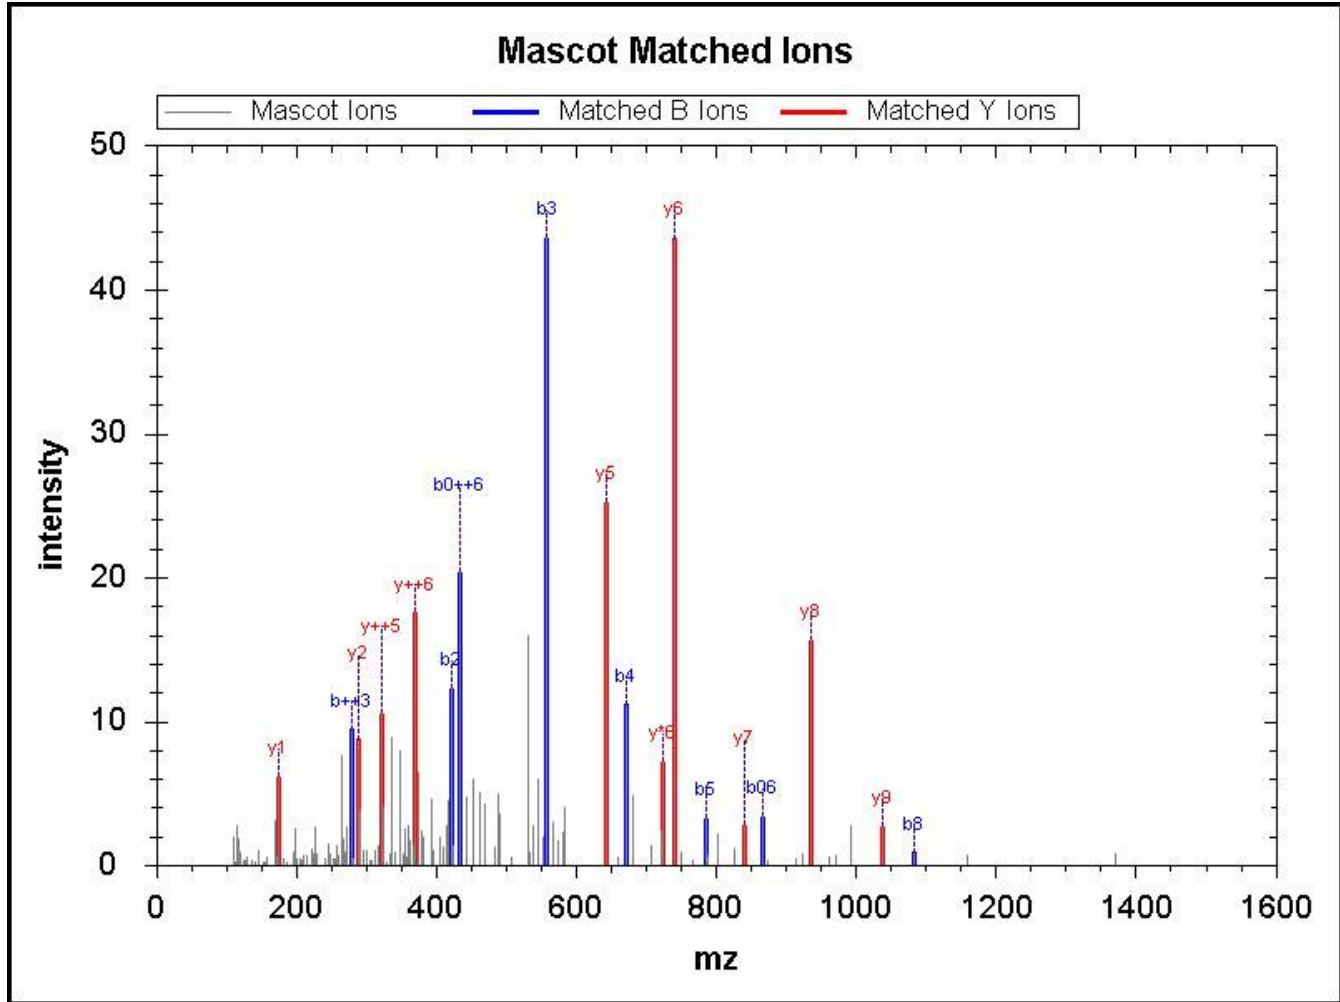

| No | b        | b++    | b0       | b0++   | Seq | y        | y++    | y*       | y*++   | y0       | y0++   | RevNo |
|----|----------|--------|----------|--------|-----|----------|--------|----------|--------|----------|--------|-------|
| 1  | 258.19   | 129.60 |          |        | L   |          |        |          |        |          |        | 14    |
| 2  | 421.26   | 211.13 |          |        | Y   | 1,563.85 | 782.43 | 1,546.83 | 773.92 | 1,545.84 | 773.42 | 13    |
| 3  | 558.32   | 279.66 |          |        | H   | 1,400.79 | 700.90 | 1,383.76 | 692.39 | 1,382.78 | 691.89 | 12    |
| 4  | 671.40   | 336.20 |          |        | I   | 1,263.73 | 632.37 | 1,246.70 | 623.86 | 1,245.72 | 623.36 | 11    |
| 5  | 784.48   | 392.75 |          |        | L   | 1,150.65 | 575.83 | 1,133.62 | 567.31 | 1,132.64 | 566.82 | 10    |
| 6  | 885.53   | 443.27 | 867.52   | 434.26 | T   | 1,037.56 | 519.28 | 1,020.54 | 510.77 | 1,019.55 | 510.28 | 9     |
| 7  | 982.58   | 491.80 | 964.57   | 482.79 | P   | 936.51   | 468.76 | 919.49   | 460.25 | 918.50   | 459.76 | 8     |
| 8  | 1,081.65 | 541.33 | 1,063.64 | 532.32 | V   | 839.46   | 420.23 | 822.44   | 411.72 | 821.45   | 411.23 | 7     |
| 9  | 1,178.71 | 589.86 | 1,160.69 | 580.85 | P   | 740.39   | 370.70 | 723.37   | 362.19 | 722.38   | 361.70 | 6     |
| 10 | 1,275.76 | 638.38 | 1,257.75 | 629.38 | P   | 643.34   | 322.17 | 626.31   | 313.66 | 625.33   | 313.17 | 5     |
| 11 | 1,404.80 | 702.90 | 1,386.79 | 693.90 | E   | 546.29   | 273.65 | 529.26   | 265.13 | 528.28   | 264.64 | 4     |
| 12 | 1,533.84 | 767.43 | 1,515.83 | 758.42 | E   | 417.25   | 209.13 | 400.22   | 200.61 | 399.24   | 200.12 | 3     |
| 13 | 1,646.93 | 823.97 | 1,628.92 | 814.96 | L   | 288.20   | 144.61 | 271.18   | 136.09 |          |        | 2     |
| 14 |          |        |          |        | R   | 175.12   | 88.06  | 158.09   | 79.55  |          |        | 1     |



MS/MS Fragmentation of **LLPVLVHTFWIDTK**

Found in **sp|Q13505|MTX1\_HUMAN**, Metaxin-1 OS=Homo sapiens GN=MTX1 PE=1 SV=2

Match to Query 58152: 1969.158from(657.3934,3+)

Title: 1122: Sum of 2 scans in range 2461 (rt=64.8384, f=4, i=735) to 2462 (rt=64.8638, f=4, i=736)

[D:\lab212\membrane\GraceJoyce\iTRAQ\_37\_1.raw]

Data File: Submitted from 20120508-1(merge) by Mascot Daemon on JOYCE-VAIO

Monoisotopic mass of neutral peptide Mr(calc): 1969.158

Variable modifications:

K14 iTRAQ4plex (K)

Ions Score: 55.31 Expect: 0.001

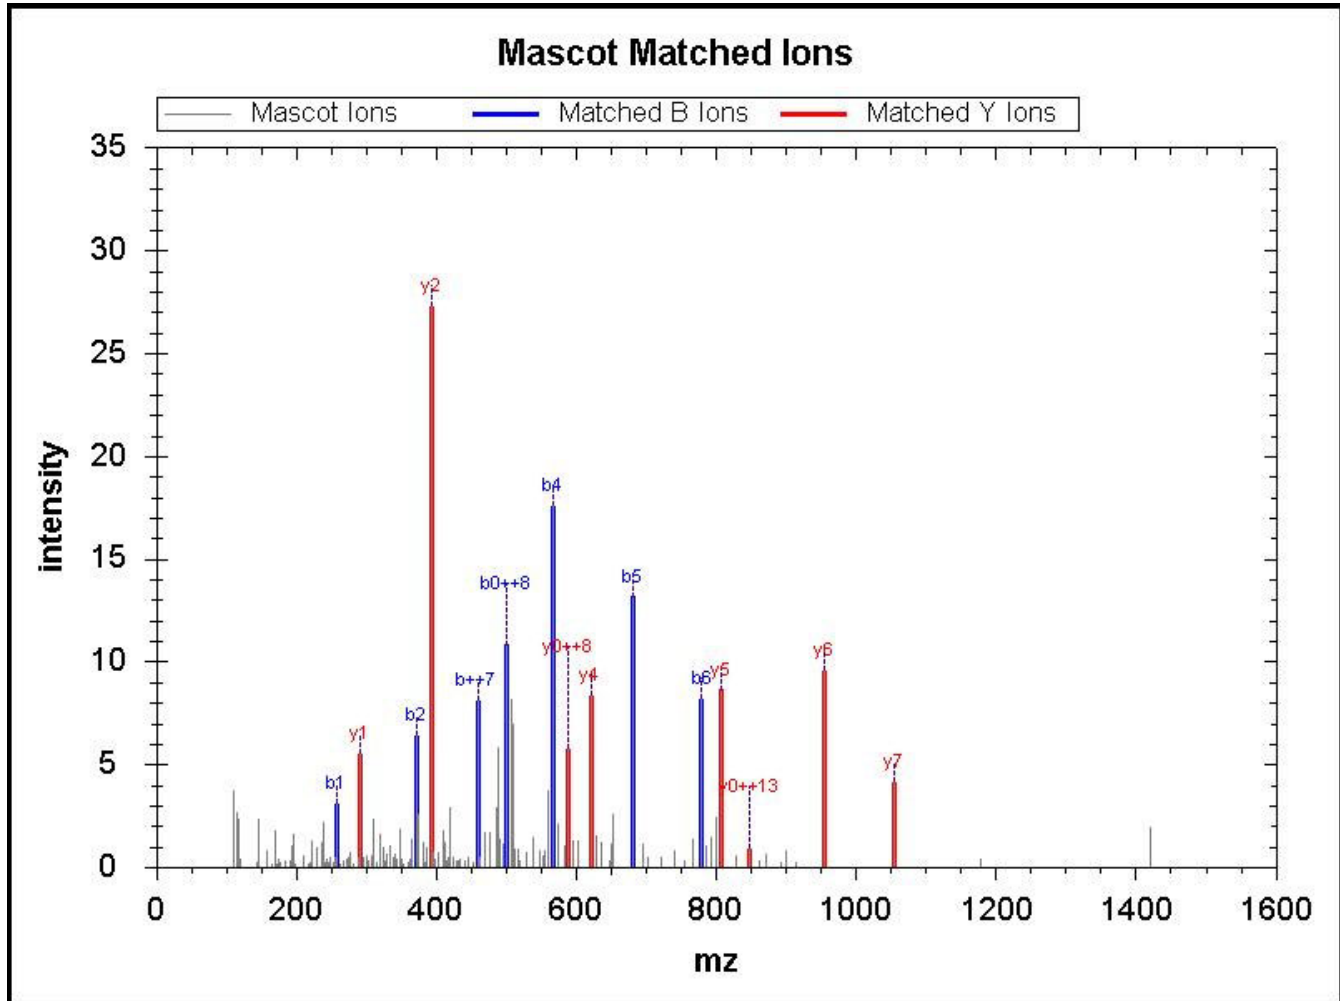

| No | b        | b++    | b0       | b0++   | Seq | y        | y++    | y*       | y*++   | y0       | y0++   | RevNo |
|----|----------|--------|----------|--------|-----|----------|--------|----------|--------|----------|--------|-------|
| 1  | 258.19   | 129.60 |          |        | L   |          |        |          |        |          |        | 14    |
| 2  | 371.28   | 186.14 |          |        | L   | 1,712.99 | 857.00 | 1,695.96 | 848.48 | 1,694.97 | 847.99 | 13    |
| 3  | 468.33   | 234.67 |          |        | P   | 1,599.90 | 800.45 | 1,582.88 | 791.94 | 1,581.89 | 791.45 | 12    |
| 4  | 567.40   | 284.20 |          |        | V   | 1,502.85 | 751.93 | 1,485.82 | 743.41 | 1,484.84 | 742.92 | 11    |
| 5  | 680.48   | 340.74 |          |        | L   | 1,403.78 | 702.39 | 1,386.75 | 693.88 | 1,385.77 | 693.39 | 10    |
| 6  | 779.55   | 390.28 |          |        | V   | 1,290.70 | 645.85 | 1,273.67 | 637.34 | 1,272.69 | 636.85 | 9     |
| 7  | 916.61   | 458.81 |          |        | H   | 1,191.63 | 596.32 | 1,174.60 | 587.80 | 1,173.62 | 587.31 | 8     |
| 8  | 1,017.66 | 509.33 | 999.65   | 500.33 | T   | 1,054.57 | 527.79 | 1,037.54 | 519.27 | 1,036.56 | 518.78 | 7     |
| 9  | 1,164.73 | 582.87 | 1,146.72 | 573.86 | F   | 953.52   | 477.26 | 936.49   | 468.75 | 935.51   | 468.26 | 6     |
| 10 | 1,350.81 | 675.91 | 1,332.79 | 666.90 | W   | 806.45   | 403.73 | 789.43   | 395.22 | 788.44   | 394.72 | 5     |
| 11 | 1,463.89 | 732.45 | 1,445.88 | 723.44 | I   | 620.37   | 310.69 | 603.35   | 302.18 | 602.36   | 301.69 | 4     |
| 12 | 1,578.92 | 789.96 | 1,560.91 | 780.96 | D   | 507.29   | 254.15 | 490.26   | 245.64 | 489.28   | 245.14 | 3     |
| 13 | 1,679.96 | 840.49 | 1,661.95 | 831.48 | T   | 392.26   | 196.63 | 375.24   | 188.12 | 374.25   | 187.63 | 2     |
| 14 |          |        |          |        | K   | 291.21   | 146.11 | 274.19   | 137.60 |          |        | 1     |

Query 75650 Hit 1

MS/MS Fragmentation of **VNQWTTNVVEQTLSQLTK**

Found in **sp|P63172|DYLT1\_HUMAN**, Dynein light chain Tctex-type 1 OS=Homo sapiens GN=DYNLT1 PE=1 SV=1

Match to Query 75650: 2376.281 from (793.101,3+)

Title: 1099: Scan 2455 (rt=64.6362, f=3, i=380) [D:\lab212\membrane\Grace\Joyce\iTRAQ\_27\_1.raw]

Data File: Submitted from 20120508-1 (merge) by Mascot Daemon on JOYCE-VAIO

Monoisotopic mass of neutral peptide Mr(calc): 2376.281

Variable modifications:

K18 iTRAQ4plex (K)

Ions Score: 55.21 Expect: 0.002

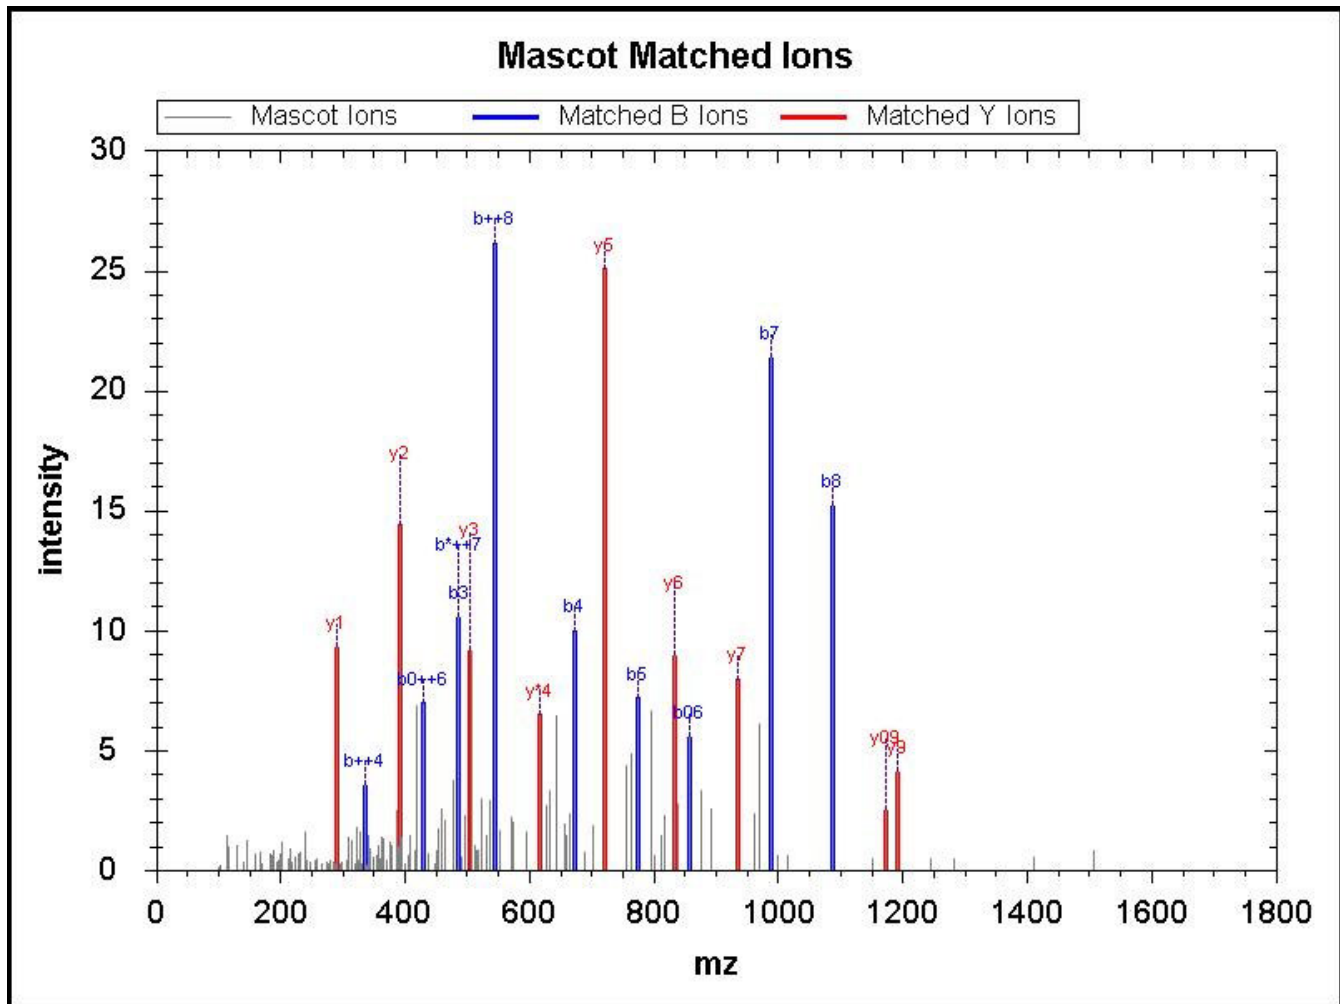

| No | b        | b++    | b*       | b*++   | b0       | b0++   | Seq | y        | y++      | y*       | y*++     | y0       | y0++     | RevNo |
|----|----------|--------|----------|--------|----------|--------|-----|----------|----------|----------|----------|----------|----------|-------|
| 1  | 244.18   | 122.59 |          |        |          |        | V   |          |          |          |          |          |          | 18    |
| 2  | 358.22   | 179.61 | 341.19   | 171.10 |          |        | N   | 2,134.13 | 1,067.57 | 2,117.10 | 1,059.05 | 2,116.12 | 1,058.56 | 17    |
| 3  | 486.28   | 243.64 | 469.25   | 235.13 |          |        | Q   | 2,020.08 | 1,010.55 | 2,003.06 | 1,002.03 | 2,002.07 | 1,001.54 | 16    |
| 4  | 672.36   | 336.68 | 655.33   | 328.17 |          |        | W   | 1,892.02 | 946.52   | 1,875.00 | 938.00   | 1,874.01 | 937.51   | 15    |
| 5  | 773.41   | 387.21 | 756.38   | 378.69 | 755.40   | 378.20 | T   | 1,705.95 | 853.48   | 1,688.92 | 844.96   | 1,687.93 | 844.47   | 14    |
| 6  | 874.45   | 437.73 | 857.43   | 429.22 | 856.44   | 428.73 | T   | 1,604.90 | 802.95   | 1,587.87 | 794.44   | 1,586.89 | 793.95   | 13    |
| 7  | 988.50   | 494.75 | 971.47   | 486.24 | 970.49   | 485.75 | N   | 1,503.85 | 752.43   | 1,486.82 | 743.92   | 1,485.84 | 743.42   | 12    |
| 8  | 1,087.57 | 544.29 | 1,070.54 | 535.77 | 1,069.55 | 535.28 | V   | 1,389.81 | 695.41   | 1,372.78 | 686.89   | 1,371.80 | 686.40   | 11    |
| 9  | 1,186.63 | 593.82 | 1,169.61 | 585.31 | 1,168.62 | 584.82 | V   | 1,290.74 | 645.87   | 1,273.71 | 637.36   | 1,272.73 | 636.87   | 10    |
| 10 | 1,315.68 | 658.34 | 1,298.65 | 649.83 | 1,297.67 | 649.34 | E   | 1,191.67 | 596.34   | 1,174.64 | 587.83   | 1,173.66 | 587.33   | 9     |
| 11 | 1,443.73 | 722.37 | 1,426.71 | 713.86 | 1,425.72 | 713.37 | Q   | 1,062.63 | 531.82   | 1,045.60 | 523.30   | 1,044.62 | 522.81   | 8     |
| 12 | 1,544.78 | 772.89 | 1,527.76 | 764.38 | 1,526.77 | 763.89 | T   | 934.57   | 467.79   | 917.54   | 459.27   | 916.56   | 458.78   | 7     |
| 13 | 1,657.87 | 829.44 | 1,640.84 | 820.92 | 1,639.86 | 820.43 | L   | 833.52   | 417.26   | 816.49   | 408.75   | 815.51   | 408.26   | 6     |
| 14 | 1,744.90 | 872.95 | 1,727.87 | 864.44 | 1,726.89 | 863.95 | S   | 720.44   | 360.72   | 703.41   | 352.21   | 702.43   | 351.72   | 5     |
| 15 | 1,872.96 | 936.98 | 1,855.93 | 928.47 | 1,854.95 | 927.98 | Q   | 633.41   | 317.21   | 616.38   | 308.69   | 615.39   | 308.20   | 4     |

|    |          |          |          |          |          |          |   |        |        |        |        |        |        |   |
|----|----------|----------|----------|----------|----------|----------|---|--------|--------|--------|--------|--------|--------|---|
| 16 | 1,986.04 | 993.52   | 1,969.01 | 985.01   | 1,968.03 | 984.52   | L | 505.35 | 253.18 | 488.32 | 244.66 | 487.34 | 244.17 | 3 |
| 17 | 2,087.09 | 1,044.05 | 2,070.06 | 1,035.53 | 2,069.08 | 1,035.04 | T | 392.26 | 196.63 | 375.24 | 188.12 | 374.25 | 187.63 | 2 |
| 18 |          |          |          |          |          |          | K | 291.21 | 146.11 | 274.19 | 137.60 |        |        | 1 |

Query 78471 Hit 1

MS/MS Fragmentation of **LLQLHITMPFSSPMEAEALVR**

Found in **sp|O75638|CTAG2\_HUMAN**, Cancer/testis antigen 2 OS=Homo sapiens GN=CTAG2 PE=2 SV=2

Match to Query 78471: 2455.303from(819.4417,3+)

Title: 1027: Sum of 2 scans in range 2325 (rt=61.5303, f=4, i=685) to 2326 (rt=61.5557, f=4, i=686)

[D:\lab212\membrane\Grace\Joyce\iTRAQ\_30\_1.raw]

Data File: Submitted from 20120508-1(merge) by Mascot Daemon on JOYCE-VAIO

Monoisotopic mass of neutral peptide Mr(calc): 2455.303

Variable modifications:

Ions Score: 55.18 Expect: 0.002

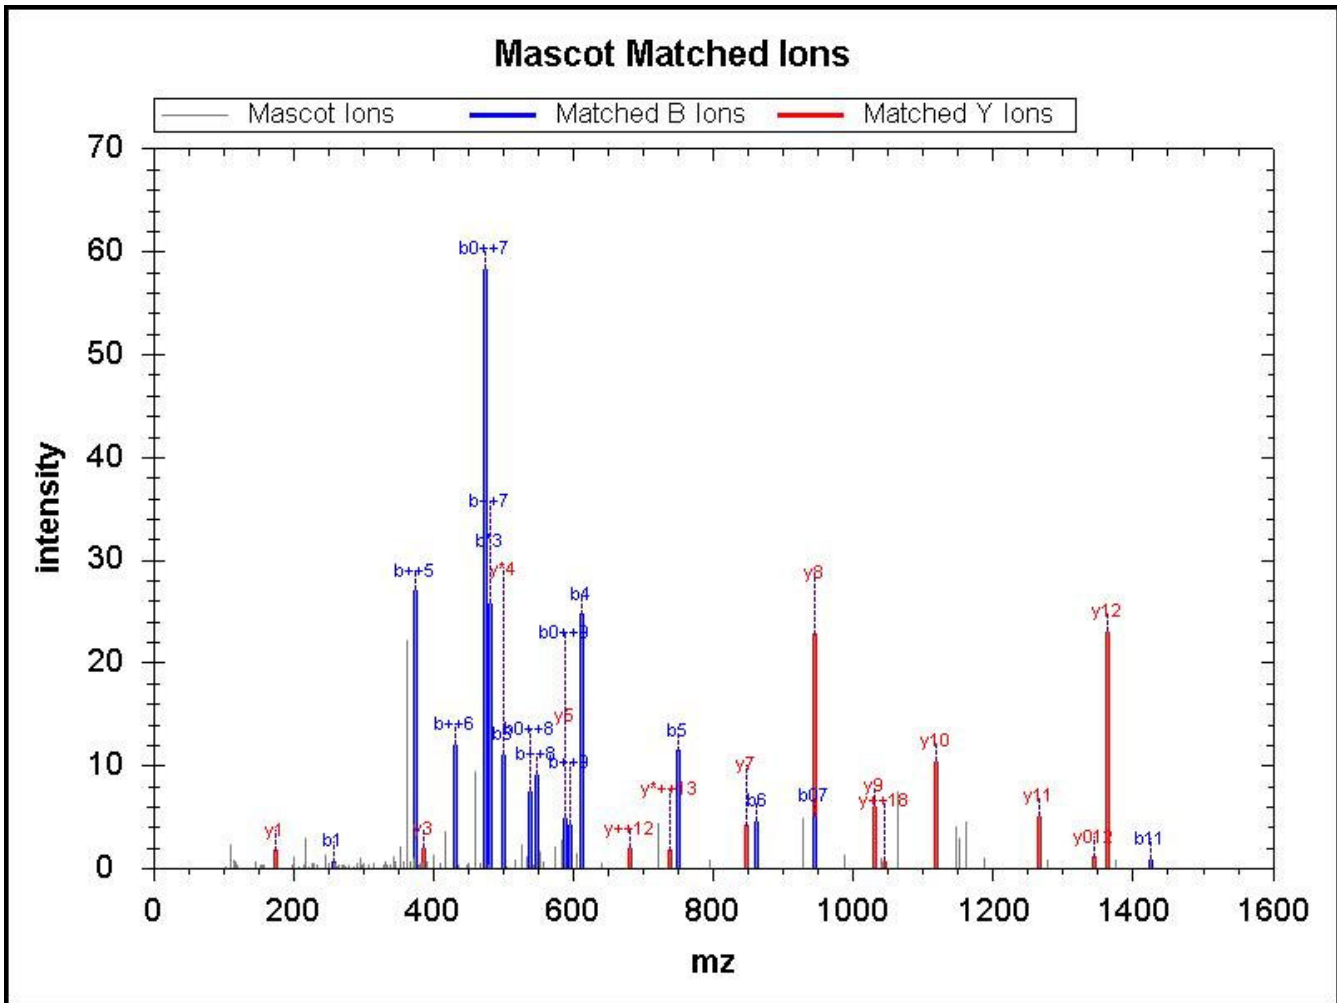

| No | b        | b++    | b*       | b*++   | b0       | b0++   | Seq | y        | y++      | y*       | y*++     | y0       | y0++     | RevNo |
|----|----------|--------|----------|--------|----------|--------|-----|----------|----------|----------|----------|----------|----------|-------|
| 1  | 258.19   | 129.60 |          |        |          |        | L   |          |          |          |          |          |          | 20    |
| 2  | 371.28   | 186.14 |          |        |          |        | L   | 2,199.13 | 1,100.07 | 2,182.10 | 1,091.56 | 2,181.12 | 1,091.06 | 19    |
| 3  | 499.34   | 250.17 | 482.31   | 241.66 |          |        | Q   | 2,086.05 | 1,043.53 | 2,069.02 | 1,035.01 | 2,068.04 | 1,034.52 | 18    |
| 4  | 612.42   | 306.71 | 595.39   | 298.20 |          |        | L   | 1,957.99 | 979.50   | 1,940.96 | 970.98   | 1,939.98 | 970.49   | 17    |
| 5  | 749.48   | 375.24 | 732.45   | 366.73 |          |        | H   | 1,844.90 | 922.96   | 1,827.88 | 914.44   | 1,826.89 | 913.95   | 16    |
| 6  | 862.56   | 431.79 | 845.54   | 423.27 |          |        | I   | 1,707.84 | 854.43   | 1,690.82 | 845.91   | 1,689.83 | 845.42   | 15    |
| 7  | 963.61   | 482.31 | 946.58   | 473.80 | 945.60   | 473.30 | T   | 1,594.76 | 797.88   | 1,577.73 | 789.37   | 1,576.75 | 788.88   | 14    |
| 8  | 1,094.65 | 547.83 | 1,077.62 | 539.32 | 1,076.64 | 538.82 | M   | 1,493.71 | 747.36   | 1,476.69 | 738.85   | 1,475.70 | 738.35   | 13    |
| 9  | 1,191.70 | 596.36 | 1,174.68 | 587.84 | 1,173.69 | 587.35 | P   | 1,362.67 | 681.84   | 1,345.65 | 673.33   | 1,344.66 | 672.83   | 12    |
| 10 | 1,338.77 | 669.89 | 1,321.75 | 661.38 | 1,320.76 | 660.88 | F   | 1,265.62 | 633.31   | 1,248.59 | 624.80   | 1,247.61 | 624.31   | 11    |
| 11 | 1,425.80 | 713.41 | 1,408.78 | 704.89 | 1,407.79 | 704.40 | S   | 1,118.55 | 559.78   | 1,101.52 | 551.27   | 1,100.54 | 550.77   | 10    |

|    |          |          |          |          |          |          |   |          |        |          |        |          |        |   |
|----|----------|----------|----------|----------|----------|----------|---|----------|--------|----------|--------|----------|--------|---|
| 12 | 1,512.84 | 756.92   | 1,495.81 | 748.41   | 1,494.83 | 747.92   | S | 1,031.52 | 516.26 | 1,014.49 | 507.75 | 1,013.51 | 507.26 | 9 |
| 13 | 1,609.89 | 805.45   | 1,592.86 | 796.93   | 1,591.88 | 796.44   | P | 944.49   | 472.75 | 927.46   | 464.23 | 926.48   | 463.74 | 8 |
| 14 | 1,740.93 | 870.97   | 1,723.90 | 862.46   | 1,722.92 | 861.96   | M | 847.43   | 424.22 | 830.41   | 415.71 | 829.42   | 415.22 | 7 |
| 15 | 1,869.97 | 935.49   | 1,852.95 | 926.98   | 1,851.96 | 926.48   | E | 716.39   | 358.70 | 699.37   | 350.19 | 698.38   | 349.70 | 6 |
| 16 | 1,941.01 | 971.01   | 1,923.98 | 962.50   | 1,923.00 | 962.00   | A | 587.35   | 294.18 | 570.32   | 285.67 | 569.34   | 285.17 | 5 |
| 17 | 2,070.05 | 1,035.53 | 2,053.03 | 1,027.02 | 2,052.04 | 1,026.52 | E | 516.31   | 258.66 | 499.29   | 250.15 | 498.30   | 249.66 | 4 |
| 18 | 2,183.14 | 1,092.07 | 2,166.11 | 1,083.56 | 2,165.13 | 1,083.07 | L | 387.27   | 194.14 | 370.24   | 185.63 |          |        | 3 |
| 19 | 2,282.20 | 1,141.61 | 2,265.18 | 1,133.09 | 2,264.19 | 1,132.60 | V | 274.19   | 137.60 | 257.16   | 129.08 |          |        | 2 |
| 20 |          |          |          |          |          |          | R | 175.12   | 88.06  | 158.09   | 79.55  |          |        | 1 |

Query 32347 Hit 1

MS/MS Fragmentation of **LLLSTLTLLSK**

Found in **sp|Q96EK6|GNA1\_HUMAN**, Glucosamine 6-phosphate N-acetyltransferase OS=Homo sapiens GN=GPNPAT1 PE=1 SV=1

Match to Query 32347: 1488.975from(745.4948,2+)

Title: 1060: Sum of 2 scans in range 2324 (rt=62.0053, f=4, i=719) to 2325 (rt=62.0307, f=4, i=720)

[D:\lab212\membrane\Grace\Joyce\iTRAQ\_27\_2\_327.raw]

Data File: Submitted from 20120508-1(merge) by Mascot Daemon on JOYCE-VAIO

Monoisotopic mass of neutral peptide Mr(calc): 1488.975

Variable modifications:

K11 iTRAQ4plex (K)

Ions Score: 55.07 Expect: 0.000

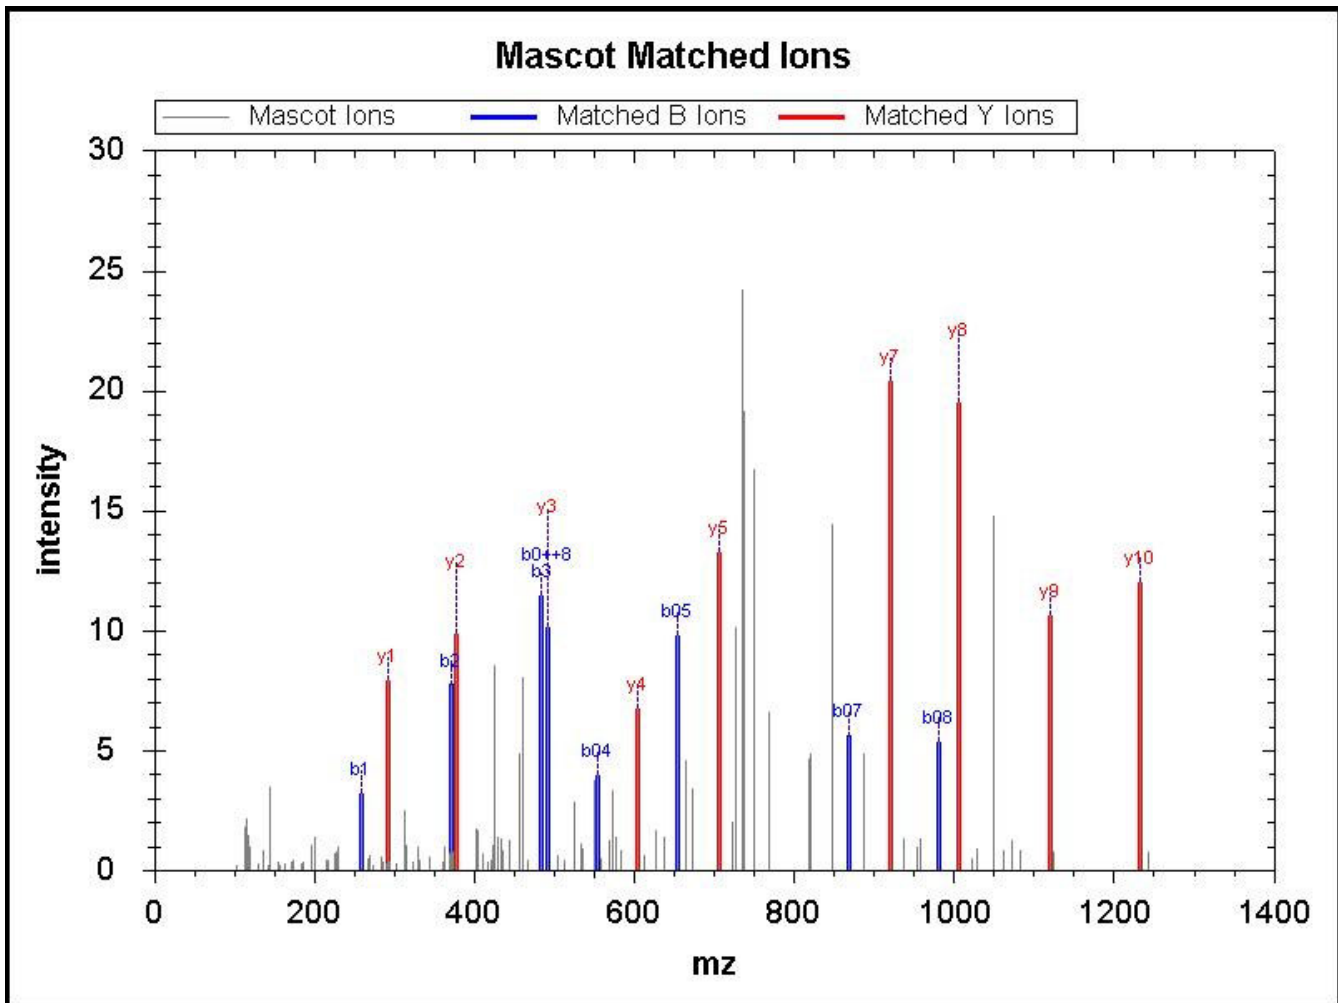

| No | b      | b++    | b0     | b0++   | Seq | y        | y++    | y*       | y*++   | y0       | y0++   | RevNo |
|----|--------|--------|--------|--------|-----|----------|--------|----------|--------|----------|--------|-------|
| 1  | 258.19 | 129.60 |        |        | L   |          |        |          |        |          |        | 11    |
| 2  | 371.28 | 186.14 |        |        | L   | 1,232.79 | 616.90 | 1,215.77 | 608.39 | 1,214.78 | 607.90 | 10    |
| 3  | 484.36 | 242.68 |        |        | L   | 1,119.71 | 560.36 | 1,102.68 | 551.85 | 1,101.70 | 551.35 | 9     |
| 4  | 571.39 | 286.20 | 553.38 | 277.20 | S   | 1,006.63 | 503.82 | 989.60   | 495.30 | 988.62   | 494.81 | 8     |

|    |          |        |          |        |   |        |        |        |        |        |        |   |
|----|----------|--------|----------|--------|---|--------|--------|--------|--------|--------|--------|---|
| 5  | 672.44   | 336.72 | 654.43   | 327.72 | T | 919.59 | 460.30 | 902.57 | 451.79 | 901.58 | 451.30 | 7 |
| 6  | 785.53   | 393.27 | 767.51   | 384.26 | L | 818.55 | 409.78 | 801.52 | 401.26 | 800.54 | 400.77 | 6 |
| 7  | 886.57   | 443.79 | 868.56   | 434.78 | T | 705.46 | 353.23 | 688.44 | 344.72 | 687.45 | 344.23 | 5 |
| 8  | 999.66   | 500.33 | 981.65   | 491.33 | L | 604.41 | 302.71 | 587.39 | 294.20 | 586.40 | 293.71 | 4 |
| 9  | 1,112.74 | 556.87 | 1,094.73 | 547.87 | L | 491.33 | 246.17 | 474.30 | 237.66 | 473.32 | 237.16 | 3 |
| 10 | 1,199.77 | 600.39 | 1,181.76 | 591.38 | S | 378.25 | 189.63 | 361.22 | 181.11 | 360.24 | 180.62 | 2 |
| 11 |          |        |          |        | K | 291.21 | 146.11 | 274.19 | 137.60 |        |        | 1 |

Query 46875 Hit 1

MS/MS Fragmentation of **IHFVQDTTLSEPR**

Found in **sp|Q8N1G2|MTR1\_HUMAN**, Cap-specific mRNA (nucleoside-2'-O-)-methyltransferase 1 OS=Homo sapiens GN=FTSJD2 PE=1 SV=1

Match to Query 46875: 1756.919from(586.647,3+)

Title: 454: Scan 1057 (rt=33.2589, f=3, i=160) [D:\lab212\membrane\Grace\Joyce\iTRAQ\_37\_2.raw]

Data File: Submitted from 20120508-1(merge) by Mascot Daemon on JOYCE-VAIO

Monoisotopic mass of neutral peptide Mr(calc): 1756.919

Variable modifications:

Ions Score: 55.02 Expect: 0.003

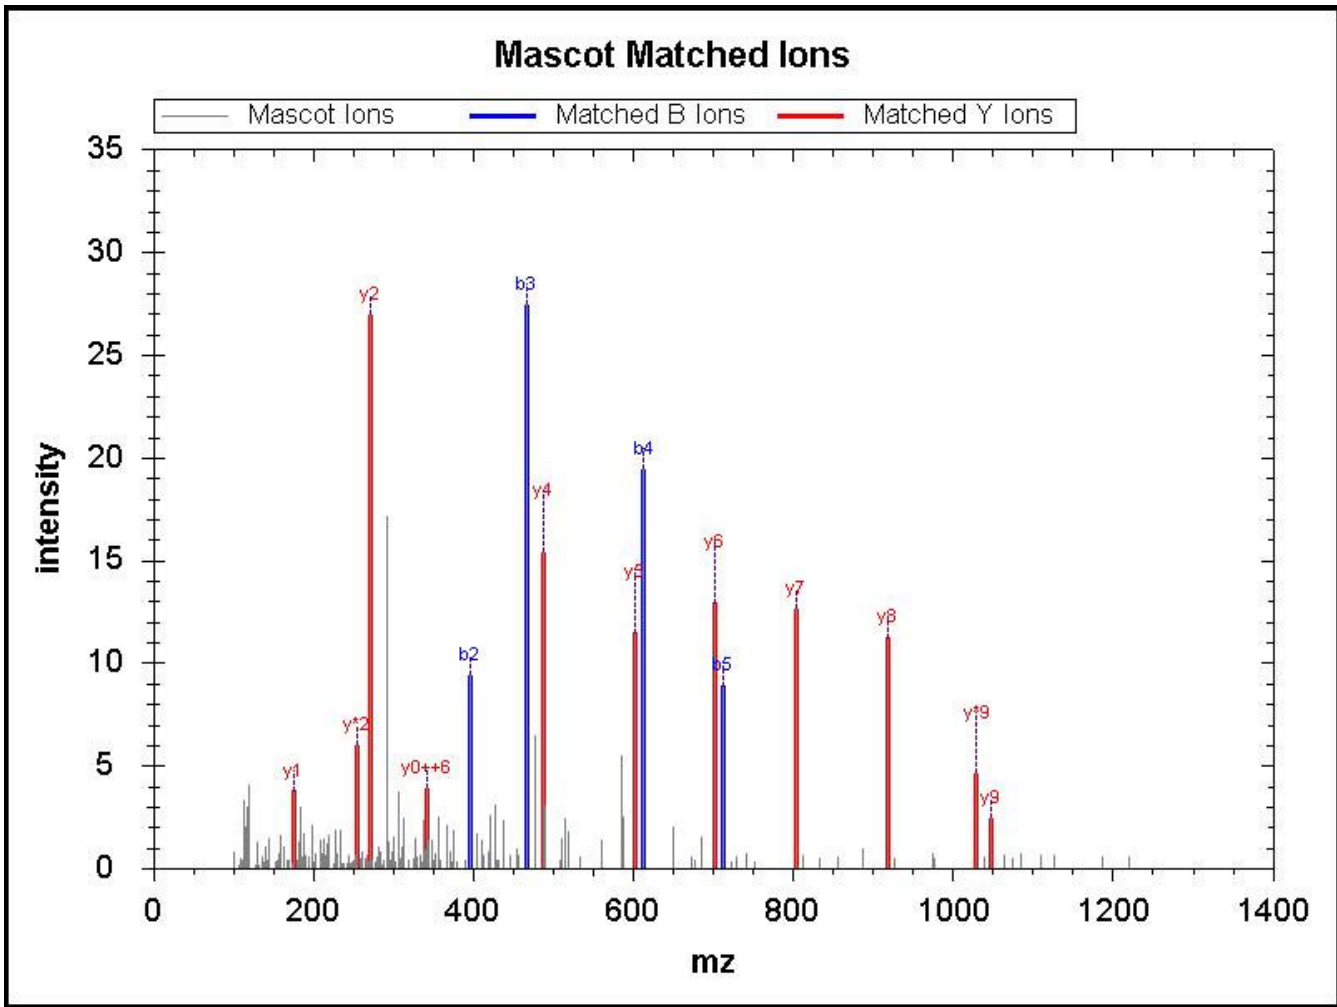

| No | b      | b++    | b*     | b*++   | b0     | b0++   | Seq | y        | y++    | y*       | y*++   | y0       | y0++   | RevNo |
|----|--------|--------|--------|--------|--------|--------|-----|----------|--------|----------|--------|----------|--------|-------|
| 1  | 258.19 | 129.60 |        |        |        |        | I   |          |        |          |        |          |        | 14    |
| 2  | 395.25 | 198.13 |        |        |        |        | H   | 1,500.74 | 750.88 | 1,483.72 | 742.36 | 1,482.73 | 741.87 | 13    |
| 3  | 466.29 | 233.65 |        |        |        |        | A   | 1,363.69 | 682.35 | 1,346.66 | 673.83 | 1,345.67 | 673.34 | 12    |
| 4  | 613.36 | 307.18 |        |        |        |        | F   | 1,292.65 | 646.83 | 1,275.62 | 638.31 | 1,274.64 | 637.82 | 11    |
| 5  | 712.43 | 356.72 |        |        |        |        | V   | 1,145.58 | 573.29 | 1,128.55 | 564.78 | 1,127.57 | 564.29 | 10    |
| 6  | 840.48 | 420.75 | 823.46 | 412.23 |        |        | Q   | 1,046.51 | 523.76 | 1,029.48 | 515.25 | 1,028.50 | 514.75 | 9     |
| 7  | 955.51 | 478.26 | 938.49 | 469.75 | 937.50 | 469.25 | D   | 918.45   | 459.73 | 901.43   | 451.22 | 900.44   | 450.72 | 8     |

|    |          |        |          |        |          |        |   |        |        |        |        |        |        |   |
|----|----------|--------|----------|--------|----------|--------|---|--------|--------|--------|--------|--------|--------|---|
| 8  | 1,056.56 | 528.78 | 1,039.53 | 520.27 | 1,038.55 | 519.78 | T | 803.43 | 402.22 | 786.40 | 393.70 | 785.42 | 393.21 | 7 |
| 9  | 1,157.61 | 579.31 | 1,140.58 | 570.79 | 1,139.60 | 570.30 | T | 702.38 | 351.69 | 685.35 | 343.18 | 684.37 | 342.69 | 6 |
| 10 | 1,270.69 | 635.85 | 1,253.66 | 627.34 | 1,252.68 | 626.84 | L | 601.33 | 301.17 | 584.30 | 292.66 | 583.32 | 292.16 | 5 |
| 11 | 1,357.72 | 679.37 | 1,340.70 | 670.85 | 1,339.71 | 670.36 | S | 488.25 | 244.63 | 471.22 | 236.11 | 470.24 | 235.62 | 4 |
| 12 | 1,486.77 | 743.89 | 1,469.74 | 735.37 | 1,468.76 | 734.88 | E | 401.21 | 201.11 | 384.19 | 192.60 | 383.20 | 192.11 | 3 |
| 13 | 1,583.82 | 792.41 | 1,566.79 | 783.90 | 1,565.81 | 783.41 | P | 272.17 | 136.59 | 255.15 | 128.08 |        |        | 2 |
| 14 |          |        |          |        |          |        | R | 175.12 | 88.06  | 158.09 | 79.55  |        |        | 1 |

Query 84211 Hit 1

MS/MS Fragmentation of **LHAATPPTFGVDLINELVENFGR**

Found in **sp|Q8TF05|PP4R1\_HUMAN**, Serine/threonine-protein phosphatase 4 regulatory subunit 1 OS=Homo sapiens GN=PPP4R1 PE=1 SV=1

Match to Query 84211: 2653.402from(885.4745,3+)

Title: 1245: Sum of 2 scans in range 2976 (rt=75.3522, f=2, i=511) to 2977 (rt=75.3776, f=2, i=512)

[D:\lab212\membrane\GraceJoyce\iTRAQ\_32\_1.raw]

Data File:Submitted from 20120508-1(merge) by Mascot Daemon on JOYCE-VAIO

Monoisotopic mass of neutral peptide Mr(calc): 2653.402

Variable modifications:

Ions Score: 55.01 Expect: 0.003

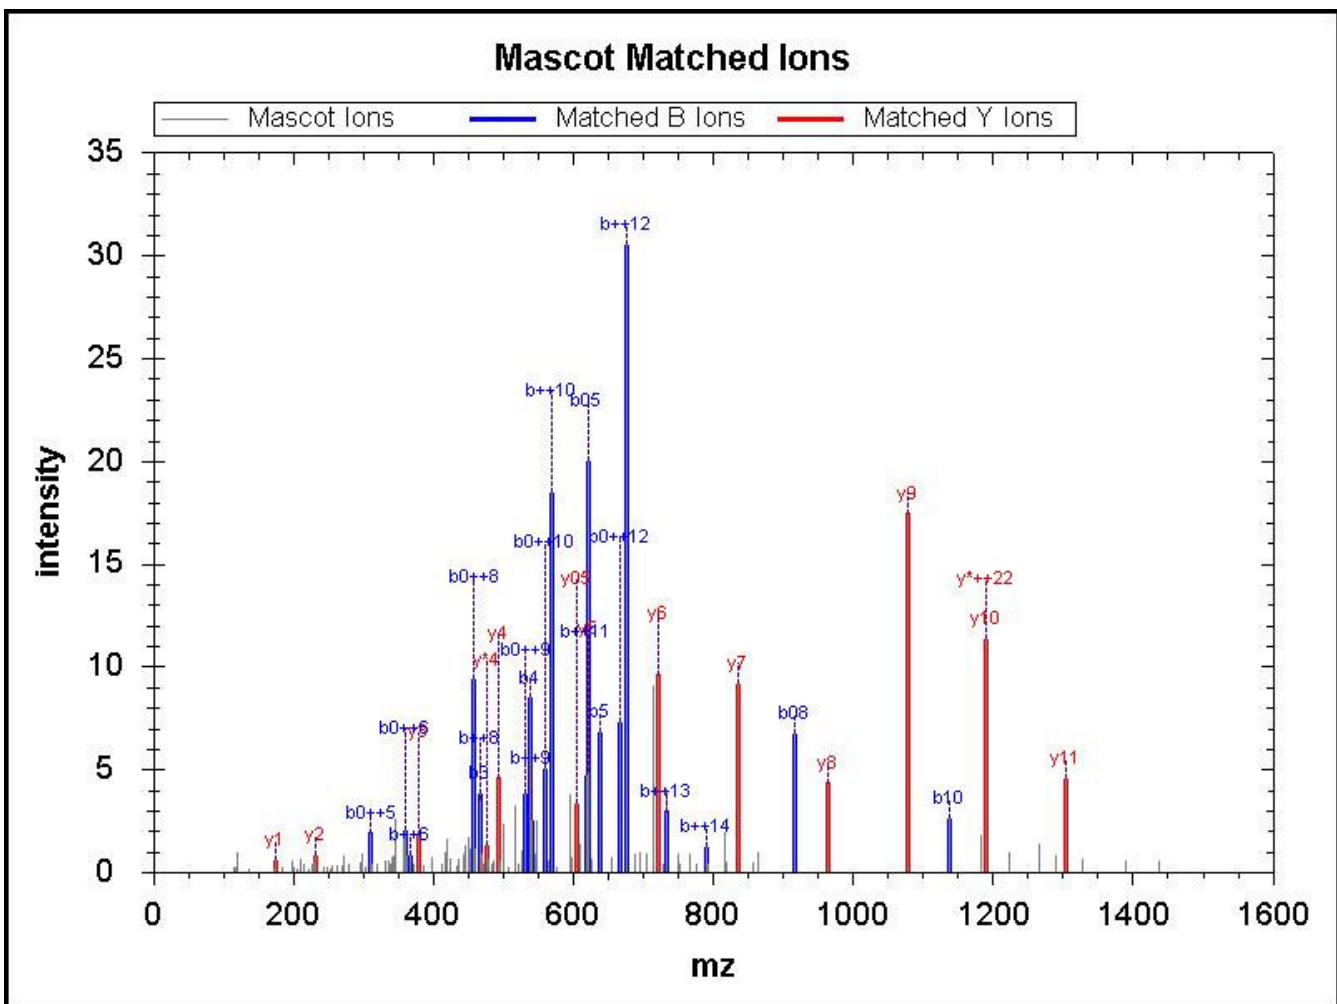

|    |          |          |          |          |          |          |   |          |        |          |        |          |        |    |
|----|----------|----------|----------|----------|----------|----------|---|----------|--------|----------|--------|----------|--------|----|
| 7  | 832.48   | 416.74   |          |          | 814.47   | 407.74   | P | 1,919.99 | 960.50 | 1,902.96 | 951.98 | 1,901.98 | 951.49 | 17 |
| 8  | 933.53   | 467.27   |          |          | 915.52   | 458.26   | T | 1,822.93 | 911.97 | 1,805.91 | 903.46 | 1,804.92 | 902.97 | 16 |
| 9  | 1,080.60 | 540.80   |          |          | 1,062.59 | 531.80   | F | 1,721.89 | 861.45 | 1,704.86 | 852.93 | 1,703.88 | 852.44 | 15 |
| 10 | 1,137.62 | 569.31   |          |          | 1,119.61 | 560.31   | G | 1,574.82 | 787.91 | 1,557.79 | 779.40 | 1,556.81 | 778.91 | 14 |
| 11 | 1,236.69 | 618.85   |          |          | 1,218.68 | 609.84   | V | 1,517.80 | 759.40 | 1,500.77 | 750.89 | 1,499.79 | 750.40 | 13 |
| 12 | 1,351.71 | 676.36   |          |          | 1,333.70 | 667.35   | D | 1,418.73 | 709.87 | 1,401.70 | 701.35 | 1,400.72 | 700.86 | 12 |
| 13 | 1,464.80 | 732.90   |          |          | 1,446.79 | 723.90   | L | 1,303.70 | 652.35 | 1,286.67 | 643.84 | 1,285.69 | 643.35 | 11 |
| 14 | 1,577.88 | 789.44   |          |          | 1,559.87 | 780.44   | I | 1,190.62 | 595.81 | 1,173.59 | 587.30 | 1,172.61 | 586.81 | 10 |
| 15 | 1,691.92 | 846.47   | 1,674.90 | 837.95   | 1,673.91 | 837.46   | N | 1,077.53 | 539.27 | 1,060.51 | 530.76 | 1,059.52 | 530.26 | 9  |
| 16 | 1,820.97 | 910.99   | 1,803.94 | 902.47   | 1,802.96 | 901.98   | E | 963.49   | 482.25 | 946.46   | 473.74 | 945.48   | 473.24 | 8  |
| 17 | 1,934.05 | 967.53   | 1,917.02 | 959.02   | 1,916.04 | 958.52   | L | 834.45   | 417.73 | 817.42   | 409.21 | 816.44   | 408.72 | 7  |
| 18 | 2,033.12 | 1,017.06 | 2,016.09 | 1,008.55 | 2,015.11 | 1,008.06 | V | 721.36   | 361.18 | 704.34   | 352.67 | 703.35   | 352.18 | 6  |
| 19 | 2,162.16 | 1,081.58 | 2,145.13 | 1,073.07 | 2,144.15 | 1,072.58 | E | 622.29   | 311.65 | 605.27   | 303.14 | 604.28   | 302.65 | 5  |
| 20 | 2,276.20 | 1,138.61 | 2,259.18 | 1,130.09 | 2,258.19 | 1,129.60 | N | 493.25   | 247.13 | 476.23   | 238.62 |          |        | 4  |
| 21 | 2,423.27 | 1,212.14 | 2,406.25 | 1,203.63 | 2,405.26 | 1,203.13 | F | 379.21   | 190.11 | 362.18   | 181.59 |          |        | 3  |
| 22 | 2,480.29 | 1,240.65 | 2,463.27 | 1,232.14 | 2,462.28 | 1,231.65 | G | 232.14   | 116.57 | 215.11   | 108.06 |          |        | 2  |
| 23 |          |          |          |          |          |          | R | 175.12   | 88.06  | 158.09   | 79.55  |          |        | 1  |

Query 79296 Hit 1

MS/MS Fragmentation of **DLTKPVVTISDEPDILYK**

Found in **sp|P82664|RT10\_HUMAN**, 28S ribosomal protein S10

Match to Query 79296: 2477.393from(826.8051,3+)

Title: 665: Sum of 2 scans in range 1514 (rt=43.4424, f=4, i=435) to 1515 (rt=43.4678, f=4, i=436)

[D:\lab212\membrane\GraceJoyce\iTRAQ\_38\_1.raw]

Data File: Submitted from 20120508-1(merge) by Mascot Daemon on JOYCE-VAIO

Monoisotopic mass of neutral peptide Mr(calc): 2477.393

Variable modifications:

K4 iTRAQ4plex (K)

K18 iTRAQ4plex (K)

Ions Score: 54.96 Expect: 0.001

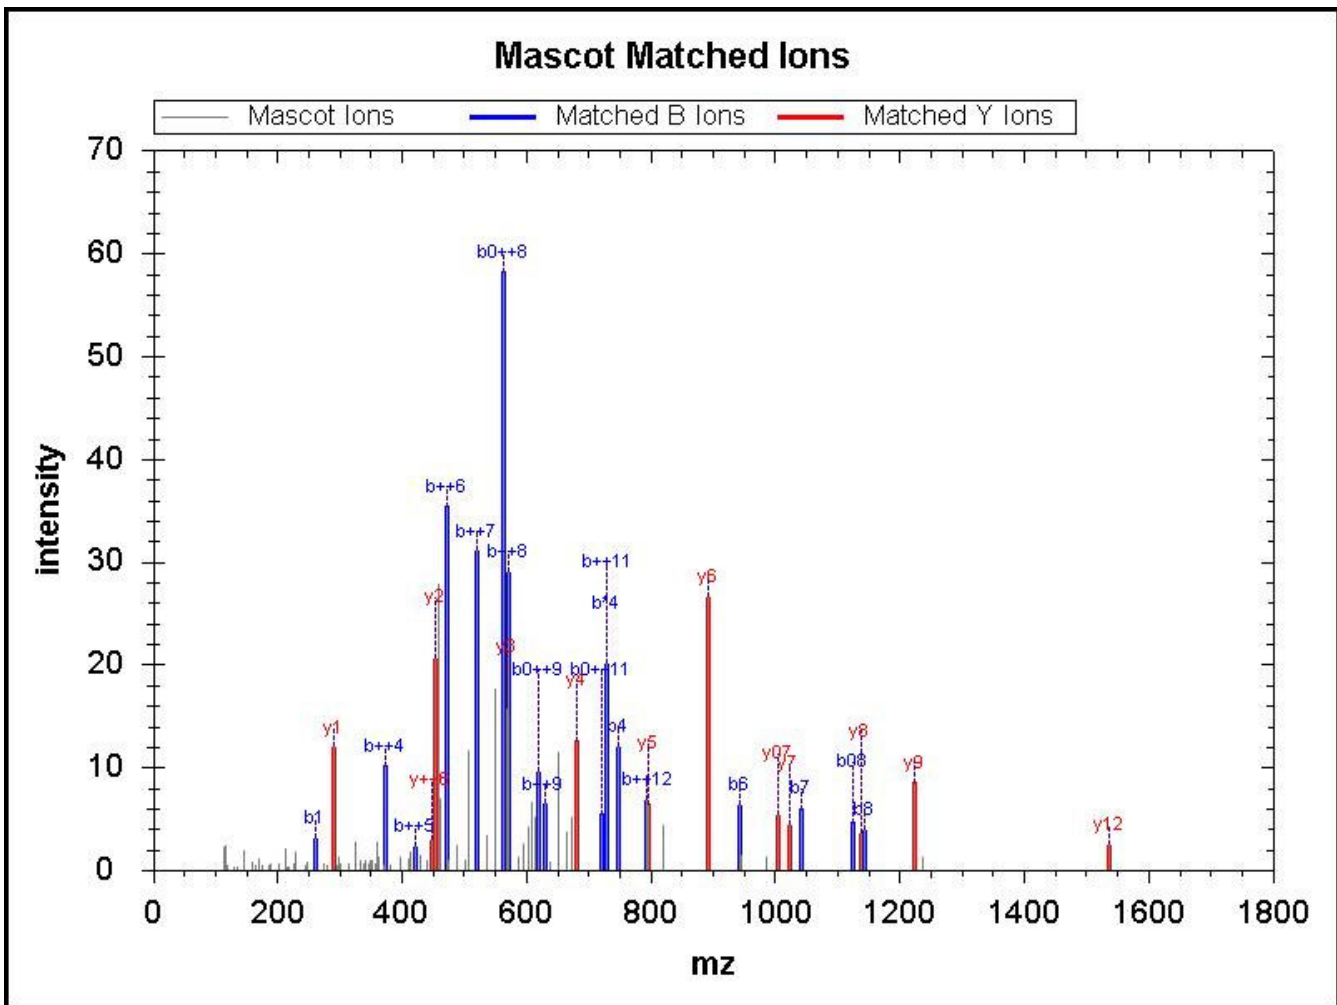

| No | b        | b++      | b*       | b*++     | b0       | b0++     | Seq | y        | y++      | y*       | y*++     | y0       | y0++     | RevNo |
|----|----------|----------|----------|----------|----------|----------|-----|----------|----------|----------|----------|----------|----------|-------|
| 1  | 260.14   | 130.57   |          |          | 242.13   | 121.57   | D   |          |          |          |          |          |          | 18    |
| 2  | 373.22   | 187.11   |          |          | 355.21   | 178.11   | L   | 2,219.28 | 1,110.14 | 2,202.25 | 1,101.63 | 2,201.27 | 1,101.14 | 17    |
| 3  | 474.27   | 237.64   |          |          | 456.26   | 228.63   | T   | 2,106.19 | 1,053.60 | 2,089.17 | 1,045.09 | 2,088.18 | 1,044.60 | 16    |
| 4  | 746.47   | 373.74   | 729.44   | 365.22   | 728.45   | 364.73   | K   | 2,005.15 | 1,003.08 | 1,988.12 | 994.56   | 1,987.14 | 994.07   | 15    |
| 5  | 843.52   | 422.26   | 826.49   | 413.75   | 825.51   | 413.26   | P   | 1,732.95 | 866.98   | 1,715.92 | 858.46   | 1,714.94 | 857.97   | 14    |
| 6  | 942.59   | 471.80   | 925.56   | 463.28   | 924.58   | 462.79   | V   | 1,635.90 | 818.45   | 1,618.87 | 809.94   | 1,617.89 | 809.45   | 13    |
| 7  | 1,041.65 | 521.33   | 1,024.63 | 512.82   | 1,023.64 | 512.33   | V   | 1,536.83 | 768.92   | 1,519.80 | 760.40   | 1,518.82 | 759.91   | 12    |
| 8  | 1,142.70 | 571.85   | 1,125.68 | 563.34   | 1,124.69 | 562.85   | T   | 1,437.76 | 719.38   | 1,420.73 | 710.87   | 1,419.75 | 710.38   | 11    |
| 9  | 1,255.79 | 628.40   | 1,238.76 | 619.88   | 1,237.78 | 619.39   | I   | 1,336.71 | 668.86   | 1,319.69 | 660.35   | 1,318.70 | 659.85   | 10    |
| 10 | 1,342.82 | 671.91   | 1,325.79 | 663.40   | 1,324.81 | 662.91   | S   | 1,223.63 | 612.32   | 1,206.60 | 603.80   | 1,205.62 | 603.31   | 9     |
| 11 | 1,457.85 | 729.43   | 1,440.82 | 720.91   | 1,439.83 | 720.42   | D   | 1,136.60 | 568.80   | 1,119.57 | 560.29   | 1,118.58 | 559.80   | 8     |
| 12 | 1,586.89 | 793.95   | 1,569.86 | 785.43   | 1,568.88 | 784.94   | E   | 1,021.57 | 511.29   | 1,004.54 | 502.77   | 1,003.56 | 502.28   | 7     |
| 13 | 1,683.94 | 842.47   | 1,666.91 | 833.96   | 1,665.93 | 833.47   | P   | 892.53   | 446.77   | 875.50   | 438.25   | 874.52   | 437.76   | 6     |
| 14 | 1,798.97 | 899.99   | 1,781.94 | 891.47   | 1,780.96 | 890.98   | D   | 795.47   | 398.24   | 778.45   | 389.73   | 777.46   | 389.23   | 5     |
| 15 | 1,912.05 | 956.53   | 1,895.03 | 948.02   | 1,894.04 | 947.52   | I   | 680.45   | 340.73   | 663.42   | 332.21   |          |          | 4     |
| 16 | 2,025.14 | 1,013.07 | 2,008.11 | 1,004.56 | 2,007.13 | 1,004.07 | L   | 567.36   | 284.18   | 550.34   | 275.67   |          |          | 3     |
| 17 | 2,188.20 | 1,094.60 | 2,171.17 | 1,086.09 | 2,170.19 | 1,085.60 | Y   | 454.28   | 227.64   | 437.25   | 219.13   |          |          | 2     |
| 18 |          |          |          |          |          |          | K   | 291.21   | 146.11   | 274.19   | 137.60   |          |          | 1     |

Query 63177 Hit 1

MS/MS Fragmentation of **RQPDSYFSVLNAFIDR**

Found in **sp|Q9Y4P1|ATG4B\_HUMAN**, Cysteine protease ATG4B OS=Homo sapiens GN=ATG4B PE=1 SV=2

Match to Query 63177: 2071.067from(691.363,3+)

Title: 1059: Sum of 2 scans in range 2281 (rt=61.0739, f=4, i=707) to 2282 (rt=61.0993, f=4, i=708)



[D:\lab212\membrane\Grace\Joyce\iTRAQ\_40\_1.raw]

Data File: Submitted from 20120508-1(merge) by Mascot Daemon on JOYCE-VAIO

Monoisotopic mass of neutral peptide Mr(calc): 2071.067

Variable modifications:

Ions Score: 54.94 Expect: 0.003

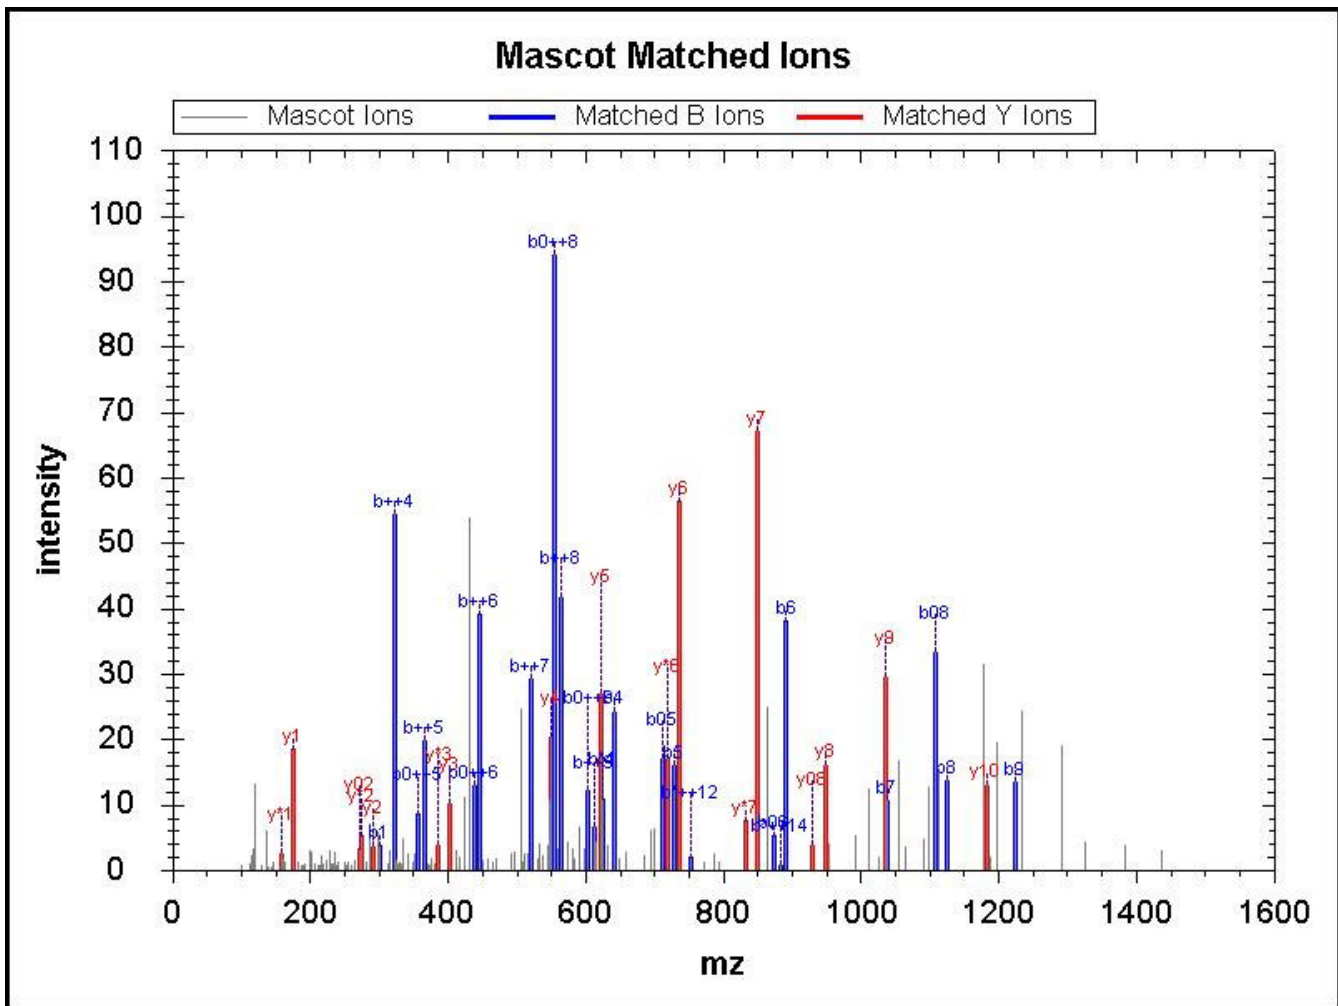

| No | b        | b++    | b*       | b*++   | b0       | b0++   | Seq | y        | y++    | y*       | y*++   | y0       | y0++   | RevNo |
|----|----------|--------|----------|--------|----------|--------|-----|----------|--------|----------|--------|----------|--------|-------|
| 1  | 301.21   | 151.11 | 284.18   | 142.60 |          |        | R   |          |        |          |        |          |        | 16    |
| 2  | 429.27   | 215.14 | 412.24   | 206.62 |          |        | Q   | 1,771.86 | 886.44 | 1,754.84 | 877.92 | 1,753.85 | 877.43 | 15    |
| 3  | 526.32   | 263.66 | 509.30   | 255.15 |          |        | P   | 1,643.81 | 822.41 | 1,626.78 | 813.89 | 1,625.80 | 813.40 | 14    |
| 4  | 641.35   | 321.18 | 624.32   | 312.66 | 623.34   | 312.17 | D   | 1,546.75 | 773.88 | 1,529.73 | 765.37 | 1,528.74 | 764.88 | 13    |
| 5  | 728.38   | 364.69 | 711.35   | 356.18 | 710.37   | 355.69 | S   | 1,431.73 | 716.37 | 1,414.70 | 707.85 | 1,413.72 | 707.36 | 12    |
| 6  | 891.44   | 446.23 | 874.42   | 437.71 | 873.43   | 437.22 | Y   | 1,344.69 | 672.85 | 1,327.67 | 664.34 | 1,326.68 | 663.85 | 11    |
| 7  | 1,038.51 | 519.76 | 1,021.49 | 511.25 | 1,020.50 | 510.75 | F   | 1,181.63 | 591.32 | 1,164.60 | 582.81 | 1,163.62 | 582.31 | 10    |
| 8  | 1,125.54 | 563.28 | 1,108.52 | 554.76 | 1,107.53 | 554.27 | S   | 1,034.56 | 517.79 | 1,017.54 | 509.27 | 1,016.55 | 508.78 | 9     |
| 9  | 1,224.61 | 612.81 | 1,207.59 | 604.30 | 1,206.60 | 603.80 | V   | 947.53   | 474.27 | 930.50   | 465.76 | 929.52   | 465.26 | 8     |
| 10 | 1,337.70 | 669.35 | 1,320.67 | 660.84 | 1,319.69 | 660.35 | L   | 848.46   | 424.73 | 831.44   | 416.22 | 830.45   | 415.73 | 7     |
| 11 | 1,451.74 | 726.37 | 1,434.71 | 717.86 | 1,433.73 | 717.37 | N   | 735.38   | 368.19 | 718.35   | 359.68 | 717.37   | 359.19 | 6     |
| 12 | 1,522.78 | 761.89 | 1,505.75 | 753.38 | 1,504.77 | 752.89 | A   | 621.34   | 311.17 | 604.31   | 302.66 | 603.32   | 302.17 | 5     |
| 13 | 1,669.85 | 835.43 | 1,652.82 | 826.91 | 1,651.84 | 826.42 | F   | 550.30   | 275.65 | 533.27   | 267.14 | 532.29   | 266.65 | 4     |
| 14 | 1,782.93 | 891.97 | 1,765.90 | 883.46 | 1,764.92 | 882.96 | I   | 403.23   | 202.12 | 386.20   | 193.61 | 385.22   | 193.11 | 3     |
| 15 | 1,897.96 | 949.48 | 1,880.93 | 940.97 | 1,879.95 | 940.48 | D   | 290.15   | 145.58 | 273.12   | 137.06 | 272.14   | 136.57 | 2     |
| 16 |          |        |          |        |          |        | R   | 175.12   | 88.06  | 158.09   | 79.55  |          |        | 1     |

Query 87532 Hit 1

MS/MS Fragmentation of QFHVLLSTIHELQQTLENDEK

Found in [sp|Q619Y2|THOC7\\_HUMAN](#), THO complex subunit 7 homolog OS=Homo sapiens GN=THOC7 PE=1 SV=3  
 Match to Query 87532: 2809.488from(937.5034,3+)  
 Title: 971: Sum of 2 scans in range 2474 (rt=64.0117, f=4, i=637) to 2475 (rt=64.0371, f=4, i=638)  
 [D:\lab212\membrane\GraceJoyce\iTRAQ\_48\_1.raw]  
 Data File: Submitted from 20120508-1(merge) by Mascot Daemon on JOYCE-VAIO  
 Monoisotopic mass of neutral peptide Mr(calc): 2809.488  
 Variable modifications:  
 K21 iTRAQ4plex (K)  
 Ions Score: 54.9 Expect: 0.002

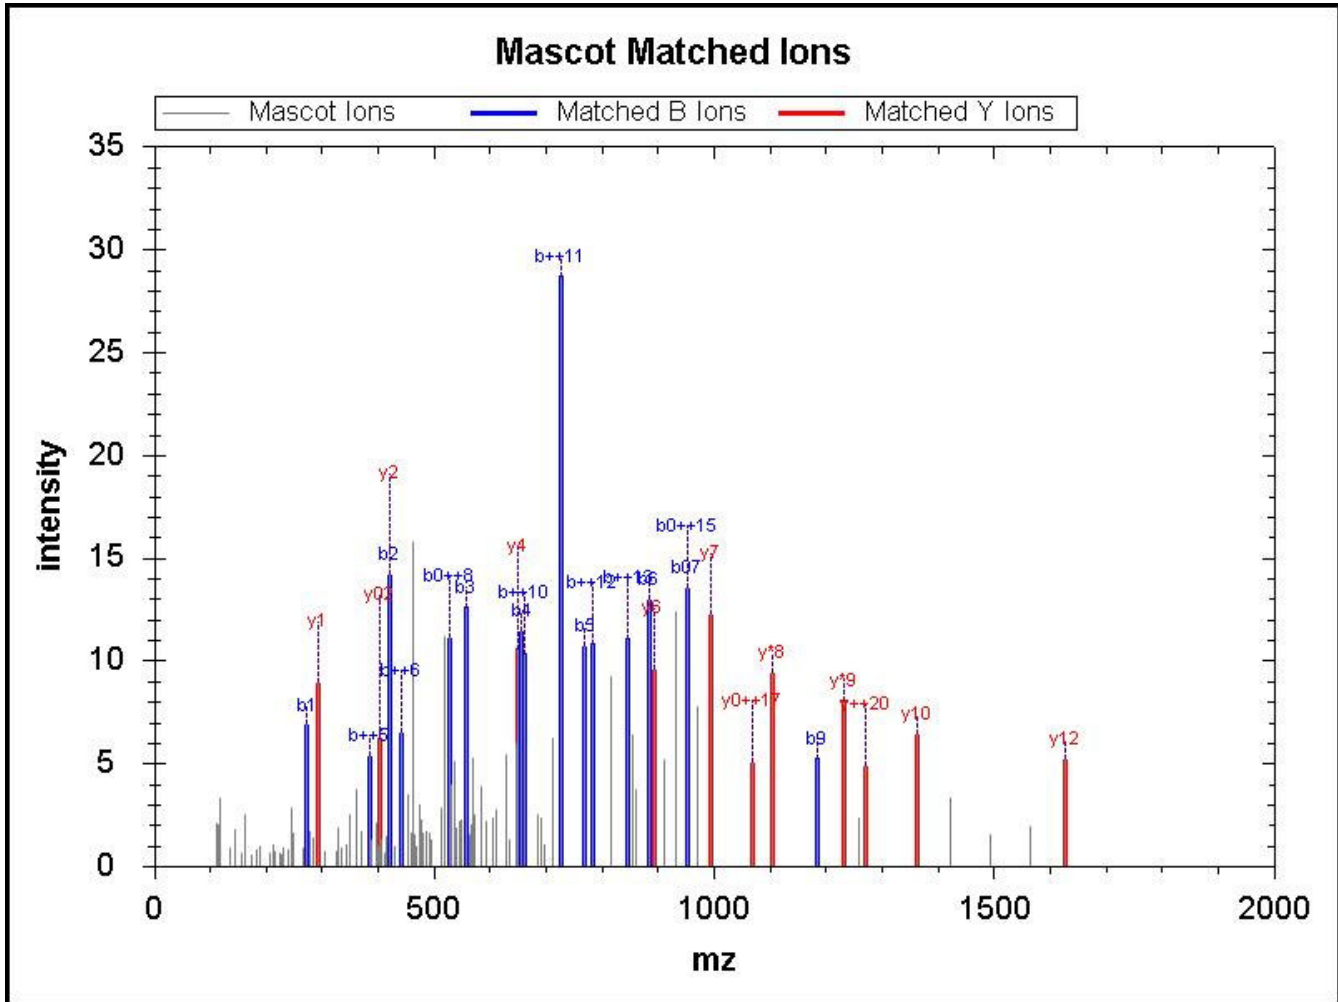

| No | b        | b++      | b*       | b*++     | b0       | b0++     | Seq | y        | y++      | y*       | y*++     | y0       | y0++     | RevNo |
|----|----------|----------|----------|----------|----------|----------|-----|----------|----------|----------|----------|----------|----------|-------|
| 1  | 273.17   | 137.09   | 256.14   | 128.57   |          |          | Q   |          |          |          |          |          |          | 21    |
| 2  | 420.24   | 210.62   | 403.21   | 202.11   |          |          | F   | 2,538.33 | 1,269.67 | 2,521.31 | 1,261.16 | 2,520.32 | 1,260.66 | 20    |
| 3  | 557.30   | 279.15   | 540.27   | 270.64   |          |          | H   | 2,391.26 | 1,196.14 | 2,374.24 | 1,187.62 | 2,373.25 | 1,187.13 | 19    |
| 4  | 656.36   | 328.69   | 639.34   | 320.17   |          |          | V   | 2,254.20 | 1,127.61 | 2,237.18 | 1,119.09 | 2,236.19 | 1,118.60 | 18    |
| 5  | 769.45   | 385.23   | 752.42   | 376.71   |          |          | L   | 2,155.14 | 1,078.07 | 2,138.11 | 1,069.56 | 2,137.13 | 1,069.07 | 17    |
| 6  | 882.53   | 441.77   | 865.51   | 433.26   |          |          | L   | 2,042.05 | 1,021.53 | 2,025.03 | 1,013.02 | 2,024.04 | 1,012.52 | 16    |
| 7  | 969.56   | 485.29   | 952.54   | 476.77   | 951.55   | 476.28   | S   | 1,928.97 | 964.99   | 1,911.94 | 956.47   | 1,910.96 | 955.98   | 15    |
| 8  | 1,070.61 | 535.81   | 1,053.59 | 527.30   | 1,052.60 | 526.80   | T   | 1,841.94 | 921.47   | 1,824.91 | 912.96   | 1,823.93 | 912.47   | 14    |
| 9  | 1,183.70 | 592.35   | 1,166.67 | 583.84   | 1,165.69 | 583.35   | I   | 1,740.89 | 870.95   | 1,723.86 | 862.43   | 1,722.88 | 861.94   | 13    |
| 10 | 1,320.75 | 660.88   | 1,303.73 | 652.37   | 1,302.74 | 651.88   | H   | 1,627.80 | 814.41   | 1,610.78 | 805.89   | 1,609.79 | 805.40   | 12    |
| 11 | 1,449.80 | 725.40   | 1,432.77 | 716.89   | 1,431.79 | 716.40   | E   | 1,490.75 | 745.88   | 1,473.72 | 737.36   | 1,472.73 | 736.87   | 11    |
| 12 | 1,562.88 | 781.94   | 1,545.85 | 773.43   | 1,544.87 | 772.94   | L   | 1,361.70 | 681.36   | 1,344.68 | 672.84   | 1,343.69 | 672.35   | 10    |
| 13 | 1,690.94 | 845.97   | 1,673.91 | 837.46   | 1,672.93 | 836.97   | Q   | 1,248.62 | 624.81   | 1,231.59 | 616.30   | 1,230.61 | 615.81   | 9     |
| 14 | 1,819.00 | 910.00   | 1,801.97 | 901.49   | 1,800.99 | 901.00   | Q   | 1,120.56 | 560.78   | 1,103.53 | 552.27   | 1,102.55 | 551.78   | 8     |
| 15 | 1,920.05 | 960.53   | 1,903.02 | 952.01   | 1,902.04 | 951.52   | T   | 992.50   | 496.75   | 975.48   | 488.24   | 974.49   | 487.75   | 7     |
| 16 | 2,033.13 | 1,017.07 | 2,016.10 | 1,008.56 | 2,015.12 | 1,008.06 | L   | 891.45   | 446.23   | 874.43   | 437.72   | 873.44   | 437.23   | 6     |

|    |          |          |          |          |          |          |   |        |        |        |        |        |        |   |
|----|----------|----------|----------|----------|----------|----------|---|--------|--------|--------|--------|--------|--------|---|
| 17 | 2,162.17 | 1,081.59 | 2,145.15 | 1,073.08 | 2,144.16 | 1,072.58 | E | 778.37 | 389.69 | 761.34 | 381.18 | 760.36 | 380.68 | 5 |
| 18 | 2,276.22 | 1,138.61 | 2,259.19 | 1,130.10 | 2,258.21 | 1,129.61 | N | 649.33 | 325.17 | 632.30 | 316.65 | 631.32 | 316.16 | 4 |
| 19 | 2,391.24 | 1,196.13 | 2,374.22 | 1,187.61 | 2,373.23 | 1,187.12 | D | 535.28 | 268.15 | 518.26 | 259.63 | 517.27 | 259.14 | 3 |
| 20 | 2,520.29 | 1,260.65 | 2,503.26 | 1,252.13 | 2,502.27 | 1,251.64 | E | 420.26 | 210.63 | 403.23 | 202.12 | 402.25 | 201.63 | 2 |
| 21 |          |          |          |          |          |          | K | 291.21 | 146.11 | 274.19 | 137.60 |        |        | 1 |

Query 25396 Hit 1

MS/MS Fragmentation of **LPFLVMIK**

Found in **sp|Q9Y6A4|CP080\_HUMAN**, UPF0468 protein C16orf80 OS=Homo sapiens GN=C16orf80 PE=1 SV=1

Match to Query 25396: 1360.876from(681.4454,2+)

Title: 1174: Scan 2610 (rt=68.1287, f=3, i=405) [D:\lab212\membrane\Grace\Joyce\iTRAQ\_27\_1.raw]

Data File:Submitted from 20120508-1(merge) by Mascot Daemon on JOYCE-VAIO

Monoisotopic mass of neutral peptide Mr(calc): 1360.876

Variable modifications:

K9 iTRAQ4plex (K)

Ions Score: 54.89 Expect: 0.001

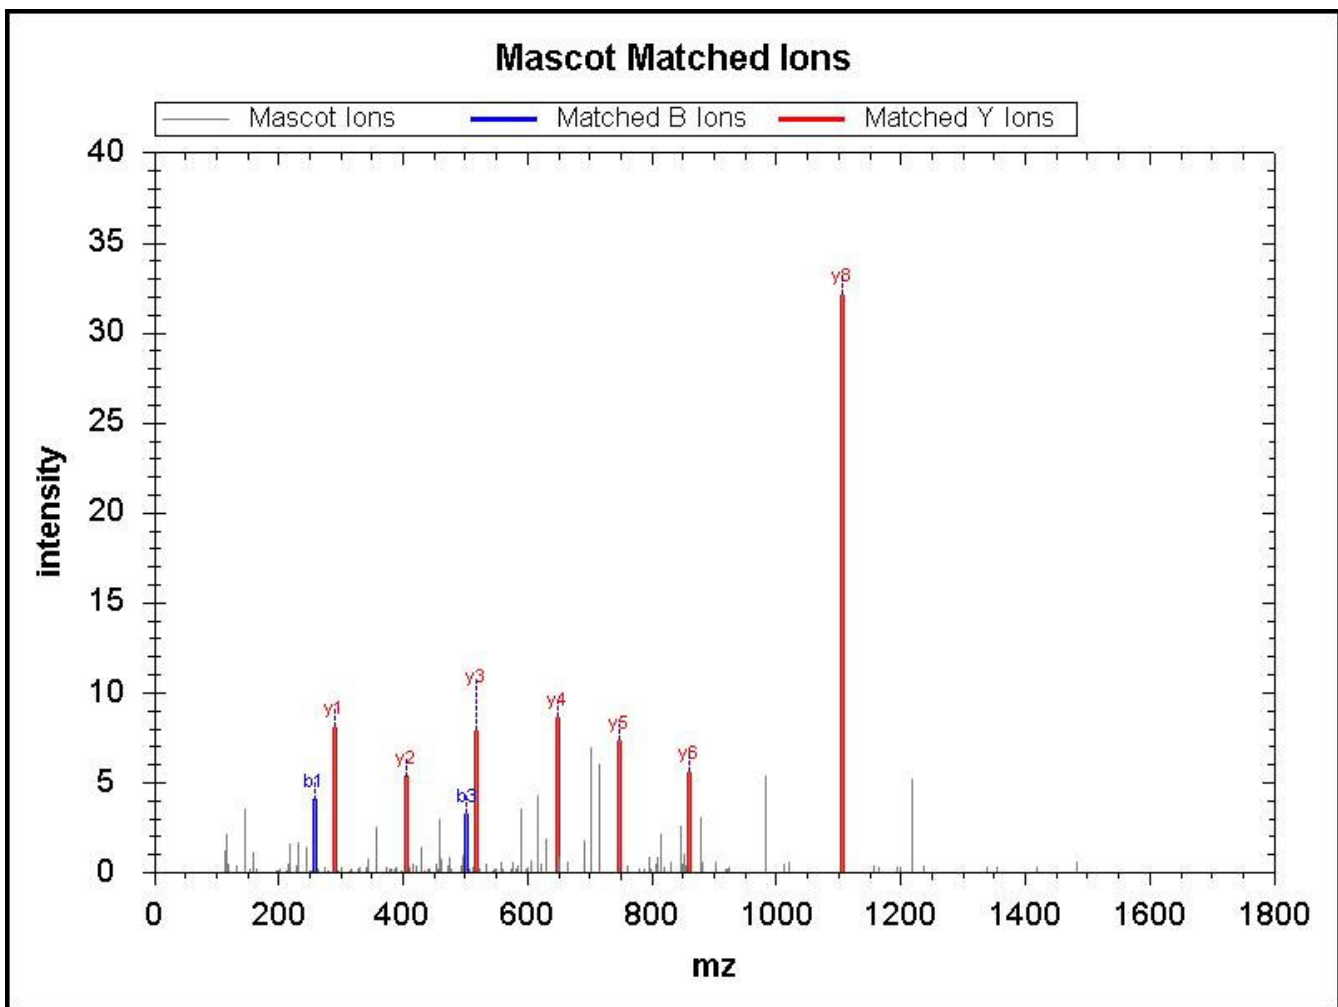

| No | b        | b++    | Seq | y        | y++    | y*       | y*++   | RevNo |
|----|----------|--------|-----|----------|--------|----------|--------|-------|
| 1  | 258.19   | 129.60 | L   |          |        |          |        | 9     |
| 2  | 355.25   | 178.13 | P   | 1,104.70 | 552.85 | 1,087.67 | 544.34 | 8     |
| 3  | 502.31   | 251.66 | F   | 1,007.64 | 504.33 | 990.62   | 495.81 | 7     |
| 4  | 615.40   | 308.20 | L   | 860.58   | 430.79 | 843.55   | 422.28 | 6     |
| 5  | 714.47   | 357.74 | V   | 747.49   | 374.25 | 730.47   | 365.74 | 5     |
| 6  | 845.51   | 423.26 | M   | 648.42   | 324.72 | 631.40   | 316.20 | 4     |
| 7  | 958.59   | 479.80 | I   | 517.38   | 259.20 | 500.36   | 250.68 | 3     |
| 8  | 1,071.68 | 536.34 | I   | 404.30   | 202.65 | 387.27   | 194.14 | 2     |
| 9  |          |        | K   | 291.21   | 146.11 | 274.19   | 137.60 | 1     |

MS/MS Fragmentation of **SGPPGEEAQVASQFIADVIENSQIIQK**

Found in **sp|Q96B26|EXOS8\_HUMAN**, Exosome complex component RRP43 OS=Homo sapiens GN=EXOSC8 PE=1 SV=1

Match to Query 93589: 3142.636from(786.6663,4+)

Title: 1260: Sum of 2 scans in range 2873 (rt=73.5336, f=4, i=829) to 2874 (rt=73.559, f=4, i=830)

[D:\lab212\membrane\GraceJoyce\iTRAQ\_24\_1.raw]

Data File:Submitted from 20120508-1(merge) by Mascot Daemon on JOYCE-VAIO

Monoisotopic mass of neutral peptide Mr(calc): 3142.636

Variable modifications:

K27 iTRAQ4plex (K)

Ions Score: 54.34 Expect: 0.003

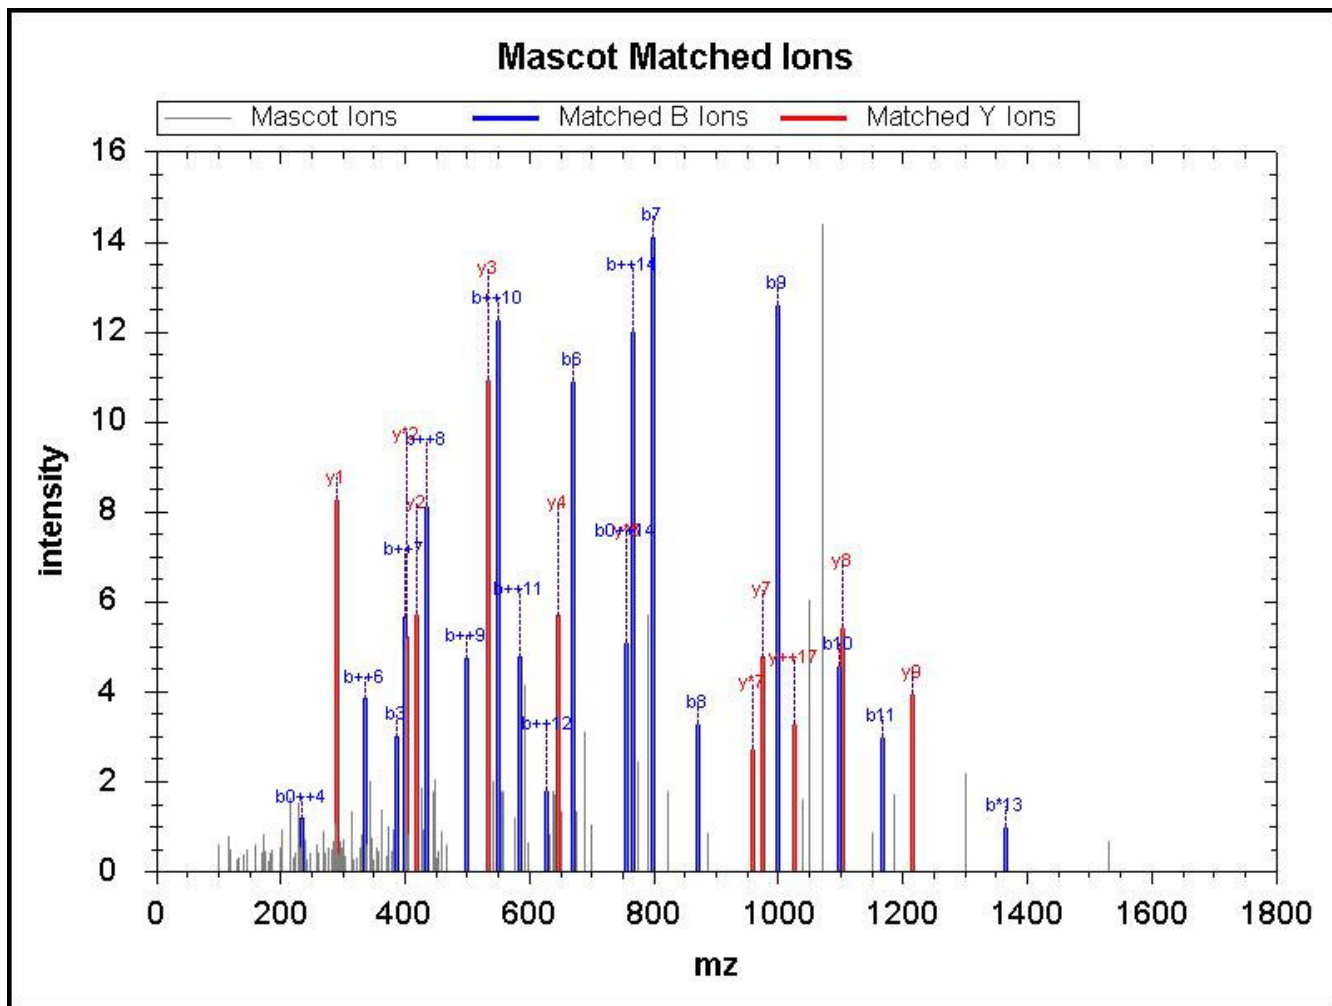

| No | b               | b++           | b*              | b*++   | b0       | b0++          | Seq | y        | y++             | y*       | y*++     | y0       | y0++     | RevNo |
|----|-----------------|---------------|-----------------|--------|----------|---------------|-----|----------|-----------------|----------|----------|----------|----------|-------|
| 1  | 232.14          | 116.57        |                 |        | 214.13   | 107.57        | S   |          |                 |          |          |          |          | 27    |
| 2  | 289.16          | 145.09        |                 |        | 271.15   | 136.08        | G   | 2,912.51 | 1,456.76        | 2,895.49 | 1,448.25 | 2,894.50 | 1,447.75 | 26    |
| 3  | <b>386.22</b>   | 193.61        |                 |        | 368.21   | 184.61        | P   | 2,855.49 | 1,428.25        | 2,838.46 | 1,419.74 | 2,837.48 | 1,419.24 | 25    |
| 4  | 483.27          | 242.14        |                 |        | 465.26   | <b>233.13</b> | P   | 2,758.44 | 1,379.72        | 2,741.41 | 1,371.21 | 2,740.43 | 1,370.72 | 24    |
| 5  | 540.29          | 270.65        |                 |        | 522.28   | 261.64        | G   | 2,661.39 | 1,331.20        | 2,644.36 | 1,322.68 | 2,643.37 | 1,322.19 | 23    |
| 6  | <b>669.33</b>   | <b>335.17</b> |                 |        | 651.32   | 326.16        | E   | 2,604.36 | 1,302.69        | 2,587.34 | 1,294.17 | 2,586.35 | 1,293.68 | 22    |
| 7  | <b>798.38</b>   | <b>399.69</b> |                 |        | 780.36   | 390.69        | E   | 2,475.32 | 1,238.16        | 2,458.29 | 1,229.65 | 2,457.31 | 1,229.16 | 21    |
| 8  | <b>869.41</b>   | <b>435.21</b> |                 |        | 851.40   | 426.20        | A   | 2,346.28 | 1,173.64        | 2,329.25 | 1,165.13 | 2,328.27 | 1,164.64 | 20    |
| 9  | <b>997.47</b>   | <b>499.24</b> | 980.44          | 490.73 | 979.46   | 490.23        | Q   | 2,275.24 | 1,138.12        | 2,258.21 | 1,129.61 | 2,257.23 | 1,129.12 | 19    |
| 10 | <b>1,096.54</b> | <b>548.77</b> | 1,079.51        | 540.26 | 1,078.53 | 539.77        | V   | 2,147.18 | 1,074.10        | 2,130.16 | 1,065.58 | 2,129.17 | 1,065.09 | 18    |
| 11 | <b>1,167.58</b> | <b>584.29</b> | 1,150.55        | 575.78 | 1,149.57 | 575.29        | A   | 2,048.11 | <b>1,024.56</b> | 2,031.09 | 1,016.05 | 2,030.10 | 1,015.56 | 17    |
| 12 | 1,254.61        | <b>627.81</b> | 1,237.58        | 619.29 | 1,236.60 | 618.80        | S   | 1,977.08 | 989.04          | 1,960.05 | 980.53   | 1,959.07 | 980.04   | 16    |
| 13 | 1,382.67        | 691.84        | <b>1,365.64</b> | 683.32 | 1,364.66 | 682.83        | Q   | 1,890.05 | 945.53          | 1,873.02 | 937.01   | 1,872.03 | 936.52   | 15    |
| 14 | 1,529.74        | <b>765.37</b> | 1,512.71        | 756.86 | 1,511.72 | <b>756.37</b> | F   | 1,761.99 | 881.50          | 1,744.96 | 872.98   | 1,743.98 | 872.49   | 14    |

|    |          |          |          |          |          |          |   |          |        |          |        |          |        |    |
|----|----------|----------|----------|----------|----------|----------|---|----------|--------|----------|--------|----------|--------|----|
| 15 | 1,642.82 | 821.91   | 1,625.79 | 813.40   | 1,624.81 | 812.91   | I | 1,614.92 | 807.96 | 1,597.89 | 799.45 | 1,596.91 | 798.96 | 13 |
| 16 | 1,713.86 | 857.43   | 1,696.83 | 848.92   | 1,695.85 | 848.43   | A | 1,501.83 | 751.42 | 1,484.81 | 742.91 | 1,483.82 | 742.42 | 12 |
| 17 | 1,828.88 | 914.95   | 1,811.86 | 906.43   | 1,810.87 | 905.94   | D | 1,430.80 | 715.90 | 1,413.77 | 707.39 | 1,412.79 | 706.90 | 11 |
| 18 | 1,927.95 | 964.48   | 1,910.93 | 955.97   | 1,909.94 | 955.47   | V | 1,315.77 | 658.39 | 1,298.74 | 649.88 | 1,297.76 | 649.38 | 10 |
| 19 | 2,041.04 | 1,021.02 | 2,024.01 | 1,012.51 | 2,023.03 | 1,012.02 | I | 1,216.70 | 608.85 | 1,199.68 | 600.34 | 1,198.69 | 599.85 | 9  |
| 20 | 2,170.08 | 1,085.54 | 2,153.05 | 1,077.03 | 2,152.07 | 1,076.54 | E | 1,103.62 | 552.31 | 1,086.59 | 543.80 | 1,085.61 | 543.31 | 8  |
| 21 | 2,284.12 | 1,142.56 | 2,267.09 | 1,134.05 | 2,266.11 | 1,133.56 | N | 974.58   | 487.79 | 957.55   | 479.28 | 956.56   | 478.79 | 7  |
| 22 | 2,371.15 | 1,186.08 | 2,354.13 | 1,177.57 | 2,353.14 | 1,177.08 | S | 860.53   | 430.77 | 843.51   | 422.26 | 842.52   | 421.76 | 6  |
| 23 | 2,499.21 | 1,250.11 | 2,482.19 | 1,241.60 | 2,481.20 | 1,241.10 | Q | 773.50   | 387.25 | 756.47   | 378.74 |          |        | 5  |
| 24 | 2,612.30 | 1,306.65 | 2,595.27 | 1,298.14 | 2,594.29 | 1,297.65 | I | 645.44   | 323.22 | 628.41   | 314.71 |          |        | 4  |
| 25 | 2,725.38 | 1,363.19 | 2,708.35 | 1,354.68 | 2,707.37 | 1,354.19 | I | 532.36   | 266.68 | 515.33   | 258.17 |          |        | 3  |
| 26 | 2,853.44 | 1,427.22 | 2,836.41 | 1,418.71 | 2,835.43 | 1,418.22 | Q | 419.27   | 210.14 | 402.25   | 201.63 |          |        | 2  |
| 27 |          |          |          |          |          |          | K | 291.21   | 146.11 | 274.19   | 137.60 |          |        | 1  |

Query 65226 Hit 1

MS/MS Fragmentation of **LLQAGEENQVLELLIHR**

Found in **sp|Q9NPJ6|MED4\_HUMAN**, Mediator of RNA polymerase II transcription subunit 4 OS=Homo sapiens GN=MED4 PE=1 SV=1

Match to Query 65226: 2118.19 from (707.0705, 3+)

Title: 980: Scan 2176 (rt=58.4401, f=3, i=336) [D:\lab212\membrane\Grace\Joyce\iTRAQ\_32\_2.raw]

Data File: Submitted from 20120508-1(merge) by Mascot Daemon on JOYCE-VAIO

Monoisotopic mass of neutral peptide Mr(calc): 2118.19

Variable modifications:

Ions Score: 54.3 Expect: 0.002

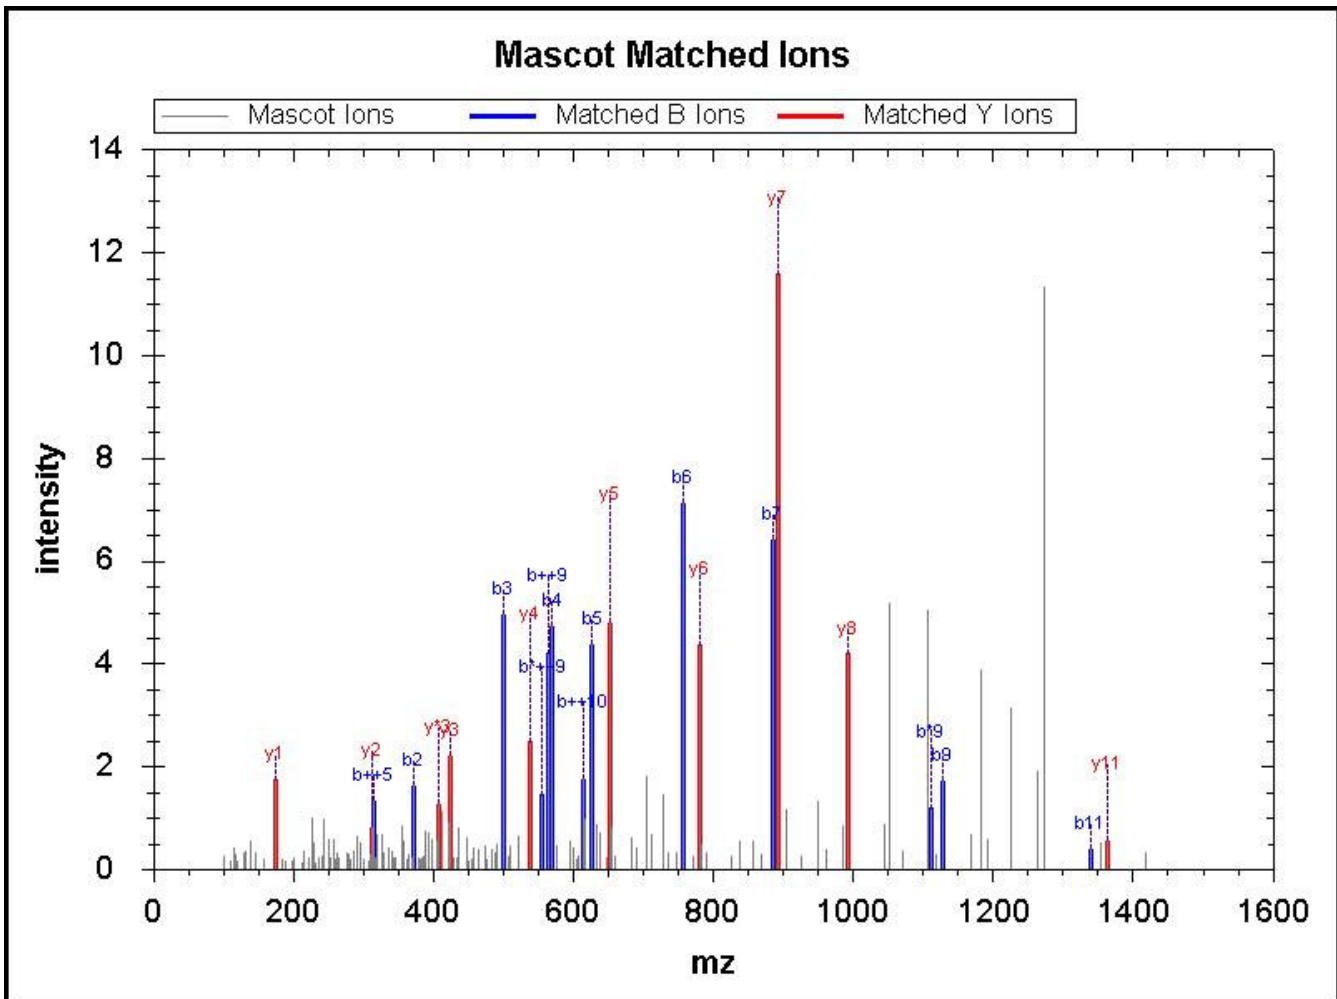

| No | b      | b++    | b* | b*++ | b0 | b0++ | Seq | y | y++ | y* | y*++ | y0 | y0++ | RevNo |
|----|--------|--------|----|------|----|------|-----|---|-----|----|------|----|------|-------|
| 1  | 258.19 | 129.60 |    |      |    |      | L   |   |     |    |      |    |      | 17    |

|    |          |        |          |        |          |        |   |          |        |          |        |          |        |    |
|----|----------|--------|----------|--------|----------|--------|---|----------|--------|----------|--------|----------|--------|----|
| 2  | 371.28   | 186.14 |          |        |          |        | L | 1,862.01 | 931.51 | 1,844.99 | 923.00 | 1,844.00 | 922.50 | 16 |
| 3  | 499.34   | 250.17 | 482.31   | 241.66 |          |        | Q | 1,748.93 | 874.97 | 1,731.90 | 866.45 | 1,730.92 | 865.96 | 15 |
| 4  | 570.37   | 285.69 | 553.35   | 277.18 |          |        | A | 1,620.87 | 810.94 | 1,603.84 | 802.43 | 1,602.86 | 801.93 | 14 |
| 5  | 627.39   | 314.20 | 610.37   | 305.69 |          |        | G | 1,549.83 | 775.42 | 1,532.81 | 766.91 | 1,531.82 | 766.41 | 13 |
| 6  | 756.44   | 378.72 | 739.41   | 370.21 | 738.43   | 369.72 | E | 1,492.81 | 746.91 | 1,475.79 | 738.40 | 1,474.80 | 737.90 | 12 |
| 7  | 885.48   | 443.24 | 868.45   | 434.73 | 867.47   | 434.24 | E | 1,363.77 | 682.39 | 1,346.74 | 673.88 | 1,345.76 | 673.38 | 11 |
| 8  | 999.52   | 500.27 | 982.50   | 491.75 | 981.51   | 491.26 | N | 1,234.73 | 617.87 | 1,217.70 | 609.35 | 1,216.72 | 608.86 | 10 |
| 9  | 1,127.58 | 564.29 | 1,110.55 | 555.78 | 1,109.57 | 555.29 | Q | 1,120.68 | 560.85 | 1,103.66 | 552.33 | 1,102.67 | 551.84 | 9  |
| 10 | 1,226.65 | 613.83 | 1,209.62 | 605.32 | 1,208.64 | 604.82 | V | 992.63   | 496.82 | 975.60   | 488.30 | 974.61   | 487.81 | 8  |
| 11 | 1,339.73 | 670.37 | 1,322.71 | 661.86 | 1,321.72 | 661.37 | L | 893.56   | 447.28 | 876.53   | 438.77 | 875.55   | 438.28 | 7  |
| 12 | 1,468.78 | 734.89 | 1,451.75 | 726.38 | 1,450.77 | 725.89 | E | 780.47   | 390.74 | 763.45   | 382.23 | 762.46   | 381.73 | 6  |
| 13 | 1,581.86 | 791.43 | 1,564.83 | 782.92 | 1,563.85 | 782.43 | L | 651.43   | 326.22 | 634.40   | 317.71 |          |        | 5  |
| 14 | 1,694.94 | 847.98 | 1,677.92 | 839.46 | 1,676.93 | 838.97 | L | 538.35   | 269.68 | 521.32   | 261.16 |          |        | 4  |
| 15 | 1,808.03 | 904.52 | 1,791.00 | 896.00 | 1,790.02 | 895.51 | I | 425.26   | 213.13 | 408.24   | 204.62 |          |        | 3  |
| 16 | 1,945.09 | 973.05 | 1,928.06 | 964.53 | 1,927.08 | 964.04 | H | 312.18   | 156.59 | 295.15   | 148.08 |          |        | 2  |
| 17 |          |        |          |        |          |        | R | 175.12   | 88.06  | 158.09   | 79.55  |          |        | 1  |

Query 73704 Hit 1

MS/MS Fragmentation of **DLIPIIAALEYNQWFTK**

Found in **sp|Q5VZK9|LR16A\_HUMAN**, Leucine-rich repeat-containing protein 16A OS=Homo sapiens GN=LRR16A PE=1 SV=1

Match to Query 73704: 2322.286 from (775.1025,3+)

Title: 1356: Scan 3013 (rt=77.2001, f=3, i=470) [D:\lab212\membrane\Grace\Joyce\iTRAQ\_25\_2.raw]

Data File: Submitted from 20120508-1 (merge) by Mascot Daemon on JOYCE-VAIO

Monoisotopic mass of neutral peptide Mr(calc): 2322.286

Variable modifications:

K17 iTRAQ4plex (K)

Ions Score: 53.99 Expect: 0.002

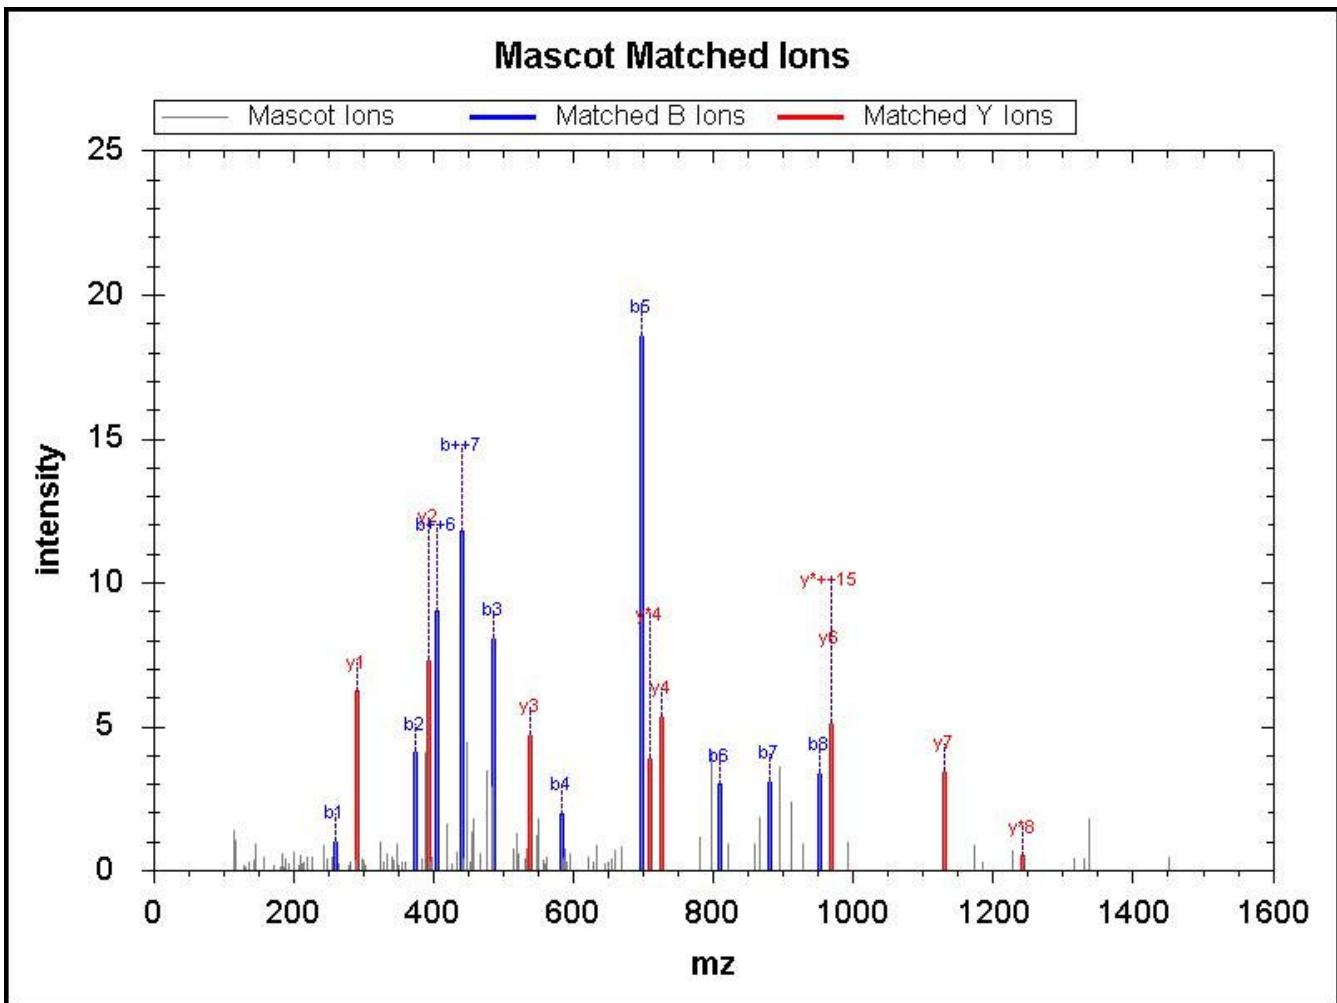

| No | b        | b++      | b*       | b*++     | b0       | b0++     | Seq | y        | y++      | y*       | y*++     | y0       | y0++     | RevNo |
|----|----------|----------|----------|----------|----------|----------|-----|----------|----------|----------|----------|----------|----------|-------|
| 1  | 260.14   | 130.57   |          |          | 242.13   | 121.57   | D   |          |          |          |          |          |          | 17    |
| 2  | 373.22   | 187.11   |          |          | 355.21   | 178.11   | L   | 2,064.17 | 1,032.59 | 2,047.14 | 1,024.07 | 2,046.15 | 1,023.58 | 16    |
| 3  | 486.30   | 243.66   |          |          | 468.29   | 234.65   | I   | 1,951.08 | 976.04   | 1,934.05 | 967.53   | 1,933.07 | 967.04   | 15    |
| 4  | 583.36   | 292.18   |          |          | 565.35   | 283.18   | P   | 1,838.00 | 919.50   | 1,820.97 | 910.99   | 1,819.99 | 910.50   | 14    |
| 5  | 696.44   | 348.72   |          |          | 678.43   | 339.72   | I   | 1,740.94 | 870.98   | 1,723.92 | 862.46   | 1,722.93 | 861.97   | 13    |
| 6  | 809.53   | 405.27   |          |          | 791.51   | 396.26   | I   | 1,627.86 | 814.43   | 1,610.83 | 805.92   | 1,609.85 | 805.43   | 12    |
| 7  | 880.56   | 440.78   |          |          | 862.55   | 431.78   | A   | 1,514.78 | 757.89   | 1,497.75 | 749.38   | 1,496.77 | 748.89   | 11    |
| 8  | 951.60   | 476.30   |          |          | 933.59   | 467.30   | A   | 1,443.74 | 722.37   | 1,426.71 | 713.86   | 1,425.73 | 713.37   | 10    |
| 9  | 1,064.68 | 532.85   |          |          | 1,046.67 | 523.84   | L   | 1,372.70 | 686.85   | 1,355.68 | 678.34   | 1,354.69 | 677.85   | 9     |
| 10 | 1,193.73 | 597.37   |          |          | 1,175.72 | 588.36   | E   | 1,259.62 | 630.31   | 1,242.59 | 621.80   | 1,241.61 | 621.31   | 8     |
| 11 | 1,356.79 | 678.90   |          |          | 1,338.78 | 669.89   | Y   | 1,130.58 | 565.79   | 1,113.55 | 557.28   | 1,112.56 | 556.79   | 7     |
| 12 | 1,470.83 | 735.92   | 1,453.81 | 727.41   | 1,452.82 | 726.91   | N   | 967.51   | 484.26   | 950.49   | 475.75   | 949.50   | 475.25   | 6     |
| 13 | 1,598.89 | 799.95   | 1,581.86 | 791.44   | 1,580.88 | 790.94   | Q   | 853.47   | 427.24   | 836.44   | 418.72   | 835.46   | 418.23   | 5     |
| 14 | 1,784.97 | 892.99   | 1,767.94 | 884.48   | 1,766.96 | 883.98   | W   | 725.41   | 363.21   | 708.38   | 354.70   | 707.40   | 354.20   | 4     |
| 15 | 1,932.04 | 966.52   | 1,915.01 | 958.01   | 1,914.03 | 957.52   | F   | 539.33   | 270.17   | 522.30   | 261.66   | 521.32   | 261.16   | 3     |
| 16 | 2,033.09 | 1,017.05 | 2,016.06 | 1,008.53 | 2,015.08 | 1,008.04 | T   | 392.26   | 196.63   | 375.24   | 188.12   | 374.25   | 187.63   | 2     |
| 17 |          |          |          |          |          |          | K   | 291.21   | 146.11   | 274.19   | 137.60   |          |          | 1     |

Query 32394 Hit 1

MS/MS Fragmentation of **AAEEEDPADPK**

Found in [sp|P20962|PTMS\\_HUMAN](#), Parathymosin OS=Homo sapiens GN=PTMS PE=1 SV=2

Match to Query 32394: 1490.701 from(746.3575,2+)

Title: 29: Sum of 2 scans in range 224 (rt=14.1917, f=3, i=10) to 225 (rt=14.2171, f=3, i=11)

[D:\lab212\membrane\GraceJoyce\iTRAQ\_30\_2.raw]

Data File: Submitted from 20120508-1(merge) by Mascot Daemon on JOYCE-VAIO

Monoisotopic mass of neutral peptide Mr(calc): 1490.701

Variable modifications:

K11 iTRAQ4plex (K)

Ions Score: 53.97 Expect: 0.002

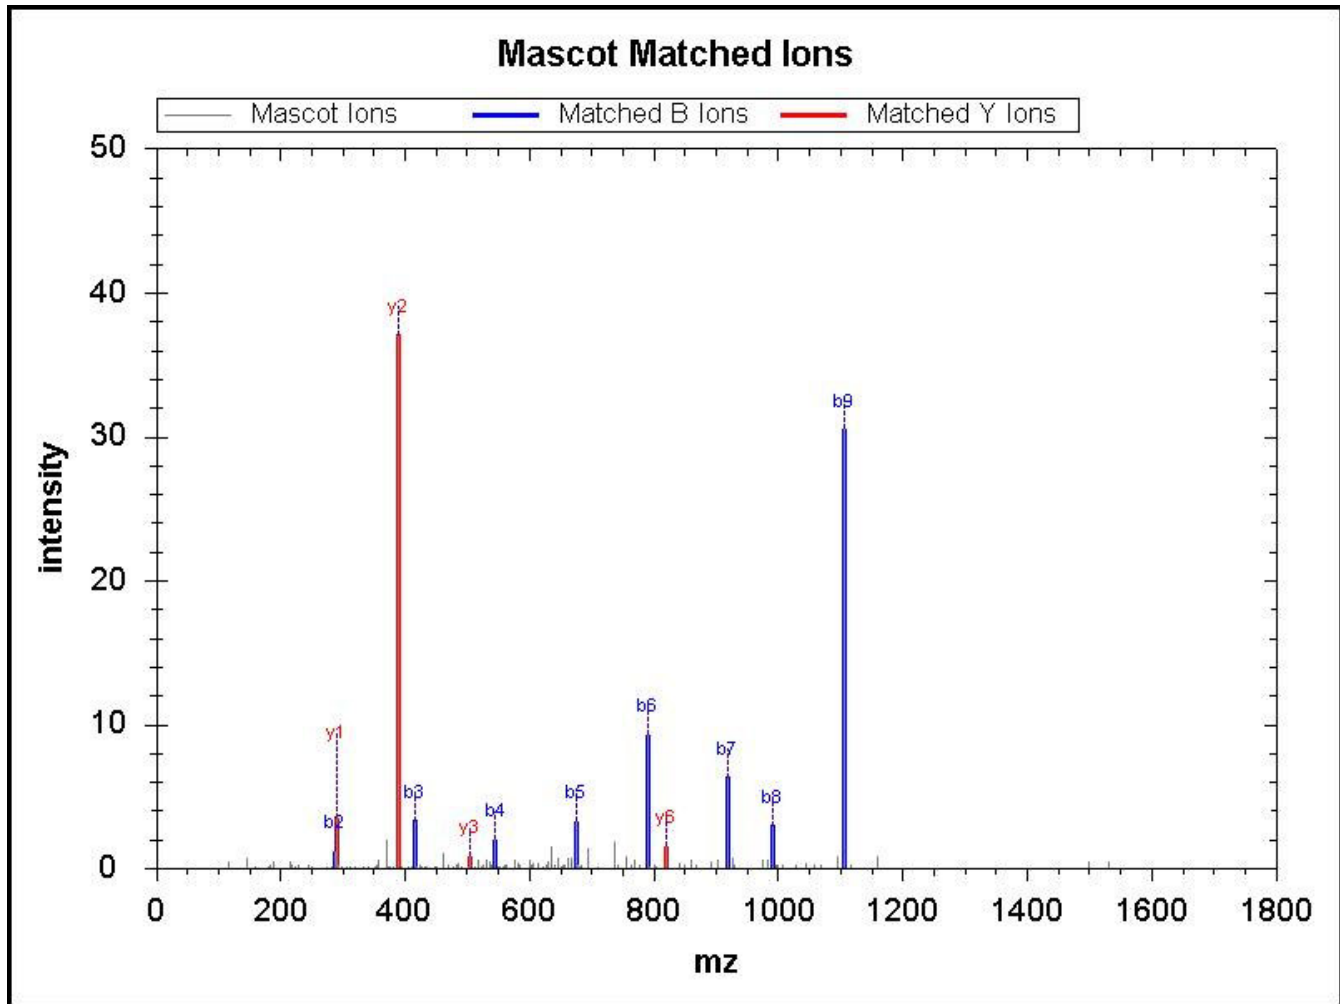

| No | b        | b++    | b0       | b0++   | Seq | y        | y++    | y*       | y*++   | y0       | y0++   | RevNo |
|----|----------|--------|----------|--------|-----|----------|--------|----------|--------|----------|--------|-------|
| 1  | 216.15   | 108.58 |          |        | A   |          |        |          |        |          |        | 11    |
| 2  | 287.18   | 144.10 |          |        | A   | 1,276.57 | 638.79 | 1,259.54 | 630.27 | 1,258.56 | 629.78 | 10    |
| 3  | 416.23   | 208.62 | 398.22   | 199.61 | E   | 1,205.53 | 603.27 | 1,188.50 | 594.75 | 1,187.52 | 594.26 | 9     |
| 4  | 545.27   | 273.14 | 527.26   | 264.13 | E   | 1,076.49 | 538.75 | 1,059.46 | 530.23 | 1,058.48 | 529.74 | 8     |
| 5  | 674.31   | 337.66 | 656.30   | 328.65 | E   | 947.44   | 474.23 | 930.42   | 465.71 | 929.43   | 465.22 | 7     |
| 6  | 789.34   | 395.17 | 771.33   | 386.17 | D   | 818.40   | 409.70 | 801.37   | 401.19 | 800.39   | 400.70 | 6     |
| 7  | 918.38   | 459.69 | 900.37   | 450.69 | E   | 703.37   | 352.19 | 686.35   | 343.68 | 685.36   | 343.19 | 5     |
| 8  | 989.42   | 495.21 | 971.41   | 486.21 | A   | 574.33   | 287.67 | 557.31   | 279.16 | 556.32   | 278.66 | 4     |
| 9  | 1,104.44 | 552.73 | 1,086.43 | 543.72 | D   | 503.29   | 252.15 | 486.27   | 243.64 | 485.28   | 243.15 | 3     |
| 10 | 1,201.50 | 601.25 | 1,183.49 | 592.25 | P   | 388.27   | 194.64 | 371.24   | 186.12 |          |        | 2     |
| 11 |          |        |          |        | K   | 291.21   | 146.11 | 274.19   | 137.60 |          |        | 1     |

Query 52177 Hit 1

MS/MS Fragmentation of **DIPVTIHNLEEYLR**

Found in **sp|Q14669|TRIPC\_HUMAN**, Probable E3 ubiquitin-protein ligase TRIP12 OS=Homo sapiens GN=TRIP12 PE=1 SV=1

Match to Query 52177: 1854.992from(619.3381,3+)

Title: 832: Sum of 2 scans in range 2033 (rt=54.2633, f=4, i=553) to 2034 (rt=54.2887, f=4, i=554)

[D:\lab212\membrane\GraceJoyce\iTRAQ\_34\_1.raw]

Data File:Submitted from 20120508-1(merge) by Mascot Daemon on JOYCE-VAIO

Monoisotopic mass of neutral peptide Mr(calc): 1854.992

Variable modifications:

Ions Score: 53.92 Expect: 0.003



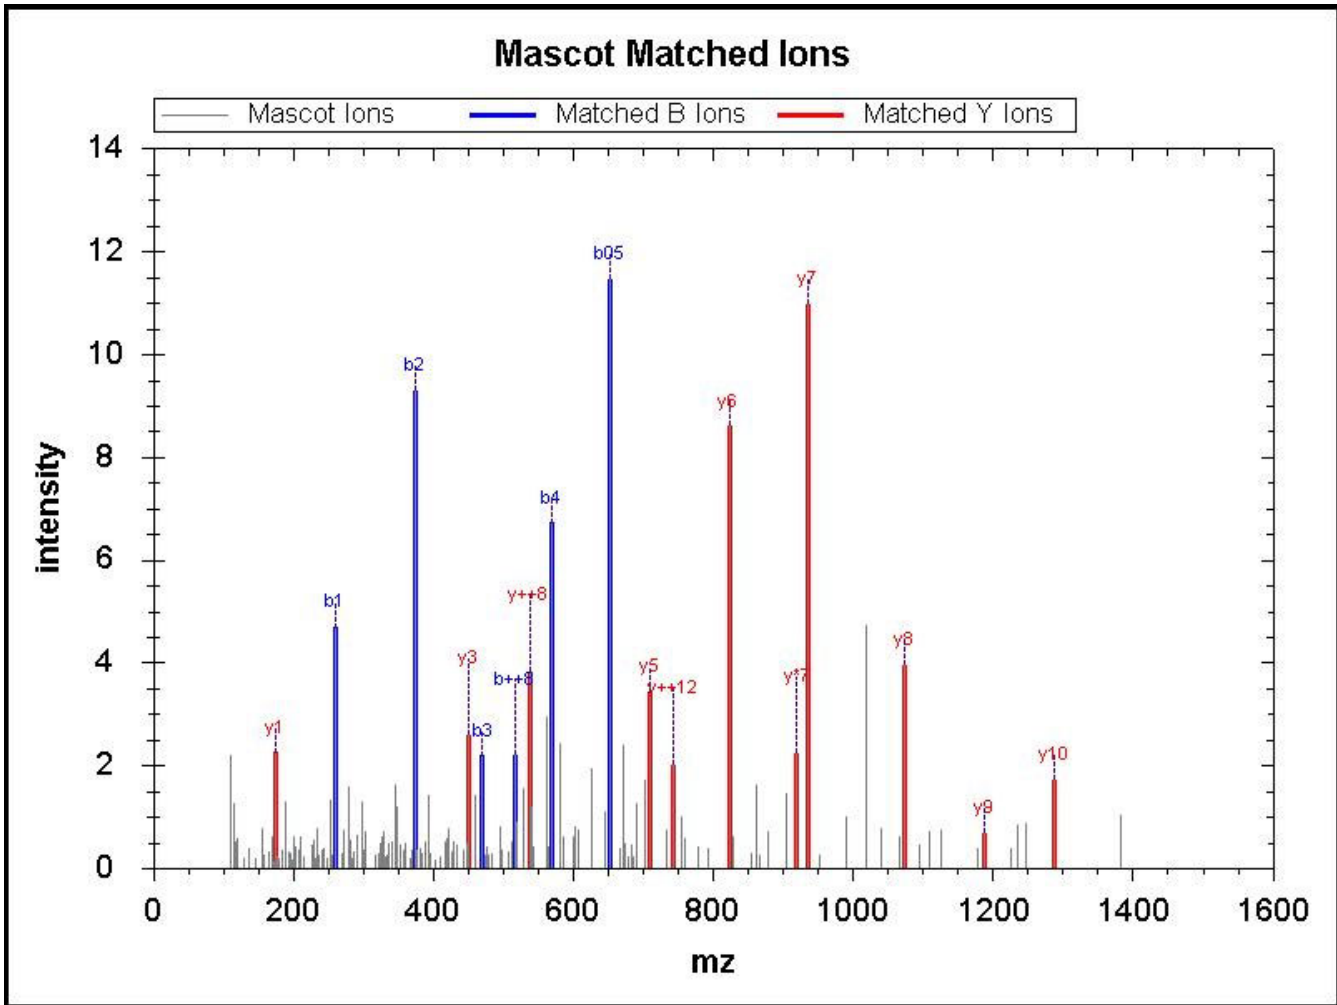

| No | b        | b++    | b*       | b*++   | b0       | b0++   | Seq | y        | y++    | y*       | y*++   | y0       | y0++   | RevNo |
|----|----------|--------|----------|--------|----------|--------|-----|----------|--------|----------|--------|----------|--------|-------|
| 1  | 260.14   | 130.57 |          |        | 242.13   | 121.57 | D   |          |        |          |        |          |        | 14    |
| 2  | 373.22   | 187.11 |          |        | 355.21   | 178.11 | I   | 1,596.87 | 798.94 | 1,579.85 | 790.43 | 1,578.86 | 789.94 | 13    |
| 3  | 470.27   | 235.64 |          |        | 452.26   | 226.63 | P   | 1,483.79 | 742.40 | 1,466.76 | 733.89 | 1,465.78 | 733.39 | 12    |
| 4  | 569.34   | 285.17 |          |        | 551.33   | 276.17 | V   | 1,386.74 | 693.87 | 1,369.71 | 685.36 | 1,368.73 | 684.87 | 11    |
| 5  | 670.39   | 335.70 |          |        | 652.38   | 326.69 | T   | 1,287.67 | 644.34 | 1,270.64 | 635.83 | 1,269.66 | 635.33 | 10    |
| 6  | 783.47   | 392.24 |          |        | 765.46   | 383.23 | I   | 1,186.62 | 593.81 | 1,169.59 | 585.30 | 1,168.61 | 584.81 | 9     |
| 7  | 920.53   | 460.77 |          |        | 902.52   | 451.76 | H   | 1,073.54 | 537.27 | 1,056.51 | 528.76 | 1,055.53 | 528.27 | 8     |
| 8  | 1,034.58 | 517.79 | 1,017.55 | 509.28 | 1,016.56 | 508.79 | N   | 936.48   | 468.74 | 919.45   | 460.23 | 918.47   | 459.74 | 7     |
| 9  | 1,147.66 | 574.33 | 1,130.63 | 565.82 | 1,129.65 | 565.33 | L   | 822.44   | 411.72 | 805.41   | 403.21 | 804.42   | 402.72 | 6     |
| 10 | 1,276.70 | 638.85 | 1,259.68 | 630.34 | 1,258.69 | 629.85 | E   | 709.35   | 355.18 | 692.32   | 346.67 | 691.34   | 346.17 | 5     |
| 11 | 1,405.74 | 703.38 | 1,388.72 | 694.86 | 1,387.73 | 694.37 | E   | 580.31   | 290.66 | 563.28   | 282.14 | 562.30   | 281.65 | 4     |
| 12 | 1,568.81 | 784.91 | 1,551.78 | 776.39 | 1,550.80 | 775.90 | Y   | 451.27   | 226.14 | 434.24   | 217.62 |          |        | 3     |
| 13 | 1,681.89 | 841.45 | 1,664.87 | 832.94 | 1,663.88 | 832.44 | L   | 288.20   | 144.61 | 271.18   | 136.09 |          |        | 2     |
| 14 |          |        |          |        |          |        | R   | 175.12   | 88.06  | 158.09   | 79.55  |          |        | 1     |

Query 34582 Hit 1

MS/MS Fragmentation of **TIEYLQPNPASR**  
 Found in **sp|Q99961|SH3G1\_HUMAN**, Endophilin-A2 OS=Homo sapiens GN=SH3GL1 PE=1 SV=1  
 Match to Query 34582: 1531.809from(766.9116,2+)  
 Title: 379: Sum of 2 scans in range 1057 (rt=32.8761, f=4, i=241) to 1058 (rt=32.9015, f=4, i=242)  
 [D:\lab212\membrane\GraceJoyce\iTRAQ\_21\_1.raw]  
 Data File: Submitted from 20120508-1(merge) by Mascot Daemon on JOYCE-VAIO  
 Monoisotopic mass of neutral peptide Mr(calc): 1531.809  
 Variable modifications:  
 Ions Score: 53.9 Expect: 0.004

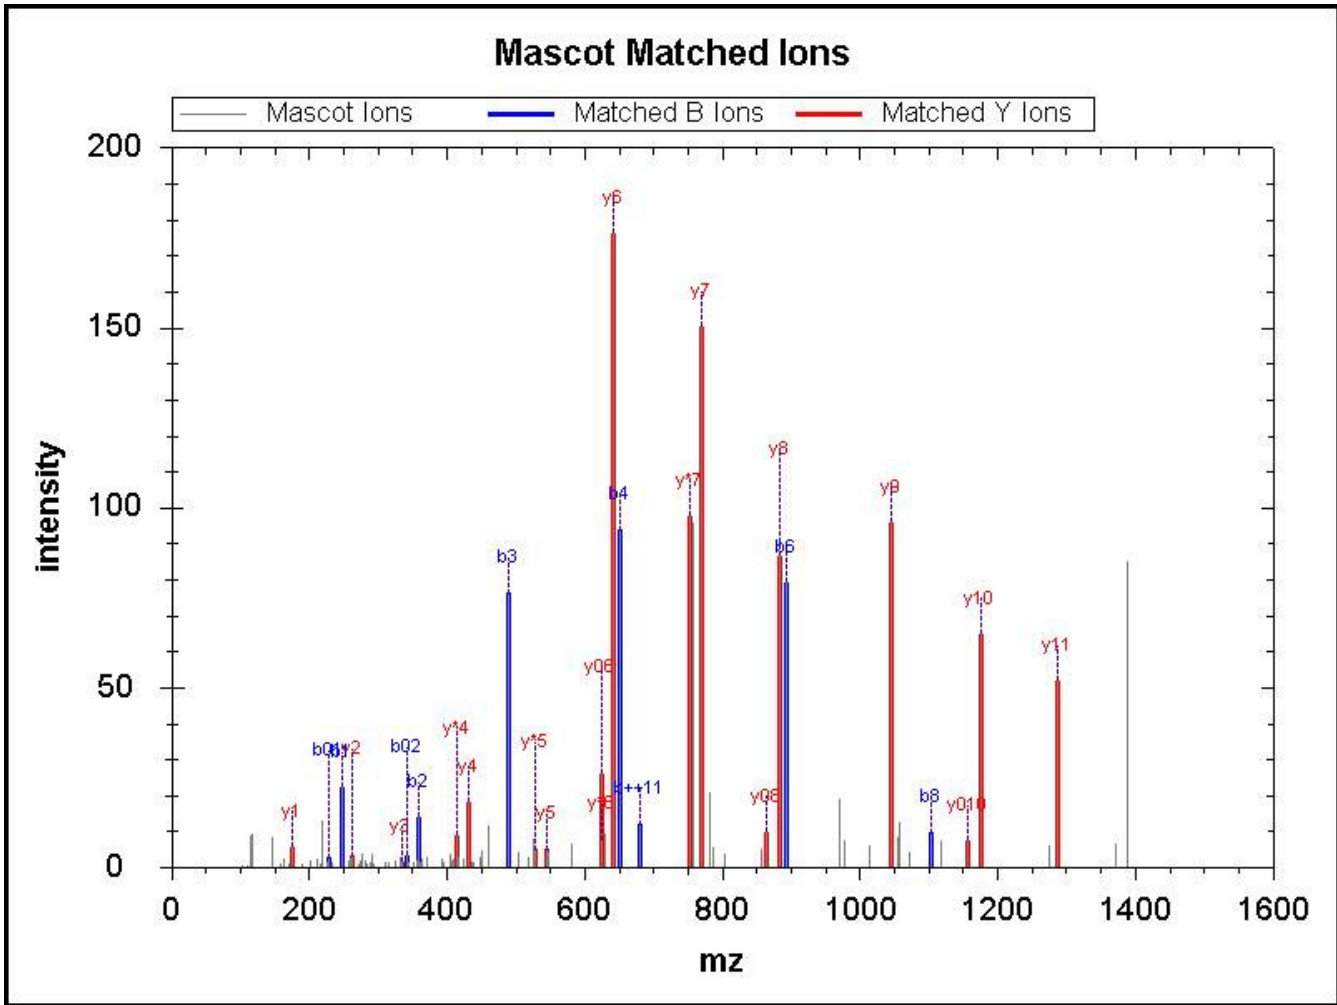

| No | b        | b++    | b*       | b*++   | b0       | b0++   | Seq | y        | y++    | y*       | y*++   | y0       | y0++   | RevNo |
|----|----------|--------|----------|--------|----------|--------|-----|----------|--------|----------|--------|----------|--------|-------|
| 1  | 246.16   | 123.58 |          |        | 228.15   | 114.58 | T   |          |        |          |        |          |        | 12    |
| 2  | 359.24   | 180.12 |          |        | 341.23   | 171.12 | I   | 1,287.67 | 644.34 | 1,270.64 | 635.83 | 1,269.66 | 635.33 | 11    |
| 3  | 488.28   | 244.65 |          |        | 470.27   | 235.64 | E   | 1,174.59 | 587.80 | 1,157.56 | 579.28 | 1,156.57 | 578.79 | 10    |
| 4  | 651.35   | 326.18 |          |        | 633.34   | 317.17 | Y   | 1,045.54 | 523.27 | 1,028.52 | 514.76 | 1,027.53 | 514.27 | 9     |
| 5  | 764.43   | 382.72 |          |        | 746.42   | 373.71 | L   | 882.48   | 441.74 | 865.45   | 433.23 | 864.47   | 432.74 | 8     |
| 6  | 892.49   | 446.75 | 875.46   | 438.24 | 874.48   | 437.74 | Q   | 769.40   | 385.20 | 752.37   | 376.69 | 751.38   | 376.20 | 7     |
| 7  | 989.54   | 495.27 | 972.52   | 486.76 | 971.53   | 486.27 | P   | 641.34   | 321.17 | 624.31   | 312.66 | 623.33   | 312.17 | 6     |
| 8  | 1,103.59 | 552.30 | 1,086.56 | 543.78 | 1,085.57 | 543.29 | N   | 544.28   | 272.65 | 527.26   | 264.13 | 526.27   | 263.64 | 5     |
| 9  | 1,200.64 | 600.82 | 1,183.61 | 592.31 | 1,182.63 | 591.82 | P   | 430.24   | 215.62 | 413.21   | 207.11 | 412.23   | 206.62 | 4     |
| 10 | 1,271.68 | 636.34 | 1,254.65 | 627.83 | 1,253.66 | 627.34 | A   | 333.19   | 167.10 | 316.16   | 158.58 | 315.18   | 158.09 | 3     |
| 11 | 1,358.71 | 679.86 | 1,341.68 | 671.34 | 1,340.70 | 670.85 | S   | 262.15   | 131.58 | 245.12   | 123.07 | 244.14   | 122.57 | 2     |
| 12 |          |        |          |        |          |        | R   | 175.12   | 88.06  | 158.09   | 79.55  |          |        | 1     |

Query 61938 Hit 1

MS/MS Fragmentation of **LTQLGTFEDHFLSLQR**

Found in **sp|P00533|EGFR\_HUMAN**, Epidermal growth factor receptor OS=Homo sapiens GN=EGFR PE=1 SV=2

Match to Query 61938: 2048.085from(683.7023,3+)

Title: 809: Sum of 2 scans in range 1983 (rt=53.1379, f=4, i=537) to 1984 (rt=53.1633, f=4, i=538)

[D:\lab212\membrane\GraceJoyce\iTRAQ\_34\_1.raw]

Data File: Submitted from 20120508-1(merge) by Mascot Daemon on JOYCE-VAIO

Monoisotopic mass of neutral peptide Mr(calc): 2048.085

Variable modifications:

Ions Score: 53.71 Expect: 0.004

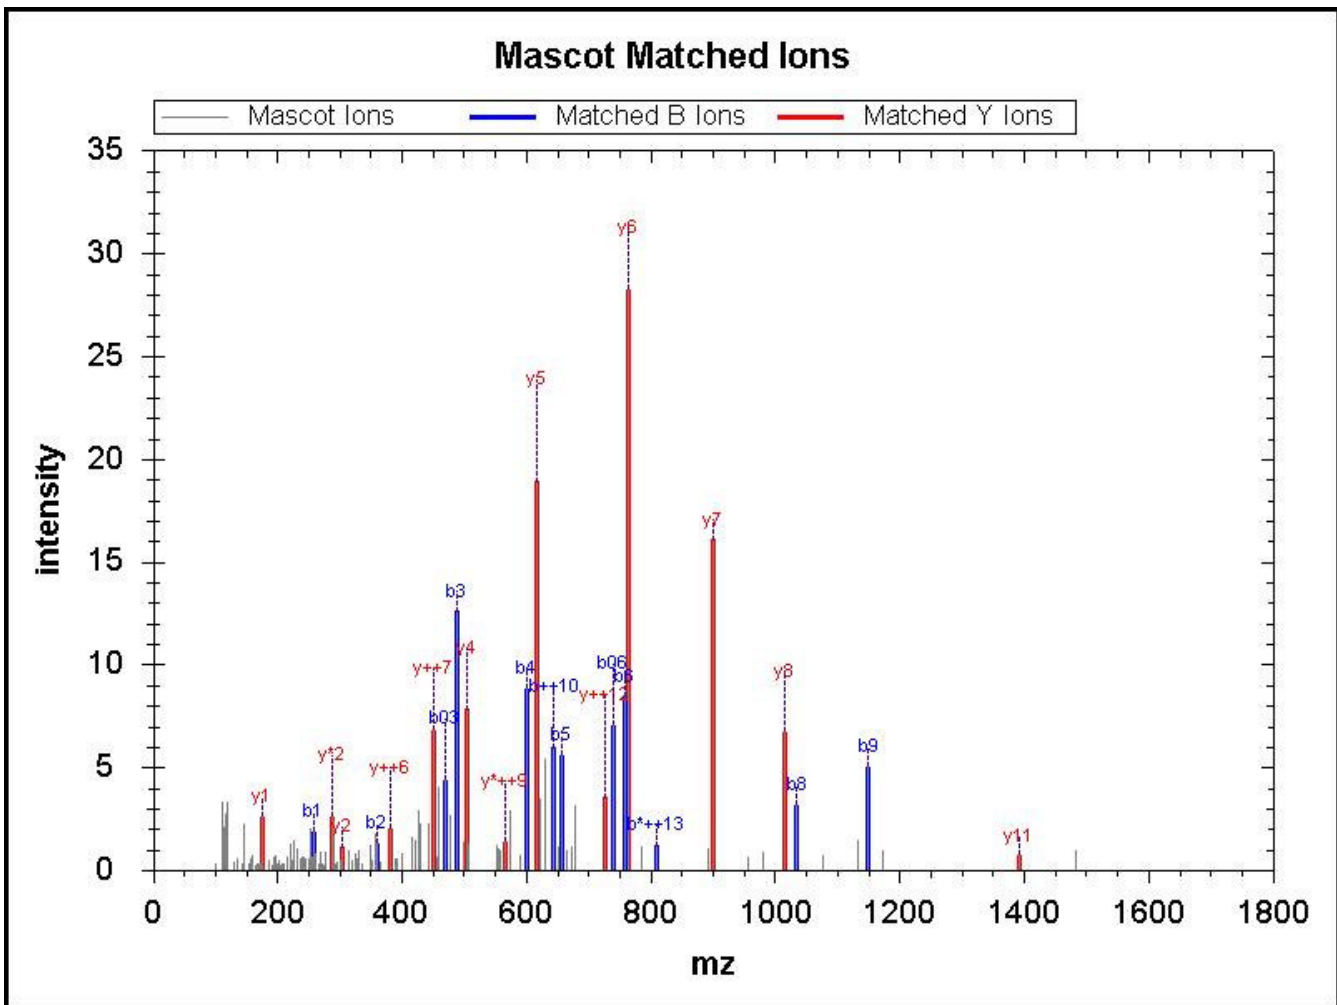

| No | b        | b++    | b*       | b*++   | b0       | b0++   | Seq | y        | y++    | y*       | y*++   | y0       | y0++   | RevNo |
|----|----------|--------|----------|--------|----------|--------|-----|----------|--------|----------|--------|----------|--------|-------|
| 1  | 258.19   | 129.60 |          |        |          |        | L   |          |        |          |        |          |        | 16    |
| 2  | 359.24   | 180.12 |          |        | 341.23   | 171.12 | T   | 1,791.90 | 896.45 | 1,774.88 | 887.94 | 1,773.89 | 887.45 | 15    |
| 3  | 487.30   | 244.15 | 470.27   | 235.64 | 469.29   | 235.15 | Q   | 1,690.85 | 845.93 | 1,673.83 | 837.42 | 1,672.84 | 836.93 | 14    |
| 4  | 600.38   | 300.70 | 583.36   | 292.18 | 582.37   | 291.69 | L   | 1,562.80 | 781.90 | 1,545.77 | 773.39 | 1,544.79 | 772.90 | 13    |
| 5  | 657.41   | 329.21 | 640.38   | 320.69 | 639.39   | 320.20 | G   | 1,449.71 | 725.36 | 1,432.69 | 716.85 | 1,431.70 | 716.35 | 12    |
| 6  | 758.45   | 379.73 | 741.43   | 371.22 | 740.44   | 370.72 | T   | 1,392.69 | 696.85 | 1,375.66 | 688.34 | 1,374.68 | 687.84 | 11    |
| 7  | 905.52   | 453.26 | 888.49   | 444.75 | 887.51   | 444.26 | F   | 1,291.64 | 646.33 | 1,274.62 | 637.81 | 1,273.63 | 637.32 | 10    |
| 8  | 1,034.56 | 517.79 | 1,017.54 | 509.27 | 1,016.55 | 508.78 | E   | 1,144.57 | 572.79 | 1,127.55 | 564.28 | 1,126.56 | 563.79 | 9     |
| 9  | 1,149.59 | 575.30 | 1,132.56 | 566.79 | 1,131.58 | 566.29 | D   | 1,015.53 | 508.27 | 998.51   | 499.76 | 997.52   | 499.26 | 8     |
| 10 | 1,286.65 | 643.83 | 1,269.62 | 635.32 | 1,268.64 | 634.82 | H   | 900.50   | 450.76 | 883.48   | 442.24 | 882.49   | 441.75 | 7     |
| 11 | 1,433.72 | 717.36 | 1,416.69 | 708.85 | 1,415.71 | 708.36 | F   | 763.45   | 382.23 | 746.42   | 373.71 | 745.44   | 373.22 | 6     |
| 12 | 1,546.80 | 773.90 | 1,529.78 | 765.39 | 1,528.79 | 764.90 | L   | 616.38   | 308.69 | 599.35   | 300.18 | 598.37   | 299.69 | 5     |
| 13 | 1,633.83 | 817.42 | 1,616.81 | 808.91 | 1,615.82 | 808.42 | S   | 503.29   | 252.15 | 486.27   | 243.64 | 485.28   | 243.15 | 4     |
| 14 | 1,746.92 | 873.96 | 1,729.89 | 865.45 | 1,728.91 | 864.96 | L   | 416.26   | 208.63 | 399.24   | 200.12 |          |        | 3     |
| 15 | 1,874.98 | 937.99 | 1,857.95 | 929.48 | 1,856.97 | 928.99 | Q   | 303.18   | 152.09 | 286.15   | 143.58 |          |        | 2     |
| 16 |          |        |          |        |          |        | R   | 175.12   | 88.06  | 158.09   | 79.55  |          |        | 1     |

Query 10412 Hit 1

MS/MS Fragmentation of **LSGFSEFK**

Found in [sp|P29966|MARCS\\_HUMAN](#), Myristoylated alanine-rich C-kinase substrate OS=Homo sapiens GN=MARCKS PE=1 SV=4

Match to Query 10412: 1072.618from(537.3165,2+)

Title: 592: Scan 1318 (rt=39.3607, f=3, i=200) [D:\lab212\membrane\Grace\Joyce\iTRAQ\_33\_2.raw]

Data File: Submitted from 20120508-1(merge) by Mascot Daemon on JOYCE-VAIO

Monoisotopic mass of neutral peptide Mr(calc): 1072.618

Variable modifications:

K7 :iTRAQ4plex (K)  
 Ions Score: 53.62 Expect: 0.003

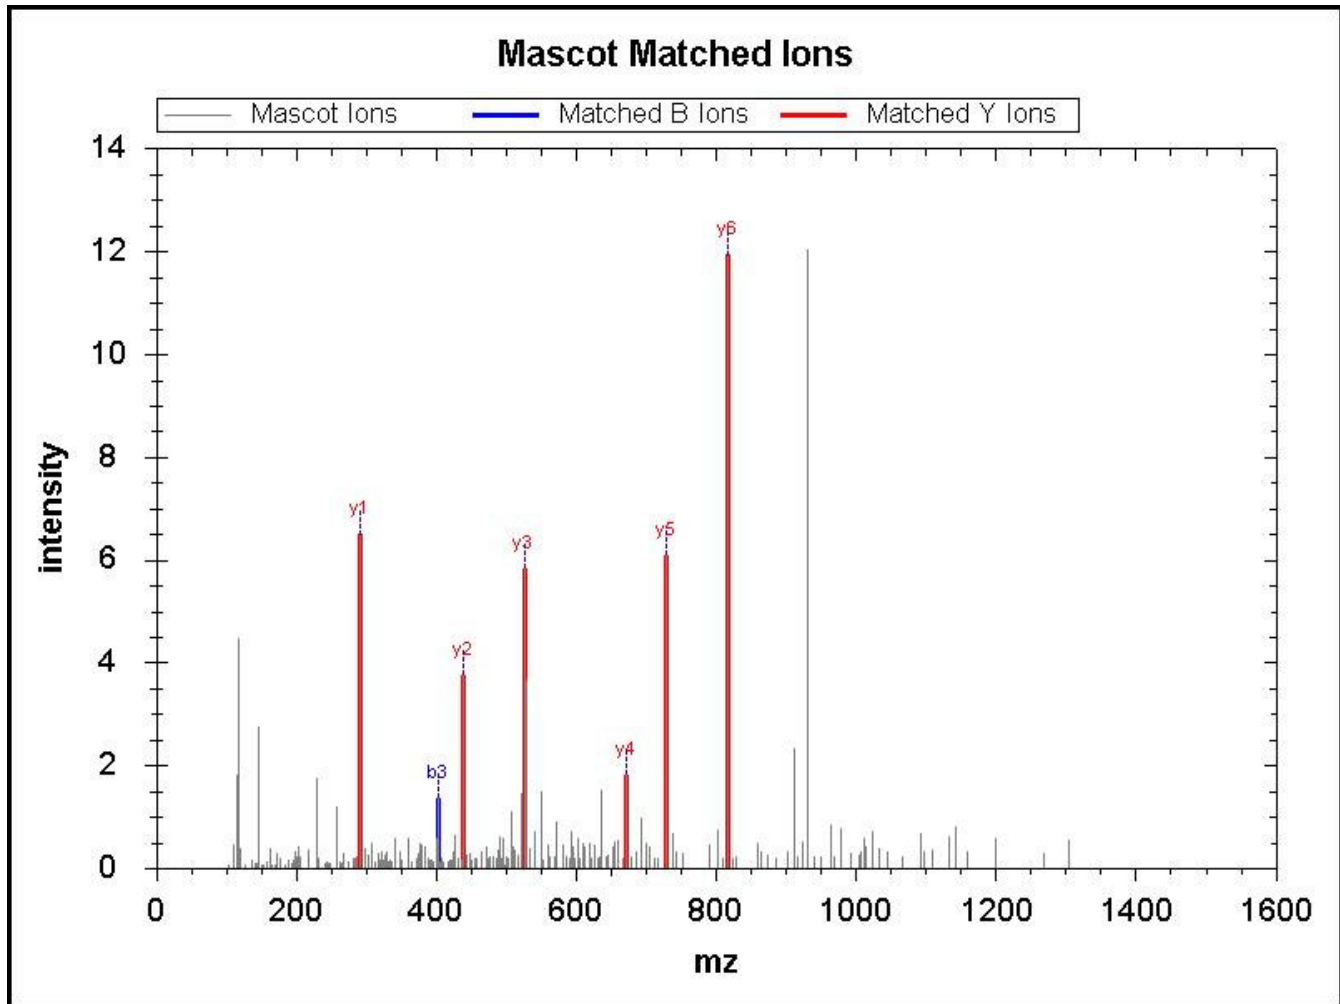

| No | b      | b++    | b0     | b0++   | Seq | y      | y++    | y*     | y*++   | y0     | y0++   | RevNo |
|----|--------|--------|--------|--------|-----|--------|--------|--------|--------|--------|--------|-------|
| 1  | 258.19 | 129.60 |        |        | L   |        |        |        |        |        |        | 7     |
| 2  | 345.23 | 173.12 | 327.21 | 164.11 | S   | 816.44 | 408.72 | 799.41 | 400.21 | 798.43 | 399.72 | 6     |
| 3  | 402.25 | 201.63 | 384.24 | 192.62 | G   | 729.41 | 365.21 | 712.38 | 356.69 | 711.39 | 356.20 | 5     |
| 4  | 549.32 | 275.16 | 531.30 | 266.16 | F   | 672.38 | 336.70 | 655.36 | 328.18 | 654.37 | 327.69 | 4     |
| 5  | 636.35 | 318.68 | 618.34 | 309.67 | S   | 525.32 | 263.16 | 508.29 | 254.65 | 507.30 | 254.16 | 3     |
| 6  | 783.42 | 392.21 | 765.41 | 383.21 | F   | 438.28 | 219.65 | 421.26 | 211.13 |        |        | 2     |
| 7  |        |        |        |        | K   | 291.21 | 146.11 | 274.19 | 137.60 |        |        | 1     |

Query 41696 Hit 1

MS/MS Fragmentation of **AQAAAPASVPAQAPK**

Found in **sp|P47914|RL29\_HUMAN**, 60S ribosomal protein L29 OS=Homo sapiens GN=RPL29 PE=1 SV=2

Match to Query 41696: 1664.949from(555.9902,3+)

Title: 195: Sum of 2 scans in range 534 (rt=21.3518, f=4, i=123) to 535 (rt=21.3772, f=4, i=124)

[D:\lab212\membrane\GraceJoyce\iTRAQ\_27\_1.raw]

Data File: Submitted from 20120508-1(merge) by Mascot Daemon on JOYCE-VAIO

Monoisotopic mass of neutral peptide Mr(calc): 1664.949

Variable modifications:

K15 :iTRAQ4plex (K)

Ions Score: 53.34 Expect: 0.003

### Mascot Matched Ions

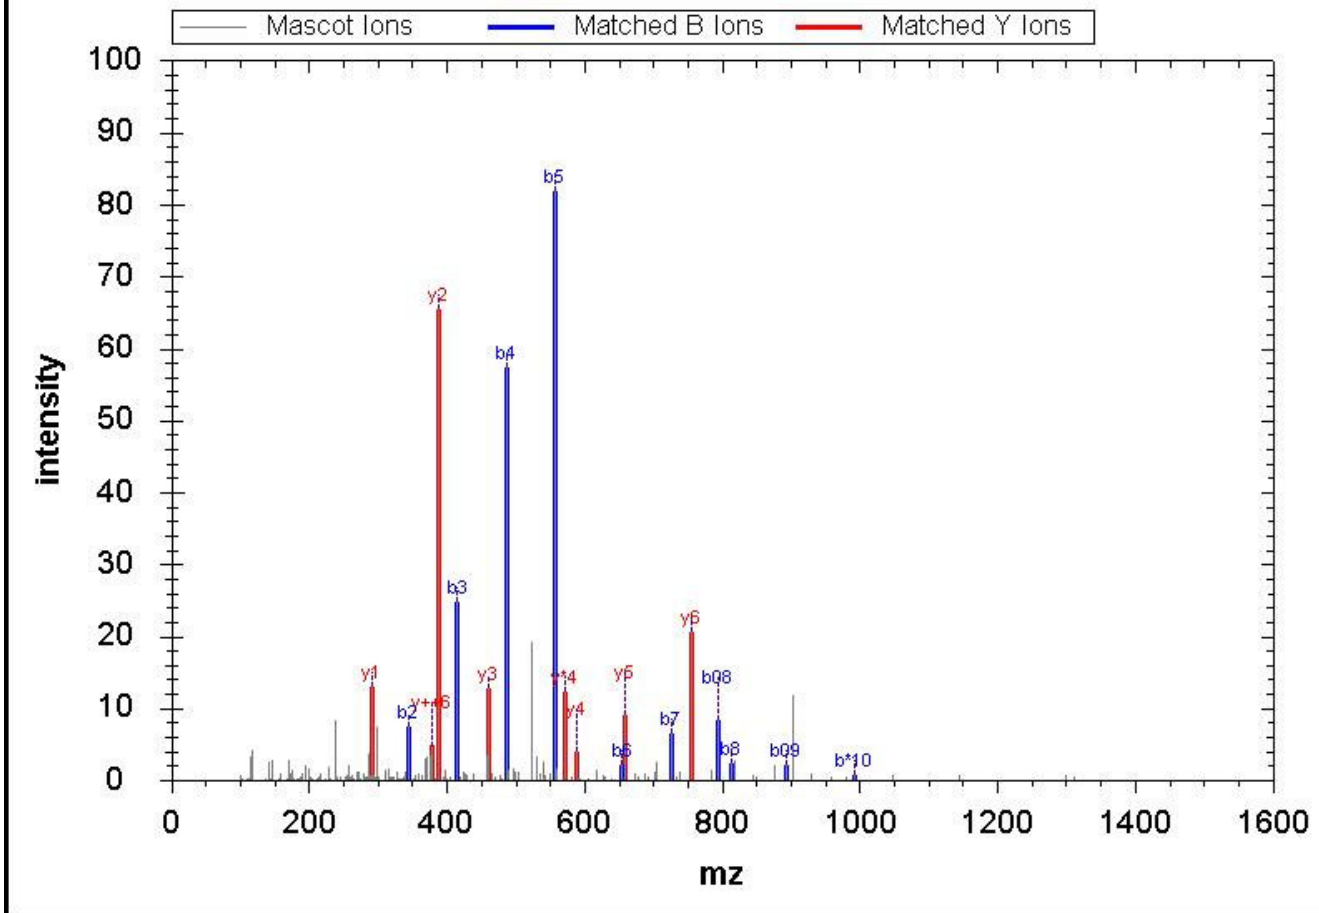

| No | b        | b++    | b*       | b*++   | b0       | b0++   | Seq | y        | y++    | y*       | y*++   | y0       | y0++   | RevNo |
|----|----------|--------|----------|--------|----------|--------|-----|----------|--------|----------|--------|----------|--------|-------|
| 1  | 216.15   | 108.58 |          |        |          |        | A   |          |        |          |        |          |        | 15    |
| 2  | 344.21   | 172.61 | 327.18   | 164.09 |          |        | Q   | 1,450.81 | 725.91 | 1,433.79 | 717.40 | 1,432.80 | 716.91 | 14    |
| 3  | 415.24   | 208.12 | 398.22   | 199.61 |          |        | A   | 1,322.75 | 661.88 | 1,305.73 | 653.37 | 1,304.74 | 652.88 | 13    |
| 4  | 486.28   | 243.64 | 469.25   | 235.13 |          |        | A   | 1,251.72 | 626.36 | 1,234.69 | 617.85 | 1,233.71 | 617.36 | 12    |
| 5  | 557.32   | 279.16 | 540.29   | 270.65 |          |        | A   | 1,180.68 | 590.84 | 1,163.65 | 582.33 | 1,162.67 | 581.84 | 11    |
| 6  | 654.37   | 327.69 | 637.34   | 319.17 |          |        | P   | 1,109.64 | 555.33 | 1,092.62 | 546.81 | 1,091.63 | 546.32 | 10    |
| 7  | 725.41   | 363.21 | 708.38   | 354.69 |          |        | A   | 1,012.59 | 506.80 | 995.56   | 498.29 | 994.58   | 497.79 | 9     |
| 8  | 812.44   | 406.72 | 795.41   | 398.21 | 794.43   | 397.72 | S   | 941.55   | 471.28 | 924.53   | 462.77 | 923.54   | 462.28 | 8     |
| 9  | 911.51   | 456.26 | 894.48   | 447.74 | 893.50   | 447.25 | V   | 854.52   | 427.76 | 837.49   | 419.25 |          |        | 7     |
| 10 | 1,008.56 | 504.78 | 991.53   | 496.27 | 990.55   | 495.78 | P   | 755.45   | 378.23 | 738.43   | 369.72 |          |        | 6     |
| 11 | 1,079.60 | 540.30 | 1,062.57 | 531.79 | 1,061.59 | 531.30 | A   | 658.40   | 329.70 | 641.37   | 321.19 |          |        | 5     |
| 12 | 1,207.66 | 604.33 | 1,190.63 | 595.82 | 1,189.64 | 595.33 | Q   | 587.36   | 294.19 | 570.34   | 285.67 |          |        | 4     |
| 13 | 1,278.69 | 639.85 | 1,261.67 | 631.34 | 1,260.68 | 630.84 | A   | 459.30   | 230.16 | 442.28   | 221.64 |          |        | 3     |
| 14 | 1,375.74 | 688.38 | 1,358.72 | 679.86 | 1,357.73 | 679.37 | P   | 388.27   | 194.64 | 371.24   | 186.12 |          |        | 2     |
| 15 |          |        |          |        |          |        | K   | 291.21   | 146.11 | 274.19   | 137.60 |          |        | 1     |

Query 86725 Hit 1

MS/MS Fragmentation of **SILTDNPTWIIDPIDGTTNFVHR**

Found in **sp|P29218|IMPA1\_HUMAN**, Inositol monophosphatase 1 OS=Homo sapiens GN=IMPA1 PE=1 SV=1

Match to Query 86725: 2768.418from(923.8132,3+)

Title: 995: Scan 2207 (rt=59.0809, f=2, i=348) [D:\lab212\membrane\Grace\Joyce\iTRAQ\_31\_1.raw]

Data File:Submitted from 20120508-1(merge) by Mascot Daemon on JOYCE-VAIO

Monoisotopic mass of neutral peptide Mr(calc): 2768.418

Variable modifications:

Ions Score: 53.34 Expect: 0.004

### Mascot Matched Ions

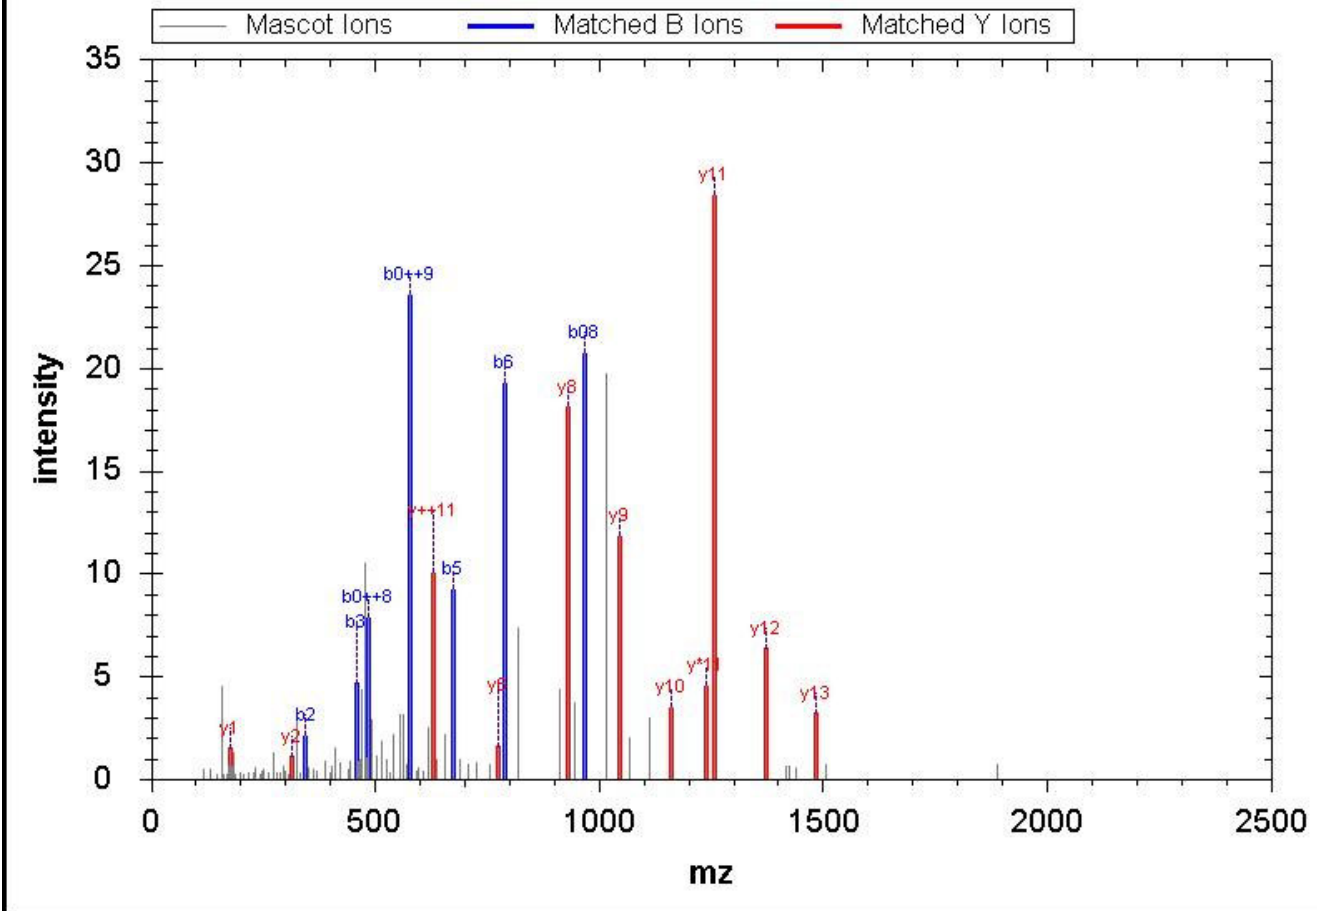

| No | b        | b++      | b*       | b*++     | b0       | b0++     | Seq | y        | y++      | y*       | y*++     | y0       | y0++     | RevNo |
|----|----------|----------|----------|----------|----------|----------|-----|----------|----------|----------|----------|----------|----------|-------|
| 1  | 232.14   | 116.57   |          |          | 214.13   | 107.57   | S   |          |          |          |          |          |          | 23    |
| 2  | 345.23   | 173.12   |          |          | 327.21   | 164.11   | I   | 2,538.30 | 1,269.65 | 2,521.27 | 1,261.14 | 2,520.29 | 1,260.65 | 22    |
| 3  | 458.31   | 229.66   |          |          | 440.30   | 220.65   | L   | 2,425.21 | 1,213.11 | 2,408.19 | 1,204.60 | 2,407.20 | 1,204.11 | 21    |
| 4  | 559.36   | 280.18   |          |          | 541.35   | 271.18   | T   | 2,312.13 | 1,156.57 | 2,295.10 | 1,148.06 | 2,294.12 | 1,147.56 | 20    |
| 5  | 674.38   | 337.70   |          |          | 656.37   | 328.69   | D   | 2,211.08 | 1,106.05 | 2,194.06 | 1,097.53 | 2,193.07 | 1,097.04 | 19    |
| 6  | 788.43   | 394.72   | 771.40   | 386.20   | 770.42   | 385.71   | N   | 2,096.06 | 1,048.53 | 2,079.03 | 1,040.02 | 2,078.05 | 1,039.53 | 18    |
| 7  | 885.48   | 443.24   | 868.45   | 434.73   | 867.47   | 434.24   | P   | 1,982.01 | 991.51   | 1,964.99 | 983.00   | 1,964.00 | 982.50   | 17    |
| 8  | 986.53   | 493.77   | 969.50   | 485.25   | 968.52   | 484.76   | T   | 1,884.96 | 942.98   | 1,867.93 | 934.47   | 1,866.95 | 933.98   | 16    |
| 9  | 1,172.61 | 586.81   | 1,155.58 | 578.29   | 1,154.60 | 577.80   | W   | 1,783.91 | 892.46   | 1,766.89 | 883.95   | 1,765.90 | 883.45   | 15    |
| 10 | 1,285.69 | 643.35   | 1,268.66 | 634.84   | 1,267.68 | 634.34   | I   | 1,597.83 | 799.42   | 1,580.81 | 790.91   | 1,579.82 | 790.42   | 14    |
| 11 | 1,398.77 | 699.89   | 1,381.75 | 691.38   | 1,380.76 | 690.89   | I   | 1,484.75 | 742.88   | 1,467.72 | 734.37   | 1,466.74 | 733.87   | 13    |
| 12 | 1,513.80 | 757.40   | 1,496.78 | 748.89   | 1,495.79 | 748.40   | D   | 1,371.67 | 686.34   | 1,354.64 | 677.82   | 1,353.65 | 677.33   | 12    |
| 13 | 1,610.85 | 805.93   | 1,593.83 | 797.42   | 1,592.84 | 796.93   | P   | 1,256.64 | 628.82   | 1,239.61 | 620.31   | 1,238.63 | 619.82   | 11    |
| 14 | 1,723.94 | 862.47   | 1,706.91 | 853.96   | 1,705.93 | 853.47   | I   | 1,159.59 | 580.30   | 1,142.56 | 571.78   | 1,141.57 | 571.29   | 10    |
| 15 | 1,838.97 | 919.99   | 1,821.94 | 911.47   | 1,820.96 | 910.98   | D   | 1,046.50 | 523.75   | 1,029.47 | 515.24   | 1,028.49 | 514.75   | 9     |
| 16 | 1,895.99 | 948.50   | 1,878.96 | 939.98   | 1,877.98 | 939.49   | G   | 931.47   | 466.24   | 914.45   | 457.73   | 913.46   | 457.24   | 8     |
| 17 | 1,997.03 | 999.02   | 1,980.01 | 990.51   | 1,979.02 | 990.02   | T   | 874.45   | 437.73   | 857.43   | 429.22   | 856.44   | 428.72   | 7     |
| 18 | 2,098.08 | 1,049.54 | 2,081.06 | 1,041.03 | 2,080.07 | 1,040.54 | T   | 773.41   | 387.21   | 756.38   | 378.69   | 755.39   | 378.20   | 6     |
| 19 | 2,212.13 | 1,106.57 | 2,195.10 | 1,098.05 | 2,194.11 | 1,097.56 | N   | 672.36   | 336.68   | 655.33   | 328.17   |          |          | 5     |
| 20 | 2,359.19 | 1,180.10 | 2,342.17 | 1,171.59 | 2,341.18 | 1,171.10 | F   | 558.31   | 279.66   | 541.29   | 271.15   |          |          | 4     |
| 21 | 2,458.26 | 1,229.63 | 2,441.24 | 1,221.12 | 2,440.25 | 1,220.63 | V   | 411.25   | 206.13   | 394.22   | 197.61   |          |          | 3     |
| 22 | 2,595.32 | 1,298.16 | 2,578.29 | 1,289.65 | 2,577.31 | 1,289.16 | H   | 312.18   | 156.59   | 295.15   | 148.08   |          |          | 2     |
| 23 |          |          |          |          |          |          | R   | 175.12   | 88.06    | 158.09   | 79.55    |          |          | 1     |

Query 95577 Hit 1

MS/MS Fragmentation of **GGGGGGSPGPTAGPEPLSLPGILHFIQHEWAR**

Found in **sp|Q9NRL3|STRN4\_HUMAN**, Striatin-4 OS=Homo sapiens GN=STRN4 PE=1 SV=2

Match to Query 95577: 3292.695from(824.1811,4+)

Title: 1285: Sum of 2 scans in range 2818 (rt=73.0891, f=3, i=454) to 2819 (rt=73.1145, f=3, i=455)

[D:\lab212\membrane\GraceJoyce\iTRAQ\_42\_2.raw]

Data File: Submitted from 20120508-1(merge) by Mascot Daemon on JOYCE-VAIO

Monoisotopic mass of neutral peptide Mr(calc): 3292.695

Variable modifications:

Ions Score: 53.31 Expect: 0.004

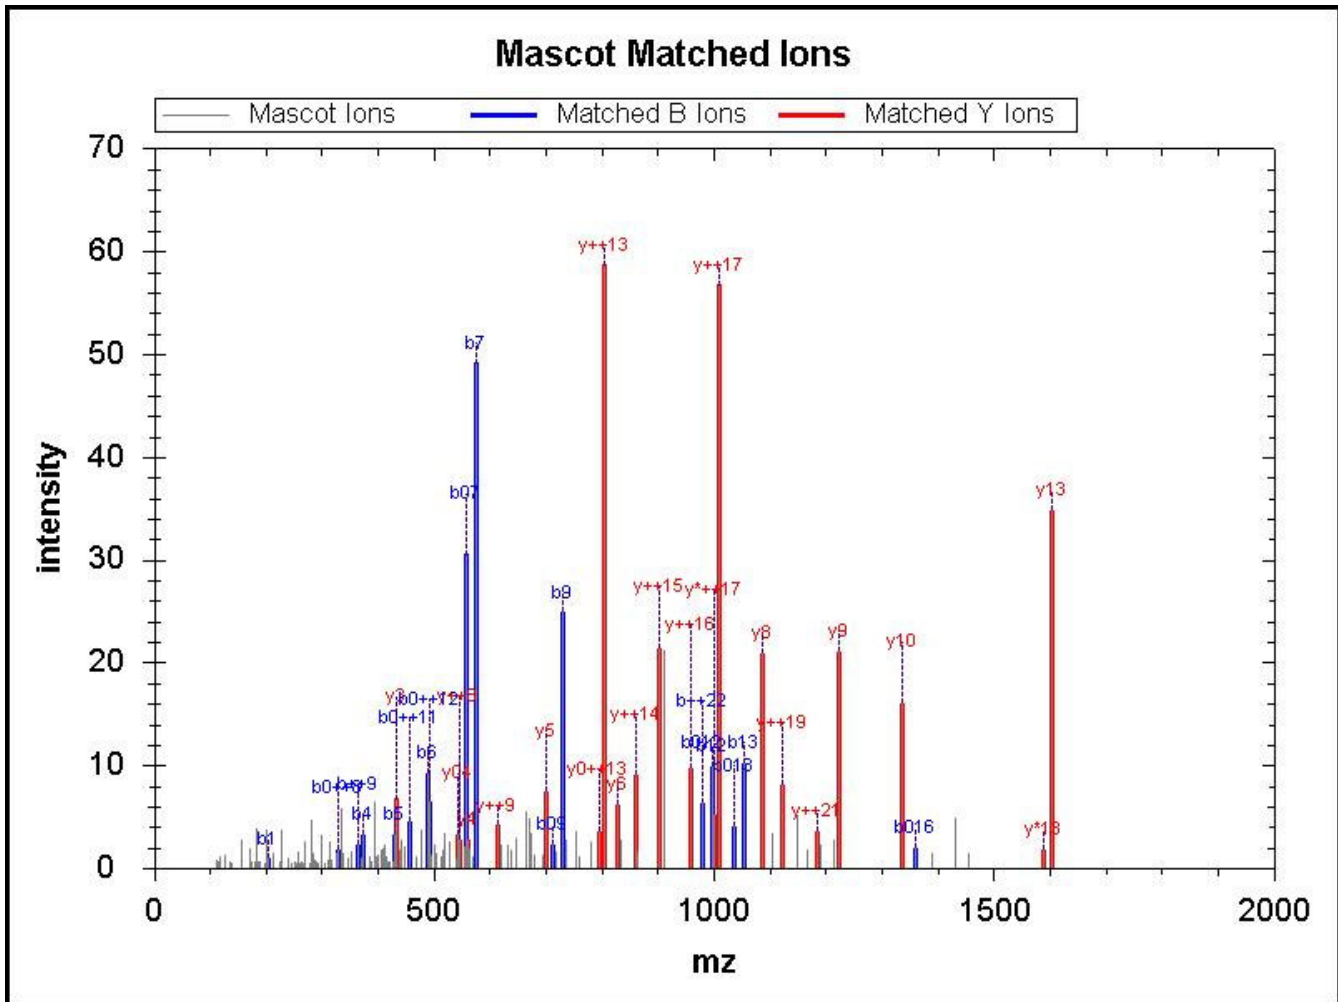

| No | b        | b++    | b* | b*++ | b0       | b0++   | Seq | y        | y++      | y*       | y*++     | y0       | y0++     | RevNo |
|----|----------|--------|----|------|----------|--------|-----|----------|----------|----------|----------|----------|----------|-------|
| 1  | 202.13   | 101.57 |    |      |          |        | G   |          |          |          |          |          |          | 32    |
| 2  | 259.15   | 130.08 |    |      |          |        | G   | 3,092.57 | 1,546.79 | 3,075.54 | 1,538.28 | 3,074.56 | 1,537.78 | 31    |
| 3  | 316.17   | 158.59 |    |      |          |        | G   | 3,035.55 | 1,518.28 | 3,018.52 | 1,509.76 | 3,017.54 | 1,509.27 | 30    |
| 4  | 373.20   | 187.10 |    |      |          |        | G   | 2,978.53 | 1,489.77 | 2,961.50 | 1,481.25 | 2,960.52 | 1,480.76 | 29    |
| 5  | 430.22   | 215.61 |    |      |          |        | G   | 2,921.51 | 1,461.26 | 2,904.48 | 1,452.74 | 2,903.50 | 1,452.25 | 28    |
| 6  | 487.24   | 244.12 |    |      |          |        | G   | 2,864.48 | 1,432.75 | 2,847.46 | 1,424.23 | 2,846.47 | 1,423.74 | 27    |
| 7  | 574.27   | 287.64 |    |      | 556.26   | 278.63 | S   | 2,807.46 | 1,404.23 | 2,790.44 | 1,395.72 | 2,789.45 | 1,395.23 | 26    |
| 8  | 671.32   | 336.17 |    |      | 653.31   | 327.16 | P   | 2,720.43 | 1,360.72 | 2,703.40 | 1,352.21 | 2,702.42 | 1,351.71 | 25    |
| 9  | 728.34   | 364.68 |    |      | 710.33   | 355.67 | G   | 2,623.38 | 1,312.19 | 2,606.35 | 1,303.68 | 2,605.37 | 1,303.19 | 24    |
| 10 | 825.40   | 413.20 |    |      | 807.39   | 404.20 | P   | 2,566.36 | 1,283.68 | 2,549.33 | 1,275.17 | 2,548.35 | 1,274.68 | 23    |
| 11 | 926.44   | 463.73 |    |      | 908.43   | 454.72 | T   | 2,469.30 | 1,235.16 | 2,452.28 | 1,226.64 | 2,451.29 | 1,226.15 | 22    |
| 12 | 997.48   | 499.24 |    |      | 979.47   | 490.24 | A   | 2,368.26 | 1,184.63 | 2,351.23 | 1,176.12 | 2,350.25 | 1,175.63 | 21    |
| 13 | 1,054.50 | 527.76 |    |      | 1,036.49 | 518.75 | G   | 2,297.22 | 1,149.11 | 2,280.19 | 1,140.60 | 2,279.21 | 1,140.11 | 20    |
| 14 | 1,151.56 | 576.28 |    |      | 1,133.55 | 567.28 | P   | 2,240.20 | 1,120.60 | 2,223.17 | 1,112.09 | 2,222.19 | 1,111.60 | 19    |

|    |          |          |          |          |          |          |   |          |          |          |          |          |          |    |
|----|----------|----------|----------|----------|----------|----------|---|----------|----------|----------|----------|----------|----------|----|
| 15 | 1,280.60 | 640.80   |          |          | 1,262.59 | 631.80   | E | 2,143.14 | 1,072.08 | 2,126.12 | 1,063.56 | 2,125.13 | 1,063.07 | 18 |
| 16 | 1,377.65 | 689.33   |          |          | 1,359.64 | 680.32   | P | 2,014.10 | 1,007.55 | 1,997.08 | 999.04   | 1,996.09 | 998.55   | 17 |
| 17 | 1,490.74 | 745.87   |          |          | 1,472.72 | 736.87   | L | 1,917.05 | 959.03   | 1,900.02 | 950.52   | 1,899.04 | 950.02   | 16 |
| 18 | 1,577.77 | 789.39   |          |          | 1,559.76 | 780.38   | S | 1,803.97 | 902.49   | 1,786.94 | 893.97   | 1,785.95 | 893.48   | 15 |
| 19 | 1,690.85 | 845.93   |          |          | 1,672.84 | 836.92   | L | 1,716.93 | 858.97   | 1,699.91 | 850.46   | 1,698.92 | 849.97   | 14 |
| 20 | 1,787.90 | 894.46   |          |          | 1,769.89 | 885.45   | P | 1,603.85 | 802.43   | 1,586.82 | 793.92   | 1,585.84 | 793.42   | 13 |
| 21 | 1,844.93 | 922.97   |          |          | 1,826.92 | 913.96   | G | 1,506.80 | 753.90   | 1,489.77 | 745.39   | 1,488.79 | 744.90   | 12 |
| 22 | 1,958.01 | 979.51   |          |          | 1,940.00 | 970.50   | I | 1,449.78 | 725.39   | 1,432.75 | 716.88   | 1,431.76 | 716.39   | 11 |
| 23 | 2,071.09 | 1,036.05 |          |          | 2,053.08 | 1,027.05 | L | 1,336.69 | 668.85   | 1,319.66 | 660.34   | 1,318.68 | 659.84   | 10 |
| 24 | 2,208.15 | 1,104.58 |          |          | 2,190.14 | 1,095.57 | H | 1,223.61 | 612.31   | 1,206.58 | 603.79   | 1,205.60 | 603.30   | 9  |
| 25 | 2,355.22 | 1,178.11 |          |          | 2,337.21 | 1,169.11 | F | 1,086.55 | 543.78   | 1,069.52 | 535.26   | 1,068.54 | 534.77   | 8  |
| 26 | 2,468.31 | 1,234.66 |          |          | 2,450.29 | 1,225.65 | I | 939.48   | 470.24   | 922.45   | 461.73   | 921.47   | 461.24   | 7  |
| 27 | 2,596.36 | 1,298.69 | 2,579.34 | 1,290.17 | 2,578.35 | 1,289.68 | Q | 826.40   | 413.70   | 809.37   | 405.19   | 808.38   | 404.70   | 6  |
| 28 | 2,733.42 | 1,367.21 | 2,716.40 | 1,358.70 | 2,715.41 | 1,358.21 | H | 698.34   | 349.67   | 681.31   | 341.16   | 680.33   | 340.67   | 5  |
| 29 | 2,862.47 | 1,431.74 | 2,845.44 | 1,423.22 | 2,844.45 | 1,422.73 | E | 561.28   | 281.14   | 544.25   | 272.63   | 543.27   | 272.14   | 4  |
| 30 | 3,048.54 | 1,524.78 | 3,031.52 | 1,516.26 | 3,030.53 | 1,515.77 | W | 432.24   | 216.62   | 415.21   | 208.11   |          |          | 3  |
| 31 | 3,119.58 | 1,560.29 | 3,102.55 | 1,551.78 | 3,101.57 | 1,551.29 | A | 246.16   | 123.58   | 229.13   | 115.07   |          |          | 2  |
| 32 |          |          |          |          |          |          | R | 175.12   | 88.06    | 158.09   | 79.55    |          |          | 1  |

Query 16602 Hit 1

MS/MS Fragmentation of **VVVPPPLPGK**

Found in **sp|O60493|SNX3\_HUMAN**, Sorting nexin-3 OS=Homo sapiens GN=SNX3 PE=1 SV=3

Match to Query 16602: 1192.78from(597.397,2+)

Title: 460: Sum of 2 scans in range 1096 (rt=34.0359, f=4, i=307) to 1097 (rt=34.0613, f=4, i=308)

[D:\lab212\membrane\Grace\Joyce\iTRAQ\_28\_1\_327.raw]

Data File: Submitted from 20120508-1(merge) by Mascot Daemon on JOYCE-VAIO

Monoisotopic mass of neutral peptide Mr(calc): 1192.78

Variable modifications:

K9 :iTRAQ4plex (K)

Ions Score: 53.18 Expect: 0.001



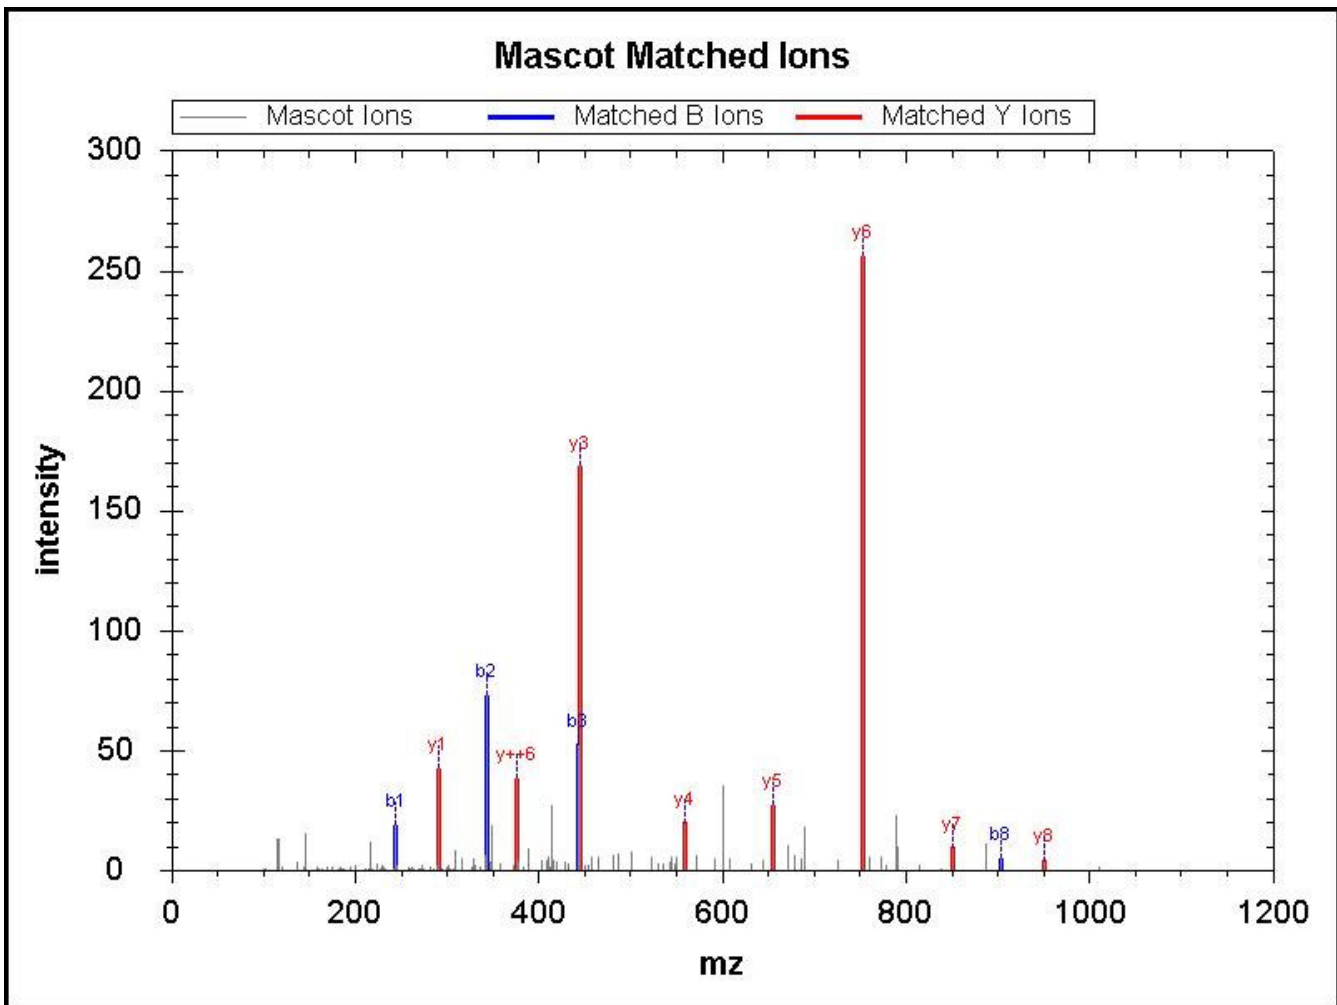

| No | b      | b++    | Seq | y      | y++    | y*     | y*++   | RevNo |
|----|--------|--------|-----|--------|--------|--------|--------|-------|
| 1  | 244.18 | 122.59 | V   |        |        |        |        | 9     |
| 2  | 343.25 | 172.13 | V   | 950.62 | 475.81 | 933.59 | 467.30 | 8     |
| 3  | 442.31 | 221.66 | V   | 851.55 | 426.28 | 834.52 | 417.76 | 7     |
| 4  | 539.37 | 270.19 | P   | 752.48 | 376.74 | 735.45 | 368.23 | 6     |
| 5  | 636.42 | 318.71 | P   | 655.43 | 328.22 | 638.40 | 319.70 | 5     |
| 6  | 749.50 | 375.26 | L   | 558.37 | 279.69 | 541.35 | 271.18 | 4     |
| 7  | 846.56 | 423.78 | P   | 445.29 | 223.15 | 428.26 | 214.63 | 3     |
| 8  | 903.58 | 452.29 | G   | 348.24 | 174.62 | 331.21 | 166.11 | 2     |
| 9  |        |        | K   | 291.21 | 146.11 | 274.19 | 137.60 | 1     |

Query 31871 Hit 1

MS/MS Fragmentation of **LQVEEVHQLSR**

Found in **sp|Q9NR28|DBLOH\_HUMAN**, Diablo homolog

Match to Query 31871: 1480.806 from (494.6092, 3+)

Title: 328: Scan 812 (rt=27.6222, f=3, i=114) [D:\lab212\membrane\Grace\Joyce\iTRAQ\_38\_1.raw]

Data File: Submitted from 20120508-1(merge) by Mascot Daemon on JOYCE-VAIO

Monoisotopic mass of neutral peptide Mr(calc): 1480.806

Variable modifications:

Ions Score: 53.13 Expect: 0.004

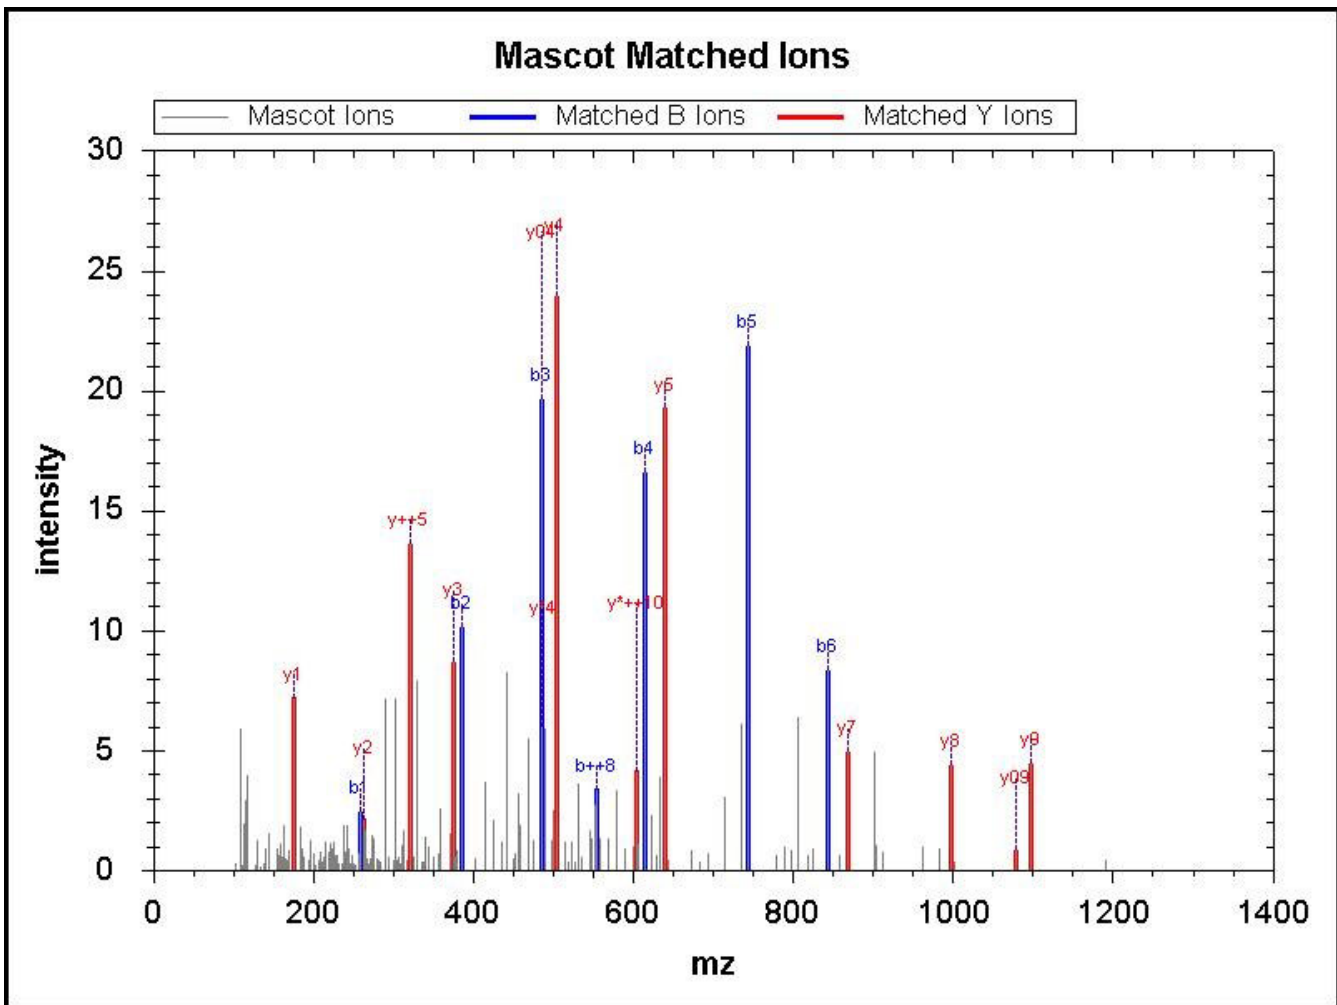

| No | b        | b++    | b*       | b*++   | b0       | b0++   | Seq | y        | y++    | y*       | y*++   | y0       | y0++   | RevNo |
|----|----------|--------|----------|--------|----------|--------|-----|----------|--------|----------|--------|----------|--------|-------|
| 1  | 258.19   | 129.60 |          |        |          |        | L   |          |        |          |        |          |        | 11    |
| 2  | 386.25   | 193.63 | 369.23   | 185.12 |          |        | Q   | 1,224.63 | 612.82 | 1,207.61 | 604.31 | 1,206.62 | 603.81 | 10    |
| 3  | 485.32   | 243.16 | 468.29   | 234.65 |          |        | V   | 1,096.57 | 548.79 | 1,079.55 | 540.28 | 1,078.56 | 539.79 | 9     |
| 4  | 614.36   | 307.69 | 597.34   | 299.17 | 596.35   | 298.68 | E   | 997.51   | 499.26 | 980.48   | 490.74 | 979.50   | 490.25 | 8     |
| 5  | 743.41   | 372.21 | 726.38   | 363.69 | 725.40   | 363.20 | E   | 868.46   | 434.74 | 851.44   | 426.22 | 850.45   | 425.73 | 7     |
| 6  | 842.47   | 421.74 | 825.45   | 413.23 | 824.46   | 412.74 | V   | 739.42   | 370.21 | 722.39   | 361.70 | 721.41   | 361.21 | 6     |
| 7  | 979.53   | 490.27 | 962.51   | 481.76 | 961.52   | 481.26 | H   | 640.35   | 320.68 | 623.33   | 312.17 | 622.34   | 311.67 | 5     |
| 8  | 1,107.59 | 554.30 | 1,090.57 | 545.79 | 1,089.58 | 545.29 | Q   | 503.29   | 252.15 | 486.27   | 243.64 | 485.28   | 243.15 | 4     |
| 9  | 1,220.68 | 610.84 | 1,203.65 | 602.33 | 1,202.67 | 601.84 | L   | 375.24   | 188.12 | 358.21   | 179.61 | 357.22   | 179.12 | 3     |
| 10 | 1,307.71 | 654.36 | 1,290.68 | 645.84 | 1,289.70 | 645.35 | S   | 262.15   | 131.58 | 245.12   | 123.07 | 244.14   | 122.57 | 2     |
| 11 |          |        |          |        |          |        | R   | 175.12   | 88.06  | 158.09   | 79.55  |          |        | 1     |

Query 40679 Hit 1

MS/MS Fragmentation of EAILEYLHQK

Found in sp|Q9Y314|NOSIP\_HUMAN, Nitric oxide synthase-interacting protein OS=Homo sapiens GN=NOSIP PE=1 SV=1  
Match to Query 40679: 1643.895from(548.9721,3+)

Title: 875: Sum of 2 scans in range 1895 (rt=52.444, f=4, i=591) to 1896 (rt=52.4693, f=4, i=592)

[D:\lab212\membrane\GraceJoyce\iTRAQ40.raw]

Data File: Submitted from 20120508-1(merge) by Mascot Daemon on JOYCE-VAIO

Monoisotopic mass of neutral peptide Mr(calc): 1643.895

Variable modifications:

K11 iTRAQ4plex (K)

Ions Score: 53.1 Expect: 0.004

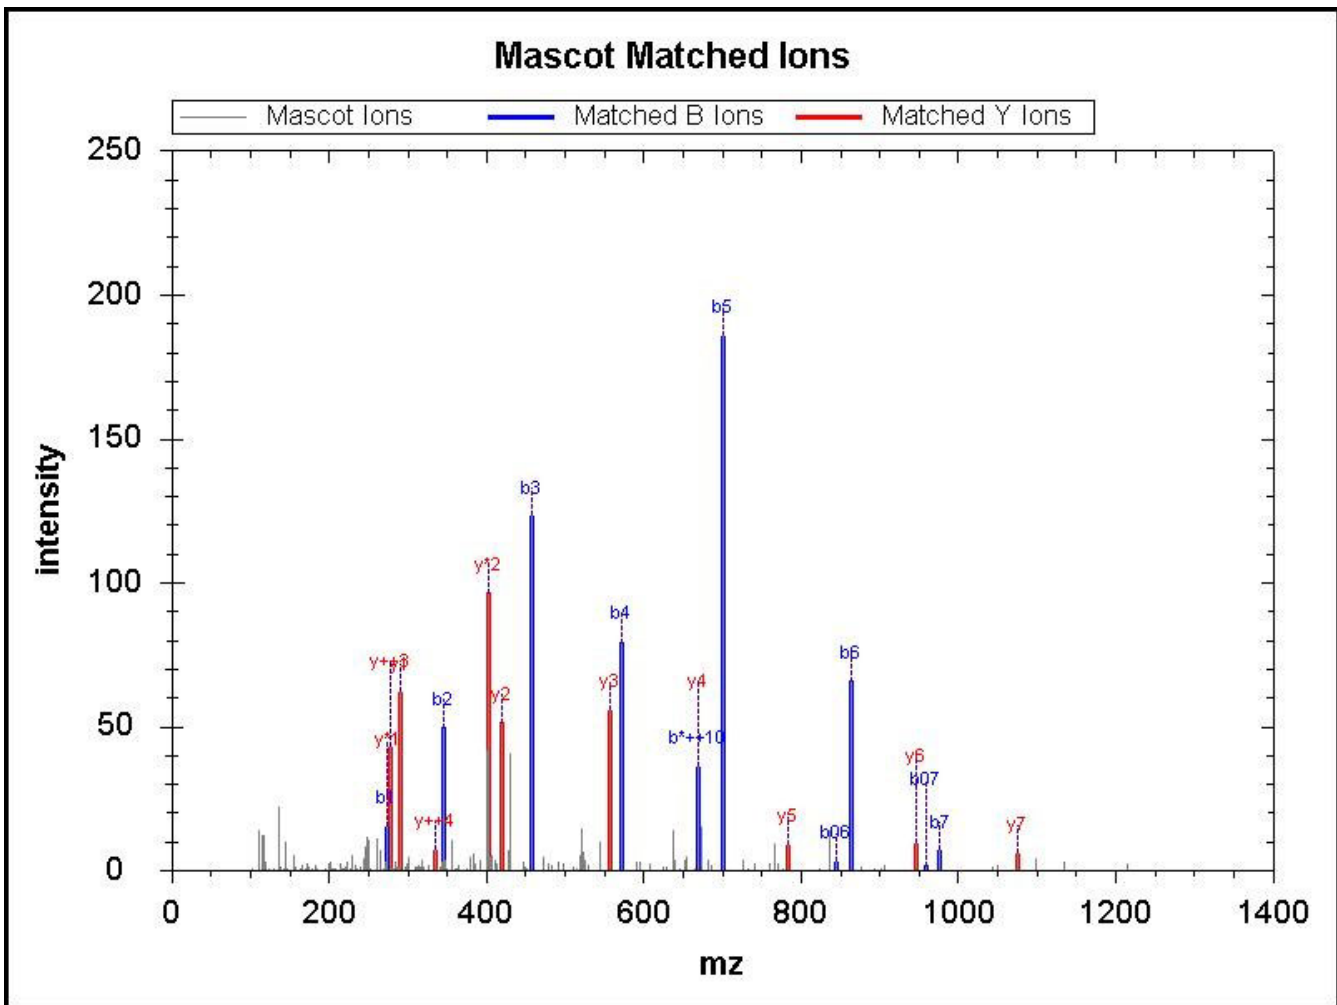

| No | b        | b++    | b*       | b*++   | b0       | b0++   | Seq | y        | y++    | y*       | y*++   | y0       | y0++   | RevNo |
|----|----------|--------|----------|--------|----------|--------|-----|----------|--------|----------|--------|----------|--------|-------|
| 1  | 274.15   | 137.58 |          |        | 256.14   | 128.57 | E   |          |        |          |        |          |        | 11    |
| 2  | 345.19   | 173.10 |          |        | 327.18   | 164.09 | A   | 1,371.81 | 686.41 | 1,354.79 | 677.90 | 1,353.80 | 677.40 | 10    |
| 3  | 458.27   | 229.64 |          |        | 440.26   | 220.63 | I   | 1,300.77 | 650.89 | 1,283.75 | 642.38 | 1,282.76 | 641.89 | 9     |
| 4  | 571.36   | 286.18 |          |        | 553.35   | 277.18 | L   | 1,187.69 | 594.35 | 1,170.66 | 585.84 | 1,169.68 | 585.34 | 8     |
| 5  | 700.40   | 350.70 |          |        | 682.39   | 341.70 | E   | 1,074.61 | 537.81 | 1,057.58 | 529.29 | 1,056.60 | 528.80 | 7     |
| 6  | 863.46   | 432.24 |          |        | 845.45   | 423.23 | Y   | 945.56   | 473.29 | 928.54   | 464.77 |          |        | 6     |
| 7  | 976.55   | 488.78 |          |        | 958.54   | 479.77 | I   | 782.50   | 391.75 | 765.47   | 383.24 |          |        | 5     |
| 8  | 1,089.63 | 545.32 |          |        | 1,071.62 | 536.31 | L   | 669.42   | 335.21 | 652.39   | 326.70 |          |        | 4     |
| 9  | 1,226.69 | 613.85 |          |        | 1,208.68 | 604.84 | H   | 556.33   | 278.67 | 539.31   | 270.16 |          |        | 3     |
| 10 | 1,354.75 | 677.88 | 1,337.72 | 669.36 | 1,336.74 | 668.87 | Q   | 419.27   | 210.14 | 402.25   | 201.63 |          |        | 2     |
| 11 |          |        |          |        |          |        | K   | 291.21   | 146.11 | 274.19   | 137.60 |          |        | 1     |

Query 75851 Hit 1

MS/MS Fragmentation of **GRPGSGTSGVDSLNFIESVK**

Found in **sp|Q8IXT5|RB12B\_HUMAN**, RNA-binding protein 12B OS=Homo sapiens GN=RBM12B PE=1 SV=2

Match to Query 75851: 2381.311 from (794.7774, 3+)

Title: 821: Sum of 2 scans in range 1783 (rt=49.921, f=4, i=555) to 1784 (rt=49.9464, f=4, i=556)

[D:\lab212\membrane\GraceJoyce\iTRAQ40.raw]

Data File: Submitted from 20120508-1(merge) by Mascot Daemon on JOYCE-VAIO

Monoisotopic mass of neutral peptide Mr(calc): 2381.311

Variable modifications:

K21 iTRAQ4plex (K)

Ions Score: 53.08 Expect: 0.003

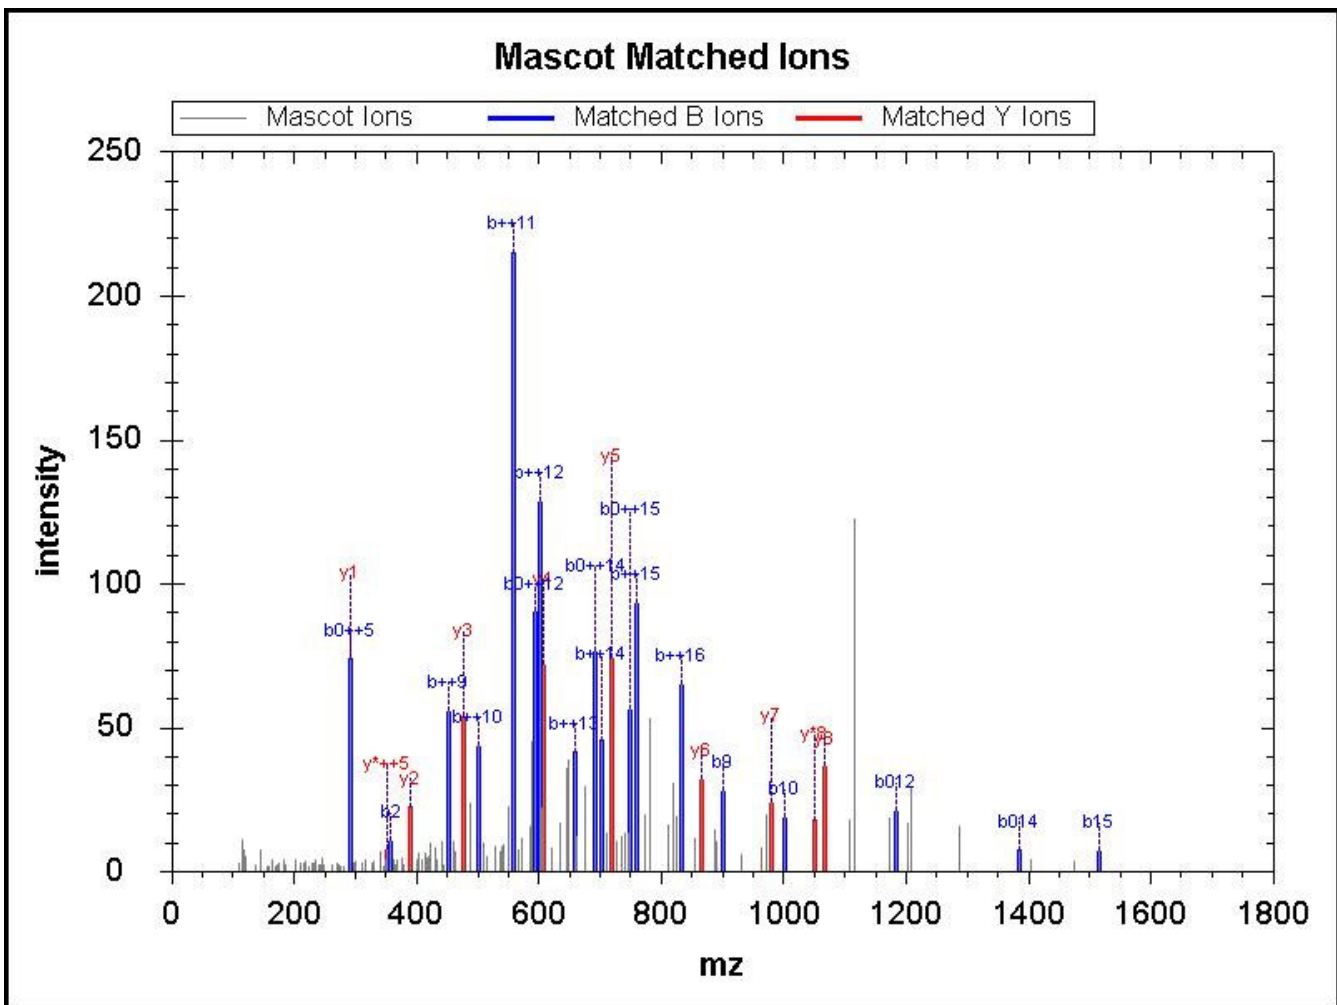

| No | b        | b++      | b*       | b*++     | b0       | b0++     | Seq | y        | y++      | y*       | y*++     | y0       | y0++     | RevNo |
|----|----------|----------|----------|----------|----------|----------|-----|----------|----------|----------|----------|----------|----------|-------|
| 1  | 202.13   | 101.57   |          |          |          |          | G   |          |          |          |          |          |          | 21    |
| 2  | 358.23   | 179.62   | 341.21   | 171.11   |          |          | R   | 2,181.13 | 1,091.07 | 2,164.10 | 1,082.55 | 2,163.12 | 1,082.06 | 20    |
| 3  | 455.28   | 228.15   | 438.26   | 219.63   |          |          | P   | 2,025.03 | 1,013.02 | 2,008.00 | 1,004.50 | 2,007.02 | 1,004.01 | 19    |
| 4  | 512.31   | 256.66   | 495.28   | 248.14   |          |          | G   | 1,927.97 | 964.49   | 1,910.95 | 955.98   | 1,909.96 | 955.48   | 18    |
| 5  | 599.34   | 300.17   | 582.31   | 291.66   | 581.33   | 291.17   | S   | 1,870.95 | 935.98   | 1,853.92 | 927.47   | 1,852.94 | 926.97   | 17    |
| 6  | 656.36   | 328.68   | 639.33   | 320.17   | 638.35   | 319.68   | G   | 1,783.92 | 892.46   | 1,766.89 | 883.95   | 1,765.91 | 883.46   | 16    |
| 7  | 757.41   | 379.21   | 740.38   | 370.69   | 739.40   | 370.20   | T   | 1,726.90 | 863.95   | 1,709.87 | 855.44   | 1,708.89 | 854.95   | 15    |
| 8  | 844.44   | 422.72   | 827.41   | 414.21   | 826.43   | 413.72   | S   | 1,625.85 | 813.43   | 1,608.82 | 804.92   | 1,607.84 | 804.42   | 14    |
| 9  | 901.46   | 451.23   | 884.43   | 442.72   | 883.45   | 442.23   | G   | 1,538.82 | 769.91   | 1,521.79 | 761.40   | 1,520.81 | 760.91   | 13    |
| 10 | 1,000.53 | 500.77   | 983.50   | 492.25   | 982.52   | 491.76   | V   | 1,481.80 | 741.40   | 1,464.77 | 732.89   | 1,463.79 | 732.40   | 12    |
| 11 | 1,115.56 | 558.28   | 1,098.53 | 549.77   | 1,097.55 | 549.28   | D   | 1,382.73 | 691.87   | 1,365.70 | 683.35   | 1,364.72 | 682.86   | 11    |
| 12 | 1,202.59 | 601.80   | 1,185.56 | 593.28   | 1,184.58 | 592.79   | S   | 1,267.70 | 634.35   | 1,250.67 | 625.84   | 1,249.69 | 625.35   | 10    |
| 13 | 1,315.67 | 658.34   | 1,298.65 | 649.83   | 1,297.66 | 649.33   | L   | 1,180.67 | 590.84   | 1,163.64 | 582.33   | 1,162.66 | 581.83   | 9     |
| 14 | 1,402.70 | 701.86   | 1,385.68 | 693.34   | 1,384.69 | 692.85   | S   | 1,067.59 | 534.30   | 1,050.56 | 525.78   | 1,049.57 | 525.29   | 8     |
| 15 | 1,516.75 | 758.88   | 1,499.72 | 750.36   | 1,498.74 | 749.87   | N   | 980.55   | 490.78   | 963.53   | 482.27   | 962.54   | 481.77   | 7     |
| 16 | 1,663.82 | 832.41   | 1,646.79 | 823.90   | 1,645.81 | 823.41   | F   | 866.51   | 433.76   | 849.48   | 425.25   | 848.50   | 424.75   | 6     |
| 17 | 1,776.90 | 888.95   | 1,759.87 | 880.44   | 1,758.89 | 879.95   | I   | 719.44   | 360.22   | 702.42   | 351.71   | 701.43   | 351.22   | 5     |
| 18 | 1,905.94 | 953.47   | 1,888.92 | 944.96   | 1,887.93 | 944.47   | E   | 606.36   | 303.68   | 589.33   | 295.17   | 588.35   | 294.68   | 4     |
| 19 | 1,992.97 | 996.99   | 1,975.95 | 988.48   | 1,974.96 | 987.99   | S   | 477.32   | 239.16   | 460.29   | 230.65   | 459.30   | 230.16   | 3     |
| 20 | 2,092.04 | 1,046.53 | 2,075.02 | 1,038.01 | 2,074.03 | 1,037.52 | V   | 390.28   | 195.65   | 373.26   | 187.13   |          |          | 2     |
| 21 |          |          |          |          |          |          | K   | 291.21   | 146.11   | 274.19   | 137.60   |          |          | 1     |

Query 46878 Hit 1

MS/MS Fragmentation of **GLHSQNFTQALLR**

Found in [sp|Q9Y4W2|LAS1L\\_HUMAN](#), Ribosomal biogenesis protein LAS1L OS=Homo sapiens GN=LAS1L PE=1 SV=2  
 Match to Query 46878: 1756.934 from (586.652, 3+)  
 Title: 534: Sum of 2 scans in range 1213 (rt=36.9269, f=4, i=351) to 1214 (rt=36.9523, f=4, i=352)  
 [D:\lab212\membrane\GraceJoyce\iTRAQ\_39\_2.raw]  
 Data File: Submitted from 20120508-1(merge) by Mascot Daemon on JOYCE-VAIO  
 Monoisotopic mass of neutral peptide Mr(calc): 1756.934  
 Variable modifications:  
 Ions Score: 52.95 Expect: 0.004

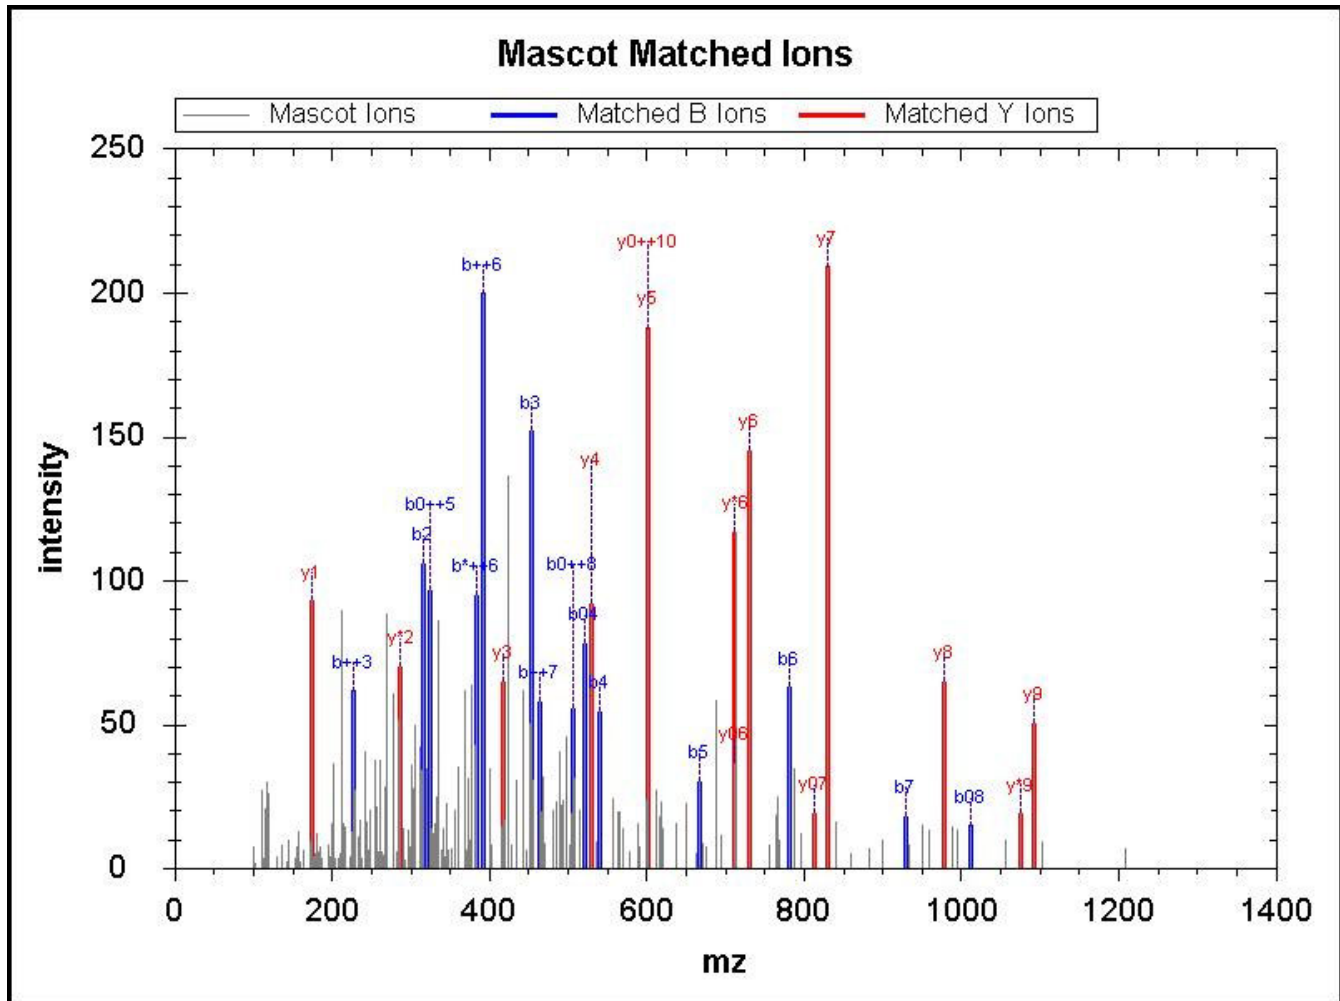

| No | b        | b++    | b*       | b*++   | b0       | b0++   | Seq | y        | y++    | y*       | y*++   | y0       | y0++   | RevNo |
|----|----------|--------|----------|--------|----------|--------|-----|----------|--------|----------|--------|----------|--------|-------|
| 1  | 202.13   | 101.57 |          |        |          |        | G   |          |        |          |        |          |        | 14    |
| 2  | 315.21   | 158.11 |          |        |          |        | L   | 1,556.82 | 778.91 | 1,539.79 | 770.40 | 1,538.81 | 769.91 | 13    |
| 3  | 452.27   | 226.64 |          |        |          |        | H   | 1,443.73 | 722.37 | 1,426.71 | 713.86 | 1,425.72 | 713.37 | 12    |
| 4  | 539.31   | 270.16 |          |        | 521.30   | 261.15 | S   | 1,306.67 | 653.84 | 1,289.65 | 645.33 | 1,288.66 | 644.84 | 11    |
| 5  | 667.36   | 334.19 | 650.34   | 325.67 | 649.35   | 325.18 | Q   | 1,219.64 | 610.33 | 1,202.62 | 601.81 | 1,201.63 | 601.32 | 10    |
| 6  | 781.41   | 391.21 | 764.38   | 382.69 | 763.40   | 382.20 | N   | 1,091.58 | 546.30 | 1,074.56 | 537.78 | 1,073.57 | 537.29 | 9     |
| 7  | 928.48   | 464.74 | 911.45   | 456.23 | 910.47   | 455.74 | F   | 977.54   | 489.27 | 960.51   | 480.76 | 959.53   | 480.27 | 8     |
| 8  | 1,029.52 | 515.27 | 1,012.50 | 506.75 | 1,011.51 | 506.26 | T   | 830.47   | 415.74 | 813.45   | 407.23 | 812.46   | 406.73 | 7     |
| 9  | 1,157.58 | 579.29 | 1,140.56 | 570.78 | 1,139.57 | 570.29 | Q   | 729.43   | 365.22 | 712.40   | 356.70 | 711.41   | 356.21 | 6     |
| 10 | 1,228.62 | 614.81 | 1,211.59 | 606.30 | 1,210.61 | 605.81 | A   | 601.37   | 301.19 | 584.34   | 292.67 | 583.36   | 292.18 | 5     |
| 11 | 1,341.70 | 671.36 | 1,324.68 | 662.84 | 1,323.69 | 662.35 | L   | 530.33   | 265.67 | 513.30   | 257.16 | 512.32   | 256.66 | 4     |
| 12 | 1,454.79 | 727.90 | 1,437.76 | 719.38 | 1,436.78 | 718.89 | L   | 417.25   | 209.13 | 400.22   | 200.61 | 399.24   | 200.12 | 3     |
| 13 | 1,583.83 | 792.42 | 1,566.80 | 783.91 | 1,565.82 | 783.41 | E   | 304.16   | 152.58 | 287.13   | 144.07 | 286.15   | 143.58 | 2     |
| 14 |          |        |          |        |          |        | R   | 175.12   | 88.06  | 158.09   | 79.55  |          |        | 1     |

Query 99878 Hit 1

MS/MS Fragmentation of [IEIMPELADSLVPMEIKPGISLATVSAVLHTK](#)

Found in [sp|Q9NV88|INT9\\_HUMAN](#), Integrator complex subunit 9 OS=Homo sapiens GN=INTS9 PE=1 SV=2

Match to Query 99878: 3834.229 from (959.5646, 4+)

Title: 1254: Sum of 2 scans in range 2695 (rt=70.429, f=3, i=432) to 2696 (rt=70.4544, f=3, i=433)

[D:\lab212\membrane\Grace\Joyce\iTRAQ40.raw]

Data File: Submitted from 20120508-1 (merge) by Mascot Daemon on JOYCE-VAIO

Monoisotopic mass of neutral peptide Mr(calc): 3834.229

Variable modifications:

K17 iTRAQ4plex (K)

K32 iTRAQ4plex (K)

Ions Score: 52.93 Expect: 0.000

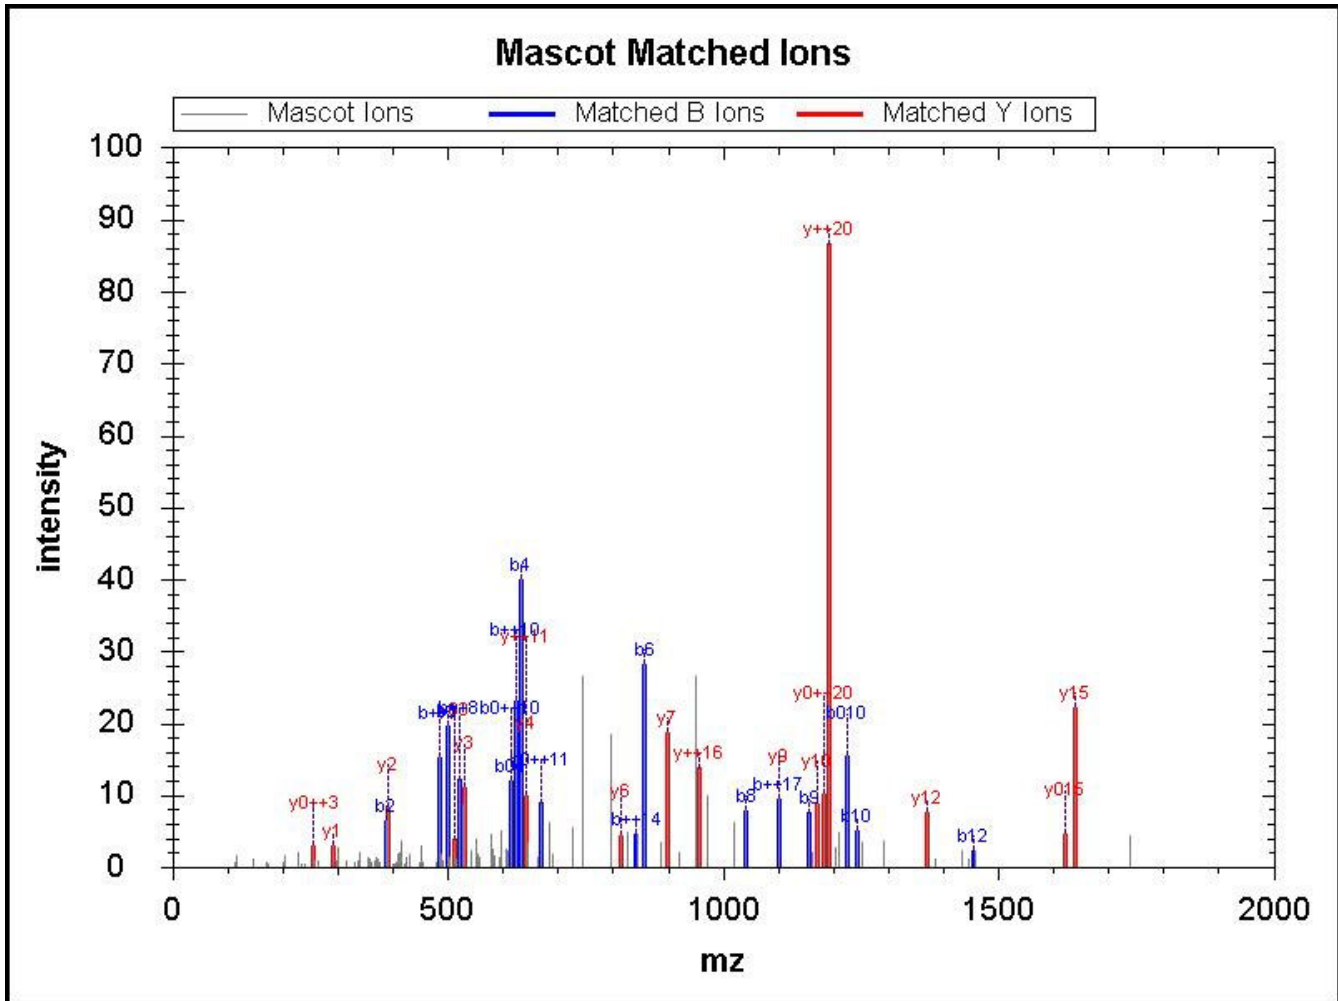

|    |          |          |          |          |          |          |   |          |          |          |          |          |          |    |
|----|----------|----------|----------|----------|----------|----------|---|----------|----------|----------|----------|----------|----------|----|
| 16 | 1,926.01 | 963.51   |          |          | 1,908.00 | 954.50   | I | 2,023.25 | 1,012.13 | 2,006.23 | 1,003.62 | 2,005.24 | 1,003.12 | 17 |
| 17 | 2,198.21 | 1,099.61 | 2,181.18 | 1,091.09 | 2,180.20 | 1,090.60 | K | 1,910.17 | 955.59   | 1,893.14 | 947.07   | 1,892.16 | 946.58   | 16 |
| 18 | 2,295.26 | 1,148.13 | 2,278.23 | 1,139.62 | 2,277.25 | 1,139.13 | P | 1,637.97 | 819.49   | 1,620.94 | 810.98   | 1,619.96 | 810.48   | 15 |
| 19 | 2,352.28 | 1,176.64 | 2,335.25 | 1,168.13 | 2,334.27 | 1,167.64 | G | 1,540.92 | 770.96   | 1,523.89 | 762.45   | 1,522.91 | 761.96   | 14 |
| 20 | 2,465.36 | 1,233.19 | 2,448.34 | 1,224.67 | 2,447.35 | 1,224.18 | I | 1,483.90 | 742.45   | 1,466.87 | 733.94   | 1,465.89 | 733.45   | 13 |
| 21 | 2,552.40 | 1,276.70 | 2,535.37 | 1,268.19 | 2,534.39 | 1,267.70 | S | 1,370.81 | 685.91   | 1,353.79 | 677.40   | 1,352.80 | 676.90   | 12 |
| 22 | 2,665.48 | 1,333.24 | 2,648.45 | 1,324.73 | 2,647.47 | 1,324.24 | L | 1,283.78 | 642.39   | 1,266.75 | 633.88   | 1,265.77 | 633.39   | 11 |
| 23 | 2,736.52 | 1,368.76 | 2,719.49 | 1,360.25 | 2,718.51 | 1,359.76 | A | 1,170.70 | 585.85   | 1,153.67 | 577.34   | 1,152.69 | 576.85   | 10 |
| 24 | 2,837.56 | 1,419.29 | 2,820.54 | 1,410.77 | 2,819.55 | 1,410.28 | T | 1,099.66 | 550.33   | 1,082.63 | 541.82   | 1,081.65 | 541.33   | 9  |
| 25 | 2,936.63 | 1,468.82 | 2,919.61 | 1,460.31 | 2,918.62 | 1,459.81 | V | 998.61   | 499.81   | 981.58   | 491.30   | 980.60   | 490.80   | 8  |
| 26 | 3,023.66 | 1,512.34 | 3,006.64 | 1,503.82 | 3,005.65 | 1,503.33 | S | 899.54   | 450.28   | 882.52   | 441.76   | 881.53   | 441.27   | 7  |
| 27 | 3,094.70 | 1,547.85 | 3,077.68 | 1,539.34 | 3,076.69 | 1,538.85 | A | 812.51   | 406.76   | 795.48   | 398.25   | 794.50   | 397.75   | 6  |
| 28 | 3,193.77 | 1,597.39 | 3,176.74 | 1,588.88 | 3,175.76 | 1,588.38 | V | 741.47   | 371.24   | 724.45   | 362.73   | 723.46   | 362.24   | 5  |
| 29 | 3,306.85 | 1,653.93 | 3,289.83 | 1,645.42 | 3,288.84 | 1,644.93 | L | 642.41   | 321.71   | 625.38   | 313.19   | 624.39   | 312.70   | 4  |
| 30 | 3,443.91 | 1,722.46 | 3,426.89 | 1,713.95 | 3,425.90 | 1,713.45 | H | 529.32   | 265.16   | 512.29   | 256.65   | 511.31   | 256.16   | 3  |
| 31 | 3,544.96 | 1,772.98 | 3,527.93 | 1,764.47 | 3,526.95 | 1,763.98 | T | 392.26   | 196.63   | 375.24   | 188.12   | 374.25   | 187.63   | 2  |
| 32 |          |          |          |          |          |          | K | 291.21   | 146.11   | 274.19   | 137.60   |          |          | 1  |

Query 13488 Hit 1

MS/MS Fragmentation of **NGDIVSSAAR**

Found in **sp|Q07968|F13B\_MOUSE**, Coagulation factor XIII B chain OS=Mus musculus GN=F13b PE=1 SV=1

Match to Query 13488: 1133.579from(567.7966,2+)

Title: 130: Sum of 2 scans in range 500 (rt=20.3521, f=4, i=65) to 501 (rt=20.3775, f=4, i=66)

[D:\lab212\membrane\Grace\Joyce\iTRAQ\_22\_1.raw]

Data File:Submitted from 20120508-1(merge) by Mascot Daemon on JOYCE-VAIO

Monoisotopic mass of neutral peptide Mr(calc): 1133.579

Variable modifications:

N1 :Deamidated (NQ)

Ions Score: 52.89 Expect: 0.004

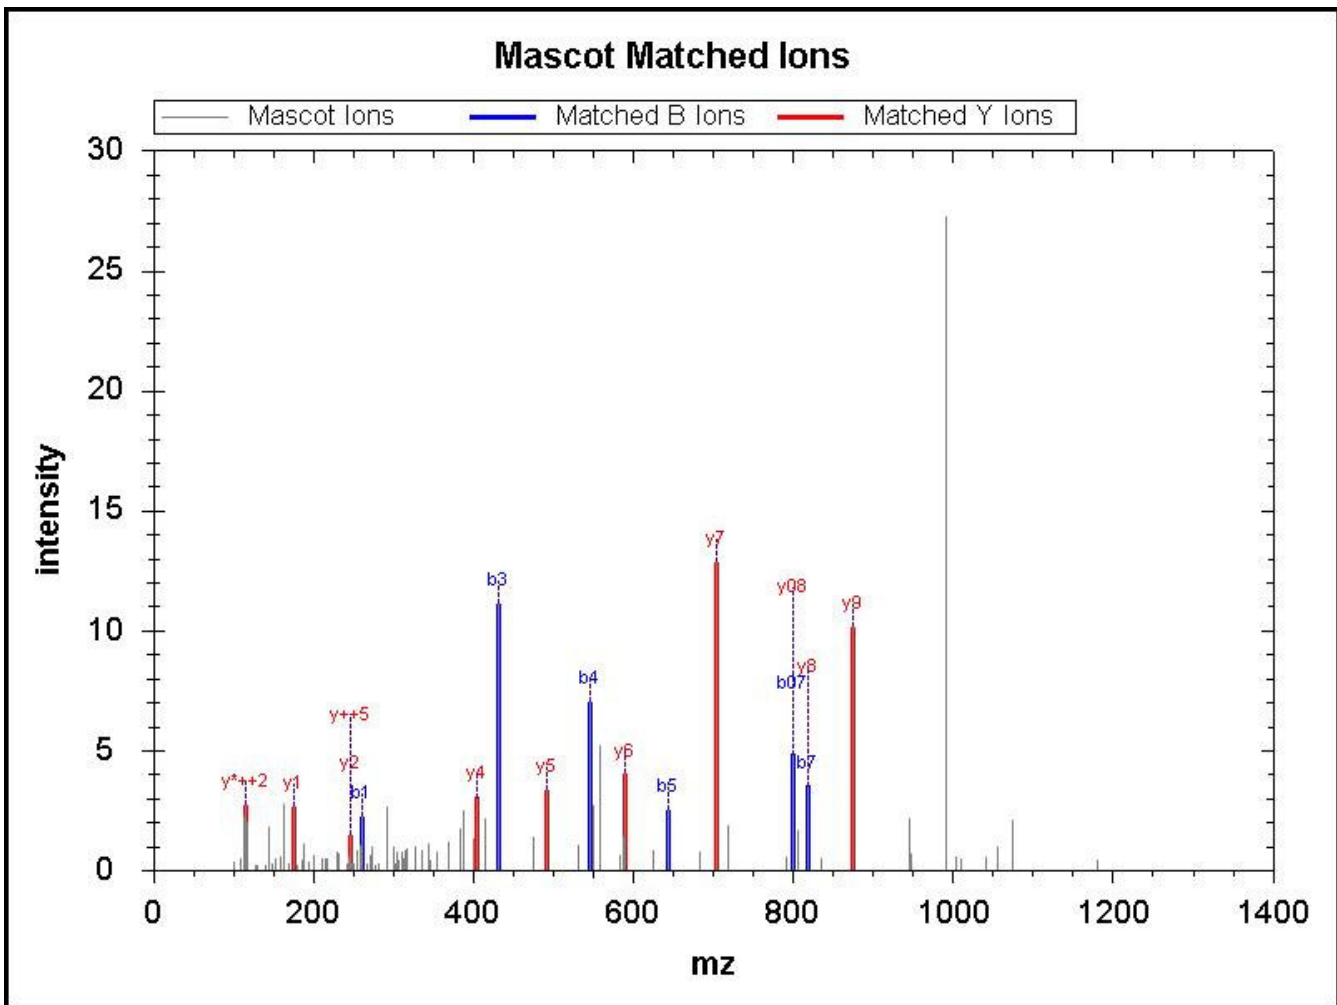

| No | b      | b++    | b*     | b*++   | b0     | b0++   | Seq | y      | y++    | y*     | y*++   | y0     | y0++   | RevNo |
|----|--------|--------|--------|--------|--------|--------|-----|--------|--------|--------|--------|--------|--------|-------|
| 1  | 260.14 | 130.57 | 243.11 | 122.06 |        |        | N   |        |        |        |        |        |        | 10    |
| 2  | 317.16 | 159.08 | 300.13 | 150.57 |        |        | G   | 875.46 | 438.23 | 858.43 | 429.72 | 857.45 | 429.23 | 9     |
| 3  | 432.18 | 216.60 | 415.16 | 208.08 | 414.17 | 207.59 | D   | 818.44 | 409.72 | 801.41 | 401.21 | 800.43 | 400.72 | 8     |
| 4  | 545.27 | 273.14 | 528.24 | 264.62 | 527.26 | 264.13 | I   | 703.41 | 352.21 | 686.38 | 343.70 | 685.40 | 343.20 | 7     |
| 5  | 644.34 | 322.67 | 627.31 | 314.16 | 626.33 | 313.67 | V   | 590.33 | 295.67 | 573.30 | 287.15 | 572.32 | 286.66 | 6     |
| 6  | 731.37 | 366.19 | 714.34 | 357.67 | 713.36 | 357.18 | S   | 491.26 | 246.13 | 474.23 | 237.62 | 473.25 | 237.13 | 5     |
| 7  | 818.40 | 409.70 | 801.37 | 401.19 | 800.39 | 400.70 | S   | 404.23 | 202.62 | 387.20 | 194.10 | 386.21 | 193.61 | 4     |
| 8  | 889.44 | 445.22 | 872.41 | 436.71 | 871.43 | 436.22 | A   | 317.19 | 159.10 | 300.17 | 150.59 |        |        | 3     |
| 9  | 960.48 | 480.74 | 943.45 | 472.23 | 942.46 | 471.74 | A   | 246.16 | 123.58 | 229.13 | 115.07 |        |        | 2     |
| 10 |        |        |        |        |        |        | R   | 175.12 | 88.06  | 158.09 | 79.55  |        |        | 1     |

Query 75619 Hit 1

MS/MS Fragmentation of **INLLSHDYGDIVAQELLYR**

Found in **sp|Q5EB52|MEST\_HUMAN**, Mesoderm-specific transcript homolog protein OS=Homo sapiens GN=MEST PE=2 SV=2

Match to Query 75619: 2375.26from(792.7606,3+)

Title: 959: Sum of 2 scans in range 2131 (rt=57.3921, f=4, i=645) to 2132 (rt=57.4175, f=4, i=646)

[D:\lab212\membrane\GraceJoyce\iTRAQ\_33\_1.raw]

Data File: Submitted from 20120508-1(merge) by Mascot Daemon on JOYCE-VAIO

Monoisotopic mass of neutral peptide Mr(calc): 2375.26

Variable modifications:

Ions Score: 52.78 Expect: 0.004



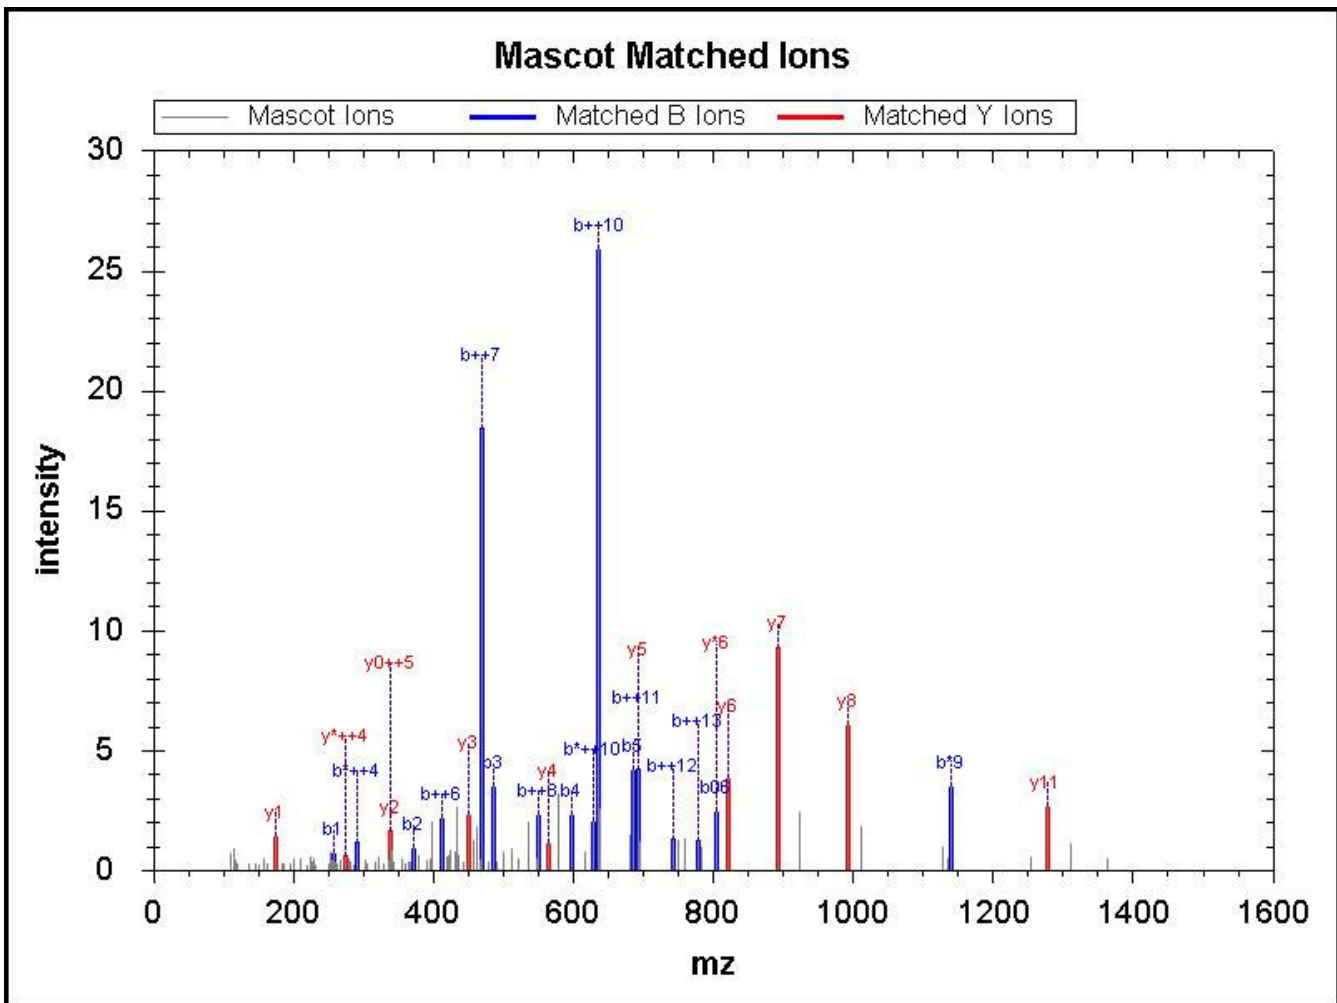

| No | b        | b++      | b*       | b*++     | b0       | b0++     | Seq | y        | y++      | y*       | y*++     | y0       | y0++     | RevNo |
|----|----------|----------|----------|----------|----------|----------|-----|----------|----------|----------|----------|----------|----------|-------|
| 1  | 258.19   | 129.60   |          |          |          |          | I   |          |          |          |          |          |          | 19    |
| 2  | 372.24   | 186.62   | 355.21   | 178.11   |          |          | N   | 2,119.08 | 1,060.04 | 2,102.06 | 1,051.53 | 2,101.07 | 1,051.04 | 18    |
| 3  | 485.32   | 243.16   | 468.29   | 234.65   |          |          | L   | 2,005.04 | 1,003.02 | 1,988.01 | 994.51   | 1,987.03 | 994.02   | 17    |
| 4  | 598.40   | 299.71   | 581.38   | 291.19   |          |          | L   | 1,891.95 | 946.48   | 1,874.93 | 937.97   | 1,873.94 | 937.48   | 16    |
| 5  | 685.44   | 343.22   | 668.41   | 334.71   | 667.43   | 334.22   | S   | 1,778.87 | 889.94   | 1,761.84 | 881.43   | 1,760.86 | 880.93   | 15    |
| 6  | 822.50   | 411.75   | 805.47   | 403.24   | 804.48   | 402.75   | H   | 1,691.84 | 846.42   | 1,674.81 | 837.91   | 1,673.83 | 837.42   | 14    |
| 7  | 937.52   | 469.26   | 920.50   | 460.75   | 919.51   | 460.26   | D   | 1,554.78 | 777.89   | 1,537.75 | 769.38   | 1,536.77 | 768.89   | 13    |
| 8  | 1,100.59 | 550.80   | 1,083.56 | 542.28   | 1,082.58 | 541.79   | Y   | 1,439.75 | 720.38   | 1,422.73 | 711.87   | 1,421.74 | 711.37   | 12    |
| 9  | 1,157.61 | 579.31   | 1,140.58 | 570.79   | 1,139.60 | 570.30   | G   | 1,276.69 | 638.85   | 1,259.66 | 630.34   | 1,258.68 | 629.84   | 11    |
| 10 | 1,272.63 | 636.82   | 1,255.61 | 628.31   | 1,254.62 | 627.82   | D   | 1,219.67 | 610.34   | 1,202.64 | 601.82   | 1,201.66 | 601.33   | 10    |
| 11 | 1,385.72 | 693.36   | 1,368.69 | 684.85   | 1,367.71 | 684.36   | I   | 1,104.64 | 552.82   | 1,087.61 | 544.31   | 1,086.63 | 543.82   | 9     |
| 12 | 1,484.79 | 742.90   | 1,467.76 | 734.38   | 1,466.78 | 733.89   | V   | 991.56   | 496.28   | 974.53   | 487.77   | 973.55   | 487.28   | 8     |
| 13 | 1,555.82 | 778.42   | 1,538.80 | 769.90   | 1,537.81 | 769.41   | A   | 892.49   | 446.75   | 875.46   | 438.23   | 874.48   | 437.74   | 7     |
| 14 | 1,683.88 | 842.44   | 1,666.86 | 833.93   | 1,665.87 | 833.44   | Q   | 821.45   | 411.23   | 804.42   | 402.72   | 803.44   | 402.22   | 6     |
| 15 | 1,812.92 | 906.97   | 1,795.90 | 898.45   | 1,794.91 | 897.96   | E   | 693.39   | 347.20   | 676.37   | 338.69   | 675.38   | 338.19   | 5     |
| 16 | 1,926.01 | 963.51   | 1,908.98 | 954.99   | 1,908.00 | 954.50   | L   | 564.35   | 282.68   | 547.32   | 274.17   |          |          | 4     |
| 17 | 2,039.09 | 1,020.05 | 2,022.07 | 1,011.54 | 2,021.08 | 1,011.04 | L   | 451.27   | 226.14   | 434.24   | 217.62   |          |          | 3     |
| 18 | 2,202.16 | 1,101.58 | 2,185.13 | 1,093.07 | 2,184.15 | 1,092.58 | Y   | 338.18   | 169.59   | 321.16   | 161.08   |          |          | 2     |
| 19 |          |          |          |          |          |          | R   | 175.12   | 88.06    | 158.09   | 79.55    |          |          | 1     |

Query 71528 Hit 1

MS/MS Fragmentation of **AMEAVLTGLVEAALGPEVLSR**

Found in **sp|Q9Y4R8|TELO2\_HUMAN**, Telomere length regulation protein TEL2 homolog OS=Homo sapiens GN=TELO2 PE=1 SV=2

Match to Query 71528: 2269.247from(757.4229,3+)

Title: 1406: Sum of 2 scans in range 3343 (rt=83.9733, f=3, i=504) to 3344 (rt=83.9987, f=3, i=505)

[D:\lab212\membrane\Grace\Joyce\20120320\_iTRAQ\_20-1.raw]

Data File: Submitted from 20120508-1(merge) by Mascot Daemon on JOYCE-VAIO

Monoisotopic mass of neutral peptide Mr(calc): 2269.247

Variable modifications:

Ions Score: 52.78 Expect: 0.003

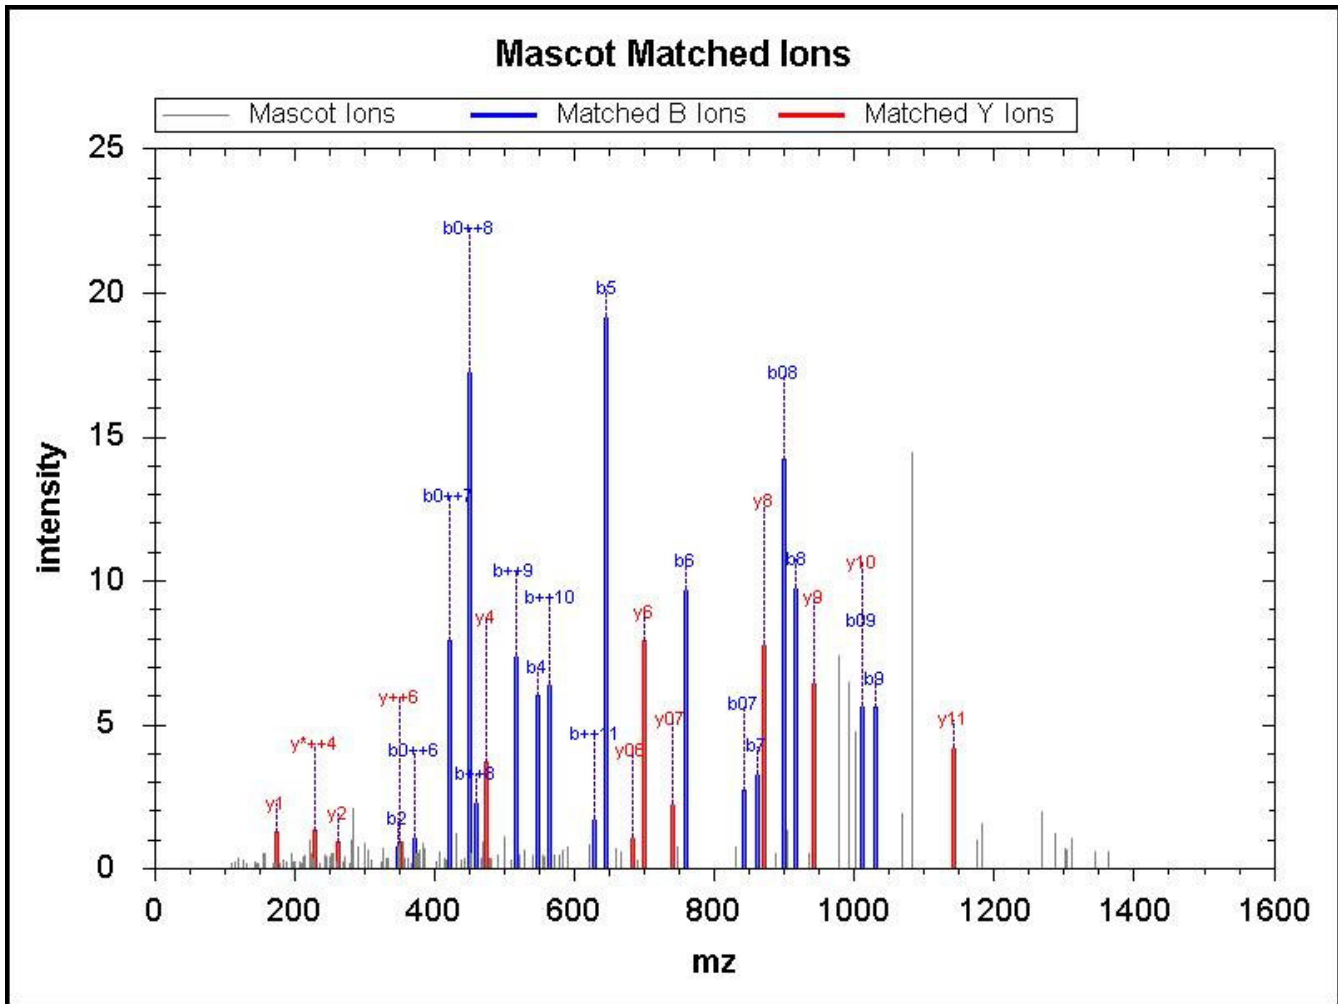

| No | b        | b++      | b0       | b0++   | Seq | y        | y++      | y*       | y*++     | y0       | y0++     | RevNo |
|----|----------|----------|----------|--------|-----|----------|----------|----------|----------|----------|----------|-------|
| 1  | 216.15   | 108.58   |          |        | A   |          |          |          |          |          |          | 21    |
| 2  | 347.19   | 174.10   |          |        | M   | 2,055.12 | 1,028.06 | 2,038.09 | 1,019.55 | 2,037.10 | 1,019.06 | 20    |
| 3  | 476.23   | 238.62   | 458.22   | 229.61 | E   | 1,924.07 | 962.54   | 1,907.05 | 954.03   | 1,906.06 | 953.54   | 19    |
| 4  | 547.27   | 274.14   | 529.26   | 265.13 | A   | 1,795.03 | 898.02   | 1,778.01 | 889.51   | 1,777.02 | 889.01   | 18    |
| 5  | 646.34   | 323.67   | 628.32   | 314.67 | V   | 1,724.00 | 862.50   | 1,706.97 | 853.99   | 1,705.98 | 853.50   | 17    |
| 6  | 759.42   | 380.21   | 741.41   | 371.21 | L   | 1,624.93 | 812.97   | 1,607.90 | 804.45   | 1,606.92 | 803.96   | 16    |
| 7  | 860.47   | 430.74   | 842.46   | 421.73 | T   | 1,511.84 | 756.43   | 1,494.82 | 747.91   | 1,493.83 | 747.42   | 15    |
| 8  | 917.49   | 459.25   | 899.48   | 450.24 | G   | 1,410.80 | 705.90   | 1,393.77 | 697.39   | 1,392.78 | 696.90   | 14    |
| 9  | 1,030.57 | 515.79   | 1,012.56 | 506.78 | L   | 1,353.77 | 677.39   | 1,336.75 | 668.88   | 1,335.76 | 668.39   | 13    |
| 10 | 1,129.64 | 565.32   | 1,111.63 | 556.32 | V   | 1,240.69 | 620.85   | 1,223.66 | 612.34   | 1,222.68 | 611.84   | 12    |
| 11 | 1,258.68 | 629.85   | 1,240.67 | 620.84 | E   | 1,141.62 | 571.31   | 1,124.59 | 562.80   | 1,123.61 | 562.31   | 11    |
| 12 | 1,329.72 | 665.36   | 1,311.71 | 656.36 | A   | 1,012.58 | 506.79   | 995.55   | 498.28   | 994.57   | 497.79   | 10    |
| 13 | 1,400.76 | 700.88   | 1,382.75 | 691.88 | A   | 941.54   | 471.27   | 924.51   | 462.76   | 923.53   | 462.27   | 9     |
| 14 | 1,513.84 | 757.42   | 1,495.83 | 748.42 | L   | 870.50   | 435.76   | 853.48   | 427.24   | 852.49   | 426.75   | 8     |
| 15 | 1,570.86 | 785.94   | 1,552.85 | 776.93 | G   | 757.42   | 379.21   | 740.39   | 370.70   | 739.41   | 370.21   | 7     |
| 16 | 1,667.92 | 834.46   | 1,649.91 | 825.46 | P   | 700.40   | 350.70   | 683.37   | 342.19   | 682.39   | 341.70   | 6     |
| 17 | 1,796.96 | 898.98   | 1,778.95 | 889.98 | E   | 603.35   | 302.18   | 586.32   | 293.66   | 585.34   | 293.17   | 5     |
| 18 | 1,896.03 | 948.52   | 1,878.02 | 939.51 | V   | 474.30   | 237.66   | 457.28   | 229.14   | 456.29   | 228.65   | 4     |
| 19 | 2,009.11 | 1,005.06 | 1,991.10 | 996.05 | L   | 375.24   | 188.12   | 358.21   | 179.61   | 357.22   | 179.12   | 3     |

|    |          |          |          |          |   |        |        |        |        |        |        |   |
|----|----------|----------|----------|----------|---|--------|--------|--------|--------|--------|--------|---|
| 20 | 2,096.14 | 1,048.58 | 2,078.13 | 1,039.57 | S | 262.15 | 131.58 | 245.12 | 123.07 | 244.14 | 122.57 | 2 |
| 21 |          |          |          |          | R | 175.12 | 88.06  | 158.09 | 79.55  |        |        | 1 |

Query 58801 Hit 1

MS/MS Fragmentation of **ELHAPLTVVADGLFSK**

Found in **sp|Q14534|ERG1\_HUMAN**, Squalene monooxygenase OS=Homo sapiens GN=SQLE PE=2 SV=3

Match to Query 58801: 1984.118from(662.3799,3+)

Title: 797: Sum of 2 scans in range 1799 (rt=49.7812, f=4, i=511) to 1800 (rt=49.8066, f=4, i=512)

[D:\lab212\membrane\GraceJoyce\iTRAQ\_38\_2.raw]

Data File:Submitted from 20120508-1(merge) by Mascot Daemon on JOYCE-VAIO

Monoisotopic mass of neutral peptide Mr(calc): 1984.118

Variable modifications:

K16 iTRAQ4plex (K)

Ions Score: 52.72 Expect: 0.003

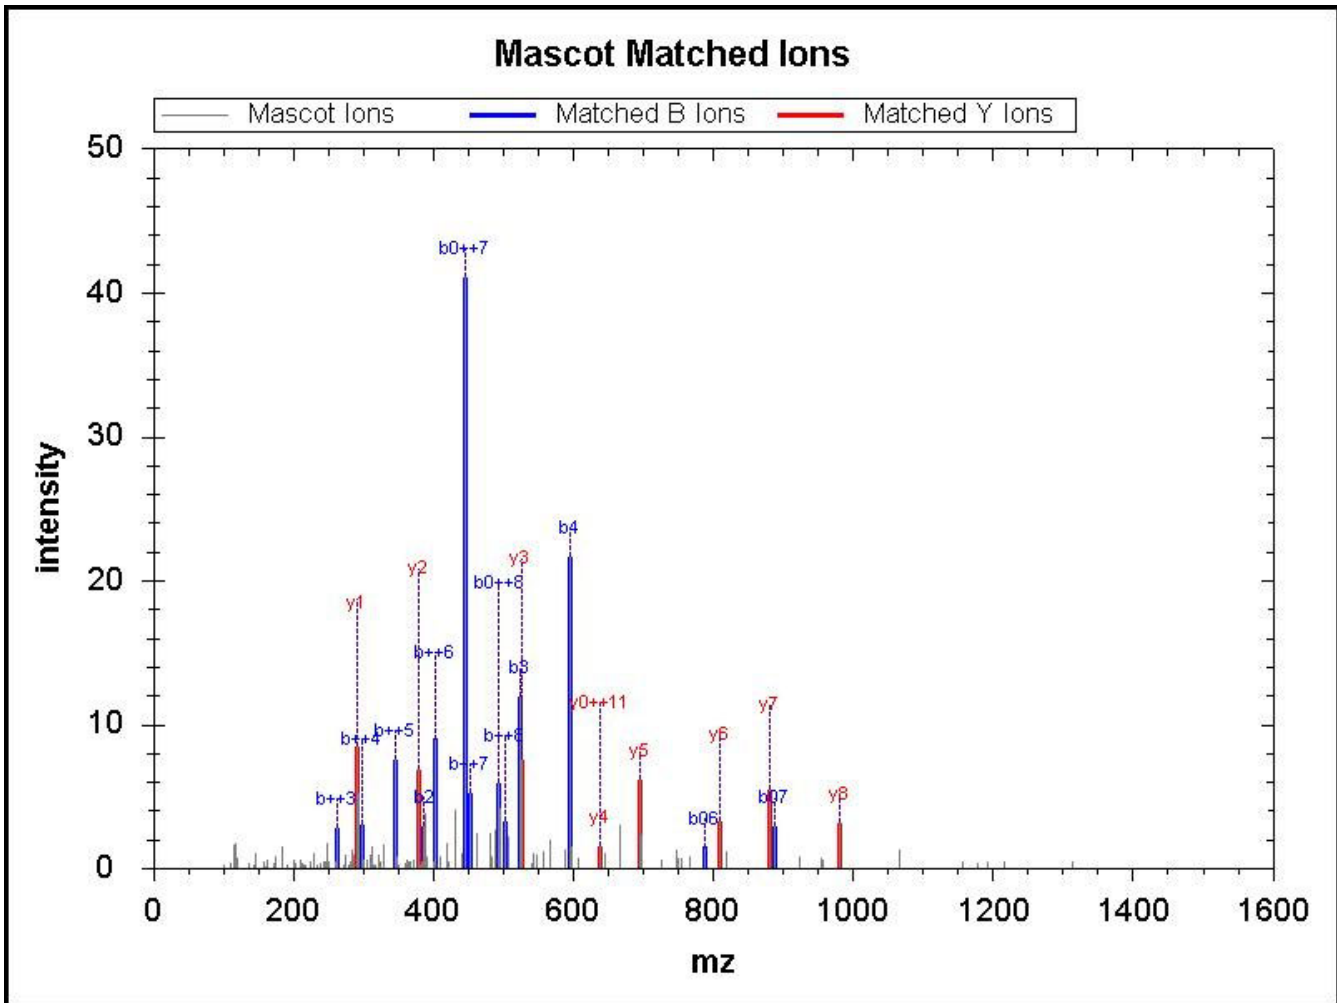

| No | b        | b++    | b0       | b0++   | Seq | y        | y++    | y*       | y*++   | y0       | y0++   | RevNo |
|----|----------|--------|----------|--------|-----|----------|--------|----------|--------|----------|--------|-------|
| 1  | 274.15   | 137.58 | 256.14   | 128.57 | E   |          |        |          |        |          |        | 16    |
| 2  | 387.24   | 194.12 | 369.23   | 185.12 | L   | 1,711.99 | 856.50 | 1,694.96 | 847.98 | 1,693.98 | 847.49 | 15    |
| 3  | 524.29   | 262.65 | 506.28   | 253.65 | H   | 1,598.90 | 799.95 | 1,581.88 | 791.44 | 1,580.89 | 790.95 | 14    |
| 4  | 595.33   | 298.17 | 577.32   | 289.16 | A   | 1,461.84 | 731.43 | 1,444.82 | 722.91 | 1,443.83 | 722.42 | 13    |
| 5  | 692.38   | 346.70 | 674.37   | 337.69 | P   | 1,390.81 | 695.91 | 1,373.78 | 687.39 | 1,372.80 | 686.90 | 12    |
| 6  | 805.47   | 403.24 | 787.46   | 394.23 | L   | 1,293.75 | 647.38 | 1,276.73 | 638.87 | 1,275.74 | 638.38 | 11    |
| 7  | 906.52   | 453.76 | 888.51   | 444.76 | T   | 1,180.67 | 590.84 | 1,163.64 | 582.33 | 1,162.66 | 581.83 | 10    |
| 8  | 1,005.58 | 503.30 | 987.57   | 494.29 | V   | 1,079.62 | 540.31 | 1,062.60 | 531.80 | 1,061.61 | 531.31 | 9     |
| 9  | 1,104.65 | 552.83 | 1,086.64 | 543.83 | V   | 980.55   | 490.78 | 963.53   | 482.27 | 962.54   | 481.77 | 8     |
| 10 | 1,175.69 | 588.35 | 1,157.68 | 579.34 | A   | 881.48   | 441.25 | 864.46   | 432.73 | 863.47   | 432.24 | 7     |
| 11 | 1,290.72 | 645.86 | 1,272.71 | 636.86 | D   | 810.45   | 405.73 | 793.42   | 397.21 | 792.44   | 396.72 | 6     |

|    |          |        |          |        |   |        |        |        |        |        |        |   |
|----|----------|--------|----------|--------|---|--------|--------|--------|--------|--------|--------|---|
| 12 | 1,347.74 | 674.37 | 1,329.73 | 665.37 | G | 695.42 | 348.21 | 678.39 | 339.70 | 677.41 | 339.21 | 5 |
| 13 | 1,460.82 | 730.92 | 1,442.81 | 721.91 | L | 638.40 | 319.70 | 621.37 | 311.19 | 620.39 | 310.70 | 4 |
| 14 | 1,607.89 | 804.45 | 1,589.88 | 795.44 | F | 525.32 | 263.16 | 508.29 | 254.65 | 507.30 | 254.16 | 3 |
| 15 | 1,694.92 | 847.97 | 1,676.91 | 838.96 | S | 378.25 | 189.63 | 361.22 | 181.11 | 360.24 | 180.62 | 2 |
| 16 |          |        |          |        | K | 291.21 | 146.11 | 274.19 | 137.60 |        |        | 1 |

Query 86862 Hit 1

MS/MS Fragmentation of **GIELAYLEQLHGQHEAWLIHK**

Found in **sp|Q16854|DGUOK\_HUMAN**, Deoxyguanosine kinase

Match to Query 86862: 2772.495 from (694.1311, 4+)

Title: 705: Scan 1761 (rt=48.3461, f=3, i=242) [D:\lab212\membrane\Grace\Joyce\iTRAQ\_51\_2.raw]

Data File: Submitted from 20120508-1(merge) by Mascot Daemon on JOYCE-VAIO

Monoisotopic mass of neutral peptide Mr(calc): 2772.495

Variable modifications:

K21 iTRAQ4plex (K)

Ions Score: 52.52 Expect: 0.003

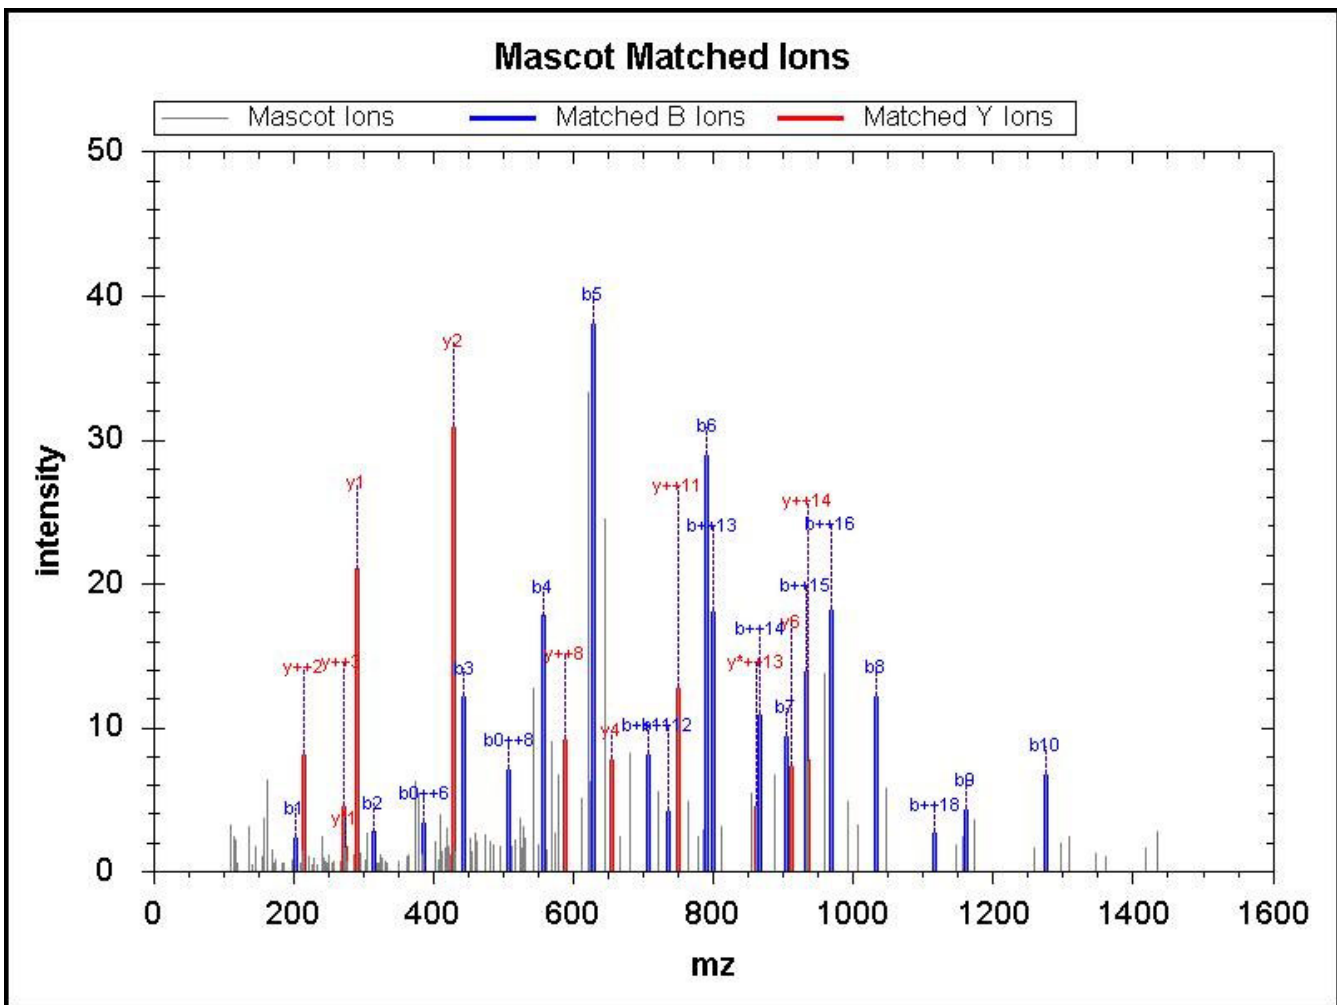

| No | b        | b++    | b* | b*++ | b0       | b0++   | Seq | y        | y++      | y*       | y*++     | y0       | y0++     | RevNo |
|----|----------|--------|----|------|----------|--------|-----|----------|----------|----------|----------|----------|----------|-------|
| 1  | 202.13   | 101.57 |    |      |          |        | G   |          |          |          |          |          |          | 21    |
| 2  | 315.21   | 158.11 |    |      |          |        | I   | 2,572.38 | 1,286.69 | 2,555.35 | 1,278.18 | 2,554.37 | 1,277.69 | 20    |
| 3  | 444.26   | 222.63 |    |      | 426.25   | 213.63 | E   | 2,459.30 | 1,230.15 | 2,442.27 | 1,221.64 | 2,441.28 | 1,221.15 | 19    |
| 4  | 557.34   | 279.17 |    |      | 539.33   | 270.17 | L   | 2,330.25 | 1,165.63 | 2,313.23 | 1,157.12 | 2,312.24 | 1,156.62 | 18    |
| 5  | 628.38   | 314.69 |    |      | 610.37   | 305.69 | A   | 2,217.17 | 1,109.09 | 2,200.14 | 1,100.57 | 2,199.16 | 1,100.08 | 17    |
| 6  | 791.44   | 396.22 |    |      | 773.43   | 387.22 | Y   | 2,146.13 | 1,073.57 | 2,129.10 | 1,065.06 | 2,128.12 | 1,064.56 | 16    |
| 7  | 904.53   | 452.77 |    |      | 886.52   | 443.76 | L   | 1,983.07 | 992.04   | 1,966.04 | 983.52   | 1,965.06 | 983.03   | 15    |
| 8  | 1,033.57 | 517.29 |    |      | 1,015.56 | 508.28 | E   | 1,869.98 | 935.50   | 1,852.96 | 926.98   | 1,851.97 | 926.49   | 14    |

|    |          |          |          |          |          |          |   |          |        |          |        |          |        |    |
|----|----------|----------|----------|----------|----------|----------|---|----------|--------|----------|--------|----------|--------|----|
| 9  | 1,161.63 | 581.32   | 1,144.60 | 572.80   | 1,143.62 | 572.31   | Q | 1,740.94 | 870.97 | 1,723.92 | 862.46 | 1,722.93 | 861.97 | 13 |
| 10 | 1,274.71 | 637.86   | 1,257.68 | 629.35   | 1,256.70 | 628.85   | L | 1,612.88 | 806.95 | 1,595.86 | 798.43 | 1,594.87 | 797.94 | 12 |
| 11 | 1,411.77 | 706.39   | 1,394.74 | 697.88   | 1,393.76 | 697.38   | H | 1,499.80 | 750.40 | 1,482.77 | 741.89 | 1,481.79 | 741.40 | 11 |
| 12 | 1,468.79 | 734.90   | 1,451.77 | 726.39   | 1,450.78 | 725.89   | G | 1,362.74 | 681.87 | 1,345.71 | 673.36 | 1,344.73 | 672.87 | 10 |
| 13 | 1,596.85 | 798.93   | 1,579.82 | 790.42   | 1,578.84 | 789.92   | Q | 1,305.72 | 653.36 | 1,288.69 | 644.85 | 1,287.71 | 644.36 | 9  |
| 14 | 1,733.91 | 867.46   | 1,716.88 | 858.95   | 1,715.90 | 858.45   | H | 1,177.66 | 589.33 | 1,160.63 | 580.82 | 1,159.65 | 580.33 | 8  |
| 15 | 1,862.95 | 931.98   | 1,845.93 | 923.47   | 1,844.94 | 922.97   | E | 1,040.60 | 520.80 | 1,023.57 | 512.29 | 1,022.59 | 511.80 | 7  |
| 16 | 1,933.99 | 967.50   | 1,916.96 | 958.98   | 1,915.98 | 958.49   | A | 911.56   | 456.28 | 894.53   | 447.77 |          |        | 6  |
| 17 | 2,120.07 | 1,060.54 | 2,103.04 | 1,052.02 | 2,102.06 | 1,051.53 | W | 840.52   | 420.76 | 823.49   | 412.25 |          |        | 5  |
| 18 | 2,233.15 | 1,117.08 | 2,216.13 | 1,108.57 | 2,215.14 | 1,108.07 | L | 654.44   | 327.72 | 637.42   | 319.21 |          |        | 4  |
| 19 | 2,346.24 | 1,173.62 | 2,329.21 | 1,165.11 | 2,328.23 | 1,164.62 | I | 541.36   | 271.18 | 524.33   | 262.67 |          |        | 3  |
| 20 | 2,483.30 | 1,242.15 | 2,466.27 | 1,233.64 | 2,465.28 | 1,233.15 | H | 428.27   | 214.64 | 411.25   | 206.13 |          |        | 2  |
| 21 |          |          |          |          |          |          | K | 291.21   | 146.11 | 274.19   | 137.60 |          |        | 1  |

Query 87631 Hit 1

MS/MS Fragmentation of **KVFSDVMEDLYNYINPHNGK**

Found in [sp|P23921|RIR1\\_HUMAN](#), Ribonucleoside-diphosphate reductase large subunit OS=Homo sapiens GN=RRM1 PE=1 SV=1

Match to Query 87631: 2815.423from(704.863,4+)

Title: 1077: Scan 2334 (rt=62.2012, f=2, i=380) [D:\lab212\membrane\Grace\Joyce\iTRAQ\_49\_2.raw]

Data File: Submitted from 20120508-1(merge) by Mascot Daemon on JOYCE-VAIO

Monoisotopic mass of neutral peptide Mr(calc): 2815.423

Variable modifications:

K1 :iTRAQ4plex (K)

N18 :Deamidated (NQ)

K20 :iTRAQ4plex (K)

Ions Score: 52.34 Expect: 0.005

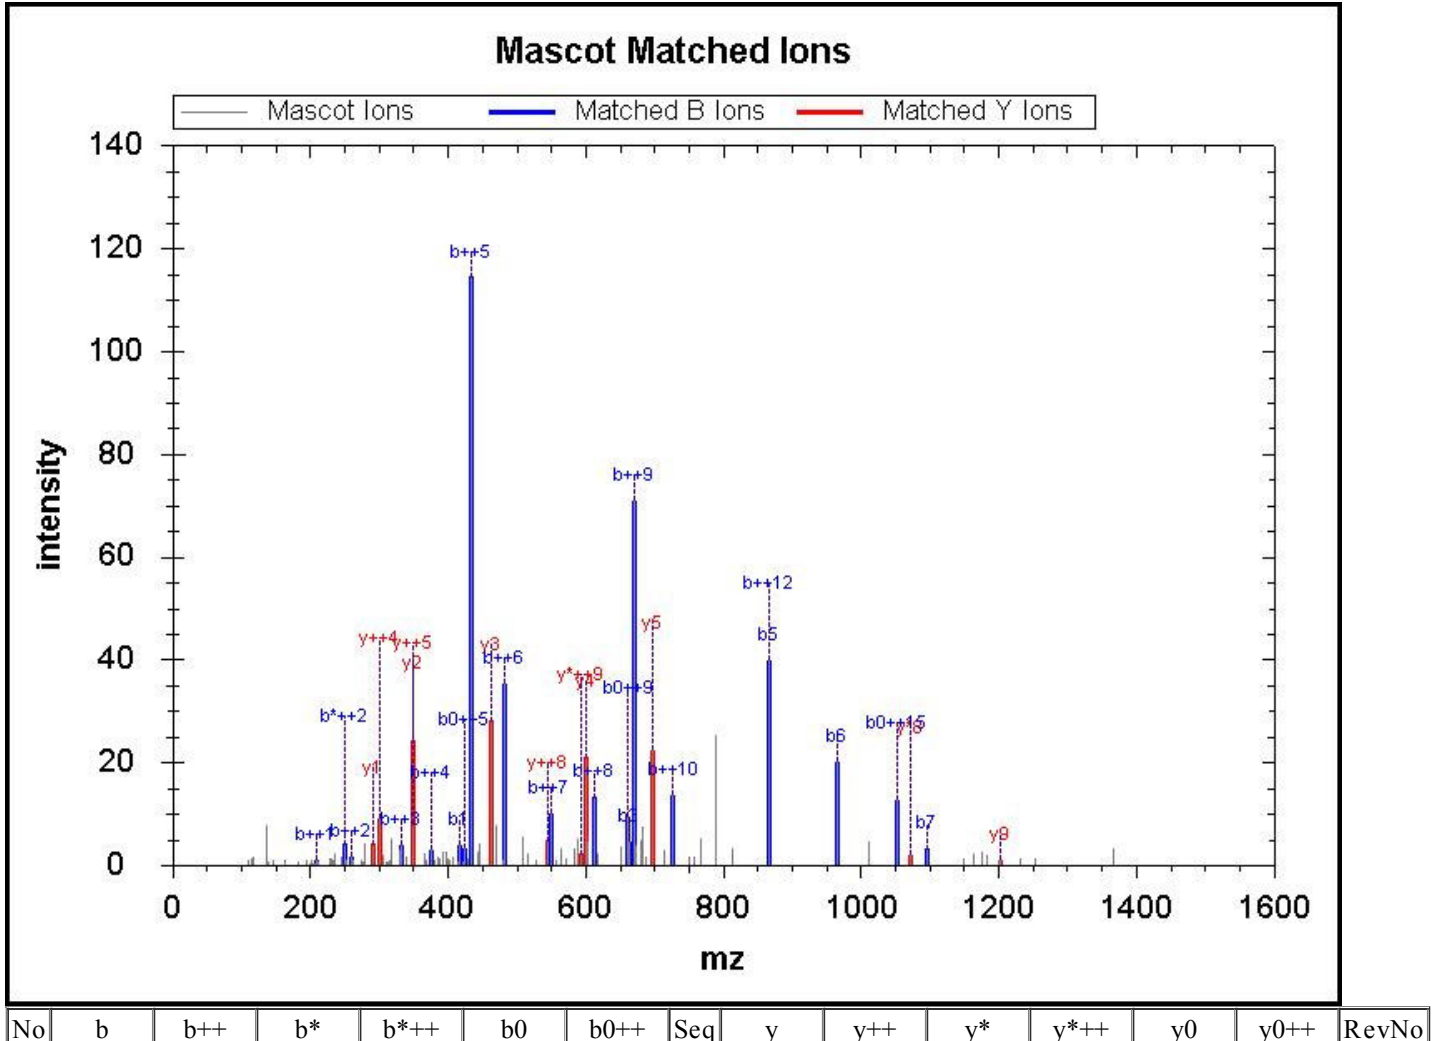

|    |          |          |          |          |          |          |   |          |          |          |          |          |          |    |
|----|----------|----------|----------|----------|----------|----------|---|----------|----------|----------|----------|----------|----------|----|
| 1  | 417.31   | 209.16   | 400.28   | 200.64   |          |          | K |          |          |          |          |          |          | 20 |
| 2  | 516.37   | 258.69   | 499.35   | 250.18   |          |          | V | 2,400.13 | 1,200.57 | 2,383.10 | 1,192.06 | 2,382.12 | 1,191.56 | 19 |
| 3  | 663.44   | 332.23   | 646.42   | 323.71   |          |          | F | 2,301.06 | 1,151.03 | 2,284.03 | 1,142.52 | 2,283.05 | 1,142.03 | 18 |
| 4  | 750.48   | 375.74   | 733.45   | 367.23   | 732.46   | 366.74   | S | 2,153.99 | 1,077.50 | 2,136.97 | 1,068.99 | 2,135.98 | 1,068.49 | 17 |
| 5  | 865.50   | 433.25   | 848.48   | 424.74   | 847.49   | 424.25   | D | 2,066.96 | 1,033.98 | 2,049.93 | 1,025.47 | 2,048.95 | 1,024.98 | 16 |
| 6  | 964.57   | 482.79   | 947.54   | 474.28   | 946.56   | 473.78   | V | 1,951.93 | 976.47   | 1,934.91 | 967.96   | 1,933.92 | 967.47   | 15 |
| 7  | 1,095.61 | 548.31   | 1,078.58 | 539.80   | 1,077.60 | 539.30   | M | 1,852.87 | 926.94   | 1,835.84 | 918.42   | 1,834.86 | 917.93   | 14 |
| 8  | 1,224.65 | 612.83   | 1,207.63 | 604.32   | 1,206.64 | 603.83   | E | 1,721.83 | 861.42   | 1,704.80 | 852.90   | 1,703.81 | 852.41   | 13 |
| 9  | 1,339.68 | 670.34   | 1,322.65 | 661.83   | 1,321.67 | 661.34   | D | 1,592.78 | 796.89   | 1,575.76 | 788.38   | 1,574.77 | 787.89   | 12 |
| 10 | 1,452.76 | 726.89   | 1,435.74 | 718.37   | 1,434.75 | 717.88   | L | 1,477.76 | 739.38   | 1,460.73 | 730.87   |          |          | 11 |
| 11 | 1,615.83 | 808.42   | 1,598.80 | 799.90   | 1,597.82 | 799.41   | Y | 1,364.67 | 682.84   | 1,347.65 | 674.33   |          |          | 10 |
| 12 | 1,729.87 | 865.44   | 1,712.84 | 856.93   | 1,711.86 | 856.43   | N | 1,201.61 | 601.31   | 1,184.58 | 592.79   |          |          | 9  |
| 13 | 1,892.93 | 946.97   | 1,875.91 | 938.46   | 1,874.92 | 937.97   | Y | 1,087.57 | 544.29   | 1,070.54 | 535.77   |          |          | 8  |
| 14 | 2,006.02 | 1,003.51 | 1,988.99 | 995.00   | 1,988.01 | 994.51   | I | 924.50   | 462.75   | 907.48   | 454.24   |          |          | 7  |
| 15 | 2,120.06 | 1,060.53 | 2,103.03 | 1,052.02 | 2,102.05 | 1,051.53 | N | 811.42   | 406.21   | 794.39   | 397.70   |          |          | 6  |
| 16 | 2,217.11 | 1,109.06 | 2,200.09 | 1,100.55 | 2,199.10 | 1,100.06 | P | 697.37   | 349.19   | 680.35   | 340.68   |          |          | 5  |
| 17 | 2,354.17 | 1,177.59 | 2,337.15 | 1,169.08 | 2,336.16 | 1,168.58 | H | 600.32   | 300.66   | 583.30   | 292.15   |          |          | 4  |
| 18 | 2,469.20 | 1,235.10 | 2,452.17 | 1,226.59 | 2,451.19 | 1,226.10 | N | 463.26   | 232.14   | 446.24   | 223.62   |          |          | 3  |
| 19 | 2,526.22 | 1,263.61 | 2,509.19 | 1,255.10 | 2,508.21 | 1,254.61 | G | 348.24   | 174.62   | 331.21   | 166.11   |          |          | 2  |
| 20 |          |          |          |          |          |          | K | 291.21   | 146.11   | 274.19   | 137.60   |          |          | 1  |

Query 60201 Hit 1

MS/MS Fragmentation of **SDPLLIQIPTSENPFK**

Found in **sp|Q9UBI6|GBG12\_HUMAN**, Guanine nucleotide-binding protein G(I)/G(S)/G(O) subunit gamma-12 OS=Homo sapiens  
GN=GNG12 PE=1 SV=3

Match to Query 60201: 2015.119from(672.7136,3+)

Title: 873: Sum of 2 scans in range 1941 (rt=53.1241, f=4, i=573) to 1942 (rt=53.1496, f=4, i=574)

[D:\lab212\membrane\Grace\Joyce\iTRAQ\_26\_2.raw]

Data File: Submitted from 20120508-1(merge) by Mascot Daemon on JOYCE-VAIO

Monoisotopic mass of neutral peptide Mr(calc): 2015.119

Variable modifications:

K16 iTRAQ4plex (K)

Ions Score: 52.28 Expect: 0.004

### Mascot Matched Ions

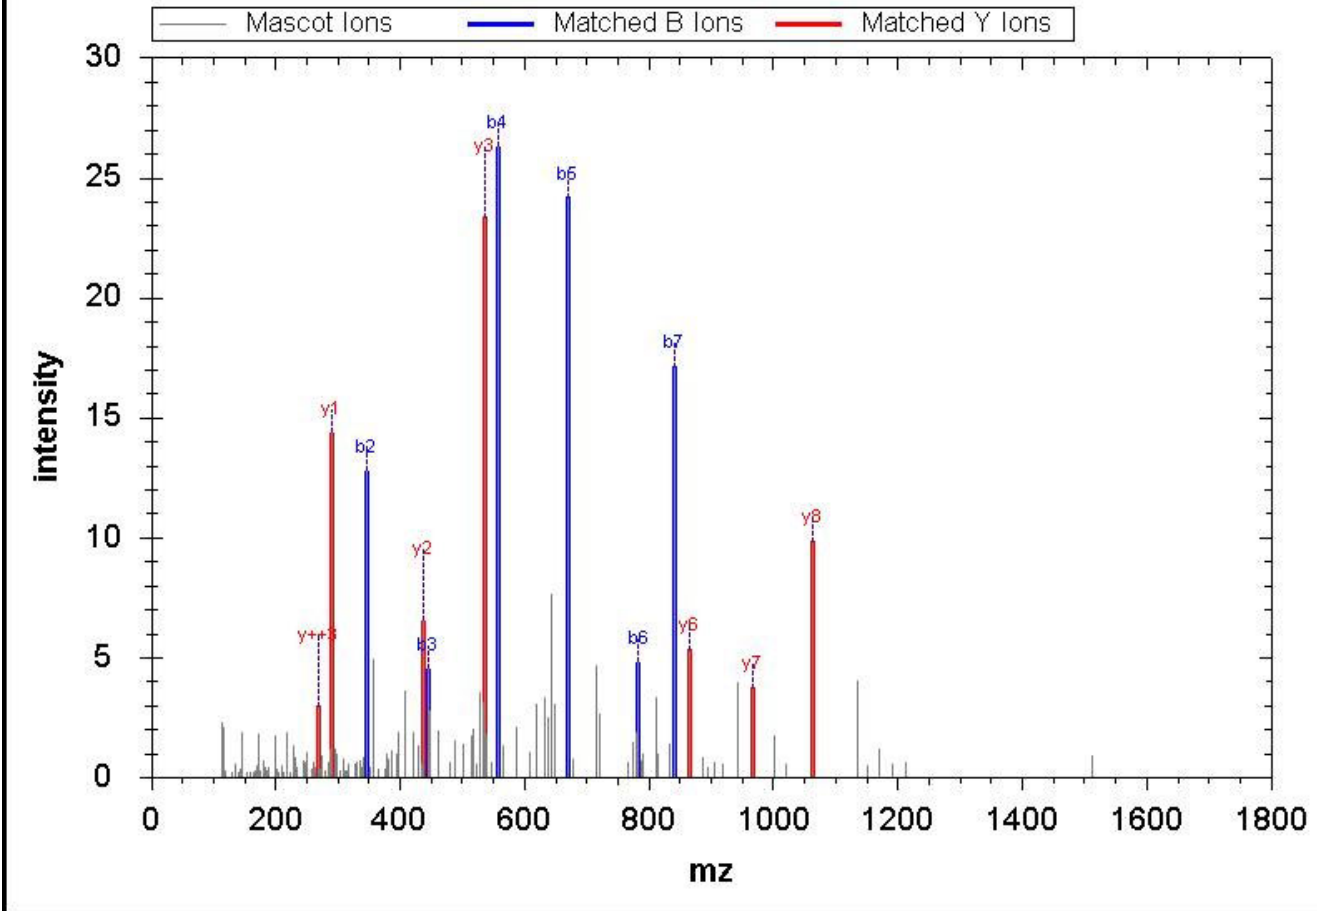

| No | b        | b++    | b*       | b*++   | b0       | b0++   | Seq | y        | y++    | y*       | y*++   | y0       | y0++   | RevNo |
|----|----------|--------|----------|--------|----------|--------|-----|----------|--------|----------|--------|----------|--------|-------|
| 1  | 232.14   | 116.57 |          |        | 214.13   | 107.57 | S   |          |        |          |        |          |        | 16    |
| 2  | 347.17   | 174.09 |          |        | 329.16   | 165.08 | D   | 1,784.99 | 893.00 | 1,767.97 | 884.49 | 1,766.98 | 883.99 | 15    |
| 3  | 444.22   | 222.61 |          |        | 426.21   | 213.61 | P   | 1,669.96 | 835.49 | 1,652.94 | 826.97 | 1,651.95 | 826.48 | 14    |
| 4  | 557.31   | 279.16 |          |        | 539.29   | 270.15 | L   | 1,572.91 | 786.96 | 1,555.89 | 778.45 | 1,554.90 | 777.95 | 13    |
| 5  | 670.39   | 335.70 |          |        | 652.38   | 326.69 | L   | 1,459.83 | 730.42 | 1,442.80 | 721.90 | 1,441.82 | 721.41 | 12    |
| 6  | 783.47   | 392.24 |          |        | 765.46   | 383.23 | I   | 1,346.74 | 673.88 | 1,329.72 | 665.36 | 1,328.73 | 664.87 | 11    |
| 7  | 840.49   | 420.75 |          |        | 822.48   | 411.75 | G   | 1,233.66 | 617.33 | 1,216.63 | 608.82 | 1,215.65 | 608.33 | 10    |
| 8  | 953.58   | 477.29 |          |        | 935.57   | 468.29 | I   | 1,176.64 | 588.82 | 1,159.61 | 580.31 | 1,158.63 | 579.82 | 9     |
| 9  | 1,050.63 | 525.82 |          |        | 1,032.62 | 516.81 | P   | 1,063.55 | 532.28 | 1,046.53 | 523.77 | 1,045.54 | 523.28 | 8     |
| 10 | 1,151.68 | 576.34 |          |        | 1,133.67 | 567.34 | T   | 966.50   | 483.75 | 949.47   | 475.24 | 948.49   | 474.75 | 7     |
| 11 | 1,238.71 | 619.86 |          |        | 1,220.70 | 610.85 | S   | 865.45   | 433.23 | 848.43   | 424.72 | 847.44   | 424.23 | 6     |
| 12 | 1,367.75 | 684.38 |          |        | 1,349.74 | 675.38 | E   | 778.42   | 389.71 | 761.40   | 381.20 | 760.41   | 380.71 | 5     |
| 13 | 1,481.80 | 741.40 | 1,464.77 | 732.89 | 1,463.79 | 732.40 | N   | 649.38   | 325.19 | 632.35   | 316.68 |          |        | 4     |
| 14 | 1,578.85 | 789.93 | 1,561.82 | 781.42 | 1,560.84 | 780.92 | P   | 535.34   | 268.17 | 518.31   | 259.66 |          |        | 3     |
| 15 | 1,725.92 | 863.46 | 1,708.89 | 854.95 | 1,707.91 | 854.46 | F   | 438.28   | 219.65 | 421.26   | 211.13 |          |        | 2     |
| 16 |          |        |          |        |          |        | K   | 291.21   | 146.11 | 274.19   | 137.60 |          |        | 1     |

Query 82968 Hit 1

MS/MS Fragmentation of **EQLEALQDLGLLQSGSISGLK**

Found in **sp|Q96DE0|NUD16\_HUMAN**, U8 snoRNA-decapping enzyme OS=Homo sapiens GN=NUDT16 PE=1 SV=2

Match to Query 82968: 2599.458from(867.4933,3+)

Title: 1023: Scan 2933 (rt=72.023, f=3, i=349) [D:\lab212\membrane\Grace\Joyce\iTRAQ\_25\_1.raw]

Data File: Submitted from 20120508-1(merge) by Mascot Daemon on JOYCE-VAIO

Monoisotopic mass of neutral peptide Mr(calc): 2599.458

Variable modifications:

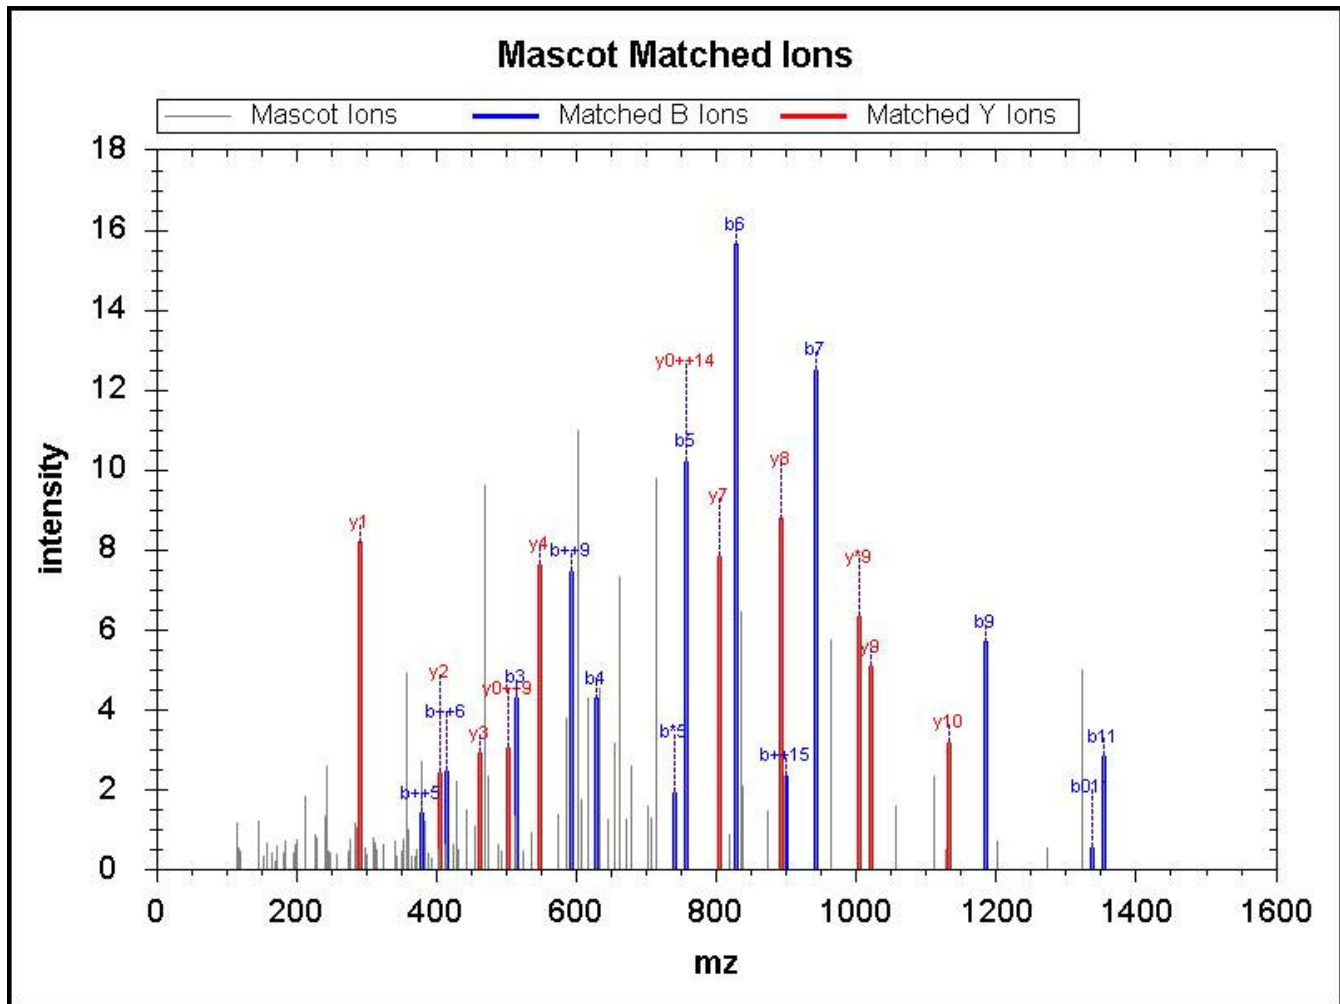

| No | b        | b++      | b*       | b*++     | b0       | b0++     | Seq | y        | y++      | y*       | y*++     | y0       | y0++     | RevNo |
|----|----------|----------|----------|----------|----------|----------|-----|----------|----------|----------|----------|----------|----------|-------|
| 1  | 274.15   | 137.58   |          |          | 256.14   | 128.57   | E   |          |          |          |          |          |          | 22    |
| 2  | 402.21   | 201.61   | 385.18   | 193.10   | 384.20   | 192.60   | Q   | 2,327.33 | 1,164.17 | 2,310.30 | 1,155.66 | 2,309.32 | 1,155.16 | 21    |
| 3  | 515.29   | 258.15   | 498.27   | 249.64   | 497.28   | 249.15   | L   | 2,199.27 | 1,100.14 | 2,182.25 | 1,091.63 | 2,181.26 | 1,091.13 | 20    |
| 4  | 628.38   | 314.69   | 611.35   | 306.18   | 610.37   | 305.69   | L   | 2,086.19 | 1,043.60 | 2,069.16 | 1,035.08 | 2,068.18 | 1,034.59 | 19    |
| 5  | 757.42   | 379.21   | 740.39   | 370.70   | 739.41   | 370.21   | E   | 1,973.10 | 987.06   | 1,956.08 | 978.54   | 1,955.09 | 978.05   | 18    |
| 6  | 828.46   | 414.73   | 811.43   | 406.22   | 810.45   | 405.73   | A   | 1,844.06 | 922.53   | 1,827.03 | 914.02   | 1,826.05 | 913.53   | 17    |
| 7  | 941.54   | 471.27   | 924.52   | 462.76   | 923.53   | 462.27   | L   | 1,773.02 | 887.02   | 1,756.00 | 878.50   | 1,755.01 | 878.01   | 16    |
| 8  | 1,069.60 | 535.30   | 1,052.57 | 526.79   | 1,051.59 | 526.30   | Q   | 1,659.94 | 830.47   | 1,642.91 | 821.96   | 1,641.93 | 821.47   | 15    |
| 9  | 1,184.63 | 592.82   | 1,167.60 | 584.30   | 1,166.62 | 583.81   | D   | 1,531.88 | 766.44   | 1,514.85 | 757.93   | 1,513.87 | 757.44   | 14    |
| 10 | 1,297.71 | 649.36   | 1,280.69 | 640.85   | 1,279.70 | 640.35   | L   | 1,416.85 | 708.93   | 1,399.83 | 700.42   | 1,398.84 | 699.93   | 13    |
| 11 | 1,354.73 | 677.87   | 1,337.71 | 669.36   | 1,336.72 | 668.87   | G   | 1,303.77 | 652.39   | 1,286.74 | 643.88   | 1,285.76 | 643.38   | 12    |
| 12 | 1,467.82 | 734.41   | 1,450.79 | 725.90   | 1,449.81 | 725.41   | L   | 1,246.75 | 623.88   | 1,229.72 | 615.36   | 1,228.74 | 614.87   | 11    |
| 13 | 1,580.90 | 790.95   | 1,563.88 | 782.44   | 1,562.89 | 781.95   | L   | 1,133.66 | 567.34   | 1,116.64 | 558.82   | 1,115.65 | 558.33   | 10    |
| 14 | 1,708.96 | 854.98   | 1,691.93 | 846.47   | 1,690.95 | 845.98   | Q   | 1,020.58 | 510.79   | 1,003.55 | 502.28   | 1,002.57 | 501.79   | 9     |
| 15 | 1,795.99 | 898.50   | 1,778.97 | 889.99   | 1,777.98 | 889.49   | S   | 892.52   | 446.76   | 875.50   | 438.25   | 874.51   | 437.76   | 8     |
| 16 | 1,853.01 | 927.01   | 1,835.99 | 918.50   | 1,835.00 | 918.01   | G   | 805.49   | 403.25   | 788.46   | 394.74   | 787.48   | 394.24   | 7     |
| 17 | 1,940.05 | 970.53   | 1,923.02 | 962.01   | 1,922.04 | 961.52   | S   | 748.47   | 374.74   | 731.44   | 366.22   | 730.46   | 365.73   | 6     |
| 18 | 2,053.13 | 1,027.07 | 2,036.10 | 1,018.56 | 2,035.12 | 1,018.06 | I   | 661.44   | 331.22   | 644.41   | 322.71   | 643.43   | 322.22   | 5     |
| 19 | 2,140.16 | 1,070.58 | 2,123.14 | 1,062.07 | 2,122.15 | 1,061.58 | S   | 548.35   | 274.68   | 531.33   | 266.17   | 530.34   | 265.67   | 4     |
| 20 | 2,197.18 | 1,099.10 | 2,180.16 | 1,090.58 | 2,179.17 | 1,090.09 | G   | 461.32   | 231.16   | 444.29   | 222.65   |          |          | 3     |
| 21 | 2,310.27 | 1,155.64 | 2,293.24 | 1,147.12 | 2,292.26 | 1,146.63 | L   | 404.30   | 202.65   | 387.27   | 194.14   |          |          | 2     |



Query 66686 Hit 1

MS/MS Fragmentation of **EHWNPAIVALVYNVLK**

Found in **sp|Q16537|2A5E\_HUMAN**, Serine/threonine-protein phosphatase 2A 56 kDa regulatory subunit epsilon isoform OS=Homo sapiens GN=PPP2R5E PE=1 SV=1

Match to Query 66686: 2153.21 from (718.7441,3+)

Title: 1176: Scan 2514 (rt=66.3898, f=3, i=398) [D:\lab212\membrane\Grace\Joyce\iTRAQ40.raw]

Data File: Submitted from 20120508-1(merge) by Mascot Daemon on JOYCE-VAIO

Monoisotopic mass of neutral peptide Mr(calc): 2153.21

Variable modifications:

K16 iTRAQ4plex (K)

Ions Score: 52.14 Expect: 0.003

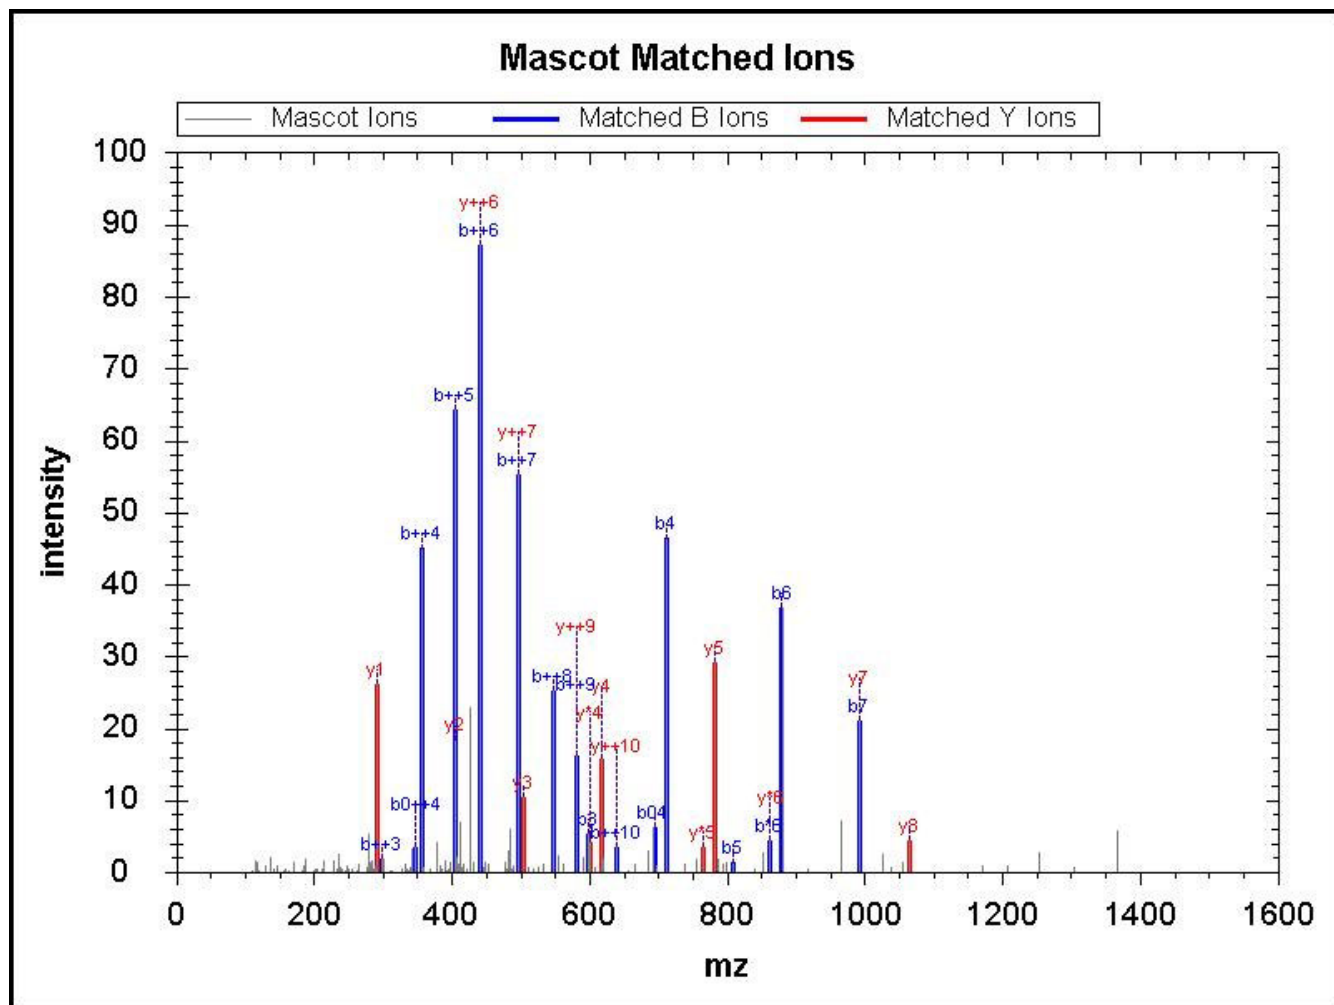

| No | b        | b++    | b*       | b*++   | b0       | b0++   | Seq | y        | y++    | y*       | y*++   | RevNo |
|----|----------|--------|----------|--------|----------|--------|-----|----------|--------|----------|--------|-------|
| 1  | 274.15   | 137.58 |          |        | 256.14   | 128.57 | E   |          |        |          |        | 16    |
| 2  | 411.21   | 206.11 |          |        | 393.20   | 197.10 | H   | 1,881.09 | 941.05 | 1,864.06 | 932.53 | 15    |
| 3  | 597.29   | 299.15 |          |        | 579.28   | 290.14 | W   | 1,744.03 | 872.52 | 1,727.00 | 864.00 | 14    |
| 4  | 711.33   | 356.17 | 694.31   | 347.66 | 693.32   | 347.16 | N   | 1,557.95 | 779.48 | 1,540.92 | 770.96 | 13    |
| 5  | 808.39   | 404.70 | 791.36   | 396.18 | 790.38   | 395.69 | P   | 1,443.91 | 722.46 | 1,426.88 | 713.94 | 12    |
| 6  | 879.42   | 440.22 | 862.40   | 431.70 | 861.41   | 431.21 | A   | 1,346.85 | 673.93 | 1,329.83 | 665.42 | 11    |
| 7  | 992.51   | 496.76 | 975.48   | 488.24 | 974.50   | 487.75 | I   | 1,275.82 | 638.41 | 1,258.79 | 629.90 | 10    |
| 8  | 1,091.58 | 546.29 | 1,074.55 | 537.78 | 1,073.56 | 537.29 | V   | 1,162.73 | 581.87 | 1,145.70 | 573.36 | 9     |
| 9  | 1,162.61 | 581.81 | 1,145.59 | 573.30 | 1,144.60 | 572.80 | A   | 1,063.66 | 532.34 | 1,046.64 | 523.82 | 8     |
| 10 | 1,275.70 | 638.35 | 1,258.67 | 629.84 | 1,257.69 | 629.35 | L   | 992.63   | 496.82 | 975.60   | 488.30 | 7     |
| 11 | 1,374.77 | 687.89 | 1,357.74 | 679.37 | 1,356.75 | 678.88 | V   | 879.54   | 440.27 | 862.52   | 431.76 | 6     |
| 12 | 1,537.83 | 769.42 | 1,520.80 | 760.90 | 1,519.82 | 760.41 | Y   | 780.47   | 390.74 | 763.45   | 382.23 | 5     |

|    |          |        |          |        |          |        |   |        |        |        |        |   |
|----|----------|--------|----------|--------|----------|--------|---|--------|--------|--------|--------|---|
| 13 | 1,651.87 | 826.44 | 1,634.84 | 817.93 | 1,633.86 | 817.43 | N | 617.41 | 309.21 | 600.38 | 300.70 | 4 |
| 14 | 1,750.94 | 875.97 | 1,733.91 | 867.46 | 1,732.93 | 866.97 | V | 503.37 | 252.19 | 486.34 | 243.67 | 3 |
| 15 | 1,864.02 | 932.52 | 1,847.00 | 924.00 | 1,846.01 | 923.51 | L | 404.30 | 202.65 | 387.27 | 194.14 | 2 |
| 16 |          |        |          |        |          |        | K | 291.21 | 146.11 | 274.19 | 137.60 | 1 |

Query 96626 Hit 1

MS/MS Fragmentation of **GTHMQHAYDFYKPDMLSEYPIVDGK**

Found in **sp|Q01581|HMC S1\_HUMAN**, Hydroxymethylglutaryl-CoA synthase

Match to Query 96626: 3373.648 from (844.4193, 4+)

Title: 408: Scan 1686 (rt=44.1872, f=2, i=253) [D:\lab212\membrane\Grace\Joyce\iTRAQ\_52\_1.raw]

Data File: Submitted from 20120508-1 (merge) by Mascot Daemon on JOYCE-VAIO

Monoisotopic mass of neutral peptide Mr(calc): 3373.648

Variable modifications:

K12 iTRAQ4plex (K)

K25 iTRAQ4plex (K)

Ions Score: 52.05 Expect: 0.006

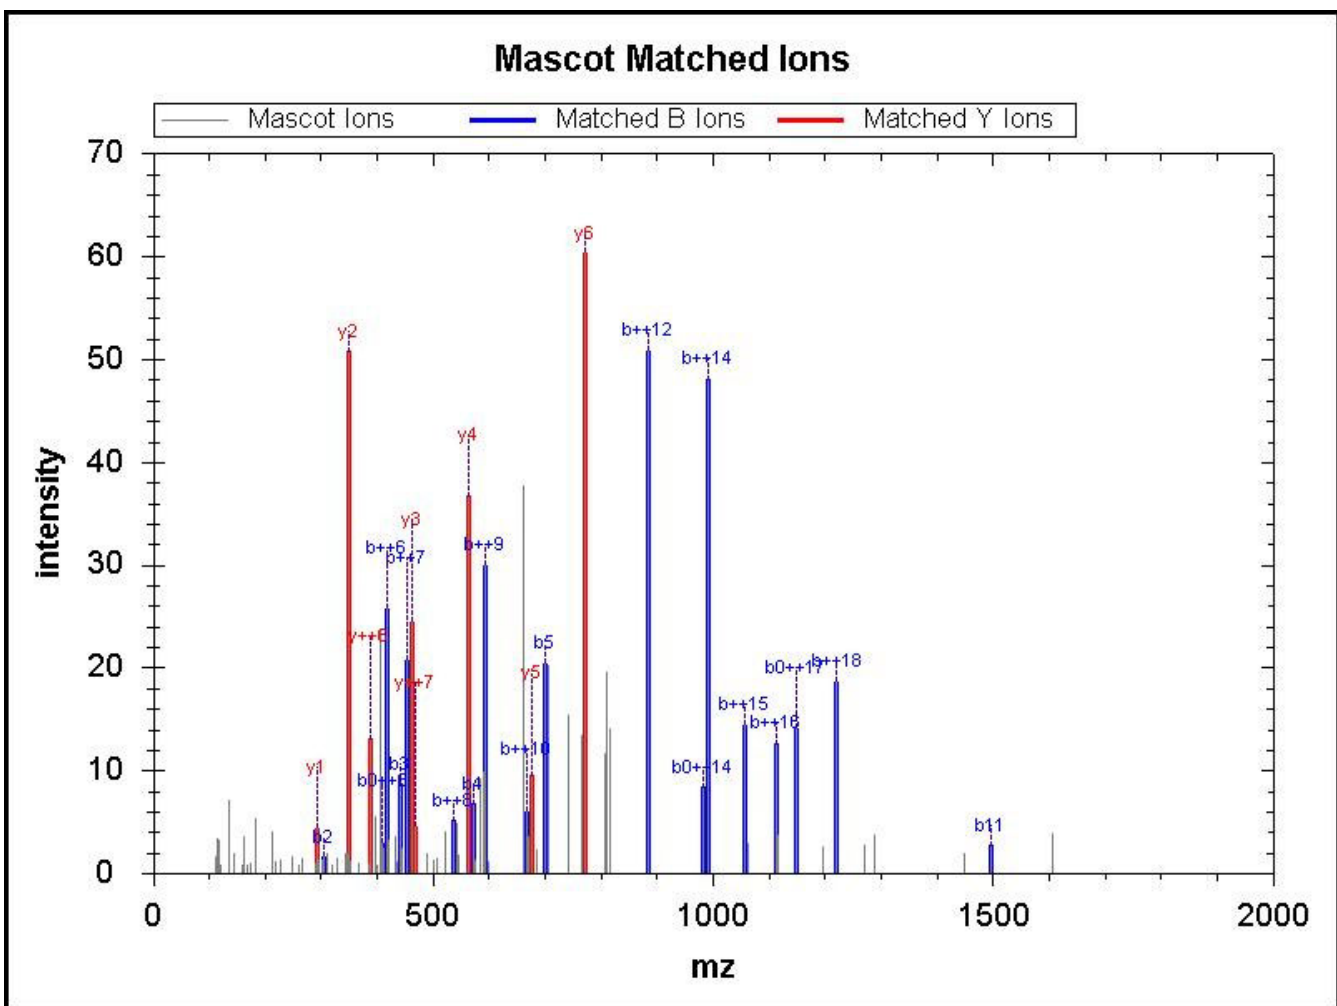

| No | b        | b++    | b*       | b*++   | b0       | b0++   | Seq | y        | y++      | y*       | y*++     | y0       | y0++     | RevNo |
|----|----------|--------|----------|--------|----------|--------|-----|----------|----------|----------|----------|----------|----------|-------|
| 1  | 202.13   | 101.57 |          |        |          |        | G   |          |          |          |          |          |          | 25    |
| 2  | 303.18   | 152.09 |          |        | 285.17   | 143.09 | T   | 3,173.53 | 1,587.27 | 3,156.50 | 1,578.76 | 3,155.52 | 1,578.26 | 24    |
| 3  | 440.24   | 220.62 |          |        | 422.23   | 211.62 | H   | 3,072.48 | 1,536.75 | 3,055.46 | 1,528.23 | 3,054.47 | 1,527.74 | 23    |
| 4  | 571.28   | 286.14 |          |        | 553.27   | 277.14 | M   | 2,935.42 | 1,468.22 | 2,918.40 | 1,459.70 | 2,917.41 | 1,459.21 | 22    |
| 5  | 699.34   | 350.17 | 682.31   | 341.66 | 681.33   | 341.17 | Q   | 2,804.38 | 1,402.70 | 2,787.36 | 1,394.18 | 2,786.37 | 1,393.69 | 21    |
| 6  | 836.40   | 418.70 | 819.37   | 410.19 | 818.38   | 409.70 | H   | 2,676.33 | 1,338.67 | 2,659.30 | 1,330.15 | 2,658.32 | 1,329.66 | 20    |
| 7  | 907.43   | 454.22 | 890.41   | 445.71 | 889.42   | 445.21 | A   | 2,539.27 | 1,270.14 | 2,522.24 | 1,261.62 | 2,521.26 | 1,261.13 | 19    |
| 8  | 1,070.50 | 535.75 | 1,053.47 | 527.24 | 1,052.49 | 526.75 | Y   | 2,468.23 | 1,234.62 | 2,451.20 | 1,226.11 | 2,450.22 | 1,225.61 | 18    |
| 9  | 1,185.52 | 593.27 | 1,168.50 | 584.75 | 1,167.51 | 584.26 | D   | 2,305.17 | 1,153.09 | 2,288.14 | 1,144.57 | 2,287.16 | 1,144.08 | 17    |

|    |          |          |          |          |          |          |   |          |          |          |          |          |          |    |
|----|----------|----------|----------|----------|----------|----------|---|----------|----------|----------|----------|----------|----------|----|
| 10 | 1,332.59 | 666.80   | 1,315.56 | 658.29   | 1,314.58 | 657.79   | F | 2,190.14 | 1,095.57 | 2,173.11 | 1,087.06 | 2,172.13 | 1,086.57 | 16 |
| 11 | 1,495.65 | 748.33   | 1,478.63 | 739.82   | 1,477.64 | 739.33   | Y | 2,043.07 | 1,022.04 | 2,026.04 | 1,013.53 | 2,025.06 | 1,013.03 | 15 |
| 12 | 1,767.85 | 884.43   | 1,750.83 | 875.92   | 1,749.84 | 875.42   | K | 1,880.01 | 940.51   | 1,862.98 | 931.99   | 1,862.00 | 931.50   | 14 |
| 13 | 1,864.90 | 932.96   | 1,847.88 | 924.44   | 1,846.89 | 923.95   | P | 1,607.81 | 804.41   | 1,590.78 | 795.90   | 1,589.80 | 795.40   | 13 |
| 14 | 1,979.93 | 990.47   | 1,962.90 | 981.96   | 1,961.92 | 981.46   | D | 1,510.76 | 755.88   | 1,493.73 | 747.37   | 1,492.75 | 746.88   | 12 |
| 15 | 2,110.97 | 1,055.99 | 2,093.95 | 1,047.48 | 2,092.96 | 1,046.98 | M | 1,395.73 | 698.37   | 1,378.70 | 689.86   | 1,377.72 | 689.36   | 11 |
| 16 | 2,224.06 | 1,112.53 | 2,207.03 | 1,104.02 | 2,206.05 | 1,103.53 | L | 1,264.69 | 632.85   | 1,247.66 | 624.34   | 1,246.68 | 623.84   | 10 |
| 17 | 2,311.09 | 1,156.05 | 2,294.06 | 1,147.53 | 2,293.08 | 1,147.04 | S | 1,151.61 | 576.31   | 1,134.58 | 567.79   | 1,133.60 | 567.30   | 9  |
| 18 | 2,440.13 | 1,220.57 | 2,423.10 | 1,212.06 | 2,422.12 | 1,211.56 | E | 1,064.57 | 532.79   | 1,047.55 | 524.28   | 1,046.56 | 523.79   | 8  |
| 19 | 2,603.19 | 1,302.10 | 2,586.17 | 1,293.59 | 2,585.18 | 1,293.10 | Y | 935.53   | 468.27   | 918.51   | 459.76   | 917.52   | 459.26   | 7  |
| 20 | 2,700.25 | 1,350.63 | 2,683.22 | 1,342.11 | 2,682.24 | 1,341.62 | P | 772.47   | 386.74   | 755.44   | 378.22   | 754.46   | 377.73   | 6  |
| 21 | 2,813.33 | 1,407.17 | 2,796.30 | 1,398.66 | 2,795.32 | 1,398.16 | I | 675.42   | 338.21   | 658.39   | 329.70   | 657.41   | 329.21   | 5  |
| 22 | 2,912.40 | 1,456.70 | 2,895.37 | 1,448.19 | 2,894.39 | 1,447.70 | V | 562.33   | 281.67   | 545.31   | 273.16   | 544.32   | 272.66   | 4  |
| 23 | 3,027.43 | 1,514.22 | 3,010.40 | 1,505.70 | 3,009.42 | 1,505.21 | D | 463.26   | 232.14   | 446.24   | 223.62   | 445.25   | 223.13   | 3  |
| 24 | 3,084.45 | 1,542.73 | 3,067.42 | 1,534.21 | 3,066.44 | 1,533.72 | G | 348.24   | 174.62   | 331.21   | 166.11   |          |          | 2  |
| 25 |          |          |          |          |          |          | K | 291.21   | 146.11   | 274.19   | 137.60   |          |          | 1  |

Query 47779 Hit 1

MS/MS Fragmentation of **YSHEVLSEENFK**

Found in **sp|Q7Z2W4|ZCCHV\_HUMAN**, Zinc finger CCCH-type antiviral protein 1 OS=Homo sapiens GN=ZC3HAV1 PE=1 SV=3

Match to Query 47779: 1768.892from(590.6379,3+)

Title: 405: Sum of 2 scans in range 932 (rt=30.7316, f=4, i=276) to 933 (rt=30.757, f=4, i=277)

[D:\lab212\membrane\GraceJoyce\iTRAQ\_43\_1.raw]

Data File: Submitted from 20120508-1(merge) by Mascot Daemon on JOYCE-VAIO

Monoisotopic mass of neutral peptide Mr(calc): 1768.892

Variable modifications:

K12 iTRAQ4plex (K)

Ions Score: 51.98 Expect: 0.005

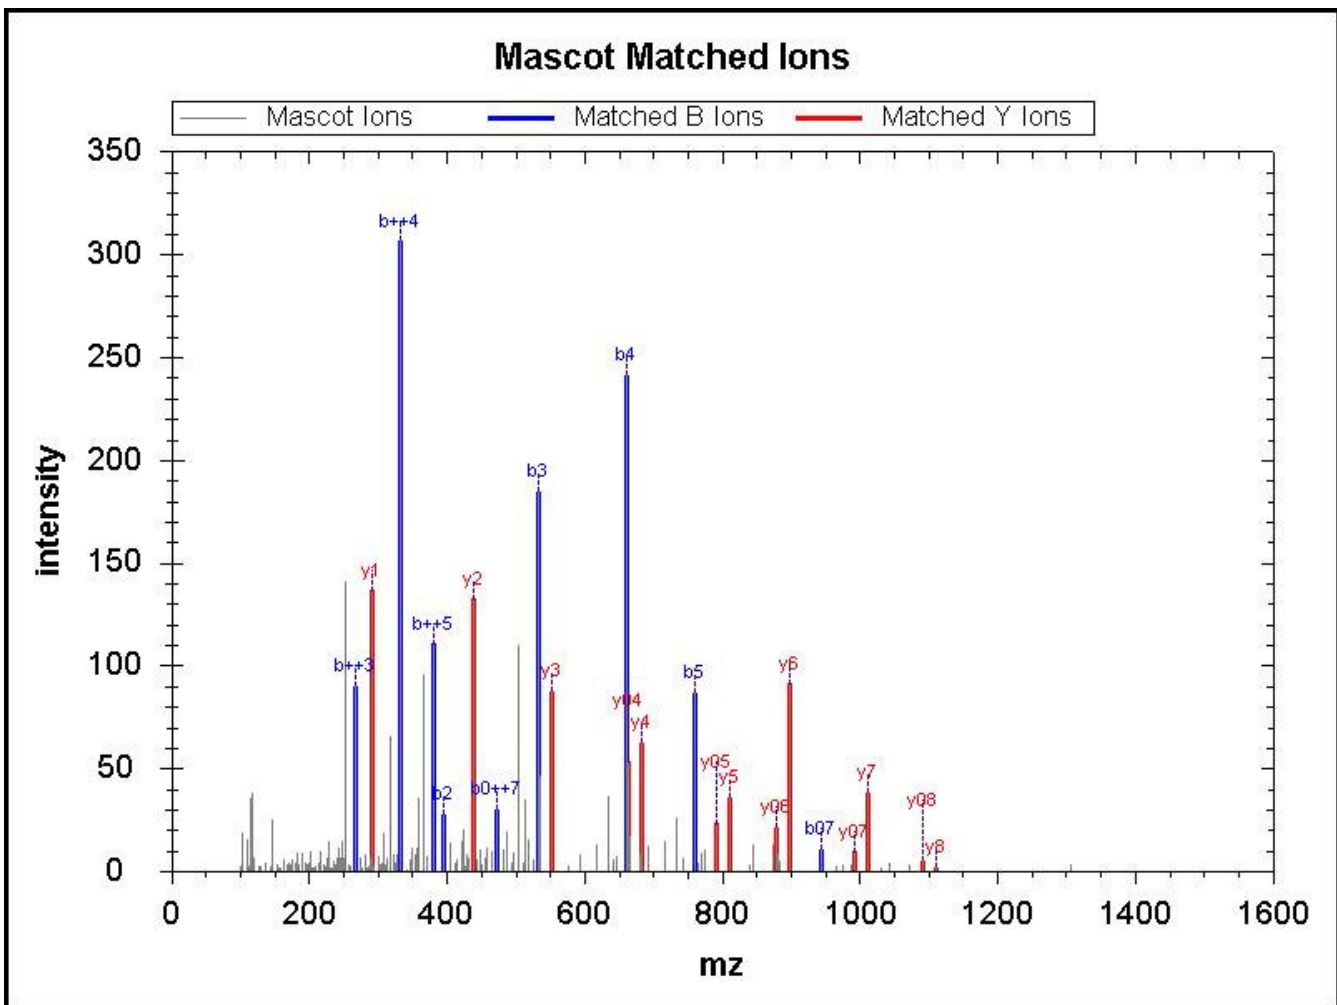

| No | b        | b++    | b*       | b*++   | b0       | b0++   | Seq | y        | y++    | y*       | y*++   | y0       | y0++   | RevNo |
|----|----------|--------|----------|--------|----------|--------|-----|----------|--------|----------|--------|----------|--------|-------|
| 1  | 308.17   | 154.59 |          |        |          |        | Y   |          |        |          |        |          |        | 12    |
| 2  | 395.20   | 198.11 |          |        | 377.19   | 189.10 | S   | 1,462.73 | 731.87 | 1,445.70 | 723.36 | 1,444.72 | 722.86 | 11    |
| 3  | 532.26   | 266.64 |          |        | 514.25   | 257.63 | H   | 1,375.70 | 688.35 | 1,358.67 | 679.84 | 1,357.69 | 679.35 | 10    |
| 4  | 661.31   | 331.16 |          |        | 643.30   | 322.15 | E   | 1,238.64 | 619.82 | 1,221.61 | 611.31 | 1,220.63 | 610.82 | 9     |
| 5  | 760.37   | 380.69 |          |        | 742.36   | 371.69 | V   | 1,109.60 | 555.30 | 1,092.57 | 546.79 | 1,091.59 | 546.30 | 8     |
| 6  | 873.46   | 437.23 |          |        | 855.45   | 428.23 | L   | 1,010.53 | 505.77 | 993.50   | 497.25 | 992.52   | 496.76 | 7     |
| 7  | 960.49   | 480.75 |          |        | 942.48   | 471.74 | S   | 897.44   | 449.23 | 880.42   | 440.71 | 879.43   | 440.22 | 6     |
| 8  | 1,089.53 | 545.27 |          |        | 1,071.52 | 536.27 | E   | 810.41   | 405.71 | 793.38   | 397.20 | 792.40   | 396.70 | 5     |
| 9  | 1,218.58 | 609.79 |          |        | 1,200.57 | 600.79 | E   | 681.37   | 341.19 | 664.34   | 332.67 | 663.36   | 332.18 | 4     |
| 10 | 1,332.62 | 666.81 | 1,315.59 | 658.30 | 1,314.61 | 657.81 | N   | 552.33   | 276.67 | 535.30   | 268.15 |          |        | 3     |
| 11 | 1,479.69 | 740.35 | 1,462.66 | 731.83 | 1,461.68 | 731.34 | F   | 438.28   | 219.65 | 421.26   | 211.13 |          |        | 2     |
| 12 |          |        |          |        |          |        | K   | 291.21   | 146.11 | 274.19   | 137.60 |          |        | 1     |

Query 66660 Hit 1

MS/MS Fragmentation of **FNHPEIVQLVSELEAER**

Found in **sp|Q7Z4H3|HDDC2\_HUMAN**, HD domain-containing protein 2 OS=Homo sapiens GN=HDDC2 PE=1 SV=1  
Match to Query 66660: 2153.127from(718.7164,3+)

Title: 946: Scan 2103 (rt=56.7804, f=3, i=321) [D:\lab212\membrane\Grace\Joyce\iTRAQ\_35\_2.raw]

Data File: Submitted from 20120508-1(merge) by Mascot Daemon on JOYCE-VAIO

Monoisotopic mass of neutral peptide Mr(calc): 2153.127

Variable modifications:

Ions Score: 51.88 Expect: 0.006

### Mascot Matched Ions

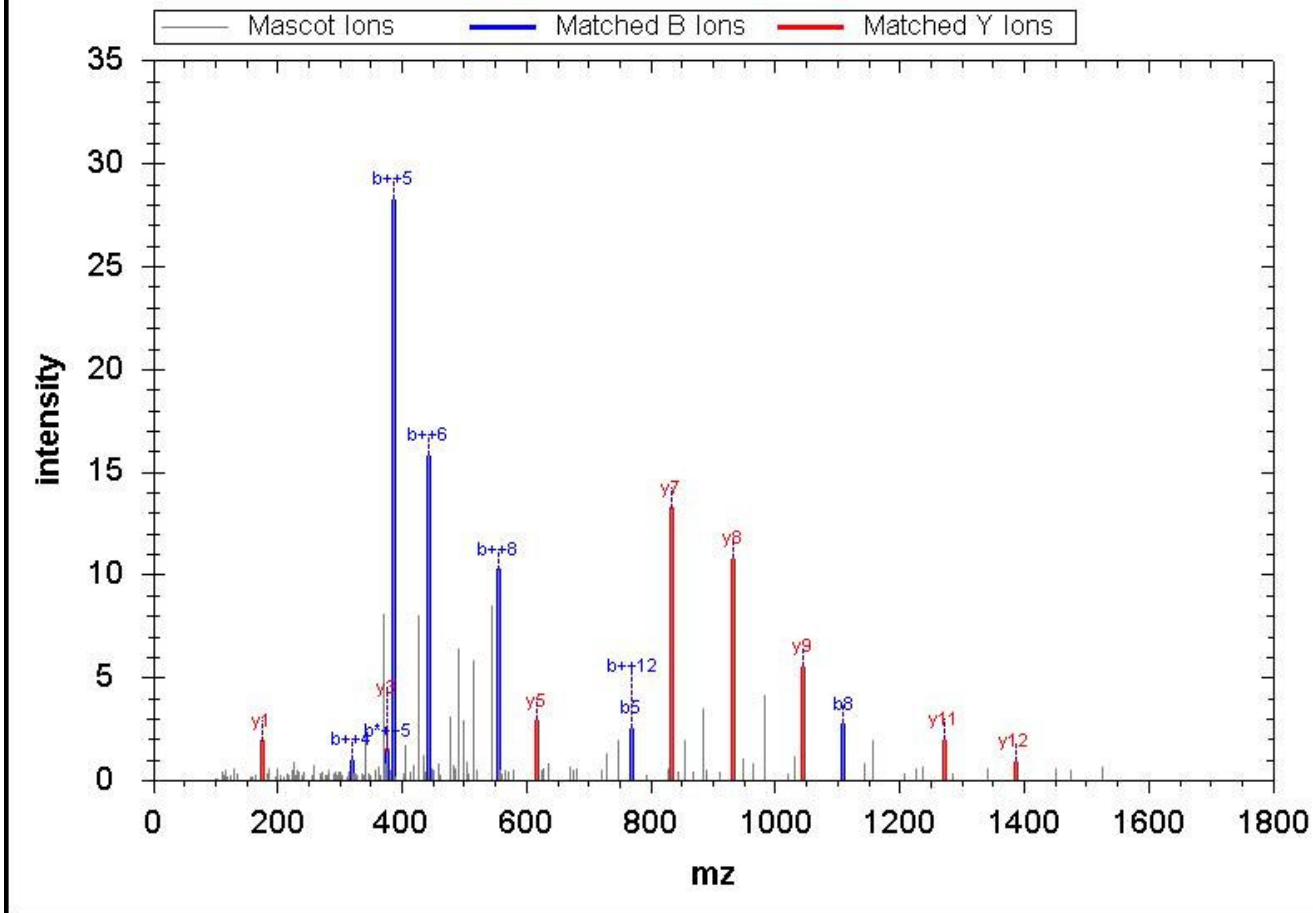

| No | b        | b <sub>++</sub> | b <sup>*</sup> | b <sub>+++</sub> | b <sub>0</sub> | b <sub>0++</sub> | Seq | y        | y <sub>++</sub> | y <sup>*</sup> | y <sub>+++</sub> | y <sub>0</sub> | y <sub>0++</sub> | RevNo |
|----|----------|-----------------|----------------|------------------|----------------|------------------|-----|----------|-----------------|----------------|------------------|----------------|------------------|-------|
| 1  | 292.18   | 146.59          |                |                  |                |                  | F   |          |                 |                |                  |                |                  | 17    |
| 2  | 406.22   | 203.61          | 389.19         | 195.10           |                |                  | N   | 1,862.96 | 931.98          | 1,845.93       | 923.47           | 1,844.95       | 922.98           | 16    |
| 3  | 543.28   | 272.14          | 526.25         | 263.63           |                |                  | H   | 1,748.92 | 874.96          | 1,731.89       | 866.45           | 1,730.91       | 865.96           | 15    |
| 4  | 640.33   | 320.67          | 623.31         | 312.16           |                |                  | P   | 1,611.86 | 806.43          | 1,594.83       | 797.92           | 1,593.85       | 797.43           | 14    |
| 5  | 769.37   | 385.19          | 752.35         | 376.68           | 751.36         | 376.19           | E   | 1,514.81 | 757.91          | 1,497.78       | 749.39           | 1,496.80       | 748.90           | 13    |
| 6  | 882.46   | 441.73          | 865.43         | 433.22           | 864.45         | 432.73           | I   | 1,385.76 | 693.39          | 1,368.74       | 684.87           | 1,367.75       | 684.38           | 12    |
| 7  | 981.53   | 491.27          | 964.50         | 482.75           | 963.52         | 482.26           | V   | 1,272.68 | 636.84          | 1,255.65       | 628.33           | 1,254.67       | 627.84           | 11    |
| 8  | 1,109.59 | 555.30          | 1,092.56       | 546.78           | 1,091.58       | 546.29           | Q   | 1,173.61 | 587.31          | 1,156.58       | 578.80           | 1,155.60       | 578.30           | 10    |
| 9  | 1,222.67 | 611.84          | 1,205.64       | 603.33           | 1,204.66       | 602.83           | L   | 1,045.55 | 523.28          | 1,028.53       | 514.77           | 1,027.54       | 514.27           | 9     |
| 10 | 1,321.74 | 661.37          | 1,304.71       | 652.86           | 1,303.73       | 652.37           | V   | 932.47   | 466.74          | 915.44         | 458.22           | 914.46         | 457.73           | 8     |
| 11 | 1,408.77 | 704.89          | 1,391.74       | 696.38           | 1,390.76       | 695.88           | S   | 833.40   | 417.20          | 816.37         | 408.69           | 815.39         | 408.20           | 7     |
| 12 | 1,537.81 | 769.41          | 1,520.79       | 760.90           | 1,519.80       | 760.40           | E   | 746.37   | 373.69          | 729.34         | 365.17           | 728.36         | 364.68           | 6     |
| 13 | 1,650.90 | 825.95          | 1,633.87       | 817.44           | 1,632.89       | 816.95           | L   | 617.33   | 309.17          | 600.30         | 300.65           | 599.31         | 300.16           | 5     |
| 14 | 1,779.94 | 890.47          | 1,762.91       | 881.96           | 1,761.93       | 881.47           | E   | 504.24   | 252.62          | 487.21         | 244.11           | 486.23         | 243.62           | 4     |
| 15 | 1,850.98 | 925.99          | 1,833.95       | 917.48           | 1,832.97       | 916.99           | A   | 375.20   | 188.10          | 358.17         | 179.59           | 357.19         | 179.10           | 3     |
| 16 | 1,980.02 | 990.51          | 1,962.99       | 982.00           | 1,962.01       | 981.51           | E   | 304.16   | 152.58          | 287.13         | 144.07           | 286.15         | 143.58           | 2     |
| 17 |          |                 |                |                  |                |                  | R   | 175.12   | 88.06           | 158.09         | 79.55            |                |                  | 1     |

Query 29285 Hit 1

MS/MS Fragmentation of **TSSEDADELHK**

Found in **sp|Q9UKX7|NUP50\_HUMAN**, Nuclear pore complex protein Nup50 OS=Homo sapiens GN=NUP50 PE=1 SV=2  
 Match to Query 29285: 1431.711 from (478.2444, 3+)

Title: 120: Scan 323 (rt=17.0072, f=3, i=45) [D:\lab212\membrane\Grace\Joyce\iTRAQ\_43\_1.raw]

Data File: Submitted from 20120508-1 (merge) by Mascot Daemon on JOYCE-VAIO

Monoisotopic mass of neutral peptide Mr(calc): 1431.711

Variable modifications:  
 K10 iTRAQ4plex (K)  
 Ions Score: 51.87 Expect: 0.005

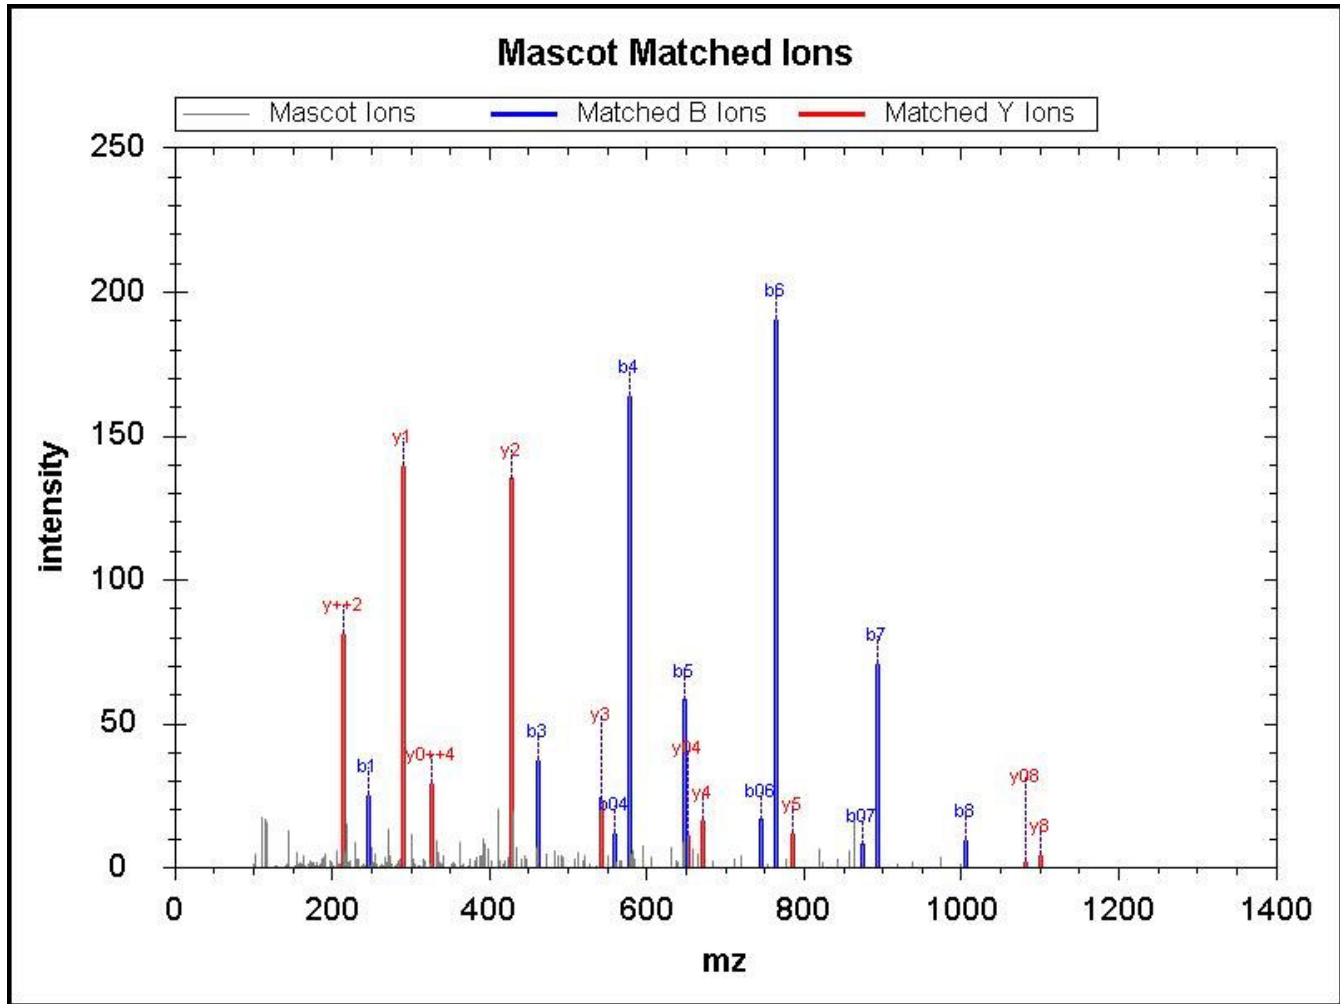

| No | b        | b++    | b0       | b0++   | Seq | y        | y++    | y*       | y*++   | y0       | y0++   | RevNo |
|----|----------|--------|----------|--------|-----|----------|--------|----------|--------|----------|--------|-------|
| 1  | 246.16   | 123.58 | 228.15   | 114.58 | T   |          |        |          |        |          |        | 10    |
| 2  | 333.19   | 167.10 | 315.18   | 158.09 | S   | 1,187.57 | 594.29 | 1,170.54 | 585.77 | 1,169.56 | 585.28 | 9     |
| 3  | 462.23   | 231.62 | 444.22   | 222.61 | E   | 1,100.53 | 550.77 | 1,083.51 | 542.26 | 1,082.52 | 541.77 | 8     |
| 4  | 577.26   | 289.13 | 559.25   | 280.13 | D   | 971.49   | 486.25 | 954.46   | 477.74 | 953.48   | 477.24 | 7     |
| 5  | 648.30   | 324.65 | 630.29   | 315.65 | A   | 856.46   | 428.74 | 839.44   | 420.22 | 838.45   | 419.73 | 6     |
| 6  | 763.32   | 382.16 | 745.31   | 373.16 | D   | 785.43   | 393.22 | 768.40   | 384.70 | 767.42   | 384.21 | 5     |
| 7  | 892.37   | 446.69 | 874.35   | 437.68 | E   | 670.40   | 335.70 | 653.37   | 327.19 | 652.39   | 326.70 | 4     |
| 8  | 1,005.45 | 503.23 | 987.44   | 494.22 | L   | 541.36   | 271.18 | 524.33   | 262.67 |          |        | 3     |
| 9  | 1,142.51 | 571.76 | 1,124.50 | 562.75 | H   | 428.27   | 214.64 | 411.25   | 206.13 |          |        | 2     |
| 10 |          |        |          |        | K   | 291.21   | 146.11 | 274.19   | 137.60 |          |        | 1     |

Query 66968 Hit 1

MS/MS Fragmentation of **TELQGLIGQLDEVSLEK**

Found in **sp|Q9UL15|BAG5\_HUMAN**, BAG family molecular chaperone regulator 5 OS=Homo sapiens GN=BAG5 PE=1 SV=1  
 Match to Query 66968: 2159.187 from (720.7364,3+)

Title: 1003: Scan 2213 (rt=59.2495, f=3, i=339) [D:\lab212\membrane\Grace\Joyce\iTRAQ\_26\_2.raw]

Data File: Submitted from 20120508-1(merge) by Mascot Daemon on JOYCE-VAIO

Monoisotopic mass of neutral peptide Mr(calc): 2159.187

Variable modifications:

K17 iTRAQ4plex (K)

Ions Score: 51.65 Expect: 0.005

### Mascot Matched Ions

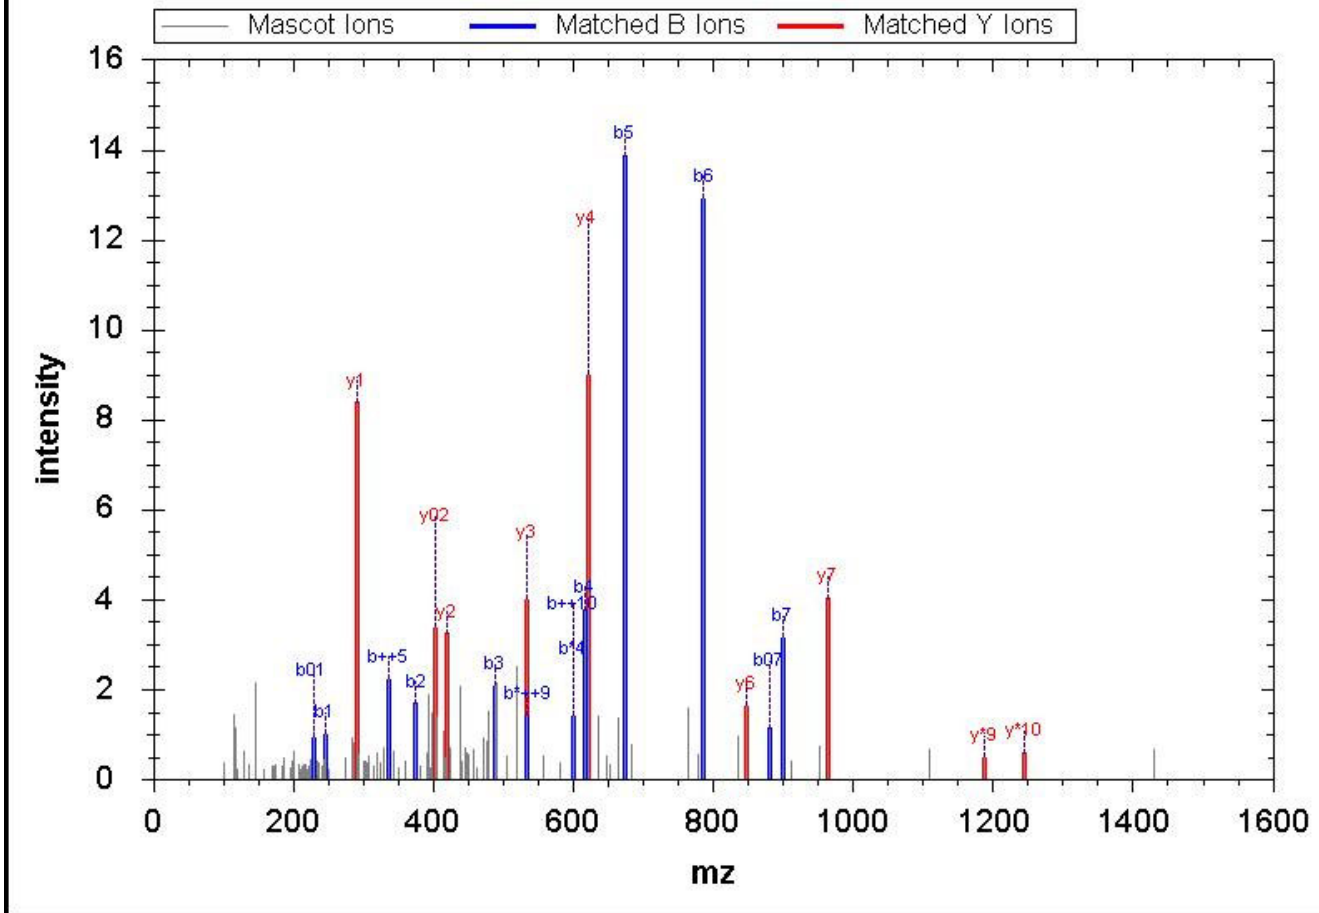

| No | b        | b++    | b*       | b*++   | b0       | b0++   | Seq | y        | y++    | y*       | y*++   | y0       | y0++   | RevNo |
|----|----------|--------|----------|--------|----------|--------|-----|----------|--------|----------|--------|----------|--------|-------|
| 1  | 246.16   | 123.58 |          |        | 228.15   | 114.58 | T   |          |        |          |        |          |        | 17    |
| 2  | 375.20   | 188.10 |          |        | 357.19   | 179.10 | E   | 1,915.05 | 958.03 | 1,898.02 | 949.52 | 1,897.04 | 949.02 | 16    |
| 3  | 488.28   | 244.65 |          |        | 470.27   | 235.64 | L   | 1,786.01 | 893.51 | 1,768.98 | 884.99 | 1,768.00 | 884.50 | 15    |
| 4  | 616.34   | 308.67 | 599.32   | 300.16 | 598.33   | 299.67 | Q   | 1,672.92 | 836.97 | 1,655.90 | 828.45 | 1,654.91 | 827.96 | 14    |
| 5  | 673.36   | 337.19 | 656.34   | 328.67 | 655.35   | 328.18 | G   | 1,544.87 | 772.94 | 1,527.84 | 764.42 | 1,526.85 | 763.93 | 13    |
| 6  | 786.45   | 393.73 | 769.42   | 385.21 | 768.44   | 384.72 | L   | 1,487.84 | 744.43 | 1,470.82 | 735.91 | 1,469.83 | 735.42 | 12    |
| 7  | 899.53   | 450.27 | 882.51   | 441.76 | 881.52   | 441.26 | I   | 1,374.76 | 687.88 | 1,357.73 | 679.37 | 1,356.75 | 678.88 | 11    |
| 8  | 956.55   | 478.78 | 939.53   | 470.27 | 938.54   | 469.77 | G   | 1,261.68 | 631.34 | 1,244.65 | 622.83 | 1,243.67 | 622.34 | 10    |
| 9  | 1,084.61 | 542.81 | 1,067.59 | 534.30 | 1,066.60 | 533.80 | Q   | 1,204.65 | 602.83 | 1,187.63 | 594.32 | 1,186.64 | 593.83 | 9     |
| 10 | 1,197.70 | 599.35 | 1,180.67 | 590.84 | 1,179.69 | 590.35 | L   | 1,076.60 | 538.80 | 1,059.57 | 530.29 | 1,058.58 | 529.80 | 8     |
| 11 | 1,312.72 | 656.87 | 1,295.70 | 648.35 | 1,294.71 | 647.86 | D   | 963.51   | 482.26 | 946.48   | 473.75 | 945.50   | 473.25 | 7     |
| 12 | 1,441.77 | 721.39 | 1,424.74 | 712.87 | 1,423.76 | 712.38 | E   | 848.48   | 424.75 | 831.46   | 416.23 | 830.47   | 415.74 | 6     |
| 13 | 1,540.83 | 770.92 | 1,523.81 | 762.41 | 1,522.82 | 761.92 | V   | 719.44   | 360.22 | 702.42   | 351.71 | 701.43   | 351.22 | 5     |
| 14 | 1,627.87 | 814.44 | 1,610.84 | 805.92 | 1,609.86 | 805.43 | S   | 620.37   | 310.69 | 603.35   | 302.18 | 602.36   | 301.69 | 4     |
| 15 | 1,740.95 | 870.98 | 1,723.92 | 862.47 | 1,722.94 | 861.97 | L   | 533.34   | 267.17 | 516.31   | 258.66 | 515.33   | 258.17 | 3     |
| 16 | 1,869.99 | 935.50 | 1,852.97 | 926.99 | 1,851.98 | 926.49 | E   | 420.26   | 210.63 | 403.23   | 202.12 | 402.25   | 201.63 | 2     |
| 17 |          |        |          |        |          |        | K   | 291.21   | 146.11 | 274.19   | 137.60 |          |        | 1     |

Query 56750 Hit 1

MS/MS Fragmentation of **DLHQGIEAASDEEDLR**

Found in **sp|Q9UKS6|PACN3\_HUMAN**, Protein kinase C and casein kinase substrate in neurons protein 3 OS=Homo sapiens  
GN=PACSIN3 PE=1 SV=2

Match to Query 56750: 1940.92from(647.9805,3+)

Title: 344: Scan 848 (rt=28.5138, f=3, i=120) [D:\lab212\membrane\Grace\Joyce\iTRAQ\_36\_2.raw]

Data File: Submitted from 20120508-1(merge) by Mascot Daemon on JOYCE-VAIO  
 Monoisotopic mass of neutral peptide Mr(calc): 1940.92  
 Variable modifications:  
 Ions Score: 51.62 Expect: 0.005

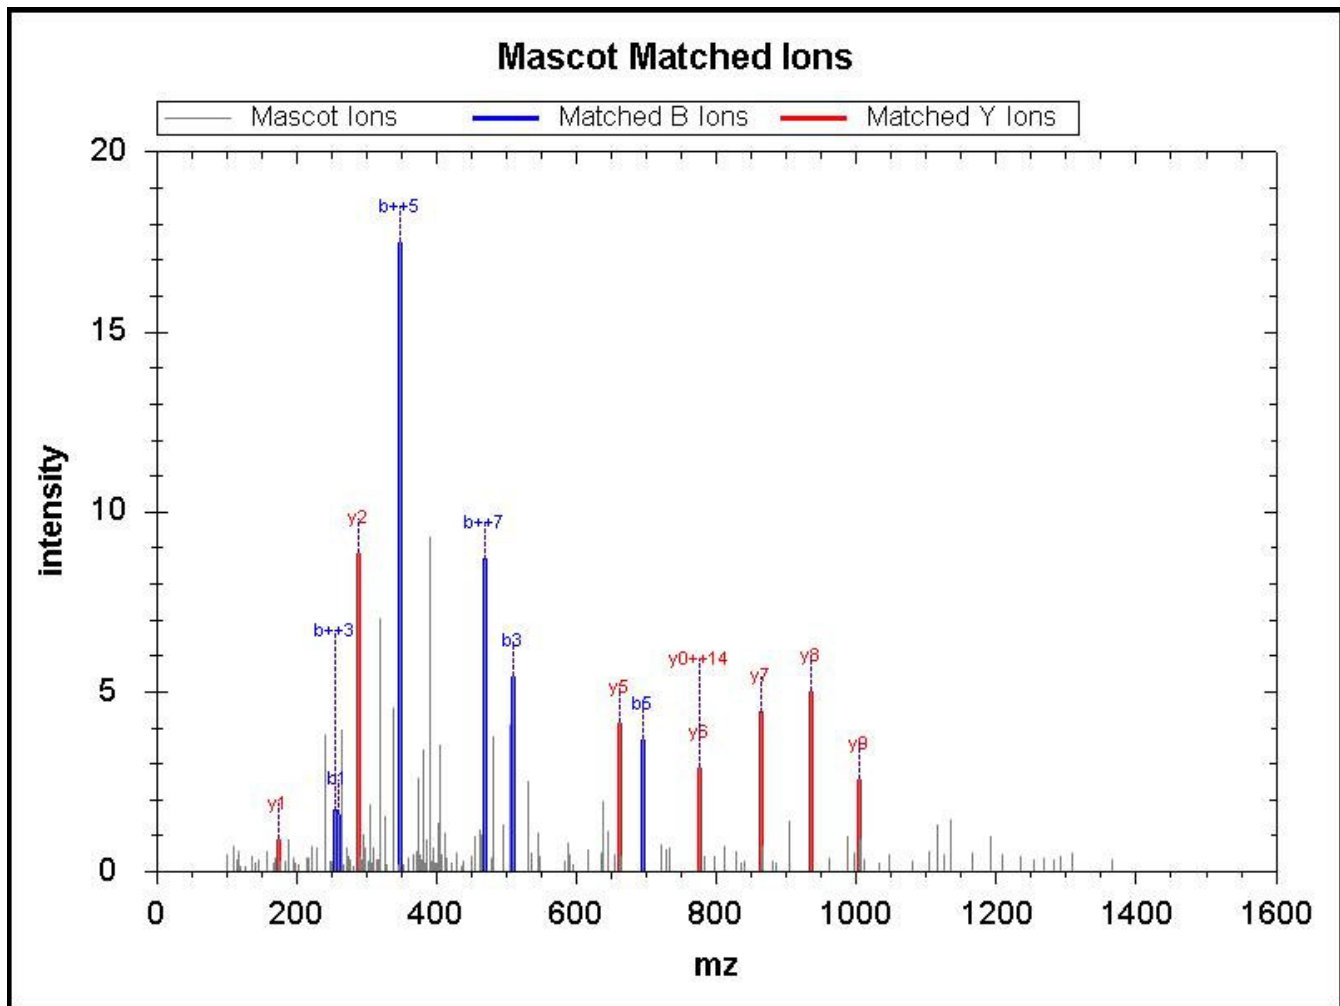

| No | b        | b++    | b*       | b*++   | b0       | b0++   | Seq | y        | y++    | y*       | y*++   | y0       | y0++   | RevNo |
|----|----------|--------|----------|--------|----------|--------|-----|----------|--------|----------|--------|----------|--------|-------|
| 1  | 260.14   | 130.57 |          |        | 242.13   | 121.57 | D   |          |        |          |        |          |        | 16    |
| 2  | 373.22   | 187.11 |          |        | 355.21   | 178.11 | L   | 1,682.80 | 841.90 | 1,665.77 | 833.39 | 1,664.79 | 832.90 | 15    |
| 3  | 510.28   | 255.64 |          |        | 492.27   | 246.64 | H   | 1,569.71 | 785.36 | 1,552.69 | 776.85 | 1,551.70 | 776.36 | 14    |
| 4  | 638.34   | 319.67 | 621.31   | 311.16 | 620.33   | 310.67 | Q   | 1,432.66 | 716.83 | 1,415.63 | 708.32 | 1,414.64 | 707.83 | 13    |
| 5  | 695.36   | 348.18 | 678.33   | 339.67 | 677.35   | 339.18 | G   | 1,304.60 | 652.80 | 1,287.57 | 644.29 | 1,286.59 | 643.80 | 12    |
| 6  | 808.44   | 404.73 | 791.42   | 396.21 | 790.43   | 395.72 | I   | 1,247.57 | 624.29 | 1,230.55 | 615.78 | 1,229.56 | 615.29 | 11    |
| 7  | 937.49   | 469.25 | 920.46   | 460.73 | 919.48   | 460.24 | E   | 1,134.49 | 567.75 | 1,117.46 | 559.24 | 1,116.48 | 558.74 | 10    |
| 8  | 1,008.52 | 504.77 | 991.50   | 496.25 | 990.51   | 495.76 | A   | 1,005.45 | 503.23 | 988.42   | 494.71 | 987.44   | 494.22 | 9     |
| 9  | 1,079.56 | 540.28 | 1,062.53 | 531.77 | 1,061.55 | 531.28 | A   | 934.41   | 467.71 | 917.38   | 459.20 | 916.40   | 458.70 | 8     |
| 10 | 1,166.59 | 583.80 | 1,149.57 | 575.29 | 1,148.58 | 574.79 | S   | 863.37   | 432.19 | 846.35   | 423.68 | 845.36   | 423.19 | 7     |
| 11 | 1,281.62 | 641.31 | 1,264.59 | 632.80 | 1,263.61 | 632.31 | D   | 776.34   | 388.67 | 759.32   | 380.16 | 758.33   | 379.67 | 6     |
| 12 | 1,410.66 | 705.83 | 1,393.64 | 697.32 | 1,392.65 | 696.83 | E   | 661.32   | 331.16 | 644.29   | 322.65 | 643.30   | 322.16 | 5     |
| 13 | 1,539.70 | 770.36 | 1,522.68 | 761.84 | 1,521.69 | 761.35 | E   | 532.27   | 266.64 | 515.25   | 258.13 | 514.26   | 257.63 | 4     |
| 14 | 1,654.73 | 827.87 | 1,637.70 | 819.36 | 1,636.72 | 818.86 | D   | 403.23   | 202.12 | 386.20   | 193.61 | 385.22   | 193.11 | 3     |
| 15 | 1,767.82 | 884.41 | 1,750.79 | 875.90 | 1,749.80 | 875.41 | L   | 288.20   | 144.61 | 271.18   | 136.09 |          |        | 2     |
| 16 |          |        |          |        |          |        | R   | 175.12   | 88.06  | 158.09   | 79.55  |          |        | 1     |

Query 78501 Hit 1

MS/MS Fragmentation of **GYSFYLAHEFFDVLPHK**  
 Found in **sp|Q7L592|MIDA\_HUMAN**, Protein midA homolog



Match to Query 78501: 2456.286from(615.0788,4+)

Title: 1048: Scan 2279 (rt=60.9907, f=3, i=357) [D:\lab212\membrane\Grace\Joyce\iTRAQ\_54\_2.raw]

Data File: Submitted from 20120508-1(merge) by Mascot Daemon on JOYCE-VAIO

Monoisotopic mass of neutral peptide Mr(calc): 2456.286

Variable modifications:

K18 :iTRAQ4plex (K)

Ions Score: 51.55 Expect: 0.006

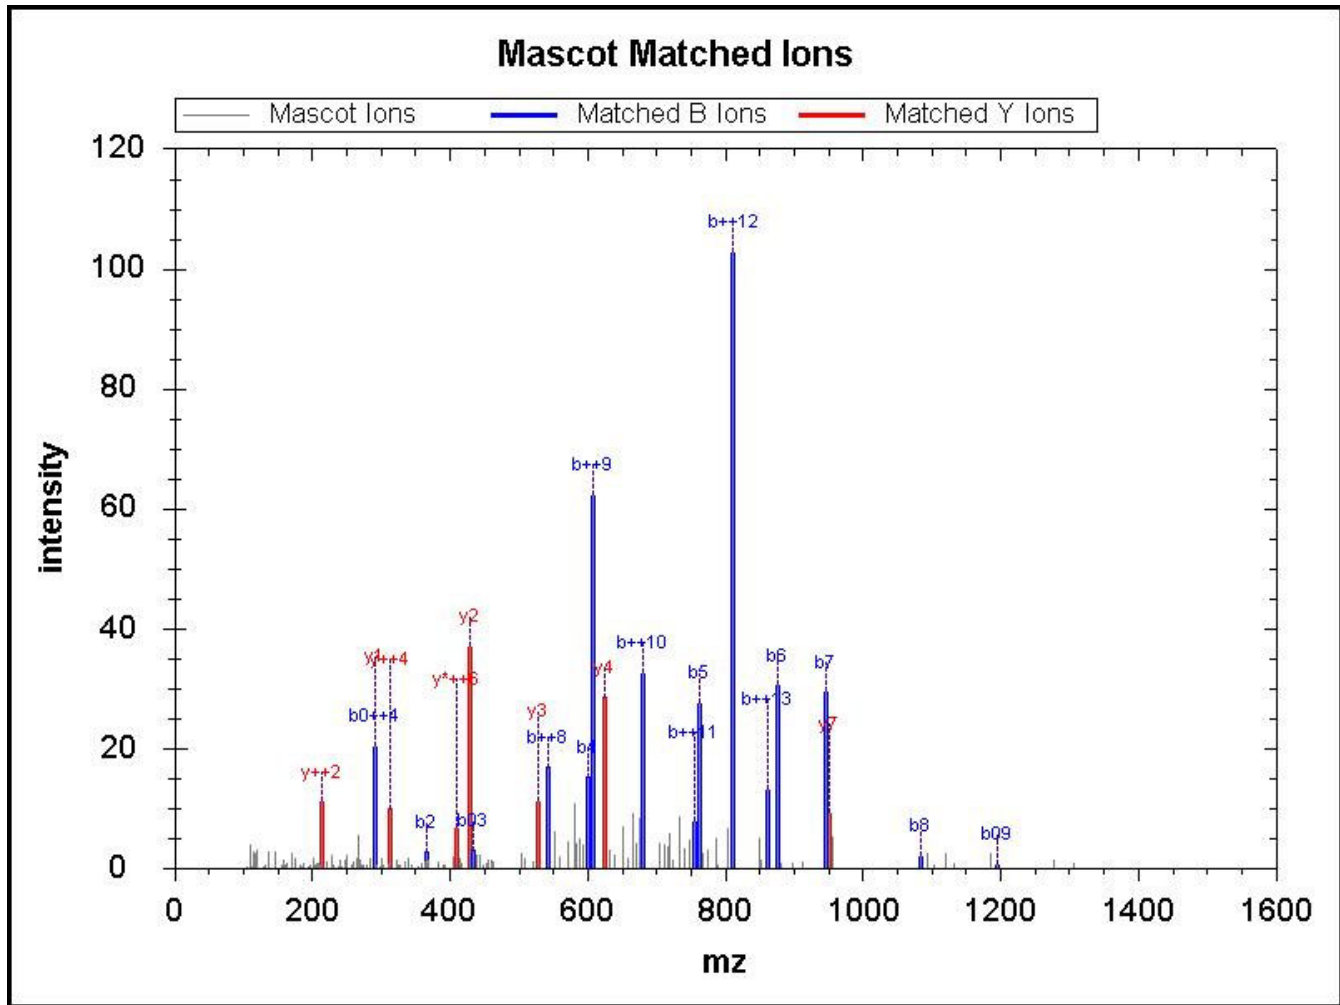

| No | b        | b++      | b0       | b0++     | Seq | y        | y++      | y*       | y*++     | y0       | y0++     | RevNo |
|----|----------|----------|----------|----------|-----|----------|----------|----------|----------|----------|----------|-------|
| 1  | 202.13   | 101.57   |          |          | G   |          |          |          |          |          |          | 18    |
| 2  | 365.19   | 183.10   |          |          | Y   | 2,256.16 | 1,128.58 | 2,239.13 | 1,120.07 | 2,238.15 | 1,119.58 | 17    |
| 3  | 452.23   | 226.62   | 434.22   | 217.61   | S   | 2,093.10 | 1,047.05 | 2,076.07 | 1,038.54 | 2,075.09 | 1,038.05 | 16    |
| 4  | 599.29   | 300.15   | 581.28   | 291.15   | F   | 2,006.07 | 1,003.54 | 1,989.04 | 995.02   | 1,988.06 | 994.53   | 15    |
| 5  | 762.36   | 381.68   | 744.35   | 372.68   | Y   | 1,859.00 | 930.00   | 1,841.97 | 921.49   | 1,840.99 | 921.00   | 14    |
| 6  | 875.44   | 438.22   | 857.43   | 429.22   | L   | 1,695.93 | 848.47   | 1,678.91 | 839.96   | 1,677.92 | 839.47   | 13    |
| 7  | 946.48   | 473.74   | 928.47   | 464.74   | A   | 1,582.85 | 791.93   | 1,565.82 | 783.42   | 1,564.84 | 782.92   | 12    |
| 8  | 1,083.54 | 542.27   | 1,065.53 | 533.27   | H   | 1,511.81 | 756.41   | 1,494.79 | 747.90   | 1,493.80 | 747.40   | 11    |
| 9  | 1,212.58 | 606.79   | 1,194.57 | 597.79   | E   | 1,374.75 | 687.88   | 1,357.73 | 679.37   | 1,356.74 | 678.88   | 10    |
| 10 | 1,359.65 | 680.33   | 1,341.64 | 671.32   | F   | 1,245.71 | 623.36   | 1,228.68 | 614.85   | 1,227.70 | 614.35   | 9     |
| 11 | 1,506.72 | 753.86   | 1,488.71 | 744.86   | F   | 1,098.64 | 549.83   | 1,081.62 | 541.31   | 1,080.63 | 540.82   | 8     |
| 12 | 1,621.74 | 811.38   | 1,603.73 | 802.37   | D   | 951.57   | 476.29   | 934.55   | 467.78   | 933.56   | 467.29   | 7     |
| 13 | 1,720.81 | 860.91   | 1,702.80 | 851.90   | V   | 836.55   | 418.78   | 819.52   | 410.26   |          |          | 6     |
| 14 | 1,833.90 | 917.45   | 1,815.89 | 908.45   | L   | 737.48   | 369.24   | 720.45   | 360.73   |          |          | 5     |
| 15 | 1,930.95 | 965.98   | 1,912.94 | 956.97   | P   | 624.39   | 312.70   | 607.37   | 304.19   |          |          | 4     |
| 16 | 2,030.02 | 1,015.51 | 2,012.01 | 1,006.51 | V   | 527.34   | 264.17   | 510.32   | 255.66   |          |          | 3     |
| 17 | 2,167.08 | 1,084.04 | 2,149.07 | 1,075.04 | H   | 428.27   | 214.64   | 411.25   | 206.13   |          |          | 2     |

|    |  |  |  |  |   |        |        |        |        |  |  |   |
|----|--|--|--|--|---|--------|--------|--------|--------|--|--|---|
| 18 |  |  |  |  | K | 291.21 | 146.11 | 274.19 | 137.60 |  |  | 1 |
|----|--|--|--|--|---|--------|--------|--------|--------|--|--|---|
